# Supplementary material for: Oncoprotein AEG-1 is an endoplasmic reticulum RNA-binding protein whose interactome is enriched in organelle resident protein-encoding mRNAs
Source: PubMed Central journal article supplement — RNA. 2018 May;24(5):688–703. doi: 10.1261/rna.063313.117 (PMC5900566; doi:10.1261/rna.063313.117), 2018-05
Supplement: supp_063313.117_Supplemental_Table_2_Set_1.pdf [file supp_063313.117_Supplemental_Table_2_Set_1.pdf]

| #Refseq Gene | Cluster start | Cluster end | Cluster score |
|--------------|---------------|-------------|---------------|
| NM_001080825 | TMEM120B      | 6801 6839   | 6.73598845977 |
| NM_018476    | BEX1 435      | 506         | 5.94203171117 |
| NM_004107    | FCGRT 904     | 970         | 5.28688685208 |
| NM_004107    | FCGRT 1130    | 1216        | 6.60898196623 |
| NM_004104    | FASN 4051     | 4089        | 5.35453491128 |
| NM_004104    | FASN 6516     | 6590        | 6.09551810562 |
| NM_004104    | FASN 5503     | 5559        | 6.3585457804  |
| NM_004104    | FASN 4788     | 4841        | 4.77358327968 |
| NM_004104    | FASN 767      | 817         | 6.09551786971 |
| NM_004104    | FASN 4464     | 4498        | 6.35453491128 |
| NM_004104    | FASN 3090     | 3228        | 6.94351501218 |
| NM_004104    | FASN 5428     | 5499        | 6.09551137457 |
| NM_004104    | FASN 5812     | 5893        | 5.77359001074 |
| NM_004104    | FASN 4382     | 4449        | 5.35855227554 |
| NM_004104    | FASN 2616     | 2670        | 3.68945080135 |
| NM_004104    | FASN 4917     | 5052        | 7.35855251146 |
| NM_004104    | FASN 5314     | 5392        | 7.23302162937 |
| NM_004104    | FASN 8433     | 8474        | 3.77358327968 |
| NM_004104    | FASN 6154     | 6209        | 6.09551810562 |
| NM_004104    | FASN 3567     | 3637        | 5.35855250391 |
| NM_007100    | ATP5I 239     | 278         | 1.54655581744 |
| NM_007107    | SSR3 515      | 565         | 6.47528546246 |
| NM_007107    | SSR3 365      | 420         | 4.15335713166 |
| NM_007107    | SSR3 422      | 463         | 5.39114625308 |
| NM_000483    | APOC2 368     | 408         | 3.5205845322  |
| NM_000483    | APOC2 294     | 340         | 3.52460212482 |
| NM_012181    | FKBP8 113     | 166         | 6.42037285945 |
| NM_012181    | FKBP8 700     | 751         | 3.6130177017  |
| NM_001682    | ATP2B1 3471   | 3540        | 7.27545336875 |
| NM_001682    | ATP2B1 2079   | 2113        | 7.51324898531 |
| NM_001682    | ATP2B1 2206   | 2257        | 6.27545336875 |
| NM_001683    | ATP2B2 1227   | 1253        | 9.40626149304 |
| NM_001680    | FXVD2 63      | 114         | 7.95987939048 |
| NM_001686    | ATP5B 1184    | 1221        | 4.52993439332 |
| NM_001686    | ATP5B 629     | 695         | 4.52992766227 |
| NM_021029    | RPL36A 341    | 378         | 1.17525312239 |
| NM_001011725 | HNRNPA1L2     | 1347 1417   | 2.90301632945 |
| NM_003359    | UGDH 1149     | 1205        | 3.71516188934 |
| NM_005660    | SLC35A2 1275  | 1333        | 9.50998633331 |
| NM_020199    | C5orf15 550   | 644         | 9.26871810744 |
| NM_020198    | CCDC47 1008   | 1053        | 5.40966218889 |
| NM_020198    | CCDC47 947    | 993         | 6.17519693526 |
| NM_020198    | CCDC47 1546   | 1615        | 5.78817381214 |
| NM_020198    | CCDC47 742    | 824         | 6.78817381215 |
| NM_020198    | CCDC47 1255   | 1293        | 5.25765909522 |
| NM_020198    | CCDC47 1690   | 1754        | 3.66867899455 |
| NM_020198    | CCDC47 1446   | 1495        | 5.08371649383 |
| NM_020198    | CCDC47 1306   | 1330        | 3.58855738534 |
| NM_020198    | CCDC47 1201   | 1249        | 4.67269659473 |

|              |          |       |       |                    |
|--------------|----------|-------|-------|--------------------|
| NM_020198    | CCDC47   | 684   | 724   | 5.08773385809      |
| NM_020198    | CCDC47   | 514   | 589   | 5.087734094        |
| NM_020198    | CCDC47   | 259   | 309   | 3.58855738534      |
| NM_020198    | CCDC47   | 825   | 847   | 3.08371649383      |
| NM_020198    | CCDC47   | 356   | 442   | 5.67269659473      |
| NM_020198    | CCDC47   | 874   | 944   | 4.40966218889      |
| NM_020190    | OLFML3   | 501   | 539   | 11.4272681346      |
| NM_020190    | OLFML3   | 452   | 494   | 11.690302312       |
| NM_020190    | OLFML3   | 1085  | 1130  | 11.4272681419      |
| NM_020190    | OLFML3   | 769   | 846   | 12.4272681421      |
| NM_005665    | EVI5     | 246   | 265   | 7.39031573111      |
| NM_003688    | CASK     | 2566  | 2587  | 8.08118779235      |
| NM_003681    | PDXK     | 4747  | 4765  | 5.60142541956      |
| NM_003681    | PDXK     | 4610  | 4631  | 5.01646291884      |
| NM_003681    | PDXK     | 5706  | 5740  | 6.01646291884      |
| NM_003685    | KHSRP    | 893   | 963   | 3.81453021456      |
| NM_001127320 | UBAP2L   | 802   | 837   | 3.76045291535      |
| NM_001127321 | CBX5     | 11224 | 11245 | 5.31351634509      |
| NM_002889    | RARRES2  | 341   | 377   | 5.34966321518      |
| NM_002889    | RARRES2  | 111   | 165   | 8.16103550149      |
| NM_002889    | RARRES2  | 560   | 587   | 5.26954160597      |
| NM_002889    | RARRES2  | 473   | 553   | 8.67560891024      |
| NM_002889    | RARRES2  | 390   | 463   | 8.93864331607      |
| NM_024292    | UBL5     | 327   | 365   | 5.32989823577      |
| NM_024294    | C6orf106 |       | 100   | 125 5.27384069812  |
| NM_032508    | TMEM185A |       | 130   | 183 7.13952111752  |
| NM_002087    | GRN      | 247   | 288   | 8.2065829643       |
| NM_002087    | GRN      | 1099  | 1176  | 8.72115613713      |
| NM_002087    | GRN      | 2073  | 2129  | 8.39922804202      |
| NM_002087    | GRN      | 189   | 239   | 7.72115590121      |
| NM_002087    | GRN      | 799   | 892   | 8.56915304369      |
| NM_002087    | GRN      | 1189  | 1267  | 7.98419030705      |
| NM_002087    | GRN      | 289   | 360   | 7.31508883286      |
| NM_002087    | GRN      | 1968  | 2058  | 9.85865966088      |
| NM_002087    | GRN      | 1018  | 1097  | 8.98419054297      |
| NM_002087    | GRN      | 1630  | 1805  | 10.7567800469      |
| NM_002087    | GRN      | 386   | 470   | 8.39922804224      |
| NM_002087    | GRN      | 531   | 684   | 9.9227899983       |
| NM_002087    | GRN      | 1806  | 1914  | 9.4866908835       |
| NM_002087    | GRN      | 893   | 1007  | 9.9227899983       |
| NM_002087    | GRN      | 1275  | 1581  | 11.2065829643      |
| NM_015602    | TOR1AIP1 |       | 1595  | 1632 8.76202343971 |
| NM_015602    | TOR1AIP1 |       | 1832  | 1939 9.76604103966 |
| NM_015601    | HERC4    | 219   | 240   | 6.90922050642      |
| NM_002223    | ITPR2    | 10083 | 10102 | 3.72115867344      |
| NM_002224    | ITPR3    | 7835  | 7882  | 8.56682046556      |
| NM_002224    | ITPR3    | 7073  | 7126  | 7.8298548714       |
| NM_001004060 | NOM02    | 438   | 469   | 4.37173320915      |
| NM_001004060 | NOM02    | 239   | 321   | 5.59814323066      |
| NM_001004060 | NOM02    | 1742  | 1853  | 7.64876930373      |

|              |       |      |      |               |
|--------------|-------|------|------|---------------|
| NM_001004060 | NOM02 | 2316 | 2396 | 6.25021992724 |
| NM_001004060 | NOM02 | 3384 | 3433 | 5.96071331005 |
| NM_001004060 | NOM02 | 19   | 84   | 4.37557705901 |
| NM_001004060 | NOM02 | 2398 | 2463 | 3.79061455828 |
| NM_001004060 | NOM02 | 962  | 1022 | 5.37575080932 |
| NM_001004060 | NOM02 | 1465 | 1522 | 5.96071331005 |
| NM_001004060 | NOM02 | 1595 | 1635 | 5.59814323066 |
| NM_001004060 | NOM02 | 2887 | 2929 | 5.3757508091  |
| NM_001004060 | NOM02 | 2013 | 2057 | 5.3757508091  |
| NM_001004060 | NOM02 | 3076 | 3114 | 6.11271640349 |
| NM_001004060 | NOM02 | 1383 | 1436 | 4.7907883086  |
| NM_001004060 | NOM02 | 710  | 758  | 4.7907883086  |
| NM_001004060 | NOM02 | 1693 | 1741 | 4.7907883086  |
| NM_001004060 | NOM02 | 1885 | 1920 | 5.96071331005 |
| NM_001004060 | NOM02 | 2482 | 2543 | 5.59814323066 |
| NM_001004060 | NOM02 | 787  | 827  | 4.79061455828 |
| NM_001004060 | NOM02 | 3000 | 3050 | 4.37575080932 |
| NM_001004060 | NOM02 | 160  | 229  | 5.7907883086  |
| NM_001004060 | NOM02 | 3545 | 3588 | 3.78677070843 |
| NM_001004060 | NOM02 | 2275 | 2312 | 3.79061455828 |
| NM_001004060 | NOM02 | 336  | 412  | 5.96071331005 |
| NM_001004060 | NOM02 | 1163 | 1192 | 2.70664909922 |
| NM_001004060 | NOM02 | 3245 | 3299 | 4.7907883086  |
| NM_001004060 | NOM02 | 3646 | 3700 | 2.78677070843 |
| NM_001004060 | NOM02 | 2750 | 2853 | 6.59814323066 |
| NM_001004060 | NOM02 | 2097 | 2192 | 5.11271640349 |
| NM_001004060 | NOM02 | 871  | 959  | 5.11271640349 |
| NM_001004060 | NOM02 | 2574 | 2691 | 2.7907883086  |
| NM_001004060 | NOM02 | 1266 | 1339 | 5.59814323066 |
| NM_001004067 | NOM03 | 3447 | 3496 | 5.989124152   |
| NM_001004067 | NOM03 | 1649 | 1716 | 3.81919915056 |
| NM_001004067 | NOM03 | 1528 | 1585 | 5.62655407261 |
| NM_001004067 | NOM03 | 3139 | 3189 | 6.81919915056 |
| NM_001004067 | NOM03 | 3308 | 3362 | 5.62655407261 |
| NM_001004067 | NOM03 | 3061 | 3113 | 4.40416165128 |
| NM_001004067 | NOM03 | 773  | 821  | 5.14112724544 |
| NM_001004067 | NOM03 | 2379 | 2459 | 5.989124152   |
| NM_001004067 | NOM03 | 2545 | 2606 | 4.81919915056 |
| NM_001004067 | NOM03 | 2160 | 2255 | 5.14112724544 |
| NM_001004067 | NOM03 | 1756 | 1804 | 3.81919915056 |
| NM_001004067 | NOM03 | 3608 | 3651 | 3.81902540024 |
| NM_001004067 | NOM03 | 4077 | 4137 | 5.98510655183 |
| NM_001004067 | NOM03 | 657  | 708  | 2.81518155038 |
| NM_001004067 | NOM03 | 850  | 890  | 3.81902540024 |
| NM_001004067 | NOM03 | 1805 | 1916 | 7.34276110661 |
| NM_001004067 | NOM03 | 223  | 291  | 6.14112724544 |
| NM_001004067 | NOM03 | 1948 | 1983 | 5.14112724544 |
| NM_001004067 | NOM03 | 2076 | 2120 | 4.81919914301 |
| NM_001004067 | NOM03 | 2923 | 2992 | 4.40416165128 |
| NM_001004067 | NOM03 | 2461 | 2526 | 4.81518155038 |

|              |          |      |      |                    |
|--------------|----------|------|------|--------------------|
| NM_001004067 | NOM03    | 388  | 476  | 5.81919915056      |
| NM_001004067 | NOM03    | 1586 | 1644 | 4.40416165106      |
| NM_001004067 | NOM03    | 1446 | 1499 | 5.40416165128      |
| NM_001004067 | NOM03    | 2813 | 2916 | 5.81919915056      |
| NM_001004067 | NOM03    | 501  | 530  | 2.81518155038      |
| NM_001004067 | NOM03    | 2667 | 2754 | 3.81919915056      |
| NM_001004067 | NOM03    | 302  | 384  | 5.62655407261      |
| NM_001004067 | NOM03    | 3709 | 3831 | 5.989124152        |
| NM_001004067 | NOM03    | 576  | 615  | 2.73505994117      |
| NM_001004067 | NOM03    | 934  | 1085 | 5.81919915056      |
| NM_005685    | GTF2IRD1 |      | 3167 | 3227 10.7964629169 |
| NM_018050    | MANSC1   | 1507 | 1538 | 7.5773399155       |
| NM_001130006 | GSPT1    | 243  | 298  | 4.9963407532       |
| NM_001130006 | GSPT1    | 1214 | 1277 | 4.50689632586      |
| NM_001130005 | ACTN1    | 1440 | 1493 | 4.67667944951      |
| NM_001130005 | ACTN1    | 1726 | 1788 | 5.09171694879      |
| NM_001142355 | NIF3L1   | 596  | 614  | 5.97323286678      |
| NM_079834    | SCAMP4   | 186  | 254  | 7.63818463963      |
| NM_079834    | SCAMP4   | 607  | 698  | 9.7536685881       |
| NM_014914    | AGAP1    | 541  | 569  | 7.31914151366      |
| NM_014916    | LMTK2    | 202  | 281  | 10.0988213894      |
| NM_001005335 | HNRNPL   | 1695 | 1741 | 2.47932105512      |
| NM_001005335 | HNRNPL   | 1388 | 1454 | 4.14440516506      |
| NM_001853    | COL9A3   | 211  | 299  | 9.34993509238      |
| NM_001853    | COL9A3   | 1791 | 1860 | 8.89050347374      |
| NM_001853    | COL9A3   | 1366 | 1410 | 7.80636426436      |
| NM_001853    | COL9A3   | 926  | 996  | 8.21243156863      |
| NM_001853    | COL9A3   | 415  | 482  | 5.89049674269      |
| NM_001853    | COL9A3   | 694  | 747  | 7.47546573855      |
| NM_001853    | COL9A3   | 999  | 1065 | 8.21243156863      |
| NM_001853    | COL9A3   | 1575 | 1612 | 7.47529222415      |
| NM_001859    | SLC31A1  | 639  | 676  | 6.48827154005      |
| NM_001204510 | EIF4A1   | 668  | 732  | 3.64768187366      |
| NM_001204510 | EIF4A1   | 972  | 1004 | 3.05870200868      |
| NM_001204510 | EIF4A1   | 207  | 273  | 2.6436645094       |
| NM_001204510 | EIF4A1   | 1158 | 1239 | 2.06271960131      |
| NM_004649    | C21orf33 |      | 887  | 907 5.56523984755  |
| NM_001201380 | CNTNAP3B |      | 2405 | 2440 11.6952932245 |
| NM_004315    | ASAH1    | 1387 | 1434 | 4.28475449861      |
| NM_004315    | ASAH1    | 1232 | 1277 | 3.28475449861      |
| NM_004315    | ASAH1    | 1130 | 1205 | 5.28476122966      |
| NM_004315    | ASAH1    | 830  | 917  | 5.7441928483       |
| NM_025029    | MZT2B    | 505  | 574  | 5.64964481877      |
| NM_025029    | MZT2B    | 591  | 649  | 5.0606649538       |
| NM_016456    | TMEM9    | 462  | 534  | 7.4840443764       |
| NM_016454    | TMEM85   | 517  | 547  | 7.6739109266       |
| NM_001689    | ATP5G3   | 271  | 309  | 3.59646552788      |
| NM_001689    | ATP5G3   | 2307 | 2342 | 2.01150302716      |
| NM_001024649 | CANX     | 1379 | 1431 | 5.66579963102      |
| NM_001024649 | CANX     | 588  | 618  | 3.00283461075      |

|              |           |      |      |                |               |
|--------------|-----------|------|------|----------------|---------------|
| NM_001024649 | CANX      | 618  | 664  | 4.3337329082   |               |
| NM_001024649 | CANX      | 700  | 741  | 4.73980021247  |               |
| NM_001024649 | CANX      | 2700 | 2753 | 3.0028346183   |               |
| NM_001024649 | CANX      | 57   | 99   | 4.22522680372  |               |
| NM_001024649 | CANX      | 782  | 819  | 1.41786538653  |               |
| NM_001024649 | CANX      | 1012 | 1066 | 3.41787211758  |               |
| NM_001024649 | CANX      | 122  | 255  | 6.7754241222   |               |
| NM_001024649 | CANX      | 1067 | 1254 | 7.48396130804  |               |
| NM_001024649 | CANX      | 1906 | 1949 | 4.0028346183   |               |
| NM_001024649 | CANX      | 321  | 562  | 7.46226623694  |               |
| NM_001024649 | CANX      | 863  | 996  | 6.54715513452  |               |
| NM_001024649 | CANX      | 1332 | 1365 | 2.41385451741  |               |
| NM_001024649 | CANX      | 1441 | 1888 | 8.10437264476  |               |
| NM_006640    | SEPT9     | 3508 | 3560 | 3.64997145849  |               |
| NM_006648    | WNK2      | 2454 | 2497 | 9.90155608312  |               |
| NM_002945    | RPA1      | 1579 | 1621 | 5.90186138703  |               |
| NM_002948    | RPL15     | 558  | 589  | 0.758600381071 |               |
| NM_002948    | RPL15     | 675  | 724  | 3.75860687621  |               |
| NM_001184781 | DGCR2     | 396  | 438  | 9.47113274251  |               |
| NM_001184781 | DGCR2     | 3501 | 3561 | 8.98168831517  |               |
| NM_001184781 | DGCR2     | 473  | 516  | 9.47113274251  |               |
| NM_001184781 | DGCR2     | 1147 | 1188 | 7.66360407013  |               |
| NM_001184781 | DGCR2     | 3133 | 3166 | 8.57963861107  |               |
| NM_001184781 | DGCR2     | 3818 | 3901 | 8.98570591534  |               |
| NM_031426    | AIF1L     | 126  | 148  | 7.58075733743  |               |
| NM_138809    | CMBL      | 3304 | 3327 | 7.51961591491  |               |
| NM_001011551 | C1GALT1C1 |      | 757  | 834            | 8.52034224647 |
| NM_001011551 | C1GALT1C1 |      | 1054 | 1084           | 4.85124053637 |
| NM_001011551 | C1GALT1C1 |      | 981  | 1003           | 5.85124053637 |
| NM_014749    | KIAA0586  |      | 3250 | 3271           | 7.41785967202 |
| NM_014747    | RIMS3     | 78   | 107  | 9.06397638005  |               |
| NM_014742    | TM9SF4    | 1446 | 1519 | 7.91125327053  |               |
| NM_014742    | TM9SF4    | 1172 | 1224 | 7.3966800977   |               |
| NM_014742    | TM9SF4    | 1578 | 1646 | 7.3966800977   |               |
| NM_014742    | TM9SF4    | 3369 | 3429 | 5.58932517563  |               |
| NM_014742    | TM9SF4    | 793  | 836  | 6.82711406114  |               |
| NM_014742    | TM9SF4    | 3550 | 3570 | 5.50518596625  |               |
| NM_014742    | TM9SF4    | 1947 | 1991 | 7.58932493972  |               |
| NM_014742    | TM9SF4    | 1010 | 1061 | 5.50518596625  |               |
| NM_014742    | TM9SF4    | 2134 | 2187 | 6.91107952021  |               |
| NM_014742    | TM9SF4    | 1998 | 2034 | 5.58931844458  |               |
| NM_014742    | TM9SF4    | 523  | 553  | 6.58932493972  |               |
| NM_014742    | TM9SF4    | 2068 | 2094 | 6.58915142532  |               |
| NM_014742    | TM9SF4    | 1416 | 1441 | 5.58915142532  |               |
| NM_014742    | TM9SF4    | 341  | 406  | 7.58932517563  |               |
| NM_014742    | TM9SF4    | 1727 | 1805 | 7.17428767636  |               |
| NM_014742    | TM9SF4    | 560  | 655  | 7.17428767636  |               |
| NM_014742    | TM9SF4    | 1087 | 1164 | 8.17428767636  |               |
| NM_014742    | TM9SF4    | 701  | 788  | 8.04875679428  |               |
| NM_014742    | TM9SF4    | 839  | 1004 | 8.91125327053  |               |

|              |          |      |      |                   |
|--------------|----------|------|------|-------------------|
| NM_014742    | TM9SF4   | 1240 | 1392 | 7.75925017708     |
| NM_005234    | NR2F6    | 259  | 320  | 9.88672321584     |
| NM_005232    | EPHA1    | 1740 | 1760 | 7.83270815001     |
| NM_032772    | ZNF503   | 1060 | 1091 | 10.0045211571     |
| NM_032779    | CCDC142  | 1139 | 1160 | 11.6805060984     |
| NM_032779    | CCDC142  | 1265 | 1303 | 11.7644715575     |
| NM_001077489 | GNAS     | 701  | 739  | 2.09854531638     |
| NM_001077489 | GNAS     | 1383 | 1462 | 1.67949021694     |
| NM_001077489 | GNAS     | 798  | 886  | 2.09837156607     |
| NM_001077484 | SLC38A1  | 2192 | 2240 | 8.29277223365     |
| NM_001077484 | SLC38A1  | 1381 | 1424 | 9.37691144304     |
| NM_001077484 | SLC38A1  | 2099 | 2158 | 7.9618672127      |
| NM_001077484 | SLC38A1  | 1827 | 1868 | 9.54281884431     |
| NM_001077484 | SLC38A1  | 431  | 450  | 7.29277223365     |
| NM_022756    | MEAF6    | 4178 | 4216 | 3.62062963046     |
| NM_015161    | ARL6IP1  | 107  | 188  | 6.80616687099     |
| NM_015161    | ARL6IP1  | 465  | 527  | 8.12809497343     |
| NM_015161    | ARL6IP1  | 718  | 755  | 6.80599312823     |
| NM_015161    | ARL6IP1  | 399  | 449  | 6.80616687854     |
| NM_015161    | ARL6IP1  | 213  | 285  | 8.22120437782     |
| NM_015161    | ARL6IP1  | 539  | 605  | 6.80616687854     |
| NM_015164    | PLEKHM2  | 170  | 204  | 8.28141544581     |
| NM_001333    | CTSL2    | 650  | 707  | 9.33518008801     |
| NM_001333    | CTSL2    | 559  | 643  | 9.86569480471     |
| NM_001440    | EXTL3    | 146  | 171  | 7.69764184786     |
| NM_001448    | GPC4     | 1649 | 1685 | 12.9147403841     |
| NM_001164262 | PPIAL4F  | 531  | 564  | 9.34852964167     |
| NM_000313    | PROS1    | 1056 | 1107 | 5.9793414476      |
| NM_000313    | PROS1    | 1181 | 1229 | 6.56430418423     |
| NM_000313    | PROS1    | 1368 | 1423 | 6.30126977086     |
| NM_000313    | PROS1    | 926  | 963  | 5.56430394832     |
| NM_000313    | PROS1    | 1472 | 1521 | 7.30126977841     |
| NM_000312    | PROC     | 891  | 937  | 3.62695559151     |
| NM_000312    | PROC     | 248  | 300  | 5.43046666371     |
| NM_000312    | PROC     | 551  | 601  | 3.62311174165     |
| NM_000310    | PPT1     | 877  | 912  | 7.47359767665     |
| NM_000310    | PPT1     | 437  | 491  | 7.47360440771     |
| NM_000310    | PPT1     | 1021 | 1069 | 6.15167630527     |
| NM_000310    | PPT1     | 935  | 983  | 6.4736044077      |
| NM_000310    | PPT1     | 282  | 389  | 6.15167631281     |
| NM_000310    | PPT1     | 634  | 745  | 7.85211603096     |
| NM_030636    | EEDP1    | 2918 | 2940 | 8.97403988699     |
| NM_021227    | OSTC     | 148  | 198  | 4.80912407983     |
| NM_021227    | OSTC     | 312  | 339  | 3.72900247062     |
| NM_021228    | SCAF1    | 308  | 329  | 9.19852966997     |
| NM_138785    | C6orf72  | 767  | 793  | 5.71327138653     |
| NM_173514    | SLC38A9  | 1842 | 1872 | 9.88438006656     |
| NM_173514    | SLC38A9  | 1357 | 1388 | 7.88839743081     |
| NM_173517    | VKORC1L1 |      | 70   | 100 5.63475083938 |
| NM_003375    | VDAC2    | 956  | 992  | 3.12459890422     |

|              |         |      |      |                |
|--------------|---------|------|------|----------------|
| NM_139322    | ATRN    | 1668 | 1736 | 7.70064992911  |
| NM_139322    | ATRN    | 2959 | 2988 | 5.89312125674  |
| NM_139322    | ATRN    | 558  | 593  | 4.88927740688  |
| NM_139322    | ATRN    | 106  | 216  | 8.89329500706  |
| NM_139322    | ATRN    | 1119 | 1164 | 5.88927740688  |
| NM_004872    | TMEM59  | 990  | 1033 | 7.25310056761  |
| NM_004872    | TMEM59  | 681  | 734  | 3.93099872241  |
| NM_004870    | MPDU1   | 1521 | 1583 | 8.02310395359  |
| NM_004870    | MPDU1   | 863  | 911  | 8.60789943505  |
| NM_004870    | MPDU1   | 650  | 690  | 9.02310395359  |
| NM_012247    | SEPHS1  | 645  | 667  | 4.62676218806  |
| NM_001199671 | CALU    | 1028 | 1069 | 1.28583711811  |
| NM_001199671 | CALU    | 2055 | 2125 | 3.28583734648  |
| NM_001199671 | CALU    | 1412 | 1489 | 0.700874853305 |
| NM_001199671 | CALU    | 1673 | 1770 | 2.28583735403  |
| NM_001199671 | CALU    | 1145 | 1331 | 5.22443680936  |
| NM_001199671 | CALU    | 1499 | 1595 | 3.02280294819  |
| NM_000175    | GPI     | 314  | 354  | 5.1942470029   |
| NM_000175    | GPI     | 900  | 1007 | 5.77920973199  |
| NM_001170937 | FUS     | 712  | 782  | 4.99372447933  |
| NM_006435    | IFITM2  | 221  | 274  | 9.69283262186  |
| NM_006435    | IFITM2  | 324  | 377  | 9.27779513013  |
| NM_006435    | IFITM2  | 379  | 419  | 6.69265887909  |
| NM_001960    | EEF1D   | 933  | 1027 | 3.64101530599  |
| NM_001960    | EEF1D   | 1068 | 1118 | 2.74952117455  |
| NM_006430    | CCT4    | 795  | 854  | 3.0050911518   |
| NM_006432    | NPC2    | 470  | 503  | 8.05841079915  |
| NM_006432    | NPC2    | 170  | 223  | 5.73648270426  |
| NM_006432    | NPC2    | 642  | 695  | 10.2640622605  |
| NM_015478    | L3MBTL1 | 434  | 455  | 7.97531248073  |
| NM_001040446 | MTMR12  | 4067 | 4092 | 6.08698089224  |
| NM_014028    | OSTM1   | 801  | 837  | 7.74007895935  |
| NM_015374    | SUN2    | 1133 | 1180 | 7.78902370887  |
| NM_015374    | SUN2    | 1902 | 1951 | 4.78902370887  |
| NM_015374    | SUN2    | 920  | 965  | 8.11095853458  |
| NM_015374    | SUN2    | 1196 | 1238 | 6.36997534047  |
| NM_015374    | SUN2    | 1411 | 1466 | 7.11095180375  |
| NM_015374    | SUN2    | 2685 | 2778 | 7.37399294042  |
| NM_015374    | SUN2    | 666  | 735  | 6.37399294064  |
| NM_015374    | SUN2    | 597  | 657  | 6.789030204    |
| NM_018212    | ENAH    | 1054 | 1128 | 6.91133176951  |
| NM_018211    | RAVER2  | 4034 | 4055 | 9.66184161942  |
| NM_002203    | ITGA2   | 1267 | 1308 | 6.95005183584  |
| NM_002203    | ITGA2   | 2988 | 3017 | 8.03017344505  |
| NM_002203    | ITGA2   | 659  | 687  | 7.61915331003  |
| NM_002203    | ITGA2   | 577  | 608  | 8.27197993073  |
| NM_002203    | ITGA2   | 2501 | 2550 | 8.61915354595  |
| NM_002203    | ITGA2   | 1612 | 1646 | 7.61915354595  |
| NM_002203    | ITGA2   | 1449 | 1489 | 7.03017344505  |
| NM_002203    | ITGA2   | 2372 | 2440 | 9.61915354595  |

|              |          |      |      |               |               |
|--------------|----------|------|------|---------------|---------------|
| NM_032565    | EBPL     | 579  | 638  | 6.48173501987 |               |
| NM_032565    | EBPL     | 350  | 413  | 8.28926369225 |               |
| NM_032565    | EBPL     | 462  | 522  | 9.06687127091 |               |
| NM_004046    | ATP5A1   | 1496 | 1530 | 3.98561268135 |               |
| NM_004046    | ATP5A1   | 1349 | 1390 | 3.6636910816  |               |
| NM_004046    | ATP5A1   | 1279 | 1309 | 2.6635175672  |               |
| NM_004046    | ATP5A1   | 690  | 749  | 2.6635175672  |               |
| NM_033161    | SURF4    | 526  | 584  | 6.9353211906  |               |
| NM_033161    | SURF4    | 800  | 837  | 6.78331809715 |               |
| NM_033161    | SURF4    | 328  | 420  | 5.9353211906  |               |
| NM_033161    | SURF4    | 730  | 783  | 6.19835559643 |               |
| NM_033161    | SURF4    | 450  | 523  | 3.61339309571 |               |
| NM_001184796 | ESYT1    | 411  | 508  | 9.60241234914 |               |
| NM_001184796 | ESYT1    | 1063 | 1104 | 8.86544002392 |               |
| NM_001184796 | ESYT1    | 544  | 629  | 9.45040925569 |               |
| NM_001184796 | ESYT1    | 2042 | 2117 | 8.86544675497 |               |
| NM_001184796 | ESYT1    | 1966 | 2030 | 7.86544675475 |               |
| NM_001184796 | ESYT1    | 764  | 808  | 7.86544674742 |               |
| NM_001184796 | ESYT1    | 1650 | 1696 | 8.60241211322 |               |
| NM_001184796 | ESYT1    | 1116 | 1178 | 8.60241234914 |               |
| NM_001184796 | ESYT1    | 1197 | 1288 | 10.2804842542 |               |
| NM_001184796 | ESYT1    | 652  | 679  | 7.78130754559 |               |
| NM_001184796 | ESYT1    | 1342 | 1432 | 9.98092397239 |               |
| NM_001184796 | ESYT1    | 3120 | 3225 | 9.45040925569 |               |
| NM_001184796 | ESYT1    | 905  | 1018 | 9.73991587289 |               |
| NM_001184796 | ESYT1    | 1759 | 1832 | 7.27646665408 |               |
| NM_001099409 | EHBP1L1  | 3708 | 3739 | 8.02031774219 |               |
| NM_033386    | MICALL1  | 1160 | 1183 | 8.2362054834  |               |
| NM_001099406 | SLC39A6  | 1364 | 1434 | 6.27206477332 |               |
| NM_080476    | PIGU     | 1253 | 1311 | 6.86268237224 |               |
| NM_080476    | PIGU     | 1185 | 1214 | 6.27370227135 |               |
| NM_080476    | PIGU     | 764  | 826  | 6.85866477207 |               |
| NM_080476    | PIGU     | 337  | 371  | 7.86267564119 |               |
| NM_001128431 | SLC39A14 |      | 1152 | 1227          | 5.88781682752 |
| NM_001128431 | SLC39A14 |      | 1080 | 1140          | 6.71789182608 |
| NM_001128431 | SLC39A14 |      | 647  | 691           | 6.62478242169 |
| NM_001128431 | SLC39A14 |      | 442  | 475           | 4.71789159016 |
| NM_001128431 | SLC39A14 |      | 939  | 1080          | 7.24145378213 |
| NM_001128431 | SLC39A14 |      | 545  | 617           | 6.30285409088 |
| NM_001128431 | SLC39A14 |      | 717  | 772           | 6.03981992096 |
| NM_001128431 | SLC39A14 |      | 1439 | 1541          | 5.3028543268  |
| NM_001034852 | SMOC1    | 1485 | 1523 | 5.44002101515 |               |
| NM_001034852 | SMOC1    | 1163 | 1223 | 5.44002101515 |               |
| NM_004996    | ABCC1    | 3946 | 3993 | 7.23394483343 |               |
| NM_001784    | CD97     | 713  | 755  | 11.5216959272 |               |
| NM_001784    | CD97     | 1232 | 1271 | 10.5216956915 |               |
| NM_001784    | CD97     | 1308 | 1385 | 12.9811273101 |               |
| NM_001784    | CD97     | 2362 | 2413 | 12.1066584206 |               |
| NM_001784    | CD97     | 1008 | 1062 | 11.1064846778 |               |
| NM_001784    | CD97     | 1716 | 1790 | 12.6916209289 |               |



|              |         |      |      |               |
|--------------|---------|------|------|---------------|
| NM_001784    | CD97    | 2210 | 2271 | 11.102640828  |
| NM_001784    | CD97    | 1394 | 1453 | 10.5176783272 |
| NM_001164508 | NEB     | 4219 | 4241 | 12.9842564617 |
| NM_182646    | CPEB2   | 1048 | 1080 | 10.8391769753 |
| NM_182646    | CPEB2   | 1435 | 1461 | 10.8351593751 |
| NM_152280    | SYT11   | 929  | 1019 | 13.176303869  |
| NM_001024912 | CEACAM1 | 597  | 653  | 4.49985058166 |
| NM_001024912 | CEACAM1 | 1146 | 1175 | 5.00068060405 |
| NM_004667    | HERC2   | 5718 | 5756 | 8.06008636111 |
| NM_198310    | TTC8    | 1848 | 1869 | 8.4500819997  |
| NM_000784    | CYP27A1 | 969  | 1065 | 6.47784799151 |
| NM_004048    | B2M     | 48   | 129  | 5.92231680843 |
| NM_004048    | B2M     | 545  | 593  | 5.55974672149 |
| NM_004048    | B2M     | 598  | 672  | 5.33735430748 |
| NM_004048    | B2M     | 183  | 471  | 9.70658811737 |
| NM_016306    | DNAJB11 | 355  | 404  | 3.4756764763  |
| NM_016306    | DNAJB11 | 162  | 228  | 4.89071397579 |
| NM_016306    | DNAJB11 | 790  | 856  | 5.79760457141 |
| NM_016306    | DNAJB11 | 1016 | 1049 | 4.89070724475 |
| NM_016306    | DNAJB11 | 894  | 943  | 4.39153726714 |
| NM_016306    | DNAJB11 | 1268 | 1323 | 3.47566974547 |
| NM_016306    | DNAJB11 | 424  | 523  | 5.69806889786 |
| NM_016306    | DNAJB11 | 967  | 999  | 4.21263533963 |
| NM_016306    | DNAJB11 | 270  | 314  | 2.89054022548 |
| NM_016306    | DNAJB11 | 608  | 772  | 4.8907139758  |
| NM_016306    | DNAJB11 | 82   | 127  | 2.89070724475 |
| NM_015966    | ERGIC3  | 449  | 517  | 4.39834914804 |
| NM_015966    | ERGIC3  | 324  | 384  | 4.84580812501 |
| NM_015966    | ERGIC3  | 745  | 796  | 3.74627245146 |
| NM_015966    | ERGIC3  | 922  | 968  | 1.9389175294  |
| NM_015966    | ERGIC3  | 820  | 867  | 3.26084538837 |
| NM_015966    | ERGIC3  | 519  | 561  | 3.52388002257 |
| NM_015966    | ERGIC3  | 174  | 272  | 3.74627245146 |
| NM_015966    | ERGIC3  | 596  | 685  | 3.5238800299  |
| NM_015965    | NDUFA13 | 233  | 287  | 2.7241345799  |
| NM_015965    | NDUFA13 | 314  | 357  | 2.72430159917 |
| NM_015965    | NDUFA13 | 85   | 138  | 3.46126719333 |
| NM_172251    | MRPL54  | 287  | 306  | 4.91438119683 |
| NM_001032281 | TFPI    | 854  | 895  | 2.3467291511  |
| NM_001032281 | TFPI    | 543  | 605  | 3.08369498096 |
| NM_001032281 | TFPI    | 740  | 830  | 4.71596319668 |
| XM_929503    | OSTCP2  | 238  | 265  | 8.8076258074  |
| NM_031407    | HUWE1   | 4163 | 4226 | 6.64789592337 |
| NM_031157    | HNRNPA1 | 203  | 259  | 2.18279863693 |
| NM_031157    | HNRNPA1 | 1520 | 1587 | 1.17878103698 |
| NM_031157    | HNRNPA1 | 519  | 589  | 2.18279840124 |
| NM_014762    | DHCR24  | 1170 | 1246 | 4.8202971105  |
| NM_014762    | DHCR24  | 1032 | 1110 | 5.9578006418  |
| NM_014762    | DHCR24  | 462  | 504  | 5.9578006418  |
| NM_014762    | DHCR24  | 1328 | 1380 | 6.6682940246  |

|           |          |      |      |                   |
|-----------|----------|------|------|-------------------|
| NM_014762 | DHCR24   | 1526 | 1598 | 6.7462965366      |
| NM_014762 | DHCR24   | 387  | 456  | 5.9578006418      |
| NM_014762 | DHCR24   | 4000 | 4041 | 4.41422981377     |
| NM_014762 | DHCR24   | 3034 | 3097 | 5.30170634504     |
| NM_014762 | DHCR24   | 2658 | 2695 | 3.49435142298     |
| NM_014762 | DHCR24   | 2720 | 2784 | 3.49819527284     |
| NM_014762 | DHCR24   | 1254 | 1296 | 4.49836901561     |
| NM_014762 | DHCR24   | 888  | 1013 | 6.7462965366      |
| NM_014762 | DHCR24   | 2954 | 3014 | 5.30571721416     |
| NM_014762 | DHCR24   | 147  | 261  | 6.08333152388     |
| NM_014762 | DHCR24   | 1845 | 1960 | 5.49836902316     |
| NM_014762 | DHCR24   | 1408 | 1522 | 6.82029711805     |
| NM_014762 | DHCR24   | 1638 | 1724 | 5.82029711805     |
| NM_014762 | DHCR24   | 661  | 806  | 6.89068644594     |
| NM_014762 | DHCR24   | 504  | 624  | 7.08333152388     |
| NM_014765 | TOMM20   | 613  | 660  | 5.47845363019     |
| NM_014765 | TOMM20   | 548  | 611  | 4.58519508379     |
| NM_006098 | GNB2L1   | 664  | 733  | -0.0979349005912  |
| NM_032171 | CEP78    | 1122 | 1148 | 7.89638646685     |
| NM_018685 | ANLN     | 3398 | 3442 | 7.66241678799     |
| NM_018687 | C19orf80 |      | 279  | 349 7.90312389655 |
| NM_018687 | C19orf80 |      | 357  | 423 5.0116297651  |
| NM_018687 | C19orf80 |      | 166  | 254 6.90312389655 |
| NM_018687 | C19orf80 |      | 563  | 640 7.09576897449 |
| NM_032717 | AGPAT9   | 877  | 919  | 9.60802129742     |
| NM_032717 | AGPAT9   | 1486 | 1522 | 10.8264028496     |
| NM_183352 | SEC13    | 709  | 751  | 3.50069792848     |
| NM_015149 | RGL1     | 598  | 618  | 9.33584431351     |
| NM_170665 | ATP2A2   | 3183 | 3237 | 8.25050034483     |
| NM_170665 | ATP2A2   | 2550 | 2608 | 5.39251934971     |
| NM_170665 | ATP2A2   | 1883 | 1930 | 4.97747511937     |
| NM_170665 | ATP2A2   | 1645 | 1695 | 6.56244435115     |
| NM_170665 | ATP2A2   | 1568 | 1639 | 7.19987427176     |
| NM_170665 | ATP2A2   | 1782 | 1843 | 8.14740685187     |
| NM_170665 | ATP2A2   | 927  | 995  | 6.97748185043     |
| NM_170665 | ATP2A2   | 995  | 1031 | 6.3925193497      |
| NM_170665 | ATP2A2   | 3118 | 3156 | 5.38850174953     |
| NM_170665 | ATP2A2   | 614  | 656  | 5.71444071354     |
| NM_170665 | ATP2A2   | 3238 | 3277 | 6.19987426422     |
| NM_170665 | ATP2A2   | 3443 | 3564 | 8.14740685187     |
| NM_170665 | ATP2A2   | 2264 | 2365 | 8.09295906785     |
| NM_170665 | ATP2A2   | 76   | 131  | 4.89334264104     |
| NM_170665 | ATP2A2   | 563  | 614  | 5.38850174953     |
| NM_170665 | ATP2A2   | 2159 | 2186 | 4.30838014032     |
| NM_170665 | ATP2A2   | 2195 | 2231 | 5.30838014032     |
| NM_170665 | ATP2A2   | 2973 | 3013 | 4.97346425026     |
| NM_170665 | ATP2A2   | 1361 | 1397 | 4.97748161451     |
| NM_170665 | ATP2A2   | 2648 | 2753 | 8.39251934971     |
| NM_170665 | ATP2A2   | 2444 | 2521 | 7.19987427176     |
| NM_170665 | ATP2A2   | 1262 | 1313 | 4.89334264104     |

|              |           |      |      |                    |
|--------------|-----------|------|------|--------------------|
| NM_170665    | ATP2A2    | 3317 | 3440 | 7.97748185043      |
| NM_170665    | ATP2A2    | 3014 | 3106 | 4.97748185043      |
| NM_170665    | ATP2A2    | 1458 | 1541 | 6.85195096834      |
| NM_170665    | ATP2A2    | 2854 | 2953 | 5.97748185043      |
| NM_170665    | ATP2A2    | 1215 | 1249 | 3.38850174953      |
| NM_170665    | ATP2A2    | 1105 | 1197 | 6.19987427176      |
| NM_001178115 | ZNF185    | 1403 | 1422 | 12.220544931       |
| NM_018235    | CNDP2     | 177  | 223  | 6.52560618736      |
| NM_001135208 | FKBP2     | 366  | 407  | 7.98007051932      |
| NM_001135208 | FKBP2     | 515  | 562  | 6.89994891011      |
| NM_021203    | SRPRB     | 1002 | 1131 | 10.0419059673      |
| NM_021203    | SRPRB     | 734  | 772  | 6.79397845362      |
| NM_021203    | SRPRB     | 498  | 533  | 8.60132664485      |
| NM_021203    | SRPRB     | 773  | 801  | 5.70983924446      |
| NM_001146158 | MOGS      | 356  | 404  | 7.8360349128       |
| NM_001146158 | MOGS      | 2082 | 2114 | 7.42996761608      |
| NM_001146158 | MOGS      | 1271 | 1316 | 5.51410682546      |
| NM_001146158 | MOGS      | 1399 | 1434 | 7.0149301168       |
| NM_001146158 | MOGS      | 627  | 666  | 7.09505172601      |
| NM_001146158 | MOGS      | 185  | 245  | 7.09505172601      |
| NM_001146158 | MOGS      | 1604 | 1658 | 7.83201732018      |
| NM_001146158 | MOGS      | 1929 | 2012 | 6.51393307515      |
| NM_001146152 | CYP51A1   | 927  | 974  | 7.16072873195      |
| NM_001146152 | CYP51A1   | 442  | 501  | 6.57576623878      |
| NM_001146152 | CYP51A1   | 645  | 698  | 7.89769433366      |
| NM_001146152 | CYP51A1   | 161  | 202  | 6.31273183294      |
| NM_001146152 | CYP51A1   | 977  | 1100 | 9.63465992783      |
| NM_001146152 | CYP51A1   | 860  | 891  | 5.99080373051      |
| NM_001146152 | CYP51A1   | 260  | 293  | 5.57559248846      |
| NM_001146152 | CYP51A1   | 537  | 605  | 6.79815866011      |
| NM_001146152 | CYP51A1   | 774  | 850  | 7.99080373805      |
| NM_001146152 | CYP51A1   | 1124 | 1250 | 7.99080373805      |
| NM_021064    | HIST1H2AG |      | 34   | 71 10.3893662773   |
| NM_001142676 | CHID1     | 673  | 759  | 8.40167789925      |
| NM_001001664 | SPOPL     | 85   | 106  | 6.36475739081      |
| NM_002555    | SLC22A18  |      | 1293 | 1369 12.0938168645 |
| NM_002127    | HLA-G     | 725  | 754  | 8.50431758322      |
| NM_002127    | HLA-G     | 839  | 888  | 7.50432431428      |
| NM_002127    | HLA-G     | 893  | 930  | 9.08928680745      |
| NM_002127    | HLA-G     | 933  | 991  | 9.08928680745      |
| NM_000374    | UROD      | 560  | 605  | 6.19817705445      |
| NM_133264    | WIPF2     | 40   | 91   | 8.46910858973      |
| NM_001166133 | FRAS1     | 2459 | 2524 | 10.7168806778      |
| NM_001166133 | FRAS1     | 1775 | 1814 | 10.3543105982      |
| NM_001166133 | FRAS1     | 3660 | 3706 | 9.04777896774      |
| NM_001166133 | FRAS1     | 1379 | 1431 | 9.54293807623      |
| NM_000371    | TTR       | 170  | 208  | 0.387403447337     |
| NM_003312    | TST       | 666  | 698  | 6.61930693913      |
| NM_153615    | RGL4      | 159  | 177  | 10.9041912574      |
| NM_004859    | CLTC      | 2268 | 2306 | 5.31307243854      |

|              |         |      |      |                 |
|--------------|---------|------|------|-----------------|
| NM_004859    | CLTC    | 759  | 814  | 5.39319404775   |
| NM_004859    | CLTC    | 915  | 962  | 4.6602393227    |
| NM_004859    | CLTC    | 2765 | 2795 | 3.99114434365   |
| NM_004859    | CLTC    | 3413 | 3453 | 5.39319404775   |
| NM_004859    | CLTC    | 1289 | 1322 | 4.66024605376   |
| NM_004859    | CLTC    | 3197 | 3247 | 5.39720491687   |
| NM_004859    | CLTC    | 3852 | 3901 | 2.99114434365   |
| NM_004859    | CLTC    | 1802 | 1852 | 5.88263174404   |
| NM_004859    | CLTC    | 2867 | 2925 | 4.07510980272   |
| NM_004859    | CLTC    | 1704 | 1770 | 4.66007230344   |
| NM_004859    | CLTC    | 3705 | 3778 | 6.39721164792   |
| NM_004501    | HNRNPU  | 601  | 698  | 4.52210138251   |
| NM_004501    | HNRNPU  | 1644 | 1688 | 4.15952457208   |
| NM_004501    | HNRNPU  | 2264 | 2311 | 2.93713215074   |
| NM_004501    | HNRNPU  | 1311 | 1359 | 3.67410424004   |
| NM_004501    | HNRNPU  | 1393 | 1454 | 3.67410424004   |
| NM_004852    | ONECUT2 | 153  | 202  | 11.1622512777   |
| NM_000196    | HSD11B2 | 53   | 77   | 10.0277872501   |
| NM_000199    | SGSH    | 809  | 868  | 10.7845537234   |
| NM_000998    | RPL37A  | 88   | 114  | -0.975650149749 |
| NM_000998    | RPL37A  | 208  | 289  | 1.19595190088   |
| NM_001005862 | ERBB2   | 3144 | 3163 | 6.385046097     |
| NM_001005862 | ERBB2   | 3058 | 3120 | 5.79623974642   |
| NM_001005862 | ERBB2   | 3190 | 3241 | 7.60761226865   |
| NM_001005862 | ERBB2   | 2786 | 2829 | 7.38521983977   |
| NM_001005862 | ERBB2   | 3494 | 3547 | 7.11816784131   |
| NM_000990    | RPL27A  | 619  | 684  | 2.18382560507   |
| NM_000997    | RPL37   | 239  | 298  | 1.99129291929   |
| NM_000997    | RPL37   | 91   | 137  | -0.012724680657 |
| NM_000997    | RPL37   | 139  | 215  | 2.45072453815   |
| NM_000996    | RPL35A  | 423  | 453  | 1.66025826354   |
| NM_000996    | RPL35A  | 25   | 88   | 2.39722362201   |
| NM_002047    | GARS    | 516  | 554  | 3.63626660604   |
| NM_002046    | GAPDH   | 347  | 391  | 1.86435058608   |
| NM_002046    | GAPDH   | 545  | 594  | -0.131805564067 |
| NM_002046    | GAPDH   | 686  | 782  | 3.45333068697   |
| NM_002046    | GAPDH   | 198  | 265  | -0.135649413922 |
| NM_002265    | KPNB1   | 1396 | 1441 | 3.67660968183   |
| NM_002266    | KPNA2   | 1459 | 1513 | 3.36198147589   |
| NM_002266    | KPNA2   | 467  | 506  | 4.94694397661   |
| NM_015365    | AMMECR1 | 300  | 328  | 10.8938857854   |
| NM_001025234 | TSPAN4  | 541  | 580  | 9.19210048249   |
| NM_001025234 | TSPAN4  | 790  | 867  | 9.19210048271   |
| NM_018279    | TMEM19  | 1354 | 1410 | 9.87111458992   |
| NM_001145408 | NONO    | 1634 | 1767 | 5.63599637817   |
| NM_015317    | PUM2    | 4669 | 4688 | 5.57954423207   |
| NM_012339    | TSPAN15 | 603  | 663  | 11.4961872573   |
| NM_014409    | TAF5L   | 13   | 42   | 8.42988860636   |
| NM_005065    | SEL1L   | 1131 | 1199 | 7.5072656923    |
| NM_005065    | SEL1L   | 2070 | 2098 | 5.77030682164   |

|           |          |      |      |               |               |
|-----------|----------|------|------|---------------|---------------|
| NM_005065 | SEL1L    | 129  | 159  | 5.6861676198  |               |
| NM_005065 | SEL1L    | 536  | 590  | 6.50727218743 |               |
| NM_005065 | SEL1L    | 441  | 477  | 5.77030659327 |               |
| NM_005065 | SEL1L    | 1246 | 1288 | 4.18132672829 |               |
| NM_005065 | SEL1L    | 1755 | 1800 | 4.18132672829 |               |
| NM_005065 | SEL1L    | 2249 | 2279 | 5.6861676198  |               |
| NM_005065 | SEL1L    | 2120 | 2164 | 6.18534409255 |               |
| NM_005065 | SEL1L    | 848  | 927  | 7.18534432847 |               |
| NM_005063 | SCD      | 981  | 1058 | 7.44031843063 |               |
| NM_005063 | SCD      | 403  | 463  | 5.11839033574 |               |
| NM_005063 | SCD      | 1394 | 1446 | 4.9484653343  |               |
| NM_005063 | SCD      | 1517 | 1592 | 6.47202729036 |               |
| NM_005063 | SCD      | 4445 | 4492 | 4.53342110397 |               |
| NM_005063 | SCD      | 4806 | 4871 | 3.5334275991  |               |
| NM_005063 | SCD      | 4330 | 4375 | 3.44928862564 |               |
| NM_005063 | SCD      | 673  | 731  | 3.94845860325 |               |
| NM_005063 | SCD      | 246  | 296  | 4.27021967887 |               |
| NM_005063 | SCD      | 3136 | 3194 | 3.53342110397 |               |
| NM_005063 | SCD      | 4102 | 4157 | 4.27039342918 |               |
| NM_005063 | SCD      | 1062 | 1170 | 7.56317517842 |               |
| NM_005063 | SCD      | 4631 | 4690 | 3.5334275991  |               |
| NM_005063 | SCD      | 4248 | 4290 | 4.27039319327 |               |
| NM_005063 | SCD      | 1452 | 1494 | 2.94846509838 |               |
| NM_005063 | SCD      | 568  | 658  | 5.11839033574 |               |
| NM_005063 | SCD      | 2774 | 2829 | 3.94829158398 |               |
| NM_005063 | SCD      | 1718 | 1749 | 2.94845860325 |               |
| NM_005063 | SCD      | 1173 | 1386 | 7.9257452578  |               |
| NM_005063 | SCD      | 3868 | 3946 | 3.94846532675 |               |
| NM_005063 | SCD      | 808  | 965  | 7.56317517842 |               |
| NM_005069 | SIM2     | 1747 | 1770 | 12.9844096247 |               |
| NM_001810 | CENPB    | 1759 | 1831 | 6.4999536629  |               |
| NM_020928 | ZSWIM6   | 48   | 78   | 9.72364324693 |               |
| NM_001101 | ACTB     | 601  | 675  | 4.89944806047 |               |
| NM_001101 | ACTB     | 915  | 1007 | 4.20757035583 |               |
| NM_001101 | ACTB     | 384  | 435  | 2.82905873258 |               |
| NM_001101 | ACTB     | 198  | 254  | 2.50713063769 |               |
| NM_001101 | ACTB     | 278  | 373  | 3.09209313841 |               |
| NM_001101 | ACTB     | 1341 | 1400 | 2.50713063747 |               |
| NM_001101 | ACTB     | 482  | 552  | 4.09209313841 |               |
| NM_001101 | ACTB     | 697  | 765  | 3.50713063769 |               |
| NM_001101 | ACTB     | 1083 | 1127 | 1.42299142831 |               |
| NM_001101 | ACTB     | 36   | 133  | 3.31448555975 |               |
| NM_001101 | ACTB     | 1137 | 1273 | 3.09209313841 |               |
| NM_016142 | HSD17B12 |      | 589  | 652           | 4.19432688559 |
| NM_016142 | HSD17B12 |      | 1098 | 1161          | 4.77928265526 |
| NM_016142 | HSD17B12 |      | 454  | 502           | 5.4321157711  |
| NM_016142 | HSD17B12 |      | 731  | 849           | 7.00168180765 |
| NM_016142 | HSD17B12 |      | 987  | 1071          | 5.77928915039 |
| NM_198335 | GANAB    | 2453 | 2489 | 7.3943791828  |               |
| NM_198335 | GANAB    | 2543 | 2600 | 7.58702426074 |               |

|           |          |      |      |               |               |
|-----------|----------|------|------|---------------|---------------|
| NM_198335 | GANAB    | 2627 | 2669 | 7.3943791828  |               |
| NM_198335 | GANAB    | 1109 | 1173 | 9.1105862168  |               |
| NM_198335 | GANAB    | 1915 | 1970 | 8.75694926218 |               |
| NM_198335 | GANAB    | 2416 | 2452 | 7.90895235541 |               |
| NM_198335 | GANAB    | 755  | 812  | 6.08784755208 |               |
| NM_198335 | GANAB    | 2741 | 2810 | 8.17198676146 |               |
| NM_198335 | GANAB    | 2711 | 2740 | 4.58701752969 |               |
| NM_198335 | GANAB    | 2818 | 2871 | 8.3943791828  |               |
| NM_198335 | GANAB    | 600  | 687  | 8.97934168352 |               |
| NM_198335 | GANAB    | 1877 | 1915 | 6.58702425319 |               |
| NM_198335 | GANAB    | 2207 | 2254 | 7.17198676146 |               |
| NM_198335 | GANAB    | 376  | 464  | 8.49391485635 |               |
| NM_198335 | GANAB    | 2018 | 2148 | 9.54122057113 |               |
| NM_198335 | GANAB    | 1033 | 1107 | 8.75694926218 |               |
| NM_198335 | GANAB    | 478  | 591  | 9.44500525587 |               |
| NM_198335 | GANAB    | 1770 | 1858 | 7.3943791828  |               |
| NM_198335 | GANAB    | 305  | 363  | 4.58300666057 |               |
| NM_198335 | GANAB    | 2877 | 3019 | 9.1105862168  |               |
| NM_198335 | GANAB    | 1177 | 1542 | 11.505887498  |               |
| NM_198335 | GANAB    | 1567 | 1725 | 9.67448710199 |               |
| NM_198335 | GANAB    | 835  | 1019 | 10.1719867615 |               |
| NM_198335 | GANAB    | 124  | 256  | 7.3943791828  |               |
| NM_017814 | TMEM161A |      | 1175 | 1207          | 11.784097847  |
| NM_017814 | TMEM161A |      | 1357 | 1380          | 11.0218869684 |
| NM_017814 | TMEM161A |      | 73   | 108           | 9.78008048274 |
| NM_017814 | TMEM161A |      | 461  | 503           | 10.784097847  |
| NM_017814 | TMEM161A |      | 1214 | 1273          | 11.5874354048 |
| NM_017814 | TMEM161A |      | 360  | 422           | 11.1060194467 |
| NM_017814 | TMEM161A |      | 837  | 883           | 11.0218869684 |
| NM_017814 | TMEM161A |      | 291  | 357           | 10.7839243326 |
| NM_017814 | TMEM161A |      | 678  | 790           | 12.591453005  |
| NM_017814 | TMEM161A |      | 966  | 1041          | 11.3690605836 |
| NM_017813 | IMPAD1   | 201  | 238  | 6.94726257967 |               |
| NM_015949 | GET4     | 567  | 626  | 8.79371549007 |               |
| NM_004563 | PCK2     | 59   | 81   | 4.40861046483 |               |
| NM_015946 | PELO     | 174  | 193  | 5.85724571325 |               |
| NM_015946 | PELO     | 271  | 334  | 6.52634742335 |               |
| NM_138426 | GLCCI1   | 427  | 450  | 11.1975826421 |               |
| NM_198591 | BSG      | 394  | 434  | 3.37992403044 |               |
| NM_198591 | BSG      | 555  | 625  | 5.5500227822  |               |
| NM_198591 | BSG      | 470  | 546  | 5.83952939939 |               |
| NM_198591 | BSG      | 1340 | 1392 | 3.60248996618 |               |
| NM_198591 | BSG      | 302  | 367  | 3.11706337492 |               |
| NM_198591 | BSG      | 1458 | 1500 | 1.79111767986 |               |
| NM_198591 | BSG      | 694  | 760  | 4.96506028148 |               |
| NM_198591 | BSG      | 1249 | 1288 | 3.60248347104 |               |
| NM_198591 | BSG      | 760  | 938  | 6.43899146981 |               |
| NM_024330 | SLC27A3  | 527  | 577  | 11.7351849924 |               |
| NM_024330 | SLC27A3  | 2024 | 2052 | 10.6550633832 |               |
| NM_024847 | TMC7     | 1616 | 1700 | 9.05528937158 |               |

|              |         |      |      |               |
|--------------|---------|------|------|---------------|
| NM_024334    | TMEM43  | 447  | 478  | 7.77723445725 |
| NM_024334    | TMEM43  | 60   | 79   | 7.69309524787 |
| NM_024334    | TMEM43  | 979  | 1018 | 8.18825435636 |
| NM_178862    | STT3B   | 1937 | 1974 | 7.94090747186 |
| NM_178862    | STT3B   | 1623 | 1672 | 8.13355255002 |
| NM_178862    | STT3B   | 1336 | 1416 | 9.22101539127 |
| NM_178865    | SERINC2 | 754  | 835  | 9.43767246336 |
| NM_178865    | SERINC2 | 613  | 677  | 9.43767246336 |
| NM_178865    | SERINC2 | 405  | 435  | 6.9780670944  |
| NM_178865    | SERINC2 | 1380 | 1483 | 8.56320334544 |
| NM_001078175 | SLC29A1 | 1946 | 2041 | 10.3506373046 |
| NM_001078175 | SLC29A1 | 1437 | 1490 | 9.93542605503 |
| NM_000689    | ALDH1A1 | 1714 | 1765 | 6.11211192091 |
| NM_000689    | ALDH1A1 | 1104 | 1188 | 5.7535594417  |
| NM_000689    | ALDH1A1 | 1305 | 1390 | 4.52714942019 |
| NM_006579    | EBP     | 782  | 829  | 7.77272966959 |
| NM_006579    | EBP     | 427  | 471  | 7.28729611136 |
| NM_006579    | EBP     | 295  | 326  | 6.54631964808 |
| NM_006579    | EBP     | 199  | 273  | 8.42480636595 |
| NM_006579    | EBP     | 343  | 426  | 8.13529974897 |
| NM_006579    | EBP     | 621  | 777  | 9.66581446567 |
| NM_003051    | SLC16A1 | 1413 | 1520 | 6.43007395359 |
| NM_003051    | SLC16A1 | 783  | 854  | 5.65246637493 |
| NM_003051    | SLC16A1 | 1526 | 1579 | 5.65246637493 |
| NM_003051    | SLC16A1 | 623  | 668  | 6.43007395359 |
| NM_003051    | SLC16A1 | 998  | 1045 | 3.8410938527  |
| NM_003051    | SLC16A1 | 1260 | 1339 | 4.84511145287 |
| NM_003051    | SLC16A1 | 698  | 772  | 6.54555117101 |
| NM_003051    | SLC16A1 | 1157 | 1212 | 5.43006722254 |
| NM_003051    | SLC16A1 | 1795 | 1834 | 5.42605635342 |
| NM_003051    | SLC16A1 | 855  | 971  | 5.65246637493 |
| NM_003051    | SLC16A1 | 1589 | 1647 | 5.16703954754 |
| NM_006575    | MAP4K5  | 65   | 95   | 5.84516087171 |
| NM_001197319 | CLEC2D  | 894  | 939  | 9.09156645328 |
| NM_002906    | RDX     | 1455 | 1494 | 4.19703516448 |
| NM_002901    | RCN1    | 1022 | 1088 | 6.76453409476 |
| NM_002901    | RCN1    | 785  | 822  | 6.09543238466 |
| NM_002901    | RCN1    | 548  | 663  | 7.9869265161  |
| NM_002901    | RCN1    | 851  | 959  | 8.08646218965 |
| NM_002902    | RCN2    | 432  | 463  | 2.72157924688 |
| NM_002902    | RCN2    | 590  | 645  | 4.30654847866 |
| NM_002902    | RCN2    | 380  | 432  | 3.71756837776 |
| NM_001190836 | DCTN1   | 1553 | 1592 | 5.00137628007 |
| NM_005022    | PFN1    | 576  | 652  | 3.58551337472 |
| NM_005022    | PFN1    | 711  | 773  | 5.39304204709 |
| NM_005022    | PFN1    | 866  | 972  | 5.75561212648 |
| NM_031283    | TCF7L1  | 236  | 277  | 11.8868717559 |
| NM_032737    | LMNB2   | 610  | 679  | 7.72081714629 |
| NM_001111019 | NAV2    | 5246 | 5274 | 6.20062409362 |
| NM_015127    | CLCC1   | 749  | 796  | 9.3036334776  |

|              |          |       |       |                    |
|--------------|----------|-------|-------|--------------------|
| NM_015127    | CLCC1    | 940   | 989   | 7.49226096292      |
| NM_015125    | CIC      | 105   | 199   | 9.9013509413       |
| NM_033280    | SEC11C   | 470   | 509   | 2.66802374666      |
| NM_001031696 | PLD3     | 1211  | 1273  | 9.83906196907      |
| NM_001031696 | PLD3     | 1949  | 2009  | 8.35363490599      |
| NM_001031696 | PLD3     | 839   | 907   | 8.83906196907      |
| NM_001031696 | PLD3     | 1035  | 1165  | 10.7865945492      |
| NM_001031696 | PLD3     | 1746  | 1840  | 10.1191698883      |
| NM_001031696 | PLD3     | 1652  | 1731  | 10.2796345605      |
| NM_001031696 | PLD3     | 739   | 819   | 9.35363514168      |
| NM_001031696 | PLD3     | 1484  | 1619  | 10.2016320485      |
| NM_001031696 | PLD3     | 628   | 686   | 8.3536351419       |
| NM_001031696 | PLD3     | 464   | 615   | 9.83906196907      |
| NM_001031696 | PLD3     | 912   | 998   | 8.83906196907      |
| NM_001031696 | PLD3     | 1297  | 1476  | 10.7321467652      |
| NM_181836    | TMED7    | 845   | 875   | 7.79659344095      |
| NM_181836    | TMED7    | 220   | 296   | 5.4708214962       |
| NM_001376    | DYNC1H1  | 8665  | 8730  | 6.05885863027      |
| NM_001376    | DYNC1H1  | 4011  | 4056  | 5.47389612955      |
| NM_001376    | DYNC1H1  | 8575  | 8615  | 5.39377452034      |
| NM_001376    | DYNC1H1  | 13437 | 13484 | 6.4777399794       |
| NM_001376    | DYNC1H1  | 6125  | 6177  | 5.39377452034      |
| NM_001376    | DYNC1H1  | 2228  | 2270  | 5.47389612955      |
| NM_001376    | DYNC1H1  | 9422  | 9451  | 6.39377452034      |
| NM_001376    | DYNC1H1  | 4334  | 4378  | 5.39377452034      |
| NM_001376    | DYNC1H1  | 13215 | 13297 | 5.4777399794       |
| NM_001376    | DYNC1H1  | 4536  | 4598  | 7.06270248012      |
| NM_001376    | DYNC1H1  | 12275 | 12351 | 6.79983509355      |
| NM_001376    | DYNC1H1  | 11889 | 11966 | 5.97873702106      |
| NM_001375    | DNASE2   | 282   | 336   | 11.5171218993      |
| NM_001375    | DNASE2   | 1054  | 1111  | 9.93198564829      |
| NM_022068    | PIEZ02   | 1722  | 1756  | 6.71584380845      |
| NM_022064    | RNF123   | 738   | 782   | 7.7671499008       |
| NM_021267    | CERS1    | 2291  | 2336  | 10.7334538132      |
| NM_000354    | SERPINA7 |       | 372   | 411 6.28330961567  |
| NM_000354    | SERPINA7 |       | 787   | 808 4.61420814149  |
| NM_000354    | SERPINA7 |       | 1097  | 1163 6.86827235231 |
| NM_000428    | LTBP2    | 5694  | 5765  | 14.5166079088      |
| NM_000359    | TGM1     | 1941  | 1961  | 8.96459862383      |
| NM_000358    | TGFBI    | 894   | 984   | 7.3249767795       |
| NM_000358    | TGFBI    | 361   | 393   | 4.38285657499      |
| NM_000358    | TGFBI    | 1283  | 1326  | 6.63692078581      |
| NM_000358    | TGFBI    | 1722  | 1773  | 5.92642740301      |
| NM_000358    | TGFBI    | 298   | 332   | 4.05195827754      |
| NM_000358    | TGFBI    | 1789  | 1874  | 5.05195828509      |
| NM_000358    | TGFBI    | 2133  | 2183  | 5.92642740301      |
| NM_000358    | TGFBI    | 2266  | 2299  | 3.4629781842       |
| NM_000358    | TGFBI    | 2336  | 2380  | 4.46698905332      |
| NM_000358    | TGFBI    | 466   | 568   | 6.05195828509      |
| NM_000358    | TGFBI    | 616   | 659   | 4.78892387926      |



|           |          |      |      |                   |
|-----------|----------|------|------|-------------------|
| NM_000358 | TGFBI    | 2473 | 2509 | 3.38285657499     |
| NM_000358 | TGFBI    | 1338 | 1421 | 5.27435070643     |
| NM_000358 | TGFBI    | 1449 | 1545 | 6.92642740301     |
| NM_000358 | TGFBI    | 113  | 215  | 6.16743550251     |
| NM_000358 | TGFBI    | 1952 | 2116 | 7.67644915        |
| NM_000358 | TGFBI    | 398  | 453  | 6.92642740301     |
| NM_000358 | TGFBI    | 683  | 831  | 7.46699578437     |
| NM_000358 | TGFBI    | 1004 | 1194 | 7.99055774043     |
| NM_000358 | TGFBI    | 1558 | 1706 | 7.27435070643     |
| NM_000358 | TGFBI    | 1876 | 1940 | 3.46698905332     |
| NM_006816 | LMAN2    | 326  | 411  | 6.23852518816     |
| NM_006816 | LMAN2    | 858  | 981  | 7.06860018672     |
| NM_006816 | LMAN2    | 459  | 521  | 4.65356267989     |
| NM_006816 | LMAN2    | 1192 | 1271 | 5.3905282816      |
| NM_006816 | LMAN2    | 688  | 753  | 4.06860017917     |
| NM_006815 | TMED2    | 108  | 159  | 2.39643719707     |
| NM_006815 | TMED2    | 32   | 69   | 1.81147493227     |
| NM_003334 | UBA1     | 3068 | 3101 | 5.41669676991     |
| NM_006215 | SERPINA4 |      | 653  | 733 8.52705430677 |
| NM_145312 | ZNF485   | 1866 | 1909 | 12.0129471539     |
| NM_006744 | RBP4     | 46   | 135  | 3.76480414069     |
| NM_006744 | RBP4     | 705  | 738  | 0.594879139025    |
| NM_006744 | RBP4     | 875  | 906  | -0.409138460926   |
| NM_006744 | RBP4     | 160  | 221  | 3.17984163997     |
| NM_006744 | RBP4     | 430  | 546  | 4.40223406131     |
| NM_006744 | RBP4     | 226  | 270  | 1.59470538893     |
| NM_006744 | RBP4     | 271  | 423  | 5.26730448122     |
| NM_006744 | RBP4     | 561  | 682  | 4.17984163997     |
| NM_006749 | SLC20A2  | 1268 | 1290 | 7.88553877799     |
| NM_004522 | KIF5C    | 4301 | 4321 | 10.4173423551     |
| NM_020132 | AGPAT3   | 591  | 647  | 3.82083907047     |
| NM_004528 | MGST3    | 698  | 738  | 8.10077920477     |
| NM_005610 | RBBP4    | 1024 | 1078 | 6.94729597322     |
| NM_172351 | CD46     | 332  | 366  | 8.07968852142     |
| NM_172351 | CD46     | 1130 | 1187 | 6.37925553433     |
| NM_172351 | CD46     | 603  | 631  | 6.7010098789      |
| NM_172351 | CD46     | 700  | 739  | 5.96020043488     |
| NM_172351 | CD46     | 242  | 287  | 6.96404428474     |
| NM_172351 | CD46     | 513  | 543  | 6.37523793416     |
| NM_172351 | CD46     | 811  | 845  | 6.70118362922     |
| NM_007293 | C4A      | 1272 | 1302 | 3.00493227863     |
| NM_007293 | C4A      | 2068 | 2125 | 4.67402725769     |
| NM_007293 | C4A      | 2387 | 2489 | 7.33699900146     |
| NM_007293 | C4A      | 1500 | 1549 | 6.67403398874     |
| NM_007293 | C4A      | 3499 | 3546 | 5.08906475696     |
| NM_007293 | C4A      | 1829 | 1875 | 3.0888977377      |
| NM_007293 | C4A      | 5152 | 5203 | 4.67403398874     |
| NM_007293 | C4A      | 4286 | 4331 | 4.67403398873     |
| NM_007293 | C4A      | 545  | 619  | 4.0888977377      |
| NM_007293 | C4A      | 3432 | 3482 | 5.89642641008     |

|              |        |      |      |               |
|--------------|--------|------|------|---------------|
| NM_007293    | C4A    | 5089 | 5143 | 4.08907148801 |
| NM_007293    | C4A    | 4773 | 4814 | 5.0888977377  |
| NM_007293    | C4A    | 375  | 440  | 5.08505388785 |
| NM_007293    | C4A    | 1932 | 1978 | 3.08907148802 |
| NM_007293    | C4A    | 2595 | 2666 | 6.67403398874 |
| NM_007293    | C4A    | 2825 | 2917 | 5.67403398874 |
| NM_007293    | C4A    | 891  | 952  | 3.08907148047 |
| NM_007293    | C4A    | 4473 | 4633 | 6.89642641008 |
| NM_007293    | C4A    | 2721 | 2799 | 5.67403398852 |
| NM_001102416 | KNG1   | 410  | 454  | 9.87749298415 |
| NM_001102416 | KNG1   | 1014 | 1042 | 9.41806136551 |
| NM_001102416 | KNG1   | 1289 | 1316 | 8.00285011591 |
| NM_001102416 | KNG1   | 652  | 684  | 8.41806136529 |
| NM_001102416 | KNG1   | 1644 | 1690 | 8.41788761519 |
| NM_001102416 | KNG1   | 1221 | 1271 | 9.22541628735 |
| NM_001102416 | KNG1   | 769  | 832  | 9.58798636695 |
| NM_001102416 | KNG1   | 875  | 936  | 8.91888465685 |
| NM_001102416 | KNG1   | 1327 | 1377 | 6.41404376534 |
| NM_001102416 | KNG1   | 468  | 564  | 10.1185010837 |
| NM_003198    | TCEB3  | 1706 | 1730 | 6.46808805203 |
| NM_007032    | TRIOBP | 77   | 106  | 6.56816162775 |
| NM_001144    | AMFR   | 1222 | 1255 | 7.30423943461 |
| NM_005591    | MRE11A | 2946 | 2994 | 8.39430706329 |
| NM_015331    | NCSTN  | 1180 | 1262 | 7.60966790279 |
| NM_015331    | NCSTN  | 1591 | 1636 | 7.02470539452 |
| NM_015331    | NCSTN  | 2039 | 2101 | 7.0206878019  |
| NM_015331    | NCSTN  | 1949 | 1995 | 8.34663349674 |
| NM_015331    | NCSTN  | 1490 | 1565 | 5.02470540207 |
| NM_001145426 | CSDA   | 647  | 676  | 4.43336948875 |
| NM_012318    | LETM1  | 637  | 710  | 7.09598325848 |
| NM_005040    | PRCP   | 921  | 983  | 8.47177374213 |
| NM_005040    | PRCP   | 1479 | 1532 | 7.65066893858 |
| NM_001294    | CLPTM1 | 830  | 891  | 6.95486676756 |
| NM_001294    | CLPTM1 | 2165 | 2219 | 6.30278333993 |
| NM_001294    | CLPTM1 | 1867 | 1908 | 6.49543514892 |
| NM_001294    | CLPTM1 | 1007 | 1045 | 4.49543514892 |
| NM_001294    | CLPTM1 | 1638 | 1692 | 6.495434913   |
| NM_001294    | CLPTM1 | 1166 | 1214 | 4.99625844026 |
| NM_001294    | CLPTM1 | 340  | 374  | 5.41129593954 |
| NM_001294    | CLPTM1 | 526  | 637  | 7.8877525717  |
| NM_182685    | EFNA1  | 600  | 647  | 8.70901097732 |
| NM_182685    | EFNA1  | 519  | 557  | 6.94330248064 |
| NM_013995    | LAMP2  | 353  | 434  | 6.39010874542 |
| NM_013995    | LAMP2  | 1154 | 1209 | 7.19344606731 |
| NM_013995    | LAMP2  | 774  | 811  | 5.97507124592 |
| NM_013995    | LAMP2  | 443  | 479  | 7.7120368403  |
| NM_013995    | LAMP2  | 206  | 256  | 6.70801924013 |
| NM_013995    | LAMP2  | 575  | 606  | 4.3899349951  |
| NM_013995    | LAMP2  | 1420 | 1453 | 5.89093203676 |
| NM_013995    | LAMP2  | 866  | 916  | 7.19746366726 |

|              |          |      |      |                 |                 |
|--------------|----------|------|------|-----------------|-----------------|
| NM_013995    | LAMP2    | 676  | 708  | 5.3901085095    |                 |
| NM_013995    | LAMP2    | 1012 | 1084 | 6.39010874542   |                 |
| NM_001033047 | NPNT     | 941  | 975  | 11.0638315004   |                 |
| NM_013993    | DDR1     | 623  | 681  | 10.2537277076   |                 |
| NM_013993    | DDR1     | 2713 | 2747 | 9.33769316668   |                 |
| NM_013993    | DDR1     | 2308 | 2351 | 9.75290441605   |                 |
| NM_172037    | RDH10    | 1260 | 1319 | 10.3294140877   |                 |
| NM_172037    | RDH10    | 1113 | 1189 | 10.744458318    |                 |
| NM_001101648 | NPC1L1   | 797  | 850  | 11.1587742894   |                 |
| NM_001101648 | NPC1L1   | 1343 | 1395 | 10.07463508     |                 |
| NM_001101648 | NPC1L1   | 2592 | 2637 | 8.83683946342   |                 |
| NM_001101648 | NPC1L1   | 922  | 965  | 10.07463508     |                 |
| NM_001101648 | NPC1L1   | 1744 | 1774 | 8.75270698509   |                 |
| NM_001127    | AP1B1    | 935  | 1023 | 5.24715011891   |                 |
| NM_007355    | HSP90AB1 |      | 1561 | 1605            | -1.23693774018  |
| NM_007355    | HSP90AB1 |      | 884  | 959             | 0.43216373401   |
| NM_007355    | HSP90AB1 |      | 2111 | 2171            | 1.43215723888   |
| NM_007355    | HSP90AB1 |      | 1844 | 1898            | 2.30645933753   |
| NM_007355    | HSP90AB1 |      | 1361 | 1405            | 2.01712647065   |
| NM_007355    | HSP90AB1 |      | 987  | 1048            | 2.16912955655   |
| NM_007355    | HSP90AB1 |      | 1240 | 1287            | 0.428146369756  |
| NM_007355    | HSP90AB1 |      | 2180 | 2220            | -1.15297228111  |
| NM_007355    | HSP90AB1 |      | 373  | 419             | -0.15297228111  |
| NM_007355    | HSP90AB1 |      | 1772 | 1810            | -0.236937740176 |
| NM_007355    | HSP90AB1 |      | 419  | 458             | -0.236937740176 |
| NM_007355    | HSP90AB1 |      | 1048 | 1138            | 0.847194738154  |
| NM_007355    | HSP90AB1 |      | 1191 | 1234            | -0.152805261846 |
| NM_007350    | PHLDA1   | 743  | 769  | 5.21236136067   |                 |
| NM_001024629 | NRP1     | 1495 | 1557 | 11.7148753163   |                 |
| NM_001024629 | NRP1     | 1595 | 1635 | 11.352478987    |                 |
| NM_001024629 | NRP1     | 1416 | 1452 | 10.1300798349   |                 |
| NM_001024629 | NRP1     | 383  | 456  | 11.5451173341   |                 |
| NM_001024629 | NRP1     | 1191 | 1210 | 8.46098485581   |                 |
| NM_001042724 | PVRL2    | 1184 | 1250 | 8.78153368748   |                 |
| NM_001042724 | PVRL2    | 730  | 795  | 9.36649618819   |                 |
| NM_001042724 | PVRL2    | 958  | 1005 | 7.78135993716   |                 |
| NM_001042724 | PVRL2    | 2246 | 2297 | 6.1965644557    |                 |
| NM_001042724 | PVRL2    | 199  | 294  | 8.51832553132   |                 |
| NM_001042724 | PVRL2    | 558  | 607  | 7.78152695642   |                 |
| NM_001042724 | PVRL2    | 1114 | 1167 | 7.78153345156   |                 |
| NM_001042724 | PVRL2    | 1300 | 1359 | 7.19255358658   |                 |
| NM_199444    | COPE     | 513  | 591  | 4.85875067634   |                 |
| NM_199440    | HSPD1    | 1557 | 1592 | 0.57485498731   |                 |
| NM_199440    | HSPD1    | 862  | 932  | 2.27529470567   |                 |
| NM_199440    | HSPD1    | 1627 | 1658 | -0.425318762786 |                 |
| NM_199440    | HSPD1    | 1076 | 1144 | 0.574854979983  |                 |
| NM_199440    | HSPD1    | 537  | 568  | 0.0756782788697 |                 |
| NM_199440    | HSPD1    | 1270 | 1358 | 0.89678308242   |                 |
| NM_024682    | TBC1D17  | 1644 | 1663 | 9.30790612523   |                 |
| NM_003299    | HSP90B1  | 2054 | 2129 | 3.02189168959   |                 |

|              |         |      |      |                 |
|--------------|---------|------|------|-----------------|
| NM_003299    | HSP90B1 | 1464 | 1537 | 2.0676953792    |
| NM_003299    | HSP90B1 | 1946 | 2047 | 2.15515822045   |
| NM_003299    | HSP90B1 | 389  | 441  | 0.389623238169  |
| NM_003299    | HSP90B1 | 1020 | 1074 | 1.52712699784   |
| NM_003299    | HSP90B1 | 1342 | 1403 | 2.65265787992   |
| NM_003299    | HSP90B1 | 1549 | 1613 | 2.82258288136   |
| NM_003299    | HSP90B1 | 779  | 799  | -1.93632222097  |
| NM_003299    | HSP90B1 | 944  | 988  | -2.01644383018  |
| NM_003299    | HSP90B1 | 1655 | 1727 | 1.23762038064   |
| NM_003299    | HSP90B1 | 586  | 668  | 1.65265787992   |
| NM_003299    | HSP90B1 | 78   | 181  | 2.0676953792    |
| NM_003299    | HSP90B1 | 233  | 345  | 3.0676953792    |
| NM_003299    | HSP90B1 | 677  | 736  | 0.0676951432818 |
| NM_003299    | HSP90B1 | 2136 | 2227 | 2.65265787992   |
| NM_003299    | HSP90B1 | 842  | 931  | 1.97458597481   |
| NM_003299    | HSP90B1 | 1793 | 1917 | 1.52712699784   |
| NM_003299    | HSP90B1 | 470  | 578  | 1.76813509734   |
| NM_003299    | HSP90B1 | 1079 | 1196 | 2.59125733526   |
| NM_003299    | HSP90B1 | 2375 | 2623 | 2.92567637433   |
| NM_003299    | HSP90B1 | 1408 | 1461 | 0.0676953792005 |
| NM_003299    | HSP90B1 | 2243 | 2343 | 2.92567637433   |
| NM_003290    | TPM4    | 646  | 722  | 2.29532044039   |
| NM_003295    | TPT1    | 1758 | 1806 | 1.05637681423   |
| NM_003295    | TPT1    | 276  | 336  | -0.206657591826 |
| NM_004952    | EFNA3   | 38   | 68   | 11.2624898106   |
| NM_006005    | WFS1    | 1364 | 1424 | 8.15518258849   |
| NM_006009    | TUBA1A  | 794  | 830  | 5.99008750342   |
| NM_006009    | TUBA1A  | 668  | 719  | 7.07422670525   |
| NM_006009    | TUBA1A  | 904  | 950  | 6.07020911263   |
| NM_001127245 | LRRC8A  | 463  | 508  | 7.70948373713   |
| NM_005927    | MFAP3   | 948  | 1025 | 8.48762525133   |
| NM_005927    | MFAP3   | 565  | 627  | 9.16569715645   |
| NM_001077397 | IRF2BP2 | 1428 | 1494 | 8.0189887935    |
| NM_079423    | MYL6    | 324  | 392  | 1.10051132993   |
| NM_002654    | PKM2    | 1706 | 1763 | 3.80831886913   |
| NM_002654    | PKM2    | 1939 | 2004 | 3.29374569629   |
| NM_002654    | PKM2    | 911  | 968  | 2.48638404319   |
| NM_002654    | PKM2    | 728  | 793  | 2.48639053832   |
| NM_002654    | PKM2    | 479  | 530  | 3.07135303904   |
| NM_002654    | PKM2    | 797  | 833  | 1.40225156486   |
| NM_002654    | PKM2    | 200  | 240  | 2.48639053832   |
| NM_002654    | PKM2    | 1142 | 1192 | 3.9418047927    |
| NM_002654    | PKM2    | 573  | 650  | 2.07135327474   |
| NM_013436    | NCKAP1  | 645  | 681  | 3.38482708447   |
| NM_013438    | UBQLN1  | 1322 | 1366 | 5.33961484672   |
| NM_015457    | ZDHHC5  | 871  | 932  | 10.5166251764   |
| NM_015457    | ZDHHC5  | 1967 | 2009 | 10.5166251764   |
| NM_001357    | DHX9    | 3407 | 3446 | 5.26414608242   |
| NM_002356    | MARCKS  | 917  | 946  | 8.62591907094   |
| NM_012453    | TBL2    | 965  | 1023 | 6.95268690654   |

|              |          |      |      |               |               |
|--------------|----------|------|------|---------------|---------------|
| NM_012453    | TBL2     | 1028 | 1079 | 8.27460827037 |               |
| NM_012453    | TBL2     | 830  | 855  | 7.53764267621 |               |
| NM_001002029 | C4B      | 1500 | 1563 | 6.47845236927 |               |
| NM_001002029 | C4B      | 4286 | 4331 | 4.15652427438 |               |
| NM_001002029 | C4B      | 3499 | 3546 | 4.74148653918 |               |
| NM_001002029 | C4B      | 4773 | 4814 | 3.15635052406 |               |
| NM_001002029 | C4B      | 2387 | 2489 | 7.47845236927 |               |
| NM_001002029 | C4B      | 3432 | 3485 | 5.47845236927 |               |
| NM_001002029 | C4B      | 375  | 440  | 5.15651754332 |               |
| NM_001002029 | C4B      | 2721 | 2761 | 4.74131302478 |               |
| NM_001002029 | C4B      | 1066 | 1124 | 4.07238506499 |               |
| NM_001002029 | C4B      | 5089 | 5143 | 3.15652426683 |               |
| NM_001002029 | C4B      | 5152 | 5203 | 5.47845236927 |               |
| NM_001002029 | C4B      | 2068 | 2125 | 4.74148676755 |               |
| NM_001002029 | C4B      | 1829 | 1889 | 3.15635052406 |               |
| NM_001002029 | C4B      | 1272 | 1302 | 3.07238506499 |               |
| NM_001002029 | C4B      | 2825 | 2917 | 6.32644927582 |               |
| NM_001002029 | C4B      | 892  | 953  | 3.15652403846 |               |
| NM_001002029 | C4B      | 2595 | 2666 | 6.32644927582 |               |
| NM_001002029 | C4B      | 545  | 619  | 5.15635052406 |               |
| NM_001002029 | C4B      | 4451 | 4633 | 7.40445178782 |               |
| NM_001002029 | C4B      | 1911 | 1978 | 4.7414867751  |               |
| NM_178031    | TMEM132A |      | 54   | 84            | 8.77820409367 |
| NM_178031    | TMEM132A |      | 934  | 974           | 8.69406512021 |
| NM_182547    | TMED4    | 559  | 657  | 9.17754198306 |               |
| NM_182547    | TMED4    | 506  | 559  | 7.41183348638 |               |
| NM_182547    | TMED4    | 379  | 439  | 6.08990539149 |               |
| NM_182547    | TMED4    | 448  | 486  | 5.08990539149 |               |
| NM_001005619 | ITGB4    | 1420 | 1468 | 12.0080098072 |               |
| NM_006793    | PRDX3    | 580  | 621  | 5.03532194609 |               |
| NM_004099    | STOM     | 564  | 588  | 5.71416036907 |               |
| NM_004099    | STOM     | 855  | 913  | 7.52152202218 |               |
| NM_004099    | STOM     | 455  | 486  | 6.03609495909 |               |
| NM_004099    | STOM     | 636  | 734  | 7.17359871876 |               |
| NM_006836    | GCN1L1   | 6733 | 6752 | 7.11767790853 |               |
| NM_006836    | GCN1L1   | 495  | 559  | 8.34007032986 |               |
| NM_006836    | GCN1L1   | 1806 | 1844 | 7.45259379859 |               |
| NM_006836    | GCN1L1   | 681  | 729  | 7.03755629932 |               |
| NM_006836    | GCN1L1   | 2558 | 2638 | 7.53271540781 |               |
| NM_004898    | CLOCK    | 5382 | 5415 | 9.38146083544 |               |
| NM_004897    | MINPP1   | 1567 | 1626 | 7.96426425527 |               |
| NM_004897    | MINPP1   | 1394 | 1434 | 7.54922026086 |               |
| NM_004897    | MINPP1   | 1812 | 1835 | 8.28618585502 |               |
| NM_004897    | MINPP1   | 586  | 656  | 8.28619235016 |               |
| NM_004897    | MINPP1   | 792  | 947  | 9.77161941325 |               |
| NM_020117    | LARS     | 3804 | 3829 | 5.4973197308  |               |
| NM_004541    | NDUFA1   | 174  | 213  | 4.37806115916 |               |
| NM_004549    | NDUFC2   | 710  | 745  | 7.23088342638 |               |
| NM_006768    | BRAP     | 238  | 258  | 6.34205264946 |               |
| NM_006761    | YWHAE    | 859  | 914  | 2.53138478007 |               |

|              |          |       |       |                   |
|--------------|----------|-------|-------|-------------------|
| NM_182961    | SYNE1    | 11831 | 11850 | 8.90343074455     |
| NM_006425    | SLU7     | 317   | 336   | 3.73577649465     |
| NM_003713    | PPAP2B   | 953   | 979   | 8.14741625392     |
| NM_003713    | PPAP2B   | 816   | 849   | 8.34006806292     |
| NM_003713    | PPAP2B   | 1042  | 1068  | 6.92101296347     |
| NM_003713    | PPAP2B   | 1377  | 1435  | 7.92503056364     |
| NM_003713    | PPAP2B   | 1285  | 1311  | 6.25592885353     |
| NM_003714    | STC2     | 1791  | 1881  | 9.38283009929     |
| NM_001145442 | POTEM    | 2009  | 2053  | 11.6761413751     |
| NM_018509    | LRRRC59  | 361   | 384   | 4.02580271195     |
| NM_001606    | ABCA2    | 7835  | 7886  | 9.37381950562     |
| NM_019109    | ALG1     | 1176  | 1231  | 7.11935221939     |
| NM_019101    | APOM     | 390   | 452   | 7.28525843898     |
| NM_019107    | C19orf10 |       | 806   | 855 6.5773050658  |
| NM_019107    | C19orf10 |       | 229   | 264 6.57328746564 |
| NM_019107    | C19orf10 |       | 275   | 333 4.25135937075 |
| NM_019107    | C19orf10 |       | 71    | 162 6.84033947142 |
| NM_016107    | ZFR      | 180   | 202   | 4.20336205052     |
| NM_016103    | SAR1B    | 410   | 457   | 7.38431090088     |
| NM_198216    | SNRPB    | 279   | 338   | 3.16625925387     |
| NM_198216    | SNRPB    | 354   | 402   | 1.75122175459     |
| NM_198216    | SNRPB    | 197   | 240   | 2.40405487042     |
| NM_144765    | MPZL2    | 645   | 692   | 8.75408669628     |
| NM_144765    | MPZL2    | 794   | 847   | 8.10585384956     |
| NM_000099    | CST3     | 405   | 477   | 6.34525450963     |
| NM_000099    | CST3     | 532   | 582   | 4.90467518719     |
| NM_000099    | CST3     | 303   | 383   | 4.09732698864     |
| NM_000096    | CP       | 3058  | 3115  | 2.666843276       |
| NM_000096    | CP       | 1039  | 1100  | 3.89325329751     |
| NM_000096    | CP       | 2158  | 2198  | 4.08589837545     |
| NM_000096    | CP       | 1150  | 1189  | 2.08572462513     |
| NM_000096    | CP       | 1850  | 1894  | 3.08589837544     |
| NM_000096    | CP       | 2453  | 2493  | 3.08572462513     |
| NM_000096    | CP       | 1213  | 1278  | 4.67086087595     |
| NM_000096    | CP       | 2826  | 2872  | 2.67086087617     |
| NM_000096    | CP       | 327   | 383   | 4.54532999409     |
| NM_000096    | CP       | 811   | 851   | 4.25582337689     |
| NM_000096    | CP       | 1350  | 1431  | 3.89325329751     |
| NM_000096    | CP       | 487   | 538   | 4.08589837545     |
| NM_000096    | CP       | 3161  | 3229  | 3.40782647034     |
| NM_000096    | CP       | 1797  | 1830  | 3.40782646279     |
| NM_000096    | CP       | 723   | 806   | 3.08589837545     |
| NM_000096    | CP       | 889   | 934   | 4.40782647034     |
| NM_000096    | CP       | 1895  | 1981  | 3.40782646279     |
| NM_000096    | CP       | 2612  | 2707  | 2.0858983679      |
| NM_000096    | CP       | 2880  | 2945  | 2.67086086862     |
| NM_000096    | CP       | 2239  | 2272  | 2.08188077528     |
| NM_000096    | CP       | 956   | 1023  | 3.40782647034     |
| NM_021183    | RAP2C    | 2565  | 2584  | 5.04767492757     |
| NM_004390    | CTSH     | 835   | 891   | 6.42437339965     |

|              |           |      |      |                  |
|--------------|-----------|------|------|------------------|
| NM_004390    | CTSH      | 980  | 1070 | 6.31745819573    |
| NM_004390    | CTSH      | 342  | 407  | 2.61300087742    |
| NM_004396    | DDX5      | 1178 | 1227 | 3.15545897542    |
| NM_001164161 | PPP6R3    | 2886 | 2936 | 5.88263055805    |
| NM_024809    | TCTN2     | 322  | 380  | 7.49858450423    |
| NM_003270    | TSPAN6    | 772  | 809  | 3.68653699195    |
| NM_003270    | TSPAN6    | 680  | 729  | 4.68653699195    |
| NM_003270    | TSPAN6    | 423  | 501  | 6.27150622373    |
| NM_004978    | KCNC4     | 986  | 1017 | 10.9135520472    |
| NM_006026    | H1FX      | 374  | 420  | 5.693185039      |
| NM_003017    | SRSF3     | 219  | 279  | 5.42508786225    |
| NM_001079804 | GAA       | 2282 | 2361 | 7.25544663426    |
| NM_001079804 | GAA       | 2801 | 2844 | 9.25946423443    |
| NM_001079804 | GAA       | 1149 | 1187 | 7.25946422688    |
| NM_001079804 | GAA       | 2020 | 2099 | 9.71889585307    |
| NM_001079804 | GAA       | 578  | 622  | 10.0668191565    |
| NM_001079804 | GAA       | 1887 | 1959 | 9.06681915649    |
| NM_001079804 | GAA       | 1668 | 1723 | 8.84442673515    |
| NM_001079804 | GAA       | 1321 | 1411 | 7.25544663426    |
| NM_032116    | KATNAL1   | 496  | 517  | 9.74952121605    |
| NM_032449    | CC2D1B    | 3233 | 3253 | 8.97904090535    |
| NM_002634    | PHB       | 413  | 453  | 5.5521632333     |
| NM_002630    | PGC       | 954  | 1029 | 7.48428431863    |
| NM_002630    | PGC       | 340  | 378  | 7.84684767451    |
| NM_002630    | PGC       | 485  | 527  | 6.99885726309    |
| NM_002630    | PGC       | 163  | 223  | 5.6767556538     |
| NM_002630    | PGC       | 241  | 311  | 5.6767556538     |
| NM_002631    | PGD       | 42   | 100  | 4.73306248165    |
| NM_014294    | TRAM1     | 880  | 945  | 7.54014825565    |
| NM_014294    | TRAM1     | 1109 | 1175 | 8.02557508282    |
| NM_014294    | TRAM1     | 1022 | 1090 | 9.02557508282    |
| NM_014294    | TRAM1     | 776  | 862  | 8.6776517794     |
| NM_014294    | TRAM1     | 988  | 1022 | 5.13408095138    |
| NM_014294    | TRAM1     | 1467 | 1511 | 5.21821342971    |
| NM_014294    | TRAM1     | 309  | 377  | 8.21804641044    |
| NM_014294    | TRAM1     | 1297 | 1366 | 8.6776517794     |
| NM_015470    | RAB11FIP5 |      | 73   | 96 7.36153300627 |
| NM_021978    | ST14      | 1096 | 1179 | 11.7260299831    |
| NM_021978    | ST14      | 1947 | 2009 | 12.0479580855    |
| NM_021978    | ST14      | 1825 | 1870 | 12.5333846768    |
| NM_021978    | ST14      | 1271 | 1299 | 11.6418907813    |
| NM_021974    | POLR2F    | 121  | 169  | 4.51187097765    |
| NM_014246    | CELSR1    | 8877 | 8920 | 15.5652687688    |
| NM_014246    | CELSR1    | 1904 | 1958 | 14.2393298048    |
| NM_001077516 | SLC39A7   | 496  | 533  | 4.13793538333    |
| NM_001077516 | SLC39A7   | 1456 | 1505 | 5.94529703644    |
| NM_001077516 | SLC39A7   | 760  | 796  | 5.45987020172    |
| NM_001077516 | SLC39A7   | 809  | 850  | 5.13794210684    |
| NM_001077516 | SLC39A7   | 569  | 633  | 4.13794210684    |
| NM_001077516 | SLC39A7   | 129  | 211  | 5.45987020927    |

|              |         |      |      |               |
|--------------|---------|------|------|---------------|
| NM_001077516 | SLC39A7 | 681  | 750  | 5.45987020927 |
| NM_001077516 | SLC39A7 | 874  | 974  | 7.04483270999 |
| NM_001077516 | SLC39A7 | 1042 | 1251 | 7.89282961655 |
| NM_033420    | C19orf6 | 2161 | 2205 | 7.43535913799 |
| NM_033420    | C19orf6 | 2206 | 2271 | 7.75344338302 |
| NM_033420    | C19orf6 | 313  | 388  | 7.67332177381 |
| NM_017994    | C7orf42 | 419  | 474  | 7.44391261616 |
| NM_012434    | SLC17A5 | 343  | 393  | 11.0240744851 |
| NM_012434    | SLC17A5 | 281  | 335  | 11.0240744851 |
| NM_178014    | TUBB    | 1177 | 1218 | 1.36319727563 |
| NM_178014    | TUBB    | 414  | 466  | 3.9481665074  |
| NM_178014    | TUBB    | 626  | 711  | 4.68513210157 |
| NM_178014    | TUBB    | 1490 | 1544 | 3.68512537052 |
| NM_178014    | TUBB    | 915  | 1000 | 5.2700946023  |
| NM_178014    | TUBB    | 1236 | 1341 | 4.94816650741 |
| NM_178014    | TUBB    | 481  | 605  | 4.82263562532 |
| NM_183416    | KIF1B   | 5596 | 5623 | 7.80500730359 |
| NM_004704    | RRP9    | 596  | 618  | 8.31258520678 |
| NM_002116    | HLA-A   | 365  | 420  | 8.37278653549 |
| NM_002116    | HLA-A   | 441  | 489  | 5.4185902251  |
| NM_002116    | HLA-A   | 1173 | 1211 | 5.00355271827 |
| NM_002116    | HLA-A   | 1122 | 1165 | 5.74051831998 |
| NM_002116    | HLA-A   | 641  | 708  | 6.74051831999 |
| NM_002116    | HLA-A   | 282  | 361  | 6.74051831999 |
| NM_002116    | HLA-A   | 1333 | 1391 | 8.00355272582 |
| NM_002116    | HLA-A   | 1013 | 1108 | 6.22594514716 |
| NM_002116    | HLA-A   | 1214 | 1271 | 4.4185902251  |
| NM_002116    | HLA-A   | 1276 | 1324 | 5.0035524899  |
| NM_002116    | HLA-A   | 741  | 932  | 7.94215218116 |
| NM_002116    | HLA-A   | 93   | 140  | 3.41457262493 |
| NM_002116    | HLA-A   | 496  | 585  | 7.74051831999 |
| NM_002116    | HLA-A   | 1435 | 1494 | 4.41841647478 |
| NM_001251    | CD68    | 1136 | 1161 | 7.07739191748 |
| NM_001251    | CD68    | 827  | 875  | 6.15751352669 |
| NM_001251    | CD68    | 888  | 932  | 6.6623544182  |
| NM_006854    | KDELR2  | 727  | 764  | 6.49439013062 |
| NM_006854    | KDELR2  | 490  | 540  | 5.97981695779 |
| NM_006854    | KDELR2  | 611  | 718  | 7.49439013062 |
| NM_006854    | KDELR2  | 550  | 608  | 4.17246202818 |
| NM_006854    | KDELR2  | 831  | 870  | 5.75725078614 |
| NM_006854    | KDELR2  | 167  | 248  | 5.97981695779 |
| NM_006858    | TMED1   | 429  | 496  | 6.94142832941 |
| NM_006858    | TMED1   | 294  | 332  | 6.35647255219 |
| NM_001146069 | MFSD10  | 864  | 903  | 10.195471325  |
| NM_001146069 | MFSD10  | 373  | 424  | 10.5172259055 |
| NM_001146069 | MFSD10  | 293  | 327  | 11.0026527327 |
| NM_001146069 | MFSD10  | 221  | 267  | 9.19529781063 |
| NM_001146069 | MFSD10  | 1222 | 1270 | 9.69629485228 |
| NM_020170    | NCLN    | 1219 | 1275 | 8.26202064841 |
| NM_020170    | NCLN    | 151  | 195  | 8.84697641808 |



|              |       |      |      |                  |
|--------------|-------|------|------|------------------|
| NM_020170    | NCLN  | 1058 | 1095 | 9.06936883942    |
| NM_020170    | NCLN  | 755  | 831  | 8.26202064841    |
| NM_020170    | NCLN  | 2928 | 3011 | 7.25800304824    |
| NM_020170    | NCLN  | 412  | 476  | 9.06937557047    |
| NM_016732    | RALY  | 1250 | 1278 | 4.18603024563    |
| NM_004990    | MARS  | 2724 | 2765 | 4.68241215849    |
| NM_144599    | NIPA1 | 5733 | 5752 | 7.87648623737    |
| NM_001012321 | RPSA  | 821  | 876  | 2.27129526751    |
| NM_001012321 | RPSA  | 181  | 229  | 0.690343635908   |
| NM_002026    | FN1   | 1548 | 1658 | 3.09988779645    |
| NM_002026    | FN1   | 3632 | 3719 | 3.30633867392    |
| NM_002026    | FN1   | 6713 | 6804 | 3.48691091956    |
| NM_002026    | FN1   | 5640 | 5705 | 1.98441057903    |
| NM_002026    | FN1   | 2577 | 2615 | 1.98441057903    |
| NM_002026    | FN1   | 2081 | 2183 | 1.85887969694    |
| NM_002026    | FN1   | 2992 | 3035 | 0.984410578806   |
| NM_002026    | FN1   | 5299 | 5338 | -0.0155961520257 |
| NM_002026    | FN1   | 3037 | 3142 | 1.20680300036    |
| NM_002026    | FN1   | 1178 | 1248 | 2.39944807831    |
| NM_002026    | FN1   | 3337 | 3379 | 2.39944807831    |
| NM_002026    | FN1   | 1468 | 1503 | -0.600725672011  |
| NM_002026    | FN1   | 3796 | 3861 | 1.98441057903    |
| NM_002026    | FN1   | 3391 | 3454 | 0.984410343109   |
| NM_002026    | FN1   | 4652 | 4683 | 1.85887969694    |
| NM_002026    | FN1   | 2329 | 2359 | 0.395430478134   |
| NM_002026    | FN1   | 6805 | 6895 | 3.39944807831    |
| NM_002026    | FN1   | 2187 | 2238 | 0.721376173194   |
| NM_002026    | FN1   | 4008 | 4089 | 2.72137617319    |
| NM_002026    | FN1   | 2630 | 2688 | 1.20680300036    |
| NM_002026    | FN1   | 4596 | 4644 | 1.85887969694    |
| NM_002026    | FN1   | 5884 | 5969 | 3.39944807831    |
| NM_002026    | FN1   | 6275 | 6318 | 1.85887969694    |
| NM_002026    | FN1   | 456  | 504  | 1.39944784239    |
| NM_002026    | FN1   | 5119 | 5201 | 3.20680300036    |
| NM_002026    | FN1   | 7297 | 7331 | -0.600725672011  |
| NM_002026    | FN1   | 5539 | 5625 | 1.72137617319    |
| NM_002026    | FN1   | 1291 | 1338 | 1.20680300036    |
| NM_002026    | FN1   | 3495 | 3544 | 0.721376165645   |
| NM_002026    | FN1   | 6902 | 7037 | 3.52873109525    |
| NM_002026    | FN1   | 5713 | 5812 | 3.68485029717    |
| NM_002026    | FN1   | 3143 | 3180 | 1.85887969694    |
| NM_002026    | FN1   | 76   | 167  | 2.30633867392    |
| NM_002026    | FN1   | 1860 | 2011 | 3.89130117464    |
| NM_002026    | FN1   | 6484 | 6544 | 2.20680300036    |
| NM_002026    | FN1   | 4244 | 4302 | 0.315308868923   |
| NM_002026    | FN1   | 2689 | 2772 | 3.72137617319    |
| NM_002026    | FN1   | 4900 | 4972 | 1.56937307975    |
| NM_002026    | FN1   | 2375 | 2554 | 3.82571283301    |
| NM_002026    | FN1   | 3906 | 3997 | 2.30633867392    |
| NM_002026    | FN1   | 4810 | 4844 | -1.68469113108   |

|              |           |       |       |                    |
|--------------|-----------|-------|-------|--------------------|
| NM_002026    | FN1       | 6141  | 6275  | 2.64737559175      |
| NM_002026    | FN1       | 6324  | 6445  | 1.85887969694      |
| NM_002026    | FN1       | 5047  | 5113  | 2.20680300036      |
| NM_002026    | FN1       | 3546  | 3607  | 1.56937307975      |
| NM_002026    | FN1       | 2241  | 2271  | -0.0997286303559   |
| NM_002026    | FN1       | 706   | 1175  | 5.85887969694      |
| NM_002026    | FN1       | 6547  | 6668  | 3.09988779645      |
| NM_002026    | FN1       | 1362  | 1468  | 3.89130117464      |
| NM_002026    | FN1       | 4338  | 4435  | 2.79176550109      |
| NM_002026    | FN1       | 3221  | 3330  | 1.56937307975      |
| NM_002026    | FN1       | 521   | 677   | 4.30633867392      |
| NM_002026    | FN1       | 2812  | 2941  | 3.60890144394      |
| NM_002026    | FN1       | 7044  | 7194  | 2.64737559175      |
| NM_002026    | FN1       | 1742  | 1833  | 3.15433558047      |
| NM_007033    | RER1      | 569   | 640   | 9.37443593491      |
| NM_031308    | EPPK1     | 9341  | 9391  | 9.27351981534      |
| NM_031308    | EPPK1     | 9886  | 9921  | 9.27736366519      |
| NM_031308    | EPPK1     | 14689 | 14724 | 10.1933982061      |
| NM_031308    | EPPK1     | 11488 | 11523 | 9.27351981534      |
| NM_031307    | PUS3      | 20    | 41    | 5.94597987898      |
| NM_001136049 | LMLN      | 2925  | 2961  | 10.8675178563      |
| NM_003486    | SLC7A5    | 1392  | 1455  | 8.46384225803      |
| NM_207371    | C10orf140 |       | 3160  | 3210 14.2907795537 |
| NM_005885    | MARCH6    | 2642  | 2736  | 8.72844133712      |
| NM_005885    | MARCH6    | 2407  | 2467  | 8.95083375846      |
| NM_005885    | MARCH6    | 1433  | 1506  | 7.95083352254      |
| NM_005885    | MARCH6    | 1078  | 1137  | 7.46540693129      |
| NM_005885    | MARCH6    | 1332  | 1377  | 7.14347883618      |
| NM_005885    | MARCH6    | 1892  | 1953  | 7.46540669537      |
| NM_005885    | MARCH6    | 2316  | 2387  | 6.1434788364       |
| NM_005885    | MARCH6    | 2253  | 2313  | 6.14347882885      |
| NM_005885    | MARCH6    | 2903  | 2934  | 7.05933962702      |
| NM_003730    | RNASSET2  | 617   | 660   | 2.2080468397       |
| NM_001145461 | YIF1B     | 749   | 795   | 8.49705118907      |
| NM_001008800 | CCT3      | 706   | 750   | 4.12243116175      |
| NM_005080    | XBP1      | 647   | 682   | 3.14223540489      |
| NM_005776    | CNIH      | 358   | 422   | 3.4171385148       |
| NM_005776    | CNIH      | 433   | 466   | 2.41696476448      |
| NM_005779    | LHFPL2    | 35    | 58    | 8.22498634575      |
| NM_016127    | TMEM66    | 955   | 998   | 2.49316267537      |
| NM_016127    | TMEM66    | 1025  | 1081  | 4.07812541201      |
| NM_016127    | TMEM66    | 673   | 714   | 3.81509099862      |
| NM_016127    | TMEM66    | 480   | 627   | 5.07812541201      |
| NM_016127    | TMEM66    | 716   | 832   | 4.30051783334      |
| NM_016128    | COPG      | 1641  | 1682  | 6.98551921163      |
| NM_138373    | MYADM     | 1070  | 1133  | 11.068374966       |
| NM_138373    | MYADM     | 877   | 921   | 10.3314093718      |
| NM_138373    | MYADM     | 1019  | 1070  | 11.1614843704      |
| NM_138373    | MYADM     | 375   | 434   | 8.74644687109      |
| NM_138373    | MYADM     | 961   | 1009  | 9.4834057342       |

|              |                |      |      |               |               |
|--------------|----------------|------|------|---------------|---------------|
| NM_138373    | MYADM          | 670  | 788  | 10.7464468711 |               |
| NM_004597    | SNRPD2         | 503  | 545  | 6.37325527708 |               |
| NM_000611    | CD59           | 448  | 477  | 4.73886261919 |               |
| NM_000611    | CD59           | 351  | 438  | 8.73886285511 |               |
| NM_181575    | AUP1           | 816  | 858  | 4.74699509309 |               |
| NM_181575    | AUP1           | 579  | 608  | 4.74315124324 |               |
| NM_181575    | AUP1           | 1168 | 1215 | 6.55452376525 |               |
| NM_181575    | AUP1           | 405  | 465  | 5.98495772892 |               |
| NM_133493    | CD109          | 5538 | 5559 | 11.0916034147 |               |
| NM_000075    | CDK4           | 252  | 305  | 6.2928634675  |               |
| NM_000612    | IGF2           | 963  | 1013 | 3.54884776001 |               |
| NM_001006    | RPS3A          | 259  | 297  | 0.23522412166 |               |
| NM_001006    | RPS3A          | 610  | 633  | 1.5609960664  |               |
| NM_003255    | TIMP2          | 449  | 503  | 4.34871915335 |               |
| NM_003255    | TIMP2          | 795  | 858  | 5.34889290367 |               |
| NM_003255    | TIMP2          | 589  | 619  | 2.67979119357 |               |
| NM_004911    | PDIA4          | 393  | 478  | 6.04675215428 |               |
| NM_004911    | PDIA4          | 2127 | 2175 | 5.04675215428 |               |
| NM_004911    | PDIA4          | 2187 | 2254 | 4.68418207467 |               |
| NM_004911    | PDIA4          | 703  | 749  | 4.87682715284 |               |
| NM_004911    | PDIA4          | 809  | 882  | 5.57726687098 |               |
| NM_004911    | PDIA4          | 313  | 385  | 4.87682715283 |               |
| NM_004911    | PDIA4          | 1492 | 1576 | 6.33625877148 |               |
| NM_004911    | PDIA4          | 1019 | 1058 | 3.46161590324 |               |
| NM_004911    | PDIA4          | 1743 | 1815 | 5.04675214673 |               |
| NM_004911    | PDIA4          | 895  | 923  | 3.46161590324 |               |
| NM_004911    | PDIA4          | 1580 | 1731 | 7.12475466628 |               |
| NM_004911    | PDIA4          | 1850 | 1930 | 2.87280955267 |               |
| NM_004911    | PDIA4          | 491  | 522  | 2.87665340252 |               |
| NM_004911    | PDIA4          | 758  | 808  | 4.19875524018 |               |
| NM_004911    | PDIA4          | 1143 | 1198 | 4.19875524773 |               |
| NM_004911    | PDIA4          | 1394 | 1472 | 5.19875524773 |               |
| NM_001017423 | ALDH18A1       |      | 1885 | 1947          | 5.18045050219 |
| NM_001017423 | ALDH18A1       |      | 727  | 766           | 5.58173812753 |
| NM_001017423 | ALDH18A1       |      | 306  | 337           | 2.85450481468 |
| NM_001017423 | ALDH18A1       |      | 2465 | 2540          | 2.85852241485 |
| NM_001199973 | RPL36A-HNRNPH2 |      | 341  | 378           | 2.12885365722 |
| NM_198536    | TMEM205        | 1151 | 1186 | 10.0789443689 |               |
| NM_001135602 | GLB1           | 1119 | 1199 | 8.49838397763 |               |
| NM_001135602 | GLB1           | 1607 | 1669 | 8.49838397762 |               |
| NM_001135602 | GLB1           | 1236 | 1294 | 7.76141838324 |               |
| NM_001135602 | GLB1           | 859  | 902  | 7.41424476825 |               |
| NM_001135602 | GLB1           | 1399 | 1427 | 6.17243828257 |               |
| NM_001135602 | GLB1           | 309  | 354  | 6.76124463315 |               |
| NM_003038    | SLC1A4         | 954  | 978  | 8.53569616231 |               |
| NM_003038    | SLC1A4         | 1607 | 1659 | 9.95475126176 |               |
| NM_003038    | SLC1A4         | 1718 | 1758 | 8.27650560633 |               |
| NM_003038    | SLC1A4         | 1041 | 1105 | 9.76210618382 |               |
| NM_003038    | SLC1A4         | 776  | 835  | 8.95475126176 |               |
| NM_003038    | SLC1A4         | 1470 | 1519 | 6.87061205237 |               |

|              |          |      |      |               |                 |
|--------------|----------|------|------|---------------|-----------------|
| NM_003038    | SLC1A4   | 1345 | 1382 | 7.4555745531  |                 |
| NM_003032    | ST6GAL1  | 3832 | 3887 | 6.08113769891 |                 |
| NM_003032    | ST6GAL1  | 1296 | 1354 | 6.44370777807 |                 |
| NM_003032    | ST6GAL1  | 987  | 1019 | 5.85857152726 |                 |
| NM_003032    | ST6GAL1  | 1075 | 1100 | 4.27378277663 |                 |
| NM_003032    | ST6GAL1  | 850  | 946  | 6.4437077783  |                 |
| NM_003032    | ST6GAL1  | 601  | 663  | 4.26976517668 |                 |
| NM_012229    | NT5C2    | 970  | 1002 | 4.56757764908 |                 |
| NM_002342    | LTBR     | 757  | 803  | 7.5497746773  |                 |
| NM_002615    | SERPINF1 |      | 1042 | 1090          | 5.12079177608   |
| NM_002615    | SERPINF1 |      | 423  | 507           | 5.24632265816   |
| NM_002615    | SERPINF1 |      | 98   | 139           | 3.66136015744   |
| NM_002615    | SERPINF1 |      | 976  | 1025          | 2.24632242224   |
| NM_002615    | SERPINF1 |      | 606  | 637           | 0.661360149888  |
| NM_002615    | SERPINF1 |      | 517  | 603           | 5.18492211349   |
| NM_002615    | SERPINF1 |      | 673  | 724           | 2.16218344878   |
| NM_002615    | SERPINF1 |      | 379  | 409           | 1.57722094805   |
| NM_002615    | SERPINF1 |      | 795  | 951           | 4.4687150795    |
| NM_002615    | SERPINF1 |      | 313  | 375           | 2.98328825232   |
| NM_002615    | SERPINF1 |      | 1210 | 1407          | 5.51934115257   |
| NM_005010    | NRCAM    | 3632 | 3662 | 13.8905941731 |                 |
| NM_002610    | PDK1     | 185  | 205  | 7.90149408049 |                 |
| NM_024531    | GPR172A  | 1391 | 1444 | 11.5593864598 |                 |
| NM_024531    | GPR172A  | 1501 | 1633 | 11.6968899835 |                 |
| NM_024531    | GPR172A  | 1288 | 1357 | 10.237458129  |                 |
| NM_033229    | TRIM15   | 426  | 467  | 6.21080009691 |                 |
| NM_001171812 | GBA      | 582  | 630  | 10.9462144723 |                 |
| NM_001171812 | GBA      | 1053 | 1086 | 10.531176973  |                 |
| NM_001171812 | GBA      | 1149 | 1202 | 10.6112985822 |                 |
| NM_001171812 | GBA      | 1427 | 1482 | 11.3522817765 |                 |
| NM_001171812 | GBA      | 342  | 373  | 10.6153094513 |                 |
| NM_001171812 | GBA      | 295  | 339  | 11.9462144723 |                 |
| NM_001171812 | GBA      | 1862 | 1911 | 11.2681425671 |                 |
| NM_001171812 | GBA      | 752  | 802  | 11.6153161824 |                 |
| NM_001171812 | GBA      | 1528 | 1577 | 9.02633608147 |                 |
| NM_001171812 | GBA      | 1939 | 2046 | 11.352281769  |                 |
| NM_001171812 | GBA      | 1228 | 1303 | 11.6153161824 |                 |
| NM_001171812 | GBA      | 827  | 895  | 12.2002784472 |                 |
| NM_005348    | HSP90AA1 |      | 2314 | 2356          | 2.0626816616    |
| NM_005348    | HSP90AA1 |      | 2139 | 2188          | -0.175107459827 |
| NM_005348    | HSP90AA1 |      | 1444 | 1492          | 1.82087517592   |
| NM_005348    | HSP90AA1 |      | 853  | 982           | 3.14682087098   |
| NM_005348    | HSP90AA1 |      | 430  | 501           | 2.14682087098   |
| NM_005348    | HSP90AA1 |      | 1730 | 1809          | 2.82489276854   |
| NM_005348    | HSP90AA1 |      | 1179 | 1251          | 2.82489277609   |
| NM_005347    | HSPA5    | 1679 | 1766 | 5.32927926795 |                 |
| NM_005347    | HSPA5    | 1527 | 1580 | 4.24681710776 |                 |
| NM_005347    | HSPA5    | 646  | 729  | 4.24681710776 |                 |
| NM_005347    | HSPA5    | 429  | 502  | 4.06624486211 |                 |
| NM_005347    | HSPA5    | 555  | 593  | 2.96670918856 |                 |

|              |          |      |      |               |               |
|--------------|----------|------|------|---------------|---------------|
| NM_005347    | HSPA5    | 1399 | 1520 | 5.96670918856 |               |
| NM_005347    | HSPA5    | 731  | 795  | 1.15533666633 |               |
| NM_005347    | HSPA5    | 250  | 372  | 4.74431676723 |               |
| NM_005347    | HSPA5    | 1768 | 1933 | 5.1593542665  |               |
| NM_005347    | HSPA5    | 373  | 420  | 2.74431676723 |               |
| NM_005347    | HSPA5    | 1147 | 1377 | 6.388172957   |               |
| NM_005347    | HSPA5    | 111  | 244  | 4.68291622256 |               |
| NM_005347    | HSPA5    | 809  | 1145 | 6.91424176867 |               |
| NM_005347    | HSPA5    | 1976 | 2150 | 5.40728177995 |               |
| NM_005347    | HSPA5    | 2151 | 2331 | 3.85979398465 |               |
| NM_001014433 | CUTA     | 540  | 584  | 5.87807943469 |               |
| NM_005340    | HINT1    | 391  | 450  | 3.76206511577 |               |
| NM_180991    | SLC04C1  | 1170 | 1226 | 12.5977582524 |               |
| NM_182507    | KRT80    | 1192 | 1221 | 6.60903452899 |               |
| NM_001063    | TF       | 1372 | 1413 | 0.54566184257 |               |
| NM_001063    | TF       | 2484 | 2559 | 1.83516845977 |               |
| NM_001063    | TF       | 505  | 717  | 3.73328884575 |               |
| NM_001063    | TF       | 453  | 493  | 1.07617655927 |               |
| NM_001063    | TF       | 1416 | 1598 | 4.0195930309  |               |
| NM_001063    | TF       | 233  | 428  | 3.48426129791 |               |
| NM_001063    | TF       | 2162 | 2298 | 3.32993315151 |               |
| NM_001063    | TF       | 2302 | 2455 | 2.69766493602 |               |
| NM_001063    | TF       | 721  | 1344 | 5.6378316865  |               |
| NM_001063    | TF       | 1629 | 2151 | 5.23371783626 |               |
| NM_004760    | STK17A   | 1020 | 1102 | 5.54904083938 |               |
| NM_022371    | TOR3A    | 1164 | 1215 | 7.35502242094 |               |
| NM_022373    | HERPUD2  | 1687 | 1751 | 7.12830095976 |               |
| NM_000447    | PSEN2    | 1211 | 1269 | 9.71048589531 |               |
| NM_006876    | B3GNT1   | 809  | 879  | 9.70302383786 |               |
| NM_006876    | B3GNT1   | 457  | 497  | 8.03392212797 |               |
| NM_006876    | B3GNT1   | 1361 | 1408 | 9.03392212797 |               |
| NM_006876    | B3GNT1   | 1060 | 1113 | 8.11404373719 |               |
| NM_020154    | C15orf24 |      | 183  | 235           | 5.89567871295 |
| NM_020154    | C15orf24 |      | 399  | 432           | 3.64161450968 |
| NM_020154    | C15orf24 |      | 454  | 495           | 3.72574698801 |
| NM_001199693 | SLC4A2   | 2424 | 2483 | 9.47338060649 |               |
| NM_001199693 | SLC4A2   | 1316 | 1372 | 9.39325899728 |               |
| NM_001199693 | SLC4A2   | 1156 | 1229 | 9.47739797074 |               |
| NM_001199693 | SLC4A2   | 1667 | 1699 | 8.47338060649 |               |
| NM_001199693 | SLC4A2   | 1094 | 1142 | 9.05834310721 |               |
| NM_001199693 | SLC4A2   | 3726 | 3777 | 9.71518709217 |               |
| NM_001199693 | SLC4A2   | 3219 | 3300 | 10.2847531287 |               |
| NM_001199693 | SLC4A2   | 2901 | 2961 | 9.06236070716 |               |
| NM_016243    | CYB5R1   | 212  | 247  | 9.68731584099 |               |
| NM_016243    | CYB5R1   | 877  | 907  | 8.36538774611 |               |
| NM_016243    | CYB5R1   | 827  | 876  | 9.44952671957 |               |
| NM_016245    | HSD17B11 |      | 239  | 298           | 3.54527257398 |
| NM_016245    | HSD17B11 |      | 435  | 546           | 6.30748368848 |
| NM_016245    | HSD17B11 |      | 355  | 407           | 4.11483861054 |
| NM_016245    | HSD17B11 |      | 923  | 994           | 4.47740868992 |

|              |              |      |                 |               |
|--------------|--------------|------|-----------------|---------------|
| NM_016245    | HSD17B11     | 629  | 660             | 2.2233444791  |
| NM_016245    | HSD17B11     | 708  | 783             | 2.8924461892  |
| NM_006469    | IVNS1ABP     | 60   | 82              | 5.48975575808 |
| NM_007231    | SLC6A14 1660 | 1726 | 13.1654945579   |               |
| NM_007231    | SLC6A14 777  | 843  | 12.9139557909   |               |
| NM_007231    | SLC6A14 82   | 140  | 10.8395488628   |               |
| NM_007231    | SLC6A14 1983 | 2025 | 9.51762076795   |               |
| NM_007231    | SLC6A14 1601 | 1657 | 12.4285289637   |               |
| NM_007231    | SLC6A14 255  | 311  | 8.52163163707   |               |
| NM_007231    | SLC6A14 587  | 633  | 10.8435664555   |               |
| NM_007231    | SLC6A14 1042 | 1082 | 11.1025832687   |               |
| NM_007231    | SLC6A14 1147 | 1181 | 10.5216383606   |               |
| NM_007231    | SLC6A14 962  | 999  | 10.8435664555   |               |
| NM_007231    | SLC6A14 1444 | 1598 | 12.9139557909   |               |
| NM_007231    | SLC6A14 847  | 941  | 10.843566463    |               |
| NM_000913    | OPRL1 1042   | 1064 | 12.1354039916   |               |
| NM_000917    | P4HA1 1335   | 1364 | 2.30577089838   |               |
| NM_000918    | P4HB 405     | 491  | 3.10205248505   |               |
| NM_000918    | P4HB 2139    | 2238 | 3.0025168115    |               |
| NM_000918    | P4HB 163     | 247  | 3.0025168115    |               |
| NM_000918    | P4HB 1869    | 1912 | 1.78012439017   |               |
| NM_000918    | P4HB 1412    | 1517 | 4.19516188945   |               |
| NM_000918    | P4HB 2408    | 2515 | 2.0025168115    |               |
| NM_000918    | P4HB 290     | 375  | 3.36508689089   |               |
| NM_000918    | P4HB 1811    | 1864 | 2.1951618819    |               |
| NM_000918    | P4HB 1540    | 1730 | 5.97652160297   |               |
| NM_000918    | P4HB 2245    | 2280 | -0.804844841608 |               |
| NM_000918    | P4HB 1244    | 1406 | 5.70295652964   |               |
| NM_000918    | P4HB 1178    | 1239 | 2.36508689089   |               |
| NM_000918    | P4HB 1061    | 1137 | 2.0025168115    |               |
| NM_000918    | P4HB 1993    | 2056 | 0.780124382618  |               |
| NM_000918    | P4HB 756     | 889  | 5.05314288457   |               |
| NM_000918    | P4HB 951     | 1052 | 3.44308940289   |               |
| NM_000918    | P4HB 500     | 729  | 5.10205248505   |               |
| NM_003934    | FUBP3 57     | 105  | 6.21230539919   |               |
| NM_001336    | CTSZ 868     | 927  | 12.3469468713   |               |
| NM_001336    | CTSZ 302     | 350  | 13.0839124655   |               |
| NM_001336    | CTSZ 761     | 801  | 9.76181062027   |               |
| NM_001336    | CTSZ 930     | 960  | 9.6778451612    |               |
| NM_003938    | AP3D1 4200   | 4244 | 5.19695179821   |               |
| NM_003036    | SKI 337      | 410  | 10.0570025398   |               |
| NM_001164261 | PPIAL4D 531  | 561  | 7.7270412647    |               |
| NM_004309    | ARHGDI A 748 | 816  | 4.17616999727   |               |
| NM_006184    | NUCB1 1366   | 1403 | 4.70464744291   |               |
| NM_006184    | NUCB1 1296   | 1344 | 5.93105746419   |               |
| NM_006184    | NUCB1 1898   | 1943 | 7.12370254236   |               |
| NM_006184    | NUCB1 869    | 958  | 5.93105746442   |               |
| NM_006184    | NUCB1 991    | 1065 | 7.21116538361   |               |
| NM_006184    | NUCB1 439    | 496  | 4.12352879204   |               |
| NM_006184    | NUCB1 625    | 678  | 4.70865831203   |               |

|              |               |       |       |                   |
|--------------|---------------|-------|-------|-------------------|
| NM_006184    | NUCB1         | 500   | 570   | 4.12370253481     |
| NM_006184    | NUCB1         | 775   | 832   | 4.11968494218     |
| NM_006184    | NUCB1         | 2472  | 2545  | 5.12370254214     |
| NM_006184    | NUCB1         | 1093  | 1277  | 7.51601996514     |
| NM_006184    | NUCB1         | 679   | 769   | 5.93105746442     |
| NM_014668    | GREB1         | 6227  | 6247  | 7.45772814632     |
| NM_005570    | LMAN1         | 1366  | 1399  | 4.23827095599     |
| NM_005570    | LMAN1         | 813   | 864   | 5.08644161287     |
| NM_005570    | LMAN1         | 412   | 507   | 5.82340720703     |
| NM_005570    | LMAN1         | 78    | 118   | 3.91249901125     |
| NM_005570    | LMAN1         | 1253  | 1309  | 4.50147911215     |
| NM_005570    | LMAN1         | 894   | 1060  | 6.37594823006     |
| NM_005570    | LMAN1         | 203   | 244   | 4.23442710614     |
| NM_005570    | LMAN1         | 753   | 797   | 3.49746151197     |
| NM_005570    | LMAN1         | 256   | 410   | 6.67140411359     |
| NM_138788    | TMEM45B       | 405   | 449   | 6.88545505179     |
| NM_138788    | TMEM45B       | 491   | 537   | 7.34488667042     |
| NM_138788    | TMEM45B       | 350   | 379   | 6.38627834312     |
| NM_138788    | TMEM45B       | 549   | 593   | 4.88143745161     |
| NM_003752    | EIF3C         | 1750  | 1797  | 4.49470332785     |
| NM_003750    | EIF3A         | 3487  | 3517  | 3.80664612712     |
| NM_003758    | EIF3J         | 128   | 158   | 3.44784953796     |
| NM_001203261 | NDUFC2-KCTD14 |       | 679   | 745 6.35694188148 |
| NM_152637    | METTTL7B      | 567   | 667   | 12.6202383811     |
| NM_152327    | AK7           | 2155  | 2174  | 10.7082895067     |
| NM_032631    | HDGFRP2       | 1267  | 1287  | 6.48737795979     |
| NM_152321    | ERP27         | 370   | 398   | 10.7816667897     |
| NM_138783    | ZNF653        | 130   | 153   | 12.25112383       |
| NM_014342    | MTCH2         | 929   | 958   | 7.18955867989     |
| NM_015284    | SZT2          | 13566 | 13600 | 10.7918115203     |
| NM_015283    | DPY19L1       | 546   | 599   | 8.90356120935     |
| NM_002408    | MGAT2         | 1605  | 1643  | 8.73678446517     |
| NM_001040125 | PQLC2         | 1118  | 1148  | 11.0623688127     |
| NM_001009881 | ZCCHC11       | 73    | 99    | 6.05766442765     |
| NM_001242903 | AKAP1         | 255   | 274   | 4.45407001378     |
| NM_001273    | CHD4          | 5303  | 5369  | 6.2173367988      |
| NM_001273    | CHD4          | 4081  | 4121  | 6.13319782533     |
| NM_001273    | CHD4          | 2122  | 2161  | 5.95028502871     |
| NM_001018054 | LRP8          | 100   | 141   | 8.36725578125     |
| NM_001271    | CHD2          | 959   | 983   | 3.6350816271      |
| NM_001018056 | VLDLR         | 350   | 379   | 6.56401988134     |
| NM_000584    | IL8           | 356   | 397   | 13.1319587245     |
| NM_000584    | IL8           | 166   | 230   | 12.240464593      |
| NM_000584    | IL8           | 293   | 338   | 12.3246038024     |
| NM_000584    | IL8           | 414   | 459   | 10.3205862022     |
| NM_000581    | GPX1          | 90    | 117   | 6.93164148577     |
| NM_001185    | AZGP1         | 441   | 501   | 1.89971898379     |
| NM_001185    | AZGP1         | 162   | 222   | 3.48852533437     |
| NM_001185    | AZGP1         | 787   | 825   | 3.48869908469     |
| NM_001185    | AZGP1         | 379   | 422   | 1.81959737458     |

|              |         |      |      |                 |
|--------------|---------|------|------|-----------------|
| NM_001185    | AZGP1   | 748  | 785  | 1.90373657642   |
| NM_001185    | AZGP1   | 297  | 344  | 2.48468148451   |
| NM_001185    | AZGP1   | 618  | 675  | 0.819597374581  |
| NM_001183    | ATP6AP1 | 450  | 476  | 7.61257632122   |
| NM_001183    | ATP6AP1 | 199  | 247  | 7.394194769     |
| NM_001183    | ATP6AP1 | 1243 | 1278 | 5.80522139916   |
| NM_001183    | ATP6AP1 | 1281 | 1393 | 8.39420150006   |
| NM_001183    | ATP6AP1 | 341  | 402  | 5.80522139916   |
| NM_001183    | ATP6AP1 | 817  | 1028 | 9.97916400078   |
| NM_001143883 | PPIAL4B | 531  | 564  | 7.96150651101   |
| NM_144650    | ADHFE1  | 683  | 702  | 10.3848026701   |
| NM_001009552 | PPP2CB  | 370  | 390  | 4.63282372175   |
| NM_001982    | ERBB3   | 1296 | 1353 | 4.62462313057   |
| NM_001982    | ERBB3   | 2501 | 2536 | 5.5159435117    |
| NM_001982    | ERBB3   | 745  | 823  | 5.70876233995   |
| NM_001174072 | SERINC5 | 1042 | 1066 | 9.00587694989   |
| NM_001135998 | NDUFB11 | 695  | 729  | 4.66541351443   |
| NM_017455    | NPTN    | 649  | 720  | 5.11565171509   |
| NM_017455    | NPTN    | 729  | 801  | 5.37868612093   |
| NM_017455    | NPTN    | 865  | 980  | 5.96364862165   |
| NM_017905    | TMC03   | 1896 | 1961 | 5.42111163625   |
| NM_017905    | TMC03   | 1507 | 1530 | 3.83213154291   |
| NM_017905    | TMC03   | 318  | 360  | 6.64333031482   |
| NM_004249    | RAB28   | 139  | 161  | 6.24247060862   |
| NM_004930    | CAPZB   | 60   | 82   | 4.10648636101   |
| NM_184043    | ALDOA   | 539  | 604  | 1.42691893473   |
| NM_184043    | ALDOA   | 282  | 341  | -0.158050296822 |
| NM_184043    | ALDOA   | 605  | 716  | 2.42691893495   |
| NM_184043    | ALDOA   | 828  | 853  | -1.15821731609  |
| NM_000638    | VTN     | 1490 | 1536 | 6.64806182136   |
| NM_000638    | VTN     | 1307 | 1388 | 8.31791321967   |
| NM_000638    | VTN     | 660  | 727  | 6.51055829761   |
| NM_000638    | VTN     | 1595 | 1650 | 5.18461260255   |
| NM_000638    | VTN     | 404  | 459  | 4.76957510327   |
| NM_000638    | VTN     | 821  | 929  | 8.5809476255    |
| NM_000638    | VTN     | 1008 | 1135 | 7.71219215878   |
| NM_000638    | VTN     | 462  | 513  | 5.68945349406   |
| NM_000638    | VTN     | 1395 | 1471 | 7.94351770489   |
| NM_000638    | VTN     | 1154 | 1215 | 5.18863019518   |
| NM_000638    | VTN     | 942  | 989  | 4.18862347167   |
| NM_000638    | VTN     | 242  | 400  | 6.64806182136   |
| NM_000636    | SOD2    | 220  | 273  | 2.90474957369   |
| NM_003580    | NSMAF   | 152  | 176  | 6.81389519336   |
| NM_025138    | PROSER1 | 536  | 556  | 8.62269406563   |
| NM_025130    | HKDC1   | 2088 | 2149 | 9.31396879649   |
| NM_025130    | HKDC1   | 2174 | 2227 | 8.72900629577   |
| NM_025130    | HKDC1   | 1250 | 1292 | 8.72900629577   |
| NM_025130    | HKDC1   | 721  | 814  | 10.9830705066   |
| NM_025130    | HKDC1   | 658  | 710  | 9.39810776996   |
| NM_025130    | HKDC1   | 1868 | 1904 | 9.31396879649   |



|              |          |      |      |                  |
|--------------|----------|------|------|------------------|
| NM_001123068 | PPIAL4G  | 489  | 519  | 5.52540740375    |
| NM_001079841 | OCIAD1   | 535  | 603  | 8.749306759      |
| NM_001079841 | OCIAD1   | 713  | 753  | 7.16434402236    |
| NM_016334    | GPR89B   | 1301 | 1337 | 8.90969849039    |
| NM_002184    | IL6ST    | 1196 | 1258 | 5.11638572307    |
| NM_002184    | IL6ST    | 1145 | 1180 | 4.11237485395    |
| NM_024989    | PGAP1    | 79   | 111  | 9.04337725953    |
| NM_002360    | MAFK     | 1713 | 1781 | 6.58078405184    |
| NM_002360    | MAFK     | 700  | 723  | 5.58078405184    |
| NM_002360    | MAFK     | 3274 | 3325 | 6.58078405184    |
| NM_006810    | PDIA5    | 609  | 680  | 5.78219483709    |
| NM_006810    | PDIA5    | 897  | 935  | 6.10411620115    |
| NM_006810    | PDIA5    | 850  | 875  | 3.77817723714    |
| NM_021937    | EEFSEC   | 1122 | 1141 | 6.7274027177     |
| NM_021939    | FKBP10   | 747  | 778  | 5.95124253698    |
| NM_021939    | FKBP10   | 1722 | 1775 | 3.36627980789    |
| NM_014838    | ZBED4    | 12   | 36   | 6.70997936969    |
| NM_005321    | HIST1H1E |      | 60   | 108 12.058669479 |
| NM_001009944 | PKD1     | 573  | 632  | 8.89141633138    |
| NM_001046    | SLC12A2  | 2819 | 2880 | 11.1977280668    |
| NM_001046    | SLC12A2  | 2902 | 2952 | 9.97533564549    |
| NM_001046    | SLC12A2  | 3211 | 3271 | 10.9713180453    |
| NM_001046    | SLC12A2  | 3353 | 3381 | 9.97131804532    |
| NM_001046    | SLC12A2  | 1055 | 1126 | 11.7123012397    |
| NM_001046    | SLC12A2  | 587  | 633  | 11.9753356453    |
| NM_001046    | SLC12A2  | 2336 | 2426 | 11.9753356455    |
| NM_001046    | SLC12A2  | 1650 | 1677 | 10.3863555446    |
| NM_001046    | SLC12A2  | 2997 | 3066 | 11.9753356455    |
| NM_001046    | SLC12A2  | 1186 | 1218 | 11.3903729089    |
| NM_001046    | SLC12A2  | 3275 | 3342 | 11.3903731448    |
| NM_001046    | SLC12A2  | 801  | 847  | 9.97532891444    |
| NM_001046    | SLC12A2  | 449  | 501  | 10.7123012397    |
| NM_001046    | SLC12A2  | 3397 | 3434 | 9.39037290885    |
| NM_001046    | SLC12A2  | 2737 | 2803 | 12.6383006582    |
| NM_001046    | SLC12A2  | 2451 | 2480 | 9.39037290885    |
| NM_001046    | SLC12A2  | 2537 | 2651 | 13.0342293345    |
| NM_001046    | SLC12A2  | 3687 | 3711 | 9.89119643611    |
| NM_001046    | SLC12A2  | 1567 | 1643 | 9.39037314477    |
| NM_001046    | SLC12A2  | 1753 | 1823 | 10.3903731448    |
| NM_001046    | SLC12A2  | 634  | 712  | 11.1977280668    |
| NM_001046    | SLC12A2  | 1398 | 1482 | 11.1977280668    |
| NM_001046    | SLC12A2  | 25   | 176  | 11.8498047634    |
| NM_001046    | SLC12A2  | 2097 | 2180 | 10.7123012397    |
| NM_001046    | SLC12A2  | 1276 | 1352 | 12.9753356455    |
| NM_001046    | SLC12A2  | 887  | 1052 | 11.9753356455    |
| NM_004039    | ANXA2    | 494  | 578  | 2.89755316636    |
| NM_004039    | ANXA2    | 594  | 678  | 3.31259066564    |
| NM_004749    | TBRG4    | 1018 | 1065 | 6.50883323014    |
| NM_022356    | LEPRE1   | 1726 | 1755 | 6.79702424619    |
| NM_022356    | LEPRE1   | 692  | 726  | 6.21206174547    |

|              |         |      |      |               |
|--------------|---------|------|------|---------------|
| NM_022356    | LEPRE1  | 728  | 760  | 7.2160793381  |
| NM_016086    | STYXL1  | 240  | 262  | 10.0717557143 |
| NM_001903    | CTNNA1  | 1150 | 1187 | 3.12378618246 |
| NM_001903    | CTNNA1  | 938  | 1008 | 4.52984675567 |
| NM_000935    | PL0D2   | 1818 | 1872 | 2.98327063582 |
| NM_000935    | PL0D2   | 1737 | 1792 | 3.56823290817 |
| NM_000935    | PL0D2   | 2087 | 2131 | 2.56823313654 |
| NM_000935    | PL0D2   | 1574 | 1655 | 3.30519873803 |
| NM_000935    | PL0D2   | 1894 | 1939 | 2.56421554392 |
| NM_007214    | SEC63   | 1010 | 1063 | 4.13316995053 |
| NM_007214    | SEC63   | 1436 | 1459 | 4.13316995053 |
| NM_007214    | SEC63   | 855  | 911  | 2.62832905902 |
| NM_007214    | SEC63   | 168  | 253  | 4.2171354096  |
| NM_000938    | POLR2B  | 43   | 73   | 4.87242395904 |
| NM_014498    | GOLIM4  | 2359 | 2415 | 5.41007275196 |
| NM_014498    | GOLIM4  | 1387 | 1421 | 4.72798324689 |
| NM_014498    | GOLIM4  | 1055 | 1102 | 3.406055152   |
| NM_014498    | GOLIM4  | 1888 | 1932 | 4.406055152   |
| NM_014498    | GOLIM4  | 850  | 893  | 4.41006602112 |
| NM_024729    | MYH14   | 234  | 297  | 10.183937827  |
| NM_000504    | F10     | 1337 | 1384 | 1.76289526715 |
| NM_000504    | F10     | 819  | 868  | 2.76690613627 |
| NM_000504    | F10     | 1055 | 1154 | 4.76691286732 |
| NM_000504    | F10     | 909  | 977  | 2.68277365794 |
| NM_000504    | F10     | 487  | 527  | 4.34785776787 |
| NM_000504    | F10     | 656  | 720  | 4.08884096221 |
| NM_005516    | HLA-E   | 1046 | 1116 | 7.33457990254 |
| NM_005516    | HLA-E   | 254  | 290  | 3.87113068373 |
| NM_005516    | HLA-E   | 538  | 592  | 6.19706964773 |
| NM_005516    | HLA-E   | 859  | 944  | 7.04507328534 |
| NM_005516    | HLA-E   | 743  | 840  | 6.68250320596 |
| NM_005514    | HLA-B   | 1007 | 1057 | 5.54601327655 |
| NM_005514    | HLA-B   | 409  | 457  | 5.54601327633 |
| NM_005514    | HLA-B   | 340  | 378  | 5.86776762112 |
| NM_005514    | HLA-B   | 473  | 532  | 5.13097577727 |
| NM_005514    | HLA-B   | 532  | 584  | 5.54601304063 |
| NM_005514    | HLA-B   | 1092 | 1141 | 5.13097576972 |
| NM_005514    | HLA-B   | 619  | 654  | 3.54199567637 |
| NM_005514    | HLA-B   | 191  | 218  | 5.13097577705 |
| NM_005514    | HLA-B   | 850  | 893  | 3.54583952623 |
| NM_005514    | HLA-B   | 715  | 833  | 6.13097577727 |
| NM_006306    | SMC1A   | 1311 | 1368 | 4.39696395546 |
| NM_006306    | SMC1A   | 3461 | 3509 | 4.47708556467 |
| NM_006304    | SHFM1   | 194  | 284  | 2.78960359349 |
| NM_152305    | POGLUT1 | 616  | 642  | 8.65886303123 |
| NM_001185076 | FMR1    | 98   | 159  | 4.7199753375  |
| NM_001185073 | CLDN12  | 302  | 337  | 8.18995602619 |
| NM_001185073 | CLDN12  | 878  | 907  | 8.18995602619 |
| NM_001185073 | CLDN12  | 812  | 851  | 8.10983441698 |
| NM_001185073 | CLDN12  | 765  | 804  | 7.18995602619 |

|              |         |      |      |                  |
|--------------|---------|------|------|------------------|
| NM_001037637 | BTF3    | 165  | 186  | -0.0326984888895 |
| NM_001037637 | BTF3    | 788  | 842  | 0.8871799019     |
| NM_002796    | PSMB4   | 642  | 695  | 5.95364984657    |
| NM_002796    | PSMB4   | 521  | 551  | 4.36868734585    |
| NM_018834    | MATR3   | 2359 | 2385 | 2.90216446308    |
| NM_018834    | MATR3   | 1170 | 1217 | 3.39732357157    |
| NM_018834    | MATR3   | 894  | 926  | 2.90216446308    |
| NM_015510    | DHRS7B  | 690  | 744  | 9.22545522708    |
| NM_015510    | DHRS7B  | 891  | 933  | 9.22545522708    |
| NM_015510    | DHRS7B  | 937  | 984  | 9.55636024803    |
| NM_002428    | MMP15   | 2820 | 2853 | 6.50660395257    |
| NM_019616    | F7      | 752  | 808  | 7.99564521003    |
| NM_019616    | F7      | 1140 | 1205 | 7.72859321157    |
| NM_019616    | F7      | 939  | 988  | 5.4106759858     |
| NM_019616    | F7      | 420  | 492  | 7.99547146726    |
| NM_019616    | F7      | 1057 | 1096 | 5.32654350747    |
| NM_001136196 | TNPO2   | 3016 | 3042 | 9.79912982678    |
| NM_138330    | ZNF675  | 371  | 393  | 9.44467990571    |
| NM_138333    | FAM122A | 178  | 209  | 9.39438725876    |
| NM_014711    | CCP110  | 2078 | 2098 | 4.960812268      |
| NM_001216    | CA9     | 1128 | 1173 | 6.44586966036    |
| NM_001212    | C1QBP   | 644  | 687  | 0.162006137763   |
| NM_030918    | SNX27   | 70   | 92   | 7.11706933226    |
| NM_017617    | NOTCH1  | 4651 | 4701 | 14.9209093834    |
| NM_004482    | GALNT3  | 1302 | 1344 | 12.9931449373    |
| NM_004482    | GALNT3  | 865  | 909  | 12.2561726197    |
| NM_004482    | GALNT3  | 1986 | 2029 | 10.6712168424    |
| NM_004482    | GALNT3  | 1689 | 1722 | 11.6710430997    |
| NM_004482    | GALNT3  | 786  | 841  | 13.2561793432    |
| NM_012201    | GLG1    | 798  | 843  | 4.31237766052    |
| NM_012201    | GLG1    | 2315 | 2354 | 6.81889560122    |
| NM_012201    | GLG1    | 1986 | 2030 | 5.73125900965    |
| NM_012201    | GLG1    | 604  | 644  | 5.73143275997    |
| NM_012201    | GLG1    | 3386 | 3417 | 5.31638852964    |
| NM_012201    | GLG1    | 3520 | 3567 | 4.31639525314    |
| NM_012201    | GLG1    | 34   | 87   | 5.53878768181    |
| NM_012201    | GLG1    | 2642 | 2706 | 5.31639526069    |
| NM_012201    | GLG1    | 2359 | 2391 | 3.7274151598     |
| NM_012201    | GLG1    | 2147 | 2171 | 2.64729355059    |
| NM_012201    | GLG1    | 1337 | 1391 | 4.73125900965    |
| NM_012201    | GLG1    | 3433 | 3461 | 3.7274151598     |
| NM_012201    | GLG1    | 913  | 976  | 4.31237766052    |
| NM_012201    | GLG1    | 2177 | 2216 | 2.73125900965    |
| NM_012201    | GLG1    | 397  | 528  | 6.05336085486    |
| NM_012201    | GLG1    | 1601 | 1708 | 6.43187247811    |
| NM_012201    | GLG1    | 3039 | 3101 | 5.31622151038    |
| NM_004486    | GOLGA2  | 29   | 51   | 6.57091406182    |
| NM_006938    | SNRPD1  | 108  | 157  | 3.46264380103    |
| NM_000039    | APOA1   | 426  | 466  | -2.77410199357   |
| NM_000039    | APOA1   | 339  | 425  | 1.47382575579    |

|           |         |      |      |                 |
|-----------|---------|------|------|-----------------|
| NM_000039 | APOA1   | 113  | 202  | 0.395823243791  |
| NM_000039 | APOA1   | 861  | 884  | -1.18931300725  |
| NM_000039 | APOA1   | 236  | 290  | -0.189139492849 |
| NM_000039 | APOA1   | 506  | 557  | -1.77427550797  |
| NM_000039 | APOA1   | 765  | 813  | -0.452173670314 |
| NM_182715 | SYPL1   | 673  | 713  | 9.1694798983    |
| NM_182715 | SYPL1   | 599  | 620  | 6.76341260158   |
| NM_182715 | SYPL1   | 451  | 479  | 6.76341260158   |
| NM_182715 | SYPL1   | 489  | 547  | 10.0174768124   |
| NM_003211 | TDG     | 2855 | 2886 | 6.38609114524   |
| NM_003217 | TMBIM6  | 915  | 945  | 5.51209745389   |
| NM_003217 | TMBIM6  | 239  | 280  | 6.24923656246   |
| NM_003217 | TMBIM6  | 54   | 165  | 7.8341992991    |
| NM_003217 | TMBIM6  | 860  | 893  | 5.92329110332   |
| NM_003217 | TMBIM6  | 291  | 456  | 9.51227120421   |
| NM_003217 | TMBIM6  | 485  | 849  | 10.6138092307   |
| NM_203459 | CAMSAP2 | 57   | 85   | 6.83193475486   |
| NM_207520 | RTN4    | 1171 | 1224 | 8.38306806037   |
| NM_207520 | RTN4    | 912  | 967  | 7.79810555965   |
| NM_207520 | RTN4    | 1116 | 1158 | 6.06096621517   |
| NM_207520 | RTN4    | 1524 | 1595 | 5.47215986459   |
| NM_207520 | RTN4    | 1230 | 1423 | 9.12003365454   |
| NM_207520 | RTN4    | 614  | 690  | 5.47617073371   |
| NM_207520 | RTN4    | 367  | 596  | 9.52057158412   |
| NM_198576 | AGRN    | 5079 | 5138 | 9.50899431386   |
| NM_198576 | AGRN    | 2564 | 2673 | 9.17195932658   |
| NM_198576 | AGRN    | 2747 | 2811 | 8.38346343178   |
| NM_198576 | AGRN    | 3542 | 3595 | 8.09395681458   |
| NM_198576 | AGRN    | 4068 | 4107 | 7.92403180559   |
| NM_198576 | AGRN    | 3351 | 3433 | 8.09395681458   |
| NM_198576 | AGRN    | 5363 | 5404 | 7.16182069864   |
| NM_198576 | AGRN    | 458  | 534  | 9.17195932658   |
| NM_198576 | AGRN    | 6760 | 6827 | 6.50497671369   |
| NM_198576 | AGRN    | 3872 | 3917 | 7.73138649928   |
| NM_198576 | AGRN    | 6344 | 6395 | 7.7313867352    |
| NM_198576 | AGRN    | 6648 | 6718 | 7.24194230786   |
| NM_198576 | AGRN    | 1137 | 1192 | 8.83092240875   |
| NM_198576 | AGRN    | 5896 | 5946 | 5.92402508209   |
| NM_198576 | AGRN    | 4979 | 5064 | 7.7313867352    |
| NM_198576 | AGRN    | 980  | 1008 | 6.92385806282   |
| NM_198576 | AGRN    | 6477 | 6549 | 7.42485510448   |
| NM_198576 | AGRN    | 1345 | 1387 | 6.42485510448   |
| NM_198576 | AGRN    | 1576 | 1640 | 6.92402508209   |
| NM_198576 | AGRN    | 6607 | 6648 | 8.09395681436   |
| NM_198576 | AGRN    | 4239 | 4274 | 5.83989260376   |
| NM_198576 | AGRN    | 1450 | 1559 | 8.09395681458   |
| NM_198576 | AGRN    | 3774 | 3830 | 8.62447153128   |
| NM_198576 | AGRN    | 2510 | 2554 | 7.92403181314   |
| NM_198576 | AGRN    | 320  | 350  | 6.50882056354   |
| NM_198576 | AGRN    | 3089 | 3142 | 8.09395681436   |

|              |          |      |      |                    |
|--------------|----------|------|------|--------------------|
| NM_198576    | AGRN     | 4650 | 4702 | 8.09395681458      |
| NM_198576    | AGRN     | 2974 | 3035 | 8.92403181314      |
| NM_198576    | AGRN     | 4546 | 4605 | 6.50898758281      |
| NM_198576    | AGRN     | 7215 | 7261 | 6.92403157722      |
| NM_198576    | AGRN     | 3442 | 3495 | 6.50899407794      |
| NM_198576    | AGRN     | 376  | 434  | 7.50899431364      |
| NM_198576    | AGRN     | 1076 | 1134 | 7.42485510448      |
| NM_198576    | AGRN     | 6255 | 6300 | 5.92402508209      |
| NM_198576    | AGRN     | 6076 | 6149 | 8.62447153128      |
| NM_198576    | AGRN     | 1647 | 1759 | 7.24595990803      |
| NM_198576    | AGRN     | 5999 | 6058 | 6.50899431364      |
| NM_198576    | AGRN     | 2047 | 2214 | 9.92403181314      |
| NM_198576    | AGRN     | 1222 | 1313 | 8.09395680703      |
| NM_198576    | AGRN     | 3200 | 3308 | 9.09395681458      |
| NM_198576    | AGRN     | 6854 | 6905 | 4.92001421297      |
| NM_198576    | AGRN     | 5565 | 5719 | 9.87822812353      |
| NM_198576    | AGRN     | 5724 | 5843 | 8.09395681458      |
| NM_198576    | AGRN     | 155  | 233  | 6.92403181314      |
| NM_198576    | AGRN     | 1812 | 1957 | 9.7313867352       |
| NM_198576    | AGRN     | 235  | 315  | 8.09395681458      |
| NM_198576    | AGRN     | 4747 | 4840 | 8.24595990803      |
| NM_198576    | AGRN     | 4417 | 4544 | 7.92403181314      |
| NM_198576    | AGRN     | 3598 | 3677 | 5.92403181292      |
| NM_022834    | VWA1     | 765  | 857  | 11.9828855378      |
| NM_022834    | VWA1     | 1909 | 1962 | 10.7198444009      |
| NM_022834    | VWA1     | 1816 | 1883 | 9.31378382768      |
| NM_022834    | VWA1     | 1002 | 1072 | 11.8573546557      |
| NM_022834    | VWA1     | 927  | 970  | 10.7198511317      |
| NM_020470    | YIF1A    | 833  | 912  | 7.15567988258      |
| NM_020474    | GALNT1   | 1189 | 1239 | 8.83998385169      |
| NM_020474    | GALNT1   | 1778 | 1821 | 7.61357383018      |
| NM_020474    | GALNT1   | 984  | 1046 | 7.83981010137      |
| NM_198793    | CD47     | 1092 | 1138 | 10.4422033432      |
| NM_198793    | CD47     | 913  | 969  | 11.7487349739      |
| NM_001199867 | MARK4    | 329  | 377  | 7.58743708128      |
| NM_013346    | SNX12    | 543  | 565  | 7.27645195608      |
| NM_144497    | AKAP12   | 5455 | 5474 | 4.39894784803      |
| NM_001130963 | TMEM194A |      | 1104 | 1149 9.55670361605 |
| NM_014580    | SLC2A8   | 551  | 610  | 9.3527642657       |
| NM_014580    | SLC2A8   | 423  | 466  | 9.61579867131      |
| NM_014580    | SLC2A8   | 612  | 663  | 8.61579194048      |
| NM_014580    | SLC2A8   | 957  | 1065 | 9.61579867153      |
| NM_014580    | SLC2A8   | 298  | 369  | 8.03083616326      |
| NM_014585    | SLC40A1  | 14   | 42   | 5.58703339627      |
| NM_014584    | ER01L    | 623  | 689  | 5.91172432731      |
| NM_014584    | ER01L    | 492  | 529  | 5.91172409139      |
| NM_014584    | ER01L    | 1644 | 1693 | 4.32675509553      |
| NM_014584    | ER01L    | 163  | 208  | 4.91155057699      |
| NM_014584    | ER01L    | 925  | 953  | 3.2426226172       |
| NM_014584    | ER01L    | 1308 | 1479 | 7.2336524222       |

|              |         |      |      |                 |
|--------------|---------|------|------|-----------------|
| NM_014584    | ER01L   | 1023 | 1115 | 5.32676182659   |
| NM_005654    | NR2F1   | 1772 | 1799 | 7.17951415256   |
| NM_014752    | SPCS2   | 45   | 127  | 3.89528298433   |
| NM_014752    | SPCS2   | 628  | 672  | 4.89528322002   |
| NM_014752    | SPCS2   | 860  | 922  | 3.89126562007   |
| NM_152519    | C2orf67 | 0    | 38   | 8.34804282033   |
| NM_000232    | SGCB    | 925  | 953  | 9.3323672261    |
| NM_001134368 | SLC6A6  | 698  | 758  | 8.5268668827    |
| NM_033487    | CDK11B  | 147  | 179  | 5.7110661157    |
| NM_001026    | RPS24   | 369  | 429  | 0.420016568332  |
| NM_001026    | RPS24   | 89   | 150  | -1.07915990441  |
| NM_001026    | RPS24   | 534  | 588  | -1.5799899268   |
| NM_001026    | RPS24   | 434  | 501  | -2.66412240513  |
| NM_001024    | RPS21   | 329  | 373  | -0.270051167904 |
| NM_001024    | RPS21   | 94   | 146  | 2.05187692698   |
| NM_001025    | RPS23   | 90   | 145  | -0.391967063178 |
| NM_001025    | RPS23   | 351  | 379  | -1.39196706318  |
| NM_001022    | RPS19   | 369  | 436  | 2.77471782873   |
| NM_001022    | RPS19   | 438  | 489  | -0.894383881372 |
| NM_001022    | RPS19   | 596  | 624  | -0.814262272161 |
| NM_001022    | RPS19   | 664  | 791  | 2.35968032945   |
| NM_001023    | RPS20   | 280  | 317  | 0.227969985111  |
| NM_001020    | RPS16   | 178  | 208  | 3.45989707535   |
| NM_001020    | RPS16   | 427  | 464  | 2.45989034452   |
| NM_001020    | RPS16   | 105  | 178  | 4.26725199763   |
| NM_001028    | RPS25   | 17   | 130  | 0.636238918898  |
| NM_001029    | RPS26   | 510  | 560  | 2.26274659565   |
| NM_001166114 | PNPLA6  | 749  | 784  | 9.49362375604   |
| NM_001247    | ENTPD6  | 1403 | 1441 | 4.44813301001   |
| NM_001247    | ENTPD6  | 2343 | 2429 | 7.11722798906   |
| NM_016200    | NAA38   | 7084 | 7104 | 5.4989777544    |
| NM_001080975 | REPS2   | 47   | 86   | 12.7292299304   |
| NM_001249    | ENTPD5  | 1307 | 1339 | 4.96166477442   |
| NM_001539    | DNAJA1  | 902  | 961  | 3.08622185312   |
| NM_001532    | SLC29A2 | 841  | 884  | 11.0178882152   |
| NM_001532    | SLC29A2 | 990  | 1025 | 12.0180617296   |
| NM_001532    | SLC29A2 | 1243 | 1286 | 11.4330927338   |
| NM_001532    | SLC29A2 | 1091 | 1146 | 12.1563151775   |
| NM_007270    | FKBP9   | 1201 | 1247 | 6.71622494573   |
| NM_007270    | FKBP9   | 752  | 797  | 7.04712347154   |
| NM_007270    | FKBP9   | 1358 | 1447 | 7.71622518165   |
| NM_007270    | FKBP9   | 1447 | 1497 | 8.12724508075   |
| NM_007270    | FKBP9   | 398  | 481  | 8.30118744645   |
| NM_194247    | HNRNPA3 | 401  | 436  | 1.96710800362   |
| NM_020665    | TMEM27  | 773  | 813  | 10.8152047106   |
| NM_024743    | UGT2A3  | 289  | 331  | 6.99810586183   |
| NM_024743    | UGT2A3  | 755  | 817  | 5.99810586183   |
| NM_024743    | UGT2A3  | 921  | 957  | 3.82818086038   |
| NM_024743    | UGT2A3  | 1065 | 1096 | 2.82800711007   |
| NM_024743    | UGT2A3  | 1138 | 1177 | 4.41314336088   |

|              |         |      |      |               |
|--------------|---------|------|------|---------------|
| NM_024743    | UGT2A3  | 1495 | 1547 | 3.82818086038 |
| NM_024743    | UGT2A3  | 1289 | 1323 | 4.41314312519 |
| NM_024743    | UGT2A3  | 844  | 884  | 4.40912576093 |
| NM_024743    | UGT2A3  | 444  | 523  | 5.4131433611  |
| NM_024743    | UGT2A3  | 524  | 590  | 5.63553578244 |
| NM_173601    | GXYLT1  | 3315 | 3334 | 7.93211041564 |
| NM_173601    | GXYLT1  | 1163 | 1201 | 8.41753724281 |
| NM_139030    | CD151   | 35   | 77   | 4.1062940025  |
| NM_139030    | CD151   | 628  | 671  | 7.276225735   |
| NM_139030    | CD151   | 734  | 792  | 7.10630073356 |
| NM_139030    | CD151   | 185  | 223  | 5.69126299836 |
| NM_139030    | CD151   | 556  | 588  | 6.10630073355 |
| NM_139030    | CD151   | 793  | 850  | 4.10228313338 |
| NM_139030    | CD151   | 427  | 522  | 8.01319132917 |
| NM_139030    | CD151   | 271  | 416  | 8.75015692333 |
| NM_145918    | CTSL1   | 1023 | 1063 | 4.74572654185 |
| NM_145918    | CTSL1   | 540  | 592  | 4.74589356112 |
| NM_145918    | CTSL1   | 605  | 687  | 6.06782838706 |
| NM_001105539 | ZBTB10  | 571  | 596  | 5.75067264771 |
| NM_207311    | CCDC64  | 346  | 424  | 9.30606268224 |
| NM_005827    | SLC35B1 | 648  | 681  | 8.66511912251 |
| NM_005827    | SLC35B1 | 985  | 1045 | 8.33917366337 |
| NM_005827    | SLC35B1 | 519  | 579  | 8.34319126332 |
| NM_006320    | PGRMC2  | 1475 | 1516 | 5.51110932487 |
| NM_006320    | PGRMC2  | 1029 | 1089 | 6.09607182559 |
| NM_006320    | PGRMC2  | 2756 | 2814 | 6.31846424692 |
| NM_001127453 | DFNA5   | 308  | 326  | 5.93550771473 |
| NM_015578    | LSM14A  | 1070 | 1093 | 3.49547361805 |
| NM_001142936 | DAGLB   | 859  | 914  | 9.26173923085 |
| NM_001142936 | DAGLB   | 1011 | 1065 | 10.6678065349 |
| NM_001142936 | DAGLB   | 947  | 992  | 11.5157967106 |
| NM_001142936 | DAGLB   | 405  | 449  | 9.84670173157 |
| NM_001142936 | DAGLB   | 299  | 374  | 11.1532333547 |
| NM_002444    | MSN     | 1537 | 1612 | 10.6077129538 |
| NM_170725    | PGBD2   | 403  | 422  | 8.91534421338 |
| NM_020150    | SAR1A   | 719  | 755  | 6.38501571095 |
| NM_138319    | PCSK6   | 189  | 227  | 5.01189790295 |
| NM_004587    | RRBP1   | 1938 | 1986 | 4.8118619473  |
| NM_004587    | RRBP1   | 2369 | 2469 | 4.81186844243 |
| NM_004587    | RRBP1   | 3057 | 3122 | 4.32644185118 |
| NM_004587    | RRBP1   | 1474 | 1526 | 5.17443852182 |
| NM_004587    | RRBP1   | 3655 | 3699 | 2.92037454691 |
| NM_004587    | RRBP1   | 75   | 148  | 4.00451374875 |
| NM_004587    | RRBP1   | 296  | 341  | 4.00450702524 |
| NM_004587    | RRBP1   | 2486 | 2596 | 5.32644185118 |
| NM_004587    | RRBP1   | 2173 | 2253 | 5.46394537493 |
| NM_004587    | RRBP1   | 685  | 788  | 5.46394537493 |
| NM_004587    | RRBP1   | 533  | 611  | 5.32644185118 |
| NM_001207066 | CXADR   | 662  | 698  | 6.77964943275 |
| NM_001207066 | CXADR   | 820  | 892  | 7.26508299097 |

|              |         |      |      |                |
|--------------|---------|------|------|----------------|
| NM_001207066 | CXADR   | 953  | 1008 | 6.77965592789  |
| NM_021103    | TMSB10  | 322  | 423  | 0.261304306115 |
| NM_021101    | CLDN1   | 173  | 220  | 7.52044397963  |
| NM_021101    | CLDN1   | 711  | 832  | 10.4273345752  |
| NM_021101    | CLDN1   | 244  | 328  | 8.2574095738   |
| NM_021101    | CLDN1   | 653  | 702  | 7.52044397963  |
| NM_021101    | CLDN1   | 485  | 645  | 10.6359211971  |
| NM_021101    | CLDN1   | 1894 | 1929 | 7.17327036442  |
| NM_021101    | CLDN1   | 851  | 965  | 8.2574095738   |
| NM_021101    | CLDN1   | 338  | 472  | 9.84237207453  |
| NM_021109    | TMSB4X  | 30   | 92   | 2.20603516273  |
| NM_004461    | FARSA   | 808  | 849  | 6.27007407079  |
| NM_001943    | DSG2    | 406  | 447  | 5.1990094655   |
| NM_001943    | DSG2    | 500  | 529  | 3.11888785629  |
| NM_001943    | DSG2    | 2209 | 2292 | 5.1990094655   |
| NM_001943    | DSG2    | 330  | 390  | 5.78798283534  |
| NM_001943    | DSG2    | 2726 | 2755 | 3.1990094655   |
| NM_001943    | DSG2    | 213  | 258  | 4.11888785629  |
| NM_001943    | DSG2    | 644  | 702  | 5.1990094655   |
| NM_004467    | FGL1    | 303  | 340  | 0.864541789065 |
| NM_004467    | FGL1    | 440  | 553  | 6.11246953843  |
| NM_004467    | FGL1    | 153  | 208  | 4.56498174313  |
| NM_004467    | FGL1    | 611  | 655  | 3.4495045257   |
| NM_004467    | FGL1    | 932  | 1027 | 5.81873833537  |
| NM_004467    | FGL1    | 557  | 601  | 3.18647011965  |
| NM_004467    | FGL1    | 1213 | 1268 | 2.44950452548  |
| NM_004467    | FGL1    | 40   | 101  | 4.03446702642  |
| NM_004467    | FGL1    | 769  | 929  | 6.81873833537  |
| NM_004467    | FGL1    | 674  | 766  | 5.03446702643  |
| NM_001497    | B4GALT1 | 1281 | 1323 | 8.17079846634  |
| NM_001497    | B4GALT1 | 910  | 956  | 8.84887037146  |
| NM_016240    | SCARA3  | 1270 | 1292 | 7.73392091946  |
| NM_201413    | APP     | 598  | 641  | 4.13418730434  |
| NM_201413    | APP     | 1511 | 1622 | 5.60811849267  |
| NM_201413    | APP     | 53   | 95   | 2.96425557184  |
| NM_201413    | APP     | 399  | 455  | 4.42369392153  |
| NM_201413    | APP     | 1253 | 1308 | 5.05172514415  |
| NM_201413    | APP     | 1435 | 1510 | 3.54922480362  |
| NM_201413    | APP     | 2430 | 2495 | 3.77161722495  |
| NM_201413    | APP     | 1631 | 1673 | 1.96425557184  |
| NM_201413    | APP     | 1350 | 1420 | 3.54922480362  |
| NM_201413    | APP     | 693  | 1029 | 7.97548955832  |
| NM_201413    | APP     | 2239 | 2315 | 2.54922480362  |
| NM_201413    | APP     | 2958 | 3028 | 2.5490510533   |
| NM_201413    | APP     | 1790 | 2042 | 6.82224329802  |
| NM_201413    | APP     | 204  | 322  | 5.05172514415  |
| NM_201413    | APP     | 1032 | 1228 | 7.3905270576   |
| NM_201413    | APP     | 2043 | 2198 | 6.74562201642  |
| NM_201413    | APP     | 1683 | 1789 | 3.28619039778  |
| NM_201413    | APP     | 105  | 172  | 4.13418730434  |



|           |         |      |      |                  |
|-----------|---------|------|------|------------------|
| NM_000014 | A2M     | 4222 | 4293 | 4.136297975      |
| NM_000014 | A2M     | 3238 | 3277 | 2.2187601352     |
| NM_000014 | A2M     | 4047 | 4106 | 2.85619005581    |
| NM_000014 | A2M     | 3195 | 3232 | -0.0353040756306 |
| NM_000014 | A2M     | 1355 | 1441 | 3.57239708981    |
| NM_000014 | A2M     | 2292 | 2394 | 4.04883513375    |
| NM_000014 | A2M     | 4297 | 4373 | 3.69269132353    |
| NM_000014 | A2M     | 2093 | 2186 | 2.74927485189    |
| NM_000014 | A2M     | 1076 | 1138 | 2.85619005581    |
| NM_000014 | A2M     | 3423 | 3462 | 3.2187601352     |
| NM_000014 | A2M     | 335  | 397  | 2.95572572936    |
| NM_000014 | A2M     | 434  | 511  | 3.44115255653    |
| NM_000014 | A2M     | 3140 | 3170 | 1.37076322109    |
| NM_000014 | A2M     | 226  | 328  | 3.95572572936    |
| NM_000014 | A2M     | 519  | 593  | 3.136297975      |
| NM_000014 | A2M     | 720  | 762  | 1.04866138344    |
| NM_000014 | A2M     | 4381 | 4544 | 5.136297975      |
| NM_000014 | A2M     | 4545 | 4642 | 2.63379763447    |
| NM_000014 | A2M     | 2191 | 2283 | 3.69269132353    |
| NM_000014 | A2M     | 1683 | 1831 | 4.74927485189    |
| NM_000014 | A2M     | 877  | 1000 | 4.57239708981    |
| NM_000014 | A2M     | 126  | 166  | 0.629780034301   |
| NM_000014 | A2M     | 2692 | 2804 | 4.25828849938    |
| NM_000014 | A2M     | 3014 | 3064 | 1.04883513353    |
| NM_000014 | A2M     | 3970 | 4028 | -0.95518246642   |
| NM_000014 | A2M     | 833  | 874  | -0.951338616565  |
| NM_000014 | A2M     | 2401 | 2537 | 4.40638713837    |
| NM_000014 | A2M     | 3867 | 3956 | 4.136297975      |
| NM_000014 | A2M     | 1883 | 2087 | 5.136297975      |
| NM_000014 | A2M     | 1261 | 1345 | 1.85619005581    |
| NM_000014 | A2M     | 39   | 76   | 0.633790903421   |
| NM_000014 | A2M     | 3583 | 3671 | 3.04883513375    |
| NM_000014 | A2M     | 1162 | 1235 | 2.74927485189    |
| NM_000014 | A2M     | 3314 | 3411 | 3.74927485189    |
| NM_000014 | A2M     | 2569 | 2691 | 3.04883513375    |
| NM_000014 | A2M     | 2804 | 2989 | 4.69269132353    |
| NM_000014 | A2M     | 4134 | 4204 | 2.37076322864    |
| NM_000014 | A2M     | 3739 | 3836 | 2.85619005581    |
| NM_000014 | A2M     | 1451 | 1679 | 5.27765382425    |
| NM_000543 | SMPD1   | 1341 | 1381 | 10.9885775302    |
| NM_133475 | ANKRD24 | 1091 | 1113 | 11.1796932677    |
| NM_000544 | TAP2    | 1515 | 1548 | 7.84567464251    |
| NM_000544 | TAP2    | 506  | 544  | 7.84968551163    |
| NM_000545 | HNF1A   | 207  | 251  | 6.57352817379    |
| NM_030930 | UNC93B1 | 1173 | 1218 | 10.8212990598    |
| NM_030930 | UNC93B1 | 1429 | 1470 | 9.81728145967    |
| NM_000018 | ACADVL  | 1550 | 1590 | 5.44601986404    |
| NM_000018 | ACADVL  | 1518 | 1544 | 3.44618688331    |
| NM_000018 | ACADVL  | 1951 | 2004 | 5.9470169057     |
| NM_017946 | FKBP14  | 548  | 581  | 8.16311364612    |

|              |         |      |      |                |
|--------------|---------|------|------|----------------|
| NM_017946    | FKBP14  | 738  | 770  | 8.90025275469  |
| NM_003897    | IER3    | 428  | 479  | 6.57339688874  |
| NM_003897    | IER3    | 1179 | 1218 | 5.79561555976  |
| NM_003897    | IER3    | 881  | 922  | 4.98441678784  |
| NM_003897    | IER3    | 923  | 977  | 5.31018873259  |
| NM_003897    | IER3    | 487  | 524  | 2.90429517863  |
| NM_203304    | MEX3D   | 43   | 77   | 10.2784937679  |
| NM_203304    | MEX3D   | 181  | 226  | 11.596578013   |
| NM_017948    | NOL8    | 196  | 214  | 5.80215350487  |
| NM_004207    | SLC16A3 | 1027 | 1078 | 3.44272516251  |
| NM_004207    | SLC16A3 | 168  | 236  | 6.44272516251  |
| NM_004203    | PKMYT1  | 1463 | 1523 | 12.0614066953  |
| NM_004208    | AIFM1   | 1614 | 1657 | 6.31970500994  |
| NM_198551    | MIA3    | 4096 | 4128 | 6.6096669578   |
| NM_198551    | MIA3    | 2979 | 3062 | 6.37187806474  |
| NM_198551    | MIA3    | 237  | 284  | 6.36786047212  |
| NM_020410    | ATP13A1 | 771  | 821  | 9.66448217839  |
| NM_020410    | ATP13A1 | 1797 | 1851 | 10.6644821859  |
| NM_020410    | ATP13A1 | 1332 | 1362 | 8.25841488167  |
| NM_020410    | ATP13A1 | 3400 | 3491 | 9.66046458577  |
| NM_020410    | ATP13A1 | 511  | 536  | 8.25841488167  |
| NM_020410    | ATP13A1 | 2626 | 2676 | 9.66430843562  |
| NM_020410    | ATP13A1 | 1608 | 1707 | 9.92751659178  |
| NM_020410    | ATP13A1 | 3171 | 3246 | 10.6644821859  |
| NM_020410    | ATP13A1 | 1409 | 1533 | 10.9275165918  |
| NM_025179    | PLXNA2  | 1175 | 1196 | 11.1316017535  |
| NM_145059    | FUK     | 2023 | 2044 | 11.9612455059  |
| NM_017491    | WDR1    | 1057 | 1092 | 5.44616013602  |
| NM_002140    | HNRNPK  | 1255 | 1302 | 0.704665300181 |
| NM_005002    | NDUFA9  | 356  | 436  | 8.32370212702  |
| NM_024085    | ATG9A   | 1372 | 1408 | 8.63352903827  |
| NM_024085    | ATG9A   | 2773 | 2837 | 8.54956357921  |
| NM_024089    | KDELC1  | 916  | 950  | 5.55251581908  |
| NM_024089    | KDELC1  | 1181 | 1228 | 8.22144377887  |
| NM_024089    | KDELC1  | 1134 | 1164 | 7.95456552318  |
| NM_024089    | KDELC1  | 769  | 807  | 5.55251581908  |
| NM_024089    | KDELC1  | 1049 | 1108 | 8.44400995052  |
| NM_001012664 | SLC3A2  | 1387 | 1472 | 8.36127062857  |
| NM_001012664 | SLC3A2  | 1055 | 1144 | 8.58366304991  |
| NM_001012664 | SLC3A2  | 1755 | 1838 | 8.09823622274  |
| NM_001012664 | SLC3A2  | 1684 | 1739 | 8.47674784599  |
| NM_001012664 | SLC3A2  | 875  | 942  | 8.77630812785  |
| NM_001012664 | SLC3A2  | 1181 | 1283 | 8.58366304991  |
| NM_001012664 | SLC3A2  | 1865 | 1913 | 6.3572530284   |
| NM_001012664 | SLC3A2  | 137  | 223  | 7.58365631886  |
| NM_001012664 | SLC3A2  | 976  | 1050 | 7.36127062857  |
| NM_001012664 | SLC3A2  | 779  | 851  | 6.36127062857  |
| NM_001012664 | SLC3A2  | 1474 | 1673 | 9.36127062857  |
| NM_024552    | CERS4   | 1139 | 1169 | 6.27171997408  |
| NM_024551    | ADIPOR2 | 846  | 897  | 8.20155964093  |

|              |           |      |      |                 |               |
|--------------|-----------|------|------|-----------------|---------------|
| NM_024551    | ADIPOR2   | 47   | 77   | 7.87963178196   |               |
| NM_024551    | ADIPOR2   | 930  | 972  | 9.04938303308   |               |
| NM_024551    | ADIPOR2   | 3277 | 3297 | 5.87561418179   |               |
| NM_005499    | UBA2      | 859  | 890  | 2.52985702511   |               |
| NM_005493    | RANBP9    | 345  | 372  | 6.45969277302   |               |
| NM_147187    | TNFRSF10B |      | 946  | 990             | 3.22349664053 |
| NM_147187    | TNFRSF10B |      | 853  | 900             | 5.54926858527 |
| NM_147187    | TNFRSF10B |      | 540  | 582             | 4.22750750965 |
| NM_147187    | TNFRSF10B |      | 1195 | 1265            | 5.22751400479 |
| NM_005497    | GJC1      | 773  | 840  | 11.2297113949   |               |
| NM_018070    | SSBP3     | 7    | 40   | 4.84979402472   |               |
| NM_080866    | SLC22A9   | 720  | 753  | 7.5221403306    |               |
| NM_080866    | SLC22A9   | 650  | 699  | 7.52230734986   |               |
| NM_001145301 | RARA      | 1400 | 1430 | 6.04162684239   |               |
| NM_018447    | TMEM111   | 450  | 516  | 8.28609442368   |               |
| NM_001145306 | CDK6      | 256  | 288  | 10.2883018314   |               |
| NM_014300    | SEC11A    | 745  | 809  | 4.70713804089   |               |
| NM_014300    | SEC11A    | 827  | 873  | 5.22171121372   |               |
| NM_014300    | SEC11A    | 400  | 451  | 4.22171120617   |               |
| NM_001204368 | MGST2     | 442  | 474  | 4.38215887745   |               |
| NM_001204368 | MGST2     | 413  | 438  | 3.3783150276    |               |
| NM_001204368 | MGST2     | 496  | 600  | 4.11929822194   |               |
| NM_005671    | UBXN8     | 676  | 703  | 7.35654037822   |               |
| NM_005671    | UBXN8     | 593  | 634  | 8.67445760398   |               |
| NM_016048    | ISOC1     | 4    | 24   | 6.64655160742   |               |
| NM_016040    | TMED5     | 702  | 769  | 4.41365849478   |               |
| NM_016040    | TMED5     | 829  | 915  | 4.41365849478   |               |
| NM_016041    | DERL2     | 394  | 427  | 5.99397545122   |               |
| NM_001009    | RPS5      | 453  | 511  | 3.70985200059   |               |
| NM_001009    | RPS5      | 615  | 683  | 4.08836362385   |               |
| NM_001009    | RPS5      | 318  | 355  | 2.38791717465   |               |
| NM_004079    | CTSS      | 478  | 503  | 11.7526232129   |               |
| NM_004079    | CTSS      | 942  | 987  | 12.2477823214   |               |
| NM_004079    | CTSS      | 1093 | 1152 | 12.8367624223   |               |
| NM_004079    | CTSS      | 747  | 780  | 11.8367556913   |               |
| NM_004079    | CTSS      | 593  | 706  | 14.6441173444   |               |
| NM_001004    | RPLP2     | 165  | 223  | 2.74995623101   |               |
| NM_001004    | RPLP2     | 283  | 354  | -0.337506610244 |               |
| NM_001004    | RPLP2     | 229  | 280  | 0.662486658709  |               |
| NM_001005    | RPS3      | 285  | 335  | -1.05685487115  |               |
| NM_001005    | RPS3      | 645  | 714  | -1.05283750689  |               |
| NM_001005    | RPS3      | 130  | 207  | -1.05685487115  |               |
| NM_001554    | CYR61     | 1007 | 1063 | 10.4864402984   |               |
| NM_001554    | CYR61     | 1174 | 1224 | 8.78599384919   |               |
| NM_001554    | CYR61     | 582  | 625  | 9.10775492481   |               |
| NM_001554    | CYR61     | 176  | 220  | 8.36694548079   |               |
| NM_001554    | CYR61     | 637  | 793  | 10.370963081    |               |
| NM_001007    | RPS4X     | 567  | 626  | 0.0870118457188 |               |
| NM_001007    | RPS4X     | 306  | 368  | 0.0870118457188 |               |
| NM_001003    | RPLP1     | 112  | 169  | 2.54529960079   |               |

|              |         |      |      |                |
|--------------|---------|------|------|----------------|
| NM_000201    | ICAM1   | 340  | 420  | 7.41173694304  |
| NM_000201    | ICAM1   | 1141 | 1224 | 7.79024856629  |
| NM_000201    | ICAM1   | 865  | 957  | 9.08980884815  |
| NM_000201    | ICAM1   | 530  | 571  | 4.0898021171   |
| NM_000201    | ICAM1   | 1629 | 1776 | 9.25973384959  |
| NM_000201    | ICAM1   | 1227 | 1319 | 7.79024856629  |
| NM_000201    | ICAM1   | 999  | 1099 | 7.41173694304  |
| NM_000201    | ICAM1   | 628  | 709  | 7.08980884815  |
| NM_000201    | ICAM1   | 1406 | 1546 | 8.54924046679  |
| NM_000201    | ICAM1   | 754  | 814  | 6.08980884814  |
| NM_000972    | RPL7A   | 353  | 414  | 0.703141402166 |
| NM_000970    | RPL6    | 552  | 591  | 2.33313078354  |
| NM_000970    | RPL6    | 861  | 895  | 1.33330452631  |
| NM_000204    | CFI     | 1813 | 1859 | 3.41590256379  |
| NM_000204    | CFI     | 1383 | 1422 | 3.73765690836  |
| NM_000204    | CFI     | 576  | 621  | 3.00069131419  |
| NM_000204    | CFI     | 751  | 801  | 4.87533418243  |
| NM_000204    | CFI     | 1528 | 1577 | 4.00086505696  |
| NM_000204    | CFI     | 918  | 976  | 4.58582756523  |
| NM_000204    | CFI     | 1605 | 1634 | 3.41572881347  |
| NM_000204    | CFI     | 656  | 684  | 4.00086506429  |
| NM_000204    | CFI     | 708  | 751  | 3.73782392762  |
| NM_000204    | CFI     | 1268 | 1305 | 2.33176335441  |
| NM_000204    | CFI     | 1310 | 1375 | 5.22325748585  |
| NM_000204    | CFI     | 1026 | 1161 | 6.00086506451  |
| NM_000204    | CFI     | 1210 | 1261 | 1.41572881347  |
| NM_000208    | INSR    | 3129 | 3186 | 7.23309920265  |
| NM_000208    | INSR    | 1727 | 1762 | 9.23310592615  |
| NM_000208    | INSR    | 1621 | 1669 | 8.23310593369  |
| NM_000208    | INSR    | 2714 | 2816 | 9.55503402859  |
| NM_000208    | INSR    | 923  | 971  | 7.8180681985   |
| NM_000208    | INSR    | 555  | 605  | 6.22908833353  |
| NM_000208    | INSR    | 4065 | 4108 | 6.22908833353  |
| NM_000755    | CRAT    | 534  | 556  | 7.35489350502  |
| NM_000978    | RPL23   | 441  | 503  | -1.19557937006 |
| NM_199329    | SLC43A3 | 790  | 855  | 12.9490292263  |
| NM_199329    | SLC43A3 | 1595 | 1667 | 13.2120638681  |
| NM_199329    | SLC43A3 | 890  | 966  | 13.9490294622  |
| NM_199329    | SLC43A3 | 1303 | 1387 | 13.9490294622  |
| NM_003957    | BRSK2   | 101  | 133  | 11.7487799239  |
| NM_003953    | MPZL1   | 919  | 960  | 8.56393534254  |
| NM_003953    | MPZL1   | 716  | 779  | 8.56795293516  |
| NM_020649    | CBX8    | 1249 | 1269 | 8.73706576002  |
| NM_006500    | MCAM    | 1712 | 1762 | 9.70051496286  |
| NM_003403    | YY1     | 315  | 347  | 6.19483919852  |
| NM_006694    | JTB     | 1037 | 1094 | 6.08106170591  |
| NM_020445    | ACTR3B  | 939  | 981  | 8.63865832576  |
| NM_001017392 | SUGP2   | 2825 | 2851 | 6.29003086412  |
| NM_005801    | EIF1    | 452  | 489  | 0.336535320774 |
| NM_005807    | PRG4    | 3807 | 3828 | 12.4724750169  |

|           |          |      |      |                   |
|-----------|----------|------|------|-------------------|
| NM_002468 | MYD88    | 481  | 501  | 6.10121064562     |
| NM_031965 | GSG2     | 2669 | 2730 | 11.5196593989     |
| NM_031965 | GSG2     | 207  | 230  | 11.4355201896     |
| NM_022121 | PERP     | 459  | 499  | 7.14344512922     |
| NM_022121 | PERP     | 660  | 728  | 9.23090797048     |
| NM_022121 | PERP     | 504  | 561  | 6.72840739403     |
| NM_022121 | PERP     | 365  | 436  | 7.72840762973     |
| NM_022121 | PERP     | 104  | 156  | 6.13942752906     |
| NM_213560 | PKN1     | 2322 | 2368 | 6.57695103772     |
| NM_030758 | OSBP2    | 79   | 101  | 10.6804981774     |
| NM_173471 | SLC25A26 |      | 1497 | 1516 8.5606926339 |
| NM_173475 | DCUN1D3  | 2064 | 2085 | 8.98228242258     |
| NM_004444 | EPHB4    | 1054 | 1132 | 8.19881681155     |
| NM_004444 | EPHB4    | 2952 | 3031 | 8.78377931227     |
| NM_004444 | EPHB4    | 592  | 626  | 7.19881657563     |
| NM_004444 | EPHB4    | 1868 | 1896 | 5.60983671066     |
| NM_004444 | EPHB4    | 2066 | 2199 | 8.61385431083     |
| NM_012242 | DKK1     | 1360 | 1409 | 8.42253022289     |
| NM_012242 | DKK1     | 684  | 918  | 13.3051732725     |
| NM_012242 | DKK1     | 1037 | 1076 | 7.75342851301     |
| NM_012242 | DKK1     | 919  | 997  | 8.15949581728     |
| NM_012242 | DKK1     | 358  | 668  | 12.8033520071     |
| NM_012242 | DKK1     | 1087 | 1201 | 9.64492264445     |
| NM_012242 | DKK1     | 2    | 335  | 12.2638324771     |
| NM_012242 | DKK1     | 1206 | 1309 | 9.42253022311     |
| NM_022780 | RMND5A   | 438  | 518  | 3.57623290745     |
| NM_022786 | ARV1     | 152  | 212  | 8.59731577573     |
| NM_201430 | RTN3     | 427  | 477  | 7.11593945129     |
| NM_201430 | RTN3     | 291  | 377  | 6.85290504546     |
| NM_201430 | RTN3     | 530  | 567  | 4.53097694302     |
| NM_201430 | RTN3     | 1564 | 1621 | 5.03180024191     |
| NM_201430 | RTN3     | 152  | 287  | 6.70090195179     |
| NM_201430 | RTN3     | 589  | 790  | 9.3889579457      |
| NM_004995 | MMP14    | 1513 | 1553 | 10.8720915977     |
| NM_004995 | MMP14    | 1226 | 1277 | 10.8720915902     |
| NM_004995 | MMP14    | 921  | 997  | 10.6090571919     |
| NM_004995 | MMP14    | 1814 | 1907 | 9.28712236595     |
| NM_001610 | ACP2     | 1251 | 1301 | 9.50545311657     |
| NM_001610 | ACP2     | 424  | 456  | 6.92032359658     |
| NM_001614 | ACTG1    | 444  | 507  | 1.70822374865     |
| NM_001614 | ACTG1    | 192  | 224  | 0.0391220385446   |
| NM_001614 | ACTG1    | 1255 | 1303 | -0.87673898799    |
| NM_001614 | ACTG1    | 70   | 118  | 2.12326124793     |
| NM_001614 | ACTG1    | 656  | 725  | 2.12326124793     |
| NM_001614 | ACTG1    | 775  | 819  | 1.12326124793     |
| NM_001614 | ACTG1    | 552  | 612  | 0.7082237411      |
| NM_001614 | ACTG1    | 970  | 1044 | 3.12326124793     |
| NM_001614 | ACTG1    | 135  | 184  | 0.708223512731    |
| NM_001614 | ACTG1    | 316  | 411  | 2.29318624937     |
| NM_001614 | ACTG1    | 225  | 310  | 2.44518934282     |

|              |           |      |      |                    |
|--------------|-----------|------|------|--------------------|
| NM_004225    | MFHAS1    | 758  | 796  | 7.36513396943      |
| NM_004225    | MFHAS1    | 69   | 91   | 8.36513396943      |
| NM_020784    | TXNDC16   | 1043 | 1082 | 8.65388109276      |
| NM_001206840 | TGOLN2    | 1496 | 1540 | 7.19357790527      |
| NM_001206840 | TGOLN2    | 861  | 912  | 6.67900496835      |
| NM_001206840 | TGOLN2    | 1285 | 1341 | 6.67900496835      |
| NM_001206840 | TGOLN2    | 915  | 975  | 4.87147629598      |
| NM_001206840 | TGOLN2    | 4318 | 4354 | 5.78751083691      |
| NM_001206840 | TGOLN2    | 1445 | 1480 | 3.86763244612      |
| NM_001206840 | TGOLN2    | 1365 | 1404 | 3.87165003875      |
| NM_001206840 | TGOLN2    | 1827 | 1873 | 4.86763244612      |
| NM_020781    | ZNF398    | 180  | 199  | 10.2412427709      |
| NM_032802    | SPPL2A    | 731  | 790  | 6.10244382156      |
| NM_032802    | SPPL2A    | 854  | 900  | 7.1022768023       |
| NM_032802    | SPPL2A    | 1012 | 1095 | 7.97691967053      |
| NM_032802    | SPPL2A    | 1421 | 1487 | 6.83941591087      |
| NM_016561    | BFAR      | 1103 | 1196 | 4.38372179829      |
| NM_207351    | PRRT3     | 2142 | 2163 | 13.5405148376      |
| NM_002128    | HMGB1     | 460  | 500  | 1.01899283128      |
| NM_001010911 | C10orf114 |      | 1706 | 1727 9.61015049523 |
| NM_001024736 | CD276     | 1712 | 1808 | 6.89007955954      |
| NM_006597    | HSPA8     | 1168 | 1258 | 4.42936323715      |
| NM_006597    | HSPA8     | 1018 | 1086 | 2.65175565849      |
| NM_006597    | HSPA8     | 1328 | 1383 | 2.16632210026      |
| NM_006597    | HSPA8     | 1952 | 1998 | 1.84440073642      |
| NM_006597    | HSPA8     | 2057 | 2091 | -0.155599499491    |
| NM_006597    | HSPA8     | 1474 | 1530 | 2.4293565061       |
| NM_006597    | HSPA8     | 751  | 793  | 1.84440050051      |
| NM_006597    | HSPA8     | 472  | 537  | 1.42534563698      |
| NM_006597    | HSPA8     | 675  | 705  | 0.760261527044     |
| NM_006597    | HSPA8     | 357  | 432  | 3.30383235506      |
| NM_006597    | HSPA8     | 1442 | 1473 | 2.08218962193      |
| NM_006597    | HSPA8     | 909  | 936  | 0.840383136255     |
| NM_006597    | HSPA8     | 1717 | 1862 | 3.54484045457      |
| NM_006597    | HSPA8     | 2011 | 2045 | 0.760261527044     |
| NM_006597    | HSPA8     | 273  | 330  | 1.84422698611      |
| NM_006597    | HSPA8     | 822  | 873  | 2.42918948683      |
| NM_006598    | SLC12A7   | 717  | 759  | 7.99383159899      |
| NM_006598    | SLC12A7   | 3512 | 3597 | 8.34099848316      |
| NM_006598    | SLC12A7   | 486  | 530  | 8.25686600483      |
| NM_006598    | SLC12A7   | 2229 | 2277 | 8.56339763532      |
| NM_006598    | SLC12A7   | 2385 | 2425 | 7.25686600483      |
| NM_006598    | SLC12A7   | 2722 | 2764 | 7.75202511331      |
| NM_006598    | SLC12A7   | 2475 | 2519 | 6.6719035041       |
| NM_006598    | SLC12A7   | 1759 | 1874 | 9.21547433213      |
| NM_005476    | GNE       | 1135 | 1181 | 7.49128164644      |
| NM_018469    | TEX2      | 2787 | 2832 | 8.85466047722      |
| NM_198830    | ACLY      | 2134 | 2173 | 4.64585060861      |
| NM_001190946 | FAM193B   | 6    | 63   | 9.10294226668      |
| NM_005614    | RHEB      | 116  | 135  | 2.50998525938      |

|           |         |      |      |               |
|-----------|---------|------|------|---------------|
| NM_023008 | KRI1    | 1283 | 1346 | 6.88589618451 |
| NM_002372 | MAN2A1  | 1952 | 1979 | 6.21199172703 |
| NM_002372 | MAN2A1  | 1685 | 1723 | 6.8007980776  |
| NM_002372 | MAN2A1  | 2032 | 2076 | 4.21600909128 |
| NM_002372 | MAN2A1  | 1840 | 1875 | 4.21199172703 |
| NM_002372 | MAN2A1  | 1381 | 1418 | 6.21199172703 |
| NM_002372 | MAN2A1  | 2848 | 2911 | 6.21583557688 |
| NM_002372 | MAN2A1  | 2114 | 2184 | 7.21600931965 |
| NM_002372 | MAN2A1  | 3151 | 3213 | 5.13187011782 |
| NM_002372 | MAN2A1  | 425  | 452  | 4.13187011782 |
| NM_032020 | FUCA2   | 1161 | 1226 | 4.95853791538 |
| NM_032020 | FUCA2   | 497  | 528  | 7.04449745776 |
| NM_032020 | FUCA2   | 1273 | 1330 | 7.12863666714 |
| NM_032020 | FUCA2   | 1009 | 1049 | 3.95870493465 |
| NM_032020 | FUCA2   | 869  | 961  | 8.04617450695 |
| NM_032020 | FUCA2   | 658  | 809  | 8.35102908848 |
| NM_032020 | FUCA2   | 1510 | 1560 | 3.95870493465 |
| NM_152556 | C7orf60 | 3153 | 3173 | 8.05612300592 |
| NM_152558 | IQCE    | 2018 | 2047 | 11.6682116444 |
| NM_016029 | DHRS7   | 285  | 380  | 9.13934415401 |
| NM_016029 | DHRS7   | 1114 | 1184 | 7.81741605912 |
| NM_016026 | RDH11   | 277  | 336  | 7.66161893332 |
| NM_016026 | RDH11   | 749  | 794  | 6.66161893332 |
| NM_016026 | RDH11   | 364  | 400  | 6.0766564326  |
| NM_016026 | RDH11   | 468  | 511  | 6.39456692731 |
| NM_016026 | RDH11   | 937  | 1038 | 6.88401135466 |
| NM_016026 | RDH11   | 820  | 846  | 4.99251722322 |
| NM_015051 | ERP44   | 925  | 946  | 4.82204512508 |
| NM_015051 | ERP44   | 961  | 1003 | 5.49114682764 |
| NM_015051 | ERP44   | 868  | 902  | 5.4070076258  |
| NM_015051 | ERP44   | 641  | 684  | 6.22811242935 |
| NM_015051 | ERP44   | 1041 | 1070 | 5.4070076258  |
| NM_015051 | ERP44   | 1100 | 1135 | 4.82204512508 |
| NM_015051 | ERP44   | 713  | 794  | 7.99364717571 |
| NM_015057 | MYCBP2  | 238  | 270  | 8.58512472782 |
| NM_033198 | PIGS    | 930  | 997  | 8.89274799105 |
| NM_033198 | PIGS    | 1735 | 1786 | 7.30778549032 |
| NM_033198 | PIGS    | 777  | 838  | 6.30778548278 |
| NM_138501 | TECR    | 1036 | 1070 | 6.93866198788 |
| NM_138501 | TECR    | 720  | 750  | 6.5236244886  |
| NM_138501 | TECR    | 302  | 356  | 7.1764511093  |
| NM_138501 | TECR    | 34   | 77   | 5.85452301441 |
| NM_138501 | TECR    | 130  | 205  | 8.10858722524 |
| NM_138501 | TECR    | 689  | 717  | 6.51960712435 |
| NM_138501 | TECR    | 798  | 857  | 6.52362472451 |
| NM_004055 | CAPN5   | 2900 | 2919 | 11.1175006176 |
| NM_000224 | KRT18   | 694  | 746  | 5.17689122549 |
| NM_000224 | KRT18   | 137  | 172  | 4.52480779785 |
| NM_000224 | KRT18   | 564  | 610  | 4.52079692873 |
| NM_000224 | KRT18   | 344  | 454  | 3.71728585653 |

|              |         |      |      |                |
|--------------|---------|------|------|----------------|
| NM_000224    | KRT18   | 881  | 934  | 2.71344200668  |
| NM_017770    | ELOVL2  | 623  | 662  | 8.46798129921  |
| NM_001142450 | SPNS1   | 1103 | 1190 | 8.57478260032  |
| NM_001142450 | SPNS1   | 1582 | 1653 | 8.57880020049  |
| NM_001142450 | SPNS1   | 1215 | 1285 | 6.9898200996   |
| NM_001142450 | SPNS1   | 722  | 780  | 7.57879996458  |
| NM_001142450 | SPNS1   | 913  | 958  | 7.99383769977  |
| NM_001142450 | SPNS1   | 1285 | 1368 | 8.80118589078  |
| NM_001031835 | PHKB    | 3425 | 3450 | 4.00224705602  |
| NM_001114106 | SLC44A3 | 997  | 1035 | 8.73402144992  |
| NM_024927    | PLEKHH3 | 1738 | 1760 | 9.99200833844  |
| NM_024923    | NUP210  | 1234 | 1285 | 8.60409353498  |
| NM_024923    | NUP210  | 4641 | 4676 | 6.01511343408  |
| NM_024923    | NUP210  | 438  | 479  | 8.0191243032   |
| NM_024923    | NUP210  | 2141 | 2185 | 6.93499182487  |
| NM_024923    | NUP210  | 3854 | 3924 | 8.01511343408  |
| NM_024923    | NUP210  | 794  | 863  | 8.34088537883  |
| NM_024923    | NUP210  | 213  | 252  | 7.01511343408  |
| NM_024923    | NUP210  | 2960 | 3045 | 9.1890560357   |
| NM_017510    | TMED9   | 352  | 432  | 5.80764245381  |
| NM_017510    | TMED9   | 475  | 537  | 6.15556575723  |
| NM_017510    | TMED9   | 124  | 222  | 6.74052825795  |
| NM_017510    | TMED9   | 1135 | 1194 | 4.344193235    |
| NM_017510    | TMED9   | 603  | 693  | 6.34821083517  |
| NM_017510    | TMED9   | 991  | 1027 | 4.26407162579  |
| NM_017510    | TMED9   | 0    | 114  | 6.25510143078  |
| NM_017510    | TMED9   | 255  | 338  | 3.93317333589  |
| NM_173647    | RNF149  | 31   | 109  | 7.71711345727  |
| NM_017519    | ARID1B  | 1367 | 1394 | 7.17064748639  |
| NM_017518    | HAUS7   | 97   | 117  | 10.7052198578  |
| NM_001017367 | C4BPB   | 238  | 275  | 4.65701401703  |
| NM_001017367 | C4BPB   | 523  | 562  | 5.66103138128  |
| NM_153705    | KDELC2  | 1162 | 1205 | 6.66955021984  |
| NM_153705    | KDELC2  | 842  | 870  | 7.08441396881  |
| NM_153702    | ELMOD2  | 445  | 501  | 6.91091594378  |
| NM_153702    | ELMOD2  | 171  | 229  | 5.91493330803  |
| NM_006360    | EIF3M   | 58   | 94   | 2.29757968366  |
| NM_001622    | AHSG    | 1409 | 1511 | 2.91501091389  |
| NM_001622    | AHSG    | 760  | 828  | 1.53649929063  |
| NM_001622    | AHSG    | 1512 | 1555 | 0.214564464691 |
| NM_001622    | AHSG    | 1172 | 1225 | 0.384496197187 |
| NM_001622    | AHSG    | 1111 | 1165 | 1.12146179135  |
| NM_001622    | AHSG    | 893  | 965  | 2.34385421269  |
| NM_001622    | AHSG    | 247  | 564  | 4.48135773644  |
| NM_001622    | AHSG    | 79   | 234  | 3.60688861852  |
| NM_001622    | AHSG    | 587  | 748  | 3.0219261178   |
| NM_001622    | AHSG    | 1304 | 1382 | 0.674002814382 |
| NM_001622    | AHSG    | 965  | 1090 | 2.64083595045  |
| NM_020755    | SERINC1 | 1015 | 1052 | 5.35369981331  |
| NM_020755    | SERINC1 | 769  | 824  | 5.93866903753  |



|              |          |      |      |                    |
|--------------|----------|------|------|--------------------|
| NM_020755    | SERINC1  | 1350 | 1401 | 5.76874404364      |
| NM_020755    | SERINC1  | 480  | 548  | 5.57609896569      |
| NM_020755    | SERINC1  | 600  | 730  | 7.93866904508      |
| NM_020755    | SERINC1  | 21   | 107  | 5.57609896569      |
| NM_020755    | SERINC1  | 1110 | 1262 | 7.67563463925      |
| NM_001166392 | TPBG     | 1439 | 1479 | 12.079996478       |
| NM_001627    | ALCAM    | 2369 | 2401 | 5.91441378186      |
| NM_001627    | ALCAM    | 1777 | 1823 | 5.91825763171      |
| NM_001627    | ALCAM    | 1254 | 1317 | 7.79290049995      |
| NM_001627    | ALCAM    | 1004 | 1068 | 8.72578630409      |
| NM_001627    | ALCAM    | 1703 | 1736 | 4.33346215025      |
| NM_001627    | ALCAM    | 720  | 756  | 6.91441378186      |
| NM_001627    | ALCAM    | 518  | 552  | 6.91843114611      |
| NM_001627    | ALCAM    | 1949 | 1989 | 6.32945128113      |
| NM_001627    | ALCAM    | 893  | 991  | 8.14082380337      |
| NM_001627    | ALCAM    | 1848 | 1910 | 5.91843138203      |
| NM_001627    | ALCAM    | 818  | 855  | 6.33346887376      |
| NM_001627    | ALCAM    | 1546 | 1634 | 8.24035947692      |
| NM_001627    | ALCAM    | 2280 | 2365 | 6.6553969762       |
| NM_005866    | SIGMAR1  | 367  | 413  | 8.14359746921      |
| NM_005866    | SIGMAR1  | 290  | 336  | 8.90179098353      |
| NM_015202    | KIAA0556 |      | 4580 | 4599 8.83818644396 |
| NM_018320    | RNF121   | 1226 | 1263 | 6.78758552374      |
| NM_002489    | NDUFA4   | 168  | 249  | 5.67578360815      |
| NM_004819    | SYMPK    | 156  | 182  | 5.64154562556      |
| NM_031903    | MRPL32   | 505  | 528  | 3.08034671332      |
| NM_033505    | EPT1     | 738  | 771  | 8.38884433998      |
| NM_033505    | EPT1     | 1109 | 1173 | 6.15088170416      |
| NM_005134    | PPP4R1   | 3500 | 3519 | 5.78870908741      |
| NM_005134    | PPP4R1   | 7    | 37   | 5.87267454647      |
| NM_001909    | CTSD     | 1181 | 1229 | 4.02713874514      |
| NM_001909    | CTSD     | 945  | 1027 | 6.61210797691      |
| NM_001909    | CTSD     | 1654 | 1682 | 4.02713874514      |
| NM_001909    | CTSD     | 151  | 218  | 6.24953789753      |
| NM_001909    | CTSD     | 1983 | 2025 | 5.02714546864      |
| NM_001909    | CTSD     | 748  | 853  | 7.44218297547      |
| NM_001909    | CTSD     | 1234 | 1335 | 6.90161459411      |
| NM_001909    | CTSD     | 312  | 400  | 7.08603916525      |
| NM_001909    | CTSD     | 883  | 930  | 5.61210797691      |
| NM_001909    | CTSD     | 220  | 276  | 5.90161459411      |
| NM_001909    | CTSD     | 1032 | 1087 | 4.02714524027      |
| NM_001909    | CTSD     | 525  | 673  | 7.44218297547      |
| NM_001909    | CTSD     | 401  | 499  | 6.61210797691      |
| NM_001909    | CTSD     | 705  | 738  | 2.35804376609      |
| NM_001909    | CTSD     | 1134 | 1162 | 3.4381653753       |
| NM_001909    | CTSD     | 1557 | 1648 | 5.90161459411      |
| NM_001909    | CTSD     | 1477 | 1553 | 5.02714524027      |
| NM_001901    | CTGF     | 1277 | 1320 | 5.27968314696      |
| NM_001901    | CTGF     | 1037 | 1098 | 5.27968314718      |
| NM_001901    | CTGF     | 917  | 971  | 4.40521402927      |

|              |          |      |      |                   |
|--------------|----------|------|------|-------------------|
| NM_001901    | CTGF     | 581  | 667  | 3.82025152854     |
| NM_001901    | CTGF     | 432  | 493  | 4.14217962343     |
| NM_001901    | CTGF     | 725  | 783  | 3.40521379335     |
| NM_001901    | CTGF     | 38   | 78   | 3.32107481988     |
| NM_001901    | CTGF     | 1110 | 1192 | 5.72714212415     |
| NM_001198869 | CAPN1    | 1067 | 1087 | 6.85834555749     |
| NM_001135917 | DOLPP1   | 435  | 477  | 9.20633837991     |
| NM_000506    | F2       | 937  | 984  | 3.47075837522     |
| NM_000506    | F2       | 832  | 874  | 3.79669733923     |
| NM_000506    | F2       | 1534 | 1590 | 4.64470097684     |
| NM_000506    | F2       | 322  | 382  | 4.28213089723     |
| NM_000506    | F2       | 594  | 664  | 3.05572087594     |
| NM_000506    | F2       | 1015 | 1182 | 5.05973847612     |
| NM_182776    | MCM7     | 683  | 734  | 5.45318655444     |
| NM_182776    | MCM7     | 1506 | 1571 | 6.85925362279     |
| NM_030978    | ARPC5L   | 147  | 192  | 5.94342676914     |
| NM_001636    | SLC25A6  | 81   | 130  | 5.11988074057     |
| NM_001633    | AMBP     | 211  | 244  | -0.661512403623   |
| NM_001633    | AMBP     | 965  | 988  | 1.33865461564     |
| NM_001633    | AMBP     | 1006 | 1149 | 5.2455519423      |
| NM_001633    | AMBP     | 680  | 940  | 5.96801796677     |
| NM_001633    | AMBP     | 344  | 578  | 5.73097876947     |
| NM_001633    | AMBP     | 1157 | 1314 | 3.86222330275     |
| NM_014802    | KIAA0528 |      | 1909 | 1929 7.6916542339 |
| NM_032824    | TMEM87B  | 1057 | 1096 | 8.01355685553     |
| NM_032824    | TMEM87B  | 1191 | 1277 | 8.7505291732      |
| NM_001037335 | PRIC285  | 1620 | 1639 | 10.2805526867     |
| NM_007195    | POLI     | 1613 | 1645 | 6.66650047015     |
| NM_007190    | SEC23IP  | 487  | 505  | 7.10328513174     |
| NM_003851    | CREG1    | 664  | 693  | 8.66376086266     |
| NM_003851    | CREG1    | 261  | 321  | 10.6637608627     |
| NM_003851    | CREG1    | 522  | 548  | 11.8338528834     |
| NM_203341    | SEP15    | 468  | 504  | 5.34981580355     |
| NM_203341    | SEP15    | 573  | 623  | 5.3457984393      |
| NM_182828    | GDF7     | 694  | 729  | 9.91651906379     |
| NM_002106    | H2AFZ    | 271  | 343  | 3.99830557486     |
| NM_024047    | NUDT9    | 760  | 811  | 8.28866454927     |
| NM_024047    | NUDT9    | 922  | 959  | 7.80323772943     |
| NM_001084393 | DDTL     | 113  | 166  | 7.11495069015     |
| NM_001084392 | DDT      | 113  | 166  | 4.66927121326     |
| NM_001205254 | OCLN     | 866  | 929  | 6.52944542702     |
| NM_001205254 | OCLN     | 1628 | 1705 | 6.52944542703     |
| NM_001205254 | OCLN     | 1110 | 1166 | 5.20734358182     |
| NM_001205254 | OCLN     | 1488 | 1554 | 7.01469850388     |
| NM_001205254 | OCLN     | 1560 | 1611 | 6.20751733214     |
| NM_002337    | LRPAP1   | 893  | 926  | 3.87688370272     |
| NM_002337    | LRPAP1   | 438  | 490  | 5.20282939778     |
| NM_002337    | LRPAP1   | 823  | 891  | 5.7877918985      |
| NM_002337    | LRPAP1   | 1197 | 1255 | 3.87688370272     |
| NM_002337    | LRPAP1   | 1006 | 1044 | 5.04680870416     |

|           |         |      |      |               |
|-----------|---------|------|------|---------------|
| NM_002337 | LRPAP1  | 1306 | 1363 | 4.6882494939  |
| NM_002337 | LRPAP1  | 505  | 613  | 6.40446325895 |
| NM_002337 | LRPAP1  | 1099 | 1170 | 3.88090130289 |
| NM_002337 | LRPAP1  | 636  | 770  | 5.96836414414 |
| NM_002337 | LRPAP1  | 250  | 425  | 7.34033292153 |
| NM_002336 | LRP6    | 2672 | 2698 | 6.08028606422 |
| NM_177969 | PPM1B   | 230  | 253  | 6.32115775002 |
| NM_012401 | PLXNB2  | 3848 | 3904 | 8.28819591942 |
| NM_012401 | PLXNB2  | 2585 | 2630 | 6.80276909203 |
| NM_012401 | PLXNB2  | 4485 | 4530 | 6.06580349809 |
| NM_012401 | PLXNB2  | 5726 | 5795 | 6.47682339719 |
| NM_012401 | PLXNB2  | 11   | 132  | 6.48084099736 |
| NM_012401 | PLXNB2  | 3243 | 3283 | 7.2881959192  |
| NM_012401 | PLXNB2  | 3360 | 3403 | 6.39670178798 |
| NM_012401 | PLXNB2  | 633  | 690  | 6.80276909225 |
| NM_012401 | PLXNB2  | 1404 | 1455 | 6.06580349786 |
| NM_012401 | PLXNB2  | 4245 | 4308 | 7.28819591942 |
| NM_012401 | PLXNB2  | 3485 | 3567 | 8.87315842014 |
| NM_012401 | PLXNB2  | 5815 | 5855 | 5.9816642887  |
| NM_012401 | PLXNB2  | 2133 | 2175 | 7.940272616   |
| NM_012401 | PLXNB2  | 1218 | 1341 | 8.28819591942 |
| NM_012401 | PLXNB2  | 5406 | 5472 | 6.47682339719 |
| NM_012401 | PLXNB2  | 2834 | 2881 | 4.48083426631 |
| NM_012401 | PLXNB2  | 4658 | 4692 | 6.06579676703 |
| NM_012401 | PLXNB2  | 184  | 242  | 7.06579676703 |
| NM_012401 | PLXNB2  | 2220 | 2259 | 5.9816642887  |
| NM_012401 | PLXNB2  | 3717 | 3777 | 6.48084098982 |
| NM_012401 | PLXNB2  | 3283 | 3323 | 7.65076599126 |
| NM_012401 | PLXNB2  | 4940 | 4976 | 7.2880221691  |
| NM_012401 | PLXNB2  | 3428 | 3469 | 6.48083426631 |
| NM_012401 | PLXNB2  | 911  | 982  | 7.48084099736 |
| NM_012401 | PLXNB2  | 2450 | 2546 | 7.28819591942 |
| NM_012401 | PLXNB2  | 2659 | 2742 | 7.48084099736 |
| NM_012401 | PLXNB2  | 4148 | 4227 | 6.06580349054 |
| NM_012401 | PLXNB2  | 1901 | 1976 | 5.47682339719 |
| NM_012401 | PLXNB2  | 2331 | 2402 | 7.47682339719 |
| NM_012401 | PLXNB2  | 3911 | 4036 | 8.65076599881 |
| NM_012401 | PLXNB2  | 4384 | 4458 | 7.06580349786 |
| NM_003676 | DEGS1   | 369  | 393  | 7.95783369213 |
| NM_003676 | DEGS1   | 997  | 1042 | 10.2797685181 |
| NM_003676 | DEGS1   | 434  | 464  | 8.95784042296 |
| NM_003676 | DEGS1   | 621  | 685  | 10.9578401873 |
| NM_003676 | DEGS1   | 523  | 593  | 10.6582801413 |
| NM_003670 | BHLHE40 | 1464 | 1499 | 6.30968419558 |
| NM_018407 | LAPTM4B | 974  | 1009 | 6.29302422764 |
| NM_018407 | LAPTM4B | 940  | 964  | 4.20889174931 |
| NM_018407 | LAPTM4B | 738  | 812  | 8.1999215543  |
| NM_018407 | LAPTM4B | 498  | 632  | 8.10038588075 |
| NM_005631 | SMO     | 2520 | 2539 | 8.0429577428  |
| NM_032591 | SLC9A7  | 9362 | 9381 | 8.85666109759 |

|              |           |      |      |                    |
|--------------|-----------|------|------|--------------------|
| NM_032593    | HINT2     | 293  | 345  | 7.04915153755      |
| NM_152713    | STT3A     | 2319 | 2345 | 4.4569381591       |
| NM_152713    | STT3A     | 1429 | 1461 | 4.53705976831      |
| NM_152713    | STT3A     | 845  | 902  | 7.44796796409      |
| NM_152713    | STT3A     | 103  | 146  | 6.1260398692       |
| NM_152713    | STT3A     | 1382 | 1429 | 4.54090361816      |
| NM_152713    | STT3A     | 480  | 543  | 6.54107736848      |
| NM_152713    | STT3A     | 1511 | 1565 | 6.34843229054      |
| NM_152713    | STT3A     | 1994 | 2051 | 7.00050898712      |
| NM_152713    | STT3A     | 1941 | 1986 | 6.34843229054      |
| NM_152713    | STT3A     | 1857 | 1898 | 4.54107063743      |
| NM_152713    | STT3A     | 2215 | 2273 | 6.54107736848      |
| NM_152713    | STT3A     | 1148 | 1231 | 7.93339479126      |
| NM_152713    | STT3A     | 1285 | 1319 | 4.54107063743      |
| NM_152713    | STT3A     | 313  | 351  | 6.54090361816      |
| NM_152713    | STT3A     | 1596 | 1658 | 6.71100236992      |
| NM_152713    | STT3A     | 230  | 310  | 6.71100236992      |
| NM_152713    | STT3A     | 702  | 753  | 6.1260398692       |
| NM_152713    | STT3A     | 1237 | 1284 | 5.54107063743      |
| NM_152713    | STT3A     | 428  | 463  | 5.04190065982      |
| NM_152713    | STT3A     | 560  | 683  | 8.18493355826      |
| NM_152713    | STT3A     | 2365 | 2443 | 5.54107736848      |
| NM_152713    | STT3A     | 1049 | 1140 | 7.00050898712      |
| NM_152713    | STT3A     | 968  | 1022 | 6.54107736848      |
| NM_152713    | STT3A     | 2067 | 2199 | 7.62854020973      |
| NM_152718    | VWCE      | 1663 | 1725 | 7.57516388485      |
| NM_003844    | TNFRSF10A |      | 1172 | 1222 10.7214817394 |
| NM_138709    | DAB2IP    | 2878 | 2910 | 6.95737351986      |
| NM_212551    | LYSMD1    | 620  | 638  | 8.97277306849      |
| NM_001144072 | UBAC2     | 1037 | 1064 | 6.51478355087      |
| NM_015073    | SIPA1L3   | 1378 | 1412 | 9.70321664708      |
| NM_015077    | SARM1     | 1686 | 1704 | 13.1025991439      |
| NM_001018136 | NME1-NME2 |      | 566  | 648 2.58470882258  |
| NM_033315    | RASL10B   | 1039 | 1063 | 7.7077569081       |
| NM_021626    | SCPEP1    | 1361 | 1429 | 8.63887590462      |
| NM_021626    | SCPEP1    | 1103 | 1175 | 8.79087899807      |
| NM_017750    | RETSAT    | 378  | 425  | 8.99027097576      |
| NM_017750    | RETSAT    | 810  | 843  | 6.66432528825      |
| NM_017750    | RETSAT    | 1147 | 1190 | 7.66432528825      |
| NM_017750    | RETSAT    | 1416 | 1452 | 5.6681691381       |
| NM_017750    | RETSAT    | 1720 | 1746 | 6.58420367903      |
| NM_017750    | RETSAT    | 1595 | 1635 | 6.58420367903      |
| NM_178324    | SPTLC1    | 241  | 288  | 5.37084574726      |
| NM_178324    | SPTLC1    | 477  | 516  | 3.78605699685      |
| NM_001199322 | MUTED     | 33   | 51   | 3.59173636339      |
| NM_000245    | MET       | 3973 | 4012 | 7.14011439588      |
| NM_000245    | MET       | 3496 | 3525 | 8.64495528739      |
| NM_000245    | MET       | 3070 | 3110 | 8.14395824573      |
| NM_000245    | MET       | 1038 | 1087 | 9.46606009071      |
| NM_000245    | MET       | 952  | 1005 | 9.95148691788      |

|              |          |      |      |                    |
|--------------|----------|------|------|--------------------|
| NM_000245    | MET      | 3453 | 3492 | 9.46606009094      |
| NM_000245    | MET      | 1816 | 1842 | 9.05999278667      |
| NM_000715    | C4BPA    | 920  | 982  | 8.68519893605      |
| NM_000715    | C4BPA    | 1879 | 1942 | 9.03312223947      |
| NM_000715    | C4BPA    | 1140 | 1201 | 9.61808474019      |
| NM_000715    | C4BPA    | 468  | 502  | 6.22576730986      |
| NM_000715    | C4BPA    | 551  | 620  | 8.22576731741      |
| NM_000715    | C4BPA    | 1999 | 2028 | 6.81055606781      |
| NM_000715    | C4BPA    | 700  | 732  | 7.14162810803      |
| NM_000715    | C4BPA    | 1415 | 1451 | 7.22174971724      |
| NM_000715    | C4BPA    | 644  | 694  | 7.81072981813      |
| NM_000715    | C4BPA    | 383  | 433  | 8.03312223947      |
| NM_000715    | C4BPA    | 2126 | 2186 | 6.22174971724      |
| NM_000715    | C4BPA    | 1260 | 1306 | 7.5476954123       |
| NM_000715    | C4BPA    | 828  | 857  | 6.22576058636      |
| NM_000715    | C4BPA    | 1802 | 1842 | 6.81072958221      |
| NM_000715    | C4BPA    | 1211 | 1260 | 9.03312223947      |
| NM_000715    | C4BPA    | 1725 | 1785 | 6.2257673174       |
| NM_000715    | C4BPA    | 1559 | 1716 | 9.68519893605      |
| NM_000715    | C4BPA    | 254  | 354  | 8.39569231885      |
| NM_145201    | NAPRT1   | 539  | 557  | 10.8673194795      |
| NM_139056    | ADAMTS16 |      | 1003 | 1028 13.2746363292 |
| NM_006386    | DDX17    | 1360 | 1422 | 6.15554010098      |
| NM_006389    | HYOU1    | 1336 | 1390 | 6.92430915599      |
| NM_006389    | HYOU1    | 2337 | 2426 | 7.30282077924      |
| NM_006389    | HYOU1    | 1732 | 1786 | 7.06181267952      |
| NM_006389    | HYOU1    | 4058 | 4113 | 3.51824185172      |
| NM_006389    | HYOU1    | 3191 | 3249 | 7.30282077924      |
| NM_006389    | HYOU1    | 273  | 308  | 6.32559677377      |
| NM_006389    | HYOU1    | 1212 | 1322 | 8.6023810611       |
| NM_006389    | HYOU1    | 3102 | 3146 | 5.60238106088      |
| NM_006389    | HYOU1    | 2070 | 2130 | 5.60237433005      |
| NM_006389    | HYOU1    | 2814 | 2860 | 5.60220731078      |
| NM_006389    | HYOU1    | 1041 | 1088 | 5.1871698115       |
| NM_006389    | HYOU1    | 378  | 467  | 5.92430915577      |
| NM_024907    | FBX017   | 805  | 826  | 7.46409365725      |
| NM_002712    | PPP1R7   | 2049 | 2070 | 4.58548226196      |
| NM_024678    | NARS2    | 2173 | 2191 | 6.62476886654      |
| NM_005845    | ABCC4    | 1671 | 1716 | 11.170367954       |
| NM_005845    | ABCC4    | 2597 | 2636 | 8.84843985908      |
| NM_005845    | ABCC4    | 1163 | 1215 | 10.8445960092      |
| NM_005845    | ABCC4    | 2872 | 2904 | 10.3494369007      |
| NM_001007027 | ALG8     | 495  | 550  | 9.89954958568      |
| NM_001007027 | ALG8     | 401  | 445  | 8.57744774803      |
| NM_001007027 | ALG8     | 772  | 810  | 9.16258376315      |
| NM_001007027 | ALG8     | 897  | 953  | 10.1624102487      |
| NM_018201    | TBC1D13  | 64   | 92   | 8.77706070694      |
| NM_005159    | ACTC1    | 477  | 521  | 10.3396436784      |
| NM_001923    | DDB1     | 1893 | 1956 | 5.48146988134      |
| NM_001923    | DDB1     | 1096 | 1173 | 6.21442460639      |

|              |         |      |      |               |
|--------------|---------|------|------|---------------|
| NM_012287    | ACAP2   | 1147 | 1178 | 7.9457599275  |
| NM_004157    | PRKAR2A | 437  | 457  | 4.86969820232 |
| NM_001436    | FBL     | 231  | 275  | 5.68165815975 |
| NM_001382    | DPAGT1  | 1157 | 1196 | 9.40173706462 |
| NM_001382    | DPAGT1  | 1119 | 1147 | 8.8167745639  |
| NM_001382    | DPAGT1  | 893  | 965  | 11.0708385388 |
| NM_001382    | DPAGT1  | 734  | 769  | 7.90074002296 |
| NM_000527    | LDLR    | 2394 | 2432 | 5.31333516514 |
| NM_000527    | LDLR    | 1075 | 1108 | 5.89830416099 |
| NM_000527    | LDLR    | 2467 | 2530 | 7.12069681824 |
| NM_000527    | LDLR    | 545  | 606  | 6.89830439691 |
| NM_000527    | LDLR    | 158  | 200  | 5.81416518753 |
| NM_000527    | LDLR    | 440  | 490  | 5.89830416099 |
| NM_000527    | LDLR    | 954  | 1008 | 6.31333516514 |
| NM_000527    | LDLR    | 1456 | 1500 | 4.31333516514 |
| NM_000527    | LDLR    | 2207 | 2242 | 5.22920268681 |
| NM_000527    | LDLR    | 1259 | 1344 | 6.30932429602 |
| NM_000527    | LDLR    | 1511 | 1558 | 5.89428679674 |
| NM_000527    | LDLR    | 836  | 952  | 8.40080473744 |
| NM_000527    | LDLR    | 2750 | 2799 | 4.30932429602 |
| NM_000527    | LDLR    | 1607 | 1735 | 8.77277351483 |
| NM_000527    | LDLR    | 1751 | 1853 | 8.31334189619 |
| NM_000520    | HEXA    | 1549 | 1601 | 7.9606598777  |
| NM_000520    | HEXA    | 957  | 986  | 7.73826072531 |
| NM_000520    | HEXA    | 791  | 828  | 7.96048612739 |
| NM_000520    | HEXA    | 1275 | 1330 | 5.15330471973 |
| NM_000520    | HEXA    | 674  | 789  | 8.73826745637 |
| NM_000520    | HEXA    | 1668 | 1741 | 8.73826745637 |
| NM_000521    | HEXB    | 1616 | 1746 | 8.58642063835 |
| NM_000521    | HEXB    | 924  | 996  | 7.26431879315 |
| NM_000521    | HEXB    | 429  | 473  | 5.59539083336 |
| NM_000521    | HEXB    | 1560 | 1608 | 6.26448581241 |
| NM_000521    | HEXB    | 1430 | 1546 | 8.58642063835 |
| NM_015480    | PVRL3   | 15   | 47   | 6.88365963986 |
| NM_000528    | MAN2B1  | 2501 | 2550 | 8.86588971243 |
| NM_000528    | MAN2B1  | 2351 | 2394 | 7.54378786723 |
| NM_000528    | MAN2B1  | 2561 | 2607 | 9.12892411804 |
| NM_000528    | MAN2B1  | 2438 | 2479 | 9.86588971243 |
| NM_000528    | MAN2B1  | 1912 | 1955 | 8.45982240816 |
| NM_000528    | MAN2B1  | 580  | 658  | 8.86588970488 |
| NM_000528    | MAN2B1  | 863  | 896  | 6.54378786723 |
| NM_000528    | MAN2B1  | 995  | 1044 | 6.45982240816 |
| NM_020812    | DOCK6   | 16   | 44   | 7.57017652578 |
| NM_001654    | ARAF    | 407  | 459  | 8.51126976386 |
| NM_001165895 | CD320   | 81   | 142  | 6.02850216846 |
| NM_001165895 | CD320   | 18   | 71   | 7.35043026335 |
| NM_001165895 | CD320   | 355  | 471  | 6.11264137785 |
| NM_032842    | TMEM209 | 1067 | 1094 | 8.87701479978 |
| NM_032842    | TMEM209 | 1283 | 1310 | 7.37619150844 |
| NM_032842    | TMEM209 | 228  | 271  | 9.87701479978 |

|              |            |      |      |                   |
|--------------|------------|------|------|-------------------|
| NM_032842    | TMEM209    | 741  | 858  | 11.3761915084     |
| NM_015140    | TTLL12     | 2    | 37   | 8.87842284775     |
| NM_001198845 | RBM14-RBM4 |      | 504  | 546 7.44715883078 |
| NM_000382    | ALDH3A2    | 22   | 98   | 7.27146895356     |
| NM_007176    | C14orf1    | 598  | 630  | 6.10335608781     |
| NM_007176    | C14orf1    | 673  | 718  | 7.40587011835     |
| NM_003870    | IQGAP1     | 3628 | 3668 | 6.62482256793     |
| NM_003878    | GGH        | 739  | 784  | 6.93520599543     |
| NM_145690    | YWHAZ      | 872  | 925  | 2.5943460921      |
| NM_025191    | EDEM3      | 472  | 494  | 6.13715421044     |
| NM_003380    | VIM        | 1723 | 1774 | 10.4143097163     |
| NM_003380    | VIM        | 1440 | 1488 | 11.2623063869     |
| NM_003380    | VIM        | 1038 | 1080 | 10.0923816214     |
| NM_003380    | VIM        | 1236 | 1285 | 9.67734412213     |
| NM_153377    | LRIG3      | 2262 | 2300 | 10.199534614      |
| NM_153377    | LRIG3      | 2872 | 2913 | 10.7846706291     |
| NM_153377    | LRIG3      | 1407 | 1465 | 10.7806532649     |
| NM_003234    | TFRC       | 1817 | 1900 | 5.99985213785     |
| NM_003234    | TFRC       | 2611 | 2663 | 4.71974398273     |
| NM_003234    | TFRC       | 1310 | 1393 | 6.77037029172     |
| NM_003234    | TFRC       | 469  | 543  | 6.08231429804     |
| NM_003234    | TFRC       | 1125 | 1206 | 6.16031681004     |
| NM_003234    | TFRC       | 997  | 1088 | 5.71974421865     |
| NM_003234    | TFRC       | 1275 | 1308 | 4.23431739148     |
| NM_003234    | TFRC       | 1987 | 2048 | 6.30470671937     |
| NM_003234    | TFRC       | 2081 | 2123 | 5.08231429804     |
| NM_003234    | TFRC       | 622  | 735  | 5.8192798922      |
| NM_003234    | TFRC       | 2520 | 2560 | 4.71974421865     |
| NM_003234    | TFRC       | 2138 | 2168 | 4.23431715556     |
| NM_003234    | TFRC       | 952  | 994  | 4.82825008721     |
| NM_003234    | TFRC       | 0    | 44   | 4.23431738393     |
| NM_003234    | TFRC       | 2366 | 2441 | 6.61282901474     |
| NM_003234    | TFRC       | 736  | 783  | 4.71974421865     |
| NM_003234    | TFRC       | 2054 | 2079 | 1.82825008721     |
| NM_003234    | TFRC       | 545  | 612  | 5.08231429804     |
| NM_003234    | TFRC       | 800  | 947  | 6.8192798922      |
| NM_003234    | TFRC       | 2168 | 2348 | 6.77037029172     |
| NM_003234    | TFRC       | 1235 | 1273 | 1.91238256554     |
| NM_003234    | TFRC       | 340  | 416  | 5.08231429804     |
| NM_003234    | TFRC       | 1393 | 1567 | 5.91238929659     |
| NM_003234    | TFRC       | 1619 | 1742 | 7.08231429804     |
| NM_003234    | TFRC       | 2448 | 2518 | 5.23431739148     |
| NM_001100400 | PDS5A      | 369  | 401  | 7.93109231643     |
| NM_001195731 | CHPF       | 373  | 469  | 7.56749743658     |
| NM_014501    | UBE2S      | 981  | 1032 | 7.02085720189     |
| NM_014506    | TOR1B      | 722  | 748  | 7.15790933047     |
| NM_014505    | KCNMB4     | 338  | 370  | 11.6674172822     |
| NM_005437    | NCOA4      | 1427 | 1495 | 2.29808048903     |
| NM_003129    | SQLE       | 1288 | 1334 | 5.54060253381     |
| NM_003129    | SQLE       | 2017 | 2075 | 7.27774187829     |

|              |          |      |      |                   |
|--------------|----------|------|------|-------------------|
| NM_003129    | SQLE     | 1382 | 1434 | 6.54076955307     |
| NM_003129    | SQLE     | 1455 | 1498 | 4.95564003309     |
| NM_003129    | SQLE     | 2174 | 2204 | 5.53675868395     |
| NM_003129    | SQLE     | 1680 | 1784 | 6.9558137834      |
| NM_003128    | SPTBN1   | 2283 | 2316 | 3.55168931024     |
| NM_003128    | SPTBN1   | 3352 | 3404 | 2.22958747259     |
| NM_003128    | SPTBN1   | 4778 | 4829 | 4.55168931779     |
| NM_003128    | SPTBN1   | 4513 | 4566 | 4.03711613742     |
| NM_003128    | SPTBN1   | 726  | 776  | 2.22574362273     |
| NM_003128    | SPTBN1   | 1852 | 1914 | 4.55168931779     |
| NM_003128    | SPTBN1   | 2207 | 2253 | 1.14562201352     |
| NM_003128    | SPTBN1   | 3660 | 3721 | 4.3996862168      |
| NM_003128    | SPTBN1   | 2805 | 2849 | 3.55168908188     |
| NM_003128    | SPTBN1   | 450  | 529  | 4.22976122291     |
| NM_003128    | SPTBN1   | 1392 | 1532 | 5.22976122291     |
| NM_003128    | SPTBN1   | 3486 | 3642 | 5.55168931779     |
| NM_003128    | SPTBN1   | 2586 | 2639 | 2.81454997331     |
| NM_003128    | SPTBN1   | 1761 | 1787 | 2.14562201352     |
| NM_003128    | SPTBN1   | 6156 | 6306 | 5.55168931779     |
| NM_003128    | SPTBN1   | 4702 | 4761 | 4.39968622434     |
| NM_003128    | SPTBN1   | 4378 | 4493 | 3.55168931779     |
| NM_003128    | SPTBN1   | 6375 | 6487 | 4.03711614474     |
| NM_003128    | SPTBN1   | 6634 | 6806 | 5.98464872507     |
| NM_003128    | SPTBN1   | 1545 | 1584 | 2.14562201352     |
| NM_003128    | SPTBN1   | 4278 | 4301 | 2.14562201352     |
| NM_003128    | SPTBN1   | 2700 | 2778 | 2.81472372341     |
| NM_003128    | SPTBN1   | 5122 | 5181 | 2.81454997331     |
| NM_003128    | SPTBN1   | 4041 | 4128 | 3.22976122291     |
| NM_003128    | SPTBN1   | 964  | 1039 | 2.81472372363     |
| NM_003128    | SPTBN1   | 5487 | 5668 | 4.93020094105     |
| NM_003128    | SPTBN1   | 6961 | 7041 | 4.81472372363     |
| NM_003128    | SPTBN1   | 5691 | 5783 | 3.55168931779     |
| NM_003128    | SPTBN1   | 3921 | 4022 | 3.81472372363     |
| NM_003128    | SPTBN1   | 2505 | 2577 | 3.81070612345     |
| NM_021991    | JUP      | 1292 | 1351 | 7.49148395607     |
| NM_003123    | SPN      | 2903 | 2929 | 12.0097214637     |
| NM_001035267 | RPL41    | 299  | 454  | 2.46410932686     |
| NM_021999    | ITM2B    | 467  | 511  | 5.01568746846     |
| NM_021999    | ITM2B    | 835  | 914  | 6.33761556334     |
| NM_021999    | ITM2B    | 684  | 751  | 4.60064996918     |
| NM_021999    | ITM2B    | 380  | 405  | 2.93154825907     |
| NM_021999    | ITM2B    | 522  | 559  | 4.0156807374      |
| NM_003655    | CBX4     | 1653 | 1691 | 5.70108017001     |
| NM_018424    | EPB41L4B |      | 241  | 270 6.83386375363 |
| NM_018060    | IARS2    | 849  | 909  | 5.1076108069      |
| NM_002387    | MCC      | 6828 | 6852 | 14.1189115063     |
| NM_002387    | MCC      | 2918 | 2938 | 13.2978134338     |
| NM_001204306 | GC       | 1513 | 1756 | 18.1612980599     |
| NM_001204306 | GC       | 175  | 878  | 20.0026003139     |
| NM_001204306 | GC       | 879  | 1503 | 20.2767752773     |



|              |          |      |      |                   |
|--------------|----------|------|------|-------------------|
| NM_005381    | NCL      | 698  | 767  | 2.3722334564      |
| NM_005381    | NCL      | 1995 | 2080 | 1.52423654984     |
| NM_005381    | NCL      | 806  | 938  | 2.90274816555     |
| NM_016827    | OGG1     | 132  | 156  | 5.99386432284     |
| NM_005389    | PCMT1    | 440  | 483  | 3.93943535054     |
| NM_001202439 | B7H6     | 1115 | 1161 | 8.45281092436     |
| NM_004240    | TRIP10   | 14   | 38   | 3.20758512637     |
| NM_001202431 | PRDX1    | 305  | 377  | 4.25823604281     |
| NM_001079559 | HNRNPUL2 |      | 449  | 526 5.61954361116 |
| NM_002526    | NT5E     | 2099 | 2136 | 9.17568533188     |
| NM_002526    | NT5E     | 1234 | 1293 | 9.69025177388     |
| NM_001144012 | TMX2     | 246  | 302  | 5.34736814469     |
| NM_001144012 | TMX2     | 411  | 492  | 7.15472306697     |
| NM_001144012 | TMX2     | 540  | 586  | 6.347367909       |
| NM_001144012 | TMX2     | 684  | 750  | 6.34736814491     |
| NM_002824    | PTMS     | 132  | 158  | 5.44257616531     |
| NM_002824    | PTMS     | 329  | 394  | 4.4425759294      |
| NM_015012    | TMEM41B  | 1121 | 1154 | 9.36277941566     |
| NM_015012    | TMEM41B  | 784  | 812  | 7.62580709045     |
| NM_134433    | RFX2     | 3167 | 3186 | 12.5450450289     |
| NM_017733    | PIGG     | 1646 | 1708 | 9.47830539897     |
| NM_017733    | PIGG     | 1367 | 1398 | 8.15637753245     |
| NM_017733    | PIGG     | 1271 | 1324 | 9.15637753245     |
| NM_001002860 | BTBD7    | 132  | 158  | 8.98558220692     |
| NM_001146082 | MBOAT7   | 1117 | 1174 | 10.5296598619     |
| NM_001146082 | MBOAT7   | 1496 | 1533 | 9.72230516821     |
| NM_001146082 | MBOAT7   | 1053 | 1103 | 8.71828757559     |
| NM_016930    | STX18    | 327  | 361  | 6.06400387399     |
| NM_004362    | CLGN     | 327  | 360  | 6.09728182259     |
| NM_004362    | CLGN     | 195  | 245  | 7.41938366779     |
| NM_004362    | CLGN     | 448  | 478  | 6.90481049496     |
| NM_004362    | CLGN     | 566  | 594  | 7.09745557291     |
| NM_004362    | CLGN     | 1425 | 1471 | 6.82067128558     |
| NM_004362    | CLGN     | 1171 | 1219 | 7.09745557269     |
| NM_004362    | CLGN     | 1862 | 1927 | 4.09745557269     |
| NM_004362    | CLGN     | 370  | 433  | 6.09745533699     |
| NM_004362    | CLGN     | 1661 | 1698 | 6.09343797273     |
| NM_004362    | CLGN     | 1326 | 1372 | 5.67840047346     |
| NM_004363    | CEACAM5  | 599  | 639  | 11.553281179      |
| NM_004360    | CDH1     | 982  | 1009 | 7.66605113694     |
| NM_004360    | CDH1     | 2688 | 2731 | 6.75019033877     |
| NM_004360    | CDH1     | 1591 | 1635 | 8.7501903461      |
| NM_004360    | CDH1     | 2251 | 2308 | 7.75019034632     |
| NM_004360    | CDH1     | 1305 | 1338 | 8.07211820529     |
| NM_004360    | CDH1     | 2643 | 2681 | 8.07211820529     |
| NM_004360    | CDH1     | 2171 | 2223 | 5.750016596       |
| NM_004360    | CDH1     | 2571 | 2629 | 7.75019034632     |
| NM_004360    | CDH1     | 1672 | 1797 | 10.209621965      |
| NM_004360    | CDH1     | 2368 | 2441 | 8.75019034632     |
| NM_004360    | CDH1     | 1857 | 1896 | 7.33515261112     |

|              |          |      |      |                    |
|--------------|----------|------|------|--------------------|
| NM_004360    | CDH1     | 728  | 801  | 8.33515284682      |
| NM_004360    | CDH1     | 1092 | 1143 | 7.74617274615      |
| NM_004367    | CCR6     | 1118 | 1151 | 9.85810748983      |
| NM_004367    | CCR6     | 906  | 959  | 9.62031836841      |
| NM_004367    | CCR6     | 1259 | 1322 | 11.3207583225      |
| NM_004364    | CEBPA    | 448  | 475  | 7.52244902417      |
| NM_144572    | TBC1D2B  | 18   | 52   | 8.45840366175      |
| NM_181783    | TMTC3    | 1588 | 1618 | 10.1863835065      |
| NM_181783    | TMTC3    | 1826 | 1877 | 10.449244162       |
| NM_018842    | BAIAP2L1 |      | 1748 | 1805 4.23145882293 |
| NM_024650    | C11orf80 |      | 925  | 969 11.5397993096  |
| NM_024650    | C11orf80 |      | 84   | 116 8.73244462345  |
| NM_024652    | LRRK1    | 141  | 162  | 13.9935042818      |
| NM_024656    | GLT25D1  | 1268 | 1335 | 7.65499791265      |
| NM_024656    | GLT25D1  | 355  | 437  | 7.07003540438      |
| NM_024656    | GLT25D1  | 1343 | 1397 | 8.07003541193      |
| NM_024656    | GLT25D1  | 3118 | 3166 | 7.87337273381      |
| NM_024656    | GLT25D1  | 996  | 1042 | 5.07003541171      |
| NM_024656    | GLT25D1  | 1410 | 1455 | 7.57085870327      |
| NM_024656    | GLT25D1  | 1815 | 1887 | 7.65499791265      |
| NM_024656    | GLT25D1  | 473  | 558  | 7.65499791265      |
| NM_024656    | GLT25D1  | 1689 | 1777 | 7.65499791265      |
| NM_001077180 | METTL9   | 875  | 910  | 7.19590395413      |
| NM_001136137 | RPL28    | 58   | 99   | 0.281224069395     |
| NM_001136137 | RPL28    | 146  | 209  | 0.780400770509     |
| NM_178549    | ZNF678   | 6260 | 6279 | 10.1980293267      |
| NM_018361    | AGPAT5   | 638  | 687  | 3.51660246019      |
| NM_015245    | ANKS1A   | 260  | 301  | 6.45022148266      |
| NM_018369    | DEPDC1B  | 211  | 231  | 6.44508571854      |
| NM_018368    | LMBRD1   | 857  | 898  | 6.81433328576      |
| NM_018368    | LMBRD1   | 589  | 630  | 6.3992960224       |
| NM_018368    | LMBRD1   | 1142 | 1203 | 3.81433352168      |
| NM_018368    | LMBRD1   | 1828 | 1886 | 5.81433351413      |
| NM_018368    | LMBRD1   | 687  | 724  | 3.81432679063      |
| NM_018368    | LMBRD1   | 508  | 540  | 5.39929602218      |
| NM_018368    | LMBRD1   | 957  | 1017 | 7.62168844374      |
| NM_018368    | LMBRD1   | 546  | 575  | 5.31515681302      |
| NM_019015    | CHPF2    | 1070 | 1110 | 7.2091601886       |
| NM_019015    | CHPF2    | 3159 | 3230 | 8.79796653918      |
| NM_005177    | ATP6V0A1 |      | 2159 | 2200 7.82150675504 |
| NM_005177    | ATP6V0A1 |      | 1743 | 1774 8.71300088648 |
| NM_005177    | ATP6V0A1 |      | 2235 | 2293 9.22756732826 |
| NM_005177    | ATP6V0A1 |      | 1622 | 1663 5.90563923337 |
| NM_006996    | SLC19A2  | 225  | 258  | 9.80329832416      |
| NM_022892    | NAIP     | 210  | 230  | 9.90455939909      |
| NM_018344    | SLC29A3  | 1223 | 1254 | 8.93149795775      |
| NM_018344    | SLC29A3  | 1107 | 1135 | 10.5164604585      |
| NM_001143958 | TMEM30A  | 765  | 807  | 8.0441319575       |
| NM_001143958 | TMEM30A  | 1074 | 1130 | 9.95102278903      |
| NM_001143958 | TMEM30A  | 519  | 554  | 8.0441319575       |

|              |              |      |               |               |
|--------------|--------------|------|---------------|---------------|
| NM_001143958 | TMEM30A 1012 | 1053 | 9.85148711548 |               |
| NM_001143958 | TMEM30A 917  | 959  | 8.36605355725 |               |
| NM_001143958 | TMEM30A 1134 | 1200 | 8.62909469392 |               |
| NM_001143958 | TMEM30A 266  | 328  | 8.36588653799 |               |
| NM_001143958 | TMEM30A 434  | 497  | 7.62908796309 |               |
| NM_001143958 | TMEM30A 815  | 856  | 6.95999298404 |               |
| NM_001143958 | TMEM30A 555  | 622  | 6.04412546237 |               |
| NM_016639    | TNFRSF12A    | 331  | 397           | 8.7566958931  |
| NM_016639    | TNFRSF12A    | 65   | 104           | 6.94532337087 |
| NM_016639    | TNFRSF12A    | 197  | 260           | 8.27126233488 |
| NM_001198827 | C8orf58 1726 | 1746 | 11.8334465421 |               |
| NM_053039    | UGT2B28 999  | 1034 | 10.5847584181 |               |
| NM_053039    | UGT2B28 1042 | 1072 | 7.50061920869 |               |
| NM_053039    | UGT2B28 908  | 933  | 8.58475818215 |               |
| NM_053039    | UGT2B28 55   | 88   | 7.50061920869 |               |
| NM_003816    | ADAM9 2231   | 2260 | 5.48717377838 |               |
| NM_003816    | ADAM9 757    | 810  | 4.98799730564 |               |
| NM_003816    | ADAM9 2140   | 2191 | 6.29452893613 |               |
| NM_003816    | ADAM9 998    | 1031 | 6.07212978397 |               |
| NM_003816    | ADAM9 1436   | 1491 | 6.80910210164 |               |
| NM_003816    | ADAM9 454    | 510  | 6.07213651502 |               |
| NM_003816    | ADAM9 2058   | 2136 | 5.80910210919 |               |
| NM_003816    | ADAM9 1326   | 1419 | 7.65709901574 |               |
| NM_003816    | ADAM9 1698   | 1752 | 3.40303480491 |               |
| NM_003816    | ADAM9 1942   | 2054 | 7.39406460991 |               |
| NM_003816    | ADAM9 565    | 605  | 5.48716728324 |               |
| NM_003816    | ADAM9 836    | 947  | 8.01073597036 |               |
| NM_001679    | ATP1B3 693   | 758  | 8.44601226001 |               |
| NM_001679    | ATP1B3 945   | 990  | 8.44601226001 |               |
| NM_001679    | ATP1B3 530   | 582  | 7.57153641104 |               |
| NM_001679    | ATP1B3 897   | 936  | 4.9825630412  |               |
| NM_001679    | ATP1B3 1148  | 1223 | 8.15650563527 |               |
| NM_001679    | ATP1B3 311   | 381  | 7.56752554192 |               |
| NM_004289    | NFE2L3 807   | 851  | 8.14084185184 |               |
| NM_004289    | NFE2L3 1647  | 1676 | 5.55588608195 |               |
| NM_004289    | NFE2L3 271   | 309  | 5.551868482   |               |
| NM_004289    | NFE2L3 1396  | 1428 | 6.47174687279 |               |
| NM_004289    | NFE2L3 1789  | 1886 | 8.87781417706 |               |
| NM_001671    | ASGR1 776    | 833  | 2.46611948411 |               |
| NM_001671    | ASGR1 556    | 604  | 3.19906748565 |               |
| NM_001671    | ASGR1 275    | 376  | 3.88115699094 |               |
| NM_001671    | ASGR1 1049   | 1213 | 6.1665592098  |               |
| NM_001671    | ASGR1 868    | 1001 | 5.12908450438 |               |
| NM_001677    | ATP1B1 177   | 220  | 5.43149426219 |               |
| NM_001677    | ATP1B1 61    | 120  | 5.53102993574 |               |
| NM_001677    | ATP1B1 1767  | 1813 | 5.20910184086 |               |
| NM_001677    | ATP1B1 234   | 283  | 2.62413910422 |               |
| NM_001677    | ATP1B1 462   | 619  | 8.11599243647 |               |
| NM_001677    | ATP1B1 892   | 1036 | 7.08357095877 |               |
| NM_001677    | ATP1B1 731   | 888  | 7.64650715316 |               |

|              |         |       |       |               |
|--------------|---------|-------|-------|---------------|
| NM_001677    | ATP1B1  | 356   | 452   | 6.32457905828 |
| NM_020765    | UBR4    | 13892 | 13919 | 6.71908642322 |
| NM_000108    | DLD     | 2314  | 2333  | 4.92676436982 |
| NM_000101    | CYBA    | 643   | 689   | 8.89409663528 |
| NM_000101    | CYBA    | 328   | 384   | 9.11648905662 |
| NM_000101    | CYBA    | 56    | 107   | 6.89409639936 |
| NM_000101    | CYBA    | 263   | 328   | 7.63106222944 |
| NM_000101    | CYBA    | 393   | 459   | 8.7685657532  |
| NM_024003    | L1CAM   | 1246  | 1301  | 12.3490429937 |
| NM_024003    | L1CAM   | 645   | 695   | 12.1699740469 |
| NM_024003    | L1CAM   | 2515  | 2559  | 12.1701410662 |
| NM_024003    | L1CAM   | 106   | 161   | 10.8482197023 |
| NM_024003    | L1CAM   | 2295  | 2335  | 10.7640804929 |
| NM_024003    | L1CAM   | 1764  | 1809  | 12.6555746244 |
| NM_024003    | L1CAM   | 2032  | 2081  | 12.8482196948 |
| NM_024003    | L1CAM   | 3546  | 3621  | 11.3490429937 |
| NM_024003    | L1CAM   | 1367  | 1456  | 12.8482197023 |
| NM_024003    | L1CAM   | 3510  | 3537  | 9.76408049294 |
| NM_024003    | L1CAM   | 1481  | 1565  | 12.8482197023 |
| NM_024003    | L1CAM   | 991   | 1074  | 11.4331819671 |
| NM_133450    | ANKS3   | 102   | 122   | 9.50026129042 |
| NM_173542    | PLBD2   | 677   | 721   | 7.11711853597 |
| NM_173542    | PLBD2   | 1142  | 1193  | 8.70592488654 |
| NM_001146277 | NCEH1   | 1394  | 1431  | 9.46639995234 |
| NM_006280    | SSR4    | 675   | 703   | 6.70175247823 |
| NM_006280    | SSR4    | 231   | 293   | 8.37085418833 |
| NM_006280    | SSR4    | 520   | 614   | 8.78589168762 |
| NM_006280    | SSR4    | 313   | 417   | 9.37085418834 |
| NM_006284    | TAF10   | 192   | 236   | 5.79592504992 |
| NM_005410    | SEPP1   | 215   | 311   | 5.76553647768 |
| NM_005415    | SLC20A1 | 2408  | 2455  | 7.71573656499 |
| NM_005415    | SLC20A1 | 790   | 829   | 6.71572983393 |
| NM_005415    | SLC20A1 | 1509  | 1560  | 6.97876423977 |
| NM_005415    | SLC20A1 | 2239  | 2285  | 6.38979086993 |
| NM_005415    | SLC20A1 | 866   | 908   | 6.6315973556  |
| NM_005415    | SLC20A1 | 470   | 529   | 4.38979086993 |
| NM_005415    | SLC20A1 | 1261  | 1323  | 6.71573655744 |
| NM_005415    | SLC20A1 | 1813  | 1885  | 5.9787707349  |
| NM_003107    | S0X4    | 1452  | 1476  | 10.9072338491 |
| NM_003107    | S0X4    | 1933  | 2023  | 13.3133011534 |
| NM_003101    | S0AT1   | 1701  | 1789  | 9.71259758764 |
| NM_003101    | S0AT1   | 1615  | 1692  | 9.86460068109 |
| NM_003101    | S0AT1   | 1294  | 1337  | 8.1274613366  |
| NM_003101    | S0AT1   | 1340  | 1366  | 7.45853337682 |
| NM_003101    | S0AT1   | 1422  | 1497  | 8.5426725862  |
| NM_003101    | S0AT1   | 1503  | 1561  | 8.12763507937 |
| NM_003101    | S0AT1   | 1567  | 1608  | 8.54266585515 |
| NM_003101    | S0AT1   | 873   | 943   | 8.12763508692 |
| NM_006310    | NPEPPS  | 237   | 299   | 3.04723923915 |
| NM_001077663 | URGCP   | 3254  | 3296  | 9.61542975966 |

|              |         |      |      |               |
|--------------|---------|------|------|---------------|
| NM_032086    | PCDHGA6 | 1114 | 1134 | 12.9566296693 |
| NM_015388    | YIPF3   | 915  | 993  | 7.8383515828  |
| NM_001034116 | EIF2B4  | 383  | 403  | 7.31242705277 |
| NM_002508    | NID1    | 1578 | 1627 | 6.35191360344 |
| NM_002508    | NID1    | 3558 | 3640 | 7.17503584136 |
| NM_002508    | NID1    | 3023 | 3119 | 7.6514738853  |
| NM_002508    | NID1    | 3767 | 3849 | 5.97340198019 |
| NM_002508    | NID1    | 2329 | 2374 | 6.11090550394 |
| NM_002508    | NID1    | 1864 | 1917 | 4.97340174427 |
| NM_002508    | NID1    | 3294 | 3322 | 4.15229717664 |
| NM_002508    | NID1    | 648  | 677  | 4.23241878585 |
| NM_002508    | NID1    | 3333 | 3380 | 2.65147388508 |
| NM_002508    | NID1    | 764  | 793  | 3.56733467592 |
| NM_002508    | NID1    | 2197 | 2236 | 5.45882880736 |
| NM_002508    | NID1    | 1000 | 1038 | 3.65146715425 |
| NM_002508    | NID1    | 223  | 254  | 3.64745628513 |
| NM_002508    | NID1    | 2531 | 2558 | 3.56733467592 |
| NM_002508    | NID1    | 1198 | 1244 | 5.97339524913 |
| NM_002508    | NID1    | 1524 | 1562 | 2.56733467592 |
| NM_002508    | NID1    | 1653 | 1696 | 4.65146715425 |
| NM_002508    | NID1    | 2947 | 2993 | 4.23241878585 |
| NM_002508    | NID1    | 857  | 998  | 8.23643638602 |
| NM_002508    | NID1    | 3382 | 3457 | 5.6514738853  |
| NM_002508    | NID1    | 3137 | 3285 | 6.82139888674 |
| NM_002508    | NID1    | 1707 | 1806 | 5.6514738853  |
| NM_002508    | NID1    | 119  | 198  | 4.65147388508 |
| NM_002508    | NID1    | 1477 | 1515 | 3.65130013498 |
| NM_002508    | NID1    | 413  | 459  | 4.23642965497 |
| NM_002508    | NID1    | 2095 | 2175 | 5.45882857144 |
| NM_002508    | NID1    | 1950 | 2076 | 6.45882880736 |
| NM_001144032 | PPIAL4E | 531  | 561  | 8.00457524045 |
| NM_003131    | SRF     | 895  | 919  | 7.28841948241 |
| NM_003131    | SRF     | 443  | 469  | 6.29243035153 |
| NM_001039457 | ATP6V0B | 465  | 545  | 10.593321448  |
| NM_015030    | FRYL    | 1990 | 2010 | 9.30818828368 |
| NM_015033    | FNBP1   | 2316 | 2339 | 6.74874659908 |
| NM_030810    | TXNDC5  | 1072 | 1129 | 4.86449282813 |
| NM_030810    | TXNDC5  | 378  | 451  | 4.76495715458 |
| NM_030810    | TXNDC5  | 178  | 229  | 2.95760222498 |
| NM_030810    | TXNDC5  | 1133 | 1204 | 3.95760223253 |
| NM_030810    | TXNDC5  | 1756 | 1796 | 3.76093955441 |
| NM_030810    | TXNDC5  | 321  | 358  | 3.95760223253 |
| NM_030810    | TXNDC5  | 993  | 1054 | 1.87346302314 |
| NM_030810    | TXNDC5  | 66   | 134  | 2.53854713307 |
| NM_030810    | TXNDC5  | 664  | 700  | 2.53854713307 |
| NM_030810    | TXNDC5  | 500  | 639  | 4.86449282813 |
| NM_030810    | TXNDC5  | 705  | 955  | 6.00199635188 |
| NM_030810    | TXNDC5  | 1243 | 1337 | 3.27953032741 |
| NM_001009184 | GRINA   | 1637 | 1673 | 4.61764173445 |
| NM_001009184 | GRINA   | 1050 | 1115 | 5.94358742929 |

|              |          |      |      |                    |
|--------------|----------|------|------|--------------------|
| NM_012384    | GMEB2    | 67   | 98   | 7.96502482382      |
| NM_001085    | SERPINA3 |      | 1145 | 1185 5.18128930412 |
| NM_001085    | SERPINA3 |      | 1023 | 1133 4.44432370996 |
| NM_001085    | SERPINA3 |      | 603  | 687 4.97483842665  |
| NM_001085    | SERPINA3 |      | 510  | 573 4.08175363035  |
| NM_001089    | ABCA3    | 2256 | 2301 | 13.2468959718      |
| NM_001089    | ABCA3    | 5239 | 5264 | 12.2468959718      |
| NM_001089    | ABCA3    | 2044 | 2103 | 14.250906841       |
| NM_001089    | ABCA3    | 6540 | 6616 | 14.2468959718      |
| NM_213649    | SFXN4    | 687  | 707  | 5.78171285718      |
| NM_213647    | FGFR4    | 314  | 355  | 7.82906515499      |
| NM_213647    | FGFR4    | 1524 | 1581 | 7.2441093851       |
| NM_213647    | FGFR4    | 1038 | 1090 | 6.24009178514      |
| NM_213647    | FGFR4    | 412  | 454  | 8.24410938532      |
| NM_213647    | FGFR4    | 1882 | 1919 | 6.82505428587      |
| NM_213647    | FGFR4    | 2516 | 2567 | 7.82505428587      |
| NM_213647    | FGFR4    | 870  | 901  | 7.82505428587      |
| NM_213647    | FGFR4    | 2244 | 2306 | 8.2441091494       |
| NM_213647    | FGFR4    | 1189 | 1231 | 6.24410265426      |
| NM_213647    | FGFR4    | 2081 | 2167 | 8.41403438676      |
| NM_213647    | FGFR4    | 1724 | 1842 | 8.94454910346      |
| NM_213647    | FGFR4    | 232  | 308  | 7.24410938531      |
| NM_017712    | PGPEP1   | 1622 | 1664 | 7.18806496947      |
| NM_001032363 | C1orf151 |      | 3443 | 3461 4.96836863064 |
| NM_001032367 | SPINT1   | 1377 | 1430 | 11.6198639469      |
| NM_001032367 | SPINT1   | 1221 | 1280 | 13.2048264476      |
| NM_001032367 | SPINT1   | 1433 | 1492 | 12.297935616       |
| NM_001032367 | SPINT1   | 987  | 1023 | 12.297935616       |
| NM_001032367 | SPINT1   | 2032 | 2078 | 11.2939182518      |
| NM_001032367 | SPINT1   | 1331 | 1375 | 10.2137966426      |
| NM_001032367 | SPINT1   | 244  | 308  | 10.8788807525      |
| NM_001032367 | SPINT1   | 458  | 496  | 9.21379664258      |
| NM_001032367 | SPINT1   | 1090 | 1203 | 10.8828983527      |
| NM_033200    | LMF2     | 1532 | 1573 | 10.3411182619      |
| NM_033200    | LMF2     | 1402 | 1477 | 10.8305626892      |
| NM_033200    | LMF2     | 413  | 450  | 9.60799651759      |
| NM_033200    | LMF2     | 729  | 774  | 11.6081702679      |
| NM_033200    | LMF2     | 1484 | 1524 | 10.8265450891      |
| NM_033200    | LMF2     | 1132 | 1188 | 10.0230340169      |
| NM_033200    | LMF2     | 1196 | 1288 | 11.4826393858      |
| NM_001889    | CRYZ     | 1858 | 1878 | 5.90407207276      |
| NM_001134232 | TMEM106B |      | 938  | 975 8.045635669    |
| NM_001134232 | TMEM106B |      | 523  | 574 8.36354616372  |
| NM_004343    | CALR     | 144  | 205  | 5.15273127733      |
| NM_004343    | CALR     | 298  | 331  | 1.83062943213      |
| NM_004343    | CALR     | 643  | 694  | 4.24584068173      |
| NM_004343    | CALR     | 1428 | 1478 | 3.83080318245      |
| NM_004343    | CALR     | 1302 | 1374 | 3.41576567562      |
| NM_004343    | CALR     | 223  | 283  | 0.245840674177     |
| NM_004343    | CALR     | 695  | 891  | 6.93234120891      |

|              |          |      |      |                  |
|--------------|----------|------|------|------------------|
| NM_004343    | CALR     | 513  | 643  | 5.8004295334     |
| NM_004343    | CALR     | 1084 | 1301 | 6.62088011307    |
| NM_004343    | CALR     | 338  | 507  | 5.97376113629    |
| NM_004343    | CALR     | 892  | 962  | 1.24584067418    |
| NM_004343    | CALR     | 965  | 1074 | 5.45529404736    |
| NM_004616    | TSPAN8   | 338  | 370  | 12.0929268364    |
| NM_004616    | TSPAN8   | 806  | 840  | 10.7710054726    |
| NM_004616    | TSPAN8   | 629  | 664  | 9.77099874155    |
| NM_004617    | TM4SF4   | 573  | 626  | 13.9334921424    |
| NM_004617    | TM4SF4   | 427  | 571  | 14.7021665963    |
| NM_004617    | TM4SF4   | 671  | 741  | 11.17860464      |
| NM_004617    | TM4SF4   | 746  | 958  | 14.2229987596    |
| NM_004615    | TSPAN7   | 626  | 651  | 6.73451391034    |
| NM_004615    | TSPAN7   | 409  | 494  | 6.73853151052    |
| NM_134428    | RFX3     | 43   | 75   | 7.91374197911    |
| NM_001037290 | BC02     | 1660 | 1681 | 12.1083390246    |
| NM_020531    | C20orf3  | 757  | 797  | 5.10754373742    |
| NM_020531    | C20orf3  | 563  | 597  | 5.10736998733    |
| NM_020531    | C20orf3  | 955  | 1000 | 5.1075437301     |
| NM_020531    | C20orf3  | 802  | 841  | 5.69250623837    |
| NM_020531    | C20orf3  | 625  | 673  | 5.69250623082    |
| NM_020531    | C20orf3  | 1153 | 1221 | 5.69250623814    |
| NM_020531    | C20orf3  | 517  | 562  | 5.10754373742    |
| NM_020531    | C20orf3  | 223  | 313  | 6.10754373764    |
| NM_172209    | TAPBP    | 558  | 639  | 11.7855320791    |
| NM_172209    | TAPBP    | 1223 | 1261 | 9.91088921083    |
| NM_172209    | TAPBP    | 419  | 461  | 9.32609372937    |
| NM_172209    | TAPBP    | 782  | 820  | 9.32609372937    |
| NM_172209    | TAPBP    | 920  | 968  | 11.7853583287    |
| NM_172209    | TAPBP    | 695  | 754  | 9.9110629536     |
| NM_000821    | GGCX     | 633  | 672  | 8.22103810449    |
| NM_000821    | GGCX     | 1762 | 1805 | 7.99847193284    |
| NM_000821    | GGCX     | 1547 | 1584 | 6.32954397305    |
| NM_000821    | GGCX     | 1252 | 1299 | 6.40966558226    |
| NM_000821    | GGCX     | 2174 | 2215 | 8.58360818365    |
| NM_000821    | GGCX     | 1613 | 1645 | 6.91450647377    |
| NM_000821    | GGCX     | 916  | 982  | 7.99864567561    |
| NM_000821    | GGCX     | 1700 | 1758 | 6.99864568315    |
| NM_000821    | GGCX     | 380  | 400  | 6.91450647377    |
| NM_000821    | GGCX     | 2096 | 2125 | 6.32954397305    |
| NM_000821    | GGCX     | 708  | 788  | 8.58360818388    |
| NM_001136562 | AKAP2    | 1613 | 1633 | 7.73258471755    |
| NM_006612    | KIF1C    | 3152 | 3241 | 5.2217270298     |
| NM_006612    | KIF1C    | 1679 | 1756 | 5.80284568067    |
| NM_006612    | KIF1C    | 4034 | 4096 | 4.72272407146    |
| NM_006612    | KIF1C    | 2289 | 2323 | 5.21788317995    |
| NM_006612    | KIF1C    | 1779 | 1897 | 6.02925570218    |
| NM_145246    | FRA10AC1 |      | 20   | 71 6.57843180756 |
| NM_002972    | SBF1     | 5722 | 5774 | 6.7312799392     |
| NM_002972    | SBF1     | 672  | 727  | 6.23045641195    |

|              |          |      |      |                   |
|--------------|----------|------|------|-------------------|
| NM_001657    | AREG     | 761  | 802  | 8.93866076724     |
| NM_001657    | AREG     | 582  | 612  | 8.60374487717     |
| NM_001657    | AREG     | 138  | 197  | 7.01878237645     |
| NM_001657    | AREG     | 939  | 988  | 8.60776246979     |
| NM_002752    | MAPK9    | 74   | 108  | 4.9978991756      |
| NM_031479    | INHBE    | 1428 | 1496 | 8.6055423096      |
| NM_031479    | INHBE    | 928  | 966  | 7.02040629448     |
| NM_031479    | INHBE    | 1136 | 1202 | 8.82793473094     |
| NM_031479    | INHBE    | 870  | 912  | 9.34250140863     |
| NM_031479    | INHBE    | 1205 | 1292 | 9.60554254552     |
| NM_031479    | INHBE    | 553  | 631  | 9.02058004458     |
| NM_031479    | INHBE    | 978  | 1025 | 8.02057331374     |
| NM_031479    | INHBE    | 695  | 859  | 10.4800116634     |
| NM_024635    | NAA35    | 23   | 41   | 6.70798382985     |
| NM_024632    | SAP30L   | 2157 | 2178 | 4.95367145403     |
| NM_001024956 | SC5DL    | 488  | 515  | 6.03013638415     |
| NM_001024956 | SC5DL    | 925  | 975  | 6.94599717499     |
| NM_001024956 | SC5DL    | 594  | 637  | 5.94599717499     |
| NM_031212    | SLC25A28 |      | 239  | 264 8.52672036414 |
| NM_031212    | SLC25A28 |      | 84   | 108 5.3566216126  |
| NM_001136153 | ATF6B    | 532  | 569  | 9.91650634905     |
| NM_001136153 | ATF6B    | 1532 | 1572 | 9.26367323322     |
| NM_021814    | ELOVL5   | 874  | 963  | 9.3278169328      |
| NM_021814    | ELOVL5   | 1167 | 1212 | 8.96524685364     |
| NM_021814    | ELOVL5   | 1068 | 1120 | 7.7428544323      |
| NM_021814    | ELOVL5   | 810  | 864  | 8.96524685363     |
| NM_021814    | ELOVL5   | 671  | 808  | 10.0647825272     |
| NM_001961    | EEF2     | 2625 | 2681 | 0.948931368314    |
| NM_001961    | EEF2     | 785  | 895  | 2.75628652629     |
| NM_001961    | EEF2     | 1982 | 2035 | 1.75628651874     |
| NM_001961    | EEF2     | 528  | 577  | 0.94491400406     |
| NM_001961    | EEF2     | 694  | 757  | 0.94491400406     |
| NM_001961    | EEF2     | 1466 | 1529 | 2.11885660568     |
| NM_001961    | EEF2     | 2091 | 2141 | 2.11885660568     |
| NM_001961    | EEF2     | 6    | 141  | 1.53389410495     |
| NM_001961    | EEF2     | 2145 | 2208 | 1.2708594632      |
| NM_001961    | EEF2     | 448  | 509  | 0.948931596684    |
| NM_001961    | EEF2     | 1182 | 1233 | 0.533887373901    |
| NM_001961    | EEF2     | 958  | 1128 | 3.03639444548     |
| NM_001961    | EEF2     | 1713 | 1932 | 4.27085969912     |
| NM_001961    | EEF2     | 293  | 442  | 2.27085969912     |
| NM_014714    | IFT140   | 4992 | 5012 | 9.59114046003     |
| NM_014718    | CLSTN3   | 29   | 79   | 6.43855517566     |
| NM_014718    | CLSTN3   | 2443 | 2508 | 7.6084801771      |
| NM_014718    | CLSTN3   | 2362 | 2413 | 7.33004930709     |
| NM_014718    | CLSTN3   | 1079 | 1110 | 7.52268765399     |
| NM_014718    | CLSTN3   | 660  | 732  | 7.3300493071      |
| NM_014718    | CLSTN3   | 1745 | 1781 | 4.52252063472     |
| NM_014718    | CLSTN3   | 489  | 532  | 4.43855517566     |
| NM_014718    | CLSTN3   | 3017 | 3090 | 7.33004930687     |



|              |          |       |       |                    |
|--------------|----------|-------|-------|--------------------|
| NM_014718    | CLSTN3   | 2831  | 2860  | 7.02351767638      |
| NM_014718    | CLSTN3   | 2939  | 3002  | 5.52269437749      |
| NM_014718    | CLSTN3   | 2226  | 2261  | 5.52268765399      |
| NM_014718    | CLSTN3   | 1584  | 1644  | 6.52252063472      |
| NM_005996    | TBX3     | 58    | 102   | 9.12946370334      |
| NM_001114394 | PAPD4    | 398   | 422   | 6.71365283307      |
| NM_152924    | ABHD2    | 1597  | 1661  | 8.83400868689      |
| NM_152924    | ABHD2    | 581   | 630   | 9.31960926438      |
| NM_001001486 | ATP2C1   | 2136  | 2173  | 4.33800700326      |
| NM_001097620 | TMEM184A |       | 659   | 708 11.4303569482  |
| NM_014345    | ZNF318   | 6762  | 6782  | 5.29713974608      |
| NM_020854    | KIAA1468 |       | 567   | 588 9.46395621105  |
| NM_001143973 | TCTN3    | 482   | 536   | 9.25699037533      |
| NM_001013660 | FRRS1    | 842   | 885   | 7.93967847308      |
| NM_001013660 | FRRS1    | 1356  | 1421  | 8.75105099509      |
| NM_001013660 | FRRS1    | 2164  | 2200  | 8.26562416792      |
| NM_194463    | RNF128   | 1221  | 1253  | 3.67254698271      |
| NM_194463    | RNF128   | 1043  | 1089  | 3.67271400197      |
| NM_001478    | B4GALNT1 |       | 1562  | 1624 13.3827829103 |
| NM_004111    | FEN1     | 1036  | 1074  | 7.03476294295      |
| NM_007138    | ZNF90    | 326   | 349   | 13.5033475148      |
| NM_030665    | RAI1     | 6358  | 6377  | 9.76246702416      |
| NM_015833    | ADARB1   | 16    | 47    | 8.54776640699      |
| NM_002415    | MIF      | 48    | 105   | 0.63980109825      |
| NM_020702    | KIAA1161 |       | 1692  | 1756 10.0752108773 |
| NM_000120    | EPHX1    | 721   | 778   | 9.25061311513      |
| NM_000120    | EPHX1    | 1387  | 1461  | 9.71004472622      |
| NM_000120    | EPHX1    | 1156  | 1217  | 9.25061311513      |
| NM_000120    | EPHX1    | 597   | 623   | 7.25060638408      |
| NM_000120    | EPHX1    | 679   | 716   | 6.25061310758      |
| NM_000120    | EPHX1    | 527   | 577   | 8.25061311513      |
| NM_000120    | EPHX1    | 1258  | 1315  | 6.25060638408      |
| NM_024029    | YIPF2    | 705   | 748   | 9.50678525395      |
| NM_001142622 | GHDC     | 698   | 740   | 8.55699457673      |
| NM_021034    | IFITM3   | 326   | 395   | 7.42613245979      |
| NM_021034    | IFITM3   | 512   | 567   | 6.42613245224      |
| NM_021034    | IFITM3   | 397   | 493   | 9.3330230554       |
| NM_021034    | IFITM3   | 201   | 264   | 7.01108822946      |
| NM_000384    | APOB     | 1755  | 1823  | 3.32899732104      |
| NM_000384    | APOB     | 2831  | 2902  | 4.32899732104      |
| NM_000384    | APOB     | 5030  | 5089  | 2.32899732082      |
| NM_000384    | APOB     | 5981  | 6043  | 3.65092541593      |
| NM_000384    | APOB     | 12125 | 12222 | 3.74403482032      |
| NM_000384    | APOB     | 5097  | 5179  | 3.83149766157      |
| NM_000384    | APOB     | 6992  | 7041  | 2.55138974238      |
| NM_000384    | APOB     | 9329  | 9365  | 2.55138974237      |
| NM_000384    | APOB     | 1305  | 1349  | 3.65092541593      |
| NM_000384    | APOB     | 286   | 360   | 4.32899732104      |
| NM_000384    | APOB     | 1398  | 1420  | 1.74001722015      |
| NM_000384    | APOB     | 5402  | 5470  | 4.44447453846      |

|           |      |       |       |                 |
|-----------|------|-------|-------|-----------------|
| NM_000384 | APOB | 4283  | 4332  | 1.32899732104   |
| NM_000384 | APOB | 8963  | 9036  | 2.74403482032   |
| NM_000384 | APOB | 1086  | 1154  | 3.20346643896   |
| NM_000384 | APOB | 13271 | 13335 | 3.20346643896   |
| NM_000384 | APOB | 7772  | 7826  | 4.32899732104   |
| NM_000384 | APOB | 10358 | 10407 | 2.74403482032   |
| NM_000384 | APOB | 9140  | 9194  | 2.32899732104   |
| NM_000384 | APOB | 647   | 684   | 2.55138973483   |
| NM_000384 | APOB | 13557 | 13598 | 1.65989561094   |
| NM_000384 | APOB | 4332  | 4379  | 3.91395982176   |
| NM_000384 | APOB | 3867  | 3892  | -0.259982779854 |
| NM_000384 | APOB | 9913  | 9948  | 2.06578916489   |
| NM_000384 | APOB | 7455  | 7531  | 3.55138974238   |
| NM_000384 | APOB | 9821  | 9878  | 2.91395982176   |
| NM_000384 | APOB | 8794  | 8909  | 4.20346643896   |
| NM_000384 | APOB | 4628  | 4689  | 2.32899732104   |
| NM_000384 | APOB | 2414  | 2459  | 3.20346643896   |
| NM_000384 | APOB | 13667 | 13709 | 2.7440345844    |
| NM_000384 | APOB | 8287  | 8333  | 0.744028089266  |
| NM_000384 | APOB | 7285  | 7337  | 2.91395982176   |
| NM_000384 | APOB | 12433 | 12484 | 2.74403482032   |
| NM_000384 | APOB | 9974  | 10014 | 2.32899731349   |
| NM_000384 | APOB | 942   | 1005  | 4.1363522431    |
| NM_000384 | APOB | 6833  | 6887  | 2.55138950646   |
| NM_000384 | APOB | 6638  | 6688  | 1.32882357072   |
| NM_000384 | APOB | 9679  | 9721  | 3.20346643896   |
| NM_000384 | APOB | 5691  | 5732  | 2.06596291521   |
| NM_000384 | APOB | 5860  | 5905  | 2.74403482032   |
| NM_000384 | APOB | 5807  | 5846  | -0.255965179687 |
| NM_000384 | APOB | 12757 | 12812 | 3.20346643896   |
| NM_000384 | APOB | 13339 | 13422 | 4.1363522431    |
| NM_000384 | APOB | 9430  | 9508  | 2.32899732104   |
| NM_000384 | APOB | 10898 | 10947 | 2.46725053299   |
| NM_000384 | APOB | 558   | 624   | 2.06596267929   |
| NM_000384 | APOB | 1633  | 1667  | 2.82982061238   |
| NM_000384 | APOB | 4892  | 4949  | 2.32899732082   |
| NM_000384 | APOB | 5917  | 5973  | 2.55138950646   |
| NM_000384 | APOB | 2613  | 2667  | 2.55138974238   |
| NM_000384 | APOB | 7830  | 7881  | 2.7440348201    |
| NM_000384 | APOB | 12551 | 12671 | 4.20346643896   |
| NM_000384 | APOB | 10520 | 10552 | 1.32899708512   |
| NM_000384 | APOB | 11874 | 11918 | 2.5473721422    |
| NM_000384 | APOB | 13617 | 13665 | 1.98182370582   |
| NM_000384 | APOB | 7682  | 7751  | 1.74403482032   |
| NM_000384 | APOB | 2461  | 2489  | 0.740017220146  |
| NM_000384 | APOB | 1868  | 2086  | 5.60201581545   |
| NM_000384 | APOB | 4952  | 5015  | 2.06596290766   |
| NM_000384 | APOB | 10465 | 10500 | 1.98182370582   |
| NM_000384 | APOB | 5534  | 5616  | 3.74403482032   |
| NM_000384 | APOB | 1475  | 1617  | 4.74403482032   |

|           |          |       |       |                    |
|-----------|----------|-------|-------|--------------------|
| NM_000384 | APOB     | 689   | 770   | 3.55138974238      |
| NM_000384 | APOB     | 1028  | 1065  | 1.32497972087      |
| NM_000384 | APOB     | 13728 | 13810 | 2.55121599206      |
| NM_000384 | APOB     | 7045  | 7088  | 1.7440345844       |
| NM_000384 | APOB     | 12688 | 12728 | 1.24485811166      |
| NM_000384 | APOB     | 3034  | 3060  | 0.743861070001     |
| NM_000384 | APOB     | 7198  | 7230  | 2.32882357072      |
| NM_000384 | APOB     | 162   | 254   | 2.06194531503      |
| NM_000384 | APOB     | 2671  | 2822  | 4.55138974238      |
| NM_000384 | APOB     | 4164  | 4210  | 2.46725053299      |
| NM_000384 | APOB     | 4045  | 4135  | 4.20346643896      |
| NM_000384 | APOB     | 6543  | 6577  | 1.74402808927      |
| NM_000384 | APOB     | 467   | 522   | 1.32497972087      |
| NM_000384 | APOB     | 8104  | 8242  | 3.99196233376      |
| NM_000384 | APOB     | 5325  | 5373  | 1.74386107         |
| NM_000384 | APOB     | 11006 | 11070 | -0.259982779854    |
| NM_000384 | APOB     | 11950 | 12039 | 3.44447453846      |
| NM_000384 | APOB     | 4489  | 4546  | 2.06578916489      |
| NM_000384 | APOB     | 6346  | 6428  | 2.74403482032      |
| NM_000384 | APOB     | 4721  | 4888  | 4.65092541593      |
| NM_000384 | APOB     | 10615 | 10674 | 2.55138301132      |
| NM_000384 | APOB     | 8585  | 8650  | 1.32899732082      |
| NM_000384 | APOB     | 6095  | 6199  | 4.87331783726      |
| NM_000384 | APOB     | 3100  | 3285  | 4.74403482032      |
| NM_000384 | APOB     | 3285  | 3443  | 4.26759677638      |
| NM_000384 | APOB     | 11648 | 11760 | 3.65092541593      |
| NM_000384 | APOB     | 2281  | 2412  | 2.74403482032      |
| NM_000384 | APOB     | 11275 | 11357 | 2.74403482032      |
| NM_000384 | APOB     | 2495  | 2608  | 2.91395982176      |
| NM_000384 | APOB     | 2144  | 2221  | 3.06596291521      |
| NM_000384 | APOB     | 11773 | 11840 | 3.32899732104      |
| NM_000384 | APOB     | 3546  | 3865  | 5.83149766157      |
| NM_000384 | APOB     | 10674 | 10745 | 1.98182370582      |
| NM_000384 | APOB     | 797   | 916   | 3.06596291521      |
| NM_000384 | APOB     | 9550  | 9622  | 3.32899732104      |
| NM_000384 | APOB     | 12245 | 12349 | 2.74403482032      |
| NM_201566 | SLC16A13 |       | 1312  | 1347 8.4804100186  |
| NM_201566 | SLC16A13 |       | 1150  | 1185 10.1495114928 |
| NM_004800 | TM9SF2   | 576   | 606   | 6.24325148562      |
| NM_004800 | TM9SF2   | 1063  | 1119  | 7.39525457907      |
| NM_004800 | TM9SF2   | 2057  | 2111  | 6.77376620232      |
| NM_004800 | TM9SF2   | 2201  | 2244  | 6.77376620232      |
| NM_004800 | TM9SF2   | 2260  | 2315  | 4.65427138473      |
| NM_004800 | TM9SF2   | 1479  | 1532  | 6.39525457885      |
| NM_004800 | TM9SF2   | 880   | 1060  | 8.82821398635      |
| NM_004800 | TM9SF2   | 1325  | 1479  | 8.82821398635      |
| NM_004800 | TM9SF2   | 1131  | 1295  | 8.07332648418      |
| NM_004800 | TM9SF2   | 673   | 786   | 7.88068140624      |
| NM_004800 | TM9SF2   | 1546  | 1606  | 6.53275810282      |
| NM_004800 | TM9SF2   | 336   | 450   | 7.71718267396      |

|              |         |      |      |                 |
|--------------|---------|------|------|-----------------|
| NM_004800    | TM9SF2  | 1965 | 2005 | 5.3912369789    |
| NM_004800    | TM9SF2  | 1651 | 1792 | 8.16078932543   |
| NM_004800    | TM9SF2  | 612  | 671  | 5.65828874898   |
| NM_006405    | TM9SF1  | 1311 | 1340 | 7.462719313     |
| NM_006405    | TM9SF1  | 2086 | 2137 | 6.45870171305   |
| NM_006405    | TM9SF1  | 1444 | 1517 | 5.45870171305   |
| NM_006405    | TM9SF1  | 1150 | 1226 | 8.46271931323   |
| NM_006405    | TM9SF1  | 797  | 837  | 6.37858010384   |
| NM_006405    | TM9SF1  | 516  | 567  | 6.96354260456   |
| NM_006405    | TM9SF1  | 1017 | 1084 | 6.46271931322   |
| NM_003164    | STX5    | 107  | 136  | 6.53545572414   |
| NM_006406    | PRDX4   | 752  | 806  | 4.21666951812   |
| NM_006406    | PRDX4   | 469  | 499  | 4.21649577535   |
| NM_006406    | PRDX4   | 583  | 631  | 5.21666952567   |
| NM_006406    | PRDX4   | 683  | 722  | 7.3865945271    |
| NM_006406    | PRDX4   | 302  | 364  | 7.21666952544   |
| NM_006406    | PRDX4   | 532  | 555  | 4.13253031628   |
| NM_006401    | ANP32B  | 864  | 907  | 4.20972384306   |
| NM_006408    | AGR2    | 505  | 551  | 8.55328117897   |
| NM_006408    | AGR2    | 565  | 672  | 11.3646537012   |
| NM_006408    | AGR2    | 688  | 815  | 11.1422612799   |
| NM_032246    | MEX3B   | 479  | 511  | 10.9480446785   |
| NM_032242    | PLXNA1  | 812  | 866  | 8.4868749817    |
| NM_001010888 | ZC3H12B | 4562 | 4584 | 12.5196046516   |
| NM_001003791 | ERLIN2  | 330  | 374  | 10.9398059088   |
| NM_133367    | PAQR8   | 576  | 629  | 8.79815880879   |
| NM_133367    | PAQR8   | 1011 | 1065 | 7.71419334972   |
| NM_000259    | MY05A   | 102  | 121  | 9.5522566911    |
| NM_002568    | PABPC1  | 1747 | 1778 | 0.883051474697  |
| NM_002568    | PABPC1  | 1285 | 1352 | -0.438709600926 |
| NM_002568    | PABPC1  | 670  | 714  | 1.36847830187   |
| NM_000701    | ATP1A1  | 2317 | 2392 | 5.40465554247   |
| NM_000701    | ATP1A1  | 1708 | 1797 | 5.9192287153    |
| NM_000701    | ATP1A1  | 2856 | 2930 | 4.81969304175   |
| NM_000701    | ATP1A1  | 3360 | 3404 | 4.01233811969   |
| NM_000701    | ATP1A1  | 1558 | 1629 | 4.71277783783   |
| NM_000701    | ATP1A1  | 692  | 755  | 2.01233811214   |
| NM_000701    | ATP1A1  | 2723 | 2804 | 5.40465554247   |
| NM_000701    | ATP1A1  | 602  | 691  | 5.59730062041   |
| NM_000701    | ATP1A1  | 2217 | 2285 | 4.59730062041   |
| NM_000701    | ATP1A1  | 3643 | 3698 | 3.01233138864   |
| NM_000701    | ATP1A1  | 1662 | 1698 | 3.01233138864   |
| NM_000701    | ATP1A1  | 2937 | 3098 | 7.03470593272   |
| NM_000701    | ATP1A1  | 2404 | 2663 | 7.76722562186   |
| NM_000701    | ATP1A1  | 2805 | 2842 | 3.59730062041   |
| NM_000701    | ATP1A1  | 3166 | 3360 | 6.89498116905   |
| NM_000701    | ATP1A1  | 469  | 577  | 5.40465554247   |
| NM_000701    | ATP1A1  | 1406 | 1520 | 6.59730062041   |
| NM_000701    | ATP1A1  | 3101 | 3165 | 4.01233811969   |
| NM_000701    | ATP1A1  | 3520 | 3606 | 4.71277783783   |

|              |          |      |      |                    |
|--------------|----------|------|------|--------------------|
| NM_000701    | ATP1A1   | 3409 | 3517 | 5.09980096094      |
| NM_000701    | ATP1A1   | 49   | 159  | 4.9192287153       |
| NM_000701    | ATP1A1   | 1080 | 1404 | 7.5514969308       |
| NM_000701    | ATP1A1   | 1801 | 2183 | 7.5514969308       |
| NM_000701    | ATP1A1   | 878  | 1072 | 6.56692697137      |
| NM_000701    | ATP1A1   | 201  | 458  | 5.26026563314      |
| NM_005698    | SCAMP3   | 993  | 1038 | 7.61404925745      |
| NM_005698    | SCAMP3   | 938  | 981  | 9.35102157512      |
| NM_005698    | SCAMP3   | 707  | 782  | 9.02909348756      |
| NM_005697    | SCAMP2   | 611  | 664  | 7.72849401304      |
| NM_001122752 | SERPINI1 |      | 1278 | 1308 8.11928740516 |
| NM_001142364 | ALG5     | 543  | 578  | 4.46006957032      |
| NM_001142364 | ALG5     | 892  | 940  | 8.12917128042      |
| NM_001142364 | ALG5     | 355  | 404  | 6.54019117953      |
| NM_001142364 | ALG5     | 700  | 775  | 6.86613686704      |
| NM_014905    | GLS      | 1504 | 1539 | 4.63839382512      |
| NM_005035    | POLRMT   | 2150 | 2219 | 7.51616073068      |
| NM_017847    | C1orf27  | 897  | 932  | 7.70686840414      |
| NM_017847    | C1orf27  | 1163 | 1223 | 9.44384072936      |
| NM_017847    | C1orf27  | 852  | 882  | 6.1178950343       |
| NM_001861    | COX4I1   | 589  | 678  | 1.79348856734      |
| NM_001867    | COX7C    | 187  | 240  | 5.01778032824      |
| NM_001865    | COX7A2   | 194  | 239  | 4.34719967463      |
| NM_004327    | BCR      | 207  | 251  | 6.16517945579      |
| NM_004323    | BAG1     | 2439 | 2459 | 4.43103675267      |
| NM_025250    | TTYH3    | 748  | 854  | 8.42261370999      |
| NM_025250    | TTYH3    | 1266 | 1320 | 7.28510345519      |
| NM_025250    | TTYH3    | 1112 | 1193 | 8.54814459208      |
| NM_025250    | TTYH3    | 1581 | 1653 | 7.96318208381      |
| NM_025250    | TTYH3    | 3792 | 3869 | 8.28511018624      |
| NM_025250    | TTYH3    | 3114 | 3162 | 5.96300834104      |
| NM_025250    | TTYH3    | 1432 | 1490 | 4.96318185544      |
| NM_025250    | TTYH3    | 2017 | 2066 | 5.96300834104      |
| NM_025250    | TTYH3    | 2560 | 2620 | 7.54814459208      |
| NM_025250    | TTYH3    | 1038 | 1073 | 6.96318208381      |
| NM_025250    | TTYH3    | 4504 | 4571 | 4.96300834104      |
| NM_025250    | TTYH3    | 3288 | 3316 | 5.87904288197      |
| NM_025250    | TTYH3    | 1922 | 1965 | 6.46400538269      |
| NM_025250    | TTYH3    | 372  | 460  | 8.1331070928       |
| NM_025250    | TTYH3    | 226  | 336  | 7.96318208381      |
| NM_025250    | TTYH3    | 943  | 1030 | 8.6636218095       |
| NM_025250    | TTYH3    | 634  | 727  | 5.96318209114      |
| NM_004328    | BCS1L    | 709  | 746  | 8.03234247415      |
| NM_001146333 | SUMF2    | 647  | 681  | 8.45498257357      |
| NM_001146333 | SUMF2    | 589  | 646  | 10.1921219181      |
| NM_001146333 | SUMF2    | 98   | 153  | 7.87018709211      |
| NM_001146333 | SUMF2    | 359  | 419  | 9.67754874522      |
| NM_001146333 | SUMF2    | 175  | 354  | 11.6775487452      |
| NM_003247    | THBS2    | 2513 | 2560 | 16.4661043964      |
| NM_016468    | COX16    | 162  | 239  | 7.84653791739      |

|              |              |      |     |                |
|--------------|--------------|------|-----|----------------|
| NM_001164468 | TMED7-TICAM2 | 220  | 296 | 6.26532163726  |
| NM_001164468 | TMED7-TICAM2 | 845  | 875 | 8.591093582    |
| NM_001164465 | GOLGA6L10    | 117  | 136 | 7.878404358    |
| NM_031450    | C11orf68     | 30   | 68  | 8.63075173677  |
| NM_031453    | FAM107B 2058 | 2080 |     | 5.30544995845  |
| NM_002952    | RPS2 404     | 450  |     | 0.955648624745 |
| NM_002952    | RPS2 761     | 808  |     | 1.69278796922  |
| NM_002952    | RPS2 665     | 708  |     | 0.955648624745 |
| NM_002951    | RPN2 1823    | 1867 |     | 4.84695605392  |
| NM_002951    | RPN2 1932    | 2012 |     | 5.97623907086  |
| NM_002951    | RPN2 2125    | 2165 |     | 2.34777934526  |
| NM_002951    | RPN2 1369    | 1426 |     | 3.65431097598  |
| NM_002951    | RPN2 593     | 644  |     | 2.42790095447  |
| NM_002951    | RPN2 461     | 501  |     | 4.01688104781  |
| NM_002951    | RPN2 1756    | 1822 |     | 2.43191855464  |
| NM_002951    | RPN2 1433    | 1475 |     | 3.65413722566  |
| NM_002951    | RPN2 2388    | 2459 |     | 0.842938453745 |
| NM_002951    | RPN2 164     | 211  |     | 0.842938453745 |
| NM_002951    | RPN2 1107    | 1226 |     | 5.75384664953  |
| NM_002951    | RPN2 1017    | 1103 |     | 4.30638767256  |
| NM_002951    | RPN2 1551    | 1746 |     | 6.27322080862  |
| NM_002951    | RPN2 2035    | 2125 |     | 3.43191855464  |
| NM_002951    | RPN2 821     | 1011 |     | 5.97623907086  |
| NM_002951    | RPN2 90      | 161  |     | 3.16888391289  |
| NM_002951    | RPN2 1254    | 1319 |     | 1.8467823036   |
| NM_002950    | RPN1 1257    | 1311 |     | 6.16511839925  |
| NM_002950    | RPN1 1434    | 1480 |     | 6.16511839925  |
| NM_002950    | RPN1 764     | 841  |     | 5.51304170267  |
| NM_002950    | RPN1 629     | 693  |     | 6.79314962187  |
| NM_002950    | RPN1 986     | 1018 |     | 4.29064928133  |
| NM_002950    | RPN1 950     | 979  |     | 5.02760814445  |
| NM_002950    | RPN1 76      | 216  |     | 6.40612649876  |
| NM_002950    | RPN1 292     | 383  |     | 6.29064928134  |
| NM_002950    | RPN1 458     | 519  |     | 4.28663168116  |
| NM_002950    | RPN1 1621    | 1658 |     | 5.02761463958  |
| NM_002950    | RPN1 1107    | 1237 |     | 8.0276148755   |
| NM_002950    | RPN1 1023    | 1083 |     | 4.29047553102  |
| NM_002950    | RPN1 1314    | 1387 |     | 5.29064928111  |
| NM_002950    | RPN1 1669    | 1806 |     | 7.70568678062  |
| NM_024612    | DHX40 1968   | 1987 |     | 5.47682003417  |
| NM_024345    | DCAF10 349   | 389  |     | 8.95199004786  |
| NM_054024    | MIA2 1891    | 1917 |     | 5.60289530766  |
| NM_006090    | CEPT1 840    | 877  |     | 8.42153224903  |
| NM_006090    | CEPT1 784    | 818  |     | 7.50165385824  |
| NM_078473    | TM2D2 563    | 641  |     | 9.89545937505  |
| NM_014730    | MLEC 576     | 642  |     | 7.08426339119  |
| NM_014732    | KIAA0513     | 761  | 797 | 10.4794033233  |
| NM_032189    | ATP11A 4645  | 4695 |     | 7.56415028616  |
| NM_032189    | ATP11A 3066  | 3110 |     | 6.42589707399  |
| NM_032189    | ATP11A 1117  | 1156 |     | 7.42187947404  |

|              |          |      |      |                   |
|--------------|----------|------|------|-------------------|
| NM_032189    | ATP11A   | 2970 | 3027 | 7.42572332389     |
| NM_032189    | ATP11A   | 1209 | 1275 | 7.16286266838     |
| NM_032189    | ATP11A   | 3644 | 3708 | 5.83691697332     |
| NM_032189    | ATP11A   | 1537 | 1594 | 7.64828949555     |
| NM_032189    | ATP11A   | 60   | 164  | 6.84093457349     |
| NM_014225    | PPP2R1A  | 767  | 850  | 6.28198341611     |
| NM_014229    | SLC6A11  | 735  | 772  | 8.73892129163     |
| NM_014229    | SLC6A11  | 797  | 846  | 7.65879968242     |
| NM_001077498 | C17orf63 |      | 100  | 120 7.47077556685 |
| NM_198181    | GOLGA6L9 |      | 117  | 136 7.37364447923 |
| NM_015172    | PRRC2C   | 1618 | 1674 | 5.70408019031     |
| NM_015177    | DTX4     | 132  | 155  | 11.5548458789     |
| NM_001177387 | ATXN7    | 149  | 175  | 9.3572815977      |
| NM_001177387 | ATXN7    | 1124 | 1143 | 9.94224409842     |
| NM_019059    | TOMM7    | 241  | 322  | 2.1025897192      |
| NM_019050    | USP53    | 140  | 161  | 8.1589482484      |
| NM_001456    | FLNA     | 2617 | 2670 | 6.52048223763     |
| NM_001456    | FLNA     | 4216 | 4262 | 7.09004826664     |
| NM_001456    | FLNA     | 448  | 503  | 6.86748210253     |
| NM_001456    | FLNA     | 2370 | 2435 | 6.27867575196     |
| NM_001456    | FLNA     | 4155 | 4193 | 6.27867575196     |
| NM_004134    | HSPA9    | 1497 | 1531 | 3.18773731889     |
| NM_004134    | HSPA9    | 785  | 860  | 3.59379789211     |
| NM_007114    | TMF1     | 2008 | 2029 | 5.40547584434     |
| NM_007118    | TRIO     | 2275 | 2314 | 8.22775760096     |
| NM_014053    | FLVCR1   | 498  | 546  | 10.7552287977     |
| NM_014053    | FLVCR1   | 1285 | 1363 | 11.3442088986     |
| NM_001142864 | PIEZ01   | 1522 | 1596 | 9.74139456582     |
| NM_001142864 | PIEZ01   | 7215 | 7263 | 9.00827282151     |
| NM_001142864 | PIEZ01   | 3199 | 3261 | 10.0084398408     |
| NM_001142864 | PIEZ01   | 2345 | 2405 | 7.42331032079     |
| NM_001142864 | PIEZ01   | 1417 | 1494 | 9.74541193008     |
| NM_001142864 | PIEZ01   | 1993 | 2056 | 8.42348407089     |
| NM_001142864 | PIEZ01   | 282  | 342  | 8.41946647093     |
| NM_000146    | FTL      | 712  | 780  | 3.08906672649     |
| NM_000146    | FTL      | 186  | 234  | 1.50026037591     |
| NM_000146    | FTL      | 121  | 165  | 4.31163289814     |
| NM_000146    | FTL      | 66   | 102  | 1.4201387667      |
| NM_000146    | FTL      | 263  | 346  | 2.0892404768      |
| NM_000146    | FTL      | 562  | 613  | 3.08924047658     |
| NM_000147    | FUCA1    | 1216 | 1274 | 7.65389283946     |
| NM_000147    | FUCA1    | 537  | 590  | 5.73785829852     |
| NM_001142641 | FBRSL1   | 2541 | 2569 | 8.72474213708     |
| NM_173054    | RELN     | 126  | 159  | 7.45999761057     |
| NM_173054    | RELN     | 7111 | 7144 | 5.23759845818     |
| NM_173054    | RELN     | 8316 | 8393 | 6.23760495332     |
| NM_173054    | RELN     | 8760 | 8839 | 6.6526424526      |
| NM_173054    | RELN     | 5999 | 6037 | 5.56850347913     |
| NM_173054    | RELN     | 4426 | 4466 | 5.64862508834     |
| NM_173054    | RELN     | 8426 | 8463 | 5.23358758906     |

|              |         |       |       |               |
|--------------|---------|-------|-------|---------------|
| NM_173054    | RELN    | 6398  | 6445  | 5.23760518169 |
| NM_173054    | RELN    | 1973  | 2034  | 6.65264268852 |
| NM_173054    | RELN    | 10032 | 10060 | 5.15346597985 |
| NM_173054    | RELN    | 2705  | 2746  | 5.23760495332 |
| NM_173054    | RELN    | 826   | 853   | 3.64862508834 |
| NM_173054    | RELN    | 9077  | 9140  | 6.23760518923 |
| NM_173054    | RELN    | 1711  | 1752  | 5.23358758906 |
| NM_173054    | RELN    | 1556  | 1588  | 6.73842848057 |
| NM_173054    | RELN    | 5450  | 5529  | 7.35308240666 |
| NM_173054    | RELN    | 5391  | 5446  | 5.23358758906 |
| NM_173054    | RELN    | 4769  | 4815  | 3.56850347913 |
| NM_173054    | RELN    | 5044  | 5087  | 5.23760518923 |
| NM_173054    | RELN    | 9453  | 9523  | 5.15346597985 |
| NM_173054    | RELN    | 9251  | 9305  | 6.45982386026 |
| NM_173054    | RELN    | 4026  | 4061  | 6.82256768241 |
| NM_173054    | RELN    | 1016  | 1052  | 5.23760518169 |
| NM_173054    | RELN    | 2189  | 2224  | 5.23743143892 |
| NM_173054    | RELN    | 7723  | 7784  | 5.23743143892 |
| NM_173054    | RELN    | 2838  | 2866  | 4.56850347913 |
| NM_173054    | RELN    | 1416  | 1475  | 7.11207407123 |
| NM_173054    | RELN    | 3500  | 3536  | 5.64862508834 |
| NM_173054    | RELN    | 2476  | 2547  | 6.23760518924 |
| NM_173054    | RELN    | 6224  | 6312  | 4.65263595746 |
| NM_001174126 | SLC11A2 | 1542  | 1587  | 8.20456209372 |
| NM_001174126 | SLC11A2 | 1176  | 1248  | 7.46777024965 |
| NM_001174126 | SLC11A2 | 412   | 475   | 8.20473583649 |
| NM_001174126 | SLC11A2 | 855   | 943   | 6.88280774915 |
| NM_001102371 | FOXRED2 | 4889  | 4912  | 8.11596415745 |
| NM_004864    | GDF15   | 788   | 849   | 8.3906858927  |
| NM_004864    | GDF15   | 621   | 744   | 10.0021206048 |
| NM_004864    | GDF15   | 1104  | 1199  | 9.26515501062 |
| NM_004864    | GDF15   | 12    | 599   | 11.8206737334 |
| NM_004864    | GDF15   | 893   | 1031  | 9.3500439082  |
| NM_020183    | ARNTL2  | 5297  | 5321  | 10.8789436502 |
| NM_198402    | PTPLB   | 560   | 603   | 11.0930682196 |
| NM_001007561 | IRGQ    | 1398  | 1446  | 11.9661783713 |
| NM_006429    | CCT7    | 1581  | 1621  | 1.50371987262 |
| NM_006423    | RABAC1  | 590   | 644   | 9.54406374045 |
| NM_006423    | RABAC1  | 509   | 568   | 7.21811804539 |
| NM_003145    | SSR2    | 221   | 301   | 7.75675507751 |
| NM_003145    | SSR2    | 162   | 210   | 6.25425473698 |
| NM_003145    | SSR2    | 302   | 391   | 6.66929223626 |
| NM_003145    | SSR2    | 397   | 593   | 7.9172197497  |
| NM_003145    | SSR2    | 1008  | 1072  | 4.6692855052  |
| NM_003144    | SSR1    | 1070  | 1090  | 1.99459054    |
| NM_003144    | SSR1    | 155   | 205   | 3.320529504   |
| NM_003144    | SSR1    | 936   | 972   | 3.80578931191 |
| NM_003144    | SSR1    | 1019  | 1050  | 1.99459054    |
| NM_003144    | SSR1    | 778   | 884   | 4.90549873578 |
| NM_003144    | SSR1    | 555   | 743   | 5.90549873578 |



|              |         |       |       |               |
|--------------|---------|-------|-------|---------------|
| NM_003144    | SSR1    | 280   | 436   | 5.99860814017 |
| NM_005222    | DLX6    | 1024  | 1045  | 8.07607166477 |
| NM_001040455 | SIDT2   | 2600  | 2620  | 7.54778235142 |
| NM_001040456 | RHBDD2  | 392   | 451   | 10.5268974409 |
| NM_001762    | CCT6A   | 1726  | 1759  | 1.88066740951 |
| NM_001762    | CCT6A   | 233   | 304   | 2.88468477377 |
| NM_001762    | CCT6A   | 1124  | 1224  | 3.46964751041 |
| NM_004925    | AQP3    | 612   | 641   | 9.92447621632 |
| NM_014033    | METTL7A | 603   | 648   | 5.04263580271 |
| NM_014033    | METTL7A | 508   | 546   | 6.04280931711 |
| NM_014033    | METTL7A | 345   | 377   | 5.04280954548 |
| NM_014033    | METTL7A | 659   | 913   | 9.32821177189 |
| NM_014030    | GIT1    | 1236  | 1254  | 6.34167364177 |
| NM_001145966 | MKI67   | 8571  | 8610  | 6.03910745481 |
| NM_001145966 | MKI67   | 3659  | 3678  | 5.5342665633  |
| NM_001145966 | MKI67   | 5349  | 5389  | 5.5342665633  |
| NM_001145966 | MKI67   | 1982  | 2029  | 5.45414495409 |
| NM_002541    | OGDH    | 1046  | 1118  | 8.96810379488 |
| NM_018046    | AGGF1   | 1468  | 1487  | 6.30233142371 |
| NM_001025205 | AP2M1   | 951   | 996   | 4.60364495083 |
| NM_001025205 | AP2M1   | 109   | 165   | 5.09880405932 |
| NM_014698    | TMEM63A | 1541  | 1631  | 7.78348507556 |
| NM_001163315 | FBXL17  | 1065  | 1100  | 6.44671968868 |
| NM_001099415 | POM121C | 4652  | 4716  | 8.68685232907 |
| NM_012343    | NNT     | 2110  | 2164  | 8.81060222139 |
| NM_014963    | SBN02   | 3146  | 3166  | 8.38091089799 |
| NM_005013    | NUCB2   | 1091  | 1162  | 5.74796706693 |
| NM_005013    | NUCB2   | 715   | 752   | 2.85647966654 |
| NM_176812    | CHMP4B  | 175   | 209   | 2.26014912388 |
| NM_001846    | COL4A2  | 3004  | 3025  | 14.4274195528 |
| NM_201379    | PLEC    | 13397 | 13444 | 7.02424084381 |
| NM_201379    | PLEC    | 1969  | 2042  | 9.9157282442  |
| NM_206873    | PPP1CA  | 426   | 531   | 6.24870838531 |
| NM_153816    | SNX14   | 193   | 266   | 6.05920102932 |
| NM_153816    | SNX14   | 2569  | 2615  | 6.05903401006 |
| NM_153816    | SNX14   | 1002  | 1057  | 6.0551901602  |
| NM_153816    | SNX14   | 1994  | 2038  | 5.47424525211 |
| NM_004599    | SREBF2  | 2426  | 2477  | 6.9476659066  |
| NM_004599    | SREBF2  | 1814  | 1863  | 6.94365503748 |
| NM_004599    | SREBF2  | 2720  | 2764  | 6.62573781171 |
| NM_004599    | SREBF2  | 2810  | 2849  | 6.21070680757 |
| NM_004599    | SREBF2  | 2325  | 2369  | 7.4330992289  |
| NM_001152    | SLC25A5 | 742   | 788   | 2.27677999436 |
| NM_001153    | ANXA4   | 1130  | 1178  | 3.4591728366  |
| NM_001153    | ANXA4   | 627   | 651   | 5.8612225407  |
| NM_001150    | ANPEP   | 1562  | 1613  | 3.38438038493 |
| NM_025232    | REEP4   | 1178  | 1231  | 11.6074638909 |
| NM_025232    | REEP4   | 554   | 592   | 11.1884087914 |
| NM_001143839 | PDE2A   | 1453  | 1474  | 13.5498551621 |
| NM_001143839 | PDE2A   | 158   | 179   | 12.8847710521 |

|              |          |      |      |                   |
|--------------|----------|------|------|-------------------|
| NM_016195    | KIF20B   | 1225 | 1252 | 6.36070819018     |
| NM_017820    | EXD3     | 115  | 134  | 11.9622725037     |
| NM_020062    | SLC2A4RG |      | 270  | 295 6.33587027811 |
| NM_016333    | SRRM2    | 7376 | 7410 | 3.90796378151     |
| NM_016333    | SRRM2    | 1329 | 1396 | 5.79945767704     |
| NM_016333    | SRRM2    | 2658 | 2682 | 4.90796378151     |
| NM_016333    | SRRM2    | 5116 | 5172 | 4.99210299068     |
| NM_016333    | SRRM2    | 5670 | 5733 | 6.5768917413      |
| NM_016333    | SRRM2    | 1126 | 1191 | 4.49292628224     |
| NM_016333    | SRRM2    | 6345 | 6410 | 5.57304789145     |
| NM_016333    | SRRM2    | 5960 | 6006 | 5.49292628224     |
| NM_016441    | CRIM1    | 998  | 1051 | 7.16012458196     |
| NM_016442    | ERAP1    | 1380 | 1413 | 6.96240320004     |
| NM_016442    | ERAP1    | 1180 | 1223 | 6.46157317765     |
| NM_016442    | ERAP1    | 1001 | 1061 | 7.46157990115     |
| NM_016442    | ERAP1    | 2453 | 2527 | 8.4615799087      |
| NM_198892    | BMP2K    | 192  | 218  | 7.80824503331     |
| NM_016147    | PPME1    | 352  | 371  | 5.61872638941     |
| NM_003262    | SEC62    | 1230 | 1254 | 2.72542570658     |
| NM_003262    | SEC62    | 903  | 1039 | 5.61691983802     |
| NM_003262    | SEC62    | 1152 | 1183 | 4.3103882073      |
| NM_003262    | SEC62    | 1045 | 1124 | 5.80939116565     |
| NM_003262    | SEC62    | 829  | 891  | 4.39452741668     |
| NM_175737    | KLB      | 622  | 665  | 7.96787727155     |
| NM_001145201 | PRAP1    | 318  | 350  | 8.7505886732      |
| NM_001145201 | PRAP1    | 250  | 303  | 10.9245312748     |
| NM_005228    | EGFR     | 1540 | 1591 | 8.10378337547     |
| NM_005228    | EGFR     | 1938 | 1991 | 8.91113806161     |
| NM_005228    | EGFR     | 1459 | 1518 | 8.42571147014     |
| NM_005228    | EGFR     | 3318 | 3365 | 8.68873914514     |
| NM_005228    | EGFR     | 2613 | 2651 | 7.60460666681     |
| NM_005228    | EGFR     | 2696 | 2760 | 9.10378337547     |
| NM_005228    | EGFR     | 2118 | 2166 | 8.10378337547     |
| NM_005228    | EGFR     | 626  | 669  | 8.42571147035     |
| NM_005228    | EGFR     | 108  | 158  | 7.0997657753      |
| NM_005228    | EGFR     | 3078 | 3109 | 6.10378337525     |
| NM_005228    | EGFR     | 3236 | 3294 | 8.91113829753     |
| NM_005228    | EGFR     | 1804 | 1910 | 10.3517108889     |
| NM_005228    | EGFR     | 1025 | 1092 | 6.0997657753      |
| NM_005228    | EGFR     | 1137 | 1238 | 7.10378313955     |
| NM_005228    | EGFR     | 2348 | 2416 | 8.42571147035     |
| NM_005224    | ARID3A   | 2458 | 2508 | 4.98966932414     |
| NM_001171991 | HCCS     | 65   | 95   | 5.77224458205     |
| NM_001164619 | GPC3     | 1089 | 1146 | 3.13641712485     |
| NM_001164619 | GPC3     | 1741 | 1806 | 2.28842021829     |
| NM_001164619 | GPC3     | 311  | 363  | 2.46899246394     |
| NM_001164619 | GPC3     | 1275 | 1364 | 3.46899246394     |
| NM_001164619 | GPC3     | 369  | 407  | -0.622487977488   |
| NM_001164619 | GPC3     | 1370 | 1409 | 1.8409612411      |
| NM_001164619 | GPC3     | 2036 | 2083 | 0.619318508188    |

|              |        |      |      |                |
|--------------|--------|------|------|----------------|
| NM_001164619 | GPC3   | 135  | 220  | 2.55145462413  |
| NM_001164619 | GPC3   | 1418 | 1732 | 5.5614387127   |
| NM_001164619 | GPC3   | 235  | 295  | 0.381522891631 |
| NM_001164619 | GPC3   | 699  | 1011 | 5.88137550977  |
| NM_001164619 | GPC3   | 566  | 677  | 3.7390816273   |
| NM_001164619 | GPC3   | 424  | 561  | 2.70345771757  |
| NM_001164619 | GPC3   | 1150 | 1225 | 1.70345771757  |
| NM_001204401 | XIAP   | 6972 | 6997 | 7.49083585868  |
| NM_032704    | TUBA1C | 277  | 320  | 5.57477552544  |
| NM_032704    | TUBA1C | 895  | 939  | 3.5749492682   |
| NM_032704    | TUBA1C | 1239 | 1290 | 5.15973802616  |
| NM_032704    | TUBA1C | 482  | 517  | 4.57477552544  |
| NM_032704    | TUBA1C | 659  | 705  | 3.57093167558  |
| NM_032704    | TUBA1C | 549  | 585  | 5.07577256709  |
| NM_032704    | TUBA1C | 781  | 852  | 6.15991177647  |
| NM_032704    | TUBA1C | 423  | 481  | 5.15991177625  |
| NM_015154    | MESDC2 | 583  | 634  | 7.01571323064  |
| NM_015154    | MESDC2 | 515  | 542  | 4.42673312974  |
| NM_015154    | MESDC2 | 245  | 313  | 6.23810564443  |
| NM_020899    | ZBTB4  | 2154 | 2173 | 10.3773396542  |
| NM_001305    | CLDN4  | 591  | 645  | 11.9120915079  |
| NM_001305    | CLDN4  | 916  | 950  | 10.0011833122  |
| NM_001305    | CLDN4  | 959  | 1026 | 9.00118331215  |
| NM_001304    | CPD    | 2609 | 2648 | 7.10269348858  |
| NM_001304    | CPD    | 3596 | 3648 | 9.27261849757  |
| NM_001304    | CPD    | 1068 | 1122 | 8.10269349613  |
| NM_001304    | CPD    | 3690 | 3743 | 7.01855428675  |
| NM_001304    | CPD    | 1355 | 1398 | 6.60351678747  |
| NM_001304    | CPD    | 572  | 654  | 8.91004841819  |
| NM_001304    | CPD    | 3400 | 3427 | 6.60351678747  |
| NM_001304    | CPD    | 1037 | 1065 | 6.60351678747  |
| NM_001304    | CPD    | 3178 | 3223 | 7.91004841818  |
| NM_001304    | CPD    | 2265 | 2313 | 6.6876559893   |
| NM_001304    | CPD    | 3935 | 3976 | 7.09867589596  |
| NM_001304    | CPD    | 160  | 215  | 6.68363839668  |
| NM_001304    | CPD    | 113  | 152  | 7.42461485996  |
| NM_001304    | CPD    | 3132 | 3155 | 5.01855428675  |
| NM_001304    | CPD    | 2103 | 2136 | 6.6876492658   |
| NM_001304    | CPD    | 1743 | 1839 | 8.42462159102  |
| NM_001304    | CPD    | 2535 | 2574 | 7.4244478407   |
| NM_001304    | CPD    | 2961 | 3116 | 9.19015633738  |
| NM_001304    | CPD    | 2319 | 2402 | 8.80313321427  |
| NM_001304    | CPD    | 729  | 833  | 8.68765599685  |
| NM_001308    | CPN1   | 1159 | 1195 | 8.13287241096  |
| NM_030627    | CPEB4  | 79   | 107  | 7.92987182671  |
| NM_001174105 | CD14   | 864  | 916  | 12.7534403702  |
| NM_000308    | CTSA   | 1606 | 1649 | 6.33234701831  |
| NM_000308    | CTSA   | 1828 | 1872 | 6.65025752057  |
| NM_000308    | CTSA   | 2143 | 2220 | 6.65427512074  |
| NM_000308    | CTSA   | 1173 | 1201 | 6.65426838969  |

|              |       |      |      |               |
|--------------|-------|------|------|---------------|
| NM_000308    | CTSA  | 1290 | 1329 | 6.65427512074 |
| NM_000308    | CTSA  | 1481 | 1592 | 9.032786744   |
| NM_000308    | CTSA  | 1968 | 2019 | 5.24820781647 |
| NM_000308    | CTSA  | 1016 | 1093 | 8.13970194791 |
| NM_000308    | CTSA  | 615  | 705  | 7.91730952658 |
| NM_000302    | PLOD1 | 2541 | 2585 | 5.46324394687 |
| NM_000302    | PLOD1 | 944  | 996  | 4.72644537197 |
| NM_000302    | PLOD1 | 1395 | 1456 | 4.72645186711 |
| NM_000302    | PLOD1 | 1861 | 1912 | 5.05735039292 |
| NM_000302    | PLOD1 | 1246 | 1315 | 5.46341746127 |
| NM_001042532 | COASY | 1705 | 1803 | 6.21490301984 |
| NM_001042535 | AGAP3 | 414  | 440  | 8.19823316338 |
| NM_004514    | FOXK2 | 522  | 550  | 6.1791272354  |
| NM_000169    | GLA   | 665  | 719  | 9.34517582779 |
| NM_000169    | GLA   | 183  | 208  | 5.88557046638 |
| NM_000169    | GLA   | 372  | 404  | 8.47070671742 |
| NM_000169    | GLA   | 317  | 362  | 6.80160500732 |
| NM_000169    | GLA   | 568  | 609  | 7.88574420915 |
| NM_000169    | GLA   | 1102 | 1201 | 8.47070671742 |
| NM_000169    | GLA   | 782  | 900  | 8.69309913876 |
| NM_020300    | MGST1 | 397  | 543  | 7.16868446926 |
| NM_020300    | MGST1 | 213  | 335  | 8.09068195726 |
| NM_013255    | MKLN1 | 0    | 22   | 7.18039329562 |
| NM_002210    | ITGAV | 1034 | 1067 | 5.52268839031 |
| NM_002210    | ITGAV | 2630 | 2685 | 7.84461648542 |
| NM_002210    | ITGAV | 1247 | 1316 | 7.33004331259 |
| NM_002210    | ITGAV | 2139 | 2175 | 7.33004331259 |
| NM_002210    | ITGAV | 2793 | 2839 | 6.1076441602  |
| NM_002210    | ITGAV | 1089 | 1129 | 6.1076441602  |
| NM_002210    | ITGAV | 534  | 558  | 5.52251464021 |
| NM_002210    | ITGAV | 733  | 791  | 7.84461648542 |
| NM_002210    | ITGAV | 3047 | 3098 | 6.84461648542 |
| NM_002210    | ITGAV | 898  | 951  | 6.84461648519 |
| NM_002210    | ITGAV | 972  | 1006 | 6.43854918115 |
| NM_002210    | ITGAV | 803  | 842  | 6.10747714093 |
| NM_002210    | ITGAV | 1938 | 1986 | 6.43854918115 |
| NM_002210    | ITGAV | 1493 | 1524 | 6.10363329108 |
| NM_002210    | ITGAV | 1613 | 1656 | 5.51867079036 |
| NM_002210    | ITGAV | 1839 | 1868 | 7.32602571241 |
| NM_002210    | ITGAV | 331  | 405  | 8.42957898614 |
| NM_002210    | ITGAV | 3283 | 3330 | 6.10747714093 |
| NM_002211    | ITGB1 | 2088 | 2150 | 6.5068353586  |
| NM_002211    | ITGB1 | 990  | 1053 | 5.31419028066 |
| NM_002211    | ITGB1 | 660  | 704  | 5.09179785932 |
| NM_002211    | ITGB1 | 2419 | 2451 | 5.96626697724 |
| NM_002211    | ITGB1 | 938  | 963  | 4.08778025915 |
| NM_002211    | ITGB1 | 1405 | 1447 | 5.09179785932 |
| NM_002211    | ITGB1 | 1894 | 1967 | 6.82876345349 |
| NM_002211    | ITGB1 | 1783 | 1845 | 6.41372595421 |
| NM_002211    | ITGB1 | 706  | 811  | 7.15069154838 |

|              |         |      |      |                |
|--------------|---------|------|------|----------------|
| NM_002211    | ITGB1   | 621  | 655  | 4.82474585332  |
| NM_002211    | ITGB1   | 1167 | 1204 | 2.50682862755  |
| NM_002211    | ITGB1   | 2286 | 2398 | 7.31419028066  |
| NM_002211    | ITGB1   | 1599 | 1640 | 4.08778025915  |
| NM_002211    | ITGB1   | 2570 | 2611 | 4.09179785932  |
| NM_002211    | ITGB1   | 824  | 886  | 5.091624109    |
| NM_002211    | ITGB1   | 1652 | 1729 | 7.41372595421  |
| NM_002211    | ITGB1   | 1984 | 2083 | 6.67676036004  |
| NM_002211    | ITGB1   | 211  | 285  | 4.50682862755  |
| NM_002211    | ITGB1   | 2228 | 2280 | 4.82876344594  |
| NM_002213    | ITGB5   | 1421 | 1468 | 7.57108913126  |
| NM_002213    | ITGB5   | 481  | 528  | 7.16519557731  |
| NM_002213    | ITGB5   | 1854 | 1880 | 5.24531718652  |
| NM_002213    | ITGB5   | 94   | 153  | 7.24933478668  |
| NM_002216    | ITIH2   | 2480 | 2523 | 3.16617865615  |
| NM_002216    | ITIH2   | 2543 | 2601 | 2.84425056126  |
| NM_002216    | ITIH2   | 53   | 101  | 0.840232961088 |
| NM_002216    | ITIH2   | 1975 | 2092 | 5.21348437093  |
| NM_002216    | ITIH2   | 1219 | 1257 | 0.255270460367 |
| NM_002216    | ITIH2   | 399  | 448  | 2.25928782462  |
| NM_002216    | ITIH2   | 1630 | 1768 | 4.25928806054  |
| NM_002216    | ITIH2   | 2665 | 2705 | 0.844250561261 |
| NM_002216    | ITIH2   | 2307 | 2403 | 3.50721557398  |
| NM_002216    | ITIH2   | 492  | 666  | 5.42921306198  |
| NM_002216    | ITIH2   | 1770 | 1968 | 4.65160548332  |
| NM_002216    | ITIH2   | 941  | 1088 | 5.25928806054  |
| NM_002216    | ITIH2   | 228  | 326  | 4.65160548332  |
| NM_002216    | ITIH2   | 1331 | 1429 | 2.71871967918  |
| NM_002216    | ITIH2   | 2724 | 2987 | 5.58121615543  |
| NM_002216    | ITIH2   | 672  | 838  | 5.04064777406  |
| NM_002216    | ITIH2   | 1104 | 1203 | 2.25928806054  |
| NM_002216    | ITIH2   | 2182 | 2229 | 0.844243830207 |
| NM_002216    | ITIH2   | 1497 | 1614 | 4.38857107748  |
| NM_031370    | HNRNPD  | 356  | 399  | 3.08664944538  |
| NM_004415    | DSP     | 4829 | 4885 | 0.851135834785 |
| NM_004415    | DSP     | 2680 | 2743 | 1.8551467039   |
| NM_004415    | DSP     | 1572 | 1650 | 1.85497968464  |
| NM_018208    | ETNK2   | 266  | 286  | 7.44744745376  |
| NM_018202    | TMEM57  | 1133 | 1174 | 6.03276435974  |
| NM_012325    | MAPRE1  | 672  | 730  | 1.76573435748  |
| NM_012321    | LSM4    | 515  | 537  | 6.28784660564  |
| NM_001190328 | YJEFN3  | 516  | 539  | 10.3274957059  |
| NM_014944    | CLSTN1  | 3368 | 3463 | 5.93303695878  |
| NM_014944    | CLSTN1  | 2540 | 2571 | 5.43386698117  |
| NM_014944    | CLSTN1  | 2331 | 2430 | 6.51800619056  |
| NM_014944    | CLSTN1  | 1990 | 2039 | 5.84890448045  |
| NM_014944    | CLSTN1  | 2060 | 2137 | 6.73638101172  |
| NM_005073    | SLC15A1 | 2029 | 2067 | 13.9281179882  |
| NM_015092    | SMG1    | 3284 | 3331 | 5.87794490452  |
| NM_022486    | SUSD1   | 582  | 618  | 6.35977426454  |

|              |         |       |       |               |
|--------------|---------|-------|-------|---------------|
| NM_032348    | MXRA8   | 662   | 701   | 7.01219234076 |
| NM_025211    | GKAP1   | 265   | 288   | 6.43325020007 |
| NM_001135789 | PPIAL4C | 531   | 564   | 4.60602586396 |
| NM_000189    | HK2     | 1264  | 1291  | 4.50017590174 |
| NM_001197026 | PLEKHA8 | 6820  | 6839  | 8.54456037815 |
| NM_017801    | CMTM6   | 2719  | 2741  | 9.11503019537 |
| NM_018976    | SLC38A2 | 1526  | 1602  | 5.7966445382  |
| NM_018976    | SLC38A2 | 280   | 358   | 5.40071586187 |
| NM_018976    | SLC38A2 | 453   | 497   | 3.39057723393 |
| NM_018976    | SLC38A2 | 1739  | 1783  | 2.06864913904 |
| NM_018976    | SLC38A2 | 1433  | 1487  | 3.15278161737 |
| NM_018976    | SLC38A2 | 674   | 719   | 4.73775084914 |
| NM_018976    | SLC38A2 | 821   | 922   | 4.32271334987 |
| NM_018976    | SLC38A2 | 1235  | 1425  | 7.66058298862 |
| NM_018976    | SLC38A2 | 1836  | 1933  | 4.85322806656 |
| NM_018976    | SLC38A2 | 1612  | 1675  | 4.32271334987 |
| NM_018976    | SLC38A2 | 754   | 821   | 1.14877074825 |
| NM_018976    | SLC38A2 | 979   | 1217  | 7.51034035304 |
| NM_018976    | SLC38A2 | 556   | 618   | 4.4747164433  |
| NM_138455    | CTHRC1  | 716   | 774   | 8.46458260467 |
| NM_001199292 | HSD17B4 | 686   | 717   | 4.65389283946 |
| NM_001645    | APOC1   | 327   | 376   | 4.18710657287 |
| NM_001645    | APOC1   | 90    | 141   | 5.85620828297 |
| NM_001645    | APOC1   | 195   | 300   | 6.59317387714 |
| NM_030782    | CLPTM1L | 255   | 289   | 5.54209698567 |
| NM_021871    | FGA     | 1400  | 1477  | 1.70650969203 |
| NM_021871    | FGA     | 1497  | 1550  | 1.70650969225 |
| NM_021871    | FGA     | 813   | 877   | 3.14708228364 |
| NM_021871    | FGA     | 433   | 478   | 2.35858638883 |
| NM_021871    | FGA     | 887   | 1095  | 4.51386461431 |
| NM_021871    | FGA     | 1281  | 1340  | 1.21706526491 |
| NM_021871    | FGA     | 524   | 678   | 3.94354888955 |
| NM_021871    | FGA     | 200   | 285   | 2.06907977164 |
| NM_021871    | FGA     | 1128  | 1239  | 2.8060453658  |
| NM_021870    | FGG     | 1184  | 1244  | 1.35964024031 |
| NM_021870    | FGG     | 749   | 828   | 3.06008019437 |
| NM_021870    | FGG     | 423   | 500   | 2.16699539806 |
| NM_021870    | FGG     | 953   | 1007  | 2.35964047623 |
| NM_021870    | FGG     | 1140  | 1179  | 1.67755097094 |
| NM_145802    | SEPT6   | 1875  | 1896  | 6.466854156   |
| NM_001143944 | LEMD2   | 675   | 778   | 8.12761416935 |
| NM_001143944 | LEMD2   | 459   | 503   | 6.95768243686 |
| NM_001143944 | LEMD2   | 362   | 459   | 7.76504408997 |
| NM_014770    | AGAP2   | 3485  | 3505  | 12.724972067  |
| NM_005245    | FAT1    | 8938  | 8995  | 7.22517676945 |
| NM_005245    | FAT1    | 13433 | 13472 | 6.89923108194 |
| NM_005245    | FAT1    | 8312  | 8362  | 5.90324868211 |
| NM_005245    | FAT1    | 12552 | 12606 | 6.90324844619 |
| NM_005245    | FAT1    | 1055  | 1106  | 6.81910947273 |
| NM_005245    | FAT1    | 11855 | 11889 | 6.81910947273 |

|              |        |      |      |               |
|--------------|--------|------|------|---------------|
| NM_005245    | FAT1   | 2295 | 2330 | 7.48419358266 |
| NM_005245    | FAT1   | 5973 | 6015 | 5.9030749318  |
| NM_005245    | FAT1   | 1756 | 1806 | 4.89923108194 |
| NM_005245    | FAT1   | 3462 | 3495 | 6.81910947273 |
| NM_005245    | FAT1   | 4317 | 4345 | 6.48419358266 |
| NM_005245    | FAT1   | 8071 | 8123 | 7.22517004595 |
| NM_002661    | PLCG2  | 7941 | 8179 | 16.920857084  |
| NM_013446    | MKRN1  | 1342 | 1362 | 6.16581305662 |
| NM_001097642 | GJB1   | 578  | 612  | 4.24651708224 |
| NM_052972    | LRG1   | 1063 | 1105 | 9.35757322421 |
| NM_052972    | LRG1   | 343  | 384  | 7.95552352011 |
| NM_052972    | LRG1   | 492  | 596  | 10.8470176516 |
| NM_052972    | LRG1   | 627  | 745  | 10.6246252302 |
| NM_052972    | LRG1   | 846  | 950  | 9.03966272949 |
| NM_178040    | ERC1   | 7559 | 7583 | 6.49039410717 |
| NM_021090    | MTMR3  | 774  | 793  | 7.74889049679 |
| NM_021095    | SLC5A6 | 1049 | 1113 | 7.74976350717 |
| NM_021095    | SLC5A6 | 1216 | 1285 | 7.21523142622 |
| NM_021095    | SLC5A6 | 1624 | 1675 | 3.96518481557 |
| NM_021095    | SLC5A6 | 999  | 1048 | 7.04932402495 |
| NM_021095    | SLC5A6 | 889  | 957  | 7.21907527608 |
| NM_021095    | SLC5A6 | 370  | 406  | 6.63428628975 |
| NM_001076785 | SLC7A6 | 1801 | 1823 | 8.56732628093 |
| NM_006809    | TOMM34 | 453  | 488  | 5.58444325938 |
| NM_006801    | KDEL1  | 327  | 357  | 5.67654102454 |
| NM_006801    | KDEL1  | 679  | 708  | 6.67654775559 |
| NM_006801    | KDEL1  | 438  | 494  | 7.67654775559 |
| NM_006801    | KDEL1  | 231  | 282  | 5.67654102454 |
| NM_006801    | KDEL1  | 523  | 574  | 7.26151025631 |
| NM_006801    | KDEL1  | 411  | 438  | 6.89894017692 |
| NM_133259    | LRPPRC | 2216 | 2271 | 3.51696760186 |
| NM_133259    | LRPPRC | 712  | 731  | 3.59708921107 |
| NM_133259    | LRPPRC | 3173 | 3198 | 3.51696760186 |
| NM_000365    | TPI1   | 493  | 526  | 2.05294939924 |
| NM_000365    | TPI1   | 220  | 303  | 2.05696026836 |
| NM_003321    | TUFM   | 679  | 756  | 7.20527302824 |
| NM_003321    | TUFM   | 334  | 413  | 5.20509927792 |
| NM_003321    | TUFM   | 610  | 679  | 4.94223862241 |
| NM_003321    | TUFM   | 998  | 1061 | 4.94223862241 |
| NM_003321    | TUFM   | 212  | 254  | 5.34352624019 |
| NM_003321    | TUFM   | 786  | 888  | 5.42766544958 |
| NM_006200    | PCSK5  | 2210 | 2253 | 13.7801055467 |
| NM_006200    | PCSK5  | 1017 | 1076 | 14.1991539151 |
| NM_003329    | TXN    | 375  | 408  | 5.32130456679 |
| NM_006208    | ENPP1  | 2387 | 2445 | 3.61927006766 |
| NM_004539    | NARS   | 705  | 724  | 3.34462160633 |
| NM_004539    | NARS   | 1735 | 1806 | 4.66654970122 |
| NM_001004333 | RNASEK | 373  | 427  | 7.91613098173 |
| NM_198447    | GOLT1A | 243  | 305  | 7.34089172582 |
| NM_000181    | GUSB   | 1308 | 1371 | 7.3554831153  |

|              |          |      |      |                 |               |
|--------------|----------|------|------|-----------------|---------------|
| NM_000181    | GUSB     | 175  | 215  | 6.61834377082   |               |
| NM_000181    | GUSB     | 751  | 794  | 7.03355502041   |               |
| NM_000181    | GUSB     | 679  | 729  | 5.94941581104   |               |
| NM_000181    | GUSB     | 1183 | 1243 | 6.61851728522   |               |
| NM_000181    | GUSB     | 926  | 993  | 6.61851751359   |               |
| NM_000181    | GUSB     | 1653 | 1689 | 6.0335550202    |               |
| NM_000181    | GUSB     | 1380 | 1493 | 9.28148253386   |               |
| NM_000181    | GUSB     | 1868 | 1944 | 8.61851752114   |               |
| NM_000181    | GUSB     | 227  | 348  | 9.20348002186   |               |
| NM_000181    | GUSB     | 389  | 506  | 9.12101786167   |               |
| NM_000181    | GUSB     | 839  | 924  | 7.84090993493   |               |
| NM_000181    | GUSB     | 1545 | 1652 | 8.94044561603   |               |
| NM_000185    | SERPIND1 |      | 254  | 335             | 3.94782905359 |
| NM_000185    | SERPIND1 |      | 1000 | 1035            | 1.69376507868 |
| NM_000185    | SERPIND1 |      | 343  | 407             | 2.2787275794  |
| NM_001197129 | SYS1     | 657  | 687  | 9.80317647317   |               |
| NM_000981    | RPL19    | 651  | 700  | -0.768405979653 |               |
| NM_000981    | RPL19    | 326  | 444  | 1.45800404186   |               |
| NM_000984    | RPL23A   | 346  | 393  | 1.45143514793   |               |
| NM_000984    | RPL23A   | 150  | 194  | 2.32590426585   |               |
| NM_000984    | RPL23A   | 426  | 473  | 1.45143514793   |               |
| NM_000985    | RPL17    | 212  | 277  | 6.69078233822   |               |
| NM_013279    | C11orf9  | 834  | 886  | 8.40017723793   |               |
| NM_013279    | C11orf9  | 3084 | 3138 | 10.1373165822   |               |
| NM_002056    | GFPT1    | 7510 | 7540 | 2.74588529387   |               |
| NM_002056    | GFPT1    | 1701 | 1732 | 3.74187442475   |               |
| NM_000263    | NAGLU    | 1346 | 1402 | 9.33329926517   |               |
| NM_000263    | NAGLU    | 1926 | 1972 | 10.2077751141   |               |
| NM_000263    | NAGLU    | 1433 | 1500 | 8.66420428612   |               |
| NM_000263    | NAGLU    | 1150 | 1197 | 7.66420428612   |               |
| NM_005907    | MAN1A1   | 82   | 125  | 4.74105974153   |               |
| NM_005907    | MAN1A1   | 2285 | 2347 | 6.85653695896   |               |
| NM_005907    | MAN1A1   | 1803 | 1847 | 5.47802509979   |               |
| NM_005907    | MAN1A1   | 1924 | 1987 | 5.74105974154   |               |
| NM_005907    | MAN1A1   | 778  | 850  | 3.15609050976   |               |
| NM_005907    | MAN1A1   | 1995 | 2034 | 4.96345215532   |               |
| NM_005907    | MAN1A1   | 1250 | 1287 | 4.96344543182   |               |
| NM_005907    | MAN1A1   | 401  | 458  | 5.15609724059   |               |
| NM_005907    | MAN1A1   | 559  | 586  | 3.73704214136   |               |
| NM_005907    | MAN1A1   | 142  | 218  | 5.32602224226   |               |
| NM_005907    | MAN1A1   | 899  | 939  | 4.47400773553   |               |
| NM_005907    | MAN1A1   | 1072 | 1107 | 5.1559234905    |               |
| NM_005907    | MAN1A1   | 223  | 262  | 3.15207964064   |               |
| NM_005907    | MAN1A1   | 595  | 661  | 4.15609050976   |               |
| NM_005907    | MAN1A1   | 852  | 879  | 3.07195803143   |               |
| NM_005907    | MAN1A1   | 1152 | 1185 | 3.15609724081   |               |
| NM_005907    | MAN1A1   | 2073 | 2155 | 6.06298783642   |               |
| NM_005907    | MAN1A1   | 7    | 81   | 4.74105974153   |               |
| NM_005907    | MAN1A1   | 939  | 1067 | 5.96345216287   |               |
| NM_005907    | MAN1A1   | 1606 | 1768 | 7.32602224226   |               |



|              |         |      |      |                |
|--------------|---------|------|------|----------------|
| NM_005907    | MAN1A1  | 1290 | 1529 | 7.4780253357   |
| NM_002582    | PARN    | 101  | 124  | 6.31849081506  |
| NM_002276    | KRT19   | 1046 | 1086 | 5.69616808192  |
| NM_002276    | KRT19   | 607  | 667  | 6.26573411093  |
| NM_002276    | KRT19   | 521  | 601  | 6.26573411826  |
| NM_002273    | KRT8    | 809  | 849  | 2.39366924466  |
| NM_002273    | KRT8    | 1274 | 1329 | 3.85310759435  |
| NM_002273    | KRT8    | 298  | 342  | 2.30953676633  |
| NM_002273    | KRT8    | 1221 | 1263 | 0.393669244656 |
| NM_002273    | KRT8    | 690  | 740  | 3.56360097715  |
| NM_002273    | KRT8    | 221  | 286  | 2.38965837554  |
| NM_002273    | KRT8    | 1007 | 1084 | 4.09411569385  |
| NM_002273    | KRT8    | 892  | 994  | 4.64160348915  |
| NM_002273    | KRT8    | 1430 | 1553 | 3.85310759435  |
| NM_002273    | KRT8    | 532  | 661  | 4.09411569385  |
| NM_002271    | IP05    | 1244 | 1290 | 4.17087158696  |
| NM_002271    | IP05    | 1053 | 1122 | 5.17087158696  |
| NM_001166168 | NEK6    | 3    | 23   | 3.79385149256  |
| NM_032551    | KISS1R  | 399  | 443  | 13.3244300521  |
| NM_005581    | BCAM    | 1936 | 2003 | 5.58538106595  |
| NM_005581    | BCAM    | 1062 | 1119 | 3.00426241509  |
| NM_005588    | MEP1A   | 912  | 957  | 10.2912856823  |
| NM_005588    | MEP1A   | 538  | 585  | 10.0282512764  |
| NM_005588    | MEP1A   | 728  | 771  | 9.28726808966  |
| NM_005588    | MEP1A   | 1502 | 1543 | 9.20714648045  |
| NM_005588    | MEP1A   | 2077 | 2113 | 9.70614943879  |
| NM_005588    | MEP1A   | 379  | 442  | 10.2912856896  |
| NM_012302    | LPHN2   | 833  | 881  | 8.53674919309  |
| NM_012302    | LPHN2   | 1929 | 1989 | 8.53290534323  |
| NM_003468    | FZD5    | 2146 | 2209 | 8.15849210965  |
| NM_003468    | FZD5    | 1244 | 1284 | 8.15849210965  |
| NM_003468    | FZD5    | 1934 | 2014 | 7.42554411566  |
| NM_005721    | ACTR3   | 819  | 864  | 4.77970220722  |
| NM_005052    | RAC3    | 321  | 360  | 9.10392576009  |
| NM_005722    | ACTR2   | 1081 | 1114 | 4.15110582331  |
| NM_005724    | TSPAN3  | 790  | 824  | 4.62233247196  |
| NM_005724    | TSPAN3  | 652  | 695  | 5.20746871545  |
| NM_005724    | TSPAN3  | 851  | 879  | 4.61848862211  |
| NM_005724    | TSPAN3  | 498  | 528  | 5.12332951362  |
| NM_018086    | FIGN    | 3960 | 3981 | 10.8932177327  |
| NM_001009813 | MEIS3   | 297  | 319  | 11.587095259   |
| NM_130445    | COL18A1 | 160  | 187  | 6.59926838696  |
| NM_130445    | COL18A1 | 3814 | 3855 | 7.68340086529  |
| NM_130445    | COL18A1 | 566  | 619  | 8.0984450954   |
| NM_130445    | COL18A1 | 2450 | 2525 | 7.68340759634  |
| NM_130445    | COL18A1 | 15   | 68   | 6.68323384602  |
| NM_130445    | COL18A1 | 660  | 726  | 7.42036645945  |
| NM_130445    | COL18A1 | 1830 | 1904 | 7.42037319051  |
| NM_130445    | COL18A1 | 737  | 824  | 8.68340759634  |
| NM_130445    | COL18A1 | 3898 | 3940 | 8.09844509562  |

|              |            |      |      |               |               |
|--------------|------------|------|------|---------------|---------------|
| NM_130445    | COL18A1    | 2113 | 2213 | 9.00533569123 |               |
| NM_130445    | COL18A1    | 91   | 138  | 6.0984448597  |               |
| NM_130445    | COL18A1    | 3109 | 3164 | 7.82166080829 |               |
| NM_130445    | COL18A1    | 2755 | 2836 | 8.0984448597  |               |
| NM_015355    | SUZ12      | 290  | 335  | 4.31241422713 |               |
| NM_022465    | IKZF4      | 1647 | 1666 | 10.8754830041 |               |
| NM_022465    | IKZF4      | 366  | 389  | 9.87932685391 |               |
| NM_022464    | SIL1       | 722  | 750  | 8.71475948735 |               |
| NM_022464    | SIL1       | 1432 | 1502 | 6.8404573887  |               |
| NM_022464    | SIL1       | 975  | 1021 | 7.25532786871 |               |
| NM_001032    | RPS29      | 45   | 76   | 4.34207296289 |               |
| NM_001142305 | ZNF771     | 159  | 185  | 11.4119720314 |               |
| NM_001110    | ADAM10     | 1734 | 1781 | 6.06884687861 |               |
| NM_001110    | ADAM10     | 1410 | 1448 | 5.3358988844  |               |
| NM_001110    | ADAM10     | 871  | 917  | 7.65782697951 |               |
| NM_001110    | ADAM10     | 791  | 840  | 6.75093638368 |               |
| NM_001110    | ADAM10     | 1843 | 1874 | 6.33589888461 |               |
| NM_001110    | ADAM10     | 2150 | 2212 | 6.33589888462 |               |
| NM_001110    | ADAM10     | 1147 | 1187 | 5.74691878373 |               |
| NM_001110    | ADAM10     | 2447 | 2522 | 7.7509363839  |               |
| NM_001110    | ADAM10     | 1994 | 2060 | 6.7509363839  |               |
| NM_001110    | ADAM10     | 379  | 413  | 4.74691878373 |               |
| NM_001110    | ADAM10     | 1053 | 1076 | 3.75076263358 |               |
| NM_001110    | ADAM10     | 1326 | 1367 | 6.55829129841 |               |
| NM_016489    | NT5C3      | 882  | 920  | 7.52896043703 |               |
| NM_016489    | NT5C3      | 714  | 751  | 5.61309291536 |               |
| NM_172020    | POM121     | 422  | 446  | 7.97506142127 |               |
| NM_016077    | PTRH2      | 349  | 392  | 3.53218366832 |               |
| NM_016077    | PTRH2      | 550  | 610  | 4.61230527754 |               |
| NM_030981    | RAB1B      | 1030 | 1109 | 6.73251380206 |               |
| NM_015937    | PIGT       | 821  | 891  | 8.83133570115 |               |
| NM_015937    | PIGT       | 1254 | 1302 | 8.51342519888 |               |
| NM_015937    | PIGT       | 1153 | 1205 | 8.51341847538 |               |
| NM_138432    | SDSL       | 602  | 621  | 12.6443615347 |               |
| NM_007348    | ATF6       | 1931 | 2032 | 6.75986042472 |               |
| NM_017684    | VPS13C     | 9976 | 9996 | 8.25053193844 |               |
| NM_025099    | CTC1       | 5201 | 5230 | 11.726014565  |               |
| NM_025099    | CTC1       | 4834 | 4861 | 11.0479428883 |               |
| NM_024324    | CRELD2     | 963  | 1031 | 9.82988297425 |               |
| NM_024324    | CRELD2     | 749  | 846  | 7.82988297425 |               |
| NM_003514    | HIST1H2AM  |      | 33   | 61            | 7.54136937072 |
| NM_003514    | HIST1H2AM  |      | 345  | 421           | 9.54538696335 |
| NM_003516    | HIST2H2AA3 |      | 225  | 285           | 6.90393945011 |
| NM_003516    | HIST2H2AA3 |      | 315  | 349           | 5.90778329997 |
| NM_003517    | HIST2H2AC  |      | 262  | 296           | 6.49460135726 |
| NM_003517    | HIST2H2AC  |      | 153  | 232           | 7.49477487166 |
| NM_003512    | HIST1H2AC  |      | 66   | 106           | 9.08304352092 |
| NM_003045    | SLC7A1     | 1579 | 1628 | 8.4875832885  |               |
| NM_003045    | SLC7A1     | 719  | 787  | 8.48758328827 |               |
| NM_003045    | SLC7A1     | 1718 | 1749 | 7.68022813052 |               |

|              |         |      |      |               |
|--------------|---------|------|------|---------------|
| NM_003045    | SLC7A1  | 1127 | 1161 | 7.26117326699 |
| NM_003045    | SLC7A1  | 998  | 1061 | 7.68022836644 |
| NM_003045    | SLC7A1  | 1245 | 1280 | 8.68022835889 |
| NM_003045    | SLC7A1  | 1856 | 1881 | 8.26117326699 |
| NM_003045    | SLC7A1  | 2230 | 2264 | 5.67621076627 |
| NM_003045    | SLC7A1  | 1065 | 1110 | 6.68022163539 |
| NM_003045    | SLC7A1  | 6142 | 6217 | 6.67621076627 |
| NM_003045    | SLC7A1  | 2090 | 2192 | 8.00215646133 |
| NM_001139457 | BCAP31  | 1330 | 1372 | 2.30861238188 |
| NM_001139457 | BCAP31  | 839  | 889  | 6.09319130941 |
| NM_001139457 | BCAP31  | 952  | 1013 | 5.97771409199 |
| NM_001139457 | BCAP31  | 1187 | 1235 | 5.56267659271 |
| NM_001139457 | BCAP31  | 788  | 832  | 4.7146729551  |
| NM_001139457 | BCAP31  | 1050 | 1186 | 6.64067910471 |
| NM_080605    | B3GALT6 | 745  | 788  | 10.9629592667 |
| NM_005262    | GFER    | 1481 | 1502 | 6.42760860286 |
| NM_005918    | MDH2    | 412  | 451  | 4.68999804336 |
| NM_032121    | MAGT1   | 728  | 781  | 9.26530469848 |
| NM_032121    | MAGT1   | 175  | 245  | 6.26513094816 |
| NM_032121    | MAGT1   | 503  | 542  | 7.58723279336 |
| NM_032121    | MAGT1   | 655  | 696  | 8.4350559496  |
| NM_032121    | MAGT1   | 319  | 377  | 7.58722606231 |
| NM_032121    | MAGT1   | 1015 | 1122 | 9.58723279336 |
| NM_144568    | TMEM55B | 191  | 218  | 8.21763856255 |
| NM_001127662 | GSN     | 372  | 410  | 2.87726433231 |
| NM_001127662 | GSN     | 608  | 659  | 3.68462597788 |
| NM_001127662 | GSN     | 1992 | 2029 | 2.46205981377 |
| NM_001127662 | GSN     | 183  | 210  | 3.37809435471 |
| NM_001127662 | GSN     | 2055 | 2100 | 3.46223332817 |
| NM_001127662 | GSN     | 2242 | 2328 | 2.87727105582 |
| NM_001127662 | GSN     | 2155 | 2214 | 3.46223356408 |
| NM_001127662 | GSN     | 1700 | 1790 | 2.46223356409 |
| NM_005308    | GRK5    | 21   | 56   | 5.77802285073 |
| NM_004481    | GALNT2  | 1092 | 1134 | 6.65177616103 |
| NM_004481    | GALNT2  | 1004 | 1080 | 7.01451325967 |
| NM_004481    | GALNT2  | 617  | 704  | 7.01451999073 |
| NM_012207    | HNRNPH3 | 589  | 622  | 3.76854680899 |
| NM_052916    | RNF157  | 866  | 889  | 11.6307989694 |
| NM_001344    | DAD1    | 71   | 126  | 4.57465083538 |
| NM_001344    | DAD1    | 148  | 199  | 2.57464411188 |
| NM_022075    | CERS2   | 1065 | 1124 | 6.3037527532  |
| NM_022075    | CERS2   | 188  | 227  | 5.3037527532  |
| NM_022075    | CERS2   | 1837 | 1900 | 6.03670074719 |
| NM_022075    | CERS2   | 373  | 486  | 7.88871525392 |
| NM_022075    | CERS2   | 1195 | 1257 | 7.52614517454 |
| NM_022075    | CERS2   | 666  | 733  | 5.71477265231 |
| NM_022075    | CERS2   | 1371 | 1456 | 7.3037527532  |
| NM_022075    | CERS2   | 571  | 629  | 5.3037527532  |
| NM_014437    | SLC39A1 | 884  | 949  | 8.65334065895 |
| NM_014437    | SLC39A1 | 1407 | 1456 | 8.23428555951 |

|              |         |      |      |                |
|--------------|---------|------|------|----------------|
| NM_014437    | SLC39A1 | 1058 | 1105 | 9.23812940936  |
| NM_014437    | SLC39A1 | 1188 | 1262 | 10.653340659   |
| NM_014437    | SLC39A1 | 732  | 778  | 9.23830315967  |
| NM_014437    | SLC39A1 | 1013 | 1043 | 7.64932305879  |
| NM_004731    | SLC16A7 | 1189 | 1266 | 13.8514765679  |
| NM_004731    | SLC16A7 | 1270 | 1337 | 13.2665140672  |
| NM_004731    | SLC16A7 | 1463 | 1543 | 13.2665140672  |
| NM_004731    | SLC16A7 | 1024 | 1087 | 14.4364390686  |
| NM_004733    | SLC33A1 | 1842 | 1882 | 9.00339888414  |
| NM_004733    | SLC33A1 | 1158 | 1187 | 9.50257558525  |
| NM_004733    | SLC33A1 | 943  | 1029 | 11.0875380935  |
| NM_004733    | SLC33A1 | 1040 | 1075 | 9.08352049335  |
| NM_004733    | SLC33A1 | 1928 | 1972 | 9.49855799263  |
| NM_004086    | COCH    | 1020 | 1065 | 8.02904863128  |
| NM_004086    | COCH    | 627  | 676  | 9.48848048584  |
| NM_004086    | COCH    | 1120 | 1203 | 8.61401136792  |
| NM_004086    | COCH    | 885  | 931  | 8.02887511688  |
| NM_004086    | COCH    | 1565 | 1620 | 8.35097023103  |
| NM_000340    | SLC2A2  | 1455 | 1481 | 7.05548603654  |
| NM_000340    | SLC2A2  | 788  | 808  | 5.97134682716  |
| NM_000340    | SLC2A2  | 705  | 752  | 7.97134682716  |
| NM_000340    | SLC2A2  | 915  | 989  | 8.37741413143  |
| NM_000340    | SLC2A2  | 1673 | 1723 | 7.97134682716  |
| NM_000340    | SLC2A2  | 546  | 581  | 7.55630932788  |
| NM_000434    | NEU1    | 322  | 390  | 9.03907304121  |
| NM_000434    | NEU1    | 177  | 285  | 9.03907304121  |
| NM_000434    | NEU1    | 798  | 853  | 10.1910761347  |
| NM_000434    | NEU1    | 718  | 771  | 8.19107613466  |
| NM_000434    | NEU1    | 1173 | 1204 | 7.45410380944  |
| NM_000434    | NEU1    | 1008 | 1054 | 7.86914803955  |
| NM_000434    | NEU1    | 142  | 172  | 6.86914130872  |
| NM_000434    | NEU1    | 536  | 615  | 8.86914803977  |
| NM_000434    | NEU1    | 1678 | 1765 | 7.86914130872  |
| NM_000434    | NEU1    | 1056 | 1167 | 10.11707555532 |
| NM_006827    | TMED10  | 499  | 544  | 6.82956283656  |
| NM_006827    | TMED10  | 214  | 289  | 5.82956283656  |
| NM_006827    | TMED10  | 340  | 458  | 6.82956283656  |
| NM_006825    | CKAP4   | 1713 | 1786 | 6.33112994412  |
| NM_006825    | CKAP4   | 1624 | 1707 | 5.65305803901  |
| NM_006825    | CKAP4   | 2570 | 2616 | 4.83195323546  |
| NM_006825    | CKAP4   | 655  | 719  | 6.50105494534  |
| NM_006825    | CKAP4   | 1823 | 1878 | 5.91609244462  |
| NM_006825    | CKAP4   | 1031 | 1072 | 4.33095619381  |
| NM_006825    | CKAP4   | 1493 | 1526 | 4.32711234395  |
| NM_006825    | CKAP4   | 857  | 903  | 5.24699073474  |
| NM_006825    | CKAP4   | 287  | 325  | 4.33112321307  |
| NM_006825    | CKAP4   | 1277 | 1440 | 7.03156966227  |
| NM_006825    | CKAP4   | 763  | 816  | 4.9160924373   |
| NM_006825    | CKAP4   | 1181 | 1272 | 5.91609244485  |
| NM_001168236 | ABL2    | 18   | 52   | 11.2045800563  |

|              |          |      |      |                    |
|--------------|----------|------|------|--------------------|
| NM_020123    | TM9SF3   | 1484 | 1533 | 7.0589637135       |
| NM_020123    | TM9SF3   | 260  | 311  | 4.73301801844      |
| NM_020123    | TM9SF3   | 1078 | 1113 | 6.32199138828      |
| NM_020123    | TM9SF3   | 1901 | 1949 | 5.73703561861      |
| NM_020123    | TM9SF3   | 465  | 501  | 6.23785890995      |
| NM_020123    | TM9SF3   | 996  | 1047 | 6.05896371349      |
| NM_020123    | TM9SF3   | 1240 | 1281 | 3.65289640922      |
| NM_020123    | TM9SF3   | 632  | 695  | 6.0589637135       |
| NM_020123    | TM9SF3   | 1620 | 1722 | 6.73703561861      |
| NM_020123    | TM9SF3   | 1119 | 1186 | 6.90696062004      |
| NM_020120    | UGGT1    | 2035 | 2094 | 7.66561002257      |
| NM_020120    | UGGT1    | 730  | 800  | 6.66561002257      |
| NM_020120    | UGGT1    | 1156 | 1209 | 6.66543627225      |
| NM_020120    | UGGT1    | 3647 | 3711 | 6.40257561651      |
| NM_020120    | UGGT1    | 1861 | 1912 | 6.66561002235      |
| NM_020120    | UGGT1    | 4428 | 4471 | 4.99650831247      |
| NM_020120    | UGGT1    | 1784 | 1852 | 3.99650831247      |
| NM_020120    | UGGT1    | 1263 | 1307 | 6.66561001502      |
| NM_020120    | UGGT1    | 1402 | 1458 | 6.40256888568      |
| NM_020120    | UGGT1    | 4586 | 4622 | 5.58147081319      |
| NM_020120    | UGGT1    | 633  | 661  | 6.40257538082      |
| NM_020120    | UGGT1    | 3132 | 3159 | 4.08047377153      |
| NM_020120    | UGGT1    | 3465 | 3513 | 4.08064752185      |
| NM_020120    | UGGT1    | 3816 | 3913 | 7.66561002257      |
| NM_020120    | UGGT1    | 1042 | 1109 | 6.0806407908       |
| NM_020121    | UGGT2    | 923  | 959  | 6.27336874878      |
| NM_004559    | YBX1     | 35   | 103  | 1.01000616117      |
| NM_001003962 | CAPNS1   | 175  | 206  | 4.68198917473      |
| NM_001003962 | CAPNS1   | 252  | 303  | 4.68198917473      |
| NM_020342    | SLC39A10 |      | 1639 | 1669 8.04261075954 |
| NM_020342    | SLC39A10 |      | 1848 | 1905 6.4536306662  |
| NM_020348    | CNNM1    | 699  | 723  | 11.4957379491      |
| NM_001033855 | DCLRE1C  | 5672 | 5695 | 8.57840565585      |
| NM_182917    | EIF4G1   | 2906 | 2961 | 6.26716616125      |
| NM_182917    | EIF4G1   | 4368 | 4440 | 5.94523806636      |
| NM_182917    | EIF4G1   | 3342 | 3381 | 4.94523806614      |
| NM_182917    | EIF4G1   | 5036 | 5107 | 5.75259298842      |
| NM_182917    | EIF4G1   | 4509 | 4561 | 5.18302695186      |
| NM_182917    | EIF4G1   | 5313 | 5353 | 5.26716616102      |
| NM_182917    | EIF4G1   | 3830 | 3894 | 4.53002681676      |
| NM_002074    | GNB1     | 857  | 932  | 4.83871671728      |
| NM_002074    | GNB1     | 83   | 109  | 3.92284919561      |
| NM_002076    | GNS      | 326  | 358  | 6.17512019372      |
| NM_002076    | GNS      | 1206 | 1249 | 4.59015769299      |
| NM_002076    | GNS      | 1456 | 1514 | 6.99622499727      |
| NM_002076    | GNS      | 1525 | 1644 | 7.2592594031       |
| NM_002076    | GNS      | 768  | 900  | 7.48165182444      |
| NM_002076    | GNS      | 1781 | 1843 | 6.99622498972      |
| NM_002076    | GNS      | 482  | 549  | 6.25925916718      |
| NM_130440    | PTPRF    | 2279 | 2333 | 6.46510088343      |

|           |          |      |      |                    |
|-----------|----------|------|------|--------------------|
| NM_130440 | PTPRF    | 185  | 236  | 6.0540807484       |
| NM_130440 | PTPRF    | 1679 | 1732 | 6.79104657094      |
| NM_130440 | PTPRF    | 3106 | 3149 | 4.46510088343      |
| NM_130440 | PTPRF    | 3427 | 3493 | 6.05006338415      |
| NM_130440 | PTPRF    | 2582 | 2640 | 7.19233419627      |
| NM_130440 | PTPRF    | 2336 | 2396 | 7.63904348504      |
| NM_130440 | PTPRF    | 297  | 346  | 6.05006338415      |
| NM_130440 | PTPRF    | 1952 | 2001 | 4.46911175254      |
| NM_130440 | PTPRF    | 5374 | 5417 | 4.38497927421      |
| NM_130440 | PTPRF    | 4068 | 4111 | 6.05006338415      |
| NM_130440 | PTPRF    | 5757 | 5823 | 7.05408098432      |
| NM_130440 | PTPRF    | 3869 | 3916 | 5.46894473328      |
| NM_130440 | PTPRF    | 2995 | 3054 | 6.0540809841       |
| NM_145169 | SFT2D1   | 356  | 412  | 6.0462700634       |
| NM_006487 | FBLN1    | 1363 | 1464 | 8.15244105974      |
| NM_006487 | FBLN1    | 963  | 1023 | 7.56747855902      |
| NM_006487 | FBLN1    | 1805 | 1841 | 6.15244105974      |
| NM_006487 | FBLN1    | 723  | 796  | 7.81540607247      |
| NM_006487 | FBLN1    | 63   | 142  | 5.06830185036      |
| NM_006487 | FBLN1    | 1114 | 1160 | 5.56747182797      |
| NM_006487 | FBLN1    | 818  | 960  | 9.18218840314      |
| NM_006487 | FBLN1    | 1292 | 1356 | 7.81540607247      |
| NM_006487 | FBLN1    | 1531 | 1620 | 6.73740356047      |
| NM_006487 | FBLN1    | 1163 | 1288 | 8.37483348108      |
| NM_006487 | FBLN1    | 224  | 349  | 8.88940665391      |
| NM_006487 | FBLN1    | 1668 | 1747 | 7.26791827716      |
| NM_006487 | FBLN1    | 511  | 711  | 8.32236606119      |
| NM_003963 | TM4SF5   | 489  | 531  | 7.63066614688      |
| NM_003963 | TM4SF5   | 234  | 405  | 8.95259447768      |
| NM_003963 | TM4SF5   | 533  | 645  | 7.04570388208      |
| NM_014188 | SSU72    | 1187 | 1272 | 5.16746801421      |
| NM_014182 | ORMDL2   | 300  | 362  | 7.05773093721      |
| NM_080626 | BRI3BP   | 374  | 439  | 10.3390001365      |
| NM_018241 | TMEM184C |      | 1597 | 1634 6.24907493616 |
| NM_018242 | SLC47A1  | 1581 | 1648 | 7.2307212007       |
| NM_014982 | PCNX     | 397  | 434  | 6.80206904117      |
| NM_005708 | GPC6     | 1981 | 2033 | 7.58429824644      |
| NM_005708 | GPC6     | 1218 | 1259 | 9.30768770943      |
| NM_005708 | GPC6     | 1079 | 1120 | 8.58447199653      |
| NM_005708 | GPC6     | 1277 | 1325 | 10.1694277664      |
| NM_005708 | GPC6     | 1825 | 1876 | 9.16943448993      |
| NM_005708 | GPC6     | 2183 | 2229 | 8.08529528809      |
| NM_005708 | GPC6     | 2126 | 2151 | 8.08529528809      |
| NM_005700 | DPP3     | 1337 | 1359 | 7.39539950972      |
| NM_001287 | CLCN7    | 2036 | 2073 | 7.44076852251      |
| NM_001288 | CLIC1    | 635  | 670  | 3.40473115517      |
| NM_001288 | CLIC1    | 246  | 318  | 4.40473115517      |
| NM_001288 | CLIC1    | 902  | 972  | 4.08279632923      |
| NM_001288 | CLIC1    | 397  | 450  | 3.89015798212      |
| NM_001288 | CLIC1    | 59   | 106  | 2.66776556078      |

|              |          |      |      |                 |               |
|--------------|----------|------|------|-----------------|---------------|
| NM_001288    | CLIC1    | 106  | 156  | 3.66776556101   |               |
| NM_001288    | CLIC1    | 320  | 381  | 4.89015797479   |               |
| NM_001288    | CLIC1    | 709  | 807  | 3.66776556101   |               |
| NM_001288    | CLIC1    | 492  | 600  | 4.40473115517   |               |
| NM_020977    | ANK2     | 7432 | 7451 | 8.49714300167   |               |
| NM_001143852 | TCHP     | 2986 | 3008 | 6.04758351001   |               |
| NM_016176    | SDF4     | 416  | 468  | 2.6194215065    |               |
| NM_016176    | SDF4     | 790  | 835  | 5.20840137148   |               |
| NM_016176    | SDF4     | 581  | 637  | 4.43079402874   |               |
| NM_016176    | SDF4     | 1134 | 1164 | 3.20840159985   |               |
| NM_016176    | SDF4     | 1287 | 1329 | 3.94519345125   |               |
| NM_016176    | SDF4     | 170  | 219  | 4.2084016074    |               |
| NM_016176    | SDF4     | 514  | 556  | 2.62326535636   |               |
| NM_016176    | SDF4     | 1030 | 1101 | 4.2084016074    |               |
| NM_016176    | SDF4     | 646  | 752  | 5.2084016074    |               |
| NM_016176    | SDF4     | 1219 | 1284 | 3.94536719402   |               |
| NM_016176    | SDF4     | 852  | 1026 | 5.53032970229   |               |
| NM_013986    | EWSR1    | 1433 | 1480 | 5.56233710569   |               |
| NM_013986    | EWSR1    | 940  | 1009 | 3.97335701235   |               |
| NM_006516    | SLC2A1   | 1823 | 1856 | 4.9077876429    |               |
| NM_001756    | SERPINA6 |      | 745  | 806             | 7.31409167121 |
| NM_001756    | SERPINA6 |      | 1145 | 1170            | 4.90802436694 |
| NM_001756    | SERPINA6 |      | 824  | 919             | 9.74705107849 |
| NM_001756    | SERPINA6 |      | 94   | 169             | 6.57712584112 |
| NM_001756    | SERPINA6 |      | 432  | 478             | 5.98814597615 |
| NM_001756    | SERPINA6 |      | 1027 | 1081            | 7.79951849838 |
| NM_001756    | SERPINA6 |      | 561  | 602             | 7.31409167099 |
| NM_015913    | TXNDC12  | 1322 | 1375 | 6.16692378969   |               |
| NM_015913    | TXNDC12  | 1510 | 1558 | 3.58213480337   |               |
| NM_015913    | TXNDC12  | 1156 | 1213 | 3.58196128897   |               |
| NM_001134    | AFP      | 551  | 633  | 1.64586630198   |               |
| NM_001134    | AFP      | 713  | 787  | 1.6843404498    |               |
| NM_001134    | AFP      | 1336 | 1399 | 1.08026912613   |               |
| NM_001134    | AFP      | 432  | 545  | 1.86267769106   |               |
| NM_001134    | AFP      | 1414 | 1529 | 2.48080705571   |               |
| NM_001134    | AFP      | 808  | 936  | 2.54493739313   |               |
| NM_001134    | AFP      | 83   | 124  | -1.24183271908  |               |
| NM_001134    | AFP      | 144  | 192  | -0.978624562926 |               |
| NM_001134    | AFP      | 1279 | 1312 | -0.978624562926 |               |
| NM_001134    | AFP      | 1156 | 1262 | 1.99100178803   |               |
| NM_001134    | AFP      | 1117 | 1151 | -2.5635870712   |               |
| NM_001134    | AFP      | 1563 | 1702 | 2.62623749523   |               |
| NM_001134    | AFP      | 937  | 1063 | 1.5238757776    |               |
| NM_001134    | AFP      | 222  | 426  | 3.20459726113   |               |
| NM_001134    | AFP      | 1728 | 1949 | 2.89584455499   |               |
| NM_007051    | FAF1     | 342  | 382  | 5.68040028424   |               |
| NM_001135162 | COMT     | 386  | 438  | 6.41369964167   |               |
| NM_001135162 | COMT     | 441  | 468  | 6.41353262241   |               |
| NM_001135162 | COMT     | 469  | 544  | 7.87313799136   |               |
| NM_001135162 | COMT     | 858  | 889  | 4.32956716334   |               |

|              |        |      |      |                 |
|--------------|--------|------|------|-----------------|
| NM_001135162 | COMT   | 640  | 707  | 7.22106129478   |
| NM_001135162 | COMT   | 756  | 850  | 7.58363137417   |
| NM_007364    | TMED3  | 533  | 581  | 9.03120951082   |
| NM_000661    | RPL9   | 302  | 349  | 1.71400118637   |
| NM_000661    | RPL9   | 131  | 225  | 2.29896368709   |
| NM_000661    | RPL9   | 235  | 283  | -0.370138022792 |
| NM_000660    | TGFB1  | 348  | 399  | 6.95069222304   |
| NM_001042734 | SEC24B | 3313 | 3335 | 7.18611698783   |
| NM_004949    | DSC2   | 2300 | 2333 | 5.54578045661   |
| NM_178582    | HM13   | 445  | 497  | 10.9087297157   |
| NM_178582    | HM13   | 80   | 163  | 10.9087297157   |
| NM_178582    | HM13   | 377  | 417  | 8.70911328888   |
| NM_006013    | RPL10  | 354  | 402  | 2.80198863594   |
| NM_006010    | MANF   | 405  | 460  | 4.0372535716    |
| NM_006010    | MANF   | 724  | 774  | 2.95312109327   |
| NM_006010    | MANF   | 637  | 681  | 4.53808359399   |
| NM_006010    | MANF   | 467  | 518  | 4.62204905306   |
| NM_006010    | MANF   | 518  | 552  | 4.62204905306   |
| NM_006017    | PROM1  | 2469 | 2500 | 7.82450498262   |
| NM_006017    | PROM1  | 532  | 590  | 7.82852258257   |
| NM_006017    | PROM1  | 2060 | 2106 | 7.24338633175   |
| NM_006017    | PROM1  | 773  | 842  | 10.3310229233   |
| NM_006017    | PROM1  | 2192 | 2231 | 7.15942087269   |
| NM_006017    | PROM1  | 2516 | 2567 | 9.05091500413   |
| NM_006017    | PROM1  | 1218 | 1284 | 9.05091500413   |
| NM_006017    | PROM1  | 1806 | 1852 | 9.05091500413   |
| NM_006017    | PROM1  | 1690 | 1782 | 9.94399980021   |
| NM_006017    | PROM1  | 2603 | 2716 | 11.1015410772   |
| NM_006017    | PROM1  | 1555 | 1608 | 8.24356008207   |
| NM_006017    | PROM1  | 2260 | 2305 | 7.24355984615   |
| NM_006017    | PROM1  | 598  | 632  | 8.24356008206   |
| NM_006017    | PROM1  | 2323 | 2412 | 10.3310229233   |
| NM_006017    | PROM1  | 2108 | 2138 | 7.24355984615   |
| NM_006017    | PROM1  | 866  | 971  | 10.4134850835   |
| NM_006017    | PROM1  | 1337 | 1407 | 8.5654814459    |
| NM_006018    | HCAR3  | 414  | 475  | 10.7605018033   |
| NM_006019    | TCIRG1 | 183  | 224  | 8.05162375842   |
| NM_006019    | TCIRG1 | 1889 | 1927 | 10.1357562368   |
| NM_001206665 | IGSF8  | 1372 | 1425 | 8.84358150011   |
| NM_001079818 | ITGA6  | 3189 | 3224 | 5.68710053384   |
| NM_001079818 | ITGA6  | 2176 | 2225 | 6.00501775961   |
| NM_001079818 | ITGA6  | 3137 | 3165 | 6.26805216544   |
| NM_001079818 | ITGA6  | 2970 | 3010 | 5.68710726489   |
| NM_001079818 | ITGA6  | 3266 | 3294 | 6.68710702898   |
| NM_152419    | HGSNAT | 1573 | 1627 | 10.0716918304   |
| NM_018184    | ARL8B  | 159  | 216  | 7.6516170611    |
| NM_001127641 | LAMB3  | 1673 | 1731 | 14.2961726639   |
| NM_001127641 | LAMB3  | 2140 | 2176 | 13.2120401856   |
| NM_001127641 | LAMB3  | 3529 | 3591 | 12.2921617948   |
| NM_001127641 | LAMB3  | 1354 | 1413 | 12.2921617948   |



|              |         |      |      |               |
|--------------|---------|------|------|---------------|
| NM_001127641 | LAMB3   | 3479 | 3526 | 14.2921617948 |
| NM_001127641 | LAMB3   | 3047 | 3108 | 14.2961791591 |
| NM_013404    | MSLN    | 1704 | 1752 | 13.3082265965 |
| NM_013404    | MSLN    | 1805 | 1867 | 12.2240873871 |
| NM_005931    | MICB    | 395  | 422  | 9.97648576608 |
| NM_005933    | MLL     | 197  | 227  | 7.17276122517 |
| NM_018981    | DNAJC10 | 1719 | 1751 | 6.67615966939 |
| NM_018981    | DNAJC10 | 1044 | 1091 | 6.43837078366 |
| NM_018984    | SSH1    | 3381 | 3405 | 9.93120323951 |
| NM_052932    | TMEM123 | 554  | 614  | 3.27005907871 |
| NM_052932    | TMEM123 | 906  | 963  | 1.85502157921 |
| NM_080546    | SLC44A1 | 302  | 385  | 7.26354523354 |
| NM_012112    | TPX2    | 1904 | 1943 | 7.17111337057 |
| NM_012448    | STAT5B  | 1445 | 1464 | 6.85217942601 |
| NM_012449    | STEAP1  | 855  | 940  | 7.50257922305 |
| NM_004716    | PCSK7   | 115  | 137  | 9.46203591727 |
| NM_004710    | SYNGR2  | 344  | 398  | 10.0377752832 |
| NM_004710    | SYNGR2  | 537  | 593  | 8.03777528322 |
| NM_004710    | SYNGR2  | 428  | 465  | 6.95363608139 |
| NM_000416    | IFNGR1  | 1168 | 1225 | 7.37502004006 |
| NM_000416    | IFNGR1  | 754  | 774  | 5.50037717182 |
| NM_000416    | IFNGR1  | 607  | 655  | 4.9154146711  |
| NM_000416    | IFNGR1  | 672  | 702  | 6.50054419109 |
| NM_000416    | IFNGR1  | 1484 | 1509 | 6.50054419109 |
| NM_006844    | ILVBL   | 973  | 1023 | 7.93017047356 |
| NM_006844    | ILVBL   | 1254 | 1306 | 5.84603126418 |
| NM_006844    | ILVBL   | 656  | 710  | 6.93016374251 |
| NM_006844    | ILVBL   | 1785 | 1830 | 6.92999672324 |
| NM_006842    | SF3B2   | 2347 | 2414 | 4.00379395315 |
| NM_006842    | SF3B2   | 2087 | 2170 | 4.00781155332 |
| NM_006842    | SF3B2   | 1513 | 1540 | 2.00379395315 |
| NM_032595    | PPP1R9B | 1740 | 1761 | 6.14660779493 |
| NM_020360    | PLSCR3  | 259  | 282  | 11.6038855694 |
| NM_144580    | C1orf85 | 809  | 872  | 11.2828782326 |
| NM_144580    | C1orf85 | 302  | 347  | 10.5457388883 |
| NM_144580    | C1orf85 | 1028 | 1072 | 8.87681092851 |
| NM_144580    | C1orf85 | 1292 | 1336 | 9.96077638758 |
| NM_144582    | TEX261  | 15   | 46   | 5.3164885857  |
| NM_006811    | SERINC3 | 1051 | 1098 | 4.77490824042 |
| NM_006811    | SERINC3 | 1148 | 1188 | 6.43999235035 |
| NM_006811    | SERINC3 | 990  | 1047 | 7.4438362002  |
| NM_007249    | KLF12   | 5332 | 5351 | 10.2548676582 |
| NM_001012333 | MDK     | 398  | 466  | 7.88531305125 |
| NM_001012333 | MDK     | 572  | 626  | 6.42587470156 |
| NM_001012333 | MDK     | 253  | 303  | 6.23323611875 |
| NM_001012339 | DNAJC21 | 1013 | 1033 | 3.7992872977  |
| NM_001184835 | GPR64   | 72   | 99   | 13.6217117719 |
| NM_002014    | FKBP4   | 1075 | 1100 | 5.61216468506 |
| NM_003789    | TRADD   | 509  | 528  | 8.33531817968 |
| NM_001080495 | TNRC18  | 2771 | 2836 | 8.88751023447 |

|              |         |      |      |               |
|--------------|---------|------|------|---------------|
| NM_001080495 | TNRC18  | 4216 | 4262 | 7.08417290504 |
| NM_001080495 | TNRC18  | 5821 | 5854 | 6.0000337032  |
| NM_001080495 | TNRC18  | 2492 | 2538 | 8.66913517739 |
| NM_001080495 | TNRC18  | 4519 | 4543 | 6.0000337032  |
| NM_001080495 | TNRC18  | 6804 | 6862 | 8.08416618153 |
| NM_006745    | MSM01   | 730  | 782  | 8.7646592642  |
| NM_006745    | MSM01   | 927  | 954  | 7.68052005504 |
| NM_145185    | MAP2K7  | 1933 | 1958 | 5.93514032267 |
| NM_145185    | MAP2K7  | 35   | 60   | 4.9311227225  |
| NM_031311    | CPVL    | 615  | 663  | 5.15278559568 |
| NM_031311    | CPVL    | 779  | 832  | 5.63821218694 |
| NM_031311    | CPVL    | 1464 | 1513 | 5.15278559568 |
| NM_031311    | CPVL    | 263  | 372  | 4.8308575008  |
| NM_031311    | CPVL    | 1145 | 1197 | 4.41581327046 |
| NM_031311    | CPVL    | 1035 | 1108 | 6.91832034205 |
| NM_031311    | CPVL    | 915  | 995  | 5.8308575008  |
| NM_031311    | CPVL    | 444  | 559  | 7.07878501424 |
| NM_031311    | CPVL    | 1251 | 1351 | 6.29028911943 |
| NM_031311    | CPVL    | 851  | 909  | 6.29028911943 |
| NM_001417    | EIF4B   | 694  | 722  | 1.23176078329 |
| NM_014616    | ATP11B  | 4825 | 4845 | 7.26365391841 |
| NM_014613    | FAF2    | 755  | 799  | 7.94622706721 |
| NM_005896    | IDH1    | 1109 | 1156 | 3.23018260914 |
| NM_001410    | MEGF8   | 4771 | 4820 | 10.5903913693 |
| NM_001410    | MEGF8   | 7456 | 7513 | 8.59039136929 |
| NM_001410    | MEGF8   | 8604 | 8638 | 11.17535387   |
| NM_001410    | MEGF8   | 3789 | 3858 | 10.6745303428 |
| NM_052899    | GPRIN1  | 56   | 87   | 13.493873399  |
| NM_005765    | ATP6AP2 | 813  | 844  | 7.63584301662 |
| NM_005765    | ATP6AP2 | 211  | 246  | 6.39804740006 |
| NM_005765    | ATP6AP2 | 630  | 669  | 6.98301662429 |
| NM_005765    | ATP6AP2 | 1032 | 1065 | 8.12126984379 |
| NM_005765    | ATP6AP2 | 729  | 801  | 7.719982226   |
| NM_005762    | TRIM28  | 2823 | 2889 | 5.7210954902  |
| NM_005762    | TRIM28  | 2650 | 2681 | 5.63696301187 |
| NM_005762    | TRIM28  | 1456 | 1507 | 6.45405021525 |
| NM_005762    | TRIM28  | 2390 | 2455 | 6.71708462108 |
| NM_005762    | TRIM28  | 2225 | 2301 | 7.13613972053 |
| NM_176895    | PPAP2A  | 1084 | 1113 | 10.8336148944 |
| NM_176895    | PPAP2A  | 1124 | 1167 | 9.59180840872 |
| NM_176895    | PPAP2A  | 994  | 1052 | 10.0966493002 |
| NM_033643    | RPL36   | 87   | 143  | 3.23627869236 |
| NM_033643    | RPL36   | 357  | 418  | 1.99848979931 |
| NM_001077261 | NCOR2   | 218  | 241  | 6.10827339474 |
| NM_001735    | C5      | 2720 | 2747 | 4.28248332089 |
| NM_001735    | C5      | 2174 | 2237 | 4.94756743082 |
| NM_001733    | C1R     | 471  | 500  | 12.3828729283 |
| NM_001733    | C1R     | 282  | 329  | 9.9768056316  |
| NM_001733    | C1R     | 2123 | 2183 | 12.868299763  |
| NM_001733    | C1R     | 901  | 939  | 9.9768056316  |

|              |          |      |      |                  |
|--------------|----------|------|------|------------------|
| NM_001733    | C1R      | 1801 | 1835 | 12.3828662048    |
| NM_001733    | C1R      | 836  | 869  | 10.0607710907    |
| NM_000065    | C6       | 705  | 743  | 11.7463440899    |
| NM_000065    | C6       | 1920 | 1951 | 13.7463440899    |
| NM_000065    | C6       | 1676 | 1717 | 14.553872762     |
| NM_000065    | C6       | 2598 | 2647 | 12.74250024      |
| NM_000065    | C6       | 2295 | 2370 | 13.3314736098    |
| NM_000064    | C3       | 4904 | 5022 | 4.89095807545    |
| NM_000064    | C3       | 5    | 73   | 4.16967410352    |
| NM_000064    | C3       | 254  | 320  | 4.28214883278    |
| NM_000064    | C3       | 3888 | 3977 | 4.35253816067    |
| NM_000064    | C3       | 4823 | 4864 | 1.76757565995    |
| NM_000064    | C3       | 4085 | 4150 | 2.41965235653    |
| NM_000064    | C3       | 1100 | 1124 | -1.03977949803   |
| NM_000064    | C3       | 4157 | 4252 | 2.8671113335     |
| NM_000064    | C3       | 4865 | 4903 | 1.68343645056    |
| NM_000064    | C3       | 3983 | 4049 | 3.60407692766    |
| NM_000064    | C3       | 4267 | 4327 | 4.20814825133    |
| NM_000064    | C3       | 3760 | 3866 | 4.91441704828    |
| NM_000064    | C3       | 3572 | 3756 | 4.93750066139    |
| NM_000064    | C3       | 2612 | 3219 | 7.03168310045    |
| NM_000064    | C3       | 3234 | 3410 | 5.15004529677    |
| NM_000064    | C3       | 1011 | 1099 | 3.60407692766    |
| NM_000064    | C3       | 5024 | 5087 | -0.0437968622831 |
| NM_000064    | C3       | 87   | 254  | 4.74158045141    |
| NM_000064    | C3       | 455  | 1008 | 6.74158045141    |
| NM_000064    | C3       | 1154 | 2295 | 7.78994347298    |
| NM_000064    | C3       | 4341 | 4817 | 6.90858796947    |
| NM_000064    | C3       | 3432 | 3540 | 3.60407692766    |
| NM_000064    | C3       | 2303 | 2612 | 6.36110017417    |
| NM_000064    | C3       | 341  | 446  | 2.66066045603    |
| NM_001397    | ECE1     | 1877 | 1937 | 7.27552107967    |
| NM_001397    | ECE1     | 4988 | 5026 | 6.86946050645    |
| NM_001397    | ECE1     | 614  | 663  | 6.45442300717    |
| NM_001397    | ECE1     | 2192 | 2227 | 5.86946050645    |
| NM_001397    | ECE1     | 992  | 1017 | 4.95342596552    |
| NM_001397    | ECE1     | 1248 | 1292 | 5.95342596552    |
| NM_024104    | C19orf42 |      | 18   | 99 8.75721888302 |
| NM_024105    | ALG12    | 908  | 973  | 6.37969302671    |
| NM_000607    | ORM1     | 319  | 393  | 4.99266530616    |
| NM_000607    | ORM1     | 397  | 799  | 7.72201771621    |
| NM_000607    | ORM1     | 246  | 309  | 3.0666658876     |
| NM_000608    | ORM2     | 320  | 386  | 4.46181021077    |
| NM_000608    | ORM2     | 407  | 469  | 3.94723703794    |
| NM_000608    | ORM2     | 481  | 626  | 6.94723703794    |
| NM_000608    | ORM2     | 251  | 314  | 4.13988211589    |
| NM_000608    | ORM2     | 635  | 828  | 6.30980711733    |
| NM_017645    | HAUS6    | 799  | 817  | 6.41698072028    |
| NM_182895    | SCARF2   | 1925 | 1946 | 13.5062983449    |
| NM_001042432 | CLN3     | 351  | 386  | 9.22970961129    |

|              |         |      |      |               |
|--------------|---------|------|------|---------------|
| NM_001042432 | CLN3    | 692  | 740  | 7.22970961129 |
| NM_001042432 | CLN3    | 1169 | 1223 | 10.4036522129 |
| NM_001042432 | CLN3    | 614  | 684  | 11.5556553064 |
| NM_001042432 | CLN3    | 1405 | 1517 | 11.0410821335 |
| NM_145648    | SLC15A4 | 987  | 1039 | 7.70973719756 |
| NM_145648    | SLC15A4 | 1280 | 1321 | 9.70589334771 |
| NM_145648    | SLC15A4 | 104  | 132  | 8.70589334771 |
| NM_003004    | SECTM1  | 858  | 899  | 9.63961634831 |
| NM_153182    | MINA    | 3732 | 3753 | 6.85755629316 |
| NM_002355    | M6PR    | 554  | 641  | 6.62883221197 |
| NM_002355    | M6PR    | 289  | 335  | 5.04788058037 |
| NM_002355    | M6PR    | 719  | 761  | 6.63284957623 |
| NM_002355    | M6PR    | 443  | 482  | 7.36980867526 |
| NM_002354    | EPCAM   | 623  | 677  | 5.65360898756 |
| NM_002354    | EPCAM   | 1306 | 1390 | 5.43121656623 |
| NM_002354    | EPCAM   | 695  | 805  | 7.14393461415 |
| NM_002354    | EPCAM   | 377  | 417  | 3.1771523554  |
| NM_002354    | EPCAM   | 180  | 255  | 3.26129155724 |
| NM_002354    | EPCAM   | 928  | 1017 | 6.06864648684 |
| NM_002354    | EPCAM   | 1037 | 1298 | 7.43121656623 |
| NM_002354    | EPCAM   | 808  | 890  | 5.96173128293 |
| NM_002354    | EPCAM   | 428  | 504  | 3.58321965967 |
| NM_014287    | NOM01   | 319  | 412  | 5.34798892902 |
| NM_014287    | NOM01   | 2269 | 2307 | 2.76285267798 |
| NM_014287    | NOM01   | 2769 | 2847 | 5.34798892902 |
| NM_014287    | NOM01   | 1589 | 1629 | 4.34798892902 |
| NM_014287    | NOM01   | 1687 | 1735 | 4.7630264283  |
| NM_014287    | NOM01   | 2992 | 3044 | 4.7630264283  |
| NM_014287    | NOM01   | 704  | 752  | 5.08495452319 |
| NM_014287    | NOM01   | 2568 | 2657 | 5.34798892902 |
| NM_014287    | NOM01   | 2007 | 2051 | 5.08495452319 |
| NM_014287    | NOM01   | 1736 | 1810 | 6.22245804694 |
| NM_014287    | NOM01   | 1814 | 1847 | 2.76301969725 |
| NM_014287    | NOM01   | 1377 | 1430 | 4.7630264283  |
| NM_014287    | NOM01   | 956  | 1016 | 5.7630264283  |
| NM_014287    | NOM01   | 1459 | 1516 | 5.34798892902 |
| NM_014287    | NOM01   | 3239 | 3297 | 4.34798892902 |
| NM_014287    | NOM01   | 3070 | 3120 | 6.57038135036 |
| NM_014287    | NOM01   | 1879 | 1914 | 5.34798892902 |
| NM_014287    | NOM01   | 3823 | 3917 | 4.76301969725 |
| NM_014287    | NOM01   | 154  | 222  | 5.7630264283  |
| NM_014287    | NOM01   | 4008 | 4068 | 4.34397132885 |
| NM_014287    | NOM01   | 2091 | 2186 | 6.22245804694 |
| NM_014287    | NOM01   | 781  | 821  | 4.76285267798 |
| NM_014287    | NOM01   | 2310 | 2390 | 6.22245804694 |
| NM_014287    | NOM01   | 2474 | 2537 | 4.7630264283  |
| NM_014287    | NOM01   | 2854 | 2923 | 4.34798892902 |
| NM_014287    | NOM01   | 588  | 639  | 3.75900882813 |
| NM_014287    | NOM01   | 233  | 315  | 4.7630264283  |
| NM_014287    | NOM01   | 892  | 953  | 5.57038135036 |

|              |         |      |      |                 |
|--------------|---------|------|------|-----------------|
| NM_014287    | NOM01   | 432  | 463  | 2.75900882813   |
| NM_014287    | NOM01   | 1517 | 1575 | 3.76302642808   |
| NM_014287    | NOM01   | 3539 | 3578 | 2.67888721892   |
| NM_014287    | NOM01   | 3361 | 3423 | 5.7630264283    |
| NM_014287    | NOM01   | 13   | 78   | 2.76301969725   |
| NM_018703    | RBBP6   | 329  | 359  | 4.31481443104   |
| NM_001077690 | ALG9    | 544  | 617  | 10.0595234264   |
| NM_002648    | PIM1    | 77   | 102  | 5.35258362132   |
| NM_001032999 | CBFA2T2 | 120  | 139  | 5.12629988038   |
| NM_014860    | SUPT7L  | 1523 | 1542 | 6.95074659637   |
| NM_012426    | SF3B3   | 2209 | 2264 | 5.65858839638   |
| NM_012423    | RPL13A  | 309  | 341  | 1.44798216332   |
| NM_012423    | RPL13A  | 579  | 645  | 1.44798889437   |
| NM_012423    | RPL13A  | 648  | 718  | 1.44798888683   |
| NM_012423    | RPL13A  | 410  | 483  | 1.12204319932   |
| NM_182531    | ZNF778  | 2607 | 2627 | 9.23844445684   |
| NM_001073    | UGT2B11 | 1003 | 1031 | 10.8694351177   |
| NM_001073    | UGT2B11 | 1047 | 1079 | 9.64704269632   |
| NM_001073    | UGT2B11 | 902  | 941  | 8.06190644529   |
| NM_001075    | UGT2B10 | 842  | 877  | 5.49098761585   |
| NM_001075    | UGT2B10 | 891  | 955  | 5.49098785177   |
| NM_001074    | UGT2B7  | 1407 | 1451 | 5.82962112942   |
| NM_001074    | UGT2B7  | 780  | 812  | 6.82962112942   |
| NM_001074    | UGT2B7  | 1043 | 1078 | 8.15556682448   |
| NM_001074    | UGT2B7  | 685  | 715  | 6.82962112942   |
| NM_001074    | UGT2B7  | 1511 | 1563 | 5.83363872959   |
| NM_001074    | UGT2B7  | 1261 | 1295 | 7.41842748      |
| NM_001074    | UGT2B7  | 475  | 533  | 8.15556009343   |
| NM_001074    | UGT2B7  | 901  | 976  | 8.15556682448   |
| NM_001135820 | TMEM2   | 2863 | 2906 | 6.87220017267   |
| NM_001135820 | TMEM2   | 2757 | 2798 | 7.54130188277   |
| NM_001135820 | TMEM2   | 2652 | 2676 | 6.28723767195   |
| NM_001135820 | TMEM2   | 1203 | 1234 | 6.37137015028   |
| NM_001135820 | TMEM2   | 3186 | 3227 | 6.68928737605   |
| NM_001135820 | TMEM2   | 2007 | 2068 | 6.36735928116   |
| NM_001135820 | TMEM2   | 2298 | 2361 | 5.37137664542   |
| NM_001135820 | TMEM2   | 408  | 497  | 7.17471420322   |
| NM_001135820 | TMEM2   | 1530 | 1622 | 7.54130188278   |
| NM_001135820 | TMEM2   | 3898 | 3966 | 5.95633938205   |
| NM_001135820 | TMEM2   | 1764 | 1863 | 6.95633938206   |
| NM_001135821 | FDPS    | 616  | 669  | 5.23627336696   |
| NM_001135821 | FDPS    | 855  | 886  | 4.56717165708   |
| NM_001135821 | FDPS    | 420  | 464  | 3.56717165708   |
| NM_000477    | ALB     | 2039 | 2073 | -1.56788007924  |
| NM_000477    | ALB     | 97   | 343  | 2.90460769977   |
| NM_000477    | ALB     | 1940 | 2007 | -0.567880071688 |
| NM_000477    | ALB     | 14   | 69   | -2.30886326603  |
| NM_000477    | ALB     | 343  | 1928 | 6.30740852653   |
| NM_016255    | FAM8A1  | 1209 | 1253 | 10.7258128318   |
| NM_016256    | NAGPA   | 1037 | 1161 | 8.70490474906   |

|           |          |      |      |               |                |
|-----------|----------|------|------|---------------|----------------|
| NM_032017 | STK40    | 35   | 69   | 5.16261997603 |                |
| NM_000295 | SERPINA1 |      | 1664 | 1720          | 1.5435612815   |
| NM_000295 | SERPINA1 |      | 478  | 898           | 7.18841544536  |
| NM_000295 | SERPINA1 |      | 182  | 218           | 0.301754795825 |
| NM_000295 | SERPINA1 |      | 902  | 1428          | 7.49559695488  |
| NM_000295 | SERPINA1 |      | 225  | 439           | 5.305772396    |
| NM_000295 | SERPINA1 |      | 1484 | 1614          | 3.305772396    |
| NM_001619 | ADRBK1   | 212  | 245  | 5.72300263531 |                |
| NM_002032 | FTH1     | 416  | 558  | 2.75988679446 |                |
| NM_002032 | FTH1     | 69   | 189  | 2.39731671507 |                |
| NM_203472 | SELS     | 432  | 477  | 2.81132847805 |                |
| NM_203472 | SELS     | 597  | 644  | 4.39227338615 |                |
| NM_203472 | SELS     | 552  | 587  | 4.80731088543 |                |
| NM_203472 | SELS     | 1191 | 1236 | 5.39629098632 |                |
| NM_004285 | H6PD     | 2112 | 2148 | 10.4814239046 |                |
| NM_004285 | H6PD     | 826  | 893  | 10.3972847028 |                |
| NM_006196 | PCBP1    | 291  | 330  | 4.43239957367 |                |
| NM_207342 | STEAP1B  | 826  | 883  | 8.78482068312 |                |
| NM_005567 | LGALS3BP |      | 1300 | 1343          | 7.18462041144  |
| NM_005567 | LGALS3BP |      | 184  | 268           | 4.27772981583  |
| NM_005567 | LGALS3BP |      | 1916 | 1985          | 7.52565732928  |
| NM_005567 | LGALS3BP |      | 1503 | 1552          | 4.27772980828  |
| NM_005567 | LGALS3BP |      | 1391 | 1464          | 5.8626855855   |
| NM_005567 | LGALS3BP |      | 567  | 692           | 6.86269231655  |
| NM_005567 | LGALS3BP |      | 1616 | 1734          | 7.27772981583  |
| NM_005567 | LGALS3BP |      | 1988 | 2027          | 4.27371221566  |
| NM_005567 | LGALS3BP |      | 1130 | 1218          | 7.52565732928  |
| NM_005567 | LGALS3BP |      | 752  | 906           | 8.27772981583  |
| NM_005567 | LGALS3BP |      | 916  | 1067          | 7.52565732928  |
| NM_005567 | LGALS3BP |      | 56   | 124           | 6.27772981583  |
| NM_005567 | LGALS3BP |      | 1230 | 1297          | 4.27772957991  |
| NM_005567 | LGALS3BP |      | 420  | 542           | 6.59965791072  |
| NM_005567 | LGALS3BP |      | 302  | 419           | 7.67004723861  |
| NM_005567 | LGALS3BP |      | 1739 | 1831          | 7.44765481727  |
| NM_005564 | LCN2     | 213  | 274  | 13.4572741724 |                |
| NM_005564 | LCN2     | 287  | 394  | 15.3901599766 |                |
| NM_005564 | LCN2     | 52   | 213  | 14.4572741724 |                |
| NM_005564 | LCN2     | 520  | 681  | 15.9978425538 |                |
| NM_005563 | STMN1    | 563  | 620  | 2.91280272593 |                |
| NM_005561 | LAMP1    | 1337 | 1468 | 8.61675862553 |                |
| NM_005561 | LAMP1    | 1128 | 1171 | 5.75877762285 |                |
| NM_005561 | LAMP1    | 143  | 177  | 3.67463842102 |                |
| NM_005561 | LAMP1    | 759  | 823  | 7.84624047165 |                |
| NM_005561 | LAMP1    | 501  | 583  | 8.00670514385 |                |
| NM_005561 | LAMP1    | 1553 | 1631 | 5.75877739448 |                |
| NM_005561 | LAMP1    | 1064 | 1127 | 7.45921734854 |                |
| NM_005561 | LAMP1    | 1468 | 1519 | 6.92870263185 |                |
| NM_005561 | LAMP1    | 1953 | 2008 | 7.21820924904 |                |
| NM_005561 | LAMP1    | 218  | 279  | 5.34356638081 |                |
| NM_005561 | LAMP1    | 836  | 866  | 4.75860388009 |                |

|           |       |       |       |               |
|-----------|-------|-------|-------|---------------|
| NM_005561 | LAMP1 | 371   | 501   | 8.45921734854 |
| NM_005561 | LAMP1 | 912   | 1056  | 9.71297394079 |
| NM_005561 | LAMP1 | 2367  | 2500  | 8.28233958646 |
| NM_005561 | LAMP1 | 1199  | 1288  | 7.45921734854 |
| NM_005561 | LAMP1 | 1759  | 1879  | 6.34374013112 |
| NM_005561 | LAMP1 | 607   | 734   | 9.43120297237 |
| NM_005560 | LAMA5 | 6845  | 6932  | 8.69168676931 |
| NM_005560 | LAMA5 | 8438  | 8481  | 8.95455415588 |
| NM_005560 | LAMA5 | 727   | 769   | 9.53968367587 |
| NM_005560 | LAMA5 | 1957  | 2004  | 8.28562619609 |
| NM_005560 | LAMA5 | 10271 | 10314 | 6.36574780531 |
| NM_005560 | LAMA5 | 1638  | 1680  | 6.36574780531 |
| NM_005560 | LAMA5 | 4145  | 4197  | 8.28562619609 |
| NM_005560 | LAMA5 | 9205  | 9258  | 8.95472767028 |
| NM_005560 | LAMA5 | 1423  | 1460  | 7.95455415588 |
| NM_005560 | LAMA5 | 9895  | 9941  | 7.95071030603 |
| NM_005560 | LAMA5 | 9615  | 9651  | 7.28562619609 |
| NM_005560 | LAMA5 | 1697  | 1739  | 8.95472117515 |
| NM_005560 | LAMA5 | 2499  | 2533  | 6.36959165516 |
| NM_005560 | LAMA5 | 4448  | 4508  | 7.95455415588 |
| NM_005560 | LAMA5 | 9455  | 9500  | 7.95071030603 |
| NM_005560 | LAMA5 | 8755  | 8804  | 7.28562619609 |
| NM_005560 | LAMA5 | 1504  | 1610  | 7.36975867443 |
| NM_005560 | LAMA5 | 6193  | 6229  | 8.36574780531 |
| NM_005560 | LAMA5 | 2563  | 2618  | 7.36975867443 |
| NM_005560 | LAMA5 | 10522 | 10576 | 9.17712009162 |
| NM_002291 | LAMB1 | 1386  | 1451  | 6.4801907915  |
| NM_002291 | LAMB1 | 4950  | 4992  | 5.39605158212 |
| NM_002291 | LAMB1 | 4352  | 4444  | 6.7602987107  |
| NM_002291 | LAMB1 | 1842  | 1887  | 4.99476396433 |
| NM_002291 | LAMB1 | 3500  | 3557  | 2.67283586945 |
| NM_002291 | LAMB1 | 827   | 877   | 5.25779836994 |
| NM_002291 | LAMB1 | 3185  | 3229  | 5.84276087089 |
| NM_002291 | LAMB1 | 2942  | 3010  | 4.99476396433 |
| NM_002291 | LAMB1 | 5190  | 5254  | 3.67282913839 |
| NM_002291 | LAMB1 | 899   | 931   | 5.25762461985 |
| NM_002291 | LAMB1 | 5279  | 5314  | 2.66881826927 |
| NM_002291 | LAMB1 | 4204  | 4258  | 4.67282913839 |
| NM_002291 | LAMB1 | 1937  | 1967  | 4.99459021401 |
| NM_002291 | LAMB1 | 1619  | 1666  | 4.25378076999 |
| NM_002291 | LAMB1 | 658   | 699   | 4.66881826927 |
| NM_002291 | LAMB1 | 1280  | 1310  | 4.66881826927 |
| NM_002291 | LAMB1 | 2712  | 2785  | 6.37327558759 |
| NM_002291 | LAMB1 | 952   | 979   | 4.25762461985 |
| NM_002291 | LAMB1 | 1690  | 1728  | 4.25779837016 |
| NM_002291 | LAMB1 | 3673  | 3767  | 6.13226748808 |
| NM_002291 | LAMB1 | 2865  | 2923  | 5.67266211913 |
| NM_002291 | LAMB1 | 2405  | 2428  | 3.67266211913 |
| NM_002291 | LAMB1 | 5389  | 5421  | 3.67283563353 |
| NM_002291 | LAMB1 | 4810  | 4846  | 4.58869666006 |

|           |       |      |      |               |
|-----------|-------|------|------|---------------|
| NM_002291 | LAMB1 | 1170 | 1237 | 4.6728358619  |
| NM_002291 | LAMB1 | 1497 | 1572 | 5.84276087089 |
| NM_002291 | LAMB1 | 3969 | 4008 | 5.67266211913 |
| NM_002291 | LAMB1 | 745  | 825  | 6.92076338289 |
| NM_002291 | LAMB1 | 4600 | 4703 | 4.99476396433 |
| NM_002291 | LAMB1 | 3878 | 3920 | 4.99074636416 |
| NM_002291 | LAMB1 | 3345 | 3453 | 6.4801907915  |
| NM_002292 | LAMB2 | 2379 | 2417 | 6.86255864084 |
| NM_002292 | LAMB2 | 3711 | 3752 | 3.77841943146 |
| NM_002293 | LAMC1 | 2636 | 2707 | 6.17152931803 |
| NM_002293 | LAMC1 | 1077 | 1106 | 3.58656680976 |
| NM_002293 | LAMC1 | 4921 | 4956 | 4.17135556771 |
| NM_002293 | LAMC1 | 2910 | 2951 | 4.90848818114 |
| NM_002293 | LAMC1 | 3889 | 3920 | 4.17152931781 |
| NM_002293 | LAMC1 | 3237 | 3301 | 5.39392173937 |
| NM_002293 | LAMC1 | 3614 | 3668 | 6.58656681731 |
| NM_002293 | LAMC1 | 427  | 499  | 5.9084949122  |
| NM_002293 | LAMC1 | 1997 | 2097 | 5.17152931803 |
| NM_002293 | LAMC1 | 2776 | 2841 | 5.17152258698 |
| NM_002293 | LAMC1 | 1132 | 1160 | 5.17152258698 |
| NM_002293 | LAMC1 | 4691 | 4727 | 4.17152258698 |
| NM_002293 | LAMC1 | 1490 | 1566 | 6.39392173914 |
| NM_002293 | LAMC1 | 4365 | 4415 | 3.58656680976 |
| NM_002293 | LAMC1 | 3422 | 3460 | 5.58656008626 |
| NM_002293 | LAMC1 | 1292 | 1371 | 5.39392173937 |
| NM_002293 | LAMC1 | 365  | 397  | 3.58656008626 |
| NM_002293 | LAMC1 | 2961 | 3067 | 7.39392173937 |
| NM_002293 | LAMC1 | 2435 | 2472 | 3.58656008626 |
| NM_002293 | LAMC1 | 4600 | 4645 | 5.50242760792 |
| NM_002293 | LAMC1 | 2483 | 2531 | 2.50242760792 |
| NM_002293 | LAMC1 | 1187 | 1213 | 5.17152258698 |
| NM_002293 | LAMC1 | 1884 | 1957 | 4.58656680976 |
| NM_002293 | LAMC1 | 2558 | 2629 | 4.9084949122  |
| NM_002293 | LAMC1 | 4037 | 4159 | 5.39392173937 |
| NM_002293 | LAMC1 | 2843 | 2882 | 2.58254921714 |
| NM_002293 | LAMC1 | 2155 | 2307 | 6.58656681731 |
| NM_002293 | LAMC1 | 4168 | 4218 | 4.58656681709 |
| NM_002293 | LAMC1 | 1388 | 1469 | 5.75649181875 |
| NM_002293 | LAMC1 | 1810 | 1867 | 5.58656681731 |
| NM_002293 | LAMC1 | 3130 | 3223 | 4.58656681731 |
| NM_002296 | LBR   | 1175 | 1208 | 10.4643044524 |
| NM_002296 | LBR   | 823  | 872  | 9.97887761765 |
| NM_002296 | LBR   | 1005 | 1069 | 9.24191179512 |
| NM_002296 | LBR   | 1947 | 1994 | 10.241912031  |
| NM_002296 | LBR   | 1636 | 1684 | 9.46429772132 |
| NM_002296 | LBR   | 1083 | 1137 | 7.6569492944  |
| NM_002296 | LBR   | 721  | 820  | 9.65694953031 |
| NM_002296 | LBR   | 1209 | 1278 | 7.65694279926 |
| NM_002296 | LBR   | 1762 | 1797 | 7.57281032093 |
| NM_002296 | LBR   | 1485 | 1566 | 9.24191203104 |



|              |              |      |      |                    |
|--------------|--------------|------|------|--------------------|
| NM_024006    | VKORC1       | 588  | 628  | 7.54375551641      |
| NM_024006    | VKORC1       | 397  | 458  | 6.73639386331      |
| NM_024006    | VKORC1       | 507  | 586  | 8.4368403125       |
| NM_014495    | ANGPTL3      | 946  | 1010 | 9.36154197798      |
| NM_052876    | NACC1        | 3971 | 4005 | 9.31563913205      |
| NM_005742    | PDIA6        | 483  | 590  | 2.9219730579       |
| NM_005742    | PDIA6        | 136  | 227  | 3.50693555862      |
| NM_005742    | PDIA6        | 862  | 955  | 3.72932797996      |
| NM_005742    | PDIA6        | 1704 | 1750 | -0.747128652206    |
| NM_005742    | PDIA6        | 766  | 813  | 2.14436547923      |
| NM_005742    | PDIA6        | 606  | 762  | 4.50693555862      |
| NM_005742    | PDIA6        | 1297 | 1462 | 4.03745027532      |
| NM_005742    | PDIA6        | 971  | 1209 | 5.46629357412      |
| NM_005742    | PDIA6        | 257  | 317  | 1.33683680686      |
| NM_005744    | ARIH1        | 541  | 577  | 7.08362804103      |
| NM_005744    | ARIH1        | 478  | 526  | 5.76152619583      |
| NM_032312    | YIPF4        | 902  | 956  | 7.33081856203      |
| NM_022152    | TMBIM1       | 352  | 401  | 6.12080150665      |
| NM_022152    | TMBIM1       | 510  | 581  | 5.70575751224      |
| NM_022152    | TMBIM1       | 797  | 852  | 5.70576424307      |
| NM_022157    | RRAGC        | 37   | 58   | 8.5036158859       |
| NM_022157    | RRAGC        | 72   | 102  | 6.91865338518      |
| NM_021139    | UGT2B4       | 1408 | 1452 | 9.27930108294      |
| NM_021139    | UGT2B4       | 906  | 996  | 10.3987959005      |
| NM_021139    | UGT2B4       | 480  | 510  | 9.02011052696      |
| NM_021139    | UGT2B4       | 511  | 543  | 9.28331195206      |
| NM_021139    | UGT2B4       | 756  | 837  | 9.28331868311      |
| NM_021139    | UGT2B4       | 306  | 364  | 9.28331868311      |
| NM_021139    | UGT2B4       | 1044 | 1117 | 11.157787801       |
| NM_021139    | UGT2B4       | 724  | 746  | 6.61421697301      |
| NM_021139    | UGT2B4       | 1242 | 1298 | 9.50571110445      |
| NM_021139    | UGT2B4       | 1582 | 1622 | 8.69834945134      |
| NM_021139    | UGT2B4       | 841  | 900  | 8.69835618239      |
| NM_021139    | UGT2B4       | 1515 | 1566 | 9.86828118383      |
| NM_021139    | UGT2B4       | 594  | 666  | 6.69835618239      |
| NM_021139    | UGT2B4       | 161  | 223  | 8.28331868289      |
| NM_016134    | PGCP         | 487  | 524  | 5.0937873133       |
| NM_016134    | PGCP         | 1158 | 1228 | 6.49985461757      |
| NM_013943    | CLIC4        | 438  | 470  | 4.71524599911      |
| NM_016133    | INSIG2       | 26   | 104  | 3.84854486044      |
| NM_016139    | CHCHD2       | 265  | 304  | 7.0668266273       |
| NM_170776    | GPR97        | 456  | 476  | 8.69649737024      |
| NM_001040158 | H2AFY        | 376  | 420  | 5.13647589804      |
| NM_001177643 | DAG1         | 5388 | 5444 | 9.1346569793       |
| NM_001177643 | DAG1         | 1014 | 1045 | 7.46572901951      |
| NM_138368    | DKFZp761E198 |      | 4836 | 4855 11.8757566823 |
| NM_001710    | CFB          | 1384 | 1453 | 4.1992396538       |
| NM_001710    | CFB          | 438  | 488  | 2.877311323        |
| NM_001710    | CFB          | 1801 | 1843 | 4.46227382372      |
| NM_001710    | CFB          | 1475 | 1514 | 4.87731155892      |

|              |          |      |      |                |               |
|--------------|----------|------|------|----------------|---------------|
| NM_001710    | CFB      | 1977 | 2034 | 5.57775127706  |               |
| NM_001710    | CFB      | 885  | 930  | 4.46227405964  |               |
| NM_001710    | CFB      | 580  | 615  | 3.46227405209  |               |
| NM_001710    | CFB      | 1094 | 1138 | 2.79317234953  |               |
| NM_001710    | CFB      | 651  | 737  | 5.57775127706  |               |
| NM_001710    | CFB      | 496  | 580  | 3.87730482786  |               |
| NM_001710    | CFB      | 1003 | 1088 | 5.33674317755  |               |
| NM_001710    | CFB      | 1862 | 1932 | 3.8771378086   |               |
| NM_001710    | CFB      | 2425 | 2459 | 3.46210030932  |               |
| NM_001710    | CFB      | 1675 | 1787 | 4.19923964625  |               |
| NM_001207014 | SERPINH1 |      | 703  | 779            | 7.13218847106 |
| NM_001207014 | SERPINH1 |      | 1281 | 1327           | 4.80624277622 |
| NM_001207014 | SERPINH1 |      | 881  | 933            | 6.3950491268  |
| NM_001207014 | SERPINH1 |      | 1366 | 1399           | 7.13201472096 |
| NM_000046    | ARSB     | 1835 | 1873 | 5.728544702    |               |
| NM_000042    | APOH     | 554  | 584  | 3.75043392814  |               |
| NM_000042    | APOH     | 339  | 373  | 3.9432527564   |               |
| NM_000042    | APOH     | 1037 | 1091 | 2.52821524957  |               |
| NM_000042    | APOH     | 251  | 301  | 5.11317775784  |               |
| NM_000042    | APOH     | 613  | 654  | 3.26518085128  |               |
| NM_000042    | APOH     | 962  | 994  | 3.26116325112  |               |
| NM_000042    | APOH     | 373  | 486  | 5.52821525712  |               |
| NM_000042    | APOH     | 751  | 831  | 3.52821525712  |               |
| NM_000041    | APOE     | 572  | 620  | 3.20951205495  |               |
| NM_000041    | APOE     | 514  | 572  | 1.92939740471  |               |
| NM_000041    | APOE     | 19   | 59   | 1.70683796411  |               |
| NM_000041    | APOE     | 1016 | 1094 | 3.29197421515  |               |
| NM_000041    | APOE     | 67   | 126  | 3.64561116976  |               |
| NM_000041    | APOE     | 659  | 695  | 1.12204897778  |               |
| NM_000041    | APOE     | 273  | 506  | 5.91646508005  |               |
| NM_000041    | APOE     | 886  | 1001 | 3.44397730859  |               |
| NM_000041    | APOE     | 137  | 202  | 0.122049206154 |               |
| NM_000041    | APOE     | 696  | 872  | 4.95493922787  |               |
| NM_000041    | APOE     | 207  | 272  | 2.1220492137   |               |
| NM_000598    | IGFBP3   | 955  | 988  | 5.72789012943  |               |
| NM_000598    | IGFBP3   | 2192 | 2237 | 5.98708068541  |               |
| NM_000598    | IGFBP3   | 187  | 254  | 5.99109804966  |               |
| NM_000598    | IGFBP3   | 531  | 585  | 4.98708068541  |               |
| NM_000598    | IGFBP3   | 915  | 948  | 3.40211818469  |               |
| NM_000598    | IGFBP3   | 1019 | 1073 | 4.40596203454  |               |
| NM_001198569 | ATP6V0C  | 398  | 438  | 4.71977960417  |               |
| NM_001198569 | ATP6V0C  | 905  | 941  | 3.1309732536   |               |
| NM_001198569 | ATP6V0C  | 455  | 560  | 6.13499085377  |               |
| NM_016395    | PTPLAD1  | 204  | 268  | 6.54158807953  |               |
| NM_016395    | PTPLAD1  | 1053 | 1082 | 5.66711896162  |               |
| NM_016395    | PTPLAD1  | 776  | 821  | 6.88951138296  |               |
| NM_016395    | PTPLAD1  | 868  | 921  | 5.40408455579  |               |
| NM_016395    | PTPLAD1  | 611  | 686  | 7.0821564609   |               |
| NM_016395    | PTPLAD1  | 930  | 1006 | 7.54158807954  |               |
| NM_016395    | PTPLAD1  | 1171 | 1216 | 3.07813886073  |               |

|              |           |      |      |               |               |
|--------------|-----------|------|------|---------------|---------------|
| NM_178812    | MTDH      | 874  | 941  | 7.80292957322 |               |
| NM_178812    | MTDH      | 941  | 989  | 9.24350216461 |               |
| NM_178812    | MTDH      | 1846 | 1875 | 6.4963979425  |               |
| NM_178812    | MTDH      | 1274 | 1391 | 8.6960143693  |               |
| NM_178812    | MTDH      | 1879 | 1940 | 6.57651955171 |               |
| NM_178812    | MTDH      | 395  | 433  | 6.99155705099 |               |
| NM_178812    | MTDH      | 1396 | 1438 | 5.99556792011 |               |
| NM_178812    | MTDH      | 1167 | 1209 | 6.91143544178 |               |
| NM_178812    | MTDH      | 1450 | 1560 | 8.4550062698  |               |
| NM_178812    | MTDH      | 604  | 760  | 8.99557465116 |               |
| NM_178819    | AGPAT6    | 2157 | 2221 | 5.25154775378 |               |
| NM_003246    | THBS1     | 668  | 737  | 10.7087542563 |               |
| NM_003246    | THBS1     | 951  | 1001 | 9.75455794593 |               |
| NM_003246    | THBS1     | 1139 | 1223 | 11.0024854594 |               |
| NM_003246    | THBS1     | 2443 | 2519 | 9.21398956457 |               |
| NM_003246    | THBS1     | 3794 | 3847 | 8.75455794593 |               |
| NM_003246    | THBS1     | 167  | 227  | 9.45499766407 |               |
| NM_003246    | THBS1     | 2341 | 2440 | 11.2139895646 |               |
| NM_003246    | THBS1     | 1003 | 1122 | 10.1468753687 |               |
| NM_003246    | THBS1     | 2983 | 3102 | 10.6125389411 |               |
| NM_003246    | THBS1     | 3462 | 3496 | 7.75455771001 |               |
| NM_003246    | THBS1     | 1258 | 1397 | 10.8420207872 |               |
| NM_003246    | THBS1     | 4127 | 4266 | 9.21398956457 |               |
| NM_003246    | THBS1     | 2848 | 2974 | 11.7087542563 |               |
| NM_003246    | THBS1     | 30   | 114  | 9.21398956457 |               |
| NM_003246    | THBS1     | 1651 | 1836 | 11.5094454481 |               |
| NM_003246    | THBS1     | 3278 | 3307 | 7.75455793838 |               |
| NM_003246    | THBS1     | 3107 | 3265 | 11.8206471364 |               |
| NM_003246    | THBS1     | 2545 | 2810 | 12.278119902  |               |
| NM_003246    | THBS1     | 780  | 880  | 9.45499766407 |               |
| NM_003246    | THBS1     | 3526 | 3761 | 11.2464110423 |               |
| NM_003246    | THBS1     | 3338 | 3422 | 9.84202078718 |               |
| NM_003246    | THBS1     | 1937 | 2067 | 8.75455794593 |               |
| NM_003246    | THBS1     | 2099 | 2332 | 11.3984141357 |               |
| NM_003246    | THBS1     | 233  | 644  | 12.3244135543 |               |
| NM_003246    | THBS1     | 1847 | 1908 | 8.56191286799 |               |
| NM_003246    | THBS1     | 1407 | 1592 | 11.3984141357 |               |
| NM_001199744 | SAA2-SAA4 |      | 165  | 191           | 9.2206957378  |
| NM_198525    | KIF7      | 3649 | 3671 | 9.73767418564 |               |
| NM_000624    | SERPINA5  |      | 1910 | 1975          | 3.82736914082 |
| NM_000624    | SERPINA5  |      | 475  | 530           | 3.60899431966 |
| NM_000624    | SERPINA5  |      | 59   | 99            | 3.34194231365 |
| NM_000624    | SERPINA5  |      | 1196 | 1240          | 3.02403181872 |
| NM_000624    | SERPINA5  |      | 1046 | 1116          | 4.831386741   |
| NM_000624    | SERPINA5  |      | 1978 | 2080          | 4.48346343758 |
| NM_000624    | SERPINA5  |      | 1258 | 1433          | 6.27195933238 |
| NM_000624    | SERPINA5  |      | 880  | 1013          | 6.7789193211  |
| NM_000624    | SERPINA5  |      | 580  | 854           | 7.60899431966 |
| NM_139161    | CRB3      | 372  | 418  | 10.5163088059 |               |
| NM_139164    | STARD4    | 347  | 367  | 8.26137454738 |               |

|           |          |      |      |                  |
|-----------|----------|------|------|------------------|
| NM_020440 | PTGFRN   | 1946 | 2009 | 13.9518045907    |
| NM_020440 | PTGFRN   | 989  | 1061 | 11.7294119335    |
| NM_002997 | SDC1     | 1531 | 1569 | 6.38483711587    |
| NM_002997 | SDC1     | 391  | 449  | 7.79988111028    |
| NM_002997 | SDC1     | 1089 | 1169 | 8.38484384692    |
| NM_002997 | SDC1     | 1043 | 1088 | 5.79970759588    |
| NM_002997 | SDC1     | 134  | 185  | 7.7998813462     |
| NM_002997 | SDC1     | 575  | 628  | 6.30070463754    |
| NM_002997 | SDC1     | 1586 | 1651 | 5.71574213682    |
| NM_002997 | SDC1     | 909  | 983  | 7.38484383937    |
| NM_002996 | CX3CL1   | 287  | 335  | 7.13098214672    |
| NM_002996 | CX3CL1   | 72   | 101  | 6.63197918838    |
| NM_002996 | CX3CL1   | 1234 | 1289 | 8.13098214672    |
| NM_002999 | SDC4     | 438  | 501  | 10.4055005227    |
| NM_002999 | SDC4     | 503  | 596  | 10.7050608046    |
| NM_002999 | SDC4     | 378  | 427  | 8.28984955497    |
| NM_002999 | SDC4     | 971  | 1023 | 9.62092159519    |
| NM_002999 | SDC4     | 89   | 136  | 8.29002306937    |
| NM_002999 | SDC4     | 153  | 302  | 12.0626128092    |
| NM_002998 | SDC2     | 501  | 564  | 5.22029169377    |
| NM_002998 | SDC2     | 948  | 1027 | 2.635322462      |
| NM_002998 | SDC2     | 1120 | 1191 | 3.22029169377    |
| NM_002998 | SDC2     | 903  | 939  | 1.63515544273    |
| NM_002998 | SDC2     | 1041 | 1097 | 1.63515544273    |
| NM_002998 | SDC2     | 824  | 902  | 4.33576891119    |
| NM_002998 | SDC2     | 645  | 812  | 4.95725728794    |
| NM_024830 | LPCAT1   | 837  | 902  | 7.28045500437    |
| NM_024830 | LPCAT1   | 1231 | 1286 | 6.68174262238    |
| NM_001015 | RPS11    | 282  | 322  | 1.91807006191    |
| NM_001015 | RPS11    | 339  | 374  | -0.487997242364  |
| NM_001015 | RPS11    | 77   | 128  | 2.40349015802    |
| NM_001015 | RPS11    | 397  | 496  | 2.59614196702    |
| NM_018145 | FAM82A2  | 768  | 808  | 5.75677157922    |
| NM_018142 | INTS10   | 33   | 59   | 4.47384523056    |
| NM_018259 | TTC17    | 3351 | 3377 | 6.43755064269    |
| NM_024524 | ATP13A3  | 2041 | 2080 | 7.63970493518    |
| NM_024524 | ATP13A3  | 1769 | 1809 | 6.33317330446    |
| NM_024524 | ATP13A3  | 2221 | 2260 | 6.74821080373    |
| NM_024524 | ATP13A3  | 2095 | 2137 | 7.41713876352    |
| NM_024524 | ATP13A3  | 1200 | 1236 | 4.8321762628     |
| NM_024524 | ATP13A3  | 1863 | 1933 | 8.41731251384    |
| NM_024524 | ATP13A3  | 591  | 634  | 7.63970469926    |
| NM_024524 | ATP13A3  | 3572 | 3615 | 6.74821080373    |
| NM_024524 | ATP13A3  | 3028 | 3076 | 7.83235001312    |
| NM_024524 | ATP13A3  | 1473 | 1520 | 5.74821080373    |
| NM_004496 | FOXA1    | 958  | 983  | 6.47748007349    |
| NM_012232 | PTRF     | 1543 | 1566 | 8.51925475865    |
| NM_021928 | SPCS3    | 415  | 450  | 7.13433945005    |
| NM_014805 | EPM2AIP1 |      | 16   | 37 8.41962466097 |
| NM_005354 | JUND     | 418  | 464  | 6.88377783695    |

|              |          |       |       |                   |
|--------------|----------|-------|-------|-------------------|
| NM_005359    | SMAD4    | 320   | 340   | 7.75472350081     |
| NM_018725    | IL17RB   | 822   | 884   | 7.29756637487     |
| NM_181521    | CMTM4    | 73    | 114   | 8.69018125702     |
| NM_004753    | DHRS3    | 1110  | 1158  | 4.83738685694     |
| NM_001503    | GPLD1    | 1792  | 1820  | 10.561927977      |
| NM_001505    | GPER     | 743   | 764   | 8.56977221829     |
| NM_022365    | DNAJC1   | 839   | 921   | 7.29098415466     |
| NM_022365    | DNAJC1   | 1042  | 1104  | 4.48362250155     |
| NM_022365    | DNAJC1   | 660   | 704   | 5.48345548228     |
| NM_000454    | SOD1     | 374   | 460   | 3.22193958773     |
| NM_006885    | ZFH3     | 11210 | 11253 | 9.83432527251     |
| NM_006885    | ZFH3     | 2981  | 3004  | 7.42825796824     |
| NM_006885    | ZFH3     | 13886 | 13912 | 7.51239044657     |
| NM_181701    | QS0X2    | 512   | 569   | 7.65559231328     |
| NM_181701    | QS0X2    | 1081  | 1138  | 6.07062981256     |
| NM_145048    | PACRGL   | 136   | 161   | 8.80871094851     |
| NM_024734    | CLMN     | 6677  | 6696  | 6.87061205238     |
| NM_001018038 | VPS13A   | 7603  | 7643  | 8.07676725012     |
| NM_153029    | N4BP1    | 2473  | 2492  | 7.13242298087     |
| NM_005505    | SCARB1   | 1437  | 1487  | 5.14552666527     |
| NM_005505    | SCARB1   | 1212  | 1244  | 4.06540505606     |
| NM_005505    | SCARB1   | 931   | 1068  | 8.05643486105     |
| NM_005507    | CFL1     | 1077  | 1115  | 2.38146404215     |
| NM_005507    | CFL1     | 223   | 266   | 1.29749858308     |
| NM_005507    | CFL1     | 416   | 486   | 2.38163779246     |
| NM_005506    | SCARB2   | 1525  | 1564  | 5.10869113091     |
| NM_005506    | SCARB2   | 958   | 1008  | 8.11270873108     |
| NM_005506    | SCARB2   | 1984  | 2010  | 7.11253498077     |
| NM_005506    | SCARB2   | 1603  | 1660  | 8.43463682597     |
| NM_005506    | SCARB2   | 1033  | 1073  | 8.11270873108     |
| NM_005506    | SCARB2   | 868   | 912   | 8.28263373253     |
| NM_005506    | SCARB2   | 1677  | 1721  | 6.69749748149     |
| NM_005506    | SCARB2   | 1078  | 1123  | 7.69767123158     |
| NM_005506    | SCARB2   | 1795  | 1863  | 8.43463682597     |
| NM_005506    | SCARB2   | 1244  | 1322  | 7.92006365314     |
| NM_005506    | SCARB2   | 427   | 514   | 7.92006364559     |
| NM_006315    | PCGF3    | 1324  | 1347  | 5.32299431364     |
| NM_032333    | C10orf58 |       | 600   | 666 5.93800105959 |
| NM_032333    | C10orf58 |       | 495   | 538 5.20103546542 |
| NM_032333    | C10orf58 |       | 378   | 491 7.31651268284 |
| NM_032333    | C10orf58 |       | 786   | 862 6.20103545787 |
| NM_032333    | C10orf58 |       | 281   | 378 5.6160729647  |
| NM_001127898 | CLCN5    | 1737  | 1784  | 9.82000261995     |
| NM_015291    | DNAJC16  | 1651  | 1690  | 9.86790477511     |
| NM_020995    | HPR      | 1133  | 1176  | 5.5090436947      |
| NM_002414    | CD99     | 318   | 371   | 5.5215221771      |
| NM_020998    | MST1     | 1413  | 1462  | 5.62266705119     |
| NM_177524    | MEST     | 797   | 847   | 9.54538023984     |
| NM_138349    | TP53I13  | 1165  | 1187  | 10.2766480267     |
| NM_138349    | TP53I13  | 540   | 619   | 9.92947441901     |

|              |          |      |      |                    |
|--------------|----------|------|------|--------------------|
| NM_138340    | ABHD3    | 476  | 521  | 8.85080174635      |
| NM_138340    | ABHD3    | 1304 | 1333 | 8.26182164546      |
| NM_138340    | ABHD3    | 373  | 443  | 9.07319416014      |
| NM_138340    | ABHD3    | 675  | 740  | 9.58776734052      |
| NM_138340    | ABHD3    | 1104 | 1185 | 8.26583924541      |
| NM_138346    | KIAA2013 |      | 1244 | 1288 7.21547241274 |
| NM_138346    | KIAA2013 |      | 1115 | 1162 7.21547241274 |
| NM_138346    | KIAA2013 |      | 310  | 330 5.63050991202  |
| NM_001268    | RCBTB2   | 364  | 383  | 11.3297684111      |
| NM_001142298 | SQSTM1   | 1590 | 1625 | 5.52719883865      |
| NM_001142298 | SQSTM1   | 1478 | 1520 | 4.85827087886      |
| NM_001142298 | SQSTM1   | 1277 | 1399 | 6.74976501031      |
| NM_001142298 | SQSTM1   | 799  | 850  | 5.52736585792      |
| NM_134270    | SMTN     | 1204 | 1243 | 7.82791350026      |
| NM_012218    | ILF3     | 178  | 203  | 4.39273876555      |
| NM_001997    | FAU      | 405  | 452  | 3.3495269231       |
| NM_182709    | KAT5     | 1813 | 1838 | 7.56647228789      |
| NM_000029    | AGT      | 645  | 682  | 2.61673214068      |
| NM_000029    | AGT      | 1172 | 1340 | 6.17744709538      |
| NM_000029    | AGT      | 1422 | 1460 | 4.38226688726      |
| NM_000029    | AGT      | 1466 | 1511 | 3.29480404601      |
| NM_000029    | AGT      | 1849 | 1935 | 3.87976654674      |
| NM_000029    | AGT      | 1595 | 1845 | 6.36089323647      |
| NM_000029    | AGT      | 990  | 1060 | 3.75423566465      |
| NM_000029    | AGT      | 1511 | 1594 | 4.38226688727      |
| NM_000029    | AGT      | 2085 | 2125 | 1.29078644584      |
| NM_000029    | AGT      | 903  | 979  | 4.10215896807      |
| NM_000029    | AGT      | 761  | 898  | 4.46472904746      |
| NM_000021    | PSEN1    | 1257 | 1305 | 9.37560497942      |
| NM_000021    | PSEN1    | 851  | 902  | 9.32224066506      |
| NM_000021    | PSEN1    | 998  | 1046 | 9.58527507089      |
| NM_000021    | PSEN1    | 641  | 674  | 8.32206691474      |
| NM_181501    | ITGA1    | 2388 | 2432 | 6.47467208715      |
| NM_181501    | ITGA1    | 479  | 507  | 7.55880456548      |
| NM_181501    | ITGA1    | 776  | 812  | 7.05963458788      |
| NM_181501    | ITGA1    | 1961 | 2006 | 7.55881128899      |
| NM_181501    | ITGA1    | 2533 | 2581 | 6.47467208715      |
| NM_181501    | ITGA1    | 2338 | 2376 | 7.13975619709      |
| NM_181501    | ITGA1    | 2968 | 2997 | 5.55863754622      |
| NM_181501    | ITGA1    | 1205 | 1281 | 7.8807393912       |
| NM_181501    | ITGA1    | 1810 | 1839 | 6.55479369637      |
| NM_181501    | ITGA1    | 3094 | 3140 | 7.88073938388      |
| NM_181501    | ITGA1    | 883  | 954  | 7.55881129653      |
| NM_181501    | ITGA1    | 515  | 568  | 5.55479369637      |
| NM_145061    | SKA3     | 174  | 192  | 7.50889880453      |
| NM_145064    | STAC3    | 1148 | 1166 | 11.8894675203      |
| NM_203463    | CERS6    | 140  | 216  | 9.50044013297      |
| NM_203463    | CERS6    | 1064 | 1094 | 8.91530388193      |
| NM_203463    | CERS6    | 1316 | 1350 | 7.9154709012       |
| NM_004924    | ACTN4    | 1902 | 1947 | 4.21159689806      |

|              |         |      |      |                  |
|--------------|---------|------|------|------------------|
| NM_004924    | ACTN4   | 1595 | 1643 | 4.88069860817    |
| NM_004924    | ACTN4   | 510  | 573  | 6.1030910295     |
| NM_004924    | ACTN4   | 1380 | 1448 | 4.29573587153    |
| NM_004924    | ACTN4   | 1038 | 1095 | 2.21159689806    |
| NM_004924    | ACTN4   | 219  | 258  | 3.79655939878    |
| NM_004924    | ACTN4   | 2133 | 2188 | 4.61749045202    |
| NM_004924    | ACTN4   | 2495 | 2529 | 3.88069860794    |
| NM_004924    | ACTN4   | 286  | 382  | 5.99617582559    |
| NM_004924    | ACTN4   | 724  | 806  | 4.29573587153    |
| NM_004924    | ACTN4   | 53   | 134  | 4.61766420233    |
| NM_004924    | ACTN4   | 923  | 1010 | 4.29572937639    |
| NM_004926    | ZFP36L1 | 2657 | 2708 | 8.37102369716    |
| NM_004255    | COX5A   | 507  | 567  | 5.99790025319    |
| NM_022821    | ELOVL1  | 406  | 473  | 10.0057674756    |
| NM_020464    | NHSL1   | 5252 | 5340 | 7.79543603953    |
| NM_014256    | B3GNT3  | 1029 | 1094 | 13.9277463192    |
| NM_014256    | B3GNT3  | 947  | 1019 | 11.22328900009   |
| NM_002317    | LOX     | 1123 | 1171 | 7.75204451585    |
| NM_002317    | LOX     | 1551 | 1574 | 4.94067200116    |
| NM_002317    | LOX     | 367  | 407  | 5.94067200116    |
| NM_002317    | LOX     | 634  | 710  | 8.26661769623    |
| NM_024501    | H0XD1   | 263  | 283  | 12.3678003092    |
| NM_002153    | HSD17B2 | 1184 | 1227 | 7.72964865802    |
| NM_002153    | HSD17B2 | 630  | 680  | 6.72964865801    |
| NM_002153    | HSD17B2 | 987  | 1029 | 5.50323863651    |
| NM_002153    | HSD17B2 | 869  | 934  | 7.6227334541     |
| NM_002153    | HSD17B2 | 731  | 784  | 4.91827613579    |
| NM_001144995 | CCDC85C | 922  | 952  | 8.46006524061    |
| NM_001025300 | RAB12   | 231  | 262  | 3.9584602833     |
| NM_018128    | TSR1    | 996  | 1035 | 6.58301663048    |
| NM_018127    | ELAC2   | 598  | 642  | 7.81685389315    |
| NM_018126    | TMEM33  | 466  | 508  | 9.77983952609    |
| NM_018126    | TMEM33  | 555  | 585  | 10.3607844342    |
| NM_018126    | TMEM33  | 698  | 730  | 10.1015938782    |
| NM_018126    | TMEM33  | 748  | 828  | 11.2392711523    |
| NM_018126    | TMEM33  | 958  | 1061 | 11.4802792518    |
| NM_018126    | TMEM33  | 856  | 915  | 9.36480202681    |
| NM_014827    | ZC3H11A | 2026 | 2067 | 5.77655039846    |
| NM_014820    | TOMM70A | 3224 | 3251 | 5.53704209669    |
| NM_014822    | SEC24D  | 1973 | 1991 | 6.60235709221    |
| NM_001190716 | DNM2    | 1981 | 2032 | 6.17098729324    |
| NM_001177413 | RPS27A  | 431  | 481  | 0.00478541624428 |
| NM_001177413 | RPS27A  | 489  | 556  | -0.317142914562  |
| NM_001030    | RPS27   | 187  | 228  | 4.15723614549    |
| NM_001520    | GTF3C1  | 2921 | 2988 | 8.03766753664    |
| NM_022346    | NCAPG   | 3145 | 3207 | 6.17591734491    |
| NM_001031710 | KLHL7   | 1901 | 1923 | 6.96309859693    |
| NM_001031847 | CPT1A   | 722  | 788  | 7.33170663092    |
| NM_001031847 | CPT1A   | 788  | 815  | 5.24756742154    |
| NM_001031847 | CPT1A   | 1191 | 1217 | 5.33153288061    |

|              |         |       |       |               |
|--------------|---------|-------|-------|---------------|
| NM_001031847 | CPT1A   | 854   | 932   | 6.65363472581 |
| NM_178148    | SLC35B2 | 123   | 197   | 7.05207814282 |
| NM_016219    | MAN1B1  | 1025  | 1049  | 6.1586127668  |
| NM_001204450 | CCPG1   | 1570  | 1608  | 6.99043506327 |
| NM_001204450 | CCPG1   | 1395  | 1473  | 7.73141825761 |
| NM_198976    | TH1L    | 1503  | 1549  | 3.77077413976 |
| NM_000927    | ABCB1   | 3986  | 4034  | 7.99064010587 |
| NM_000927    | ABCB1   | 957   | 997   | 7.18328519136 |
| NM_000927    | ABCB1   | 3039  | 3101  | 7.6841084827  |
| NM_000927    | ABCB1   | 1158  | 1197  | 6.76824096103 |
| NM_000927    | ABCB1   | 1459  | 1497  | 6.17926759119 |
| NM_000927    | ABCB1   | 2538  | 2567  | 7.50503953593 |
| NM_000927    | ABCB1   | 842   | 875   | 5.18328495544 |
| NM_000927    | ABCB1   | 2226  | 2251  | 6.18311144104 |
| NM_000927    | ABCB1   | 1502  | 1540  | 7.99064011342 |
| NM_000927    | ABCB1   | 3623  | 3723  | 8.76824769208 |
| NM_000927    | ABCB1   | 1381  | 1442  | 8.18328519136 |
| NM_000927    | ABCB1   | 1098  | 1136  | 5.17926759119 |
| NM_000927    | ABCB1   | 3151  | 3191  | 5.09914598198 |
| NM_000927    | ABCB1   | 3389  | 3461  | 6.18328518381 |
| NM_000927    | ABCB1   | 3210  | 3245  | 6.09914598198 |
| NM_000927    | ABCB1   | 1236  | 1321  | 9.09017578697 |
| NM_000927    | ABCB1   | 2888  | 2939  | 6.18311144104 |
| NM_002334    | LRP4    | 13    | 37    | 9.36230243238 |
| NM_003969    | UBE2M   | 563   | 595   | 5.02163505797 |
| NM_003960    | NAT8    | 618   | 664   | 9.52531409152 |
| NM_003960    | NAT8    | 516   | 551   | 9.60927955059 |
| NM_001032394 | GPR126  | 2452  | 2493  | 4.68946750976 |
| NM_024759    | NIPAL2  | 588   | 608   | 12.3635671416 |
| NM_007065    | CDC37   | 111   | 160   | 5.33386587223 |
| NM_024753    | TTC21B  | 2382  | 2402  | 6.14033962027 |
| NM_145296    | CADM4   | 599   | 636   | 7.45104658709 |
| NM_004886    | APBA3   | 11    | 39    | 11.3554777871 |
| NM_004550    | NDUFS2  | 538   | 579   | 2.84119563976 |
| NM_005529    | HSPG2   | 7404  | 7467  | 9.50558104745 |
| NM_005529    | HSPG2   | 3474  | 3533  | 9.00074015594 |
| NM_005529    | HSPG2   | 1094  | 1157  | 11.5897202568 |
| NM_005529    | HSPG2   | 3388  | 3424  | 8.00074015594 |
| NM_005529    | HSPG2   | 7145  | 7191  | 9.00475102506 |
| NM_005529    | HSPG2   | 1805  | 1888  | 11.0047577561 |
| NM_005529    | HSPG2   | 4681  | 4743  | 9.58954650652 |
| NM_005529    | HSPG2   | 6564  | 6621  | 11.0047575202 |
| NM_005529    | HSPG2   | 1538  | 1584  | 10.5857026567 |
| NM_005529    | HSPG2   | 2784  | 2845  | 10.326685851  |
| NM_005529    | HSPG2   | 6423  | 6485  | 10.5897202493 |
| NM_005529    | HSPG2   | 8881  | 8938  | 10.5897202568 |
| NM_005529    | HSPG2   | 1955  | 2003  | 9.50558104745 |
| NM_005529    | HSPG2   | 12121 | 12177 | 10.0045840058 |
| NM_005529    | HSPG2   | 10552 | 10593 | 10.8121126782 |
| NM_005529    | HSPG2   | 11920 | 11951 | 7.92061854673 |



|              |        |       |       |                  |
|--------------|--------|-------|-------|------------------|
| NM_005529    | HSPG2  | 9723  | 9776  | 9.00475774856    |
| NM_005529    | HSPG2  | 491   | 528   | 10.0007401559    |
| NM_005529    | HSPG2  | 9549  | 9599  | 9.58954650652    |
| NM_005529    | HSPG2  | 10409 | 10471 | 10.0047510251    |
| NM_005529    | HSPG2  | 959   | 1061  | 11.5897202568    |
| NM_005529    | HSPG2  | 8307  | 8347  | 9.58954650652    |
| NM_005529    | HSPG2  | 3016  | 3071  | 10.0045840058    |
| NM_005529    | HSPG2  | 12461 | 12514 | 10.3266856151    |
| NM_005529    | HSPG2  | 729   | 782   | 8.00074015594    |
| NM_005529    | HSPG2  | 1231  | 1295  | 10.5895465065    |
| NM_003786    | ABCC3  | 1197  | 1240  | 10.6863293282    |
| NM_003786    | ABCC3  | 1508  | 1546  | 8.87495680595    |
| NM_006332    | IFI30  | 955   | 986   | 9.32924528484    |
| NM_006332    | IFI30  | 810   | 862   | 11.3332628848    |
| NM_006332    | IFI30  | 874   | 926   | 11.9180516354    |
| NM_006332    | IFI30  | 734   | 783   | 11.333256154     |
| NM_006332    | IFI30  | 46    | 177   | 14.333262885     |
| NM_006332    | IFI30  | 238   | 684   | 16.462545902     |
| NM_001203258 | MTA1   | 29    | 74    | 5.51117997931    |
| NM_005787    | ALG3   | 1183  | 1223  | 7.90795704274    |
| NM_005787    | ALG3   | 483   | 549   | 7.90795031923    |
| NM_002787    | PSMA2  | 582   | 604   | 3.94531717169    |
| NM_001134492 | HS2ST1 | 991   | 1064  | 8.66106583693    |
| NM_001034025 | ERP29  | 635   | 701   | 7.38089293327    |
| NM_001034025 | ERP29  | 260   | 321   | 8.27397772935    |
| NM_001034025 | ERP29  | 545   | 593   | 6.89545937505    |
| NM_001084    | PL0D3  | 1778  | 1823  | 8.41252866182    |
| NM_001084    | PL0D3  | 2239  | 2289  | 8.08163036438    |
| NM_001084    | PL0D3  | 2878  | 2925  | 8.95609925393    |
| NM_001084    | PL0D3  | 2651  | 2710  | 7.49666786366    |
| NM_001084    | PL0D3  | 2499  | 2578  | 9.88898529399    |
| NM_001084    | PL0D3  | 992   | 1076  | 9.40355846682    |
| NM_001084    | PL0D3  | 2137  | 2209  | 7.81859596609    |
| NM_001084    | PL0D3  | 1569  | 1655  | 7.81859596609    |
| NM_001084    | PL0D3  | 2289  | 2369  | 7.49666787121    |
| NM_001084    | PL0D3  | 1888  | 1986  | 7.81859596609    |
| NM_001084    | PL0D3  | 1086  | 1331  | 10.9229326259    |
| NM_001084    | PL0D3  | 1353  | 1439  | 8.66659287265    |
| NM_001084    | PL0D3  | 2017  | 2091  | 8.49666787121    |
| NM_001084    | PL0D3  | 633   | 819   | 10.140524061     |
| NM_030926    | ITM2C  | 323   | 370   | 7.17074584233    |
| NM_030926    | ITM2C  | 849   | 888   | 4.76485228838    |
| NM_030926    | ITM2C  | 584   | 623   | 7.17074584233    |
| NM_030926    | ITM2C  | 1015  | 1062  | 6.3498147891     |
| NM_021130    | PPIA   | 539   | 592   | 3.1645712076     |
| NM_021130    | PPIA   | 473   | 521   | 3.57960870688    |
| NM_021130    | PPIA   | 317   | 345   | 1.91050699678    |
| NM_021130    | PPIA   | 417   | 463   | -0.0894930032249 |
| NM_148170    | CTSC   | 361   | 408   | 9.36610227112    |
| NM_148170    | CTSC   | 289   | 318   | 7.11800100735    |

|              |          |      |      |                    |
|--------------|----------|------|------|--------------------|
| NM_148170    | CTSC     | 184  | 219  | 6.61899804901      |
| NM_019082    | DDX56    | 1692 | 1733 | 7.32985969254      |
| NM_017623    | CNNM3    | 261  | 280  | 6.33469199274      |
| NM_017623    | CNNM3    | 1133 | 1164 | 8.25457038353      |
| NM_017623    | CNNM3    | 936  | 987  | 7.25457038353      |
| NM_012234    | RYBP     | 21   | 49   | 4.13927092715      |
| NM_004491    | ARHGAP35 |      | 2735 | 2754 5.30871565931 |
| NM_006923    | SDF2     | 642  | 720  | 8.1785541531       |
| NM_006927    | ST3GAL2  | 33   | 68   | 9.43908139938      |
| NM_001164319 | FLNB     | 1856 | 1896 | 4.96121413626      |
| NM_001164319 | FLNB     | 2022 | 2057 | 5.76856905832      |
| NM_003204    | NFE2L1   | 3002 | 3039 | 5.46296034418      |
| NM_003204    | NFE2L1   | 130  | 212  | 6.27031526624      |
| NM_003204    | NFE2L1   | 2692 | 2724 | 5.46296034418      |
| NM_003204    | NFE2L1   | 1311 | 1372 | 6.71702455501      |
| NM_003204    | NFE2L1   | 420  | 454  | 4.46296034418      |
| NM_003205    | TCF12    | 987  | 1008 | 5.94683740855      |
| NM_017952    | PTCD3    | 5409 | 5444 | 5.65588843944      |
| NM_153251    | ZDHHC20  | 225  | 330  | 9.13150016918      |
| NM_001135651 | EIF2AK2  | 104  | 138  | 4.448921722        |
| NM_001042466 | PSAP     | 1641 | 1692 | 5.70567820963      |
| NM_001042466 | PSAP     | 572  | 616  | 6.16510982827      |
| NM_001042466 | PSAP     | 1945 | 1990 | 3.70567797371      |
| NM_001042466 | PSAP     | 617  | 667  | 4.0276060686       |
| NM_001042466 | PSAP     | 1803 | 1864 | 4.29064071035      |
| NM_001042466 | PSAP     | 2270 | 2332 | 3.20650150097      |
| NM_001042466 | PSAP     | 76   | 106  | 3.62153900025      |
| NM_001042466 | PSAP     | 1449 | 1564 | 7.68295813313      |
| NM_001042466 | PSAP     | 1568 | 1632 | 4.87560321107      |
| NM_001042466 | PSAP     | 1993 | 2052 | 4.51303313169      |
| NM_001042466 | PSAP     | 319  | 526  | 7.56365920476      |
| NM_001042466 | PSAP     | 2483 | 2673 | 5.40611792777      |
| NM_001042466 | PSAP     | 1732 | 1796 | 4.87560321107      |
| NM_001042466 | PSAP     | 1901 | 1931 | 1.62153900025      |
| NM_001042466 | PSAP     | 108  | 270  | 6.79314105088      |
| NM_001042466 | PSAP     | 2335 | 2475 | 4.51303313169      |
| NM_001042466 | PSAP     | 888  | 1443 | 9.37101412682      |
| NM_001042466 | PSAP     | 672  | 875  | 8.16510982827      |
| NM_015885    | PCF11    | 3230 | 3249 | 6.58789675378      |
| NM_001098577 | RPL31    | 329  | 387  | 2.94770804758      |
| NM_013339    | ALG6     | 1652 | 1745 | 12.7988332368      |
| NM_001199878 | SERF2    | 308  | 369  | 4.11993992472      |
| NM_001199878 | SERF2    | 423  | 512  | 3.80202269895      |
| NM_013336    | SEC61A1  | 407  | 465  | 8.2524806667       |
| NM_013336    | SEC61A1  | 1121 | 1189 | 8.78299539095      |
| NM_013336    | SEC61A1  | 541  | 632  | 8.54198729144      |
| NM_013336    | SEC61A1  | 1250 | 1343 | 9.78299539095      |
| NM_013336    | SEC61A1  | 1678 | 1721 | 6.58337896414      |
| NM_013336    | SEC61A1  | 480  | 526  | 6.66350057335      |
| NM_013336    | SEC61A1  | 1404 | 1449 | 6.6675181733       |

|              |         |       |       |               |
|--------------|---------|-------|-------|---------------|
| NM_013336    | SEC61A1 | 945   | 980   | 7.08238192249 |
| NM_013336    | SEC61A1 | 1540  | 1590  | 5.08238192249 |
| NM_013336    | SEC61A1 | 2863  | 2942  | 5.08255543689 |
| NM_013336    | SEC61A1 | 790   | 819   | 7.88991058731 |
| NM_013336    | SEC61A1 | 242   | 335   | 8.66751817353 |
| NM_013336    | SEC61A1 | 49    | 112   | 7.08255566526 |
| NM_013336    | SEC61A1 | 1449  | 1527  | 6.66751817353 |
| NM_013336    | SEC61A1 | 648   | 766   | 9.17001851406 |
| NM_139283    | PPTC7   | 305   | 344   | 8.80736946633 |
| NM_139283    | PPTC7   | 207   | 227   | 8.80335186616 |
| NM_001012614 | CTBP1   | 1782  | 1825  | 7.40833271672 |
| NM_001012614 | CTBP1   | 748   | 783   | 6.08640462183 |
| NM_002333    | LRP3    | 935   | 988   | 9.95342596552 |
| NM_002333    | LRP3    | 1485  | 1554  | 10.9535997158 |
| NM_002332    | LRP1    | 6366  | 6397  | 4.64580300527 |
| NM_002332    | LRP1    | 11475 | 11542 | 5.72976846433 |
| NM_002332    | LRP1    | 3316  | 3364  | 6.31490471537 |
| NM_002332    | LRP1    | 10509 | 10577 | 6.31490471537 |
| NM_002332    | LRP1    | 11253 | 11294 | 6.05187030199 |
| NM_002332    | LRP1    | 8578  | 8649  | 6.31490471537 |
| NM_002332    | LRP1    | 3196  | 3258  | 6.3108871152  |
| NM_002332    | LRP1    | 10976 | 11051 | 6.72994221465 |
| NM_002332    | LRP1    | 9843  | 9895  | 7.05187030954 |
| NM_002332    | LRP1    | 8702  | 8770  | 6.53729713671 |
| NM_002332    | LRP1    | 10772 | 10816 | 6.3108871152  |
| NM_002332    | LRP1    | 8970  | 9015  | 6.89986048504 |
| NM_002332    | LRP1    | 5440  | 5500  | 6.53729713649 |
| NM_002332    | LRP1    | 13999 | 14125 | 6.05187030954 |
| NM_002332    | LRP1    | 11810 | 11861 | 5.23076550599 |
| NM_002332    | LRP1    | 3447  | 3507  | 4.72976846433 |
| NM_002332    | LRP1    | 9380  | 9442  | 5.31490471515 |
| NM_002332    | LRP1    | 14515 | 14571 | 6.89986048504 |
| NM_002332    | LRP1    | 8844  | 8876  | 4.7299354836  |
| NM_002332    | LRP1    | 11593 | 11662 | 6.3108871152  |
| NM_002332    | LRP1    | 2416  | 2479  | 5.72994221465 |
| NM_002332    | LRP1    | 13907 | 13960 | 6.31490471537 |
| NM_002332    | LRP1    | 9509  | 9556  | 6.05169655922 |
| NM_002332    | LRP1    | 2308  | 2334  | 4.72994197873 |
| NM_002332    | LRP1    | 579   | 621   | 6.23076550599 |
| NM_002332    | LRP1    | 9202  | 9241  | 5.31489798432 |
| NM_002332    | LRP1    | 3964  | 4040  | 7.05187030954 |
| NM_002332    | LRP1    | 700   | 738   | 4.72976846433 |
| NM_002844    | PTPRK   | 3335  | 3394  | 5.88483703507 |
| NM_002844    | PTPRK   | 1630  | 1657  | 6.55889807107 |
| NM_002844    | PTPRK   | 2310  | 2368  | 6.88484376612 |
| NM_002335    | LRP5    | 3822  | 3903  | 6.66077645861 |
| NM_002335    | LRP5    | 1522  | 1564  | 6.24573895178 |
| NM_002335    | LRP5    | 2330  | 2361  | 4.66060270829 |
| NM_002335    | LRP5    | 283   | 372   | 7.24573895933 |
| NM_002335    | LRP5    | 1456  | 1494  | 5.57663724923 |

|              |          |      |      |                  |
|--------------|----------|------|------|------------------|
| NM_002335    | LRP5     | 2666 | 2732 | 5.66077622269    |
| NM_002335    | LRP5     | 1890 | 1954 | 5.39774181686    |
| NM_002335    | LRP5     | 817  | 889  | 5.87915127978    |
| NM_002335    | LRP5     | 4163 | 4205 | 5.39774181686    |
| NM_002335    | LRP5     | 993  | 1027 | 4.66060270829    |
| NM_002335    | LRP5     | 518  | 556  | 2.99167474851    |
| NM_002335    | LRP5     | 4069 | 4105 | 4.07564020757    |
| NM_002335    | LRP5     | 1686 | 1733 | 5.07581372197    |
| NM_002335    | LRP5     | 1074 | 1129 | 6.07581372197    |
| NM_002335    | LRP5     | 4789 | 4844 | 5.66077645861    |
| NM_002335    | LRP5     | 1359 | 1408 | 5.8831621489     |
| NM_002335    | LRP5     | 4567 | 4651 | 6.07581395767    |
| NM_002335    | LRP5     | 3918 | 3960 | 5.07179635772    |
| NM_002335    | LRP5     | 2432 | 2497 | 5.07581395034    |
| NM_002335    | LRP5     | 1750 | 1813 | 4.66077645861    |
| NM_002335    | LRP5     | 2582 | 2648 | 5.65675885844    |
| NM_002335    | LRP5     | 1135 | 1224 | 5.39756830246    |
| NM_002335    | LRP5     | 598  | 708  | 5.07581395789    |
| NM_002335    | LRP5     | 3474 | 3570 | 4.66076972756    |
| NM_002335    | LRP5     | 386  | 506  | 5.88316887995    |
| NM_001126102 | HP       | 968  | 1003 | 4.08546618319    |
| NM_001126102 | HP       | 1144 | 1187 | 4.40722076368    |
| NM_004466    | GPC5     | 1361 | 1395 | 13.106133255     |
| NM_018243    | SEPT11   | 1041 | 1075 | 5.17607195856    |
| NM_001100169 | IMMT     | 1574 | 1601 | 4.6809124587     |
| NM_147190    | CERS5    | 307  | 328  | 9.12878335044    |
| NM_004168    | SDHA     | 2025 | 2078 | 5.69136440827    |
| NM_080725    | SRXN1    | 199  | 239  | 11.7905933686    |
| NM_205834    | LSR      | 515  | 570  | 8.60285574878    |
| NM_205834    | LSR      | 1700 | 1733 | 7.38028957713    |
| NM_205834    | LSR      | 813  | 877  | 8.60285574878    |
| NM_205834    | LSR      | 1341 | 1392 | 8.11742868569    |
| NM_205834    | LSR      | 1806 | 1872 | 9.49594054487    |
| NM_205834    | LSR      | 1979 | 2042 | 9.79550082673    |
| NM_205834    | LSR      | 239  | 287  | 8.11742219056    |
| NM_205834    | LSR      | 1270 | 1326 | 9.11742892161    |
| NM_205834    | LSR      | 427  | 458  | 6.71136161734    |
| NM_205834    | LSR      | 1415 | 1472 | 8.60285574123    |
| NM_205834    | LSR      | 1491 | 1609 | 9.79550082673    |
| NM_005319    | HIST1H1C |      | 39   | 89 10.2231488137 |
| NM_005313    | PDIA3    | 774  | 835  | 5.0268960858     |
| NM_005313    | PDIA3    | 1320 | 1419 | 5.35810199427    |
| NM_005313    | PDIA3    | 688  | 761  | 4.46501719819    |
| NM_005313    | PDIA3    | 560  | 598  | 2.39462763438    |
| NM_005313    | PDIA3    | 1152 | 1318 | 5.74512511738    |
| NM_005313    | PDIA3    | 1547 | 1576 | 1.65766226858    |
| NM_005313    | PDIA3    | 1722 | 1755 | 0.988560566025   |
| NM_005313    | PDIA3    | 1680 | 1717 | 3.07269304436    |
| NM_005313    | PDIA3    | 118  | 359  | 5.59626173147    |
| NM_005313    | PDIA3    | 897  | 1145 | 6.3015184659     |

|              |            |      |      |                   |
|--------------|------------|------|------|-------------------|
| NM_005313    | PDIA3      | 463  | 559  | 4.82758727757     |
| NM_001079524 | PAICS      | 995  | 1093 | 3.96587430391     |
| NM_032016    | STARD3NL   |      | 754  | 790 7.10315718197 |
| NM_016056    | TMBIM4     | 522  | 551  | 7.69775725595     |
| NM_001008530 | LGMN       | 941  | 999  | 5.39598507517     |
| NM_001008530 | LGMN       | 1043 | 1119 | 5.98112132621     |
| NM_001008530 | LGMN       | 1703 | 1744 | 7.20351374755     |
| NM_001008530 | LGMN       | 1489 | 1544 | 6.98111459516     |
| NM_001008530 | LGMN       | 537  | 579  | 6.633947711       |
| NM_001008530 | LGMN       | 1559 | 1600 | 6.71808668446     |
| NM_001008539 | SLC7A2     | 766  | 796  | 7.32303642711     |
| NM_001008539 | SLC7A2     | 1648 | 1707 | 7.92174880177     |
| NM_001008539 | SLC7A2     | 457  | 516  | 7.18460946484     |
| NM_001008539 | SLC7A2     | 1080 | 1128 | 6.51568150505     |
| NM_001008539 | SLC7A2     | 927  | 995  | 7.76974571588     |
| NM_001008539 | SLC7A2     | 1038 | 1067 | 5.59964696412     |
| NM_173852    | KRTCAP2    | 267  | 297  | 9.48684519925     |
| NM_173852    | KRTCAP2    | 368  | 459  | 9.22397781268     |
| NM_016946    | F11R       | 560  | 620  | 8.57038723629     |
| NM_016946    | F11R       | 317  | 351  | 8.26385560557     |
| NM_016946    | F11R       | 941  | 1031 | 10.4634720324     |
| NM_016946    | F11R       | 898  | 932  | 8.3479880839      |
| NM_016946    | F11R       | 517  | 546  | 7.26385560557     |
| NM_016946    | F11R       | 681  | 759  | 9.34799481496     |
| NM_016946    | F11R       | 1514 | 1565 | 7.34397721478     |
| NM_016946    | F11R       | 628  | 668  | 7.34397721478     |
| NM_016946    | F11R       | 1051 | 1105 | 6.76303231424     |
| NM_016946    | F11R       | 406  | 491  | 8.76303231424     |
| NM_016946    | F11R       | 1195 | 1261 | 8.0849604089      |
| NM_016946    | F11R       | 803  | 895  | 9.57038723629     |
| NM_001040874 | HIST2H2AA4 |      | 225  | 285 5.80824762642 |
| NM_001040874 | HIST2H2AA4 |      | 315  | 349 6.80824762642 |
| NM_153649    | TPM3       | 596  | 639  | 2.50015027827     |
| NM_001198934 | ABCC10     | 1358 | 1429 | 10.6143573466     |
| NM_001198934 | ABCC10     | 3602 | 3621 | 10.1153543883     |
| NM_004064    | CDKN1B     | 923  | 960  | 4.98036269382     |
| NM_001011    | RPS7       | 443  | 490  | -0.798092258588   |
| NM_001010    | RPS6       | 385  | 429  | 0.984703373812    |
| NM_001010    | RPS6       | 124  | 169  | 1.24372691053     |
| NM_001540    | HSPB1      | 806  | 854  | 7.87385811087     |
| NM_001540    | HSPB1      | 447  | 517  | 7.87787571105     |
| NM_001014    | RPS10      | 541  | 584  | 2.85558034573     |
| NM_000942    | PPIB       | 309  | 382  | 3.18162883577     |
| NM_000942    | PPIB       | 150  | 232  | 2.66705566294     |
| NM_000942    | PPIB       | 383  | 430  | 2.66705566294     |
| NM_000942    | PPIB       | 440  | 590  | 4.50355693066     |
| NM_000942    | PPIB       | 607  | 653  | 0.859700740658    |
| NM_000942    | PPIB       | 874  | 944  | 0.855683140708    |
| NM_000942    | PPIB       | 665  | 874  | 3.85970074088     |
| NM_000940    | PON3       | 156  | 192  | 9.94241359792     |

|              |          |      |      |                   |
|--------------|----------|------|------|-------------------|
| NM_000941    | POR      | 529  | 617  | 6.90736841139     |
| NM_000941    | POR      | 1894 | 1965 | 5.7818375293      |
| NM_000941    | POR      | 640  | 687  | 4.90736841139     |
| NM_000941    | POR      | 1064 | 1095 | 4.56019479617     |
| NM_000941    | POR      | 1238 | 1269 | 3.32239917961     |
| NM_000941    | POR      | 414  | 468  | 5.12976083272     |
| NM_000941    | POR      | 1384 | 1448 | 5.49233091189     |
| NM_000941    | POR      | 1549 | 1629 | 3.90719466107     |
| NM_000941    | POR      | 813  | 848  | 4.32240590312     |
| NM_000941    | POR      | 1500 | 1530 | 4.90736168033     |
| NM_000941    | POR      | 1317 | 1359 | 3.31838831049     |
| NM_000941    | POR      | 1967 | 2055 | 5.32240591067     |
| NM_000941    | POR      | 928  | 1061 | 5.64433400555     |
| NM_000941    | POR      | 2077 | 2140 | 3.32240591044     |
| NM_000941    | POR      | 1835 | 1885 | 4.31838831049     |
| NM_000941    | POR      | 687  | 808  | 6.49233091211     |
| NM_000941    | POR      | 1745 | 1830 | 5.49233091189     |
| NM_194252    | TTL11    | 407  | 434  | 8.51088609753     |
| NM_138689    | PPP1R14B |      | 515  | 576 3.87681466776 |
| NM_020672    | S100A14  | 555  | 637  | 9.14712161336     |
| NM_020672    | S100A14  | 385  | 480  | 9.46922345856     |
| NM_001080410 | FBX041   | 1341 | 1361 | 9.94939864927     |
| NM_017542    | POGK     | 82   | 102  | 7.83589673046     |
| NM_017542    | POGK     | 1701 | 1720 | 7.75176425213     |
| NM_152850    | PIGO     | 696  | 732  | 11.0793125871     |
| NM_152850    | PIGO     | 1284 | 1336 | 11.4943500866     |
| NM_001001851 | ITIH5    | 2133 | 2153 | 11.1422545488     |
| NM_006135    | CAPZA1   | 384  | 444  | 5.25884421451     |
| NM_001127198 | TMC6     | 1528 | 1580 | 6.18937548615     |
| NM_001199111 | MDH1     | 338  | 447  | 5.21305228822     |
| NM_005811    | GDF11    | 120  | 166  | 10.1868858153     |
| NM_032376    | TMEM101  | 508  | 553  | 7.32569291494     |
| NM_032376    | TMEM101  | 703  | 790  | 7.74073042177     |
| NM_001184741 | FGB      | 937  | 1008 | 3.12677248874     |
| NM_001184741 | FGB      | 1132 | 1178 | 2.86373808313     |
| NM_001184741 | FGB      | 1062 | 1128 | 2.12677248896     |
| NM_001184741 | FGB      | 301  | 332  | 4.12677248896     |
| NM_001184741 | FGB      | 853  | 931  | 4.12677248896     |
| NM_001184741 | FGB      | 549  | 624  | 4.00124160688     |
| NM_001184741 | FGB      | 1188 | 1279 | 4.12677248896     |
| NM_001184741 | FGB      | 397  | 482  | 4.00124160688     |
| NM_001184741 | FGB      | 659  | 820  | 6.00124160688     |
| NM_001184740 | CTTN     | 1658 | 1696 | 5.04815489546     |
| NM_018849    | ABCB4    | 1302 | 1332 | 6.62706730282     |
| NM_152716    | PATL1    | 1363 | 1383 | 6.3526889402      |
| NM_001040092 | ENPP2    | 986  | 1028 | 10.6032204104     |
| NM_001040092 | ENPP2    | 433  | 480  | 9.38100173913     |
| NM_001040092 | ENPP2    | 2279 | 2315 | 10.1179670976     |
| NM_001040092 | ENPP2    | 513  | 545  | 7.79586548831     |
| NM_001040092 | ENPP2    | 1616 | 1653 | 11.1179673335     |

|              |          |      |      |                    |
|--------------|----------|------|------|--------------------|
| NM_001040092 | ENPP2    | 1758 | 1803 | 9.38100150343      |
| NM_001040092 | ENPP2    | 1893 | 1919 | 7.71190002925      |
| NM_001040092 | ENPP2    | 650  | 680  | 7.79603250758      |
| NM_014786    | ARHGEF17 |      | 290  | 322 9.4257547313   |
| NM_022130    | GOLPH3   | 409  | 449  | 4.41210178748      |
| NM_199141    | CARM1    | 14   | 74   | 6.10218316404      |
| NM_001958    | EEF1A2   | 665  | 710  | 10.1364415285      |
| NM_006908    | RAC1     | 586  | 651  | 6.24367221363      |
| NM_006908    | RAC1     | 1471 | 1542 | 4.43230642246      |
| NM_006908    | RAC1     | 243  | 286  | 6.02128652313      |
| NM_006908    | RAC1     | 2129 | 2188 | 3.43230642246      |
| NM_001137675 | ATXN1L   | 7393 | 7445 | 8.13804012704      |
| NM_030943    | AMN      | 528  | 578  | 10.0516218535      |
| NM_030943    | AMN      | 755  | 812  | 11.05161513        |
| NM_030943    | AMN      | 603  | 670  | 8.04760426092      |
| NM_030943    | AMN      | 232  | 369  | 10.6365843618      |
| NM_032810    | ATAD1    | 1077 | 1125 | 3.43105726191      |
| NM_032810    | ATAD1    | 1275 | 1313 | 6.83712456618      |
| NM_032810    | ATAD1    | 868  | 901  | 4.51117887112      |
| NM_032810    | ATAD1    | 1026 | 1071 | 5.01601976263      |
| NM_032810    | ATAD1    | 1374 | 1410 | 4.51117887112      |
| NM_032815    | NFATC2IP |      | 72   | 101 7.97222619092  |
| NM_000683    | ADRA2C   | 818  | 915  | 10.2466122314      |
| NM_025141    | TM2D3    | 315  | 361  | 6.84677898934      |
| NM_025146    | NAA50    | 2110 | 2156 | 4.97697070389      |
| NM_016551    | TM7SF3   | 1343 | 1391 | 6.57126497376      |
| NM_016551    | TM7SF3   | 1235 | 1295 | 6.57510882361      |
| NM_024896    | ERMP1    | 449  | 479  | 7.16250449467      |
| NM_024896    | ERMP1    | 848  | 872  | 6.16251098981      |
| NM_001145064 | GATSL2   | 118  | 188  | 8.46144873809      |
| NM_013319    | UBIAD1   | 860  | 896  | 11.3690621808      |
| NM_013318    | PRRC2B   | 3909 | 3935 | 6.50850474903      |
| NM_024092    | TMEM109  | 1012 | 1054 | 11.9362575831      |
| NM_024092    | TMEM109  | 651  | 721  | 11.9362578191      |
| NM_024092    | TMEM109  | 939  | 974  | 12.3147694423      |
| NM_024092    | TMEM109  | 546  | 589  | 9.53019051479      |
| NM_024092    | TMEM109  | 452  | 512  | 11.1952746247      |
| NM_024092    | TMEM109  | 1419 | 1523 | 12.5212203198      |
| NM_024092    | TMEM109  | 790  | 906  | 12.7017925654      |
| NM_002868    | RAB5B    | 4593 | 4622 | 4.15932796641      |
| NM_002864    | PZP      | 3800 | 3826 | 7.7836798138       |
| NM_002864    | PZP      | 1712 | 1735 | 8.11859570387      |
| NM_002864    | PZP      | 3267 | 3315 | 9.20273491326      |
| NM_002864    | PZP      | 2292 | 2328 | 7.20273490571      |
| NM_002864    | PZP      | 2503 | 2531 | 7.7836798138       |
| NM_002864    | PZP      | 2353 | 2465 | 10.846591103       |
| NM_002864    | PZP      | 159  | 225  | 10.2901977545      |
| NM_024544    | MUL1     | 546  | 641  | 8.32329760492      |
| NM_024541    | C10orf76 |      | 3074 | 3098 9.65588820353 |
| NM_080913    | ASGR2    | 598  | 639  | 1.9990157751       |

|              |          |      |      |                    |
|--------------|----------|------|------|--------------------|
| NM_080913    | ASGR2    | 753  | 833  | 4.66811748521      |
| NM_080913    | ASGR2    | 982  | 1097 | 7.50941973919      |
| NM_080913    | ASGR2    | 650  | 696  | 4.08315497694      |
| NM_080913    | ASGR2    | 267  | 318  | 4.89050317549      |
| NM_080913    | ASGR2    | 366  | 411  | 4.89050317549      |
| NM_080913    | ASGR2    | 849  | 981  | 5.89050990655      |
| NM_019896    | POLE4    | 29   | 55   | 4.86351303303      |
| NM_001085365 | MZT2A    | 265  | 334  | 8.42556404729      |
| NM_130786    | A1BG     | 480  | 545  | 9.27404487767      |
| NM_130786    | A1BG     | 1402 | 1436 | 5.86815132371      |
| NM_014573    | TMEM97   | 533  | 571  | 8.27189560194      |
| NM_014573    | TMEM97   | 214  | 283  | 6.35603480377      |
| NM_001496    | GFRA3    | 594  | 658  | 10.8683740901      |
| NM_005482    | PIGK     | 131  | 199  | 6.12646692364      |
| NM_005482    | PIGK     | 382  | 420  | 7.12646692364      |
| NM_080703    | BAG6     | 1301 | 1348 | 4.12068739245      |
| NM_003621    | PPFIBP2  | 465  | 488  | 8.03938421031      |
| NM_018475    | TMEM165  | 655  | 701  | 4.71986730985      |
| NM_018475    | TMEM165  | 906  | 953  | 8.30500355334      |
| NM_018475    | TMEM165  | 1050 | 1111 | 7.04196915505      |
| NM_018475    | TMEM165  | 1117 | 1176 | 6.30499682983      |
| NM_005669    | REEP5    | 534  | 583  | 4.69064453876      |
| NM_005669    | REEP5    | 168  | 237  | 6.69063781526      |
| NM_005669    | REEP5    | 594  | 665  | 7.27560704703      |
| NM_152523    | CCNYL1   | 160  | 180  | 7.49427306679      |
| NM_152523    | CCNYL1   | 2414 | 2457 | 7.57841227617      |
| NM_030938    | VMP1     | 1078 | 1140 | 6.49528656554      |
| NM_030938    | VMP1     | 637  | 666  | 4.91031733377      |
| NM_030938    | VMP1     | 290  | 325  | 4.90630646465      |
| NM_030938    | VMP1     | 939  | 988  | 6.495286558        |
| NM_001098825 | TMEM91   | 101  | 127  | 8.57411795306      |
| NM_016032    | ZDHC9    | 1438 | 1474 | 5.49715009752      |
| NM_016032    | ZDHC9    | 1276 | 1365 | 6.57727170673      |
| NM_001012    | RPS8     | 179  | 238  | 1.50054650306      |
| NM_015047    | KIAA0090 |      | 1760 | 1797 7.13596766785 |
| NM_015047    | KIAA0090 |      | 1272 | 1321 7.13597439869 |
| NM_015047    | KIAA0090 |      | 786  | 826 6.8138725537   |
| NM_015047    | KIAA0090 |      | 1436 | 1471 5.72990709464 |
| NM_015047    | KIAA0090 |      | 697  | 772 6.81404630402  |
| NM_001017    | RPS13    | 251  | 299  | 2.99261660819      |
| NM_001016    | RPS12    | 99   | 135  | -0.0793571949368   |
| NM_001016    | RPS12    | 135  | 210  | 0.505605541481     |
| NM_001018161 | PON2     | 854  | 885  | 6.91922815507      |
| NM_001018161 | PON2     | 1047 | 1099 | 7.81231295115      |
| NM_001018161 | PON2     | 331  | 359  | 4.02773403117      |
| NM_001018161 | PON2     | 625  | 658  | 6.10785564039      |
| NM_001018161 | PON2     | 115  | 185  | 4.11187300464      |
| NM_001018161 | PON2     | 922  | 972  | 6.69683550536      |
| NM_001018161 | PON2     | 256  | 321  | 7.43380133545      |
| NM_001402    | EEF1A1   | 1585 | 1641 | -0.890699166671    |



|              |          |      |      |                   |
|--------------|----------|------|------|-------------------|
| NM_001402    | EEF1A1   | 1120 | 1162 | -1.89070589018    |
| NM_001402    | EEF1A1   | 636  | 678  | -0.668313468839   |
| NM_001402    | EEF1A1   | 698  | 811  | 1.33169326221     |
| NM_001402    | EEF1A1   | 1488 | 1529 | -3.55980086923    |
| NM_001402    | EEF1A1   | 814  | 906  | 0.611801181408    |
| NM_001402    | EEF1A1   | 919  | 1052 | 1.7722658536      |
| NM_001402    | EEF1A1   | 1174 | 1279 | 1.16819452993     |
| NM_001402    | EEF1A1   | 1320 | 1373 | -0.0162300412054  |
| NM_001402    | EEF1A1   | 1373 | 1416 | -0.3057366584     |
| NM_001402    | EEF1A1   | 499  | 589  | -1.89069916667    |
| NM_001402    | EEF1A1   | 78   | 457  | 3.13904818427     |
| NM_000967    | RPL3     | 275  | 399  | 1.76369372482     |
| NM_000967    | RPL3     | 923  | 1008 | 1.0267281231      |
| NM_133631    | ROB01    | 3041 | 3084 | 7.09542331953     |
| NM_133631    | ROB01    | 2430 | 2501 | 5.5102870685      |
| NM_133631    | ROB01    | 3322 | 3388 | 6.24742617706     |
| NM_000214    | JAG1     | 2438 | 2513 | 6.44429853812     |
| NM_000214    | JAG1     | 1818 | 1847 | 5.44028093795     |
| NM_000214    | JAG1     | 3121 | 3169 | 4.36015932874     |
| NM_000214    | JAG1     | 3713 | 3773 | 5.76622663301     |
| NM_000214    | JAG1     | 1407 | 1464 | 6.25165346018     |
| NM_000214    | JAG1     | 2514 | 2538 | 3.44028093795     |
| NM_000214    | JAG1     | 2859 | 2891 | 5.44429180707     |
| NM_000214    | JAG1     | 1679 | 1752 | 5.02926080293     |
| NM_007243    | NRM      | 943  | 976  | 10.263215598      |
| NM_000968    | RPL4     | 789  | 855  | 2.09507071491     |
| NM_000969    | RPL5     | 125  | 165  | 0.51021365236     |
| NM_017780    | CHD7     | 1    | 46   | 7.77064313126     |
| NM_199334    | THRA     | 16   | 38   | 6.23885534018     |
| NM_001100626 | ERLIN1   | 1023 | 1089 | 5.00026953902     |
| NM_001145144 | SLC1A5   | 552  | 596  | 5.68748234141     |
| NM_001145144 | SLC1A5   | 283  | 420  | 7.14691396027     |
| NM_001145144 | SLC1A5   | 614  | 672  | 6.77494518288     |
| NM_001145144 | SLC1A5   | 1539 | 1595 | 4.68748234163     |
| NM_001145144 | SLC1A5   | 1489 | 1531 | 4.60334313225     |
| NM_001145144 | SLC1A5   | 822  | 1024 | 8.97288456049     |
| NM_001145144 | SLC1A5   | 160  | 252  | 6.49483726369     |
| NM_001145144 | SLC1A5   | 430  | 537  | 6.27244484235     |
| NM_001145144 | SLC1A5   | 1077 | 1218 | 6.14691396027     |
| NM_153045    | C9orf91  | 101  | 133  | 8.46237048764     |
| NM_003945    | ATP6V0E1 |      | 269  | 311 7.86563801659 |
| NM_006372    | SYNCRIP  | 1658 | 1732 | 4.76561809616     |
| NM_001194998 | CEP152   | 2198 | 2221 | 6.80752184514     |
| NM_015544    | TMEM98   | 920  | 968  | 6.82649536468     |
| NM_015544    | TMEM98   | 679  | 719  | 6.74637375547     |
| NM_015544    | TMEM98   | 420  | 499  | 5.8305062338      |
| NM_018641    | CHST12   | 628  | 667  | 6.88784275283     |
| NM_018317    | TBC1D19  | 574  | 594  | 11.5523683697     |
| NM_001130144 | LTBP3    | 2612 | 2662 | 8.21281914541     |
| NM_001130144 | LTBP3    | 3353 | 3427 | 9.03392394895     |

|              |          |      |      |                    |
|--------------|----------|------|------|--------------------|
| NM_001130144 | LTBP3    | 4032 | 4114 | 10.1714274652      |
| NM_033049    | MUC13    | 1552 | 1597 | 9.6964121112       |
| NM_033049    | MUC13    | 1383 | 1435 | 13.950476322       |
| NM_033049    | MUC13    | 1001 | 1064 | 13.950476322       |
| NM_033049    | MUC13    | 1175 | 1215 | 12.5879062426      |
| NM_033049    | MUC13    | 181  | 206  | 9.6964121112       |
| NM_033049    | MUC13    | 1249 | 1303 | 13.1024794155      |
| NM_033049    | MUC13    | 377  | 454  | 10.780551313       |
| NM_033049    | MUC13    | 1216 | 1248 | 11.7765337204      |
| NM_033049    | MUC13    | 921  | 983  | 14.1024794155      |
| NM_033049    | MUC13    | 794  | 893  | 14.028478834       |
| NM_022044    | SDF2L1   | 494  | 530  | 7.95023310238      |
| NM_001099692 | EIF5AL1  | 834  | 874  | 2.17747638773      |
| NM_001099692 | EIF5AL1  | 393  | 472  | 3.84657809029      |
| NM_001110781 | SLC35E2B |      | 1383 | 1414 8.59315102958 |
| NM_147782    | CTSB     | 710  | 750  | 2.22961232793      |
| NM_147782    | CTSB     | 1087 | 1125 | 2.22559473531      |
| NM_147782    | CTSB     | 1128 | 1176 | 0.560510625377     |
| NM_147782    | CTSB     | 682  | 710  | 2.96640417933      |
| NM_147782    | CTSB     | 1185 | 1229 | 2.64464959884      |
| NM_147782    | CTSB     | 1479 | 1520 | 3.22559473531      |
| NM_147782    | CTSB     | 385  | 422  | 3.22943858516      |
| NM_147782    | CTSB     | 871  | 898  | 2.22960560443      |
| NM_147782    | CTSB     | 524  | 631  | 4.55154043037      |
| NM_147782    | CTSB     | 948  | 1048 | 3.96657792965      |
| NM_147782    | CTSB     | 1235 | 1325 | 3.64464983476      |
| NM_145865    | ANKS4B   | 364  | 405  | 6.4688919901       |
| NM_004458    | ACSL4    | 1091 | 1143 | 3.46830283648      |
| NM_004458    | ACSL4    | 1941 | 1978 | 2.46428547223      |
| NM_004458    | ACSL4    | 1243 | 1297 | 4.05326557312      |
| NM_004458    | ACSL4    | 756  | 816  | 3.20526865902      |
| NM_004458    | ACSL4    | 1544 | 1636 | 3.46830307239      |
| NM_004458    | ACSL4    | 1642 | 1709 | 0.879322971506     |
| NM_004450    | ERH      | 106  | 151  | 5.28652467002      |
| NM_004185    | WNT2B    | 1477 | 1500 | 13.2273066011      |
| NM_152734    | C6orf89  | 574  | 640  | 7.36146846145      |
| NM_182760    | SUMF1    | 927  | 964  | 10.4980628543      |
| NM_182767    | SLC6A15  | 2342 | 2381 | 13.4576510168      |
| NM_001142276 | APLP2    | 2342 | 2398 | 2.62518742242      |
| NM_001142276 | APLP2    | 1696 | 1736 | 0.95608571231      |
| NM_001142276 | APLP2    | 2466 | 2579 | 3.62518742242      |
| NM_001142276 | APLP2    | 1632 | 1677 | 2.62518742241      |
| NM_001142276 | APLP2    | 1531 | 1608 | 3.36215301658      |
| NM_001142276 | APLP2    | 477  | 531  | 3.49965654033      |
| NM_001142276 | APLP2    | 408  | 452  | 2.54104821303      |
| NM_001142276 | APLP2    | 1175 | 1240 | 3.49965654033      |
| NM_001142276 | APLP2    | 548  | 596  | 1.04022492169      |
| NM_001142276 | APLP2    | 616  | 646  | 1.04021819064      |
| NM_001142276 | APLP2    | 1755 | 1797 | 1.62518742219      |
| NM_001142276 | APLP2    | 332  | 406  | 3.62518742242      |

|              |             |      |      |                    |
|--------------|-------------|------|------|--------------------|
| NM_001142276 | APLP2       | 997  | 1085 | 2.84757984375      |
| NM_001142276 | APLP2       | 874  | 984  | 4.43254234447      |
| NM_001142276 | APLP2       | 1858 | 1946 | 3.49965654033      |
| NM_001142276 | APLP2       | 73   | 129  | 1.62518742219      |
| NM_001142276 | APLP2       | 755  | 858  | 4.12768776294      |
| NM_001142276 | APLP2       | 1979 | 2112 | 4.89820591682      |
| NM_001142276 | APLP2       | 1277 | 1412 | 4.43254234447      |
| NM_004984    | KIF5A       | 1055 | 1088 | 8.05899549595      |
| NM_032832    | LRP11       | 1725 | 1782 | 8.75441794164      |
| NM_032839    | DIRC2       | 1080 | 1127 | 9.59741235705      |
| NM_014712    | SETD1A      | 627  | 646  | 7.86080351473      |
| NM_001012478 | U2AF2       | 2211 | 2263 | 5.36000039545      |
| NM_014713    | LAPTM4A     | 740  | 782  | 6.23358502573      |
| NM_014713    | LAPTM4A     | 699  | 739  | 3.69001419771      |
| NM_014713    | LAPTM4A     | 625  | 670  | 4.77415317117      |
| NM_014713    | LAPTM4A     | 822  | 910  | 7.23358502573      |
| NM_014713    | LAPTM4A     | 1653 | 1696 | 5.09206390181      |
| NM_014713    | LAPTM4A     | 1037 | 1120 | 6.6810440027       |
| NM_014713    | LAPTM4A     | 914  | 1019 | 7.29771536315      |
| NM_203372    | ACSL3       | 2464 | 2495 | 0.847576307785     |
| NM_203372    | ACSL3       | 283  | 339  | 1.93171528125      |
| NM_203372    | ACSL3       | 1498 | 1540 | 4.01750130923      |
| NM_203372    | ACSL3       | 1589 | 1642 | 3.93170878612      |
| NM_203372    | ACSL3       | 719  | 748  | 0.931541766851     |
| NM_203372    | ACSL3       | 2258 | 2289 | 0.927697916996     |
| NM_203372    | ACSL3       | 1991 | 2061 | 4.51667801789      |
| NM_203372    | ACSL3       | 553  | 612  | 2.51667801788      |
| NM_203372    | ACSL3       | 1730 | 1836 | 4.10164051861      |
| NM_002117    | HLA-C       | 612  | 688  | 7.57453331656      |
| NM_002117    | HLA-C       | 484  | 543  | 4.98957081584      |
| NM_002117    | HLA-C       | 202  | 230  | 3.40460831511      |
| NM_002117    | HLA-C       | 414  | 458  | 4.40460830757      |
| NM_002117    | HLA-C       | 986  | 1019 | 3.32046910573      |
| NM_002117    | HLA-C       | 349  | 414  | 5.72653641         |
| NM_002117    | HLA-C       | 726  | 897  | 7.65253582856      |
| NM_002800    | PSMB9       | 144  | 165  | 10.6573818536      |
| NM_002803    | PSMC2       | 881  | 926  | 3.68710227261      |
| NM_002809    | PSMD3       | 1709 | 1769 | 5.55207302073      |
| NM_147150    | PALM2-AKAP2 |      | 2291 | 2311 7.89390938075 |
| NM_003601    | SMARCA5     | 3158 | 3179 | 3.53436832961      |
| NM_003609    | HIRIP3      | 247  | 267  | 6.982037953        |
| NM_014339    | IL17RA      | 1018 | 1050 | 11.8086122205      |
| NM_014330    | PPP1R15A    |      | 831  | 874 5.80963193466  |
| NM_001017974 | P4HA2       | 623  | 669  | 3.98311890584      |
| NM_001017974 | P4HA2       | 810  | 873  | 6.98713650601      |
| NM_015686    | FAM155B     | 1546 | 1566 | 11.5702372144      |
| NM_001144062 | COPB1       | 693  | 760  | 5.95597338567      |
| NM_001098800 | MAGED4      | 2055 | 2094 | 4.48328075873      |
| NM_001098805 | ANKRD20A4   |      | 7    | 28 13.956270174    |
| NM_001130082 | PLXNB1      | 1170 | 1242 | 7.37569558897      |

|              |          |      |      |                    |
|--------------|----------|------|------|--------------------|
| NM_012482    | ZNF281   | 87   | 116  | 6.25954644357      |
| NM_001114397 | DHX36    | 192  | 239  | 6.28169017452      |
| NM_000405    | GM2A     | 299  | 346  | 9.34087627712      |
| NM_030755    | TMX1     | 799  | 855  | 4.29471659523      |
| NM_030755    | TMX1     | 319  | 409  | 5.0316821894       |
| NM_030755    | TMX1     | 224  | 314  | 5.51710901657      |
| NM_030755    | TMX1     | 580  | 626  | 6.16918571314      |
| NM_030755    | TMX1     | 901  | 954  | 5.03150843908      |
| NM_030755    | TMX1     | 474  | 522  | 4.29470986418      |
| NM_030755    | TMX1     | 632  | 741  | 6.70975409451      |
| NM_030755    | TMX1     | 157  | 207  | 3.70573649434      |
| NM_017762    | MTMR10   | 66   | 84   | 7.24443157875      |
| NM_017768    | LRRC40   | 753  | 776  | 9.12234762412      |
| NM_001198682 | NME2     | 320  | 402  | 2.42628997353      |
| NM_000239    | LYZ      | 27   | 54   | 0.555764138507     |
| NM_000239    | LYZ      | 1354 | 1394 | 0.814780951717     |
| NM_000239    | LYZ      | 814  | 890  | -1.76616394883     |
| NM_000239    | LYZ      | 1250 | 1342 | 2.48176356461      |
| NM_000239    | LYZ      | 332  | 537  | 5.31065164822      |
| NM_000239    | LYZ      | 541  | 575  | 1.81879854434      |
| NM_000239    | LYZ      | 92   | 226  | 4.66010080587      |
| NM_000239    | LYZ      | 226  | 312  | 3.23383605117      |
| NM_001135770 | PVR      | 1332 | 1385 | 8.9949276037       |
| NM_001135770 | PVR      | 567  | 631  | 6.91480599449      |
| NM_001135770 | PVR      | 947  | 1057 | 10.699384922       |
| NM_000235    | LIPA     | 1366 | 1394 | 5.01205773972      |
| NM_000235    | LIPA     | 604  | 672  | 5.51123444838      |
| NM_000235    | LIPA     | 1144 | 1179 | 6.6811594496       |
| NM_000235    | LIPA     | 1048 | 1101 | 5.50721684821      |
| NM_000235    | LIPA     | 1288 | 1334 | 5.83316254327      |
| NM_000235    | LIPA     | 976  | 1038 | 6.0961969491       |
| NM_000236    | LIPC     | 793  | 850  | 7.58951711417      |
| NM_000236    | LIPC     | 472  | 535  | 8.1746533652       |
| NM_000236    | LIPC     | 726  | 770  | 7.82747974999      |
| NM_000236    | LIPC     | 314  | 370  | 8.1746533652       |
| NM_000236    | LIPC     | 610  | 662  | 7.58969086426      |
| NM_000236    | LIPC     | 378  | 436  | 7.9076013592       |
| NM_000236    | LIPC     | 231  | 301  | 7.17447961489      |
| NM_024121    | TMEM185B |      | 975  | 1043 12.2610343994 |
| NM_001080452 | GPR108   | 1571 | 1643 | 8.13534482408      |
| NM_006392    | NOP56    | 1327 | 1384 | 2.32248388627      |
| NM_006392    | NOP56    | 535  | 560  | 3.23851842721      |
| NM_006395    | ATG7     | 1228 | 1249 | 8.07805005079      |
| NM_005852    | CHD3     | 6473 | 6494 | 7.88209377954      |
| NM_005857    | ZMPSTE24 |      | 517  | 570 9.05580979165  |
| NM_005857    | ZMPSTE24 |      | 1608 | 1638 7.73387496571 |
| NM_005857    | ZMPSTE24 |      | 1544 | 1587 8.73388169675 |
| NM_005857    | ZMPSTE24 |      | 813  | 858 8.54123661882  |
| NM_005857    | ZMPSTE24 |      | 1179 | 1248 7.73388169654 |
| NM_005857    | ZMPSTE24 |      | 452  | 486 6.73388168921  |

|              |           |      |      |               |                |
|--------------|-----------|------|------|---------------|----------------|
| NM_005859    | PURA      | 4464 | 4483 | 5.36547054778 |                |
| NM_005859    | PURA      | 161  | 210  | 6.44960975717 |                |
| NM_021998    | ZNF711    | 126  | 164  | 6.45444955698 |                |
| NM_018622    | PARL      | 104  | 128  | 7.36338322968 |                |
| NM_002496    | NDUFS8    | 276  | 332  | 5.82293644819 |                |
| NM_031243    | HNRNPA2B1 |      | 2929 | 2948          | -0.13087198742 |
| NM_031243    | HNRNPA2B1 |      | 144  | 197           | 2.67263908478  |
| NM_031243    | HNRNPA2B1 |      | 907  | 945           | 0.869301526979 |
| NM_031243    | HNRNPA2B1 |      | 317  | 427           | 3.32873338153  |
| NM_012073    | CCT5      | 1024 | 1070 | 3.02767564671 |                |
| NM_012073    | CCT5      | 1736 | 1834 | 4.02767564671 |                |
| NM_012073    | CCT5      | 312  | 372  | 2.61263814744 |                |
| NM_012073    | CCT5      | 926  | 1000 | 2.03151949657 |                |
| NM_001083538 | POTEE     | 2461 | 2495 | 9.03758799294 |                |
| NM_001178063 | C2        | 324  | 363  | 3.47418226823 |                |
| NM_001178063 | C2        | 479  | 522  | 4.12700865324 |                |
| NM_001178063 | C2        | 410  | 443  | 1.88921953182 |                |
| NM_001178063 | C2        | 166  | 248  | 4.21114786262 |                |
| NM_001178063 | C2        | 1503 | 1574 | 5.05914476918 |                |
| NM_001178063 | C2        | 1199 | 1245 | 2.88921976019 |                |
| NM_001178063 | C2        | 1879 | 1943 | 2.88520216756 |                |
| NM_001178063 | C2        | 1008 | 1058 | 3.47016466828 |                |
| NM_001178063 | C2        | 1274 | 1349 | 4.21114786262 |                |
| NM_001178063 | C2        | 1703 | 1774 | 4.88904601742 |                |
| NM_001178063 | C2        | 581  | 710  | 5.58965948588 |                |
| NM_001178063 | C2        | 714  | 794  | 4.21114786262 |                |
| NM_004435    | ENDOG     | 274  | 305  | 9.15601427124 |                |
| NM_004431    | EPHA2     | 2402 | 2454 | 8.62293364067 |                |
| NM_004431    | EPHA2     | 2339 | 2384 | 7.20789590547 |                |
| NM_004431    | EPHA2     | 2764 | 2828 | 9.62293364067 |                |
| NM_004431    | EPHA2     | 440  | 504  | 9.08236525931 |                |
| NM_004431    | EPHA2     | 2103 | 2144 | 5.62293340475 |                |
| NM_004431    | EPHA2     | 1754 | 1828 | 7.62275989035 |                |
| NM_004431    | EPHA2     | 2972 | 3009 | 7.20788941034 |                |
| NM_004431    | EPHA2     | 1181 | 1236 | 6.62275989035 |                |
| NM_004431    | EPHA2     | 1601 | 1648 | 8.12375693201 |                |
| NM_004431    | EPHA2     | 2543 | 2569 | 6.53879443129 |                |
| NM_004431    | EPHA2     | 365  | 439  | 7.62293340475 |                |
| NM_004431    | EPHA2     | 72   | 154  | 7.94485500451 |                |
| NM_201442    | C1S       | 1890 | 1920 | 9.76935906403 |                |
| NM_201442    | C1S       | 1416 | 1466 | 10.3583391649 |                |
| NM_201442    | C1S       | 1546 | 1615 | 9.35432156475 |                |
| NM_201442    | C1S       | 1758 | 1789 | 8.76935906403 |                |
| NM_201442    | C1S       | 524  | 559  | 7.77336993315 |                |
| NM_201442    | C1S       | 1319 | 1364 | 10.095298028  |                |
| NM_006948    | HSPA13    | 731  | 781  | 6.09795366473 |                |
| NM_006948    | HSPA13    | 1496 | 1537 | 4.691886368   |                |
| NM_006948    | HSPA13    | 1077 | 1123 | 7.36098807811 |                |
| NM_006948    | HSPA13    | 623  | 668  | 7.47646529553 |                |
| NM_006948    | HSPA13    | 1396 | 1422 | 5.27684886873 |                |

|              |           |      |      |                    |
|--------------|-----------|------|------|--------------------|
| NM_006947    | SRP72     | 629  | 697  | 5.67415422052      |
| NM_020205    | OTUD7B    | 1971 | 2037 | 7.62151499281      |
| NM_020759    | STARD9    | 976  | 997  | 9.48760278125      |
| NM_032859    | ABHD13    | 728  | 813  | 10.7313836324      |
| NM_032853    | MUM1      | 2    | 45   | 7.5831936547       |
| NM_016657    | KDELR3    | 705  | 771  | 10.420663226       |
| NM_016657    | KDELR3    | 585  | 663  | 10.9352366348      |
| NM_000398    | CYB5R3    | 773  | 803  | 4.65584254741      |
| NM_000398    | CYB5R3    | 715  | 759  | 6.82576754885      |
| NM_000392    | ABCC2     | 1023 | 1062 | 4.27321431181      |
| NM_000391    | TPP1      | 606  | 666  | 8.43624578729      |
| NM_000391    | TPP1      | 683  | 726  | 7.75817388217      |
| NM_000391    | TPP1      | 223  | 264  | 6.43624578729      |
| NM_000391    | TPP1      | 1338 | 1363 | 7.02103453769      |
| NM_000391    | TPP1      | 1022 | 1055 | 8.43607203697      |
| NM_000391    | TPP1      | 1805 | 1848 | 8.52203157935      |
| NM_000391    | TPP1      | 296  | 341  | 7.43624578729      |
| NM_000391    | TPP1      | 1592 | 1641 | 7.43222818711      |
| NM_000391    | TPP1      | 406  | 469  | 8.89567740592      |
| NM_000391    | TPP1      | 557  | 584  | 5.3521065779       |
| NM_000391    | TPP1      | 1068 | 1113 | 6.43222818711      |
| NM_203355    | CTAGE5    | 1128 | 1150 | 2.02279053881      |
| NM_203355    | CTAGE5    | 1155 | 1227 | 3.68787464874      |
| NM_003840    | TNFRSF10D |      | 997  | 1034 3.93620857927 |
| NM_003840    | TNFRSF10D |      | 523  | 596 7.52117781105  |
| NM_024581    | FAM184A   | 3534 | 3556 | 8.19816939906      |
| NM_001130996 | HMGCR     | 1208 | 1288 | 8.3119749926       |
| NM_001130996 | HMGCR     | 894  | 922  | 5.72683874156      |
| NM_001130996 | HMGCR     | 773  | 824  | 7.14187624084      |
| NM_001130996 | HMGCR     | 277  | 308  | 6.14187624084      |
| NM_001130996 | HMGCR     | 654  | 701  | 6.72701249187      |
| NM_001130996 | HMGCR     | 924  | 963  | 6.46397807849      |
| NM_001130996 | HMGCR     | 2196 | 2227 | 6.94538731304      |
| NM_001130996 | HMGCR     | 1441 | 1498 | 7.14204999115      |
| NM_001130996 | HMGCR     | 1581 | 1638 | 7.60148160979      |
| NM_001130996 | HMGCR     | 1772 | 1838 | 8.46397808604      |
| NM_001130996 | HMGCR     | 1017 | 1062 | 6.46397808582      |
| NM_153369    | KIAA1919  |      | 555  | 583 8.71319866822  |
| NM_003667    | LGR5      | 1854 | 1914 | 7.96211957576      |
| NM_003667    | LGR5      | 1978 | 2019 | 7.96211284472      |
| NM_003664    | AP3B1     | 2351 | 2371 | 7.68775612328      |
| NM_018434    | RNF130    | 231  | 270  | 6.67548631308      |
| NM_002823    | PTMA      | 299  | 366  | 2.87696194777      |
| NM_002823    | PTMA      | 154  | 216  | 4.29200617055      |
| NM_002823    | PTMA      | 824  | 878  | 3.29199944704      |
| NM_002823    | PTMA      | 223  | 261  | 3.61376052267      |
| NM_002823    | PTMA      | 444  | 530  | 3.87696867882      |
| NM_002390    | ADAM11    | 800  | 818  | 13.1895153766      |
| NM_001190791 | ZNF317    | 2793 | 2811 | 7.26439043228      |
| NM_001014975 | CFH       | 1169 | 1217 | 13.3056316832      |

|              |        |      |      |               |
|--------------|--------|------|------|---------------|
| NM_001014975 | CFH    | 1444 | 1507 | 12.4982767612 |
| NM_001014975 | CFH    | 989  | 1021 | 12.0792216617 |
| NM_001014975 | CFH    | 612  | 671  | 10.494259161  |
| NM_001014975 | CFH    | 534  | 558  | 11.4141375518 |
| NM_001014975 | CFH    | 1248 | 1276 | 10.4141375518 |
| NM_032211    | LOXL4  | 809  | 842  | 10.2716250366 |
| NM_032211    | LOXL4  | 1908 | 1977 | 10.079153709  |
| NM_032211    | LOXL4  | 1154 | 1226 | 8.85658753731 |
| NM_032211    | LOXL4  | 410  | 497  | 9.27162503658 |
| NM_139125    | MASP1  | 1389 | 1459 | 9.13939737839 |
| NM_139125    | MASP1  | 988  | 1041 | 8.36178306868 |
| NM_139125    | MASP1  | 622  | 672  | 8.13922362808 |
| NM_139125    | MASP1  | 955  | 984  | 6.55442814662 |
| NM_139125    | MASP1  | 917  | 950  | 6.55426112735 |
| NM_139125    | MASP1  | 1353 | 1389 | 8.13922362808 |
| NM_139125    | MASP1  | 776  | 838  | 5.55443487745 |
| NM_139125    | MASP1  | 2475 | 2536 | 6.55443487745 |
| NM_139125    | MASP1  | 737  | 770  | 7.55442814662 |
| NM_139125    | MASP1  | 1461 | 1509 | 8.36178979973 |
| NM_139125    | MASP1  | 1069 | 1104 | 6.55426112735 |
| NM_001017956 | OS9    | 1826 | 1897 | 6.63012875731 |
| NM_001017956 | OS9    | 1538 | 1596 | 3.46019702482 |
| NM_001017956 | OS9    | 2256 | 2286 | 4.04499250627 |
| NM_001017956 | OS9    | 1097 | 1208 | 4.78213185076 |
| NM_001017956 | OS9    | 524  | 586  | 5.46020375587 |
| NM_001017956 | OS9    | 1360 | 1401 | 4.04499250627 |
| NM_001017956 | OS9    | 656  | 688  | 2.46003000555 |
| NM_001017956 | OS9    | 484  | 516  | 3.46003000555 |
| NM_001017956 | OS9    | 1965 | 2063 | 5.04516625659 |
| NM_001017956 | OS9    | 2079 | 2135 | 4.04516625659 |
| NM_001017956 | OS9    | 1314 | 1342 | 3.46003000555 |
| NM_001017956 | OS9    | 757  | 856  | 6.78213185076 |
| NM_001017956 | OS9    | 1701 | 1752 | 4.46019702482 |
| NM_001017956 | OS9    | 234  | 407  | 6.85252117865 |
| NM_001017956 | OS9    | 864  | 950  | 5.78213185076 |
| NM_001017956 | OS9    | 1406 | 1538 | 6.46020375587 |
| NM_001163817 | DHCR7  | 575  | 610  | 6.80458468809 |
| NM_001163817 | DHCR7  | 326  | 361  | 6.12651254707 |
| NM_001163817 | DHCR7  | 1463 | 1498 | 5.38954718881 |
| NM_001163817 | DHCR7  | 465  | 528  | 7.12651278299 |
| NM_001163817 | DHCR7  | 1600 | 1648 | 6.38954718882 |
| NM_001163817 | DHCR7  | 708  | 762  | 6.12650605193 |
| NM_001163817 | DHCR7  | 113  | 173  | 5.38954045777 |
| NM_001163817 | DHCR7  | 1045 | 1239 | 9.53250514266 |
| NM_001163817 | DHCR7  | 905  | 1009 | 7.12651278299 |
| NM_152564    | VPS13B | 8023 | 8043 | 9.4832591469  |
| NM_003337    | UBE2B  | 751  | 771  | 5.4462757708  |
| NM_001143947 | UNC93A | 461  | 492  | 5.61927904544 |
| NM_001143947 | UNC93A | 1938 | 1959 | 5.53915743623 |
| NM_001143947 | UNC93A | 614  | 669  | 7.20825891042 |

|              |          |      |      |                    |
|--------------|----------|------|------|--------------------|
| NM_001143947 | UNC93A   | 1312 | 1363 | 7.20808539602      |
| NM_001143947 | UNC93A   | 995  | 1035 | 6.61927904544      |
| NM_001143947 | UNC93A   | 811  | 837  | 5.53915743623      |
| NM_001143947 | UNC93A   | 1037 | 1140 | 8.43065156767      |
| NM_001165416 | LDHA     | 872  | 937  | 0.00853470074636   |
| NM_001165416 | LDHA     | 389  | 418  | -0.732448493371    |
| NM_004339    | PTTG1IP  | 417  | 463  | 3.06018196981      |
| NM_004339    | PTTG1IP  | 469  | 498  | 2.73808013216      |
| NM_004339    | PTTG1IP  | 508  | 626  | 4.19768550111      |
| NM_004339    | PTTG1IP  | 643  | 767  | 3.3232163832       |
| NM_001142403 | CD164    | 460  | 515  | 6.75286733313      |
| NM_001142403 | CD164    | 615  | 667  | 8.5603960055       |
| NM_173344    | ST3GAL1  | 3731 | 3750 | 6.17490077171      |
| NM_016297    | PCYOX1   | 1529 | 1597 | 6.26515157096      |
| NM_016297    | PCYOX1   | 350  | 459  | 6.04677674979      |
| NM_016297    | PCYOX1   | 519  | 564  | 6.46181424907      |
| NM_016297    | PCYOX1   | 1197 | 1254 | 5.46181401315      |
| NM_004371    | COPA     | 2884 | 2957 | 5.5145338198       |
| NM_004373    | COX6A1   | 404  | 441  | 5.04638172967      |
| NM_004373    | COX6A1   | 35   | 88   | 6.04638173722      |
| NM_004374    | COX6C    | 517  | 541  | 2.25649413048      |
| NM_004374    | COX6C    | 564  | 613  | 1.17235515701      |
| NM_198391    | FLRT3    | 1976 | 2028 | 10.814107605       |
| NM_198391    | FLRT3    | 963  | 1010 | 12.5917151912      |
| NM_198391    | FLRT3    | 1910 | 1936 | 8.00273509028      |
| NM_198391    | FLRT3    | 1185 | 1238 | 10.0067526902      |
| NM_198391    | FLRT3    | 1730 | 1774 | 9.59170846012      |
| NM_198391    | FLRT3    | 1432 | 1511 | 9.59171519118      |
| NM_198391    | FLRT3    | 2096 | 2131 | 9.587697591        |
| NM_198391    | FLRT3    | 135  | 185  | 9.59171519095      |
| NM_198391    | FLRT3    | 1780 | 1828 | 10.591715191       |
| NM_198391    | FLRT3    | 2427 | 2493 | 10.8141076125      |
| NM_198391    | FLRT3    | 1524 | 1610 | 9.59171519118      |
| NM_198391    | FLRT3    | 2150 | 2258 | 11.3286807853      |
| NM_144564    | SLC39A3  | 618  | 653  | 8.14421846604      |
| NM_144564    | SLC39A3  | 792  | 858  | 9.22835094437      |
| NM_000257    | MYH7     | 1419 | 1439 | 13.1981121427      |
| NM_000253    | MTTP     | 1852 | 1892 | 5.91334225638      |
| NM_000253    | MTTP     | 1661 | 1694 | 4.10196973415      |
| NM_000253    | MTTP     | 2626 | 2651 | 4.02184812494      |
| NM_207380    | C15orf52 |      | 5130 | 5167 14.3330230554 |
| NM_207380    | C15orf52 |      | 5170 | 5207 10.7480538236 |
| NM_001080472 | FITM2    | 585  | 627  | 5.28978658406      |
| NM_000876    | IGF2R    | 8869 | 8934 | 6.38454124941      |
| NM_000876    | IGF2R    | 552  | 650  | 6.91505620202      |
| NM_000876    | IGF2R    | 734  | 782  | 6.21461648388      |
| NM_000876    | IGF2R    | 338  | 385  | 5.53653784772      |
| NM_000876    | IGF2R    | 2495 | 2531 | 3.1304772745       |
| NM_000876    | IGF2R    | 2573 | 2615 | 6.91505620202      |
| NM_000876    | IGF2R    | 6742 | 6795 | 5.79957225355      |



|           |        |      |      |               |
|-----------|--------|------|------|---------------|
| NM_000876 | IGF2R  | 5014 | 5067 | 4.79556138443 |
| NM_000876 | IGF2R  | 4924 | 5000 | 6.02197140594 |
| NM_000876 | IGF2R  | 3573 | 3623 | 4.21461647633 |
| NM_000876 | IGF2R  | 858  | 913  | 6.38454148532 |
| NM_000876 | IGF2R  | 3624 | 3684 | 4.7995789846  |
| NM_000876 | IGF2R  | 2648 | 2681 | 4.71543977522 |
| NM_000876 | IGF2R  | 6927 | 6965 | 4.79957898438 |
| NM_000876 | IGF2R  | 6152 | 6189 | 6.02197140594 |
| NM_000876 | IGF2R  | 4774 | 4872 | 6.7995789846  |
| NM_000876 | IGF2R  | 2326 | 2369 | 5.21461648366 |
| NM_000876 | IGF2R  | 2194 | 2229 | 5.7995789846  |
| NM_000876 | IGF2R  | 5623 | 5730 | 7.53654457877 |
| NM_000876 | IGF2R  | 1925 | 1961 | 5.1304772745  |
| NM_000876 | IGF2R  | 4355 | 4391 | 5.53654457122 |
| NM_000876 | IGF2R  | 6048 | 6089 | 6.02179765562 |
| NM_000876 | IGF2R  | 1639 | 1677 | 5.53637082845 |
| NM_000876 | IGF2R  | 6699 | 6728 | 3.1304772745  |
| NM_000876 | IGF2R  | 7233 | 7272 | 4.79957897705 |
| NM_000876 | IGF2R  | 655  | 692  | 5.21460975283 |
| NM_000876 | IGF2R  | 6637 | 6681 | 4.79940523429 |
| NM_000876 | IGF2R  | 4714 | 4754 | 4.21460975283 |
| NM_000876 | IGF2R  | 3062 | 3110 | 3.21444273356 |
| NM_000876 | IGF2R  | 2130 | 2157 | 5.21059888371 |
| NM_000876 | IGF2R  | 5446 | 5471 | 3.1304772745  |
| NM_000876 | IGF2R  | 5539 | 5586 | 4.79957874869 |
| NM_000876 | IGF2R  | 5807 | 5863 | 5.21059888371 |
| NM_000876 | IGF2R  | 3892 | 3950 | 6.38454148532 |
| NM_000876 | IGF2R  | 1224 | 1268 | 6.38453475427 |
| NM_000876 | IGF2R  | 1558 | 1614 | 4.21460975283 |
| NM_000876 | IGF2R  | 7580 | 7622 | 4.79957897705 |
| NM_000876 | IGF2R  | 1461 | 1537 | 6.21460975283 |
| NM_000876 | IGF2R  | 6414 | 6462 | 6.02197140594 |
| NM_000876 | IGF2R  | 1835 | 1880 | 4.1304772745  |
| NM_000876 | IGF2R  | 5481 | 5538 | 5.79957897705 |
| NM_000876 | IGF2R  | 5932 | 5979 | 6.21461647633 |
| NM_000876 | IGF2R  | 3703 | 3832 | 7.7995789846  |
| NM_000876 | IGF2R  | 4220 | 4307 | 6.38454148532 |
| NM_000876 | IGF2R  | 6247 | 6343 | 5.21461624796 |
| NM_000876 | IGF2R  | 2249 | 2295 | 3.21059888371 |
| NM_000876 | IGF2R  | 1078 | 1161 | 5.21461648388 |
| NM_000876 | IGF2R  | 2866 | 2949 | 5.53654457855 |
| NM_000876 | IGF2R  | 6969 | 7080 | 4.7995789846  |
| NM_000876 | IGF2R  | 6812 | 6858 | 5.21461647633 |
| NM_000876 | IGF2R  | 3353 | 3525 | 6.38454148532 |
| NM_000876 | IGF2R  | 4444 | 4529 | 5.53654457877 |
| NM_000875 | IGF1R  | 3771 | 3802 | 7.93648400853 |
| NM_024640 | YRDC   | 617  | 637  | 6.97410241712 |
| NM_178557 | NAT8L  | 4082 | 4108 | 12.5121131162 |
| NM_032682 | FOXP1  | 2874 | 2894 | 4.59646648255 |
| NM_014270 | SLC7A9 | 1063 | 1131 | 13.3929237535 |

|              |              |      |      |                   |
|--------------|--------------|------|------|-------------------|
| NM_014275    | MGAT4B       | 1940 | 2008 | 5.61291650895     |
| NM_014275    | MGAT4B       | 841  | 962  | 5.61292323978     |
| NM_015274    | MAN2B2       | 2410 | 2463 | 11.2591606867     |
| NM_015274    | MAN2B2       | 143  | 167  | 10.339282296      |
| NM_001005291 | SREBF1       | 1919 | 1979 | 5.48238312566     |
| NM_001005291 | SREBF1       | 1309 | 1348 | 7.48238312566     |
| NM_001005291 | SREBF1       | 2214 | 2285 | 7.48640072584     |
| NM_001005291 | SREBF1       | 2691 | 2737 | 7.80431122055     |
| NM_001005291 | SREBF1       | 3182 | 3221 | 6.48622697552     |
| NM_001005291 | SREBF1       | 1460 | 1547 | 8.07136321901     |
| NM_001005291 | SREBF1       | 2892 | 2976 | 9.18684044398     |
| NM_001005291 | SREBF1       | 2116 | 2206 | 8.07136322655     |
| NM_001935    | DPP4         | 2465 | 2530 | 4.78018000431     |
| NM_001935    | DPP4         | 1964 | 2006 | 4.3651360099      |
| NM_001935    | DPP4         | 1245 | 1351 | 4.78018024001     |
| NM_004145    | MYO9B        | 3053 | 3075 | 8.41208603148     |
| NM_001399    | EDA          | 27   | 48   | 10.0509459059     |
| NM_001428    | EN01         | 738  | 830  | 0.0572690427642   |
| NM_001428    | EN01         | 1175 | 1223 | -0.817200075152   |
| NM_001428    | EN01         | 432  | 494  | -3.48630178526    |
| NM_001428    | EN01         | 1697 | 1734 | -2.40233632619    |
| NM_001428    | EN01         | 1236 | 1265 | -2.40216930693    |
| NM_001428    | EN01         | 1315 | 1372 | -1.82121767532    |
| NM_001428    | EN01         | 603  | 646  | -2.48630178526    |
| NM_022731    | NUCKS1       | 437  | 515  | 3.8976222796      |
| NM_022735    | ACBD3        | 1171 | 1190 | 6.35272215241     |
| NM_022736    | MFSD1        | 1268 | 1338 | 10.5191165639     |
| NM_022082    | SLC17A9      | 711  | 784  | 7.83243075211     |
| NM_018979    | WNK1         | 6812 | 6834 | 5.30310188857     |
| NM_018979    | WNK1         | 1351 | 1406 | 6.38322349778     |
| NM_015497    | TMEM87A      | 1051 | 1119 | 7.13784481927     |
| NM_015497    | TMEM87A      | 958  | 1012 | 6.72665116984     |
| NM_020774    | MIB1         | 199  | 229  | 4.98304157048     |
| NM_001643    | APOA2        | 229  | 370  | 5.41788152501     |
| NM_001643    | APOA2        | 141  | 224  | 4.39950299569     |
| NM_001643    | APOA2        | 388  | 471  | 2.57353239547     |
| NM_001643    | APOA2        | 0    | 136  | 4.36202829027     |
| NM_005105    | RBM8A        | 89   | 147  | 4.19657636498     |
| NM_001199781 | POC1B-GALNT4 |      | 205  | 225 9.53255265055 |
| NM_022551    | RPS18        | 203  | 258  | 0.701341464034    |
| NM_022551    | RPS18        | 341  | 369  | -1.62460423103    |
| NM_144976    | ZNF564       | 1401 | 1421 | 7.78356193924     |
| NM_001164280 | SLC37A4      | 765  | 806  | 8.66444762076     |
| NM_001164280 | SLC37A4      | 908  | 983  | 7.66444762076     |
| NM_006260    | DNAJC3       | 664  | 711  | 6.31643811012     |
| NM_013402    | FADS1        | 1164 | 1221 | 9.87479018613     |
| NM_013402    | FADS1        | 1019 | 1052 | 7.87478995043     |
| NM_001164754 | ASPH         | 1210 | 1251 | 3.71661798788     |
| NM_001164754 | ASPH         | 927  | 974  | 3.71679173819     |
| NM_001164754 | ASPH         | 101  | 132  | 0.825297606752    |

|              |          |      |      |                    |
|--------------|----------|------|------|--------------------|
| NM_001164754 | ASPH     | 1042 | 1101 | 3.49439931663      |
| NM_001164754 | ASPH     | 756  | 882  | 6.26698882075      |
| NM_001164754 | ASPH     | 586  | 644  | 2.90541921596      |
| NM_001164754 | ASPH     | 372  | 579  | 6.33570157084      |
| NM_144604    | ZC3H18   | 326  | 351  | 5.30894214228      |
| NM_001205206 | SLC19A1  | 1383 | 1435 | 10.1247949827      |
| NM_176096    | CDK5RAP3 |      | 986  | 1004 4.58631852717 |
| NM_001024401 | SBK1     | 4070 | 4093 | 11.0938168645      |
| NM_001122870 | PPM1M    | 970  | 997  | 7.82576086482      |
| NM_001100412 | DROSHA   | 5197 | 5217 | 6.7610385561       |
| NM_014045    | LRP10    | 1267 | 1332 | 8.6874648807       |
| NM_014045    | LRP10    | 1725 | 1844 | 8.81299577033      |
| NM_014045    | LRP10    | 1559 | 1667 | 8.39795827105      |
| NM_014045    | LRP10    | 2564 | 2646 | 8.03538819167      |
| NM_014049    | ACAD9    | 1704 | 1746 | 8.64620637229      |
| NM_001035254 | FAM102A  | 1150 | 1172 | 8.25406169523      |
| NM_003139    | SRPR     | 391  | 462  | 4.63742657874      |
| NM_003139    | SRPR     | 1021 | 1095 | 5.05246407801      |
| NM_003139    | SRPR     | 760  | 814  | 4.55329410041      |
| NM_003139    | SRPR     | 1186 | 1253 | 4.04845320889      |
| NM_004643    | PABPN1   | 1277 | 1307 | 1.8533283072       |
| NM_003645    | SLC27A2  | 1223 | 1274 | 7.30146138801      |
| NM_003641    | IFITM1   | 413  | 469  | 7.90413533932      |
| NM_003641    | IFITM1   | 342  | 411  | 8.90413533933      |
| NM_006455    | LEPREL4  | 894  | 922  | 6.09898971446      |
| NM_014992    | DAAM1    | 2251 | 2318 | 8.13819491823      |
| NM_032096    | PCDHGB2  | 2    | 22   | 13.3503014541      |
| NM_032098    | PCDHGB4  | 302  | 351  | 11.1659193121      |
| NM_015640    | SERBP1   | 1172 | 1214 | 1.88615515573      |
| NM_001040716 | PC       | 1014 | 1047 | 8.29979004448      |
| NM_001040716 | PC       | 3017 | 3037 | 7.88073495258      |
| NM_006904    | PRKDC    | 1609 | 1681 | 7.0447773989       |
| NM_006904    | PRKDC    | 8227 | 8273 | 7.45964114787      |
| NM_006904    | PRKDC    | 4239 | 4274 | 7.7777253929       |
| NM_006904    | PRKDC    | 4890 | 4929 | 6.96063818952      |
| NM_006904    | PRKDC    | 1809 | 1853 | 5.3756756888       |
| NM_015024    | XP07     | 8    | 33   | 5.82989714466      |
| NM_001130046 | CCL20    | 563  | 603  | 7.4480155049       |
| NM_001130046 | CCL20    | 665  | 719  | 6.53215471429      |
| NM_001130046 | CCL20    | 297  | 416  | 9.41967998503      |
| NM_001130046 | CCL20    | 14   | 295  | 9.96511412156      |
| NM_001009999 | KDM1A    | 120  | 143  | 5.30853139327      |
| NM_000973    | RPL8     | 633  | 665  | 0.148285250168     |
| NM_000973    | RPL8     | 66   | 114  | 1.73324775089      |
| NM_000973    | RPL8     | 463  | 519  | 2.2324177285       |
| NM_000973    | RPL8     | 765  | 846  | 3.23242445955      |
| NM_138571    | HINT3    | 24   | 44   | 5.5799067669       |
| NM_138570    | SLC38A10 |      | 276  | 337 7.67050124502  |
| NM_138570    | SLC38A10 |      | 1547 | 1583 9.25546374574 |
| NM_138570    | SLC38A10 |      | 1234 | 1288 8.41148443936 |

|              |              |      |      |               |
|--------------|--------------|------|------|---------------|
| NM_138570    | SLC38A10     | 2425 | 2469 | 8.59037963581 |
| NM_138570    | SLC38A10     | 899  | 936  | 6.0855387443  |
| NM_138570    | SLC38A10     | 1763 | 1828 | 8.67451884519 |
| NM_001098    | AC02 561     | 630  |      | 6.36043010272 |
| NM_017728    | TMEM104 1554 | 1604 |      | 10.3481061686 |
| NM_017723    | C9orf167     | 2969 | 3021 | 11.006283139  |
| NM_017723    | C9orf167     | 899  | 961  | 10.8273879425 |
| NM_001013649 | C2orf68 38   | 57   |      | 4.79242264462 |
| NM_020246    | SLC12A9 1817 | 1873 |      | 10.0413664543 |
| NM_020246    | SLC12A9 546  | 605  |      | 11.2599150258 |
| NM_020246    | SLC12A9 2324 | 2358 |      | 10.4525601038 |
| NM_001013647 | L0C646851    | 6564 | 6609 | 11.8420688787 |
| NM_004355    | CD74 694     | 770  |      | 7.40019774211 |
| NM_004355    | CD74 1248    | 1297 |      | 6.46806162617 |
| NM_004355    | CD74 596     | 625  |      | 5.14613353128 |
| NM_001195532 | SPTAN1 6134  | 6160 |      | 4.31594203869 |
| NM_001195532 | SPTAN1 3481  | 3514 |      | 5.89706068956 |
| NM_001195532 | SPTAN1 6634  | 6701 |      | 6.11945311089 |
| NM_001195532 | SPTAN1 2874  | 2920 |      | 5.90107828973 |
| NM_001195532 | SPTAN1 5286  | 5356 |      | 6.77554067659 |
| NM_001195532 | SPTAN1 4651  | 4692 |      | 5.63402628372 |
| NM_001195532 | SPTAN1 7535  | 7596 |      | 7.12347071107 |
| NM_001195532 | SPTAN1 7349  | 7384 |      | 5.63787013358 |
| NM_001195532 | SPTAN1 4745  | 4795 |      | 6.23197657962 |
| NM_001195532 | SPTAN1 4399  | 4486 |      | 6.6380438839  |
| NM_001195532 | SPTAN1 1395  | 1433 |      | 3.31594203869 |
| NM_001195532 | SPTAN1 4489  | 4589 |      | 5.90107828973 |
| NM_001195532 | SPTAN1 2243  | 2294 |      | 4.31611555309 |
| NM_001195532 | SPTAN1 592   | 650  |      | 6.6380438839  |
| NM_001195532 | SPTAN1 2783  | 2818 |      | 4.81693908035 |
| NM_001195532 | SPTAN1 526   | 579  |      | 5.31209818884 |
| NM_001195532 | SPTAN1 2490  | 2554 |      | 5.31611578901 |
| NM_001195532 | SPTAN1 5933  | 6042 |      | 6.12347071107 |
| NM_001195532 | SPTAN1 3145  | 3228 |      | 5.6380438839  |
| NM_000271    | NPC1 2241    | 2293 |      | 7.96910867667 |
| NM_000271    | NPC1 2728    | 2780 |      | 5.04923028588 |
| NM_000271    | NPC1 3038    | 3078 |      | 5.96910867667 |
| NM_000271    | NPC1 2326    | 2392 |      | 7.37517597339 |
| NM_000271    | NPC1 778     | 822  |      | 6.63821015086 |
| NM_000271    | NPC1 1645    | 1687 |      | 7.86060257219 |
| NM_000271    | NPC1 3410    | 3459 |      | 7.29103677156 |
| NM_000271    | NPC1 3682    | 3778 |      | 7.86060280811 |
| NM_000271    | NPC1 2971    | 3014 |      | 6.55407117739 |
| NM_000271    | NPC1 2062    | 2131 |      | 7.85658520794 |
| NM_000273    | GPR143 572   | 616  |      | 13.8469781258 |
| NM_000273    | GPR143 1220  | 1248 |      | 12.3421372343 |
| NM_030791    | SGPP1 1062   | 1097 |      | 11.7361628666 |
| NM_030796    | VOPP1 300    | 385  |      | 10.2243256196 |
| NM_006600    | NUDC 805     | 874  |      | 5.18351518181 |
| NM_001128325 | SPON2 641    | 705  |      | 9.12841750608 |

|              |          |      |      |                    |
|--------------|----------|------|------|--------------------|
| NM_001128325 | SPON2    | 735  | 798  | 7.12841750609      |
| NM_001128325 | SPON2    | 409  | 433  | 7.62924079743      |
| NM_001128325 | SPON2    | 1048 | 1077 | 6.12841077504      |
| NM_001128325 | SPON2    | 831  | 870  | 8.70936240664      |
| NM_001128325 | SPON2    | 1085 | 1179 | 9.58784912473      |
| NM_001128325 | SPON2    | 1483 | 1515 | 8.36620639159      |
| NM_001128325 | SPON2    | 512  | 628  | 9.93577242815      |
| NM_172230    | SYVN1    | 668  | 739  | 11.1233592801      |
| NM_172230    | SYVN1    | 430  | 467  | 11.1231855298      |
| NM_172230    | SYVN1    | 976  | 1030 | 10.1233590442      |
| NM_172230    | SYVN1    | 513  | 566  | 10.9307141946      |
| NM_001098210 | CTNNB1   | 1587 | 1635 | 3.90956618093      |
| NM_001098210 | CTNNB1   | 2316 | 2392 | 3.90957291198      |
| NM_172236    | POFUT1   | 191  | 270  | 9.17494946969      |
| NM_001136558 | GPR107   | 1406 | 1435 | 7.51367138012      |
| NM_002720    | PPP4C    | 493  | 557  | 3.04169101596      |
| NM_002720    | PPP4C    | 67   | 129  | 4.71061897574      |
| NM_023935    | DDRGK1   | 19   | 66   | 5.43057607985      |
| NM_023935    | DDRGK1   | 759  | 794  | 5.01152098062      |
| NM_023935    | DDRGK1   | 339  | 401  | 6.23793100213      |
| NM_031203    | HNRNPM   | 375  | 441  | 3.68718367243      |
| NM_001042371 | PGP      | 18   | 45   | 11.792594839       |
| NM_001177519 | MICA     | 469  | 564  | 8.44477068927      |
| NM_015259    | ICOSLG   | 243  | 264  | 8.08812390397      |
| NM_019026    | TMC01    | 681  | 707  | 2.75817749231      |
| NM_019026    | TMC01    | 528  | 659  | 6.80274536198      |
| NM_019026    | TMC01    | 494  | 514  | 1.75817749231      |
| NM_019026    | TMC01    | 153  | 236  | 4.92827624407      |
| NM_019028    | ZDHHC13  | 1465 | 1493 | 8.36017970249      |
| NM_005188    | CBL      | 13   | 47   | 10.1176756416      |
| NM_152243    | CDC42EP1 |      | 841  | 910 8.00962735064  |
| NM_152243    | CDC42EP1 |      | 943  | 1016 9.2360306411  |
| NM_152243    | CDC42EP1 |      | 1534 | 1603 8.01364494326 |
| NM_053056    | CCND1    | 1071 | 1104 | 4.93888849356      |
| NM_001077442 | HNRNPC   | 235  | 282  | 1.77481325637      |
| NM_001077442 | HNRNPC   | 988  | 1096 | 0.77883085654      |
| NM_014014    | SNRNP200 |      | 1605 | 1648 5.28137878975 |
| NM_006986    | MAGED1   | 2024 | 2063 | 4.69750231566      |
| NM_018950    | HLA-F    | 1080 | 1126 | 10.5380074405      |
| NM_018950    | HLA-F    | 548  | 598  | 8.71690263698      |
| NM_018950    | HLA-F    | 862  | 919  | 8.80104184637      |
| NM_018950    | HLA-F    | 776  | 859  | 9.21607934564      |
| NM_016626    | MEX3C    | 891  | 921  | 7.91160667288      |
| NM_174936    | PCSK9    | 962  | 1019 | 9.46813309747      |
| NM_174936    | PCSK9    | 2310 | 2359 | 9.46796607821      |
| NM_174936    | PCSK9    | 2216 | 2287 | 10.2051051868      |
| NM_174936    | PCSK9    | 450  | 492  | 6.88317732026      |
| NM_174936    | PCSK9    | 733  | 771  | 10.5836103149      |
| NM_001198810 | SLC43A1  | 1234 | 1301 | 8.83925540177      |
| NM_001198810 | SLC43A1  | 1078 | 1125 | 5.66932366927      |

|              |         |      |      |                |
|--------------|---------|------|------|----------------|
| NM_001404    | EEF1G   | 921  | 966  | 2.45713482158  |
| NM_001404    | EEF1G   | 729  | 777  | 0.453123952464 |
| NM_001404    | EEF1G   | 326  | 368  | 3.04193030304  |
| NM_001404    | EEF1G   | 538  | 626  | 3.77906964752  |
| NM_001404    | EEF1G   | 1042 | 1153 | 3.91657317127  |
| NM_007126    | VCP     | 1145 | 1216 | 6.19277565212  |
| NM_001167931 | IL1RAP  | 920  | 979  | 7.82171041508  |
| NM_003801    | GPAA1   | 1232 | 1271 | 9.82243033921  |
| NM_003801    | GPAA1   | 1473 | 1518 | 9.82260385361  |
| NM_003801    | GPAA1   | 915  | 967  | 10.8185864894  |
| NM_003801    | GPAA1   | 353  | 452  | 10.5595696837  |
| NM_020713    | ZNF512B | 5821 | 5840 | 6.39777861497  |
| NM_005216    | DDOST   | 281  | 324  | 5.93184766294  |
| NM_005216    | DDOST   | 763  | 845  | 8.04732488791  |
| NM_005216    | DDOST   | 1268 | 1308 | 4.26274596039  |
| NM_005216    | DDOST   | 1446 | 1490 | 7.04732488769  |
| NM_005216    | DDOST   | 1211 | 1254 | 4.3428675696   |
| NM_005216    | DDOST   | 1559 | 1610 | 4.84770846111  |
| NM_005216    | DDOST   | 979  | 1046 | 5.93184767048  |
| NM_005216    | DDOST   | 729  | 763  | 5.66881302874  |
| NM_005216    | DDOST   | 1132 | 1171 | 3.26274596039  |
| NM_005216    | DDOST   | 444  | 531  | 5.93184767049  |
| NM_005216    | DDOST   | 571  | 693  | 8.47616818671  |
| NM_005216    | DDOST   | 1325 | 1390 | 4.93184766294  |
| NM_000130    | F5      | 1656 | 1685 | 3.32869146203  |
| NM_000130    | F5      | 1031 | 1065 | 4.2445589837   |
| NM_021009    | UBC     | 1266 | 1323 | 2.8064018961   |
| NM_021009    | UBC     | 1348 | 1406 | 3.80657564642  |
| NM_021009    | UBC     | 2288 | 2320 | 1.80255804625  |
| NM_021009    | UBC     | 1576 | 1636 | 3.80657564642  |
| NM_021009    | UBC     | 892  | 952  | 3.80657564642  |
| NM_021009    | UBC     | 458  | 493  | 2.80255804625  |
| NM_021009    | UBC     | 2471 | 2496 | 1.72243643704  |
| NM_021009    | UBC     | 1782 | 1864 | 2.80657564642  |
| NM_021009    | UBC     | 814  | 867  | 1.72243643704  |
| NM_021009    | UBC     | 2178 | 2235 | 1.8065756462   |
| NM_021009    | UBC     | 2040 | 2124 | 2.80657564642  |
| NM_001205228 | SORT1   | 1844 | 1865 | 4.89185536161  |
| NM_001205228 | SORT1   | 2425 | 2465 | 5.56095034067  |
| NM_001205228 | SORT1   | 861  | 906  | 6.97598783994  |
| NM_001205228 | SORT1   | 493  | 570  | 6.78334949305  |
| NM_001205228 | SORT1   | 1539 | 1589 | 5.56095706417  |
| NM_001205228 | SORT1   | 2016 | 2049 | 6.55693947155  |
| NM_001205228 | SORT1   | 2071 | 2136 | 6.29792265834  |
| NM_182983    | HPN     | 1181 | 1226 | 5.92177121752  |
| NM_182983    | HPN     | 977  | 1056 | 6.59087292763  |
| NM_006122    | MAN2A2  | 4221 | 4242 | 8.14032304794  |
| NM_139207    | NAP1L1  | 1436 | 1478 | 1.76730810202  |
| NM_006471    | MYL12A  | 745  | 781  | 2.99452984031  |
| NM_002569    | FURIN   | 2596 | 2629 | 8.79603494231  |

|              |          |      |      |                  |
|--------------|----------|------|------|------------------|
| NM_002569    | FURIN    | 2444 | 2499 | 9.79603494231    |
| NM_002569    | FURIN    | 371  | 400  | 8.20722859173    |
| NM_002569    | FURIN    | 900  | 928  | 9.71206948325    |
| NM_002569    | FURIN    | 559  | 624  | 7.21123946085    |
| NM_002569    | FURIN    | 866  | 893  | 8.71206948325    |
| NM_032256    | TMEM117  | 225  | 245  | 10.4449579017    |
| NM_001017995 | SH3PXD2B |      | 13   | 42 10.6110366503 |
| NM_013286    | RBM15B   | 144  | 163  | 7.64492888228    |
| NM_014060    | MCTS1    | 216  | 282  | 7.88291619954    |
| NM_014067    | MACROD1  | 304  | 331  | 5.34931918051    |
| NM_014399    | TSPAN13  | 766  | 804  | 10.0561653429    |
| NM_014399    | TSPAN13  | 686  | 766  | 10.1403045523    |
| NM_014399    | TSPAN13  | 1037 | 1079 | 10.4712028422    |
| NM_014399    | TSPAN13  | 507  | 532  | 10.0561653429    |
| NM_014390    | SND1     | 1176 | 1215 | 5.00279794561    |
| NM_014939    | TRAPPC8  | 118  | 154  | 8.26216154069    |
| NM_014931    | PPP6R1   | 2245 | 2300 | 5.79705504294    |
| NM_014931    | PPP6R1   | 2683 | 2739 | 6.12812708315    |
| NM_001873    | CPE      | 1050 | 1090 | 0.984041441149   |
| NM_001873    | CPE      | 831  | 887  | 3.06818041461    |
| NM_001002836 | ZNF787   | 1116 | 1150 | 8.37401492346    |
| NM_030802    | FAM117A  | 2301 | 2326 | 10.6365776308    |
| NM_022965    | FGFR3    | 1783 | 1864 | 7.13592147039    |
| NM_022965    | FGFR3    | 2452 | 2495 | 5.3987821259     |
| NM_022965    | FGFR3    | 1468 | 1507 | 5.72985416612    |
| NM_001037283 | EIF3B    | 67   | 110  | 4.02006659303    |
| NM_001037283 | EIF3B    | 518  | 594  | 4.8275952654     |
| NM_001037283 | EIF3B    | 2040 | 2090 | 2.93610113396    |
| NM_001037283 | EIF3B    | 893  | 931  | 3.60520260815    |
| NM_001037283 | EIF3B    | 2668 | 2731 | 4.01622274317    |
| NM_020524    | PBXIP1   | 2079 | 2117 | 7.6407347123     |
| NM_172210    | CSF1     | 1677 | 1734 | 9.96004556143    |
| NM_006667    | PGRMC1   | 512  | 596  | 9.79531848081    |
| NM_006667    | PGRMC1   | 605  | 647  | 7.72492915291    |
| NM_006667    | PGRMC1   | 89   | 156  | 7.90382434937    |
| NM_138821    | PAM      | 1119 | 1178 | 5.53800744053    |
| NM_002743    | PRKCSH   | 1971 | 2057 | 5.71598402482    |
| NM_002743    | PRKCSH   | 395  | 456  | 6.64886982897    |
| NM_002743    | PRKCSH   | 1695 | 1759 | 4.25655240619    |
| NM_002743    | PRKCSH   | 762  | 903  | 8.42647740763    |
| NM_002743    | PRKCSH   | 1374 | 1446 | 5.95699212433    |
| NM_002743    | PRKCSH   | 457  | 486  | 5.42647740741    |
| NM_002743    | PRKCSH   | 274  | 336  | 6.16344300179    |
| NM_002743    | PRKCSH   | 1515 | 1567 | 5.42647740763    |
| NM_002743    | PRKCSH   | 1450 | 1507 | 3.25655239864    |
| NM_002743    | PRKCSH   | 1069 | 1174 | 6.90040859596    |
| NM_002743    | PRKCSH   | 1570 | 1617 | 4.8415149069     |
| NM_002743    | PRKCSH   | 1258 | 1347 | 6.42647740763    |
| NM_002743    | PRKCSH   | 1773 | 1861 | 5.71598402482    |
| NM_002743    | PRKCSH   | 1629 | 1688 | 4.84150817585    |

|              |        |      |      |                |
|--------------|--------|------|------|----------------|
| NM_002743    | PRKCSH | 73   | 140  | 5.06390732802  |
| NM_002743    | PRKCSH | 537  | 724  | 8.25655240619  |
| NM_002743    | PRKCSH | 910  | 1041 | 6.78011436224  |
| NM_001085425 | ARSA   | 794  | 830  | 10.4249106088  |
| NM_031992    | EIF4H  | 312  | 364  | 3.53917076209  |
| NM_006080    | SEMA3A | 1171 | 1205 | 15.0847467974  |
| NM_006080    | SEMA3A | 1423 | 1460 | 13.7782218977  |
| NM_006080    | SEMA3A | 867  | 944  | 16.2773986064  |
| NM_006080    | SEMA3A | 780  | 854  | 15.8623611071  |
| NM_006080    | SEMA3A | 1901 | 1946 | 14.5993264653  |
| NM_006080    | SEMA3A | 1560 | 1699 | 17.5253261198  |
| NM_006080    | SEMA3A | 545  | 601  | 14.5993264653  |
| NM_006080    | SEMA3A | 1739 | 1783 | 13.7782218977  |
| NM_006082    | TUBA1B | 603  | 638  | 4.72314580062  |
| NM_006082    | TUBA1B | 659  | 706  | 5.72331931502  |
| NM_006082    | TUBA1B | 544  | 602  | 5.72331954339  |
| NM_006082    | TUBA1B | 902  | 974  | 7.04524764583  |
| NM_006082    | TUBA1B | 780  | 875  | 5.72331955094  |
| NM_014727    | MLL4   | 1    | 26   | 8.17361833349  |
| NM_001143760 | EIF5A  | 131  | 189  | 2.61753312027  |
| NM_001143760 | EIF5A  | 482  | 561  | 3.03257084791  |
| NM_001007073 | RPL32  | 88   | 118  | 5.08372397076  |
| NM_001007073 | RPL32  | 190  | 252  | 0.831778857367 |
| NM_001037738 | NPM1   | 717  | 819  | 0.935050772116 |
| NM_001037738 | NPM1   | 656  | 687  | -1.23504797964 |
| NM_001037738 | NPM1   | 242  | 312  | -0.23488096038 |
| NM_001206954 | AGER   | 1100 | 1118 | 8.32835956188  |
| NM_001097613 | GPR89A | 1377 | 1413 | 7.44496267793  |
| NM_020860    | STIM2  | 1416 | 1456 | 8.73146052733  |
