# Supplementary material for: Oncoprotein AEG-1 is an endoplasmic reticulum RNA-binding protein whose interactome is enriched in organelle resident protein-encoding mRNAs
Source: PubMed Central journal article supplement — RNA. 2018 May;24(5):688–703. doi: 10.1261/rna.063313.117 (PMC5900566; doi:10.1261/rna.063313.117), 2018-05
Supplement: supp_063313.117_Supplemental_Table_2_Set_2.pdf [file supp_063313.117_Supplemental_Table_2_Set_2.pdf]

| #Refseq Gene | Cluster start | Cluster end | Cluster score |
|--------------|---------------|-------------|---------------|
| NM_001080825 | TMEM120B      | 6800 6842   | 7.73598845977 |
| NM_001469    | XRCC6 1714    | 1764        | 1.35919673053 |
| NM_004104    | FASN 7168     | 7216        | 6.35855227554 |
| NM_004104    | FASN 4031     | 4089        | 6.58094493279 |
| NM_004104    | FASN 3576     | 3618        | 5.35453491128 |
| NM_004104    | FASN 3157     | 3210        | 6.01137889624 |
| NM_004104    | FASN 6546     | 6597        | 6.58094492524 |
| NM_004104    | FASN 2747     | 2786        | 5.76957241056 |
| NM_004104    | FASN 6159     | 6209        | 6.77358327968 |
| NM_004104    | FASN 4999     | 5043        | 6.49680572341 |
| NM_004104    | FASN 3785     | 3860        | 6.09551786971 |
| NM_004104    | FASN 4552     | 4654        | 4.77358327968 |
| NM_004104    | FASN 4420     | 4488        | 4.77358327968 |
| NM_004104    | FASN 5429     | 5484        | 4.68945080135 |
| NM_004104    | FASN 4917     | 4995        | 6.58093820174 |
| NM_007107    | SSR3 504      | 604         | 6.47528546246 |
| NM_007107    | SSR3 607      | 673         | 4.73831963238 |
| NM_007107    | SSR3 366      | 494         | 7.32328236902 |
| NM_007104    | RPL10A 513    | 560         | 1.05175158419 |
| NM_007104    | RPL10A 114    | 170         | 1.58628390084 |
| NM_000483    | APOC2 465     | 500         | 4.17742851716 |
| NM_001682    | ATP2B1 2023   | 2133        | 9.2754600998  |
| NM_001682    | ATP2B1 1728   | 1750        | 7.51324898531 |
| NM_001682    | ATP2B1 966    | 1019        | 8.19132089042 |
| NM_001683    | ATP2B2 1218   | 1268        | 10.1472446872 |
| NM_001011722 | ARHGEF10L     | 2522 2563   | 7.54905593197 |
| NM_020199    | C5orf15 583   | 633         | 8.68375559916 |
| NM_020198    | CCDC47 746    | 792         | 6.73159028378 |
| NM_020198    | CCDC47 695    | 728         | 5.08756034369 |
| NM_020198    | CCDC47 947    | 991         | 5.99462468961 |
| NM_020198    | CCDC47 1147   | 1188        | 3.08756034369 |
| NM_020198    | CCDC47 1557   | 1604        | 4.89508901584 |
| NM_020198    | CCDC47 1000   | 1038        | 3.08772736295 |
| NM_020198    | CCDC47 1191   | 1295        | 6.67269659473 |
| NM_020198    | CCDC47 849    | 945         | 4.40966218889 |
| NM_020198    | CCDC47 401    | 503         | 5.40966218889 |
| NM_020198    | CCDC47 514    | 647         | 5.89508901606 |
| NM_004818    | DDX23 421     | 502         | 5.72195463831 |
| NM_020190    | OLFML3 1080   | 1129        | 11.6903025477 |
| NM_020190    | OLFML3 505    | 538         | 11.105340047  |
| NM_020190    | OLFML3 783    | 822         | 10.6061633386 |
| NM_020190    | OLFML3 351    | 423         | 11.4272679062 |
| NM_003688    | CASK 2566     | 2587        | 8.08118779235 |
| NM_003681    | PDXK 4747     | 4765        | 5.01646291884 |
| NM_003681    | PDXK 4610     | 4643        | 6.41851262294 |
| NM_003685    | KHSRP 878     | 947         | 4.81837406442 |
| NM_002889    | RARRES2 420   | 470         | 8.5236058168  |
| NM_002889    | RARRES2 312   | 377         | 6.35368080781 |
| NM_002889    | RARRES2 525   | 584         | 6.93863658502 |

|              |          |      |      |                    |
|--------------|----------|------|------|--------------------|
| NM_002889    | RARRES2  | 49   | 161  | 9.5236058168       |
| NM_001184835 | GPR64    | 75   | 99   | 12.6217050408      |
| NM_032508    | TMEM185A |      | 130  | 179 7.13952111752  |
| NM_002087    | GRN      | 603  | 683  | 9.98419054297      |
| NM_002087    | GRN      | 1641 | 1724 | 9.64715555569      |
| NM_002087    | GRN      | 336  | 394  | 6.90005133358      |
| NM_002087    | GRN      | 1117 | 1188 | 8.56915304369      |
| NM_002087    | GRN      | 1054 | 1097 | 7.72115613713      |
| NM_002087    | GRN      | 904  | 1054 | 10.5691530437      |
| NM_002087    | GRN      | 708  | 754  | 6.39905429193      |
| NM_002087    | GRN      | 1318 | 1438 | 10.4436221616      |
| NM_002087    | GRN      | 2058 | 2133 | 8.39922804202      |
| NM_002087    | GRN      | 1442 | 1592 | 10.3061186379      |
| NM_002087    | GRN      | 1968 | 2051 | 8.56915304369      |
| NM_002087    | GRN      | 189  | 287  | 8.72115613713      |
| NM_002087    | GRN      | 799  | 892  | 7.72115613713      |
| NM_002087    | GRN      | 1734 | 1905 | 10.3992280422      |
| NM_002081    | GPC1     | 1634 | 1688 | 12.489480467       |
| NM_002081    | GPC1     | 1120 | 1179 | 12.2968351532      |
| NM_015355    | SUZ12    | 290  | 326  | 4.2282750253       |
| NM_002555    | SLC22A18 |      | 1324 | 1366 11.6787793653 |
| NM_001004060 | NOM02    | 714  | 754  | 5.7907883086       |
| NM_001004060 | NOM02    | 3398 | 3438 | 5.37575080932      |
| NM_001004060 | NOM02    | 1465 | 1536 | 5.96071331005      |
| NM_001004060 | NOM02    | 785  | 823  | 4.79078807268      |
| NM_001004060 | NOM02    | 2128 | 2186 | 5.37575080932      |
| NM_001004060 | NOM02    | 156  | 222  | 5.11271640349      |
| NM_001004060 | NOM02    | 3504 | 3549 | 4.79078830105      |
| NM_001004060 | NOM02    | 2012 | 2054 | 5.3757508091       |
| NM_001004060 | NOM02    | 3256 | 3297 | 5.96071331005      |
| NM_001004060 | NOM02    | 438  | 469  | 3.79078830105      |
| NM_001004060 | NOM02    | 1375 | 1435 | 5.11271640349      |
| NM_001004060 | NOM02    | 2307 | 2395 | 5.37575080932      |
| NM_001004060 | NOM02    | 2636 | 2691 | 3.79078807268      |
| NM_001004060 | NOM02    | 2187 | 2230 | 2.70664909922      |
| NM_001004060 | NOM02    | 2497 | 2555 | 4.37574407827      |
| NM_001004060 | NOM02    | 2760 | 2882 | 4.7907883086       |
| NM_001004060 | NOM02    | 3555 | 3590 | 2.79061455828      |
| NM_001004060 | NOM02    | 965  | 1025 | 2.79078157755      |
| NM_001004060 | NOM02    | 231  | 321  | 6.37575080932      |
| NM_001004060 | NOM02    | 2996 | 3123 | 7.25021992724      |
| NM_001004060 | NOM02    | 882  | 954  | 3.78677070843      |
| NM_001004060 | NOM02    | 321  | 420  | 5.96071331005      |
| NM_001004060 | NOM02    | 1547 | 1636 | 6.11271640349      |
| NM_001004060 | NOM02    | 2890 | 2951 | 3.78677070843      |
| NM_001004060 | NOM02    | 1740 | 1877 | 7.03871582205      |
| NM_001004060 | NOM02    | 1885 | 1965 | 5.59814323066      |
| NM_001004067 | NOM03    | 3567 | 3617 | 2.81919915033      |
| NM_001004067 | NOM03    | 3781 | 3822 | 2.81518155038      |
| NM_001004067 | NOM03    | 1028 | 1088 | 3.8191924195       |

|              |         |      |      |               |
|--------------|---------|------|------|---------------|
| NM_001004067 | NOM03   | 4090 | 4143 | 5.40416165106 |
| NM_001004067 | NOM03   | 3618 | 3653 | 4.81919891464 |
| NM_001004067 | NOM03   | 422  | 483  | 6.5196388687  |
| NM_001004067 | NOM03   | 1446 | 1498 | 4.81919915056 |
| NM_001004067 | NOM03   | 501  | 532  | 5.14112724522 |
| NM_001004067 | NOM03   | 1948 | 2028 | 5.989124152   |
| NM_001004067 | NOM03   | 2699 | 2756 | 4.81919915033 |
| NM_001004067 | NOM03   | 1735 | 1803 | 3.81919915055 |
| NM_001004067 | NOM03   | 777  | 817  | 3.81919915056 |
| NM_001004067 | NOM03   | 3447 | 3501 | 6.5196388687  |
| NM_001004067 | NOM03   | 2191 | 2249 | 5.81919915056 |
| NM_001004067 | NOM03   | 2560 | 2618 | 4.40415492022 |
| NM_001004067 | NOM03   | 2080 | 2117 | 5.14112700953 |
| NM_001004067 | NOM03   | 3319 | 3360 | 4.81919915056 |
| NM_001004067 | NOM03   | 2250 | 2293 | 3.73505994117 |
| NM_001004067 | NOM03   | 3939 | 4000 | 4.81919915055 |
| NM_001004067 | NOM03   | 945  | 1017 | 4.81919891464 |
| NM_001004067 | NOM03   | 2370 | 2458 | 5.14112724544 |
| NM_001004067 | NOM03   | 2953 | 3014 | 4.4001440511  |
| NM_001004067 | NOM03   | 2823 | 2945 | 5.989124152   |
| NM_001004067 | NOM03   | 219  | 384  | 7.14112724544 |
| NM_001004067 | NOM03   | 3059 | 3186 | 7.14112724544 |
| NM_001004067 | NOM03   | 848  | 886  | 2.81518155038 |
| NM_001004067 | NOM03   | 1803 | 1940 | 7.067126664   |
| NM_001004067 | NOM03   | 1528 | 1699 | 6.27863076919 |
| NM_005689    | ABCB6   | 2006 | 2039 | 6.36024173495 |
| NM_005689    | ABCB6   | 2084 | 2170 | 6.44036334416 |
| NM_018050    | MANSC1  | 1497 | 1586 | 9.16632000884 |
| NM_001130006 | GSPT1   | 248  | 297  | 4.51091392603 |
| NM_001130005 | ACTN1   | 344  | 388  | 5.5965578403  |
| NM_001142355 | NIF3L1  | 596  | 614  | 5.97323286678 |
| NM_079834    | SCAMP4  | 575  | 604  | 8.05322863404 |
| NM_079834    | SCAMP4  | 635  | 698  | 8.05322863404 |
| NM_014914    | AGAP1   | 541  | 571  | 6.73418574377 |
| NM_014916    | LMTK2   | 185  | 268  | 10.8764289681 |
| NM_005022    | PFN1    | 713  | 772  | 5.17064962553 |
| NM_005022    | PFN1    | 866  | 949  | 5.39304204709 |
| NM_001005335 | HNRNPL  | 542  | 576  | 3.56328651419 |
| NM_001005335 | HNRNPL  | 604  | 642  | 4.14440516506 |
| NM_001005335 | HNRNPL  | 327  | 359  | 2.47932105512 |
| NM_001002811 | PDE4DIP | 2017 | 2053 | 7.97874873125 |
| NM_001853    | COL9A3  | 192  | 302  | 9.47546597446 |
| NM_001853    | COL9A3  | 1889 | 1929 | 8.20841396846 |
| NM_001853    | COL9A3  | 999  | 1037 | 7.80636426436 |
| NM_001853    | COL9A3  | 1708 | 1754 | 8.47144837429 |
| NM_001853    | COL9A3  | 1812 | 1860 | 8.39132676508 |
| NM_001853    | COL9A3  | 414  | 506  | 7.89050346619 |
| NM_001853    | COL9A3  | 916  | 970  | 8.89050346619 |
| NM_001852    | COL9A2  | 2302 | 2337 | 8.43126800651 |
| NM_001204510 | EIF4A1  | 198  | 243  | 3.87007452336 |

|              |           |      |      |                    |
|--------------|-----------|------|------|--------------------|
| NM_001204510 | EIF4A1    | 1191 | 1232 | 2.6436645094       |
| NM_001204510 | EIF4A1    | 700  | 732  | 2.56354290019      |
| NM_004649    | C21orf33  |      | 886  | 906 4.5613959977   |
| NM_032039    | ITFG3     | 710  | 763  | 9.90428754881      |
| NM_001144    | AMFR      | 1219 | 1274 | 8.44174319428      |
| NM_004315    | ASAH1     | 1149 | 1193 | 5.09194240141      |
| NM_004315    | ASAH1     | 599  | 634  | 4.28475449861      |
| NM_004315    | ASAH1     | 830  | 925  | 6.19165182528      |
| NM_004315    | ASAH1     | 1202 | 1272 | 3.86972349447      |
| NM_001686    | ATP5B     | 1164 | 1235 | 5.42301918941      |
| NM_001686    | ATP5B     | 1284 | 1315 | 2.63844026188      |
| NM_025029    | MZT2B     | 515  | 567  | 3.98054334459      |
| NM_016454    | TMEM85    | 576  | 626  | 7.97642495715      |
| NM_016454    | TMEM85    | 632  | 669  | 5.08894842588      |
| NM_001689    | ATP5G3    | 269  | 314  | 2.01552061978      |
| NM_001689    | ATP5G3    | 2306 | 2338 | 3.01551389628      |
| NM_138462    | ZMYND19   | 0    | 27   | 5.27793915697      |
| NM_001024649 | CANX      | 2698 | 2751 | 3.00266086798      |
| NM_001024649 | CANX      | 580  | 626  | 4.0028346183       |
| NM_001024649 | CANX      | 421  | 567  | 6.54715513452      |
| NM_001024649 | CANX      | 1915 | 1958 | 4.00283461075      |
| NM_001024649 | CANX      | 1067 | 1252 | 7.50533495883      |
| NM_001024649 | CANX      | 1832 | 1873 | 3.73578261229      |
| NM_001024649 | CANX      | 1334 | 1377 | 3.00282788725      |
| NM_001024649 | CANX      | 867  | 995  | 6.62732548321      |
| NM_001024649 | CANX      | 1378 | 1637 | 7.70327433644      |
| NM_001024649 | CANX      | 685  | 746  | 4.0028346183       |
| NM_001024649 | CANX      | 70   | 117  | 3.00283461808      |
| NM_001024649 | CANX      | 118  | 293  | 6.58779711902      |
| NM_001024649 | CANX      | 1657 | 1815 | 6.11831183572      |
| NM_001024649 | CANX      | 304  | 420  | 4.73980021247      |
| NM_006640    | SEPT9     | 4018 | 4085 | 5.23493395921      |
| NM_006648    | WNK2      | 2453 | 2493 | 10.4903624337      |
| NM_001184781 | DGCR2     | 3236 | 3271 | 7.57963861107      |
| NM_001184781 | DGCR2     | 396  | 434  | 9.46711514234      |
| NM_001184781 | DGCR2     | 1119 | 1172 | 8.244722721        |
| NM_001184781 | DGCR2     | 3530 | 3583 | 8.66360407013      |
| NM_001184781 | DGCR2     | 474  | 516  | 9.66377782045      |
| NM_001184781 | DGCR2     | 3461 | 3513 | 7.57963861107      |
| NM_001184781 | DGCR2     | 1705 | 1797 | 8.244722721        |
| NM_031426    | AIF1L     | 126  | 148  | 7.5809243567       |
| NM_177983    | PPM1G     | 1154 | 1191 | 4.11380103669      |
| NM_001080542 | FBF1      | 3187 | 3209 | 14.0248167466      |
| NM_001011551 | C1GALT1C1 |      | 485  | 528 7.25730110958  |
| NM_001011551 | C1GALT1C1 |      | 1033 | 1116 6.9353730147  |
| NM_001011551 | C1GALT1C1 |      | 1209 | 1261 7.52034224647 |
| NM_001011551 | C1GALT1C1 |      | 757  | 809 5.93537974574  |
| NM_014742    | TM9SF4    | 1454 | 1518 | 7.17428766881      |
| NM_014742    | TM9SF4    | 1579 | 1618 | 6.91124653947      |
| NM_014742    | TM9SF4    | 1277 | 1342 | 6.58932517564      |

|              |          |       |       |                   |
|--------------|----------|-------|-------|-------------------|
| NM_014742    | TM9SF4   | 836   | 901   | 8.3966800977      |
| NM_014742    | TM9SF4   | 1759  | 1813  | 7.91125303461     |
| NM_014742    | TM9SF4   | 448   | 495   | 7.17027007619     |
| NM_014742    | TM9SF4   | 1947  | 1985  | 6.82711406114     |
| NM_014742    | TM9SF4   | 688   | 755   | 7.17428766881     |
| NM_014742    | TM9SF4   | 1988  | 2042  | 7.58932493972     |
| NM_014742    | TM9SF4   | 1084  | 1195  | 9.1128871317      |
| NM_014742    | TM9SF4   | 2142  | 2178  | 6.17027007619     |
| NM_014742    | TM9SF4   | 331   | 409   | 7.17428767636     |
| NM_005234    | NR2F6    | 114   | 150   | 9.21762150574     |
| NM_032772    | ZNF503   | 1061  | 1091  | 9.68259306241     |
| NM_001077489 | GNAS     | 1410  | 1463  | 0.0945277162177   |
| NM_001077489 | GNAS     | 689   | 741   | 2.42047341106     |
| NM_001077484 | SLC38A1  | 1383  | 1414  | 9.54683644448     |
| NM_001033723 | ZNF704   | 11252 | 11271 | 10.2004551258     |
| NM_015168    | ZC3H4    | 653   | 724   | 8.68299819888     |
| NM_015161    | ARL6IP1  | 529   | 627   | 7.39112937927     |
| NM_015161    | ARL6IP1  | 714   | 754   | 6.21718677765     |
| NM_015161    | ARL6IP1  | 212   | 319   | 8.02855929988     |
| NM_015161    | ARL6IP1  | 8     | 78    | 7.54313247271     |
| NM_015161    | ARL6IP1  | 96    | 170   | 7.68063599646     |
| NM_015161    | ARL6IP1  | 403   | 529   | 8.02855929988     |
| NM_001333    | CTSL2    | 650   | 718   | 8.48718318146     |
| NM_001333    | CTSL2    | 559   | 592   | 7.08111587719     |
| NM_004127    | GPS1     | 1061  | 1103  | 4.46614656093     |
| NM_001448    | GPC4     | 1649  | 1678  | 13.236668479      |
| NM_001448    | GPC4     | 1030  | 1075  | 11.9948619934     |
| NM_001164262 | PPIAL4F  | 534   | 561   | 6.76356690503     |
| NM_001164261 | PPIAL4D  | 532   | 561   | 8.31200352972     |
| NM_000313    | PROS1    | 1370  | 1411  | 5.56028658407     |
| NM_000312    | PROC     | 544   | 588   | 3.62712261077     |
| NM_000312    | PROC     | 868   | 934   | 5.79688059295     |
| NM_000310    | PPT1     | 435   | 494   | 7.32160131404     |
| NM_000310    | PPT1     | 634   | 658   | 4.14765871265     |
| NM_000310    | PPT1     | 231   | 320   | 6.1516760769      |
| NM_000310    | PPT1     | 877   | 912   | 6.1515025625      |
| NM_138788    | TMEM45B  | 728   | 810   | 7.34488666288     |
| NM_138788    | TMEM45B  | 404   | 433   | 4.8013158424      |
| NM_138788    | TMEM45B  | 549   | 614   | 5.47041755229     |
| NM_021228    | SCAF1    | 308   | 329   | 9.61741101911     |
| NM_138783    | ZNF653   | 130   | 153   | 11.8359193115     |
| NM_173514    | SLC38A9  | 1841  | 1876  | 8.80425845735     |
| NM_173514    | SLC38A9  | 1350  | 1397  | 10.3892209581     |
| NM_173517    | VKORC1L1 |       | 69    | 100 4.63475083938 |
| NM_001174136 | TDGF1    | 238   | 258   | 9.22591628447     |
| NM_139322    | ATRN     | 77    | 147   | 6.893288276       |
| NM_139322    | ATRN     | 155   | 197   | 6.80915579767     |
| NM_139322    | ATRN     | 2715  | 2786  | 8.21522310172     |
| NM_139322    | ATRN     | 2156  | 2214  | 5.80915579767     |
| NM_139322    | ATRN     | 727   | 762   | 7.13108389256     |

|              |        |      |      |                |
|--------------|--------|------|------|----------------|
| NM_139322    | ATRN   | 2066 | 2105 | 5.80915579767  |
| NM_139322    | ATRN   | 1766 | 1809 | 4.80915579767  |
| NM_139322    | ATRN   | 483  | 609  | 8.35272662569  |
| NM_004872    | TMEM59 | 985  | 1031 | 6.25310033169  |
| NM_004872    | TMEM59 | 520  | 558  | 5.51211737327  |
| NM_004872    | TMEM59 | 657  | 689  | 5.51211737327  |
| NM_004872    | TMEM59 | 691  | 773  | 5.93099872241  |
| NM_004870    | MPDU1  | 646  | 688  | 9.02311068443  |
| NM_004870    | MPDU1  | 1539 | 1588 | 8.02310395359  |
| NM_004870    | MPDU1  | 566  | 606  | 8.01909308447  |
| NM_004870    | MPDU1  | 831  | 911  | 8.0231106771   |
| NM_001199671 | CALU   | 1628 | 1684 | 2.50805602504  |
| NM_001199671 | CALU   | 1398 | 1495 | 3.40131457145  |
| NM_001199671 | CALU   | 1825 | 1861 | 1.69685725313  |
| NM_001199671 | CALU   | 1200 | 1318 | 4.74526897266  |
| NM_001199671 | CALU   | 1686 | 1763 | 2.02280294819  |
| NM_000175    | GPI    | 290  | 354  | 5.93121282543  |
| NM_000175    | GPI    | 926  | 1007 | 5.41663966015  |
| NM_001170937 | FUS    | 744  | 781  | 3.77133205799  |
| NM_001170937 | FUS    | 983  | 1012 | 4.10223034789  |
| NM_001170937 | FUS    | 712  | 735  | 4.18619580696  |
| NM_006435    | IFITM2 | 221  | 289  | 8.69283262919  |
| NM_006435    | IFITM2 | 324  | 369  | 9.27779512991  |
| NM_006432    | NPC2   | 565  | 616  | 6.65636109505  |
| NM_006432    | NPC2   | 636  | 698  | 10.7405003044  |
| NM_006432    | NPC2   | 412  | 469  | 6.65636109505  |
| NM_015375    | DSTYK  | 52   | 87   | 10.7895697959  |
| NM_018211    | RAVER2 | 4034 | 4055 | 8.58172001021  |
| NM_002203    | ITGA2  | 2501 | 2542 | 10.0341910452  |
| NM_002203    | ITGA2  | 3263 | 3310 | 8.35611240906  |
| NM_002203    | ITGA2  | 1611 | 1643 | 9.20411603912  |
| NM_002203    | ITGA2  | 1312 | 1358 | 7.03017344505  |
| NM_002203    | ITGA2  | 2376 | 2452 | 9.49362266386  |
| NM_001166114 | PNPLA6 | 756  | 813  | 10.4936239917  |
| NM_001166114 | PNPLA6 | 2599 | 2661 | 9.49345024164  |
| NM_001166114 | PNPLA6 | 1674 | 1725 | 9.73141287746  |
| NM_001166114 | PNPLA6 | 3526 | 3568 | 9.40948478257  |
| NM_032565    | EBPL   | 354  | 400  | 7.39776956081  |
| NM_033161    | SURF4  | 795  | 837  | 7.42074801777  |
| NM_033161    | SURF4  | 487  | 516  | 4.60937549554  |
| NM_033161    | SURF4  | 2814 | 2834 | 5.19433799626  |
| NM_033161    | SURF4  | 518  | 571  | 4.61339309549  |
| NM_033161    | SURF4  | 741  | 781  | 5.19433799626  |
| NM_033161    | SURF4  | 668  | 702  | 4.60937549554  |
| NM_033161    | SURF4  | 889  | 971  | 6.42074801777  |
| NM_033161    | SURF4  | 348  | 434  | 6.61339309571  |
| NM_002951    | RPN2   | 1826 | 1871 | 4.65431097598  |
| NM_002951    | RPN2   | 442  | 498  | 4.54739577206  |
| NM_002951    | RPN2   | 1782 | 1808 | 3.43174480432  |
| NM_002951    | RPN2   | 1183 | 1228 | 0.762816844535 |

|              |         |      |      |               |
|--------------|---------|------|------|---------------|
| NM_002951    | RPN2    | 142  | 216  | 3.43191831872 |
| NM_002951    | RPN2    | 1935 | 2022 | 5.80115236431 |
| NM_002951    | RPN2    | 1103 | 1175 | 4.16888414881 |
| NM_002951    | RPN2    | 742  | 786  | 3.65431097597 |
| NM_002951    | RPN2    | 1378 | 1424 | 4.43191855464 |
| NM_002951    | RPN2    | 950  | 994  | 2.84695605392 |
| NM_002951    | RPN2    | 2037 | 2153 | 4.65431097598 |
| NM_002951    | RPN2    | 821  | 945  | 5.49081224369 |
| NM_002951    | RPN2    | 302  | 376  | 1.846955818   |
| NM_002951    | RPN2    | 1009 | 1098 | 4.43191855464 |
| NM_002951    | RPN2    | 1432 | 1475 | 3.65413722566 |
| NM_002951    | RPN2    | 586  | 698  | 3.43191855464 |
| NM_002951    | RPN2    | 1515 | 1742 | 6.33880915025 |
| NM_014681    | DHX34   | 3508 | 3564 | 9.57822226703 |
| NM_133631    | ROB01   | 5534 | 5562 | 6.50644321864 |
| NM_133631    | ROB01   | 1359 | 1440 | 6.92532456777 |
| NM_133631    | ROB01   | 4890 | 4930 | 6.64871403077 |
| NM_133631    | ROB01   | 1593 | 1665 | 6.51046081881 |
| NM_133631    | ROB01   | 3048 | 3084 | 5.51046081126 |
| NM_133631    | ROB01   | 3247 | 3274 | 5.42632160943 |
| NM_133631    | ROB01   | 2261 | 2320 | 4.92549831054 |
| NM_014976    | PDCD11  | 4566 | 4603 | 6.92777334533 |
| NM_005005    | NDUFB9  | 206  | 262  | 3.62962937546 |
| NM_213611    | SLC25A3 | 541  | 620  | 4.11328963859 |
| NM_080476    | PIGU    | 1275 | 1343 | 9.73715149016 |
| NM_080476    | PIGU    | 1185 | 1220 | 8.08490104326 |
| NM_001034852 | SMOC1   | 719  | 751  | 5.94084430649 |
| NM_001034852 | SMOC1   | 1253 | 1289 | 4.35588180577 |
| NM_001034852 | SMOC1   | 1473 | 1518 | 6.24720218689 |
| NM_001784    | CD97    | 1007 | 1047 | 11.5176783272 |
| NM_001784    | CD97    | 1238 | 1264 | 9.51767832725 |
| NM_001784    | CD97    | 2214 | 2251 | 9.43755671804 |
| NM_001784    | CD97    | 1705 | 1773 | 12.3290508495 |
| NM_182646    | CPEB2   | 1049 | 1080 | 10.8391769753 |
| NM_182646    | CPEB2   | 1435 | 1461 | 9.83515937508 |
| NM_021977    | SLC22A3 | 19   | 43   | 8.32977788342 |
| NM_001024912 | CEACAM1 | 1555 | 1582 | 3.41571810333 |
| NM_198310    | TTC8    | 1848 | 1869 | 9.03505099556 |
| NM_000784    | CYP27A1 | 956  | 1044 | 7.28520291356 |
| NM_000784    | CYP27A1 | 1146 | 1208 | 6.47784775559 |
| NM_000784    | CYP27A1 | 780  | 836  | 4.97867128284 |
| NM_016306    | DNAJB11 | 417  | 471  | 3.47567647651 |
| NM_016306    | DNAJB11 | 1019 | 1065 | 2.89054022548 |
| NM_016306    | DNAJB11 | 340  | 415  | 4.69806889785 |
| NM_016306    | DNAJB11 | 1255 | 1317 | 3.89071397558 |
| NM_016306    | DNAJB11 | 621  | 690  | 3.47566974547 |
| NM_016306    | DNAJB11 | 730  | 774  | 3.47566974547 |
| NM_016306    | DNAJB11 | 1132 | 1187 | 4.8907139758  |
| NM_016306    | DNAJB11 | 820  | 946  | 5.06063897724 |
| NM_016306    | DNAJB11 | 106  | 303  | 5.35014559444 |

|              |          |      |      |                   |
|--------------|----------|------|------|-------------------|
| NM_015966    | ERGIC3   | 1219 | 1276 | 4.63935724754     |
| NM_015966    | ERGIC3   | 739  | 783  | 4.84580812501     |
| NM_015966    | ERGIC3   | 454  | 502  | 3.9389175294      |
| NM_015966    | ERGIC3   | 511  | 580  | 3.26084562428     |
| NM_015966    | ERGIC3   | 921  | 995  | 3.93891752918     |
| NM_015966    | ERGIC3   | 1187 | 1213 | 0.854778320014    |
| NM_015966    | ERGIC3   | 326  | 428  | 3.74627245146     |
| NM_015965    | NDUFA13  | 319  | 349  | 2.64016912084     |
| NM_004566    | PFKFB3   | 259  | 292  | 7.92841442179     |
| NM_172251    | MRPL54   | 287  | 306  | 6.5031875474      |
| NM_001032281 | TFPI     | 730  | 775  | 2.34672937947     |
| NM_001032281 | TFPI     | 843  | 918  | 2.56912180835     |
| NM_001032281 | TFPI     | 527  | 593  | 3.93169188774     |
| NM_001032281 | TFPI     | 777  | 816  | 2.08369498118     |
| NM_031157    | HNRNPA1  | 160  | 249  | 2.18279863716     |
| NM_014762    | DHCR24   | 1400 | 1512 | 6.9578006418      |
| NM_014762    | DHCR24   | 1344 | 1381 | 5.82029711805     |
| NM_014762    | DHCR24   | 1833 | 1878 | 4.82029688213     |
| NM_014762    | DHCR24   | 891  | 960  | 6.40525961877     |
| NM_014762    | DHCR24   | 1905 | 1941 | 4.49836902316     |
| NM_014762    | DHCR24   | 352  | 383  | 4.81627951787     |
| NM_014762    | DHCR24   | 3029 | 3087 | 5.30572394522     |
| NM_014762    | DHCR24   | 1105 | 1185 | 5.08333151633     |
| NM_014762    | DHCR24   | 1526 | 1590 | 6.1988087413      |
| NM_014762    | DHCR24   | 1251 | 1296 | 5.08333152387     |
| NM_014762    | DHCR24   | 1640 | 1701 | 5.82029711782     |
| NM_014762    | DHCR24   | 3104 | 3154 | 4.81627951787     |
| NM_014762    | DHCR24   | 1041 | 1095 | 4.82029711782     |
| NM_014762    | DHCR24   | 971  | 1010 | 3.9991923145      |
| NM_014762    | DHCR24   | 655  | 818  | 7.58583186441     |
| NM_014762    | DHCR24   | 1196 | 1241 | 2.41422981377     |
| NM_014762    | DHCR24   | 410  | 456  | 4.82029688213     |
| NM_014762    | DHCR24   | 573  | 648  | 6.1988087413      |
| NM_014762    | DHCR24   | 461  | 549  | 6.9578006418      |
| NM_014762    | DHCR24   | 137  | 267  | 6.89068644594     |
| NM_014765    | TOMM20   | 619  | 662  | 1.77801391205     |
| NM_018685    | ANLN     | 1849 | 1911 | 8.02498686737     |
| NM_018687    | C19orf80 |      | 279  | 339 7.55520059312 |
| NM_018687    | C19orf80 |      | 593  | 654 6.68073146766 |
| NM_018687    | C19orf80 |      | 137  | 223 6.89910629637 |
| NM_032717    | AGPAT9   | 563  | 607  | 10.6078542782     |
| NM_032717    | AGPAT9   | 1486 | 1527 | 10.3409760225     |
| NM_015140    | TTLL12   | 3    | 36   | 8.87842285508     |
| NM_015149    | RGL1     | 597  | 618  | 9.33601133278     |
| NM_170665    | ATP2A2   | 991  | 1046 | 6.19987427154     |
| NM_170665    | ATP2A2   | 1779 | 1845 | 7.47998219096     |
| NM_170665    | ATP2A2   | 2316 | 2386 | 6.56244435115     |
| NM_170665    | ATP2A2   | 2535 | 2605 | 7.47998219096     |
| NM_170665    | ATP2A2   | 1641 | 1697 | 6.71444744437     |
| NM_170665    | ATP2A2   | 2472 | 2507 | 6.85195096834     |



|              |           |      |      |                   |
|--------------|-----------|------|------|-------------------|
| NM_170665    | ATP2A2    | 2916 | 2952 | 6.19987403585     |
| NM_170665    | ATP2A2    | 617  | 657  | 5.71444743705     |
| NM_170665    | ATP2A2    | 1204 | 1249 | 5.39234559939     |
| NM_170665    | ATP2A2    | 1400 | 1450 | 5.97730810011     |
| NM_170665    | ATP2A2    | 927  | 987  | 7.47998219096     |
| NM_170665    | ATP2A2    | 2264 | 2309 | 6.71444744459     |
| NM_170665    | ATP2A2    | 2613 | 2740 | 8.43691346907     |
| NM_170665    | ATP2A2    | 1556 | 1635 | 7.85195096834     |
| NM_170665    | ATP2A2    | 3188 | 3289 | 8.03637553948     |
| NM_170665    | ATP2A2    | 2070 | 2120 | 3.38850174953     |
| NM_170665    | ATP2A2    | 88   | 126  | 3.38850174953     |
| NM_170665    | ATP2A2    | 1362 | 1394 | 5.38850174953     |
| NM_170665    | ATP2A2    | 2967 | 3124 | 7.78483677249     |
| NM_170665    | ATP2A2    | 3334 | 3564 | 8.47998219096     |
| NM_170665    | ATP2A2    | 1105 | 1197 | 5.71444744459     |
| NM_170665    | ATP2A2    | 1485 | 1534 | 3.3925193497      |
| NM_170665    | ATP2A2    | 685  | 755  | 4.39251934216     |
| NM_170665    | ATP2A2    | 1848 | 1945 | 6.19987427176     |
| NM_170665    | ATP2A2    | 2200 | 2253 | 4.97748184288     |
| NM_001178115 | ZNF185    | 1403 | 1421 | 11.6355824303     |
| NM_015607    | CHTOP     | 932  | 992  | 7.51033333136     |
| NM_001100626 | ERLIN1    | 705  | 754  | 3.41128967404     |
| NM_001100626 | ERLIN1    | 1029 | 1091 | 4.41530054316     |
| NM_001100626 | ERLIN1    | 543  | 635  | 4.7372353691      |
| NM_021203    | SRPRB     | 517  | 569  | 8.03176733935     |
| NM_021203    | SRPRB     | 741  | 769  | 8.11573279841     |
| NM_021203    | SRPRB     | 1001 | 1088 | 9.96390345528     |
| NM_001146158 | MOGS      | 359  | 463  | 8.09906932619     |
| NM_001146158 | MOGS      | 1615 | 1721 | 7.83603492035     |
| NM_001146158 | MOGS      | 2163 | 2225 | 7.83586117003     |
| NM_001146152 | CYP51A1   | 1128 | 1187 | 7.99080373805     |
| NM_001146152 | CYP51A1   | 811  | 845  | 6.57576623878     |
| NM_001146152 | CYP51A1   | 611  | 698  | 6.99080373805     |
| NM_001146152 | CYP51A1   | 978  | 1015 | 6.57576623878     |
| NM_001146152 | CYP51A1   | 930  | 956  | 6.5717486386      |
| NM_001146152 | CYP51A1   | 763  | 807  | 6.99080350214     |
| NM_001146152 | CYP51A1   | 166  | 201  | 3.99062998774     |
| NM_001146152 | CYP51A1   | 853  | 888  | 6.57576600286     |
| NM_001146152 | CYP51A1   | 1015 | 1100 | 8.89769433366     |
| NM_001146152 | CYP51A1   | 440  | 506  | 7.1607287395      |
| NM_001146152 | CYP51A1   | 1315 | 1368 | 5.5717486386      |
| NM_001146152 | CYP51A1   | 263  | 346  | 6.99080373051     |
| NM_001146152 | CYP51A1   | 520  | 610  | 4.99080373805     |
| NM_021064    | HIST1H2AG |      | 283  | 329 9.30924466807 |
| NM_001142676 | CHID1     | 580  | 632  | 8.59030537702     |
| NM_001142676 | CHID1     | 696  | 758  | 5.59030537702     |
| NM_002127    | HLA-G     | 828  | 888  | 8.50432407836     |
| NM_002127    | HLA-G     | 940  | 1006 | 8.50432430673     |
| NM_133264    | WIPF2     | 40   | 80   | 7.46910858973     |
| NM_001166133 | FRAS1     | 1358 | 1431 | 10.7128630777     |

|              |          |      |      |                   |
|--------------|----------|------|------|-------------------|
| NM_001166133 | FRAS1    | 2487 | 2522 | 9.54293807623     |
| NM_001166133 | FRAS1    | 1302 | 1357 | 9.46281646702     |
| NM_001166133 | FRAS1    | 1698 | 1807 | 10.8688837713     |
| NM_000371    | TTR      | 142  | 188  | 1.97637681718     |
| NM_000371    | TTR      | 202  | 250  | 2.39141431646     |
| NM_001193343 | MRPS18A  | 30   | 81   | 5.62803714981     |
| NM_153615    | RGL4     | 159  | 177  | 10.9041912574     |
| NM_004859    | CLTC     | 3188 | 3234 | 5.87862087492     |
| NM_004859    | CLTC     | 3742 | 3778 | 6.77554952086     |
| NM_004859    | CLTC     | 2182 | 2213 | 5.65622845358     |
| NM_004859    | CLTC     | 4236 | 4276 | 5.3970378976      |
| NM_004859    | CLTC     | 4457 | 4530 | 4.07126595286     |
| NM_004859    | CLTC     | 4872 | 4931 | 5.66007230344     |
| NM_004859    | CLTC     | 1707 | 1796 | 5.07527682198     |
| NM_004501    | HNRNPU   | 613  | 717  | 3.93713888179     |
| NM_004501    | HNRNPU   | 1296 | 1370 | 2.35217637352     |
| NM_004852    | ONECUT2  | 152  | 198  | 9.57728877696     |
| NM_198129    | LAMA3    | 5929 | 5966 | 13.1620487486     |
| NM_000999    | RPL38    | 142  | 234  | 2.53193383904     |
| NM_000998    | RPL37A   | 208  | 307  | 1.01537965524     |
| NM_000990    | RPL27A   | 640  | 701  | 3.7687881058      |
| NM_000997    | RPL37    | 239  | 306  | 1.49211621085     |
| NM_000997    | RPL37    | 188  | 223  | 0.492116210853    |
| NM_002046    | GAPDH    | 816  | 866  | 2.45332395592     |
| NM_002046    | GAPDH    | 731  | 805  | 3.56880790439     |
| NM_002046    | GAPDH    | 686  | 719  | 0.864350586078    |
| NM_002046    | GAPDH    | 548  | 641  | 2.19028955008     |
| NM_015241    | MICAL3   | 7531 | 7579 | 10.2775775705     |
| NM_001163524 | ITPRIPL1 |      | 849  | 903 9.47618726245 |
| NM_001025234 | TSPAN4   | 335  | 388  | 8.69292377405     |
| NM_001025234 | TSPAN4   | 542  | 565  | 7.19210024679     |
| NM_001025234 | TSPAN4   | 794  | 854  | 9.51001097742     |
| NM_018279    | TMEM19   | 1082 | 1137 | 7.86727074006     |
| NM_001145408 | NONO     | 1642 | 1682 | 3.73889398191     |
| NM_015317    | PUM2     | 4669 | 4689 | 4.91446012214     |
| NM_012339    | TSPAN15  | 1410 | 1431 | 8.49216966467     |
| NM_012339    | TSPAN15  | 628  | 678  | 11.4120480555     |
| NM_014402    | UQCRQ    | 24   | 73   | 5.17624336288     |
| NM_005065    | SEL1L    | 2118 | 2160 | 6.18534409255     |
| NM_005065    | SEL1L    | 1018 | 1055 | 5.76628922901     |
| NM_005065    | SEL1L    | 831  | 902  | 6.77030009813     |
| NM_005065    | SEL1L    | 604  | 650  | 6.6861676198      |
| NM_005065    | SEL1L    | 2071 | 2106 | 6.18534409255     |
| NM_005065    | SEL1L    | 1129 | 1186 | 5.77013307887     |
| NM_005065    | SEL1L    | 1237 | 1282 | 6.18132672829     |
| NM_005065    | SEL1L    | 1446 | 1486 | 5.10120511908     |
| NM_005063    | SCD      | 980  | 1061 | 7.34078275708     |
| NM_005063    | SCD      | 1475 | 1494 | 2.86432612492     |
| NM_005063    | SCD      | 487  | 529  | 3.94846509838     |
| NM_005063    | SCD      | 249  | 311  | 4.27021967887     |

|           |          |      |      |               |               |
|-----------|----------|------|------|---------------|---------------|
| NM_005063 | SCD      | 4256 | 4283 | 4.44928862564 |               |
| NM_005063 | SCD      | 404  | 462  | 5.11839033552 |               |
| NM_005063 | SCD      | 837  | 965  | 7.70335283646 |               |
| NM_005063 | SCD      | 2336 | 2390 | 4.27038669813 |               |
| NM_005063 | SCD      | 1621 | 1677 | 3.52941023485 |               |
| NM_005063 | SCD      | 673  | 754  | 5.27039342918 |               |
| NM_005063 | SCD      | 2768 | 2806 | 4.27038669813 |               |
| NM_005063 | SCD      | 4631 | 4662 | 3.44928862564 |               |
| NM_005063 | SCD      | 1519 | 1580 | 4.9484653343  |               |
| NM_005063 | SCD      | 1221 | 1468 | 7.85535592991 |               |
| NM_005063 | SCD      | 565  | 635  | 4.94846533408 |               |
| NM_005063 | SCD      | 1064 | 1217 | 7.67638578886 |               |
| NM_001762 | CCT6A    | 782  | 814  | 3.8005458003  |               |
| NM_020928 | ZSWIM6   | 419  | 461  | 9.71962564676 |               |
| NM_001106 | ACVR2B   | 7692 | 7712 | 9.73307185548 |               |
| NM_001101 | ACTB     | 384  | 449  | 4.4140212333  |               |
| NM_001101 | ACTB     | 294  | 373  | 3.50713063769 |               |
| NM_001101 | ACTB     | 1346 | 1397 | 2.82905873258 |               |
| NM_001101 | ACTB     | 458  | 552  | 4.89944806047 |               |
| NM_001101 | ACTB     | 921  | 985  | 4.4140212333  |               |
| NM_001101 | ACTB     | 84   | 133  | 2.50712390664 |               |
| NM_001101 | ACTB     | 205  | 259  | 3.50712390664 |               |
| NM_001101 | ACTB     | 40   | 78   | 2.74491952319 |               |
| NM_001101 | ACTB     | 565  | 681  | 5.15098682746 |               |
| NM_001101 | ACTB     | 1055 | 1144 | 4.50713063769 |               |
| NM_001101 | ACTB     | 689  | 793  | 3.96656225633 |               |
| NM_001100 | ACTA1    | 1120 | 1171 | 10.7104813663 |               |
| NM_198332 | STAT2    | 542  | 563  | 7.26268947507 |               |
| NM_016142 | HSD17B12 |      | 589  | 643           | 5.19432015454 |
| NM_016142 | HSD17B12 |      | 775  | 840           | 6.19432688559 |
| NM_016142 | HSD17B12 |      | 517  | 564           | 5.51223738031 |
| NM_016142 | HSD17B12 |      | 955  | 1009          | 4.11018767621 |
| NM_016145 | C19orf56 |      | 500  | 556           | 8.6676359899  |
| NM_198335 | GANAB    | 1773 | 1840 | 6.17198652554 |               |
| NM_198335 | GANAB    | 804  | 878  | 7.17198676146 |               |
| NM_198335 | GANAB    | 2608 | 2683 | 8.04645587938 |               |
| NM_198335 | GANAB    | 3582 | 3648 | 7.39437894688 |               |
| NM_198335 | GANAB    | 752  | 792  | 7.39437245175 |               |
| NM_198335 | GANAB    | 1919 | 1985 | 8.67448710199 |               |
| NM_198335 | GANAB    | 119  | 186  | 6.90895235562 |               |
| NM_198335 | GANAB    | 878  | 1016 | 10.2308804505 |               |
| NM_198335 | GANAB    | 3155 | 3190 | 6.08784755208 |               |
| NM_198335 | GANAB    | 3522 | 3580 | 6.58300666057 |               |
| NM_198335 | GANAB    | 2558 | 2599 | 6.16796916129 |               |
| NM_198335 | GANAB    | 2018 | 2153 | 9.3943791828  |               |
| NM_198335 | GANAB    | 2209 | 2259 | 7.58702426074 |               |
| NM_198335 | GANAB    | 1177 | 1361 | 10.3943791828 |               |
| NM_198335 | GANAB    | 1365 | 1521 | 9.8724264796  |               |
| NM_198335 | GANAB    | 2389 | 2489 | 8.28746397888 |               |
| NM_198335 | GANAB    | 2923 | 3025 | 9.04645587938 |               |

|              |           |      |      |               |               |
|--------------|-----------|------|------|---------------|---------------|
| NM_198335    | GANAB     | 1605 | 1717 | 8.97934168352 |               |
| NM_198335    | GANAB     | 1033 | 1164 | 10.2594496027 |               |
| NM_198335    | GANAB     | 631  | 720  | 8.58702426074 |               |
| NM_198335    | GANAB     | 2765 | 2922 | 9.54122057113 |               |
| NM_198335    | GANAB     | 3199 | 3278 | 6.08784755208 |               |
| NM_198335    | GANAB     | 342  | 630  | 10.1416131124 |               |
| NM_017814    | TMEM161A  |      | 981  | 1030          | 11.591453005  |
| NM_017814    | TMEM161A  |      | 463  | 497           | 8.78008048274 |
| NM_017814    | TMEM161A  |      | 678  | 786           | 12.3690605836 |
| NM_017814    | TMEM161A  |      | 296  | 429           | 12.2435297015 |
| NM_017811    | UBE2R2    | 1193 | 1229 | 5.09088775997 |               |
| NM_017813    | IMPAD1    | 201  | 244  | 7.53222485202 |               |
| NM_138426    | GLCCI1    | 425  | 448  | 10.6087762916 |               |
| NM_198841    | FAM120AOS |      | 2184 | 2204          | 10.1003366629 |
| NM_198591    | BSG       | 1250 | 1291 | 3.79513504412 |               |
| NM_198591    | BSG       | 373  | 442  | 3.60249020209 |               |
| NM_198591    | BSG       | 301  | 355  | 1.79513528003 |               |
| NM_198591    | BSG       | 1313 | 1400 | 3.60249020187 |               |
| NM_198591    | BSG       | 472  | 620  | 5.96506028148 |               |
| NM_198591    | BSG       | 688  | 949  | 7.09891602821 |               |
| NM_024334    | TMEM43    | 447  | 470  | 8.19227195631 |               |
| NM_024334    | TMEM43    | 947  | 1009 | 8.99560927842 |               |
| NM_178862    | STT3B     | 1620 | 1687 | 7.7185150432  |               |
| NM_178862    | STT3B     | 2013 | 2047 | 6.71449745057 |               |
| NM_178862    | STT3B     | 1938 | 1965 | 5.04941334064 |               |
| NM_178862    | STT3B     | 1363 | 1414 | 5.1335525498  |               |
| NM_178865    | SERINC2   | 765  | 815  | 8.78559576656 |               |
| NM_178865    | SERINC2   | 621  | 719  | 9.88513144033 |               |
| NM_178865    | SERINC2   | 389  | 434  | 7.55918574527 |               |
| NM_178865    | SERINC2   | 1113 | 1200 | 6.97824083717 |               |
| NM_178865    | SERINC2   | 1373 | 1499 | 8.97824084472 |               |
| NM_001078175 | SLC29A1   | 1436 | 1477 | 9.67255866846 |               |
| NM_001078175 | SLC29A1   | 1002 | 1045 | 7.26649809525 |               |
| NM_006579    | EBP       | 740  | 837  | 9.05283758878 |               |
| NM_006579    | EBP       | 639  | 712  | 8.13529974897 |               |
| NM_006579    | EBP       | 275  | 325  | 7.96537474752 |               |
| NM_006579    | EBP       | 236  | 272  | 7.5503305172  |               |
| NM_006579    | EBP       | 842  | 941  | 8.55033724825 |               |
| NM_006579    | EBP       | 411  | 507  | 9.13529974897 |               |
| NM_006579    | EBP       | 332  | 408  | 8.28730284242 |               |
| NM_003051    | SLC16A1   | 1620 | 1655 | 5.16703931184 |               |
| NM_003051    | SLC16A1   | 799  | 849  | 5.65246637493 |               |
| NM_003051    | SLC16A1   | 708  | 735  | 5.76097224349 |               |
| NM_003051    | SLC16A1   | 1516 | 1579 | 6.54555117101 |               |
| NM_003051    | SLC16A1   | 997  | 1049 | 4.43006722254 |               |
| NM_003051    | SLC16A1   | 1415 | 1468 | 4.43007395359 |               |
| NM_003051    | SLC16A1   | 627  | 667  | 5.16703954021 |               |
| NM_003051    | SLC16A1   | 1218 | 1332 | 4.84511145287 |               |
| NM_001197319 | CLEC2D    | 889  | 937  | 8.09558405323 |               |
| NM_002901    | RCN1      | 791  | 822  | 7.50149295788 |               |

|              |          |       |       |                    |
|--------------|----------|-------|-------|--------------------|
| NM_002901    | RCN1     | 903   | 947   | 5.17956486299      |
| NM_002901    | RCN1     | 589   | 678   | 6.50149968893      |
| NM_001190836 | DCTN1    | 1642  | 1662  | 4.00137628007      |
| NM_014918    | CHSY1    | 1853  | 1879  | 8.47222320968      |
| NM_031284    | ADPGK    | 1090  | 1149  | 6.70694380584      |
| NM_032737    | LMNB2    | 1019  | 1080  | 7.30962349686      |
| NM_001005498 | RHBDF2   | 2373  | 2423  | 10.1076665335      |
| NM_015127    | CLCC1    | 754   | 798   | 9.08124106381      |
| NM_015127    | CLCC1    | 1261  | 1316  | 8.49627855554      |
| NM_033280    | SEC11C   | 470   | 510   | 5.83410489825      |
| NM_003262    | SEC62    | 955   | 1047  | 5.61691983802      |
| NM_003262    | SEC62    | 1129  | 1177  | 2.72542570658      |
| NM_003262    | SEC62    | 813   | 859   | 4.39452718077      |
| NM_001031696 | PLD3     | 822   | 874   | 9.49113866565      |
| NM_001031696 | PLD3     | 1850  | 1906  | 8.61649579742      |
| NM_001031696 | PLD3     | 1358  | 1406  | 9.83906196907      |
| NM_001031696 | PLD3     | 772   | 818   | 8.61265194757      |
| NM_001031696 | PLD3     | 1232  | 1276  | 9.93859764263      |
| NM_001031696 | PLD3     | 1307  | 1344  | 9.03170031596      |
| NM_001031696 | PLD3     | 658   | 704   | 9.03170704701      |
| NM_001031696 | PLD3     | 2030  | 2068  | 8.02768944684      |
| NM_001031696 | PLD3     | 455   | 511   | 9.49113866565      |
| NM_001031696 | PLD3     | 1649  | 1812  | 10.7321467652      |
| NM_001031696 | PLD3     | 1420  | 1625  | 10.5552690031      |
| NM_001031696 | PLD3     | 1035  | 1155  | 11.1191698883      |
| NM_003618    | MAP4K3   | 163   | 191   | 4.32182348724      |
| NM_033467    | MMEL1    | 665   | 687   | 11.2882606744      |
| NM_001376    | DYNC1H1  | 8877  | 8945  | 7.47389612955      |
| NM_001376    | DYNC1H1  | 14017 | 14051 | 6.47790699867      |
| NM_001376    | DYNC1H1  | 11441 | 11494 | 6.05885863027      |
| NM_001376    | DYNC1H1  | 9987  | 10056 | 7.28125105161      |
| NM_001376    | DYNC1H1  | 2523  | 2591  | 6.47389612955      |
| NM_001376    | DYNC1H1  | 4760  | 4799  | 6.05885863027      |
| NM_001376    | DYNC1H1  | 2777  | 2808  | 6.71570261522      |
| NM_001376    | DYNC1H1  | 9066  | 9138  | 6.06286949939      |
| NM_001376    | DYNC1H1  | 9754  | 9843  | 8.06287623044      |
| NM_001376    | DYNC1H1  | 4462  | 4520  | 4.47389612955      |
| NM_001376    | DYNC1H1  | 12262 | 12342 | 6.39377452034      |
| NM_001377    | DYNC2H1  | 1047  | 1067  | 13.4261888072      |
| NM_015544    | TMEM98   | 974   | 1050  | 4.83033921454      |
| NM_015544    | TMEM98   | 895   | 971   | 4.83051296485      |
| NM_018317    | TBC1D19  | 575   | 594   | 11.4722467605      |
| NM_000355    | TCN2     | 67    | 88    | 11.3417683739      |
| NM_000354    | SERPINA7 |       | 1096  | 1122 3.6943297507  |
| NM_000354    | SERPINA7 |       | 1140  | 1177 5.28313610128 |
| NM_000428    | LTBP2    | 2952  | 3000  | 11.3426653072      |
| NM_000428    | LTBP2    | 5694  | 5751  | 15.0471226255      |
| NM_000428    | LTBP2    | 4016  | 4054  | 12.8475061987      |
| NM_000428    | LTBP2    | 2058  | 2112  | 14.1540375935      |
| NM_000428    | LTBP2    | 4403  | 4503  | 13.3466761763      |

|              |         |      |      |                |
|--------------|---------|------|------|----------------|
| NM_000428    | LTBP2   | 493  | 544  | 12.8475061987  |
| NM_000428    | LTBP2   | 2343 | 2424 | 13.6686042712  |
| NM_000428    | LTBP2   | 5245 | 5300 | 12.8475061987  |
| NM_006811    | SERINC3 | 659  | 705  | 7.17695794451  |
| NM_006811    | SERINC3 | 784  | 810  | 4.85887369948  |
| NM_006816    | LMAN2   | 1203 | 1237 | 4.06458258654  |
| NM_006816    | LMAN2   | 916  | 966  | 6.39052827406  |
| NM_006816    | LMAN2   | 693  | 758  | 6.06860018671  |
| NM_006816    | LMAN2   | 807  | 865  | 6.23852518815  |
| NM_006816    | LMAN2   | 525  | 552  | 5.30638907222  |
| NM_006816    | LMAN2   | 334  | 403  | 4.06458258654  |
| NM_001190946 | FAM193B | 13   | 62   | 9.6879047674   |
| NM_006815    | TMED2   | 251  | 309  | 3.13340279123  |
| NM_006815    | TMED2   | 30   | 69   | 0.811474932266 |
| NM_003334    | UBA1    | 29   | 65   | 6.41669676991  |
| NM_006744    | RBP4    | 869  | 925  | 1.59086153907  |
| NM_006744    | RBP4    | 272  | 429  | 5.23873532902  |
| NM_006744    | RBP4    | 691  | 738  | 3.17984163975  |
| NM_006744    | RBP4    | 628  | 667  | 2.40222733025  |
| NM_006744    | RBP4    | 434  | 623  | 4.95243114387  |
| NM_006744    | RBP4    | 61   | 226  | 4.23873532902  |
| NM_006745    | MSM01   | 925  | 955  | 7.26548255576  |
| NM_006745    | MSM01   | 695  | 796  | 8.57201418648  |
| NM_020132    | AGPAT3  | 518  | 564  | 5.32567996198  |
| NM_172351    | CD46    | 409  | 456  | 7.37908178402  |
| NM_172351    | CD46    | 66   | 149  | 7.18661044884  |
| NM_172351    | CD46    | 801  | 835  | 5.964211304    |
| NM_172351    | CD46    | 678  | 733  | 5.88007882567  |
| NM_172351    | CD46    | 302  | 371  | 6.70118362922  |
| NM_172351    | CD46    | 1132 | 1188 | 7.18661045617  |
| NM_172351    | CD46    | 569  | 634  | 7.7011833933   |
| NM_007293    | C4A     | 4642 | 4687 | 4.67386023842  |
| NM_007293    | C4A     | 2619 | 2701 | 6.89642641008  |
| NM_007293    | C4A     | 1512 | 1551 | 5.41099285185  |
| NM_007293    | C4A     | 4288 | 4363 | 3.0890712521   |
| NM_007293    | C4A     | 2313 | 2357 | 4.00493227863  |
| NM_007293    | C4A     | 3426 | 3476 | 4.08906475696  |
| NM_007293    | C4A     | 1997 | 2043 | 4.08505388785  |
| NM_007293    | C4A     | 3502 | 3542 | 4.00493227863  |
| NM_007293    | C4A     | 4759 | 4830 | 4.67403398119  |
| NM_007293    | C4A     | 2765 | 2803 | 5.41099285185  |
| NM_007293    | C4A     | 4538 | 4590 | 5.0888977377   |
| NM_007293    | C4A     | 4854 | 4901 | 3.08505388785  |
| NM_007293    | C4A     | 5061 | 5123 | 3.0890714878   |
| NM_007293    | C4A     | 165  | 213  | 4.08505388785  |
| NM_007293    | C4A     | 5152 | 5204 | 3.0890712521   |
| NM_007293    | C4A     | 890  | 980  | 6.08907148802  |
| NM_007293    | C4A     | 2389 | 2492 | 6.78951120616  |
| NM_007293    | C4A     | 3059 | 3132 | 5.08907148802  |
| NM_007293    | C4A     | 2834 | 2950 | 5.41099958291  |

|              |          |      |      |                     |
|--------------|----------|------|------|---------------------|
| NM_007293    | C4A      | 4457 | 4527 | 5.08907148802       |
| NM_007293    | C4A      | 1911 | 1992 | 4.67403398874       |
| NM_007293    | C4A      | 2214 | 2281 | 5.41099958291       |
| NM_007293    | C4A      | 3637 | 3685 | 4.58989477936       |
| NM_001102416 | KNG1     | 652  | 690  | 9.00302386623       |
| NM_001102416 | KNG1     | 869  | 920  | 7.33392215613       |
| NM_001102416 | KNG1     | 1501 | 1530 | 6.41805463446       |
| NM_001102416 | KNG1     | 765  | 824  | 9.41806136551       |
| NM_001102416 | KNG1     | 1325 | 1372 | 9.00285011591       |
| NM_001102416 | KNG1     | 403  | 447  | 8.41806136551       |
| NM_001102416 | KNG1     | 492  | 575  | 10.3249519611       |
| NM_001102416 | KNG1     | 1221 | 1271 | 9.22541628002       |
| NM_001102416 | KNG1     | 1016 | 1040 | 6.41404376534       |
| NM_0071111   | TFDP1    | 1580 | 1632 | 4.10085510613       |
| NM_001201380 | CNTNAP3B |      | 2405 | 2429 11.6952932245  |
| NM_005591    | MRE11A   | 2948 | 2994 | 8.39430706329       |
| NM_015331    | NCSTN    | 912  | 958  | 7.26249428757       |
| NM_015331    | NCSTN    | 1179 | 1232 | 8.02470516615       |
| NM_015331    | NCSTN    | 1493 | 1630 | 8.48413702071       |
| NM_015331    | NCSTN    | 1394 | 1468 | 7.60966790279       |
| NM_001145426 | CSDA     | 657  | 676  | 4.84840698803       |
| NM_001197129 | SYS1     | 630  | 672  | 10.3881389739       |
| NM_018259    | TTC17    | 1649 | 1693 | 6.83960034679       |
| NM_018259    | TTC17    | 2481 | 2560 | 7.10665235258       |
| NM_018259    | TTC17    | 774  | 823  | 6.10647860248       |
| NM_012310    | KIF4A    | 92   | 158  | 7.25562707996       |
| NM_005730    | CTDSP2   | 1545 | 1590 | 5.88154440383       |
| NM_005040    | PRCP     | 390  | 457  | 8.14582804707       |
| NM_005040    | PRCP     | 908  | 961  | 8.47177350621       |
| NM_001294    | CLPTM1   | 1868 | 1909 | 6.08039764964       |
| NM_001294    | CLPTM1   | 1175 | 1221 | 5.08039764209       |
| NM_001294    | CLPTM1   | 1010 | 1042 | 3.49542841787       |
| NM_001294    | CLPTM1   | 1476 | 1516 | 4.4952613986        |
| NM_001294    | CLPTM1   | 1638 | 1669 | 5.49141754875       |
| NM_001294    | CLPTM1   | 1823 | 1862 | 4.99625844026       |
| NM_001294    | CLPTM1   | 819  | 880  | 7.74336266237       |
| NM_001294    | CLPTM1   | 519  | 657  | 8.01899710498       |
| NM_182685    | EFNA1    | 593  | 637  | 7.94347623096       |
| NM_013993    | DDR1     | 2311 | 2344 | 9.33786018594       |
| NM_013993    | DDR1     | 2109 | 2138 | 9.25372770761       |
| NM_172037    | RDH10    | 1329 | 1370 | 9.66031910861       |
| NM_172037    | RDH10    | 1275 | 1325 | 10.3294140877       |
| NM_172037    | RDH10    | 1120 | 1188 | 9.74445831799       |
| NM_001101648 | NPC1L1   | 3562 | 3602 | 9.75270698509       |
| NM_001101648 | NPC1L1   | 797  | 864  | 11.6442011165       |
| NM_001101648 | NPC1L1   | 2562 | 2615 | 10.07463508         |
| NM_001122    | PLIN2    | 485  | 553  | 0.280622081708      |
| NM_007355    | HSP90AB1 |      | 1849 | 1913 0.763062259824 |
| NM_007355    | HSP90AB1 |      | 365  | 415 0.843183869035  |
| NM_007355    | HSP90AB1 |      | 1196 | 1238 0.348024760545 |

|              |              |      |                 |                |
|--------------|--------------|------|-----------------|----------------|
| NM_007355    | HSP90AB1     | 1304 | 1346            | 0.348024760545 |
| NM_007355    | HSP90AB1     | 2104 | 2165            | 0.43216396238  |
| NM_007355    | HSP90AB1     | 1361 | 1429            | 1.16912932818  |
| NM_001042724 | PVRL2 2241   | 2296 | 9.65600280539   |                |
| NM_001042724 | PVRL2 1196   | 1247 | 10.0039261088   |                |
| NM_001042724 | PVRL2 535    | 617  | 9.51849928164   |                |
| NM_001042724 | PVRL2 680    | 730  | 8.19639743644   |                |
| NM_001042724 | PVRL2 1841   | 1895 | 7.69739447809   |                |
| NM_199444    | COPE 510     | 583  | 7.18067877123   |                |
| NM_199440    | HSPD1 1615   | 1669 | 0.574681237214  |                |
| NM_199440    | HSPD1 873    | 914  | 2.03428637025   |                |
| NM_199440    | HSPD1 1278   | 1353 | 1.57485498753   |                |
| NM_199440    | HSPD1 1085   | 1139 | 1.38203615927   |                |
| NM_199440    | HSPD1 1562   | 1593 | 0.574848256479  |                |
| NM_024682    | TBC1D17 1644 | 1663 | 7.63897816544   |                |
| NM_003299    | HSP90B1 1467 | 1514 | 1.97458597481   |                |
| NM_003299    | HSP90B1 2168 | 2216 | 0.875050301258  |                |
| NM_003299    | HSP90B1 1404 | 1460 | 0.0676953716513 |                |
| NM_003299    | HSP90B1 1657 | 1716 | 2.31562289264   |                |
| NM_003299    | HSP90B1 2136 | 2165 | 1.52712676192   |                |
| NM_003299    | HSP90B1 1336 | 1403 | 1.97458597481   |                |
| NM_003299    | HSP90B1 1758 | 1798 | -0.932478371117 |                |
| NM_003299    | HSP90B1 1016 | 1063 | 1.38962347409   |                |
| NM_003299    | HSP90B1 136  | 179  | 1.38962346654   |                |
| NM_003299    | HSP90B1 840  | 889  | 1.23762038064   |                |
| NM_003299    | HSP90B1 1514 | 1551 | -0.932311351853 |                |
| NM_003299    | HSP90B1 587  | 622  | 0.652657644003  |                |
| NM_003299    | HSP90B1 457  | 579  | 2.97458597481   |                |
| NM_003299    | HSP90B1 890  | 963  | 1.38962347409   |                |
| NM_003299    | HSP90B1 1553 | 1612 | 1.97458597481   |                |
| NM_003299    | HSP90B1 676  | 759  | 1.38962347409   |                |
| NM_003299    | HSP90B1 241  | 344  | 2.31562289264   |                |
| NM_003299    | HSP90B1 1081 | 1196 | 2.59125733526   |                |
| NM_003299    | HSP90B1 1800 | 1927 | 2.23762038064   |                |
| NM_003299    | HSP90B1 2239 | 2343 | 2.59125733526   |                |
| NM_003299    | HSP90B1 1949 | 2132 | 3.76813509734   |                |
| NM_003299    | HSP90B1 2382 | 2552 | 2.31562289264   |                |
| NM_003299    | HSP90B1 372  | 445  | 0.875043570205  |                |
| NM_003295    | TPT1 270     | 320  | -0.52875943681  |                |
| NM_003295    | TPT1 1756    | 1805 | 0.471414313286  |                |
| NM_004952    | EFNA3 38     | 65   | 11.2624898031   |                |
| NM_006005    | WFS1 1963    | 2011 | 5.82923712935   |                |
| NM_006559    | KHDRBS1 1108 | 1162 | 4.66797196047   |                |
| NM_006559    | KHDRBS1 831  | 892  | 5.75193741953   |                |
| NM_005927    | MFAP3 966    | 1020 | 8.9730520785    |                |
| NM_005927    | MFAP3 718    | 747  | 8.16167955627   |                |
| NM_079423    | MYL6 555     | 597  | 2.10051132993   |                |
| NM_079423    | MYL6 357     | 434  | 0.18465053176   |                |
| NM_002654    | PKM2 1932    | 2006 | 3.80831863321   |                |
| NM_002654    | PKM2 452     | 519  | 3.48639076669   |                |



|              |          |      |      |               |               |
|--------------|----------|------|------|---------------|---------------|
| NM_002654    | PKM2     | 1714 | 1782 | 3.48639077424 |               |
| NM_002654    | PKM2     | 1145 | 1195 | 3.65630904463 |               |
| NM_002654    | PKM2     | 1212 | 1263 | 3.65631577568 |               |
| NM_002654    | PKM2     | 756  | 819  | 1.98721406558 |               |
| NM_013437    | LRP12    | 19   | 60   | 10.7327584679 |               |
| NM_015103    | PLXND1   | 2778 | 2828 | 7.96374578973 |               |
| NM_019592    | RNF20    | 1669 | 1694 | 6.16534773501 |               |
| NM_052925    | LENG8    | 1582 | 1603 | 7.26991990119 |               |
| NM_001358    | DHX15    | 1245 | 1311 | 5.13083409    |               |
| NM_022044    | SDF2L1   | 515  | 563  | 7.87011149317 |               |
| NM_178031    | TMEM132A |      | 266  | 347           | 11.7780305793 |
| NM_178031    | TMEM132A |      | 52   | 84            | 9.77820409367 |
| NM_182547    | TMED4    | 599  | 650  | 6.67486789222 |               |
| NM_001005619 | ITGB4    | 1761 | 1803 | 13.0120271714 |               |
| NM_001005619 | ITGB4    | 1935 | 1958 | 10.927888198  |               |
| NM_004099    | STOM     | 678  | 731  | 6.03609519501 |               |
| NM_004099    | STOM     | 563  | 588  | 3.63002789074 |               |
| NM_004099    | STOM     | 441  | 527  | 6.52152202218 |               |
| NM_000405    | GM2A     | 694  | 730  | 9.42484173618 |               |
| NM_006836    | GCN1L1   | 2542 | 2595 | 5.45259379859 |               |
| NM_006836    | GCN1L1   | 893  | 924  | 7.03755629932 |               |
| NM_006836    | GCN1L1   | 495  | 556  | 8.53673300776 |               |
| NM_004898    | CLOCK    | 5385 | 5403 | 7.71236585638 |               |
| NM_004897    | MINPP1   | 845  | 903  | 9.54922699191 |               |
| NM_004897    | MINPP1   | 1060 | 1086 | 7.96409074087 |               |
| NM_004897    | MINPP1   | 1552 | 1611 | 7.54905324159 |               |
| NM_004897    | MINPP1   | 586  | 657  | 8.54922026086 |               |
| NM_020117    | LARS     | 3804 | 3828 | 5.4973197308  |               |
| NM_004541    | NDUFA1   | 165  | 219  | 4.46220013262 |               |
| NM_004861    | GAL3ST1  | 968  | 1029 | 10.0904156173 |               |
| NM_004549    | NDUFC2   | 664  | 744  | 6.23089015721 |               |
| NM_198475    | FAM171A2 |      | 2062 | 2104          | 13.6357433392 |
| NM_198475    | FAM171A2 |      | 1918 | 1959          | 12.0547984384 |
| NM_006768    | BRAP     | 238  | 258  | 6.34187913506 |               |
| NM_006761    | YWHAE    | 873  | 912  | 1.53155829446 |               |
| NM_001164603 | ASXL1    | 414  | 450  | 5.64126568409 |               |
| NM_004747    | DLG5     | 3032 | 3099 | 6.5548390942  |               |
| NM_006423    | RABAC1   | 346  | 386  | 10.0254729674 |               |
| NM_014624    | S100A6   | 444  | 509  | 6.30542192011 |               |
| NM_003713    | PPAP2B   | 804  | 875  | 8.92503056364 |               |
| NM_003714    | STC2     | 1769 | 1862 | 8.53483319274 |               |
| NM_001145442 | POTEM    | 2011 | 2042 | 12.6759676247 |               |
| NM_001145442 | POTEM    | 2305 | 2365 | 12.6761411391 |               |
| NM_014999    | RAB21    | 263  | 295  | 3.59222216373 |               |
| NM_014448    | ARHGEF16 |      | 125  | 183           | 7.99332528276 |
| NM_001163922 | VSIG10L  | 136  | 155  | 13.4425441245 |               |
| NM_017771    | PXK      | 2924 | 2943 | 7.262314313   |               |
| NM_019109    | ALG1     | 1172 | 1231 | 8.44128031405 |               |
| NM_019101    | APOM     | 347  | 436  | 7.45518320451 |               |
| NM_016103    | SAR1B    | 425  | 482  | 8.38413715056 |               |

|              |       |      |      |               |
|--------------|-------|------|------|---------------|
| NM_016103    | SAR1B | 606  | 706  | 7.06238257007 |
| NM_015716    | MINK1 | 20   | 44   | 5.28020967551 |
| NM_144765    | MPZL2 | 525  | 613  | 5.21453346843 |
| NM_144765    | MPZL2 | 769  | 877  | 7.88363517854 |
| NM_000099    | CST3  | 434  | 483  | 6.34525450963 |
| NM_000099    | CST3  | 590  | 701  | 4.09732026514 |
| NM_000099    | CST3  | 515  | 585  | 5.09732026514 |
| NM_000096    | CP    | 324  | 367  | 4.40782647033 |
| NM_000096    | CP    | 2158 | 2225 | 4.67086087617 |
| NM_000096    | CP    | 3170 | 3211 | 4.67086087617 |
| NM_000096    | CP    | 1847 | 1907 | 4.25582337688 |
| NM_000096    | CP    | 889  | 935  | 4.08589837545 |
| NM_000096    | CP    | 724  | 785  | 2.67068712585 |
| NM_000096    | CP    | 1062 | 1103 | 3.08589164439 |
| NM_000096    | CP    | 1376 | 1439 | 3.08188077528 |
| NM_000096    | CP    | 810  | 851  | 3.08589837545 |
| NM_000096    | CP    | 1446 | 1483 | 2.08188077528 |
| NM_000096    | CP    | 3536 | 3594 | 3.08188077528 |
| NM_000096    | CP    | 1216 | 1279 | 3.0858983679  |
| NM_000096    | CP    | 1952 | 1985 | 3.666843276   |
| NM_000096    | CP    | 2839 | 2922 | 4.67086087617 |
| NM_000096    | CP    | 2603 | 2681 | 2.67086087616 |
| NM_000096    | CP    | 1145 | 1216 | 3.08572462513 |
| NM_000096    | CP    | 1778 | 1819 | 1.08589164439 |
| NM_004390    | CTSH  | 983  | 1011 | 4.11784176893 |
| NM_004390    | CTSH  | 1402 | 1435 | 5.93492897231 |
| NM_004390    | CTSH  | 152  | 202  | 4.20197424726 |
| NM_004390    | CTSH  | 427  | 477  | 2.61300087742 |
| NM_004390    | CTSH  | 797  | 905  | 6.5239090732  |
| NM_004390    | CTSH  | 506  | 655  | 5.61701847759 |
| NM_003017    | SRSF3 | 231  | 275  | 4.00603277035 |
| NM_001145293 | NGLY1 | 1068 | 1091 | 4.46667119639 |
| NM_001079804 | GAA   | 1677 | 1750 | 8.25946399851 |
| NM_001079804 | GAA   | 2058 | 2099 | 9.06664540617 |
| NM_001079804 | GAA   | 1885 | 1926 | 8.25544663426 |
| NM_001079804 | GAA   | 1927 | 1974 | 8.58138559827 |
| NM_001079804 | GAA   | 2293 | 2334 | 8.25544663426 |
| NM_001079804 | GAA   | 591  | 635  | 8.25929048411 |
| NM_001079804 | GAA   | 2670 | 2713 | 7.25544663426 |
| NM_001079804 | GAA   | 726  | 807  | 9.06681242544 |
| NM_002636    | PHF1  | 113  | 138  | 7.52071559172 |
| NM_002634    | PHB   | 418  | 464  | 5.55618059755 |
| NM_002634    | PHB   | 576  | 612  | 3.5521632333  |
| NM_002630    | PGC   | 244  | 328  | 6.99885726309 |
| NM_002630    | PGC   | 1212 | 1279 | 6.26171815452 |
| NM_002631    | PGD   | 1217 | 1275 | 5.14810670443 |
| NM_002631    | PGD   | 698  | 770  | 3.14408911181 |
| NM_014292    | CBX6  | 244  | 262  | 11.9683304232 |
| NM_014294    | TRAM1 | 1436 | 1501 | 7.13408095138 |
| NM_014294    | TRAM1 | 312  | 383  | 6.79916506131 |

|              |         |      |      |               |
|--------------|---------|------|------|---------------|
| NM_014294    | TRAM1   | 1330 | 1372 | 8.3881451622  |
| NM_014294    | TRAM1   | 784  | 818  | 5.13408095138 |
| NM_014294    | TRAM1   | 881  | 936  | 8.21822016076 |
| NM_014294    | TRAM1   | 1205 | 1247 | 7.7190434521  |
| NM_014294    | TRAM1   | 1002 | 1089 | 9.3881451622  |
| NM_014294    | TRAM1   | 1109 | 1185 | 9.02557508282 |
| NM_021978    | ST14    | 1823 | 1873 | 13.0477843352 |
| NM_021978    | ST14    | 1936 | 2012 | 13.0479578496 |
| NM_152280    | SYT11   | 929  | 969  | 13.657713332  |
| NM_001077516 | SLC39A7 | 489  | 553  | 5.94512328613 |
| NM_001077516 | SLC39A7 | 563  | 619  | 5.45987020172 |
| NM_001077516 | SLC39A7 | 1453 | 1493 | 6.59736700197 |
| NM_001077516 | SLC39A7 | 754  | 794  | 4.13794211438 |
| NM_001077516 | SLC39A7 | 172  | 249  | 6.30786687991 |
| NM_001077516 | SLC39A7 | 882  | 910  | 3.053802905   |
| NM_001077516 | SLC39A7 | 809  | 882  | 5.13794211439 |
| NM_001077516 | SLC39A7 | 676  | 752  | 6.45987020927 |
| NM_001077516 | SLC39A7 | 1007 | 1201 | 7.53025953716 |
| NM_033420    | C19orf6 | 315  | 377  | 5.43151528814 |
| NM_033420    | C19orf6 | 1135 | 1171 | 7.75344338302 |
| NM_033420    | C19orf6 | 239  | 300  | 8.02048865798 |
| NM_014873    | LPGAT1  | 538  | 598  | 8.35754460565 |
| NM_012434    | SLC17A5 | 1576 | 1633 | 9.93994200678 |
| NM_178014    | TUBB    | 613  | 687  | 3.9481665074  |
| NM_178014    | TUBB    | 427  | 460  | 3.6811145014  |
| NM_178014    | TUBB    | 913  | 1014 | 5.36320400669 |
| NM_178014    | TUBB    | 1288 | 1337 | 2.86402729802 |
| NM_178014    | TUBB    | 1234 | 1286 | 3.36320399914 |
| NM_178014    | TUBB    | 721  | 801  | 2.94815977635 |
| NM_178014    | TUBB    | 1490 | 1585 | 4.36320400669 |
| NM_203372    | ACSL3   | 819  | 864  | 3.25364360451 |
| NM_203372    | ACSL3   | 620  | 678  | 3.73505283905 |
| NM_203372    | ACSL3   | 1994 | 2057 | 4.10164051861 |
| NM_203372    | ACSL3   | 2252 | 2300 | 2.51667128684 |
| NM_203372    | ACSL3   | 1253 | 1313 | 3.93171550962 |
| NM_203372    | ACSL3   | 1589 | 1665 | 4.73907043923 |
| NM_203372    | ACSL3   | 1716 | 1861 | 5.45527747323 |
| NM_005232    | EPHA1   | 1627 | 1647 | 9.41767065073 |
| NM_005232    | EPHA1   | 842  | 882  | 11.0827547607 |
| NM_005232    | EPHA1   | 2910 | 2949 | 8.83270815001 |
| NM_004704    | RRP9    | 595  | 619  | 8.89754770772 |
| NM_004705    | PRKRIR  | 1891 | 1910 | 4.89261920426 |
| NM_006854    | KDEL2   | 700  | 768  | 6.49439013062 |
| NM_006854    | KDEL2   | 489  | 547  | 5.17246203573 |
| NM_006854    | KDEL2   | 561  | 690  | 8.17246203573 |
| NM_006854    | KDEL2   | 161  | 252  | 5.97981695779 |
| NM_001146069 | MFSD10  | 1627 | 1680 | 10.5133820557 |
| NM_001146069 | MFSD10  | 1168 | 1216 | 10.1113323516 |
| NM_001146069 | MFSD10  | 749  | 797  | 9.11133235156 |
| NM_020170    | NCLN    | 1209 | 1269 | 9.43194564986 |

|           |      |      |      |                  |
|-----------|------|------|------|------------------|
| NM_020170 | NCLN | 153  | 216  | 7.76284393975    |
| NM_020170 | NCLN | 1585 | 1631 | 7.84296554896    |
| NM_004563 | PCK2 | 58   | 79   | 4.40844344557    |
| NM_000289 | PFKM | 1126 | 1146 | 9.43212889342    |
| NM_002026 | FN1  | 4337 | 4428 | 2.85887969694    |
| NM_002026 | FN1  | 4609 | 4648 | 0.984410579028   |
| NM_002026 | FN1  | 2820 | 2891 | 2.30633867392    |
| NM_002026 | FN1  | 5585 | 5640 | 0.399448078301   |
| NM_002026 | FN1  | 600  | 683  | 3.48691091956    |
| NM_002026 | FN1  | 6231 | 6269 | -1.60055192924   |
| NM_002026 | FN1  | 6274 | 6311 | 1.85887969694    |
| NM_002026 | FN1  | 5715 | 5816 | 4.01415792242    |
| NM_002026 | FN1  | 3392 | 3473 | 0.984410579028   |
| NM_002026 | FN1  | 2567 | 2615 | 1.72137617319    |
| NM_002026 | FN1  | 3930 | 4005 | 2.39944807831    |
| NM_002026 | FN1  | 7297 | 7328 | -0.01576317129   |
| NM_002026 | FN1  | 4442 | 4510 | 0.395430478134   |
| NM_002026 | FN1  | 3202 | 3266 | 2.20680300036    |
| NM_002026 | FN1  | 7720 | 7772 | -0.684691131077  |
| NM_002026 | FN1  | 5545 | 5572 | -0.600725672011  |
| NM_002026 | FN1  | 3795 | 3846 | 1.56937307975    |
| NM_002026 | FN1  | 5643 | 5714 | 2.20680300036    |
| NM_002026 | FN1  | 5171 | 5208 | 1.98441034311    |
| NM_002026 | FN1  | 4652 | 4680 | 1.39944134725    |
| NM_002026 | FN1  | 2191 | 2244 | 0.984410579028   |
| NM_002026 | FN1  | 3284 | 3381 | 2.79176550109    |
| NM_002026 | FN1  | 6393 | 6429 | 0.721376173188   |
| NM_002026 | FN1  | 1040 | 1154 | 3.25742907343    |
| NM_002026 | FN1  | 2079 | 2159 | 2.48691091956    |
| NM_002026 | FN1  | 2467 | 2542 | 2.85887969694    |
| NM_002026 | FN1  | 2899 | 2976 | 2.09988779645    |
| NM_002026 | FN1  | 2334 | 2467 | 3.15433558047    |
| NM_002026 | FN1  | 6917 | 7050 | 3.20680300036    |
| NM_002026 | FN1  | 1358 | 1384 | 0.399447842388   |
| NM_002026 | FN1  | 6805 | 6901 | 3.30633867392    |
| NM_002026 | FN1  | 6140 | 6178 | 1.39944807808    |
| NM_002026 | FN1  | 5881 | 5980 | 3.09988779645    |
| NM_002026 | FN1  | 4226 | 4295 | 0.721202422876   |
| NM_002026 | FN1  | 1291 | 1340 | 1.3994480783     |
| NM_002026 | FN1  | 1589 | 1698 | 1.72137617319    |
| NM_002026 | FN1  | 6326 | 6359 | -0.0997286303559 |
| NM_002026 | FN1  | 3633 | 3718 | 3.30633867392    |
| NM_002026 | FN1  | 3134 | 3184 | 0.984410578806   |
| NM_002026 | FN1  | 6677 | 6716 | 0.399274327989   |
| NM_002026 | FN1  | 4013 | 4100 | 1.98441057903    |
| NM_002026 | FN1  | 6577 | 6670 | 1.98441057903    |
| NM_002026 | FN1  | 6716 | 6803 | 3.68485029717    |
| NM_002026 | FN1  | 1862 | 2012 | 3.68485029717    |
| NM_002026 | FN1  | 2637 | 2772 | 3.75700008292    |
| NM_002026 | FN1  | 1189 | 1285 | 2.20680300036    |

|              |           |       |       |                    |
|--------------|-----------|-------|-------|--------------------|
| NM_002026    | FN1       | 3881  | 3930  | 0.315308868923     |
| NM_002026    | FN1       | 7     | 137   | 2.30633867392      |
| NM_002026    | FN1       | 6479  | 6571  | 2.30633867392      |
| NM_002026    | FN1       | 5078  | 5169  | 2.92301003436      |
| NM_002026    | FN1       | 708   | 1039  | 5.6940688272       |
| NM_002026    | FN1       | 4871  | 4962  | 1.98441057903      |
| NM_002026    | FN1       | 2994  | 3111  | 3.30633867392      |
| NM_002026    | FN1       | 3495  | 3615  | 2.30633867392      |
| NM_002026    | FN1       | 423   | 566   | 3.04330426808      |
| NM_002026    | FN1       | 7054  | 7190  | 2.20680300036      |
| NM_002026    | FN1       | 1703  | 1834  | 3.25742907343      |
| NM_002026    | FN1       | 1391  | 1505  | 3.20680300036      |
| NM_007033    | RER1      | 569   | 611   | 8.6963640298       |
| NM_031308    | EPPK1     | 6320  | 6371  | 12.2773636652      |
| NM_031308    | EPPK1     | 5891  | 5948  | 11.515326301       |
| NM_031308    | EPPK1     | 14688 | 14737 | 9.27736366519      |
| NM_031308    | EPPK1     | 9885  | 9934  | 10.2773636652      |
| NM_031307    | PUS3      | 20    | 42    | 5.94982372884      |
| NM_024490    | ATP10A    | 3794  | 3813  | 10.1745716469      |
| NM_024496    | IRF2BPL   | 2493  | 2517  | 9.49896186462      |
| NM_001136049 | LMLN      | 2925  | 2965  | 11.8675178563      |
| NM_003482    | MLL2      | 6641  | 6662  | 8.41810241695      |
| NM_003486    | SLC7A5    | 4413  | 4454  | 7.61585207498      |
| NM_207371    | C10orf140 |       | 3158  | 3210 14.0277451479 |
| NM_014602    | PIK3R4    | 4504  | 4523  | 7.51754815868      |
| NM_001135821 | FDPS      | 782   | 847   | 4.23627336696      |
| NM_005885    | MARCH6    | 2690  | 2752  | 7.95083375824      |
| NM_005885    | MARCH6    | 2395  | 2461  | 7.95083375846      |
| NM_005885    | MARCH6    | 1691  | 1748  | 8.14347860048      |
| NM_005885    | MARCH6    | 938   | 999   | 6.64430212774      |
| NM_005885    | MARCH6    | 689   | 732   | 6.72826758681      |
| NM_005885    | MARCH6    | 603   | 644   | 7.14330508608      |
| NM_005885    | MARCH6    | 1551  | 1607  | 6.64430212774      |
| NM_005885    | MARCH6    | 1050  | 1138  | 8.72844133712      |
| NM_005885    | MARCH6    | 2277  | 2361  | 7.72844133712      |
| NM_005885    | MARCH6    | 1379  | 1463  | 6.14347860048      |
| NM_005885    | MARCH6    | 1883  | 1938  | 6.1434788364       |
| NM_003730    | RNASSET2  | 968   | 1018  | 2.79300934042      |
| NM_003730    | RNASSET2  | 560   | 609   | 2.79300934042      |
| NM_001145468 | SPECC1L   | 2063  | 2094  | 4.13274637546      |
| NM_001008800 | CCT3      | 1542  | 1595  | 2.98417121874      |
| NM_005080    | XBP1      | 964   | 1035  | 3.87920772989      |
| NM_005776    | CNIH      | 189   | 225   | 3.41312091463      |
| NM_005776    | CNIH      | 438   | 465   | 2.33299930542      |
| NM_005776    | CNIH      | 365   | 433   | 3.41312091463      |
| NM_005775    | SORBS3    | 709   | 734   | 6.23813954009      |
| NM_001005862 | ERBB2     | 1773  | 1813  | 8.12201169117      |
| NM_001005862 | ERBB2     | 3144  | 3163  | 4.79623974642      |
| NM_001005862 | ERBB2     | 3057  | 3097  | 4.79623974642      |
| NM_001005862 | ERBB2     | 1389  | 1424  | 7.60743851834      |

|              |          |      |      |                   |
|--------------|----------|------|------|-------------------|
| NM_001005862 | ERBB2    | 840  | 866  | 7.11816784131     |
| NM_005779    | LHFPL2   | 35   | 58   | 8.22498610984     |
| NM_005354    | JUND     | 285  | 348  | 7.20570593184     |
| NM_016121    | KCTD3    | 1100 | 1118 | 5.22886718556     |
| NM_016120    | RLIM     | 4528 | 4549 | 7.81599614915     |
| NM_016127    | TMEM66   | 1031 | 1069 | 3.07795166169     |
| NM_016127    | TMEM66   | 673  | 812  | 3.81509099862     |
| NM_016127    | TMEM66   | 533  | 572  | 3.81509100617     |
| NM_016127    | TMEM66   | 1101 | 1137 | 3.811073406       |
| NM_016127    | TMEM66   | 322  | 375  | 3.99398620262     |
| NM_016128    | COPG     | 2341 | 2380 | 3.89955966926     |
| NM_138373    | MYADM    | 965  | 997  | 9.39927325587     |
| NM_138373    | MYADM    | 651  | 714  | 11.068374966      |
| NM_138373    | MYADM    | 799  | 864  | 10.6209159815     |
| NM_138373    | MYADM    | 879  | 942  | 8.74644663517     |
| NM_138373    | MYADM    | 1019 | 1117 | 11.4094118838     |
| NM_138373    | MYADM    | 362  | 432  | 9.74644687109     |
| NM_001251    | CD68     | 1113 | 1161 | 6.74247602742     |
| NM_001251    | CD68     | 836  | 883  | 7.74247602742     |
| NM_001251    | CD68     | 948  | 1024 | 6.74648689653     |
| NM_004599    | SREBF2   | 1763 | 1812 | 7.4329257145      |
| NM_004599    | SREBF2   | 2805 | 2855 | 6.94749888733     |
| NM_004599    | SREBF2   | 2725 | 2763 | 6.21053329317     |
| NM_004599    | SREBF2   | 2249 | 2302 | 6.94767240173     |
| NM_004599    | SREBF2   | 2650 | 2709 | 7.4329257145      |
| NM_001018070 | COR01B   | 1168 | 1218 | 8.47969968486     |
| NM_181575    | AUP1     | 404  | 464  | 6.06507933813     |
| NM_181575    | AUP1     | 815  | 866  | 6.33212461308     |
| NM_181575    | AUP1     | 277  | 339  | 3.74699509309     |
| NM_001163315 | FBXL17   | 1066 | 1097 | 6.44671968868     |
| NM_000611    | CD59     | 367  | 430  | 8.64575345071     |
| NM_000611    | CD59     | 443  | 477  | 6.32381862477     |
| NM_004911    | PDIA4    | 817  | 861  | 5.57726687098     |
| NM_004911    | PDIA4    | 2126 | 2171 | 5.46178965356     |
| NM_004911    | PDIA4    | 664  | 810  | 5.57726687098     |
| NM_004911    | PDIA4    | 1534 | 1570 | 6.19875524773     |
| NM_004911    | PDIA4    | 891  | 924  | 3.46178965356     |
| NM_004911    | PDIA4    | 1021 | 1083 | 4.87682715283     |
| NM_004911    | PDIA4    | 396  | 518  | 5.57726687098     |
| NM_004911    | PDIA4    | 1851 | 1902 | 4.1987552475      |
| NM_004911    | PDIA4    | 1598 | 1698 | 6.12475466628     |
| NM_004911    | PDIA4    | 1099 | 1230 | 5.78371774845     |
| NM_004911    | PDIA4    | 2174 | 2250 | 4.19473764755     |
| NM_004911    | PDIA4    | 1369 | 1472 | 4.87682715284     |
| NM_004911    | PDIA4    | 1716 | 1787 | 4.46178965356     |
| NM_001017423 | ALDH18A1 |      | 1643 | 1707 5.4394673154 |
| NM_003038    | SLC1A4   | 777  | 824  | 9.1246762632      |
| NM_003038    | SLC1A4   | 1460 | 1520 | 8.53971376247     |
| NM_003038    | SLC1A4   | 1040 | 1108 | 8.53971376226     |
| NM_003038    | SLC1A4   | 1594 | 1690 | 10.5397137625     |

|              |          |      |      |               |                |
|--------------|----------|------|------|---------------|----------------|
| NM_003038    | SLC1A4   | 886  | 988  | 8.53971376248 |                |
| NM_003032    | ST6GAL1  | 832  | 940  | 6.08113769891 |                |
| NM_003032    | ST6GAL1  | 991  | 1032 | 5.85874504166 |                |
| NM_003032    | ST6GAL1  | 3846 | 3891 | 5.59169327157 |                |
| NM_003032    | ST6GAL1  | 590  | 673  | 6.4437077783  |                |
| NM_003032    | ST6GAL1  | 1297 | 1378 | 6.08113769891 |                |
| NM_013382    | POMT2    | 4687 | 4727 | 10.6298920749 |                |
| NM_002342    | LTBR     | 748  | 800  | 5.88469056737 |                |
| NM_002615    | SERPINF1 |      | 1045 | 1095          | 3.98328825233  |
| NM_002615    | SERPINF1 |      | 456  | 500           | 5.36179987558  |
| NM_002615    | SERPINF1 |      | 1204 | 1295          | 4.4687150795   |
| NM_002615    | SERPINF1 |      | 769  | 825           | 2.65734255726  |
| NM_002615    | SERPINF1 |      | 72   | 139           | 2.9832882521   |
| NM_002615    | SERPINF1 |      | 512  | 602           | 5.18492211349  |
| NM_002615    | SERPINF1 |      | 1365 | 1407          | 3.46854132918  |
| NM_002615    | SERPINF1 |      | 612  | 668           | 2.24230505799  |
| NM_002615    | SERPINF1 |      | 988  | 1020          | 0.657342557265 |
| NM_002615    | SERPINF1 |      | 836  | 948           | 4.36179987558  |
| NM_002615    | SERPINF1 |      | 321  | 411           | 4.36179987558  |
| NM_024531    | GPR172A  | 398  | 477  | 11.2374583647 |                |
| NM_024531    | GPR172A  | 1383 | 1457 | 10.8224208656 |                |
| NM_024531    | GPR172A  | 1292 | 1345 | 10.237458129  |                |
| NM_024531    | GPR172A  | 1562 | 1641 | 9.82242062968 |                |
| NM_001130929 | C7orf73  | 179  | 255  | 7.79702424619 |                |
| NM_001171812 | GBA      | 1406 | 1482 | 12.0303536816 |                |
| NM_001171812 | GBA      | 767  | 799  | 12.3482641764 |                |
| NM_001171812 | GBA      | 408  | 443  | 9.94621447226 |                |
| NM_001171812 | GBA      | 1250 | 1317 | 11.3522817765 |                |
| NM_001171812 | GBA      | 1062 | 1088 | 10.0263360815 |                |
| NM_001171812 | GBA      | 316  | 377  | 10.0263360815 |                |
| NM_001171812 | GBA      | 1135 | 1221 | 11.8377086037 |                |
| NM_001171812 | GBA      | 1002 | 1045 | 11.3482641764 |                |
| NM_001171812 | GBA      | 1484 | 1589 | 12.6153161824 |                |
| NM_001171812 | GBA      | 831  | 958  | 12.2002786831 |                |
| NM_003255    | TIMP2    | 420  | 475  | 5.08568474752 |                |
| NM_003255    | TIMP2    | 764  | 855  | 5.34889290367 |                |
| NM_003255    | TIMP2    | 585  | 619  | 2.67979119357 |                |
| NM_032797    | AIFM2    | 213  | 255  | 7.13263749207 |                |
| NM_005347    | HSPA5    | 1426 | 1519 | 5.85979398465 |                |
| NM_005347    | HSPA5    | 1681 | 1747 | 5.61878588514 |                |
| NM_005347    | HSPA5    | 465  | 500  | 2.96670895264 |                |
| NM_005347    | HSPA5    | 1326 | 1385 | 4.61878588514 |                |
| NM_005347    | HSPA5    | 808  | 854  | 4.1593542665  |                |
| NM_005347    | HSPA5    | 103  | 155  | 3.15934753545 |                |
| NM_005347    | HSPA5    | 1528 | 1580 | 3.48128236139 |                |
| NM_005347    | HSPA5    | 1189 | 1323 | 5.94071398003 |                |
| NM_005347    | HSPA5    | 295  | 419  | 5.28863728345 |                |
| NM_005347    | HSPA5    | 157  | 295  | 4.61878588514 |                |
| NM_005347    | HSPA5    | 1646 | 1679 | 2.15533666633 |                |
| NM_005347    | HSPA5    | 1760 | 1929 | 5.24681710776 |                |

|              |          |      |      |                |               |
|--------------|----------|------|------|----------------|---------------|
| NM_005347    | HSPA5    | 2150 | 2301 | 3.61878588514  |               |
| NM_005347    | HSPA5    | 523  | 593  | 2.744316767    |               |
| NM_005347    | HSPA5    | 654  | 705  | 4.1593542665   |               |
| NM_005347    | HSPA5    | 1960 | 2146 | 5.48128236139  |               |
| NM_005347    | HSPA5    | 728  | 795  | 1.15533666633  |               |
| NM_005347    | HSPA5    | 879  | 1145 | 6.61878588514  |               |
| NM_005346    | HSPA1B   | 1378 | 1432 | 3.04939969768  |               |
| NM_005345    | HSPA1A   | 1405 | 1459 | 4.2473390753   |               |
| NM_001005476 | PKP4     | 2456 | 2478 | 3.90310310514  |               |
| NM_005340    | HINT1    | 386  | 426  | 4.08398647961  |               |
| NM_180991    | SLC04C1  | 1751 | 1774 | 9.93267414243  |               |
| NM_182507    | KRT80    | 1194 | 1232 | 6.52891291978  |               |
| NM_001063    | TF       | 2498 | 2557 | 0.54566184257  |               |
| NM_001063    | TF       | 2185 | 2296 | 3.28262743674  |               |
| NM_001063    | TF       | 440  | 497  | 0.183091762963 |               |
| NM_001063    | TF       | 262  | 431  | 3.28262743674  |               |
| NM_001063    | TF       | 2306 | 2494 | 3.0481621831   |               |
| NM_001063    | TF       | 1372 | 1598 | 4.06223736831  |               |
| NM_001063    | TF       | 722  | 807  | 1.89929879719  |               |
| NM_001063    | TF       | 1206 | 1349 | 2.69766493602  |               |
| NM_001063    | TF       | 1604 | 2152 | 5.19591580354  |               |
| NM_001063    | TF       | 512  | 717  | 3.50501985807  |               |
| NM_001063    | TF       | 817  | 1198 | 5.28862617736  |               |
| NM_022371    | TOR3A    | 519  | 558  | 9.35502242094  |               |
| NM_022371    | TOR3A    | 690  | 733  | 8.27105696187  |               |
| NM_022371    | TOR3A    | 352  | 397  | 6.27105696187  |               |
| NM_001173425 | DFNB31   | 727  | 748  | 9.38145973562  |               |
| NM_000447    | PSEN2    | 1215 | 1268 | 10.7104858953  |               |
| NM_006876    | B3GNT1   | 832  | 880  | 7.11806110144  |               |
| NM_004583    | RAB5C    | 227  | 267  | 4.05128247291  |               |
| NM_020154    | C15orf24 |      | 174  | 218            | 5.31070948873 |
| NM_020154    | C15orf24 |      | 386  | 440            | 5.8956787205  |
| NM_020154    | C15orf24 |      | 463  | 510            | 4.64161450968 |
| NM_001135602 | GLB1     | 1127 | 1200 | 7.49838397763  |               |
| NM_001135602 | GLB1     | 1605 | 1654 | 6.76141837591  |               |
| NM_001135602 | GLB1     | 1236 | 1285 | 8.17645588274  |               |
| NM_001135602 | GLB1     | 962  | 1018 | 7.17628213242  |               |
| NM_001135602 | GLB1     | 1356 | 1419 | 6.67727917408  |               |
| NM_001135602 | GLB1     | 497  | 549  | 7.17628213242  |               |
| NM_001199693 | SLC4A2   | 2640 | 2667 | 9.79530870138  |               |
| NM_001199693 | SLC4A2   | 2442 | 2482 | 9.978221498    |               |
| NM_001199693 | SLC4A2   | 383  | 428  | 9.05834310721  |               |
| NM_001199693 | SLC4A2   | 1075 | 1134 | 8.47739147561  |               |
| NM_001199693 | SLC4A2   | 3198 | 3268 | 11.0623607074  |               |
| NM_001199693 | SLC4A2   | 2240 | 2347 | 9.06236070738  |               |
| NM_001199693 | SLC4A2   | 3700 | 3767 | 10.2847463977  |               |
| NM_001199693 | SLC4A2   | 2904 | 2980 | 9.06236070738  |               |
| NM_001199693 | SLC4A2   | 2367 | 2430 | 7.39325899728  |               |
| NM_016243    | CYB5R1   | 776  | 880  | 9.77145505038  |               |
| NM_016243    | CYB5R1   | 205  | 268  | 10.619451721   |               |



|           |          |      |      |                   |
|-----------|----------|------|------|-------------------|
| NM_016240 | SCARA3   | 1271 | 1289 | 7.06482594041     |
| NM_016245 | HSD17B11 |      | 246  | 302 3.62940505231 |
| NM_016245 | HSD17B11 |      | 665  | 710 2.89244618165 |
| NM_016245 | HSD17B11 |      | 358  | 402 3.89244618898 |
| NM_016245 | HSD17B11 |      | 628  | 661 3.30346608831 |
| NM_016245 | HSD17B11 |      | 731  | 783 3.62941178336 |
| NM_016245 | HSD17B11 |      | 923  | 995 4.47740868992 |
| NM_016245 | HSD17B11 |      | 436  | 531 4.8924461892  |
| NM_007231 | SLC6A14  | 1590 | 1642 | 11.3289932902     |
| NM_007231 | SLC6A14  | 1650 | 1723 | 12.9810699868     |
| NM_007231 | SLC6A14  | 258  | 310  | 10.5216316371     |
| NM_007231 | SLC6A14  | 219  | 242  | 10.0224616595     |
| NM_007231 | SLC6A14  | 951  | 1009 | 11.9810699865     |
| NM_007231 | SLC6A14  | 1460 | 1585 | 13.3796193633     |
| NM_007231 | SLC6A14  | 780  | 875  | 12.7695658816     |
| NM_007231 | SLC6A14  | 1806 | 1850 | 10.1064271185     |
| NM_007231 | SLC6A14  | 1102 | 1183 | 12.1066008688     |
| NM_000917 | P4HA1    | 724  | 764  | 1.488683695       |
| NM_003934 | FUBP3    | 57   | 106  | 5.79726789991     |
| NM_001336 | CTSZ     | 595  | 638  | 10.7618106203     |
| NM_001336 | CTSZ     | 53   | 91   | 12.7619843706     |
| NM_001336 | CTSZ     | 773  | 808  | 9.76197763953     |
| NM_001336 | CTSZ     | 878  | 962  | 13.8494472118     |
| NM_001336 | CTSZ     | 483  | 594  | 13.2214159892     |
| NM_001336 | CTSZ     | 171  | 236  | 11.9997732561     |
| NM_003036 | SKI      | 592  | 647  | 10.7312305951     |
| NM_003036 | SKI      | 316  | 443  | 9.73524818771     |
| NM_007051 | FAF1     | 342  | 384  | 7.4877552063      |
| NM_024715 | TXNDC15  | 1045 | 1071 | 7.07574352118     |
| NM_006184 | NUCB1    | 869  | 957  | 7.21116538361     |
| NM_006184 | NUCB1    | 626  | 678  | 5.1236958113      |
| NM_006184 | NUCB1    | 1900 | 1947 | 6.70866504308     |
| NM_006184 | NUCB1    | 533  | 613  | 5.70866504308     |
| NM_006184 | NUCB1    | 679  | 768  | 6.2936275438      |
| NM_006184 | NUCB1    | 2481 | 2547 | 5.44563063725     |
| NM_006184 | NUCB1    | 1101 | 1289 | 7.44563063725     |
| NM_006184 | NUCB1    | 367  | 439  | 5.44563063702     |
| NM_006184 | NUCB1    | 985  | 1066 | 7.2936275438      |
| NM_006184 | NUCB1    | 439  | 531  | 5.12370254236     |
| NM_007270 | FKBP9    | 3385 | 3425 | 6.04712347154     |
| NM_007270 | FKBP9    | 1358 | 1399 | 7.71621845059     |
| NM_007270 | FKBP9    | 1200 | 1252 | 7.45319077581     |
| NM_007270 | FKBP9    | 1460 | 1522 | 6.71220758147     |
| NM_007270 | FKBP9    | 960  | 1007 | 7.93844385266     |
| NM_007270 | FKBP9    | 747  | 824  | 7.93861087193     |
| NM_014668 | GREB1    | 6227 | 6247 | 7.72059553289     |
| NM_005570 | LMAN1    | 988  | 1034 | 5.23844470631     |
| NM_005570 | LMAN1    | 809  | 855  | 5.23844470631     |
| NM_005570 | LMAN1    | 866  | 920  | 4.5014791046      |
| NM_005570 | LMAN1    | 299  | 402  | 6.23844470631     |

|              |               |       |       |                   |
|--------------|---------------|-------|-------|-------------------|
| NM_005570    | LMAN1         | 404   | 497   | 5.50147911215     |
| NM_005570    | LMAN1         | 1190  | 1306  | 6.5603728012      |
| NM_005572    | LMNA          | 1879  | 1917  | 4.50597993479     |
| NM_014663    | KDM4A         | 2666  | 2686  | 6.61745566349     |
| NM_001203261 | NDUFC2-KCTD14 |       | 681   | 744 5.35292428131 |
| NM_152637    | METTTL7B      | 829   | 858   | 11.2981365359     |
| NM_152637    | METTTL7B      | 564   | 688   | 12.8832727869     |
| NM_032631    | HDGFRP2       | 1265  | 1294  | 7.22451706835     |
| NM_001077238 | SPPL2B        | 1530  | 1592  | 9.12601861663     |
| NM_033505    | EPT1          | 822   | 851   | 8.15088170416     |
| NM_033505    | EPT1          | 1102  | 1134  | 7.73200035502     |
| NM_033505    | EPT1          | 727   | 778   | 6.15105545447     |
| NM_015284    | SZT2          | 13566 | 13602 | 10.7918115203     |
| NM_015283    | DPY19L1       | 534   | 573   | 7.48852371007     |
| NM_002408    | MGAT2         | 182   | 233   | 8.73294061532     |
| NM_001040125 | PQLC2         | 923   | 983   | 12.236137664      |
| NM_001242903 | AKAP1         | 2096  | 2141  | 4.37394840457     |
| NM_001242903 | AKAP1         | 1145  | 1214  | 6.0390325145      |
| NM_001277    | CHKA          | 2212  | 2291  | 5.37905306449     |
| NM_001277    | CHKA          | 1443  | 1545  | 7.96000469609     |
| NM_001018054 | LRP8          | 100   | 140   | 8.36725578125     |
| NM_001018056 | VLDLR         | 541   | 598   | 6.56000228118     |
| NM_001018056 | VLDLR         | 350   | 378   | 6.56401988135     |
| NM_000584    | IL8           | 291   | 339   | 12.1319587245     |
| NM_000584    | IL8           | 356   | 443   | 13.0250435206     |
| NM_001185    | AZGP1         | 293   | 369   | 0.899718983792    |
| NM_001185    | AZGP1         | 95    | 139   | 4.07366158541     |
| NM_001185    | AZGP1         | 162   | 221   | 2.48852533437     |
| NM_001183    | ATP6AP1       | 449   | 497   | 7.39420149251     |
| NM_001183    | ATP6AP1       | 210   | 249   | 7.61659368547     |
| NM_001183    | ATP6AP1       | 253   | 292   | 7.31006229067     |
| NM_001183    | ATP6AP1       | 340   | 391   | 7.39018389988     |
| NM_001183    | ATP6AP1       | 1276  | 1363  | 8.61659392139     |
| NM_001183    | ATP6AP1       | 884   | 1015  | 9.39420150006     |
| NM_001143883 | PPIAL4B       | 532   | 561   | 5.96133276824     |
| NM_001982    | ERBB3         | 865   | 908   | 4.94655122546     |
| NM_001982    | ERBB3         | 747   | 813   | 5.29371810963     |
| NM_001982    | ERBB3         | 2499  | 2529  | 3.70876210404     |
| NM_001982    | ERBB3         | 2416  | 2493  | 5.70876210404     |
| NM_001174072 | SERINC5       | 1044  | 1085  | 7.683948855       |
| NM_001174072 | SERINC5       | 675   | 721   | 8.35287681479     |
| NM_001174072 | SERINC5       | 1328  | 1383  | 8.34903296493     |
| NM_017455    | NPTN          | 285   | 327   | 5.11163411493     |
| NM_017455    | NPTN          | 738   | 792   | 5.96364862165     |
| NM_017455    | NPTN          | 853   | 915   | 6.60107853472     |
| NM_017455    | NPTN          | 675   | 726   | 4.79371688916     |
| NM_017905    | TMC03         | 1618  | 1652  | 6.64333031482     |
| NM_017905    | TMC03         | 1896  | 1956  | 6.64350406492     |
| NM_017905    | TMC03         | 573   | 619   | 6.41709404363     |
| NM_017905    | TMC03         | 284   | 363   | 6.42111163625     |

|              |          |      |      |                    |
|--------------|----------|------|------|--------------------|
| NM_004930    | CAPZB    | 60   | 82   | 3.51751299117      |
| NM_006912    | RIT1     | 1832 | 1867 | 5.23085045435      |
| NM_184043    | ALDOA    | 597  | 656  | 1.15986692895      |
| NM_184043    | ALDOA    | 660  | 705  | 1.1638842932       |
| NM_184043    | ALDOA    | 283  | 355  | 0.426918934953     |
| NM_184043    | ALDOA    | 787  | 857  | 1.84194970318      |
| NM_184043    | ALDOA    | 381  | 471  | 1.1638845289       |
| NM_000638    | VTN      | 670  | 733  | 7.09552079833      |
| NM_000638    | VTN      | 1147 | 1190 | 5.51055156656      |
| NM_000638    | VTN      | 1304 | 1444 | 8.96998991625      |
| NM_000638    | VTN      | 334  | 529  | 7.43655771617      |
| NM_000638    | VTN      | 1490 | 1569 | 5.77359270345      |
| NM_000638    | VTN      | 784  | 926  | 8.04661119785      |
| NM_000638    | VTN      | 1016 | 1133 | 7.43655771617      |
| NM_000638    | VTN      | 1576 | 1644 | 4.77359270344      |
| NM_000636    | SOD2     | 763  | 830  | 5.40959046521      |
| NM_000636    | SOD2     | 516  | 576  | 4.48971207442      |
| NM_139177    | SLC39A11 |      | 1074 | 1142 7.70720955551 |
| NM_025130    | HKDC1    | 2103 | 2149 | 8.80912790498      |
| NM_025130    | HKDC1    | 1848 | 1912 | 9.62050042721      |
| NM_025130    | HKDC1    | 658  | 711  | 9.13105599987      |
| NM_025130    | HKDC1    | 1250 | 1294 | 9.13489984972      |
| NM_001123068 | PPIAL4G  | 490  | 517  | 5.52138980358      |
| NM_001123068 | PPIAL4G  | 367  | 400  | 5.44126819437      |
| NM_001079841 | OCIAD1   | 546  | 595  | 8.827309271        |
| NM_001079841 | OCIAD1   | 711  | 753  | 7.74930675899      |
| NM_016442    | ERAP1    | 994  | 1046 | 7.04654240942      |
| NM_016442    | ERAP1    | 1757 | 1797 | 6.45756230853      |
| NM_002184    | IL6ST    | 703  | 756  | 5.11237485395      |
| NM_002184    | IL6ST    | 1143 | 1193 | 6.43430294884      |
| NM_002184    | IL6ST    | 1196 | 1262 | 6.11639244657      |
| NM_002360    | MAFK     | 700  | 733  | 6.58480141609      |
| NM_033200    | LMF2     | 401  | 432  | 7.9390685578       |
| NM_033200    | LMF2     | 1529 | 1566 | 9.60415266773      |
| NM_033200    | LMF2     | 731  | 771  | 10.3451358618      |
| NM_033200    | LMF2     | 1212 | 1278 | 12.1106706084      |
| NM_033200    | LMF2     | 1402 | 1437 | 9.02303401687      |
| NM_033200    | LMF2     | 965  | 1032 | 10.6081702679      |
| NM_033200    | LMF2     | 1444 | 1517 | 10.0232075313      |
| NM_021937    | EEFSEC   | 1122 | 1141 | 6.7274027177       |
| NM_014838    | ZBED4    | 13   | 34   | 6.70981235042      |
| NM_005321    | HIST1H1E |      | 57   | 90 12.9461460102   |
| NM_001046    | SLC12A2  | 3094 | 3143 | 11.1977278309      |
| NM_001046    | SLC12A2  | 1307 | 1341 | 12.5602981462      |
| NM_001046    | SLC12A2  | 2819 | 2880 | 11.3903731445      |
| NM_001046    | SLC12A2  | 2599 | 2655 | 12.5602981462      |
| NM_001046    | SLC12A2  | 2538 | 2597 | 11.3903731372      |
| NM_001046    | SLC12A2  | 1491 | 1548 | 9.97516189517      |
| NM_001046    | SLC12A2  | 1409 | 1482 | 11.3903731448      |
| NM_001046    | SLC12A2  | 57   | 112  | 11.3903731445      |

|              |          |      |      |                   |
|--------------|----------|------|------|-------------------|
| NM_001046    | SLC12A2  | 1622 | 1691 | 11.7123012397     |
| NM_001046    | SLC12A2  | 2338 | 2410 | 11.8498047634     |
| NM_001046    | SLC12A2  | 1566 | 1621 | 11.5602981462     |
| NM_001046    | SLC12A2  | 1058 | 1131 | 11.8498047634     |
| NM_001046    | SLC12A2  | 581  | 618  | 11.3903731372     |
| NM_001046    | SLC12A2  | 3395 | 3421 | 8.39019939445     |
| NM_001046    | SLC12A2  | 2905 | 2969 | 10.9753356455     |
| NM_001046    | SLC12A2  | 3231 | 3268 | 8.39036641372     |
| NM_001046    | SLC12A2  | 1757 | 1825 | 10.7123012397     |
| NM_001046    | SLC12A2  | 799  | 848  | 11.5602981462     |
| NM_001046    | SLC12A2  | 3010 | 3062 | 10.3903729089     |
| NM_001046    | SLC12A2  | 3274 | 3330 | 10.3903731448     |
| NM_001046    | SLC12A2  | 2732 | 2805 | 11.7123012397     |
| NM_001046    | SLC12A2  | 636  | 702  | 10.9753356455     |
| NM_001046    | SLC12A2  | 1184 | 1267 | 11.1977280668     |
| NM_001046    | SLC12A2  | 2425 | 2514 | 12.1977280668     |
| NM_001046    | SLC12A2  | 3538 | 3613 | 9.39037290885     |
| NM_001046    | SLC12A2  | 887  | 1051 | 12.5602981462     |
| NM_001046    | SLC12A2  | 422  | 498  | 10.3903731448     |
| NM_005036    | PPARA    | 7964 | 7985 | 7.63464000982     |
| NM_001518    | GTF2I    | 1770 | 1808 | 2.91981299525     |
| NM_004039    | ANXA2    | 595  | 660  | 3.89755315881     |
| NM_004039    | ANXA2    | 499  | 586  | 4.77202228428     |
| NM_022356    | LEPRE1   | 693  | 762  | 8.38600434709     |
| NM_016086    | STYXL1   | 241  | 263  | 9.0717624378      |
| NM_001901    | CTGF     | 432  | 494  | 4.6276064506      |
| NM_001901    | CTGF     | 611  | 649  | 2.73611231916     |
| NM_001901    | CTGF     | 750  | 774  | 1.81623392837     |
| NM_001901    | CTGF     | 1154 | 1223 | 5.9077143698      |
| NM_198181    | GOLGA6L9 |      | 118  | 138 5.86880358772 |
| NM_000935    | PLOD2    | 2340 | 2374 | 4.15319540889     |
| NM_000935    | PLOD2    | 2432 | 2467 | 2.98309689305     |
| NM_000935    | PLOD2    | 1334 | 1384 | 2.98327040745     |
| NM_000935    | PLOD2    | 1760 | 1850 | 4.30519873825     |
| NM_007214    | SEC63    | 880  | 912  | 4.62832905902     |
| NM_007214    | SEC63    | 1563 | 1595 | 2.54820744981     |
| NM_007214    | SEC63    | 1007 | 1053 | 5.13316995053     |
| NM_007214    | SEC63    | 1785 | 1840 | 4.217308924       |
| NM_000938    | POLR2B   | 2733 | 2763 | 5.45738645976     |
| NM_001410    | MEGF8    | 1644 | 1699 | 10.2554754792     |
| NM_001160125 | KLF6     | 2006 | 2024 | 6.1722930904      |
| NM_148886    | SMCR7    | 681  | 701  | 10.374775832      |
| NM_005742    | PDIA6    | 1402 | 1471 | 2.50693555862     |
| NM_005742    | PDIA6    | 488  | 582  | 3.50693555862     |
| NM_005742    | PDIA6    | 1124 | 1208 | 3.33701055718     |
| NM_005742    | PDIA6    | 1704 | 1759 | 0.921966326846    |
| NM_005742    | PDIA6    | 85   | 237  | 2.9219730579      |
| NM_005742    | PDIA6    | 601  | 815  | 4.54646392281     |
| NM_005742    | PDIA6    | 1270 | 1349 | 0.921973057893    |
| NM_005742    | PDIA6    | 868  | 1107 | 5.50693555862     |

|              |          |      |      |      |                  |
|--------------|----------|------|------|------|------------------|
| NM_001164665 | KIAA1549 |      | 6264 | 6283 | 11.531176973     |
| NM_005744    | ARIH1    | 541  | 580  |      | 5.76169994615    |
| NM_182776    | MCM7     | 2236 | 2286 |      | 4.53330816365    |
| NM_005516    | HLA-E    | 747  | 785  |      | 6.68250297004    |
| NM_005516    | HLA-E    | 788  | 945  |      | 7.46011078462    |
| NM_005516    | HLA-E    | 1032 | 1140 |      | 8.04507328534    |
| NM_005516    | HLA-E    | 567  | 619  |      | 5.87514804798    |
| NM_005514    | HLA-B    | 1101 | 1141 |      | 6.3533681986     |
| NM_005514    | HLA-B    | 418  | 462  |      | 5.54601327655    |
| NM_005514    | HLA-B    | 1010 | 1061 |      | 6.13097577727    |
| NM_005514    | HLA-B    | 478  | 556  |      | 6.13097577727    |
| NM_005514    | HLA-B    | 778  | 832  |      | 4.54601327633    |
| NM_005514    | HLA-B    | 616  | 654  |      | 3.546013269      |
| NM_005514    | HLA-B    | 338  | 376  |      | 3.54583952623    |
| NM_005514    | HLA-B    | 192  | 228  |      | 4.46187406716    |
| NM_005514    | HLA-B    | 273  | 321  |      | 4.54199567637    |
| NM_001185076 | FMR1     | 97   | 164  |      | 4.30493783822    |
| NM_001185073 | CLDN12   | 759  | 806  |      | 9.19396689531    |
| NM_001185073 | CLDN12   | 812  | 862  |      | 9.43176251187    |
| NM_001185073 | CLDN12   | 622  | 694  |      | 10.1939733904    |
| NM_001185073 | CLDN12   | 524  | 561  |      | 7.10983441698    |
| NM_001037637 | BTF3     | 165  | 186  |      | -0.0288546390345 |
| NM_002791    | PSMA6    | 282  | 311  |      | 2.62786378431    |
| NM_002793    | PSMB1    | 736  | 779  |      | 3.74667267154    |
| NM_002792    | PSMA7    | 289  | 367  |      | 4.20069044508    |
| NM_015510    | DHRS7B   | 920  | 975  |      | 9.63648185724    |
| NM_002428    | MMP15    | 599  | 653  |      | 8.74841043824    |
| NM_002428    | MMP15    | 2293 | 2331 |      | 8.01144484408    |
| NM_002428    | MMP15    | 2790 | 2888 |      | 9.31797623888    |
| NM_019616    | F7       | 930  | 979  |      | 7.40666511668    |
| NM_019616    | F7       | 1067 | 1091 |      | 7.41050896654    |
| NM_019616    | F7       | 738  | 797  |      | 7.32654350747    |
| NM_001136196 | TNPO2    | 3016 | 3049 |      | 9.79912982678    |
| NM_138330    | ZNF675   | 371  | 392  |      | 9.44451288645    |
| NM_001216    | CA9      | 1120 | 1178 |      | 6.53000886219    |
| NM_001216    | CA9      | 349  | 405  |      | 7.52599126957    |
| NM_014714    | IFT140   | 4977 | 5012 |      | 9.26921236515    |
| NM_017617    | NOTCH1   | 999  | 1043 |      | 14.5898373431    |
| NM_017617    | NOTCH1   | 4622 | 4690 |      | 16.1749735942    |
| NM_004482    | GALNT3   | 1976 | 2034 |      | 12.6712166141    |
| NM_004482    | GALNT3   | 1368 | 1403 |      | 11.6710430997    |
| NM_004482    | GALNT3   | 863  | 912  |      | 11.6712168424    |
| NM_004482    | GALNT3   | 1571 | 1640 |      | 12.6671992498    |
| NM_004481    | GALNT2   | 2114 | 2164 |      | 5.84442123897    |
| NM_004481    | GALNT2   | 1089 | 1136 |      | 5.42955075895    |
| NM_012201    | GLG1     | 2279 | 2356 |      | 7.05336085486    |
| NM_012201    | GLG1     | 3420 | 3462 |      | 4.7274151598     |
| NM_012201    | GLG1     | 1759 | 1806 |      | 3.7274151598     |
| NM_012201    | GLG1     | 2357 | 2424 |      | 5.31639525314    |
| NM_012201    | GLG1     | 1660 | 1695 |      | 4.31638852964    |

|           |        |      |      |                 |
|-----------|--------|------|------|-----------------|
| NM_012201 | GLG1   | 601  | 641  | 4.31638852964   |
| NM_012201 | GLG1   | 1178 | 1220 | 5.31237766052   |
| NM_012201 | GLG1   | 3387 | 3418 | 3.64729355059   |
| NM_012201 | GLG1   | 2222 | 2266 | 4.73142602892   |
| NM_012201 | GLG1   | 3514 | 3553 | 5.53878767448   |
| NM_012201 | GLG1   | 1335 | 1416 | 5.31639526069   |
| NM_004486 | GOLGA2 | 30   | 50   | 5.83394174415   |
| NM_133450 | ANKS3  | 102  | 123  | 8.91529229457   |
| NM_000039 | APOA1  | 111  | 210  | 0.225898242348  |
| NM_000039 | APOA1  | 327  | 412  | 1.13278883796   |
| NM_000039 | APOA1  | 734  | 813  | 0.395823243791  |
| NM_000039 | APOA1  | 231  | 277  | -1.18914598798  |
| NM_000039 | APOA1  | 426  | 461  | 0.0332531568567 |
| NM_000039 | APOA1  | 504  | 557  | -1.77410848871  |
| NM_182715 | SYPL1  | 483  | 521  | 7.84353421079   |
| NM_182715 | SYPL1  | 673  | 736  | 9.16947990585   |
| NM_182715 | SYPL1  | 599  | 665  | 9.16947990585   |
| NM_182715 | SYPL1  | 138  | 250  | 8.84353421079   |
| NM_003217 | TMBIM6 | 1067 | 1107 | 5.51209745389   |
| NM_003217 | TMBIM6 | 903  | 945  | 5.92730197244   |
| NM_003217 | TMBIM6 | 241  | 272  | 4.92730870349   |
| NM_003217 | TMBIM6 | 1668 | 1732 | 5.42813199483   |
| NM_003217 | TMBIM6 | 286  | 440  | 9.62774842163   |
| NM_003217 | TMBIM6 | 528  | 900  | 10.2671587064   |
| NM_003217 | TMBIM6 | 64   | 149  | 7.8341992991    |
| NM_207520 | RTN4   | 1117 | 1152 | 6.79810555965   |
| NM_207520 | RTN4   | 368  | 479  | 8.9356090834    |
| NM_207520 | RTN4   | 1280 | 1366 | 8.47617746476   |
| NM_207520 | RTN4   | 1379 | 1416 | 7.64610246621   |
| NM_207520 | RTN4   | 1174 | 1228 | 7.9356090834    |
| NM_207520 | RTN4   | 318  | 354  | 5.47215986459   |
| NM_207520 | RTN4   | 1547 | 1600 | 6.47215986459   |
| NM_207520 | RTN4   | 1234 | 1275 | 6.06113323443   |
| NM_207520 | RTN4   | 607  | 678  | 6.79408795948   |
| NM_207520 | RTN4   | 926  | 967  | 6.47617745722   |
| NM_198576 | AGRN   | 4649 | 4700 | 7.24595967211   |
| NM_198576 | AGRN   | 1821 | 1894 | 9.62447153128   |
| NM_198576 | AGRN   | 3872 | 3925 | 8.83092240875   |
| NM_198576 | AGRN   | 2513 | 2593 | 8.62447153128   |
| NM_198576 | AGRN   | 6600 | 6676 | 8.38346343178   |
| NM_198576 | AGRN   | 3746 | 3833 | 8.7313867352    |
| NM_198576 | AGRN   | 3550 | 3615 | 7.50899431386   |
| NM_198576 | AGRN   | 2115 | 2179 | 9.24595990803   |
| NM_198576 | AGRN   | 7227 | 7265 | 4.83989260376   |
| NM_198576 | AGRN   | 460  | 509  | 8.83092240875   |
| NM_198576 | AGRN   | 159  | 204  | 8.24595990803   |
| NM_198576 | AGRN   | 5071 | 5174 | 9.50899431386   |
| NM_198576 | AGRN   | 2051 | 2109 | 8.38346343178   |
| NM_198576 | AGRN   | 980  | 1007 | 8.09395681436   |
| NM_198576 | AGRN   | 1451 | 1540 | 8.38346343178   |

|              |          |      |      |                   |
|--------------|----------|------|------|-------------------|
| NM_198576    | AGRN     | 2846 | 2878 | 6.42485510448     |
| NM_198576    | AGRN     | 1225 | 1301 | 8.24595990802     |
| NM_198576    | AGRN     | 5564 | 5592 | 5.83989260376     |
| NM_198576    | AGRN     | 3366 | 3448 | 7.24595990803     |
| NM_198576    | AGRN     | 2310 | 2377 | 7.50882056354     |
| NM_198576    | AGRN     | 1610 | 1762 | 8.24595990803     |
| NM_198576    | AGRN     | 4970 | 5050 | 7.7313867352      |
| NM_198576    | AGRN     | 3203 | 3302 | 8.38346343178     |
| NM_198576    | AGRN     | 6861 | 6949 | 7.24595990803     |
| NM_198576    | AGRN     | 1121 | 1190 | 9.09395681458     |
| NM_198576    | AGRN     | 6765 | 6848 | 5.92403157722     |
| NM_198576    | AGRN     | 241  | 348  | 9.09395681458     |
| NM_198576    | AGRN     | 4063 | 4104 | 6.92385806282     |
| NM_198576    | AGRN     | 5594 | 5848 | 10.1719593266     |
| NM_198576    | AGRN     | 2738 | 2835 | 7.92403181314     |
| NM_198576    | AGRN     | 2597 | 2721 | 9.56788800292     |
| NM_198576    | AGRN     | 4196 | 4327 | 7.50899431386     |
| NM_198576    | AGRN     | 6000 | 6145 | 8.50899431386     |
| NM_198576    | AGRN     | 2940 | 3033 | 9.17195932658     |
| NM_198576    | AGRN     | 4418 | 4567 | 9.09395681458     |
| NM_022834    | VWA1     | 784  | 825  | 12.0983627552     |
| NM_022834    | VWA1     | 1423 | 1476 | 11.397916306      |
| NM_022834    | VWA1     | 1004 | 1078 | 11.719851132      |
| NM_022834    | VWA1     | 1909 | 1990 | 11.719851132      |
| NM_022834    | VWA1     | 939  | 999  | 9.39792302952     |
| NM_022834    | VWA1     | 657  | 729  | 11.719851132      |
| NM_020470    | YIF1A    | 989  | 1017 | 7.0715406732      |
| NM_020470    | YIF1A    | 833  | 896  | 8.96303480442     |
| NM_020474    | GALNT1   | 905  | 968  | 5.94848972025     |
| NM_020474    | GALNT1   | 1009 | 1047 | 6.94848972025     |
| NM_020474    | GALNT1   | 1189 | 1218 | 7.83997712064     |
| NM_198793    | CD47     | 1086 | 1144 | 11.2592905465     |
| NM_198793    | CD47     | 920  | 967  | 12.2633081467     |
| NM_198793    | CD47     | 678  | 760  | 8.94138005182     |
| NM_001198869 | CAPN1    | 1067 | 1098 | 7.18010663311     |
| NM_013342    | TFPT     | 604  | 626  | 8.27601974878     |
| NM_001199867 | MARK4    | 704  | 731  | 6.66755869049     |
| NM_013346    | SNX12    | 543  | 564  | 6.69148945535     |
| NM_016586    | MBIP     | 41   | 63   | 4.60631710034     |
| NM_001130963 | TMEM194A |      | 604  | 637 9.64066907511 |
| NM_001130963 | TMEM194A |      | 551  | 594 10.0558735937 |
| NM_014580    | SLC2A8   | 431  | 474  | 9.61579866398     |
| NM_014580    | SLC2A8   | 1109 | 1185 | 9.02681857064     |
| NM_014580    | SLC2A8   | 475  | 533  | 9.53165946215     |
| NM_014580    | SLC2A8   | 556  | 662  | 10.0308361708     |
| NM_014585    | SLC40A1  | 14   | 42   | 5.58720041554     |
| NM_014584    | ER01L    | 491  | 532  | 6.32676182659     |
| NM_014584    | ER01L    | 140  | 216  | 5.64868992147     |
| NM_014584    | ER01L    | 1007 | 1065 | 5.32274422641     |
| NM_014584    | ER01L    | 1080 | 1116 | 4.32658807627     |

|              |          |      |      |                   |
|--------------|----------|------|------|-------------------|
| NM_014584    | ER01L    | 608  | 714  | 5.91172432731     |
| NM_014584    | ER01L    | 1342 | 1477 | 7.78619344522     |
| NM_018136    | ASPM     | 3141 | 3193 | 7.92581471797     |
| NM_001115113 | WDR26    | 295  | 355  | 7.25374435107     |
| NM_015374    | SUN2     | 3468 | 3529 | 6.36997534047     |
| NM_015374    | SUN2     | 1391 | 1454 | 7.95493784119     |
| NM_015374    | SUN2     | 2292 | 2337 | 7.02681932542     |
| NM_015374    | SUN2     | 1607 | 1656 | 7.37399270472     |
| NM_015374    | SUN2     | 328  | 393  | 7.59638536197     |
| NM_015374    | SUN2     | 916  | 1017 | 7.37399294064     |
| NM_015374    | SUN2     | 1492 | 1542 | 7.28985373126     |
| NM_015374    | SUN2     | 657  | 740  | 7.5923677618      |
| NM_001167614 | LEMD3    | 1782 | 1830 | 8.58671463619     |
| NM_001167961 | KCTD7    | 1150 | 1170 | 9.18972363285     |
| NM_005224    | ARID3A   | 959  | 1033 | 5.99368019325     |
| NM_203344    | SERTAD3  | 137  | 155  | 11.8059965638     |
| NM_001135770 | PVR      | 972  | 1019 | 9.58390097355     |
| NM_001135770 | PVR      | 877  | 936  | 6.99877145356     |
| NM_001135770 | PVR      | 682  | 716  | 9.72216091655     |
| NM_001135770 | PVR      | 566  | 642  | 8.99894520388     |
| NM_001026    | RPS24    | 407  | 470  | -0.579983195971   |
| NM_001024    | RPS21    | 86   | 128  | 2.05572077684     |
| NM_001025    | RPS23    | 90   | 145  | -1.38794947055    |
| NM_001025    | RPS23    | 339  | 412  | -0.650983876388   |
| NM_001022    | RPS19    | 368  | 430  | 3.35968032945     |
| NM_001022    | RPS19    | 705  | 787  | 2.18975532801     |
| NM_001023    | RPS20    | 284  | 320  | 2.22412613526     |
| NM_001020    | RPS16    | 266  | 291  | 1.37575786619     |
| NM_001020    | RPS16    | 128  | 209  | 3.45989707557     |
| NM_001028    | RPS25    | 6    | 68   | -1.68569589949    |
| NM_001029    | RPS26    | 513  | 557  | 2.85155294623     |
| NM_001029    | RPS26    | 242  | 292  | 3.18262498644     |
| NM_022338    | C11orf24 |      | 1077 | 1125 6.7460633933 |
| NM_022338    | C11orf24 |      | 328  | 397 7.00508019897 |
| NM_001710    | CFB      | 1370 | 1424 | 4.19923292275     |
| NM_001710    | CFB      | 577  | 625  | 4.46210030932     |
| NM_001710    | CFB      | 1047 | 1074 | 2.79317234953     |
| NM_001710    | CFB      | 881  | 922  | 2.877311323       |
| NM_001710    | CFB      | 1971 | 2038 | 6.26962898169     |
| NM_001710    | CFB      | 512  | 576  | 4.87731155869     |
| NM_001710    | CFB      | 1433 | 1465 | 3.46227382372     |
| NM_001710    | CFB      | 2527 | 2600 | 1.79317234953     |
| NM_001710    | CFB      | 643  | 795  | 5.96477440017     |
| NM_001710    | CFB      | 1794 | 1925 | 4.87731155892     |
| NM_016200    | NAA38    | 7084 | 7104 | 5.41501229533     |
| NM_001080975 | REPS2    | 50   | 86   | 12.7292299304     |
| NM_001080975 | REPS2    | 176  | 208  | 11.7290561801     |
| NM_001249    | ENTPD5   | 1308 | 1336 | 4.87753229609     |
| NM_001532    | SLC29A2  | 996  | 1030 | 9.34896025544     |
| NM_001532    | SLC29A2  | 1536 | 1574 | 9.34896025544     |



|              |         |      |      |               |
|--------------|---------|------|------|---------------|
| NM_181701    | QSOX2   | 498  | 565  | 7.39255813581 |
| NM_181701    | QSOX2   | 1070 | 1126 | 7.87781122021 |
| NM_194247    | HNRNPA3 | 405  | 470  | 3.19334427481 |
| NM_020665    | TMEM27  | 574  | 643  | 10.8993439198 |
| NM_020665    | TMEM27  | 782  | 815  | 9.8953263198  |
| NM_024963    | FBXL18  | 7301 | 7337 | 11.8528152602 |
| NM_024743    | UGT2A3  | 755  | 796  | 6.15010895527 |
| NM_024743    | UGT2A3  | 841  | 878  | 3.744041651   |
| NM_024743    | UGT2A3  | 465  | 518  | 5.82818086038 |
| NM_024743    | UGT2A3  | 297  | 330  | 6.28761247902 |
| NM_024743    | UGT2A3  | 1287 | 1345 | 5.63553578243 |
| NM_024743    | UGT2A3  | 527  | 555  | 4.40912576093 |
| NM_024743    | UGT2A3  | 1366 | 1430 | 5.15010222422 |
| NM_024743    | UGT2A3  | 384  | 424  | 5.15010871935 |
| NM_004761    | RGL2    | 218  | 237  | 8.59339321548 |
| NM_173601    | GXYLT1  | 565  | 605  | 8.41753724281 |
| NM_139030    | CD151   | 282  | 339  | 6.9136554197  |
| NM_139030    | CD151   | 733  | 780  | 7.69126323428 |
| NM_139030    | CD151   | 556  | 595  | 6.69126323428 |
| NM_139030    | CD151   | 794  | 857  | 6.69126323428 |
| NM_139030    | CD151   | 635  | 668  | 6.69126323428 |
| NM_139030    | CD151   | 862  | 910  | 5.10228313338 |
| NM_139030    | CD151   | 180  | 221  | 6.9136554197  |
| NM_139030    | CD151   | 416  | 479  | 7.10630073356 |
| NM_139030    | CD151   | 490  | 552  | 6.10630072601 |
| NM_139030    | CD151   | 344  | 404  | 6.42822209739 |
| NM_005534    | IFNGR2  | 390  | 410  | 5.98965412222 |
| NM_005827    | SLC35B1 | 651  | 685  | 6.34319126332 |
| NM_006320    | PGRMC2  | 1545 | 1596 | 5.09206095647 |
| NM_006322    | TUBGCP3 | 2210 | 2230 | 6.27262607684 |
| NM_006325    | RAN     | 97   | 136  | 3.85779766846 |
| NM_003795    | SNX3    | 738  | 760  | 3.31251448728 |
| NM_001142936 | DAGLB   | 249  | 285  | 11.2617392309 |
| NM_001142936 | DAGLB   | 1355 | 1399 | 10.9268233408 |
| NM_001142936 | DAGLB   | 931  | 979  | 10.2617392309 |
| NM_138319    | PCSK6   | 1340 | 1391 | 7.5928428035  |
| NM_138319    | PCSK6   | 189  | 227  | 5.01189790295 |
| NM_004587    | RRBP1   | 2123 | 2161 | 5.09029954835 |
| NM_004587    | RRBP1   | 80   | 118  | 3.58545865684 |
| NM_004587    | RRBP1   | 2415 | 2490 | 3.58545865684 |
| NM_004587    | RRBP1   | 1301 | 1338 | 1.92037454691 |
| NM_004587    | RRBP1   | 1612 | 1657 | 4.32644161526 |
| NM_004587    | RRBP1   | 515  | 607  | 6.39683117907 |
| NM_004587    | RRBP1   | 1474 | 1527 | 5.32644185118 |
| NM_004587    | RRBP1   | 1930 | 2017 | 5.00451375629 |
| NM_004587    | RRBP1   | 3641 | 3686 | 5.17426500742 |
| NM_004587    | RRBP1   | 3057 | 3122 | 5.00451375629 |
| NM_004587    | RRBP1   | 763  | 791  | 3.50533704763 |
| NM_004587    | RRBP1   | 621  | 654  | 3.92037454691 |
| NM_004587    | RRBP1   | 899  | 936  | 2.92037454691 |

|              |         |      |      |                |
|--------------|---------|------|------|----------------|
| NM_004587    | RRBP1   | 296  | 338  | 3.58545865684  |
| NM_004587    | RRBP1   | 2167 | 2269 | 5.70495347444  |
| NM_004587    | RRBP1   | 681  | 762  | 6.25244126974  |
| NM_004587    | RRBP1   | 1204 | 1260 | 3.58946952596  |
| NM_004587    | RRBP1   | 2496 | 2594 | 5.70495347443  |
| NM_001207066 | CXADR   | 663  | 699  | 7.04268383859  |
| NM_001207066 | CXADR   | 831  | 913  | 7.45772806892  |
| NM_022101    | CXorf56 | 296  | 338  | 8.01934542737  |
| NM_021103    | TMSB10  | 45   | 102  | 1.84626008333  |
| NM_021103    | TMSB10  | 183  | 238  | 0.257286713492 |
| NM_021101    | CLDN1   | 936  | 989  | 7.25740284275  |
| NM_021101    | CLDN1   | 2363 | 2403 | 7.43630477025  |
| NM_021101    | CLDN1   | 847  | 883  | 6.51642637947  |
| NM_021101    | CLDN1   | 173  | 238  | 8.2574095738   |
| NM_021101    | CLDN1   | 712  | 838  | 10.3949130976  |
| NM_021101    | CLDN1   | 343  | 472  | 9.84237207453  |
| NM_021101    | CLDN1   | 507  | 703  | 10.9578492919  |
| NM_021101    | CLDN1   | 246  | 331  | 7.52044397964  |
| NM_001943    | DSG2    | 1719 | 1757 | 6.01038175181  |
| NM_001943    | DSG2    | 1500 | 1554 | 5.78397196622  |
| NM_004467    | FGL1    | 308  | 344  | 0.86453529393  |
| NM_004467    | FGL1    | 560  | 603  | 3.86454202498  |
| NM_004467    | FGL1    | 932  | 1018 | 5.61942952715  |
| NM_004467    | FGL1    | 789  | 916  | 6.50839821476  |
| NM_004467    | FGL1    | 677  | 762  | 5.44950452571  |
| NM_004467    | FGL1    | 35   | 99   | 4.56498174313  |
| NM_004467    | FGL1    | 1037 | 1094 | 3.67189693949  |
| NM_004467    | FGL1    | 153  | 206  | 2.86454202476  |
| NM_004467    | FGL1    | 440  | 552  | 6.25685944776  |
| NM_004467    | FGL1    | 617  | 649  | 3.58775773766  |
| NM_004467    | FGL1    | 1213 | 1284 | 2.86454202498  |
| NM_004466    | GPC5    | 1357 | 1399 | 14.2484040671  |
| NM_001497    | B4GALT1 | 366  | 387  | 7.429815272    |
| NM_001497    | B4GALT1 | 1280 | 1315 | 8.43383287218  |
| NM_001497    | B4GALT1 | 625  | 657  | 7.43365912186  |
| NM_001497    | B4GALT1 | 892  | 952  | 8.84887037123  |
| NM_001493    | GDI1    | 250  | 285  | 4.01813996803  |
| NM_201413    | APP     | 413  | 466  | 4.42369392153  |
| NM_201413    | APP     | 1238 | 1309 | 5.21218981634  |
| NM_201413    | APP     | 1638 | 1667 | 0.964255571842 |
| NM_201413    | APP     | 1799 | 1843 | 3.9642623029   |
| NM_201413    | APP     | 569  | 607  | 3.2020511884   |
| NM_201413    | APP     | 108  | 168  | 4.42369392153  |
| NM_201413    | APP     | 1363 | 1412 | 4.42369392153  |
| NM_201413    | APP     | 4    | 43   | 1.88012309351  |
| NM_201413    | APP     | 2233 | 2321 | 5.54922480362  |
| NM_201413    | APP     | 607  | 647  | 4.28619039778  |
| NM_201413    | APP     | 1436 | 1510 | 4.42369392153  |
| NM_201413    | APP     | 1532 | 1623 | 5.54922480362  |
| NM_201413    | APP     | 344  | 389  | 3.54520720344  |

|           |         |      |      |                |
|-----------|---------|------|------|----------------|
| NM_201413 | APP     | 59   | 86   | 0.960244702723 |
| NM_201413 | APP     | 2362 | 2427 | 3.96426230289  |
| NM_201413 | APP     | 2430 | 2490 | 2.96426229535  |
| NM_201413 | APP     | 191  | 328  | 5.48782425895  |
| NM_201413 | APP     | 1848 | 2034 | 6.71914980506  |
| NM_201413 | APP     | 2039 | 2191 | 6.91845861328  |
| NM_201413 | APP     | 686  | 1219 | 8.84077924946  |
| NM_201413 | APP     | 1740 | 1794 | 2.46508559423  |
| NM_000014 | A2M     | 3306 | 3382 | 3.90681612888  |
| NM_000014 | A2M     | 2654 | 2696 | 2.04883513375  |
| NM_000014 | A2M     | 4297 | 4363 | 3.50826675239  |
| NM_000014 | A2M     | 1876 | 1976 | 4.57239708981  |
| NM_000014 | A2M     | 1349 | 1442 | 2.95572572936  |
| NM_000014 | A2M     | 1085 | 1135 | 2.63379763447  |
| NM_000014 | A2M     | 3582 | 3612 | 1.04883513375  |
| NM_000014 | A2M     | 2571 | 2622 | 1.85619005581  |
| NM_000014 | A2M     | 720  | 782  | 1.63362388416  |
| NM_000014 | A2M     | 2310 | 2392 | 3.57239708981  |
| NM_000014 | A2M     | 444  | 511  | 3.50826675239  |
| NM_000014 | A2M     | 4138 | 4182 | 2.21876013519  |
| NM_000014 | A2M     | 3229 | 3273 | 2.04883513375  |
| NM_000014 | A2M     | 1296 | 1347 | 1.04866138344  |
| NM_000014 | A2M     | 1154 | 1204 | 2.04883513375  |
| NM_000014 | A2M     | 3856 | 3966 | 4.44115255653  |
| NM_000014 | A2M     | 20   | 93   | 1.63379763447  |
| NM_000014 | A2M     | 4047 | 4081 | 2.85619005581  |
| NM_000014 | A2M     | 1682 | 1832 | 4.90681612888  |
| NM_000014 | A2M     | 4208 | 4291 | 4.2967626472   |
| NM_000014 | A2M     | 3126 | 3190 | 1.37076322842  |
| NM_000014 | A2M     | 525  | 588  | 2.50826675239  |
| NM_000014 | A2M     | 1027 | 1083 | 1.0488284027   |
| NM_000014 | A2M     | 1981 | 2052 | 3.136297975    |
| NM_000014 | A2M     | 4381 | 4597 | 4.90681612888  |
| NM_000014 | A2M     | 2413 | 2553 | 4.33423735262  |
| NM_000014 | A2M     | 206  | 399  | 4.97957247132  |
| NM_000014 | A2M     | 3517 | 3575 | 0.633623884156 |
| NM_000014 | A2M     | 878  | 1000 | 4.09322925311  |
| NM_000014 | A2M     | 1451 | 1678 | 5.11492432421  |
| NM_000014 | A2M     | 2095 | 2307 | 3.63379763447  |
| NM_000014 | A2M     | 3423 | 3511 | 3.2187601352   |
| NM_000014 | A2M     | 3614 | 3695 | 2.95572572936  |
| NM_000014 | A2M     | 2989 | 3057 | 1.37076322863  |
| NM_000014 | A2M     | 3695 | 3842 | 2.74927485189  |
| NM_000014 | A2M     | 2698 | 2865 | 5.15735959053  |
| NM_000014 | A2M     | 2872 | 2956 | 1.85619005581  |
| NM_133475 | ANKRD24 | 1091 | 1113 | 11.1796932677  |
| NM_000544 | TAP2    | 1358 | 1407 | 8.84567464251  |
| NM_000544 | TAP2    | 631  | 675  | 9.65302956456  |
| NM_030930 | UNC93B1 | 1137 | 1221 | 9.40608781024  |
| NM_017946 | FKBP14  | 548  | 588  | 8.16311364612  |

|              |           |      |      |                    |
|--------------|-----------|------|------|--------------------|
| NM_003897    | IER3      | 1161 | 1224 | 6.31035575185      |
| NM_003897    | IER3      | 415  | 477  | 6.98843438802      |
| NM_203304    | MEX3D     | 26   | 77   | 10.2786675183      |
| NM_153247    | SLC29A4   | 611  | 650  | 10.7632217214      |
| NM_017948    | NOL8      | 195  | 214  | 5.88227511408      |
| NM_004207    | SLC16A3   | 1029 | 1068 | 5.3626035533       |
| NM_001199260 | TOR1AIP2  |      | 1953 | 2024 10.7312364873 |
| XM_372741    | LOC390956 |      | 178  | 210 7.66108292622  |
| NM_020410    | ATP13A1   | 1603 | 1653 | 10.1499090056      |
| NM_020410    | ATP13A1   | 772  | 808  | 8.84337738239      |
| NM_020410    | ATP13A1   | 2818 | 2887 | 8.84337738239      |
| NM_020410    | ATP13A1   | 495  | 558  | 10.342554091       |
| NM_020410    | ATP13A1   | 3274 | 3323 | 9.9234989916       |
| NM_020410    | ATP13A1   | 1562 | 1602 | 10.5084614923      |
| NM_020410    | ATP13A1   | 1654 | 1708 | 8.92750986072      |
| NM_145059    | FUK       | 2023 | 2043 | 11.6980375857      |
| NM_015895    | GMNN      | 908  | 948  | 4.01628440391      |
| NM_017491    | WDR1      | 925  | 973  | 5.2081975002       |
| NM_017491    | WDR1      | 673  | 700  | 4.78931615106      |
| NM_015898    | ZBTB7A    | 205  | 271  | 9.14911469856      |
| NM_002140    | HNRNPK    | 1368 | 1411 | 4.28578395105      |
| NM_024085    | ATG9A     | 2004 | 2052 | 8.89673046337      |
| NM_024085    | ATG9A     | 1372 | 1410 | 9.31177445778      |
| NM_024089    | KDELC1    | 1829 | 1893 | 7.22161079813      |
| NM_024089    | KDELC1    | 1355 | 1403 | 7.22161752164      |
| NM_024089    | KDELC1    | 1913 | 1960 | 6.55251581908      |
| NM_024089    | KDELC1    | 768  | 810  | 6.63665479255      |
| NM_024089    | KDELC1    | 1179 | 1222 | 8.9585763923       |
| NM_024089    | KDELC1    | 1322 | 1354 | 7.1374783198       |
| NM_024089    | KDELC1    | 1063 | 1106 | 5.63665502092      |
| NM_001012664 | SLC3A2    | 1697 | 1742 | 8.47674784599      |
| NM_001012664 | SLC3A2    | 1056 | 1137 | 9.36127062857      |
| NM_001012664 | SLC3A2    | 1563 | 1626 | 8.23573974649      |
| NM_001012664 | SLC3A2    | 1893 | 1939 | 5.77613437754      |
| NM_001012664 | SLC3A2    | 814  | 860  | 7.36126389752      |
| NM_001012664 | SLC3A2    | 1631 | 1672 | 6.36127062103      |
| NM_001012664 | SLC3A2    | 1212 | 1252 | 7.58348929959      |
| NM_001012664 | SLC3A2    | 1751 | 1821 | 8.8637709691       |
| NM_001012664 | SLC3A2    | 875  | 925  | 7.9462331293       |
| NM_001012664 | SLC3A2    | 1179 | 1208 | 7.36127062103      |
| NM_001012664 | SLC3A2    | 1370 | 1562 | 9.47674784599      |
| NM_001012664 | SLC3A2    | 966  | 1027 | 8.09823622274      |
| NM_001012664 | SLC3A2    | 157  | 222  | 6.36127039266      |
| NM_001012664 | SLC3A2    | 390  | 465  | 6.77630812785      |
| NM_001012664 | SLC3A2    | 1253 | 1311 | 7.77630812785      |
| NM_003094    | SNRPE     | 113  | 183  | 3.08007281659      |
| NM_024551    | ADIPOR2   | 521  | 586  | 9.58006476905      |
| NM_024551    | ADIPOR2   | 48   | 77   | 6.87963178196      |
| NM_024551    | ADIPOR2   | 942  | 968  | 7.46458755163      |
| NM_005493    | RANBP9    | 345  | 370  | 5.8747300366       |

|              |         |      |      |                |
|--------------|---------|------|------|----------------|
| NM_005497    | GJC1    | 1271 | 1326 | 11.2298784141  |
| NM_005497    | GJC1    | 757  | 790  | 11.1457459358  |
| NM_080866    | SLC22A9 | 1458 | 1503 | 8.10325898147  |
| NM_080866    | SLC22A9 | 642  | 690  | 8.10726985059  |
| NM_080866    | SLC22A9 | 591  | 626  | 8.51829648074  |
| NM_080866    | SLC22A9 | 1059 | 1122 | 7.52231408091  |
| NM_018115    | SDAD1   | 2071 | 2091 | 3.97986711261  |
| NM_018447    | TMEM111 | 773  | 794  | 5.47857248236  |
| NM_001145306 | CDK6    | 255  | 288  | 10.3663043434  |
| NM_001145306 | CDK6    | 158  | 212  | 6.1183700989   |
| NM_014300    | SEC11A  | 812  | 874  | 3.48474561201  |
| NM_014300    | SEC11A  | 483  | 565  | 4.22153746341  |
| NM_014300    | SEC11A  | 767  | 809  | 4.70713780498  |
| NM_014300    | SEC11A  | 966  | 1036 | 2.89960936852  |
| NM_000918    | P4HB    | 1398 | 1510 | 4.86758723142  |
| NM_000918    | P4HB    | 135  | 256  | 3.19516188945  |
| NM_000918    | P4HB    | 653  | 731  | 4.58747931222  |
| NM_000918    | P4HB    | 2360 | 2412 | 0.195155158392 |
| NM_000918    | P4HB    | 2474 | 2506 | 0.111022680062 |
| NM_000918    | P4HB    | 1815 | 1921 | 3.36508689089  |
| NM_000918    | P4HB    | 1539 | 1735 | 5.83901807922  |
| NM_000918    | P4HB    | 292  | 488  | 4.2826247307   |
| NM_000918    | P4HB    | 1061 | 1158 | 2.89560160759  |
| NM_000918    | P4HB    | 942  | 1060 | 4.10205248505  |
| NM_000918    | P4HB    | 2148 | 2309 | 2.65459350808  |
| NM_000918    | P4HB    | 756  | 889  | 4.7187238455   |
| NM_000918    | P4HB    | 511  | 652  | 4.0025168115   |
| NM_000918    | P4HB    | 1165 | 1394 | 5.95004939161  |
| NM_000918    | P4HB    | 1988 | 2055 | 1.19516165353  |
| NM_001204368 | MGST2   | 441  | 469  | 4.52058583972  |
| NM_001204368 | MGST2   | 411  | 439  | 2.79335252688  |
| NM_001204368 | MGST2   | 495  | 542  | 3.79737012705  |
| NM_005671    | UBXN8   | 588  | 656  | 7.93749200982  |
| NM_016040    | TMED5   | 1082 | 1124 | 3.67669266469  |
| NM_016040    | TMED5   | 828  | 881  | 4.41365176372  |
| NM_016040    | TMED5   | 718  | 773  | 3.32951928539  |
| NM_016040    | TMED5   | 453  | 494  | 3.89908508603  |
| NM_198525    | KIF7    | 3649 | 3671 | 9.73767395727  |
| NM_001009    | RPS5    | 449  | 515  | 3.97288640643  |
| NM_001009    | RPS5    | 608  | 686  | 4.08836362385  |
| NM_001009    | RPS5    | 38   | 90   | 2.97271265611  |
| NM_004079    | CTSS    | 464  | 503  | 12.5737212854  |
| NM_004079    | CTSS    | 1093 | 1148 | 12.2517996857  |
| NM_004079    | CTSS    | 596  | 706  | 14.6441173444  |
| NM_004079    | CTSS    | 756  | 799  | 11.7526232129  |
| NM_001004    | RPLP2   | 165  | 225  | 2.46984831182  |
| NM_001004    | RPLP2   | 373  | 434  | 0.980403884477 |
| NM_001554    | CYR61   | 335  | 393  | 9.78582682992  |
| NM_001554    | CYR61   | 680  | 721  | 8.37096284505  |
| NM_001554    | CYR61   | 1008 | 1051 | 7.78600057269  |

|           |         |      |      |                 |
|-----------|---------|------|------|-----------------|
| NM_001554 | CYR61   | 589  | 636  | 7.78582682992   |
| NM_001554 | CYR61   | 737  | 793  | 8.28682387158   |
| NM_001554 | CYR61   | 937  | 1006 | 10.370963081    |
| NM_001554 | CYR61   | 1193 | 1299 | 8.37095634991   |
| NM_001000 | RPL39   | 334  | 387  | 1.06202977192   |
| NM_001003 | RPLP1   | 108  | 155  | 2.76751827204   |
| NM_001003 | RPLP1   | 313  | 348  | -0.043680499877 |
| NM_000201 | ICAM1   | 529  | 575  | 5.6707537487    |
| NM_000201 | ICAM1   | 1462 | 1579 | 8.08980884815   |
| NM_000201 | ICAM1   | 1326 | 1363 | 6.00566963877   |
| NM_000201 | ICAM1   | 997  | 1054 | 8.25973384959   |
| NM_000201 | ICAM1   | 1287 | 1319 | 6.89699001989   |
| NM_000201 | ICAM1   | 870  | 951  | 8.73366503792   |
| NM_000201 | ICAM1   | 628  | 691  | 7.41173694304   |
| NM_000201 | ICAM1   | 354  | 411  | 6.67477134132   |
| NM_000201 | ICAM1   | 1592 | 1783 | 9.1772716894    |
| NM_000201 | ICAM1   | 754  | 812  | 5.6707537487    |
| NM_000201 | ICAM1   | 1079 | 1278 | 9.29926221378   |
| NM_000972 | RPL7A   | 501  | 546  | 2.28408630271   |
| NM_000972 | RPL7A   | 341  | 385  | 1.28408630271   |
| NM_000972 | RPL7A   | 576  | 610  | 0.699123801993  |
| NM_000970 | RPL6    | 861  | 901  | 3.57109341936   |
| NM_000970 | RPL6    | 561  | 593  | 3.57109341936   |
| NM_000977 | RPL13   | 337  | 383  | 1.74676738942   |
| NM_000977 | RPL13   | 104  | 143  | 2.74275002516   |
| NM_000204 | CFI     | 1526 | 1586 | 4.00086506451   |
| NM_000204 | CFI     | 753  | 780  | 3.41188496362   |
| NM_000204 | CFI     | 1210 | 1261 | 3.00085833346   |
| NM_000204 | CFI     | 1379 | 1458 | 4.41590256379   |
| NM_000204 | CFI     | 1119 | 1166 | 5.00086506451   |
| NM_000204 | CFI     | 923  | 973  | 4.00086506451   |
| NM_000204 | CFI     | 1308 | 1356 | 4.87533418243   |
| NM_000204 | CFI     | 1603 | 1639 | 3.41589583274   |
| NM_000204 | CFI     | 656  | 686  | 4.41590256357   |
| NM_000204 | CFI     | 1801 | 1839 | 1.41590232787   |
| NM_000204 | CFI     | 576  | 609  | 2.99684746434   |
| NM_000204 | CFI     | 1034 | 1115 | 5.11634228193   |
| NM_000204 | CFI     | 689  | 740  | 3.00086505696   |
| NM_000208 | INSR    | 933  | 976  | 8.4708948192    |
| NM_000208 | INSR    | 3007 | 3030 | 6.14896672432   |
| NM_000208 | INSR    | 1727 | 1765 | 7.22908833353   |
| NM_000208 | INSR    | 3620 | 3654 | 7.14896672432   |
| NM_000208 | INSR    | 3129 | 3164 | 7.8178946841    |
| NM_000208 | INSR    | 2845 | 2879 | 6.22908833353   |
| NM_000208 | INSR    | 1619 | 1689 | 9.40303092759   |
| NM_000755 | CRAT    | 534  | 556  | 7.94002952014   |
| NM_000978 | RPL23   | 442  | 489  | -1.68100619746  |
| NM_199329 | SLC43A3 | 1025 | 1055 | 11.6230837672   |
| NM_199329 | SLC43A3 | 897  | 960  | 14.6271013674   |
| NM_199329 | SLC43A3 | 1304 | 1342 | 12.9450118621   |

|              |          |      |      |               |               |
|--------------|----------|------|------|---------------|---------------|
| NM_199329    | SLC43A3  | 1178 | 1206 | 11.6230837672 |               |
| NM_199329    | SLC43A3  | 1114 | 1151 | 12.1279246587 |               |
| NM_199329    | SLC43A3  | 1583 | 1648 | 13.6271013674 |               |
| NM_003957    | BRSK2    | 92   | 132  | 11.7487799239 |               |
| NM_003953    | MPZL1    | 153  | 190  | 7.67645881127 |               |
| NM_003953    | MPZL1    | 507  | 552  | 8.08251938449 |               |
| NM_003953    | MPZL1    | 693  | 784  | 8.56795294271 |               |
| NM_020644    | TMEM9B   | 647  | 707  | 6.59177524953 |               |
| NM_006694    | JTB      | 1041 | 1092 | 5.08106194182 |               |
| NM_139279    | MCFD2    | 412  | 440  | 2.13191866403 |               |
| NM_018653    | GPRC5C   | 1405 | 1448 | 6.16834823646 |               |
| NM_018653    | GPRC5C   | 711  | 752  | 4.16834823646 |               |
| NM_002468    | MYD88    | 481  | 502  | 6.18534961909 |               |
| NM_002462    | MX1      | 154  | 179  | 8.53062146456 |               |
| NM_022121    | PERP     | 662  | 699  | 7.72840762995 |               |
| NM_022121    | PERP     | 294  | 334  | 6.13942752906 |               |
| NM_022121    | PERP     | 763  | 819  | 5.14343839818 |               |
| NM_022121    | PERP     | 440  | 561  | 8.31337013067 |               |
| NM_004444    | EPHB4    | 1062 | 1150 | 9.42120923289 |               |
| NM_004444    | EPHB4    | 3303 | 3356 | 8.1988100805  |               |
| NM_004444    | EPHB4    | 2216 | 2270 | 8.9357821698  |               |
| NM_004444    | EPHB4    | 559  | 641  | 8.78377907635 |               |
| NM_012242    | DKK1     | 1372 | 1408 | 8.64492264445 |               |
| NM_012242    | DKK1     | 915  | 960  | 8.0753566079  |               |
| NM_012242    | DKK1     | 1077 | 1188 | 10.4225302231 |               |
| NM_012242    | DKK1     | 523  | 673  | 12.047021088  |               |
| NM_012242    | DKK1     | 455  | 514  | 9.29699934103 |               |
| NM_012242    | DKK1     | 681  | 911  | 13.27219595   |               |
| NM_012242    | DKK1     | 356  | 450  | 11.1594958173 |               |
| NM_012242    | DKK1     | 265  | 355  | 9.53800744053 |               |
| NM_012242    | DKK1     | 961  | 1070 | 9.00749272383 |               |
| NM_012242    | DKK1     | 6    | 261  | 11.7202107718 |               |
| NM_201430    | RTN3     | 321  | 379  | 6.85290504546 |               |
| NM_201430    | RTN3     | 1006 | 1063 | 4.5269593504  |               |
| NM_201430    | RTN3     | 534  | 574  | 5.53097694302 |               |
| NM_201430    | RTN3     | 216  | 261  | 6.11192185112 |               |
| NM_201430    | RTN3     | 435  | 520  | 6.70090195201 |               |
| NM_201430    | RTN3     | 613  | 788  | 8.99040856921 |               |
| NM_001619    | ADRBK1   | 217  | 245  | 4.72300263531 |               |
| NM_004995    | MMP14    | 926  | 968  | 10.2871223659 |               |
| NM_004995    | MMP14    | 1227 | 1282 | 9.86807399755 |               |
| NM_004995    | MMP14    | 1791 | 1896 | 11.0944840191 |               |
| NM_001610    | ACP2     | 463  | 495  | 6.91647974673 |               |
| NM_001610    | ACP2     | 429  | 458  | 6.91647974673 |               |
| NM_001610    | ACP2     | 667  | 756  | 9.50545984762 |               |
| NM_001610    | ACP2     | 2119 | 2153 | 6.83635813752 |               |
| NM_001128431 | SLC39A14 |      | 1557 | 1602          | 5.03981318991 |
| NM_001128431 | SLC39A14 |      | 629  | 690           | 6.71789182608 |
| NM_001128431 | SLC39A14 |      | 1518 | 1555          | 5.30285409088 |
| NM_001128431 | SLC39A14 |      | 1072 | 1213          | 7.57587282121 |

|              |              |      |      |                 |
|--------------|--------------|------|------|-----------------|
| NM_001128431 | SLC39A14     | 747  | 777  | 3.7138742259    |
| NM_001128431 | SLC39A14     | 1628 | 1690 | 4.71789182586   |
| NM_001128431 | SLC39A14     | 65   | 115  | 5.21871511741   |
| NM_001128431 | SLC39A14     | 419  | 472  | 3.71771807576   |
| NM_001128431 | SLC39A14     | 920  | 1034 | 6.3028543268    |
| NM_001614    | ACTG1 1257   | 1292 |      | -0.876738759621 |
| NM_001614    | ACTG1 444    | 484  |      | 1.12326124038   |
| NM_001614    | ACTG1 356    | 400  |      | 1.12326101201   |
| NM_001614    | ACTG1 744    | 822  |      | 1.44518934282   |
| NM_001614    | ACTG1 661    | 715  |      | 2.29318624937   |
| NM_001614    | ACTG1 1382   | 1451 |      | 1.4450155925    |
| NM_001614    | ACTG1 70     | 135  |      | 1.70822374865   |
| NM_001614    | ACTG1 230    | 304  |      | 2.82370096607   |
| NM_001614    | ACTG1 548    | 616  |      | -0.87691250239  |
| NM_001614    | ACTG1 976    | 1045 |      | 3.03015184354   |
| NM_020784    | TXNDC16 1042 | 1070 |      | 7.65388108521   |
| NM_001206840 | TGOLN2 1496  | 1546 |      | 7.04157504019   |
| NM_001206840 | TGOLN2 5344  | 5393 |      | 3.78751083691   |
| NM_001206840 | TGOLN2 2096  | 2145 |      | 5.86763244612   |
| NM_001206840 | TGOLN2 864   | 897  |      | 5.87164981038   |
| NM_001206840 | TGOLN2 580   | 686  |      | 6.45661254702   |
| NM_001206840 | TGOLN2 1283  | 1357 |      | 6.45661254702   |
| NM_001206840 | TGOLN2 5681  | 5751 |      | 6.19357141013   |
| NM_020781    | ZNF398 179   | 199  |      | 11.2450866207   |
| NM_020781    | ZNF398 5196  | 5216 |      | 11.1611211617   |
| NM_032802    | SPPL2A 1032  | 1105 |      | 8.68741305334   |
| NM_032802    | SPPL2A 1530  | 1578 |      | 7.24070376457   |
| NM_032802    | SPPL2A 668   | 700  |      | 6.43334884251   |
| NM_001010911 | C10orf114    | 1706 | 1728 | 9.928067721     |
| NM_001164723 | PTAFR 1779   | 1800 |      | 9.19531848163   |
| NM_001024736 | CD276 1654   | 1710 |      | 6.39090285089   |
| NM_001024736 | CD276 1773   | 1822 |      | 7.12786844505   |
| NM_006597    | HSPA8 1441   | 1530 |      | 2.16632883132   |
| NM_006597    | HSPA8 2251   | 2299 |      | 1.84038313626   |
| NM_006597    | HSPA8 1043   | 1090 |      | 2.42936323715   |
| NM_006597    | HSPA8 910    | 964  |      | 1.34522402777   |
| NM_006597    | HSPA8 1165   | 1269 |      | 4.01432573787   |
| NM_006597    | HSPA8 1979   | 2004 |      | 1.42534563698   |
| NM_006597    | HSPA8 751    | 831  |      | 2.4293632296    |
| NM_006597    | HSPA8 1694   | 1866 |      | 3.65175565849   |
| NM_006597    | HSPA8 2027   | 2089 |      | 1.76026152704   |
| NM_006598    | SLC12A7 2205 | 2287 |      | 8.3410052142    |
| NM_006598    | SLC12A7 2601 | 2647 |      | 5.75603598243   |
| NM_006598    | SLC12A7 429  | 529  |      | 8.92596771471   |
| NM_006598    | SLC12A7 2480 | 2544 |      | 6.6719035041    |
| NM_006598    | SLC12A7 1753 | 1865 |      | 8.92596771493   |
| NM_018490    | LGR4 3238    | 3293 |      | 6.39098421539   |
| NM_005575    | LNPEP 2864   | 2890 |      | 11.3558441337   |
| NM_005474    | HDAC5 3049   | 3068 |      | 4.72291208648   |
| NM_018461    | PPP2R2D 377  | 415  |      | 5.34112847829   |



|              |         |      |      |               |
|--------------|---------|------|------|---------------|
| NM_207122    | EXT2    | 1378 | 1429 | 8.13931966663 |
| NM_207122    | EXT2    | 1947 | 1981 | 7.80824762641 |
| NM_152734    | C6orf89 | 570  | 618  | 8.67937919208 |
| NM_023000    | ARID4A  | 1310 | 1352 | 4.64605677808 |
| NM_032020    | FUCA2   | 1016 | 1059 | 6.54367415887 |
| NM_032020    | FUCA2   | 1282 | 1319 | 3.95870493465 |
| NM_032020    | FUCA2   | 347  | 395  | 5.53965656625 |
| NM_032020    | FUCA2   | 249  | 298  | 4.87457245632 |
| NM_032020    | FUCA2   | 670  | 725  | 5.95870493465 |
| NM_032020    | FUCA2   | 868  | 969  | 8.76606658776 |
| NM_032020    | FUCA2   | 728  | 788  | 6.28063976058 |
| NM_152556    | C7orf60 | 3154 | 3173 | 8.05612300592 |
| NM_152881    | PTK7    | 9    | 53   | 5.34963343502 |
| NM_016029    | DHRS7   | 318  | 358  | 8.62459723086 |
| NM_016029    | DHRS7   | 239  | 311  | 7.8174158232  |
| NM_016029    | DHRS7   | 1114 | 1165 | 7.81741605911 |
| NM_016029    | DHRS7   | 675  | 762  | 6.81339845895 |
| NM_016026    | RDH11   | 547  | 579  | 4.99251722322 |
| NM_016026    | RDH11   | 292  | 335  | 6.66161893332 |
| NM_016026    | RDH11   | 749  | 792  | 7.24658143404 |
| NM_016026    | RDH11   | 458  | 521  | 6.661445183   |
| NM_016026    | RDH11   | 795  | 846  | 5.07648268228 |
| NM_016026    | RDH11   | 193  | 273  | 4.07664970155 |
| NM_016026    | RDH11   | 891  | 1043 | 7.39858452749 |
| NM_015051    | ERP44   | 641  | 684  | 6.2281056983  |
| NM_015051    | ERP44   | 754  | 802  | 7.3656159531  |
| NM_015051    | ERP44   | 868  | 945  | 6.71353252547 |
| NM_015051    | ERP44   | 694  | 748  | 5.90216673429 |
| NM_015051    | ERP44   | 966  | 997  | 3.82204512508 |
| NM_033198    | PIGS    | 1851 | 1878 | 6.22364628094 |
| NM_033198    | PIGS    | 1731 | 1785 | 6.80860878166 |
| NM_033198    | PIGS    | 950  | 996  | 7.30778525441 |
| NM_033198    | PIGS    | 783  | 828  | 6.88873039087 |
| NM_138501    | TECR    | 292  | 350  | 7.1764511093  |
| NM_138501    | TECR    | 807  | 868  | 5.93848847348 |
| NM_138501    | TECR    | 719  | 750  | 7.51960712435 |
| NM_138501    | TECR    | 130  | 210  | 7.52362472452 |
| NM_138501    | TECR    | 1016 | 1076 | 4.93866198788 |
| NM_000224    | KRT18   | 579  | 630  | 3.71745287579 |
| NM_000224    | KRT18   | 691  | 730  | 3.71745287579 |
| NM_000224    | KRT18   | 1117 | 1163 | 1.71344200668 |
| NM_000224    | KRT18   | 362  | 454  | 5.17689122549 |
| NM_000224    | KRT18   | 501  | 579  | 2.71745287579 |
| NM_017770    | ELOVL2  | 628  | 689  | 7.47199216833 |
| NM_001031835 | PHKB    | 3426 | 3447 | 5.58720954942 |
| NM_024923    | NUP210  | 3485 | 3531 | 6.01913079834 |
| NM_024923    | NUP210  | 901  | 952  | 8.82246835614 |
| NM_024923    | NUP210  | 4371 | 4415 | 8.25691991976 |
| NM_024923    | NUP210  | 432  | 504  | 8.33704152897 |
| NM_024923    | NUP210  | 773  | 848  | 8.51995432559 |

|              |         |      |      |                 |
|--------------|---------|------|------|-----------------|
| NM_024923    | NUP210  | 4548 | 4576 | 7.01511343408   |
| NM_024923    | NUP210  | 536  | 609  | 8.60408680392   |
| NM_017510    | TMED9   | 255  | 299  | 2.34803708485   |
| NM_017510    | TMED9   | 603  | 649  | 4.93317333567   |
| NM_017510    | TMED9   | 651  | 691  | 3.93317309998   |
| NM_017510    | TMED9   | 355  | 382  | 2.26407162579   |
| NM_017510    | TMED9   | 493  | 539  | 6.15556575723   |
| NM_017510    | TMED9   | 389  | 445  | 4.66996517974   |
| NM_017510    | TMED9   | 122  | 248  | 6.25510143078   |
| NM_017510    | TMED9   | 0    | 101  | 5.80764245381   |
| NM_173647    | RNF149  | 278  | 325  | 7.12813336392   |
| NM_173647    | RNF149  | 716  | 745  | 6.04801175471   |
| NM_017519    | ARID1B  | 1365 | 1393 | 6.17064748639   |
| NM_017518    | HAUS7   | 97   | 117  | 10.4460293018   |
| NM_001017367 | C4BPB   | 245  | 284  | 4.66102488615   |
| NM_139075    | TPCN2   | 2268 | 2311 | 9.19302017947   |
| NM_153705    | KDELC2  | 342  | 406  | 6.66553261968   |
| NM_153702    | ELMOD2  | 447  | 479  | 6.49972229435   |
| NM_001080424 | KDM6B   | 6075 | 6098 | 9.28315051943   |
| NM_006367    | CAP1    | 1178 | 1207 | 4.46415434722   |
| NM_001622    | AHSG    | 766  | 828  | 0.384496197187  |
| NM_001622    | AHSG    | 1111 | 1164 | 1.38449619719   |
| NM_001622    | AHSG    | 893  | 962  | 2.0219261178    |
| NM_001622    | AHSG    | 28   | 140  | 1.79953369647   |
| NM_001622    | AHSG    | 140  | 237  | 2.85842738552   |
| NM_001622    | AHSG    | 1345 | 1389 | -0.463674459686 |
| NM_001622    | AHSG    | 1173 | 1215 | -1.20046653945  |
| NM_001622    | AHSG    | 965  | 1063 | 2.16876750613   |
| NM_001622    | AHSG    | 1293 | 1331 | -1.28460551292  |
| NM_001622    | AHSG    | 1409 | 1564 | 2.96945869791   |
| NM_001622    | AHSG    | 249  | 728  | 5.05377498384   |
| NM_020755    | SERINC1 | 1123 | 1213 | 7.41260023342   |
| NM_020755    | SERINC1 | 1010 | 1056 | 6.46918376178   |
| NM_020755    | SERINC1 | 331  | 372  | 5.35353279404   |
| NM_020755    | SERINC1 | 199  | 260  | 2.76873731259   |
| NM_020755    | SERINC1 | 34   | 94   | 6.22817566227   |
| NM_020755    | SERINC1 | 769  | 836  | 4.34968894419   |
| NM_020755    | SERINC1 | 600  | 729  | 7.72294035403   |
| NM_020755    | SERINC1 | 1332 | 1409 | 5.09067213853   |
| NM_020205    | OTUD7B  | 1982 | 2004 | 9.70548045188   |
| NM_001627    | ALCAM   | 816  | 861  | 7.14082380336   |
| NM_001627    | ALCAM   | 1253 | 1314 | 7.14082380337   |
| NM_001627    | ALCAM   | 696  | 758  | 6.91842465098   |
| NM_001627    | ALCAM   | 2370 | 2415 | 5.91842465098   |
| NM_001627    | ALCAM   | 1004 | 1066 | 8.24035947692   |
| NM_001627    | ALCAM   | 1580 | 1655 | 6.33346888131   |
| NM_001627    | ALCAM   | 1760 | 1805 | 5.32945128113   |
| NM_001627    | ALCAM   | 2279 | 2329 | 6.91825763171   |
| NM_001627    | ALCAM   | 1846 | 1913 | 7.5033871517    |
| NM_001627    | ALCAM   | 2160 | 2200 | 5.91441378186   |

|              |          |      |      |                    |
|--------------|----------|------|------|--------------------|
| NM_005861    | STUB1    | 179  | 198  | 4.6778451612       |
| NM_015202    | KIAA0556 |      | 1739 | 1758 9.42314894468 |
| NM_015202    | KIAA0556 |      | 4579 | 4599 9.42331596395 |
| NM_002489    | NDUFA4   | 184  | 245  | 3.50585187566      |
| NM_002489    | NDUFA4   | 326  | 369  | 4.82376910142      |
| NM_002489    | NDUFA4   | 60   | 134  | 5.30919592859      |
| NM_031903    | MRPL32   | 426  | 473  | 6.08034671332      |
| NM_031903    | MRPL32   | 506  | 573  | 4.08035344415      |
| NM_001143852 | TCHP     | 2986 | 3008 | 6.04758351001      |
| NM_005134    | PPP4R1   | 9    | 36   | 6.78870908741      |
| NM_001909    | CTSD     | 1558 | 1590 | 5.02697172587      |
| NM_001909    | CTSD     | 315  | 402  | 6.69011048891      |
| NM_001909    | CTSD     | 882  | 939  | 6.52964581672      |
| NM_001909    | CTSD     | 219  | 283  | 5.61210797691      |
| NM_001909    | CTSD     | 1475 | 1553 | 6.02714547619      |
| NM_001909    | CTSD     | 1032 | 1074 | 4.02312787602      |
| NM_001909    | CTSD     | 1884 | 1921 | 4.35804376609      |
| NM_001909    | CTSD     | 1617 | 1689 | 5.44218297547      |
| NM_001909    | CTSD     | 1140 | 1331 | 7.79973498009      |
| NM_001909    | CTSD     | 151  | 218  | 6.34907357108      |
| NM_001909    | CTSD     | 748  | 878  | 7.57146599242      |
| NM_001909    | CTSD     | 949  | 1032 | 6.14262269361      |
| NM_001909    | CTSD     | 524  | 672  | 6.34907357108      |
| NM_001909    | CTSD     | 405  | 499  | 6.96574493153      |
| NM_000506    | F2       | 1001 | 1069 | 4.05973847612      |
| NM_000506    | F2       | 338  | 400  | 3.79670406273      |
| NM_000506    | F2       | 781  | 855  | 3.0597384759       |
| NM_000506    | F2       | 1558 | 1590 | 2.97559926673      |
| NM_000506    | F2       | 1116 | 1174 | 3.05572087594      |
| NM_000504    | F10      | 656  | 723  | 4.93683786877      |
| NM_000504    | F10      | 469  | 522  | 4.57025018921      |
| NM_000504    | F10      | 361  | 418  | 2.68277365794      |
| NM_000504    | F10      | 1062 | 1150 | 5.46735258547      |
| NM_001634    | AMD1     | 756  | 815  | 5.32622837502      |
| NM_001633    | AMBP     | 179  | 239  | 0.923623847194     |
| NM_001633    | AMBP     | 1323 | 1379 | 1.65657184141      |
| NM_001633    | AMBP     | 661  | 827  | 4.92362384742      |
| NM_001633    | AMBP     | 351  | 588  | 5.44718580347      |
| NM_001633    | AMBP     | 1187 | 1309 | 3.50858634814      |
| NM_001633    | AMBP     | 1002 | 1186 | 5.56748003719      |
| NM_001633    | AMBP     | 831  | 986  | 5.06658180126      |
| NM_032824    | TMEM87B  | 1187 | 1223 | 7.34446187647      |
| NM_032824    | TMEM87B  | 1554 | 1588 | 9.88803270449      |
| NM_007190    | SEC23IP  | 486  | 506  | 6.60245510934      |
| NM_015853    | UBXN1    | 291  | 343  | 5.97162003869      |
| NM_003851    | CREG1    | 663  | 693  | 11.3871503256      |
| NM_003851    | CREG1    | 442  | 466  | 10.1647579043      |
| NM_003851    | CREG1    | 525  | 558  | 8.66392788192      |
| NM_203341    | SEP15    | 453  | 520  | 7.08678163364      |
| NM_203341    | SEP15    | 651  | 741  | 7.57220846081      |

|              |         |      |      |               |
|--------------|---------|------|------|---------------|
| NM_203346    | HDLBP   | 120  | 168  | 1.56582198697 |
| NM_182828    | GDF7    | 694  | 728  | 10.9165190638 |
| NM_002105    | H2AFX   | 295  | 372  | 7.04461751494 |
| NM_002106    | H2AFZ   | 299  | 353  | 2.53886722517 |
| NM_002106    | H2AFZ   | 530  | 603  | 3.11981885678 |
| NM_024047    | NUDT9   | 927  | 979  | 7.80323772943 |
| NM_024047    | NUDT9   | 738  | 810  | 7.06627189957 |
| NM_001084393 | DDTL    | 137  | 233  | 9.92231234326 |
| NM_001084392 | DDT     | 137  | 233  | 7.2544074643  |
| NM_001205254 | OCLN    | 1565 | 1611 | 7.20734358182 |
| NM_001205254 | OCLN    | 856  | 907  | 6.79247310181 |
| NM_001205254 | OCLN    | 1424 | 1467 | 7.01487224665 |
| NM_001205254 | OCLN    | 1475 | 1522 | 7.01085465403 |
| NM_001205254 | OCLN    | 985  | 1050 | 7.52927167671 |
| NM_002818    | PSME2   | 222  | 256  | 4.59342154305 |
| NM_002336    | LRP6    | 595  | 637  | 7.08429693334 |
| NM_012401    | PLXNB2  | 3708 | 3768 | 6.48084099736 |
| NM_012401    | PLXNB2  | 188  | 243  | 6.06580349809 |
| NM_012401    | PLXNB2  | 3951 | 4007 | 7.28819591942 |
| NM_012401    | PLXNB2  | 3226 | 3286 | 8.18128071551 |
| NM_012401    | PLXNB2  | 938  | 982  | 7.65076599126 |
| NM_012401    | PLXNB2  | 3357 | 3401 | 6.79875149208 |
| NM_012401    | PLXNB2  | 2599 | 2649 | 4.48084099714 |
| NM_012401    | PLXNB2  | 4637 | 4714 | 7.80276909225 |
| NM_012401    | PLXNB2  | 626  | 677  | 7.06580349809 |
| NM_012401    | PLXNB2  | 4152 | 4205 | 6.8027690847  |
| NM_012401    | PLXNB2  | 3294 | 3341 | 7.65076599881 |
| NM_012401    | PLXNB2  | 493  | 526  | 5.47682339719 |
| NM_012401    | PLXNB2  | 2658 | 2698 | 7.80276909225 |
| NM_012401    | PLXNB2  | 2115 | 2197 | 7.28819591942 |
| NM_012401    | PLXNB2  | 3784 | 3914 | 9.28819591942 |
| NM_012401    | PLXNB2  | 1274 | 1335 | 6.48084099736 |
| NM_012401    | PLXNB2  | 4211 | 4348 | 9.33882199249 |
| NM_012401    | PLXNB2  | 2710 | 2745 | 6.9816642887  |
| NM_012401    | PLXNB2  | 4736 | 4777 | 7.06562974777 |
| NM_012401    | PLXNB2  | 1928 | 1974 | 6.06178589791 |
| NM_012401    | PLXNB2  | 3611 | 3650 | 6.80276885633 |
| NM_012401    | PLXNB2  | 5756 | 5797 | 7.06580349808 |
| NM_012401    | PLXNB2  | 2844 | 2888 | 5.39670178798 |
| NM_012401    | PLXNB2  | 4431 | 4527 | 8.65076599881 |
| NM_012401    | PLXNB2  | 4917 | 4988 | 5.48084076145 |
| NM_012401    | PLXNB2  | 3428 | 3585 | 8.65076599881 |
| NM_012401    | PLXNB2  | 1400 | 1484 | 7.28819591942 |
| NM_012401    | PLXNB2  | 18   | 75   | 6.48083426631 |
| NM_003676    | DEGS1   | 514  | 564  | 10.8647310188 |
| NM_003676    | DEGS1   | 564  | 602  | 9.27976178702 |
| NM_003676    | DEGS1   | 625  | 670  | 8.95783369213 |
| NM_003676    | DEGS1   | 406  | 469  | 9.27959476776 |
| NM_003676    | DEGS1   | 1001 | 1040 | 6.95766667287 |
| NM_018407    | LAPTM4B | 743  | 794  | 7.29303095869 |

|              |           |      |      |                    |
|--------------|-----------|------|------|--------------------|
| NM_018407    | LAPTM4B   | 650  | 704  | 6.87799322349      |
| NM_018407    | LAPTM4B   | 485  | 552  | 7.6109414534       |
| NM_018407    | LAPTM4B   | 342  | 378  | 4.28901335852      |
| NM_018407    | LAPTM4B   | 933  | 964  | 6.87781970909      |
| NM_005631    | SMO       | 2520 | 2539 | 8.0429577428       |
| NM_152716    | PATL1     | 1363 | 1383 | 6.76755942021      |
| NM_152713    | STT3A     | 1606 | 1682 | 5.1260398692       |
| NM_152713    | STT3A     | 2234 | 2265 | 4.53705976831      |
| NM_152713    | STT3A     | 700  | 761  | 7.24151708662      |
| NM_152713    | STT3A     | 2121 | 2197 | 7.86300546337      |
| NM_152713    | STT3A     | 109  | 153  | 5.54107063743      |
| NM_152713    | STT3A     | 1512 | 1551 | 7.34843229054      |
| NM_152713    | STT3A     | 473  | 522  | 7.1260398692       |
| NM_152713    | STT3A     | 2011 | 2051 | 6.34843228299      |
| NM_152713    | STT3A     | 1064 | 1117 | 5.77886625399      |
| NM_152713    | STT3A     | 2317 | 2349 | 3.54090361816      |
| NM_152713    | STT3A     | 311  | 350  | 4.54107736093      |
| NM_152713    | STT3A     | 2760 | 2815 | 7.24134333631      |
| NM_152713    | STT3A     | 1859 | 1906 | 6.34825854022      |
| NM_152713    | STT3A     | 1146 | 1234 | 7.24151708662      |
| NM_152713    | STT3A     | 375  | 425  | 4.54107063743      |
| NM_152713    | STT3A     | 1238 | 1319 | 6.54107736848      |
| NM_152713    | STT3A     | 1687 | 1749 | 4.54090361816      |
| NM_152713    | STT3A     | 219  | 293  | 6.34843229054      |
| NM_152713    | STT3A     | 793  | 901  | 8.24151708662      |
| NM_152713    | STT3A     | 1914 | 1974 | 5.86300546337      |
| NM_152713    | STT3A     | 578  | 665  | 7.24151708662      |
| NM_032595    | PPP1R9B   | 1740 | 1761 | 6.14644077566      |
| NM_001077628 | APH1A     | 912  | 974  | 8.12432146704      |
| NM_003844    | TNFRSF10A |      | 1174 | 1221 10.4950717181 |
| NM_138709    | DAB2IP    | 2891 | 2910 | 6.95336265074      |
| NM_001144072 | UBAC2     | 858  | 901  | 7.92084412409      |
| NM_001144072 | UBAC2     | 1222 | 1256 | 7.0997460516       |
| NM_001144072 | UBAC2     | 1086 | 1162 | 7.91683325497      |
| NM_015073    | SIPA1L3   | 1378 | 1407 | 10.2881789121      |
| NM_001018136 | NME1-NME2 |      | 875  | 951 4.17368892326  |
| NM_001018136 | NME1-NME2 |      | 589  | 650 1.58872618684  |
| NM_033316    | MFI2      | 733  | 826  | 9.89739654107      |
| NM_021626    | SCPEP1    | 1129 | 1176 | 6.46877715286      |
| NM_021626    | SCPEP1    | 1103 | 1129 | 6.46895066726      |
| NM_017754    | UHRF1BP1  |      | 2712 | 2730 7.93071592684 |
| NM_017750    | RETSAT    | 1146 | 1192 | 7.16916617976      |
| NM_017750    | RETSAT    | 859  | 888  | 7.16916617976      |
| NM_017750    | RETSAT    | 1096 | 1135 | 8.16916617976      |
| NM_001114123 | ELK1      | 2399 | 2423 | 8.64469812803      |
| NM_178324    | SPTLC1    | 478  | 524  | 5.78605699686      |
| NM_178324    | SPTLC1    | 227  | 306  | 6.10798509174      |
| NM_001199322 | MUTED     | 32   | 50   | 4.59173636339      |
| NM_000245    | MET       | 3972 | 4023 | 9.72892074645      |
| NM_000245    | MET       | 1911 | 1961 | 9.64495528739      |

|              |        |      |      |               |
|--------------|--------|------|------|---------------|
| NM_000245    | MET    | 968  | 1006 | 9.46588634062 |
| NM_000245    | MET    | 1015 | 1079 | 10.3140569975 |
| NM_000245    | MET    | 1818 | 1861 | 7.14395824573 |
| NM_000245    | MET    | 3497 | 3533 | 9.72909426085 |
| NM_000715    | C4BPA  | 1136 | 1207 | 9.31323015866 |
| NM_000715    | C4BPA  | 431  | 517  | 8.54769517638 |
| NM_000715    | C4BPA  | 1552 | 1608 | 9.13265791302 |
| NM_000715    | C4BPA  | 2134 | 2183 | 6.22576730986 |
| NM_000715    | C4BPA  | 837  | 880  | 7.81072958221 |
| NM_000715    | C4BPA  | 1625 | 1790 | 10.0837483125 |
| NM_000715    | C4BPA  | 550  | 689  | 9.86962350718 |
| NM_000715    | C4BPA  | 1803 | 1866 | 8.81072981813 |
| NM_000715    | C4BPA  | 1903 | 1973 | 9.31323015866 |
| NM_000715    | C4BPA  | 1211 | 1303 | 9.92620703555 |
| NM_000715    | C4BPA  | 266  | 330  | 8.5476954123  |
| NM_006389    | HYOU1  | 1327 | 1387 | 7.50927165671 |
| NM_006389    | HYOU1  | 1212 | 1311 | 8.46036205623 |
| NM_006389    | HYOU1  | 600  | 649  | 5.60237433005 |
| NM_006389    | HYOU1  | 2804 | 2862 | 5.92430914844 |
| NM_006389    | HYOU1  | 2062 | 2097 | 3.51824185172 |
| NM_006389    | HYOU1  | 3158 | 3242 | 7.18734356182 |
| NM_006389    | HYOU1  | 2344 | 2368 | 4.60220731078 |
| NM_006389    | HYOU1  | 3103 | 3153 | 5.92430242493 |
| NM_006389    | HYOU1  | 2396 | 2456 | 6.1873435616  |
| NM_006389    | HYOU1  | 2527 | 2603 | 7.05779507956 |
| NM_006389    | HYOU1  | 700  | 776  | 5.92029155581 |
| NM_006389    | HYOU1  | 1583 | 1656 | 6.18734356182 |
| NM_006389    | HYOU1  | 1051 | 1130 | 4.60220731078 |
| NM_006389    | HYOU1  | 1710 | 1786 | 5.18733683077 |
| NM_002712    | PPP1R7 | 2049 | 2070 | 4.50536065275 |
| NM_005845    | ABCC4  | 1670 | 1707 | 8.84843985908 |
| NM_005845    | ABCC4  | 1767 | 1812 | 10.4335693791 |
| NM_005845    | ABCC4  | 2664 | 2698 | 10.7644744    |
| NM_001007027 | ALG8   | 483  | 539  | 9.89954935731 |
| NM_001007027 | ALG8   | 772  | 819  | 10.3849764202 |
| NM_001007027 | ALG8   | 913  | 983  | 10.3809588202 |
| NM_001007027 | ALG8   | 699  | 726  | 8.49348228896 |
| NM_018340    | CPPED1 | 563  | 582  | 5.4728412135  |
| NM_001382    | DPAGT1 | 928  | 967  | 11.0708387745 |
| NM_000527    | LDLR   | 953  | 1023 | 7.63526999108 |
| NM_000527    | LDLR   | 2725 | 2789 | 7.48326689741 |
| NM_000527    | LDLR   | 556  | 609  | 7.48326689763 |
| NM_000527    | LDLR   | 2480 | 2522 | 5.89428679674 |
| NM_000527    | LDLR   | 835  | 932  | 7.89830439691 |
| NM_000527    | LDLR   | 1051 | 1168 | 7.89830439691 |
| NM_000527    | LDLR   | 1644 | 1715 | 6.31334188864 |
| NM_000527    | LDLR   | 1756 | 1838 | 8.2202324918  |
| NM_000520    | HEXA   | 671  | 717  | 8.47523305053 |
| NM_000520    | HEXA   | 1481 | 1545 | 7.47523305053 |
| NM_000520    | HEXA   | 720  | 790  | 6.73826744882 |

|              |         |       |       |                |
|--------------|---------|-------|-------|----------------|
| NM_000520    | HEXA    | 913   | 942   | 6.73826072531  |
| NM_000520    | HEXA    | 1014  | 1072  | 7.15330495565  |
| NM_000520    | HEXA    | 1551  | 1607  | 5.14928735547  |
| NM_000520    | HEXA    | 587   | 619   | 6.15313120533  |
| NM_000520    | HEXA    | 1637  | 1705  | 8.73826745637  |
| NM_000521    | HEXB    | 297   | 358   | 7.00128438731  |
| NM_000521    | HEXB    | 1501  | 1535  | 7.00145140658  |
| NM_000521    | HEXB    | 1684  | 1741  | 6.67952331169  |
| NM_000521    | HEXB    | 1612  | 1671  | 7.26449254346  |
| NM_000521    | HEXB    | 1382  | 1501  | 8.4868849648   |
| NM_018963    | BRWD1   | 171   | 200   | 5.65278400731  |
| NM_000528    | MAN2B1  | 2190  | 2237  | 7.53994401737  |
| NM_000528    | MAN2B1  | 2440  | 2477  | 9.12891738721  |
| NM_000528    | MAN2B1  | 86    | 140   | 8.78175050305  |
| NM_000528    | MAN2B1  | 2509  | 2599  | 10.1289241183  |
| NM_000528    | MAN2B1  | 1344  | 1376  | 8.12490651809  |
| NM_000528    | MAN2B1  | 872   | 920   | 7.54396138163  |
| NM_000528    | MAN2B1  | 2828  | 2872  | 7.45982240816  |
| NM_001654    | ARAF    | 1161  | 1180  | 6.84618565393  |
| NM_001657    | AREG    | 774   | 815   | 8.52362326796  |
| NM_001657    | AREG    | 298   | 372   | 10.0227997407  |
| NM_001657    | AREG    | 905   | 972   | 9.60776247734  |
| NM_001165895 | CD320   | 105   | 164   | 6.10862377767  |
| NM_001165895 | CD320   | 401   | 447   | 8.28256637929  |
| NM_001165895 | CD320   | 250   | 319   | 7.11263464679  |
| NM_032847    | C8orf76 | 1040  | 1094  | 8.82766670871  |
| NM_032842    | TMEM209 | 826   | 859   | 9.96115377325  |
| NM_032842    | TMEM209 | 1760  | 1809  | 8.37619127253  |
| NM_000384    | APOB    | 9681  | 9718  | 3.32899732104  |
| NM_000384    | APOB    | 5085  | 5166  | 4.06596291521  |
| NM_000384    | APOB    | 2834  | 2890  | 3.55138974238  |
| NM_000384    | APOB    | 5977  | 6031  | 4.06596291521  |
| NM_000384    | APOB    | 944   | 1004  | 3.06596291521  |
| NM_000384    | APOB    | 4984  | 5030  | 2.74403481277  |
| NM_000384    | APOB    | 11150 | 11193 | 0.740017220146 |
| NM_000384    | APOB    | 7295  | 7331  | 2.91395958584  |
| NM_000384    | APOB    | 1629  | 1661  | 1.74001722015  |
| NM_000384    | APOB    | 9973  | 10018 | 3.20346643896  |
| NM_000384    | APOB    | 1303  | 1353  | 3.74403482032  |
| NM_000384    | APOB    | 5732  | 5771  | 2.91395309071  |
| NM_000384    | APOB    | 10512 | 10552 | 3.44447453846  |
| NM_000384    | APOB    | 1687  | 1730  | 2.06578916489  |
| NM_000384    | APOB    | 8137  | 8179  | 2.06596291521  |
| NM_000384    | APOB    | 12139 | 12186 | 1.74403482031  |
| NM_000384    | APOB    | 2224  | 2357  | 3.44447453846  |
| NM_000384    | APOB    | 12245 | 12284 | 2.7440348201   |
| NM_000384    | APOB    | 10618 | 10681 | 2.55138974215  |
| NM_000384    | APOB    | 13500 | 13538 | 1.74001722015  |
| NM_000384    | APOB    | 4036  | 4125  | 4.74403482032  |
| NM_000384    | APOB    | 5389  | 5479  | 4.06596291521  |

|           |      |       |       |                 |
|-----------|------|-------|-------|-----------------|
| NM_000384 | APOB | 10735 | 10781 | 0.744034820319  |
| NM_000384 | APOB | 11555 | 11593 | 1.32899708512   |
| NM_000384 | APOB | 9820  | 9885  | 3.32899732104   |
| NM_000384 | APOB | 6384  | 6441  | 2.06596267929   |
| NM_000384 | APOB | 282   | 333   | 3.91395982176   |
| NM_000384 | APOB | 4722  | 4792  | 2.55138974238   |
| NM_000384 | APOB | 8975  | 9011  | 3.06596291498   |
| NM_000384 | APOB | 12299 | 12349 | 0.744028089266  |
| NM_000384 | APOB | 6992  | 7079  | 3.55138974238   |
| NM_000384 | APOB | 8438  | 8473  | 2.55138973483   |
| NM_000384 | APOB | 12759 | 12812 | 1.32899731349   |
| NM_000384 | APOB | 13339 | 13423 | 3.99196233376   |
| NM_000384 | APOB | 4571  | 4622  | 2.32899732103   |
| NM_000384 | APOB | 7097  | 7129  | 2.32882357072   |
| NM_000384 | APOB | 7456  | 7506  | 3.44447453846   |
| NM_000384 | APOB | 6634  | 6672  | 2.06578916489   |
| NM_000384 | APOB | 6539  | 6584  | 1.32899731349   |
| NM_000384 | APOB | 3386  | 3421  | 2.32899058999   |
| NM_000384 | APOB | 6848  | 6882  | 1.32899731349   |
| NM_000384 | APOB | 13269 | 13332 | 2.55138974215   |
| NM_000384 | APOB | 2422  | 2454  | 1.98182370582   |
| NM_000384 | APOB | 2142  | 2222  | 2.55138974238   |
| NM_000384 | APOB | 5036  | 5085  | 1.74403481277   |
| NM_000384 | APOB | 8884  | 8924  | 1.32899708512   |
| NM_000384 | APOB | 7842  | 7889  | 1.32497972087   |
| NM_000384 | APOB | 14041 | 14070 | 0.744034584401  |
| NM_000384 | APOB | 12687 | 12754 | 2.32899732104   |
| NM_000384 | APOB | 3612  | 3683  | 3.91395982176   |
| NM_000384 | APOB | 5212  | 5241  | 1.32899058999   |
| NM_000384 | APOB | 8202  | 8268  | 1.32899732103   |
| NM_000384 | APOB | 7896  | 7936  | 0.659895610935  |
| NM_000384 | APOB | 3779  | 3812  | -0.255971910734 |
| NM_000384 | APOB | 8810  | 8881  | 3.20346643896   |
| NM_000384 | APOB | 6057  | 6210  | 5.44447453846   |
| NM_000384 | APOB | 1076  | 1155  | 2.91395982176   |
| NM_000384 | APOB | 11952 | 12053 | 3.83149766157   |
| NM_000384 | APOB | 3686  | 3770  | 3.91395982176   |
| NM_000384 | APOB | 7936  | 7976  | -0.340104389065 |
| NM_000384 | APOB | 4910  | 4949  | 0.744034820097  |
| NM_000384 | APOB | 9444  | 9500  | 1.7440345844    |
| NM_000384 | APOB | 11614 | 11692 | 2.32899732104   |
| NM_000384 | APOB | 10309 | 10397 | 2.74403482032   |
| NM_000384 | APOB | 9327  | 9406  | 0.74403481277   |
| NM_000384 | APOB | 7196  | 7224  | 1.65989561094   |
| NM_000384 | APOB | 9096  | 9171  | 2.32899732104   |
| NM_000384 | APOB | 4493  | 4543  | 2.55121599206   |
| NM_000384 | APOB | 5522  | 5617  | 4.55138974238   |
| NM_000384 | APOB | 12555 | 12681 | 4.44447453846   |
| NM_000384 | APOB | 4144  | 4211  | 2.91395958584   |
| NM_000384 | APOB | 3072  | 3194  | 3.74403482032   |



|           |       |       |       |                |
|-----------|-------|-------|-------|----------------|
| NM_000384 | APOB  | 3321  | 3385  | 2.91395982176  |
| NM_000384 | APOB  | 4798  | 4879  | 3.55138974238  |
| NM_000384 | APOB  | 2564  | 2669  | 3.44447453846  |
| NM_000384 | APOB  | 9541  | 9624  | 2.91395982176  |
| NM_000384 | APOB  | 5310  | 5383  | 2.55138974238  |
| NM_000384 | APOB  | 1757  | 1831  | 3.06596291521  |
| NM_000384 | APOB  | 2459  | 2546  | 3.32899732104  |
| NM_000384 | APOB  | 8621  | 8652  | 0.743861070001 |
| NM_000384 | APOB  | 7987  | 8027  | 0.659895610935 |
| NM_000384 | APOB  | 3520  | 3601  | 2.74403482032  |
| NM_000384 | APOB  | 3195  | 3319  | 4.55138974238  |
| NM_000384 | APOB  | 4276  | 4373  | 4.55138974238  |
| NM_000384 | APOB  | 10949 | 11065 | 3.20346643896  |
| NM_000384 | APOB  | 651   | 770   | 4.26759677638  |
| NM_000384 | APOB  | 13635 | 13764 | 3.44447453846  |
| NM_000384 | APOB  | 1535  | 1617  | 3.65092541593  |
| NM_000384 | APOB  | 2702  | 2820  | 4.55138974238  |
| NM_000384 | APOB  | 1865  | 2085  | 4.83149766157  |
| NM_000384 | APOB  | 820   | 896   | 3.06596291521  |
| NM_000384 | APOB  | 11693 | 11807 | 4.20346643896  |
| NM_000384 | APOB  | 5803  | 5887  | 3.99196233376  |
| NM_000384 | APOB  | 1442  | 1529  | 3.83149766157  |
| NM_000384 | APOB  | 7684  | 7826  | 4.38789101009  |
| NM_000384 | APOB  | 503   | 599   | 3.06596291521  |
| NM_000384 | APOB  | 11859 | 11942 | 2.06194531503  |
| NM_003878 | GGH   | 1346  | 1397  | 5.93520599543  |
| NM_173569 | UBN2  | 13585 | 13604 | 8.1774944447   |
| NM_025195 | TRIB1 | 914   | 933   | 8.2232890009   |
| NM_003380 | VIM   | 1235  | 1275  | 11.2623066153  |
| NM_003380 | VIM   | 1041  | 1079  | 10.4143094804  |
| NM_003380 | VIM   | 1722  | 1770  | 10.0923816214  |
| NM_003380 | VIM   | 629   | 676   | 8.09237489037  |
| NM_003234 | TFRC  | 2408  | 2440  | 5.23431739148  |
| NM_003234 | TFRC  | 1990  | 2051  | 6.16031681004  |
| NM_003234 | TFRC  | 382   | 441   | 4.49735179732  |
| NM_003234 | TFRC  | 1156  | 1214  | 5.99985213785  |
| NM_003234 | TFRC  | 1444  | 1514  | 5.23431739148  |
| NM_003234 | TFRC  | 2582  | 2664  | 4.49735179732  |
| NM_003234 | TFRC  | 1125  | 1148  | 1.82825008721  |
| NM_003234 | TFRC  | 2530  | 2570  | 3.49735178977  |
| NM_003234 | TFRC  | 1023  | 1082  | 5.49735179732  |
| NM_003234 | TFRC  | 1232  | 1442  | 7.19779151546  |
| NM_003234 | TFRC  | 2054  | 2125  | 5.8192798922   |
| NM_003234 | TFRC  | 2369  | 2403  | 4.49735179731  |
| NM_003234 | TFRC  | 247   | 297   | 3.82825008721  |
| NM_003234 | TFRC  | 817   | 948   | 6.43595125265  |
| NM_003234 | TFRC  | 8     | 38    | 1.82825008721  |
| NM_003234 | TFRC  | 1617  | 1694  | 6.95678341595  |
| NM_003234 | TFRC  | 463   | 600   | 6.86658560698  |
| NM_003234 | TFRC  | 1515  | 1569  | 5.8192798922   |

|              |        |      |      |               |
|--------------|--------|------|------|---------------|
| NM_003234    | TFRC   | 2474 | 2514 | 4.1501781821  |
| NM_003234    | TFRC   | 621  | 784  | 5.91238929659 |
| NM_003234    | TFRC   | 2167 | 2358 | 7.12184266222 |
| NM_001100400 | PDS5A  | 370  | 401  | 7.56852223704 |
| NM_001195731 | CHPF   | 1109 | 1149 | 5.48335846312 |
| NM_014053    | FLVCR1 | 1393 | 1416 | 9.75907264753 |
| NM_014053    | FLVCR1 | 502  | 547  | 8.67510718847 |
| NM_014506    | TOR1B  | 722  | 749  | 7.15773581607 |
| NM_014505    | KCNMB4 | 339  | 370  | 10.0824547815 |
| NM_003667    | LGR5   | 1851 | 1893 | 8.96211933985 |
| NM_003129    | SQLE   | 2171 | 2206 | 3.9558137834  |
| NM_003129    | SQLE   | 1386 | 1427 | 6.45663707474 |
| NM_003129    | SQLE   | 1717 | 1742 | 5.53675868395 |
| NM_003128    | SPTBN1 | 1393 | 1490 | 4.93020094105 |
| NM_003128    | SPTBN1 | 2708 | 2797 | 3.55168931757 |
| NM_003128    | SPTBN1 | 5597 | 5670 | 4.03694239465 |
| NM_003128    | SPTBN1 | 1212 | 1272 | 4.03309854479 |
| NM_003128    | SPTBN1 | 6613 | 6701 | 3.81454997331 |
| NM_003128    | SPTBN1 | 6479 | 6520 | 2.22958747259 |
| NM_003128    | SPTBN1 | 6957 | 7040 | 5.03711614496 |
| NM_003128    | SPTBN1 | 1924 | 1957 | 3.81070612345 |
| NM_003128    | SPTBN1 | 3349 | 3406 | 3.55168931779 |
| NM_003128    | SPTBN1 | 6374 | 6416 | 3.22975449185 |
| NM_003128    | SPTBN1 | 6223 | 6293 | 3.2297612229  |
| NM_003128    | SPTBN1 | 3660 | 3711 | 3.22574362273 |
| NM_003128    | SPTBN1 | 5066 | 5128 | 3.22976098699 |
| NM_003128    | SPTBN1 | 5425 | 5456 | 2.14562201352 |
| NM_003128    | SPTBN1 | 2599 | 2629 | 1.14562201352 |
| NM_003128    | SPTBN1 | 884  | 922  | 3.81472371608 |
| NM_003128    | SPTBN1 | 3230 | 3284 | 2.81454997331 |
| NM_003128    | SPTBN1 | 4497 | 4551 | 4.55151556748 |
| NM_003128    | SPTBN1 | 5143 | 5192 | 3.81471699257 |
| NM_003128    | SPTBN1 | 3921 | 3971 | 4.55168908188 |
| NM_003128    | SPTBN1 | 7115 | 7186 | 4.39968598843 |
| NM_003128    | SPTBN1 | 975  | 1035 | 3.55168931757 |
| NM_003128    | SPTBN1 | 1865 | 1917 | 2.81472371608 |
| NM_003128    | SPTBN1 | 4775 | 4843 | 4.81472372363 |
| NM_003128    | SPTBN1 | 2810 | 2865 | 4.3996862168  |
| NM_003128    | SPTBN1 | 2053 | 2122 | 2.81472348771 |
| NM_003128    | SPTBN1 | 454  | 518  | 2.81472372341 |
| NM_003128    | SPTBN1 | 727  | 773  | 2.81070612345 |
| NM_003128    | SPTBN1 | 3014 | 3064 | 3.54767171762 |
| NM_003128    | SPTBN1 | 4704 | 4757 | 3.22976098699 |
| NM_003128    | SPTBN1 | 5522 | 5595 | 2.81471699257 |
| NM_003128    | SPTBN1 | 1097 | 1145 | 3.14562201352 |
| NM_003128    | SPTBN1 | 587  | 651  | 2.14562201352 |
| NM_003128    | SPTBN1 | 5989 | 6027 | 1.14562201352 |
| NM_003128    | SPTBN1 | 3528 | 3637 | 5.22976122291 |
| NM_003128    | SPTBN1 | 6705 | 6798 | 4.68919284154 |
| NM_003128    | SPTBN1 | 4137 | 4176 | 2.81070612345 |

|              |         |      |      |                |
|--------------|---------|------|------|----------------|
| NM_003128    | SPTBN1  | 3973 | 4078 | 4.22976122291  |
| NM_003128    | SPTBN1  | 5358 | 5409 | 4.22976122268  |
| NM_003128    | SPTBN1  | 1736 | 1852 | 4.03711614496  |
| NM_003128    | SPTBN1  | 2506 | 2578 | 4.39968622434  |
| NM_003128    | SPTBN1  | 2196 | 2383 | 5.47768873635  |
| NM_021991    | JUP     | 1317 | 1351 | 8.23229340009  |
| NM_003123    | SPN     | 2675 | 2708 | 10.9257560047  |
| NM_003123    | SPN     | 2903 | 2927 | 12.0058776139  |
| NM_001035267 | RPL41   | 318  | 460  | 2.08078068731  |
| NM_003655    | CBX4    | 51   | 75   | 4.11612416442  |
| NM_001007561 | IRGQ    | 1411 | 1445 | 11.551140872   |
| NM_002835    | PTPN12  | 642  | 743  | 6.241559202    |
| NM_002381    | MATN3   | 961  | 1017 | 6.32446865212  |
| NM_001204306 | GC      | 891  | 1756 | 20.550750149   |
| NM_001204306 | GC      | 175  | 887  | 20.0841301994  |
| NM_005381    | NCL     | 2019 | 2076 | 2.3722334564   |
| NM_005381    | NCL     | 696  | 761  | 0.202301723903 |
| NM_005381    | NCL     | 855  | 942  | 0.202308454734 |
| NM_005389    | PCMT1   | 491  | 524  | 5.60853032959  |
| NM_032204    | ASCC2   | 1333 | 1355 | 7.42678753445  |
| NM_032204    | ASCC2   | 68   | 100  | 6.84584263368  |
| NM_001202439 | B7H6    | 657  | 699  | 11.1532506425  |
| NM_004240    | TRIP10  | 14   | 38   | 3.20758512615  |
| NM_000943    | PPIC    | 690  | 741  | 8.71355742367  |
| NM_002526    | NT5E    | 776  | 820  | 7.36431280987  |
| NM_002526    | NT5E    | 1037 | 1082 | 7.36431280987  |
| NM_002526    | NT5E    | 2097 | 2124 | 7.36832367899  |
| NM_002526    | NT5E    | 914  | 978  | 8.36832367899  |
| NM_001144012 | TMX2    | 511  | 592  | 7.51729314636  |
| NM_001144012 | TMX2    | 670  | 743  | 6.66929600388  |
| NM_001144012 | TMX2    | 410  | 465  | 6.66912248948  |
| NM_001144012 | TMX2    | 783  | 821  | 6.26322893553  |
| NM_001144012 | TMX2    | 217  | 311  | 4.34736814491  |
| NM_002824    | PTMS    | 132  | 158  | 5.44257616531  |
| NM_015012    | TMEM41B | 773  | 822  | 8.36277941567  |
| NM_015012    | TMEM41B | 1128 | 1155 | 9.36277941567  |
| NM_001014975 | CFH     | 953  | 1006 | 10.494259161   |
| NM_001014975 | CFH     | 1169 | 1217 | 13.4982767612  |
| NM_001014975 | CFH     | 742  | 841  | 13.8202046201  |
| NM_001014975 | CFH     | 1467 | 1507 | 12.8202046201  |
| NM_134433    | RFX2    | 3167 | 3186 | 12.8799609189  |
| NM_030782    | CLPTM1L | 816  | 883  | 4.95713448495  |
| NM_017733    | PIGG    | 1646 | 1730 | 9.963725731    |
| NM_017733    | PIGG    | 1064 | 1107 | 8.73732244055  |
| NM_017733    | PIGG    | 1279 | 1319 | 9.15235993982  |
| NM_003580    | NSMAF   | 150  | 177  | 6.89401680257  |
| NM_001002860 | BTBD7   | 133  | 160  | 9.57053798413  |
| NM_001146082 | MBOAT7  | 1056 | 1106 | 10.3072674406  |
| NM_001146082 | MBOAT7  | 480  | 569  | 9.30325007631  |
| NM_001146082 | MBOAT7  | 1147 | 1174 | 9.2231284671   |

|              |          |       |       |                   |
|--------------|----------|-------|-------|-------------------|
| NM_001146082 | MBOAT7   | 614   | 664   | 9.30709392616     |
| NM_004362    | CLGN     | 1097  | 1173  | 6.41938366779     |
| NM_004362    | CLGN     | 562   | 595   | 6.41938366025     |
| NM_004362    | CLGN     | 186   | 227   | 6.09728182259     |
| NM_004362    | CLGN     | 322   | 368   | 6.41938366757     |
| NM_004362    | CLGN     | 1675  | 1725  | 7.47274798216     |
| NM_004362    | CLGN     | 448   | 478   | 4.09744884185     |
| NM_004362    | CLGN     | 405   | 443   | 6.09343797273     |
| NM_004362    | CLGN     | 1061  | 1088  | 5.01331636352     |
| NM_004362    | CLGN     | 1183  | 1216  | 5.59827886424     |
| NM_004360    | CDH1     | 2592  | 2626  | 8.07194469089     |
| NM_004360    | CDH1     | 2462  | 2511  | 7.74617274615     |
| NM_004360    | CDH1     | 1300  | 1336  | 7.66605113694     |
| NM_004360    | CDH1     | 2146  | 2214  | 8.75019034632     |
| NM_004360    | CDH1     | 1738  | 1794  | 9.55754526838     |
| NM_004360    | CDH1     | 742   | 805   | 8.55754526083     |
| NM_004360    | CDH1     | 2394  | 2439  | 8.07211844099     |
| NM_004360    | CDH1     | 978   | 1016  | 8.33515283949     |
| NM_004360    | CDH1     | 1590  | 1634  | 9.20961523391     |
| NM_004360    | CDH1     | 2680  | 2732  | 7.25101363766     |
| NM_004360    | CDH1     | 2543  | 2587  | 5.74617274615     |
| NM_004360    | CDH1     | 2278  | 2322  | 7.66605113694     |
| NM_004360    | CDH1     | 838   | 920   | 8.06810084104     |
| NM_004367    | CCR6     | 1064  | 1098  | 7.62014485401     |
| NM_004367    | CCR6     | 1281  | 1319  | 9.93822909905     |
| NM_004364    | CEBPA    | 1985  | 2037  | 7.20034718651     |
| NM_004364    | CEBPA    | 442   | 470   | 6.78548343755     |
| NM_004364    | CEBPA    | 499   | 520   | 6.11638172745     |
| NM_000263    | NAGLU    | 1347  | 1403  | 9.55569841756     |
| NM_000263    | NAGLU    | 97    | 117   | 8.66420428612     |
| NM_000263    | NAGLU    | 1926  | 1971  | 10.0702715904     |
| NM_000263    | NAGLU    | 794   | 825   | 9.07009784007     |
| NM_133378    | TTN      | 56112 | 56131 | 15.5425449675     |
| NM_003461    | ZYX      | 158   | 223   | 8.23223285493     |
| NM_003468    | FZD5     | 634   | 685   | 6.84057488389     |
| NM_003468    | FZD5     | 1222  | 1287  | 8.64792980594     |
| NM_003468    | FZD5     | 1329  | 1373  | 7.42537036534     |
| NM_003468    | FZD5     | 1709  | 1782  | 7.75644240556     |
| NM_003468    | FZD5     | 1574  | 1655  | 8.42553738461     |
| NM_025076    | UXS1     | 1329  | 1370  | 3.4624245432      |
| NM_025076    | UXS1     | 349   | 447   | 3.88147940673     |
| NM_025072    | PTGES2   | 2188  | 2221  | 7.52818904492     |
| NM_024650    | C11orf80 |       | 77    | 116 10.3174071242 |
| NM_024656    | GLT25D1  | 289   | 336   | 7.57085870327     |
| NM_024656    | GLT25D1  | 996   | 1049  | 7.39195677576     |
| NM_024656    | GLT25D1  | 388   | 435   | 7.38794590664     |
| NM_024656    | GLT25D1  | 1486  | 1522  | 7.87739033399     |
| NM_024656    | GLT25D1  | 3104  | 3166  | 6.6549911816      |
| NM_024656    | GLT25D1  | 1344  | 1395  | 8.65499791243     |
| NM_024656    | GLT25D1  | 1809  | 1854  | 7.65098031248     |

|              |           |      |      |                |               |
|--------------|-----------|------|------|----------------|---------------|
| NM_024656    | GLT25D1   | 3474 | 3540 | 6.06601781176  |               |
| NM_024656    | GLT25D1   | 1260 | 1298 | 7.06986166161  |               |
| NM_024656    | GLT25D1   | 472  | 561  | 7.65499791265  |               |
| NM_024656    | GLT25D1   | 1696 | 1777 | 7.65499791265  |               |
| NM_001136137 | RPL28     | 162  | 203  | 1.58775569989  |               |
| NM_001136137 | RPL28     | 58   | 83   | -1.30373843133 |               |
| NM_178549    | ZNF678    | 6258 | 6279 | 11.2821618051  |               |
| NM_015245    | ANKS1A    | 261  | 300  | 6.37009987345  |               |
| NM_018368    | LMBRD1    | 957  | 986  | 3.81415977137  |               |
| NM_018368    | LMBRD1    | 589  | 649  | 7.27376514032  |               |
| NM_018368    | LMBRD1    | 517  | 576  | 7.90179635538  |               |
| NM_018368    | LMBRD1    | 1818 | 1897 | 6.98425852313  |               |
| NM_018368    | LMBRD1    | 1037 | 1069 | 3.7301943123   |               |
| NM_018368    | LMBRD1    | 850  | 904  | 6.39928929135  |               |
| NM_018368    | LMBRD1    | 687  | 771  | 6.62168844374  |               |
| NM_018368    | LMBRD1    | 265  | 345  | 3.81432679063  |               |
| NM_019015    | CHPF2     | 3159 | 3212 | 8.21317778122  |               |
| NM_006996    | SLC19A2   | 226  | 258  | 9.80329832416  |               |
| NM_022892    | NAIP      | 210  | 230  | 9.90071554923  |               |
| NM_001143958 | TMEM30A   | 1024 | 1055 | 10.0441321934  |               |
| NM_001143958 | TMEM30A   | 1072 | 1126 | 9.95102278903  |               |
| NM_001143958 | TMEM30A   | 759  | 813  | 6.04011459325  |               |
| NM_001143958 | TMEM30A   | 1150 | 1198 | 9.95102278148  |               |
| NM_001143958 | TMEM30A   | 929  | 963  | 9.04413219341  |               |
| NM_001143958 | TMEM30A   | 287  | 324  | 7.95999298404  |               |
| NM_001143958 | TMEM30A   | 531  | 555  | 6.04011459325  |               |
| NM_001143958 | TMEM30A   | 2706 | 2728 | 6.95999298404  |               |
| NM_016639    | TNFRSF12A |      | 355  | 399            | 7.94934073513 |
| NM_016639    | TNFRSF12A |      | 418  | 468            | 7.94532337087 |
| NM_016639    | TNFRSF12A |      | 208  | 259            | 8.75267829293 |
| NM_053039    | UGT2B28   | 1042 | 1077 | 7.5807408179   |               |
| NM_053039    | UGT2B28   | 999  | 1024 | 8.58475168702  |               |
| NM_030641    | APOL6     | 2751 | 2771 | 9.05666518525  |               |
| NM_003818    | CDS2      | 852  | 889  | 5.18692754813  |               |
| NM_003816    | ADAM9     | 836  | 893  | 6.80910210919  |               |
| NM_003816    | ADAM9     | 1336 | 1375 | 5.80910210919  |               |
| NM_003816    | ADAM9     | 450  | 499  | 6.48717401429  |               |
| NM_003816    | ADAM9     | 698  | 816  | 7.29452893636  |               |
| NM_003816    | ADAM9     | 980  | 1041 | 5.40303480491  |               |
| NM_003816    | ADAM9     | 2210 | 2261 | 6.48717400675  |               |
| NM_003816    | ADAM9     | 1759 | 1804 | 4.40303480491  |               |
| NM_003816    | ADAM9     | 25   | 65   | 4.40303480491  |               |
| NM_003816    | ADAM9     | 1939 | 2027 | 7.18761373244  |               |
| NM_003816    | ADAM9     | 2104 | 2182 | 6.29452893636  |               |
| NM_003816    | ADAM9     | 1147 | 1184 | 5.80508450901  |               |
| NM_003816    | ADAM9     | 1377 | 1491 | 7.4871740143   |               |
| NM_003816    | ADAM9     | 1066 | 1124 | 5.80909537813  |               |
| NM_003810    | TNFSF10   | 162  | 236  | 6.9697263323   |               |
| NM_004289    | NFE2L3    | 274  | 311  | 7.13683098272  |               |
| NM_004289    | NFE2L3    | 1840 | 1883 | 7.05670937351  |               |

|              |         |       |       |               |
|--------------|---------|-------|-------|---------------|
| NM_004285    | H6PD    | 8485  | 8558  | 9.39728470278 |
| NM_001671    | ASGR1   | 553   | 601   | 2.38198028228 |
| NM_001671    | ASGR1   | 781   | 815   | 2.87713939077 |
| NM_001671    | ASGR1   | 425   | 454   | 3.68833816268 |
| NM_001671    | ASGR1   | 892   | 989   | 4.46611949166 |
| NM_001671    | ASGR1   | 1043  | 1249  | 5.404718947   |
| NM_001677    | ATP1B1  | 465   | 625   | 8.06708283598 |
| NM_001677    | ATP1B1  | 77    | 118   | 5.43149426219 |
| NM_001677    | ATP1B1  | 990   | 1034  | 4.79406434158 |
| NM_001677    | ATP1B1  | 1225  | 1290  | 3.86192822564 |
| NM_001677    | ATP1B1  | 359   | 455   | 5.53102993574 |
| NM_001677    | ATP1B1  | 265   | 307   | 4.42747666202 |
| NM_001677    | ATP1B1  | 180   | 218   | 4.62413933991 |
| NM_001677    | ATP1B1  | 1766  | 1801  | 1.54000013075 |
| NM_001677    | ATP1B1  | 913   | 987   | 6.08357095877 |
| NM_001677    | ATP1B1  | 738   | 886   | 7.3790268423  |
| NM_020765    | UBR4    | 13892 | 13917 | 7.04118153737 |
| NM_000108    | DLD     | 1502  | 1563  | 3.84664276061 |
| NM_024006    | VKORC1  | 641   | 691   | 6.65226138498 |
| NM_024006    | VKORC1  | 522   | 640   | 9.49128809653 |
| NM_024003    | L1CAM   | 2501  | 2563  | 12.848045952  |
| NM_024003    | L1CAM   | 2298  | 2347  | 11.8482197023 |
| NM_024003    | L1CAM   | 990   | 1042  | 11.4291646029 |
| NM_024003    | L1CAM   | 4635  | 4694  | 12.6554008741 |
| NM_024003    | L1CAM   | 1366  | 1422  | 12.1699740469 |
| NM_024003    | L1CAM   | 1252  | 1292  | 10.7640804929 |
| NM_024003    | L1CAM   | 1761  | 1806  | 12.571435415  |
| NM_024003    | L1CAM   | 1998  | 2055  | 10.8442021021 |
| NM_024003    | L1CAM   | 1475  | 1566  | 12.6555746244 |
| NM_024003    | L1CAM   | 608   | 680   | 12.1699740469 |
| NM_024003    | L1CAM   | 66    | 155   | 13.1701477972 |
| NM_173542    | PLBD2   | 1417  | 1487  | 9.43904663085 |
| NM_173542    | PLBD2   | 970   | 1009  | 9.03699692675 |
| NM_173542    | PLBD2   | 1160  | 1193  | 9.11711853597 |
| NM_173542    | PLBD2   | 1030  | 1077  | 8.03699692675 |
| NM_173542    | PLBD2   | 687   | 733   | 9.70208103669 |
| NM_001146277 | NCEH1   | 1215  | 1289  | 10.0553800532 |
| NM_006280    | SSR4    | 504   | 564   | 9.24532330625 |
| NM_006280    | SSR4    | 224   | 373   | 10.3708541883 |
| NM_005410    | SEPP1   | 214   | 272   | 4.54314405635 |
| NM_005415    | SLC20A1 | 1676  | 1714  | 5.89463176144 |
| NM_005415    | SLC20A1 | 791   | 842   | 6.39380846988 |
| NM_005415    | SLC20A1 | 2409  | 2481  | 6.71573656499 |
| NM_005415    | SLC20A1 | 1183  | 1228  | 6.97475337065 |
| NM_003107    | S0X4    | 1977  | 2014  | 13.3133011458 |
| NM_003107    | S0X4    | 1683  | 1732  | 13.3092835532 |
| NM_003107    | S0X4    | 509   | 558   | 12.9072338491 |
| NM_003105    | S0RL1   | 4730  | 4794  | 4.3949094008  |
| NM_003101    | S0AT1   | 1640  | 1692  | 9.12763507937 |
| NM_003101    | S0AT1   | 1035  | 1063  | 7.45853337682 |

|              |          |      |      |                    |
|--------------|----------|------|------|--------------------|
| NM_003101    | SOAT1    | 1580 | 1614 | 6.53865498603      |
| NM_003101    | SOAT1    | 1716 | 1771 | 10.2431123043      |
| NM_003101    | SOAT1    | 1441 | 1546 | 8.86460068109      |
| NM_006237    | POU4F1   | 742  | 766  | 11.5872921737      |
| NM_015658    | NOC2L    | 2139 | 2197 | 5.23306204408      |
| NM_015388    | YIPF3    | 1075 | 1131 | 7.61578541114      |
| NM_015388    | YIPF3    | 790  | 858  | 8.02697906057      |
| NM_015388    | YIPF3    | 657  | 707  | 7.35292451971      |
| NM_015388    | YIPF3    | 917  | 1032 | 8.20092166218      |
| NM_001034116 | EIF2B4   | 383  | 403  | 7.07158597253      |
| NM_002508    | NID1     | 3333 | 3377 | 4.65147388508      |
| NM_002508    | NID1     | 410  | 461  | 5.56733467592      |
| NM_002508    | NID1     | 3804 | 3845 | 3.65146715425      |
| NM_002508    | NID1     | 2333 | 2374 | 6.45882880736      |
| NM_002508    | NID1     | 2706 | 2739 | 4.65130013498      |
| NM_002508    | NID1     | 112  | 162  | 5.23241878585      |
| NM_002508    | NID1     | 915  | 1029 | 7.40636138746      |
| NM_002508    | NID1     | 1444 | 1488 | 4.65130013498      |
| NM_002508    | NID1     | 3036 | 3114 | 6.89940139874      |
| NM_002508    | NID1     | 1713 | 1795 | 4.65147387775      |
| NM_002508    | NID1     | 2196 | 2257 | 5.2364361501       |
| NM_002508    | NID1     | 1248 | 1286 | 4.65146715425      |
| NM_002508    | NID1     | 3673 | 3701 | 2.56733467592      |
| NM_002508    | NID1     | 2120 | 2166 | 2.64745628513      |
| NM_002508    | NID1     | 3382 | 3460 | 5.45882880736      |
| NM_002508    | NID1     | 2526 | 2583 | 4.23642965497      |
| NM_002508    | NID1     | 3154 | 3313 | 6.82139888674      |
| NM_002508    | NID1     | 1578 | 1687 | 6.35191360344      |
| NM_002508    | NID1     | 3566 | 3644 | 6.23643638602      |
| NM_001039457 | ATP6V0B  | 474  | 549  | 9.95589152735      |
| NM_001039457 | ATP6V0B  | 320  | 374  | 9.37092879071      |
| NM_001923    | DDB1     | 3324 | 3401 | 4.8924965115       |
| NM_001923    | DDB1     | 1895 | 1943 | 4.81237490229      |
| NM_018009    | TAPBPL   | 1214 | 1242 | 9.695984412        |
| NM_015033    | FNBP1    | 2316 | 2338 | 5.42681200905      |
| NM_030810    | TXNDC5   | 455  | 558  | 4.76495715458      |
| NM_030810    | TXNDC5   | 380  | 429  | 2.54256473325      |
| NM_030810    | TXNDC5   | 870  | 990  | 5.04506507378      |
| NM_030810    | TXNDC5   | 719  | 766  | 2.45842552386      |
| NM_030810    | TXNDC5   | 275  | 358  | 4.27953032741      |
| NM_030810    | TXNDC5   | 769  | 811  | 1.95760222498      |
| NM_030810    | TXNDC5   | 1057 | 1211 | 5.91179854291      |
| NM_001134492 | HS2ST1   | 965  | 1031 | 8.66106583693      |
| NM_001009184 | GRINA    | 767  | 831  | 5.94341367919      |
| NM_001085    | SERPINA3 |      | 1093 | 1141 2.2742249582  |
| NM_001085    | SERPINA3 |      | 1149 | 1202 5.27439870851 |
| NM_001085    | SERPINA3 |      | 645  | 687 4.85936120923  |
| NM_001085    | SERPINA3 |      | 1023 | 1074 4.2742249582  |
| NM_001089    | ABCA3    | 2255 | 2296 | 14.572841431       |
| NM_001089    | ABCA3    | 2034 | 2081 | 13.8318584726      |

|              |          |      |      |                   |
|--------------|----------|------|------|-------------------|
| NM_213647    | FGFR4    | 251  | 307  | 7.24410937777     |
| NM_213647    | FGFR4    | 2262 | 2299 | 6.74493267665     |
| NM_213647    | FGFR4    | 2103 | 2134 | 5.15997017593     |
| NM_213647    | FGFR4    | 1173 | 1227 | 7.56201988003     |
| NM_213647    | FGFR4    | 1359 | 1426 | 9.15099998093     |
| NM_213647    | FGFR4    | 411  | 457  | 5.2441091494      |
| NM_213647    | FGFR4    | 1807 | 1836 | 5.15997017593     |
| NM_017712    | PGPEP1   | 1623 | 1665 | 7.18806496947     |
| NM_001032367 | SPINT1   | 1537 | 1586 | 12.1052905381     |
| NM_001032367 | SPINT1   | 398  | 461  | 10.8828981168     |
| NM_001032367 | SPINT1   | 1219 | 1264 | 11.6198639466     |
| NM_001032367 | SPINT1   | 684  | 764  | 10.2939182518     |
| NM_001032367 | SPINT1   | 1377 | 1433 | 12.8828983527     |
| NM_001032367 | SPINT1   | 1153 | 1205 | 10.8828983451     |
| NM_001032367 | SPINT1   | 941  | 1025 | 11.6198639469     |
| NM_001889    | CRYZ     | 1858 | 1878 | 6.12645799896     |
| NM_001100165 | PHACTR2  | 7903 | 7923 | 7.02641552093     |
| NM_000196    | HSD11B2  | 54   | 77   | 9.61274325572     |
| NM_001134232 | TMEM106B |      | 930  | 972 8.85298386001 |
| NM_001134232 | TMEM106B |      | 833  | 862 7.04546191869 |
| NM_004343    | CALR     | 142  | 199  | 4.94628039987     |
| NM_004343    | CALR     | 1319 | 1377 | 2.8308031749      |
| NM_004343    | CALR     | 1580 | 1619 | 1.24182308155     |
| NM_004343    | CALR     | 303  | 352  | 3.05319536787     |
| NM_004343    | CALR     | 364  | 505  | 5.73769377806     |
| NM_004343    | CALR     | 942  | 1072 | 5.41576568317     |
| NM_004343    | CALR     | 205  | 285  | 3.24584068173     |
| NM_004343    | CALR     | 1077 | 1316 | 6.47465937222     |
| NM_004343    | CALR     | 1396 | 1490 | 3.24584068173     |
| NM_004343    | CALR     | 1793 | 1871 | 3.24583395067     |
| NM_004343    | CALR     | 513  | 890  | 7.74568656881     |
| NM_004616    | TSPAN8   | 508  | 552  | 12.7708317223     |
| NM_004616    | TSPAN8   | 806  | 844  | 11.7708317223     |
| NM_004617    | TM4SF4   | 431  | 624  | 15.3880580059     |
| NM_004617    | TM4SF4   | 901  | 973  | 12.1785979092     |
| NM_004617    | TM4SF4   | 744  | 901  | 13.82246083       |
| NM_004615    | TSPAN7   | 463  | 509  | 6.15339525948     |
| NM_001142450 | SPNS1    | 1217 | 1259 | 8.80119238591     |
| NM_001142450 | SPNS1    | 1807 | 1845 | 5.90969849039     |
| NM_001142450 | SPNS1    | 1065 | 1139 | 7.99383769977     |
| NM_001142450 | SPNS1    | 916  | 966  | 8.99383769977     |
| NM_134428    | RFX3     | 45   | 75   | 7.91374197911     |
| NM_001037290 | BC02     | 1660 | 1680 | 11.5233765239     |
| NM_020531    | C20orf3  | 802  | 835  | 6.10754373764     |
| NM_020531    | C20orf3  | 759  | 800  | 6.10754373764     |
| NM_020531    | C20orf3  | 1233 | 1280 | 5.68848863819     |
| NM_020531    | C20orf3  | 959  | 1016 | 6.27746873909     |
| NM_020531    | C20orf3  | 1148 | 1231 | 6.10754373764     |
| NM_172209    | TAPBP    | 919  | 952  | 11.785525348      |
| NM_172209    | TAPBP    | 590  | 644  | 10.6480285553     |



|              |          |      |      |                    |
|--------------|----------|------|------|--------------------|
| NM_172209    | TAPBP    | 795  | 838  | 9.32208286025      |
| NM_172209    | TAPBP    | 1223 | 1276 | 8.32208286025      |
| NM_172209    | TAPBP    | 1137 | 1184 | 8.32592671011      |
| NM_000821    | GGCX     | 630  | 678  | 8.58360818388      |
| NM_000821    | GGCX     | 1691 | 1742 | 7.41367645138      |
| NM_000821    | GGCX     | 2174 | 2224 | 7.99847193284      |
| NM_000821    | GGCX     | 1252 | 1314 | 7.99864544724      |
| NM_000821    | GGCX     | 697  | 736  | 7.99462808298      |
| NM_000821    | GGCX     | 2096 | 2132 | 6.99847193284      |
| NM_000821    | GGCX     | 742  | 845  | 7.99864568316      |
| NM_000821    | GGCX     | 1775 | 1832 | 7.41368318243      |
| NM_001136562 | AKAP2    | 1613 | 1633 | 7.73258471755      |
| NM_006612    | KIF1C    | 2049 | 2126 | 6.2219005442       |
| NM_001104647 | SLC25A36 |      | 3818 | 3839 5.76634440089 |
| NM_002972    | SBF1     | 2336 | 2433 | 7.23045664032      |
| NM_002972    | SBF1     | 5087 | 5165 | 6.81524539827      |
| NM_031479    | INHBE    | 1212 | 1272 | 8.34250813969      |
| NM_031479    | INHBE    | 962  | 1038 | 8.34250790377      |
| NM_031479    | INHBE    | 1434 | 1488 | 7.60553581447      |
| NM_031479    | INHBE    | 1938 | 2007 | 7.93644083541      |
| NM_031479    | INHBE    | 281  | 318  | 6.93644083541      |
| NM_031479    | INHBE    | 1331 | 1367 | 7.02058003725      |
| NM_031479    | INHBE    | 678  | 778  | 9.82793496686      |
| NM_031479    | INHBE    | 158  | 206  | 7.52140333613      |
| NM_031479    | INHBE    | 789  | 898  | 9.19050504624      |
| NM_001024956 | SC5DL    | 1061 | 1128 | 7.02996263406      |
| NM_031212    | SLC25A28 |      | 238  | 264 7.94175785609  |
| NM_001136153 | ATF6B    | 1538 | 1588 | 8.67469986338      |
| NM_021814    | ELOVL5   | 450  | 514  | 7.74268068198      |
| NM_021814    | ELOVL5   | 579  | 617  | 7.74268068198      |
| NM_021814    | ELOVL5   | 897  | 956  | 8.47981979055      |
| NM_021814    | ELOVL5   | 1152 | 1212 | 8.15789193158      |
| NM_021814    | ELOVL5   | 690  | 876  | 10.2453547728      |
| NM_001961    | EEF2     | 2711 | 2766 | 1.75628652628      |
| NM_001961    | EEF2     | 2091 | 2132 | -0.0550859959398   |
| NM_001961    | EEF2     | 445  | 515  | 2.27085969912      |
| NM_001961    | EEF2     | 1720 | 1790 | 2.27085969912      |
| NM_001961    | EEF2     | 834  | 883  | 1.94893160423      |
| NM_001961    | EEF2     | 1019 | 1068 | 1.75628652629      |
| NM_001961    | EEF2     | 1312 | 1366 | 1.27085296807      |
| NM_001961    | EEF2     | 948  | 1003 | 0.529876504781     |
| NM_001961    | EEF2     | 689  | 739  | 0.948931596684     |
| NM_001961    | EEF2     | 1485 | 1534 | 2.64937132237      |
| NM_001961    | EEF2     | 2887 | 2928 | -0.0550859959398   |
| NM_001961    | EEF2     | 1977 | 2045 | 1.2708596989       |
| NM_001961    | EEF2     | 2145 | 2201 | -0.0550859959398   |
| NM_001961    | EEF2     | 521  | 617  | 2.40836322287      |
| NM_001961    | EEF2     | 2597 | 2699 | 1.53389386904      |
| NM_001961    | EEF2     | 1179 | 1250 | -0.051068395767    |
| NM_001961    | EEF2     | 1791 | 1936 | 2.85582219984      |

|              |          |      |      |                    |
|--------------|----------|------|------|--------------------|
| NM_000995    | RPL34    | 248  | 328  | 0.398417609798     |
| NM_014712    | SETD1A   | 627  | 646  | 7.35596262322      |
| NM_001960    | EEF1D    | 1151 | 1212 | 2.83348663361      |
| NM_014718    | CLSTN3   | 936  | 990  | 7.52269437749      |
| NM_014718    | CLSTN3   | 1717 | 1790 | 7.10765015471      |
| NM_014718    | CLSTN3   | 2360 | 2408 | 6.10765015471      |
| NM_014718    | CLSTN3   | 1875 | 1962 | 7.10363928559      |
| NM_014718    | CLSTN3   | 274  | 350  | 6.51867678487      |
| NM_014718    | CLSTN3   | 1137 | 1353 | 7.98212600368      |
| NM_014718    | CLSTN3   | 1577 | 1646 | 6.10765664984      |
| NM_005996    | TBX3     | 59   | 102  | 8.12946370334      |
| NM_152924    | ABHD2    | 555  | 632  | 9.83418243721      |
| NM_152924    | ABHD2    | 849  | 905  | 8.83418220129      |
| NM_001097620 | TMEM184A |      | 478  | 562 10.2079577959  |
| NM_001097620 | TMEM184A |      | 1366 | 1405 9.53886281681 |
| NM_014345    | ZNF318   | 6762 | 6782 | 5.29713974608      |
| NM_020854    | KIAA1468 |      | 567  | 588 8.87899371033  |
| NM_016657    | KDELR3   | 505  | 540  | 9.60929093973      |
| NM_016657    | KDELR3   | 581  | 611  | 8.52916933052      |
| NM_016657    | KDELR3   | 706  | 739  | 7.60929093973      |
| NM_194463    | RNF128   | 1223 | 1258 | 4.25750948343      |
| NM_194463    | RNF128   | 1057 | 1099 | 4.67254698271      |
| NM_194463    | RNF128   | 1150 | 1200 | 2.66870313285      |
| NM_007138    | ZNF90    | 326  | 350  | 12.91838525        |
| NM_030665    | RAI1     | 6358 | 6377 | 9.76246702416      |
| NM_030666    | SERPINB1 |      | 882  | 931 4.87292602937  |
| NM_015833    | ADARB1   | 19   | 49   | 8.54775967594      |
| NM_020702    | KIAA1161 |      | 1007 | 1034 8.41012676733 |
| NM_000120    | EPHX1    | 1164 | 1215 | 9.25061311513      |
| NM_000120    | EPHX1    | 596  | 632  | 8.5725412098       |
| NM_000120    | EPHX1    | 722  | 747  | 7.16647390575      |
| NM_000120    | EPHX1    | 535  | 574  | 7.25043936481      |
| NM_000120    | EPHX1    | 1370 | 1423 | 9.05395043702      |
| NM_000120    | EPHX1    | 1240 | 1356 | 9.25061311513      |
| NM_144650    | ADHFE1   | 684  | 702  | 10.3809588202      |
| NM_024029    | YIPF2    | 716  | 817  | 8.76999317419      |
| NM_001142622 | GHDC     | 1245 | 1305 | 9.79880106241      |
| NM_001142622 | GHDC     | 698  | 769  | 9.14596794657      |
| NM_021034    | IFITM3   | 404  | 443  | 7.01108822946      |
| NM_021034    | IFITM3   | 450  | 492  | 8.42613245979      |
| NM_021034    | IFITM3   | 180  | 387  | 9.51359530104      |
| NM_201566    | SLC16A13 |      | 1150 | 1205 9.4804100186  |
| NM_004371    | COPA     | 2562 | 2642 | 5.91582816864      |
| NM_006405    | TM9SF1   | 1016 | 1081 | 7.46271931322      |
| NM_006405    | TM9SF1   | 640  | 684  | 7.04366421377      |
| NM_006405    | TM9SF1   | 1548 | 1616 | 7.78464717219      |
| NM_006405    | TM9SF1   | 1315 | 1356 | 8.04366421377      |
| NM_006405    | TM9SF1   | 2086 | 2139 | 7.46254556291      |
| NM_006405    | TM9SF1   | 1151 | 1208 | 8.46271931323      |
| NM_003164    | STX5     | 109  | 136  | 6.53545572414      |

|              |             |      |      |                    |
|--------------|-------------|------|------|--------------------|
| NM_006407    | ARL6IP5     | 511  | 582  | 7.28332840434      |
| NM_006406    | PRDX4       | 665  | 717  | 7.02402421181      |
| NM_006406    | PRDX4       | 760  | 799  | 6.21666952544      |
| NM_006406    | PRDX4       | 526  | 557  | 4.21265192549      |
| NM_006406    | PRDX4       | 313  | 358  | 7.21265192549      |
| NM_006406    | PRDX4       | 579  | 636  | 7.53859762055      |
| NM_006401    | ANP32B      | 883  | 907  | 2.03962509885      |
| NM_006408    | AGR2        | 728  | 798  | 11.2577384973      |
| NM_006408    | AGR2        | 571  | 711  | 11.9496162019      |
| NM_001202470 | RPS10-NUDT3 |      | 333  | 378 3.9184390198   |
| NM_001010888 | ZC3H12B     | 4562 | 4584 | 11.9346421509      |
| NM_001010883 | FAM102B     | 5073 | 5094 | 8.39550798453      |
| NM_013291    | CPSF1       | 3999 | 4030 | 7.91419833411      |
| NM_133367    | PAQR8       | 1023 | 1073 | 10.1202604181      |
| NM_002562    | P2RX7       | 2030 | 2050 | 11.2348243372      |
| NM_002568    | PABPC1      | 1668 | 1697 | -1.52284207926     |
| NM_002568    | PABPC1      | 670  | 731  | 1.36864532113      |
| NM_002568    | PABPC1      | 376  | 455  | 0.561296894209     |
| NM_000701    | ATP1A1      | 1212 | 1262 | 5.71277783783      |
| NM_000701    | ATP1A1      | 2319 | 2405 | 5.18226312113      |
| NM_000701    | ATP1A1      | 1448 | 1518 | 5.40465554247      |
| NM_000701    | ATP1A1      | 3540 | 3587 | 3.00832051952      |
| NM_000701    | ATP1A1      | 3409 | 3525 | 5.59730062041      |
| NM_000701    | ATP1A1      | 1031 | 1073 | 4.47176973833      |
| NM_000701    | ATP1A1      | 2242 | 2285 | 4.47176973833      |
| NM_000701    | ATP1A1      | 88   | 130  | 2.5971268701       |
| NM_000701    | ATP1A1      | 2718 | 2840 | 6.09980096094      |
| NM_000701    | ATP1A1      | 2845 | 2894 | 4.71277783783      |
| NM_000701    | ATP1A1      | 2039 | 2187 | 6.26026563314      |
| NM_000701    | ATP1A1      | 823  | 1018 | 6.36989012431      |
| NM_000701    | ATP1A1      | 590  | 680  | 4.81969304175      |
| NM_000701    | ATP1A1      | 3651 | 3705 | 2.01233138864      |
| NM_000701    | ATP1A1      | 3249 | 3359 | 5.65619430947      |
| NM_000701    | ATP1A1      | 1535 | 1626 | 4.18226312113      |
| NM_000701    | ATP1A1      | 2899 | 3088 | 6.81969304175      |
| NM_000701    | ATP1A1      | 1100 | 1209 | 5.76722562186      |
| NM_000701    | ATP1A1      | 3105 | 3243 | 6.33426621458      |
| NM_000701    | ATP1A1      | 1662 | 1794 | 6.50419121602      |
| NM_000701    | ATP1A1      | 487  | 562  | 4.9192287153       |
| NM_000701    | ATP1A1      | 237  | 458  | 6.09980096094      |
| NM_000701    | ATP1A1      | 691  | 741  | 1.01233811214      |
| NM_000701    | ATP1A1      | 1797 | 2020 | 6.29774033855      |
| NM_000701    | ATP1A1      | 1284 | 1446 | 6.01233811969      |
| NM_000701    | ATP1A1      | 2434 | 2718 | 7.67054960244      |
| NM_005698    | SCAMP3      | 1060 | 1141 | 9.02909348023      |
| NM_005698    | SCAMP3      | 935  | 996  | 7.61404925745      |
| NM_005698    | SCAMP3      | 716  | 782  | 8.02909348023      |
| NM_005697    | SCAMP2      | 629  | 687  | 8.72849401304      |
| NM_001122752 | SERPINI1    |      | 1274 | 1314 7.53449864721 |
| NM_001142364 | ALG5        | 894  | 953  | 7.12917128042      |

|              |              |      |      |                   |
|--------------|--------------|------|------|-------------------|
| NM_001142364 | ALG5         | 354  | 424  | 6.1291710445      |
| NM_005030    | PLK1         | 1086 | 1119 | 6.05496921435     |
| NM_017847    | C1orf27      | 1195 | 1224 | 8.92926732061     |
| NM_017847    | C1orf27      | 804  | 871  | 9.29183763569     |
| NM_001862    | COX5B        | 168  | 211  | 3.69329911078     |
| NM_001861    | COX4I1       | 672  | 714  | 2.2943118589      |
| NM_001867    | COX7C        | 189  | 238  | 5.01778032823     |
| NM_004638    | PRRC2A       | 4317 | 4368 | 6.34174043518     |
| NM_004327    | BCR          | 211  | 251  | 6.16517945578     |
| NM_004324    | BAX          | 274  | 340  | 6.32887110835     |
| NM_004324    | BAX          | 451  | 519  | 5.74390188412     |
| NM_025250    | TTYH3        | 1445 | 1483 | 6.54813786102     |
| NM_025250    | TTYH3        | 1269 | 1335 | 6.87904288197     |
| NM_025250    | TTYH3        | 692  | 726  | 5.87904288197     |
| NM_025250    | TTYH3        | 406  | 442  | 6.96300834104     |
| NM_025250    | TTYH3        | 221  | 263  | 7.96318209114     |
| NM_025250    | TTYH3        | 1038 | 1097 | 5.87904288197     |
| NM_025250    | TTYH3        | 3091 | 3150 | 6.96318208381     |
| NM_025250    | TTYH3        | 731  | 849  | 9.1331070928      |
| NM_025250    | TTYH3        | 2569 | 2606 | 7.87904288197     |
| NM_025250    | TTYH3        | 1115 | 1199 | 7.77053701341     |
| NM_025250    | TTYH3        | 1588 | 1645 | 7.28109258607     |
| NM_025250    | TTYH3        | 3799 | 3868 | 8.77053701341     |
| NM_025250    | TTYH3        | 4586 | 4627 | 5.87904288197     |
| NM_025250    | TTYH3        | 940  | 1035 | 8.96318209136     |
| NM_025250    | TTYH3        | 350  | 397  | 5.95916449118     |
| NM_001146333 | SUMF2        | 336  | 410  | 9.87019382317     |
| NM_001146333 | SUMF2        | 597  | 701  | 10.5706335413     |
| NM_001146333 | SUMF2        | 178  | 250  | 10.0401188246     |
| NM_001146333 | SUMF2        | 290  | 336  | 7.86617622299     |
| NM_001164468 | TMED7-TICAM2 |      | 840  | 895 7.26933923721 |
| NM_001164468 | TMED7-TICAM2 |      | 492  | 553 7.26532163726 |
| NM_001164465 | GOLGA6L10    |      | 118  | 137 6.29344185728 |
| NM_001242598 | TMEM147      | 361  | 437  | 8.92077435959     |
| NM_145265    | CCDC127      | 74   | 105  | 6.30555962126     |
| NM_031450    | C11orf68     |      | 30   | 67 8.62673414414  |
| NM_031453    | FAM107B      | 2058 | 2080 | 4.30544995845     |
| NM_002952    | RPS2         | 402  | 457  | 2.17804104608     |
| NM_002952    | RPS2         | 752  | 808  | -0.629313875976   |
| NM_001184796 | ESYT1        | 651  | 705  | 8.28048425403     |
| NM_001184796 | ESYT1        | 836  | 898  | 9.08783917631     |
| NM_001184796 | ESYT1        | 2711 | 2774 | 8.60223859882     |
| NM_001184796 | ESYT1        | 151  | 195  | 8.19634504487     |
| NM_001184796 | ESYT1        | 588  | 629  | 7.86544675496     |
| NM_001184796 | ESYT1        | 1368 | 1430 | 6.27646665408     |
| NM_001184796 | ESYT1        | 1108 | 1167 | 8.2804842467      |
| NM_001184796 | ESYT1        | 1802 | 1872 | 8.60241211322     |
| NM_001184796 | ESYT1        | 728  | 807  | 10.0878391763     |
| NM_001184796 | ESYT1        | 1966 | 2015 | 8.78130754559     |
| NM_001184796 | ESYT1        | 1221 | 1267 | 7.27646665408     |

|              |         |      |      |                  |
|--------------|---------|------|------|------------------|
| NM_001184796 | ESYT1   | 1667 | 1705 | 9.00369996692    |
| NM_001184796 | ESYT1   | 400  | 483  | 8.86527300465    |
| NM_001184796 | ESYT1   | 242  | 316  | 8.27646665408    |
| NM_002950    | RPN1    | 1428 | 1476 | 6.40612649876    |
| NM_002950    | RPN1    | 1106 | 1242 | 8.32039662473    |
| NM_002950    | RPN1    | 629  | 694  | 7.0276148755     |
| NM_002950    | RPN1    | 592  | 621  | 4.28663168116    |
| NM_002950    | RPN1    | 153  | 241  | 6.40612649876    |
| NM_002950    | RPN1    | 273  | 341  | 5.70568678062    |
| NM_002950    | RPN1    | 1579 | 1643 | 4.29064928134    |
| NM_002950    | RPN1    | 353  | 384  | 4.29047553102    |
| NM_002950    | RPN1    | 777  | 853  | 6.51304170267    |
| NM_002950    | RPN1    | 1254 | 1363 | 6.95361429406    |
| NM_002950    | RPN1    | 875  | 938  | 5.5090241025     |
| NM_002950    | RPN1    | 991  | 1075 | 5.0276148755     |
| NM_002950    | RPN1    | 1660 | 1840 | 7.16511839925    |
| NM_002950    | RPN1    | 424  | 520  | 3.70568678061    |
| NM_024612    | DHX40   | 1966 | 1987 | 5.55694164338    |
| NM_175066    | DDX51   | 2294 | 2315 | 9.02805089311    |
| NM_175066    | DDX51   | 2459 | 2505 | 8.02805089311    |
| NM_006098    | GNB2L1  | 211  | 295  | -0.0981086509032 |
| NM_006098    | GNB2L1  | 679  | 735  | 0.303352717201   |
| NM_006098    | GNB2L1  | 408  | 464  | -0.835074245069  |
| NM_006090    | CEPT1   | 301  | 365  | 9.82759931738    |
| NM_078473    | TM2D2   | 571  | 651  | 9.56952041104    |
| NM_178509    | STXBP4  | 1325 | 1344 | 8.83983015889    |
| NM_014730    | MLEC    | 584  | 633  | 7.08426339119    |
| NM_032189    | ATP11A  | 3637 | 3705 | 7.42572332389    |
| NM_032189    | ATP11A  | 72   | 118  | 7.42572332389    |
| NM_032189    | ATP11A  | 4573 | 4610 | 4.7567953641     |
| NM_032189    | ATP11A  | 1123 | 1164 | 5.7567953641     |
| NM_032189    | ATP11A  | 3151 | 3201 | 6.34175786483    |
| NM_032189    | ATP11A  | 1497 | 1591 | 7.64828949555    |
| NM_032189    | ATP11A  | 3066 | 3109 | 7.42589683829    |
| NM_032189    | ATP11A  | 1222 | 1297 | 8.01085957493    |
| NM_001143775 | CTDNEP1 | 316  | 347  | 2.67501226569    |
| NM_014229    | SLC6A11 | 543  | 603  | 9.65879968242    |
| NM_015173    | TBC1D1  | 3750 | 3768 | 6.6171475171     |
| NM_001177387 | ATXN7   | 149  | 175  | 8.3572815977     |
| NM_019059    | TOMM7   | 248  | 321  | 2.91011839156    |
| NM_019050    | USP53   | 140  | 161  | 7.57398574767    |
| NM_205845    | AKR1C2  | 1144 | 1185 | 1.54468523573    |
| NM_001456    | FLNA    | 6486 | 6544 | 7.0059090648     |
| NM_001456    | FLNA    | 979  | 1025 | 5.27867575196    |
| NM_001456    | FLNA    | 5218 | 5260 | 6.86363825268    |
| NM_001456    | FLNA    | 2038 | 2090 | 6.52048223763    |
| NM_001456    | FLNA    | 4219 | 4260 | 5.86363825268    |
| NM_001456    | FLNA    | 5298 | 5342 | 5.27867575196    |
| NM_001456    | FLNA    | 3532 | 3567 | 5.27867575196    |
| NM_007114    | TMF1    | 2008 | 2029 | 6.40548233948    |

|              |           |      |      |                |               |
|--------------|-----------|------|------|----------------|---------------|
| NM_007118    | TRIO      | 2280 | 2314 | 7.64680596936  |               |
| NM_007118    | TRIO      | 6859 | 6902 | 5.64663895009  |               |
| NM_014501    | UBE2S     | 639  | 695  | 9.02487479451  |               |
| NM_000146    | FTL       | 123  | 176  | 3.31163289813  |               |
| NM_000146    | FTL       | 262  | 343  | 4.31163289814  |               |
| NM_000146    | FTL       | 562  | 603  | 0.504271245029 |               |
| NM_000146    | FTL       | 376  | 484  | 3.96370959472  |               |
| NM_000146    | FTL       | 39   | 122  | 3.0892404768   |               |
| NM_000147    | FUCA1     | 528  | 601  | 8.31897694939  |               |
| NM_000147    | FUCA1     | 1345 | 1381 | 7.65389283946  |               |
| NM_021052    | HIST1H2AE |      | 225  | 271            | 10.5776346983 |
| NM_021052    | HIST1H2AE |      | 39   | 99             | 9.83682525425 |
| NM_173054    | RELN      | 127  | 159  | 7.11207430715  |               |
| NM_173054    | RELN      | 9051 | 9111 | 6.97457078318  |               |
| NM_173054    | RELN      | 1455 | 1516 | 6.6524689382   |               |
| NM_173054    | RELN      | 5042 | 5082 | 5.65263595746  |               |
| NM_173054    | RELN      | 2831 | 2865 | 5.97055318323  |               |
| NM_173054    | RELN      | 7110 | 7145 | 6.23760495332  |               |
| NM_173054    | RELN      | 7745 | 7787 | 5.23760518901  |               |
| NM_173054    | RELN      | 9153 | 9189 | 4.64862508834  |               |
| NM_173054    | RELN      | 3911 | 3950 | 5.65264268097  |               |
| NM_173054    | RELN      | 591  | 634  | 4.65263595746  |               |
| NM_173054    | RELN      | 6553 | 6616 | 5.64862508834  |               |
| NM_173054    | RELN      | 8899 | 8952 | 5.65264268829  |               |
| NM_173054    | RELN      | 6839 | 6876 | 3.6524689382   |               |
| NM_173054    | RELN      | 3365 | 3403 | 5.6526424526   |               |
| NM_173054    | RELN      | 7357 | 7398 | 5.89043157402  |               |
| NM_173054    | RELN      | 8088 | 8127 | 5.15346597985  |               |
| NM_173054    | RELN      | 4245 | 4295 | 5.56850347913  |               |
| NM_173054    | RELN      | 4629 | 4675 | 3.6524689382   |               |
| NM_173054    | RELN      | 4779 | 4828 | 3.65263595746  |               |
| NM_173054    | RELN      | 2947 | 2971 | 3.56850347913  |               |
| NM_173054    | RELN      | 1980 | 2043 | 7.23760518924  |               |
| NM_173054    | RELN      | 8385 | 8470 | 5.23760518169  |               |
| NM_173054    | RELN      | 6220 | 6282 | 4.6526424526   |               |
| NM_173054    | RELN      | 5457 | 5571 | 7.82256768996  |               |
| NM_173054    | RELN      | 4008 | 4061 | 3.65263595746  |               |
| NM_000021    | PSEN1     | 640  | 675  | 8.32206691474  |               |
| NM_000021    | PSEN1     | 1002 | 1046 | 8.80766749201  |               |
| NM_000021    | PSEN1     | 851  | 907  | 9.00031256262  |               |
| NM_001174126 | SLC11A2   | 1215 | 1255 | 8.87879014898  |               |
| NM_001174126 | SLC11A2   | 1525 | 1597 | 8.69016267121  |               |
| NM_001174126 | SLC11A2   | 1687 | 1713 | 7.38363104049  |               |
| NM_001002029 | C4B       | 4854 | 4901 | 5.15635052406  |               |
| NM_001002029 | C4B       | 4538 | 4580 | 3.07238506499  |               |
| NM_001002029 | C4B       | 4457 | 4527 | 6.32644927582  |               |
| NM_001002029 | C4B       | 3501 | 3542 | 5.15635052406  |               |
| NM_001002029 | C4B       | 4642 | 4687 | 5.15635052406  |               |
| NM_001002029 | C4B       | 2765 | 2803 | 4.74131302478  |               |
| NM_001002029 | C4B       | 4759 | 4830 | 5.15652426683  |               |

|              |          |      |      |                   |
|--------------|----------|------|------|-------------------|
| NM_001002029 | C4B      | 2619 | 2701 | 6.15652427438     |
| NM_001002029 | C4B      | 5152 | 5204 | 4.15652403846     |
| NM_001002029 | C4B      | 2835 | 2958 | 5.7414867751      |
| NM_001002029 | C4B      | 2389 | 2492 | 7.06341486999     |
| NM_001002029 | C4B      | 1512 | 1551 | 4.74148004405     |
| NM_001002029 | C4B      | 2214 | 2279 | 4.74148653918     |
| NM_001002029 | C4B      | 1997 | 2043 | 3.1525066742      |
| NM_001002029 | C4B      | 3377 | 3421 | 3.07238506499     |
| NM_001002029 | C4B      | 890  | 980  | 6.7414867751      |
| NM_001002029 | C4B      | 165  | 213  | 4.1525066742      |
| NM_001002029 | C4B      | 5061 | 5123 | 5.47845236904     |
| NM_001002029 | C4B      | 2313 | 2357 | 4.15635052406     |
| NM_001002029 | C4B      | 4288 | 4363 | 5.15652426683     |
| NM_001002029 | C4B      | 3059 | 3132 | 5.7414867751      |
| NM_001002029 | C4B      | 1356 | 1407 | 4.1525066742      |
| NM_001002029 | C4B      | 3444 | 3476 | 3.1525066742      |
| NM_001002029 | C4B      | 1911 | 1992 | 4.7414867751      |
| NM_001002029 | C4B      | 642  | 700  | 4.74148004405     |
| NM_153649    | TPM3     | 835  | 874  | 0.91518777755     |
| NM_004864    | GDF15    | 7    | 101  | 10.0021206048     |
| NM_004864    | GDF15    | 626  | 767  | 10.0281158133     |
| NM_004864    | GDF15    | 1100 | 1212 | 8.97564839342     |
| NM_004864    | GDF15    | 771  | 865  | 8.86461708103     |
| NM_004864    | GDF15    | 145  | 583  | 11.2868500817     |
| NM_004864    | GDF15    | 876  | 1025 | 9.4686884047      |
| NM_020183    | ARNTL2   | 5298 | 5320 | 10.87894365       |
| NM_021999    | ITM2B    | 691  | 744  | 4.01568723254     |
| NM_021999    | ITM2B    | 760  | 802  | 3.60064996163     |
| NM_021999    | ITM2B    | 467  | 494  | 4.01568746823     |
| NM_021999    | ITM2B    | 835  | 909  | 5.92257806407     |
| NM_021999    | ITM2B    | 359  | 401  | 3.596632369       |
| NM_006447    | USP16    | 320  | 361  | 6.89625209478     |
| NM_018424    | EPB41L4B |      | 241  | 270 6.51193565874 |
| NM_145102    | ZKSCAN5  | 3018 | 3038 | 6.6375125522      |
| NM_003145    | SSR2     | 150  | 211  | 6.8392172377      |
| NM_003145    | SSR2     | 219  | 388  | 8.28400208037     |
| NM_003145    | SSR2     | 752  | 822  | 3.66527463609     |
| NM_003145    | SSR2     | 395  | 592  | 8.28400208037     |
| NM_003144    | SSR1     | 1149 | 1196 | 3.58357064089     |
| NM_003144    | SSR1     | 1016 | 1093 | 3.58357064089     |
| NM_003144    | SSR1     | 931  | 968  | 3.58357064067     |
| NM_003144    | SSR1     | 777  | 813  | 2.99860813995     |
| NM_003144    | SSR1     | 825  | 878  | 4.99860814017     |
| NM_003144    | SSR1     | 280  | 440  | 5.80596306223     |
| NM_003144    | SSR1     | 562  | 710  | 5.69904785831     |
| NM_005222    | DLX6     | 1020 | 1050 | 8.07624541487     |
| NM_004252    | SLC9A3R1 |      | 826  | 852 4.7525349267  |
| NM_004925    | AQP3     | 616  | 647  | 9.50542784792     |
| NM_014033    | METTTL7A | 799  | 857  | 7.62777205375     |
| NM_014033    | METTTL7A | 482  | 532  | 5.03879195286     |

|              |          |       |       |                   |
|--------------|----------|-------|-------|-------------------|
| NM_014033    | METTTL7A | 337   | 377   | 5.03879195286     |
| NM_014033    | METTTL7A | 615   | 639   | 5.62375445358     |
| NM_014033    | METTTL7A | 675   | 761   | 7.74324927117     |
| NM_014033    | METTTL7A | 761   | 797   | 4.04263580271     |
| NM_001206931 | SLC6A12  | 1767  | 1819  | 10.6232793736     |
| NM_001145966 | MKI67    | 3659  | 3677  | 5.45414495409     |
| NM_002387    | MCC      | 6828  | 6852  | 11.7969834114     |
| NM_018046    | AGGF1    | 1452  | 1487  | 6.30250493811     |
| NM_014698    | TMEM63A  | 2857  | 2903  | 7.19834882453     |
| NM_014698    | TMEM63A  | 1552  | 1586  | 8.19450497467     |
| NM_033396    | TNKS1BP1 |       | 10    | 52 7.54096940973  |
| NM_012342    | BAMBI    | 1055  | 1102  | 4.8434231807      |
| NM_012342    | BAMBI    | 560   | 623   | 5.43239655054     |
| NM_005015    | OXA1L    | 995   | 1027  | 5.22972126784     |
| NM_005010    | NRCAM    | 3622  | 3655  | 12.8104725639     |
| NM_201379    | PLEC     | 9819  | 9869  | 10.2783048187     |
| NM_201379    | PLEC     | 14228 | 14265 | 9.3461689387      |
| NM_201379    | PLEC     | 8290  | 8329  | 8.10837981728     |
| NM_201379    | PLEC     | 8426  | 8500  | 8.02424084381     |
| NM_001206941 | FAM115A  | 1353  | 1385  | 8.19588893668     |
| NM_153816    | SNX14    | 1991  | 2032  | 6.0551901602      |
| NM_001153    | ANXA4    | 168   | 223   | 5.78110093149     |
| NM_001153    | ANXA4    | 627   | 667   | 5.04413533733     |
| NM_001153    | ANXA4    | 483   | 535   | 5.78110093149     |
| NM_001153    | ANXA4    | 719   | 766   | 5.53929444582     |
| NM_001150    | ANPEP    | 1562  | 1611  | 4.96934288565     |
| NM_017820    | EXD3     | 115   | 134   | 11.377310003      |
| NM_020062    | SLC2A4RG |       | 268   | 295 7.33587027811 |
| NM_001146314 | ABHD14B  | 977   | 1002  | 6.57995420507     |
| NM_016333    | SRRM2    | 5670  | 5725  | 5.57706549161     |
| NM_016333    | SRRM2    | 7373  | 7400  | 3.90796378151     |
| NM_016333    | SRRM2    | 6557  | 6659  | 5.57706549162     |
| NM_198892    | BMP2K    | 193   | 218   | 8.72812342409     |
| NM_006654    | FRS2     | 702   | 721   | 8.21696273433     |
| NM_016147    | PPME1    | 352   | 371   | 5.94048746504     |
| NM_001079559 | HNRNPUL2 |       | 463   | 524 5.53942200195 |
| NM_001145201 | PRAP1    | 218   | 303   | 11.9245312748     |
| NM_001145201 | PRAP1    | 318   | 354   | 8.67046706399     |
| NM_005228    | EGFR     | 1789  | 1832  | 7.68472827602     |
| NM_005228    | EGFR     | 3076  | 3154  | 7.10378337547     |
| NM_005228    | EGFR     | 1937  | 1992  | 8.10378313955     |
| NM_005228    | EGFR     | 2791  | 2857  | 9.56321499411     |
| NM_005228    | EGFR     | 3375  | 3421  | 8.10377664442     |
| NM_005228    | EGFR     | 1483  | 1516  | 7.0997657753      |
| NM_005228    | EGFR     | 3240  | 3310  | 8.91113829753     |
| NM_005228    | EGFR     | 3330  | 3364  | 8.68873914514     |
| NM_005228    | EGFR     | 628   | 656   | 7.60460666681     |
| NM_005228    | EGFR     | 1833  | 1909  | 8.68874564028     |
| NM_005228    | EGFR     | 2694  | 2770  | 8.10377664442     |
| NM_005228    | EGFR     | 2126  | 2166  | 7.0997657753      |



|              |        |      |      |               |
|--------------|--------|------|------|---------------|
| NM_005228    | EGFR   | 1142 | 1203 | 9.2735346266  |
| NM_005228    | EGFR   | 2272 | 2317 | 6.01964416609 |
| NM_005228    | EGFR   | 3467 | 3502 | 7.01964416609 |
| NM_005228    | EGFR   | 2352 | 2424 | 9.68874587619 |
| NM_014752    | SPCS2  | 857  | 944  | 5.69862054213 |
| NM_014752    | SPCS2  | 626  | 660  | 3.89126562007 |
| NM_014752    | SPCS2  | 122  | 168  | 4.47622812079 |
| NM_032169    | ACAD11 | 2971 | 3003 | 5.81437645759 |
| NM_001171991 | HCCS   | 65   | 95   | 4.77224434614 |
| NM_001204401 | XIAP   | 6972 | 6997 | 7.4948467278  |
| NM_032704    | TUBA1C | 877  | 936  | 5.15991154056 |
| NM_032704    | TUBA1C | 429  | 545  | 5.89687736309 |
| NM_001098625 | JKAMP  | 629  | 666  | 11.0833988208 |
| NM_022748    | TNS3   | 1745 | 1790 | 9.76242157169 |
| NM_015154    | MESDC2 | 582  | 638  | 5.75267858889 |
| NM_015154    | MESDC2 | 506  | 547  | 5.01571299472 |
| NM_015154    | MESDC2 | 253  | 308  | 4.93157402125 |
| NM_016836    | RBMS1  | 1859 | 1878 | 2.14242387845 |
| NM_205834    | LSR    | 501  | 561  | 9.49594054487 |
| NM_205834    | LSR    | 1697 | 1737 | 7.38046309153 |
| NM_205834    | LSR    | 1978 | 2038 | 9.96542582817 |
| NM_205834    | LSR    | 1351 | 1398 | 8.1172551713  |
| NM_205834    | LSR    | 1270 | 1325 | 7.3804633199  |
| NM_205834    | LSR    | 1524 | 1577 | 8.79550082673 |
| NM_205834    | LSR    | 891  | 946  | 7.38028957713 |
| NM_205834    | LSR    | 1792 | 1871 | 9.70239142233 |
| NM_205834    | LSR    | 811  | 878  | 8.60285574878 |
| NM_001305    | CLDN4  | 600  | 649  | 10.590163413  |
| NM_001305    | CLDN4  | 926  | 949  | 8.00118331215 |
| NM_001304    | CPD    | 481  | 531  | 6.09867589596 |
| NM_001304    | CPD    | 1803 | 1883 | 7.68765599685 |
| NM_001304    | CPD    | 2279 | 2314 | 7.6876492658  |
| NM_001304    | CPD    | 2609 | 2661 | 8.10268676508 |
| NM_001304    | CPD    | 1734 | 1790 | 8.27261849757 |
| NM_001304    | CPD    | 1069 | 1122 | 8.80313321427 |
| NM_001304    | CPD    | 3386 | 3426 | 7.10251974581 |
| NM_001304    | CPD    | 3923 | 3971 | 6.68765599663 |
| NM_001304    | CPD    | 727  | 761  | 7.82590920881 |
| NM_001304    | CPD    | 3613 | 3652 | 9.00958409174 |
| NM_001304    | CPD    | 780  | 832  | 7.91004841819 |
| NM_001304    | CPD    | 2979 | 3030 | 7.6876492658  |
| NM_001304    | CPD    | 374  | 421  | 6.68363839668 |
| NM_001304    | CPD    | 1139 | 1188 | 6.60351678747 |
| NM_001304    | CPD    | 3680 | 3733 | 6.09867589596 |
| NM_001304    | CPD    | 2103 | 2136 | 6.09867589596 |
| NM_001304    | CPD    | 3124 | 3257 | 9.35062100957 |
| NM_001304    | CPD    | 2825 | 2900 | 6.10269349613 |
| NM_001304    | CPD    | 2014 | 2040 | 7.09867589596 |
| NM_001304    | CPD    | 569  | 676  | 8.68765599685 |
| NM_001304    | CPD    | 3045 | 3116 | 8.10269349613 |

|              |        |      |      |               |
|--------------|--------|------|------|---------------|
| NM_001304    | CPD    | 2318 | 2394 | 7.10269349613 |
| NM_001308    | CPN1   | 1157 | 1201 | 7.62803151945 |
| NM_000308    | CTSA   | 1290 | 1336 | 7.65427512052 |
| NM_000308    | CTSA   | 1609 | 1642 | 6.33234702563 |
| NM_000308    | CTSA   | 1016 | 1064 | 8.032786744   |
| NM_000308    | CTSA   | 1494 | 1601 | 9.5022720273  |
| NM_000308    | CTSA   | 2150 | 2209 | 5.33234701831 |
| NM_000308    | CTSA   | 374  | 470  | 7.65426838969 |
| NM_000308    | CTSA   | 474  | 504  | 4.24820781647 |
| NM_000308    | CTSA   | 1358 | 1423 | 6.65427512074 |
| NM_000308    | CTSA   | 1178 | 1263 | 7.91730952658 |
| NM_000308    | CTSA   | 619  | 709  | 7.79177864449 |
| NM_201524    | GPR56  | 1749 | 1796 | 11.4066729158 |
| NM_201524    | GPR56  | 1360 | 1401 | 11.9916354165 |
| NM_000302    | PL0D1  | 733  | 779  | 5.14148287125 |
| NM_001042532 | COASY  | 1021 | 1063 | 6.54580804079 |
| NM_000169    | GLA    | 663  | 722  | 9.05566921814 |
| NM_000169    | GLA    | 554  | 609  | 7.4705329671  |
| NM_000169    | GLA    | 184  | 208  | 6.88557046638 |
| NM_000169    | GLA    | 324  | 405  | 8.20767231159 |
| NM_000169    | GLA    | 824  | 933  | 9.20767231159 |
| NM_020300    | MGST1  | 261  | 333  | 7.82764755143 |
| NM_020300    | MGST1  | 217  | 256  | 6.50571945654 |
| NM_020300    | MGST1  | 405  | 518  | 7.50571945654 |
| NM_000365    | TPI1   | 472  | 529  | 2.05294939924 |
| NM_013255    | MKLN1  | 0    | 22   | 6.17654944576 |
| NM_024792    | FAM57A | 772  | 798  | 8.61078752277 |
| NM_002210    | ITGAV  | 973  | 1024 | 6.10765065533 |
| NM_002210    | ITGAV  | 3050 | 3095 | 7.1076441602  |
| NM_002210    | ITGAV  | 2650 | 2696 | 7.98212000917 |
| NM_002210    | ITGAV  | 328  | 367  | 6.02351168187 |
| NM_002210    | ITGAV  | 1950 | 1996 | 6.10363329108 |
| NM_002210    | ITGAV  | 1614 | 1658 | 6.84059888524 |
| NM_002210    | ITGAV  | 2220 | 2269 | 5.43854918115 |
| NM_002210    | ITGAV  | 370  | 416  | 6.76047727603 |
| NM_002210    | ITGAV  | 2136 | 2199 | 6.10765089124 |
| NM_002210    | ITGAV  | 756  | 803  | 7.52268839053 |
| NM_002210    | ITGAV  | 3108 | 3138 | 5.43854918115 |
| NM_002210    | ITGAV  | 1352 | 1394 | 6.84059888524 |
| NM_002210    | ITGAV  | 495  | 561  | 7.84461648542 |
| NM_002210    | ITGAV  | 1256 | 1291 | 7.52268839053 |
| NM_002210    | ITGAV  | 2968 | 3011 | 6.51867079036 |
| NM_002210    | ITGAV  | 41   | 81   | 6.10363329108 |
| NM_002210    | ITGAV  | 1028 | 1081 | 6.84460975436 |
| NM_002210    | ITGAV  | 681  | 730  | 6.43854918115 |
| NM_002211    | ITGB1  | 2096 | 2163 | 6.67676036004 |
| NM_002211    | ITGB1  | 1910 | 1970 | 6.41372595421 |
| NM_002211    | ITGB1  | 2294 | 2365 | 7.46103166899 |
| NM_002211    | ITGB1  | 2409 | 2474 | 5.5068353586  |
| NM_002211    | ITGB1  | 384  | 447  | 4.50683535105 |

|              |         |      |      |                 |
|--------------|---------|------|------|-----------------|
| NM_002211    | ITGB1   | 997  | 1053 | 4.82876345349   |
| NM_002211    | ITGB1   | 1407 | 1448 | 5.31419028066   |
| NM_002211    | ITGB1   | 1802 | 1848 | 5.31419028066   |
| NM_002211    | ITGB1   | 1650 | 1736 | 6.89915278138   |
| NM_002211    | ITGB1   | 1971 | 2086 | 7.03039731466   |
| NM_002211    | ITGB1   | 621  | 816  | 8.26172286077   |
| NM_002211    | ITGB1   | 903  | 985  | 5.5068353586    |
| NM_002211    | ITGB1   | 2759 | 2839 | 2.50281775843   |
| NM_002213    | ITGB5   | 2312 | 2346 | 6.83027968724   |
| NM_002213    | ITGB5   | 3204 | 3240 | 7.16519557731   |
| NM_002213    | ITGB5   | 1794 | 1845 | 7.24933477914   |
| NM_002216    | ITIH2   | 1723 | 1767 | 2.95972777868   |
| NM_002216    | ITIH2   | 1042 | 1077 | 2.42920633093   |
| NM_002216    | ITIH2   | 2301 | 2362 | 2.71871967918   |
| NM_002216    | ITIH2   | 1219 | 1251 | 1.57719855525   |
| NM_002216    | ITIH2   | 1092 | 1121 | 1.25527046037   |
| NM_002216    | ITIH2   | 2368 | 2405 | 0.760111351877  |
| NM_002216    | ITIH2   | 394  | 429  | 1.58121615542   |
| NM_002216    | ITIH2   | 53   | 92   | 1.57719855525   |
| NM_002216    | ITIH2   | 941  | 1042 | 4.65160548332   |
| NM_002216    | ITIH2   | 491  | 593  | 4.5446902794    |
| NM_002216    | ITIH2   | 869  | 904  | -0.740712175379 |
| NM_002216    | ITIH2   | 2699 | 2768 | 2.25928806054   |
| NM_002216    | ITIH2   | 604  | 666  | 3.25928806054   |
| NM_002216    | ITIH2   | 1675 | 1720 | 2.25928806054   |
| NM_002216    | ITIH2   | 2477 | 2518 | 1.58121615543   |
| NM_002216    | ITIH2   | 230  | 286  | 3.65160548332   |
| NM_002216    | ITIH2   | 670  | 837  | 4.87399790466   |
| NM_002216    | ITIH2   | 294  | 369  | 1.17514885116   |
| NM_002216    | ITIH2   | 2156 | 2227 | 1.58121615543   |
| NM_002216    | ITIH2   | 1323 | 1462 | 3.7828500166    |
| NM_002216    | ITIH2   | 2544 | 2695 | 4.25928806054   |
| NM_002216    | ITIH2   | 1893 | 2093 | 5.3036821799    |
| NM_002216    | ITIH2   | 1770 | 1877 | 4.11726905567   |
| NM_002216    | ITIH2   | 1497 | 1673 | 4.84425056126   |
| NM_002216    | ITIH2   | 2778 | 2984 | 5.34675090179   |
| NM_002216    | ITIH2   | 1124 | 1208 | 2.25928806032   |
| NM_001935    | DPP4    | 2333 | 2371 | 3.78000648991   |
| NM_001935    | DPP4    | 1495 | 1574 | 5.58753515474   |
| NM_004147    | DRG1    | 928  | 983  | 5.91617753517   |
| NM_004145    | MY09B   | 3053 | 3075 | 8.41209252661   |
| NM_012325    | MAPRE1  | 64   | 111  | 2.3506968582    |
| NM_012321    | LSM4    | 513  | 536  | 6.28784660564   |
| NM_012321    | LSM4    | 185  | 266  | 6.28767285555   |
| NM_001190328 | YJEFN3  | 517  | 538  | 11.3273221915   |
| NM_014944    | CLSTN1  | 3698 | 3745 | 6.17083257534   |
| NM_014944    | CLSTN1  | 2382 | 2421 | 3.84890448045   |
| NM_014944    | CLSTN1  | 3283 | 3340 | 5.51783244024   |
| NM_001135789 | PPIAL4C | 532  | 561  | 6.19081461437   |
| NM_138455    | CTHRC1  | 715  | 786  | 8.46458259712   |

|              |         |       |       |                |
|--------------|---------|-------|-------|----------------|
| NM_138459    | NUS1    | 1115  | 1161  | 4.4958784445   |
| NM_001199292 | HSD17B4 | 691   | 722   | 3.65389283946  |
| NM_001080501 | TMEM223 | 346   | 398   | 9.09658452805  |
| NM_001032293 | ZNF207  | 407   | 442   | 7.65746972346  |
| NM_001645    | APOC1   | 90    | 161   | 6.4411707837   |
| NM_001645    | APOC1   | 391   | 428   | 4.27107203194  |
| NM_001645    | APOC1   | 201   | 263   | 6.59317387692  |
| NM_001645    | APOC1   | 276   | 354   | 5.85620804706  |
| NM_024301    | FKRP    | 2683  | 2725  | 10.7643219424  |
| NM_001001486 | ATP2C1  | 1390  | 1420  | 7.14937279443  |
| NM_021871    | FGA     | 584   | 683   | 3.59959448834  |
| NM_021871    | FGA     | 1347  | 1407  | 1.48411727069  |
| NM_021871    | FGA     | 198   | 253   | 1.89915477019  |
| NM_021871    | FGA     | 421   | 469   | 2.22108286508  |
| NM_021871    | FGA     | 531   | 580   | 2.48411727092  |
| NM_021871    | FGA     | 1499  | 1582  | 2.59959448834  |
| NM_021871    | FGA     | 1423  | 1479  | 0.484117263366 |
| NM_021871    | FGA     | 887   | 1083  | 4.06907977164  |
| NM_021871    | FGA     | 1126  | 1242  | 2.89915477019  |
| NM_021870    | FGG     | 947   | 981   | 0.944602976728 |
| NM_021870    | FGG     | 1003  | 1045  | 2.5255478775   |
| NM_021870    | FGG     | 1185  | 1244  | 1.27550126685  |
| NM_021870    | FGG     | 446   | 486   | 0.944602741031 |
| NM_021870    | FGG     | 741   | 834   | 3.44710331748  |
| NM_145802    | SEPT6   | 1876  | 1895  | 5.46283679175  |
| NM_001143944 | LEMD2   | 800   | 836   | 6.95367156774  |
| NM_001143944 | LEMD2   | 756   | 795   | 7.19547805342  |
| NM_001143944 | LEMD2   | 463   | 495   | 5.95751541759  |
| NM_005245    | FAT1    | 3346  | 3375  | 6.48820445178  |
| NM_005245    | FAT1    | 4696  | 4740  | 7.706586004    |
| NM_005245    | FAT1    | 12563 | 12607 | 8.22517677699  |
| NM_005245    | FAT1    | 5970  | 6003  | 6.90324195106  |
| NM_005245    | FAT1    | 13256 | 13299 | 7.48419358266  |
| NM_005245    | FAT1    | 4778  | 4850  | 7.22500302668  |
| NM_005245    | FAT1    | 10879 | 10918 | 6.9030749318   |
| NM_005245    | FAT1    | 8315  | 8364  | 5.89923108194  |
| NM_005245    | FAT1    | 840   | 871   | 6.9030749318   |
| NM_005245    | FAT1    | 6948  | 7015  | 5.90324868211  |
| NM_005245    | FAT1    | 4360  | 4411  | 6.89923108194  |
| NM_005245    | FAT1    | 4888  | 4963  | 5.89923108194  |
| NM_005245    | FAT1    | 9856  | 9924  | 6.89923108194  |
| NM_005245    | FAT1    | 11283 | 11355 | 6.90324868189  |
| NM_002661    | PLCG2   | 7941  | 8179  | 17.1988418313  |
| NM_013446    | MKRN1   | 1343  | 1361  | 5.66664307901  |
| NM_001097642 | GJB1    | 506   | 545   | 5.56844517713  |
| NM_001142864 | PIEZ01  | 1409  | 1436  | 9.66127295661  |
| NM_001142864 | PIEZ01  | 1711  | 1762  | 11.0084465716  |
| NM_001142864 | PIEZ01  | 2251  | 2314  | 9.00844656428  |
| NM_001142864 | PIEZ01  | 4911  | 4951  | 9.74139456582  |
| NM_001142864 | PIEZ01  | 2970  | 3050  | 9.745412166    |

|              |          |      |      |                     |
|--------------|----------|------|------|---------------------|
| NM_001142864 | PIEZ01   | 7398 | 7492 | 9.74541215845       |
| NM_001142864 | PIEZ01   | 1321 | 1352 | 10.0082728215       |
| NM_001142864 | PIEZ01   | 1042 | 1108 | 9.33934486172       |
| NM_052972    | LRG1     | 490  | 574  | 10.0396627295       |
| NM_052972    | LRG1     | 769  | 828  | 8.6244514799        |
| NM_052972    | LRG1     | 612  | 670  | 9.62060763004       |
| NM_052972    | LRG1     | 865  | 936  | 8.03965599844       |
| NM_052972    | LRG1     | 688  | 745  | 9.84300005138       |
| NM_052972    | LRG1     | 1585 | 1643 | 9.84701741563       |
| NM_013279    | C11orf9  | 3088 | 3141 | 6.81137088735       |
| NM_013279    | C11orf9  | 2568 | 2622 | 9.40017723793       |
| NM_006575    | MAP4K5   | 66   | 95   | 5.84515414066       |
| NM_021095    | SLC5A6   | 889  | 978  | 7.95621462056       |
| NM_021095    | SLC5A6   | 992  | 1073 | 7.21924902639       |
| NM_021095    | SLC5A6   | 368  | 413  | 7.37125211984       |
| NM_021095    | SLC5A6   | 1787 | 1847 | 6.37107836952       |
| NM_001587    | OCRL     | 936  | 969  | 8.28343497071       |
| NM_006801    | KDELR1   | 395  | 518  | 7.79202497301       |
| NM_006801    | KDELR1   | 275  | 367  | 7.26151002039       |
| NM_006801    | KDELR1   | 522  | 725  | 8.99847585048       |
| NM_133259    | LRPPRC   | 710  | 732  | 3.60093306093       |
| NM_006805    | HNRNPA0  | 1087 | 1114 | 4.29711751542       |
| NM_003321    | TUFM     | 661  | 759  | 6.62031052752       |
| NM_003321    | TUFM     | 772  | 881  | 7.32075024566       |
| NM_003321    | TUFM     | 539  | 606  | 5.20527302824       |
| NM_003321    | TUFM     | 958  | 1059 | 6.20527302824       |
| NM_006200    | PCSK5    | 1770 | 1836 | 14.6585920289       |
| NM_006200    | PCSK5    | 539  | 594  | 13.1150214368       |
| NM_006200    | PCSK5    | 1342 | 1396 | 14.0065153323       |
| NM_006200    | PCSK5    | 2210 | 2252 | 13.1991539151       |
| NM_003329    | TXN      | 365  | 412  | 6.23733910773       |
| NM_006208    | ENPP1    | 2387 | 2468 | 4.62328743191       |
| NM_006208    | ENPP1    | 1359 | 1407 | 4.53914845845       |
| NM_004539    | NARS     | 704  | 723  | 2.26449999712       |
| NM_000181    | GUSB     | 1297 | 1364 | 8.03355502042       |
| NM_000181    | GUSB     | 1541 | 1593 | 8.03355502042       |
| NM_000181    | GUSB     | 766  | 796  | 7.61851079009       |
| NM_000181    | GUSB     | 388  | 480  | 8.03355502042       |
| NM_000181    | GUSB     | 1601 | 1639 | 8.20347329081       |
| NM_000181    | GUSB     | 842  | 889  | 7.02953742025       |
| NM_000181    | GUSB     | 690  | 734  | 7.75677073309       |
| NM_000181    | GUSB     | 480  | 508  | 6.53437831176       |
| NM_000181    | GUSB     | 1648 | 1678 | 4.94941581104       |
| NM_000181    | GUSB     | 1413 | 1532 | 9.20348002186       |
| NM_000181    | GUSB     | 162  | 215  | 7.02953742025       |
| NM_000181    | GUSB     | 932  | 985  | 7.35547638425       |
| NM_000181    | GUSB     | 1048 | 1133 | 7.84090994226       |
| NM_000181    | GUSB     | 1737 | 1910 | 9.49298663906       |
| NM_000181    | GUSB     | 241  | 344  | 8.20348002186       |
| NM_000185    | SERPIND1 |      | 994  | 1021 0.773886687893 |

|              |          |      |      |     |                 |
|--------------|----------|------|------|-----|-----------------|
| NM_000185    | SERPIND1 |      | 265  | 311 | 3.09983214704   |
| NM_000189    | HK2      | 1268 | 1293 |     | 3.50000238734   |
| NM_003183    | ADAM17   | 1661 | 1687 |     | 5.80125266999   |
| NM_000980    | RPL18A   | 279  | 344  |     | 4.0294350408    |
| NM_000981    | RPL19    | 332  | 395  |     | 0.458004041856  |
| NM_000986    | RPL24    | 170  | 213  |     | -0.203214022816 |
| NM_000984    | RPL23A   | 432  | 488  |     | 1.67382756172   |
| NM_000984    | RPL23A   | 151  | 216  |     | 2.67382756927   |
| NM_000984    | RPL23A   | 341  | 431  |     | 2.03639764866   |
| NM_000985    | RPL17    | 212  | 278  |     | 6.90228644341   |
| NM_002902    | RCN2     | 411  | 470  |     | 3.72141222762   |
| NM_002902    | RCN2     | 585  | 654  |     | 4.13662347722   |
| NM_002902    | RCN2     | 1042 | 1118 |     | 1.13662346967   |
| NM_002052    | GATA4    | 3018 | 3060 |     | 6.39150235018   |
| NM_005907    | MAN1A1   | 5    | 77   |     | 3.74105974132   |
| NM_005907    | MAN1A1   | 136  | 191  |     | 5.32584849194   |
| NM_005907    | MAN1A1   | 2068 | 2155 |     | 6.40402475426   |
| NM_005907    | MAN1A1   | 396  | 449  |     | 5.85653695896   |
| NM_005907    | MAN1A1   | 232  | 266  |     | 4.15609050976   |
| NM_005907    | MAN1A1   | 1930 | 2035 |     | 5.74105974154   |
| NM_005907    | MAN1A1   | 1014 | 1070 |     | 5.15609724059   |
| NM_005907    | MAN1A1   | 320  | 356  |     | 3.15207964064   |
| NM_005907    | MAN1A1   | 1803 | 1851 |     | 5.4780253357    |
| NM_005907    | MAN1A1   | 81   | 129  |     | 5.32602224225   |
| NM_005907    | MAN1A1   | 2284 | 2341 |     | 6.79995343059   |
| NM_005907    | MAN1A1   | 1410 | 1505 |     | 6.40402475426   |
| NM_005907    | MAN1A1   | 498  | 541  |     | 4.47400773553   |
| NM_005907    | MAN1A1   | 1084 | 1126 |     | 3.74088599122   |
| NM_005907    | MAN1A1   | 542  | 590  |     | 4.47801860465   |
| NM_005907    | MAN1A1   | 1624 | 1798 |     | 6.91098474298   |
| NM_005907    | MAN1A1   | 1327 | 1407 |     | 4.96345216287   |
| NM_005907    | MAN1A1   | 1146 | 1216 |     | 4.15609724081   |
| NM_138333    | FAM122A  | 178  | 209  |     | 9.39438702285   |
| NM_002582    | PARN     | 101  | 124  |     | 5.90345331578   |
| NM_181783    | TMTC3    | 1592 | 1613 |     | 10.4494176764   |
| NM_002587    | PCDH1    | 2360 | 2400 |     | 11.1473401477   |
| NM_002276    | KRT19    | 853  | 913  |     | 5.78030728376   |
| NM_002273    | KRT8     | 791  | 847  |     | 3.71560407059   |
| NM_002273    | KRT8     | 1468 | 1557 |     | 4.09411569385   |
| NM_002273    | KRT8     | 301  | 339  |     | 2.97462087626   |
| NM_002273    | KRT8     | 578  | 684  |     | 3.56360097715   |
| NM_002273    | KRT8     | 1213 | 1332 |     | 3.97863847643   |
| NM_002273    | KRT8     | 853  | 1054 |     | 5.39367597571   |
| NM_001166168 | NEK6     | 2    | 23   |     | 3.87781695163   |
| NM_005581    | BCAM     | 2397 | 2437 |     | 4.50525945674   |
| NM_005581    | BCAM     | 1067 | 1117 |     | 4.58939193507   |
| NM_005588    | MEP1A    | 914  | 964  |     | 10.0282445529   |
| NM_005588    | MEP1A    | 1702 | 1756 |     | 10.7063164581   |
| NM_005588    | MEP1A    | 532  | 581  |     | 9.29111193951   |
| NM_005588    | MEP1A    | 412  | 443  |     | 8.62218397973   |

|              |         |      |      |                |
|--------------|---------|------|------|----------------|
| NM_001164754 | ASPH    | 919  | 971  | 2.49038171668  |
| NM_001164754 | ASPH    | 240  | 273  | 0.825297606752 |
| NM_001164754 | ASPH    | 810  | 885  | 5.55329300591  |
| NM_001164754 | ASPH    | 1203 | 1247 | 2.90943008508  |
| NM_001164754 | ASPH    | 666  | 721  | 3.22734731085  |
| NM_001164754 | ASPH    | 723  | 804  | 3.90943681614  |
| NM_001164754 | ASPH    | 1042 | 1122 | 3.23136491102  |
| NM_001164754 | ASPH    | 537  | 621  | 4.36886843477  |
| NM_001164754 | ASPH    | 376  | 531  | 5.15736432958  |
| NM_006148    | LASP1   | 2243 | 2292 | 4.86138433041  |
| NM_012308    | KDM2A   | 2890 | 2981 | 7.35834519987  |
| NM_012308    | KDM2A   | 79   | 102  | 5.68925022082  |
| NM_144604    | ZC3H18  | 332  | 351  | 5.30894214228  |
| NM_005724    | TSPAN3  | 641  | 695  | 6.42584354416  |
| NM_018083    | ZNF358  | 65   | 86   | 9.02563153731  |
| NM_018086    | FIGN    | 3960 | 3982 | 8.89723509696  |
| NM_018087    | TMEM48  | 1102 | 1141 | 7.79000312791  |
| NM_001172335 | PLS3    | 1882 | 1912 | 4.83621873418  |
| NM_001009813 | MEIS3   | 196  | 228  | 11.001965739   |
| NM_130445    | COL18A1 | 3717 | 3783 | 8.55787671426  |
| NM_130445    | COL18A1 | 3892 | 3955 | 7.90580001768  |
| NM_130445    | COL18A1 | 695  | 723  | 6.01430588623  |
| NM_130445    | COL18A1 | 958  | 1016 | 6.68340736042  |
| NM_130445    | COL18A1 | 223  | 263  | 7.82166080829  |
| NM_130445    | COL18A1 | 2752 | 2838 | 7.42037319028  |
| NM_130445    | COL18A1 | 748  | 825  | 7.42037319051  |
| NM_130445    | COL18A1 | 382  | 442  | 6.09442749545  |
| NM_130445    | COL18A1 | 2174 | 2250 | 7.4203731905   |
| NM_130445    | COL18A1 | 2435 | 2543 | 7.68340759633  |
| NM_130445    | COL18A1 | 1839 | 1906 | 8.26837008951  |
| NM_130445    | COL18A1 | 1970 | 2045 | 5.09442749545  |
| NM_130445    | COL18A1 | 1435 | 1509 | 7.09844509561  |
| NM_130440    | PTPRF   | 3523 | 3560 | 7.27629965534  |
| NM_130440    | PTPRF   | 3327 | 3425 | 8.27647340566  |
| NM_130440    | PTPRF   | 2569 | 2637 | 7.63904348503  |
| NM_130440    | PTPRF   | 2039 | 2099 | 8.37600907921  |
| NM_130440    | PTPRF   | 1685 | 1733 | 7.05408097677  |
| NM_130440    | PTPRF   | 1329 | 1377 | 4.46894473328  |
| NM_130440    | PTPRF   | 3829 | 3865 | 4.46911824768  |
| NM_130440    | PTPRF   | 5964 | 6015 | 6.79087282817  |
| NM_130440    | PTPRF   | 3727 | 3803 | 6.46894473328  |
| NM_130440    | PTPRF   | 2276 | 2319 | 6.78702897831  |
| NM_130440    | PTPRF   | 7069 | 7115 | 7.05408097677  |
| NM_130440    | PTPRF   | 450  | 499  | 6.78702897831  |
| NM_130440    | PTPRF   | 4310 | 4342 | 5.96994177494  |
| NM_130440    | PTPRF   | 5059 | 5113 | 6.05407425327  |
| NM_130440    | PTPRF   | 97   | 232  | 7.05408098432  |
| NM_130440    | PTPRF   | 4195 | 4260 | 4.46911847605  |
| NM_130440    | PTPRF   | 2329 | 2409 | 7.4691184836   |
| NM_130440    | PTPRF   | 263  | 343  | 7.92855010224  |

|              |                |      |       |                   |
|--------------|----------------|------|-------|-------------------|
| NM_022465    | IKZF4          | 366  | 391   | 9.87949387317     |
| NM_022464    | SIL1           | 724  | 749   | 6.75632491037     |
| NM_022464    | SIL1           | 974  | 1012  | 7.49329050453     |
| NM_001032    | RPS29          | 217  | 260   | 2.01997135361     |
| NM_001142305 | ZNF771         | 159  | 185   | 11.4119720314     |
| NM_001116    | ADCY9          | 2155 | 2216  | 7.19339694579     |
| NM_001116    | ADCY9          | 52   | 84    | 6.10926446746     |
| NM_001116    | ADCY9          | 2043 | 2099  | 7.19339694579     |
| NM_001110    | ADAM10         | 786  | 839   | 6.33589887707     |
| NM_001110    | ADAM10         | 2231 | 2265  | 3.66679717451     |
| NM_001110    | ADAM10         | 1322 | 1365  | 7.07286424287     |
| NM_001110    | ADAM10         | 1033 | 1082  | 6.92086138512     |
| NM_001110    | ADAM10         | 1839 | 1907  | 6.92086138512     |
| NM_001110    | ADAM10         | 873  | 915   | 6.07286447879     |
| NM_001110    | ADAM10         | 1793 | 1837  | 5.66679717451     |
| NM_001110    | ADAM10         | 2365 | 2406  | 5.33589215357     |
| NM_001110    | ADAM10         | 2443 | 2531  | 6.7509363839      |
| NM_001110    | ADAM10         | 1994 | 2092  | 7.21036800254     |
| NM_001110    | ADAM10         | 2133 | 2199  | 6.92086114942     |
| NM_001199535 | TGIF2-C200RF24 | 483  | 509   | 6.92954534816     |
| NM_016489    | NT5C3          | 706  | 735   | 5.61309291536     |
| NM_016489    | NT5C3          | 886  | 935   | 6.60908204624     |
| NM_016077    | PTRH2          | 551  | 578   | 5.61614912739     |
| NM_015937    | PIGT           | 1153 | 1191  | 8.09821395684     |
| NM_015932    | POMP           | 490  | 540   | 6.56111701838     |
| NM_001242534 | MFSD11         | 1449 | 1517  | 9.67225746298     |
| NM_017684    | VPS13C         | 9977 | 10008 | 8.8316505893      |
| NM_025099    | CTC1           | 4838 | 4860  | 11.0477691455     |
| NM_025099    | CTC1           | 4870 | 4893  | 10.3108035514     |
| NM_025099    | CTC1           | 5201 | 5234  | 11.3109773017     |
| NM_025099    | CTC1           | 5260 | 5286  | 10.3069597015     |
| NM_024324    | CRELD2         | 994  | 1031  | 7.24491374248     |
| NM_024324    | CRELD2         | 484  | 550   | 8.24492023761     |
| NM_024324    | CRELD2         | 749  | 842   | 9.41484547497     |
| NM_001193417 | DDX3X          | 1723 | 1764  | 5.35522108841     |
| NM_003516    | HIST2H2AA3     |      | 316   | 358 5.90393945011 |
| NM_003045    | SLC7A1         | 1708 | 1743  | 8.68022836644     |
| NM_003045    | SLC7A1         | 1247 | 1284  | 8.68022836622     |
| NM_003045    | SLC7A1         | 830  | 884   | 8.48758328095     |
| NM_003045    | SLC7A1         | 662  | 740   | 6.68022163539     |
| NM_003045    | SLC7A1         | 2231 | 2264  | 7.59608915706     |
| NM_003045    | SLC7A1         | 999  | 1099  | 8.4875832885      |
| NM_003045    | SLC7A1         | 1559 | 1629  | 9.38066808458     |
| NM_003045    | SLC7A1         | 1372 | 1435  | 8.00215622541     |
| NM_001139457 | BCAP31         | 1193 | 1246  | 5.56267659271     |
| NM_001139457 | BCAP31         | 959  | 1013  | 5.20010651332     |
| NM_001139457 | BCAP31         | 1441 | 1492  | 4.30861238188     |
| NM_001139457 | BCAP31         | 1067 | 1100  | 2.38873399109     |
| NM_001139457 | BCAP31         | 1109 | 1193  | 6.64067910471     |
| NM_001139457 | BCAP31         | 792  | 924   | 6.78506901404     |



|              |         |      |      |               |
|--------------|---------|------|------|---------------|
| NM_001139457 | BCAP31  | 1330 | 1382 | 3.97771409176 |
| NM_001127662 | GSN     | 540  | 637  | 3.46223356409 |
| NM_001127662 | GSN     | 2142 | 2215 | 3.87727105582 |
| NM_001127662 | GSN     | 363  | 418  | 4.04718933376 |
| NM_001127662 | GSN     | 154  | 209  | 2.79313185398 |
| NM_005308    | GRK5    | 21   | 56   | 5.77802285073 |
| NM_015447    | CAMSAP1 | 2    | 25   | 8.07275841705 |
| NM_012207    | HNRNPH3 | 602  | 621  | 3.68458134993 |
| NM_052916    | RNF157  | 866  | 888  | 12.6307989694 |
| NM_001344    | DAD1    | 228  | 275  | 6.1596066126  |
| NM_001348    | DAPK3   | 654  | 700  | 6.70285753502 |
| NM_022075    | CERS2   | 1401 | 1450 | 7.4192299704  |
| NM_022075    | CERS2   | 2134 | 2189 | 5.30375251728 |
| NM_022075    | CERS2   | 571  | 625  | 6.30375275298 |
| NM_022075    | CERS2   | 675  | 736  | 5.30357900288 |
| NM_022075    | CERS2   | 1061 | 1121 | 7.62568084809 |
| NM_022075    | CERS2   | 371  | 494  | 7.80625309373 |
| NM_022075    | CERS2   | 509  | 568  | 5.71879024493 |
| NM_022075    | CERS2   | 1174 | 1246 | 7.3037527532  |
| NM_022075    | CERS2   | 198  | 249  | 5.71879025248 |
| NM_021259    | TMEM8A  | 1524 | 1601 | 7.56756660788 |
| NM_014437    | SLC39A1 | 1063 | 1112 | 9.23812940936 |
| NM_014437    | SLC39A1 | 1016 | 1052 | 7.64932305879 |
| NM_014437    | SLC39A1 | 1146 | 1286 | 10.5602312546 |
| NM_004733    | SLC33A1 | 909  | 945  | 8.49855799263 |
| NM_004733    | SLC33A1 | 1154 | 1187 | 9.0873643432  |
| NM_004733    | SLC33A1 | 1430 | 1473 | 8.49855799263 |
| NM_004733    | SLC33A1 | 978  | 1028 | 8.50240184248 |
| NM_004733    | SLC33A1 | 819  | 895  | 10.0875378576 |
| NM_004086    | COCH    | 1562 | 1601 | 7.60999376775 |
| NM_004086    | COCH    | 1115 | 1148 | 6.94490965782 |
| NM_004086    | COCH    | 886  | 930  | 6.02503126703 |
| NM_004086    | COCH    | 1259 | 1292 | 8.6138376176  |
| NM_004086    | COCH    | 628  | 684  | 9.93593946281 |
| NM_004086    | COCH    | 1004 | 1054 | 6.02887511688 |
| NM_001164232 | DDHD2   | 771  | 790  | 5.31161168261 |
| NM_000340    | SLC2A2  | 938  | 988  | 8.64027478695 |
| NM_000340    | SLC2A2  | 1449 | 1481 | 8.37741412388 |
| NM_000340    | SLC2A2  | 539  | 578  | 8.64044180621 |
| NM_000434    | NEU1    | 1383 | 1419 | 7.86914130872 |
| NM_000434    | NEU1    | 1058 | 1140 | 10.2614654626 |
| NM_000434    | NEU1    | 1169 | 1209 | 8.67650296182 |
| NM_000434    | NEU1    | 800  | 855  | 10.1910761347 |
| NM_000434    | NEU1    | 1426 | 1502 | 9.67650296183 |
| NM_000434    | NEU1    | 1694 | 1758 | 8.45009294032 |
| NM_000434    | NEU1    | 541  | 607  | 9.45411054049 |
| NM_000434    | NEU1    | 999  | 1053 | 7.45009294032 |
| NM_000434    | NEU1    | 726  | 771  | 7.86897428945 |
| NM_000434    | NEU1    | 192  | 387  | 10.1170755532 |
| NM_006827    | TMED10  | 503  | 545  | 6.50763474167 |

|              |          |      |      |                    |
|--------------|----------|------|------|--------------------|
| NM_006827    | TMED10   | 190  | 288  | 6.09259724239      |
| NM_006827    | TMED10   | 612  | 681  | 6.67755974311      |
| NM_006827    | TMED10   | 349  | 481  | 7.89995216445      |
| NM_006825    | CKAP4    | 1215 | 1270 | 6.3311299439       |
| NM_006825    | CKAP4    | 663  | 719  | 5.65305130796      |
| NM_006825    | CKAP4    | 1791 | 1875 | 6.13848486618      |
| NM_006825    | CKAP4    | 1656 | 1710 | 6.13848485863      |
| NM_006825    | CKAP4    | 1279 | 1365 | 6.65305803901      |
| NM_006825    | CKAP4    | 144  | 187  | 4.24699073474      |
| NM_006825    | CKAP4    | 1721 | 1787 | 5.33112994412      |
| NM_006825    | CKAP4    | 742  | 818  | 6.33112994412      |
| NM_001168236 | ABL2     | 18   | 52   | 10.2045800563      |
| NM_004886    | APBA3    | 11   | 31   | 10.7705152864      |
| NM_020120    | UGGT1    | 2969 | 3044 | 5.66561001502      |
| NM_020120    | UGGT1    | 3810 | 3881 | 6.88800244391      |
| NM_020120    | UGGT1    | 1783 | 1839 | 6.66561002257      |
| NM_020120    | UGGT1    | 638  | 701  | 6.08047377153      |
| NM_020120    | UGGT1    | 2045 | 2102 | 6.8880024439       |
| NM_020120    | UGGT1    | 3457 | 3519 | 6.0806407908       |
| NM_020120    | UGGT1    | 1401 | 1445 | 6.31843640735      |
| NM_020120    | UGGT1    | 3674 | 3711 | 7.25057251574      |
| NM_020120    | UGGT1    | 2466 | 2516 | 4.99650831247      |
| NM_020120    | UGGT1    | 1260 | 1315 | 6.31843640735      |
| NM_020120    | UGGT1    | 1872 | 1962 | 6.88800244391      |
| NM_020121    | UGGT2    | 3777 | 3810 | 6.26952489892      |
| NM_020121    | UGGT2    | 3239 | 3277 | 5.26952489892      |
| NM_003645    | SLC27A2  | 581  | 614  | 6.30128763769      |
| NM_003645    | SLC27A2  | 442  | 491  | 5.30146115209      |
| NM_003645    | SLC27A2  | 1225 | 1282 | 8.30146115209      |
| NM_003645    | SLC27A2  | 1427 | 1515 | 9.00190110615      |
| NM_181836    | TMED7    | 840  | 895  | 8.93427071479      |
| NM_181836    | TMED7    | 492  | 553  | 7.71262798188      |
| NM_020342    | SLC39A10 |      | 1638 | 1680 6.45764803045 |
| NM_020342    | SLC39A10 |      | 1037 | 1063 8.18086397904 |
| NM_020348    | CNNM1    | 335  | 414  | 12.160822059       |
| NM_182917    | EIF4G1   | 3911 | 3964 | 5.53002681676      |
| NM_182917    | EIF4G1   | 5308 | 5363 | 4.53020033116      |
| NM_182917    | EIF4G1   | 2907 | 2961 | 6.40466968477      |
| NM_182917    | EIF4G1   | 2317 | 2349 | 5.26699241093      |
| NM_182917    | EIF4G1   | 4865 | 4930 | 3.94506431604      |
| NM_002074    | GNB1     | 54   | 105  | 5.92285592666      |
| NM_002076    | GNS      | 760  | 796  | 7.47763422426      |
| NM_002076    | GNS      | 822  | 886  | 6.25524180293      |
| NM_002076    | GNS      | 489  | 525  | 6.91208578788      |
| NM_002076    | GNS      | 288  | 387  | 6.25524180293      |
| NM_002076    | GNS      | 1479 | 1508 | 5.67429017133      |
| NM_002076    | GNS      | 1772 | 1863 | 7.25925916718      |
| NM_006487    | FBLN1    | 1718 | 1751 | 6.15244105974      |
| NM_006487    | FBLN1    | 1558 | 1612 | 7.65494140027      |
| NM_006487    | FBLN1    | 1805 | 1840 | 6.14842345957      |

|              |          |      |      |                    |
|--------------|----------|------|------|--------------------|
| NM_006487    | FBLN1    | 749  | 789  | 7.56747855902      |
| NM_006487    | FBLN1    | 245  | 352  | 8.52167486941      |
| NM_006487    | FBLN1    | 1384 | 1467 | 8.2113347488       |
| NM_006487    | FBLN1    | 820  | 1018 | 9.49821589659      |
| NM_006487    | FBLN1    | 1117 | 1355 | 9.49821589659      |
| NM_006487    | FBLN1    | 537  | 704  | 8.77693192465      |
| NM_145167    | PIGM     | 736  | 772  | 11.4121766929      |
| NM_006513    | SARS     | 181  | 247  | 3.20589759018      |
| NM_001004128 | QS0X1    | 1614 | 1659 | 7.86361092085      |
| NM_014982    | PCNX     | 404  | 435  | 6.80206904116      |
| NM_005708    | GPC6     | 1080 | 1156 | 10.0439036078      |
| NM_005708    | GPC6     | 931  | 985  | 8.90622634132      |
| NM_005708    | GPC6     | 2188 | 2226 | 7.50033278737      |
| NM_005708    | GPC6     | 1521 | 1546 | 6.58045439658      |
| NM_005700    | DPP3     | 1338 | 1359 | 7.97635114132      |
| NM_005700    | DPP3     | 2175 | 2221 | 8.20276115528      |
| NM_176877    | INADL    | 3845 | 3879 | 8.36480647007      |
| NM_001139490 | TRAF3IP1 |      | 10   | 37 6.8250612125    |
| NM_001287    | CLCN7    | 1244 | 1298 | 7.44076852251      |
| NM_001288    | CLIC1    | 52   | 105  | 4.08279632923      |
| NM_001288    | CLIC1    | 756  | 807  | 3.66776556101      |
| NM_001288    | CLIC1    | 108  | 144  | 1.9986638509       |
| NM_001288    | CLIC1    | 280  | 385  | 4.89015798234      |
| NM_001288    | CLIC1    | 542  | 601  | 3.40473115495      |
| NM_001288    | CLIC1    | 399  | 437  | 2.66775882995      |
| NM_015584    | POLDIP2  | 65   | 87   | 6.71586710196      |
| NM_016176    | SDF4     | 1134 | 1165 | 3.20822785708      |
| NM_016176    | SDF4     | 1042 | 1088 | 3.62343909913      |
| NM_016176    | SDF4     | 141  | 208  | 5.08287072531      |
| NM_016176    | SDF4     | 1287 | 1345 | 4.7933638722       |
| NM_016176    | SDF4     | 795  | 836  | 4.12426239801      |
| NM_016176    | SDF4     | 689  | 734  | 1.6194215065       |
| NM_016176    | SDF4     | 488  | 542  | 3.94536047051      |
| NM_016176    | SDF4     | 872  | 902  | 3.6194215065       |
| NM_016176    | SDF4     | 398  | 471  | 4.94536720156      |
| NM_016176    | SDF4     | 762  | 787  | 2.53929989729      |
| NM_016176    | SDF4     | 1375 | 1413 | 2.53929989729      |
| NM_016176    | SDF4     | 1215 | 1284 | 3.94536720156      |
| NM_016176    | SDF4     | 581  | 643  | 4.94536720156      |
| NM_016176    | SDF4     | 1560 | 1637 | 3.94536696565      |
| NM_006516    | SLC2A1   | 1495 | 1562 | 5.90779413803      |
| NM_006516    | SLC2A1   | 1820 | 1864 | 6.78225676081      |
| NM_006516    | SLC2A1   | 1213 | 1259 | 5.32283186568      |
| NM_001756    | SERPINA6 |      | 64   | 136 7.9921633404   |
| NM_001756    | SERPINA6 |      | 1253 | 1286 8.22995246183 |
| NM_001756    | SERPINA6 |      | 752  | 792 8.16208857754  |
| NM_001756    | SERPINA6 |      | 1334 | 1378 4.991989826   |
| NM_001756    | SERPINA6 |      | 375  | 418 7.79934474806  |
| NM_001756    | SERPINA6 |      | 1019 | 1077 6.57712607704 |
| NM_001756    | SERPINA6 |      | 1083 | 1163 7.57712607704 |

|              |           |      |      |      |                 |
|--------------|-----------|------|------|------|-----------------|
| NM_001756    | SERPINA6  |      | 832  | 951  | 9.45159519496   |
| NM_015913    | TXNDC12   | 1495 | 1559 |      | 5.81992392479   |
| NM_015913    | TXNDC12   | 1322 | 1400 |      | 6.58196128897   |
| NM_001134    | AFP       | 551  | 630  |      | 1.48080705571   |
| NM_001134    | AFP       | 710  | 777  |      | 1.29439393148   |
| NM_001134    | AFP       | 1333 | 1414 |      | 1.29439393148   |
| NM_001134    | AFP       | 1126 | 1156 |      | -1.06276377231  |
| NM_001134    | AFP       | 1881 | 1952 |      | 0.436412936353  |
| NM_001134    | AFP       | 83   | 136  |      | -0.978624563148 |
| NM_001134    | AFP       | 136  | 187  |      | 0.343303531961  |
| NM_001134    | AFP       | 1280 | 1312 |      | -0.978624798845 |
| NM_001134    | AFP       | 1728 | 1871 |      | 2.6843404498    |
| NM_001134    | AFP       | 1604 | 1716 |      | 2.6063379378    |
| NM_001134    | AFP       | 222  | 537  |      | 3.74929589164   |
| NM_001134    | AFP       | 809  | 1031 |      | 2.94420757655   |
| NM_001134    | AFP       | 1425 | 1554 |      | 2.5656959533    |
| NM_001134    | AFP       | 1156 | 1278 |      | 2.19130043852   |
| NM_001135162 | COMT      | 472  | 555  |      | 8.58363137417   |
| NM_001135162 | COMT      | 676  | 740  |      | 7.22106129478   |
| NM_001135162 | COMT      | 759  | 811  |      | 6.99866887322   |
| NM_001135162 | COMT      | 441  | 469  |      | 5.32956716334   |
| NM_001135162 | COMT      | 634  | 674  |      | 6.73563423169   |
| NM_001135162 | COMT      | 255  | 347  |      | 6.73563446761   |
| NM_001135162 | COMT      | 951  | 997  |      | 6.32956716334   |
| NM_001135162 | COMT      | 815  | 896  |      | 6.73563446761   |
| NM_007364    | TMED3     | 526  | 578  |      | 9.26567476446   |
| NM_007364    | TMED3     | 633  | 679  |      | 7.26567476424   |
| NM_007364    | TMED3     | 420  | 469  |      | 6.52870243924   |
| NM_000661    | RPL9      | 52   | 158  |      | 1.71400118659   |
| NM_000660    | TGFB1     | 1705 | 1776 |      | 7.03482470137   |
| NM_000660    | TGFB1     | 549  | 598  |      | 6.95069222304   |
| NM_024874    | KIAA0319L |      | 1175 | 1209 | 9.12107281404   |
| NM_004949    | DSC2      | 1226 | 1282 |      | 7.62991966577   |
| NM_178582    | HM13      | 77   | 169  |      | 10.5302180924   |
| NM_178582    | HM13      | 444  | 497  |      | 10.6677216162   |
| NM_178582    | HM13      | 383  | 425  |      | 9.53021136137   |
| NM_006013    | RPL10     | 205  | 259  |      | 1.79814478609   |
| NM_006013    | RPL10     | 693  | 742  |      | 3.38310728681   |
| NM_139125    | MASP1     | 1389 | 1419 |      | 7.55443464175   |
| NM_139125    | MASP1     | 1464 | 1501 |      | 7.13922362808   |
| NM_139125    | MASP1     | 1080 | 1115 |      | 7.13922362808   |
| NM_139125    | MASP1     | 2545 | 2579 |      | 7.5504172775    |
| NM_139125    | MASP1     | 613  | 667  |      | 7.13939737839   |
| NM_139125    | MASP1     | 793  | 851  |      | 8.72435987911   |
| NM_139125    | MASP1     | 1342 | 1386 |      | 8.87636297234   |
| NM_139125    | MASP1     | 1420 | 1458 |      | 8.72435987911   |
| NM_139125    | MASP1     | 915  | 986  |      | 8.13939737839   |
| NM_006017    | PROM1     | 1555 | 1603 |      | 9.05091500413   |
| NM_006017    | PROM1     | 782  | 842  |      | 8.82852258279   |
| NM_006017    | PROM1     | 1726 | 1779 |      | 9.94399980021   |

|              |         |      |      |               |
|--------------|---------|------|------|---------------|
| NM_006017    | PROM1   | 2259 | 2316 | 8.24355984615 |
| NM_006017    | PROM1   | 870  | 966  | 9.41348508351 |
| NM_006017    | PROM1   | 1319 | 1356 | 8.2395424819  |
| NM_006017    | PROM1   | 2648 | 2713 | 10.3310229233 |
| NM_006017    | PROM1   | 598  | 645  | 8.82852258257 |
| NM_006017    | PROM1   | 1500 | 1548 | 7.82450498262 |
| NM_006017    | PROM1   | 2520 | 2575 | 9.9439998002  |
| NM_006017    | PROM1   | 1624 | 1682 | 7.24355984615 |
| NM_006017    | PROM1   | 1910 | 1946 | 8.15942087269 |
| NM_006017    | PROM1   | 2319 | 2381 | 8.56548817696 |
| NM_006017    | PROM1   | 539  | 589  | 8.2395424819  |
| NM_006017    | PROM1   | 1142 | 1302 | 10.0509150041 |
| NM_006017    | PROM1   | 1803 | 1854 | 8.56548817696 |
| NM_006017    | PROM1   | 1994 | 2026 | 6.15942087269 |
| NM_006017    | PROM1   | 991  | 1035 | 8.82834883247 |
| NM_006017    | PROM1   | 2413 | 2498 | 9.94399980021 |
| NM_006017    | PROM1   | 2060 | 2150 | 9.41348508351 |
| NM_006018    | HCAR3   | 427  | 468  | 11.0785860484 |
| NM_006019    | TCIRG1  | 1524 | 1566 | 10.4536734625 |
| NM_006019    | TCIRG1  | 274  | 315  | 10.7205517182 |
| NM_006019    | TCIRG1  | 1876 | 1925 | 10.1357627319 |
| NM_006019    | TCIRG1  | 2464 | 2515 | 11.1357629678 |
| NM_006019    | TCIRG1  | 2530 | 2591 | 9.13174536763 |
| NM_006019    | TCIRG1  | 183  | 233  | 10.9391002897 |
| NM_001206665 | IGSF8   | 1371 | 1417 | 8.84358823116 |
| NM_001079812 | DIAPH1  | 4392 | 4455 | 6.15495623262 |
| NM_001079818 | ITGA6   | 3266 | 3303 | 6.60296805551 |
| NM_001079818 | ITGA6   | 3138 | 3159 | 4.68308966472 |
| NM_001079818 | ITGA6   | 2970 | 3011 | 6.85703226634 |
| NM_032451    | SPIRE2  | 1639 | 1698 | 8.21630349819 |
| NM_001127641 | LAMB3   | 3538 | 3581 | 13.8809681454 |
| NM_001127641 | LAMB3   | 1707 | 1742 | 14.6179337395 |
| NM_001127641 | LAMB3   | 3211 | 3256 | 13.2120401856 |
| NM_001127641 | LAMB3   | 1250 | 1286 | 12.2921617948 |
| NM_001127641 | LAMB3   | 3042 | 3127 | 13.8811418881 |
| NM_013349    | NENF    | 551  | 598  | 5.00486835896 |
| NM_013402    | FADS1   | 1158 | 1232 | 11.3342217974 |
| NM_013404    | MSLN    | 1680 | 1776 | 12.5712610023 |
| NM_013404    | MSLN    | 1826 | 1876 | 12.3080528461 |
| NM_005933    | MLL     | 195  | 227  | 7.08862202334 |
| NM_005934    | MLLT1   | 2394 | 2425 | 8.22205479358 |
| NM_018981    | DNAJC10 | 1062 | 1095 | 6.43837077633 |
| NM_018984    | SSH1    | 3381 | 3404 | 9.34624073879 |
| NM_052932    | TMEM123 | 571  | 624  | 3.43998408016 |
| NM_052932    | TMEM123 | 2086 | 2107 | 0.18591986933 |
| NM_052932    | TMEM123 | 880  | 956  | 2.27005907871 |
| NM_052932    | TMEM123 | 370  | 492  | 2.5919871736  |
| NM_001170795 | C2orf28 | 233  | 274  | 4.31039677132 |
| NM_080546    | SLC44A1 | 1677 | 1700 | 6.77811168287 |
| NM_012112    | TPX2    | 2861 | 2927 | 6.49287444619 |

|           |          |      |      |                    |
|-----------|----------|------|------|--------------------|
| NM_012112 | TPX2     | 2141 | 2199 | 5.67194339296      |
| NM_012449 | STEAP1   | 831  | 940  | 6.76561362888      |
| NM_174936 | PCSK9    | 414  | 488  | 10.2051054151      |
| NM_174936 | PCSK9    | 811  | 850  | 7.88317732026      |
| NM_174936 | PCSK9    | 231  | 279  | 9.12096621331      |
| NM_174936 | PCSK9    | 1392 | 1453 | 7.87915972763      |
| NM_174936 | PCSK9    | 713  | 769  | 7.88317059675      |
| NM_182551 | LCLAT1   | 574  | 620  | 11.7182341353      |
| NM_015020 | PHLPP2   | 5574 | 5594 | 8.44818760831      |
| NM_173587 | RCOR2    | 893  | 913  | 7.41027124517      |
| NM_004710 | SYNGR2   | 570  | 632  | 8.61872019132      |
| NM_004710 | SYNGR2   | 537  | 560  | 8.95363608139      |
| NM_004710 | SYNGR2   | 336  | 398  | 8.62273755557      |
| NM_015024 | XP07     | 13   | 38   | 6.83007088743      |
| NM_000416 | IFNGR1   | 1156 | 1223 | 6.9155881855       |
| NM_006844 | ILVBL    | 760  | 804  | 8.51495922396      |
| NM_006844 | ILVBL    | 1181 | 1238 | 7.93017023764      |
| NM_006844 | ILVBL    | 646  | 721  | 8.93017047356      |
| NM_006841 | SLC38A3  | 1189 | 1276 | 6.32490137941      |
| NM_006842 | SF3B2    | 1513 | 1553 | 4.00379395315      |
| NM_006842 | SF3B2    | 2064 | 2125 | 3.00379395315      |
| NM_006842 | SF3B2    | 1789 | 1846 | 4.50863484466      |
| NM_005177 | ATP6V0A1 |      | 1736 | 1771 7.90162836425 |
| NM_005177 | ATP6V0A1 |      | 2263 | 2293 8.14343484993 |
| NM_005177 | ATP6V0A1 |      | 1943 | 1972 6.82150675504 |
| NM_005177 | ATP6V0A1 |      | 1590 | 1666 7.90564596442 |
| NM_000351 | STS      | 3840 | 3864 | 12.2855853958      |
| NM_020360 | PLSCR3   | 259  | 281  | 11.0189232971      |
| NM_144580 | C1orf85  | 249  | 293  | 8.95693253772      |
| NM_144580 | C1orf85  | 822  | 876  | 11.1308751393      |
| NM_144580 | C1orf85  | 486  | 554  | 8.96094340684      |
| NM_144580 | C1orf85  | 1263 | 1353 | 11.2828782328      |
| NM_006810 | PDIA5    | 1486 | 1532 | 3.77817723714      |
| NM_006810 | PDIA5    | 844  | 873  | 6.36313973786      |
| NM_000358 | TGFBI    | 684  | 719  | 4.05178453477      |
| NM_000358 | TGFBI    | 1971 | 2039 | 5.78892387926      |
| NM_000358 | TGFBI    | 763  | 827  | 6.63692078581      |
| NM_000358 | TGFBI    | 300  | 340  | 5.27435070643      |
| NM_000358 | TGFBI    | 2133 | 2204 | 4.78892364334      |
| NM_000358 | TGFBI    | 1330 | 1435 | 5.78892387926      |
| NM_000358 | TGFBI    | 2064 | 2124 | 6.71492329781      |
| NM_000358 | TGFBI    | 401  | 447  | 5.27435070643      |
| NM_000358 | TGFBI    | 884  | 973  | 7.3249767795       |
| NM_000358 | TGFBI    | 1284 | 1325 | 5.92642740301      |
| NM_000358 | TGFBI    | 616  | 641  | 2.46699554845      |
| NM_000358 | TGFBI    | 2265 | 2299 | 2.38285657499      |
| NM_000358 | TGFBI    | 471  | 563  | 6.99055774043      |
| NM_000358 | TGFBI    | 2720 | 2775 | 2.46682203405      |
| NM_000358 | TGFBI    | 1004 | 1189 | 8.16743550251      |
| NM_000358 | TGFBI    | 1877 | 1953 | 5.46699578437      |

|              |          |      |      |                 |               |
|--------------|----------|------|------|-----------------|---------------|
| NM_000358    | TGFBI    | 1563 | 1697 | 7.3249767795    |               |
| NM_000358    | TGFBI    | 1701 | 1877 | 7.11085197414   |               |
| NM_000358    | TGFBI    | 119  | 217  | 6.16743550251   |               |
| NM_000358    | TGFBI    | 1452 | 1540 | 6.71492329781   |               |
| NM_001012333 | MDK      | 666  | 750  | 6.23306260435   |               |
| NM_001012333 | MDK      | 254  | 317  | 5.42587470156   |               |
| NM_001012333 | MDK      | 398  | 461  | 6.23323635467   |               |
| NM_182973    | TMPRSS9  | 2106 | 2127 | 10.6434789879   |               |
| NM_006215    | SERPINA4 |      | 1185 | 1229            | 6.5230367066  |
| NM_006215    | SERPINA4 |      | 658  | 727             | 8.26401990094 |
| NM_001164619 | GPC3     | 677  | 753  | 2.90509157874   |               |
| NM_001164619 | GPC3     | 117  | 190  | 2.70345771757   |               |
| NM_001164619 | GPC3     | 314  | 367  | 2.55145462413   |               |
| NM_001164619 | GPC3     | 1271 | 1364 | 2.96649212341   |               |
| NM_001164619 | GPC3     | 2036 | 2106 | -0.618477108369 |               |
| NM_001164619 | GPC3     | 1741 | 1792 | 0.703457717572  |               |
| NM_001164619 | GPC3     | 1031 | 1084 | 2.46899246394   |               |
| NM_001164619 | GPC3     | 1370 | 1415 | 1.38152962268   |               |
| NM_001164619 | GPC3     | 369  | 393  | 0.297390413301  |               |
| NM_001164619 | GPC3     | 477  | 534  | 2.84096124132   |               |
| NM_001164619 | GPC3     | 236  | 305  | 1.18871079442   |               |
| NM_001164619 | GPC3     | 1430 | 1706 | 5.45834521974   |               |
| NM_001164619 | GPC3     | 537  | 676  | 3.90509157874   |               |
| NM_001164619 | GPC3     | 755  | 1012 | 5.42592374204   |               |
| NM_001164619 | GPC3     | 1097 | 1188 | 2.55145462413   |               |
| NM_001080495 | TNRC18   | 6806 | 6860 | 8.08399916227   |               |
| NM_145312    | ZNF485   | 1866 | 1909 | 12.820302076    |               |
| NM_006212    | PFKFB2   | 218  | 237  | 10.2712724755   |               |
| NM_145185    | MAP2K7   | 35   | 60   | 4.93496657235   |               |
| NM_145185    | MAP2K7   | 1932 | 1957 | 4.93496657235   |               |
| NM_006218    | PIK3CA   | 1577 | 1599 | 7.48560209101   |               |
| NM_031311    | CPVL     | 508  | 572  | 6.00078250224   |               |
| NM_031311    | CPVL     | 1057 | 1108 | 6.73774809641   |               |
| NM_031311    | CPVL     | 454  | 505  | 6.00078250223   |               |
| NM_031311    | CPVL     | 622  | 652  | 5.4158200013    |               |
| NM_031311    | CPVL     | 943  | 989  | 6.63821241531   |               |
| NM_031311    | CPVL     | 295  | 332  | 4.74671829141   |               |
| NM_031311    | CPVL     | 1461 | 1511 | 3.83085076974   |               |
| NM_031311    | CPVL     | 112  | 142  | 3.82683990062   |               |
| NM_031311    | CPVL     | 1372 | 1434 | 5.63419482268   |               |
| NM_031311    | CPVL     | 787  | 845  | 4.4158197656    |               |
| NM_031311    | CPVL     | 1251 | 1359 | 6.73774809641   |               |
| NM_004522    | KIF5C    | 4301 | 4321 | 11.4974639643   |               |
| NM_014616    | ATP11B   | 1428 | 1465 | 7.59856980848   |               |
| NM_014613    | FAF2     | 757  | 801  | 7.94622705966   |               |
| NM_014613    | FAF2     | 170  | 220  | 7.27712535711   |               |
| NM_052899    | GPRIN1   | 56   | 87   | 13.8158014939   |               |
| NM_005765    | ATP6AP2  | 810  | 845  | 6.39805413089   |               |
| NM_005765    | ATP6AP2  | 389  | 440  | 7.63584301662   |               |
| NM_005765    | ATP6AP2  | 924  | 965  | 7.3978803808    |               |

|              |          |      |      |                  |               |
|--------------|----------|------|------|------------------|---------------|
| NM_005765    | ATP6AP2  | 636  | 669  | 6.3978803808     |               |
| NM_005765    | ATP6AP2  | 722  | 792  | 8.39804740006    |               |
| NM_005765    | ATP6AP2  | 1034 | 1090 | 6.97899903166    |               |
| NM_005765    | ATP6AP2  | 301  | 342  | 7.39403653094    |               |
| NM_005762    | TRIM28   | 2610 | 2683 | 7.30606472197    |               |
| NM_005762    | TRIM28   | 782  | 827  | 6.93947704242    |               |
| NM_005762    | TRIM28   | 2378 | 2485 | 6.72110222125    |               |
| NM_005768    | LPCAT3   | 1068 | 1093 | 5.54249228621    |               |
| NM_005768    | LPCAT3   | 116  | 178  | 7.62663148804    |               |
| NM_033643    | RPL36    | 98   | 134  | 3.31640030158    |               |
| NM_138570    | SLC38A10 |      | 1237 | 1284             | 8.89691103061 |
| NM_138570    | SLC38A10 |      | 895  | 936              | 9.54898796289 |
| NM_138570    | SLC38A10 |      | 663  | 710              | 8.00541713509 |
| NM_138570    | SLC38A10 |      | 1751 | 1823             | 8.67451884519 |
| NM_001077261 | NCOR2    | 223  | 263  | 7.10827339474    |               |
| NM_005782    | THOC4    | 363  | 425  | 3.97880186686    |               |
| NM_015701    | ERLEC1   | 1416 | 1464 | 4.0979311451     |               |
| NM_001733    | C1R      | 2038 | 2077 | 11.5617681323    |               |
| NM_001733    | C1R      | 2120 | 2174 | 11.0569272408    |               |
| NM_001733    | C1R      | 1152 | 1223 | 13.2308698424    |               |
| NM_144772    | APOA1BP  | 558  | 591  | 8.0197986314     |               |
| NM_000065    | C6       | 738  | 765  | 11.74250024      |               |
| NM_000065    | C6       | 1670 | 1714 | 14.5538727622    |               |
| NM_000065    | C6       | 2317 | 2356 | 11.74250024      |               |
| NM_000064    | C3       | 4    | 73   | 4.16967410352    |               |
| NM_000064    | C3       | 3881 | 3982 | 4.35253816067    |               |
| NM_000064    | C3       | 3982 | 4052 | 2.76757565995    |               |
| NM_000064    | C3       | 3234 | 3267 | 0.545183238605   |               |
| NM_000064    | C3       | 725  | 788  | 3.41965235653    |               |
| NM_000064    | C3       | 794  | 820  | 0.545009488293   |               |
| NM_000064    | C3       | 81   | 125  | -0.0399530124281 |               |
| NM_000064    | C3       | 451  | 710  | 5.76757565995    |               |
| NM_000064    | C3       | 820  | 921  | 3.66066045603    |               |
| NM_000064    | C3       | 1154 | 1323 | 4.96022073789    |               |
| NM_000064    | C3       | 4052 | 4149 | 2.66066045603    |               |
| NM_000064    | C3       | 348  | 448  | 3.48378269395    |               |
| NM_000064    | C3       | 4344 | 4900 | 6.93176429184    |               |
| NM_000064    | C3       | 142  | 323  | 5.56013358008    |               |
| NM_000064    | C3       | 929  | 1130 | 4.96022073789    |               |
| NM_000064    | C3       | 1817 | 3218 | 8.31777274251    |               |
| NM_000064    | C3       | 3268 | 3557 | 5.51480958957    |               |
| NM_000064    | C3       | 4909 | 5044 | 4.98258855092    |               |
| NM_000064    | C3       | 3565 | 3866 | 5.76757565995    |               |
| NM_000064    | C3       | 1323 | 1817 | 6.69493035812    |               |
| NM_000064    | C3       | 4162 | 4327 | 4.41965235653    |               |
| NM_024105    | ALG12    | 934  | 972  | 6.29572756765    |               |
| NM_000607    | ORM1     | 714  | 767  | 4.65162838832    |               |
| NM_000607    | ORM1     | 358  | 406  | 3.55209271455    |               |
| NM_000607    | ORM1     | 408  | 444  | 2.24556108405    |               |
| NM_000607    | ORM1     | 318  | 358  | 4.0666658876     |               |



|              |          |      |      |                   |
|--------------|----------|------|------|-------------------|
| NM_000607    | ORM1     | 455  | 702  | 7.53915365906     |
| NM_000607    | ORM1     | 768  | 832  | 3.32970029343     |
| NM_000606    | C8G      | 457  | 513  | 11.3485296341     |
| NM_000608    | ORM2     | 635  | 707  | 5.04677271149     |
| NM_000608    | ORM2     | 468  | 634  | 6.89476961805     |
| NM_000608    | ORM2     | 441  | 468  | 2.64070540722     |
| NM_000608    | ORM2     | 323  | 409  | 4.84032183403     |
| NM_000608    | ORM2     | 719  | 837  | 5.30980711733     |
| NM_017645    | HAUS6    | 799  | 817  | 6.41698072028     |
| NM_182895    | SCARF2   | 1927 | 1966 | 13.7286842711     |
| NM_001042432 | CLN3     | 1328 | 1399 | 10.0409083832     |
| NM_001042432 | CLN3     | 1626 | 1674 | 9.14958800208     |
| NM_001042432 | CLN3     | 1169 | 1239 | 9.55565530635     |
| NM_001042432 | CLN3     | 1524 | 1569 | 9.47151609697     |
| NM_001042432 | CLN3     | 312  | 386  | 9.23372048041     |
| NM_001042432 | CLN3     | 619  | 681  | 10.4036522129     |
| NM_017727    | TMEM214  | 2050 | 2120 | 8.0250338881      |
| NM_145648    | SLC15A4  | 699  | 768  | 9.29487344105     |
| NM_145648    | SLC15A4  | 985  | 1053 | 9.70589334771     |
| NM_145648    | SLC15A4  | 1537 | 1581 | 7.70589334771     |
| NM_006031    | PCNT     | 7893 | 7961 | 8.47484635561     |
| NM_017723    | C9orf167 |      | 881  | 950 11.5054598476 |
| NM_153182    | MINA     | 3733 | 3753 | 6.27259379244     |
| NM_002355    | M6PR     | 982  | 1026 | 7.36981517039     |
| NM_002355    | M6PR     | 401  | 457  | 5.96374810204     |
| NM_002355    | M6PR     | 662  | 705  | 6.63267606183     |
| NM_002355    | M6PR     | 561  | 592  | 5.96374810204     |
| NM_002355    | M6PR     | 734  | 765  | 6.63284308109     |
| NM_002354    | EPCAM    | 819  | 886  | 6.01617906695     |
| NM_002354    | EPCAM    | 607  | 670  | 5.34875440604     |
| NM_002354    | EPCAM    | 1237 | 1298 | 5.43121656623     |
| NM_002354    | EPCAM    | 417  | 467  | 3.84624733445     |
| NM_002354    | EPCAM    | 1340 | 1401 | 4.06864648684     |
| NM_002354    | EPCAM    | 178  | 247  | 2.84624733445     |
| NM_002354    | EPCAM    | 550  | 592  | 3.26129156478     |
| NM_002354    | EPCAM    | 934  | 1017 | 6.01617906695     |
| NM_002354    | EPCAM    | 700  | 815  | 6.30568568414     |
| NM_002354    | EPCAM    | 1032 | 1218 | 6.84625406551     |
| NM_002356    | MARCKS   | 197  | 258  | 9.76434603321     |
| NM_014287    | NOM01    | 3549 | 3584 | 3.76302619238     |
| NM_014287    | NOM01    | 1369 | 1429 | 5.7630264283      |
| NM_014287    | NOM01    | 3378 | 3432 | 5.34798892902     |
| NM_014287    | NOM01    | 1734 | 1809 | 5.57038135036     |
| NM_014287    | NOM01    | 708  | 748  | 6.22245804694     |
| NM_014287    | NOM01    | 1666 | 1734 | 4.34798892902     |
| NM_014287    | NOM01    | 2625 | 2687 | 4.75900882813     |
| NM_014287    | NOM01    | 3250 | 3280 | 4.34798892902     |
| NM_014287    | NOM01    | 2012 | 2048 | 4.76302619238     |
| NM_014287    | NOM01    | 2301 | 2389 | 5.08495452319     |
| NM_014287    | NOM01    | 3870 | 3931 | 4.34798892902     |

|              |         |      |      |               |
|--------------|---------|------|------|---------------|
| NM_014287    | NOM01   | 432  | 463  | 4.34798892147 |
| NM_014287    | NOM01   | 2181 | 2224 | 2.67888721892 |
| NM_014287    | NOM01   | 779  | 838  | 4.76302619238 |
| NM_014287    | NOM01   | 959  | 1019 | 5.08494779214 |
| NM_014287    | NOM01   | 2122 | 2180 | 5.93295142974 |
| NM_014287    | NOM01   | 3498 | 3542 | 3.76285267798 |
| NM_014287    | NOM01   | 4021 | 4074 | 3.76302642808 |
| NM_014287    | NOM01   | 150  | 315  | 7.46346614644 |
| NM_014287    | NOM01   | 2990 | 3117 | 7.34798892902 |
| NM_014287    | NOM01   | 1879 | 1959 | 5.7630264283  |
| NM_014287    | NOM01   | 2491 | 2549 | 3.76301969725 |
| NM_014287    | NOM01   | 315  | 424  | 6.08495452319 |
| NM_014287    | NOM01   | 1459 | 1630 | 6.66991702391 |
| NM_014287    | NOM01   | 2884 | 2945 | 4.34397132885 |
| NM_014287    | NOM01   | 876  | 948  | 5.08495428727 |
| NM_014287    | NOM01   | 2750 | 2876 | 5.93295142974 |
| NM_014287    | NOM01   | 1818 | 1871 | 4.34798219797 |
| NM_007032    | TRIOBP  | 77   | 109  | 7.56816162775 |
| NM_001032999 | CBFA2T2 | 120  | 139  | 5.12629988038 |
| NM_014860    | SUPT7L  | 1523 | 1543 | 6.53588261149 |
| NM_014866    | SEC16A  | 6544 | 6568 | 8.83325248837 |
| NM_001112718 | LIMCH1  | 26   | 50   | 12.9462903257 |
| NM_173210    | TGIF1   | 126  | 145  | 4.69682058367 |
| NM_012426    | SF3B3   | 2209 | 2287 | 6.24372463987 |
| NM_012423    | RPL13A  | 685  | 742  | 1.62688409083 |
| NM_012423    | RPL13A  | 77   | 129  | 1.12204319932 |
| NM_012423    | RPL13A  | 418  | 465  | 2.04192159011 |
| NM_012423    | RPL13A  | 607  | 680  | 1.93340899049 |
| NM_001073    | UGT2B11 | 1223 | 1252 | 9.64302509615 |
| NM_001073    | UGT2B11 | 1049 | 1081 | 9.64686894601 |
| NM_001073    | UGT2B11 | 876  | 940  | 9.64704246041 |
| NM_001073    | UGT2B11 | 1007 | 1031 | 8.06190644529 |
| NM_004776    | B4GALT5 | 1658 | 1732 | 6.97019531528 |
| NM_001075    | UGT2B10 | 1238 | 1265 | 4.40684864238 |
| NM_001075    | UGT2B10 | 891  | 955  | 6.07595034494 |
| NM_001074    | UGT2B7  | 769  | 837  | 8.41860123032 |
| NM_001074    | UGT2B7  | 681  | 713  | 8.33446202093 |
| NM_001074    | UGT2B7  | 1043 | 1068 | 6.83363849368 |
| NM_001074    | UGT2B7  | 1414 | 1449 | 5.83363199854 |
| NM_001074    | UGT2B7  | 1514 | 1566 | 8.6409869206  |
| NM_001074    | UGT2B7  | 913  | 977  | 7.41860122277 |
| NM_001135820 | TMEM2   | 2757 | 2798 | 7.83080849975 |
| NM_001135820 | TMEM2   | 1545 | 1584 | 5.95232178189 |
| NM_001135820 | TMEM2   | 3909 | 3952 | 5.95232178189 |
| NM_001135820 | TMEM2   | 3637 | 3664 | 5.87220017267 |
| NM_001135820 | TMEM2   | 4373 | 4400 | 5.36735928116 |
| NM_001135820 | TMEM2   | 2299 | 2365 | 5.95633938184 |
| NM_001135820 | TMEM2   | 1422 | 1479 | 6.37137687379 |
| NM_001135820 | TMEM2   | 1759 | 1851 | 8.27826747695 |
| NM_001135820 | TMEM2   | 2005 | 2047 | 4.28723767195 |

|              |          |      |      |                 |                |
|--------------|----------|------|------|-----------------|----------------|
| NM_001135820 | TMEM2    | 1253 | 1288 | 4.36735928116   |                |
| NM_001135820 | TMEM2    | 1187 | 1252 | 7.69330497622   |                |
| NM_001135820 | TMEM2    | 3093 | 3145 | 6.69330474031   |                |
| NM_001135820 | TMEM2    | 3231 | 3260 | 4.36735928116   |                |
| NM_000477    | ALB      | 2038 | 2082 | -1.56788007169  |                |
| NM_000477    | ALB      | 1556 | 1681 | 2.5025092562    |                |
| NM_000477    | ALB      | 1359 | 1551 | 3.24974318582   |                |
| NM_000477    | ALB      | 1683 | 1913 | 3.32936035389   |                |
| NM_000477    | ALB      | 209  | 347  | 2.19765467467   |                |
| NM_000477    | ALB      | 33   | 84   | -0.719883165133 |                |
| NM_000477    | ALB      | 1969 | 2018 | -0.719883165133 |                |
| NM_000477    | ALB      | 96   | 202  | 1.6647806851    |                |
| NM_000477    | ALB      | 353  | 626  | 3.65708629331   |                |
| NM_000477    | ALB      | 637  | 1357 | 5.33901052392   |                |
| NM_004607    | TBCA     | 208  | 260  | 4.60008134377   |                |
| NM_004597    | SNRPD2   | 350  | 400  | 6.45739425055   |                |
| NM_001152    | SLC25A5  | 704  | 788  | 4.59870808947   |                |
| NM_016256    | NAGPA    | 1245 | 1297 | 8.96392155494   |                |
| NM_032017    | STK40    | 35   | 66   | 5.16262647117   |                |
| NM_000291    | PGK1     | 414  | 483  | 2.32053900915   |                |
| NM_000295    | SERPINA1 |      | 184  | 218             | 0.30559864568  |
| NM_000295    | SERPINA1 |      | 1467 | 1618            | 2.76520401464  |
| NM_000295    | SERPINA1 |      | 508  | 1427            | 8.3610548315   |
| NM_000295    | SERPINA1 |      | 441  | 497             | 0.221633186614 |
| NM_000295    | SERPINA1 |      | 226  | 437             | 5.41429685278  |
| NM_002032    | FTH1     | 138  | 199  | 1.46443091093   |                |
| NM_002032    | FTH1     | 710  | 753  | -2.07913991709  |                |
| NM_002032    | FTH1     | 350  | 620  | 2.86298028742   |                |
| NM_001679    | ATP1B3   | 950  | 990  | 8.15650564281   |                |
| NM_001679    | ATP1B3   | 890  | 938  | 5.9825630412    |                |
| NM_001679    | ATP1B3   | 1158 | 1244 | 7.57154290618   |                |
| NM_001679    | ATP1B3   | 695  | 763  | 7.30850873625   |                |
| NM_203472    | SELS     | 74   | 102  | 2.81115473528   |                |
| NM_203472    | SELS     | 1190 | 1236 | 5.8113284856    |                |
| NM_032121    | MAGT1    | 714  | 792  | 9.35276753973   |                |
| NM_032121    | MAGT1    | 1054 | 1114 | 8.8502671992    |                |
| NM_032121    | MAGT1    | 508  | 550  | 6.26530446256   |                |
| NM_032121    | MAGT1    | 212  | 265  | 7.58321519319   |                |
| NM_032121    | MAGT1    | 372  | 401  | 7.26513094816   |                |
| NM_032121    | MAGT1    | 1009 | 1048 | 7.58723255745   |                |
| NM_032121    | MAGT1    | 305  | 359  | 8.26530446256   |                |
| NM_032121    | MAGT1    | 803  | 869  | 7.26530469826   |                |
| NM_004284    | CHD1L    | 327  | 347  | 3.62478339945   |                |
| NM_006197    | PCM1     | 4830 | 4868 | 3.73177952857   |                |
| NM_006196    | PCBP1    | 291  | 360  | 5.43239957367   |                |
| NM_207342    | STEAP1B  | 826  | 883  | 9.11571897323   |                |
| NM_005567    | LGALS3BP |      | 1915 | 1981            | 7.80129177189  |
| NM_005567    | LGALS3BP |      | 2206 | 2251            | 3.19359060645  |
| NM_005567    | LGALS3BP |      | 1768 | 1832            | 7.44765481727  |
| NM_005567    | LGALS3BP |      | 179  | 270             | 6.73716143447  |

|           |          |       |       |               |
|-----------|----------|-------|-------|---------------|
| NM_005567 | LGALS3BP | 1991  | 2071  | 7.08508473789 |
| NM_005567 | LGALS3BP | 302   | 388   | 8.08508473789 |
| NM_005567 | LGALS3BP | 458   | 546   | 7.18462041144 |
| NM_005567 | LGALS3BP | 929   | 978   | 5.27772308478 |
| NM_005567 | LGALS3BP | 750   | 799   | 7.52565732928 |
| NM_005567 | LGALS3BP | 1127  | 1241  | 7.92158600561 |
| NM_005567 | LGALS3BP | 986   | 1032  | 4.27772957991 |
| NM_005567 | LGALS3BP | 831   | 883   | 6.44765458136 |
| NM_005567 | LGALS3BP | 1391  | 1434  | 5.77855310717 |
| NM_005567 | LGALS3BP | 699   | 748   | 5.59965790317 |
| NM_005567 | LGALS3BP | 1629  | 1694  | 6.73716143447 |
| NM_005567 | LGALS3BP | 58    | 126   | 4.86269231655 |
| NM_005567 | LGALS3BP | 1475  | 1544  | 5.86269231655 |
| NM_005567 | LGALS3BP | 584   | 699   | 7.59965791072 |
| NM_005567 | LGALS3BP | 1245  | 1384  | 7.52565732928 |
| NM_005564 | LCN2     | 537   | 691   | 15.830732568  |
| NM_005564 | LCN2     | 440   | 471   | 11.5787874543 |
| NM_005564 | LCN2     | 292   | 392   | 15.085305395  |
| NM_005564 | LCN2     | 121   | 289   | 15.2072959194 |
| NM_005561 | LAMP1    | 1202  | 1243  | 8.08070572529 |
| NM_005561 | LAMP1    | 1061  | 1145  | 7.66566822601 |
| NM_005561 | LAMP1    | 1965  | 2008  | 7.56613255246 |
| NM_005561 | LAMP1    | 1472  | 1518  | 6.3437401309  |
| NM_005561 | LAMP1    | 509   | 580   | 7.56613255246 |
| NM_005561 | LAMP1    | 1553  | 1634  | 6.34374012358 |
| NM_005561 | LAMP1    | 759   | 812   | 7.66566822601 |
| NM_005561 | LAMP1    | 923   | 1061  | 9.61675862553 |
| NM_005561 | LAMP1    | 404   | 508   | 7.7587776304  |
| NM_005561 | LAMP1    | 1342  | 1465  | 8.66566822601 |
| NM_005561 | LAMP1    | 637   | 732   | 9.18504238511 |
| NM_005561 | LAMP1    | 1768  | 1913  | 7.08070572529 |
| NM_005561 | LAMP1    | 2364  | 2505  | 8.34374013112 |
| NM_005561 | LAMP1    | 2079  | 2142  | 5.75476003023 |
| NM_005560 | LAMA5    | 8814  | 8864  | 8.69151975005 |
| NM_005560 | LAMA5    | 6880  | 6936  | 9.53969039937 |
| NM_005560 | LAMA5    | 4728  | 4757  | 8.28562619609 |
| NM_005560 | LAMA5    | 8444  | 8479  | 7.87058869682 |
| NM_005560 | LAMA5    | 8753  | 8811  | 8.36574780531 |
| NM_005560 | LAMA5    | 5664  | 5734  | 9.36976540548 |
| NM_005560 | LAMA5    | 9229  | 9301  | 6.36959165516 |
| NM_005560 | LAMA5    | 3060  | 3132  | 6.36959165516 |
| NM_005560 | LAMA5    | 7925  | 7981  | 7.95472789865 |
| NM_005560 | LAMA5    | 10277 | 10314 | 8.69169326445 |
| NM_005560 | LAMA5    | 1693  | 1738  | 7.36959165516 |
| NM_005560 | LAMA5    | 6062  | 6113  | 7.28562619609 |
| NM_005560 | LAMA5    | 3330  | 3369  | 8.28562619609 |
| NM_005560 | LAMA5    | 3841  | 3889  | 9.17694657722 |
| NM_005560 | LAMA5    | 2472  | 2546  | 7.36574780531 |
| NM_005560 | LAMA5    | 4555  | 4609  | 6.36574780531 |
| NM_005560 | LAMA5    | 2245  | 2291  | 7.87058869682 |

|           |       |       |       |               |
|-----------|-------|-------|-------|---------------|
| NM_005560 | LAMA5 | 545   | 577   | 7.87058869682 |
| NM_005560 | LAMA5 | 10514 | 10575 | 7.95071030603 |
| NM_002291 | LAMB1 | 1924  | 1972  | 5.48019078395 |
| NM_002291 | LAMB1 | 3654  | 3744  | 5.25779837017 |
| NM_002291 | LAMB1 | 3948  | 4002  | 3.67282913839 |
| NM_002291 | LAMB1 | 4362  | 4441  | 6.13226748808 |
| NM_002291 | LAMB1 | 1624  | 1659  | 5.67283563353 |
| NM_002291 | LAMB1 | 1835  | 1887  | 6.37327558759 |
| NM_002291 | LAMB1 | 3890  | 3926  | 4.67266211913 |
| NM_002291 | LAMB1 | 3503  | 3577  | 6.13226748808 |
| NM_002291 | LAMB1 | 1044  | 1083  | 3.58869666006 |
| NM_002291 | LAMB1 | 5170  | 5217  | 6.13209373776 |
| NM_002291 | LAMB1 | 1509  | 1561  | 5.84276087089 |
| NM_002291 | LAMB1 | 1323  | 1374  | 2.66881826927 |
| NM_002291 | LAMB1 | 3384  | 3436  | 5.25779836262 |
| NM_002291 | LAMB1 | 900   | 933   | 4.66881826927 |
| NM_002291 | LAMB1 | 952   | 979   | 4.58869666006 |
| NM_002291 | LAMB1 | 1405  | 1435  | 4.66881826927 |
| NM_002291 | LAMB1 | 1248  | 1307  | 4.99476396411 |
| NM_002291 | LAMB1 | 5112  | 5148  | 3.58869666006 |
| NM_002291 | LAMB1 | 5383  | 5420  | 3.67282913839 |
| NM_002291 | LAMB1 | 5024  | 5063  | 2.66881826927 |
| NM_002291 | LAMB1 | 2994  | 3036  | 3.58869666006 |
| NM_002291 | LAMB1 | 2746  | 2776  | 4.25779163911 |
| NM_002291 | LAMB1 | 3151  | 3226  | 6.25779837017 |
| NM_002291 | LAMB1 | 2920  | 2993  | 5.25779837017 |
| NM_002291 | LAMB1 | 747   | 862   | 6.84276087089 |
| NM_002291 | LAMB1 | 2403  | 2495  | 5.6728358619  |
| NM_002291 | LAMB1 | 4507  | 4642  | 5.84276087089 |
| NM_002292 | LAMB2 | 2378  | 2440  | 7.03248364228 |
| NM_002293 | LAMC1 | 1576  | 1612  | 4.58656680976 |
| NM_002293 | LAMC1 | 4692  | 4722  | 4.90832116188 |
| NM_002293 | LAMC1 | 433   | 509   | 6.04599843595 |
| NM_002293 | LAMC1 | 337   | 394   | 4.5865668173  |
| NM_002293 | LAMC1 | 1288  | 1372  | 5.9084949122  |
| NM_002293 | LAMC1 | 3609  | 3650  | 5.17152931803 |
| NM_002293 | LAMC1 | 1080  | 1106  | 4.90849490465 |
| NM_002293 | LAMC1 | 4031  | 4120  | 6.17152931803 |
| NM_002293 | LAMC1 | 1392  | 1425  | 4.58254921714 |
| NM_002293 | LAMC1 | 3531  | 3593  | 3.58656658139 |
| NM_002293 | LAMC1 | 1535  | 1564  | 4.50242760792 |
| NM_002293 | LAMC1 | 3138  | 3166  | 3.58639306699 |
| NM_002293 | LAMC1 | 5004  | 5036  | 4.82435570281 |
| NM_002293 | LAMC1 | 2631  | 2762  | 7.28700653545 |
| NM_002293 | LAMC1 | 4833  | 4875  | 5.58639306699 |
| NM_002293 | LAMC1 | 1431  | 1479  | 4.58639306699 |
| NM_002293 | LAMC1 | 2557  | 2631  | 6.04599843572 |
| NM_002293 | LAMC1 | 3424  | 3466  | 5.58656680976 |
| NM_002293 | LAMC1 | 3312  | 3342  | 4.90848818114 |
| NM_002293 | LAMC1 | 1119  | 1159  | 3.50242760792 |

|              |          |      |      |               |                |
|--------------|----------|------|------|---------------|----------------|
| NM_002293    | LAMC1    | 4358 | 4402 | 6.17152931803 |                |
| NM_002293    | LAMC1    | 2919 | 3080 | 7.11012877337 |                |
| NM_002293    | LAMC1    | 2048 | 2099 | 2.50242760792 |                |
| NM_002293    | LAMC1    | 1890 | 1938 | 2.58656658139 |                |
| NM_002293    | LAMC1    | 3171 | 3306 | 6.67402965856 |                |
| NM_002293    | LAMC1    | 1160 | 1212 | 4.58656008626 |                |
| NM_002293    | LAMC1    | 1809 | 1884 | 4.17152931802 |                |
| NM_002293    | LAMC1    | 971  | 1040 | 4.17152908211 |                |
| NM_002293    | LAMC1    | 2446 | 2535 | 4.58656008626 |                |
| NM_002293    | LAMC1    | 4165 | 4263 | 5.39392173937 |                |
| NM_002293    | LAMC1    | 2245 | 2328 | 4.90848818114 |                |
| NM_002293    | LAMC1    | 2819 | 2881 | 5.39391500831 |                |
| NM_002296    | LBR      | 848  | 871  | 7.57281032093 |                |
| NM_002296    | LBR      | 771  | 802  | 7.65293193014 |                |
| NM_002296    | LBR      | 991  | 1060 | 9.46430445215 |                |
| NM_002296    | LBR      | 1932 | 1999 | 9.82687453176 |                |
| NM_002296    | LBR      | 1090 | 1139 | 10.4643044524 |                |
| NM_002296    | LBR      | 1629 | 1691 | 8.23789443086 |                |
| NM_002296    | LBR      | 1175 | 1267 | 10.7444123716 |                |
| NM_002296    | LBR      | 1443 | 1570 | 10.3573892485 |                |
| NM_005749    | TOB1     | 1047 | 1152 | 7.47493938621 |                |
| NM_000101    | CYBA     | 426  | 507  | 8.7685657532  |                |
| NM_000101    | CYBA     | 323  | 367  | 8.7685657532  |                |
| NM_000101    | CYBA     | 71   | 141  | 7.6310622219  |                |
| NM_000101    | CYBA     | 650  | 707  | 8.63106222945 |                |
| NM_000101    | CYBA     | 392  | 425  | 6.22499492518 |                |
| NM_000101    | CYBA     | 215  | 314  | 7.63106222945 |                |
| NM_052876    | NACC1    | 3971 | 4004 | 7.31563913205 |                |
| NM_014498    | GOLIM4   | 258  | 334  | 2.406055152   |                |
| NM_014498    | GOLIM4   | 835  | 893  | 4.99101765273 |                |
| NM_022152    | TMBIM1   | 1115 | 1174 | 6.12079501152 |                |
| NM_022152    | TMBIM1   | 795  | 859  | 5.12080174235 |                |
| NM_022157    | RRAGC    | 37   | 63   | 6.91882689958 |                |
| NM_025069    | ZNF703   | 26   | 59   | 11.3027849159 |                |
| NM_016134    | PGCP     | 1064 | 1101 | 5.75887142323 |                |
| NM_016134    | PGCP     | 421  | 464  | 4.17791979163 |                |
| NM_016134    | PGCP     | 1161 | 1238 | 6.4958370174  |                |
| NM_013943    | CLIC4    | 437  | 471  | 3.63111352078 |                |
| NM_170776    | GPR97    | 456  | 479  | 10.7003412201 |                |
| NM_001177643 | DAG1     | 1008 | 1043 | 7.46572901951 |                |
| NM_001177643 | DAG1     | 2863 | 2897 | 9.46572901951 |                |
| NM_005348    | HSP90AA1 |      | 1421 | 1508          | 1.40984854576  |
| NM_005348    | HSP90AA1 |      | 1212 | 1252          | 1.82488604504  |
| NM_005348    | HSP90AA1 |      | 852  | 927           | 1.82471902577  |
| NM_005348    | HSP90AA1 |      | 439  | 501           | 2.40985504089  |
| NM_005348    | HSP90AA1 |      | 281  | 337           | 0.820875175919 |
| NM_005348    | HSP90AA1 |      | 2241 | 2290          | 0.820875175919 |
| NM_005348    | HSP90AA1 |      | 939  | 1092          | 3.63224769815  |
| NM_005348    | HSP90AA1 |      | 1874 | 1940          | 1.40583767664  |
| NM_001207014 | SERPINH1 |      | 1363 | 1396          | 6.80624277622  |

|              |          |      |      |      |               |
|--------------|----------|------|------|------|---------------|
| NM_001207014 | SERPINH1 |      | 1153 | 1196 | 6.81025364534 |
| NM_001207014 | SERPINH1 |      | 1200 | 1232 | 6.39521614606 |
| NM_001207014 | SERPINH1 |      | 883  | 936  | 6.31108366773 |
| NM_001207014 | SERPINH1 |      | 711  | 783  | 7.98018537784 |
| NM_000042    | APOH     | 251  | 311  |      | 4.85014335201 |
| NM_000042    | APOH     | 1021 | 1093 |      | 4.40268437504 |
| NM_000042    | APOH     | 743  | 801  |      | 4.40268437504 |
| NM_000042    | APOH     | 619  | 663  |      | 3.75060767091 |
| NM_000042    | APOH     | 685  | 724  |      | 3.52820852607 |
| NM_000042    | APOH     | 957  | 1003 |      | 3.75060094741 |
| NM_000042    | APOH     | 200  | 244  |      | 2.93923515623 |
| NM_000042    | APOH     | 456  | 493  |      | 2.9432527564  |
| NM_000042    | APOH     | 340  | 423  |      | 5.11317775784 |
| NM_000041    | APOE     | 750  | 875  |      | 4.16644333306 |
| NM_000041    | APOE     | 572  | 620  |      | 3.36997672715 |
| NM_000041    | APOE     | 702  | 745  |      | 2.44397730859 |
| NM_000041    | APOE     | 920  | 1077 |      | 4.25133223065 |
| NM_000041    | APOE     | 20   | 114  |      | 3.64561116976 |
| NM_000041    | APOE     | 186  | 506  |      | 6.08783349837 |
| NM_000040    | APOC3    | 277  | 318  |      | 4.49003673907 |
| NM_000040    | APOC3    | 220  | 276  |      | 3.98921321181 |
| NM_000598    | IGFBP3   | 57   | 116  |      | 5.40211818469 |
| NM_000598    | IGFBP3   | 185  | 206  |      | 5.40612905381 |
| NM_000598    | IGFBP3   | 154  | 185  |      | 5.40211818469 |
| NM_000598    | IGFBP3   | 527  | 559  |      | 5.32199657548 |
| NM_001198569 | ATP6V0C  | 402  | 439  |      | 3.1309732536  |
| NM_001198569 | ATP6V0C  | 455  | 512  |      | 5.94234553991 |
| NM_001198569 | ATP6V0C  | 753  | 794  |      | 4.05085164439 |
| NM_016395    | PTPLAD1  | 868  | 911  |      | 5.88951138274 |
| NM_016395    | PTPLAD1  | 205  | 252  |      | 5.66711895407 |
| NM_016395    | PTPLAD1  | 778  | 817  |      | 6.54158807954 |
| NM_016395    | PTPLAD1  | 919  | 1001 |      | 7.16961930215 |
| NM_016395    | PTPLAD1  | 1056 | 1089 |      | 3.07813886073 |
| NM_016395    | PTPLAD1  | 696  | 751  |      | 5.08214972985 |
| NM_016395    | PTPLAD1  | 620  | 686  |      | 6.66711896162 |
| NM_178812    | MTDH     | 1899 | 1941 |      | 7.99557464361 |
| NM_178812    | MTDH     | 1267 | 1354 |      | 8.1654996526  |
| NM_178812    | MTDH     | 941  | 997  |      | 10.1248576681 |
| NM_178812    | MTDH     | 872  | 918  |      | 7.80292957322 |
| NM_178812    | MTDH     | 1216 | 1261 |      | 7.91143544178 |
| NM_178812    | MTDH     | 704  | 767  |      | 9.24350216461 |
| NM_178812    | MTDH     | 626  | 697  |      | 9.1654996526  |
| NM_178812    | MTDH     | 1452 | 1566 |      | 9.51913660722 |
| NM_178819    | AGPAT6   | 2032 | 2066 |      | 6.25154775378 |
| NM_003246    | THBS1    | 1841 | 1909 |      | 9.21398956457 |
| NM_003246    | THBS1    | 3781 | 3882 |      | 9.84202078718 |
| NM_003246    | THBS1    | 2435 | 2512 |      | 9.92448294737 |
| NM_003246    | THBS1    | 948  | 1042 |      | 10.4549976641 |
| NM_003246    | THBS1    | 2213 | 2316 |      | 10.278119902  |
| NM_003246    | THBS1    | 2696 | 2776 |      | 10.6614485415 |

|              |           |      |      |               |               |
|--------------|-----------|------|------|---------------|---------------|
| NM_003246    | THBS1     | 1134 | 1233 | 11.0399601648 |               |
| NM_003246    | THBS1     | 1992 | 2056 | 9.75455794593 |               |
| NM_003246    | THBS1     | 2328 | 2435 | 10.6125389411 |               |
| NM_003246    | THBS1     | 2985 | 3038 | 8.75455794593 |               |
| NM_003246    | THBS1     | 242  | 342  | 10.9640113116 |               |
| NM_003246    | THBS1     | 797  | 845  | 7.33952044665 |               |
| NM_003246    | THBS1     | 2516 | 2549 | 7.25538123727 |               |
| NM_003246    | THBS1     | 1045 | 1120 | 8.92448294737 |               |
| NM_003246    | THBS1     | 3462 | 3514 | 7.75438419561 |               |
| NM_003246    | THBS1     | 4312 | 4365 | 7.75455121488 |               |
| NM_003246    | THBS1     | 179  | 231  | 8.07648604081 |               |
| NM_003246    | THBS1     | 2549 | 2686 | 10.7545579459 |               |
| NM_003246    | THBS1     | 3712 | 3766 | 7.33550284648 |               |
| NM_003246    | THBS1     | 3526 | 3687 | 10.6125389411 |               |
| NM_003246    | THBS1     | 3335 | 3425 | 9.66144854154 |               |
| NM_003246    | THBS1     | 2099 | 2211 | 10.2139895646 |               |
| NM_003246    | THBS1     | 2821 | 2975 | 11.4824784005 |               |
| NM_003246    | THBS1     | 1257 | 1592 | 12.4960249323 |               |
| NM_003246    | THBS1     | 542  | 730  | 11.3091467976 |               |
| NM_003246    | THBS1     | 350  | 535  | 11.1468753687 |               |
| NM_003246    | THBS1     | 1652 | 1834 | 11.7087542563 |               |
| NM_003246    | THBS1     | 4167 | 4256 | 7.75438419561 |               |
| NM_003246    | THBS1     | 3093 | 3327 | 11.9833766364 |               |
| NM_003247    | THBS2     | 2526 | 2560 | 14.4661043964 |               |
| NM_173791    | PDZD8     | 127  | 184  | 7.24656441951 |               |
| NM_001199744 | SAA2-SAA4 |      | 165  | 185           | 8.63572674194 |
| NM_000628    | IL10RB    | 313  | 336  | 6.78544732194 |               |
| NM_000624    | SERPINA5  |      | 1262 | 1337          | 5.11149466019 |
| NM_000624    | SERPINA5  |      | 1341 | 1385          | 5.34595991383 |
| NM_000624    | SERPINA5  |      | 1054 | 1123          | 6.0684259383  |
| NM_000624    | SERPINA5  |      | 65   | 110           | 3.60899408374 |
| NM_000624    | SERPINA5  |      | 293  | 354           | 2.02403181139 |
| NM_000624    | SERPINA5  |      | 1204 | 1252          | 3.34595991383 |
| NM_000624    | SERPINA5  |      | 494  | 525           | 2.60497671949 |
| NM_000624    | SERPINA5  |      | 1980 | 2024          | 3.26182070444 |
| NM_000624    | SERPINA5  |      | 1018 | 1051          | 2.60497671949 |
| NM_000624    | SERPINA5  |      | 881  | 1007          | 6.45029657364 |
| NM_000624    | SERPINA5  |      | 634  | 849           | 6.8569218331  |
| NM_006500    | MCAM      | 1712 | 1758 | 8.11554573864 |               |
| NM_020440    | PTGFRN    | 1927 | 1975 | 11.1404320685 |               |
| NM_002997    | SDC1      | 72   | 101  | 4.79586374603 |               |
| NM_002997    | SDC1      | 390  | 436  | 7.12180944108 |               |
| NM_002997    | SDC1      | 1551 | 1584 | 6.38082624675 |               |
| NM_002997    | SDC1      | 596  | 636  | 6.384843611   |               |
| NM_002997    | SDC1      | 1395 | 1424 | 5.79987461515 |               |
| NM_002997    | SDC1      | 131  | 193  | 6.79988134598 |               |
| NM_002997    | SDC1      | 907  | 1011 | 6.79988134598 |               |
| NM_002997    | SDC1      | 1091 | 1170 | 7.96980634764 |               |
| NM_002996    | CX3CL1    | 85   | 140  | 7.45291024161 |               |
| NM_002996    | CX3CL1    | 420  | 462  | 5.12713829687 |               |



|              |          |       |       |                    |
|--------------|----------|-------|-------|--------------------|
| NM_002999    | SDC4     | 281   | 302   | 6.70505407352      |
| NM_002999    | SDC4     | 1709  | 1781  | 9.7010432044       |
| NM_002999    | SDC4     | 168   | 277   | 12.0973782274      |
| NM_002999    | SDC4     | 446   | 598   | 11.9904630234      |
| NM_002998    | SDC2     | 836   | 897   | 3.63532919305      |
| NM_002998    | SDC2     | 456   | 569   | 4.33576891119      |
| NM_002998    | SDC2     | 902   | 995   | 4.22029169377      |
| NM_002998    | SDC2     | 587   | 682   | 3.80525419449      |
| NM_002998    | SDC2     | 737   | 822   | 3.63532919283      |
| NM_002998    | SDC2     | 1065  | 1178  | 4.22029169377      |
| NM_024834    | MCMBP    | 177   | 197   | 6.05912140375      |
| NM_001015    | RPS11    | 290   | 322   | 1.91807006168      |
| NM_001015    | RPS11    | 347   | 401   | 2.40349688153      |
| NM_001015    | RPS11    | 409   | 500   | 1.18110446019      |
| NM_001015    | RPS11    | 78    | 128   | -0.403864764034    |
| NM_013375    | ABT1     | 1031  | 1050  | 5.41629554651      |
| NM_024524    | ATP13A3  | 2048  | 2076  | 6.74821080373      |
| NM_024524    | ATP13A3  | 3533  | 3600  | 5.8321762628       |
| NM_024524    | ATP13A3  | 3350  | 3394  | 7.15026050783      |
| NM_024524    | ATP13A3  | 1784  | 1820  | 4.74821080373      |
| NM_024524    | ATP13A3  | 3028  | 3079  | 7.83235001312      |
| NM_024524    | ATP13A3  | 2655  | 2701  | 6.41713876352      |
| NM_024524    | ATP13A3  | 590   | 645   | 8.41731251384      |
| NM_024524    | ATP13A3  | 1835  | 1932  | 7.74821080373      |
| NM_024524    | ATP13A3  | 915   | 979   | 6.41713876352      |
| NM_004496    | FOXA1    | 958   | 983   | 6.39334759516      |
| NM_012232    | PTRF     | 1543  | 1562  | 7.19715314937      |
| NM_014805    | EPM2AIP1 |       | 16    | 36 7.83449514099   |
| NM_014802    | KIAA0528 |       | 1909  | 1929 5.77177584311 |
| NM_005359    | SMAD4    | 318   | 340   | 8.17360484994      |
| NM_018725    | IL17RB   | 801   | 852   | 4.1236237808       |
| NM_012405    | ICMT     | 550   | 602   | 6.0664924629       |
| NM_004753    | DHRS3    | 576   | 634   | 5.25242435622      |
| NM_004753    | DHRS3    | 1104  | 1168  | 6.79582143392      |
| NM_004753    | DHRS3    | 959   | 1023  | 6.50648855949      |
| NM_004753    | DHRS3    | 866   | 926   | 4.92151933527      |
| NM_001503    | GPLD1    | 1802  | 1830  | 10.561927977       |
| NM_001505    | GPER     | 743   | 764   | 8.6498938275       |
| NM_022365    | DNAJC1   | 1064  | 1104  | 6.98445252394      |
| NM_022365    | DNAJC1   | 839   | 904   | 6.4836292326       |
| NM_022365    | DNAJC1   | 635   | 716   | 6.06457413315      |
| NM_006885    | ZFH3     | 11210 | 11253 | 9.83432527251      |
| NM_006885    | ZFH3     | 13886 | 13909 | 7.51239044657      |
| NM_006885    | ZFH3     | 2981  | 3023  | 6.51239717762      |
| NM_001083908 | DNAAF2   | 1191  | 1210  | 7.86897339746      |
| NM_018070    | SSBP3    | 8     | 39    | 4.84979401717      |
| NM_001198973 | KIAA1522 |       | 2337  | 2388 6.39296754659 |
| NM_001001894 | TTC3     | 1038  | 1059  | 4.53643862301      |
| NM_007224    | NXP4     | 467   | 519   | 11.8713313021      |
| NM_024734    | CLMN     | 6676  | 6696  | 7.87061205238      |

|              |          |      |      |               |               |
|--------------|----------|------|------|---------------|---------------|
| NM_153029    | N4BP1    | 2473 | 2492 | 7.13242298087 |               |
| NM_005505    | SCARB1   | 1443 | 1493 | 5.73450675861 |               |
| NM_005505    | SCARB1   | 1076 | 1106 | 6.14937051512 |               |
| NM_005505    | SCARB1   | 1374 | 1434 | 4.14552666527 |               |
| NM_005505    | SCARB1   | 886  | 919  | 6.46745476015 |               |
| NM_005505    | SCARB1   | 937  | 1068 | 7.9568991875  |               |
| NM_005505    | SCARB1   | 443  | 486  | 5.65036755678 |               |
| NM_005507    | CFL1     | 231  | 290  | 4.38163779246 |               |
| NM_005507    | CFL1     | 375  | 429  | 3.69954828718 |               |
| NM_005507    | CFL1     | 1076 | 1118 | 2.37762019229 |               |
| NM_005507    | CFL1     | 459  | 515  | 1.37762019229 |               |
| NM_005506    | SCARB2   | 1795 | 1868 | 8.43463682597 |               |
| NM_005506    | SCARB2   | 765  | 792  | 6.10869113091 |               |
| NM_005506    | SCARB2   | 1033 | 1086 | 8.57214034972 |               |
| NM_005506    | SCARB2   | 1606 | 1642 | 8.0285695217  |               |
| NM_005506    | SCARB2   | 869  | 906  | 7.11270200003 |               |
| NM_005506    | SCARB2   | 1425 | 1460 | 5.0285695217  |               |
| NM_005506    | SCARB2   | 1096 | 1122 | 7.10869113091 |               |
| NM_005506    | SCARB2   | 961  | 1000 | 7.92006364559 |               |
| NM_005506    | SCARB2   | 1192 | 1239 | 8.11270872353 |               |
| NM_006319    | CDIPT    | 927  | 993  | 7.66972142236 |               |
| NM_006319    | CDIPT    | 761  | 880  | 9.25485767318 |               |
| NM_006310    | NPEPPS   | 267  | 299  | 4.04723923915 |               |
| NM_006315    | PCGF3    | 1324 | 1348 | 6.90795705006 |               |
| NM_052853    | ADCK2    | 330  | 358  | 9.22055452343 |               |
| NM_032333    | C10orf58 |      | 492  | 533           | 5.93800105936 |
| NM_032333    | C10orf58 |      | 686  | 752           | 6.2010352295  |
| NM_032333    | C10orf58 |      | 342  | 390           | 5.61205536453 |
| NM_032333    | C10orf58 |      | 591  | 654           | 6.78599123509 |
| NM_032333    | C10orf58 |      | 409  | 479           | 6.20103546542 |
| NM_002414    | CD99     | 545  | 603  | 3.19976783231 |               |
| NM_002415    | MIF      | 52   | 107  | 3.22860744883 |               |
| NM_002415    | MIF      | 451  | 492  | 3.81373696881 |               |
| NM_177524    | MEST     | 782  | 849  | 9.86731482987 |               |
| NM_138349    | TP53I13  | 1165 | 1187 | 7.69168553329 |               |
| NM_138340    | ABHD3    | 474  | 524  | 9.43576424708 |               |
| NM_138340    | ABHD3    | 691  | 739  | 8.26583923808 |               |
| NM_138346    | KIAA2013 |      | 1256 | 1292          | 8.03255961612 |
| NM_001268    | RCBTB2   | 363  | 382  | 11.333612261  |               |
| NM_001142298 | SQSTM1   | 468  | 516  | 3.94240985233 |               |
| NM_001142298 | SQSTM1   | 1308 | 1394 | 6.52737258875 |               |
| NM_134270    | SMTN     | 101  | 151  | 8.49299761019 |               |
| NM_001024847 | TGFBR2   | 1988 | 2023 | 3.94372673955 |               |
| NM_001024847 | TGFBR2   | 839  | 890  | 6.66711620254 |               |
| NM_001196    | BID      | 130  | 185  | 8.16451820421 |               |
| NM_012218    | ILF3     | 1695 | 1764 | 5.39273876555 |               |
| NM_012218    | ILF3     | 179  | 201  | 3.38872140129 |               |
| NM_012214    | MGAT4A   | 514  | 532  | 5.37199638362 |               |
| NM_013995    | LAMP2    | 867  | 917  | 6.97507124614 |               |
| NM_013995    | LAMP2    | 443  | 479  | 7.39010874541 |               |

|           |          |      |      |                   |
|-----------|----------|------|------|-------------------|
| NM_013995 | LAMP2    | 784  | 827  | 6.62789763092     |
| NM_013995 | LAMP2    | 554  | 619  | 6.97507124592     |
| NM_013995 | LAMP2    | 1414 | 1444 | 4.30596953604     |
| NM_013995 | LAMP2    | 364  | 433  | 6.97507124614     |
| NM_013995 | LAMP2    | 1161 | 1209 | 5.97489749582     |
| NM_013995 | LAMP2    | 1021 | 1079 | 6.3899349951      |
| NM_000029 | AGT      | 1172 | 1341 | 6.15278504114     |
| NM_000029 | AGT      | 1399 | 1458 | 4.68712146879     |
| NM_000029 | AGT      | 642  | 672  | 2.2946302957      |
| NM_000029 | AGT      | 1602 | 1715 | 5.46472904746     |
| NM_000029 | AGT      | 791  | 864  | 3.29480404601     |
| NM_000029 | AGT      | 1715 | 1844 | 5.68712146879     |
| NM_000029 | AGT      | 1471 | 1590 | 4.99524376416     |
| NM_000029 | AGT      | 983  | 1108 | 3.29480404601     |
| NM_000029 | AGT      | 1853 | 1954 | 3.29480404601     |
| NM_000029 | AGT      | 873  | 982  | 4.46472904746     |
| NM_144732 | HNRNPUL1 |      | 798  | 838 4.29035224465 |
| NM_181501 | ITGA1    | 1365 | 1403 | 6.55863754622     |
| NM_181501 | ITGA1    | 1976 | 2006 | 7.13975619709     |
| NM_181501 | ITGA1    | 898  | 969  | 8.14377378971     |
| NM_181501 | ITGA1    | 2328 | 2382 | 7.55479369637     |
| NM_181501 | ITGA1    | 3491 | 3525 | 5.55479369637     |
| NM_181501 | ITGA1    | 1175 | 1276 | 8.72873629798     |
| NM_181501 | ITGA1    | 3092 | 3133 | 8.72471869781     |
| NM_181501 | ITGA1    | 2049 | 2094 | 6.55479369637     |
| NM_181501 | ITGA1    | 3214 | 3254 | 6.47467208715     |
| NM_181501 | ITGA1    | 481  | 572  | 7.55881129654     |
| NM_145061 | SKA3     | 174  | 192  | 7.50889880453     |
| NM_145061 | SKA3     | 2014 | 2034 | 9.09386130525     |
| NM_203463 | CERS6    | 1065 | 1106 | 8.83133842287     |
| NM_203463 | CERS6    | 969  | 1057 | 11.3749092507     |
| NM_032223 | PCNXL3   | 2572 | 2628 | 8.18027067855     |
| NM_032223 | PCNXL3   | 5510 | 5559 | 9.18027067855     |
| NM_004924 | ACTN4    | 3740 | 3784 | 3.79655939878     |
| NM_004924 | ACTN4    | 338  | 384  | 5.46566110889     |
| NM_004924 | ACTN4    | 82   | 150  | 5.29573587153     |
| NM_004924 | ACTN4    | 724  | 814  | 5.46566110134     |
| NM_004924 | ACTN4    | 1528 | 1594 | 4.87668100799     |
| NM_004924 | ACTN4    | 3680 | 3736 | 3.21159689806     |
| NM_004924 | ACTN4    | 1392 | 1470 | 3.29171850727     |
| NM_004924 | ACTN4    | 953  | 1021 | 3.88052485785     |
| NM_004924 | ACTN4    | 1257 | 1372 | 4.88069860817     |
| NM_004922 | SEC24C   | 2948 | 2969 | 6.35540203498     |
| NM_022821 | ELOVL1   | 587  | 631  | 9.41679410571     |
| NM_022821 | ELOVL1   | 803  | 855  | 10.228166392      |
| NM_014256 | B3GNT3   | 904  | 954  | 12.1431673917     |
| NM_014256 | B3GNT3   | 1029 | 1114 | 14.2273066011     |
| NM_014256 | B3GNT3   | 336  | 413  | 13.0346615156     |
| NM_002317 | LOX      | 891  | 924  | 7.75203779234     |
| NM_002312 | LIG4     | 2882 | 2928 | 8.25114046929     |

|              |          |      |      |                   |
|--------------|----------|------|------|-------------------|
| NM_024501    | HOXD1    | 262  | 283  | 12.9529363243     |
| NM_002153    | HSD17B2  | 900  | 933  | 6.92211998564     |
| NM_002153    | HSD17B2  | 622  | 690  | 7.50725623668     |
| NM_002153    | HSD17B2  | 1191 | 1231 | 7.09221850149     |
| NM_002153    | HSD17B2  | 727  | 767  | 6.50724950563     |
| NM_002153    | HSD17B2  | 872  | 899  | 5.4231170273      |
| NM_001144994 | C2orf72  | 791  | 824  | 9.3498215945      |
| NM_001144995 | CCDC85C  | 922  | 952  | 6.87510273988     |
| NM_001025300 | RAB12    | 231  | 261  | 3.95845355224     |
| NM_018126    | TMEM33   | 466  | 508  | 9.77983953341     |
| NM_018126    | TMEM33   | 763  | 817  | 11.1017676285     |
| NM_018126    | TMEM33   | 531  | 585  | 8.77966578332     |
| NM_018126    | TMEM33   | 951  | 1018 | 11.4802792518     |
| NM_014825    | URB1     | 3335 | 3354 | 8.28805064949     |
| NM_014820    | TOMM70A  | 3224 | 3267 | 5.53704210424     |
| NM_014822    | SEC24D   | 1973 | 1991 | 7.60235709221     |
| NM_001177413 | RPS27A   | 440  | 546  | 1.00478541624     |
| NM_001004333 | RNASEK   | 371  | 429  | 7.33116847346     |
| NM_001031    | RPS28    | 101  | 156  | 3.496887427       |
| NM_001031    | RPS28    | 215  | 283  | 3.75992856366     |
| NM_001030    | RPS27    | 187  | 229  | 2.98730441299     |
| NM_001520    | GTF3C1   | 39   | 98   | 8.52308763277     |
| NM_015030    | FRYL     | 1989 | 2011 | 9.7232322781      |
| NM_001204458 | TNFRSF19 |      | 313  | 344 7.46576667794 |
| NM_001204458 | TNFRSF19 |      | 438  | 511 7.38163419961 |
| NM_001031710 | KLHL7    | 1884 | 1924 | 6.96309860447     |
| NM_001031847 | CPT1A    | 2045 | 2138 | 6.91666240059     |
| NM_001031847 | CPT1A    | 858  | 894  | 6.65363471826     |
| NM_001031847 | CPT1A    | 593  | 632  | 5.83252992226     |
| NM_178148    | SLC35B2  | 1316 | 1381 | 6.47112651122     |
| NM_178148    | SLC35B2  | 652  | 682  | 6.38699403289     |
| NM_178148    | SLC35B2  | 1765 | 1797 | 6.38699403289     |
| NM_178148    | SLC35B2  | 528  | 562  | 7.05207814282     |
| NM_016219    | MAN1B1   | 1193 | 1245 | 6.07849115759     |
| NM_016219    | MAN1B1   | 2072 | 2121 | 4.49352865687     |
| NM_001204450 | CCPG1    | 2430 | 2477 | 5.32535095334     |
| NM_001204450 | CCPG1    | 1435 | 1514 | 8.86892178114     |
| NM_198977    | ARHGEF1  | 2010 | 2045 | 5.80799253048     |
| NM_001003962 | CAPNS1   | 176  | 206  | 4.09702667401     |
| NM_001003962 | CAPNS1   | 260  | 312  | 5.09702667401     |
| NM_000927    | ABCB1    | 957  | 1027 | 7.50521328625     |
| NM_000927    | ABCB1    | 1158 | 1195 | 8.3532101928      |
| NM_000927    | ABCB1    | 2295 | 2345 | 7.50503953593     |
| NM_000927    | ABCB1    | 846  | 876  | 6.17926759119     |
| NM_000927    | ABCB1    | 3986 | 4033 | 8.64271680999     |
| NM_000927    | ABCB1    | 1708 | 1791 | 6.18327846031     |
| NM_000927    | ABCB1    | 2709 | 2754 | 5.18311144104     |
| NM_000927    | ABCB1    | 1096 | 1125 | 7.50119568607     |
| NM_000927    | ABCB1    | 3622 | 3743 | 8.50521328625     |
| NM_000927    | ABCB1    | 1975 | 2005 | 7.17926759119     |

|              |        |       |       |               |
|--------------|--------|-------|-------|---------------|
| NM_000927    | ABCB1  | 1389  | 1437  | 7.9904663631  |
| NM_000927    | ABCB1  | 1881  | 1935  | 7.42107407686 |
| NM_000927    | ABCB1  | 3195  | 3261  | 7.76824769186 |
| NM_000927    | ABCB1  | 1461  | 1541  | 7.76824769208 |
| NM_000927    | ABCB1  | 1238  | 1354  | 8.64271681    |
| NM_000927    | ABCB1  | 3103  | 3191  | 7.99064011342 |
| NM_000927    | ABCB1  | 656   | 702   | 6.09914598198 |
| NM_000927    | ABCB1  | 2188  | 2263  | 6.18328518381 |
| NM_002334    | LRP4   | 13    | 37    | 8.9472649331  |
| NM_003969    | UBE2M  | 564   | 638   | 4.01761769371 |
| NM_003960    | NAT8   | 374   | 438   | 11.4127906228 |
| NM_003960    | NAT8   | 471   | 551   | 10.1903982015 |
| NM_003963    | TM4SF5 | 532   | 573   | 6.63066614688 |
| NM_003963    | TM4SF5 | 240   | 292   | 7.04570388208 |
| NM_003963    | TM4SF5 | 344   | 406   | 6.62664878262 |
| NM_024759    | NIPAL2 | 588   | 618   | 12.3637408844 |
| NM_024753    | TTC21B | 2382  | 2402  | 4.47525551034 |
| NM_001024629 | NRP1   | 2152  | 2208  | 10.1260689657 |
| NM_001024629 | NRP1   | 1423  | 1464  | 10.4609848558 |
| NM_001024629 | NRP1   | 1145  | 1219  | 11.5451173341 |
| NM_001024629 | NRP1   | 1803  | 1850  | 10.1260689657 |
| NM_001024629 | NRP1   | 753   | 800   | 9.46098485581 |
| NM_001024629 | NRP1   | 1471  | 1553  | 9.54512405765 |
| NM_001024629 | NRP1   | 2076  | 2113  | 8.54110646502 |
| NM_020123    | TM9SF3 | 1682  | 1726  | 7.43747533675 |
| NM_020123    | TM9SF3 | 1238  | 1272  | 5.65289640922 |
| NM_020123    | TM9SF3 | 1866  | 1935  | 6.05895698244 |
| NM_020123    | TM9SF3 | 1492  | 1540  | 6.32199811933 |
| NM_020123    | TM9SF3 | 907   | 942   | 5.73703561106 |
| NM_020123    | TM9SF3 | 796   | 842   | 6.54037294049 |
| NM_020123    | TM9SF3 | 1107  | 1157  | 6.05878996318 |
| NM_020123    | TM9SF3 | 633   | 667   | 5.31798051916 |
| NM_020123    | TM9SF3 | 975   | 1041  | 5.73301801844 |
| NM_005529    | HSPG2  | 984   | 1045  | 11.9116483517 |
| NM_005529    | HSPG2  | 12294 | 12325 | 9.92061854673 |
| NM_005529    | HSPG2  | 9575  | 9604  | 9.92061854673 |
| NM_005529    | HSPG2  | 8133  | 8168  | 10.0047575202 |
| NM_005529    | HSPG2  | 1098  | 1151  | 11.326685851  |
| NM_005529    | HSPG2  | 4687  | 4744  | 10.5897202493 |
| NM_005529    | HSPG2  | 8881  | 8936  | 10.326685851  |
| NM_005529    | HSPG2  | 7132  | 7171  | 7.92061854673 |
| NM_005529    | HSPG2  | 8707  | 8758  | 10.0047575202 |
| NM_005529    | HSPG2  | 5384  | 5429  | 10.3226682508 |
| NM_005529    | HSPG2  | 10540 | 10592 | 11.2425466416 |
| NM_005529    | HSPG2  | 491   | 589   | 9.00475774856 |
| NM_005529    | HSPG2  | 12626 | 12658 | 9.92061854673 |
| NM_005529    | HSPG2  | 12441 | 12484 | 9.92061854673 |
| NM_005529    | HSPG2  | 707   | 788   | 10.3266858435 |
| NM_005529    | HSPG2  | 7845  | 7903  | 10.3226682508 |
| NM_005529    | HSPG2  | 3685  | 3709  | 8.00074015594 |

|              |          |      |      |                    |
|--------------|----------|------|------|--------------------|
| NM_003786    | ABCC3    | 1202 | 1222 | 9.46393017579      |
| NM_003786    | ABCC3    | 3960 | 4016 | 10.1167632916      |
| NM_003786    | ABCC3    | 3792 | 3859 | 9.87896767507      |
| NM_006332    | IFI30    | 750  | 779  | 10.9182186547      |
| NM_006332    | IFI30    | 238  | 358  | 14.6908148896      |
| NM_006332    | IFI30    | 363  | 412  | 13.0337026032      |
| NM_006332    | IFI30    | 564  | 684  | 14.6908148896      |
| NM_006332    | IFI30    | 48   | 183  | 13.9182253857      |
| NM_006332    | IFI30    | 414  | 564  | 15.2401534806      |
| NM_006332    | IFI30    | 944  | 989  | 10.8340861764      |
| NM_006332    | IFI30    | 875  | 930  | 11.9182186547      |
| NM_006332    | IFI30    | 814  | 862  | 10.9180516354      |
| NM_005787    | ALG3     | 976  | 1012 | 7.8238178409       |
| NM_005787    | ALG3     | 842  | 874  | 7.90393945011      |
| NM_005787    | ALG3     | 408  | 449  | 9.32298781851      |
| NM_002787    | PSMA2    | 583  | 607  | 4.94532366683      |
| NM_001034025 | ERP29    | 632  | 701  | 7.74346301265      |
| NM_001034025 | ERP29    | 545  | 618  | 7.74346301265      |
| NM_001034025 | ERP29    | 265  | 344  | 8.03296962985      |
| NM_052831    | C6orf192 |      | 1319 | 1356 10.7795791117 |
| NM_001084    | PL0D3    | 1373 | 1453 | 8.95609948984      |
| NM_001084    | PL0D3    | 2311 | 2354 | 8.30402279304      |
| NM_001084    | PL0D3    | 1760 | 1827 | 7.81859596609      |
| NM_001084    | PL0D3    | 2017 | 2079 | 7.08163036438      |
| NM_001084    | PL0D3    | 2137 | 2175 | 8.08163037171      |
| NM_001084    | PL0D3    | 1604 | 1656 | 6.49666763529      |
| NM_001084    | PL0D3    | 985  | 1080 | 9.58413071246      |
| NM_001084    | PL0D3    | 1089 | 1196 | 9.40355846682      |
| NM_001084    | PL0D3    | 2459 | 2589 | 10.3040227933      |
| NM_001084    | PL0D3    | 630  | 790  | 9.81859596609      |
| NM_001084    | PL0D3    | 1248 | 1332 | 6.49666786366      |
| NM_022117    | TSPYL2   | 2190 | 2209 | 4.28296784605      |
| NM_030926    | ITM2C    | 621  | 688  | 7.6561726695       |
| NM_021139    | UGT2B4   | 52   | 92   | 9.01626667711      |
| NM_021139    | UGT2B4   | 1577 | 1622 | 9.69835618239      |
| NM_021139    | UGT2B4   | 910  | 988  | 9.50571110445      |
| NM_021139    | UGT2B4   | 1406 | 1450 | 9.69835618217      |
| NM_021139    | UGT2B4   | 1511 | 1566 | 10.2833186831      |
| NM_021139    | UGT2B4   | 777  | 809  | 9.19917947373      |
| NM_021139    | UGT2B4   | 1073 | 1127 | 9.69835618239      |
| NM_021139    | UGT2B4   | 1044 | 1069 | 7.69835617484      |
| NM_021139    | UGT2B4   | 306  | 355  | 6.61421697301      |
| NM_021139    | UGT2B4   | 862  | 900  | 8.28331844719      |
| NM_021139    | UGT2B4   | 580  | 651  | 9.02028427728      |
| NM_021139    | UGT2B4   | 474  | 538  | 9.02028427706      |
| NM_021139    | UGT2B4   | 1250 | 1312 | 10.1577878008      |
| NM_021130    | PPIA     | 417  | 468  | 2.23243509166      |
| NM_021130    | PPIA     | 164  | 227  | 3.31657430105      |
| NM_021130    | PPIA     | 318  | 348  | 1.4954694975       |
| NM_021130    | PPIA     | 488  | 592  | 3.99464620616      |

|              |          |      |      |                    |
|--------------|----------|------|------|--------------------|
| NM_030928    | CDT1     | 1985 | 2012 | 9.68860178631      |
| NM_019088    | PAF1     | 1566 | 1595 | 6.13985624437      |
| NM_148170    | CTSC     | 358  | 401  | 8.92552967973      |
| NM_148170    | CTSC     | 250  | 347  | 8.11817475767      |
| NM_017623    | CNNM3    | 261  | 282  | 7.25457038353      |
| NM_017623    | CNNM3    | 888  | 919  | 7.25457038353      |
| NM_017626    | DNAJB12  | 413  | 434  | 7.10246588573      |
| NM_017629    | EIF2C4   | 111  | 141  | 6.8666950851       |
| NM_012234    | RYBP     | 22   | 49   | 4.05914931794      |
| NM_004491    | ARHGAP35 |      | 6272 | 6305 6.30871565931 |
| NM_004491    | ARHGAP35 |      | 7276 | 7339 5.97781713349 |
| NM_181521    | CMTM4    | 72   | 114  | 8.69018125702      |
| NM_181523    | PIK3R1   | 4976 | 5024 | 7.96646245588      |
| NM_006923    | SDF2     | 661  | 726  | 9.31605767685      |
| NM_006927    | ST3GAL2  | 33   | 68   | 9.43908139938      |
| NM_001164319 | FLNB     | 3205 | 3243 | 4.04133574547      |
| NM_003204    | NFE2L1   | 2673 | 2764 | 7.24753927171      |
| NM_003204    | NFE2L1   | 698  | 756  | 5.12804445412      |
| NM_003204    | NFE2L1   | 1860 | 1909 | 5.13206181837      |
| NM_003204    | NFE2L1   | 1231 | 1368 | 6.71702455501      |
| NM_003205    | TCF12    | 987  | 1008 | 5.86671579934      |
| NM_017952    | PTCD3    | 5410 | 5443 | 5.65588843945      |
| NM_004273    | CHST3    | 1552 | 1571 | 9.83488845361      |
| NM_001042466 | PSAP     | 552  | 630  | 6.40611792777      |
| NM_001042466 | PSAP     | 1646 | 1704 | 4.87560321107      |
| NM_001042466 | PSAP     | 1932 | 1991 | 3.29064071035      |
| NM_001042466 | PSAP     | 672  | 862  | 8.14862170548      |
| NM_001042466 | PSAP     | 1398 | 1440 | 3.70567820963      |
| NM_001042466 | PSAP     | 1227 | 1397 | 7.81420266641      |
| NM_001042466 | PSAP     | 2224 | 2275 | 4.02759957346      |
| NM_001042466 | PSAP     | 1568 | 1633 | 5.95360572307      |
| NM_001042466 | PSAP     | 1725 | 1797 | 5.40611792777      |
| NM_001042466 | PSAP     | 302  | 527  | 7.91513157526      |
| NM_001042466 | PSAP     | 148  | 273  | 6.65987452002      |
| NM_001042466 | PSAP     | 1448 | 1567 | 7.77176740009      |
| NM_001042466 | PSAP     | 2379 | 2478 | 5.70567820963      |
| NM_001042466 | PSAP     | 2612 | 2660 | 3.70166060946      |
| NM_001042466 | PSAP     | 2479 | 2562 | 4.02759957346      |
| NM_001042466 | PSAP     | 1997 | 2087 | 5.16510982827      |
| NM_001042466 | PSAP     | 887  | 1218 | 8.6943628964       |
| NM_001042466 | PSAP     | 48   | 130  | 3.29064047443      |
| NM_015885    | PCF11    | 3230 | 3249 | 6.00694512218      |
| NM_001098577 | RPL31    | 303  | 367  | 0.247268093523     |
| NM_001098577 | RPL31    | 187  | 281  | 0.832230830157     |
| NM_001199878 | SERF2    | 2099 | 2118 | 1.71789022062      |
| NM_013336    | SEC61A1  | 772  | 819  | 7.40448376014      |
| NM_013336    | SEC61A1  | 1404 | 1439 | 7.66751816598      |
| NM_013336    | SEC61A1  | 2655 | 2696 | 6.66734442321      |
| NM_013336    | SEC61A1  | 1649 | 1705 | 7.32034455831      |
| NM_013336    | SEC61A1  | 2900 | 2956 | 7.40046616752      |

|              |         |       |       |               |
|--------------|---------|-------|-------|---------------|
| NM_013336    | SEC61A1 | 1120  | 1186  | 8.25248067425 |
| NM_013336    | SEC61A1 | 651   | 736   | 8.40448376769 |
| NM_013336    | SEC61A1 | 953   | 981   | 6.99841646342 |
| NM_013336    | SEC61A1 | 1450  | 1490  | 7.88973684455 |
| NM_013336    | SEC61A1 | 1547  | 1573  | 6.07853807263 |
| NM_013336    | SEC61A1 | 1273  | 1344  | 9.83744317497 |
| NM_013336    | SEC61A1 | 889   | 940   | 5.99841646342 |
| NM_013336    | SEC61A1 | 408   | 475   | 8.40448376769 |
| NM_013336    | SEC61A1 | 1504  | 1545  | 5.99841646342 |
| NM_013336    | SEC61A1 | 572   | 633   | 7.08255567281 |
| NM_013336    | SEC61A1 | 268   | 335   | 7.66751817353 |
| NM_013336    | SEC61A1 | 2223  | 2320  | 8.08255566526 |
| NM_001012614 | CTBP1   | 944   | 1008  | 5.1703700809  |
| NM_001012614 | CTBP1   | 261   | 335   | 6.17053710016 |
| NM_002332    | LRP1    | 8848  | 8886  | 6.31489798432 |
| NM_002332    | LRP1    | 9369  | 9423  | 7.18937383328 |
| NM_002332    | LRP1    | 13911 | 13948 | 5.64580300527 |
| NM_002332    | LRP1    | 703   | 738   | 5.23076550599 |
| NM_002332    | LRP1    | 8574  | 8630  | 6.53712338639 |
| NM_002332    | LRP1    | 9313  | 9355  | 5.31473096506 |
| NM_002332    | LRP1    | 9920  | 9961  | 5.3108871152  |
| NM_002332    | LRP1    | 13007 | 13046 | 6.23076550599 |
| NM_002332    | LRP1    | 11841 | 11876 | 4.72592461448 |
| NM_002332    | LRP1    | 3436  | 3488  | 5.72592461448 |
| NM_002332    | LRP1    | 3302  | 3379  | 6.05187030954 |
| NM_002332    | LRP1    | 11231 | 11284 | 5.72592461448 |
| NM_002332    | LRP1    | 9238  | 9297  | 6.05186357849 |
| NM_002332    | LRP1    | 10513 | 10547 | 4.64580300527 |
| NM_002332    | LRP1    | 4910  | 4958  | 3.64580300527 |
| NM_002332    | LRP1    | 2284  | 2332  | 4.72994221443 |
| NM_002332    | LRP1    | 8185  | 8255  | 5.72592461448 |
| NM_002332    | LRP1    | 1610  | 1654  | 4.72592461448 |
| NM_002332    | LRP1    | 10975 | 11044 | 6.05186357849 |
| NM_002332    | LRP1    | 11742 | 11792 | 6.3108871152  |
| NM_002332    | LRP1    | 7480  | 7528  | 4.64580300527 |
| NM_002332    | LRP1    | 5423  | 5502  | 5.72592461448 |
| NM_002337    | LRPAP1  | 813   | 845   | 3.38172459423 |
| NM_002337    | LRPAP1  | 1325  | 1346  | 2.79676209351 |
| NM_002337    | LRPAP1  | 536   | 607   | 5.7877918985  |
| NM_002337    | LRPAP1  | 847   | 888   | 3.88089457184 |
| NM_002337    | LRPAP1  | 641   | 719   | 5.34033292153 |
| NM_002337    | LRPAP1  | 1249  | 1314  | 4.87688370272 |
| NM_002337    | LRPAP1  | 1006  | 1195  | 5.68825622495 |
| NM_002337    | LRPAP1  | 1195  | 1223  | 3.38172459423 |
| NM_002337    | LRPAP1  | 430   | 535   | 6.34033292153 |
| NM_002337    | LRPAP1  | 250   | 417   | 7.01018431984 |
| NM_002844    | PTPRK   | 2321  | 2358  | 5.80070455674 |
| NM_002844    | PTPRK   | 1520  | 1558  | 6.14787816441 |
| NM_002844    | PTPRK   | 3560  | 3592  | 4.47877646186 |
| NM_002844    | PTPRK   | 1828  | 1862  | 6.37027059308 |



|              |          |      |      |                  |
|--------------|----------|------|------|------------------|
| NM_002844    | PTPRK    | 3335 | 3381 | 5.56290894019    |
| NM_002844    | PTPRK    | 721  | 776  | 5.55889807107    |
| NM_002844    | PTPRK    | 441  | 510  | 5.14787144091    |
| NM_002335    | LRP5     | 1510 | 1551 | 4.07564020757    |
| NM_002335    | LRP5     | 816  | 882  | 3.07179635772    |
| NM_002335    | LRP5     | 1747 | 1776 | 2.99167474851    |
| NM_002335    | LRP5     | 4793 | 4839 | 5.3136028434     |
| NM_002335    | LRP5     | 4912 | 4981 | 5.07580722684    |
| NM_002335    | LRP5     | 1879 | 1953 | 6.07581395789    |
| NM_002335    | LRP5     | 2326 | 2374 | 6.24573895933    |
| NM_002335    | LRP5     | 2667 | 2715 | 5.88299512963    |
| NM_002335    | LRP5     | 3460 | 3529 | 4.07564020757    |
| NM_002335    | LRP5     | 1256 | 1339 | 4.66077645861    |
| NM_002335    | LRP5     | 406  | 437  | 3.07179635772    |
| NM_002335    | LRP5     | 274  | 384  | 7.32374147134    |
| NM_002335    | LRP5     | 1080 | 1118 | 5.07564020757    |
| NM_002335    | LRP5     | 4166 | 4224 | 6.53524557653    |
| NM_002335    | LRP5     | 3105 | 3135 | 5.07179635772    |
| NM_002335    | LRP5     | 1456 | 1508 | 5.66060270829    |
| NM_002335    | LRP5     | 4579 | 4635 | 5.39774181686    |
| NM_002335    | LRP5     | 3853 | 3904 | 4.66060270829    |
| NM_002335    | LRP5     | 2517 | 2575 | 4.57663724923    |
| NM_002335    | LRP5     | 454  | 553  | 5.66077645861    |
| NM_002335    | LRP5     | 3909 | 3986 | 4.66077622269    |
| NM_002335    | LRP5     | 3567 | 3689 | 5.39774205278    |
| NM_002335    | LRP5     | 2428 | 2508 | 6.24573895933    |
| NM_001126102 | HP       | 970  | 1017 | 5.08546641156    |
| NM_001126102 | HP       | 154  | 190  | 4.58628971044    |
| NM_018142    | INTS10   | 31   | 58   | 4.47384523055    |
| NM_014593    | CXXC1    | 565  | 584  | 6.65254715705    |
| NM_080725    | SRXN1    | 219  | 239  | 11.0534607552    |
| NM_005319    | HIST1H1C |      | 31   | 91 10.9012207188 |
| NM_005313    | PDIA3    | 762  | 833  | 4.97959037102    |
| NM_005313    | PDIA3    | 691  | 759  | 4.65766227613    |
| NM_005313    | PDIA3    | 1548 | 1599 | 1.06868217524    |
| NM_005313    | PDIA3    | 188  | 349  | 5.59626173147    |
| NM_005313    | PDIA3    | 901  | 1425 | 7.35810199427    |
| NM_005313    | PDIA3    | 430  | 539  | 4.97959037102    |
| NM_005313    | PDIA3    | 1763 | 1836 | 2.65364467596    |
| NM_001079524 | PAICS    | 1271 | 1331 | 3.88173509453    |
| NM_001079524 | PAICS    | 1002 | 1108 | 4.55083679709    |
| NM_152850    | PIGO     | 1902 | 1928 | 9.41021087722    |
| NM_152850    | PIGO     | 1301 | 1324 | 10.079138837     |
| NM_016056    | TMBIM4   | 420  | 470  | 9.0237027151     |
| NM_001008530 | LGMN     | 1060 | 1101 | 5.39615882549    |
| NM_001008530 | LGMN     | 1571 | 1598 | 6.39214122532    |
| NM_001008530 | LGMN     | 916  | 970  | 6.71808018933    |
| NM_001008530 | LGMN     | 798  | 829  | 5.89698211683    |
| NM_001008539 | SLC7A2   | 885  | 952  | 7.1847764841     |
| NM_001008539 | SLC7A2   | 1033 | 1070 | 5.59580311426    |

|              |            |      |      |                   |
|--------------|------------|------|------|-------------------|
| NM_001008539 | SLC7A2     | 745  | 835  | 6.59982071444     |
| NM_173852    | KRTCAP2    | 310  | 371  | 10.4870189496     |
| NM_016946    | F11R       | 564  | 616  | 8.08496040912     |
| NM_016946    | F11R       | 298  | 356  | 6.76285856392     |
| NM_016946    | F11R       | 697  | 759  | 8.76303231424     |
| NM_016946    | F11R       | 356  | 398  | 7.26385560557     |
| NM_016946    | F11R       | 414  | 474  | 9.93295731568     |
| NM_016946    | F11R       | 776  | 845  | 8.76303231424     |
| NM_016946    | F11R       | 1045 | 1094 | 8.57038050524     |
| NM_016946    | F11R       | 1199 | 1260 | 8.57038050524     |
| NM_016946    | F11R       | 847  | 1024 | 10.7172286246     |
| NM_001040874 | HIST2H2AA4 |      | 316  | 358 6.80440377656 |
| NM_001013    | RPS9       | 117  | 166  | 4.05381447934     |
| NM_001013    | RPS9       | 524  | 559  | 3.05364073657     |
| NM_001010    | RPS6       | 387  | 427  | -1.33721822594    |
| NM_001540    | HSPB1      | 456  | 490  | 8.11566459655     |
| NM_001014    | RPS10      | 333  | 378  | 2.27061760931     |
| NM_001014    | RPS10      | 537  | 582  | 2.85558034595     |
| NM_000942    | PPIB       | 736  | 803  | 2.85970074088     |
| NM_000942    | PPIB       | 665  | 722  | 2.4446632416      |
| NM_000942    | PPIB       | 155  | 191  | -0.140473009437   |
| NM_000942    | PPIB       | 206  | 264  | -0.224438468503   |
| NM_000942    | PPIB       | 442  | 607  | 5.06915410651     |
| NM_000942    | PPIB       | 309  | 432  | 4.25201816366     |
| NM_000942    | PPIB       | 833  | 937  | 1.85970074088     |
| NM_000940    | PON3       | 158  | 213  | 10.7537861202     |
| NM_000940    | PON3       | 807  | 872  | 10.2643416928     |
| NM_000941    | POR        | 1478 | 1534 | 5.32223216035     |
| NM_000941    | POR        | 2085 | 2122 | 3.31838831049     |
| NM_000941    | POR        | 352  | 385  | 2.23826670128     |
| NM_000941    | POR        | 1323 | 1360 | 4.64031640538     |
| NM_000941    | POR        | 1104 | 1153 | 5.12975410167     |
| NM_000941    | POR        | 1914 | 1960 | 2.32239917961     |
| NM_000941    | POR        | 814  | 845  | 3.823229202       |
| NM_000941    | POR        | 926  | 984  | 4.90736841139     |
| NM_000941    | POR        | 989  | 1085 | 4.64433400555     |
| NM_000941    | POR        | 546  | 618  | 6.32240591067     |
| NM_000941    | POR        | 389  | 459  | 4.32240591066     |
| NM_000941    | POR        | 640  | 802  | 7.18038690579     |
| NM_000941    | POR        | 2151 | 2235 | 4.32239917961     |
| NM_003945    | ATP6V0E1   |      | 131  | 168 9.67299293865 |
| NM_001194998 | CEP152     | 2198 | 2221 | 7.80752208083     |
| NM_001080410 | FBX041     | 1341 | 1361 | 9.94939864927     |
| NM_017548    | CDV3       | 594  | 613  | 3.67135780796     |
| NM_017542    | POGK       | 82   | 102  | 7.8357297112      |
| NM_032015    | RNF26      | 1989 | 2037 | 8.66142844742     |
| NM_001001851 | ITIH5      | 2133 | 2153 | 10.5572920481     |
| NM_001199111 | MDH1       | 397  | 435  | 5.2130520523      |
| NM_005811    | GDF11      | 120  | 166  | 10.1868858153     |
| NM_032374    | APOPT1     | 266  | 286  | 4.36184998655     |

|              |         |      |      |                |
|--------------|---------|------|------|----------------|
| NM_032376    | TMEM101 | 621  | 669  | 8.06248476633  |
| NM_001184741 | FGB     | 303  | 338  | 3.12677248896  |
| NM_001184741 | FGB     | 675  | 751  | 5.0653719443   |
| NM_001184741 | FGB     | 1244 | 1289 | 2.86373807558  |
| NM_001184741 | FGB     | 547  | 590  | 3.3491649103   |
| NM_001184741 | FGB     | 951  | 981  | 1.45767077886  |
| NM_001184741 | FGB     | 1138 | 1170 | 0.457670778859 |
| NM_001184741 | FGB     | 594  | 627  | 2.54163623792  |
| NM_001184741 | FGB     | 1089 | 1114 | 1.45767077886  |
| NM_001184741 | FGB     | 394  | 514  | 5.29669749041  |
| NM_001184741 | FGB     | 756  | 816  | 4.24224970638  |
| NM_001184741 | FGB     | 849  | 945  | 4.3491649103   |
| NM_001184740 | CTTN    | 315  | 350  | 5.04815489546  |
| NM_014164    | FXYD5   | 388  | 440  | 10.1565526907  |
| NM_018849    | ABCB4   | 1293 | 1339 | 8.29215141275  |
| NM_018849    | ABCB4   | 2120 | 2145 | 5.71103276189  |
| NM_018847    | KLHL9   | 1017 | 1038 | 8.70218508342  |
| NM_001040092 | ENPP2   | 2269 | 2332 | 10.1179673335  |
| NM_001040092 | ENPP2   | 1617 | 1653 | 10.3810017318  |
| NM_001040092 | ENPP2   | 501  | 545  | 7.79202163846  |
| NM_022130    | GOLPH3  | 410  | 430  | 4.32796281401  |
| NM_199141    | CARM1   | 13   | 70   | 6.10218316404  |
| NM_001487    | BLOC1S1 | 366  | 402  | 5.66541351443  |
| NM_006904    | PRKDC   | 7403 | 7450 | 7.96063818952  |
| NM_006908    | RAC1    | 243  | 301  | 6.23966134451  |
| NM_006908    | RAC1    | 388  | 433  | 4.43615027231  |
| NM_030943    | AMN     | 769  | 803  | 8.05144811077  |
| NM_030943    | AMN     | 285  | 333  | 10.0476042609  |
| NM_003883    | HDAC3   | 3    | 41   | 4.52741399937  |
| NM_020246    | SLC12A9 | 2131 | 2189 | 10.6943665894  |
| NM_020242    | KIF15   | 2824 | 2843 | 5.58352916381  |
| NM_032810    | ATAD1   | 1077 | 1137 | 5.10015873609  |
| NM_000689    | ALDH1A1 | 1718 | 1756 | 2.94218691947  |
| NM_000689    | ALDH1A1 | 1228 | 1295 | 5.26813237861  |
| NM_000683    | ADRA2C  | 1166 | 1237 | 10.9206665365  |
| NM_025141    | TM2D3   | 474  | 526  | 6.51588046353  |
| NM_025146    | NAA50   | 2125 | 2154 | 4.97697070389  |
| NM_024896    | ERMP1   | 1507 | 1552 | 7.07837201634  |
| NM_182810    | ATF4    | 1339 | 1398 | 2.11278852525  |
| NM_001145064 | GATSL2  | 143  | 177  | 8.46144873809  |
| NM_013319    | UBIAD1  | 858  | 903  | 10.1506806286  |
| NM_024092    | TMEM109 | 786  | 851  | 11.7842547256  |
| NM_024092    | TMEM109 | 1480 | 1526 | 11.9362578191  |
| NM_024092    | TMEM109 | 937  | 1004 | 10.6143297242  |
| NM_024092    | TMEM109 | 538  | 587  | 11.9362578191  |
| NM_024092    | TMEM109 | 654  | 717  | 12.6143297242  |
| NM_024092    | TMEM109 | 1020 | 1059 | 10.1952746247  |
| NM_024092    | TMEM109 | 851  | 914  | 9.61432299312  |
| NM_003089    | SNRNP70 | 295  | 357  | 5.08421366185  |
| NM_002868    | RAB5B   | 4593 | 4613 | 4.23944957562  |

|              |          |      |      |                    |
|--------------|----------|------|------|--------------------|
| NM_002864    | PZP      | 3268 | 3316 | 9.20273491326      |
| NM_002864    | PZP      | 3799 | 3826 | 8.11859570387      |
| NM_002864    | PZP      | 2506 | 2530 | 6.11859570387      |
| NM_002864    | PZP      | 183  | 225  | 10.2901977545      |
| NM_002864    | PZP      | 1714 | 1736 | 7.78769717806      |
| NM_002864    | PZP      | 2356 | 2470 | 10.787697414       |
| NM_002864    | PZP      | 2292 | 2326 | 8.2027281822       |
| NM_002864    | PZP      | 3636 | 3715 | 8.20273491326      |
| NM_002862    | PYGB     | 3348 | 3369 | 6.07724524269      |
| NM_024541    | C10orf76 |      | 3075 | 3098 9.57174923006 |
| NM_080913    | ASGR2    | 753  | 798  | 4.40508307915      |
| NM_080913    | ASGR2    | 699  | 752  | 4.40508284346      |
| NM_080913    | ASGR2    | 363  | 404  | 4.80637069716      |
| NM_080913    | ASGR2    | 256  | 315  | 3.66409988504      |
| NM_080913    | ASGR2    | 622  | 699  | 4.66811748499      |
| NM_080913    | ASGR2    | 905  | 1085 | 7.17061782574      |
| NM_130786    | A1BG     | 769  | 820  | 6.86815132371      |
| NM_130786    | A1BG     | 600  | 647  | 7.53724630276      |
| NM_014573    | TMEM97   | 217  | 259  | 6.93697971187      |
| NM_014573    | TMEM97   | 414  | 516  | 8.81546642996      |
| NM_001038603 | MARVELD2 |      | 1838 | 1878 7.92876527664 |
| NM_003621    | PPFIBP2  | 465  | 486  | 7.03937771518      |
| NM_018475    | TMEM165  | 868  | 931  | 8.52739598222      |
| NM_207113    | SLC37A3  | 701  | 760  | 8.25682047332      |
| NM_005660    | SLC35A2  | 755  | 798  | 10.425853855       |
| NM_005669    | REEP5    | 595  | 623  | 6.60650533693      |
| NM_005669    | REEP5    | 559  | 585  | 7.27158944686      |
| NM_005669    | REEP5    | 627  | 667  | 5.69047079599      |
| NM_145246    | FRA10AC1 |      | 21   | 53 4.99346930683   |
| NM_152523    | CCNYL1   | 160  | 179  | 7.49427306679      |
| NM_030938    | VMP1     | 634  | 671  | 3.90630646465      |
| NM_030938    | VMP1     | 280  | 343  | 7.49527983449      |
| NM_030938    | VMP1     | 1349 | 1409 | 5.49527983449      |
| NM_030938    | VMP1     | 1037 | 1120 | 7.08024906627      |
| NM_030938    | VMP1     | 782  | 860  | 5.49528656555      |
| NM_001098825 | TMEM91   | 101  | 128  | 8.57796180292      |
| NM_015047    | KIAA0090 |      | 2064 | 2145 8.81404630402 |
| NM_015047    | KIAA0090 |      | 1282 | 1334 7.13597439891 |
| NM_015047    | KIAA0090 |      | 1760 | 1793 7.39499120457 |
| NM_015047    | KIAA0090 |      | 697  | 760 4.81403957297  |
| NM_001016    | RPS12    | 98   | 156  | 1.38007465207      |
| NM_001018161 | PON2     | 617  | 656  | 6.9192279267       |
| NM_001018161 | PON2     | 1051 | 1099 | 7.48716564981      |
| NM_001018161 | PON2     | 121  | 186  | 5.11169949024      |
| NM_001018161 | PON2     | 218  | 295  | 7.43380133545      |
| NM_001402    | EEF1A1   | 87   | 158  | -0.3057366584      |
| NM_001402    | EEF1A1   | 629  | 672  | -0.305736658406    |
| NM_001402    | EEF1A1   | 164  | 217  | -0.3057366584      |
| NM_001402    | EEF1A1   | 1382 | 1418 | -1.89087290944     |
| NM_001402    | EEF1A1   | 562  | 588  | -3.47967926002     |

|              |          |      |      |                   |
|--------------|----------|------|------|-------------------|
| NM_001402    | EEF1A1   | 1315 | 1367 | -1.15373356496    |
| NM_001402    | EEF1A1   | 1543 | 1611 | -1.89070589018    |
| NM_001402    | EEF1A1   | 226  | 471  | 2.75315703065     |
| NM_001402    | EEF1A1   | 1177 | 1262 | -0.890699159122   |
| NM_001402    | EEF1A1   | 709  | 808  | 0.916655762936    |
| NM_001402    | EEF1A1   | 824  | 1063 | 2.33169326221     |
| NM_001402    | EEF1A1   | 489  | 545  | -2.47566165985    |
| NM_004046    | ATP5A1   | 1351 | 1383 | 3.16451460885     |
| NM_004048    | B2M      | 529  | 588  | 6.65928239504     |
| NM_004048    | B2M      | 444  | 473  | 2.75238507593     |
| NM_004048    | B2M      | 184  | 444  | 9.63503485635     |
| NM_004048    | B2M      | 37   | 126  | 5.07431990187     |
| NM_004048    | B2M      | 779  | 859  | 4.75238507593     |
| NM_000967    | RPL3     | 349  | 403  | 1.24912031607     |
| NM_000214    | JAG1     | 2399 | 2444 | 5.44412478781     |
| NM_000214    | JAG1     | 3731 | 3779 | 5.766226633       |
| NM_000214    | JAG1     | 1819 | 1857 | 5.44028093795     |
| NM_000968    | RPL4     | 780  | 868  | 2.09507071491     |
| NM_000765    | CYP3A7   | 1216 | 1237 | 8.53335674465     |
| NM_017780    | CHD7     | 0    | 48   | 5.77064313126     |
| NM_001042678 | RHOC     | 514  | 539  | 4.43067294747     |
| NM_199337    | TMEM179B |      | 535  | 602 9.46473677568 |
| NM_001080434 | LMTK3    | 4342 | 4369 | 13.2223208574     |
| NM_001135208 | FKBP2    | 278  | 349  | 7.98007051932     |
| NM_001145144 | SLC1A5   | 1539 | 1589 | 6.59437293724     |
| NM_001145144 | SLC1A5   | 458  | 539  | 6.27244484235     |
| NM_001145144 | SLC1A5   | 553  | 596  | 5.68748234163     |
| NM_001145144 | SLC1A5   | 615  | 673  | 6.00941043652     |
| NM_001145144 | SLC1A5   | 1251 | 1290 | 5.4106980543      |
| NM_001145144 | SLC1A5   | 142  | 248  | 7.14691396027     |
| NM_001145144 | SLC1A5   | 282  | 419  | 7.00941043652     |
| NM_001145144 | SLC1A5   | 1137 | 1208 | 5.49483726369     |
| NM_001145144 | SLC1A5   | 803  | 1030 | 8.70985015466     |
| NM_006374    | STK25    | 1206 | 1240 | 4.60128748249     |
| NM_018641    | CHST12   | 1198 | 1247 | 8.55677071262     |
| NM_015548    | DST      | 993  | 1014 | 4.4636115824      |
| NM_001130144 | LTBP3    | 3346 | 3395 | 8.7079782539      |
| NM_001130144 | LTBP3    | 2596 | 2670 | 10.7119958541     |
| NM_033049    | MUC13    | 920  | 964  | 14.2399829392     |
| NM_033049    | MUC13    | 997  | 1066 | 13.8680141618     |
| NM_033049    | MUC13    | 1396 | 1432 | 12.950476322      |
| NM_033049    | MUC13    | 787  | 891  | 14.8249454399     |
| NM_033049    | MUC13    | 1178 | 1336 | 13.8680141618     |
| NM_001099692 | EIF5AL1  | 416  | 468  | 3.26160886606     |
| NM_147782    | CTSB     | 700  | 778  | 3.81456810515     |
| NM_147782    | CTSB     | 859  | 904  | 3.64464983475     |
| NM_147782    | CTSB     | 385  | 424  | 3.81457483598     |
| NM_147782    | CTSB     | 524  | 630  | 2.9665779221      |
| NM_147782    | CTSB     | 994  | 1048 | 2.96657792943     |
| NM_147782    | CTSB     | 1240 | 1290 | 1.64063223459     |

|              |         |      |      |               |
|--------------|---------|------|------|---------------|
| NM_147782    | CTSB    | 1189 | 1239 | 2.96657792964 |
| NM_004458    | ACSL4   | 352  | 400  | 3.12112945718 |
| NM_004458    | ACSL4   | 1197 | 1246 | 4.0530918228  |
| NM_004458    | ACSL4   | 1258 | 1295 | 3.20526866656 |
| NM_004458    | ACSL4   | 1941 | 1989 | 2.46428547223 |
| NM_004458    | ACSL4   | 1102 | 1133 | 2.87932297151 |
| NM_004450    | ERH     | 321  | 363  | 4.86764332088 |
| NM_004186    | SEMA3F  | 358  | 392  | 9.02937440321 |
| NM_004185    | WNT2B   | 1477 | 1500 | 12.8122691018 |
| NM_000512    | GALNS   | 1243 | 1261 | 8.06131715462 |
| NM_001142276 | APLP2   | 1505 | 1607 | 4.62518742242 |
| NM_001142276 | APLP2   | 2326 | 2385 | 3.84757984375 |
| NM_001142276 | APLP2   | 753  | 812  | 3.49965654033 |
| NM_001142276 | APLP2   | 1621 | 1673 | 2.36215278066 |
| NM_001142276 | APLP2   | 1175 | 1251 | 3.49965654033 |
| NM_001142276 | APLP2   | 74   | 131  | 3.04022492169 |
| NM_001142276 | APLP2   | 2503 | 2547 | 2.35813541641 |
| NM_001142276 | APLP2   | 550  | 607  | 3.84757984375 |
| NM_001142276 | APLP2   | 2120 | 2204 | 1.62518069136 |
| NM_001142276 | APLP2   | 318  | 406  | 4.28815243514 |
| NM_001142276 | APLP2   | 1863 | 1940 | 3.49965654033 |
| NM_001142276 | APLP2   | 992  | 1094 | 3.62518742242 |
| NM_001142276 | APLP2   | 614  | 698  | 2.62518742242 |
| NM_001142276 | APLP2   | 834  | 978  | 4.84757984375 |
| NM_001142276 | APLP2   | 1253 | 1324 | 3.84757984375 |
| NM_001142276 | APLP2   | 1953 | 2115 | 5.16950793864 |
| NM_001142276 | APLP2   | 1694 | 1795 | 2.84757984375 |
| NM_001605    | AARS    | 393  | 430  | 6.08156643348 |
| NM_014963    | SBN02   | 3146 | 3167 | 8.38091089799 |
| NM_198216    | SNRPB   | 342  | 385  | 2.08212677554 |
| NM_198216    | SNRPB   | 274  | 338  | 2.16224838475 |
| NM_032832    | LRP11   | 1264 | 1295 | 8.08531623909 |
| NM_014713    | LAPTM4A | 1270 | 1314 | 4.77013580692 |
| NM_014713    | LAPTM4A | 1081 | 1117 | 5.94407840853 |
| NM_014713    | LAPTM4A | 716  | 783  | 6.77415340709 |
| NM_014713    | LAPTM4A | 825  | 932  | 6.86161624834 |
| NM_014713    | LAPTM4A | 1028 | 1074 | 5.77415317117 |
| NM_014713    | LAPTM4A | 641  | 680  | 5.09607477093 |
| NM_014713    | LAPTM4A | 955  | 1019 | 5.94407840853 |
| NM_017994    | C7orf42 | 767  | 816  | 8.35994715709 |
| NM_203379    | ACSL5   | 1557 | 1579 | 3.01998426557 |
| NM_183416    | KIF1B   | 5596 | 5623 | 7.38996980431 |
| NM_002117    | HLA-C   | 396  | 460  | 4.98555321566 |
| NM_002117    | HLA-C   | 986  | 1034 | 4.40059071494 |
| NM_002117    | HLA-C   | 623  | 688  | 6.98957081584 |
| NM_002117    | HLA-C   | 489  | 545  | 5.40460831511 |
| NM_002117    | HLA-C   | 1056 | 1083 | 3.4046080792  |
| NM_002117    | HLA-C   | 312  | 386  | 5.40460831511 |
| NM_002117    | HLA-C   | 863  | 897  | 4.98957081561 |
| NM_002117    | HLA-C   | 203  | 244  | 4.4044345648  |

|              |             |      |      |                    |
|--------------|-------------|------|------|--------------------|
| NM_002117    | HLA-C       | 736  | 847  | 6.40460831511      |
| NM_002116    | HLA-A       | 642  | 711  | 7.87802184374      |
| NM_002116    | HLA-A       | 496  | 578  | 7.58851522654      |
| NM_002116    | HLA-A       | 1338 | 1388 | 7.22594514716      |
| NM_002116    | HLA-A       | 439  | 495  | 5.4185902251       |
| NM_002116    | HLA-A       | 83   | 137  | 4.99953512565      |
| NM_002116    | HLA-A       | 1126 | 1164 | 4.91941351644      |
| NM_002116    | HLA-A       | 1419 | 1476 | 5.4185902251       |
| NM_002116    | HLA-A       | 999  | 1105 | 6.74051831999      |
| NM_002116    | HLA-A       | 142  | 174  | 4.33445101572      |
| NM_002116    | HLA-A       | 221  | 263  | 4.41841647478      |
| NM_002116    | HLA-A       | 1169 | 1311 | 7.50605306635      |
| NM_002116    | HLA-A       | 755  | 925  | 7.74051831999      |
| NM_002116    | HLA-A       | 285  | 417  | 8.58851522654      |
| NM_002800    | PSMB9       | 144  | 165  | 11.2423443544      |
| NM_002808    | PSMD2       | 1967 | 2001 | 5.23304546762      |
| NM_147150    | PALM2-AKAP2 |      | 2291 | 2312 8.47887860498 |
| NM_178454    | DRAM2       | 616  | 670  | 5.26855113672      |
| NM_005469    | ACOT8       | 543  | 562  | 8.74144398284      |
| NM_014339    | IL17RA      | 474  | 532  | 12.2139174384      |
| NM_014339    | IL17RA      | 665  | 767  | 11.4866841256      |
| NM_001017974 | P4HA2       | 462  | 528  | 5.98713627009      |
| NM_001017974 | P4HA2       | 577  | 612  | 3.98311890584      |
| NM_001017974 | P4HA2       | 634  | 668  | 5.57209899919      |
| NM_015686    | FAM155B     | 1547 | 1566 | 10.5662263453      |
| NM_001098800 | MAGED4      | 2055 | 2097 | 4.48328075851      |
| NM_001098800 | MAGED4      | 1683 | 1816 | 4.48328075874      |
| NM_001098805 | ANKRD20A4   |      | 8    | 28 13.9524263241   |
| NM_012482    | ZNF281      | 192  | 233  | 6.26356403619      |
| NM_001114397 | DHX36       | 216  | 238  | 4.27767257457      |
| NM_001104586 | ALS2CR8     | 4220 | 4242 | 9.29723368897      |
| NM_030758    | OSBP2       | 79   | 97   | 10.0154140674      |
| NM_030755    | TMX1        | 666  | 733  | 6.41019381265      |
| NM_030755    | TMX1        | 363  | 424  | 6.51710901657      |
| NM_030755    | TMX1        | 600  | 626  | 5.03168218185      |
| NM_030755    | TMX1        | 548  | 590  | 5.29069899506      |
| NM_021639    | GPBP1L1     | 1503 | 1523 | 3.17591481806      |
| NM_001198682 | NME2        | 516  | 592  | 3.4303075737       |
| NM_001198682 | NME2        | 343  | 404  | 0.845171322665     |
| NM_001172832 | ZNF300      | 2855 | 2877 | 9.44066903659      |
| NM_000239    | LYZ         | 1382 | 1447 | 1.23383581525      |
| NM_000239    | LYZ         | 55   | 225  | 4.74163069137      |
| NM_000239    | LYZ         | 225  | 508  | 5.70956948214      |
| NM_000239    | LYZ         | 1254 | 1379 | 2.55576414606      |
| NM_000239    | LYZ         | 790  | 882  | -1.76616394883     |
| NM_000239    | LYZ         | 515  | 577  | 1.04119097323      |
| NM_000235    | LIPA        | 972  | 997  | 3.427095239        |
| NM_000235    | LIPA        | 897  | 943  | 5.09619021805      |
| NM_000235    | LIPA        | 613  | 661  | 6.68115944983      |
| NM_000235    | LIPA        | 1290 | 1343 | 6.31858936289      |

|              |           |      |      |               |               |
|--------------|-----------|------|------|---------------|---------------|
| NM_000235    | LIPA      | 1017 | 1099 | 6.0961969491  |               |
| NM_000236    | LIPC      | 312  | 370  | 9.1746533652  |               |
| NM_000236    | LIPC      | 473  | 535  | 7.58567326431 |               |
| NM_000236    | LIPC      | 803  | 859  | 6.58567326431 |               |
| NM_001080452 | GPR108    | 1571 | 1622 | 8.13150097422 |               |
| NM_139283    | PPTC7     | 305  | 342  | 8.80736945879 |               |
| NM_006392    | NOP56     | 1336 | 1397 | 5.04587334926 |               |
| NM_006395    | ATG7      | 1228 | 1249 | 8.07821707006 |               |
| NM_005852    | CHD3      | 3933 | 3976 | 8.46722329953 |               |
| NM_005852    | CHD3      | 6473 | 6494 | 8.46705628026 |               |
| NM_005857    | ZMPSTE24  |      | 513  | 566           | 9.1933133154  |
| NM_005857    | ZMPSTE24  |      | 1545 | 1587          | 8.90380646228 |
| NM_005857    | ZMPSTE24  |      | 443  | 480           | 7.72986409659 |
| NM_005857    | ZMPSTE24  |      | 954  | 1019          | 8.31884396156 |
| NM_005857    | ZMPSTE24  |      | 817  | 858           | 6.73388168921 |
| NM_005859    | PURA      | 4464 | 4483 | 6.36547054778 |               |
| NM_018622    | PARL      | 103  | 131  | 8.36338322969 |               |
| NM_031243    | HNRNPA2B1 |      | 326  | 387           | 3.32873338153 |
| NM_031243    | HNRNPA2B1 |      | 640  | 687           | 3.1070906484  |
| NM_031243    | HNRNPA2B1 |      | 2929 | 2948          | 0.86912801258 |
| NM_031243    | HNRNPA2B1 |      | 1718 | 1761          | 1.4542640277  |
| NM_031243    | HNRNPA2B1 |      | 853  | 947           | 2.4542642634  |
| NM_018335    | ZNF839    | 1784 | 1813 | 7.6907037874  |               |
| NM_001195044 | YAP1      | 2520 | 2548 | 3.80621185241 |               |
| NM_001083538 | POTEE     | 2456 | 2517 | 8.45279923499 |               |
| NM_147187    | TNFRSF10B |      | 1195 | 1266          | 6.2275142407  |
| NM_001178063 | C2        | 318  | 363  | 4.88921976774 |               |
| NM_001178063 | C2        | 454  | 527  | 5.05914476918 |               |
| NM_001178063 | C2        | 1030 | 1064 | 3.39004305907 |               |
| NM_001178063 | C2        | 1530 | 1573 | 2.88520216756 |               |
| NM_001178063 | C2        | 751  | 826  | 3.47016466828 |               |
| NM_001178063 | C2        | 222  | 275  | 4.88921303668 |               |
| NM_001178063 | C2        | 632  | 731  | 6.58965948588 |               |
| NM_001178063 | C2        | 1833 | 1937 | 3.4741755374  |               |
| NM_004433    | ELF3      | 777  | 823  | 6.80839238784 |               |
| NM_004431    | EPHA2     | 2789 | 2840 | 8.43028855518 |               |
| NM_004431    | EPHA2     | 2342 | 2383 | 6.53879443129 |               |
| NM_004431    | EPHA2     | 706  | 746  | 6.53879443129 |               |
| NM_004431    | EPHA2     | 2526 | 2591 | 8.94486173556 |               |
| NM_004431    | EPHA2     | 1758 | 1803 | 8.6189160405  |               |
| NM_004431    | EPHA2     | 356  | 396  | 7.6189160405  |               |
| NM_004431    | EPHA2     | 1257 | 1314 | 6.62293363312 |               |
| NM_004431    | EPHA2     | 522  | 557  | 7.12375693201 |               |
| NM_004431    | EPHA2     | 440  | 481  | 6.53879443129 |               |
| NM_201442    | C1S       | 1407 | 1474 | 10.095298028  |               |
| NM_201442    | C1S       | 1308 | 1371 | 9.35432156475 |               |
| NM_201442    | C1S       | 1539 | 1614 | 10.7733766567 |               |
| NM_006948    | HSPA13    | 1085 | 1135 | 7.23545719603 |               |
| NM_006948    | HSPA13    | 731  | 768  | 6.691886368   |               |
| NM_006946    | SPTBN2    | 1986 | 2007 | 10.3811823449 |               |



|              |           |       |       |                    |
|--------------|-----------|-------|-------|--------------------|
| NM_001620    | AHNAK     | 16086 | 16105 | 7.26782483898      |
| NM_020759    | STARD9    | 977   | 997   | 10.0723982627      |
| NM_032853    | MUM1      | 2310  | 2332  | 7.49905444531      |
| NM_032853    | MUM1      | 2     | 44    | 8.90512174958      |
| NM_025181    | SLC35F5   | 205   | 240   | 5.72703978852      |
| NM_000393    | COL5A2    | 3101  | 3122  | 12.1769233404      |
| NM_000392    | ABCC2     | 1493  | 1539  | 5.49961760227      |
| NM_000391    | TPP1      | 1338  | 1381  | 7.75816715112      |
| NM_000391    | TPP1      | 1821  | 1861  | 5.43222818711      |
| NM_000391    | TPP1      | 1016  | 1055  | 7.02103453769      |
| NM_000391    | TPP1      | 686   | 727   | 7.75817388217      |
| NM_000391    | TPP1      | 600   | 657   | 7.75817388195      |
| NM_000391    | TPP1      | 406   | 443   | 6.43624578706      |
| NM_000391    | TPP1      | 287   | 348   | 7.43624578706      |
| NM_203355    | CTAGE5    | 730   | 775   | 3.68787464874      |
| NM_203355    | CTAGE5    | 1132  | 1180  | 3.69188551786      |
| NM_003840    | TNFRSF10D |       | 506   | 591 6.74357023238  |
| NM_001134368 | SLC6A6    | 463   | 510   | 10.4427276735      |
| NM_018845    | SLC50A1   | 163   | 234   | 11.4737950584      |
| NM_001130996 | HMGCR     | 1242  | 1285  | 7.84248970929      |
| NM_001130996 | HMGCR     | 1751  | 1835  | 8.3119749926       |
| NM_001130996 | HMGCR     | 780   | 824   | 4.05791078177      |
| NM_001130996 | HMGCR     | 1437  | 1507  | 6.14204975523      |
| NM_001130996 | HMGCR     | 2198  | 2228  | 6.14204975523      |
| NM_001130996 | HMGCR     | 1120  | 1181  | 7.60148160224      |
| NM_001130996 | HMGCR     | 1591  | 1631  | 6.94940491321      |
| NM_001130996 | HMGCR     | 1294  | 1337  | 5.1420432601       |
| NM_001130996 | HMGCR     | 2516  | 2551  | 5.72701248433      |
| NM_001130996 | HMGCR     | 660   | 700   | 6.72701249187      |
| NM_001130996 | HMGCR     | 604   | 646   | 5.1420432601       |
| NM_001130996 | HMGCR     | 2056  | 2080  | 6.05791078177      |
| NM_001130996 | HMGCR     | 1007  | 1113  | 7.14204999115      |
| NM_001130996 | HMGCR     | 925   | 990   | 5.14187624084      |
| NM_153369    | KIAA1919  |       | 1212  | 1246 8.71319866822 |
| NM_003664    | AP3B1     | 2351  | 2371  | 7.68758910401      |
| NM_018430    | TSNAXIP1  |       | 1705  | 1725 11.3445120415 |
| NM_003660    | PPFIA3    | 870   | 888   | 8.25396223257      |
| NM_002829    | PTPN3     | 2544  | 2564  | 7.34714613944      |
| NM_002823    | PTMA      | 126   | 274   | 4.61393427299      |
| NM_002390    | ADAM11    | 800   | 818   | 13.1895153766      |
| NM_001190791 | ZNF317    | 2793  | 2812  | 8.26439043228      |
| NM_005629    | SLC6A8    | 67    | 121   | 6.82775952404      |
| NM_032211    | LOXL4     | 2100  | 2198  | 9.59372015074      |
| NM_032211    | LOXL4     | 1155  | 1226  | 7.18765957752      |
| NM_006010    | MANF      | 463   | 508   | 4.6182052032       |
| NM_001017956 | OS9       | 295   | 344   | 4.04515952554      |
| NM_001017956 | OS9       | 1097  | 1151  | 5.46020351995      |
| NM_001017956 | OS9       | 520   | 588   | 6.26755867793      |
| NM_001017956 | OS9       | 1701  | 1735  | 3.37606454649      |
| NM_001017956 | OS9       | 370   | 407   | 3.46003000555      |

|              |         |      |      |                |
|--------------|---------|------|------|----------------|
| NM_001017956 | OS9     | 636  | 675  | 5.04515952554  |
| NM_001017956 | OS9     | 1460 | 1540 | 5.26755867793  |
| NM_001017956 | OS9     | 1811 | 1884 | 5.63012875731  |
| NM_001017956 | OS9     | 2149 | 2203 | 4.4561861557   |
| NM_001017956 | OS9     | 2254 | 2305 | 5.04516625637  |
| NM_001017956 | OS9     | 2066 | 2108 | 4.46019702482  |
| NM_001017956 | OS9     | 1977 | 2013 | 4.46019702482  |
| NM_001017956 | OS9     | 781  | 913  | 6.98376571193  |
| NM_001017956 | OS9     | 1025 | 1063 | 3.96102704721  |
| NM_001017956 | OS9     | 1565 | 1701 | 6.04516625659  |
| NM_001017956 | OS9     | 1361 | 1445 | 3.46020351995  |
| NM_001017956 | OS9     | 1152 | 1207 | 2.46020374832  |
| NM_001163817 | DHCR7   | 1204 | 1234 | 6.38954045777  |
| NM_001163817 | DHCR7   | 731  | 796  | 6.8045846881   |
| NM_001163817 | DHCR7   | 1608 | 1647 | 3.72044547872  |
| NM_001163817 | DHCR7   | 1312 | 1368 | 6.12249518281  |
| NM_001163817 | DHCR7   | 452  | 531  | 7.50502440624  |
| NM_001163817 | DHCR7   | 648  | 728  | 5.80458445218  |
| NM_001163817 | DHCR7   | 307  | 385  | 6.80441093778  |
| NM_001163817 | DHCR7   | 132  | 168  | 5.38552958865  |
| NM_001163817 | DHCR7   | 910  | 1018 | 7.8045846881   |
| NM_001163817 | DHCR7   | 1051 | 1203 | 8.71147528371  |
| NM_001163817 | DHCR7   | 548  | 603  | 5.30540797944  |
| NM_001163817 | DHCR7   | 1426 | 1510 | 7.12651278299  |
| NM_001163817 | DHCR7   | 1825 | 1875 | 6.12651278298  |
| NM_152564    | VPS13B  | 8019 | 8043 | 9.90231401044  |
| NM_001143947 | UNC93A  | 995  | 1036 | 6.53915743623  |
| NM_001143947 | UNC93A  | 811  | 844  | 7.20825241528  |
| NM_001143947 | UNC93A  | 1085 | 1139 | 7.62328991456  |
| NM_001143947 | UNC93A  | 1037 | 1079 | 6.61927904544  |
| NM_001143947 | UNC93A  | 885  | 976  | 7.9452247405   |
| NM_001165416 | LDHA    | 880  | 934  | -1.31340012497 |
| NM_001142403 | CD164   | 467  | 509  | 7.07496917833  |
| NM_001142403 | CD164   | 615  | 639  | 7.07496894242  |
| NM_173344    | ST3GAL1 | 3730 | 3750 | 6.17490077171  |
| NM_001013660 | FRRS1   | 1386 | 1423 | 7.52865833806  |
| NM_001013660 | FRRS1   | 838  | 867  | 7.44451936459  |
| NM_001013660 | FRRS1   | 1470 | 1516 | 7.52848482366  |
| NM_001013660 | FRRS1   | 1919 | 1982 | 6.93967847308  |
| NM_001013660 | FRRS1   | 2140 | 2192 | 6.94352232294  |
| NM_001013660 | FRRS1   | 1836 | 1884 | 6.85955686387  |
| NM_033023    | PDGFA   | 376  | 413  | 10.3049995222  |
| NM_016297    | PCY0X1  | 980  | 1019 | 4.96263754041  |
| NM_016297    | PCY0X1  | 359  | 394  | 3.4577966489   |
| NM_016297    | PCY0X1  | 1199 | 1232 | 4.96263754041  |
| NM_016297    | PCY0X1  | 217  | 273  | 4.4577966489   |
| NM_016297    | PCY0X1  | 525  | 568  | 5.46181424885  |
| NM_178314    | RILPL1  | 1292 | 1311 | 7.39996822241  |
| NM_004373    | COX6A1  | 30   | 87   | 5.53180856439  |
| NM_004373    | COX6A1  | 101  | 222  | 5.53180856439  |

|              |          |      |      |                    |
|--------------|----------|------|------|--------------------|
| NM_198391    | FLRT3    | 2208 | 2258 | 10.3286740543      |
| NM_198391    | FLRT3    | 966  | 1009 | 11.4661843091      |
| NM_198391    | FLRT3    | 1560 | 1601 | 9.00675269045      |
| NM_198391    | FLRT3    | 124  | 187  | 9.59171495526      |
| NM_198391    | FLRT3    | 2150 | 2207 | 9.59171519118      |
| NM_198391    | FLRT3    | 1472 | 1511 | 9.59154144086      |
| NM_198391    | FLRT3    | 1171 | 1238 | 11.1766776917      |
| NM_198391    | FLRT3    | 1520 | 1551 | 10.0027350903      |
| NM_198391    | FLRT3    | 598  | 629  | 10.0027350903      |
| NM_198391    | FLRT3    | 1972 | 2019 | 10.0067524545      |
| NM_198391    | FLRT3    | 1745 | 1822 | 11.1766776919      |
| NM_144564    | SLC39A3  | 360  | 400  | 10.4661465609      |
| NM_000253    | MTTP     | 2867 | 2907 | 6.42389782904      |
| NM_000253    | MTTP     | 1852 | 1885 | 5.68693223487      |
| NM_000253    | MTTP     | 731  | 777  | 5.69094310399      |
| NM_000253    | MTTP     | 1323 | 1383 | 5.10196973415      |
| NM_148923    | CYB5A    | 102  | 144  | 3.75761652987      |
| NM_207380    | C15orf52 |      | 5130 | 5168 14.4485002728 |
| NM_207380    | C15orf52 |      | 5173 | 5207 10.6639213453 |
| NM_001080472 | FITM2    | 66   | 118  | 6.36990819327      |
| NM_000876    | IGF2R    | 4453 | 4503 | 6.6740481023       |
| NM_000876    | IGF2R    | 2575 | 2622 | 6.21461648388      |
| NM_000876    | IGF2R    | 5929 | 5980 | 3.21461624796      |
| NM_000876    | IGF2R    | 3291 | 3337 | 4.7995789846       |
| NM_000876    | IGF2R    | 2096 | 2157 | 6.38454124941      |
| NM_000876    | IGF2R    | 2917 | 2957 | 5.79957897705      |
| NM_000876    | IGF2R    | 4882 | 4907 | 4.71543977522      |
| NM_000876    | IGF2R    | 2337 | 2379 | 6.02197140572      |
| NM_000876    | IGF2R    | 4945 | 5004 | 6.38454148532      |
| NM_000876    | IGF2R    | 6149 | 6200 | 7.46254399733      |
| NM_000876    | IGF2R    | 3049 | 3109 | 4.79556138443      |
| NM_000876    | IGF2R    | 3454 | 3490 | 6.21461624796      |
| NM_000876    | IGF2R    | 1834 | 1875 | 4.79940523429      |
| NM_000876    | IGF2R    | 7469 | 7534 | 4.79556138443      |
| NM_000876    | IGF2R    | 3894 | 3952 | 5.53653784772      |
| NM_000876    | IGF2R    | 2859 | 2900 | 5.71543977522      |
| NM_000876    | IGF2R    | 841  | 930  | 6.02197140594      |
| NM_000876    | IGF2R    | 7209 | 7270 | 6.38454124941      |
| NM_000876    | IGF2R    | 1204 | 1259 | 6.02196467489      |
| NM_000876    | IGF2R    | 5260 | 5292 | 4.79957874869      |
| NM_000876    | IGF2R    | 2250 | 2281 | 5.45240536939      |
| NM_000876    | IGF2R    | 4223 | 4295 | 6.02197140594      |
| NM_000876    | IGF2R    | 5298 | 5347 | 4.71543977522      |
| NM_000876    | IGF2R    | 4610 | 4640 | 4.79556138443      |
| NM_000876    | IGF2R    | 3749 | 3878 | 7.53654457877      |
| NM_000876    | IGF2R    | 1112 | 1147 | 5.21059888371      |
| NM_000876    | IGF2R    | 5731 | 5805 | 5.21461648366      |
| NM_000876    | IGF2R    | 1633 | 1687 | 6.67404810252      |
| NM_000876    | IGF2R    | 4834 | 4877 | 5.21059888371      |
| NM_000876    | IGF2R    | 6812 | 6845 | 4.79556138443      |

|              |         |      |      |                 |
|--------------|---------|------|------|-----------------|
| NM_000876    | IGF2R   | 3009 | 3035 | 5.1304772745    |
| NM_000876    | IGF2R   | 1340 | 1384 | 3.21059888371   |
| NM_000876    | IGF2R   | 6013 | 6089 | 6.38454148532   |
| NM_000876    | IGF2R   | 7355 | 7442 | 4.21461648388   |
| NM_000876    | IGF2R   | 2191 | 2229 | 6.38454148532   |
| NM_000876    | IGF2R   | 691  | 797  | 7.30207932513   |
| NM_000876    | IGF2R   | 6928 | 7000 | 5.53654457877   |
| NM_000876    | IGF2R   | 5619 | 5724 | 7.02197140594   |
| NM_000876    | IGF2R   | 3576 | 3657 | 4.21461648388   |
| NM_000876    | IGF2R   | 3340 | 3443 | 6.67404810252   |
| NM_000876    | IGF2R   | 1960 | 2049 | 5.53654457855   |
| NM_000876    | IGF2R   | 5433 | 5524 | 5.53654457877   |
| NM_000876    | IGF2R   | 1455 | 1537 | 5.1304772745    |
| NM_000876    | IGF2R   | 342  | 453  | 6.21461648388   |
| NM_000876    | IGF2R   | 6380 | 6457 | 5.7995789846    |
| NM_000876    | IGF2R   | 586  | 630  | 5.21444273356   |
| NM_000875    | IGF1R   | 3773 | 3793 | 7.35134775772   |
| NM_024640    | YRDC    | 615  | 636  | 7.05806787618   |
| NM_025231    | ZSCAN16 | 431  | 452  | 6.71786072816   |
| NM_178557    | NAT8L   | 4084 | 4108 | 12.927150608    |
| NM_014270    | SLC7A9  | 694  | 749  | 12.3889061609   |
| NM_014275    | MGAT4B  | 1952 | 2042 | 5.19788574072   |
| NM_025232    | REEP4   | 1176 | 1218 | 11.414818813    |
| NM_015274    | MAN2B2  | 2918 | 2958 | 11.9282556658   |
| NM_178126    | FAM134C | 720  | 774  | 8.42252998719   |
| NM_001005291 | SREBF1  | 3306 | 3361 | 8.94565859416   |
| NM_001005291 | SREBF1  | 2214 | 2296 | 9.48640072584   |
| NM_001005291 | SREBF1  | 1733 | 1808 | 8.65632572728   |
| NM_001005291 | SREBF1  | 2665 | 2741 | 7.8083285848    |
| NM_001005291 | SREBF1  | 1312 | 1345 | 6.98722401717   |
| NM_001005291 | SREBF1  | 2116 | 2205 | 5.48640048992   |
| NM_001005291 | SREBF1  | 2011 | 2069 | 8.07118947624   |
| NM_001005291 | SREBF1  | 1466 | 1550 | 8.29375564789   |
| NM_004415    | DSP     | 7268 | 7310 | 0.771014225574  |
| NM_004415    | DSP     | 3604 | 3673 | 0.851135834785  |
| NM_001397    | ECE1    | 1233 | 1286 | 7.19138860134   |
| NM_001397    | ECE1    | 1906 | 1937 | 5.86946050645   |
| NM_001397    | ECE1    | 984  | 1018 | 5.94958211566   |
| NM_001397    | ECE1    | 616  | 656  | 6.45442300717   |
| NM_001397    | ECE1    | 271  | 322  | 4.95359298478   |
| NM_001397    | ECE1    | 2386 | 2433 | 5.86946050645   |
| NM_001398    | ECH1    | 313  | 367  | 5.89431464208   |
| NM_001428    | EN01    | 1182 | 1283 | 0.0572690427642 |
| NM_001428    | EN01    | 1654 | 1695 | -2.48630178526  |
| NM_001428    | EN01    | 1698 | 1750 | -2.40233632619  |
| NM_022731    | NUCKS1  | 2655 | 2675 | 3.22869431981   |
| NM_022731    | NUCKS1  | 409  | 482  | 2.8976222796    |
| NM_022735    | ACBD3   | 1171 | 1190 | 6.35272215241   |
| NM_018976    | SLC38A2 | 1250 | 1292 | 5.47471644331   |
| NM_018976    | SLC38A2 | 467  | 498  | 3.96013653943   |

|              |              |      |      |                   |
|--------------|--------------|------|------|-------------------|
| NM_018976    | SLC38A2      | 789  | 829  | 2.14877074825     |
| NM_018976    | SLC38A2      | 1617 | 1650 | 4.32271334232     |
| NM_018976    | SLC38A2      | 1510 | 1608 | 5.85322806656     |
| NM_018976    | SLC38A2      | 675  | 722  | 4.32271334987     |
| NM_018976    | SLC38A2      | 96   | 133  | 2.06864913904     |
| NM_018976    | SLC38A2      | 271  | 350  | 3.73775084914     |
| NM_018976    | SLC38A2      | 1103 | 1206 | 6.19718246778     |
| NM_018976    | SLC38A2      | 1299 | 1423 | 7.03543139778     |
| NM_018976    | SLC38A2      | 977  | 1099 | 6.36224171405     |
| NM_018976    | SLC38A2      | 840  | 940  | 3.47471644331     |
| NM_018976    | SLC38A2      | 1817 | 1952 | 5.61221996706     |
| NM_020823    | TMEM181      | 1725 | 1773 | 5.88522314384     |
| NM_001643    | APOA2        | 382  | 443  | 2.11410077683     |
| NM_001643    | APOA2        | 0    | 369  | 6.30392533571     |
| NM_001199781 | POC1B-GALNT4 |      | 206  | 225 9.44858719148 |
| NM_022551    | RPS18        | 203  | 258  | 0.701341464034    |
| NM_022551    | RPS18        | 274  | 327  | 0.701341463812    |
| NM_144970    | CXorf38      | 3725 | 3765 | 8.83438708261     |
| NM_001164280 | SLC37A4      | 904  | 939  | 8.66043675164     |
| NM_006260    | DNAJC3       | 1040 | 1102 | 7.23631650091     |
| NM_001205206 | SLC19A1      | 1117 | 1155 | 7.23330085122     |
| NM_001205206 | SLC19A1      | 1394 | 1431 | 7.23330085122     |
| NM_001024401 | SBK1         | 4055 | 4124 | 12.6787860963     |
| NM_001100412 | DR0SHA       | 5197 | 5217 | 6.17607605538     |
| NM_014044    | UNC50        | 570  | 627  | 7.24301145058     |
| NM_014044    | UNC50        | 280  | 300  | 5.57390974048     |
| NM_014045    | LRP10        | 1764 | 1860 | 9.81299577033     |
| NM_014045    | LRP10        | 2603 | 2679 | 8.22803326961     |
| NM_014045    | LRP10        | 1298 | 1348 | 7.54995463344     |
| NM_014045    | LRP10        | 1566 | 1629 | 7.81299577033     |
| NM_014045    | LRP10        | 470  | 552  | 7.54996112858     |
| NM_001035254 | FAM102A      | 1149 | 1172 | 7.67294304436     |
| NM_003139    | SRPR         | 400  | 464  | 5.05229705875     |
| NM_003139    | SRPR         | 1184 | 1256 | 5.37422515364     |
| NM_004800    | TM9SF2       | 1653 | 1700 | 7.6582889849      |
| NM_004800    | TM9SF2       | 1892 | 1956 | 5.31111536969     |
| NM_004800    | TM9SF2       | 2047 | 2123 | 6.24325148562     |
| NM_004800    | TM9SF2       | 380  | 447  | 7.32125399763     |
| NM_004800    | TM9SF2       | 575  | 609  | 5.6582889849      |
| NM_004800    | TM9SF2       | 1750 | 1781 | 5.06930888401     |
| NM_004800    | TM9SF2       | 1546 | 1606 | 6.77376620232     |
| NM_004800    | TM9SF2       | 2200 | 2230 | 4.06930888401     |
| NM_004800    | TM9SF2       | 1479 | 1527 | 5.07332648396     |
| NM_004800    | TM9SF2       | 518  | 553  | 5.06930888401     |
| NM_004800    | TM9SF2       | 877  | 960  | 8.07332648418     |
| NM_004800    | TM9SF2       | 125  | 199  | 5.88050765592     |
| NM_004800    | TM9SF2       | 1325 | 1476 | 8.71718267396     |
| NM_004800    | TM9SF2       | 960  | 1118 | 8.07332648418     |
| NM_004800    | TM9SF2       | 620  | 786  | 8.02752279457     |
| NM_004800    | TM9SF2       | 1145 | 1300 | 8.28277984981     |

|              |          |      |      |                  |
|--------------|----------|------|------|------------------|
| NM_004800    | TM9SF2   | 229  | 301  | 4.65427138473    |
| NM_003641    | IFITM1   | 358  | 403  | 8.90413533911    |
| NM_003641    | IFITM1   | 420  | 459  | 6.90396158901    |
| NM_014992    | DAAM1    | 1373 | 1481 | 8.94939369014    |
| NM_032096    | PCDHGB2  | 2    | 22   | 12.7653389534    |
| NM_015649    | IRF2BP1  | 266  | 286  | 9.38500831402    |
| NM_001040716 | PC       | 1018 | 1036 | 8.29577245186    |
| NM_001040716 | PC       | 3017 | 3037 | 8.21565084265    |
| NM_018013    | SOBP     | 205  | 242  | 7.22366747588    |
| NM_002743    | PRKCSH   | 276  | 355  | 6.90040859596    |
| NM_002743    | PRKCSH   | 1987 | 2050 | 6.06390732824    |
| NM_002743    | PRKCSH   | 1094 | 1151 | 6.06390732824    |
| NM_002743    | PRKCSH   | 71   | 168  | 6.34401524744    |
| NM_002743    | PRKCSH   | 397  | 499  | 7.50447991963    |
| NM_002743    | PRKCSH   | 1373 | 1436 | 6.25655240619    |
| NM_002743    | PRKCSH   | 1312 | 1354 | 3.84150817585    |
| NM_002743    | PRKCSH   | 1519 | 1559 | 5.05988972807    |
| NM_002743    | PRKCSH   | 1271 | 1305 | 3.25655217027    |
| NM_002743    | PRKCSH   | 999  | 1048 | 3.1724131968     |
| NM_002743    | PRKCSH   | 1773 | 1860 | 5.25655240619    |
| NM_002743    | PRKCSH   | 762  | 998  | 8.40629952569    |
| NM_002743    | PRKCSH   | 544  | 750  | 8.13919545555    |
| NM_002743    | PRKCSH   | 1632 | 1747 | 5.95699212433    |
| NM_001130046 | CCL20    | 658  | 695  | 5.21022661185    |
| NM_001130046 | CCL20    | 8    | 404  | 10.669658238     |
| NM_001005    | RPS3     | 129  | 210  | 1.40659434766    |
| NM_001005    | RPS3     | 226  | 309  | 0.947162493105   |
| NM_001006    | RPS3A    | 255  | 300  | 0.740065013171   |
| NM_001007    | RPS4X    | 571  | 655  | 2.49307914999    |
| NM_001009999 | KDM1A    | 125  | 143  | 4.64344728334    |
| NM_000578    | SLC11A1  | 3098 | 3117 | 11.3845327954    |
| NM_000973    | RPL8     | 765  | 826  | 3.03977914569    |
| NM_000973    | RPL8     | 640  | 711  | 3.03960563129    |
| NM_000973    | RPL8     | 463  | 524  | 2.73324775089    |
| NM_138571    | HINT3    | 24   | 43   | 6.08474765841    |
| NM_138578    | BCL2L1   | 168  | 217  | 3.42338586637    |
| NM_000979    | RPL18    | 506  | 544  | 4.25423056606    |
| NM_000979    | RPL18    | 628  | 667  | 4.74938967455    |
| NM_017896    | C20orf11 |      | 2    | 22 4.01469850388 |
| NM_001893    | CSNK1D   | 1123 | 1213 | 7.21341213205    |
| NM_004217    | AURKB    | 1035 | 1077 | 7.3826845438     |
| NM_004355    | CD74     | 677  | 741  | 7.81523524139    |
| NM_004355    | CD74     | 588  | 625  | 6.46806162617    |
| NM_004355    | CD74     | 804  | 869  | 6.55220083556    |
| NM_001195532 | SPTAN1   | 7529 | 7611 | 6.12347071106    |
| NM_001195532 | SPTAN1   | 3694 | 3738 | 4.90090453941    |
| NM_001195532 | SPTAN1   | 606  | 703  | 6.31611578901    |
| NM_001195532 | SPTAN1   | 1387 | 1431 | 4.23197657962    |
| NM_001195532 | SPTAN1   | 2884 | 2932 | 4.90090453941    |
| NM_001195532 | SPTAN1   | 2472 | 2554 | 5.31611578901    |

|              |          |      |      |                    |
|--------------|----------|------|------|--------------------|
| NM_001195532 | SPTAN1   | 5123 | 5175 | 5.63787013358      |
| NM_001195532 | SPTAN1   | 6013 | 6094 | 6.316115789        |
| NM_001195532 | SPTAN1   | 3145 | 3246 | 5.63804364798      |
| NM_001195532 | SPTAN1   | 4448 | 4527 | 6.77554067659      |
| NM_000271    | NPC1     | 984  | 1029 | 5.96910867667      |
| NM_000271    | NPC1     | 2241 | 2277 | 7.77646359873      |
| NM_000271    | NPC1     | 2336 | 2373 | 6.96910867667      |
| NM_000271    | NPC1     | 1317 | 1361 | 6.6341927866       |
| NM_000271    | NPC1     | 3677 | 3777 | 7.05324788606      |
| NM_030791    | SGPP1    | 1152 | 1187 | 9.92880794454      |
| NM_030796    | VOPP1    | 307  | 340  | 9.41696396672      |
| NM_001128325 | SPON2    | 880  | 927  | 7.70936240664      |
| NM_001128325 | SPON2    | 1080 | 1163 | 8.7133800068       |
| NM_001128325 | SPON2    | 735  | 811  | 8.71338000681      |
| NM_001128325 | SPON2    | 517  | 628  | 9.58784912473      |
| NM_032815    | NFATC2IP |      | 73   | 106 7.97222619092  |
| NM_172230    | SYVN1    | 665  | 707  | 10.1233592799      |
| NM_172230    | SYVN1    | 975  | 1015 | 9.70430418063      |
| NM_172230    | SYVN1    | 438  | 469  | 9.12318552977      |
| NM_001098210 | CTNNB1   | 2322 | 2370 | 4.49051781253      |
| NM_172236    | POFUT1   | 344  | 381  | 8.00100686807      |
| NM_172236    | POFUT1   | 1    | 36   | 7.00100686807      |
| NM_172236    | POFUT1   | 170  | 230  | 6.00485071792      |
| NM_002720    | PPP4C    | 839  | 878  | 5.12181262517      |
| NM_002720    | PPP4C    | 487  | 532  | 4.12582998942      |
| NM_023935    | DDRKG1   | 330  | 378  | 5.43056934902      |
| NM_023935    | DDRKG1   | 379  | 404  | 5.43040232975      |
| NM_023935    | DDRKG1   | 700  | 753  | 4.43040232975      |
| NM_001042371 | PGP      | 18   | 45   | 11.792594839       |
| NM_005984    | SLC25A1  | 948  | 997  | 6.33839101373      |
| NM_019107    | C19orf10 |      | 799  | 853 6.25537697091  |
| NM_019107    | C19orf10 |      | 228  | 262 5.25135937075  |
| NM_019107    | C19orf10 |      | 69   | 116 6.25135937075  |
| NM_001197026 | PLEKHA8  | 6820 | 6839 | 8.73720545609      |
| NM_019027    | RBM47    | 938  | 1005 | 8.39487625867      |
| NM_019026    | TMC01    | 487  | 514  | 2.75834451157      |
| NM_019026    | TMC01    | 342  | 413  | 4.75817749231      |
| NM_019026    | TMC01    | 271  | 311  | 3.34331374312      |
| NM_019026    | TMC01    | 102  | 177  | 4.56570615713      |
| NM_019026    | TMC01    | 537  | 641  | 6.08027933751      |
| NM_152243    | CDC42EP1 |      | 957  | 1015 9.42868244987 |
| NM_018950    | HLA-F    | 1070 | 1116 | 10.2160793456      |
| NM_018950    | HLA-F    | 861  | 921  | 8.80104184637      |
| NM_018950    | HLA-F    | 786  | 830  | 8.21607933809      |
| NM_018950    | HLA-F    | 561  | 590  | 8.80086809605      |
| NM_018955    | UBB      | 825  | 893  | 0.529895130339     |
| NM_018955    | UBB      | 597  | 665  | -0.0550606393287   |
| NM_018955    | UBB      | 336  | 382  | -1.0590782395      |
| NM_016626    | MEX3C    | 890  | 920  | 6.91160667288      |
| NM_144999    | LRR45    | 108  | 136  | 8.5871553226       |

|              |          |      |      |                  |
|--------------|----------|------|------|------------------|
| NM_001409    | MEGF6    | 4963 | 4986 | 11.027905534     |
| NM_001198810 | SLC43A1  | 169  | 253  | 8.47651157207    |
| NM_001198810 | SLC43A1  | 1007 | 1174 | 8.47668532238    |
| NM_001404    | EEF1G    | 546  | 616  | 2.45714155263    |
| NM_001404    | EEF1G    | 310  | 353  | 1.45696780232    |
| NM_007126    | VCP      | 631  | 662  | 4.02267690036    |
| NM_007126    | VCP      | 1165 | 1202 | 6.34477873802    |
| NM_007126    | VCP      | 146  | 221  | 4.60379555123    |
| NM_003801    | GPAA1    | 910  | 961  | 8.23746783849    |
| NM_003801    | GPAA1    | 1229 | 1295 | 11.4075665827    |
| NM_003801    | GPAA1    | 536  | 595  | 11.0449962749    |
| NM_014230    | SRP68    | 59   | 87   | 3.32926519161    |
| NM_000136    | FANCC    | 4503 | 4525 | 9.25664595993    |
| NM_000130    | F5       | 543  | 586  | 5.65062628797    |
| NM_021009    | UBC      | 1793 | 1887 | 4.61393056848    |
| NM_021009    | UBC      | 1038 | 1097 | 2.80657564642    |
| NM_021009    | UBC      | 1361 | 1431 | 3.80657564642    |
| NM_021009    | UBC      | 1485 | 1549 | 3.39153814714    |
| NM_021009    | UBC      | 902  | 955  | 3.39153814692    |
| NM_021009    | UBC      | 1589 | 1659 | 2.80657564642    |
| NM_021009    | UBC      | 1973 | 2115 | 4.61393056848    |
| NM_001205228 | SORT1    | 2363 | 2406 | 5.5607833214     |
| NM_001205228 | SORT1    | 876  | 910  | 5.5609570715     |
| NM_001205228 | SORT1    | 1838 | 1887 | 6.29792266588    |
| NM_001205228 | SORT1    | 1968 | 2005 | 6.29791593483    |
| NM_001205228 | SORT1    | 2016 | 2061 | 4.97197697082    |
| NM_182983    | HPN      | 1893 | 1967 | 7.00591041936    |
| NM_006293    | TYR03    | 1376 | 1457 | 7.39282597927    |
| NM_006293    | TYR03    | 2240 | 2274 | 9.12005929212    |
| NM_003403    | YY1      | 326  | 347  | 5.60586582868    |
| NM_005667    | RNF103   | 1558 | 1587 | 5.73507661782    |
| NM_006471    | MYL12A   | 335  | 395  | 2.91440823109    |
| NM_002569    | FURIN    | 2451 | 2499 | 10.2112461919    |
| NM_002569    | FURIN    | 664  | 700  | 8.12710698252    |
| NM_152744    | SDK1     | 4696 | 4716 | 9.91112626191    |
| NM_032256    | TMEM117  | 226  | 245  | 10.4411140519    |
| NM_152743    | BRAT1    | 420  | 474  | 11.9619067552    |
| NM_001017995 | SH3PXD2B |      | 13   | 42 9.61103665029 |
| NM_001007468 | SMARCB1  | 1065 | 1107 | 3.02558736571    |
| NM_014399    | TSPAN13  | 570  | 610  | 10.1403045447    |
| NM_014399    | TSPAN13  | 620  | 645  | 10.0561653429    |
| NM_014931    | PPP6R1   | 2228 | 2295 | 5.20824869236    |
| NM_017877    | C2orf18  | 16   | 35   | 9.61572895759    |
| NM_001873    | CPE      | 1279 | 1318 | 3.87552884154    |
| NM_001873    | CPE      | 762  | 803  | 3.06416305036    |
| NM_001002836 | ZNF787   | 1545 | 1582 | 11.0390990334    |
| NM_030801    | MAGED4B  | 1797 | 1846 | 5.93307526171    |
| NM_030801    | MAGED4B  | 2085 | 2127 | 5.3482865113     |
| NM_030801    | MAGED4B  | 1713 | 1792 | 5.92923141186    |
| NM_030805    | LMAN2L   | 447  | 507  | 6.82748178524    |



|              |         |      |      |                 |
|--------------|---------|------|------|-----------------|
| NM_004339    | PTTG1IP | 470  | 500  | 2.32304263288   |
| NM_004339    | PTTG1IP | 432  | 467  | 3.31919878302   |
| NM_004339    | PTTG1IP | 514  | 622  | 3.90817888392   |
| NM_004339    | PTTG1IP | 641  | 769  | 4.64514447808   |
| NM_022965    | FGFR3   | 635  | 735  | 5.8139933755    |
| NM_022965    | FGFR3   | 1792 | 1851 | 3.81381962518   |
| NM_022965    | FGFR3   | 1429 | 1510 | 6.13592146284   |
| NM_022965    | FGFR3   | 2436 | 2496 | 5.39895586867   |
| NM_001037283 | EIF3B   | 1987 | 2036 | 3.52106363468   |
| NM_001037283 | EIF3B   | 503  | 596  | 4.8275952654    |
| NM_001037283 | EIF3B   | 893  | 935  | 4.02024034334   |
| NM_001037283 | EIF3B   | 2399 | 2496 | 2.02023361229   |
| NM_020524    | PBXIP1  | 860  | 923  | 8.72470017136   |
| NM_172210    | CSF1    | 803  | 833  | 9.95602796126   |
| NM_006667    | PGRMC1  | 612  | 647  | 7.39898345786   |
| NM_006667    | PGRMC1  | 326  | 394  | 7.39898345786   |
| NM_006667    | PGRMC1  | 503  | 595  | 9.72492915292   |
| NM_138821    | PAM     | 1108 | 1164 | 6.53800720461   |
| NM_006088    | TUBB2C  | 289  | 336  | 6.02186830186   |
| NM_006080    | SEMA3A  | 570  | 600  | 13.2733810062   |
| NM_006080    | SEMA3A  | 897  | 944  | 15.9778383245   |
| NM_006080    | SEMA3A  | 683  | 730  | 15.9778383245   |
| NM_006080    | SEMA3A  | 760  | 822  | 15.5993267013   |
| NM_006080    | SEMA3A  | 1169 | 1204 | 15.0845797781   |
| NM_006080    | SEMA3A  | 1123 | 1166 | 13.2772248561   |
| NM_006080    | SEMA3A  | 1574 | 1694 | 16.0847535284   |
| NM_006080    | SEMA3A  | 1210 | 1250 | 13.7782218977   |
| NM_006080    | SEMA3A  | 1723 | 1782 | 13.2773986064   |
| NM_006082    | TUBA1B  | 356  | 431  | 6.04524764582   |
| NM_006082    | TUBA1B  | 145  | 180  | 4.72314580062   |
| NM_006082    | TUBA1B  | 998  | 1057 | 5.30828205144   |
| NM_006082    | TUBA1B  | 550  | 666  | 6.89324455238   |
| NM_003564    | TAGLN2  | 455  | 521  | 6.83516121713   |
| NM_005216    | DDOST   | 768  | 835  | 7.43434801102   |
| NM_005216    | DDOST   | 653  | 701  | 5.93184767049   |
| NM_005216    | DDOST   | 1447 | 1492 | 6.51681016366   |
| NM_005216    | DDOST   | 269  | 345  | 6.15423985591   |
| NM_005216    | DDOST   | 718  | 766  | 3.3428675696    |
| NM_005216    | DDOST   | 500  | 532  | 4.26274596039   |
| NM_005216    | DDOST   | 1000 | 1048 | 6.66881326466   |
| NM_005216    | DDOST   | 546  | 650  | 7.51681017121   |
| NM_001143760 | EIF5A   | 505  | 557  | 2.03256412441   |
| NM_001007073 | RPL32   | 88   | 119  | 4.7426870456    |
| NM_001037738 | NPM1    | 237  | 285  | 0.350088271173  |
| NM_001037738 | NPM1    | 706  | 813  | -0.234874229548 |
| NM_001206954 | AGER    | 1100 | 1118 | 8.32835956188   |
| NM_019044    | CCDC93  | 29   | 58   | 3.05047493484   |
| NM_003270    | TSPAN6  | 400  | 429  | 4.68252612283   |
| NM_003270    | TSPAN6  | 777  | 818  | 5.92433260851   |
| NM_003270    | TSPAN6  | 673  | 751  | 7.59343408269   |

|           |       |      |      |               |
|-----------|-------|------|------|---------------|
| NM_020860 | STIM2 | 1464 | 1511 | 8.40568858258 |
| NM_020860 | STIM2 | 762  | 819  | 6.40568858258 |
