# Supplementary material for: Oncoprotein AEG-1 is an endoplasmic reticulum RNA-binding protein whose interactome is enriched in organelle resident protein-encoding mRNAs
Source: PubMed Central journal article supplement — RNA. 2018 May;24(5):688–703. doi: 10.1261/rna.063313.117 (PMC5900566; doi:10.1261/rna.063313.117), 2018-05
Supplement: supp_063313.117_Supplemental_Table_3.pdf [file supp_063313.117_Supplemental_Table_3.pdf]

| #Refseq Gene | Cluster  | start | end  | Cluster score      |
|--------------|----------|-------|------|--------------------|
| NM_001143984 | PTPMT1   | 680   | 761  | 5.68873887674      |
| NM_001143984 | PTPMT1   | 240   | 333  | 5.68873887674      |
| NM_001143984 | PTPMT1   | 772   | 880  | 6.10377637602      |
| NM_001143984 | PTPMT1   | 418   | 556  | 6.10377637602      |
| NM_175852    | TXLNA    | 3245  | 3291 | 5.67913473066      |
| NM_175852    | TXLNA    | 2188  | 2222 | 5.76310018972      |
| NM_175852    | TXLNA    | 2530  | 2583 | 7.08520203493      |
| NM_175852    | TXLNA    | 3342  | 3376 | 7.08520203493      |
| NM_175852    | TXLNA    | 2678  | 2727 | 4.75925633987      |
| NM_175852    | TXLNA    | 4342  | 4431 | 7.08520203493      |
| NM_175852    | TXLNA    | 2260  | 2331 | 5.76310018972      |
| NM_175852    | TXLNA    | 4008  | 4057 | 5.76326720899      |
| NM_175852    | TXLNA    | 4257  | 4315 | 6.34421884059      |
| NM_175852    | TXLNA    | 961   | 1019 | 4.75925633987      |
| NM_175852    | TXLNA    | 3562  | 3613 | 6.76326720899      |
| NM_175852    | TXLNA    | 2019  | 2105 | 7.08520203493      |
| NM_175852    | TXLNA    | 3161  | 3239 | 5.76327393249      |
| NM_175852    | TXLNA    | 1904  | 2018 | 6.76327394004      |
| NM_016647    | C8orf55  | 827   | 887  | 12.0686928727      |
| NM_016647    | C8orf55  | 142   | 225  | 12.8760478023      |
| NM_016647    | C8orf55  | 532   | 581  | 9.98455367089      |
| NM_016647    | C8orf55  | 1538  | 1637 | 10.0686861492      |
| NM_016647    | C8orf55  | 276   | 385  | 11.0686928803      |
| NM_016647    | C8orf55  | 1705  | 1795 | 11.0686928803      |
| NM_016640    | MRPS30   | 1156  | 1195 | 8.6583023051       |
| NM_016640    | MRPS30   | 242   | 294  | 7.65846932436      |
| NM_016640    | MRPS30   | 422   | 544  | 6.65847605542      |
| NM_016640    | MRPS30   | 671   | 782  | 7.65847605542      |
| NM_016640    | MRPS30   | 1336  | 1453 | 7.65847605542      |
| NM_016640    | MRPS30   | 934   | 1130 | 9.65847605542      |
| NM_016641    | GDE1     | 1275  | 1322 | 4.94021376338      |
| NM_016641    | GDE1     | 1333  | 1384 | 5.35525126999      |
| NM_016641    | GDE1     | 1832  | 1906 | 4.35507751989      |
| NM_016641    | GDE1     | 1116  | 1199 | 5.35525127021      |
| NM_016641    | GDE1     | 683   | 876  | 7.87881322627      |
| NM_016641    | GDE1     | 1551  | 1604 | 4.27111206083      |
| NM_016641    | GDE1     | 2601  | 2672 | 3.35507751989      |
| NM_016641    | GDE1     | 183   | 337  | 6.16260619227      |
| NM_016641    | GDE1     | 390   | 602  | 7.05569098835      |
| NM_016641    | GDE1     | 880   | 1098 | 6.52517627165      |
| NM_001016    | RPS12    | 384   | 461  | 1.38007465962      |
| NM_001016    | RPS12    | 60    | 210  | 2.44420499704      |
| NM_001016    | RPS12    | 17    | 50   | -1.1634961684      |
| NM_001016    | RPS12    | 212   | 271  | 0.505605541703     |
| NM_001016    | RPS12    | 283   | 373  | 0.72799796304      |
| NM_001080825 | TMEM120B |       | 2428 | 2457 6.73581470945 |
| NM_001080825 | TMEM120B |       | 2635 | 2696 6.73598845222 |
| NM_001080826 | SGK223   | 4466  | 4550 | 6.79490125737      |
| NM_018477    | ACTR10   | 885   | 938  | 7.75739305749      |

|           |        |      |      |               |
|-----------|--------|------|------|---------------|
| NM_018477 | ACTR10 | 154  | 231  | 7.17260430708 |
| NM_018477 | ACTR10 | 1233 | 1322 | 7.17260430686 |
| NM_018477 | ACTR10 | 468  | 546  | 7.75756657189 |
| NM_018477 | ACTR10 | 1497 | 1569 | 6.17259757603 |
| NM_205858 | NMB    | 655  | 700  | 10.6326374283 |
| NM_205858 | NMB    | 953  | 1002 | 11.6364812782 |
| NM_205858 | NMB    | 520  | 601  | 11.1374783198 |
| NM_016649 | ESF1   | 643  | 710  | 4.38536251831 |
| NM_016649 | ESF1   | 2485 | 2528 | 2.80040001758 |
| NM_016649 | ESF1   | 2348 | 2461 | 2.80040001758 |
| NM_016649 | ESF1   | 135  | 178  | 2.79638914846 |
| NM_016649 | ESF1   | 1141 | 1243 | 5.12233484353 |
| NM_016649 | ESF1   | 1377 | 1571 | 6.38536924936 |
| NM_016649 | ESF1   | 2714 | 2807 | 3.80040674842 |
| NM_016649 | ESF1   | 2197 | 2340 | 4.38536924936 |
| NM_207118 | GTF2H5 | 21   | 80   | 6.45245995487 |
| NM_001469 | XRCC6  | 979  | 1044 | 4.90276755855 |
| NM_001469 | XRCC6  | 213  | 302  | 3.02829844063 |
| NM_001469 | XRCC6  | 2090 | 2131 | 3.7652640348  |
| NM_001469 | XRCC6  | 1052 | 1138 | 4.02829844063 |
| NM_001469 | XRCC6  | 303  | 408  | 4.44333593991 |
| NM_001469 | XRCC6  | 2131 | 2248 | 3.02829844063 |
| NM_001469 | XRCC6  | 412  | 965  | 7.50942513037 |
| NM_001469 | XRCC6  | 1139 | 1599 | 6.86960069461 |
| NM_001469 | XRCC6  | 1610 | 2049 | 6.30131693504 |
| NM_004107 | FCGRT  | 1478 | 1522 | 5.28688685208 |
| NM_004107 | FCGRT  | 1340 | 1418 | 5.87202310312 |
| NM_004107 | FCGRT  | 1116 | 1204 | 6.60898869728 |
| NM_004107 | FCGRT  | 971  | 1032 | 4.28705387134 |
| NM_004107 | FCGRT  | 1426 | 1467 | 4.28688685208 |
| NM_004107 | FCGRT  | 554  | 611  | 5.28688685208 |
| NM_004107 | FCGRT  | 1272 | 1323 | 5.28688685208 |
| NM_004107 | FCGRT  | 447  | 536  | 5.2870606024  |
| NM_004107 | FCGRT  | 698  | 772  | 5.28706060239 |
| NM_004107 | FCGRT  | 861  | 964  | 5.2870606024  |
| NM_004104 | FASN   | 8044 | 8093 | 3.68945080135 |
| NM_004104 | FASN   | 6641 | 6719 | 5.35855251146 |
| NM_004104 | FASN   | 1439 | 1512 | 6.35855251146 |
| NM_004104 | FASN   | 8141 | 8201 | 3.77359001051 |
| NM_004104 | FASN   | 7569 | 7626 | 4.77359001074 |
| NM_004104 | FASN   | 8427 | 8466 | 4.77359001074 |
| NM_004104 | FASN   | 2946 | 3045 | 5.77359001074 |
| NM_004104 | FASN   | 5308 | 5583 | 8.90287302768 |
| NM_004104 | FASN   | 6722 | 6907 | 6.94351501218 |
| NM_004104 | FASN   | 6018 | 6276 | 8.58094493279 |
| NM_004104 | FASN   | 6283 | 6632 | 8.86105285199 |
| NM_004104 | FASN   | 7474 | 7527 | 4.77341626042 |
| NM_004104 | FASN   | 8283 | 8426 | 8.72778632112 |
| NM_004104 | FASN   | 2906 | 2945 | 4.68945080135 |
| NM_004104 | FASN   | 1566 | 1880 | 9.0589922296  |

|           |       |       |       |                |
|-----------|-------|-------|-------|----------------|
| NM_004104 | FASN  | 773   | 865   | 6.35855251146  |
| NM_004104 | FASN  | 7281  | 7411  | 6.09551810562  |
| NM_004104 | FASN  | 6912  | 7017  | 6.35855251146  |
| NM_004104 | FASN  | 1135  | 1347  | 7.23302162937  |
| NM_004104 | FASN  | 7105  | 7280  | 7.77359001074  |
| NM_004104 | FASN  | 7026  | 7092  | 3.77358977482  |
| NM_004104 | FASN  | 1958  | 2235  | 7.77359001074  |
| NM_004104 | FASN  | 7724  | 7808  | 3.77359001074  |
| NM_004104 | FASN  | 118   | 662   | 9.19985476544  |
| NM_004104 | FASN  | 5601  | 5917  | 8.47402972888  |
| NM_004104 | FASN  | 1366  | 1432  | 4.77359001074  |
| NM_004104 | FASN  | 669   | 746   | 4.77359001074  |
| NM_004104 | FASN  | 2278  | 2904  | 9.19985476544  |
| NM_004104 | FASN  | 5094  | 5305  | 6.58094493279  |
| NM_004104 | FASN  | 4558  | 5075  | 9.47402972888  |
| NM_004104 | FASN  | 3474  | 4551  | 10.0589922296  |
| NM_004104 | FASN  | 3050  | 3444  | 8.41744620051  |
| NM_004104 | FASN  | 7819  | 8043  | 8.29715196679  |
| NM_004104 | FASN  | 871   | 1060  | 7.09551810562  |
| NM_007100 | ATP5I | 221   | 285   | 2.55057341761  |
| NM_007100 | ATP5I | 291   | 347   | 1.55057318169  |
| NM_007100 | ATP5I | 82    | 174   | 0.550573417613 |
| NM_007107 | SSR3  | 2194  | 2244  | 3.15335063652  |
| NM_007107 | SSR3  | 2121  | 2188  | 3.15335063652  |
| NM_007107 | SSR3  | 3004  | 3074  | 3.1493397674   |
| NM_007107 | SSR3  | 3438  | 3502  | 4.15335736758  |
| NM_007107 | SSR3  | 983   | 1034  | 4.15335736735  |
| NM_007107 | SSR3  | 893   | 976   | 4.7383198683   |
| NM_007107 | SSR3  | 1952  | 2010  | 4.15335736757  |
| NM_007107 | SSR3  | 2057  | 2106  | 4.73831986808  |
| NM_007107 | SSR3  | 2927  | 2979  | 4.73430226812  |
| NM_007107 | SSR3  | 58    | 99    | 4.73831986808  |
| NM_007107 | SSR3  | 1287  | 1376  | 5.15335736758  |
| NM_007107 | SSR3  | 792   | 893   | 6.15335736758  |
| NM_007107 | SSR3  | 3586  | 3650  | 3.15335063652  |
| NM_007107 | SSR3  | 100   | 148   | 3.15335713166  |
| NM_007107 | SSR3  | 1728  | 1785  | 4.1493397674   |
| NM_007107 | SSR3  | 151   | 738   | 9.57962212228  |
| NM_007107 | SSR3  | 1038  | 1144  | 5.15335736758  |
| NM_007107 | SSR3  | 1445  | 1604  | 6.61278898621  |
| NM_000489 | ATRX  | 7072  | 7130  | 4.91839422279  |
| NM_000489 | ATRX  | 6103  | 6152  | 5.91839422279  |
| NM_000489 | ATRX  | 10129 | 10286 | 8.17245843362  |
| NM_000489 | ATRX  | 9198  | 9296  | 5.00253319626  |
| NM_000489 | ATRX  | 5306  | 5361  | 4.998515832    |
| NM_000489 | ATRX  | 9982  | 10055 | 6.00253343218  |
| NM_000489 | ATRX  | 8901  | 8936  | 6.00253319626  |
| NM_000489 | ATRX  | 9470  | 9513  | 4.998515832    |
| NM_000489 | ATRX  | 5760  | 5841  | 6.00235968186  |
| NM_000489 | ATRX  | 6760  | 6823  | 4.998515832    |

|           |          |       |       |                    |
|-----------|----------|-------|-------|--------------------|
| NM_000489 | ATRX     | 161   | 201   | 6.00252670112      |
| NM_000489 | ATRX     | 927   | 976   | 5.91839422279      |
| NM_000489 | ATRX     | 888   | 926   | 4.91839422279      |
| NM_000489 | ATRX     | 6962  | 7023  | 5.00235968186      |
| NM_000489 | ATRX     | 6517  | 6596  | 5.00253319626      |
| NM_000489 | ATRX     | 5133  | 5260  | 6.00253343218      |
| NM_000489 | ATRX     | 10068 | 10116 | 5.00235968186      |
| NM_000489 | ATRX     | 498   | 595   | 6.00235968186      |
| NM_000489 | ATRX     | 8234  | 8330  | 6.00253343218      |
| NM_000489 | ATRX     | 2138  | 2188  | 5.00235968186      |
| NM_007104 | RPL10A   | 186   | 423   | 2.2781616057       |
| NM_007104 | RPL10A   | 458   | 665   | 2.5297003727       |
| NM_007104 | RPL10A   | 8     | 184   | 0.885844182923     |
| NM_000485 | APRT     | 19    | 83    | 5.2638879323       |
| NM_007108 | TCEB2    | 355   | 421   | 5.30486580024      |
| NM_007108 | TCEB2    | 184   | 235   | 4.88983503179      |
| NM_000483 | APOC2    | 556   | 601   | 3.52460213237      |
| NM_000483 | APOC2    | 243   | 345   | 3.93963963165      |
| NM_000483 | APOC2    | 460   | 548   | 5.39907125029      |
| NM_000483 | APOC2    | 48    | 161   | 5.52460213237      |
| NM_000483 | APOC2    | 361   | 427   | 3.93963963165      |
| NM_005800 | USPL1    | 1145  | 1217  | 7.91720367202      |
| NM_005800 | USPL1    | 3356  | 3426  | 8.91720367202      |
| NM_014177 | C18orf55 |       | 1083  | 1150 4.15981144016 |
| NM_014177 | C18orf55 |       | 890   | 1008 5.15981817121 |
| NM_005258 | GCHFR    | 202   | 305   | 8.28193189294      |
| NM_003824 | FADD     | 1584  | 1705  | 6.32453177715      |
| NM_003824 | FADD     | 565   | 669   | 6.73956928398      |
| NM_003824 | FADD     | 422   | 478   | 5.73956255292      |
| NM_003825 | SNAP23   | 1081  | 1126  | 4.53043725548      |
| NM_003825 | SNAP23   | 1922  | 1957  | 2.86150929569      |
| NM_003825 | SNAP23   | 894   | 949   | 3.86150929569      |
| NM_003827 | NAPA     | 611   | 662   | 6.35422688037      |
| NM_003827 | NAPA     | 894   | 976   | 6.35423360387      |
| NM_003827 | NAPA     | 695   | 780   | 8.35423361142      |
| NM_003827 | NAPA     | 549   | 592   | 6.27009440204      |
| NM_003827 | NAPA     | 1442  | 1504  | 6.3542333755       |
| NM_003827 | NAPA     | 851   | 883   | 7.85505690276      |
| NM_003827 | NAPA     | 1569  | 1657  | 6.3542333755       |
| NM_003820 | TNFRSF14 |       | 1338  | 1415 9.02626252785 |
| NM_003820 | TNFRSF14 |       | 270   | 317 7.43728242696  |
| NM_003820 | TNFRSF14 |       | 1497  | 1636 9.44130002713 |
| NM_003820 | TNFRSF14 |       | 627   | 702 9.02608877753  |
| NM_003821 | RIPK2    | 1423  | 1483  | 6.85726962928      |
| NM_003821 | RIPK2    | 1642  | 1737  | 5.85325203666      |
| NM_012181 | FKBP8    | 237   | 288   | 4.61301793007      |
| NM_012181 | FKBP8    | 474   | 564   | 6.61301793762      |
| NM_012181 | FKBP8    | 1128  | 1167  | 3.61301793007      |
| NM_012181 | FKBP8    | 169   | 236   | 3.61301793007      |
| NM_012181 | FKBP8    | 1271  | 1336  | 3.61301793007      |

|              |          |      |      |                    |
|--------------|----------|------|------|--------------------|
| NM_012181    | FKBP8    | 685  | 751  | 4.61301793762      |
| NM_012181    | FKBP8    | 383  | 459  | 4.61301793007      |
| NM_012181    | FKBP8    | 923  | 977  | 3.6130177017       |
| NM_012181    | FKBP8    | 104  | 164  | 6.42037285968      |
| NM_001017408 | GOPC     | 958  | 1019 | 3.9996382962       |
| NM_001017408 | GOPC     | 2028 | 2077 | 3.08360375526      |
| NM_001017408 | GOPC     | 3154 | 3207 | 4.58460079692      |
| NM_001017408 | GOPC     | 1516 | 1602 | 4.08377750558      |
| NM_003828    | MTMR1    | 1477 | 1514 | 7.15331254989      |
| NM_003828    | MTMR1    | 1719 | 1811 | 7.15732991414      |
| NM_003828    | MTMR1    | 1882 | 1976 | 8.15733015006      |
| NM_014173    | BABAM1   | 1370 | 1432 | 7.30626774342      |
| NM_014173    | BABAM1   | 665  | 730  | 5.98433964852      |
| NM_014173    | BABAM1   | 730  | 785  | 5.98433964853      |
| NM_014173    | BABAM1   | 450  | 488  | 5.98416589821      |
| NM_014173    | BABAM1   | 1143 | 1195 | 6.56930214924      |
| NM_014173    | BABAM1   | 540  | 665  | 7.79169457059      |
| NM_001682    | ATP2B1   | 3546 | 3656 | 8.86042260053      |
| NM_001682    | ATP2B1   | 4402 | 4453 | 6.86042236461      |
| NM_001682    | ATP2B1   | 3663 | 3730 | 7.59738819469      |
| NM_001682    | ATP2B1   | 307  | 363  | 5.27546009226      |
| NM_001682    | ATP2B1   | 2595 | 2683 | 8.86042260053      |
| NM_001682    | ATP2B1   | 1652 | 1761 | 8.59738819469      |
| NM_001682    | ATP2B1   | 4575 | 4646 | 6.86024885021      |
| NM_001682    | ATP2B1   | 4831 | 4894 | 6.2754600998       |
| NM_001682    | ATP2B1   | 4171 | 4269 | 7.59738819469      |
| NM_001682    | ATP2B1   | 4287 | 4334 | 7.27144249963      |
| NM_001682    | ATP2B1   | 1785 | 1958 | 9.2754600998       |
| NM_001682    | ATP2B1   | 2534 | 2584 | 6.27546009226      |
| NM_001682    | ATP2B1   | 1268 | 1335 | 7.2754600998       |
| NM_001682    | ATP2B1   | 3731 | 3924 | 9.59738819469      |
| NM_001682    | ATP2B1   | 153  | 302  | 7.86042260053      |
| NM_001682    | ATP2B1   | 3097 | 3542 | 10.5608623187      |
| NM_001682    | ATP2B1   | 3929 | 4165 | 9.36292294105      |
| NM_001682    | ATP2B1   | 4672 | 4748 | 6.86042260053      |
| NM_001682    | ATP2B1   | 2692 | 3057 | 10.6677775226      |
| NM_001682    | ATP2B1   | 1414 | 1487 | 5.2754600998       |
| NM_001682    | ATP2B1   | 1960 | 2534 | 11.3198542192      |
| NM_001682    | ATP2B1   | 1491 | 1648 | 8.86042260053      |
| NM_001682    | ATP2B1   | 2    | 86   | 6.86042260053      |
| NM_001682    | ATP2B1   | 535  | 1130 | 10.5233876132      |
| NM_001683    | ATP2B2   | 1632 | 1686 | 7.82129899232      |
| NM_001680    | FXVD2    | 329  | 435  | 9.04401859986      |
| NM_001680    | FXVD2    | 53   | 206  | 10.9509091955      |
| NM_001686    | ATP5B    | 146  | 275  | 5.18201108991      |
| NM_001686    | ATP5B    | 581  | 1475 | 9.12345890755      |
| NM_001686    | ATP5B    | 1488 | 1822 | 7.08013147589      |
| NM_001686    | ATP5B    | 288  | 575  | 7.36643566104      |
| NM_001025780 | FAM108B1 |      | 1381 | 1444 7.64936524627 |
| NM_001025780 | FAM108B1 |      | 1698 | 1740 6.64535437715 |

|           |           |      |      |               |               |
|-----------|-----------|------|------|---------------|---------------|
| NM_001684 | ATP2B4    | 2066 | 2147 | 9.39409730565 |               |
| NM_001684 | ATP2B4    | 2175 | 2257 | 8.39409730565 |               |
| NM_001684 | ATP2B4    | 1260 | 1304 | 8.47421891486 |               |
| NM_001684 | ATP2B4    | 3235 | 3305 | 8.39409730565 |               |
| NM_001684 | ATP2B4    | 3441 | 3556 | 10.4782365075 |               |
| NM_001866 | COX7B     | 148  | 190  | 3.27799837909 |               |
| NM_001866 | COX7B     | 192  | 300  | 4.86296087982 |               |
| NM_001688 | ATP5F1    | 717  | 809  | 4.72931483174 |               |
| NM_001688 | ATP5F1    | 1122 | 1166 | 3.5593898303  |               |
| NM_001688 | ATP5F1    | 1339 | 1436 | 5.36674475236 |               |
| NM_001688 | ATP5F1    | 859  | 1081 | 6.25982954844 |               |
| NM_001688 | ATP5F1    | 1192 | 1296 | 5.01882144893 |               |
| NM_001688 | ATP5F1    | 365  | 683  | 5.95170725308 |               |
| NM_020738 | KIDINS220 |      | 3354 | 3430          | 8.1563325066  |
| NM_020738 | KIDINS220 |      | 2617 | 2677          | 6.8344041758  |
| NM_020738 | KIDINS220 |      | 1214 | 1287          | 6.83440441172 |
| NM_020738 | KIDINS220 |      | 4618 | 4661          | 5.8342306614  |
| NM_020738 | KIDINS220 |      | 2084 | 2142          | 7.41936691244 |
| NM_020738 | KIDINS220 |      | 4824 | 4886          | 6.75026520233 |
| NM_020738 | KIDINS220 |      | 1398 | 1441          | 5.8344041758  |
| NM_020738 | KIDINS220 |      | 3086 | 3175          | 8.1563325066  |
| NM_020738 | KIDINS220 |      | 3206 | 3324          | 8.41936691244 |
| NM_020738 | KIDINS220 |      | 2769 | 2887          | 7.41936691244 |
| NM_020738 | KIDINS220 |      | 3838 | 3880          | 5.75026520233 |
| NM_020738 | KIDINS220 |      | 1470 | 1539          | 6.83038681154 |
| NM_020738 | KIDINS220 |      | 1615 | 1711          | 7.41936691244 |
| NM_020738 | KIDINS220 |      | 330  | 483           | 7.41936691244 |
| NM_020738 | KIDINS220 |      | 5125 | 5267          | 6.83440441171 |
| NM_020738 | KIDINS220 |      | 1748 | 1940          | 9.41936691244 |
| NM_020738 | KIDINS220 |      | 2158 | 2363          | 10.4782606015 |
| NM_020738 | KIDINS220 |      | 3908 | 3996          | 7.83440441172 |
| NM_020738 | KIDINS220 |      | 2690 | 2755          | 6.83439768066 |
| NM_020738 | KIDINS220 |      | 2384 | 2581          | 8.83440441172 |
| NM_020738 | KIDINS220 |      | 5522 | 5574          | 5.83439768066 |
| NM_020738 | KIDINS220 |      | 2945 | 3074          | 8.1563325066  |
| NM_020738 | KIDINS220 |      | 915  | 1138          | 9.41936691244 |
| NM_020738 | KIDINS220 |      | 1944 | 2026          | 7.41936691222 |
| NM_000154 | GALK1     | 193  | 257  | 6.2474367855  |               |
| NM_000154 | GALK1     | 696  | 746  | 7.83239928622 |               |
| NM_024031 | PRR14     | 1433 | 1492 | 8.722996111   |               |
| NM_024033 | C7orf49   | 483  | 539  | 7.28568503311 |               |
| NM_024033 | C7orf49   | 180  | 236  | 6.70089628248 |               |
| NM_024033 | C7orf49   | 793  | 862  | 5.70089627515 |               |
| NM_024033 | C7orf49   | 1012 | 1106 | 8.02282437004 |               |
| NM_024038 | C19orf43  |      | 190  | 241           | 5.92805802042 |
| NM_024038 | C19orf43  |      | 568  | 652           | 5.92805825634 |
| NM_024038 | C19orf43  |      | 114  | 171           | 4.3430955197  |
| NM_024038 | C19orf43  |      | 700  | 913           | 8.66502385051 |
| NM_024038 | C19orf43  |      | 668  | 696           | 4.25895654624 |
| NM_024038 | C19orf43  |      | 409  | 514           | 5.92805825634 |

|           |         |      |      |               |
|-----------|---------|------|------|---------------|
| NM_000158 | GBE1    | 861  | 924  | 4.81790698292 |
| NM_000158 | GBE1    | 2350 | 2413 | 5.40304299804 |
| NM_000158 | GBE1    | 1302 | 1357 | 3.81807400219 |
| NM_000158 | GBE1    | 1079 | 1137 | 3.81790698292 |
| NM_000158 | GBE1    | 1898 | 1939 | 4.81406313307 |
| NM_000158 | GBE1    | 621  | 714  | 3.81807400219 |
| NM_000158 | GBE1    | 1186 | 1272 | 5.40304323396 |
| NM_000158 | GBE1    | 1513 | 1573 | 3.81807400219 |
| NM_000158 | GBE1    | 1382 | 1459 | 4.81808073324 |
| NM_000158 | GBE1    | 2722 | 2804 | 5.40303650291 |
| NM_000158 | GBE1    | 2950 | 2998 | 5.31890402458 |
| NM_000158 | GBE1    | 777  | 820  | 3.81406313307 |
| NM_000158 | GBE1    | 1586 | 1671 | 3.81808049732 |
| NM_000158 | GBE1    | 264  | 319  | 4.73394152386 |
| NM_017414 | USP18   | 1301 | 1357 | 6.83097157812 |
| NM_021021 | SNTB1   | 4243 | 4293 | 5.3451856744  |
| NM_021021 | SNTB1   | 1018 | 1086 | 6.34518568195 |
| NM_021021 | SNTB1   | 1891 | 1945 | 5.26104647257 |
| NM_021021 | SNTB1   | 4860 | 4910 | 5.34116808178 |
| NM_021021 | SNTB1   | 2560 | 2630 | 6.93014145162 |
| NM_021021 | SNTB1   | 2392 | 2460 | 5.3451856744  |
| NM_021021 | SNTB1   | 1576 | 1657 | 7.34518568195 |
| NM_015550 | OSBPL3  | 6617 | 6677 | 6.26998523989 |
| NM_015550 | OSBPL3  | 2368 | 2415 | 7.26981172549 |
| NM_015550 | OSBPL3  | 6053 | 6123 | 7.85494797653 |
| NM_015550 | OSBPL3  | 4686 | 4756 | 7.85494797653 |
| NM_015550 | OSBPL3  | 3298 | 3366 | 7.85494797653 |
| NM_015550 | OSBPL3  | 4073 | 4133 | 7.26998546826 |
| NM_015550 | OSBPL3  | 3971 | 4025 | 7.26997874475 |
| NM_015550 | OSBPL3  | 1587 | 1676 | 7.26998547581 |
| NM_015550 | OSBPL3  | 3476 | 3523 | 7.18584626642 |
| NM_015550 | OSBPL3  | 4299 | 4369 | 7.85494774061 |
| NM_015550 | OSBPL3  | 2550 | 2670 | 9.43991047725 |
| NM_015550 | OSBPL3  | 5477 | 5522 | 6.26596787563 |
| NM_015550 | OSBPL3  | 2469 | 2546 | 6.26998546826 |
| NM_015550 | OSBPL3  | 4162 | 4273 | 7.26998547581 |
| NM_015550 | OSBPL3  | 1731 | 1785 | 6.26997874475 |
| NM_015550 | OSBPL3  | 1785 | 1903 | 9.07734039787 |
| NM_015550 | OSBPL3  | 4985 | 5044 | 7.26998523989 |
| NM_015550 | OSBPL3  | 1366 | 1459 | 8.26998547559 |
| NM_015550 | OSBPL3  | 355  | 505  | 8.85494797653 |
| NM_015550 | OSBPL3  | 3131 | 3293 | 8.85494797653 |
| NM_015550 | OSBPL3  | 5236 | 5336 | 6.26998547559 |
| NM_015550 | OSBPL3  | 2894 | 3127 | 7.85494797653 |
| NM_015550 | OSBPL3  | 744  | 896  | 8.26998547581 |
| NM_015550 | OSBPL3  | 4394 | 4452 | 6.26997874475 |
| NM_021027 | UGT1A9  | 1487 | 1534 | 13.3181716493 |
| NM_021027 | UGT1A9  | 1209 | 1283 | 12.6530875394 |
| NM_021029 | RPL36A  | 154  | 480  | 4.34517835975 |
| NM_015556 | SIPA1L1 | 1935 | 2028 | 8.40504921748 |

|              |           |      |      |               |                |
|--------------|-----------|------|------|---------------|----------------|
| NM_015556    | SIPA1L1   | 2346 | 2393 | 7.81606911658 |                |
| NM_015556    | SIPA1L1   | 3756 | 3813 | 8.40504920993 |                |
| NM_015556    | SIPA1L1   | 3342 | 3407 | 7.73594750737 |                |
| NM_015556    | SIPA1L1   | 3146 | 3298 | 8.40504921748 |                |
| NM_015556    | SIPA1L1   | 485  | 535  | 6.81991296644 |                |
| NM_015556    | SIPA1L1   | 4281 | 4355 | 6.82008671675 |                |
| NM_173537    | GTF2IRD2  |      | 613  | 654           | 8.68201754019  |
| NM_173537    | GTF2IRD2  |      | 329  | 398           | 7.68201754019  |
| NM_173537    | GTF2IRD2  |      | 698  | 744           | 9.26698677196  |
| NM_173531    | ZNF100    | 313  | 366  | 10.1845246042 |                |
| NM_015554    | GLCE      | 749  | 790  | 6.43251358788 |                |
| NM_015554    | GLCE      | 616  | 699  | 7.42866973802 |                |
| NM_015554    | GLCE      | 81   | 133  | 6.43268733819 |                |
| NM_015554    | GLCE      | 2473 | 2558 | 7.43268733065 |                |
| NM_015554    | GLCE      | 958  | 1025 | 8.43268710228 |                |
| NM_015554    | GLCE      | 195  | 308  | 9.4326873382  |                |
| NM_015554    | GLCE      | 1870 | 1917 | 6.43268060714 |                |
| NM_015554    | GLCE      | 883  | 932  | 8.0174760886  |                |
| NM_015554    | GLCE      | 1747 | 1851 | 8.01764983892 |                |
| NM_015554    | GLCE      | 3608 | 3666 | 7.42866973802 |                |
| NM_018309    | TBC1D23   | 2051 | 2125 | 5.23120473171 |                |
| NM_003352    | SUM01     | 206  | 267  | 5.93822333034 |                |
| NM_003352    | SUM01     | 1092 | 1206 | 5.9382300614  |                |
| NM_003352    | SUM01     | 534  | 594  | 6.35326756068 |                |
| NM_003352    | SUM01     | 41   | 94   | 4.35326755313 |                |
| NM_003352    | SUM01     | 760  | 847  | 6.35326756067 |                |
| NM_003352    | SUM01     | 347  | 439  | 5.35326756068 |                |
| NM_001011725 | HNRNPA1L2 |      | 953  | 1080          | 4.66855131173  |
| NM_001011725 | HNRNPA1L2 |      | 1626 | 1718          | 3.90301656537  |
| NM_001011725 | HNRNPA1L2 |      | 1725 | 1819          | 3.1660509712   |
| NM_001011725 | HNRNPA1L2 |      | 1333 | 1476          | 4.75101347192  |
| NM_001011725 | HNRNPA1L2 |      | 1871 | 2138          | 4.97340589326  |
| NM_001011725 | HNRNPA1L2 |      | 1509 | 1551          | 0.581081739427 |
| NM_001011725 | HNRNPA1L2 |      | 1160 | 1330          | 5.10465042654  |
| NM_001011725 | HNRNPA1L2 |      | 1555 | 1625          | 1.58108847048  |
| NM_001011725 | HNRNPA1L2 |      | 1085 | 1151          | 1.58108847026  |
| NM_003350    | UBE2V2    | 905  | 957  | 2.14185583822 |                |
| NM_003350    | UBE2V2    | 437  | 492  | 2.06173422901 |                |
| NM_003350    | UBE2V2    | 196  | 266  | 2.14586670734 |                |
| NM_003350    | UBE2V2    | 543  | 589  | 3.72681833894 |                |
| NM_001011722 | ARHGEF10L |      | 14   | 66            | 5.96793728111  |
| NM_001011722 | ARHGEF10L |      | 905  | 952           | 5.96409343125  |
| NM_001011722 | ARHGEF10L |      | 4188 | 4253          | 6.96811103143  |
| NM_001011722 | ARHGEF10L |      | 2923 | 2973          | 5.88397182204  |
| NM_001011722 | ARHGEF10L |      | 1960 | 2023          | 8.29003912631  |
| NM_001011722 | ARHGEF10L |      | 1587 | 1633          | 5.96409343125  |
| NM_001011722 | ARHGEF10L |      | 2168 | 2204          | 6.96409343125  |
| NM_001011722 | ARHGEF10L |      | 241  | 278           | 6.96811079551  |
| NM_001011722 | ARHGEF10L |      | 3012 | 3093          | 5.96810430037  |
| NM_001011722 | ARHGEF10L |      | 1392 | 1468          | 7.55307353215  |



|              |           |      |      |      |               |
|--------------|-----------|------|------|------|---------------|
| NM_001011722 | ARHGEF10L |      | 2788 | 2911 | 6.96811103143 |
| NM_001011722 | ARHGEF10L |      | 2333 | 2420 | 6.96811103143 |
| NM_006275    | SRSF6     | 2640 | 2666 |      | 1.93284242868 |
| NM_006275    | SRSF6     | 719  | 755  |      | 2.93284892381 |
| NM_006275    | SRSF6     | 130  | 200  |      | 1.93267540941 |
| NM_006275    | SRSF6     | 274  | 377  |      | 2.93284915973 |
| NM_006275    | SRSF6     | 3244 | 3286 |      | 1.93284242868 |
| NM_006275    | SRSF6     | 1540 | 1642 |      | 4.51781166045 |
| NM_006275    | SRSF6     | 3016 | 3105 |      | 1.93284915973 |
| NM_006275    | SRSF6     | 2059 | 2136 |      | 3.5178116529  |
| NM_006275    | SRSF6     | 755  | 1031 |      | 5.93284915973 |
| NM_006275    | SRSF6     | 1071 | 1293 |      | 5.51781166045 |
| NM_006275    | SRSF6     | 415  | 690  |      | 6.32516658251 |
| NM_006275    | SRSF6     | 1294 | 1471 |      | 4.93284915973 |
| NM_006275    | SRSF6     | 1720 | 1825 |      | 2.93284915973 |
| NM_003358    | UGCG      | 1385 | 1444 |      | 7.93501605496 |
| NM_003358    | UGCG      | 906  | 974  |      | 7.93501606251 |
| NM_003358    | UGCG      | 766  | 816  |      | 7.93484231219 |
| NM_003358    | UGCG      | 320  | 369  |      | 7.51997832731 |
| NM_003358    | UGCG      | 683  | 759  |      | 7.51997856322 |
| NM_003359    | UGDH      | 3004 | 3076 |      | 4.214338598   |
| NM_003359    | UGDH      | 2915 | 2959 |      | 2.21433186695 |
| NM_003359    | UGDH      | 770  | 869  |      | 4.79930109872 |
| NM_003359    | UGDH      | 2237 | 2316 |      | 2.214338598   |
| NM_003359    | UGDH      | 1908 | 2006 |      | 3.21433859799 |
| NM_003359    | UGDH      | 551  | 762  |      | 6.73790055406 |
| NM_003359    | UGDH      | 2552 | 2654 |      | 3.79930109872 |
| NM_003359    | UGDH      | 252  | 528  |      | 7.07231959313 |
| NM_003359    | UGDH      | 1415 | 1691 |      | 7.12122919361 |
| NM_003359    | UGDH      | 2320 | 2442 |      | 4.53626669289 |
| NM_003359    | UGDH      | 1695 | 1866 |      | 3.79930109872 |
| NM_003359    | UGDH      | 907  | 1409 |      | 7.88676393997 |
| NM_005660    | SLC35A2   | 736  | 802  |      | 10.5099930644 |
| NM_005660    | SLC35A2   | 1111 | 1350 |      | 13.41688366   |
| NM_005660    | SLC35A2   | 599  | 736  |      | 11.5099930644 |
| NM_004813    | PEX16     | 687  | 760  |      | 8.03232998633 |
| NM_004814    | SNRNP40   | 194  | 264  |      | 5.76272127553 |
| NM_004814    | SNRNP40   | 1434 | 1489 |      | 4.7628950183  |
| NM_004814    | SNRNP40   | 589  | 626  |      | 5.76272127553 |
| NM_004814    | SNRNP40   | 270  | 357  |      | 7.08482312073 |
| NM_004814    | SNRNP40   | 777  | 853  |      | 4.76289478993 |
| NM_004814    | SNRNP40   | 872  | 959  |      | 5.76289502585 |
| NM_004815    | ARHGAP29  |      | 340  | 387  | 7.05281530783 |
| NM_004815    | ARHGAP29  |      | 405  | 468  | 6.05298232709 |
| NM_004815    | ARHGAP29  |      | 2454 | 2539 | 6.04897145797 |
| NM_004815    | ARHGAP29  |      | 842  | 910  | 7.05298882223 |
| NM_020199    | C5orf15   | 1209 | 1290 |      | 7.68375560671 |
| NM_020199    | C5orf15   | 1082 | 1125 |      | 8.26871810744 |
| NM_020199    | C5orf15   | 499  | 538  |      | 7.59961639733 |
| NM_020199    | C5orf15   | 548  | 674  |      | 8.49111052877 |

|           |         |      |      |               |
|-----------|---------|------|------|---------------|
| NM_020199 | C5orf15 | 1632 | 1674 | 5.67973800654 |
| NM_020199 | C5orf15 | 1144 | 1204 | 6.67973800654 |
| NM_020199 | C5orf15 | 1337 | 1387 | 7.26871810744 |
| NM_020199 | C5orf15 | 818  | 1004 | 9.26871810744 |
| NM_020199 | C5orf15 | 204  | 334  | 8.49111052877 |
| NM_020199 | C5orf15 | 371  | 442  | 7.26871809989 |
| NM_020198 | CCDC47  | 1542 | 1612 | 4.67269659473 |
| NM_020198 | CCDC47  | 2022 | 2078 | 3.67269659472 |
| NM_020198 | CCDC47  | 2860 | 2917 | 4.08773408646 |
| NM_020198 | CCDC47  | 166  | 236  | 3.087734094   |
| NM_020198 | CCDC47  | 1782 | 1856 | 5.25765909545 |
| NM_020198 | CCDC47  | 2996 | 3040 | 2.08773408646 |
| NM_020198 | CCDC47  | 2554 | 2703 | 5.78817381215 |
| NM_020198 | CCDC47  | 1869 | 1997 | 5.40966218889 |
| NM_020198 | CCDC47  | 3328 | 3397 | 2.08371649383 |
| NM_020198 | CCDC47  | 275  | 677  | 7.97037714337 |
| NM_020198 | CCDC47  | 2478 | 2520 | 3.67252284441 |
| NM_020198 | CCDC47  | 2359 | 2456 | 3.67269635881 |
| NM_020198 | CCDC47  | 3042 | 3101 | 3.08371649383 |
| NM_020198 | CCDC47  | 1622 | 1769 | 4.087734094   |
| NM_020198 | CCDC47  | 678  | 1379 | 9.0650140175  |
| NM_020198 | CCDC47  | 1382 | 1532 | 6.17519693526 |
| NM_020198 | CCDC47  | 2131 | 2230 | 5.54716571264 |
| NM_004818 | DDX23   | 2710 | 2773 | 5.14100973022 |
| NM_004818 | DDX23   | 2511 | 2582 | 4.14083598745 |
| NM_004818 | DDX23   | 1820 | 1883 | 6.14100973777 |
| NM_004818 | DDX23   | 1018 | 1094 | 5.14100973777 |
| NM_004818 | DDX23   | 77   | 133  | 4.14100973777 |
| NM_004818 | DDX23   | 2095 | 2145 | 5.14083598745 |
| NM_004818 | DDX23   | 1425 | 1506 | 4.14100300671 |
| NM_004818 | DDX23   | 2395 | 2476 | 6.14100973777 |
| NM_004818 | DDX23   | 1135 | 1246 | 5.14100973777 |
| NM_004818 | DDX23   | 1643 | 1806 | 7.46293783265 |
| NM_004818 | DDX23   | 2852 | 2953 | 5.14100973777 |
| NM_004818 | DDX23   | 1520 | 1614 | 5.72597223849 |
| NM_004818 | DDX23   | 390  | 498  | 5.72597223849 |
| NM_004818 | DDX23   | 1289 | 1416 | 6.94836465982 |
| NM_004818 | DDX23   | 2976 | 3109 | 7.14100973777 |
| NM_004818 | DDX23   | 864  | 977  | 6.46293783265 |
| NM_004818 | DDX23   | 667  | 796  | 5.14100973777 |
| NM_004818 | DDX23   | 1997 | 2092 | 4.14100973777 |
| NM_004818 | DDX23   | 2177 | 2314 | 6.72597223849 |
| NM_004819 | SYMPK   | 830  | 865  | 5.63770177571 |
| NM_004819 | SYMPK   | 727  | 793  | 7.22668186905 |
| NM_004819 | SYMPK   | 3863 | 3920 | 7.64171937566 |
| NM_004819 | SYMPK   | 2374 | 2411 | 6.64154562556 |
| NM_004819 | SYMPK   | 1123 | 1172 | 5.64171913996 |
| NM_004819 | SYMPK   | 2865 | 2950 | 6.64171937588 |
| NM_004819 | SYMPK   | 680  | 727  | 6.64171913996 |
| NM_004819 | SYMPK   | 3144 | 3210 | 6.64171264483 |

|           |          |      |      |               |               |
|-----------|----------|------|------|---------------|---------------|
| NM_004819 | SYMPK    | 865  | 917  | 5.64171913996 |               |
| NM_004819 | SYMPK    | 3044 | 3096 | 7.2266818766  |               |
| NM_004819 | SYMPK    | 2299 | 2369 | 7.96364747077 |               |
| NM_004819 | SYMPK    | 1568 | 1656 | 7.64171937588 |               |
| NM_004819 | SYMPK    | 1346 | 1490 | 5.64171937588 |               |
| NM_004819 | SYMPK    | 553  | 628  | 8.44907429794 |               |
| NM_004819 | SYMPK    | 1000 | 1061 | 5.64154562556 |               |
| NM_004819 | SYMPK    | 2152 | 2285 | 5.64171937588 |               |
| NM_004819 | SYMPK    | 2556 | 2647 | 7.2266818766  |               |
| NM_004819 | SYMPK    | 2649 | 2862 | 8.2266818766  |               |
| NM_004819 | SYMPK    | 330  | 488  | 8.64171937588 |               |
| NM_020195 | SDR39U1  | 953  | 1081 | 8.52604833253 |               |
| NM_020195 | SDR39U1  | 414  | 441  | 8.52203073235 |               |
| NM_020194 | MFF      | 618  | 715  | 6.5696556608  |               |
| NM_020194 | MFF      | 1166 | 1228 | 4.98451940976 |               |
| NM_020194 | MFF      | 1242 | 1299 | 3.98469292416 |               |
| NM_020192 | C7orf36  | 236  | 300  | 7.98643110808 |               |
| NM_020192 | C7orf36  | 418  | 541  | 7.98643110831 |               |
| NM_020191 | MRPS22   | 634  | 677  | 4.97551576025 |               |
| NM_020191 | MRPS22   | 551  | 625  | 3.97149816763 |               |
| NM_020191 | MRPS22   | 417  | 474  | 6.29744386247 |               |
| NM_020191 | MRPS22   | 496  | 547  | 4.9755157678  |               |
| NM_020191 | MRPS22   | 933  | 1001 | 5.56030451821 |               |
| NM_020191 | MRPS22   | 29   | 84   | 5.56047826852 |               |
| NM_020191 | MRPS22   | 889  | 929  | 3.97149816763 |               |
| NM_020191 | MRPS22   | 756  | 874  | 6.56047826852 |               |
| NM_020190 | OLFML3   | 866  | 914  | 9.10533331617 |               |
| NM_020190 | OLFML3   | 1077 | 1151 | 10.6903025479 |               |
| NM_020190 | OLFML3   | 1480 | 1591 | 11.1053400472 |               |
| NM_020190 | OLFML3   | 1010 | 1065 | 11.105340047  |               |
| NM_020190 | OLFML3   | 141  | 243  | 11.1053400472 |               |
| NM_020190 | OLFML3   | 1157 | 1225 | 10.1053400472 |               |
| NM_020190 | OLFML3   | 78   | 122  | 9.10533331617 |               |
| NM_020190 | OLFML3   | 351  | 594  | 13.49765747   |               |
| NM_020190 | OLFML3   | 922  | 1008 | 10.690302312  |               |
| NM_020190 | OLFML3   | 256  | 333  | 9.10534004723 |               |
| NM_020190 | OLFML3   | 1256 | 1337 | 9.10534003968 |               |
| NM_020190 | OLFML3   | 762  | 845  | 11.4272681421 |               |
| NM_005663 | WHSC2    | 2139 | 2196 | 8.29116273269 |               |
| NM_005663 | WHSC2    | 1699 | 1735 | 6.70218936285 |               |
| NM_005663 | WHSC2    | 1983 | 2058 | 8.29116946353 |               |
| NM_005663 | WHSC2    | 626  | 667  | 6.70218936285 |               |
| NM_005663 | WHSC2    | 1788 | 1832 | 6.62206775364 |               |
| NM_005663 | WHSC2    | 1015 | 1077 | 7.70620023197 |               |
| NM_005663 | WHSC2    | 359  | 458  | 7.70620696303 |               |
| NM_005663 | WHSC2    | 516  | 624  | 8.29116946375 |               |
| NM_032960 | MAPKAPK2 |      | 751  | 847           | 7.7957704087  |
| NM_032960 | MAPKAPK2 |      | 1489 | 1577          | 7.47384231381 |
| NM_032960 | MAPKAPK2 |      | 2331 | 2369          | 5.38970310443 |
| NM_032960 | MAPKAPK2 |      | 2438 | 2509          | 5.47383558276 |

|              |          |      |      |      |               |
|--------------|----------|------|------|------|---------------|
| NM_032960    | MAPKAPK2 |      | 1708 | 1779 | 6.47384231381 |
| NM_032960    | MAPKAPK2 |      | 2005 | 2044 | 5.38970310443 |
| NM_032960    | MAPKAPK2 |      | 857  | 941  | 7.05880481431 |
| NM_032965    | CCL15    | 414  | 455  |      | 5.9292675563  |
| NM_032965    | CCL15    | 56   | 100  |      | 5.92524995635 |
| NM_032965    | CCL15    | 652  | 715  |      | 7.51423005702 |
| NM_032965    | CCL15    | 262  | 302  |      | 5.84512834714 |
| NM_032965    | CCL15    | 318  | 388  |      | 5.92926732061 |
| NM_001173977 | LRRC16A  | 844  | 878  |      | 8.95072590586 |
| NM_014313    | TMEM50A  | 1162 | 1211 |      | 5.7008962827  |
| NM_014313    | TMEM50A  | 125  | 217  |      | 8.7008962827  |
| NM_014313    | TMEM50A  | 599  | 664  |      | 7.28585878342 |
| NM_014313    | TMEM50A  | 1509 | 1581 |      | 7.7008962827  |
| NM_014313    | TMEM50A  | 956  | 1051 |      | 7.70089628248 |
| NM_014313    | TMEM50A  | 373  | 570  |      | 9.50825120476 |
| NM_014313    | TMEM50A  | 693  | 815  |      | 7.7008962827  |
| NM_003688    | CASK     | 6836 | 6885 |      | 7.49622529163 |
| NM_003688    | CASK     | 3479 | 3515 |      | 7.49622529163 |
| NM_003688    | CASK     | 2004 | 2071 |      | 8.08520539252 |
| NM_003688    | CASK     | 1343 | 1403 |      | 8.5002428918  |
| NM_003688    | CASK     | 1734 | 1795 |      | 7.50023616075 |
| NM_003688    | CASK     | 115  | 194  |      | 8.08520539252 |
| NM_003688    | CASK     | 311  | 374  |      | 7.5002428918  |
| NM_003688    | CASK     | 1468 | 1515 |      | 8.50024288425 |
| NM_003688    | CASK     | 1090 | 1227 |      | 9.82217098669 |
| NM_003688    | CASK     | 1520 | 1552 |      | 7.49622529163 |
| NM_003688    | CASK     | 4818 | 4883 |      | 7.50024265588 |
| NM_003688    | CASK     | 509  | 618  |      | 8.08520539252 |
| NM_003688    | CASK     | 6644 | 6694 |      | 6.49622529163 |
| NM_003688    | CASK     | 29   | 113  |      | 9.5002428918  |
| NM_003688    | CASK     | 204  | 297  |      | 8.08520539252 |
| NM_003688    | CASK     | 1273 | 1330 |      | 7.50024265588 |
| NM_003688    | CASK     | 2611 | 2774 |      | 9.67016789325 |
| NM_003688    | CASK     | 3387 | 3474 |      | 7.5002428918  |
| NM_003688    | CASK     | 2826 | 2890 |      | 7.50023616075 |
| NM_003688    | CASK     | 2445 | 2589 |      | 9.08520539252 |
| NM_003688    | CASK     | 3155 | 3257 |      | 8.08520539252 |
| NM_003688    | CASK     | 621  | 934  |      | 9.95967451044 |
| NM_003688    | CASK     | 1619 | 1717 |      | 8.50024289158 |
| NM_003688    | CASK     | 409  | 498  |      | 6.5002428918  |
| NM_003689    | AKR7A2   | 771  | 808  |      | 6.04662451045 |
| NM_003689    | AKR7A2   | 1181 | 1233 |      | 4.96265905139 |
| NM_003689    | AKR7A2   | 1104 | 1177 |      | 7.04679825322 |
| NM_003689    | AKR7A2   | 534  | 575  |      | 6.63158701117 |
| NM_003680    | YARS     | 1670 | 1752 |      | 4.58584703811 |
| NM_003680    | YARS     | 1137 | 1247 |      | 2.58584030706 |
| NM_003680    | YARS     | 1269 | 1317 |      | 3.58567328779 |
| NM_003680    | YARS     | 1036 | 1116 |      | 4.907775133   |
| NM_003680    | YARS     | 861  | 916  |      | 2.58567328779 |
| NM_003680    | YARS     | 2009 | 2097 |      | 2.58584703789 |

|           |         |      |      |               |
|-----------|---------|------|------|---------------|
| NM_003680 | YARS    | 943  | 988  | 4.17080280778 |
| NM_003680 | YARS    | 2318 | 2360 | 3.58567328779 |
| NM_003680 | YARS    | 1909 | 1987 | 3.58584703789 |
| NM_003680 | YARS    | 1397 | 1496 | 4.907775133   |
| NM_003680 | YARS    | 2388 | 2571 | 5.907775133   |
| NM_003681 | PDXK    | 4734 | 4792 | 5.10060212823 |
| NM_003681 | PDXK    | 4663 | 4684 | 5.09658452805 |
| NM_003681 | PDXK    | 288  | 354  | 5.10060212823 |
| NM_003681 | PDXK    | 1662 | 1742 | 6.68556462895 |
| NM_003681 | PDXK    | 4609 | 4631 | 4.10042837791 |
| NM_003681 | PDXK    | 374  | 448  | 5.100602128   |
| NM_003681 | PDXK    | 1086 | 1119 | 4.09658452805 |
| NM_003681 | PDXK    | 691  | 784  | 5.10060212823 |
| NM_003681 | PDXK    | 2940 | 2986 | 4.09658452805 |
| NM_003681 | PDXK    | 1245 | 1316 | 5.10060189231 |
| NM_003681 | PDXK    | 533  | 580  | 5.09658452805 |
| NM_003681 | PDXK    | 5706 | 5765 | 5.68556462895 |
| NM_003681 | PDXK    | 5259 | 5338 | 5.10060212823 |
| NM_003681 | PDXK    | 1328 | 1353 | 4.09658452805 |
| NM_003681 | PDXK    | 4412 | 4486 | 5.10059539717 |
| NM_003681 | PDXK    | 5903 | 5967 | 4.10060212823 |
| NM_003681 | PDXK    | 2016 | 2081 | 4.10060189231 |
| NM_003681 | PDXK    | 3320 | 3393 | 4.10060212822 |
| NM_003681 | PDXK    | 5414 | 5508 | 4.10060212823 |
| NM_003681 | PDXK    | 181  | 286  | 6.09658452805 |
| NM_003681 | PDXK    | 1515 | 1638 | 6.42253022311 |
| NM_003681 | PDXK    | 7028 | 7110 | 5.10060212823 |
| NM_014311 | SMUG1   | 340  | 395  | 7.90393945011 |
| NM_014311 | SMUG1   | 1070 | 1170 | 9.492919551   |
| NM_145115 | ZNF498  | 124  | 155  | 9.40525296813 |
| NM_145115 | ZNF498  | 3503 | 3546 | 9.40525296813 |
| NM_145115 | ZNF498  | 4146 | 4212 | 8.40525296813 |
| NM_145115 | ZNF498  | 2647 | 2717 | 8.48939216996 |
| NM_003685 | KHSRP   | 2390 | 2465 | 6.40351031545 |
| NM_003685 | KHSRP   | 1554 | 1644 | 5.81854781473 |
| NM_003685 | KHSRP   | 2468 | 2516 | 3.81453021456 |
| NM_003685 | KHSRP   | 3004 | 3108 | 5.40351031545 |
| NM_003685 | KHSRP   | 976  | 1216 | 8.21086523751 |
| NM_003685 | KHSRP   | 2857 | 2987 | 6.62590273679 |
| NM_003685 | KHSRP   | 860  | 962  | 7.14047590962 |
| NM_003685 | KHSRP   | 1409 | 1524 | 6.62590273679 |
| NM_003685 | KHSRP   | 1948 | 2061 | 5.40351031545 |
| NM_003685 | KHSRP   | 553  | 714  | 6.62590273679 |
| NM_003685 | KHSRP   | 722  | 853  | 6.81854781473 |
| NM_003685 | KHSRP   | 2217 | 2377 | 7.62590273679 |
| NM_003685 | KHSRP   | 2589 | 2796 | 7.62590273679 |
| NM_003685 | KHSRP   | 399  | 552  | 6.40351031545 |
| NM_006416 | SLC35A1 | 808  | 854  | 9.17812326036 |
| NM_006416 | SLC35A1 | 251  | 305  | 10.1781299912 |
| NM_006416 | SLC35A1 | 159  | 223  | 8.1781297555  |

|           |         |      |      |               |
|-----------|---------|------|------|---------------|
| NM_006416 | SLC35A1 | 924  | 1017 | 10.1781299914 |
| NM_006416 | SLC35A1 | 1384 | 1441 | 9.17812326036 |
| NM_006416 | SLC35A1 | 720  | 799  | 10.7630924921 |
| NM_006416 | SLC35A1 | 1211 | 1344 | 10.1781299839 |
| NM_006416 | SLC35A1 | 579  | 653  | 9.17812326036 |
| NM_003174 | SVIL    | 4032 | 4088 | 7.1552989892  |
| NM_003172 | SURF1   | 689  | 737  | 6.10621322925 |
| NM_006413 | RPP30   | 253  | 309  | 7.9162114452  |
| NM_006413 | RPP30   | 726  | 763  | 9.00034392353 |
| NM_006413 | RPP30   | 44   | 172  | 9.32227874948 |
| NM_006413 | RPP30   | 848  | 896  | 7.00034392353 |
| NM_006413 | RPP30   | 634  | 709  | 8.58530642426 |
| NM_006413 | RPP30   | 177  | 242  | 9.32227851356 |
| NM_006413 | RPP30   | 456  | 551  | 8.58531315531 |
| NM_003170 | SUPT6H  | 2464 | 2501 | 4.49408676537 |
| NM_003170 | SUPT6H  | 2039 | 2090 | 3.49426051568 |
| NM_003170 | SUPT6H  | 3447 | 3522 | 5.49426051569 |
| NM_003170 | SUPT6H  | 736  | 838  | 3.49426051568 |
| NM_003170 | SUPT6H  | 3165 | 3221 | 5.07922301641 |
| NM_003170 | SUPT6H  | 4465 | 4505 | 5.81618187952 |
| NM_003170 | SUPT6H  | 5588 | 5644 | 4.49426051568 |
| NM_003170 | SUPT6H  | 2763 | 2815 | 3.49408676537 |
| NM_003170 | SUPT6H  | 4375 | 4439 | 4.49426051569 |
| NM_003170 | SUPT6H  | 1291 | 1343 | 4.49024291552 |
| NM_003170 | SUPT6H  | 997  | 1061 | 5.49426051547 |
| NM_003170 | SUPT6H  | 5693 | 5764 | 3.49425378464 |
| NM_003170 | SUPT6H  | 1345 | 1478 | 5.49426051569 |
| NM_003170 | SUPT6H  | 3049 | 3120 | 4.49426051568 |
| NM_003170 | SUPT6H  | 2523 | 2586 | 3.49426051569 |
| NM_003170 | SUPT6H  | 3340 | 3411 | 4.49426051547 |
| NM_003170 | SUPT6H  | 3614 | 3742 | 5.49426051569 |
| NM_003170 | SUPT6H  | 5388 | 5458 | 3.49024291552 |
| NM_003170 | SUPT6H  | 294  | 355  | 3.49425378464 |
| NM_003170 | SUPT6H  | 1214 | 1287 | 4.49426051569 |
| NM_003170 | SUPT6H  | 5250 | 5316 | 5.07922301641 |
| NM_003170 | SUPT6H  | 4571 | 4646 | 5.07922301641 |
| NM_003170 | SUPT6H  | 2587 | 2756 | 6.07922301641 |
| NM_003170 | SUPT6H  | 3239 | 3329 | 4.49426051569 |
| NM_003170 | SUPT6H  | 4121 | 4215 | 3.49426051569 |
| NM_003170 | SUPT6H  | 2174 | 2240 | 3.49426051547 |
| NM_003170 | SUPT6H  | 2839 | 2999 | 6.95369213433 |
| NM_003170 | SUPT6H  | 2241 | 2438 | 5.81618861058 |
| NM_003170 | SUPT6H  | 366  | 504  | 4.49426051569 |
| NM_003170 | SUPT6H  | 4256 | 4374 | 6.07922301641 |
| NM_003170 | SUPT6H  | 4713 | 4815 | 5.07922301641 |
| NM_003170 | SUPT6H  | 3816 | 4059 | 6.07922301641 |
| NM_003171 | SUPV3L1 | 1625 | 1730 | 6.38829858807 |
| NM_003171 | SUPV3L1 | 333  | 417  | 4.80333585165 |
| NM_003171 | SUPV3L1 | 1128 | 1174 | 4.71919687819 |
| NM_003171 | SUPV3L1 | 765  | 816  | 5.71919687819 |

|              |         |       |       |               |
|--------------|---------|-------|-------|---------------|
| NM_003171    | SUPV3L1 | 2076  | 2209  | 5.80333608757 |
| NM_001128845 | SMARCA4 | 2516  | 2580  | 6.14313944916 |
| NM_001128845 | SMARCA4 | 2979  | 3081  | 6.1431327181  |
| NM_001128845 | SMARCA4 | 2069  | 2119  | 5.14313921324 |
| NM_001128845 | SMARCA4 | 491   | 572   | 6.72810194988 |
| NM_001128845 | SMARCA4 | 4903  | 4986  | 6.14313944916 |
| NM_001128845 | SMARCA4 | 3472  | 3546  | 6.72810194988 |
| NM_001128845 | SMARCA4 | 1613  | 1655  | 6.14313921324 |
| NM_001128845 | SMARCA4 | 4988  | 5037  | 7.72810194233 |
| NM_001128845 | SMARCA4 | 3808  | 3881  | 6.14313944916 |
| NM_001128845 | SMARCA4 | 2240  | 2307  | 6.72810194988 |
| NM_001128845 | SMARCA4 | 4278  | 4356  | 5.14313944916 |
| NM_001128845 | SMARCA4 | 2414  | 2496  | 7.14313944916 |
| NM_001128845 | SMARCA4 | 2596  | 2681  | 6.72810194987 |
| NM_001128845 | SMARCA4 | 214   | 266   | 5.05900023977 |
| NM_001128845 | SMARCA4 | 4399  | 4447  | 6.14296569884 |
| NM_001128845 | SMARCA4 | 3169  | 3459  | 9.53545687194 |
| NM_001128845 | SMARCA4 | 2125  | 2194  | 6.72810194233 |
| NM_001128845 | SMARCA4 | 4539  | 4594  | 6.1431327181  |
| NM_001128845 | SMARCA4 | 1906  | 2013  | 7.14313944916 |
| NM_001128845 | SMARCA4 | 5071  | 5155  | 7.14313944916 |
| NM_001128845 | SMARCA4 | 3081  | 3148  | 6.72810171396 |
| NM_001128845 | SMARCA4 | 1105  | 1234  | 6.72810194988 |
| NM_001127320 | UBAP2L  | 2417  | 2490  | 5.84459212474 |
| NM_001127320 | UBAP2L  | 2216  | 2280  | 6.16652021962 |
| NM_001127320 | UBAP2L  | 3097  | 3130  | 3.84441837442 |
| NM_001127320 | UBAP2L  | 91    | 148   | 5.84459212474 |
| NM_001127320 | UBAP2L  | 1129  | 1185  | 5.42955462545 |
| NM_001127320 | UBAP2L  | 1008  | 1062  | 6.1665202194  |
| NM_001127320 | UBAP2L  | 2012  | 2048  | 3.84441837442 |
| NM_001127320 | UBAP2L  | 2521  | 2626  | 6.16652021962 |
| NM_001127320 | UBAP2L  | 2310  | 2409  | 5.42955462546 |
| NM_001127320 | UBAP2L  | 1252  | 1351  | 6.16652021962 |
| NM_001127320 | UBAP2L  | 2734  | 2831  | 6.16652021962 |
| NM_001127320 | UBAP2L  | 3208  | 3271  | 5.42955438954 |
| NM_001127320 | UBAP2L  | 196   | 333   | 5.84459212474 |
| NM_001127320 | UBAP2L  | 1446  | 1570  | 7.16652021962 |
| NM_001127320 | UBAP2L  | 1845  | 1989  | 5.42955462546 |
| NM_001127320 | UBAP2L  | 545   | 732   | 5.42955462546 |
| NM_001127320 | UBAP2L  | 2052  | 2136  | 4.84459212474 |
| NM_001127320 | UBAP2L  | 737   | 929   | 7.65194704679 |
| NM_001127320 | UBAP2L  | 1593  | 1723  | 7.30402374337 |
| NM_001127320 | UBAP2L  | 3336  | 3401  | 5.42938087514 |
| NM_001127320 | UBAP2L  | 450   | 535   | 5.42955462546 |
| NM_001127321 | CBX5    | 8808  | 8898  | 6.98261805519 |
| NM_001127321 | CBX5    | 2807  | 2904  | 6.98261805519 |
| NM_001127321 | CBX5    | 1518  | 1610  | 7.39765555447 |
| NM_001127321 | CBX5    | 9491  | 9572  | 8.20501047653 |
| NM_001127321 | CBX5    | 11389 | 11453 | 6.39765555447 |
| NM_001127321 | CBX5    | 5410  | 5500  | 8.56758055591 |

|              |      |       |       |               |
|--------------|------|-------|-------|---------------|
| NM_001127321 | CBX5 | 11104 | 11152 | 5.39748180415 |
| NM_001127321 | CBX5 | 5668  | 5749  | 5.39765555447 |
| NM_001127321 | CBX5 | 2234  | 2296  | 6.98261805519 |
| NM_001127321 | CBX5 | 8102  | 8175  | 5.39765555447 |
| NM_001127321 | CBX5 | 2554  | 2635  | 7.71958364936 |
| NM_001127321 | CBX5 | 9298  | 9359  | 7.39765554692 |
| NM_001127321 | CBX5 | 1999  | 2043  | 5.39765554692 |
| NM_001127321 | CBX5 | 10310 | 10352 | 5.3936379543  |
| NM_001127321 | CBX5 | 2909  | 2996  | 6.98261805519 |
| NM_001127321 | CBX5 | 4305  | 4340  | 6.89847884581 |
| NM_001127321 | CBX5 | 9394  | 9465  | 5.39765555425 |
| NM_001127321 | CBX5 | 1243  | 1304  | 6.98261781927 |
| NM_001127321 | CBX5 | 5965  | 6051  | 5.3936379543  |
| NM_001127321 | CBX5 | 4618  | 4677  | 7.98261805519 |
| NM_001127321 | CBX5 | 5240  | 5397  | 8.20501047653 |
| NM_001127321 | CBX5 | 10934 | 11045 | 9.09809527261 |
| NM_001127321 | CBX5 | 6351  | 6411  | 6.39765531855 |
| NM_001127321 | CBX5 | 5789  | 5849  | 7.98261805519 |
| NM_001127321 | CBX5 | 3430  | 3470  | 5.39764882342 |
| NM_001127321 | CBX5 | 1314  | 1491  | 8.98261805519 |
| NM_001127321 | CBX5 | 6415  | 6500  | 6.39748180415 |
| NM_001127321 | CBX5 | 434   | 532   | 6.98261805519 |
| NM_001127321 | CBX5 | 4266  | 4304  | 6.39764882342 |
| NM_001127321 | CBX5 | 10676 | 10821 | 9.09809527261 |
| NM_001127321 | CBX5 | 8391  | 8510  | 6.98261805519 |
| NM_001127321 | CBX5 | 11162 | 11220 | 5.3936379543  |
| NM_001127321 | CBX5 | 9766  | 9920  | 8.20501047653 |
| NM_001127321 | CBX5 | 4727  | 4818  | 7.39765555447 |
| NM_001127321 | CBX5 | 601   | 692   | 5.39765555447 |
| NM_001127321 | CBX5 | 72    | 333   | 9.09809527261 |
| NM_001127321 | CBX5 | 6739  | 6870  | 6.98261805519 |
| NM_001127321 | CBX5 | 10184 | 10293 | 6.98261805519 |
| NM_001127321 | CBX5 | 912   | 1201  | 10.1525430566 |
| NM_001127321 | CBX5 | 6653  | 6739  | 7.71958364936 |
| NM_001127321 | CBX5 | 1732  | 1775  | 5.31351634509 |
| NM_001127321 | CBX5 | 10883 | 10927 | 6.89847884581 |
| NM_001127321 | CBX5 | 3087  | 3194  | 6.98261805519 |
| NM_001127321 | CBX5 | 6243  | 6328  | 6.39765555447 |
| NM_001127321 | CBX5 | 8913  | 9052  | 6.98261805519 |
| NM_001127321 | CBX5 | 5513  | 5653  | 7.39765555447 |
| NM_001127321 | CBX5 | 6560  | 6630  | 5.31351634509 |
| NM_001127321 | CBX5 | 2430  | 2506  | 6.39764882342 |
| NM_001127321 | CBX5 | 772   | 904   | 8.98261805519 |
| NM_001127321 | CBX5 | 3215  | 3408  | 9.09809527261 |
| NM_001127321 | CBX5 | 4054  | 4228  | 8.39765555447 |
| NM_001127321 | CBX5 | 10523 | 10588 | 6.39765554692 |
| NM_001127321 | CBX5 | 6879  | 6960  | 5.39765555447 |
| NM_001127321 | CBX5 | 5128  | 5237  | 7.39765555447 |
| NM_001127321 | CBX5 | 2106  | 2229  | 8.98261805519 |
| NM_001127321 | CBX5 | 8269  | 8388  | 5.39765555447 |



|              |         |       |       |               |
|--------------|---------|-------|-------|---------------|
| NM_001127321 | CBX5    | 7221  | 7614  | 10.2050104765 |
| NM_001127321 | CBX5    | 4879  | 5029  | 7.71958364936 |
| NM_001127321 | CBX5    | 8618  | 8701  | 5.39765554692 |
| NM_001127321 | CBX5    | 2636  | 2760  | 7.39765555447 |
| NM_001127321 | CBX5    | 10389 | 10520 | 7.71958364936 |
| NM_001127321 | CBX5    | 6971  | 7131  | 5.39765555447 |
| NM_002889    | RARRES2 | 397   | 468   | 7.35368081536 |
| NM_002889    | RARRES2 | 480   | 510   | 5.35368057944 |
| NM_002889    | RARRES2 | 253   | 377   | 8.16103573741 |
| NM_002889    | RARRES2 | 513   | 593   | 7.67560891024 |
| NM_002889    | RARRES2 | 15    | 154   | 8.16103573741 |
| NM_002018    | FLII    | 2088  | 2229  | 7.32780016512 |
| NM_002018    | FLII    | 2423  | 2484  | 4.32780016512 |
| NM_002018    | FLII    | 3549  | 3613  | 4.32780016512 |
| NM_002018    | FLII    | 460   | 520   | 5.32780016511 |
| NM_002018    | FLII    | 2702  | 2763  | 5.91276266584 |
| NM_002018    | FLII    | 3736  | 3812  | 7.13515508717 |
| NM_002018    | FLII    | 1191  | 1250  | 5.3277999292  |
| NM_002018    | FLII    | 3904  | 3942  | 4.32378256494 |
| NM_002018    | FLII    | 2005  | 2061  | 4.3276264148  |
| NM_002018    | FLII    | 2884  | 2936  | 4.24366095573 |
| NM_002018    | FLII    | 3623  | 3665  | 5.91275593478 |
| NM_002018    | FLII    | 890   | 987   | 6.64972826    |
| NM_002018    | FLII    | 1250  | 1302  | 4.32378256494 |
| NM_002018    | FLII    | 642   | 728   | 4.32780016512 |
| NM_002018    | FLII    | 3434  | 3529  | 4.3277999292  |
| NM_002018    | FLII    | 3391  | 3434  | 4.32779343406 |
| NM_002018    | FLII    | 3157  | 3217  | 4.32378256494 |
| NM_002018    | FLII    | 813   | 850   | 4.24366095573 |
| NM_002018    | FLII    | 754   | 802   | 4.32378256494 |
| NM_002018    | FLII    | 531   | 625   | 6.32780016512 |
| NM_002018    | FLII    | 991   | 1179  | 7.13515508717 |
| NM_002018    | FLII    | 3012  | 3113  | 5.32780016512 |
| NM_002018    | FLII    | 1691  | 1932  | 6.91276266584 |
| NM_002884    | RAP1A   | 366   | 419   | 3.92432544734 |
| NM_002884    | RAP1A   | 749   | 834   | 2.92431871628 |
| NM_002884    | RAP1A   | 847   | 975   | 5.50928794806 |
| NM_002884    | RAP1A   | 1272  | 1424  | 4.92432544734 |
| NM_002887    | RARS    | 1874  | 1952  | 6.92577887569 |
| NM_002887    | RARS    | 1304  | 1360  | 6.34081637497 |
| NM_002887    | RARS    | 712   | 790   | 5.34080964392 |
| NM_002887    | RARS    | 539   | 583   | 5.3367987748  |
| NM_002887    | RARS    | 47    | 162   | 6.92577887569 |
| NM_002887    | RARS    | 1728  | 1868  | 8.14817129703 |
| NM_002887    | RARS    | 1399  | 1534  | 7.66274446986 |
| NM_002887    | RARS    | 1639  | 1705  | 6.34081636742 |
| NM_002887    | RARS    | 1187  | 1300  | 7.51074137641 |
| NM_002887    | RARS    | 990   | 1150  | 7.14817129703 |
| NM_002887    | RARS    | 613   | 711   | 5.92577863977 |
| NM_002886    | RAP2B   | 1647  | 1711  | 4.98282007501 |

|           |          |      |      |                   |
|-----------|----------|------|------|-------------------|
| NM_002886 | RAP2B    | 599  | 661  | 6.06678553408     |
| NM_002886 | RAP2B    | 2392 | 2432 | 5.98282007501     |
| NM_002886 | RAP2B    | 668  | 695  | 5.98282007501     |
| NM_002886 | RAP2B    | 7268 | 7338 | 5.0669592844      |
| NM_002886 | RAP2B    | 2098 | 2166 | 5.06695255334     |
| NM_002886 | RAP2B    | 204  | 292  | 5.06695928417     |
| NM_139351 | BIN1     | 901  | 986  | 12.1939463271     |
| NM_139351 | BIN1     | 1431 | 1482 | 11.1098071178     |
| NM_139351 | BIN1     | 600  | 718  | 11.1939463271     |
| NM_139351 | BIN1     | 1800 | 1872 | 10.1939463269     |
| NM_139351 | BIN1     | 1062 | 1110 | 11.189928727      |
| NM_002880 | RAF1     | 108  | 155  | 4.81014553376     |
| NM_002880 | RAF1     | 611  | 653  | 4.72601305543     |
| NM_002880 | RAF1     | 540  | 580  | 4.80613466464     |
| NM_002880 | RAF1     | 1977 | 2056 | 5.80613466464     |
| NM_002880 | RAF1     | 2775 | 2862 | 4.81014553376     |
| NM_002880 | RAF1     | 696  | 789  | 7.1320803597      |
| NM_002880 | RAF1     | 893  | 946  | 7.13190660938     |
| NM_002880 | RAF1     | 1039 | 1160 | 7.39511476553     |
| NM_002880 | RAF1     | 789  | 873  | 5.81015226481     |
| NM_002883 | RANGAP1  | 1257 | 1355 | 6.48567519561     |
| NM_002883 | RANGAP1  | 242  | 298  | 5.48567519561     |
| NM_002883 | RANGAP1  | 1645 | 1721 | 6.07063769633     |
| NM_002883 | RANGAP1  | 1106 | 1134 | 5.48566846455     |
| NM_002883 | RANGAP1  | 2198 | 2309 | 7.07063769633     |
| NM_002883 | RANGAP1  | 847  | 889  | 5.48567519561     |
| NM_002883 | RANGAP1  | 2970 | 3041 | 7.07063769633     |
| NM_002883 | RANGAP1  | 2741 | 2849 | 6.0706376961      |
| NM_002883 | RANGAP1  | 2863 | 2918 | 6.48567519561     |
| NM_002883 | RANGAP1  | 315  | 377  | 4.40153598622     |
| NM_002883 | RANGAP1  | 1891 | 1940 | 5.48550144529     |
| NM_002883 | RANGAP1  | 1034 | 1097 | 4.48567518806     |
| NM_002883 | RANGAP1  | 79   | 113  | 4.40153598622     |
| NM_002883 | RANGAP1  | 392  | 579  | 8.57313803686     |
| NM_002883 | RANGAP1  | 1723 | 1887 | 7.65560019705     |
| NM_002883 | RANGAP1  | 582  | 845  | 7.80760329049     |
| NM_002883 | RANGAP1  | 1160 | 1249 | 4.4856751956      |
| NM_002883 | RANGAP1  | 122  | 168  | 4.48566846455     |
| NM_002883 | RANGAP1  | 1989 | 2195 | 7.29303011766     |
| NM_002883 | RANGAP1  | 2460 | 2740 | 8.29303011766     |
| NM_002883 | RANGAP1  | 2331 | 2415 | 4.4856751956      |
| NM_002882 | RANBP1   | 1012 | 1090 | 5.09346594694     |
| NM_002882 | RANBP1   | 678  | 732  | 3.09346594694     |
| NM_002882 | RANBP1   | 885  | 977  | 6.79390566508     |
| NM_002882 | RANBP1   | 576  | 673  | 5.09346594694     |
| NM_002882 | RANBP1   | 481  | 564  | 6.26339094839     |
| NM_002882 | RANBP1   | 757  | 827  | 5.09346594694     |
| NM_002882 | RANBP1   | 827  | 878  | 5.67842171661     |
| NM_002882 | RANBP1   | 225  | 479  | 7.67842844766     |
| NM_152773 | TCTEX1D2 |      | 273  | 326 9.84189536431 |

|              |          |      |      |               |               |
|--------------|----------|------|------|---------------|---------------|
| NM_024292    | UBL5     | 327  | 404  | 7.79334745458 |               |
| NM_024292    | UBL5     | 27   | 95   | 4.32989823577 |               |
| NM_024292    | UBL5     | 148  | 325  | 7.79334745458 |               |
| NM_024293    | FAM134A  | 2610 | 2707 | 8.7529496297  |               |
| NM_024293    | FAM134A  | 2512 | 2556 | 7.53055047731 |               |
| NM_024293    | FAM134A  | 1048 | 1141 | 7.53055720082 |               |
| NM_024293    | FAM134A  | 1317 | 1349 | 5.86145549826 |               |
| NM_024293    | FAM134A  | 686  | 754  | 6.94559470764 |               |
| NM_024293    | FAM134A  | 1246 | 1317 | 5.94157710747 |               |
| NM_024293    | FAM134A  | 2350 | 2406 | 7.53055720814 |               |
| NM_024293    | FAM134A  | 765  | 883  | 8.94559470764 |               |
| NM_024293    | FAM134A  | 586  | 661  | 8.7529496297  |               |
| NM_024293    | FAM134A  | 2103 | 2242 | 9.94559470764 |               |
| NM_024293    | FAM134A  | 398  | 524  | 9.11551970909 |               |
| NM_024293    | FAM134A  | 1945 | 2065 | 6.94559470764 |               |
| NM_024293    | FAM134A  | 1691 | 1772 | 6.94559447173 |               |
| NM_024294    | C6orf106 |      | 2004 | 2076          | 4.62101431312 |
| NM_024294    | C6orf106 |      | 1621 | 1673          | 5.03605181262 |
| NM_024294    | C6orf106 |      | 2828 | 2905          | 3.03605181262 |
| NM_024294    | C6orf106 |      | 2422 | 2479          | 4.62101407742 |
| NM_024294    | C6orf106 |      | 1673 | 1733          | 4.0360515767  |
| NM_024294    | C6orf106 |      | 3845 | 3931          | 4.0360515767  |
| NM_024294    | C6orf106 |      | 2186 | 2246          | 4.03203421245 |
| NM_024294    | C6orf106 |      | 1746 | 1856          | 5.62101431334 |
| NM_024294    | C6orf106 |      | 2780 | 2810          | 4.03203421245 |
| NM_024294    | C6orf106 |      | 587  | 747           | 5.03605181262 |
| NM_024294    | C6orf106 |      | 1010 | 1061          | 3.0360515767  |
| NM_024294    | C6orf106 |      | 310  | 450           | 5.62101431334 |
| NM_024295    | DERL1    | 376  | 428  | 8.59484577176 |               |
| NM_024295    | DERL1    | 1219 | 1300 | 9.1798082727  |               |
| NM_024295    | DERL1    | 152  | 217  | 6.59082817181 |               |
| NM_024295    | DERL1    | 1746 | 1835 | 7.59484577198 |               |
| NM_024295    | DERL1    | 262  | 347  | 8.1798082727  |               |
| NM_024295    | DERL1    | 452  | 522  | 7.59484577176 |               |
| NM_024295    | DERL1    | 1302 | 1391 | 8.91677386687 |               |
| NM_024295    | DERL1    | 531  | 865  | 12.3227662265 |               |
| NM_024295    | DERL1    | 2217 | 2267 | 6.59467202166 |               |
| NM_024295    | DERL1    | 1093 | 1202 | 9.1798082727  |               |
| NM_024295    | DERL1    | 948  | 1019 | 8.59484577198 |               |
| NM_024297    | PHF23    | 1715 | 1771 | 7.07562498691 |               |
| NM_024297    | PHF23    | 1286 | 1325 | 5.99165952784 |               |
| NM_024297    | PHF23    | 1616 | 1700 | 8.07579873722 |               |
| NM_024297    | PHF23    | 814  | 893  | 6.07579873723 |               |
| NM_024297    | PHF23    | 1200 | 1256 | 7.07178113705 |               |
| NM_004109    | FDX1     | 709  | 769  | 6.62938178601 |               |
| NM_004109    | FDX1     | 566  | 705  | 9.62938179355 |               |
| NM_004109    | FDX1     | 480  | 546  | 8.21433756322 |               |
| NM_004109    | FDX1     | 800  | 863  | 7.62920804324 |               |
| NM_001202464 | ZMYND11  | 1338 | 1383 | 5.08820947209 |               |
| NM_001202464 | ZMYND11  | 471  | 535  | 4.00424401303 |               |

|              |          |      |      |               |               |
|--------------|----------|------|------|---------------|---------------|
| NM_001202464 | ZMYND11  | 3786 | 3849 | 5.08837649136 |               |
| NM_032508    | TMEM185A |      | 836  | 956           | 10.309446119  |
| NM_032508    | TMEM185A |      | 1848 | 1903          | 7.13550351734 |
| NM_032508    | TMEM185A |      | 373  | 543           | 9.94687603957 |
| NM_032508    | TMEM185A |      | 676  | 779           | 9.13952111752 |
| NM_001010895 | C9orf102 |      | 1345 | 1405          | 8.40374316361 |
| NM_002084    | GPX3     | 1148 | 1225 | 5.04783165297 |               |
| NM_002084    | GPX3     | 469  | 525  | 5.78479724714 |               |
| NM_002084    | GPX3     | 677  | 743  | 5.46286915225 |               |
| NM_002084    | GPX3     | 295  | 335  | 4.37872994287 |               |
| NM_002084    | GPX3     | 1281 | 1398 | 5.78479724714 |               |
| NM_002084    | GPX3     | 536  | 665  | 6.04783165296 |               |
| NM_002087    | GRN      | 2188 | 2234 | 6.98419030705 |               |
| NM_002087    | GRN      | 406  | 479  | 8.39922804224 |               |
| NM_002087    | GRN      | 1625 | 1914 | 10.0996677604 |               |
| NM_002087    | GRN      | 524  | 682  | 9.85865966088 |               |
| NM_002087    | GRN      | 1268 | 1437 | 8.98419054297 |               |
| NM_002087    | GRN      | 1442 | 1588 | 8.72115613713 |               |
| NM_002087    | GRN      | 1941 | 2136 | 9.2065829643  |               |
| NM_002087    | GRN      | 186  | 403  | 9.98419054297 |               |
| NM_002087    | GRN      | 1109 | 1257 | 8.85865966088 |               |
| NM_002087    | GRN      | 762  | 1102 | 10.5285110592 |               |
| NM_002086    | GRB2     | 911  | 958  | 2.23965300768 |               |
| NM_002086    | GRB2     | 976  | 1026 | 2.23563541505 |               |
| NM_002086    | GRB2     | 626  | 700  | 3.8246155084  |               |
| NM_002086    | GRB2     | 305  | 361  | 3.15551380584 |               |
| NM_002086    | GRB2     | 1504 | 1546 | 2.23947926491 |               |
| NM_002086    | GRB2     | 2083 | 2136 | 4.23965300768 |               |
| NM_002086    | GRB2     | 2678 | 2730 | 2.23947926491 |               |
| NM_002086    | GRB2     | 3038 | 3191 | 5.04700793728 |               |
| NM_002086    | GRB2     | 367  | 538  | 5.69908463386 |               |
| NM_002086    | GRB2     | 2013 | 2082 | 2.23947926491 |               |
| NM_002086    | GRB2     | 830  | 893  | 3.23964628417 |               |
| NM_002086    | GRB2     | 1224 | 1314 | 5.40957801667 |               |
| NM_002086    | GRB2     | 2748 | 2897 | 4.82461551595 |               |
| NM_002086    | GRB2     | 1333 | 1455 | 3.23965301522 |               |
| NM_002086    | GRB2     | 700  | 830  | 3.82461551595 |               |
| NM_002086    | GRB2     | 1762 | 1848 | 3.8246155084  |               |
| NM_002086    | GRB2     | 541  | 624  | 2.23964628417 |               |
| NM_001010891 | MTX3     | 4914 | 5000 | 7.7327257527  |               |
| NM_002080    | GOT2     | 55   | 124  | 6.01533043445 |               |
| NM_002080    | GOT2     | 890  | 970  | 6.01533043445 |               |
| NM_002080    | GOT2     | 570  | 617  | 5.42635033355 |               |
| NM_002080    | GOT2     | 640  | 733  | 5.43036793372 |               |
| NM_002080    | GOT2     | 389  | 486  | 7.75229602861 |               |
| NM_002080    | GOT2     | 2364 | 2453 | 5.43036793372 |               |
| NM_002080    | GOT2     | 499  | 555  | 6.01533019853 |               |
| NM_002080    | GOT2     | 777  | 867  | 6.01533043445 |               |
| NM_002080    | GOT2     | 1059 | 1174 | 4.43036793372 |               |
| NM_002080    | GOT2     | 2172 | 2253 | 4.43036120267 |               |

|           |          |      |      |               |               |
|-----------|----------|------|------|---------------|---------------|
| NM_002083 | GPX2     | 667  | 815  | 10.4063243315 |               |
| NM_002083 | GPX2     | 488  | 658  | 10.7933474546 |               |
| NM_002083 | GPX2     | 815  | 1063 | 11.5132395354 |               |
| NM_002083 | GPX2     | 150  | 488  | 11.6127752089 |               |
| NM_006537 | USP3     | 1901 | 1951 | 5.08406529225 |               |
| NM_006537 | USP3     | 1321 | 1377 | 6.08005442313 |               |
| NM_006537 | USP3     | 1492 | 1545 | 6.66501692385 |               |
| NM_006537 | USP3     | 1677 | 1778 | 6.08407201575 |               |
| NM_006537 | USP3     | 2884 | 2943 | 4.99993281392 |               |
| NM_014008 | CCDC22   | 463  | 565  | 8.86047834011 |               |
| NM_003427 | ZNF76    | 1755 | 1790 | 7.86311214193 |               |
| NM_003431 | ZNF124   | 546  | 607  | 9.77967528566 |               |
| NM_014003 | DHX38    | 2752 | 2826 | 6.39883118543 |               |
| NM_014003 | DHX38    | 2362 | 2448 | 4.07288549037 |               |
| NM_014003 | DHX38    | 4318 | 4370 | 5.66186559104 |               |
| NM_014003 | DHX38    | 1296 | 1347 | 4.07689635949 |               |
| NM_014003 | DHX38    | 354  | 428  | 4.07689635949 |               |
| NM_014003 | DHX38    | 2832 | 2886 | 5.66186558371 |               |
| NM_014003 | DHX38    | 2200 | 2255 | 5.07672934022 |               |
| NM_014003 | DHX38    | 1534 | 1580 | 4.07689635949 |               |
| NM_014003 | DHX38    | 2614 | 2711 | 4.07690309054 |               |
| NM_014003 | DHX38    | 1818 | 1876 | 5.07690308299 |               |
| NM_014003 | DHX38    | 878  | 987  | 4.07689635949 |               |
| NM_003010 | MAP2K4   | 2389 | 2425 | 4.40487507416 |               |
| NM_003010 | MAP2K4   | 437  | 537  | 6.07397678426 |               |
| NM_015602 | TOR1AIP1 |      | 2504 | 2563          | 10.3510035406 |
| NM_015602 | TOR1AIP1 |      | 2212 | 2319          | 10.5733959619 |
| NM_015602 | TOR1AIP1 |      | 2837 | 2895          | 10.0879691348 |
| NM_015602 | TOR1AIP1 |      | 2369 | 2498          | 11.5733959619 |
| NM_015602 | TOR1AIP1 |      | 813  | 851           | 8.76603430882 |
| NM_015602 | TOR1AIP1 |      | 1011 | 1199          | 11.0879691348 |
| NM_015602 | TOR1AIP1 |      | 894  | 996           | 9.3510035406  |
| NM_015602 | TOR1AIP1 |      | 1421 | 2205          | 13.8953240568 |
| NM_015602 | TOR1AIP1 |      | 1200 | 1420          | 9.76604103988 |
| NM_015602 | TOR1AIP1 |      | 3207 | 3308          | 9.35100354059 |
| NM_015602 | TOR1AIP1 |      | 2694 | 2798          | 9.3510035406  |
| NM_015353 | KCTD2    | 2284 | 2371 | 6.70576819945 |               |
| NM_015600 | ABHD12   | 891  | 958  | 7.89494372265 |               |
| NM_015600 | ABHD12   | 819  | 879  | 5.81080451327 |               |
| NM_015600 | ABHD12   | 1387 | 1437 | 6.89494348673 |               |
| NM_015600 | ABHD12   | 442  | 487  | 5.89494372264 |               |
| NM_015600 | ABHD12   | 965  | 1070 | 8.21687181754 |               |
| NM_015600 | ABHD12   | 258  | 326  | 5.89494372243 |               |
| NM_015600 | ABHD12   | 1094 | 1337 | 9.89494372265 |               |
| NM_015600 | ABHD12   | 504  | 601  | 8.47990622337 |               |
| NM_015600 | ABHD12   | 611  | 721  | 6.89494372265 |               |
| NM_018235 | CNDP2    | 1070 | 1122 | 5.02460914571 |               |
| NM_018235 | CNDP2    | 1485 | 1540 | 5.02460914571 |               |
| NM_018235 | CNDP2    | 1651 | 1718 | 6.02478289602 |               |
| NM_018235 | CNDP2    | 2527 | 2614 | 6.60974539675 |               |

|           |        |      |      |               |
|-----------|--------|------|------|---------------|
| NM_018235 | CNDP2  | 171  | 273  | 7.83213781808 |
| NM_018235 | CNDP2  | 1159 | 1235 | 6.02478289602 |
| NM_018235 | CNDP2  | 496  | 590  | 6.0247828958  |
| NM_018235 | CNDP2  | 610  | 676  | 5.02460914571 |
| NM_015354 | NUP188 | 2803 | 2859 | 7.25548895154 |
| NM_015354 | NUP188 | 3875 | 3960 | 7.67052621512 |
| NM_015354 | NUP188 | 4738 | 4810 | 5.67052644349 |
| NM_015354 | NUP188 | 4219 | 4291 | 7.25548895176 |
| NM_015354 | NUP188 | 992  | 1040 | 7.25147135159 |
| NM_015354 | NUP188 | 791  | 838  | 7.67052644349 |
| NM_015354 | NUP188 | 4865 | 4917 | 6.58638724166 |
| NM_015354 | NUP188 | 1997 | 2083 | 7.67052645103 |
| NM_015354 | NUP188 | 2479 | 2576 | 7.25548895176 |
| NM_015354 | NUP188 | 316  | 385  | 5.67051971999 |
| NM_015354 | NUP188 | 2869 | 2935 | 5.58638724166 |
| NM_015354 | NUP188 | 1157 | 1246 | 8.67052645104 |
| NM_015354 | NUP188 | 2216 | 2289 | 7.99245454593 |
| NM_015354 | NUP188 | 1743 | 1898 | 7.99245454593 |
| NM_015354 | NUP188 | 1252 | 1291 | 5.67035270072 |
| NM_015354 | NUP188 | 872  | 980  | 7.99245454593 |
| NM_015354 | NUP188 | 1558 | 1659 | 6.67052644349 |
| NM_015354 | NUP188 | 1414 | 1530 | 7.99245454593 |
| NM_015354 | NUP188 | 2293 | 2393 | 5.67052644349 |
| NM_015354 | NUP188 | 64   | 150  | 7.25548895176 |
| NM_015354 | NUP188 | 2675 | 2764 | 7.99245454593 |
| NM_015354 | NUP188 | 3699 | 3785 | 6.67052621512 |
| NM_015354 | NUP188 | 428  | 565  | 8.67052645104 |
| NM_015354 | NUP188 | 3024 | 3104 | 5.66650885087 |
| NM_015354 | NUP188 | 3376 | 3452 | 7.67052645104 |
| NM_015354 | NUP188 | 3489 | 3635 | 7.25548895176 |
| NM_015354 | NUP188 | 2090 | 2173 | 5.67052645103 |
| NM_018237 | CCAR1  | 2444 | 2487 | 3.6429737833  |
| NM_018237 | CCAR1  | 2954 | 3080 | 6.22811003434 |
| NM_018237 | CCAR1  | 1278 | 1338 | 3.6429737833  |
| NM_018237 | CCAR1  | 3765 | 3822 | 5.22793628402 |
| NM_018237 | CCAR1  | 3867 | 3893 | 3.55900832423 |
| NM_018237 | CCAR1  | 965  | 1007 | 3.6429737833  |
| NM_018237 | CCAR1  | 1565 | 1675 | 6.81307253506 |
| NM_018237 | CCAR1  | 1721 | 1791 | 5.22811003434 |
| NM_018237 | CCAR1  | 3694 | 3748 | 3.6431472977  |
| NM_018237 | CCAR1  | 3393 | 3463 | 3.63912993344 |
| NM_018237 | CCAR1  | 3218 | 3325 | 5.22811003433 |
| NM_018237 | CCAR1  | 1126 | 1196 | 3.64314080256 |
| NM_018237 | CCAR1  | 1351 | 1470 | 5.22811003412 |
| NM_015356 | SCRIB  | 553  | 619  | 7.1818851267  |
| NM_015356 | SCRIB  | 2757 | 2826 | 8.76684762742 |
| NM_015356 | SCRIB  | 4797 | 4851 | 7.1818784032  |
| NM_015356 | SCRIB  | 4515 | 4580 | 8.76684763497 |
| NM_015356 | SCRIB  | 306  | 363  | 8.76684090392 |
| NM_015356 | SCRIB  | 3692 | 3756 | 8.17786753408 |

|           |       |       |       |               |
|-----------|-------|-------|-------|---------------|
| NM_015356 | SCRIB | 2627  | 2693  | 7.17786753408 |
| NM_015356 | SCRIB | 1080  | 1121  | 7.09774592487 |
| NM_015356 | SCRIB | 2123  | 2190  | 8.09774592487 |
| NM_015356 | SCRIB | 244   | 306   | 8.76684763475 |
| NM_015356 | SCRIB | 3153  | 3196  | 8.17786753408 |
| NM_015356 | SCRIB | 3648  | 3679  | 7.17786753408 |
| NM_015356 | SCRIB | 387   | 548   | 8.18188513425 |
| NM_015356 | SCRIB | 5007  | 5127  | 8.18188513425 |
| NM_015356 | SCRIB | 3273  | 3343  | 7.17786753408 |
| NM_015356 | SCRIB | 622   | 773   | 9.18188513425 |
| NM_015356 | SCRIB | 786   | 898   | 8.18188513425 |
| NM_015356 | SCRIB | 952   | 1035  | 8.1818784032  |
| NM_018238 | AGK   | 1063  | 1130  | 7.06021276822 |
| NM_002229 | JUNB  | 1735  | 1780  | 7.99382495363 |
| NM_002229 | JUNB  | 1510  | 1561  | 7.9978425538  |
| NM_002229 | JUNB  | 302   | 396   | 7.99784254625 |
| NM_002229 | JUNB  | 477   | 592   | 9.9978425538  |
| NM_002228 | JUN   | 1010  | 1083  | 3.99037632975 |
| NM_002228 | JUN   | 164   | 227   | 4.99037656567 |
| NM_002228 | JUN   | 1089  | 1248  | 3.99037656567 |
| NM_002228 | JUN   | 2300  | 2370  | 3.99037656567 |
| NM_002553 | ORC5  | 1555  | 1652  | 8.62821711105 |
| NM_002553 | ORC5  | 290   | 363   | 8.62821038755 |
| NM_002553 | ORC5  | 1451  | 1494  | 8.62419951843 |
| NM_002553 | ORC5  | 553   | 683   | 9.85060953994 |
| NM_002553 | ORC5  | 1365  | 1449  | 9.62821688268 |
| NM_002553 | ORC5  | 877   | 979   | 8.04325461766 |
| NM_002220 | ITPKA | 821   | 857   | 7.12687472197 |
| NM_002220 | ITPKA | 918   | 965   | 7.04274224364 |
| NM_002223 | ITPR2 | 1212  | 1267  | 3.80128028265 |
| NM_002223 | ITPR2 | 3913  | 4029  | 5.39026038354 |
| NM_002223 | ITPR2 | 7245  | 7303  | 3.80529788283 |
| NM_002223 | ITPR2 | 7981  | 8034  | 5.80529764691 |
| NM_002223 | ITPR2 | 10151 | 10213 | 3.80529787528 |
| NM_002223 | ITPR2 | 7348  | 7445  | 3.80529788282 |
| NM_002223 | ITPR2 | 7842  | 7902  | 4.72115867344 |
| NM_002223 | ITPR2 | 7598  | 7657  | 4.80529788282 |
| NM_002223 | ITPR2 | 6618  | 6703  | 6.12722597749 |
| NM_002223 | ITPR2 | 2687  | 2726  | 4.72115867344 |
| NM_002223 | ITPR2 | 7107  | 7180  | 5.39026038355 |
| NM_002223 | ITPR2 | 3010  | 3099  | 5.39008663323 |
| NM_002225 | IVD   | 1825  | 1926  | 7.04170170812 |
| NM_002224 | ITPR3 | 4010  | 4071  | 7.24890997085 |
| NM_002224 | ITPR3 | 2609  | 2694  | 9.24890997085 |
| NM_002224 | ITPR3 | 373   | 407   | 8.57066431542 |
| NM_002224 | ITPR3 | 5839  | 5914  | 7.24890997085 |
| NM_002224 | ITPR3 | 610   | 679   | 7.83387247156 |
| NM_002224 | ITPR3 | 8706  | 8859  | 8.24890997085 |
| NM_002224 | ITPR3 | 5917  | 5968  | 7.8298548714  |
| NM_002224 | ITPR3 | 6913  | 6996  | 9.05626489291 |

|              |          |      |      |               |               |
|--------------|----------|------|------|---------------|---------------|
| NM_002224    | ITPR3    | 1573 | 1628 | 7.24489237068 |               |
| NM_002224    | ITPR3    | 1481 | 1561 | 7.24890997085 |               |
| NM_002224    | ITPR3    | 3058 | 3149 | 8.24890997085 |               |
| NM_002224    | ITPR3    | 1644 | 1716 | 7.24873622053 |               |
| NM_002224    | ITPR3    | 8637 | 8705 | 7.24890997085 |               |
| NM_002224    | ITPR3    | 6106 | 6169 | 6.16477076146 |               |
| NM_002224    | ITPR3    | 4947 | 5034 | 7.24890997085 |               |
| NM_002224    | ITPR3    | 8595 | 8637 | 7.16477076146 |               |
| NM_002224    | ITPR3    | 3786 | 3854 | 7.24489237068 |               |
| NM_002224    | ITPR3    | 1265 | 1303 | 7.24489237068 |               |
| NM_002224    | ITPR3    | 4666 | 4732 | 7.24890997063 |               |
| NM_002224    | ITPR3    | 7363 | 7447 | 6.24890997085 |               |
| NM_002224    | ITPR3    | 2094 | 2211 | 8.24890997085 |               |
| NM_002224    | ITPR3    | 7769 | 8127 | 9.05626489291 |               |
| NM_002224    | ITPR3    | 3546 | 3603 | 7.83387247156 |               |
| NM_002224    | ITPR3    | 6300 | 6407 | 6.24890997085 |               |
| NM_002224    | ITPR3    | 7456 | 7640 | 9.83387247157 |               |
| NM_002224    | ITPR3    | 4346 | 4591 | 10.0562648929 |               |
| NM_002224    | ITPR3    | 8202 | 8321 | 7.24890997085 |               |
| NM_002224    | ITPR3    | 1886 | 1995 | 8.24890973493 |               |
| NM_002224    | ITPR3    | 3207 | 3251 | 6.16477076146 |               |
| NM_002224    | ITPR3    | 5440 | 5573 | 7.24890997085 |               |
| NM_002224    | ITPR3    | 410  | 547  | 8.24890997085 |               |
| NM_002224    | ITPR3    | 2433 | 2598 | 8.83387247157 |               |
| NM_002224    | ITPR3    | 7676 | 7768 | 8.57083806574 |               |
| NM_002224    | ITPR3    | 926  | 1053 | 7.83387247157 |               |
| NM_002224    | ITPR3    | 3159 | 3205 | 6.24873622053 |               |
| NM_002224    | ITPR3    | 8912 | 9000 | 7.24890997085 |               |
| NM_002224    | ITPR3    | 7175 | 7311 | 7.83387247157 |               |
| NM_002224    | ITPR3    | 2827 | 2968 | 7.83387247157 |               |
| NM_002224    | ITPR3    | 6177 | 6254 | 7.24890323979 |               |
| NM_002224    | ITPR3    | 2697 | 2764 | 6.24873622053 |               |
| NM_002224    | ITPR3    | 3272 | 3372 | 8.24890997085 |               |
| NM_002224    | ITPR3    | 1304 | 1426 | 7.83387247157 |               |
| NM_002224    | ITPR3    | 712  | 926  | 9.05626489291 |               |
| NM_002224    | ITPR3    | 7043 | 7168 | 8.57083806574 |               |
| NM_002224    | ITPR3    | 5976 | 6038 | 6.2489099633  |               |
| NM_002224    | ITPR3    | 4117 | 4299 | 8.57083806574 |               |
| NM_002224    | ITPR3    | 8419 | 8564 | 8.57083806574 |               |
| NM_002555    | SLC22A18 |      | 494  | 529           | 10.0938168645 |
| NM_002555    | SLC22A18 |      | 883  | 950           | 11.0938235954 |
| NM_002555    | SLC22A18 |      | 1039 | 1132          | 11.6787860963 |
| NM_002555    | SLC22A18 |      | 260  | 446           | 12.4157516905 |
| NM_002555    | SLC22A18 |      | 1176 | 1369          | 13.0938235956 |
| NM_001166133 | FRAS1    | 1297 | 1382 | 7.54695567641 |               |
| NM_001166133 | FRAS1    | 3621 | 3707 | 9.13191817691 |               |
| NM_001166133 | FRAS1    | 684  | 732  | 7.46281646702 |               |
| NM_001166133 | FRAS1    | 2835 | 2902 | 8.54293807623 |               |
| NM_001166133 | FRAS1    | 1466 | 1519 | 7.54695567619 |               |
| NM_001166133 | FRAS1    | 449  | 496  | 7.54678192609 |               |



|              |       |      |      |                |
|--------------|-------|------|------|----------------|
| NM_001166133 | FRAS1 | 2423 | 2528 | 9.54695567641  |
| NM_001166133 | FRAS1 | 2324 | 2413 | 7.54293807623  |
| NM_001166133 | FRAS1 | 1687 | 1765 | 7.54694894535  |
| NM_001166133 | FRAS1 | 3153 | 3213 | 7.54293807623  |
| NM_001166133 | FRAS1 | 91   | 168  | 8.5469556764   |
| NM_001004060 | NOM02 | 776  | 852  | 5.96071331005  |
| NM_001004060 | NOM02 | 663  | 771  | 6.59814323066  |
| NM_001004060 | NOM02 | 2998 | 3736 | 9.23373180445  |
| NM_001004060 | NOM02 | 2741 | 2975 | 7.69767890421  |
| NM_001004060 | NOM02 | 125  | 659  | 8.98061286748  |
| NM_001004060 | NOM02 | 2235 | 2740 | 8.43464449838  |
| NM_001004060 | NOM02 | 3741 | 3879 | 6.49122802674  |
| NM_001004060 | NOM02 | 854  | 2226 | 10.4274129291  |
| NM_001004067 | NOM03 | 726  | 905  | 7.62655407261  |
| NM_001004067 | NOM03 | 2804 | 3032 | 7.72608974617  |
| NM_001004067 | NOM03 | 2346 | 2803 | 8.46305534033  |
| NM_001004067 | NOM03 | 3061 | 3833 | 9.40416165128  |
| NM_001004067 | NOM03 | 188  | 722  | 9.00902370944  |
| NM_001004067 | NOM03 | 3867 | 4273 | 8.60055886408  |
| NM_001004067 | NOM03 | 1391 | 2289 | 9.86359326992  |
| NM_001004067 | NOM03 | 917  | 1388 | 8.67718014568  |
| NM_001039465 | SRSF5 | 733  | 808  | 2.67261573127  |
| NM_001039465 | SRSF5 | 935  | 1003 | 0.668598131101 |
| NM_001039465 | SRSF5 | 846  | 925  | 1.67261573127  |
| NM_001039465 | SRSF5 | 1218 | 1309 | 2.257578232    |
| NM_001039465 | SRSF5 | 502  | 711  | 3.47997065333  |
| NM_001039465 | SRSF5 | 1006 | 1104 | 1.67261573127  |
| NM_001039465 | SRSF5 | 1328 | 1430 | 1.67261573127  |
| NM_001039465 | SRSF5 | 259  | 502  | 3.67261573127  |
| NM_001039465 | SRSF5 | 1469 | 1549 | 2.25757822445  |
| NM_005689    | ABCB6 | 1355 | 1407 | 6.02934344506  |
| NM_005689    | ABCB6 | 870  | 939  | 7.02934344505  |
| NM_005689    | ABCB6 | 2208 | 2278 | 6.02934344506  |
| NM_005689    | ABCB6 | 1722 | 1756 | 6.44036334416  |
| NM_005689    | ABCB6 | 2301 | 2353 | 6.02916969474  |
| NM_005689    | ABCB6 | 2363 | 2409 | 5.36024173495  |
| NM_005689    | ABCB6 | 1757 | 1798 | 4.44420719402  |
| NM_005689    | ABCB6 | 750  | 840  | 7.61430594578  |
| NM_005689    | ABCB6 | 646  | 708  | 5.44438094411  |
| NM_005689    | ABCB6 | 962  | 1009 | 5.44438093678  |
| NM_005689    | ABCB6 | 1407 | 1504 | 5.44438094433  |
| NM_005689    | ABCB6 | 1613 | 1712 | 7.44438094433  |
| NM_005689    | ABCB6 | 1806 | 2059 | 8.35127153994  |
| NM_005689    | ABCB6 | 1504 | 1606 | 5.44438094433  |
| NM_005689    | ABCB6 | 2073 | 2184 | 6.76630903922  |
| NM_005689    | ABCB6 | 292  | 465  | 7.90381256297  |
| NM_005689    | ABCB6 | 1100 | 1252 | 7.76630903922  |
| NM_005689    | ABCB6 | 2412 | 2506 | 4.44438070842  |
| NM_005689    | ABCB6 | 2641 | 2884 | 7.61430594578  |
| NM_005689    | ABCB6 | 487  | 563  | 5.44438094433  |

|              |         |      |      |               |
|--------------|---------|------|------|---------------|
| NM_005686    | SOX13   | 3263 | 3322 | 6.6640933887  |
| NM_005686    | SOX13   | 2925 | 2996 | 7.66410011221 |
| NM_005686    | SOX13   | 3909 | 3977 | 7.66409988384 |
| NM_005686    | SOX13   | 3158 | 3262 | 9.24906262048 |
| NM_005687    | FARSB   | 225  | 319  | 7.75660653857 |
| NM_005687    | FARSB   | 1797 | 1840 | 6.7525889384  |
| NM_005687    | FARSB   | 1519 | 1632 | 7.17164380193 |
| NM_005687    | FARSB   | 1432 | 1492 | 7.75659980751 |
| NM_005687    | FARSB   | 84   | 158  | 5.1716440303  |
| NM_005687    | FARSB   | 429  | 543  | 6.17164403785 |
| NM_005687    | FARSB   | 1053 | 1108 | 6.08750482846 |
| NM_005687    | FARSB   | 1278 | 1341 | 6.17163730679 |
| NM_005687    | FARSB   | 1116 | 1257 | 8.34156903929 |
| NM_005680    | TAF1B   | 854  | 907  | 9.20504770835 |
| NM_005680    | TAF1B   | 1507 | 1569 | 8.62007848412 |
| NM_005680    | TAF1B   | 783  | 824  | 7.53594600579 |
| NM_005680    | TAF1B   | 299  | 358  | 8.53594600579 |
| NM_005680    | TAF1B   | 1060 | 1190 | 10.6200852152 |
| NM_033109    | PNPT1   | 1823 | 1883 | 5.81786128429 |
| NM_033109    | PNPT1   | 1642 | 1720 | 6.81785478916 |
| NM_033109    | PNPT1   | 2248 | 2339 | 6.81786128429 |
| NM_033109    | PNPT1   | 1969 | 2048 | 5.81785478916 |
| NM_001130009 | GEN1    | 1877 | 1930 | 8.42553538346 |
| NM_018056    | TMEM39B | 1337 | 1379 | 11.0450701741 |
| NM_018056    | TMEM39B | 1419 | 1485 | 11.0450701814 |
| NM_018056    | TMEM39B | 1076 | 1123 | 11.0450634506 |
| NM_018056    | TMEM39B | 698  | 814  | 11.0450701816 |
| NM_018050    | MANSC1  | 1707 | 1776 | 9.16632001638 |
| NM_018050    | MANSC1  | 537  | 617  | 8.58135751567 |
| NM_018050    | MANSC1  | 875  | 942  | 8.58135078462 |
| NM_018050    | MANSC1  | 1095 | 1287 | 10.1663200164 |
| NM_018050    | MANSC1  | 249  | 300  | 8.58135750812 |
| NM_018050    | MANSC1  | 748  | 848  | 9.16632001639 |
| NM_018050    | MANSC1  | 1423 | 1592 | 11.0407891343 |
| NM_018050    | MANSC1  | 429  | 521  | 10.3887124377 |
| NM_018050    | MANSC1  | 1843 | 1939 | 7.58135751567 |
| NM_018053    | XKR8    | 2044 | 2103 | 12.0913139265 |
| NM_018053    | XKR8    | 539  | 595  | 10.4222122164 |
| NM_018053    | XKR8    | 655  | 735  | 11.5063514258 |
| NM_018052    | VAC14   | 2103 | 2166 | 8.67576700166 |
| NM_018052    | VAC14   | 840  | 889  | 7.59162779249 |
| NM_018052    | VAC14   | 896  | 938  | 6.59162779249 |
| NM_018052    | VAC14   | 2027 | 2097 | 6.67576700188 |
| NM_018052    | VAC14   | 1788 | 1811 | 7.59162779249 |
| NM_018052    | VAC14   | 1480 | 1653 | 9.48312192394 |
| NM_018052    | VAC14   | 715  | 774  | 7.67576700187 |
| NM_033102    | SLC45A3 | 758  | 817  | 10.7984317551 |
| NM_033103    | RHPN2   | 1450 | 1497 | 5.95910988047 |
| NM_033103    | RHPN2   | 2154 | 2197 | 5.29018192069 |
| NM_033103    | RHPN2   | 1883 | 1975 | 4.37432089415 |

|              |       |      |      |               |
|--------------|-------|------|------|---------------|
| NM_033103    | RHPN2 | 528  | 575  | 4.29018192069 |
| NM_033103    | RHPN2 | 839  | 913  | 4.29018192069 |
| NM_033103    | RHPN2 | 2921 | 3033 | 4.37432113007 |
| NM_033103    | RHPN2 | 1735 | 1865 | 6.37432113007 |
| NM_033103    | RHPN2 | 386  | 467  | 5.95928363079 |
| NM_033103    | RHPN2 | 608  | 688  | 6.3703035299  |
| NM_033104    | STON2 | 7672 | 7741 | 11.9234382418 |
| NM_033104    | STON2 | 7957 | 8021 | 11.9234384777 |
| NM_033104    | STON2 | 1461 | 1524 | 12.9232647274 |
| NM_001130006 | GSPT1 | 4342 | 4398 | 2.18897910009 |
| NM_001130006 | GSPT1 | 247  | 297  | 3.18898583114 |
| NM_001130006 | GSPT1 | 5476 | 5554 | 3.18898583114 |
| NM_001130006 | GSPT1 | 302  | 371  | 3.77394833186 |
| NM_001130006 | GSPT1 | 2500 | 2557 | 4.18898583114 |
| NM_001130006 | GSPT1 | 584  | 678  | 4.18898583114 |
| NM_001130006 | GSPT1 | 5703 | 5755 | 3.18881208083 |
| NM_001130006 | GSPT1 | 1302 | 1400 | 4.51091392603 |
| NM_001130006 | GSPT1 | 5147 | 5183 | 2.10484662176 |
| NM_001130006 | GSPT1 | 3397 | 3449 | 2.18898582359 |
| NM_001130006 | GSPT1 | 2899 | 2942 | 2.18897910009 |
| NM_001130006 | GSPT1 | 6813 | 6872 | 2.18881208083 |
| NM_001130006 | GSPT1 | 4130 | 4176 | 3.77394160081 |
| NM_001130006 | GSPT1 | 6050 | 6133 | 2.18898583114 |
| NM_001130006 | GSPT1 | 5059 | 5099 | 2.18898559522 |
| NM_001130006 | GSPT1 | 52   | 244  | 5.35891083259 |
| NM_001130006 | GSPT1 | 3468 | 3577 | 4.18898583114 |
| NM_001130006 | GSPT1 | 2105 | 2263 | 5.77394833186 |
| NM_001130006 | GSPT1 | 4668 | 4744 | 4.18898583114 |
| NM_001130006 | GSPT1 | 4035 | 4086 | 3.18496823097 |
| NM_001130006 | GSPT1 | 2300 | 2442 | 6.7125477872  |
| NM_001130006 | GSPT1 | 1128 | 1284 | 5.77394833186 |
| NM_001130006 | GSPT1 | 417  | 493  | 2.18898583092 |
| NM_001130006 | GSPT1 | 867  | 1111 | 6.7125477872  |
| NM_001130006 | GSPT1 | 4774 | 4854 | 3.18898583114 |
| NM_001130006 | GSPT1 | 5264 | 5341 | 4.18898582359 |
| NM_001130006 | GSPT1 | 3726 | 3788 | 3.18898583114 |
| NM_001130006 | GSPT1 | 1404 | 2074 | 8.59837676728 |
| NM_001130005 | ACTN1 | 2446 | 2544 | 5.68069704968 |
| NM_001130005 | ACTN1 | 738  | 771  | 4.01159533958 |
| NM_001130005 | ACTN1 | 789  | 1023 | 7.5551661676  |
| NM_001130005 | ACTN1 | 3273 | 3314 | 3.09171694879 |
| NM_001130005 | ACTN1 | 1991 | 2069 | 5.41766264385 |
| NM_001130005 | ACTN1 | 1087 | 1344 | 6.68069704968 |
| NM_001130005 | ACTN1 | 3336 | 3453 | 6.68069704968 |
| NM_001130005 | ACTN1 | 2105 | 2175 | 5.68069704968 |
| NM_001130005 | ACTN1 | 2268 | 2357 | 3.09573454896 |
| NM_001130005 | ACTN1 | 283  | 527  | 6.5551661676  |
| NM_001130005 | ACTN1 | 1612 | 1971 | 7.48805197174 |
| NM_001130005 | ACTN1 | 2657 | 2850 | 5.09573454896 |
| NM_001130005 | ACTN1 | 528  | 718  | 6.26565955041 |

|              |         |       |       |               |
|--------------|---------|-------|-------|---------------|
| NM_001130005 | ACTN1   | 1354  | 1612  | 6.68069704968 |
| NM_001130005 | ACTN1   | 2853  | 2961  | 3.09573454896 |
| NM_033107    | GTPBP10 | 786   | 843   | 8.96230940726 |
| NM_004326    | BCL9    | 3396  | 3465  | 8.78895777795 |
| NM_004326    | BCL9    | 5152  | 5196  | 9.784940178   |
| NM_004326    | BCL9    | 5250  | 5302  | 8.78895104712 |
| NM_025256    | EHMT2   | 2427  | 2479  | 7.51100843399 |
| NM_025256    | EHMT2   | 3189  | 3240  | 6.42687595566 |
| NM_025256    | EHMT2   | 869   | 921   | 6.51100843399 |
| NM_025256    | EHMT2   | 1480  | 1558  | 8.09597766576 |
| NM_025256    | EHMT2   | 2589  | 2660  | 7.50699756487 |
| NM_025256    | EHMT2   | 2741  | 2825  | 7.51101492912 |
| NM_025256    | EHMT2   | 3799  | 3859  | 6.51100843399 |
| NM_025256    | EHMT2   | 2993  | 3068  | 7.51101516504 |
| NM_025256    | EHMT2   | 3353  | 3461  | 8.09597766576 |
| NM_001142350 | THOC6   | 1161  | 1227  | 8.01562060449 |
| NM_001142350 | THOC6   | 430   | 477   | 8.0154468544  |
| NM_001142350 | THOC6   | 683   | 782   | 9.01562060472 |
| NM_004320    | ATP2A1  | 2047  | 2076  | 8.63240669306 |
| NM_001142355 | NIF3L1  | 596   | 643   | 5.05719832584 |
| NM_001142355 | NIF3L1  | 775   | 831   | 6.05737184024 |
| NM_001142355 | NIF3L1  | 190   | 244   | 6.64233456933 |
| NM_001142355 | NIF3L1  | 657   | 740   | 6.05719832584 |
| NM_001142355 | NIF3L1  | 989   | 1114  | 7.37930017105 |
| NM_001142355 | NIF3L1  | 90    | 190   | 6.05736534511 |
| NM_033362    | MRPS12  | 942   | 1026  | 7.918398797   |
| NM_033362    | MRPS12  | 366   | 436   | 5.91839879678 |
| NM_033362    | MRPS12  | 684   | 778   | 6.91839879678 |
| NM_134442    | CREB1   | 142   | 228   | 7.90816816356 |
| NM_079834    | SCAMP4  | 552   | 622   | 8.05322886996 |
| NM_079834    | SCAMP4  | 2267  | 2309  | 5.96908966058 |
| NM_079834    | SCAMP4  | 2049  | 2193  | 9.2231538714  |
| NM_079834    | SCAMP4  | 925   | 1005  | 7.05322886996 |
| NM_079834    | SCAMP4  | 85    | 265   | 9.2231538714  |
| NM_079834    | SCAMP4  | 266   | 524   | 10.3011563834 |
| NM_079834    | SCAMP4  | 1006  | 1100  | 7.63819137046 |
| NM_079834    | SCAMP4  | 628   | 702   | 7.05322886996 |
| NM_014911    | AAK1    | 20462 | 20502 | 9.27285588655 |
| NM_014911    | AAK1    | 18039 | 18099 | 8.27302290582 |
| NM_014911    | AAK1    | 2600  | 2659  | 8.27302962932 |
| NM_014911    | AAK1    | 870   | 915   | 8.27285588655 |
| NM_014911    | AAK1    | 14447 | 14504 | 8.27302940095 |
| NM_014911    | AAK1    | 16011 | 16062 | 9.18889042749 |
| NM_014911    | AAK1    | 1457  | 1507  | 10.2730229058 |
| NM_014911    | AAK1    | 1352  | 1410  | 8.18889042749 |
| NM_005028    | PIP4K2A | 1655  | 1707  | 7.82568800444 |
| NM_005028    | PIP4K2A | 633   | 700   | 8.82970560462 |
| NM_005028    | PIP4K2A | 1455  | 1535  | 8.82969887356 |
| NM_005028    | PIP4K2A | 1024  | 1139  | 8.8297056044  |
| NM_014913    | ADNP2   | 1418  | 1480  | 9.15737263784 |

|           |       |      |      |               |
|-----------|-------|------|------|---------------|
| NM_014913 | ADNP2 | 2223 | 2271 | 8.48827093528 |
| NM_014913 | ADNP2 | 726  | 808  | 9.15719889507 |
| NM_014913 | ADNP2 | 507  | 587  | 8.48827093528 |
| NM_014913 | ADNP2 | 4482 | 4552 | 7.57240341361 |
| NM_014913 | ADNP2 | 2507 | 2596 | 8.57240341361 |
| NM_014913 | ADNP2 | 653  | 706  | 8.56839254449 |
| NM_014913 | ADNP2 | 2669 | 2732 | 9.57241014466 |
| NM_014913 | ADNP2 | 444  | 502  | 9.48827093528 |
| NM_014913 | ADNP2 | 1596 | 1659 | 9.15335504521 |
| NM_014913 | ADNP2 | 1163 | 1241 | 9.15737264516 |
| NM_014916 | LMTK2 | 466  | 553  | 10.4613914688 |
| NM_014916 | LMTK2 | 711  | 760  | 9.61339456225 |
| NM_014916 | LMTK2 | 1269 | 1370 | 10.4613914688 |
| NM_014916 | LMTK2 | 88   | 177  | 10.2914664674 |
| NM_014916 | LMTK2 | 1539 | 1589 | 7.29146646736 |
| NM_014916 | LMTK2 | 411  | 448  | 8.20732725797 |
| NM_014916 | LMTK2 | 7723 | 7759 | 8.28744886719 |
| NM_014916 | LMTK2 | 3757 | 3815 | 8.87642896807 |
| NM_014916 | LMTK2 | 3302 | 3352 | 9.87642896808 |
| NM_014916 | LMTK2 | 2742 | 2802 | 7.29146646736 |
| NM_014916 | LMTK2 | 8052 | 8135 | 8.87642223703 |
| NM_014916 | LMTK2 | 8555 | 8643 | 8.29146646736 |
| NM_014916 | LMTK2 | 788  | 859  | 8.87642873216 |
| NM_014916 | LMTK2 | 2483 | 2641 | 10.750898086  |
| NM_014916 | LMTK2 | 8209 | 8278 | 8.29146646736 |
| NM_014916 | LMTK2 | 2236 | 2305 | 8.29146646736 |
| NM_014916 | LMTK2 | 6691 | 6781 | 8.87241136791 |
| NM_014916 | LMTK2 | 876  | 979  | 10.9919061855 |
| NM_014916 | LMTK2 | 2193 | 2229 | 7.28744886719 |
| NM_014916 | LMTK2 | 1375 | 1534 | 10.4613914688 |
| NM_014916 | LMTK2 | 4730 | 4821 | 7.29146646736 |
| NM_014916 | LMTK2 | 8174 | 8206 | 7.29129271704 |
| NM_014916 | LMTK2 | 3566 | 3645 | 9.29146646736 |
| NM_014916 | LMTK2 | 3055 | 3169 | 9.29146646736 |
| NM_014916 | LMTK2 | 6132 | 6185 | 8.29146646714 |
| NM_014916 | LMTK2 | 7352 | 7415 | 9.29146646714 |
| NM_014916 | LMTK2 | 4577 | 4659 | 7.29145973631 |
| NM_014916 | LMTK2 | 327  | 386  | 9.29129271704 |
| NM_014916 | LMTK2 | 5951 | 6007 | 7.28744886719 |
| NM_014916 | LMTK2 | 2829 | 2931 | 9.87642896808 |
| NM_014916 | LMTK2 | 4106 | 4203 | 8.29146646736 |
| NM_014916 | LMTK2 | 2964 | 3038 | 8.87241136791 |
| NM_014916 | LMTK2 | 7021 | 7065 | 7.29145973631 |
| NM_014916 | LMTK2 | 2320 | 2430 | 9.29146646736 |
| NM_014916 | LMTK2 | 7762 | 7810 | 8.29146623144 |
| NM_014916 | LMTK2 | 3169 | 3297 | 9.61339456225 |
| NM_014916 | LMTK2 | 5563 | 5612 | 8.29146623144 |
| NM_014916 | LMTK2 | 7068 | 7140 | 9.61339456225 |
| NM_014916 | LMTK2 | 5247 | 5341 | 8.87642896808 |
| NM_014916 | LMTK2 | 1926 | 2110 | 9.61339456225 |

|           |        |      |      |               |
|-----------|--------|------|------|---------------|
| NM_014916 | LMTK2  | 1591 | 1735 | 9.61339456225 |
| NM_014916 | LMTK2  | 5377 | 5533 | 11.198357063  |
| NM_014916 | LMTK2  | 6919 | 7001 | 8.29146646735 |
| NM_014916 | LMTK2  | 1044 | 1267 | 11.2914664674 |
| NM_014916 | LMTK2  | 4262 | 4359 | 8.29146646736 |
| NM_014916 | LMTK2  | 3376 | 3480 | 8.29146646736 |
| NM_014916 | LMTK2  | 2121 | 2192 | 7.28744886719 |
| NM_014916 | LMTK2  | 6043 | 6119 | 8.29146646714 |
| NM_014916 | LMTK2  | 6795 | 6918 | 9.87642896808 |
| NM_014916 | LMTK2  | 3865 | 4025 | 9.61339456225 |
| NM_005022 | PFN1   | 347  | 388  | 2.50154791565 |
| NM_005022 | PFN1   | 161  | 212  | 2.58166952486 |
| NM_005022 | PFN1   | 569  | 1328 | 9.04511874367 |
| NM_005023 | PGGT1B | 528  | 578  | 8.5282711562  |
| NM_005023 | PGGT1B | 173  | 231  | 6.53228874882 |
| NM_005023 | PGGT1B | 981  | 1044 | 6.44814954699 |
| NM_005027 | PIK3R2 | 3176 | 3228 | 4.61725098586 |
| NM_005027 | PIK3R2 | 2825 | 2871 | 6.61725098586 |
| NM_005027 | PIK3R2 | 2872 | 2976 | 6.93917908075 |
| NM_005027 | PIK3R2 | 2328 | 2393 | 4.61725098585 |
| NM_005027 | PIK3R2 | 2082 | 2132 | 4.61725098586 |
| NM_005027 | PIK3R2 | 1996 | 2041 | 4.61707723554 |
| NM_005027 | PIK3R2 | 902  | 989  | 6.20221348658 |
| NM_005027 | PIK3R2 | 1723 | 1873 | 4.61725098586 |
| NM_005027 | PIK3R2 | 222  | 413  | 5.61725098586 |
| NM_005027 | PIK3R2 | 3740 | 3894 | 7.20221348658 |
| NM_005027 | PIK3R2 | 989  | 1066 | 5.61725098586 |
| NM_005027 | PIK3R2 | 1892 | 1989 | 5.61725098586 |
| NM_005027 | PIK3R2 | 1607 | 1687 | 5.61725074994 |
| NM_002076 | GNS    | 310  | 367  | 7.2592594031  |
| NM_002076 | GNS    | 2614 | 2685 | 6.2592594031  |
| NM_002076 | GNS    | 614  | 710  | 7.84422190382 |
| NM_002076 | GNS    | 2298 | 2385 | 5.67429690237 |
| NM_002076 | GNS    | 3698 | 3772 | 7.48165182444 |
| NM_002076 | GNS    | 4275 | 4332 | 4.67429690238 |
| NM_002076 | GNS    | 3814 | 3876 | 5.67429690238 |
| NM_002076 | GNS    | 1281 | 1343 | 7.84422190382 |
| NM_002076 | GNS    | 2717 | 2772 | 4.67429017133 |
| NM_002076 | GNS    | 4403 | 4501 | 5.67429690238 |
| NM_002076 | GNS    | 470  | 601  | 7.84422190382 |
| NM_002076 | GNS    | 68   | 208  | 7.48165182444 |
| NM_002076 | GNS    | 732  | 1021 | 9.88375026801 |
| NM_002076 | GNS    | 4950 | 5096 | 7.48165182444 |
| NM_002076 | GNS    | 1026 | 1274 | 9.53227789751 |
| NM_002076 | GNS    | 1425 | 1751 | 9.99622499727 |
| NM_002076 | GNS    | 1366 | 1395 | 4.67027930221 |
| NM_002076 | GNS    | 2799 | 2876 | 6.2592594031  |
| NM_002076 | GNS    | 1759 | 2167 | 10.1661499987 |
| NM_002076 | GNS    | 3978 | 4197 | 8.2592594031  |
| NM_002076 | GNS    | 369  | 469  | 6.99622499727 |

|              |           |      |      |               |               |
|--------------|-----------|------|------|---------------|---------------|
| NM_002076    | GNS       | 2169 | 2283 | 6.2592594031  |               |
| NM_002076    | GNS       | 2419 | 2543 | 7.67429690238 |               |
| NM_002076    | GNS       | 3486 | 3568 | 6.25524180293 |               |
| NM_001005335 | HNRNPL    | 892  | 1040 | 7.02289188314 |               |
| NM_001005335 | HNRNPL    | 1654 | 1766 | 6.26389998265 |               |
| NM_001005335 | HNRNPL    | 712  | 812  | 3.56346026451 |               |
| NM_001005335 | HNRNPL    | 44   | 679  | 9.20731645428 |               |
| NM_001005335 | HNRNPL    | 1771 | 1879 | 4.14842276523 |               |
| NM_001005335 | HNRNPL    | 1041 | 1646 | 8.86724101268 |               |
| NM_001185094 | NIT1      | 369  | 437  | 6.64090504428 |               |
| NM_001185094 | NIT1      | 141  | 195  | 8.14574593579 |               |
| NM_177401    | MIDN      | 893  | 940  | 6.40806213748 |               |
| NM_177401    | MIDN      | 2245 | 2293 | 6.40806213748 |               |
| NM_177401    | MIDN      | 960  | 1010 | 7.40806213748 |               |
| NM_177401    | MIDN      | 1419 | 1467 | 7.40823588024 |               |
| NM_177401    | MIDN      | 3103 | 3162 | 7.32409667841 |               |
| NM_177401    | MIDN      | 3522 | 3574 | 7.40823565188 |               |
| NM_177401    | MIDN      | 2725 | 2869 | 9.57816088924 |               |
| NM_177401    | MIDN      | 2070 | 2235 | 9.40823588779 |               |
| NM_177401    | MIDN      | 3167 | 3271 | 8.73016398268 |               |
| NM_177401    | MIDN      | 332  | 413  | 6.40823565188 |               |
| NM_013232    | PDCD6     | 953  | 994  | 5.62014648411 |               |
| NM_013232    | PDCD6     | 774  | 917  | 7.62416408428 |               |
| NM_013232    | PDCD6     | 559  | 709  | 7.84655650562 |               |
| NM_013232    | PDCD6     | 145  | 251  | 6.84655650562 |               |
| NM_013232    | PDCD6     | 274  | 367  | 6.84655650562 |               |
| NM_013232    | PDCD6     | 374  | 493  | 6.36112967845 |               |
| NM_001002814 | RAB11FIP1 |      | 1788 | 1863          | 7.56040818827 |
| NM_001002814 | RAB11FIP1 |      | 6556 | 6604          | 7.55639082402 |
| NM_001002814 | RAB11FIP1 |      | 1548 | 1635          | 7.56040842397 |
| NM_001002814 | RAB11FIP1 |      | 6712 | 6784          | 7.56040841664 |
| NM_001002814 | RAB11FIP1 |      | 738  | 796           | 7.56040818827 |
| NM_001002814 | RAB11FIP1 |      | 1477 | 1530          | 8.56040818827 |
| NM_001002814 | RAB11FIP1 |      | 970  | 1037          | 7.55639082402 |
| NM_001002814 | RAB11FIP1 |      | 537  | 590           | 8.56023467387 |
| NM_001002814 | RAB11FIP1 |      | 5478 | 5558          | 9.56040842418 |
| NM_001002814 | RAB11FIP1 |      | 5062 | 5114          | 7.56040169314 |
| NM_001002811 | PDE4DIP   | 2883 | 2969 | 8.06288794064 |               |
| NM_001002811 | PDE4DIP   | 3397 | 3437 | 7.39378623053 |               |
| NM_001002811 | PDE4DIP   | 3529 | 3614 | 7.47792543237 |               |
| NM_001206977 | NR1H4     | 459  | 513  | 4.03678290322 |               |
| NM_001206977 | NR1H4     | 108  | 155  | 4.12074836228 |               |
| NM_001206977 | NR1H4     | 1531 | 1613 | 6.1209221126  |               |
| NM_001206977 | NR1H4     | 2115 | 2158 | 5.12092210505 |               |
| NM_001206977 | NR1H4     | 517  | 582  | 5.7058846131  |               |
| NM_001206977 | NR1H4     | 1756 | 1814 | 4.12091538155 |               |
| NM_001206977 | NR1H4     | 1943 | 2037 | 6.1209221126  |               |
| NM_001206977 | NR1H4     | 1114 | 1225 | 5.70588461332 |               |
| NM_001206977 | NR1H4     | 1005 | 1054 | 4.1209221126  |               |
| NM_001206977 | NR1H4     | 626  | 682  | 4.11690451243 |               |

|              |          |      |      |                   |
|--------------|----------|------|------|-------------------|
| NM_001206977 | NR1H4    | 1617 | 1742 | 7.1209221126      |
| NM_001853    | COL9A3   | 2016 | 2097 | 7.47546597446     |
| NM_001853    | COL9A3   | 398  | 518  | 6.89050347374     |
| NM_001853    | COL9A3   | 1706 | 1772 | 7.47546597446     |
| NM_001853    | COL9A3   | 205  | 324  | 8.89050347374     |
| NM_001853    | COL9A3   | 2098 | 2140 | 5.89050323782     |
| NM_001853    | COL9A3   | 681  | 745  | 5.89050347374     |
| NM_001853    | COL9A3   | 2207 | 2268 | 5.88648587357     |
| NM_001853    | COL9A3   | 1322 | 1376 | 7.47546597424     |
| NM_001853    | COL9A3   | 1861 | 1921 | 5.88648587357     |
| NM_001853    | COL9A3   | 131  | 188  | 5.89050346619     |
| NM_001853    | COL9A3   | 2302 | 2454 | 7.89050347374     |
| NM_001853    | COL9A3   | 1572 | 1650 | 6.89050347374     |
| NM_001853    | COL9A3   | 905  | 1081 | 7.47546597446     |
| NM_001852    | COL9A2   | 2075 | 2133 | 7.51523346558     |
| NM_001852    | COL9A2   | 2562 | 2627 | 7.51540721589     |
| NM_001171628 | VEGFA    | 1513 | 1591 | 2.81762355381     |
| NM_001171628 | VEGFA    | 2012 | 2046 | 2.81761682298     |
| NM_001171628 | VEGFA    | 1594 | 1662 | 3.81762355403     |
| NM_001171628 | VEGFA    | 632  | 680  | 2.81360595386     |
| NM_001171628 | VEGFA    | 1753 | 1826 | 4.4025860472      |
| NM_001171628 | VEGFA    | 182  | 217  | 4.40258605474     |
| NM_001171628 | VEGFA    | 1933 | 1988 | 4.4025793237      |
| NM_001171628 | VEGFA    | 10   | 49   | 2.81360595386     |
| NM_001171628 | VEGFA    | 2791 | 2937 | 6.40258605475     |
| NM_001171628 | VEGFA    | 1176 | 1246 | 4.4025793237      |
| NM_001171628 | VEGFA    | 3203 | 3268 | 3.81762355403     |
| NM_001171628 | VEGFA    | 234  | 345  | 4.40258605475     |
| NM_001859    | SLC31A1  | 2605 | 2658 | 5.48827154005     |
| NM_001859    | SLC31A1  | 512  | 580  | 7.07725164094     |
| NM_001859    | SLC31A1  | 3770 | 3839 | 6.49228914022     |
| NM_001859    | SLC31A1  | 2659 | 2700 | 6.99311243156     |
| NM_001859    | SLC31A1  | 753  | 849  | 8.29964406228     |
| NM_001859    | SLC31A1  | 1051 | 1121 | 7.07725164094     |
| NM_001859    | SLC31A1  | 304  | 421  | 9.39917973583     |
| NM_001859    | SLC31A1  | 2811 | 2861 | 5.49228240917     |
| NM_001859    | SLC31A1  | 105  | 192  | 8.29964406228     |
| NM_206866    | BACH1    | 230  | 263  | 5.7426534821      |
| NM_206866    | BACH1    | 2520 | 2569 | 6.73880963225     |
| NM_206866    | BACH1    | 4217 | 4245 | 5.65868802304     |
| NM_206860    | TACC2    | 3562 | 3614 | 5.61987818259     |
| NM_206860    | TACC2    | 3812 | 3871 | 5.61987818259     |
| NM_206860    | TACC2    | 3435 | 3491 | 6.6999997918      |
| NM_206860    | TACC2    | 822  | 890  | 5.6999997918      |
| NM_153261    | TMEM188  | 1382 | 1429 | 8.14162939649     |
| NM_004649    | C21orf33 |      | 491  | 573 5.56540686682 |
| NM_004645    | COIL     | 1080 | 1143 | 6.65838399615     |
| NM_004645    | COIL     | 859  | 929  | 6.6624015961      |
| NM_004311    | ARL3     | 728  | 791  | 6.02469160957     |
| NM_001145    | ANG      | 532  | 693  | 6.44055390495     |



|              |             |      |      |                    |
|--------------|-------------|------|------|--------------------|
| NM_001144    | AMFR        | 739  | 828  | 6.56727407636      |
| NM_001144    | AMFR        | 2176 | 2221 | 4.98231157564      |
| NM_001144    | AMFR        | 2564 | 2648 | 6.98231157564      |
| NM_001144    | AMFR        | 3054 | 3145 | 5.98231156809      |
| NM_001144    | AMFR        | 1678 | 1762 | 7.98231157564      |
| NM_001144    | AMFR        | 597  | 731  | 8.98231157564      |
| NM_001144    | AMFR        | 2222 | 2253 | 5.98231157563      |
| NM_001144    | AMFR        | 1463 | 1517 | 5.98231157564      |
| NM_001144    | AMFR        | 2957 | 3026 | 6.56727406881      |
| NM_001144    | AMFR        | 841  | 1079 | 9.56727407636      |
| NM_001144    | AMFR        | 1190 | 1354 | 8.98231157564      |
| NM_001144    | AMFR        | 477  | 575  | 7.98231157564      |
| NM_001144    | AMFR        | 1369 | 1459 | 6.98231157564      |
| NM_001144    | AMFR        | 1610 | 1669 | 5.98231156809      |
| NM_001144    | AMFR        | 1090 | 1184 | 7.30423967053      |
| NM_001144    | AMFR        | 1781 | 1917 | 7.7896664977       |
| NM_001144    | AMFR        | 2254 | 2471 | 8.56727407636      |
| NM_001144    | AMFR        | 1937 | 2076 | 7.98231157564      |
| NM_001144    | AMFR        | 2763 | 2852 | 6.98231157564      |
| NM_004315    | ASAH1       | 2377 | 2452 | 3.86971699934      |
| NM_004315    | ASAH1       | 326  | 384  | 3.28476122212      |
| NM_004315    | ASAH1       | 1760 | 1833 | 3.86972373039      |
| NM_004315    | ASAH1       | 1932 | 2008 | 3.86570613022      |
| NM_004315    | ASAH1       | 1643 | 1760 | 5.7441928483       |
| NM_004315    | ASAH1       | 520  | 560  | 3.86570613022      |
| NM_004315    | ASAH1       | 826  | 1069 | 7.4942145953       |
| NM_004315    | ASAH1       | 1381 | 1611 | 6.86972373039      |
| NM_004315    | ASAH1       | 1844 | 1906 | 5.09211615173      |
| NM_004315    | ASAH1       | 581  | 812  | 6.28476122967      |
| NM_004315    | ASAH1       | 2198 | 2318 | 2.28476122967      |
| NM_004315    | ASAH1       | 1084 | 1375 | 7.41404424661      |
| NM_004315    | ASAH1       | 401  | 516  | 4.28476122967      |
| NM_004642    | CDK2AP1     | 701  | 750  | 5.91490311589      |
| NM_004642    | CDK2AP1     | 967  | 1035 | 5.32994061517      |
| NM_004642    | CDK2AP1     | 764  | 881  | 7.32994061517      |
| NM_004642    | CDK2AP1     | 1429 | 1546 | 5.91490311589      |
| NM_004642    | CDK2AP1     | 1046 | 1135 | 4.32994061517      |
| NM_004642    | CDK2AP1     | 1186 | 1322 | 6.91490311589      |
| NM_001201477 | NETO2       | 1568 | 1659 | 9.24479684702      |
| NM_001201479 | COR07-PAM16 |      | 3317 | 3354 8.65364214287 |
| NM_001201479 | COR07-PAM16 |      | 2612 | 2698 8.65380916213 |
| NM_032111    | MRPL14      | 559  | 681  | 3.52115218026      |
| NM_016185    | HN1         | 732  | 859  | 8.11169983711      |
| NM_016185    | HN1         | 219  | 259  | 4.94176810461      |
| NM_016185    | HN1         | 591  | 637  | 5.52673733638      |
| NM_016185    | HN1         | 1013 | 1067 | 5.52673060533      |
| NM_016185    | HN1         | 490  | 587  | 5.52673733639      |
| NM_016185    | HN1         | 367  | 468  | 5.94177483567      |
| NM_020733    | HEG1        | 2140 | 2220 | 8.23510873419      |
| NM_020733    | HEG1        | 4965 | 5020 | 8.23109786507      |

|           |         |      |      |               |
|-----------|---------|------|------|---------------|
| NM_020733 | HEG1    | 2588 | 2643 | 7.23510873419 |
| NM_020733 | HEG1    | 3459 | 3511 | 8.23511522933 |
| NM_020733 | HEG1    | 4092 | 4177 | 8.82007796574 |
| NM_020733 | HEG1    | 2768 | 2808 | 8.23109786507 |
| NM_020733 | HEG1    | 516  | 541  | 8.23109786507 |
| NM_020733 | HEG1    | 8351 | 8418 | 8.82007795842 |
| NM_020733 | HEG1    | 3227 | 3331 | 9.23511546502 |
| NM_020733 | HEG1    | 4405 | 4470 | 8.15097625586 |
| NM_016183 | MRT04   | 368  | 424  | 6.4205248513  |
| NM_016183 | MRT04   | 307  | 364  | 5.33638587784 |
| NM_017859 | UCKL1   | 699  | 765  | 3.87545742896 |
| NM_017854 | TMEM160 | 448  | 514  | 10.9233322686 |
| NM_017855 | ODAM    | 562  | 646  | 7.25854027698 |
| NM_017855 | ODAM    | 383  | 456  | 9.06589519904 |
| NM_017855 | ODAM    | 315  | 383  | 6.1744010676  |
| NM_017855 | ODAM    | 914  | 1061 | 9.58046837187 |
| NM_017855 | ODAM    | 1156 | 1279 | 8.58046837187 |
| NM_017855 | ODAM    | 683  | 913  | 10.258540277  |
| NM_017857 | SSH3    | 1188 | 1230 | 8.15966389383 |
| NM_017857 | SSH3    | 979  | 1054 | 9.24380310321 |
| NM_017857 | SSH3    | 602  | 663  | 8.24379637216 |
| NM_017857 | SSH3    | 2377 | 2445 | 8.24379637216 |
| NM_017857 | SSH3    | 859  | 949  | 8.24379637216 |
| NM_005721 | ACTR3   | 393  | 447  | 2.54191308579 |
| NM_005721 | ACTR3   | 1627 | 1711 | 5.8638414166  |
| NM_005721 | ACTR3   | 2161 | 2268 | 5.12687582243 |
| NM_005721 | ACTR3   | 1886 | 1966 | 4.12687581488 |
| NM_005721 | ACTR3   | 1459 | 1502 | 4.54191332149 |
| NM_005721 | ACTR3   | 1076 | 1122 | 4.12687582243 |
| NM_005721 | ACTR3   | 1724 | 1798 | 2.54191332171 |
| NM_005721 | ACTR3   | 1803 | 1877 | 3.54191332171 |
| NM_005721 | ACTR3   | 2269 | 2328 | 5.12687582243 |
| NM_005721 | ACTR3   | 322  | 393  | 4.54191332171 |
| NM_005721 | ACTR3   | 2438 | 2478 | 4.8638414166  |
| NM_005721 | ACTR3   | 1140 | 1205 | 6.00134494035 |
| NM_005721 | ACTR3   | 1209 | 1424 | 6.71183832315 |
| NM_005721 | ACTR3   | 473  | 542  | 4.12687582243 |
| NM_005721 | ACTR3   | 2568 | 2665 | 4.12687582243 |
| NM_005721 | ACTR3   | 557  | 775  | 7.24235303985 |
| NM_005721 | ACTR3   | 790  | 1022 | 6.71183832315 |
| NM_005721 | ACTR3   | 217  | 299  | 4.12687582243 |
| NM_005721 | ACTR3   | 1503 | 1593 | 5.34926824377 |
| NM_025029 | MZT2B   | 583  | 660  | 4.06468255397 |
| NM_025029 | MZT2B   | 438  | 579  | 7.38661064886 |
| NM_016458 | FAM203A | 762  | 793  | 7.75178815463 |
| NM_016458 | FAM203A | 830  | 928  | 8.83592712809 |
| NM_016320 | NUP98   | 528  | 585  | 7.85122286914 |
| NM_016320 | NUP98   | 771  | 828  | 7.26626037575 |
| NM_016320 | NUP98   | 4768 | 4825 | 7.26626037596 |
| NM_016320 | NUP98   | 4204 | 4294 | 7.26626037596 |

|           |       |      |      |               |
|-----------|-------|------|------|---------------|
| NM_016320 | NUP98 | 2440 | 2503 | 7.85122287669 |
| NM_016320 | NUP98 | 1878 | 1967 | 6.26626014005 |
| NM_016320 | NUP98 | 2876 | 2953 | 6.26626036842 |
| NM_016320 | NUP98 | 459  | 527  | 7.85122287669 |
| NM_016320 | NUP98 | 2201 | 2247 | 6.26626014005 |
| NM_016320 | NUP98 | 5899 | 5934 | 7.26625364492 |
| NM_016320 | NUP98 | 3008 | 3049 | 7.84720527652 |
| NM_016320 | NUP98 | 4537 | 4660 | 8.85122287669 |
| NM_016320 | NUP98 | 5093 | 5191 | 7.26626037597 |
| NM_016320 | NUP98 | 1168 | 1233 | 7.85122287647 |
| NM_016320 | NUP98 | 5309 | 5404 | 8.58818847086 |
| NM_016320 | NUP98 | 3265 | 3300 | 7.84720527652 |
| NM_016320 | NUP98 | 3540 | 3654 | 9.26626037597 |
| NM_016320 | NUP98 | 1429 | 1524 | 8.58818847086 |
| NM_016320 | NUP98 | 4690 | 4763 | 7.26626036842 |
| NM_016320 | NUP98 | 5755 | 5832 | 7.2622427758  |
| NM_016320 | NUP98 | 1612 | 1696 | 8.26626037597 |
| NM_016320 | NUP98 | 3745 | 3861 | 7.85122287669 |
| NM_016320 | NUP98 | 1339 | 1419 | 6.26608662565 |
| NM_016320 | NUP98 | 4830 | 4977 | 7.85122287669 |
| NM_016320 | NUP98 | 1237 | 1317 | 6.26626037597 |
| NM_016320 | NUP98 | 981  | 1034 | 7.26608662565 |
| NM_016320 | NUP98 | 5530 | 5615 | 6.26626037575 |
| NM_016320 | NUP98 | 644  | 743  | 7.85122287668 |
| NM_016320 | NUP98 | 6441 | 6541 | 7.26625364492 |
| NM_016322 | RAB14 | 1475 | 1549 | 5.05451973752 |
| NM_016322 | RAB14 | 3029 | 3071 | 4.97038052836 |
| NM_016322 | RAB14 | 3102 | 3153 | 6.63948223846 |
| NM_016322 | RAB14 | 284  | 344  | 4.05434598743 |
| NM_016322 | RAB14 | 2843 | 2887 | 5.63948200255 |
| NM_016322 | RAB14 | 975  | 1032 | 6.37644783263 |
| NM_016322 | RAB14 | 628  | 721  | 6.05451973774 |
| NM_016322 | RAB14 | 757  | 818  | 5.05451300669 |
| NM_016322 | RAB14 | 2221 | 2292 | 6.37644783241 |
| NM_016322 | RAB14 | 2024 | 2089 | 6.63948223846 |
| NM_016322 | RAB14 | 1075 | 1208 | 7.37644783263 |
| NM_016322 | RAB14 | 1372 | 1452 | 5.05451973774 |
| NM_016457 | PRKD2 | 414  | 460  | 9.13879108817 |
| NM_016457 | PRKD2 | 1186 | 1221 | 7.55767243731 |
| NM_016457 | PRKD2 | 667  | 709  | 7.47370697824 |
| NM_016457 | PRKD2 | 2330 | 2363 | 9.5578461874  |
| NM_016457 | PRKD2 | 244  | 291  | 7.5578461874  |
| NM_016457 | PRKD2 | 1972 | 2063 | 9.87977428251 |
| NM_016457 | PRKD2 | 2120 | 2172 | 7.55767243731 |
| NM_016457 | PRKD2 | 1408 | 1529 | 7.55784618762 |
| NM_016457 | PRKD2 | 2376 | 2420 | 8.47370697824 |
| NM_016457 | PRKD2 | 132  | 203  | 8.55784618008 |
| NM_016457 | PRKD2 | 2753 | 2853 | 9.87977428251 |
| NM_016457 | PRKD2 | 475  | 567  | 7.55784618762 |
| NM_016456 | TMEM9 | 1385 | 1458 | 5.16211651744 |

|           |        |      |      |               |
|-----------|--------|------|------|---------------|
| NM_016456 | TMEM9  | 799  | 930  | 8.62154813607 |
| NM_016456 | TMEM9  | 89   | 118  | 6.16194276712 |
| NM_016456 | TMEM9  | 450  | 525  | 7.16211651743 |
| NM_016456 | TMEM9  | 662  | 704  | 6.16211628152 |
| NM_016456 | TMEM9  | 1261 | 1345 | 7.16211651744 |
| NM_016456 | TMEM9  | 942  | 1012 | 5.16210978638 |
| NM_016456 | TMEM9  | 146  | 328  | 8.62154813607 |
| NM_016454 | TMEM85 | 501  | 569  | 7.49501573015 |
| NM_016454 | TMEM85 | 382  | 441  | 6.75805013598 |
| NM_016454 | TMEM85 | 703  | 858  | 8.17308763526 |
| NM_016454 | TMEM85 | 38   | 140  | 8.17308763526 |
| NM_016454 | TMEM85 | 175  | 326  | 7.75805013598 |
| NM_016454 | TMEM85 | 572  | 691  | 8.17308763526 |
| NM_024991 | SORBS1 | 3428 | 3472 | 5.54041267637 |
| NM_024991 | SORBS1 | 1644 | 1675 | 5.54425652622 |
| NM_024991 | SORBS1 | 2473 | 2538 | 5.54442354548 |
| NM_001689 | ATP5G3 | 2306 | 2366 | 4.60048312806 |
| NM_001689 | ATP5G3 | 169  | 228  | 3.01552062733 |
| NM_001689 | ATP5G3 | 57   | 96   | 2.01150302716 |
| NM_001689 | ATP5G3 | 245  | 398  | 5.71596034547 |
| NM_001689 | ATP5G3 | 400  | 493  | 5.60048312806 |
| NM_001689 | ATP5G3 | 524  | 720  | 7.10298346858 |
| NM_024996 | GFM1   | 444  | 516  | 6.43861394645 |
| NM_024996 | GFM1   | 1320 | 1382 | 7.02357643962 |
| NM_024996 | GFM1   | 2032 | 2111 | 7.76054204134 |
| NM_024996 | GFM1   | 719  | 785  | 5.4386139389  |
| NM_024996 | GFM1   | 1822 | 1875 | 6.4386139389  |
| NM_024996 | GFM1   | 1246 | 1309 | 7.02357644717 |
| NM_024996 | GFM1   | 2113 | 2184 | 7.76054204134 |
| NM_024996 | GFM1   | 2814 | 2900 | 7.76054204134 |
| NM_024996 | GFM1   | 1749 | 1795 | 5.35447473706 |
| NM_024996 | GFM1   | 2361 | 2466 | 7.76054204134 |
| NM_024996 | GFM1   | 1524 | 1664 | 9.34550454206 |
| NM_024996 | GFM1   | 3266 | 3313 | 7.02340269685 |
| NM_024996 | GFM1   | 49   | 118  | 7.02357643962 |
| NM_024996 | GFM1   | 894  | 997  | 7.43861394645 |
| NM_024996 | GFM1   | 1898 | 1981 | 6.43861394623 |
| NM_024996 | GFM1   | 287  | 414  | 8.24596886851 |
| NM_024996 | GFM1   | 1031 | 1236 | 8.76054204134 |
| NM_024996 | GFM1   | 1414 | 1510 | 6.43861394645 |
| NM_024996 | GFM1   | 516  | 668  | 7.02357644717 |
| NM_015986 | CRLF3  | 364  | 413  | 6.9638293192  |
| NM_015986 | CRLF3  | 1035 | 1155 | 7.96784691937 |
| NM_015987 | HEBP1  | 207  | 270  | 5.57340013997 |
| NM_015987 | HEBP1  | 1071 | 1163 | 6.57340687102 |
| NM_015987 | HEBP1  | 717  | 787  | 5.57323312071 |
| NM_015983 | UBE2D4 | 2154 | 2211 | 9.89176501677 |
| NM_020726 | NLN    | 2654 | 2719 | 6.26150872277 |
| NM_020726 | NLN    | 1730 | 1758 | 4.59258076298 |
| NM_020726 | NLN    | 6152 | 6203 | 4.67270237219 |

|           |        |      |      |               |
|-----------|--------|------|------|---------------|
| NM_020726 | NLN    | 1232 | 1367 | 6.67671324131 |
| NM_020726 | NLN    | 4366 | 4435 | 4.67671973645 |
| NM_017586 | C9orf7 | 449  | 530  | 7.05132122545 |
| NM_017586 | C9orf7 | 224  | 281  | 6.0513144944  |
| NM_138463 | TLCD1  | 369  | 444  | 8.63764677844 |
| NM_138463 | TLCD1  | 690  | 732  | 9.55368131938 |
| NM_138463 | TLCD1  | 502  | 556  | 8.63764677844 |
| NM_017582 | UBE2Q1 | 898  | 969  | 6.44085040632 |
| NM_017582 | UBE2Q1 | 656  | 748  | 5.70388481215 |
| NM_017582 | UBE2Q1 | 1421 | 1507 | 6.70388481215 |
| NM_017582 | UBE2Q1 | 1117 | 1155 | 4.11490471126 |
| NM_017582 | UBE2Q1 | 969  | 1016 | 5.11892231121 |
| NM_017582 | UBE2Q1 | 505  | 590  | 6.11892231143 |
| NM_017582 | UBE2Q1 | 1734 | 1815 | 6.11892231121 |
| NM_017582 | UBE2Q1 | 2220 | 2266 | 5.7038780811  |
| NM_017582 | UBE2Q1 | 1510 | 1607 | 5.11490471126 |
| NM_017582 | UBE2Q1 | 1315 | 1415 | 5.11892231143 |
| NM_017583 | TRIM44 | 2431 | 2474 | 3.30244528548 |
| NM_017583 | TRIM44 | 814  | 874  | 3.29842769285 |
| NM_017583 | TRIM44 | 3617 | 3692 | 4.29842769285 |
| NM_017583 | TRIM44 | 4014 | 4059 | 3.29842769285 |
| NM_017583 | TRIM44 | 964  | 1083 | 3.30227154271 |
| NM_017583 | TRIM44 | 2333 | 2385 | 4.30244505711 |
| NM_017583 | TRIM44 | 1190 | 1247 | 4.80326858436 |
| NM_017580 | ZRANB1 | 2750 | 2813 | 5.97960231971 |
| NM_017580 | ZRANB1 | 1059 | 1192 | 6.97960232726 |
| NM_017580 | ZRANB1 | 1553 | 1668 | 6.56456482798 |
| NM_017580 | ZRANB1 | 414  | 486  | 4.97942857694 |
| NM_017580 | ZRANB1 | 499  | 591  | 4.9795955962  |
| NM_017580 | ZRANB1 | 1753 | 1863 | 7.30153042192 |
| NM_003766 | BECN1  | 1251 | 1297 | 3.57815384317 |
| NM_003766 | BECN1  | 1890 | 1942 | 4.57814734803 |
| NM_003766 | BECN1  | 1814 | 1859 | 4.4940148697  |
| NM_003766 | BECN1  | 579  | 622  | 4.57798032877 |
| NM_003766 | BECN1  | 1166 | 1234 | 5.16311657981 |
| NM_003766 | BECN1  | 625  | 763  | 5.16311657981 |
| NM_003766 | BECN1  | 2022 | 2086 | 4.57815407908 |
| NM_198887 | NUP43  | 897  | 952  | 7.01477507989 |
| NM_198887 | NUP43  | 1152 | 1209 | 7.336703175   |
| NM_198887 | NUP43  | 3793 | 3859 | 6.51559837145 |
| NM_198887 | NUP43  | 3734 | 3773 | 6.0146013298  |
| NM_198887 | NUP43  | 1983 | 2024 | 5.0146013298  |
| NM_198887 | NUP43  | 1108 | 1147 | 6.01075747994 |
| NM_198887 | NUP43  | 1339 | 1483 | 7.336703175   |
| NM_198887 | NUP43  | 204  | 268  | 7.01477508011 |
| NM_198887 | NUP43  | 771  | 888  | 6.59973758084 |
| NM_198887 | NUP43  | 2751 | 2810 | 4.93063587073 |
| NM_198887 | NUP43  | 488  | 681  | 8.47420669875 |
| NM_198887 | NUP43  | 332  | 437  | 6.59973758084 |
| NM_198887 | NUP43  | 2192 | 2252 | 4.93063587073 |

|              |         |      |      |               |
|--------------|---------|------|------|---------------|
| NM_198881    | TBC1D8B | 1364 | 1450 | 9.15395879091 |
| NM_001164475 | SLC41A3 | 728  | 767  | 6.57316156734 |
| NM_001164475 | SLC41A3 | 1385 | 1427 | 7.15812406807 |
| NM_001164475 | SLC41A3 | 436  | 498  | 5.57316156734 |
| NM_001164475 | SLC41A3 | 1427 | 1508 | 7.23824567728 |
| NM_001164475 | SLC41A3 | 522  | 640  | 7.65730077673 |
| NM_198889    | ANKRD17 | 3194 | 3232 | 4.92345572089 |
| NM_198889    | ANKRD17 | 440  | 512  | 5.00759469436 |
| NM_198889    | ANKRD17 | 2784 | 2828 | 5.00742117996 |
| NM_198889    | ANKRD17 | 1133 | 1201 | 7.00759493028 |
| NM_198889    | ANKRD17 | 709  | 800  | 7.00759493028 |
| NM_198889    | ANKRD17 | 6514 | 6584 | 5.00759469436 |
| NM_198889    | ANKRD17 | 339  | 372  | 5.0035773301  |
| NM_198889    | ANKRD17 | 2504 | 2555 | 6.00759493028 |
| NM_198889    | ANKRD17 | 1714 | 1766 | 6.00759469436 |
| NM_198889    | ANKRD17 | 575  | 643  | 6.59238368068 |
| NM_198889    | ANKRD17 | 6759 | 6819 | 7.00759493027 |
| NM_198889    | ANKRD17 | 931  | 1015 | 7.592557431   |
| NM_198889    | ANKRD17 | 7649 | 7698 | 4.92345572089 |
| NM_198889    | ANKRD17 | 6860 | 6902 | 4.92345572089 |
| NM_198889    | ANKRD17 | 3981 | 4023 | 5.0035773301  |
| NM_198889    | ANKRD17 | 2583 | 2619 | 5.0035773301  |
| NM_198889    | ANKRD17 | 1917 | 2053 | 6.592557431   |
| NM_198889    | ANKRD17 | 2878 | 3051 | 8.32952302516 |
| NM_198889    | ANKRD17 | 1532 | 1598 | 6.00759493028 |
| NM_198889    | ANKRD17 | 4384 | 4457 | 6.0035773301  |
| NM_198889    | ANKRD17 | 5612 | 5674 | 6.00742117996 |
| NM_198889    | ANKRD17 | 3247 | 3306 | 6.58853983082 |
| NM_198889    | ANKRD17 | 1213 | 1295 | 7.32952302516 |
| NM_198889    | ANKRD17 | 2241 | 2374 | 6.592557431   |
| NM_198889    | ANKRD17 | 2633 | 2681 | 5.00758819922 |
| NM_198889    | ANKRD17 | 801  | 908  | 6.592557431   |
| NM_198889    | ANKRD17 | 5110 | 5168 | 4.92345572089 |
| NM_198889    | ANKRD17 | 7085 | 7208 | 6.00759493028 |
| NM_198889    | ANKRD17 | 7385 | 7537 | 6.592557431   |
| NM_198889    | ANKRD17 | 4592 | 4771 | 7.32952302516 |
| NM_198889    | ANKRD17 | 7259 | 7384 | 6.592557431   |
| NM_001024649 | CANX    | 2884 | 2931 | 5.0028346183  |
| NM_001024649 | CANX    | 3211 | 3329 | 5.0028346183  |
| NM_001024649 | CANX    | 4701 | 4769 | 1.3337329082  |
| NM_001024649 | CANX    | 2318 | 2436 | 5.22522703964 |
| NM_001024649 | CANX    | 53   | 1268 | 9.31268988089 |
| NM_001024649 | CANX    | 3941 | 4127 | 5.87730373622 |
| NM_001024649 | CANX    | 2169 | 2307 | 4.87730373622 |
| NM_001024649 | CANX    | 1281 | 2165 | 8.68465865827 |
| NM_001024649 | CANX    | 2939 | 3167 | 5.32476271319 |
| NM_001024649 | CANX    | 2439 | 2883 | 7.14579257214 |
| NM_001024649 | CANX    | 3345 | 3905 | 7.46226623694 |
| NM_001024647 | RAB3IP  | 2294 | 2374 | 7.84112334192 |
| NM_001024647 | RAB3IP  | 557  | 626  | 7.84112334192 |

|              |         |      |      |               |
|--------------|---------|------|------|---------------|
| NM_001024647 | RAB3IP  | 1250 | 1292 | 8.84496719178 |
| NM_001024647 | RAB3IP  | 5581 | 5667 | 6.84514070618 |
| NM_145274    | TMEM99  | 317  | 418  | 8.00007525227 |
| NM_145274    | TMEM99  | 539  | 673  | 10.8074301743 |
| NM_006642    | SDCCAG8 | 891  | 946  | 7.85161450301 |
| NM_006640    | SEPT9   | 2342 | 2437 | 3.65398905866 |
| NM_006640    | SEPT9   | 2134 | 2233 | 4.97591715355 |
| NM_006640    | SEPT9   | 2066 | 2112 | 2.65381530834 |
| NM_006640    | SEPT9   | 3601 | 3670 | 4.23895155938 |
| NM_006640    | SEPT9   | 1280 | 1346 | 2.56984984928 |
| NM_006640    | SEPT9   | 3670 | 3716 | 4.65398905866 |
| NM_006640    | SEPT9   | 3344 | 3387 | 2.64997145849 |
| NM_006640    | SEPT9   | 2907 | 2931 | 2.56984984928 |
| NM_006640    | SEPT9   | 3425 | 3469 | 2.65398905844 |
| NM_006640    | SEPT9   | 836  | 1013 | 4.65398905866 |
| NM_006640    | SEPT9   | 3491 | 3593 | 2.65398905866 |
| NM_006640    | SEPT9   | 4271 | 4395 | 6.1134206773  |
| NM_006640    | SEPT9   | 4004 | 4149 | 5.23895155938 |
| NM_006640    | SEPT9   | 1092 | 1249 | 3.65398905866 |
| NM_006640    | SEPT9   | 2752 | 2812 | 4.23895155938 |
| NM_006640    | SEPT9   | 1751 | 2062 | 5.65398905866 |
| NM_006640    | SEPT9   | 1558 | 1699 | 3.65398905866 |
| NM_006640    | SEPT9   | 3824 | 3950 | 5.65398905866 |
| NM_006645    | STARD10 | 834  | 910  | 4.97794003155 |
| NM_006645    | STARD10 | 1086 | 1147 | 5.98195763173 |
| NM_006645    | STARD10 | 1352 | 1399 | 4.97794003155 |
| NM_006645    | STARD10 | 1235 | 1336 | 5.56692013244 |
| NM_006644    | HSPH1   | 2975 | 3040 | 6.59989506952 |
| NM_006644    | HSPH1   | 3357 | 3524 | 6.59989506952 |
| NM_006644    | HSPH1   | 2541 | 2639 | 5.86292947535 |
| NM_006644    | HSPH1   | 1898 | 2000 | 6.86292947535 |
| NM_006644    | HSPH1   | 155  | 210  | 5.19382776525 |
| NM_006644    | HSPH1   | 556  | 596  | 5.27796697463 |
| NM_006644    | HSPH1   | 604  | 698  | 6.59989506952 |
| NM_006644    | HSPH1   | 3046 | 3095 | 5.86292947513 |
| NM_006644    | HSPH1   | 3142 | 3236 | 5.27796697463 |
| NM_006644    | HSPH1   | 2664 | 2738 | 6.27796697463 |
| NM_006644    | HSPH1   | 2425 | 2541 | 7.08532189669 |
| NM_006644    | HSPH1   | 2748 | 2954 | 7.08532189669 |
| NM_006644    | HSPH1   | 3243 | 3352 | 6.59989506952 |
| NM_006644    | HSPH1   | 706  | 832  | 7.59989506952 |
| NM_006644    | HSPH1   | 1754 | 1858 | 6.59989506952 |
| NM_006644    | HSPH1   | 1573 | 1740 | 8.18485757024 |
| NM_006644    | HSPH1   | 894  | 1205 | 9.13594796976 |
| NM_006644    | HSPH1   | 251  | 327  | 4.27796697463 |
| NM_006644    | HSPH1   | 2247 | 2424 | 6.27796697463 |
| NM_006644    | HSPH1   | 1227 | 1503 | 8.36542981588 |
| NM_006644    | HSPH1   | 3551 | 3692 | 7.27796697463 |
| NM_006648    | WNK2    | 2436 | 2513 | 8.32061118258 |
| NM_006648    | WNK2    | 4922 | 4988 | 9.32061094666 |

|           |         |      |      |               |
|-----------|---------|------|------|---------------|
| NM_006648 | WNK2    | 912  | 975  | 8.32060445152 |
| NM_006648 | WNK2    | 993  | 1088 | 8.32061117503 |
| NM_006648 | WNK2    | 811  | 870  | 8.9055736833  |
| NM_006648 | WNK2    | 1498 | 1558 | 7.32061117503 |
| NM_006648 | WNK2    | 1843 | 1892 | 8.3165935824  |
| NM_006648 | WNK2    | 1402 | 1450 | 8.3165935824  |
| NM_006648 | WNK2    | 5619 | 5706 | 8.32060445152 |
| NM_006648 | WNK2    | 3745 | 3836 | 7.32061118257 |
| NM_006648 | WNK2    | 598  | 689  | 7.32061117503 |
| NM_006648 | WNK2    | 5212 | 5326 | 7.32061118258 |
| NM_002764 | PRPS1   | 953  | 991  | 6.55100751258 |
| NM_002764 | PRPS1   | 1919 | 1975 | 7.1359700133  |
| NM_002764 | PRPS1   | 394  | 431  | 6.55100751258 |
| NM_002764 | PRPS1   | 729  | 780  | 5.55100751258 |
| NM_002764 | PRPS1   | 326  | 393  | 5.63513999091 |
| NM_002764 | PRPS1   | 1285 | 1330 | 6.55100751258 |
| NM_002764 | PRPS1   | 1420 | 1509 | 7.95707481685 |
| NM_002764 | PRPS1   | 1212 | 1281 | 7.1359700133  |
| NM_002764 | PRPS1   | 1725 | 1900 | 7.95707481685 |
| NM_002764 | PRPS1   | 2037 | 2100 | 6.55100751258 |
| NM_002764 | PRPS1   | 618  | 729  | 7.63514672195 |
| NM_002764 | PRPS1   | 1331 | 1413 | 7.21993547236 |
| NM_002765 | PRPS2   | 768  | 824  | 6.76863264554 |
| NM_002765 | PRPS2   | 677  | 719  | 7.77247649539 |
| NM_002765 | PRPS2   | 612  | 656  | 7.68851103633 |
| NM_002765 | PRPS2   | 1114 | 1226 | 8.77265024571 |
| NM_002765 | PRPS2   | 1655 | 1726 | 8.35761274642 |
| NM_002765 | PRPS2   | 1292 | 1341 | 6.77247649539 |
| NM_002765 | PRPS2   | 399  | 547  | 9.77265024571 |
| NM_002766 | PRPSAP1 | 1552 | 1628 | 5.79834269676 |
| NM_002766 | PRPSAP1 | 1476 | 1523 | 4.21337346499 |
| NM_002766 | PRPSAP1 | 645  | 715  | 5.79834269676 |
| NM_002766 | PRPSAP1 | 1308 | 1364 | 5.21337346499 |
| NM_002945 | RPA1    | 2550 | 2661 | 7.12827140854 |
| NM_002945 | RPA1    | 2381 | 2428 | 4.2367772771  |
| NM_002945 | RPA1    | 2243 | 2306 | 6.32091648648 |
| NM_002945 | RPA1    | 219  | 501  | 9.45019950343 |
| NM_002945 | RPA1    | 547  | 656  | 6.64284458137 |
| NM_002945 | RPA1    | 2198 | 2242 | 5.2367772771  |
| NM_002945 | RPA1    | 2429 | 2529 | 5.90587898721 |
| NM_002945 | RPA1    | 920  | 1104 | 8.32091648648 |
| NM_002945 | RPA1    | 1830 | 1997 | 6.64284458137 |
| NM_002945 | RPA1    | 2046 | 2176 | 7.32091648648 |
| NM_002945 | RPA1    | 2716 | 2815 | 6.32091648648 |
| NM_002945 | RPA1    | 1422 | 1797 | 9.02135620463 |
| NM_002945 | RPA1    | 93   | 168  | 4.32091648648 |
| NM_002945 | RPA1    | 681  | 916  | 8.78034810512 |
| NM_002945 | RPA1    | 1149 | 1422 | 9.02135620463 |
| NM_002946 | RPA2    | 340  | 390  | 8.4260878066  |
| NM_002946 | RPA2    | 1073 | 1100 | 6.4259142922  |



|              |        |      |      |                |
|--------------|--------|------|------|----------------|
| NM_002946    | RPA2   | 1642 | 1697 | 6.42608803497  |
| NM_002947    | RPA3   | 1504 | 1577 | 8.32695256313  |
| NM_002947    | RPA3   | 1166 | 1198 | 7.24281335375  |
| NM_002947    | RPA3   | 1345 | 1382 | 7.24281335375  |
| NM_002947    | RPA3   | 1433 | 1502 | 7.91191505631  |
| NM_002948    | RPL15  | 544  | 591  | 4.21803873076  |
| NM_002948    | RPL15  | 655  | 759  | 4.66549770773  |
| NM_002948    | RPL15  | 1066 | 1117 | 2.75860711212  |
| NM_002948    | RPL15  | 915  | 988  | 3.75860711212  |
| NM_002948    | RPL15  | 1184 | 1233 | 2.33955201267  |
| NM_002948    | RPL15  | 1246 | 1310 | 2.75860710458  |
| NM_002948    | RPL15  | 1777 | 1858 | 3.34356961285  |
| NM_002948    | RPL15  | 1876 | 1933 | 2.75458951195  |
| NM_002948    | RPL15  | 615  | 653  | 0.674467902741 |
| NM_002948    | RPL15  | 1368 | 1448 | 2.75860711212  |
| NM_002948    | RPL15  | 368  | 542  | 4.21803873076  |
| NM_002948    | RPL15  | 996  | 1049 | 2.75860711212  |
| NM_002948    | RPL15  | 785  | 890  | 3.08053520701  |
| NM_002948    | RPL15  | 2078 | 2238 | 3.08053520701  |
| NM_002949    | MRPL12 | 492  | 606  | 5.28359703613  |
| NM_002949    | MRPL12 | 353  | 468  | 5.28359703613  |
| NM_001184781 | DGCR2  | 3621 | 3659 | 6.6637710894   |
| NM_001184781 | DGCR2  | 1460 | 1517 | 6.6637778129   |
| NM_001184781 | DGCR2  | 3418 | 3596 | 10.7512406617  |
| NM_001184781 | DGCR2  | 1139 | 1188 | 8.66377782045  |
| NM_001184781 | DGCR2  | 2606 | 2672 | 8.24874032117  |
| NM_001184781 | DGCR2  | 2688 | 2789 | 8.24874032117  |
| NM_001184781 | DGCR2  | 2056 | 2154 | 9.66377782045  |
| NM_001184781 | DGCR2  | 4054 | 4102 | 6.57963861107  |
| NM_001184781 | DGCR2  | 1696 | 1730 | 7.66360407013  |
| NM_001184781 | DGCR2  | 212  | 259  | 6.6637778129   |
| NM_001184781 | DGCR2  | 752  | 804  | 6.66377782023  |
| NM_001184781 | DGCR2  | 1731 | 1821 | 6.66377782045  |
| NM_001184781 | DGCR2  | 805  | 884  | 9.24874032117  |
| NM_001184781 | DGCR2  | 1573 | 1672 | 9.24874032117  |
| NM_001184781 | DGCR2  | 1199 | 1454 | 11.1873397765  |
| NM_001184781 | DGCR2  | 3305 | 3414 | 9.66377782045  |
| NM_001184781 | DGCR2  | 622  | 709  | 9.83370282189  |
| NM_001184781 | DGCR2  | 272  | 365  | 8.98570591534  |
| NM_001184781 | DGCR2  | 391  | 518  | 8.66377782045  |
| NM_001184781 | DGCR2  | 886  | 1134 | 10.9857059153  |
| NM_001184781 | DGCR2  | 3747 | 3965 | 9.83370282189  |
| NM_001184781 | DGCR2  | 2799 | 2913 | 7.66377782045  |
| NM_001184781 | DGCR2  | 2182 | 2312 | 8.66377782045  |
| NM_001184781 | DGCR2  | 2966 | 3275 | 11.5217588156  |
| NM_001184781 | DGCR2  | 1872 | 2016 | 9.47113274251  |
| NM_001184781 | DGCR2  | 2339 | 2592 | 10.1232094391  |
| NM_001184781 | DGCR2  | 4223 | 4449 | 10.8337028219  |
| NM_031426    | AIF1L  | 1649 | 1727 | 7.16589358847  |
| NM_031420    | MRPL9  | 577  | 657  | 3.58998023791  |

|              |          |      |      |               |               |
|--------------|----------|------|------|---------------|---------------|
| NM_031420    | MRPL9    | 729  | 818  | 4.58998696896 |               |
| NM_031420    | MRPL9    | 346  | 415  | 3.58998696141 |               |
| NM_031420    | MRPL9    | 917  | 1054 | 5.58998696896 |               |
| NM_031420    | MRPL9    | 1058 | 1205 | 3.58998696896 |               |
| NM_031423    | NUF2     | 1725 | 1791 | 4.25328861024 |               |
| NM_031423    | NUF2     | 438  | 482  | 5.75411863263 |               |
| NM_031422    | CHST9    | 2105 | 2139 | 11.1529512891 |               |
| NM_031422    | CHST9    | 1351 | 1428 | 10.1569688892 |               |
| NM_031422    | CHST9    | 206  | 296  | 12.1569686533 |               |
| NM_177983    | PPM1G    | 1132 | 1182 | 3.19794024607 |               |
| NM_177983    | PPM1G    | 1907 | 1982 | 4.51986834096 |               |
| NM_177983    | PPM1G    | 1634 | 1719 | 4.78290274679 |               |
| NM_177983    | PPM1G    | 1017 | 1062 | 3.77888514662 |               |
| NM_177983    | PPM1G    | 590  | 759  | 3.19794024607 |               |
| NM_177983    | PPM1G    | 1457 | 1606 | 4.78290274679 |               |
| NM_177983    | PPM1G    | 2102 | 2262 | 5.51986834096 |               |
| NM_177983    | PPM1G    | 354  | 497  | 5.00529516813 |               |
| NM_177983    | PPM1G    | 885  | 931  | 3.1939226459  |               |
| NM_177983    | PPM1G    | 1217 | 1392 | 3.78290274679 |               |
| NM_001193599 | SCP2     | 1702 | 1785 | 3.51349844172 |               |
| NM_001193599 | SCP2     | 1381 | 1443 | 3.51349821335 |               |
| NM_001193599 | SCP2     | 1967 | 2049 | 5.09846094999 |               |
| NM_001193599 | SCP2     | 1233 | 1380 | 5.51349844927 |               |
| NM_001193599 | SCP2     | 1802 | 1956 | 5.83542654416 |               |
| NM_001193599 | SCP2     | 1555 | 1658 | 6.51349844927 |               |
| NM_177987    | TUBB8    | 360  | 412  | 10.5752544838 |               |
| NM_177987    | TUBB8    | 888  | 917  | 11.5752544838 |               |
| NM_144497    | AKAP12   | 6312 | 6347 | 5.06787580782 |               |
| NM_144497    | AKAP12   | 342  | 394  | 3.47906945725 |               |
| NM_144497    | AKAP12   | 6151 | 6277 | 3.47906945725 |               |
| NM_144497    | AKAP12   | 3861 | 3908 | 3.4829133071  |               |
| NM_144497    | AKAP12   | 6844 | 6930 | 3.48308705742 |               |
| NM_004281    | BAG3     | 1276 | 1365 | 4.1946583674  |               |
| NM_004281    | BAG3     | 1608 | 1716 | 4.19465860332 |               |
| NM_016174    | CERCAM   | 1705 | 1753 | 7.92262852359 |               |
| NM_175058    | PLEKHA7  | 2080 | 2126 | 7.98466085875 |               |
| NM_178537    | B4GALNT4 |      | 1090 | 1149          | 6.44050967458 |
| NM_178537    | B4GALNT4 |      | 3314 | 3387          | 8.76261151979 |
| NM_178537    | B4GALNT4 |      | 2872 | 2942          | 7.44050967458 |
| NM_178537    | B4GALNT4 |      | 2092 | 2183          | 8.02564592562 |
| NM_178537    | B4GALNT4 |      | 1149 | 1210          | 6.44068342468 |
| NM_021826    | FASTKD5  | 232  | 316  | 7.18743620719 |               |
| NM_021826    | FASTKD5  | 2119 | 2186 | 6.18742947614 |               |
| NM_021826    | FASTKD5  | 1279 | 1351 | 6.77239870036 |               |
| NM_021826    | FASTKD5  | 2186 | 2267 | 5.18743619964 |               |
| NM_021826    | FASTKD5  | 1604 | 1656 | 6.77239197686 |               |
| NM_021826    | FASTKD5  | 471  | 545  | 6.18726245687 |               |
| NM_021826    | FASTKD5  | 96   | 187  | 7.18743620719 |               |
| NM_021826    | FASTKD5  | 2049 | 2112 | 7.18743620719 |               |
| NM_021826    | FASTKD5  | 1899 | 2028 | 7.18743620719 |               |

|              |           |      |      |               |               |
|--------------|-----------|------|------|---------------|---------------|
| NM_021826    | FASTKD5   | 671  | 753  | 5.18726245687 |               |
| NM_017547    | FOXRED1   | 1910 | 1958 | 8.06917837071 |               |
| NM_145859    | PDCD10    | 315  | 354  | 5.00036921279 |               |
| NM_145859    | PDCD10    | 192  | 256  | 5.00438657705 |               |
| NM_003545    | HIST1H4E  |      | 111  | 225           | 10.9663353991 |
| NM_003545    | HIST1H4E  |      | 0    | 58            | 8.38137289836 |
| NM_003545    | HIST1H4E  |      | 231  | 365           | 10.3813728984 |
| NM_003544    | HIST1H4B  |      | 0    | 43            | 10.3813726624 |
| NM_003544    | HIST1H4B  |      | 113  | 354           | 13.1887278204 |
| NM_001011553 | SEPT7     | 1667 | 1732 | 4.50583455923 |               |
| NM_001011553 | SEPT7     | 1569 | 1624 | 2.18390670025 |               |
| NM_001011553 | SEPT7     | 1635 | 1666 | 3.09976749088 |               |
| NM_001011553 | SEPT7     | 2051 | 2138 | 3.18390670026 |               |
| NM_001011553 | SEPT7     | 1428 | 1553 | 3.76886920098 |               |
| NM_001011553 | SEPT7     | 1069 | 1230 | 5.3538317017  |               |
| NM_001011553 | SEPT7     | 2232 | 2287 | 3.18373294994 |               |
| NM_001011553 | SEPT7     | 1809 | 1958 | 4.18390670026 |               |
| NM_001011553 | SEPT7     | 902  | 972  | 3.18390670026 |               |
| NM_001011553 | SEPT7     | 287  | 536  | 6.3538317017  |               |
| NM_001011553 | SEPT7     | 1277 | 1382 | 2.18390670026 |               |
| NM_001011553 | SEPT7     | 550  | 784  | 6.57622412304 |               |
| NM_003542    | HIST1H4C  |      | 215  | 360           | 9.05944480347 |
| NM_003542    | HIST1H4C  |      | 132  | 181           | 6.35900484941 |
| NM_001011551 | C1GALT1C1 |      | 365  | 486           | 8.63581946389 |
| NM_001011551 | C1GALT1C1 |      | 93   | 129           | 4.93136214558 |
| NM_001011551 | C1GALT1C1 |      | 260  | 355           | 8.52034224647 |
| NM_001011551 | C1GALT1C1 |      | 715  | 1326          | 11.4431743859 |
| NM_001011551 | C1GALT1C1 |      | 1453 | 1642          | 7.93537974575 |
| NM_001011551 | C1GALT1C1 |      | 493  | 632           | 8.63581946389 |
| NM_001011551 | C1GALT1C1 |      | 637  | 713           | 6.52034201055 |
| NM_001145211 | SLC02B1   | 1958 | 2007 | 9.5351379284  |               |
| NM_001145211 | SLC02B1   | 225  | 310  | 9.61525953761 |               |
| NM_001145211 | SLC02B1   | 2602 | 2656 | 9.5351379284  |               |
| NM_207012    | AP3M1     | 1200 | 1232 | 4.69269816547 |               |
| NM_207012    | AP3M1     | 1379 | 1442 | 4.77683737464 |               |
| NM_207012    | AP3M1     | 3211 | 3248 | 6.35778227541 |               |
| NM_207012    | AP3M1     | 483  | 572  | 4.7768306438  |               |
| NM_207012    | AP3M1     | 609  | 654  | 5.77683713894 |               |
| NM_207012    | AP3M1     | 1014 | 1066 | 6.27766066619 |               |
| NM_207012    | AP3M1     | 1295 | 1377 | 7.36179987558 |               |
| NM_207012    | AP3M1     | 3416 | 3589 | 8.09876546974 |               |
| NM_207012    | AP3M1     | 1073 | 1189 | 7.36179987558 |               |
| NM_207012    | AP3M1     | 359  | 448  | 6.77683737485 |               |
| NM_207012    | AP3M1     | 680  | 877  | 8.477277093   |               |
| NM_014748    | SNX17     | 926  | 1010 | 6.74607697864 |               |
| NM_014748    | SNX17     | 736  | 839  | 5.16111447792 |               |
| NM_014748    | SNX17     | 433  | 479  | 4.1609407276  |               |
| NM_014748    | SNX17     | 1639 | 1693 | 5.74607697842 |               |
| NM_014748    | SNX17     | 641  | 705  | 5.1609407276  |               |
| NM_014748    | SNX17     | 1799 | 1870 | 5.1609407276  |               |

|              |        |      |      |               |
|--------------|--------|------|------|---------------|
| NM_014748    | SNX17  | 1050 | 1162 | 6.16111447791 |
| NM_014748    | SNX17  | 859  | 921  | 5.16110774687 |
| NM_014741    | ATG13  | 1030 | 1079 | 7.71998845933 |
| NM_014741    | ATG13  | 3670 | 3729 | 6.05088674944 |
| NM_014741    | ATG13  | 1891 | 1929 | 7.71998172849 |
| NM_014741    | ATG13  | 2330 | 2373 | 7.13485220851 |
| NM_014741    | ATG13  | 2705 | 2742 | 6.13502572291 |
| NM_014741    | ATG13  | 727  | 799  | 7.71597085937 |
| NM_014741    | ATG13  | 1137 | 1223 | 7.71998172849 |
| NM_014741    | ATG13  | 2604 | 2692 | 8.94238088088 |
| NM_014741    | ATG13  | 1374 | 1440 | 7.71998845933 |
| NM_014741    | ATG13  | 119  | 251  | 7.13502595883 |
| NM_014741    | ATG13  | 2391 | 2472 | 7.71981470923 |
| NM_014740    | EIF4A3 | 1179 | 1235 | 5.36808243887 |
| NM_014740    | EIF4A3 | 1288 | 1341 | 5.36807570804 |
| NM_014740    | EIF4A3 | 878  | 907  | 4.28394322971 |
| NM_014740    | EIF4A3 | 1402 | 1480 | 5.36808243909 |
| NM_014740    | EIF4A3 | 276  | 333  | 4.95304493981 |
| NM_014740    | EIF4A3 | 1344 | 1385 | 4.94902733964 |
| NM_014740    | EIF4A3 | 931  | 1124 | 7.2749730347  |
| NM_014740    | EIF4A3 | 651  | 804  | 6.69001053398 |
| NM_014740    | EIF4A3 | 485  | 641  | 6.82751405773 |
| NM_014740    | EIF4A3 | 1490 | 1635 | 4.95304493981 |
| NM_001100910 | FAM72B | 991  | 1070 | 9.68878134141 |
| NM_001100910 | FAM72B | 1920 | 2036 | 8.10381884091 |
| NM_001100910 | FAM72B | 2162 | 2244 | 8.10381884091 |
| NM_014742    | TM9SF4 | 3002 | 3037 | 5.58932493972 |
| NM_014742    | TM9SF4 | 56   | 127  | 5.58932517564 |
| NM_014742    | TM9SF4 | 2648 | 2788 | 6.91125327053 |
| NM_014742    | TM9SF4 | 2872 | 2999 | 7.75925017708 |
| NM_014742    | TM9SF4 | 3510 | 3604 | 6.17428767636 |
| NM_014742    | TM9SF4 | 3297 | 3454 | 8.49621577125 |
| NM_014742    | TM9SF4 | 192  | 1229 | 11.8467130183 |
| NM_014742    | TM9SF4 | 2121 | 2482 | 9.94687718026 |
| NM_014742    | TM9SF4 | 2484 | 2639 | 8.04875679428 |
| NM_014742    | TM9SF4 | 3129 | 3228 | 7.17428767636 |
| NM_014742    | TM9SF4 | 3654 | 3951 | 8.49621577125 |
| NM_014742    | TM9SF4 | 1236 | 2116 | 12.0731409529 |
| NM_005234    | NR2F6  | 565  | 666  | 9.88672321584 |
| NM_005234    | NR2F6  | 716  | 748  | 7.3015869648  |
| NM_005234    | NR2F6  | 380  | 462  | 8.88672321584 |
| NM_005234    | NR2F6  | 1202 | 1319 | 9.88672321584 |
| NM_005234    | NR2F6  | 926  | 1004 | 7.30175398407 |
| NM_005234    | NR2F6  | 1321 | 1528 | 10.7611923338 |
| NM_005234    | NR2F6  | 258  | 368  | 10.62368881   |
| NM_005234    | NR2F6  | 1013 | 1106 | 9.30176071512 |
| NM_005234    | NR2F6  | 1583 | 1797 | 10.4716857166 |
| NM_005234    | NR2F6  | 788  | 884  | 8.30176071512 |
| NM_032199    | ARID5B | 4685 | 4751 | 6.36140013906 |
| NM_005230    | ELK3   | 1278 | 1324 | 7.65619734829 |

|              |          |      |      |                   |
|--------------|----------|------|------|-------------------|
| NM_032194    | RPF2     | 681  | 761  | 3.84280436321     |
| NM_032194    | RPF2     | 42   | 119  | 3.83878677058     |
| NM_032195    | SON      | 2901 | 2971 | 6.87609390278     |
| NM_032195    | SON      | 6557 | 6674 | 6.61305949695     |
| NM_032195    | SON      | 4497 | 4540 | 4.29112467101     |
| NM_032195    | SON      | 1833 | 1934 | 5.87609390278     |
| NM_032195    | SON      | 101  | 158  | 5.29113139451     |
| NM_032195    | SON      | 4826 | 4903 | 7.09848632412     |
| NM_032195    | SON      | 871  | 908  | 5.7919546934      |
| NM_032195    | SON      | 1772 | 1830 | 4.29113140184     |
| NM_032195    | SON      | 2335 | 2451 | 5.87609390278     |
| NM_032195    | SON      | 6091 | 6227 | 7.09848632412     |
| NM_032195    | SON      | 1545 | 1658 | 6.61305949695     |
| NM_032195    | SON      | 4670 | 4762 | 7.09848632412     |
| NM_032195    | SON      | 5604 | 5677 | 5.28711380189     |
| NM_032195    | SON      | 235  | 365  | 6.61305949695     |
| NM_032195    | SON      | 4927 | 5039 | 5.87609390278     |
| NM_032195    | SON      | 1972 | 2113 | 7.4610564035      |
| NM_032195    | SON      | 5193 | 5377 | 8.19802199767     |
| NM_032195    | SON      | 910  | 987  | 6.29113140206     |
| NM_032195    | SON      | 1029 | 1193 | 7.4610564035      |
| NM_032195    | SON      | 4553 | 4651 | 5.87609390278     |
| NM_032195    | SON      | 5787 | 5907 | 5.87609390278     |
| NM_032195    | SON      | 4074 | 4263 | 8.4610564035      |
| NM_032195    | SON      | 649  | 797  | 7.7505630207      |
| NM_032195    | SON      | 5065 | 5158 | 4.29113140206     |
| NM_032195    | SON      | 2455 | 2791 | 8.37859424331     |
| NM_032195    | SON      | 5542 | 5601 | 4.29112467101     |
| NM_032195    | SON      | 4284 | 4395 | 7.61305949695     |
| NM_032195    | SON      | 3647 | 4029 | 8.61305949695     |
| NM_032195    | SON      | 6319 | 6506 | 7.29113140206     |
| NM_032195    | SON      | 3032 | 3476 | 9.93498759184     |
| NM_032195    | SON      | 442  | 625  | 7.61305949695     |
| NM_005239    | ETS2     | 626  | 691  | 4.52671756984     |
| NM_005239    | ETS2     | 908  | 947  | 2.94174833807     |
| NM_005239    | ETS2     | 589  | 622  | 3.85761585974     |
| NM_005239    | ETS2     | 1037 | 1178 | 4.94175506912     |
| NM_032193    | RNASEH2C |      | 469  | 548 6.79702424619 |
| NM_015993    | PLL      | 317  | 403  | 6.12852742055     |
| NM_052940    | LRR42    | 1122 | 1193 | 4.48862151638     |
| NM_052940    | LRR42    | 367  | 439  | 5.48862151638     |
| NM_052940    | LRR42    | 1011 | 1072 | 7.07760160972     |
| NM_052940    | LRR42    | 610  | 718  | 7.49263911655     |
| NM_052940    | LRR42    | 906  | 999  | 5.4926323855      |
| NM_001204414 | TINAGL1  | 1234 | 1320 | 7.42620588126     |
| NM_001204414 | TINAGL1  | 560  | 607  | 7.42620588104     |
| NM_001204414 | TINAGL1  | 1680 | 1737 | 6.84124314462     |
| NM_001204414 | TINAGL1  | 1028 | 1083 | 6.83722578037     |
| NM_001204414 | TINAGL1  | 854  | 958  | 6.84124338054     |
| NM_001204414 | TINAGL1  | 269  | 521  | 10.5416830987     |

|              |         |      |      |               |
|--------------|---------|------|------|---------------|
| NM_001204414 | TINAGL1 | 1823 | 1889 | 6.84123664948 |
| NM_001204414 | TINAGL1 | 649  | 819  | 8.84124338054 |
| NM_001204414 | TINAGL1 | 131  | 211  | 5.84123664948 |
| NM_003876    | TMEM11  | 982  | 1062 | 5.28684312373 |
| NM_032772    | ZNF503  | 1067 | 1119 | 9.26755556291 |
| NM_032772    | ZNF503  | 2780 | 2822 | 7.59845385303 |
| NM_032772    | ZNF503  | 1831 | 1889 | 8.59845385303 |
| NM_015995    | KLF13   | 4878 | 4928 | 10.3561512521 |
| NM_015995    | KLF13   | 1491 | 1557 | 10.7713625017 |
| NM_015995    | KLF13   | 3810 | 3860 | 10.3563247665 |
| NM_015995    | KLF13   | 4044 | 4100 | 8.77135577065 |
| NM_015995    | KLF13   | 2243 | 2329 | 10.3563250022 |
| NM_015995    | KLF13   | 5129 | 5192 | 10.7673449015 |
| NM_001105247 | ARMC5   | 2697 | 2769 | 9.42612572874 |
| NM_032779    | CCDC142 | 1129 | 1157 | 10.7646385768 |
| NM_032779    | CCDC142 | 3136 | 3170 | 10.6805060984 |
| NM_032779    | CCDC142 | 2906 | 3021 | 10.7646453078 |
| NM_032779    | CCDC142 | 1276 | 1335 | 11.7606277077 |
| NM_001077489 | GNAS    | 1297 | 1514 | 4.34647282983 |
| NM_001077489 | GNAS    | 471  | 636  | 2.90590023845 |
| NM_001077489 | GNAS    | 685  | 1297 | 5.74240150617 |
| NM_053013    | EN03    | 332  | 417  | 6.54243945092 |
| NM_053013    | EN03    | 809  | 872  | 8.12338458739 |
| NM_001077484 | SLC38A1 | 6292 | 6346 | 7.96187394376 |
| NM_001077484 | SLC38A1 | 3218 | 3272 | 7.96187394375 |
| NM_001077484 | SLC38A1 | 7184 | 7281 | 8.69883953792 |
| NM_001077484 | SLC38A1 | 2062 | 2162 | 8.69883953792 |
| NM_001077484 | SLC38A1 | 2586 | 2639 | 6.37690471198 |
| NM_001077484 | SLC38A1 | 4802 | 4870 | 6.37690471198 |
| NM_001077484 | SLC38A1 | 1616 | 1681 | 8.37691144304 |
| NM_001077484 | SLC38A1 | 3428 | 3494 | 7.96187394376 |
| NM_001077484 | SLC38A1 | 5378 | 5416 | 6.29277223365 |
| NM_001077484 | SLC38A1 | 3496 | 3572 | 8.69883953792 |
| NM_001077484 | SLC38A1 | 2496 | 2570 | 8.96187394376 |
| NM_001077484 | SLC38A1 | 1571 | 1616 | 7.37690471198 |
| NM_001077484 | SLC38A1 | 5656 | 5695 | 8.37691120712 |
| NM_001077484 | SLC38A1 | 1708 | 1798 | 10.1842663651 |
| NM_001077484 | SLC38A1 | 7100 | 7168 | 7.37690471198 |
| NM_001077484 | SLC38A1 | 4397 | 4476 | 8.37691144304 |
| NM_001077484 | SLC38A1 | 3019 | 3076 | 6.37289384286 |
| NM_001077484 | SLC38A1 | 5867 | 5919 | 6.37691120712 |
| NM_001077484 | SLC38A1 | 1819 | 1998 | 9.83634306167 |
| NM_001077484 | SLC38A1 | 2178 | 2306 | 8.37691144304 |
| NM_001077484 | SLC38A1 | 2012 | 2058 | 7.9618672127  |
| NM_001077484 | SLC38A1 | 5468 | 5577 | 9.18426636509 |
| NM_001077484 | SLC38A1 | 2791 | 2861 | 8.69883953792 |
| NM_001077484 | SLC38A1 | 632  | 952  | 11.0207676328 |
| NM_001077484 | SLC38A1 | 3588 | 3692 | 6.37691144304 |
| NM_001077484 | SLC38A1 | 3821 | 4001 | 9.69883953792 |
| NM_001077484 | SLC38A1 | 1012 | 1319 | 11.0207676328 |

|              |         |      |      |               |
|--------------|---------|------|------|---------------|
| NM_001077484 | SLC38A1 | 510  | 627  | 9.54683644448 |
| NM_001077484 | SLC38A1 | 4550 | 4620 | 7.37690471198 |
| NM_001077484 | SLC38A1 | 2331 | 2446 | 7.96187393621 |
| NM_001077484 | SLC38A1 | 6431 | 6609 | 9.83634306167 |
| NM_001077484 | SLC38A1 | 7788 | 7903 | 8.69883953792 |
| NM_001077484 | SLC38A1 | 1321 | 1529 | 10.9618739438 |
| NM_001191003 | GST01   | 830  | 894  | 5.64999561524 |
| NM_001191003 | GST01   | 747  | 826  | 5.38696120941 |
| NM_001191003 | GST01   | 470  | 624  | 6.64999561524 |
| NM_001191003 | GST01   | 907  | 1019 | 6.23495811596 |
| NM_001191003 | GST01   | 672  | 742  | 4.06503311451 |
| NM_001191003 | GST01   | 323  | 457  | 5.06503311452 |
| NM_001098616 | C1orf43 | 114  | 133  | 5.18452139429 |
| NM_001098616 | C1orf43 | 943  | 1020 | 6.77350149518 |
| NM_001098616 | C1orf43 | 403  | 482  | 6.77350149518 |
| NM_001098616 | C1orf43 | 678  | 767  | 7.77350149518 |
| NM_001098616 | C1orf43 | 769  | 919  | 7.8889787126  |
| NM_001098616 | C1orf43 | 553  | 670  | 7.35846399591 |
| NM_001098616 | C1orf43 | 1080 | 1440 | 9.14273530485 |
| NM_001098616 | C1orf43 | 1825 | 1894 | 4.18853875854 |
| NM_001098616 | C1orf43 | 1496 | 1812 | 8.35846399591 |
| NM_022752    | ZNF574  | 1187 | 1243 | 10.4063559941 |
| NM_022750    | PARP12  | 145  | 197  | 7.24538888286 |
| NM_022750    | PARP12  | 1201 | 1281 | 9.83035138358 |
| NM_022750    | PARP12  | 3226 | 3370 | 8.83035138359 |
| NM_022757    | CCDC14  | 2849 | 2910 | 7.95981311736 |
| NM_022757    | CCDC14  | 2946 | 3007 | 7.95981311737 |
| NM_022757    | CCDC14  | 1027 | 1091 | 6.37485038073 |
| NM_022757    | CCDC14  | 1261 | 1353 | 7.37083301647 |
| NM_022757    | CCDC14  | 2078 | 2132 | 6.37083301647 |
| NM_022757    | CCDC14  | 3571 | 3630 | 6.37467686633 |
| NM_022757    | CCDC14  | 396  | 445  | 7.95963936705 |
| NM_022757    | CCDC14  | 2657 | 2726 | 8.37485061665 |
| NM_022757    | CCDC14  | 1432 | 1617 | 7.37485061665 |
| NM_022757    | CCDC14  | 588  | 825  | 8.69677871153 |
| NM_022757    | CCDC14  | 3713 | 3799 | 7.37485061665 |
| NM_022757    | CCDC14  | 1927 | 2005 | 6.37083301647 |
| NM_022757    | CCDC14  | 2229 | 2290 | 6.37485038073 |
| NM_022756    | MEAF6   | 238  | 274  | 4.62062963046 |
| NM_022756    | MEAF6   | 683  | 741  | 5.28955759025 |
| NM_022756    | MEAF6   | 286  | 325  | 3.70075123967 |
| NM_022754    | SFXN1   | 2499 | 2537 | 4.23142258267 |
| NM_022754    | SFXN1   | 920  | 1005 | 6.3155617845  |
| NM_022754    | SFXN1   | 2275 | 2340 | 4.31556155614 |
| NM_022754    | SFXN1   | 161  | 281  | 7.31556179205 |
| NM_022754    | SFXN1   | 445  | 539  | 7.12291671411 |
| NM_022754    | SFXN1   | 582  | 690  | 7.4854867935  |
| NM_022754    | SFXN1   | 2188 | 2269 | 4.31556179205 |
| NM_022754    | SFXN1   | 722  | 777  | 5.31538804174 |
| NM_022754    | SFXN1   | 1044 | 1110 | 5.31538804174 |

|              |         |      |      |               |
|--------------|---------|------|------|---------------|
| NM_017421    | COQ3    | 593  | 647  | 9.30874845172 |
| NM_015168    | ZC3H4   | 1160 | 1245 | 8.18216817649 |
| NM_015168    | ZC3H4   | 4933 | 5001 | 8.76713740826 |
| NM_015168    | ZC3H4   | 4198 | 4264 | 8.76713067721 |
| NM_015168    | ZC3H4   | 2909 | 2994 | 8.18217490754 |
| NM_015168    | ZC3H4   | 414  | 455  | 7.17815730737 |
| NM_015168    | ZC3H4   | 2426 | 2473 | 8.09803569816 |
| NM_015168    | ZC3H4   | 4055 | 4188 | 9.50410300243 |
| NM_015168    | ZC3H4   | 5001 | 5119 | 7.18217490754 |
| NM_001008410 | STEAP3  | 2796 | 2835 | 11.3642073055 |
| NM_001008410 | STEAP3  | 1610 | 1714 | 11.4483465147 |
| NM_001008410 | STEAP3  | 3716 | 3759 | 10.3642073055 |
| NM_001008410 | STEAP3  | 610  | 668  | 10.3642073055 |
| NM_001008410 | STEAP3  | 341  | 452  | 11.4483465074 |
| NM_001008410 | STEAP3  | 2835 | 2886 | 10.4481727646 |
| NM_015160    | PMPCA   | 313  | 396  | 6.49715688023 |
| NM_015160    | PMPCA   | 870  | 899  | 5.41301767084 |
| NM_015160    | PMPCA   | 627  | 703  | 5.49715688023 |
| NM_015160    | PMPCA   | 434  | 496  | 6.41301767084 |
| NM_015160    | PMPCA   | 229  | 302  | 5.49715664431 |
| NM_015160    | PMPCA   | 1377 | 1441 | 5.49715687268 |
| NM_015160    | PMPCA   | 540  | 624  | 6.08211938094 |
| NM_015160    | PMPCA   | 1012 | 1125 | 5.49715688023 |
| NM_015160    | PMPCA   | 1727 | 1785 | 4.49313928005 |
| NM_015161    | ARL6IP1 | 697  | 841  | 9.02855929988 |
| NM_015161    | ARL6IP1 | 2097 | 2190 | 8.22120437782 |
| NM_015161    | ARL6IP1 | 1658 | 1812 | 8.22120437782 |
| NM_015161    | ARL6IP1 | 1    | 666  | 11.3709514973 |
| NM_015161    | ARL6IP1 | 1221 | 1442 | 8.39112937927 |
| NM_015161    | ARL6IP1 | 1827 | 2070 | 9.68063599646 |
| NM_015161    | ARL6IP1 | 2192 | 2277 | 5.80616687854 |
| NM_015161    | ARL6IP1 | 843  | 1166 | 9.97609187999 |
| NM_015161    | ARL6IP1 | 1443 | 1607 | 6.80616687854 |
| NM_015167    | JMJD6   | 843  | 921  | 6.07267939537 |
| NM_015167    | JMJD6   | 1032 | 1089 | 6.06866179521 |
| NM_015167    | JMJD6   | 1102 | 1176 | 5.988540186   |
| NM_015167    | JMJD6   | 547  | 745  | 7.6576418961  |
| NM_015164    | PLEKHM2 | 3077 | 3161 | 8.28141520989 |
| NM_015164    | PLEKHM2 | 679  | 714  | 6.6123137357  |
| NM_015164    | PLEKHM2 | 721  | 773  | 7.69627919477 |
| NM_015164    | PLEKHM2 | 299  | 341  | 6.6123137357  |
| NM_015164    | PLEKHM2 | 398  | 454  | 7.6123137357  |
| NM_015164    | PLEKHM2 | 344  | 397  | 7.69645270917 |
| NM_001102575 | SNX18   | 1722 | 1827 | 10.199917862  |
| NM_018847    | KLHL9   | 4258 | 4309 | 8.20118804177 |
| NM_019067    | GNL3L   | 3365 | 3482 | 7.49705216638 |
| NM_019067    | GNL3L   | 1561 | 1627 | 7.49705216638 |
| NM_019067    | GNL3L   | 3644 | 3752 | 9.49705216638 |
| NM_019067    | GNL3L   | 2978 | 3042 | 7.49303456621 |
| NM_019067    | GNL3L   | 1177 | 1236 | 8.412912957   |



|           |         |       |       |               |
|-----------|---------|-------|-------|---------------|
| NM_019067 | GNL3L   | 7772  | 7834  | 8.49303456621 |
| NM_019067 | GNL3L   | 388   | 455   | 7.49705216638 |
| NM_019067 | GNL3L   | 1818  | 1908  | 9.81898026127 |
| NM_019067 | GNL3L   | 34    | 99    | 7.49687841606 |
| NM_019067 | GNL3L   | 1952  | 2022  | 9.07799706693 |
| NM_019067 | GNL3L   | 526   | 591   | 9.08201465955 |
| NM_019067 | GNL3L   | 5858  | 5929  | 7.49705193046 |
| NM_019067 | GNL3L   | 6463  | 6527  | 8.49705216638 |
| NM_014612 | FAM120A | 1296  | 1349  | 5.47869150137 |
| NM_014612 | FAM120A | 1404  | 1477  | 6.56283071075 |
| NM_014612 | FAM120A | 1040  | 1123  | 7.88475880565 |
| NM_014612 | FAM120A | 2569  | 2632  | 6.56265696044 |
| NM_014612 | FAM120A | 4477  | 4591  | 8.7327557122  |
| NM_014612 | FAM120A | 2809  | 2862  | 5.55881311058 |
| NM_014612 | FAM120A | 4394  | 4451  | 6.47869150137 |
| NM_014612 | FAM120A | 2043  | 2119  | 5.56283071076 |
| NM_014612 | FAM120A | 4976  | 5119  | 8.14779321148 |
| NM_014612 | FAM120A | 823   | 959   | 7.14779321148 |
| NM_014612 | FAM120A | 2447  | 2518  | 6.56283071076 |
| NM_014612 | FAM120A | 1958  | 2025  | 6.56283071075 |
| NM_014612 | FAM120A | 1147  | 1229  | 7.14779320393 |
| NM_014612 | FAM120A | 4694  | 4793  | 5.56283071075 |
| NM_014612 | FAM120A | 653   | 799   | 7.56283071076 |
| NM_014611 | MDN1    | 10528 | 10583 | 7.27936962848 |
| NM_014611 | MDN1    | 3658  | 3703  | 6.28321347833 |
| NM_014611 | MDN1    | 10948 | 11001 | 7.78421051999 |
| NM_014611 | MDN1    | 17909 | 17987 | 6.2833804976  |
| NM_014611 | MDN1    | 751   | 804   | 8.28338722865 |
| NM_014611 | MDN1    | 6101  | 6148  | 6.19924801927 |
| NM_014611 | MDN1    | 2363  | 2490  | 8.60531532354 |
| NM_014611 | MDN1    | 1209  | 1299  | 7.86834972182 |
| NM_014611 | MDN1    | 11082 | 11138 | 7.19924801927 |
| NM_014611 | MDN1    | 1081  | 1121  | 6.2833804976  |
| NM_014611 | MDN1    | 3804  | 3861  | 6.19924801927 |
| NM_014611 | MDN1    | 8807  | 8865  | 7.86834972937 |
| NM_014611 | MDN1    | 11940 | 12023 | 7.27936962848 |
| NM_014611 | MDN1    | 335   | 376   | 7.27936962848 |
| NM_014611 | MDN1    | 7032  | 7076  | 7.19924801927 |
| NM_014611 | MDN1    | 4302  | 4406  | 6.27936962848 |
| NM_014611 | MDN1    | 11592 | 11691 | 7.28338699273 |
| NM_014611 | MDN1    | 7629  | 7693  | 6.27936962848 |
| NM_014611 | MDN1    | 14036 | 14085 | 7.28321347833 |
| NM_014611 | MDN1    | 6882  | 6992  | 8.28338722865 |
| NM_014611 | MDN1    | 2300  | 2348  | 6.2833872211  |
| NM_014611 | MDN1    | 4915  | 4957  | 7.28321347833 |
| NM_014611 | MDN1    | 2118  | 2175  | 7.19924801927 |
| NM_014611 | MDN1    | 7232  | 7291  | 7.19924801927 |
| NM_014611 | MDN1    | 8439  | 8542  | 7.86817597905 |
| NM_014611 | MDN1    | 11154 | 11250 | 7.28338722843 |
| NM_014611 | MDN1    | 1413  | 1489  | 7.28338722864 |

|              |       |      |      |               |
|--------------|-------|------|------|---------------|
| NM_014611    | MDN1  | 4568 | 4636 | 7.2833804976  |
| NM_014611    | MDN1  | 3343 | 3433 | 7.28338722865 |
| NM_014611    | MDN1  | 2790 | 2888 | 7.2833872211  |
| NM_001178136 | HDHD1 | 698  | 734  | 6.26392173501 |
| NM_001178136 | HDHD1 | 531  | 566  | 6.26776558486 |
| NM_001178139 | TFDP2 | 5351 | 5421 | 5.47181112588 |
| NM_001178139 | TFDP2 | 5789 | 5866 | 5.47181112566 |
| NM_058181    | YBEY  | 394  | 492  | 9.32791249592 |
| NM_001040202 | PAQR3 | 531  | 573  | 10.8852854736 |
| NM_004124    | GMFB  | 117  | 179  | 6.74403703167 |
| NM_004124    | GMFB  | 495  | 542  | 6.32899280133 |
| NM_004124    | GMFB  | 1130 | 1167 | 6.74403030061 |
| NM_004124    | GMFB  | 736  | 822  | 6.32899953239 |
| NM_004124    | GMFB  | 339  | 387  | 4.65989782228 |
| NM_004124    | GMFB  | 180  | 281  | 5.74403703144 |
| NM_001333    | CTSL2 | 647  | 718  | 7.75021758729 |
| NM_001333    | CTSL2 | 248  | 300  | 8.48700943114 |
| NM_001333    | CTSL2 | 811  | 918  | 8.16525508657 |
| NM_001333    | CTSL2 | 1034 | 1112 | 8.48718318146 |
| NM_001333    | CTSL2 | 495  | 608  | 8.75021758729 |
| NM_004127    | GPS1  | 850  | 914  | 7.13524827103 |
| NM_004127    | GPS1  | 179  | 243  | 4.55011201999 |
| NM_004127    | GPS1  | 1346 | 1387 | 6.13507452071 |
| NM_004127    | GPS1  | 915  | 964  | 4.54626817014 |
| NM_004127    | GPS1  | 652  | 720  | 6.55028577031 |
| NM_004127    | GPS1  | 436  | 515  | 5.55028577031 |
| NM_004127    | GPS1  | 61   | 179  | 6.13524827103 |
| NM_004127    | GPS1  | 1217 | 1307 | 5.55028576276 |
| NM_004127    | GPS1  | 1003 | 1191 | 7.8722138652  |
| NM_001440    | EXTL3 | 117  | 170  | 7.69764184786 |
| NM_001440    | EXTL3 | 2233 | 2283 | 8.69763512436 |
| NM_001440    | EXTL3 | 2510 | 2580 | 10.0195699503 |
| NM_001440    | EXTL3 | 3746 | 3791 | 8.69746810509 |
| NM_001440    | EXTL3 | 199  | 241  | 9.69764185541 |
| NM_001440    | EXTL3 | 1880 | 1956 | 9.69764185541 |
| NM_001440    | EXTL3 | 4170 | 4203 | 7.69362425524 |
| NM_001440    | EXTL3 | 5996 | 6065 | 9.28260435613 |
| NM_001440    | EXTL3 | 985  | 1044 | 8.61350264603 |
| NM_001440    | EXTL3 | 2741 | 2847 | 8.69764185541 |
| NM_001440    | EXTL3 | 648  | 709  | 9.28260434858 |
| NM_001440    | EXTL3 | 1065 | 1122 | 8.69764161949 |
| NM_001440    | EXTL3 | 4954 | 5050 | 10.2826043561 |
| NM_001440    | EXTL3 | 715  | 819  | 8.69764161949 |
| NM_001440    | EXTL3 | 3219 | 3295 | 9.69764185541 |
| NM_001440    | EXTL3 | 5069 | 5150 | 9.28260435613 |
| NM_001440    | EXTL3 | 4833 | 4881 | 9.28260435613 |
| NM_001440    | EXTL3 | 3393 | 3495 | 8.69764185541 |
| NM_001440    | EXTL3 | 5342 | 5430 | 8.69764185541 |
| NM_001440    | EXTL3 | 4408 | 4596 | 10.2826043561 |
| NM_001440    | EXTL3 | 853  | 923  | 8.61350264603 |

|              |         |      |      |               |
|--------------|---------|------|------|---------------|
| NM_001440    | EXTL3   | 2285 | 2380 | 9.69764185541 |
| NM_001440    | EXTL3   | 1293 | 1401 | 10.2826043561 |
| NM_001440    | EXTL3   | 243  | 451  | 10.5049967775 |
| NM_001440    | EXTL3   | 5159 | 5250 | 7.69764185541 |
| NM_001440    | EXTL3   | 2631 | 2728 | 9.69764185541 |
| NM_001440    | EXTL3   | 1461 | 1527 | 7.69362425524 |
| NM_001440    | EXTL3   | 3938 | 4059 | 9.69764185541 |
| NM_001440    | EXTL3   | 4635 | 4801 | 10.6976418554 |
| NM_001440    | EXTL3   | 5452 | 5705 | 11.5049967775 |
| NM_001440    | EXTL3   | 5257 | 5339 | 7.69764185519 |
| NM_001440    | EXTL3   | 472  | 549  | 9.69764161949 |
| NM_001440    | EXTL3   | 2850 | 2997 | 10.2826043561 |
| NM_001440    | EXTL3   | 3092 | 3173 | 8.69763512436 |
| NM_001441    | FAAH    | 1312 | 1366 | 9.63754718231 |
| NM_001441    | FAAH    | 869  | 918  | 8.13655014065 |
| NM_001441    | FAAH    | 398  | 462  | 10.136723891  |
| NM_001441    | FAAH    | 648  | 715  | 8.1327062908  |
| NM_001448    | GPC4    | 940  | 1029 | 13.8062345156 |
| NM_001448    | GPC4    | 1428 | 1491 | 12.5836683439 |
| NM_001448    | GPC4    | 2182 | 2240 | 11.9988728625 |
| NM_001448    | GPC4    | 1124 | 1190 | 13.3208076884 |
| NM_001448    | GPC4    | 1190 | 1242 | 12.5838353632 |
| NM_001448    | GPC4    | 1264 | 1304 | 12.4997028849 |
| NM_001448    | GPC4    | 760  | 840  | 12.9988795935 |
| NM_001448    | GPC4    | 1574 | 1721 | 14.3208076884 |
| NM_001448    | GPC4    | 560  | 711  | 13.8062345156 |
| NM_001448    | GPC4    | 258  | 487  | 13.5838420942 |
| NM_001164262 | PPIAL4F | 243  | 281  | 9.08549523583 |
| NM_001164262 | PPIAL4F | 152  | 213  | 8.34852964167 |
| NM_001164262 | PPIAL4F | 523  | 564  | 9.08549523583 |
| NM_001164262 | PPIAL4F | 604  | 642  | 8.34852964167 |
| NM_001164262 | PPIAL4F | 422  | 470  | 8.76356714095 |
| NM_001164262 | PPIAL4F | 656  | 683  | 8.76356690503 |
| NM_001164262 | PPIAL4F | 369  | 419  | 8.3445120415  |
| NM_001164261 | PPIAL4D | 523  | 564  | 9.31200376564 |
| NM_001164261 | PPIAL4D | 607  | 642  | 8.31200376564 |
| NM_001164261 | PPIAL4D | 423  | 470  | 8.31200376564 |
| NM_001164261 | PPIAL4D | 163  | 213  | 8.72704126492 |
| NM_001164261 | PPIAL4D | 721  | 745  | 6.727041029   |
| NM_001164261 | PPIAL4D | 215  | 281  | 9.04896935981 |
| NM_001164261 | PPIAL4D | 656  | 715  | 7.72704126492 |
| NM_000313    | PROS1   | 924  | 973  | 5.97934168352 |
| NM_000313    | PROS1   | 988  | 1034 | 4.9793416833  |
| NM_000313    | PROS1   | 1133 | 1168 | 4.89520247413 |
| NM_000313    | PROS1   | 1049 | 1121 | 6.30126977841 |
| NM_000313    | PROS1   | 781  | 831  | 3.97532408335 |
| NM_000313    | PROS1   | 487  | 541  | 5.97934167597 |
| NM_000313    | PROS1   | 583  | 669  | 5.56430418424 |
| NM_000313    | PROS1   | 1940 | 2040 | 5.97934168352 |
| NM_000313    | PROS1   | 2047 | 2181 | 6.56430418424 |

|           |          |      |      |               |               |
|-----------|----------|------|------|---------------|---------------|
| NM_000313 | PROS1    | 3117 | 3168 | 3.97532408335 |               |
| NM_000313 | PROS1    | 2433 | 2545 | 6.78669660558 |               |
| NM_000313 | PROS1    | 1541 | 1904 | 8.43877330216 |               |
| NM_000313 | PROS1    | 2247 | 2412 | 7.56430418424 |               |
| NM_000313 | PROS1    | 1301 | 1524 | 8.3716591063  |               |
| NM_000313 | PROS1    | 1169 | 1241 | 6.30126977841 |               |
| NM_000312 | PROC     | 868  | 938  | 4.21209184254 |               |
| NM_000312 | PROC     | 1493 | 1541 | 3.62311174165 |               |
| NM_000312 | PROC     | 1213 | 1255 | 3.62695559151 |               |
| NM_000312 | PROC     | 1572 | 1633 | 3.62311174165 |               |
| NM_000312 | PROC     | 651  | 741  | 2.62712934182 |               |
| NM_000312 | PROC     | 1357 | 1447 | 4.62712934182 |               |
| NM_000310 | PPT1     | 1025 | 1098 | 7.32160131426 |               |
| NM_000310 | PPT1     | 1621 | 1698 | 6.95903123488 |               |
| NM_000310 | PPT1     | 2152 | 2223 | 6.15167631282 |               |
| NM_000310 | PPT1     | 227  | 389  | 7.85211603096 |               |
| NM_000310 | PPT1     | 1259 | 1457 | 7.32160131426 |               |
| NM_000310 | PPT1     | 2053 | 2118 | 5.73663881354 |               |
| NM_000310 | PPT1     | 2279 | 2363 | 6.15167631282 |               |
| NM_000310 | PPT1     | 1139 | 1258 | 6.47360440771 |               |
| NM_000310 | PPT1     | 390  | 547  | 8.15167631282 |               |
| NM_000310 | PPT1     | 860  | 981  | 8.23913915407 |               |
| NM_000310 | PPT1     | 780  | 840  | 4.06753710344 |               |
| NM_000310 | PPT1     | 1523 | 1556 | 4.14765871265 |               |
| NM_000310 | PPT1     | 556  | 775  | 8.61110793146 |               |
| NM_030630 | C17orf28 |      | 1087 | 1133          | 10.0234342602 |
| NM_030630 | C17orf28 |      | 744  | 804           | 10.6082230181 |
| NM_030630 | C17orf28 |      | 1653 | 1736          | 10.6043791683 |
| NM_030630 | C17orf28 |      | 2429 | 2521          | 10.0234342675 |
| NM_030630 | C17orf28 |      | 3292 | 3345          | 10.0194166675 |
| NM_030630 | C17orf28 |      | 2557 | 2606          | 10.0234340318 |
| NM_030630 | C17orf28 |      | 591  | 721           | 10.6083967684 |
| NM_030630 | C17orf28 |      | 1180 | 1307          | 10.0234342677 |
| NM_030630 | C17orf28 |      | 1388 | 1506          | 11.3453623626 |
| NM_030630 | C17orf28 |      | 239  | 329           | 10.6083965325 |
| NM_030630 | C17orf28 |      | 1583 | 1648          | 10.6083967684 |
| NM_030636 | EPPD1    | 2777 | 2843 | 8.0541614962  |               |
| NM_030636 | EPPD1    | 467  | 576  | 10.0581790964 |               |
| NM_138788 | TMEM45B  | 1063 | 1138 | 5.47041082146 |               |
| NM_138788 | TMEM45B  | 1516 | 1599 | 4.88545481587 |               |
| NM_138788 | TMEM45B  | 1650 | 1697 | 3.8013158424  |               |
| NM_138788 | TMEM45B  | 1300 | 1335 | 3.88143745161 |               |
| NM_138788 | TMEM45B  | 7    | 65   | 5.47041755251 |               |
| NM_138788 | TMEM45B  | 341  | 660  | 9.05538005323 |               |
| NM_138788 | TMEM45B  | 1189 | 1290 | 5.47041755251 |               |
| NM_138788 | TMEM45B  | 91   | 340  | 8.88545505179 |               |
| NM_138788 | TMEM45B  | 737  | 1003 | 8.34488667042 |               |
| NM_021221 | LY6G5B   | 545  | 613  | 7.47939486508 |               |
| NM_021221 | LY6G5B   | 618  | 737  | 9.48341246526 |               |
| NM_021227 | OSTC     | 898  | 967  | 5.81314168001 |               |

|              |          |      |      |                   |
|--------------|----------|------|------|-------------------|
| NM_021227    | OSTC     | 967  | 1032 | 5.81314168001     |
| NM_021227    | OSTC     | 649  | 696  | 6.13105217472     |
| NM_021227    | OSTC     | 370  | 641  | 9.09854389887     |
| NM_021227    | OSTC     | 65   | 343  | 8.76733799039     |
| NM_021228    | SCAF1    | 2116 | 2151 | 7.53344556004     |
| NM_021228    | SCAF1    | 2718 | 2793 | 9.2025472626      |
| NM_021228    | SCAF1    | 2557 | 2623 | 9.61758476942     |
| NM_021228    | SCAF1    | 2677 | 2713 | 7.61758453351     |
| NM_021228    | SCAF1    | 2255 | 2297 | 7.53344556004     |
| NM_021228    | SCAF1    | 590  | 642  | 9.93951286431     |
| NM_021228    | SCAF1    | 2459 | 2516 | 7.61741101911     |
| NM_021228    | SCAF1    | 4071 | 4121 | 9.93951286431     |
| NM_021228    | SCAF1    | 1198 | 1219 | 8.61356716925     |
| NM_021228    | SCAF1    | 2187 | 2246 | 9.2025472626      |
| NM_021228    | SCAF1    | 1978 | 2053 | 7.61356716925     |
| NM_021228    | SCAF1    | 3799 | 3875 | 8.61758476942     |
| NM_021228    | SCAF1    | 1035 | 1101 | 7.61356716925     |
| NM_021228    | SCAF1    | 209  | 287  | 7.61741101911     |
| NM_021228    | SCAF1    | 3076 | 3154 | 7.61758476942     |
| NM_021228    | SCAF1    | 3406 | 3487 | 9.61758476942     |
| NM_021228    | SCAF1    | 360  | 590  | 10.2025472701     |
| NM_021229    | NTN4     | 1761 | 1802 | 8.30527314676     |
| NM_138785    | C6orf72  | 736  | 808  | 6.38237309664     |
| NM_138785    | C6orf72  | 1032 | 1070 | 4.79740386486     |
| NM_138785    | C6orf72  | 897  | 943  | 6.79339299575     |
| NM_138785    | C6orf72  | 614  | 717  | 6.38237309664     |
| NM_138785    | C6orf72  | 265  | 306  | 5.7972368456      |
| NM_138787    | C11orf74 |      | 65   | 169 6.21102611791 |
| NM_001083314 | CHMP1A   | 293  | 338  | 7.61917723161     |
| NM_001083314 | CHMP1A   | 795  | 871  | 5.61917050056     |
| NM_001083314 | CHMP1A   | 906  | 1024 | 9.42653215367     |
| NM_001083314 | CHMP1A   | 1632 | 1700 | 5.6190034813      |
| NM_001083314 | CHMP1A   | 492  | 590  | 7.61917723161     |
| NM_001083314 | CHMP1A   | 619  | 656  | 5.61515963144     |
| NM_001083314 | CHMP1A   | 338  | 429  | 7.20413973233     |
| NM_001083314 | CHMP1A   | 1803 | 1866 | 5.53503802223     |
| NM_001083314 | CHMP1A   | 1444 | 1526 | 7.61917723161     |
| NM_001083314 | CHMP1A   | 1714 | 1792 | 5.61515963144     |
| NM_001083314 | CHMP1A   | 2107 | 2204 | 7.20413973233     |
| NM_001083314 | CHMP1A   | 2054 | 2104 | 5.6190034813      |
| NM_001142650 | HNRPLL   | 491  | 526  | 6.68628557326     |
| NM_001142650 | HNRPLL   | 1051 | 1111 | 6.1014900918      |
| NM_001142650 | HNRPLL   | 1670 | 1711 | 6.01735761347     |
| NM_001142650 | HNRPLL   | 365  | 477  | 7.68645932357     |
| NM_001142650 | HNRPLL   | 1863 | 1941 | 5.10132307253     |
| NM_173514    | SLC38A9  | 1262 | 1314 | 10.2103257616     |
| NM_173514    | SLC38A9  | 1318 | 1389 | 10.4733601675     |
| NM_173514    | SLC38A9  | 663  | 836  | 11.0583226682     |
| NM_173514    | SLC38A9  | 619  | 662  | 9.4733534364      |
| NM_173514    | SLC38A9  | 1416 | 1510 | 9.47336016745     |

|              |          |      |      |               |               |
|--------------|----------|------|------|---------------|---------------|
| NM_173514    | SLC38A9  | 483  | 519  | 7.80425845735 |               |
| NM_173514    | SLC38A9  | 899  | 1016 | 10.4733601675 |               |
| NM_173514    | SLC38A9  | 1525 | 1628 | 10.2103257616 |               |
| NM_173514    | SLC38A9  | 1714 | 1922 | 12.0583226682 |               |
| NM_173514    | SLC38A9  | 1056 | 1225 | 11.3478292854 |               |
| NM_173514    | SLC38A9  | 70   | 134  | 9.88839743081 |               |
| NM_173514    | SLC38A9  | 137  | 298  | 10.6957525888 |               |
| NM_173515    | CNKSR3   | 685  | 745  | 6.77572778959 |               |
| NM_173515    | CNKSR3   | 514  | 577  | 5.77572778959 |               |
| NM_173517    | VKORC1L1 |      | 762  | 799           | 4.63474410834 |
| NM_173517    | VKORC1L1 |      | 161  | 216           | 6.63474410834 |
| NM_173517    | VKORC1L1 |      | 2548 | 2605          | 5.55061163001 |
| NM_173517    | VKORC1L1 |      | 4371 | 4432          | 4.63073323922 |
| NM_173517    | VKORC1L1 |      | 1131 | 1233          | 6.63475083939 |
| NM_173517    | VKORC1L1 |      | 1727 | 1762          | 5.63073323922 |
| NM_173517    | VKORC1L1 |      | 851  | 941           | 5.63475083939 |
| NM_173517    | VKORC1L1 |      | 2634 | 2686          | 5.63457708907 |
| NM_173517    | VKORC1L1 |      | 2233 | 2323          | 7.21971333256 |
| NM_173517    | VKORC1L1 |      | 409  | 520           | 7.21971334011 |
| NM_173517    | VKORC1L1 |      | 522  | 650           | 7.95667893428 |
| NM_173517    | VKORC1L1 |      | 2382 | 2466          | 6.21970660906 |
| NM_173510    | CCDC117  | 430  | 530  | 4.83013531805 |               |
| NM_173512    | SLC38A11 |      | 1157 | 1216          | 9.80958041806 |
| NM_004781    | VAMP3    | 1147 | 1196 | 4.0588648621  |               |
| NM_004781    | VAMP3    | 522  | 569  | 3.97874325289 |               |
| NM_004781    | VAMP3    | 197  | 259  | 3.06288245472 |               |
| NM_004781    | VAMP3    | 1347 | 1458 | 5.38481055716 |               |
| NM_004781    | VAMP3    | 1727 | 1781 | 3.0588648621  |               |
| NM_004781    | VAMP3    | 417  | 519  | 3.06288246227 |               |
| NM_004782    | SNAP29   | 844  | 923  | 4.12119903261 |               |
| NM_004782    | SNAP29   | 983  | 1031 | 3.11718143266 |               |
| NM_004782    | SNAP29   | 2747 | 2788 | 4.12102528251 |               |
| NM_004782    | SNAP29   | 1535 | 1596 | 3.12102528251 |               |
| NM_004782    | SNAP29   | 3267 | 3325 | 3.11718143266 |               |
| NM_004782    | SNAP29   | 1622 | 1693 | 4.12119230178 |               |
| NM_004785    | SLC9A3R2 |      | 357  | 405           | 6.07045780848 |
| NM_004785    | SLC9A3R2 |      | 908  | 964           | 7.15442326755 |
| NM_004785    | SLC9A3R2 |      | 666  | 720           | 6.15057941769 |
| NM_004786    | TXNL1    | 116  | 200  | 5.06939862869 |               |
| NM_004786    | TXNL1    | 360  | 441  | 5.33243303452 |               |
| NM_004786    | TXNL1    | 825  | 919  | 4.7474705338  |               |
| NM_004786    | TXNL1    | 558  | 623  | 2.74746380275 |               |
| NM_004786    | TXNL1    | 1087 | 1198 | 4.33243303452 |               |
| NM_004786    | TXNL1    | 639  | 788  | 6.55482545586 |               |
| NM_001001683 | MED11    | 92   | 131  | 5.90189741857 |               |
| NM_001001683 | MED11    | 312  | 379  | 4.90590828769 |               |
| NM_003370    | VASP     | 2054 | 2126 | 6.80399257502 |               |
| NM_003370    | VASP     | 338  | 401  | 7.54095816918 |               |
| NM_003370    | VASP     | 99   | 181  | 6.21902334324 |               |
| NM_003370    | VASP     | 1437 | 1479 | 6.21903007429 |               |

|           |        |      |      |                |
|-----------|--------|------|------|----------------|
| NM_003370 | VASP   | 523  | 551  | 5.21885632398  |
| NM_003370 | VASP   | 1316 | 1407 | 6.2190300743   |
| NM_003370 | VASP   | 431  | 498  | 7.21902983838  |
| NM_003370 | VASP   | 207  | 252  | 5.21501247412  |
| NM_003370 | VASP   | 1872 | 1943 | 5.13489086491  |
| NM_003370 | VASP   | 1509 | 1622 | 8.67846169293  |
| NM_003370 | VASP   | 627  | 694  | 5.21501247412  |
| NM_006251 | PRKAA1 | 2575 | 2642 | 6.19193009265  |
| NM_006251 | PRKAA1 | 2345 | 2406 | 6.19193658778  |
| NM_006251 | PRKAA1 | 1378 | 1439 | 6.77689932442  |
| NM_006251 | PRKAA1 | 3847 | 3900 | 6.77689259337  |
| NM_006251 | PRKAA1 | 1066 | 1173 | 8.1919368237   |
| NM_006251 | PRKAA1 | 3626 | 3726 | 6.77689932442  |
| NM_006251 | PRKAA1 | 813  | 885  | 6.77689932442  |
| NM_006251 | PRKAA1 | 1014 | 1055 | 5.18791922353  |
| NM_006251 | PRKAA1 | 1444 | 1503 | 6.19193658778  |
| NM_006251 | PRKAA1 | 4383 | 4437 | 6.19193009265  |
| NM_006251 | PRKAA1 | 1328 | 1373 | 6.18791922353  |
| NM_006251 | PRKAA1 | 2791 | 2875 | 5.1919368237   |
| NM_006251 | PRKAA1 | 1774 | 1847 | 6.77689932442  |
| NM_006251 | PRKAA1 | 3737 | 3771 | 6.69276011504  |
| NM_006251 | PRKAA1 | 646  | 777  | 7.77689932442  |
| NM_006251 | PRKAA1 | 1544 | 1661 | 8.77689932442  |
| NM_006251 | PRKAA1 | 3041 | 3104 | 5.18791922353  |
| NM_006251 | PRKAA1 | 2187 | 2288 | 6.1919368237   |
| NM_006251 | PRKAA1 | 1220 | 1327 | 7.1919368237   |
| NM_006251 | PRKAA1 | 123  | 301  | 6.77689932442  |
| NM_006251 | PRKAA1 | 315  | 482  | 8.51386491859  |
| NM_006251 | PRKAA1 | 509  | 637  | 7.1919368237   |
| NM_006252 | PRKAA2 | 772  | 840  | 7.10932989231  |
| NM_006252 | PRKAA2 | 1042 | 1116 | 7.10531229236  |
| NM_006252 | PRKAA2 | 530  | 588  | 7.10915614222  |
| NM_006252 | PRKAA2 | 334  | 389  | 7.10932316148  |
| NM_006252 | PRKAA2 | 2728 | 2786 | 7.69429239303  |
| NM_006252 | PRKAA2 | 4591 | 4689 | 6.02519068315  |
| NM_006252 | PRKAA2 | 5664 | 5739 | 6.10915614222  |
| NM_006252 | PRKAA2 | 7551 | 7609 | 6.10932316148  |
| NM_006252 | PRKAA2 | 1859 | 1941 | 7.10932965662  |
| NM_006253 | PRKAB1 | 1696 | 1744 | 8.00937349405  |
| NM_006253 | PRKAB1 | 526  | 566  | 7.08949510326  |
| NM_006253 | PRKAB1 | 736  | 786  | 8.09351246752  |
| NM_006253 | PRKAB1 | 901  | 968  | 8.59433599477  |
| NM_003374 | VDAC1  | 1150 | 1204 | 1.14996485252  |
| NM_003374 | VDAC1  | 1342 | 1411 | 1.73492735324  |
| NM_003374 | VDAC1  | 1580 | 1650 | 0.149964852516 |
| NM_003374 | VDAC1  | 1262 | 1325 | 1.73492735324  |
| NM_003374 | VDAC1  | 1650 | 1707 | 1.73492735323  |
| NM_003374 | VDAC1  | 829  | 908  | 1.73492735324  |
| NM_003374 | VDAC1  | 1848 | 1943 | 1.73492735324  |
| NM_003374 | VDAC1  | 918  | 1134 | 4.73492735324  |

|           |       |      |      |                |
|-----------|-------|------|------|----------------|
| NM_003374 | VDAC1 | 291  | 378  | 3.31988985396  |
| NM_003374 | VDAC1 | 1764 | 1824 | 1.73492735301  |
| NM_003374 | VDAC1 | 606  | 829  | 4.90485235468  |
| NM_003374 | VDAC1 | 1426 | 1537 | 3.14996485252  |
| NM_003374 | VDAC1 | 395  | 579  | 4.05685544812  |
| NM_003375 | VDAC2 | 1400 | 1442 | 3.12861626848  |
| NM_003375 | VDAC2 | 718  | 767  | 4.12861650439  |
| NM_003375 | VDAC2 | 1518 | 1566 | 4.62943979573  |
| NM_003375 | VDAC2 | 502  | 712  | 8.21607934565  |
| NM_003375 | VDAC2 | 354  | 497  | 5.1286165044   |
| NM_003375 | VDAC2 | 1271 | 1352 | 5.71357900512  |
| NM_003375 | VDAC2 | 809  | 1269 | 9.01125955376  |
| NM_139323 | YWHAB | 1028 | 1095 | 4.10308555815  |
| NM_139323 | YWHAB | 1443 | 1496 | 1.64365393951  |
| NM_139323 | YWHAB | 668  | 751  | 4.10308555815  |
| NM_139323 | YWHAB | 1769 | 1814 | 3.22861644022  |
| NM_139323 | YWHAB | 915  | 1018 | 3.81357894095  |
| NM_139323 | YWHAB | 343  | 414  | 2.64365393951  |
| NM_139323 | YWHAB | 2787 | 2934 | 3.9655820344   |
| NM_139323 | YWHAB | 1291 | 1403 | 3.45100886157  |
| NM_139323 | YWHAB | 1992 | 2109 | 1.64365393951  |
| NM_139323 | YWHAB | 2576 | 2651 | 2.22861643268  |
| NM_139323 | YWHAB | 291  | 326  | 0.64365393196  |
| NM_139323 | YWHAB | 1510 | 1601 | 3.45100886157  |
| NM_139323 | YWHAB | 2655 | 2731 | 2.64365393951  |
| NM_139323 | YWHAB | 1614 | 1739 | 4.10308555815  |
| NM_139323 | YWHAB | 751  | 915  | 4.10308555815  |
| NM_139323 | YWHAB | 1118 | 1271 | 3.45100886157  |
| NM_139323 | YWHAB | 203  | 290  | 0.643653939509 |
| NM_139323 | YWHAB | 491  | 626  | 3.45100886157  |
| NM_139323 | YWHAB | 2115 | 2499 | 5.64365393951  |
| NM_139322 | ATRN  | 1396 | 1469 | 7.21522310194  |
| NM_139322 | ATRN  | 278  | 320  | 7.70064992911  |
| NM_139322 | ATRN  | 2997 | 3045 | 6.47825750778  |
| NM_139322 | ATRN  | 173  | 220  | 4.89329500683  |
| NM_139322 | ATRN  | 1290 | 1360 | 5.89329500706  |
| NM_139322 | ATRN  | 1470 | 1582 | 7.89329500706  |
| NM_139322 | ATRN  | 2441 | 2491 | 5.89329500705  |
| NM_139322 | ATRN  | 356  | 436  | 6.47825750777  |
| NM_139322 | ATRN  | 3216 | 3281 | 7.21522310172  |
| NM_139322 | ATRN  | 74   | 118  | 4.89329499951  |
| NM_139322 | ATRN  | 2496 | 2641 | 7.70064992911  |
| NM_139322 | ATRN  | 1201 | 1288 | 8.21522310194  |
| NM_139322 | ATRN  | 3408 | 3583 | 7.21522310194  |
| NM_139322 | ATRN  | 1844 | 1938 | 7.70064992911  |
| NM_139322 | ATRN  | 3585 | 3686 | 8.35272662569  |
| NM_139322 | ATRN  | 3049 | 3191 | 7.47825750778  |
| NM_139322 | ATRN  | 1965 | 2209 | 9.28561242983  |
| NM_139322 | ATRN  | 2239 | 2411 | 7.47825750778  |
| NM_139322 | ATRN  | 1592 | 1835 | 9.0632200085   |



|              |         |      |      |               |
|--------------|---------|------|------|---------------|
| NM_139322    | ATRN    | 3296 | 3388 | 7.89329500706 |
| NM_139322    | ATRN    | 3697 | 3790 | 5.893288276   |
| NM_139322    | ATRN    | 721  | 1193 | 10.4782575078 |
| NM_139322    | ATRN    | 2645 | 2993 | 9.70064992911 |
| NM_139322    | ATRN    | 471  | 693  | 8.80018560266 |
| NM_001002017 | HCFC1R1 | 571  | 612  | 7.02317626293 |
| NM_001002017 | HCFC1R1 | 673  | 770  | 5.52235273567 |
| NM_006784    | WDR3    | 1243 | 1347 | 6.53427516059 |
| NM_006784    | WDR3    | 1908 | 1948 | 6.45013595121 |
| NM_006784    | WDR3    | 2499 | 2571 | 5.53410141027 |
| NM_006784    | WDR3    | 1678 | 1742 | 5.53427516037 |
| NM_006784    | WDR3    | 1743 | 1869 | 7.85620325548 |
| NM_006784    | WDR3    | 2571 | 2672 | 7.11923766131 |
| NM_006782    | ZFPL1   | 1032 | 1088 | 8.34990467845 |
| NM_006782    | ZFPL1   | 209  | 258  | 8.93486717917 |
| NM_006782    | ZFPL1   | 554  | 640  | 8.93504092194 |
| NM_153675    | FOXA2   | 1884 | 1926 | 3.95745801398 |
| NM_153675    | FOXA2   | 723  | 848  | 5.54643787895 |
| NM_006788    | RALBP1  | 1131 | 1211 | 3.64497531289 |
| NM_006788    | RALBP1  | 323  | 368  | 5.64899267714 |
| NM_006788    | RALBP1  | 2290 | 2351 | 4.648986182   |
| NM_006788    | RALBP1  | 3602 | 3684 | 4.64497531289 |
| NM_006788    | RALBP1  | 2684 | 2767 | 4.64899291284 |
| NM_006788    | RALBP1  | 2188 | 2253 | 3.64881916274 |
| NM_006788    | RALBP1  | 3012 | 3081 | 3.64899267714 |
| NM_004447    | EPS8    | 2455 | 2575 | 7.34736099435 |
| NM_004447    | EPS8    | 1386 | 1443 | 6.61039516426 |
| NM_004447    | EPS8    | 3684 | 3784 | 5.02542616841 |
| NM_004447    | EPS8    | 2654 | 2749 | 6.61039540018 |
| NM_004447    | EPS8    | 1443 | 1534 | 7.61039540018 |
| NM_004447    | EPS8    | 3505 | 3551 | 6.61022164986 |
| NM_004447    | EPS8    | 3321 | 3377 | 6.02543289945 |
| NM_004447    | EPS8    | 3080 | 3122 | 5.02141529929 |
| NM_004447    | EPS8    | 2304 | 2378 | 6.02542616841 |
| NM_004447    | EPS8    | 2590 | 2641 | 5.02525914914 |
| NM_004447    | EPS8    | 212  | 274  | 4.94129369008 |
| NM_004447    | EPS8    | 459  | 549  | 6.61039540018 |
| NM_004447    | EPS8    | 2385 | 2450 | 6.02542616841 |
| NM_004447    | EPS8    | 328  | 428  | 5.02141529929 |
| NM_004447    | EPS8    | 2026 | 2295 | 9.11289574071 |
| NM_004447    | EPS8    | 625  | 799  | 8.93232349507 |
| NM_004447    | EPS8    | 1729 | 1838 | 6.02543289946 |
| NM_004447    | EPS8    | 1580 | 1707 | 6.61039540018 |
| NM_004872    | TMEM59  | 1519 | 1577 | 5.51211737327 |
| NM_004872    | TMEM59  | 1251 | 1286 | 4.84703326334 |
| NM_004872    | TMEM59  | 938  | 1251 | 9.65909292729 |
| NM_004872    | TMEM59  | 582  | 819  | 8.83806306833 |
| NM_004872    | TMEM59  | 867  | 937  | 5.93117223681 |
| NM_004872    | TMEM59  | 1286 | 1504 | 8.17909998617 |
| NM_004872    | TMEM59  | 336  | 565  | 8.78915346785 |

|              |        |      |      |               |
|--------------|--------|------|------|---------------|
| NM_004870    | MPDU1  | 734  | 820  | 9.02311068465 |
| NM_004870    | MPDU1  | 1504 | 1589 | 8.60807318537 |
| NM_004870    | MPDU1  | 822  | 1132 | 11.6080731854 |
| NM_004870    | MPDU1  | 214  | 523  | 11.5466726407 |
| NM_004870    | MPDU1  | 1174 | 1374 | 9.60807318537 |
| NM_004870    | MPDU1  | 526  | 724  | 11.4154281074 |
| NM_012247    | SEPHS1 | 593  | 711  | 6.43412384117 |
| NM_012247    | SEPHS1 | 1987 | 2048 | 4.6265951688  |
| NM_012247    | SEPHS1 | 411  | 471  | 5.21173118392 |
| NM_012247    | SEPHS1 | 2054 | 2123 | 4.62676891156 |
| NM_012247    | SEPHS1 | 1159 | 1215 | 5.21173141984 |
| NM_012247    | SEPHS1 | 2529 | 2603 | 5.21173141984 |
| NM_012247    | SEPHS1 | 1302 | 1406 | 5.62676891911 |
| NM_012247    | SEPHS1 | 773  | 882  | 4.62676891911 |
| NM_012247    | SEPHS1 | 1432 | 1514 | 3.62676891889 |
| NM_012247    | SEPHS1 | 1000 | 1098 | 5.62676891911 |
| NM_004879    | EI24   | 1155 | 1207 | 6.63289556043 |
| NM_004879    | EI24   | 1033 | 1069 | 6.63288882938 |
| NM_004879    | EI24   | 1622 | 1704 | 6.04793305971 |
| NM_004879    | EI24   | 1232 | 1282 | 6.04391545954 |
| NM_004879    | EI24   | 153  | 218  | 5.96379385033 |
| NM_004879    | EI24   | 1526 | 1597 | 6.63289556043 |
| NM_004879    | EI24   | 1770 | 1826 | 4.96379385033 |
| NM_004879    | EI24   | 769  | 970  | 9.04793305971 |
| NM_004879    | EI24   | 220  | 288  | 7.04793305971 |
| NM_004879    | EI24   | 1381 | 1473 | 6.63289556043 |
| NM_004879    | EI24   | 523  | 743  | 8.50736467835 |
| NM_004879    | EI24   | 2003 | 2097 | 5.04793305216 |
| NM_020197    | SMYD2  | 1567 | 1599 | 3.06839651672 |
| NM_020197    | SMYD2  | 1381 | 1442 | 3.15253572611 |
| NM_020197    | SMYD2  | 1453 | 1516 | 5.15253549019 |
| NM_020197    | SMYD2  | 964  | 1052 | 5.15253571856 |
| NM_020197    | SMYD2  | 310  | 376  | 3.14851812593 |
| NM_020197    | SMYD2  | 588  | 660  | 4.73348062665 |
| NM_001135095 | FNDC3B | 459  | 574  | 5.57051737918 |
| NM_001135095 | FNDC3B | 1778 | 1829 | 4.98555487091 |
| NM_001135095 | FNDC3B | 235  | 278  | 4.98555487824 |
| NM_001135095 | FNDC3B | 1976 | 2099 | 6.79290980052 |
| NM_001135095 | FNDC3B | 5690 | 5747 | 3.98554814741 |
| NM_001135095 | FNDC3B | 4553 | 4625 | 5.57051737896 |
| NM_001135095 | FNDC3B | 1438 | 1482 | 3.98555487091 |
| NM_001135095 | FNDC3B | 5002 | 5080 | 5.57051737163 |
| NM_001135095 | FNDC3B | 3424 | 3542 | 4.98555487846 |
| NM_001135095 | FNDC3B | 2976 | 3015 | 4.98555487091 |
| NM_001135095 | FNDC3B | 4131 | 4179 | 4.90141566908 |
| NM_001135095 | FNDC3B | 4919 | 4998 | 5.57051737918 |
| NM_001135095 | FNDC3B | 3796 | 3832 | 4.98555464254 |
| NM_001135095 | FNDC3B | 4003 | 4040 | 3.90141566908 |
| NM_001135095 | FNDC3B | 1915 | 1970 | 4.98555464254 |
| NM_001135095 | FNDC3B | 6335 | 6391 | 5.57051064813 |

|              |        |      |      |                 |
|--------------|--------|------|------|-----------------|
| NM_001135095 | FNDC3B | 4304 | 4361 | 3.98554814741   |
| NM_001135095 | FNDC3B | 969  | 1025 | 3.98555487824   |
| NM_001135095 | FNDC3B | 354  | 399  | 4.98538112814   |
| NM_001135095 | FNDC3B | 640  | 729  | 4.98555487846   |
| NM_001135095 | FNDC3B | 3043 | 3098 | 5.57051737918   |
| NM_001135095 | FNDC3B | 77   | 211  | 6.79290980052   |
| NM_001135095 | FNDC3B | 2873 | 2963 | 6.30748297335   |
| NM_001135095 | FNDC3B | 1041 | 1222 | 6.57051737918   |
| NM_001135095 | FNDC3B | 3330 | 3422 | 4.98555487846   |
| NM_001135095 | FNDC3B | 5520 | 5607 | 3.98555487846   |
| NM_001135095 | FNDC3B | 2723 | 2838 | 7.30748297335   |
| NM_001135095 | FNDC3B | 2209 | 2713 | 8.89244547407   |
| NM_001135095 | FNDC3B | 858  | 943  | 3.98555487824   |
| NM_012245    | SNW1   | 271  | 337  | 3.74301189706   |
| NM_012245    | SNW1   | 1241 | 1301 | 4.82714437539   |
| NM_012245    | SNW1   | 1365 | 1436 | 3.82715087053   |
| NM_001199671 | CALU   | 90   | 141  | 0.700874853299  |
| NM_001199671 | CALU   | 3656 | 3700 | 0.700874853305  |
| NM_001199671 | CALU   | 4705 | 4747 | 0.700868122251  |
| NM_001199671 | CALU   | 3595 | 3656 | 2.02280294819   |
| NM_001199671 | CALU   | 3374 | 3412 | -0.299125382614 |
| NM_001199671 | CALU   | 1357 | 1493 | 3.94880236675   |
| NM_001199671 | CALU   | 4040 | 4164 | 4.02280294819   |
| NM_001199671 | CALU   | 3720 | 3786 | 1.28583735403   |
| NM_001199671 | CALU   | 3011 | 3152 | 3.78833769456   |
| NM_001199671 | CALU   | 1950 | 2277 | 5.34473104308   |
| NM_001199671 | CALU   | 3855 | 3899 | -0.299298897013 |
| NM_001199671 | CALU   | 1074 | 1351 | 4.78833769456   |
| NM_001199671 | CALU   | 3415 | 3521 | 0.700874853305  |
| NM_001199671 | CALU   | 4435 | 4520 | -0.299125146695 |
| NM_001199671 | CALU   | 2296 | 2361 | -0.299125146695 |
| NM_001199671 | CALU   | 2525 | 2830 | 4.28583735403   |
| NM_001199671 | CALU   | 3164 | 3323 | 3.02280294819   |
| NM_001199671 | CALU   | 954  | 1072 | 3.87079985475   |
| NM_001199671 | CALU   | 2857 | 3011 | 1.28583735403   |
| NM_001199671 | CALU   | 1496 | 1941 | 5.12713960801   |
| NM_024989    | PGAP1  | 1347 | 1378 | 10.0432035092   |
| NM_024989    | PGAP1  | 259  | 306  | 9.03935965936   |
| NM_024989    | PGAP1  | 762  | 811  | 9.04320350921   |
| NM_024989    | PGAP1  | 827  | 885  | 9.04320350921   |
| NM_024989    | PGAP1  | 2111 | 2231 | 12.0433772595   |
| NM_024989    | PGAP1  | 2649 | 2729 | 9.04337052848   |
| NM_020196    | XAB2   | 1232 | 1290 | 7.08661946999   |
| NM_020196    | XAB2   | 1529 | 1617 | 7.67158220663   |
| NM_020196    | XAB2   | 1763 | 1823 | 7.08661297486   |
| NM_020196    | XAB2   | 1146 | 1185 | 6.08661297486   |
| NM_020196    | XAB2   | 2469 | 2541 | 7.08661297486   |
| NM_020196    | XAB2   | 54   | 148  | 7.67158220663   |
| NM_020196    | XAB2   | 677  | 736  | 6.00248049653   |
| NM_020196    | XAB2   | 773  | 905  | 8.4085478008    |

|              |        |      |      |               |
|--------------|--------|------|------|---------------|
| NM_000170    | GLDC   | 2275 | 2384 | 7.70358077222 |
| NM_000170    | GLDC   | 2669 | 2752 | 6.11861803558 |
| NM_000170    | GLDC   | 3353 | 3398 | 6.11861154045 |
| NM_000170    | GLDC   | 1390 | 1469 | 6.1186182715  |
| NM_000170    | GLDC   | 630  | 669  | 6.70357404117 |
| NM_000170    | GLDC   | 1002 | 1142 | 7.1186182715  |
| NM_000170    | GLDC   | 1302 | 1353 | 5.11460067133 |
| NM_000170    | GLDC   | 1964 | 2040 | 7.92597319356 |
| NM_000170    | GLDC   | 3268 | 3316 | 6.7035805363  |
| NM_000170    | GLDC   | 2905 | 2970 | 5.03447906212 |
| NM_000170    | GLDC   | 845  | 932  | 6.1186182715  |
| NM_000170    | GLDC   | 2050 | 2094 | 6.70340702191 |
| NM_000170    | GLDC   | 3409 | 3505 | 7.1186182715  |
| NM_000170    | GLDC   | 451  | 559  | 7.1186182715  |
| NM_000170    | GLDC   | 1510 | 1704 | 8.1186182715  |
| NM_000170    | GLDC   | 2765 | 2877 | 7.44054636639 |
| NM_000170    | GLDC   | 1865 | 1963 | 7.1186182715  |
| NM_000175    | GPI    | 167  | 280  | 5.19424723882 |
| NM_000175    | GPI    | 88   | 163  | 4.19424723882 |
| NM_000175    | GPI    | 3477 | 3518 | 3.60911098778 |
| NM_000175    | GPI    | 2129 | 2200 | 2.60928450218 |
| NM_000175    | GPI    | 1454 | 1583 | 4.93121283298 |
| NM_000175    | GPI    | 1812 | 1961 | 6.41663966015 |
| NM_000175    | GPI    | 1983 | 2119 | 6.77920973954 |
| NM_000175    | GPI    | 2281 | 2406 | 3.6092847381  |
| NM_000175    | GPI    | 3936 | 4048 | 3.60928450218 |
| NM_000175    | GPI    | 281  | 788  | 8.06871635673 |
| NM_000175    | GPI    | 1584 | 1803 | 6.93121283298 |
| NM_000175    | GPI    | 791  | 1206 | 7.6092847381  |
| NM_000175    | GPI    | 1224 | 1403 | 5.6092847381  |
| NM_000175    | GPI    | 2976 | 3056 | 3.60928473787 |
| NM_000175    | GPI    | 2500 | 2602 | 4.93121283298 |
| NM_000175    | GPI    | 2408 | 2473 | 3.60526713792 |
| NM_000175    | GPI    | 2839 | 2903 | 2.60928450218 |
| NM_032940    | POLR2C | 992  | 1053 | 5.869513272   |
| NM_032940    | POLR2C | 294  | 371  | 5.86951350792 |
| NM_032940    | POLR2C | 108  | 161  | 5.28437725688 |
| NM_032940    | POLR2C | 1184 | 1319 | 7.2845510072  |
| NM_032940    | POLR2C | 765  | 857  | 6.28455100719 |
| NM_015474    | SAMHD1 | 863  | 913  | 6.35104965516 |
| NM_001170937 | FUS    | 32   | 158  | 4.50829765216 |
| NM_001170937 | FUS    | 1487 | 1572 | 4.50829765216 |
| NM_001170937 | FUS    | 509  | 597  | 4.99372447933 |
| NM_001170937 | FUS    | 422  | 464  | 3.18636954973 |
| NM_001170937 | FUS    | 3346 | 3415 | 2.18636955727 |
| NM_001170937 | FUS    | 1592 | 1835 | 6.99372447933 |
| NM_001170937 | FUS    | 176  | 412  | 5.771332058   |
| NM_001170937 | FUS    | 1297 | 1430 | 5.18636955727 |
| NM_001170937 | FUS    | 794  | 1295 | 7.80107940139 |
| NM_004193    | GBF1   | 4955 | 5046 | 7.27726628512 |

|           |        |      |      |               |
|-----------|--------|------|------|---------------|
| NM_004193 | GBF1   | 4506 | 4571 | 7.27726628512 |
| NM_004193 | GBF1   | 5391 | 5451 | 8.59919438001 |
| NM_004193 | GBF1   | 1786 | 1834 | 7.27726628512 |
| NM_004193 | GBF1   | 1897 | 2039 | 7.86222878584 |
| NM_004193 | GBF1   | 4322 | 4388 | 7.86222878584 |
| NM_004193 | GBF1   | 5061 | 5116 | 7.27726628512 |
| NM_004193 | GBF1   | 2267 | 2308 | 6.27726627757 |
| NM_004193 | GBF1   | 4404 | 4497 | 7.86222878584 |
| NM_004193 | GBF1   | 4852 | 4910 | 6.27324868495 |
| NM_004193 | GBF1   | 1353 | 1422 | 7.27726627757 |
| NM_004193 | GBF1   | 5755 | 5807 | 6.2770925348  |
| NM_004193 | GBF1   | 746  | 812  | 6.27725955406 |
| NM_004193 | GBF1   | 3233 | 3281 | 6.27324868495 |
| NM_004193 | GBF1   | 1195 | 1232 | 7.19312707573 |
| NM_004193 | GBF1   | 1544 | 1622 | 7.27726627757 |
| NM_004193 | GBF1   | 5150 | 5273 | 9.73669790376 |
| NM_004193 | GBF1   | 2961 | 3015 | 6.27726628512 |
| NM_004193 | GBF1   | 4201 | 4269 | 7.27726628512 |
| NM_004193 | GBF1   | 3046 | 3126 | 8.27726628512 |
| NM_004193 | GBF1   | 6185 | 6232 | 7.2770925348  |
| NM_004193 | GBF1   | 2821 | 2922 | 6.27726628512 |
| NM_004193 | GBF1   | 3687 | 3875 | 10.0846212072 |
| NM_004193 | GBF1   | 2502 | 2651 | 9.73669790376 |
| NM_004193 | GBF1   | 3426 | 3496 | 7.2772660492  |
| NM_004193 | GBF1   | 4717 | 4821 | 7.86222878584 |
| NM_004193 | GBF1   | 371  | 583  | 9.44719128656 |
| NM_004193 | GBF1   | 5928 | 6029 | 7.27726627757 |
| NM_004193 | GBF1   | 1089 | 1142 | 6.19312707573 |
| NM_006435 | IFITM2 | 498  | 643  | 9.0147607243  |
| NM_006435 | IFITM2 | 321  | 424  | 9.27779513013 |
| NM_006435 | IFITM2 | 206  | 318  | 9.50018755147 |
| NM_003156 | STIM1  | 319  | 383  | 6.28356095915 |
| NM_003156 | STIM1  | 2055 | 2109 | 6.28355423565 |
| NM_003156 | STIM1  | 3810 | 3849 | 6.86450586725 |
| NM_003156 | STIM1  | 1071 | 1113 | 6.28338721638 |
| NM_003156 | STIM1  | 1931 | 2017 | 6.2835609667  |
| NM_003156 | STIM1  | 3021 | 3102 | 7.2835609667  |
| NM_003156 | STIM1  | 538  | 572  | 5.28355423565 |
| NM_003156 | STIM1  | 390  | 439  | 5.28356095915 |
| NM_003156 | STIM1  | 776  | 839  | 5.28338721638 |
| NM_003156 | STIM1  | 2179 | 2236 | 6.28355423565 |
| NM_003156 | STIM1  | 1114 | 1251 | 7.86852346742 |
| NM_003156 | STIM1  | 2844 | 2925 | 6.86852346742 |
| NM_003156 | STIM1  | 24   | 81   | 5.28338721638 |
| NM_003156 | STIM1  | 2931 | 3017 | 7.2835609667  |
| NM_003156 | STIM1  | 1278 | 1361 | 7.2835609667  |
| NM_003156 | STIM1  | 639  | 695  | 5.19942175732 |
| NM_003156 | STIM1  | 3115 | 3180 | 5.28355423565 |
| NM_003156 | STIM1  | 899  | 1048 | 8.45348596814 |
| NM_003156 | STIM1  | 1750 | 1803 | 6.86851673637 |

|           |       |      |      |               |
|-----------|-------|------|------|---------------|
| NM_003156 | STIM1 | 183  | 277  | 5.2835609667  |
| NM_003156 | STIM1 | 2275 | 2359 | 5.28355423565 |
| NM_003156 | STIM1 | 2444 | 2568 | 7.60548906137 |
| NM_006437 | PARP4 | 2211 | 2259 | 6.63490707498 |
| NM_006437 | PARP4 | 1053 | 1135 | 6.6389179441  |
| NM_006437 | PARP4 | 2513 | 2556 | 6.04994457426 |
| NM_006437 | PARP4 | 4128 | 4172 | 5.05378842412 |
| NM_006437 | PARP4 | 350  | 415  | 6.05378842412 |
| NM_006437 | PARP4 | 3656 | 3727 | 6.63892443924 |
| NM_006437 | PARP4 | 3221 | 3293 | 6.63892443924 |
| NM_006437 | PARP4 | 1480 | 1551 | 5.05396193851 |
| NM_006437 | PARP4 | 5133 | 5224 | 5.05396217443 |
| NM_003150 | STAT3 | 1490 | 1571 | 6.13001627608 |
| NM_003150 | STAT3 | 984  | 1086 | 5.80808818119 |
| NM_003150 | STAT3 | 896  | 961  | 5.3930506819  |
| NM_003150 | STAT3 | 299  | 360  | 4.80808818097 |
| NM_003150 | STAT3 | 1958 | 2014 | 3.80808817364 |
| NM_003150 | STAT3 | 4531 | 4656 | 6.13001627608 |
| NM_003150 | STAT3 | 418  | 454  | 3.80407058102 |
| NM_003150 | STAT3 | 223  | 286  | 3.80791443087 |
| NM_003150 | STAT3 | 2220 | 2312 | 4.80808818097 |
| NM_003150 | STAT3 | 2156 | 2207 | 4.72394897181 |
| NM_003150 | STAT3 | 1315 | 1416 | 6.39305068191 |
| NM_003150 | STAT3 | 2647 | 2776 | 5.39305068191 |
| NM_003150 | STAT3 | 663  | 815  | 5.80808818119 |
| NM_003150 | STAT3 | 3282 | 3329 | 3.80791443087 |
| NM_003150 | STAT3 | 2329 | 2463 | 6.13001627608 |
| NM_003150 | STAT3 | 3048 | 3135 | 4.80808818097 |
| NM_003150 | STAT3 | 2858 | 2943 | 5.80808818119 |
| NM_003150 | STAT3 | 2493 | 2626 | 5.39305068191 |
| NM_003150 | STAT3 | 1572 | 1933 | 7.7149787768  |
| NM_003150 | STAT3 | 3659 | 3778 | 5.80808818119 |
| NM_003150 | STAT3 | 3468 | 3552 | 4.80791443087 |
| NM_006431 | CCT2  | 235  | 293  | 4.94469011581 |
| NM_006431 | CCT2  | 28   | 126  | 5.62276202093 |
| NM_006431 | CCT2  | 1485 | 1559 | 5.20772452165 |
| NM_006431 | CCT2  | 131  | 234  | 5.43011694298 |
| NM_006431 | CCT2  | 1083 | 1207 | 5.62276202093 |
| NM_006431 | CCT2  | 978  | 1080 | 5.43011694298 |
| NM_006431 | CCT2  | 1570 | 1850 | 7.32320173907 |
| NM_006431 | CCT2  | 1208 | 1401 | 6.43011694298 |
| NM_006431 | CCT2  | 318  | 457  | 5.94469011581 |
| NM_006431 | CCT2  | 845  | 963  | 4.20772452165 |
| NM_006431 | CCT2  | 1406 | 1464 | 3.62258827061 |
| NM_006431 | CCT2  | 457  | 700  | 6.71022486218 |
| NM_006432 | NPC2  | 817  | 882  | 7.32546280515 |
| NM_006432 | NPC2  | 330  | 457  | 8.91042530587 |
| NM_006432 | NPC2  | 56   | 126  | 7.32546280515 |
| NM_006432 | NPC2  | 143  | 261  | 8.74050030443 |
| NM_006432 | NPC2  | 458  | 764  | 10.8279631457 |

|              |         |      |      |               |
|--------------|---------|------|------|---------------|
| NM_001197293 | DPYSL2  | 1667 | 1739 | 5.70611858527 |
| NM_001197293 | DPYSL2  | 2163 | 2248 | 6.70629233537 |
| NM_001197293 | DPYSL2  | 2960 | 3011 | 7.70629233559 |
| NM_001197293 | DPYSL2  | 2249 | 2310 | 7.29125483631 |
| NM_001197293 | DPYSL2  | 1162 | 1231 | 5.70611858527 |
| NM_001197293 | DPYSL2  | 3307 | 3353 | 7.29108108599 |
| NM_001197293 | DPYSL2  | 4336 | 4381 | 5.70227473542 |
| NM_001197293 | DPYSL2  | 827  | 865  | 6.62215312621 |
| NM_001197293 | DPYSL2  | 1792 | 1855 | 5.70629233537 |
| NM_001197293 | DPYSL2  | 1513 | 1560 | 5.62215312621 |
| NM_001197293 | DPYSL2  | 1344 | 1422 | 6.70629233559 |
| NM_001197293 | DPYSL2  | 668  | 804  | 8.29125483631 |
| NM_020310    | MNT     | 4593 | 4663 | 8.26722280851 |
| NM_020313    | CIAPIN1 | 808  | 851  | 4.75972688402 |
| NM_020313    | CIAPIN1 | 182  | 288  | 5.75972711972 |
| NM_020313    | CIAPIN1 | 1392 | 1477 | 5.75972711239 |
| NM_001206710 | PRKAG1  | 307  | 388  | 7.91260568342 |
| NM_001206710 | PRKAG1  | 634  | 718  | 7.91260568342 |
| NM_020315    | PDXP    | 902  | 951  | 7.50192863113 |
| NM_020315    | PDXP    | 365  | 404  | 7.50192863113 |
| NM_020315    | PDXP    | 1585 | 1637 | 8.50192863113 |
| NM_020315    | PDXP    | 1246 | 1338 | 9.09090873202 |
| NM_020315    | PDXP    | 1189 | 1246 | 8.50192863113 |
| NM_020317    | C1orf63 | 1085 | 1144 | 5.17878848158 |
| NM_020317    | C1orf63 | 1300 | 1460 | 4.17878848158 |
| NM_020317    | C1orf63 | 332  | 386  | 4.0946492722  |
| NM_001113361 | TBC1D14 | 4461 | 4507 | 6.51231546404 |
| NM_001113361 | TBC1D14 | 4507 | 4557 | 5.51633306421 |
| NM_001113361 | TBC1D14 | 497  | 554  | 5.43219385483 |
| NM_001113361 | TBC1D14 | 1335 | 1370 | 7.01715635555 |
| NM_001113361 | TBC1D14 | 3123 | 3193 | 7.51632633316 |
| NM_001113361 | TBC1D14 | 3844 | 3898 | 5.43219385483 |
| NM_001113361 | TBC1D14 | 3987 | 4047 | 5.51615931389 |
| NM_001113361 | TBC1D14 | 3277 | 3405 | 7.51633306421 |
| NM_001113361 | TBC1D14 | 1461 | 1525 | 7.51633306421 |
| NM_001113361 | TBC1D14 | 63   | 169  | 7.8382611591  |
| NM_001113361 | TBC1D14 | 178  | 281  | 5.51633306421 |
| NM_001113361 | TBC1D14 | 903  | 1110 | 6.51633306421 |
| NM_001113361 | TBC1D14 | 2512 | 2730 | 8.51633306421 |
| NM_001113361 | TBC1D14 | 4642 | 4761 | 6.51633306421 |
| NM_001113361 | TBC1D14 | 1783 | 1978 | 8.32368798627 |
| NM_001113361 | TBC1D14 | 1157 | 1329 | 7.8382611591  |
| NM_001113361 | TBC1D14 | 3588 | 3724 | 8.10129556493 |
| NM_001004301 | ZNF813  | 196  | 278  | 10.148894372  |
| NM_001004301 | ZNF813  | 154  | 192  | 10.144876772  |
| NM_001969    | EIF5    | 543  | 652  | 5.48062469939 |
| NM_001969    | EIF5    | 3216 | 3269 | 3.22656048856 |
| NM_001969    | EIF5    | 249  | 314  | 3.31069969773 |
| NM_001969    | EIF5    | 3716 | 3816 | 4.63262779284 |
| NM_001969    | EIF5    | 724  | 808  | 4.31069946203 |

|              |             |      |      |               |               |
|--------------|-------------|------|------|---------------|---------------|
| NM_001969    | EIF5        | 2716 | 2776 | 3.8916445985  |               |
| NM_001969    | EIF5        | 1063 | 1154 | 4.89566219867 |               |
| NM_001969    | EIF5        | 1617 | 1662 | 3.89565546762 |               |
| NM_001969    | EIF5        | 353  | 406  | 4.31069969795 |               |
| NM_001969    | EIF5        | 2903 | 2945 | 3.22656048856 |               |
| NM_001969    | EIF5        | 3838 | 3913 | 2.3106996904  |               |
| NM_001969    | EIF5        | 2989 | 3058 | 3.30668209778 |               |
| NM_001969    | EIF5        | 876  | 1008 | 6.31069969795 |               |
| NM_001969    | EIF5        | 1426 | 1586 | 3.89566219867 |               |
| NM_001969    | EIF5        | 407  | 506  | 3.31069969795 |               |
| NM_001969    | EIF5        | 1719 | 1809 | 3.89566219867 |               |
| NM_001969    | EIF5        | 664  | 720  | 2.31069946203 |               |
| NM_001969    | EIF5        | 1812 | 1996 | 5.48062469939 |               |
| NM_001969    | EIF5        | 1258 | 1368 | 3.31069969795 |               |
| NM_139119    | YY1AP1      | 2495 | 2551 | 6.03302209606 |               |
| NM_139119    | YY1AP1      | 279  | 369  | 5.44805959533 |               |
| NM_139119    | YY1AP1      | 2445 | 2490 | 5.44805935942 |               |
| NM_139119    | YY1AP1      | 1070 | 1139 | 6.03302209606 |               |
| NM_139119    | YY1AP1      | 1269 | 1392 | 6.76998769022 |               |
| NM_139119    | YY1AP1      | 2187 | 2235 | 6.02900449588 |               |
| NM_139119    | YY1AP1      | 644  | 721  | 4.44805958778 |               |
| NM_139119    | YY1AP1      | 930  | 1053 | 6.03302209606 |               |
| NM_139119    | YY1AP1      | 2314 | 2383 | 4.44805959511 |               |
| NM_139119    | YY1AP1      | 1711 | 1801 | 6.44805959533 |               |
| NM_139119    | YY1AP1      | 185  | 273  | 5.44805286428 |               |
| NM_139119    | YY1AP1      | 2029 | 2174 | 7.61798459678 |               |
| NM_139119    | YY1AP1      | 735  | 858  | 6.03302209606 |               |
| NM_139119    | YY1AP1      | 1879 | 1971 | 6.44805959533 |               |
| NM_001968    | EIF4E       | 2645 | 2689 | 2.6441861518  |               |
| NM_001968    | EIF4E       | 2423 | 2495 | 1.64418638771 |               |
| NM_001968    | EIF4E       | 1685 | 2055 | 5.81411138916 |               |
| NM_001202485 | HSPE1-PHOCN |      | 552  | 607           | 7.05893948925 |
| NM_001202485 | HSPE1-PHOCN |      | 791  | 849           | 5.97480027987 |
| NM_001202485 | HSPE1-PHOCN |      | 1107 | 1182          | 4.46995938836 |
| NM_001202485 | HSPE1-PHOCN |      | 353  | 543           | 8.38086758414 |
| NM_001040446 | MTMR12      | 1536 | 1606 | 7.17094635131 |               |
| NM_001040446 | MTMR12      | 3834 | 3884 | 6.16710250145 |               |
| NM_001040446 | MTMR12      | 4047 | 4122 | 7.75608260235 |               |
| NM_001040446 | MTMR12      | 3366 | 3426 | 7.16710250145 |               |
| NM_001040446 | MTMR12      | 1173 | 1249 | 6.08698089224 |               |
| NM_001040446 | MTMR12      | 4212 | 4275 | 6.16710250145 |               |
| NM_001040446 | MTMR12      | 4879 | 4974 | 7.17112010162 |               |
| NM_001040446 | MTMR12      | 418  | 470  | 7.75608236643 |               |
| NM_001040446 | MTMR12      | 477  | 566  | 7.75206500217 |               |
| NM_001040446 | MTMR12      | 2519 | 2634 | 6.17112009408 |               |
| NM_001040446 | MTMR12      | 1352 | 1417 | 8.17112010162 |               |
| NM_001040446 | MTMR12      | 3116 | 3228 | 7.17112010162 |               |
| NM_001040443 | PHF11       | 1445 | 1530 | 7.34547899531 |               |
| NM_001040443 | PHF11       | 0    | 80   | 6.76453409476 |               |
| NM_001040443 | PHF11       | 519  | 580  | 6.76453408721 |               |



|              |          |      |      |                   |
|--------------|----------|------|------|-------------------|
| NM_001040441 | ZBTB8A   | 3977 | 4027 | 8.9959221404      |
| NM_001040441 | ZBTB8A   | 4734 | 4830 | 10.0800613498     |
| NM_013241    | FHOD1    | 769  | 857  | 7.00090130156     |
| NM_013241    | FHOD1    | 1746 | 1811 | 6.99688370138     |
| NM_013241    | FHOD1    | 2356 | 2441 | 8.58184620211     |
| NM_013241    | FHOD1    | 3418 | 3475 | 8.0008945705      |
| NM_005765    | ATP6AP2  | 1912 | 2000 | 6.39805412357     |
| NM_005765    | ATP6AP2  | 1535 | 1593 | 6.39805413089     |
| NM_005765    | ATP6AP2  | 858  | 902  | 5.39403653094     |
| NM_005765    | ATP6AP2  | 1626 | 1728 | 8.39805413111     |
| NM_005765    | ATP6AP2  | 1398 | 1447 | 5.39805413089     |
| NM_005765    | ATP6AP2  | 539  | 697  | 9.79037155389     |
| NM_005765    | ATP6AP2  | 1259 | 1360 | 8.39805413111     |
| NM_005765    | ATP6AP2  | 908  | 1223 | 10.4424482505     |
| NM_005765    | ATP6AP2  | 706  | 858  | 9.39805413111     |
| NM_005765    | ATP6AP2  | 381  | 534  | 9.09849384926     |
| NM_005765    | ATP6AP2  | 1747 | 1882 | 7.719982226       |
| NM_005765    | ATP6AP2  | 99   | 379  | 9.85748574975     |
| NM_013242    | C16orf80 |      | 912  | 976 3.30000290694 |
| NM_013245    | VPS4A    | 1187 | 1234 | 4.1236892241      |
| NM_013245    | VPS4A    | 1928 | 1980 | 5.11984537425     |
| NM_013245    | VPS4A    | 498  | 562  | 4.11984537425     |
| NM_013245    | VPS4A    | 692  | 779  | 4.12386297442     |
| NM_013245    | VPS4A    | 155  | 215  | 4.11984537425     |
| NM_013245    | VPS4A    | 1290 | 1354 | 4.03972376504     |
| NM_013245    | VPS4A    | 906  | 994  | 4.1238627385      |
| NM_013248    | NXT1     | 369  | 451  | 8.06681357885     |
| NM_013248    | NXT1     | 907  | 979  | 8.64775871532     |
| NM_014026    | DCPS     | 937  | 992  | 7.70596355551     |
| NM_005766    | FARP1    | 871  | 958  | 3.16358318229     |
| NM_005766    | FARP1    | 2273 | 2359 | 2.16358294659     |
| NM_005766    | FARP1    | 681  | 724  | 3.74854567568     |
| NM_005766    | FARP1    | 1287 | 1392 | 4.4855112774      |
| NM_005766    | FARP1    | 2565 | 2640 | 3.74854568323     |
| NM_005766    | FARP1    | 755  | 834  | 3.16358318251     |
| NM_005766    | FARP1    | 641  | 679  | 2.07944397312     |
| NM_005766    | FARP1    | 1837 | 1878 | 2.07944397312     |
| NM_005766    | FARP1    | 4069 | 4109 | 2.07944397312     |
| NM_005766    | FARP1    | 983  | 1085 | 2.16358318251     |
| NM_005766    | FARP1    | 2714 | 2799 | 3.74854568322     |
| NM_005766    | FARP1    | 1961 | 2036 | 2.15956558234     |
| NM_005766    | FARP1    | 2101 | 2201 | 3.74854568323     |
| NM_005766    | FARP1    | 3349 | 3415 | 3.16357645145     |
| NM_005766    | FARP1    | 470  | 547  | 2.16358318251     |
| NM_014021    | SSX2IP   | 2153 | 2203 | 8.30135127871     |
| NM_014028    | OSTM1    | 533  | 590  | 9.40918043353     |
| NM_014028    | OSTM1    | 1339 | 1438 | 7.82421143768     |
| NM_014028    | OSTM1    | 753  | 798  | 9.4091739384      |
| NM_014028    | OSTM1    | 650  | 704  | 8.82421816118     |
| NM_014028    | OSTM1    | 399  | 530  | 10.4091806695     |

|              |       |       |       |               |
|--------------|-------|-------|-------|---------------|
| NM_014028    | OSTM1 | 222   | 371   | 10.1461462636 |
| NM_014028    | OSTM1 | 2581  | 2637  | 7.82020056856 |
| NM_014028    | OSTM1 | 924   | 1055  | 11.2836497874 |
| NM_014028    | OSTM1 | 804   | 923   | 10.4091806695 |
| NM_014028    | OSTM1 | 1116  | 1278  | 10.6315730908 |
| NM_018217    | EDEM2 | 629   | 719   | 8.86215336067 |
| NM_018217    | EDEM2 | 380   | 437   | 7.86215336067 |
| NM_018217    | EDEM2 | 948   | 1007  | 6.86197961035 |
| NM_018217    | EDEM2 | 1212  | 1278  | 6.8581357605  |
| NM_018217    | EDEM2 | 247   | 376   | 10.0320783621 |
| NM_018217    | EDEM2 | 1352  | 1424  | 8.86215336045 |
| NM_018216    | PANK4 | 243   | 341   | 7.59061480821 |
| NM_018216    | PANK4 | 2412  | 2447  | 7.59445865807 |
| NM_018216    | PANK4 | 1310  | 1358  | 8.59463240084 |
| NM_001145971 | RDH13 | 706   | 761   | 8.53558615654 |
| NM_015374    | SUN2  | 2581  | 2641  | 5.7888566896  |
| NM_015374    | SUN2  | 3715  | 3765  | 7.11095853481 |
| NM_015374    | SUN2  | 2340  | 2414  | 5.78903043992 |
| NM_015374    | SUN2  | 3196  | 3240  | 4.78501283975 |
| NM_015374    | SUN2  | 2493  | 2564  | 6.37399294064 |
| NM_015374    | SUN2  | 3117  | 3188  | 5.78903043992 |
| NM_015374    | SUN2  | 2103  | 2154  | 6.37399294064 |
| NM_015374    | SUN2  | 3026  | 3116  | 6.78903043992 |
| NM_015374    | SUN2  | 235   | 309   | 4.789030204   |
| NM_015374    | SUN2  | 1726  | 1812  | 6.37399294064 |
| NM_015374    | SUN2  | 3460  | 3671  | 7.78903043992 |
| NM_015374    | SUN2  | 2188  | 2340  | 8.11095853481 |
| NM_015374    | SUN2  | 2642  | 2793  | 7.37399294064 |
| NM_015374    | SUN2  | 449   | 529   | 6.37399293309 |
| NM_015374    | SUN2  | 323   | 440   | 6.37399294064 |
| NM_015374    | SUN2  | 3876  | 3935  | 5.78903043991 |
| NM_015374    | SUN2  | 1812  | 2018  | 7.59638536198 |
| NM_015374    | SUN2  | 1327  | 1455  | 7.59638536198 |
| NM_015374    | SUN2  | 852   | 1254  | 10.1465824445 |
| NM_015374    | SUN2  | 3240  | 3449  | 7.78903043992 |
| NM_015374    | SUN2  | 1500  | 1683  | 5.78903043992 |
| NM_015374    | SUN2  | 575   | 851   | 8.24846205856 |
| NM_018212    | ENAH  | 4831  | 4896  | 6.58940344626 |
| NM_018212    | ENAH  | 688   | 732   | 6.17419243258 |
| NM_018212    | ENAH  | 4514  | 4570  | 6.1743661829  |
| NM_018212    | ENAH  | 286   | 325   | 5.585386082   |
| NM_018212    | ENAH  | 340   | 382   | 4.58939695112 |
| NM_018212    | ENAH  | 4754  | 4820  | 7.1743661829  |
| NM_018212    | ENAH  | 4686  | 4725  | 6.58940368217 |
| NM_018212    | ENAH  | 4434  | 4485  | 4.58922993186 |
| NM_018212    | ENAH  | 3615  | 3667  | 6.58940367463 |
| NM_018212    | ENAH  | 11250 | 11295 | 5.58939695112 |
| NM_018212    | ENAH  | 405   | 509   | 7.58940368217 |
| NM_018212    | ENAH  | 1874  | 1993  | 6.58940368217 |
| NM_018212    | ENAH  | 2035  | 2073  | 4.58939695112 |

|              |          |      |      |                    |
|--------------|----------|------|------|--------------------|
| NM_018212    | ENAH     | 4101 | 4157 | 4.585386082        |
| NM_018212    | ENAH     | 2787 | 2881 | 6.91133177706      |
| NM_018212    | ENAH     | 4937 | 5031 | 6.1743661829       |
| NM_018212    | ENAH     | 782  | 839  | 5.58940368195      |
| NM_018212    | ENAH     | 1196 | 1318 | 7.91133177706      |
| NM_018212    | ENAH     | 2241 | 2378 | 8.04883530081      |
| NM_018212    | ENAH     | 2891 | 3013 | 6.1743661829       |
| NM_018212    | ENAH     | 583  | 681  | 5.58940368217      |
| NM_018212    | ENAH     | 2100 | 2218 | 7.1743661829       |
| NM_018212    | ENAH     | 3734 | 3882 | 7.1743661829       |
| NM_018212    | ENAH     | 3976 | 4092 | 7.39675860423      |
| NM_018212    | ENAH     | 2528 | 2641 | 6.58940368217      |
| NM_018212    | ENAH     | 3314 | 3476 | 7.91133177706      |
| NM_018212    | ENAH     | 971  | 1109 | 5.58940368217      |
| NM_018212    | ENAH     | 1561 | 1874 | 7.91133177706      |
| NM_018212    | ENAH     | 4207 | 4382 | 7.91133177706      |
| NM_018212    | ENAH     | 2669 | 2786 | 7.39675860423      |
| NM_015379    | BRI3     | 667  | 714  | 6.33709451069      |
| NM_015379    | BRI3     | 294  | 425  | 9.79652636525      |
| NM_015379    | BRI3     | 426  | 643  | 10.7294121694      |
| NM_018218    | USP40    | 1675 | 1715 | 5.02846125661      |
| NM_152608    | C1orf55  | 1914 | 1962 | 5.36525761958      |
| NM_152608    | C1orf55  | 1453 | 1505 | 6.44939009791      |
| NM_152608    | C1orf55  | 2078 | 2120 | 6.44922307864      |
| NM_002205    | ITGA5    | 3201 | 3261 | 13.1363176621      |
| NM_002205    | ITGA5    | 600  | 642  | 12.0521784603      |
| NM_002205    | ITGA5    | 2347 | 2380 | 12.1361439193      |
| NM_002205    | ITGA5    | 240  | 302  | 12.1363176696      |
| NM_002205    | ITGA5    | 2814 | 2890 | 13.72110642        |
| NM_002205    | ITGA5    | 2159 | 2275 | 13.7212801704      |
| NM_001134875 | C14orf80 |      | 1273 | 1369 9.29324047511 |
| NM_001134875 | C14orf80 |      | 1616 | 1669 8.29324047511 |
| NM_002203    | ITGA2    | 3208 | 3256 | 8.61915354595      |
| NM_002203    | ITGA2    | 2290 | 2335 | 7.61915354595      |
| NM_002203    | ITGA2    | 3760 | 3820 | 7.61915354595      |
| NM_002203    | ITGA2    | 5808 | 5852 | 6.034191045        |
| NM_002203    | ITGA2    | 6853 | 6893 | 5.95005183584      |
| NM_002203    | ITGA2    | 2788 | 2868 | 8.35611914011      |
| NM_002203    | ITGA2    | 2144 | 2193 | 8.35611914011      |
| NM_002203    | ITGA2    | 70   | 126  | 7.61915354573      |
| NM_002203    | ITGA2    | 1575 | 1651 | 9.35611914011      |
| NM_002203    | ITGA2    | 1653 | 1676 | 7.03418431417      |
| NM_002203    | ITGA2    | 5277 | 5306 | 6.03017344505      |
| NM_002203    | ITGA2    | 5190 | 5252 | 7.6191535384       |
| NM_002203    | ITGA2    | 307  | 422  | 9.20411604667      |
| NM_002203    | ITGA2    | 3647 | 3707 | 8.03419104523      |
| NM_002203    | ITGA2    | 794  | 911  | 7.03419104523      |
| NM_002203    | ITGA2    | 2668 | 2783 | 9.03419104523      |
| NM_002203    | ITGA2    | 4872 | 4961 | 7.03419104523      |
| NM_002203    | ITGA2    | 3260 | 3613 | 11.3917430498      |

|              |        |      |      |               |
|--------------|--------|------|------|---------------|
| NM_002203    | ITGA2  | 2364 | 2590 | 10.5577530013 |
| NM_002203    | ITGA2  | 6946 | 7018 | 6.03419104523 |
| NM_002203    | ITGA2  | 1740 | 1944 | 9.94108164084 |
| NM_002203    | ITGA2  | 3089 | 3191 | 7.61915354595 |
| NM_002203    | ITGA2  | 943  | 1090 | 8.61915354595 |
| NM_002203    | ITGA2  | 2918 | 3055 | 9.73463076337 |
| NM_002203    | ITGA2  | 554  | 756  | 10.6191535459 |
| NM_002203    | ITGA2  | 6425 | 6479 | 6.03419103768 |
| NM_002203    | ITGA2  | 1311 | 1531 | 10.2821185587 |
| NM_002203    | ITGA2  | 4532 | 4700 | 7.03419104523 |
| NM_002203    | ITGA2  | 1156 | 1310 | 10.2041160467 |
| NM_002203    | ITGA2  | 463  | 551  | 8.03419104523 |
| NM_002203    | ITGA2  | 4736 | 4852 | 8.35611914011 |
| NM_002203    | ITGA2  | 5652 | 5755 | 7.61915354573 |
| NM_002203    | ITGA2  | 1987 | 2105 | 9.61915354595 |
| NM_002203    | ITGA2  | 230  | 303  | 8.84154596728 |
| NM_001166114 | PNPLA6 | 1272 | 1317 | 7.4936172609  |
| NM_001166114 | PNPLA6 | 446  | 508  | 9.07858649268 |
| NM_001166114 | PNPLA6 | 3277 | 3344 | 9.49362399196 |
| NM_001166114 | PNPLA6 | 742  | 788  | 9.49362399196 |
| NM_001166114 | PNPLA6 | 3511 | 3580 | 9.07858649268 |
| NM_001166114 | PNPLA6 | 3395 | 3475 | 7.49362398441 |
| NM_001166114 | PNPLA6 | 339  | 404  | 7.49362399195 |
| NM_001166114 | PNPLA6 | 989  | 1100 | 10.6635489934 |
| NM_001166114 | PNPLA6 | 2708 | 2762 | 8.49362399196 |
| NM_001166114 | PNPLA6 | 1962 | 2039 | 9.81555208684 |
| NM_001166114 | PNPLA6 | 1480 | 1551 | 9.07858649268 |
| NM_001166114 | PNPLA6 | 2598 | 2657 | 8.49362399196 |
| NM_001166114 | PNPLA6 | 4273 | 4366 | 9.81555208684 |
| NM_001166114 | PNPLA6 | 3591 | 3647 | 8.49362399195 |
| NM_001166114 | PNPLA6 | 3104 | 3141 | 7.4936172609  |
| NM_001166114 | PNPLA6 | 788  | 847  | 8.49362399195 |
| NM_001166114 | PNPLA6 | 3895 | 4082 | 11.0785864927 |
| NM_001166114 | PNPLA6 | 534  | 704  | 11.5810868332 |
| NM_001166114 | PNPLA6 | 3668 | 3892 | 11.300978914  |
| NM_001166114 | PNPLA6 | 3176 | 3275 | 10.300978914  |
| NM_001166114 | PNPLA6 | 1597 | 1918 | 11.8859414147 |
| NM_001166114 | PNPLA6 | 2186 | 2589 | 11.5810868332 |
| NM_001166114 | PNPLA6 | 2839 | 2986 | 7.49362399196 |
| NM_001166114 | PNPLA6 | 1326 | 1478 | 8.49362399196 |
| NM_017672    | TRPM7  | 1793 | 1864 | 6.98118431637 |
| NM_017672    | TRPM7  | 2460 | 2494 | 6.97716695212 |
| NM_017672    | TRPM7  | 6567 | 6620 | 6.89704534291 |
| NM_017672    | TRPM7  | 3726 | 3771 | 5.98118455229 |
| NM_017672    | TRPM7  | 3967 | 4031 | 5.97716695212 |
| NM_017672    | TRPM7  | 6424 | 6477 | 5.98101080197 |
| NM_017672    | TRPM7  | 3834 | 3923 | 7.56614705301 |
| NM_017672    | TRPM7  | 3440 | 3498 | 7.56597330269 |
| NM_017672    | TRPM7  | 2966 | 3016 | 6.97716695212 |
| NM_017672    | TRPM7  | 4536 | 4623 | 5.98118454474 |

|              |          |      |      |               |               |
|--------------|----------|------|------|---------------|---------------|
| NM_017672    | TRPM7    | 3072 | 3166 | 8.78853947435 |               |
| NM_017672    | TRPM7    | 6765 | 6892 | 8.56614705301 |               |
| NM_017672    | TRPM7    | 3245 | 3319 | 5.98118431637 |               |
| NM_017672    | TRPM7    | 2842 | 2920 | 6.98118455229 |               |
| NM_017672    | TRPM7    | 2233 | 2380 | 7.56614705301 |               |
| NM_024419    | PGS1     | 2156 | 2219 | 7.34705587486 |               |
| NM_001039481 | ETNK1    | 237  | 292  | 5.98225185257 |               |
| NM_001039481 | ETNK1    | 453  | 670  | 9.57123195346 |               |
| NM_024417    | FDXR     | 605  | 666  | 6.67259743839 |               |
| NM_152352    | C18orf19 |      | 869  | 930           | 7.943669147   |
| NM_152352    | C18orf19 |      | 272  | 345           | 6.943669147   |
| NM_152352    | C18orf19 |      | 2474 | 2511          | 6.943669147   |
| NM_198147    | ABHD15   | 1145 | 1217 | 9.38805800585 |               |
| NM_198147    | ABHD15   | 2268 | 2336 | 9.38805127481 |               |
| NM_032569    | GLYR1    | 1100 | 1157 | 5.81829867263 |               |
| NM_032569    | GLYR1    | 1320 | 1386 | 6.81829890833 |               |
| NM_032569    | GLYR1    | 19   | 74   | 6.40326117335 |               |
| NM_032569    | GLYR1    | 1416 | 1507 | 6.81812515823 |               |
| NM_032569    | GLYR1    | 1629 | 1670 | 4.81428130838 |               |
| NM_032569    | GLYR1    | 3248 | 3339 | 8.14022700344 |               |
| NM_032569    | GLYR1    | 2044 | 2113 | 5.81428130838 |               |
| NM_032569    | GLYR1    | 108  | 241  | 7.81829890855 |               |
| NM_032569    | GLYR1    | 1226 | 1293 | 4.81829890855 |               |
| NM_032569    | GLYR1    | 1776 | 1847 | 5.81829890855 |               |
| NM_032569    | GLYR1    | 2862 | 2938 | 6.81428130838 |               |
| NM_032569    | GLYR1    | 823  | 958  | 6.40326140927 |               |
| NM_032569    | GLYR1    | 3397 | 3464 | 5.81428130838 |               |
| NM_032569    | GLYR1    | 1690 | 1776 | 4.818298901   |               |
| NM_032569    | GLYR1    | 3567 | 3671 | 7.81829890855 |               |
| NM_001005855 | ATP8B2   | 349  | 385  | 7.21814808332 |               |
| NM_032565    | EBPL     | 348  | 410  | 8.28926369225 |               |
| NM_032565    | EBPL     | 414  | 518  | 7.80383686508 |               |
| NM_032565    | EBPL     | 542  | 672  | 8.94134038883 |               |
| NM_032564    | DGAT2    | 1440 | 1519 | 8.33375788349 |               |
| NM_032564    | DGAT2    | 499  | 612  | 9.0707234852  |               |
| NM_032564    | DGAT2    | 964  | 1007 | 6.66465618093 |               |
| NM_032564    | DGAT2    | 71   | 165  | 6.74879538277 |               |
| NM_031452    | FAM103A1 |      | 569  | 626           | 3.87589560513 |
| NM_031452    | FAM103A1 |      | 627  | 671           | 5.87588911    |
| NM_031452    | FAM103A1 |      | 735  | 820           | 5.87589584105 |
| NM_032562    | PLA2G12B |      | 468  | 530           | 9.1547859229  |
| NM_032562    | PLA2G12B |      | 84   | 167           | 9.23892513228 |
| NM_003683    | RRP1     | 743  | 813  | 6.33170124491 |               |
| NM_003683    | RRP1     | 190  | 330  | 7.91666374563 |               |
| NM_003683    | RRP1     | 382  | 545  | 6.33170124491 |               |
| NM_001130028 | CLK3     | 1679 | 1742 | 7.39697990989 |               |
| NM_001130028 | CLK3     | 1557 | 1634 | 7.39714692916 |               |
| NM_033161    | SURF4    | 1117 | 1224 | 7.42074801777 |               |
| NM_033161    | SURF4    | 1855 | 1949 | 5.19835559643 |               |
| NM_033161    | SURF4    | 2099 | 2185 | 7.52028369132 |               |

|              |          |      |      |               |               |
|--------------|----------|------|------|---------------|---------------|
| NM_033161    | SURF4    | 2593 | 2649 | 5.19835558888 |               |
| NM_033161    | SURF4    | 2816 | 2863 | 5.19818184612 |               |
| NM_033161    | SURF4    | 2185 | 2286 | 5.61339309571 |               |
| NM_033161    | SURF4    | 2674 | 2771 | 6.19835559643 |               |
| NM_033161    | SURF4    | 2455 | 2585 | 7.07282471435 |               |
| NM_033161    | SURF4    | 122  | 1117 | 10.7323341684 |               |
| NM_033161    | SURF4    | 1271 | 1388 | 6.61339309571 |               |
| NM_033161    | SURF4    | 1977 | 2093 | 6.42074801777 |               |
| NM_033161    | SURF4    | 1664 | 1801 | 5.19835559643 |               |
| NM_033161    | SURF4    | 1501 | 1661 | 5.19835559643 |               |
| NM_033161    | SURF4    | 2865 | 2997 | 6.42074801777 |               |
| NM_001184796 | ESYT1    | 1104 | 1188 | 9.73991587289 |               |
| NM_001184796 | ESYT1    | 1617 | 1705 | 9.28048425425 |               |
| NM_001184796 | ESYT1    | 3590 | 3640 | 7.86544675496 |               |
| NM_001184796 | ESYT1    | 141  | 203  | 7.28048425425 |               |
| NM_001184796 | ESYT1    | 3651 | 3789 | 9.86544675497 |               |
| NM_001184796 | ESYT1    | 3392 | 3518 | 9.86544675497 |               |
| NM_001184796 | ESYT1    | 2594 | 2691 | 8.28048425425 |               |
| NM_001184796 | ESYT1    | 705  | 1098 | 11.7399158729 |               |
| NM_001184796 | ESYT1    | 3951 | 3990 | 6.19634504487 |               |
| NM_001184796 | ESYT1    | 76   | 124  | 6.19634504487 |               |
| NM_001184796 | ESYT1    | 3048 | 3383 | 10.865446755  |               |
| NM_001184796 | ESYT1    | 1746 | 2166 | 11.8040462103 |               |
| NM_001184796 | ESYT1    | 3864 | 3951 | 8.28048425425 |               |
| NM_001184796 | ESYT1    | 2869 | 2991 | 7.86544675497 |               |
| NM_001184796 | ESYT1    | 1198 | 1612 | 11.8350731059 |               |
| NM_001184796 | ESYT1    | 4002 | 4263 | 10.672801677  |               |
| NM_001184796 | ESYT1    | 2692 | 2869 | 9.08783917631 |               |
| NM_001184796 | ESYT1    | 229  | 703  | 11.4097672712 |               |
| NM_001184796 | ESYT1    | 2177 | 2580 | 11.8350731059 |               |
| NM_004040    | RHOB     | 1264 | 1310 | 2.87070312064 |               |
| NM_004040    | RHOB     | 422  | 490  | 3.87454697049 |               |
| NM_004040    | RHOB     | 1881 | 1955 | 3.87472072059 |               |
| NM_004040    | RHOB     | 629  | 677  | 2.87454697049 |               |
| NM_004040    | RHOB     | 541  | 578  | 2.87070312064 |               |
| NM_014680    | KIAA0100 |      | 4432 | 4521          | 8.23236095148 |
| NM_014680    | KIAA0100 |      | 5495 | 5538          | 4.82629364721 |
| NM_014680    | KIAA0100 |      | 347  | 428           | 4.9104328566  |
| NM_014680    | KIAA0100 |      | 5923 | 5995          | 7.23236095148 |
| NM_014680    | KIAA0100 |      | 1581 | 1644          | 5.91043285659 |
| NM_014680    | KIAA0100 |      | 6551 | 6589          | 6.91043284905 |
| NM_014680    | KIAA0100 |      | 87   | 153           | 8.08035785804 |
| NM_014680    | KIAA0100 |      | 3578 | 3634          | 4.9104328566  |
| NM_014680    | KIAA0100 |      | 5213 | 5244          | 5.82629364721 |
| NM_014680    | KIAA0100 |      | 3042 | 3110          | 7.23236095126 |
| NM_014680    | KIAA0100 |      | 6173 | 6235          | 6.91043284905 |
| NM_014680    | KIAA0100 |      | 4955 | 4995          | 5.91043284905 |
| NM_014680    | KIAA0100 |      | 6487 | 6535          | 4.91043262068 |
| NM_014680    | KIAA0100 |      | 2772 | 2840          | 5.9104328566  |
| NM_014680    | KIAA0100 |      | 296  | 344           | 4.9104328566  |

|           |              |      |      |               |
|-----------|--------------|------|------|---------------|
| NM_014680 | KIAA0100     | 7151 | 7208 | 6.49137775714 |
| NM_014680 | KIAA0100     | 5617 | 5669 | 5.82629364721 |
| NM_014680 | KIAA0100     | 245  | 292  | 5.91042612554 |
| NM_014680 | KIAA0100     | 4522 | 4597 | 5.9104328566  |
| NM_014680 | KIAA0100     | 4706 | 4759 | 5.91043285659 |
| NM_014680 | KIAA0100     | 452  | 637  | 8.71778777865 |
| NM_014680 | KIAA0100     | 5405 | 5467 | 7.23236095148 |
| NM_014680 | KIAA0100     | 1760 | 1868 | 7.9104328566  |
| NM_014680 | KIAA0100     | 3650 | 3745 | 7.71778777865 |
| NM_014680 | KIAA0100     | 4066 | 4124 | 4.82629364721 |
| NM_014680 | KIAA0100     | 652  | 701  | 5.91043262068 |
| NM_014680 | KIAA0100     | 5751 | 5834 | 5.91043285659 |
| NM_014680 | KIAA0100     | 2995 | 3037 | 6.49539535709 |
| NM_014680 | KIAA0100     | 3490 | 3577 | 6.49539535732 |
| NM_014680 | KIAA0100     | 3130 | 3279 | 8.08035785804 |
| NM_014680 | KIAA0100     | 6116 | 6172 | 4.90641525642 |
| NM_014680 | KIAA0100     | 724  | 802  | 6.9104328566  |
| NM_014680 | KIAA0100     | 6749 | 6859 | 6.49539535732 |
| NM_014680 | KIAA0100     | 1668 | 1749 | 6.49539535732 |
| NM_014680 | KIAA0100     | 5999 | 6072 | 5.91043285659 |
| NM_014680 | KIAA0100     | 6897 | 6991 | 4.9104328566  |
| NM_014680 | KIAA0100     | 2349 | 2437 | 5.9104328566  |
| NM_014680 | KIAA0100     | 4830 | 4878 | 5.91043262068 |
| NM_014680 | KIAA0100     | 1171 | 1310 | 7.49539535732 |
| NM_014680 | KIAA0100     | 2083 | 2300 | 7.23236095148 |
| NM_014680 | KIAA0100     | 1868 | 1974 | 7.23236095148 |
| NM_014680 | KIAA0100     | 2681 | 2772 | 6.49539535709 |
| NM_014680 | KIAA0100     | 2478 | 2678 | 8.36986447523 |
| NM_014680 | KIAA0100     | 5249 | 5384 | 4.9104328566  |
| NM_014680 | KIAA0100     | 4270 | 4372 | 5.9104328566  |
| NM_014680 | KIAA0100     | 3828 | 4017 | 7.71778777865 |
| NM_014680 | KIAA0100     | 940  | 1130 | 6.49539535732 |
| NM_014680 | KIAA0100     | 5046 | 5121 | 6.495221607   |
| NM_014686 | KIAA0355     | 5936 | 6008 | 8.10599538492 |
| NM_014686 | KIAA0355     | 635  | 696  | 6.5210328842  |
| NM_014687 | KIAA0226     | 4336 | 4420 | 11.5524726071 |
| NM_014687 | KIAA0226     | 5533 | 5597 | 10.9675033753 |
| NM_014687 | KIAA0226     | 4231 | 4307 | 12.2894382013 |
| NM_014687 | KIAA0226     | 2050 | 2110 | 10.883370897  |
| NM_014688 | USP6NL 456   | 606  |      | 7.68905079718 |
| NM_014688 | USP6NL 3811  | 3858 |      | 6.10007070383 |
| NM_014688 | USP6NL 3115  | 3189 |      | 6.10408157295 |
| NM_014688 | USP6NL 2892  | 2974 |      | 6.10391455369 |
| NM_080652 | TMEM41A 566  | 669  |      | 9.52414395974 |
| NM_080652 | TMEM41A 374  | 442  |      | 9.84607205463 |
| NM_080652 | TMEM41A 818  | 846  |      | 8.44000475036 |
| NM_080652 | TMEM41A 1742 | 1795 |      | 7.52397020942 |
| NM_080652 | TMEM41A 1661 | 1738 |      | 8.52414395973 |
| NM_080652 | TMEM41A 2274 | 2342 |      | 8.52397020942 |
| NM_080652 | TMEM41A 671  | 790  |      | 9.10910646046 |

|              |         |      |      |               |
|--------------|---------|------|------|---------------|
| NM_001143681 | GSTK1   | 84   | 204  | 7.18661107936 |
| NM_001143681 | GSTK1   | 537  | 786  | 7.3386141728  |
| NM_001143681 | GSTK1   | 214  | 372  | 6.3386141728  |
| NM_004140    | LLGL1   | 2258 | 2322 | 7.78353681507 |
| NM_004140    | LLGL1   | 101  | 174  | 8.78755441525 |
| NM_004140    | LLGL1   | 181  | 272  | 8.78755417933 |
| NM_003173    | SUV39H1 | 1114 | 1175 | 11.2004551258 |
| NM_003173    | SUV39H1 | 147  | 225  | 11.2042989757 |
| NM_001099409 | EHBP1L1 | 789  | 850  | 6.43552899156 |
| NM_001099409 | EHBP1L1 | 1307 | 1388 | 6.43151139161 |
| NM_001099409 | EHBP1L1 | 3498 | 3640 | 8.0204914925  |
| NM_033386    | MICALL1 | 2852 | 2931 | 8.2362054834  |
| NM_033386    | MICALL1 | 671  | 757  | 8.2362054834  |
| NM_033386    | MICALL1 | 618  | 666  | 7.15608387419 |
| NM_033386    | MICALL1 | 2618 | 2665 | 8.15608387419 |
| NM_033386    | MICALL1 | 3084 | 3128 | 8.82517885324 |
| NM_033386    | MICALL1 | 2427 | 2458 | 8.2362054834  |
| NM_033386    | MICALL1 | 2523 | 2573 | 8.24021635252 |
| NM_033386    | MICALL1 | 3661 | 3718 | 7.24022308356 |
| NM_033386    | MICALL1 | 3722 | 3835 | 9.56215117846 |
| NM_033386    | MICALL1 | 3300 | 3473 | 9.82518558429 |
| NM_033386    | MICALL1 | 1843 | 1935 | 8.24021635252 |
| NM_033386    | MICALL1 | 2667 | 2773 | 8.24022308357 |
| NM_033386    | MICALL1 | 410  | 566  | 9.24022308357 |
| NM_153265    | EML3    | 3051 | 3122 | 8.30416129574 |
| NM_153265    | EML3    | 2203 | 2249 | 8.30416129574 |
| NM_153265    | EML3    | 1450 | 1517 | 9.30416801924 |
| NM_153265    | EML3    | 1696 | 1733 | 8.30015042662 |
| NM_153265    | EML3    | 1317 | 1390 | 10.3041680268 |
| NM_153265    | EML3    | 2624 | 2698 | 9.30416802657 |
| NM_153265    | EML3    | 2495 | 2614 | 10.6260961217 |
| NM_033389    | SSH2    | 422  | 475  | 9.11639244119 |
| NM_033389    | SSH2    | 5617 | 5659 | 10.6173894828 |
| NM_033389    | SSH2    | 6089 | 6144 | 10.0324269821 |
| NM_033389    | SSH2    | 6269 | 6324 | 10.1163924412 |
| NM_033389    | SSH2    | 3879 | 3936 | 9.03242698212 |
| NM_004229    | MED14   | 2089 | 2161 | 8.34341457389 |
| NM_004229    | MED14   | 696  | 772  | 7.3432408238  |
| NM_004229    | MED14   | 334  | 381  | 7.34340784306 |
| NM_004229    | MED14   | 3766 | 3855 | 7.34341457411 |
| NM_004229    | MED14   | 890  | 943  | 7.92837034378 |
| NM_004229    | MED14   | 2187 | 2265 | 7.34341457411 |
| NM_004229    | MED14   | 1529 | 1585 | 7.92837707461 |
| NM_004229    | MED14   | 787  | 864  | 7.92837034378 |
| NM_004229    | MED14   | 3664 | 3708 | 6.33939697394 |
| NM_004229    | MED14   | 1826 | 1871 | 6.3432408238  |
| NM_004229    | MED14   | 392  | 445  | 7.3432408238  |
| NM_004229    | MED14   | 579  | 664  | 8.66534266878 |
| NM_004229    | MED14   | 1450 | 1529 | 7.92837707483 |
| NM_004229    | MED14   | 2340 | 2462 | 8.34341457411 |



|              |         |      |      |                 |
|--------------|---------|------|------|-----------------|
| NM_004229    | MED14   | 1253 | 1345 | 7.92837707461   |
| NM_001099406 | SLC39A6 | 754  | 808  | 8.2760823735    |
| NM_001099406 | SLC39A6 | 1357 | 1450 | 9.59801046838   |
| NM_001099406 | SLC39A6 | 1249 | 1322 | 7.86104487421   |
| NM_001099406 | SLC39A6 | 1130 | 1165 | 6.2760823735    |
| NM_001099406 | SLC39A6 | 926  | 998  | 8.59801046838   |
| NM_001099406 | SLC39A6 | 198  | 236  | 7.19194316411   |
| NM_001099406 | SLC39A6 | 1495 | 1607 | 9.73551399213   |
| NM_001099406 | SLC39A6 | 490  | 595  | 8.86104487422   |
| NM_001099406 | SLC39A6 | 352  | 443  | 8.59801046838   |
| NM_001099406 | SLC39A6 | 829  | 923  | 8.2760823735    |
| NM_000967    | RPL3    | 458  | 541  | 0.0267281306537 |
| NM_000967    | RPL3    | 621  | 760  | 1.76369372482   |
| NM_000967    | RPL3    | 548  | 596  | 0.76369372482   |
| NM_000967    | RPL3    | 1218 | 1308 | -0.558234370067 |
| NM_000967    | RPL3    | 59   | 123  | 0.0267281231044 |
| NM_000967    | RPL3    | 816  | 1024 | 2.96532758599   |
| NM_000967    | RPL3    | 1036 | 1197 | 1.90119724857   |
| NM_000967    | RPL3    | 206  | 446  | 2.96532758599   |
| NM_007240    | DUSP12  | 512  | 555  | 7.86256491155   |
| NM_007240    | DUSP12  | 813  | 874  | 6.19346343736   |
| NM_007240    | DUSP12  | 594  | 681  | 8.27760264652   |
| NM_000745    | CHRNA5  | 722  | 767  | 10.0985511527   |
| NM_000745    | CHRNA5  | 1824 | 1878 | 9.51341513762   |
| NM_000745    | CHRNA5  | 610  | 653  | 9.50957128777   |
| NM_000745    | CHRNA5  | 1739 | 1802 | 9.42944967856   |
| NM_000745    | CHRNA5  | 357  | 410  | 8.50957128777   |
| NM_000745    | CHRNA5  | 1286 | 1346 | 8.51341513762   |
| NM_000745    | CHRNA5  | 299  | 346  | 9.50957128777   |
| NM_000745    | CHRNA5  | 979  | 1109 | 11.32094381     |
| NM_000745    | CHRNA5  | 769  | 893  | 10.8355169828   |
| NM_000745    | CHRNA5  | 1375 | 1511 | 9.51358888794   |
| NM_000745    | CHRNA5  | 422  | 596  | 11.5135888879   |
| NM_014976    | PDCD11  | 1721 | 1830 | 7.51675344622   |
| NM_014976    | PDCD11  | 1072 | 1194 | 7.51675344622   |
| NM_014976    | PDCD11  | 1840 | 1939 | 8.25371904039   |
| NM_014976    | PDCD11  | 3472 | 3550 | 6.93179093795   |
| NM_014976    | PDCD11  | 2146 | 2206 | 7.5167532103    |
| NM_014976    | PDCD11  | 5026 | 5087 | 8.25371880447   |
| NM_014976    | PDCD11  | 6312 | 6351 | 6.93161719518   |
| NM_014976    | PDCD11  | 4898 | 4941 | 7.43261423684   |
| NM_014976    | PDCD11  | 4691 | 4731 | 5.84765173611   |
| NM_014976    | PDCD11  | 2925 | 3010 | 5.9317909455    |
| NM_014976    | PDCD11  | 2720 | 2772 | 5.92777334533   |
| NM_014976    | PDCD11  | 2340 | 2372 | 5.92777334533   |
| NM_014976    | PDCD11  | 4118 | 4183 | 5.93161719518   |
| NM_014976    | PDCD11  | 2773 | 2895 | 6.9317909455    |
| NM_014976    | PDCD11  | 1213 | 1332 | 8.51675344622   |
| NM_014976    | PDCD11  | 5258 | 5313 | 6.84765173611   |
| NM_014976    | PDCD11  | 5457 | 5549 | 7.51675344622   |

|              |          |      |      |               |               |
|--------------|----------|------|------|---------------|---------------|
| NM_014976    | PDCD11   | 2225 | 2330 | 7.9317909455  |               |
| NM_014976    | PDCD11   | 5591 | 5692 | 5.93179093795 |               |
| NM_014976    | PDCD11   | 3020 | 3213 | 8.25371904039 |               |
| NM_014976    | PDCD11   | 1333 | 1470 | 7.51675344622 |               |
| NM_014976    | PDCD11   | 3228 | 3342 | 8.25371904039 |               |
| NM_014976    | PDCD11   | 2564 | 2688 | 8.73914586756 |               |
| NM_014976    | PDCD11   | 3344 | 3451 | 6.9317909455  |               |
| NM_014976    | PDCD11   | 475  | 603  | 6.9317909455  |               |
| NM_014976    | PDCD11   | 746  | 824  | 5.9317909455  |               |
| NM_014976    | PDCD11   | 5903 | 5968 | 5.92777334533 |               |
| NM_014976    | PDCD11   | 3907 | 4067 | 8.25371904039 |               |
| NM_014976    | PDCD11   | 889  | 1049 | 7.51675344622 |               |
| NM_014976    | PDCD11   | 1945 | 2010 | 6.93179093795 |               |
| NM_005001    | NDUFA7   | 437  | 487  | 5.11335061342 |               |
| NM_005001    | NDUFA7   | 198  | 265  | 4.10933302079 |               |
| NM_005001    | NDUFA7   | 47   | 103  | 5.69831312168 |               |
| NM_005001    | NDUFA7   | 356  | 437  | 5.69831311414 |               |
| NM_005002    | NDUFA9   | 1207 | 1298 | 8.32370213457 |               |
| NM_005002    | NDUFA9   | 1157 | 1202 | 7.73472203368 |               |
| NM_005002    | NDUFA9   | 977  | 1146 | 9.54609455591 |               |
| NM_005002    | NDUFA9   | 326  | 662  | 10.6929359442 |               |
| NM_005002    | NDUFA9   | 680  | 975  | 10.9866671473 |               |
| NM_005002    | NDUFA9   | 54   | 261  | 9.54609455591 |               |
| NM_005003    | NDUFAB1  | 10   | 51   | 1.63837596116 |               |
| NM_005003    | NDUFAB1  | 231  | 659  | 5.28223888199 |               |
| NM_005003    | NDUFAB1  | 96   | 210  | 1.22334519294 |               |
| NM_001190467 | FLJ22184 |      | 214  | 255           | 12.4116399958 |
| NM_001190467 | FLJ22184 |      | 1662 | 1763          | 14.0807417059 |
| NM_001190467 | FLJ22184 |      | 1988 | 2035          | 12.4956054548 |
| NM_005005    | NDUFB9   | 123  | 584  | 7.21860947635 |               |
| NM_005006    | NDUFS1   | 542  | 587  | 4.10082243724 |               |
| NM_005006    | NDUFS1   | 3003 | 3093 | 2.51568618642 |               |
| NM_005006    | NDUFS1   | 1066 | 1127 | 2.51585993674 |               |
| NM_005006    | NDUFS1   | 2023 | 2100 | 4.51585993674 |               |
| NM_005006    | NDUFS1   | 1132 | 1209 | 4.10081570641 |               |
| NM_005006    | NDUFS1   | 2372 | 2453 | 2.51585993652 |               |
| NM_005006    | NDUFS1   | 1472 | 1556 | 2.51585992919 |               |
| NM_005006    | NDUFS1   | 2889 | 2997 | 4.10082243746 |               |
| NM_005006    | NDUFS1   | 1215 | 1325 | 5.51585993674 |               |
| NM_005006    | NDUFS1   | 587  | 710  | 4.10082243746 |               |
| NM_005006    | NDUFS1   | 396  | 514  | 4.10082243746 |               |
| NM_005006    | NDUFS1   | 930  | 1062 | 4.51585993674 |               |
| NM_005006    | NDUFS1   | 1416 | 1468 | 4.10082242991 |               |
| NM_005006    | NDUFS1   | 1929 | 2010 | 3.51585993674 |               |
| NM_005006    | NDUFS1   | 712  | 792  | 2.51585992919 |               |
| NM_005006    | NDUFS1   | 808  | 889  | 4.10082243746 |               |
| NM_005006    | NDUFS1   | 176  | 270  | 4.51585970082 |               |
| NM_005006    | NDUFS1   | 1610 | 1919 | 6.51585993674 |               |
| NM_005009    | NME4     | 397  | 441  | 7.50423889969 |               |
| NM_005009    | NME4     | 317  | 370  | 7.18231080458 |               |

|              |         |       |       |               |
|--------------|---------|-------|-------|---------------|
| NM_005009    | NME4    | 800   | 839   | 5.09817159542 |
| NM_005009    | NME4    | 608   | 730   | 5.1823108048  |
| NM_005009    | NME4    | 167   | 267   | 6.76727330553 |
| NM_032383    | HPS3    | 1866  | 1923  | 7.6693811355  |
| NM_032383    | HPS3    | 805   | 868   | 6.08040104215 |
| NM_032383    | HPS3    | 3683  | 3730  | 6.08441191127 |
| NM_032383    | HPS3    | 1137  | 1202  | 7.08441191127 |
| NM_032383    | HPS3    | 2599  | 2629  | 6.00027943294 |
| NM_032383    | HPS3    | 1003  | 1072  | 7.66938114283 |
| NM_032383    | HPS3    | 2902  | 2991  | 6.08441840641 |
| NM_032383    | HPS3    | 2117  | 2202  | 6.08441840641 |
| NM_032383    | HPS3    | 387   | 464   | 8.08441191127 |
| NM_032382    | COG8    | 1080  | 1111  | 9.32579573522 |
| NM_032382    | COG8    | 2001  | 2030  | 8.24567412601 |
| NM_032382    | COG8    | 595   | 640   | 8.32981309948 |
| NM_032382    | COG8    | 2064  | 2138  | 9.91477583612 |
| NM_032382    | COG8    | 903   | 988   | 9.91477583612 |
| NM_032382    | COG8    | 1545  | 1631  | 10.3298133354 |
| NM_001013836 | MAD1L1  | 745   | 805   | 6.99981767256 |
| NM_001013836 | MAD1L1  | 323   | 377   | 5.91567869909 |
| NM_213611    | SLC25A3 | 970   | 1109  | 6.50560706891 |
| NM_213611    | SLC25A3 | 302   | 349   | 3.10927204596 |
| NM_213611    | SLC25A3 | 351   | 457   | 4.69825214686 |
| NM_213611    | SLC25A3 | 507   | 968   | 8.26303676564 |
| NM_213611    | SLC25A3 | 1146  | 1603  | 8.17937883659 |
| NM_080476    | PIGU    | 1494  | 1566  | 6.2777196356  |
| NM_080476    | PIGU    | 197   | 250   | 7.59964796641 |
| NM_080476    | PIGU    | 1126  | 1183  | 7.27771987152 |
| NM_080476    | PIGU    | 403   | 694   | 10.3221139909 |
| NM_080476    | PIGU    | 252   | 402   | 9.18461046713 |
| NM_080476    | PIGU    | 1750  | 1831  | 6.27771987152 |
| NM_080476    | PIGU    | 1638  | 1740  | 7.27771987152 |
| NM_080476    | PIGU    | 711   | 1123  | 10.7039846262 |
| NM_080476    | PIGU    | 1192  | 1446  | 10.4871732372 |
| NM_004223    | UBE2L6  | 432   | 501   | 8.24877861946 |
| NM_004223    | UBE2L6  | 303   | 354   | 6.57968364041 |
| NM_015088    | TNRC6B  | 13719 | 13788 | 8.26673096595 |
| NM_015088    | TNRC6B  | 4338  | 4383  | 8.26673096595 |
| NM_177423    | PPFIA1  | 1711  | 1781  | 5.59555095638 |
| NM_177423    | PPFIA1  | 2836  | 2922  | 6.5955511923  |
| NM_177423    | PPFIA1  | 1504  | 1579  | 5.5955511923  |
| NM_177423    | PPFIA1  | 2185  | 2218  | 5.59554446125 |
| NM_177423    | PPFIA1  | 3293  | 3344  | 4.59537744199 |
| NM_177423    | PPFIA1  | 3502  | 3619  | 5.5955511923  |
| NM_177423    | PPFIA1  | 2711  | 2797  | 6.18051369302 |
| NM_177423    | PPFIA1  | 3354  | 3426  | 5.59537744199 |
| NM_177423    | PPFIA1  | 1214  | 1305  | 4.59554446125 |
| NM_177423    | PPFIA1  | 307   | 397   | 6.18051368548 |
| NM_177423    | PPFIA1  | 485   | 556   | 4.59555095638 |
| NM_177423    | PPFIA1  | 1925  | 2052  | 6.5955511923  |

|              |          |      |      |      |               |
|--------------|----------|------|------|------|---------------|
| NM_015085    | RAP1GAP2 |      | 3816 | 3862 | 8.77219570617 |
| NM_015085    | RAP1GAP2 |      | 2834 | 2932 | 8.77236272543 |
| NM_015084    | MRPS27   | 252  | 289  |      | 3.98208412672 |
| NM_015084    | MRPS27   | 316  | 372  |      | 5.64716823665 |
| NM_024345    | DCAF10   | 1444 | 1499 |      | 7.36702754714 |
| NM_001128431 | SLC39A14 |      | 2037 | 2106 | 3.71789182608 |
| NM_001128431 | SLC39A14 |      | 3895 | 4000 | 5.88781682752 |
| NM_001128431 | SLC39A14 |      | 3684 | 3797 | 5.52524674814 |
| NM_001128431 | SLC39A14 |      | 2572 | 2706 | 5.52524674814 |
| NM_001128431 | SLC39A14 |      | 2710 | 2812 | 6.41833154422 |
| NM_001128431 | SLC39A14 |      | 617  | 646  | 2.71771807576 |
| NM_001128431 | SLC39A14 |      | 4168 | 4236 | 4.3028543268  |
| NM_001128431 | SLC39A14 |      | 3131 | 3267 | 6.52524674814 |
| NM_001128431 | SLC39A14 |      | 4533 | 4620 | 5.52524674814 |
| NM_001128431 | SLC39A14 |      | 163  | 267  | 5.52524674814 |
| NM_001128431 | SLC39A14 |      | 51   | 157  | 3.71789182608 |
| NM_001128431 | SLC39A14 |      | 279  | 532  | 7.3028543268  |
| NM_001128431 | SLC39A14 |      | 543  | 615  | 4.71789182608 |
| NM_001128431 | SLC39A14 |      | 1355 | 1998 | 9.52524674814 |
| NM_001128431 | SLC39A14 |      | 646  | 1354 | 9.60053487544 |
| NM_001128431 | SLC39A14 |      | 4288 | 4531 | 6.41833154422 |
| NM_001128431 | SLC39A14 |      | 2824 | 3022 | 7.03981992097 |
| NM_001128431 | SLC39A14 |      | 2107 | 2566 | 8.24145378213 |
| NM_001128431 | SLC39A14 |      | 3281 | 3651 | 7.57587282121 |
| NM_001128431 | SLC39A14 |      | 4024 | 4139 | 6.03981992097 |
| NM_015083    | CDK12    | 5507 | 5561 |      | 5.10482093484 |
| NM_015083    | CDK12    | 2998 | 3065 |      | 7.68979016661 |
| NM_015083    | CDK12    | 4584 | 4647 |      | 6.68978343556 |
| NM_015083    | CDK12    | 5164 | 5239 |      | 6.68577256644 |
| NM_015083    | CDK12    | 4524 | 4566 |      | 5.02068845651 |
| NM_015083    | CDK12    | 1733 | 1775 |      | 6.10482742997 |
| NM_015083    | CDK12    | 1567 | 1635 |      | 6.10081006572 |
| NM_015083    | CDK12    | 3368 | 3462 |      | 6.10482766589 |
| NM_015083    | CDK12    | 1681 | 1732 |      | 6.10482093484 |
| NM_015083    | CDK12    | 778  | 818  |      | 5.10465391557 |
| NM_015083    | CDK12    | 2276 | 2374 |      | 6.68979016661 |
| NM_015083    | CDK12    | 600  | 649  |      | 5.02068845651 |
| NM_015083    | CDK12    | 2376 | 2521 |      | 6.10482766589 |
| NM_015083    | CDK12    | 3249 | 3352 |      | 6.68979016661 |
| NM_015083    | CDK12    | 3682 | 3739 |      | 6.10081006572 |
| NM_015083    | CDK12    | 2704 | 2833 |      | 6.68979016661 |
| NM_015083    | CDK12    | 5035 | 5088 |      | 5.10081006572 |
| NM_015083    | CDK12    | 3124 | 3218 |      | 8.10482766589 |
| NM_015083    | CDK12    | 2176 | 2266 |      | 6.10081006572 |
| NM_015083    | CDK12    | 5765 | 5904 |      | 5.10482766589 |
| NM_015083    | CDK12    | 3477 | 3600 |      | 7.42675576078 |
| NM_001034852 | SMOC1    | 1695 | 1756 |      | 4.4400142841  |
| NM_001034852 | SMOC1    | 2887 | 2921 |      | 3.4400142841  |
| NM_001034852 | SMOC1    | 2046 | 2113 |      | 5.44002077924 |
| NM_001034852 | SMOC1    | 1247 | 1326 |      | 6.24737593721 |

|              |        |      |      |               |
|--------------|--------|------|------|---------------|
| NM_001034852 | SMOC1  | 107  | 158  | 6.02498351588 |
| NM_001034852 | SMOC1  | 1360 | 1422 | 5.02498351565 |
| NM_001034852 | SMOC1  | 1983 | 2045 | 4.43600341498 |
| NM_001034852 | SMOC1  | 1117 | 1242 | 4.44002101515 |
| NM_001034852 | SMOC1  | 3441 | 3502 | 3.4400142841  |
| NM_001034852 | SMOC1  | 3360 | 3422 | 3.4400142841  |
| NM_001034852 | SMOC1  | 2391 | 2504 | 4.43600341498 |
| NM_001034852 | SMOC1  | 531  | 667  | 6.24737593721 |
| NM_001034852 | SMOC1  | 382  | 526  | 6.6099460166  |
| NM_001034852 | SMOC1  | 1472 | 1636 | 6.76194911004 |
| NM_001034852 | SMOC1  | 1016 | 1113 | 5.44002101515 |
| NM_001034852 | SMOC1  | 670  | 1015 | 7.96358297121 |
| NM_004996    | ABCC1  | 3316 | 3463 | 8.6400121377  |
| NM_004996    | ABCC1  | 694  | 773  | 9.6400121377  |
| NM_004996    | ABCC1  | 203  | 244  | 6.31406644264 |
| NM_004996    | ABCC1  | 3898 | 3942 | 6.31808380689 |
| NM_004996    | ABCC1  | 1495 | 1580 | 8.31808404281 |
| NM_004996    | ABCC1  | 2311 | 2345 | 6.31791029249 |
| NM_004996    | ABCC1  | 4031 | 4107 | 6.31406644264 |
| NM_004996    | ABCC1  | 394  | 474  | 8.31808404281 |
| NM_004996    | ABCC1  | 3971 | 4014 | 6.23394483343 |
| NM_004996    | ABCC1  | 5146 | 5206 | 8.31807731176 |
| NM_004996    | ABCC1  | 1113 | 1162 | 7.31808380689 |
| NM_004996    | ABCC1  | 6031 | 6117 | 8.31808404281 |
| NM_004996    | ABCC1  | 1583 | 1723 | 6.31808404281 |
| NM_004996    | ABCC1  | 6191 | 6242 | 7.31808403526 |
| NM_004996    | ABCC1  | 1724 | 1803 | 7.90304653598 |
| NM_004996    | ABCC1  | 3551 | 3634 | 7.89902894336 |
| NM_004996    | ABCC1  | 3050 | 3117 | 6.31807731176 |
| NM_004996    | ABCC1  | 4133 | 4225 | 8.31808404281 |
| NM_004996    | ABCC1  | 4312 | 4440 | 8.6400121377  |
| NM_004996    | ABCC1  | 1920 | 2106 | 8.90304654353 |
| NM_004996    | ABCC1  | 3131 | 3251 | 8.31808404281 |
| NM_004996    | ABCC1  | 922  | 1010 | 7.31791029249 |
| NM_004996    | ABCC1  | 1263 | 1402 | 7.31808404281 |
| NM_004996    | ABCC1  | 4614 | 4696 | 6.31791029249 |
| NM_004996    | ABCC1  | 2955 | 3033 | 7.31808404281 |
| NM_001839    | CNN3   | 890  | 955  | 4.13057235207 |
| NM_001839    | CNN3   | 993  | 1070 | 4.13057235206 |
| NM_001839    | CNN3   | 1532 | 1588 | 3.54560961543 |
| NM_001839    | CNN3   | 1703 | 1746 | 2.54159225118 |
| NM_001839    | CNN3   | 466  | 517  | 3.54159225118 |
| NM_001839    | CNN3   | 630  | 749  | 5.71553485279 |
| NM_001839    | CNN3   | 781  | 884  | 4.54560985135 |
| NM_001839    | CNN3   | 351  | 462  | 4.54560985135 |
| NM_001839    | CNN3   | 1092 | 1245 | 5.54560985135 |
| NM_001839    | CNN3   | 1313 | 1384 | 2.54560985134 |
| NM_001835    | CLTCL1 | 910  | 968  | 10.7598550176 |
| NM_001835    | CLTCL1 | 2501 | 2573 | 11.7600287677 |
| NM_001835    | CLTCL1 | 3038 | 3179 | 11.3449912687 |

|           |        |      |      |               |
|-----------|--------|------|------|---------------|
| NM_001834 | CLTB   | 886  | 948  | 4.81129533664 |
| NM_001834 | CLTB   | 1048 | 1091 | 6.39626456087 |
| NM_001834 | CLTB   | 200  | 261  | 6.81129533664 |
| NM_001834 | CLTB   | 540  | 640  | 6.39626456842 |
| NM_001786 | CDK1   | 1390 | 1443 | 9.24776666473 |
| NM_001786 | CDK1   | 1765 | 1810 | 6.92182096967 |
| NM_001786 | CDK1   | 1199 | 1261 | 10.0957635713 |
| NM_001786 | CDK1   | 218  | 280  | 7.92583856985 |
| NM_001786 | CDK1   | 1632 | 1712 | 7.92583833393 |
| NM_001786 | CDK1   | 895  | 1190 | 12.1352919355 |
| NM_001786 | CDK1   | 617  | 881  | 11.3852701885 |
| NM_001786 | CDK1   | 467  | 617  | 10.8327291655 |
| NM_001786 | CDK1   | 285  | 457  | 10.0957635713 |
| NM_001833 | CLTA   | 1079 | 1134 | 2.17044175329 |
| NM_001833 | CLTA   | 414  | 469  | 2.17026800298 |
| NM_001833 | CLTA   | 833  | 920  | 3.17044175329 |
| NM_001833 | CLTA   | 714  | 779  | 1.58547925257 |
| NM_001833 | CLTA   | 923  | 1040 | 4.67294209382 |
| NM_001833 | CLTA   | 290  | 375  | 2.17044175329 |
| NM_001833 | CLTA   | 470  | 657  | 3.90740734746 |
| NM_001833 | CLTA   | 93   | 237  | 3.58547925257 |
| NM_001784 | CD97   | 3094 | 3166 | 11.1066584281 |
| NM_001784 | CD97   | 916  | 986  | 12.1066584281 |
| NM_001784 | CD97   | 326  | 372  | 11.1064846778 |
| NM_001784 | CD97   | 2900 | 3014 | 12.3290508495 |
| NM_001784 | CD97   | 2122 | 2261 | 14.0452578835 |
| NM_001784 | CD97   | 829  | 914  | 11.5216959274 |
| NM_001784 | CD97   | 2521 | 2564 | 9.52169591987 |
| NM_001784 | CD97   | 1675 | 1817 | 12.8436240223 |
| NM_001784 | CD97   | 1832 | 2033 | 13.3290508495 |
| NM_001784 | CD97   | 1007 | 1136 | 12.3290508495 |
| NM_001784 | CD97   | 372  | 499  | 12.8436240223 |
| NM_001784 | CD97   | 1545 | 1662 | 11.5216959274 |
| NM_001784 | CD97   | 1140 | 1539 | 14.1066584281 |
| NM_001784 | CD97   | 2038 | 2110 | 9.5216956915  |
| NM_001784 | CD97   | 2640 | 2761 | 9.52169592741 |
| NM_001784 | CD97   | 511  | 800  | 13.6091587687 |
| NM_001784 | CD97   | 2276 | 2519 | 13.6091587687 |
| NM_004147 | DRG1   | 1230 | 1285 | 4.67838864945 |
| NM_004147 | DRG1   | 1367 | 1435 | 6.26334441934 |
| NM_004147 | DRG1   | 1292 | 1339 | 4.59424944029 |
| NM_004147 | DRG1   | 494  | 642  | 6.48574357173 |
| NM_004147 | DRG1   | 137  | 184  | 3.6743710495  |
| NM_004147 | DRG1   | 300  | 464  | 7.48574357173 |
| NM_004147 | DRG1   | 913  | 1026 | 7.13782026831 |
| NM_004147 | DRG1   | 1120 | 1225 | 7.26335115039 |
| NM_004147 | DRG1   | 671  | 859  | 6.84831365111 |
| NM_001616 | ACVR2A | 1974 | 2025 | 7.3325275198  |
| NM_001616 | ACVR2A | 404  | 445  | 6.33269453906 |
| NM_001616 | ACVR2A | 1554 | 1619 | 7.24856206073 |

|              |         |      |      |               |
|--------------|---------|------|------|---------------|
| NM_182648    | BAZ1A   | 4968 | 5014 | 6.59642384407 |
| NM_182648    | BAZ1A   | 1967 | 2034 | 7.82283385803 |
| NM_182648    | BAZ1A   | 3857 | 3918 | 5.01146134334 |
| NM_182648    | BAZ1A   | 1761 | 1810 | 5.01146134334 |
| NM_182648    | BAZ1A   | 635  | 775  | 6.01547894352 |
| NM_182648    | BAZ1A   | 3471 | 3599 | 7.01547894352 |
| NM_182648    | BAZ1A   | 4782 | 4837 | 5.0153051932  |
| NM_182648    | BAZ1A   | 999  | 1050 | 6.01146134334 |
| NM_182648    | BAZ1A   | 3928 | 4056 | 7.60044144424 |
| NM_182648    | BAZ1A   | 906  | 999  | 6.60044144424 |
| NM_182648    | BAZ1A   | 1204 | 1284 | 5.01146134334 |
| NM_182648    | BAZ1A   | 3011 | 3085 | 5.93133973413 |
| NM_182649    | PCNA    | 1204 | 1275 | 2.98555333616 |
| NM_182649    | PCNA    | 45   | 238  | 6.31762005899 |
| NM_182649    | PCNA    | 1009 | 1156 | 5.39162064044 |
| NM_182649    | PCNA    | 252  | 478  | 5.52912416419 |
| NM_182649    | PCNA    | 521  | 1009 | 7.79761300011 |
| NM_021976    | RXRB    | 1474 | 1548 | 8.51147339185 |
| NM_182640    | MRPS9   | 1116 | 1205 | 3.99204253133 |
| NM_182640    | MRPS9   | 641  | 754  | 4.57700503205 |
| NM_182640    | MRPS9   | 820  | 890  | 2.90790332195 |
| NM_182642    | CTDSP1  | 2348 | 2393 | 8.68170583182 |
| NM_182642    | CTDSP1  | 754  | 827  | 8.68170583182 |
| NM_182642    | CTDSP1  | 1382 | 1439 | 9.68187958214 |
| NM_182642    | CTDSP1  | 599  | 640  | 7.0967433311  |
| NM_182642    | CTDSP1  | 2554 | 2634 | 8.68187958214 |
| NM_182642    | CTDSP1  | 1004 | 1102 | 8.68187958214 |
| NM_182642    | CTDSP1  | 1983 | 2094 | 8.68187958192 |
| NM_182642    | CTDSP1  | 892  | 1000 | 8.68187958214 |
| NM_021977    | SLC22A3 | 512  | 557  | 7.41374334249 |
| NM_021977    | SLC22A3 | 1187 | 1271 | 8.99887959331 |
| NM_021977    | SLC22A3 | 2608 | 2679 | 8.41374334249 |
| NM_021974    | POLR2F  | 111  | 212  | 6.09684020943 |
| NM_021974    | POLR2F  | 321  | 522  | 6.09684020943 |
| NM_001024912 | CEACAM1 | 1126 | 1212 | 6.30721223477 |
| NM_001024912 | CEACAM1 | 1550 | 1595 | 3.41571810333 |
| NM_001024912 | CEACAM1 | 3325 | 3418 | 6.08481981343 |
| NM_001024912 | CEACAM1 | 2012 | 2058 | 5.49583971254 |
| NM_001024912 | CEACAM1 | 617  | 670  | 4.49985731271 |
| NM_001024912 | CEACAM1 | 1410 | 1549 | 7.40674790832 |
| NM_001024912 | CEACAM1 | 192  | 271  | 4.49985731271 |
| NM_001024912 | CEACAM1 | 473  | 548  | 5.49985731271 |
| NM_001024912 | CEACAM1 | 1284 | 1406 | 6.08481981343 |
| NM_001024912 | CEACAM1 | 874  | 1103 | 6.95928893135 |
| NM_001024912 | CEACAM1 | 348  | 473  | 4.49985731271 |
| NM_001024912 | CEACAM1 | 685  | 811  | 5.08481981343 |
| NM_001024912 | CEACAM1 | 2185 | 2254 | 4.49968356239 |
| NM_004661    | CDC23   | 1064 | 1134 | 7.24653281817 |
| NM_004661    | CDC23   | 946  | 1008 | 8.57247851323 |
| NM_004661    | CDC23   | 1009 | 1053 | 7.75137370968 |

|           |       |       |       |               |
|-----------|-------|-------|-------|---------------|
| NM_004661 | CDC23 | 599   | 737   | 9.25055041834 |
| NM_004661 | CDC23 | 1342  | 1381  | 6.24653281817 |
| NM_004660 | DDX3Y | 1095  | 1162  | 4.2909613367  |
| NM_004667 | HERC2 | 4634  | 4701  | 7.14405182018 |
| NM_004667 | HERC2 | 7001  | 7083  | 7.1442255705  |
| NM_004667 | HERC2 | 8250  | 8326  | 8.72918807122 |
| NM_004667 | HERC2 | 11635 | 11682 | 7.14405182018 |
| NM_004667 | HERC2 | 9576  | 9623  | 6.06008636111 |
| NM_004667 | HERC2 | 6070  | 6153  | 7.14421883945 |
| NM_004667 | HERC2 | 14795 | 14874 | 7.14422556295 |
| NM_004667 | HERC2 | 9095  | 9154  | 6.14422533458 |
| NM_004667 | HERC2 | 7781  | 7816  | 7.14421883945 |
| NM_004667 | HERC2 | 6000  | 6069  | 8.14421883945 |
| NM_004667 | HERC2 | 4297  | 4374  | 7.1442255705  |
| NM_004667 | HERC2 | 1870  | 1938  | 6.14405182018 |
| NM_004667 | HERC2 | 3004  | 3045  | 6.06008636111 |
| NM_004667 | HERC2 | 7875  | 7923  | 6.14405182018 |
| NM_004667 | HERC2 | 66    | 146   | 7.72918134017 |
| NM_004667 | HERC2 | 2869  | 2922  | 7.72918134017 |
| NM_004667 | HERC2 | 6944  | 6998  | 7.72918807121 |
| NM_004667 | HERC2 | 3200  | 3284  | 8.1442255705  |
| NM_004667 | HERC2 | 15042 | 15098 | 7.72517047105 |
| NM_004667 | HERC2 | 6830  | 6915  | 6.1442255705  |
| NM_004667 | HERC2 | 3143  | 3198  | 7.72517047105 |
| NM_004667 | HERC2 | 3757  | 3843  | 7.1442255705  |
| NM_004667 | HERC2 | 187   | 288   | 7.1442255705  |
| NM_004667 | HERC2 | 10512 | 10576 | 6.14405182018 |
| NM_004667 | HERC2 | 296   | 423   | 7.1442255705  |
| NM_004667 | HERC2 | 4014  | 4064  | 6.14020797033 |
| NM_004667 | HERC2 | 8026  | 8106  | 6.1442255705  |
| NM_004667 | HERC2 | 8714  | 8780  | 7.14421883945 |
| NM_004667 | HERC2 | 5916  | 5967  | 6.06008636111 |
| NM_004667 | HERC2 | 9807  | 9876  | 7.72517047105 |
| NM_004667 | HERC2 | 10094 | 10184 | 6.06008636111 |
| NM_004667 | HERC2 | 5654  | 5710  | 6.14405182018 |
| NM_004667 | HERC2 | 5014  | 5078  | 6.14405182018 |
| NM_004667 | HERC2 | 7297  | 7374  | 7.7290143209  |
| NM_004667 | HERC2 | 5275  | 5327  | 6.14405182018 |
| NM_004667 | HERC2 | 2341  | 2418  | 6.14405182018 |
| NM_001168 | BIRC5 | 660   | 715   | 8.35898622792 |
| NM_001168 | BIRC5 | 311   | 340   | 4.8154153999  |
| NM_001168 | BIRC5 | 224   | 304   | 4.89955460929 |
| NM_001168 | BIRC5 | 1389  | 1444  | 6.48451711001 |
| NM_001168 | BIRC5 | 857   | 924   | 4.89553700911 |
| NM_001168 | BIRC5 | 947   | 1016  | 7.22148270417 |
| NM_001168 | BIRC5 | 757   | 796   | 6.48434335969 |
| NM_001168 | BIRC5 | 2052  | 2119  | 6.48049950984 |
| NM_001168 | BIRC5 | 1066  | 1113  | 6.48451711    |
| NM_001166 | BIRC2 | 1662  | 1748  | 5.03080516105 |
| NM_001166 | BIRC2 | 2815  | 2881  | 5.0267875611  |



|              |          |      |      |                    |
|--------------|----------|------|------|--------------------|
| NM_001166    | BIRC2    | 1425 | 1463 | 5.0267875611       |
| NM_001166    | BIRC2    | 482  | 535  | 5.03063141095      |
| NM_001166    | BIRC2    | 2352 | 2435 | 5.03080515372      |
| NM_001166    | BIRC2    | 3549 | 3674 | 6.61576766199      |
| NM_001166    | BIRC2    | 187  | 274  | 5.03079843022      |
| NM_025222    | WDR82    | 820  | 898  | 5.25527651154      |
| NM_025222    | WDR82    | 672  | 711  | 3.66629641064      |
| NM_025222    | WDR82    | 2764 | 2802 | 4.58617480143      |
| NM_025222    | WDR82    | 347  | 459  | 4.6703137749       |
| NM_025222    | WDR82    | 1266 | 1379 | 4.67031401081      |
| NM_198318    | PRMT1    | 1317 | 1365 | 5.81552768128      |
| NM_198318    | PRMT1    | 1169 | 1210 | 4.07856208689      |
| NM_198318    | PRMT1    | 124  | 291  | 5.81552768128      |
| NM_198318    | PRMT1    | 996  | 1169 | 5.30095450845      |
| NM_198318    | PRMT1    | 831  | 926  | 2.49359958639      |
| NM_198318    | PRMT1    | 292  | 393  | 5.30095450845      |
| NM_198318    | PRMT1    | 407  | 585  | 6.30095450845      |
| NM_198318    | PRMT1    | 927  | 991  | 3.49359958638      |
| NM_198318    | PRMT1    | 644  | 820  | 6.30095450845      |
| NM_001143827 | MAPRE2   | 1463 | 1521 | 4.96704559531      |
| NM_001143827 | MAPRE2   | 1214 | 1297 | 6.63614706949      |
| NM_001143827 | MAPRE2   | 450  | 539  | 7.37311289935      |
| NM_001199462 | PDCD2    | 694  | 758  | 7.32556849322      |
| NM_001199462 | PDCD2    | 268  | 326  | 7.32556825731      |
| NM_001199462 | PDCD2    | 353  | 401  | 7.00346664802      |
| NM_001199462 | PDCD2    | 950  | 993  | 6.00363366728      |
| NM_001199462 | PDCD2    | 766  | 834  | 4.91950118895      |
| NM_001199462 | PDCD2    | 870  | 946  | 7.325568493        |
| NM_001199462 | PDCD2    | 175  | 266  | 6.00364039812      |
| NM_198310    | TTC8     | 695  | 759  | 9.0310336313       |
| NM_000784    | CYP27A1  | 366  | 417  | 5.06280376117      |
| NM_000784    | CYP27A1  | 2121 | 2204 | 3.47784799151      |
| NM_000784    | CYP27A1  | 580  | 656  | 6.06281049223      |
| NM_000784    | CYP27A1  | 780  | 851  | 3.47784799151      |
| NM_000784    | CYP27A1  | 694  | 772  | 5.47784799151      |
| NM_000784    | CYP27A1  | 853  | 919  | 5.47784798396      |
| NM_000784    | CYP27A1  | 1546 | 1775 | 7.28520291356      |
| NM_000784    | CYP27A1  | 948  | 1332 | 8.43204430189      |
| NM_000784    | CYP27A1  | 1354 | 1539 | 6.64777299295      |
| NM_017787    | C10orf26 |      | 1594 | 1646 6.19531848163 |
| NM_017787    | C10orf26 |      | 2411 | 2451 6.19933584589 |
| NM_017787    | C10orf26 |      | 2968 | 3033 7.78429857498 |
| NM_017787    | C10orf26 |      | 3409 | 3466 6.19531848163 |
| NM_000788    | DCK      | 2478 | 2591 | 6.76520796551      |
| NM_000788    | DCK      | 922  | 973  | 6.1800717147       |
| NM_000788    | DCK      | 225  | 279  | 5.17622786484      |
| NM_000788    | DCK      | 1606 | 1757 | 6.18024546502      |
| NM_000788    | DCK      | 581  | 788  | 9.57256288779      |
| NM_000788    | DCK      | 1404 | 1459 | 7.18024545747      |
| NM_000788    | DCK      | 395  | 576  | 8.98760038707      |

|           |       |      |      |               |
|-----------|-------|------|------|---------------|
| NM_000788 | DCK   | 1259 | 1380 | 7.18024546502 |
| NM_000788 | DCK   | 1020 | 1089 | 6.1800717147  |
| NM_000788 | DCK   | 845  | 909  | 5.17622786484 |
| NM_000788 | DCK   | 2165 | 2246 | 5.18023873396 |
| NM_017838 | NHP2  | 752  | 804  | 6.76599651355 |
| NM_017837 | PIGV  | 515  | 618  | 9.77497705839 |
| NM_017837 | PIGV  | 1716 | 1760 | 8.690837849   |
| NM_017837 | PIGV  | 1194 | 1231 | 8.77497682247 |
| NM_017837 | PIGV  | 1023 | 1114 | 10.3599395591 |
| NM_017837 | PIGV  | 1438 | 1497 | 8.690837849   |
| NM_017837 | PIGV  | 1385 | 1435 | 8.77497032733 |
| NM_017837 | PIGV  | 910  | 948  | 9.77480330807 |
| NM_017837 | PIGV  | 1763 | 1814 | 10.3599395589 |
| NM_017837 | PIGV  | 737  | 797  | 8.77095945821 |
| NM_172070 | UBR3  | 587  | 640  | 7.19619295292 |
| NM_172070 | UBR3  | 6075 | 6123 | 5.20021031718 |
| NM_172070 | UBR3  | 3669 | 3781 | 6.78517305382 |
| NM_172070 | UBR3  | 5985 | 6062 | 5.20003680278 |
| NM_172070 | UBR3  | 2592 | 2641 | 6.78516632276 |
| NM_172070 | UBR3  | 5384 | 5468 | 7.20021031718 |
| NM_172070 | UBR3  | 4928 | 4961 | 6.11607134371 |
| NM_172070 | UBR3  | 4287 | 4393 | 7.52213864798 |
| NM_172070 | UBR3  | 2327 | 2389 | 5.20021031718 |
| NM_172070 | UBR3  | 1798 | 1869 | 5.20021054555 |
| NM_172070 | UBR3  | 1463 | 1534 | 6.20020382204 |
| NM_172070 | UBR3  | 2761 | 2851 | 7.52213864798 |
| NM_172070 | UBR3  | 4018 | 4090 | 6.2002105531  |
| NM_172070 | UBR3  | 1585 | 1707 | 8.00756547515 |
| NM_172070 | UBR3  | 4483 | 4533 | 5.20021031718 |
| NM_172070 | UBR3  | 925  | 1011 | 6.20020382204 |
| NM_172070 | UBR3  | 2912 | 2969 | 6.20021054555 |
| NM_172070 | UBR3  | 2121 | 2235 | 7.2002105531  |
| NM_172070 | UBR3  | 337  | 425  | 5.20020382204 |
| NM_172071 | RC3H1 | 3821 | 3875 | 9.42844948256 |
| NM_172071 | RC3H1 | 8543 | 8599 | 7.83964313199 |
| NM_172071 | RC3H1 | 2018 | 2071 | 8.75952152278 |
| NM_172071 | RC3H1 | 4573 | 4623 | 7.75952152278 |
| NM_172071 | RC3H1 | 8123 | 8177 | 8.75952152278 |
| NM_172071 | RC3H1 | 3727 | 3782 | 9.42861650183 |
| NM_172071 | RC3H1 | 851  | 891  | 8.84348698184 |
| NM_172071 | RC3H1 | 1219 | 1276 | 9.3444840235  |
| NM_172071 | RC3H1 | 9448 | 9515 | 8.84366072461 |
| NM_172071 | RC3H1 | 9174 | 9232 | 7.84366073194 |
| NM_172071 | RC3H1 | 7900 | 7942 | 8.84348698184 |
| NM_172071 | RC3H1 | 41   | 129  | 10.1655888268 |
| NM_172071 | RC3H1 | 1860 | 1904 | 7.75952152278 |
| NM_172071 | RC3H1 | 730  | 779  | 7.83964313199 |
| NM_172071 | RC3H1 | 694  | 730  | 9.3444840235  |
| NM_172071 | RC3H1 | 1123 | 1179 | 9.84365400111 |
| NM_172071 | RC3H1 | 1905 | 1963 | 7.75952152278 |

|           |         |       |       |               |
|-----------|---------|-------|-------|---------------|
| NM_172071 | RC3H1   | 10039 | 10087 | 7.75952152278 |
| NM_172071 | RC3H1   | 6253  | 6286  | 7.75952152278 |
| NM_172071 | RC3H1   | 4274  | 4327  | 7.83964313199 |
| NM_006756 | TCEA1   | 2106  | 2168  | 1.46560248099 |
| NM_006756 | TCEA1   | 1243  | 1281  | 1.38548087178 |
| NM_006756 | TCEA1   | 669   | 710   | 1.38548087178 |
| NM_006756 | TCEA1   | 713   | 793   | 1.46560248099 |
| NM_006756 | TCEA1   | 1007  | 1123  | 1.46962008116 |
| NM_006756 | TCEA1   | 323   | 401   | 1.46560248099 |
| NM_006756 | TCEA1   | 2469  | 2518  | 1.38548087178 |
| NM_016308 | CMPK1   | 1887  | 1935  | 3.4592718131  |
| NM_016308 | CMPK1   | 2164  | 2232  | 3.45927157719 |
| NM_016308 | CMPK1   | 2569  | 2613  | 5.04406056351 |
| NM_016308 | CMPK1   | 579   | 718   | 6.26662673517 |
| NM_016308 | CMPK1   | 1316  | 1390  | 5.04423431383 |
| NM_016308 | CMPK1   | 416   | 502   | 5.04423431382 |
| NM_016308 | CMPK1   | 167   | 411   | 7.04423431383 |
| NM_016308 | CMPK1   | 771   | 834   | 4.45927180556 |
| NM_016306 | DNAJB11 | 1599  | 1664  | 2.89071397579 |
| NM_016306 | DNAJB11 | 38    | 126   | 3.47567647652 |
| NM_016306 | DNAJB11 | 1506  | 1592  | 3.8907139758  |
| NM_016306 | DNAJB11 | 157   | 778   | 8.0404610953  |
| NM_016306 | DNAJB11 | 779   | 1495  | 8.13864148924 |
| NM_016304 | RSL24D1 | 1240  | 1309  | 0.91670654429 |
| NM_016304 | RSL24D1 | 652   | 724   | 3.23862790813 |
| NM_016304 | RSL24D1 | 1144  | 1233  | 1.91670654429 |
| NM_016304 | RSL24D1 | 171   | 210   | 1.91268894412 |
| NM_016301 | GPN3    | 318   | 387   | 6.41225588283 |
| NM_015962 | FCF1    | 316   | 390   | 6.96221864406 |
| NM_015962 | FCF1    | 651   | 698   | 6.37323854317 |
| NM_015962 | FCF1    | 393   | 489   | 6.37725614312 |
| NM_015963 | THAP4   | 419   | 475   | 6.47595377491 |
| NM_015963 | THAP4   | 293   | 327   | 4.47578002459 |
| NM_015963 | THAP4   | 1901  | 1975  | 5.47595353899 |
| NM_015960 | CUTC    | 590   | 641   | 5.95511830239 |
| NM_015960 | CUTC    | 473   | 533   | 4.95528532166 |
| NM_015966 | ERGIC3  | 1214  | 1316  | 4.39834914804 |
| NM_015966 | ERGIC3  | 52    | 159   | 3.26084562429 |
| NM_015966 | ERGIC3  | 739   | 889   | 4.74627245146 |
| NM_015966 | ERGIC3  | 162   | 672   | 6.66683798396 |
| NM_015966 | ERGIC3  | 1119  | 1214  | 3.9389175294  |
| NM_015966 | ERGIC3  | 922   | 1078  | 4.39834914804 |
| NM_015965 | NDUFA13 | 371   | 421   | 2.72430832267 |
| NM_015965 | NDUFA13 | 314   | 366   | 2.72430833022 |
| NM_015965 | NDUFA13 | 83    | 307   | 5.46127392439 |
| NM_015965 | NDUFA13 | 452   | 534   | 2.72430833022 |
| NM_015969 | MRPS17  | 150   | 195   | 6.31158955037 |
| NM_015969 | MRPS17  | 28    | 137   | 7.53398220763 |
| NM_015969 | MRPS17  | 380   | 478   | 6.72662728535 |
| NM_004566 | PFKFB3  | 4355  | 4438  | 8.51338365356 |

|              |         |      |      |               |
|--------------|---------|------|------|---------------|
| NM_138447    | ZNF689  | 588  | 640  | 8.56179078431 |
| NM_138446    | C7orf30 | 344  | 382  | 6.64099675927 |
| NM_138446    | C7orf30 | 388  | 432  | 6.96309859693 |
| NM_138446    | C7orf30 | 610  | 676  | 6.22613301009 |
| NM_138446    | C7orf30 | 172  | 295  | 7.22613301031 |
| NM_138446    | C7orf30 | 458  | 562  | 7.22613301031 |
| NM_138443    | HAUS1   | 881  | 923  | 4.11778953857 |
| NM_138443    | HAUS1   | 421  | 465  | 5.0338240795  |
| NM_138442    | CCDC124 | 9    | 69   | 5.60812803506 |
| NM_138442    | CCDC124 | 191  | 258  | 6.60812802751 |
| NM_138442    | CCDC124 | 649  | 734  | 5.60812802751 |
| NM_172251    | MRPL54  | 241  | 322  | 6.918398797   |
| NM_001136538 | ACAD10  | 538  | 581  | 9.06213989318 |
| NM_001136538 | ACAD10  | 1302 | 1354 | 8.05829604333 |
| NM_007317    | KIF22   | 472  | 517  | 5.46044528344 |
| NM_007317    | KIF22   | 412  | 461  | 5.5445844926  |
| NM_007317    | KIF22   | 266  | 376  | 7.12954699355 |
| NM_007317    | KIF22   | 1364 | 1411 | 5.54056689265 |
| NM_007317    | KIF22   | 100  | 258  | 6.54458449282 |
| NM_007317    | KIF22   | 1438 | 1561 | 7.12954699355 |
| NM_007317    | KIF22   | 839  | 901  | 7.12954699332 |
| NM_007317    | KIF22   | 1066 | 1212 | 8.12954699355 |
| NM_007317    | KIF22   | 573  | 652  | 6.54458425691 |
| NM_007317    | KIF22   | 912  | 1062 | 8.54458449282 |
| NM_007317    | KIF22   | 1779 | 1849 | 5.54056689265 |
| NM_001164459 | ACTR3C  | 247  | 288  | 10.8192466254 |
| NM_001164459 | ACTR3C  | 484  | 551  | 11.2344511439 |
| NM_001164459 | ACTR3C  | 177  | 230  | 10.8194203681 |
| NM_020654    | SENP7   | 2134 | 2205 | 7.40649361576 |
| NM_020654    | SENP7   | 3064 | 3122 | 5.90165272425 |
| NM_001024666 | SH3KBP1 | 2202 | 2260 | 5.68083102132 |
| NM_001024666 | SH3KBP1 | 880  | 948  | 6.34992600037 |
| NM_001024666 | SH3KBP1 | 750  | 812  | 4.76479648039 |
| NM_001032288 | UBE2V1  | 846  | 913  | 3.42824040759 |
| NM_001032288 | UBE2V1  | 568  | 641  | 4.16520623767 |
| NM_001032288 | UBE2V1  | 1820 | 1889 | 1.83926054261 |
| NM_001032288 | UBE2V1  | 89   | 142  | 1.7591389334  |
| NM_001032288 | UBE2V1  | 800  | 843  | 1.84310439247 |
| NM_001032288 | UBE2V1  | 960  | 1009 | 2.83926054261 |
| NM_001032288 | UBE2V1  | 1312 | 1379 | 1.84327814279 |
| NM_001032288 | UBE2V1  | 1515 | 1606 | 1.84327814279 |
| NM_001032281 | TFPI    | 507  | 715  | 4.51665438846 |
| NM_001032281 | TFPI    | 716  | 921  | 4.61974788142 |
| NM_001032281 | TFPI    | 15   | 492  | 5.54312659982 |
| NM_002926    | RGS12   | 1729 | 1783 | 6.84574141792 |
| NM_002926    | RGS12   | 1045 | 1105 | 7.84574164629 |
| NM_002926    | RGS12   | 1115 | 1229 | 8.4306974235  |
| XM_929503    | OSTCP2  | 141  | 211  | 10.2136931117 |
| XM_929503    | OSTCP2  | 433  | 483  | 8.89175828573 |
| XM_929503    | OSTCP2  | 232  | 269  | 7.89176500923 |

|           |       |       |       |               |
|-----------|-------|-------|-------|---------------|
| NM_031407 | HUWE1 | 5186  | 5236  | 4.7320284017  |
| NM_031407 | HUWE1 | 2761  | 2830  | 7.53939005481 |
| NM_031407 | HUWE1 | 3456  | 3540  | 7.05396322764 |
| NM_031407 | HUWE1 | 11956 | 12021 | 6.73203489683 |
| NM_031407 | HUWE1 | 9618  | 9698  | 5.7320351252  |
| NM_031407 | HUWE1 | 10003 | 10072 | 6.31699763347 |
| NM_031407 | HUWE1 | 13669 | 13715 | 5.73186138243 |
| NM_031407 | HUWE1 | 11657 | 11739 | 6.73203513275 |
| NM_031407 | HUWE1 | 1984  | 2022  | 7.05395649658 |
| NM_031407 | HUWE1 | 5063  | 5129  | 4.64789592337 |
| NM_031407 | HUWE1 | 3936  | 4003  | 5.7320351252  |
| NM_031407 | HUWE1 | 12225 | 12327 | 6.31699763347 |
| NM_031407 | HUWE1 | 723   | 815   | 8.05396322764 |
| NM_031407 | HUWE1 | 1173  | 1215  | 4.73203489683 |
| NM_031407 | HUWE1 | 12809 | 12846 | 4.73186138243 |
| NM_031407 | HUWE1 | 6847  | 6914  | 4.73186138243 |
| NM_031407 | HUWE1 | 12105 | 12160 | 4.7320284017  |
| NM_031407 | HUWE1 | 4491  | 4556  | 6.31699763347 |
| NM_031407 | HUWE1 | 5307  | 5375  | 6.73203513275 |
| NM_031407 | HUWE1 | 10439 | 10496 | 5.73203513253 |
| NM_031407 | HUWE1 | 11580 | 11656 | 5.7320351252  |
| NM_031407 | HUWE1 | 5457  | 5524  | 5.73203513275 |
| NM_031407 | HUWE1 | 3575  | 3641  | 7.90196013419 |
| NM_031407 | HUWE1 | 5618  | 5691  | 6.31699763347 |
| NM_031407 | HUWE1 | 2710  | 2759  | 4.73203513275 |
| NM_031407 | HUWE1 | 3308  | 3407  | 4.73203513275 |
| NM_031407 | HUWE1 | 12678 | 12799 | 8.05396322764 |
| NM_031407 | HUWE1 | 4959  | 5062  | 5.73203513253 |
| NM_031407 | HUWE1 | 5242  | 5296  | 6.73203513274 |
| NM_031407 | HUWE1 | 13545 | 13605 | 6.31699763347 |
| NM_031407 | HUWE1 | 10153 | 10240 | 4.73203513275 |
| NM_031407 | HUWE1 | 1767  | 1802  | 5.72801753258 |
| NM_031407 | HUWE1 | 815   | 890   | 5.73203513275 |
| NM_031407 | HUWE1 | 10384 | 10432 | 6.73203489683 |
| NM_031407 | HUWE1 | 6642  | 6754  | 7.05396322764 |
| NM_031407 | HUWE1 | 1476  | 1533  | 5.7320284017  |
| NM_031407 | HUWE1 | 2430  | 2522  | 6.73203513275 |
| NM_031407 | HUWE1 | 8555  | 8622  | 4.73203513274 |
| NM_031407 | HUWE1 | 13130 | 13294 | 8.31699763347 |
| NM_031407 | HUWE1 | 9880  | 9981  | 7.53939005481 |
| NM_031407 | HUWE1 | 8188  | 8370  | 6.31699763347 |
| NM_031407 | HUWE1 | 1806  | 1857  | 4.72801753258 |
| NM_031407 | HUWE1 | 8792  | 8843  | 4.72801753258 |
| NM_031407 | HUWE1 | 6608  | 6642  | 4.64789592337 |
| NM_031407 | HUWE1 | 13899 | 14033 | 7.05396322764 |
| NM_031407 | HUWE1 | 13003 | 13056 | 4.7320351252  |
| NM_031407 | HUWE1 | 9718  | 9798  | 6.31699763347 |
| NM_031407 | HUWE1 | 7566  | 7922  | 8.73203513275 |
| NM_031407 | HUWE1 | 6076  | 6275  | 8.05396322764 |
| NM_031407 | HUWE1 | 7201  | 7271  | 4.73186138243 |

|           |         |       |       |                 |
|-----------|---------|-------|-------|-----------------|
| NM_031407 | HUWE1   | 12410 | 12521 | 7.05396322764   |
| NM_031407 | HUWE1   | 3151  | 3276  | 7.53939005481   |
| NM_031407 | HUWE1   | 11427 | 11521 | 7.05396322764   |
| NM_031407 | HUWE1   | 4557  | 4655  | 5.73203513275   |
| NM_031407 | HUWE1   | 1307  | 1473  | 8.53939005481   |
| NM_031407 | HUWE1   | 9142  | 9233  | 6.73203513275   |
| NM_031407 | HUWE1   | 2203  | 2416  | 8.05396322764   |
| NM_031407 | HUWE1   | 920   | 1144  | 7.90196013419   |
| NM_031407 | HUWE1   | 7429  | 7564  | 7.31699763347   |
| NM_031407 | HUWE1   | 1550  | 1678  | 7.53939005481   |
| NM_031407 | HUWE1   | 2064  | 2198  | 8.19146675139   |
| NM_031407 | HUWE1   | 11798 | 11891 | 5.7320284017    |
| NM_031407 | HUWE1   | 5850  | 6002  | 7.05396322764   |
| NM_031407 | HUWE1   | 13794 | 13883 | 6.31699763347   |
| NM_031407 | HUWE1   | 5695  | 5840  | 7.90196013419   |
| NM_031407 | HUWE1   | 10723 | 10797 | 5.73186138243   |
| NM_031407 | HUWE1   | 1857  | 1943  | 6.73203513275   |
| NM_031407 | HUWE1   | 7960  | 8104  | 7.05396322764   |
| NM_031407 | HUWE1   | 9498  | 9617  | 7.31699763347   |
| NM_031407 | HUWE1   | 2973  | 3060  | 4.73203513275   |
| NM_031407 | HUWE1   | 4310  | 4446  | 5.73203513275   |
| NM_031407 | HUWE1   | 4660  | 4907  | 8.73203513275   |
| NM_031407 | HUWE1   | 10506 | 10624 | 5.73203513275   |
| NM_031407 | HUWE1   | 8390  | 8546  | 6.31699763347   |
| NM_031407 | HUWE1   | 11096 | 11302 | 7.31699763347   |
| NM_031407 | HUWE1   | 7003  | 7080  | 4.73203513275   |
| NM_031407 | HUWE1   | 7084  | 7197  | 7.73203513275   |
| NM_031407 | HUWE1   | 4026  | 4232  | 8.31699763347   |
| NM_031407 | HUWE1   | 9338  | 9476  | 6.31699763347   |
| NM_031407 | HUWE1   | 12343 | 12393 | 6.31682388315   |
| NM_031407 | HUWE1   | 3693  | 3933  | 8.05396322764   |
| NM_031407 | HUWE1   | 12528 | 12652 | 6.31699763325   |
| NM_031407 | HUWE1   | 2831  | 2966  | 6.31699763347   |
| NM_031407 | HUWE1   | 6381  | 6504  | 7.05396322764   |
| NM_031407 | HUWE1   | 340   | 670   | 8.73203513275   |
| NM_031407 | HUWE1   | 10889 | 11002 | 7.05396322764   |
| NM_002923 | RGS2    | 347   | 406   | 11.2372723083   |
| NM_031157 | HNRNPA1 | 1701  | 1766  | 1.91976423132   |
| NM_031157 | HNRNPA1 | 27    | 257   | 4.59783613643   |
| NM_031157 | HNRNPA1 | 1199  | 1254  | -0.402170594619 |
| NM_031157 | HNRNPA1 | 1013  | 1147  | 3.05726775507   |
| NM_031157 | HNRNPA1 | 1256  | 1659  | 4.8832383553    |
| NM_031157 | HNRNPA1 | 657   | 953   | 4.05726775507   |
| NM_031157 | HNRNPA1 | 257   | 648   | 5.29827585458   |
| NM_153247 | SLC29A4 | 858   | 913   | 9.54082930005   |
| NM_153247 | SLC29A4 | 766   | 836   | 8.95184943507   |
| NM_153247 | SLC29A4 | 496   | 543   | 8.95586702769   |
| NM_153247 | SLC29A4 | 599   | 657   | 9.54082953596   |
| NM_153247 | SLC29A4 | 323   | 356   | 8.87172782586   |
| NM_153247 | SLC29A4 | 2757  | 2863  | 8.95586703524   |

|              |         |      |      |               |
|--------------|---------|------|------|---------------|
| NM_153247    | SLC29A4 | 1878 | 2027 | 10.540829536  |
| NM_153247    | SLC29A4 | 2270 | 2350 | 7.95586703524 |
| NM_153247    | SLC29A4 | 1212 | 1385 | 10.2777951301 |
| NM_024315    | C7orf23 | 550  | 633  | 6.40239295757 |
| NM_024315    | C7orf23 | 323  | 370  | 7.99136632741 |
| NM_024315    | C7orf23 | 382  | 453  | 7.40623680743 |
| NM_001081550 | THOC2   | 1294 | 1361 | 6.4503444255  |
| NM_001081550 | THOC2   | 1514 | 1560 | 4.86538192478 |
| NM_001081550 | THOC2   | 717  | 788  | 5.86939952495 |
| NM_001081550 | THOC2   | 1065 | 1130 | 6.45436178976 |
| NM_001081550 | THOC2   | 881  | 945  | 6.86939952473 |
| NM_001081550 | THOC2   | 1839 | 1893 | 4.86538192478 |
| NM_001081550 | THOC2   | 3065 | 3134 | 6.45418827536 |
| NM_001081550 | THOC2   | 965  | 1007 | 6.86538192478 |
| NM_001081550 | THOC2   | 3248 | 3332 | 6.45436202567 |
| NM_001081550 | THOC2   | 4299 | 4343 | 4.86538192478 |
| NM_001081550 | THOC2   | 3003 | 3053 | 7.19132088879 |
| NM_001081550 | THOC2   | 3525 | 3587 | 5.86538192478 |
| NM_001081550 | THOC2   | 3784 | 3876 | 5.8693995174  |
| NM_001081550 | THOC2   | 2082 | 2157 | 4.86939952473 |
| NM_024313    | NOL12   | 2704 | 2748 | 8.25318062421 |
| NM_024312    | GNPTAB  | 415  | 486  | 7.44956274481 |
| NM_024312    | GNPTAB  | 5287 | 5324 | 7.44555187569 |
| NM_024319    | C1orf35 | 885  | 927  | 7.05169307055 |
| NM_024319    | C1orf35 | 1016 | 1070 | 6.97157146134 |
| NM_024319    | C1orf35 | 133  | 186  | 8.05553692041 |
| NM_173701    | WARS    | 840  | 907  | 7.37736390706 |
| NM_173701    | WARS    | 1777 | 1868 | 6.96232617187 |
| NM_173701    | WARS    | 1991 | 2053 | 5.37334630689 |
| NM_173701    | WARS    | 393  | 432  | 6.96215265747 |
| NM_173701    | WARS    | 72   | 165  | 6.37736390706 |
| NM_173701    | WARS    | 1001 | 1079 | 5.37736389952 |
| NM_173701    | WARS    | 1306 | 1413 | 6.96232640779 |
| NM_173701    | WARS    | 621  | 670  | 6.29322469768 |
| NM_173701    | WARS    | 1639 | 1739 | 7.69929200195 |
| NM_173701    | WARS    | 452  | 556  | 6.37736389952 |
| NM_173701    | WARS    | 1505 | 1604 | 8.37736390706 |
| NM_173701    | WARS    | 718  | 832  | 6.96232640779 |
| NM_203495    | COMMD6  | 310  | 387  | 4.877407751   |
| NM_203495    | COMMD6  | 103  | 180  | 5.46237048742 |
| NM_001001655 | ALKBH2  | 815  | 854  | 6.03309892043 |
| NM_001001655 | ALKBH2  | 125  | 215  | 7.1172378939  |
| NM_014871    | PAN2    | 1164 | 1249 | 7.34080019054 |
| NM_024930    | ELOVL7  | 317  | 397  | 12.2384471587 |
| NM_024930    | ELOVL7  | 3777 | 3848 | 11.2384471511 |
| NM_024930    | ELOVL7  | 656  | 688  | 11.1543079493 |
| NM_024930    | ELOVL7  | 108  | 162  | 11.2344295585 |
| NM_024930    | ELOVL7  | 162  | 264  | 12.5603752536 |
| NM_024930    | ELOVL7  | 444  | 574  | 12.8234096594 |
| NM_024930    | ELOVL7  | 936  | 1096 | 13.2384471587 |

|           |           |      |      |               |               |
|-----------|-----------|------|------|---------------|---------------|
| NM_024930 | ELOVL7    | 834  | 900  | 11.2384469228 |               |
| NM_024930 | ELOVL7    | 726  | 774  | 11.1543079493 |               |
| NM_003527 | HIST1H2B0 |      | 203  | 342           | 10.6704577366 |
| NM_003527 | HIST1H2B0 |      | 17   | 70            | 10.6704577365 |
| NM_003526 | HIST1H2BC |      | 81   | 303           | 10.7959886186 |
| NM_003520 | HIST1H2BN |      | 103  | 147           | 7.14689554458 |
| NM_003520 | HIST1H2BN |      | 157  | 219           | 9.95425070256 |
| NM_003528 | HIST2H2BE |      | 10   | 111           | 10.0074927238 |
| NM_003528 | HIST2H2BE |      | 111  | 268           | 10.4225302231 |
| NM_003528 | HIST2H2BE |      | 288  | 345           | 8.33839101373 |
| NM_003528 | HIST2H2BE |      | 449  | 490           | 8.41851262294 |
| NM_014046 | MRPS18B   | 154  | 190  | 4.62769107426 |               |
| NM_014046 | MRPS18B   | 344  | 388  | 4.71165653332 |               |
| NM_014046 | MRPS18B   | 1232 | 1318 | 3.71183028364 |               |
| NM_014046 | MRPS18B   | 394  | 553  | 6.88175528508 |               |
| NM_014046 | MRPS18B   | 1434 | 1503 | 3.71182355259 |               |
| NM_014046 | MRPS18B   | 229  | 335  | 6.29679278436 |               |
| NM_014763 | MRPL19    | 6450 | 6485 | 3.20582541279 |               |
| NM_014763 | MRPL19    | 2792 | 2847 | 3.285947022   |               |
| NM_014763 | MRPL19    | 4108 | 4164 | 4.87475337258 |               |
| NM_014763 | MRPL19    | 4715 | 4773 | 5.61189271706 |               |
| NM_014763 | MRPL19    | 5378 | 5448 | 4.28979087185 |               |
| NM_014763 | MRPL19    | 348  | 412  | 3.285947022   |               |
| NM_014763 | MRPL19    | 746  | 799  | 4.87090952272 |               |
| NM_014763 | MRPL19    | 261  | 342  | 4.87492712267 |               |
| NM_014763 | MRPL19    | 590  | 664  | 4.28979087185 |               |
| NM_014763 | MRPL19    | 1995 | 2090 | 4.79078791351 |               |
| NM_014763 | MRPL19    | 7468 | 7517 | 4.285947022   |               |
| NM_014763 | MRPL19    | 5593 | 5693 | 3.28996462217 |               |
| NM_014763 | MRPL19    | 436  | 586  | 6.09731954423 |               |
| NM_014763 | MRPL19    | 1372 | 1419 | 3.20582541279 |               |
| NM_014763 | MRPL19    | 1795 | 1879 | 3.28995789112 |               |
| NM_014762 | DHCR24    | 3508 | 3640 | 6.82029711805 |               |
| NM_014762 | DHCR24    | 3686 | 4266 | 8.49836902316 |               |
| NM_014762 | DHCR24    | 2464 | 3491 | 9.71753754362 |               |
| NM_014762 | DHCR24    | 24   | 124  | 4.08333152366 |               |
| NM_014762 | DHCR24    | 125  | 2462 | 10.9536962435 |               |
| NM_014761 | IST1      | 1929 | 1996 | 4.34403655699 |               |
| NM_014761 | IST1      | 863  | 909  | 4.34403655699 |               |
| NM_014761 | IST1      | 2137 | 2251 | 5.66596465188 |               |
| NM_014761 | IST1      | 2087 | 2129 | 4.34403632107 |               |
| NM_014761 | IST1      | 1138 | 1285 | 6.34403655699 |               |
| NM_014761 | IST1      | 303  | 375  | 5.92899905771 |               |
| NM_014761 | IST1      | 1811 | 1911 | 3.34403654944 |               |
| NM_014761 | IST1      | 916  | 1086 | 6.15139147905 |               |
| NM_014761 | IST1      | 2337 | 2418 | 4.92899905771 |               |
| NM_014761 | IST1      | 377  | 558  | 7.15139147905 |               |
| NM_014761 | IST1      | 1288 | 1430 | 6.51396155844 |               |
| NM_014761 | IST1      | 626  | 724  | 4.92899905771 |               |
| NM_014761 | IST1      | 90   | 296  | 6.66596465188 |               |



|           |        |      |      |               |
|-----------|--------|------|------|---------------|
| NM_014760 | TATDN2 | 3393 | 3461 | 8.83886793633 |
| NM_014760 | TATDN2 | 1004 | 1063 | 7.51711358421 |
| NM_014760 | TATDN2 | 2172 | 2216 | 8.10190234217 |
| NM_014760 | TATDN2 | 2432 | 2528 | 6.51693984145 |
| NM_014760 | TATDN2 | 289  | 335  | 6.51711335585 |
| NM_014760 | TATDN2 | 341  | 475  | 7.51711359176 |
| NM_014760 | TATDN2 | 4168 | 4224 | 7.51309599159 |
| NM_014760 | TATDN2 | 2661 | 2715 | 7.51309599159 |
| NM_014766 | SCRN1  | 838  | 911  | 6.78642630906 |
| NM_014766 | SCRN1  | 3930 | 4001 | 7.20146380812 |
| NM_014766 | SCRN1  | 5127 | 5175 | 6.19744620817 |
| NM_014766 | SCRN1  | 4874 | 4917 | 6.11732459896 |
| NM_014766 | SCRN1  | 740  | 794  | 6.78642630906 |
| NM_014766 | SCRN1  | 1164 | 1215 | 6.20146380834 |
| NM_014766 | SCRN1  | 3212 | 3298 | 6.20146380079 |
| NM_014766 | SCRN1  | 485  | 531  | 5.20145707729 |
| NM_014766 | SCRN1  | 2340 | 2386 | 5.20146380079 |
| NM_014766 | SCRN1  | 2540 | 2591 | 5.20146357242 |
| NM_014766 | SCRN1  | 332  | 404  | 7.52339190323 |
| NM_014766 | SCRN1  | 3684 | 3731 | 5.20129005802 |
| NM_014766 | SCRN1  | 4028 | 4077 | 6.78642607314 |
| NM_014766 | SCRN1  | 1485 | 1617 | 8.20146380834 |
| NM_014766 | SCRN1  | 214  | 331  | 8.52339190323 |
| NM_014766 | SCRN1  | 2958 | 3065 | 7.52339190323 |
| NM_014766 | SCRN1  | 541  | 723  | 8.78642630906 |
| NM_014766 | SCRN1  | 2432 | 2510 | 6.20146380834 |
| NM_014766 | SCRN1  | 2007 | 2092 | 6.20146380834 |
| NM_014766 | SCRN1  | 918  | 1076 | 8.20146380834 |
| NM_014766 | SCRN1  | 1621 | 1737 | 7.52339190323 |
| NM_014766 | SCRN1  | 3442 | 3545 | 6.20146380834 |
| NM_014766 | SCRN1  | 4924 | 5089 | 8.52339190323 |
| NM_014766 | SCRN1  | 2134 | 2178 | 5.19744620817 |
| NM_014766 | SCRN1  | 3068 | 3145 | 5.20146380812 |
| NM_014766 | SCRN1  | 1287 | 1428 | 7.20146380834 |
| NM_014766 | SCRN1  | 4385 | 4489 | 7.52339190323 |
| NM_014766 | SCRN1  | 4668 | 4773 | 8.52339190323 |
| NM_014765 | TOMM20 | 277  | 348  | 4.36297641277 |
| NM_014765 | TOMM20 | 3112 | 3146 | 1.69387470267 |
| NM_014765 | TOMM20 | 462  | 692  | 6.68490450766 |
| NM_014765 | TOMM20 | 352  | 442  | 4.36297641277 |
| NM_014765 | TOMM20 | 106  | 266  | 4.94793891349 |
| NM_014765 | TOMM20 | 1040 | 1189 | 5.36297641277 |
| NM_014765 | TOMM20 | 1293 | 1479 | 4.58536883411 |
| NM_014765 | TOMM20 | 692  | 784  | 4.36297641277 |
| NM_014765 | TOMM20 | 1526 | 1682 | 5.36297641277 |
| NM_014765 | TOMM20 | 1990 | 2179 | 5.23744553069 |
| NM_014765 | TOMM20 | 1859 | 1931 | 3.77399631188 |
| NM_014764 | DAZAP2 | 1946 | 2014 | 9.02470201364 |
| NM_014764 | DAZAP2 | 942  | 1002 | 9.43973951315 |
| NM_014764 | DAZAP2 | 1775 | 1806 | 7.43572191297 |

|              |         |      |      |               |
|--------------|---------|------|------|---------------|
| NM_014764    | DAZAP2  | 367  | 435  | 9.02470201387 |
| NM_014764    | DAZAP2  | 287  | 348  | 7.43973951292 |
| NM_014764    | DAZAP2  | 1007 | 1043 | 8.43973278209 |
| NM_014764    | DAZAP2  | 1412 | 1459 | 7.43572191297 |
| NM_014764    | DAZAP2  | 708  | 745  | 7.35560030376 |
| NM_014764    | DAZAP2  | 1827 | 1946 | 10.4397395131 |
| NM_014764    | DAZAP2  | 446  | 483  | 8.43572191297 |
| NM_014764    | DAZAP2  | 1212 | 1345 | 10.2470944352 |
| NM_014764    | DAZAP2  | 1463 | 1555 | 7.43973927723 |
| NM_005255    | GAK     | 2012 | 2083 | 7.06547012511 |
| NM_005255    | GAK     | 4062 | 4119 | 7.65043262562 |
| NM_005255    | GAK     | 3699 | 3766 | 7.65043262562 |
| NM_005255    | GAK     | 340  | 397  | 6.06546339407 |
| NM_005255    | GAK     | 598  | 677  | 6.06547011757 |
| NM_005255    | GAK     | 757  | 826  | 6.06547012512 |
| NM_005255    | GAK     | 3766 | 3827 | 7.06145252495 |
| NM_005255    | GAK     | 2972 | 3011 | 5.98133091573 |
| NM_005255    | GAK     | 3106 | 3213 | 9.06547012512 |
| NM_005255    | GAK     | 3828 | 3889 | 8.38739148895 |
| NM_005255    | GAK     | 3406 | 3458 | 6.06145252495 |
| NM_005255    | GAK     | 1485 | 1568 | 7.65043262584 |
| NM_005255    | GAK     | 2346 | 2395 | 6.06546339407 |
| NM_005255    | GAK     | 2121 | 2182 | 6.06145252495 |
| NM_005255    | GAK     | 2206 | 2335 | 8.06547012512 |
| NM_005255    | GAK     | 1669 | 1789 | 8.06547012512 |
| NM_005255    | GAK     | 2502 | 2555 | 6.0654698892  |
| NM_005255    | GAK     | 866  | 1032 | 7.65043262584 |
| NM_005255    | GAK     | 4352 | 4533 | 9.06547012512 |
| NM_001146213 | TBC1D15 | 1338 | 1392 | 4.46887912775 |
| NM_001146213 | TBC1D15 | 578  | 639  | 6.05384835952 |
| NM_001146213 | TBC1D15 | 1539 | 1597 | 6.4688858588  |
| NM_001146213 | TBC1D15 | 1937 | 1992 | 6.46888562289 |
| NM_001146213 | TBC1D15 | 1642 | 1743 | 7.4688858588  |
| NM_001146213 | TBC1D15 | 160  | 252  | 6.05384835952 |
| NM_001146213 | TBC1D15 | 312  | 386  | 6.05384835198 |
| NM_005257    | GATA6   | 2141 | 2185 | 12.2348243372 |
| NM_005257    | GATA6   | 1747 | 1805 | 12.3149459464 |
| NM_005257    | GATA6   | 2558 | 2647 | 11.3189633106 |
| NM_005256    | GAS2    | 518  | 570  | 7.99358618303 |
| NM_006098    | GNB2L1  | 869  | 1087 | 1.90206509941 |
| NM_006098    | GNB2L1  | 6    | 860  | 4.38749192659 |
| NM_032172    | USP42   | 3517 | 3579 | 9.70838233224 |
| NM_032172    | USP42   | 271  | 355  | 8.70838906328 |
| NM_032171    | CEP78   | 624  | 682  | 7.97650807607 |
| NM_032177    | PHAX    | 770  | 801  | 4.33162330387 |
| NM_032177    | PHAX    | 197  | 253  | 5.33564066813 |
| NM_032177    | PHAX    | 2275 | 2309 | 4.25150169466 |
| NM_032174    | TOMM40L | 173  | 240  | 6.97818385693 |
| NM_032174    | TOMM40L | 1116 | 1181 | 7.97819058044 |
| NM_032174    | TOMM40L | 2702 | 2766 | 6.97417298781 |

|           |          |      |      |               |               |
|-----------|----------|------|------|---------------|---------------|
| NM_032174 | TOMM40L  | 2526 | 2569 | 7.97417298781 |               |
| NM_032174 | TOMM40L  | 2119 | 2194 | 8.56315308116 |               |
| NM_032174 | TOMM40L  | 732  | 801  | 7.97819058044 |               |
| NM_032175 | UTP15    | 1147 | 1199 | 6.2655826454  |               |
| NM_032175 | UTP15    | 754  | 845  | 8.26960000965 |               |
| NM_002081 | GPC1     | 1124 | 1229 | 11.489480467  |               |
| NM_002081 | GPC1     | 1027 | 1111 | 10.489480467  |               |
| NM_002081 | GPC1     | 3611 | 3677 | 11.0744429678 |               |
| NM_002081 | GPC1     | 1612 | 1675 | 11.489480467  |               |
| NM_002081 | GPC1     | 765  | 800  | 10.4894804595 |               |
| NM_002081 | GPC1     | 1905 | 1965 | 9.48947373598 |               |
| NM_002081 | GPC1     | 540  | 630  | 9.48948046703 |               |
| NM_002081 | GPC1     | 631  | 685  | 11.0744429678 |               |
| NM_002081 | GPC1     | 862  | 1019 | 11.8114085619 |               |
| NM_002081 | GPC1     | 1735 | 1820 | 11.0744429678 |               |
| NM_002081 | GPC1     | 363  | 493  | 9.48948046703 |               |
| NM_018685 | ANLN     | 1052 | 1111 | 7.17699019674 |               |
| NM_018685 | ANLN     | 754  | 804  | 5.8550553708  |               |
| NM_018685 | ANLN     | 2601 | 2653 | 7.66241702391 |               |
| NM_018685 | ANLN     | 1747 | 1800 | 5.85506186593 |               |
| NM_018685 | ANLN     | 3868 | 3963 | 7.17699019674 |               |
| NM_018685 | ANLN     | 914  | 957  | 7.17699019673 |               |
| NM_018685 | ANLN     | 657  | 734  | 7.66241702391 |               |
| NM_018685 | ANLN     | 60   | 134  | 6.44001787152 |               |
| NM_018685 | ANLN     | 1135 | 1223 | 4.85506210185 |               |
| NM_018685 | ANLN     | 1360 | 1427 | 4.8550620943  |               |
| NM_018685 | ANLN     | 565  | 656  | 7.17699019674 |               |
| NM_018685 | ANLN     | 3969 | 4043 | 7.44002460257 |               |
| NM_018685 | ANLN     | 4577 | 4694 | 8.44002460257 |               |
| NM_018685 | ANLN     | 2363 | 2599 | 8.31449372049 |               |
| NM_018685 | ANLN     | 3445 | 3570 | 8.31449372049 |               |
| NM_018685 | ANLN     | 3137 | 3445 | 10.1404643207 |               |
| NM_018685 | ANLN     | 398  | 531  | 8.55550181999 |               |
| NM_018685 | ANLN     | 3739 | 3810 | 5.85506210185 |               |
| NM_018685 | ANLN     | 4379 | 4492 | 7.17699019674 |               |
| NM_018685 | ANLN     | 1838 | 1989 | 8.44002460257 |               |
| NM_018685 | ANLN     | 4233 | 4354 | 7.17699019674 |               |
| NM_018685 | ANLN     | 1244 | 1331 | 6.44002460257 |               |
| NM_018685 | ANLN     | 2870 | 3136 | 9.02498710329 |               |
| NM_018685 | ANLN     | 4063 | 4202 | 5.85506210185 |               |
| NM_018685 | ANLN     | 138  | 299  | 8.17699019674 |               |
| NM_018685 | ANLN     | 2726 | 2865 | 8.85506210185 |               |
| NM_018685 | ANLN     | 2092 | 2358 | 9.17699019674 |               |
| NM_018685 | ANLN     | 1493 | 1614 | 6.85506210185 |               |
| NM_018686 | CMAS     | 1675 | 1748 | 4.5514780954  |               |
| NM_018686 | CMAS     | 604  | 649  | 6.13627357685 |               |
| NM_018687 | C19orf80 |      | 265  | 363           | 7.41769706937 |
| NM_018687 | C19orf80 |      | 378  | 494           | 6.68073147521 |
| NM_018687 | C19orf80 |      | 701  | 812           | 5.09576897449 |
| NM_018687 | C19orf80 |      | 536  | 678           | 7.68073147521 |

|              |             |      |               |               |
|--------------|-------------|------|---------------|---------------|
| NM_018687    | C19orf80    | 10   | 256           | 8.0026595701  |
| NM_001010893 | SLC10A5 569 | 637  | 7.81851596187 |               |
| NM_018683    | RNF114 650  | 724  | 5.26527905148 |               |
| NM_018683    | RNF114 149  | 224  | 4.26126145153 |               |
| NM_001011546 | DSTN 153    | 224  | 3.62537761532 |               |
| NM_001011546 | DSTN 1640   | 1707 | 5.62537762286 |               |
| NM_001011546 | DSTN 388    | 895  | 8.75466063982 |               |
| NM_052963    | TOP1MT 1809 | 1864 | 4.21046407638 |               |
| NM_152995    | NFXL1 1358  | 1390 | 6.41697974883 |               |
| NM_032815    | NFATC2IP    | 2121 | 2166          | 8.38341984034 |
| NM_032815    | NFATC2IP    | 3179 | 3241          | 7.38743070946 |
| NM_032815    | NFATC2IP    | 1504 | 1543          | 7.38341984034 |
| NM_032815    | NFATC2IP    | 1953 | 2026          | 8.7093655354  |
| NM_032815    | NFATC2IP    | 815  | 865           | 7.38341984034 |
| NM_032815    | NFATC2IP    | 1133 | 1202          | 7.3874372046  |
| NM_032815    | NFATC2IP    | 3476 | 3538          | 6.38743070946 |
| NM_032815    | NFATC2IP    | 1282 | 1382          | 7.38743744051 |
| NM_032815    | NFATC2IP    | 137  | 218           | 8.70936552785 |
| NM_032815    | NFATC2IP    | 3370 | 3428          | 6.38341984034 |
| NM_052969    | RPL39L 537  | 669  | 4.11933869081 |               |
| NM_052969    | RPL39L 482  | 528  | 3.70430119152 |               |
| NM_052969    | RPL39L 379  | 450  | 3.11933195975 |               |
| NM_052969    | RPL39L 262  | 348  | 3.70430119153 |               |
| NM_152992    | POMZP3 854  | 955  | 8.68141298567 |               |
| NM_152992    | POMZP3 328  | 409  | 8.2663754864  |               |
| NM_152992    | POMZP3 130  | 199  | 9.68141298567 |               |
| NM_152992    | POMZP3 510  | 581  | 6.68140625462 |               |
| NM_152992    | POMZP3 583  | 672  | 8.2663754864  |               |
| NM_152992    | POMZP3 703  | 768  | 6.68141298567 |               |
| NM_032717    | AGPAT9 226  | 269  | 8.01904792758 |               |
| NM_032717    | AGPAT9 1898 | 1973 | 8.02306552775 |               |
| NM_032717    | AGPAT9 1299 | 1356 | 10.3449933867 |               |
| NM_032717    | AGPAT9 1477 | 1520 | 9.52388881909 |               |
| NM_032717    | AGPAT9 2111 | 2183 | 8.02306552775 |               |
| NM_032717    | AGPAT9 1368 | 1443 | 10.0230655278 |               |
| NM_032717    | AGPAT9 356  | 412  | 9.0230587967  |               |
| NM_032717    | AGPAT9 864  | 941  | 10.8304204498 |               |
| NM_032717    | AGPAT9 487  | 531  | 9.01904792758 |               |
| NM_032717    | AGPAT9 1241 | 1291 | 9.01904792758 |               |
| NM_032717    | AGPAT9 1081 | 1188 | 10.3449936226 |               |
| NM_032717    | AGPAT9 1521 | 1646 | 10.6080280285 |               |
| NM_032717    | AGPAT9 732  | 863  | 10.3449936226 |               |
| NM_032717    | AGPAT9 541  | 644  | 11.0230655278 |               |
| NM_032717    | AGPAT9 417  | 487  | 8.02306529183 |               |
| NM_032714    | INF2 678    | 727  | 5.81454916029 |               |
| NM_032714    | INF2 227    | 302  | 5.81856675291 |               |
| NM_032714    | INF2 332    | 387  | 5.81454916029 |               |
| NM_032714    | INF2 579    | 659  | 5.81856676046 |               |
| NM_003574    | VAPA 850    | 906  | 3.98664163144 |               |
| NM_003574    | VAPA 100    | 135  | 4.90652002223 |               |

|              |         |      |      |               |
|--------------|---------|------|------|---------------|
| NM_003574    | VAPA    | 1520 | 1579 | 3.99065923161 |
| NM_003574    | VAPA    | 618  | 684  | 6.31258732649 |
| NM_003574    | VAPA    | 152  | 188  | 4.98664163144 |
| NM_003574    | VAPA    | 1274 | 1337 | 5.49148252295 |
| NM_003574    | VAPA    | 972  | 1100 | 5.57562173233 |
| NM_003574    | VAPA    | 443  | 531  | 5.99065923161 |
| NM_003574    | VAPA    | 1144 | 1237 | 6.3125873265  |
| NM_001190946 | FAM193B | 623  | 725  | 9.6879047674  |
| NM_003575    | ZNF282  | 695  | 767  | 7.60143282068 |
| NM_003575    | ZNF282  | 3142 | 3225 | 6.59741522051 |
| NM_003575    | ZNF282  | 1095 | 1168 | 7.60142608963 |
| NM_032718    | MFSD9   | 217  | 263  | 9.00753334023 |
| NM_032718    | MFSD9   | 343  | 388  | 8.42257083951 |
| NM_032718    | MFSD9   | 288  | 334  | 8.42257083951 |
| NM_001077350 | NPRL3   | 2196 | 2278 | 8.26354650419 |
| NM_001077350 | NPRL3   | 725  | 781  | 7.34768571357 |
| NM_001077350 | NPRL3   | 945  | 1066 | 8.93264821429 |
| NM_183352    | SEC13   | 598  | 643  | 4.16979290753 |
| NM_183352    | SEC13   | 827  | 894  | 4.58483713786 |
| NM_183352    | SEC13   | 655  | 727  | 4.16979963836 |
| NM_183352    | SEC13   | 1280 | 1316 | 2.50069792848 |
| NM_183352    | SEC13   | 151  | 233  | 4.58483713786 |
| NM_183352    | SEC13   | 910  | 1039 | 4.58483713786 |
| NM_183352    | SEC13   | 428  | 534  | 4.58483713786 |
| NM_183352    | SEC13   | 309  | 420  | 4.16979963859 |
| NM_183356    | ASNS    | 1297 | 1352 | 4.22761265018 |
| NM_183356    | ASNS    | 1358 | 1411 | 4.22359505755 |
| NM_183356    | ASNS    | 1780 | 1836 | 5.22761265773 |
| NM_183356    | ASNS    | 1227 | 1294 | 5.81257515845 |
| NM_183356    | ASNS    | 1850 | 1930 | 5.22761265773 |
| NM_183356    | ASNS    | 720  | 769  | 5.81257515845 |
| NM_183356    | ASNS    | 1023 | 1132 | 4.22761265773 |
| NM_183356    | ASNS    | 522  | 593  | 4.8125751509  |
| NM_183356    | ASNS    | 2244 | 2281 | 3.22743890741 |
| NM_183356    | ASNS    | 1579 | 1678 | 5.54954075261 |
| NM_183356    | ASNS    | 1133 | 1221 | 4.81257515845 |
| NM_183356    | ASNS    | 863  | 1021 | 6.54954075261 |
| NM_183356    | ASNS    | 473  | 511  | 4.22359505755 |
| NM_183356    | ASNS    | 629  | 708  | 4.81257515844 |
| NM_183356    | ASNS    | 2076 | 2144 | 4.22760592667 |
| NM_183356    | ASNS    | 1415 | 1571 | 6.22761265773 |
| NM_001098632 | AKT1S1  | 1738 | 1785 | 8.10435426309 |
| NM_001098632 | AKT1S1  | 788  | 872  | 8.10435426309 |
| NM_001098632 | AKT1S1  | 1460 | 1614 | 10.1043542631 |
| NM_001098632 | AKT1S1  | 658  | 776  | 8.68931676381 |
| NM_001098632 | AKT1S1  | 386  | 481  | 7.10435426286 |
| NM_001098632 | AKT1S1  | 1659 | 1721 | 7.10434753203 |
| NM_001098632 | AKT1S1  | 81   | 202  | 9.10435426309 |
| NM_001098632 | AKT1S1  | 1201 | 1410 | 9.91170918514 |
| NM_001098638 | RNF169  | 988  | 1048 | 7.9606858507  |

|              |        |      |      |               |
|--------------|--------|------|------|---------------|
| NM_015140    | TTLL12 | 2466 | 2524 | 7.87824910498 |
| NM_015140    | TTLL12 | 1659 | 1723 | 7.87824910498 |
| NM_015140    | TTLL12 | 1332 | 1393 | 6.87842284775 |
| NM_015140    | TTLL12 | 969  | 1003 | 6.87440525513 |
| NM_015140    | TTLL12 | 1925 | 1984 | 8.46338534847 |
| NM_015140    | TTLL12 | 1498 | 1555 | 8.8784228553  |
| NM_015140    | TTLL12 | 1864 | 1924 | 6.8784228553  |
| NM_015140    | TTLL12 | 602  | 673  | 8.46338534847 |
| NM_015140    | TTLL12 | 1270 | 1325 | 6.87824910498 |
| NM_015140    | TTLL12 | 728  | 822  | 6.87842284775 |
| NM_015140    | TTLL12 | 1783 | 1864 | 7.87440525513 |
| NM_015140    | TTLL12 | 2811 | 2867 | 8.46338535602 |
| NM_015140    | TTLL12 | 1725 | 1759 | 7.79428364592 |
| NM_015140    | TTLL12 | 1031 | 1212 | 8.8784228553  |
| NM_015143    | METAP1 | 213  | 258  | 3.72959068254 |
| NM_015143    | METAP1 | 2267 | 2306 | 2.72574683268 |
| NM_015416    | LETMD1 | 660  | 718  | 6.34719666197 |
| NM_015416    | LETMD1 | 865  | 937  | 6.76223439717 |
| NM_015416    | LETMD1 | 1467 | 1577 | 6.76223439717 |
| NM_015416    | LETMD1 | 337  | 392  | 6.76222766611 |
| NM_015416    | LETMD1 | 1697 | 1753 | 5.76223439694 |
| NM_015416    | LETMD1 | 203  | 253  | 6.34719689034 |
| NM_015416    | LETMD1 | 58   | 170  | 7.34719689789 |
| NM_015416    | LETMD1 | 961  | 1069 | 7.08416249205 |
| NM_015416    | LETMD1 | 536  | 623  | 6.34719016683 |
| NM_015416    | LETMD1 | 1963 | 2108 | 6.34719689789 |
| NM_015415    | BRP44  | 248  | 326  | 8.78871791406 |
| NM_015415    | BRP44  | 660  | 725  | 8.56632549273 |
| NM_015415    | BRP44  | 172  | 222  | 5.98118924169 |
| NM_015415    | BRP44  | 344  | 390  | 6.98135626095 |
| NM_015415    | BRP44  | 1226 | 1289 | 5.981362992   |
| NM_015415    | BRP44  | 113  | 152  | 6.97734539183 |
| NM_015415    | BRP44  | 398  | 489  | 8.30329108689 |
| NM_015415    | BRP44  | 499  | 633  | 8.78871791406 |
| NM_015148    | PASK   | 3617 | 3673 | 8.29932422239 |
| NM_015148    | PASK   | 3740 | 3807 | 8.37944583161 |
| NM_001113547 | LIMA1  | 2427 | 2485 | 7.23248772436 |
| NM_001113547 | LIMA1  | 2718 | 2795 | 8.23650532453 |
| NM_001113547 | LIMA1  | 1115 | 1180 | 7.82146782525 |
| NM_001113547 | LIMA1  | 2056 | 2124 | 7.23650532453 |
| NM_001113547 | LIMA1  | 563  | 654  | 7.82146781771 |
| NM_001113547 | LIMA1  | 3032 | 3116 | 8.23650532453 |
| NM_001113547 | LIMA1  | 1198 | 1247 | 7.23649859348 |
| NM_001113547 | LIMA1  | 1815 | 1867 | 7.23650532453 |
| NM_001113547 | LIMA1  | 310  | 390  | 8.23650508861 |
| NM_001113547 | LIMA1  | 3134 | 3176 | 6.23248772436 |
| NM_001113547 | LIMA1  | 1888 | 1968 | 7.23650532453 |
| NM_001113547 | LIMA1  | 3281 | 3315 | 6.23649859348 |
| NM_001113547 | LIMA1  | 3189 | 3261 | 7.23650532453 |
| NM_001113547 | LIMA1  | 2144 | 2301 | 9.23650532453 |

|              |        |      |      |               |
|--------------|--------|------|------|---------------|
| NM_001113547 | LIMA1  | 1723 | 1813 | 9.23650532453 |
| NM_001113547 | LIMA1  | 788  | 873  | 8.23650532453 |
| NM_001113547 | LIMA1  | 663  | 745  | 7.82146781771 |
| NM_001113547 | LIMA1  | 1308 | 1481 | 8.23650532453 |
| NM_001113547 | LIMA1  | 2849 | 3027 | 9.04386024659 |
| NM_001099271 | POC5   | 692  | 746  | 8.81631897598 |
| NM_012430    | SEC22A | 365  | 426  | 9.61872224304 |
| NM_012430    | SEC22A | 1053 | 1102 | 7.69884385225 |
| NM_012430    | SEC22A | 205  | 259  | 8.61872224304 |
| NM_012430    | SEC22A | 281  | 326  | 8.70286145242 |
| NM_012430    | SEC22A | 872  | 936  | 8.70286144488 |
| NM_016827    | OGG1   | 702  | 763  | 6.99403783724 |
| NM_016827    | OGG1   | 380  | 491  | 7.99403807316 |
| NM_016824    | ADD3   | 434  | 512  | 5.21380600762 |
| NM_016824    | ADD3   | 781  | 847  | 6.21381273867 |
| NM_016824    | ADD3   | 1376 | 1456 | 6.53574083356 |
| NM_016824    | ADD3   | 4162 | 4218 | 4.21381273845 |
| NM_016824    | ADD3   | 2032 | 2120 | 5.79877523939 |
| NM_016824    | ADD3   | 953  | 992  | 5.21363898835 |
| NM_016824    | ADD3   | 1576 | 1639 | 5.21381273867 |
| NM_016824    | ADD3   | 2373 | 2449 | 5.21381273845 |
| NM_016824    | ADD3   | 1670 | 1758 | 6.53574083356 |
| NM_016824    | ADD3   | 1460 | 1540 | 5.79877523939 |
| NM_016824    | ADD3   | 4042 | 4157 | 5.79877523939 |
| NM_016824    | ADD3   | 3871 | 3926 | 4.2097951385  |
| NM_016824    | ADD3   | 1162 | 1263 | 5.21381273867 |
| NM_016824    | ADD3   | 3928 | 4013 | 5.21363898835 |
| NM_016824    | ADD3   | 1867 | 1970 | 5.79877523939 |
| NM_016823    | CRK    | 197  | 228  | 4.67260418388 |
| NM_016823    | CRK    | 276  | 327  | 4.75674339305 |
| NM_016823    | CRK    | 2683 | 2721 | 5.67260418388 |
| NM_016823    | CRK    | 465  | 520  | 6.34170565807 |
| NM_016823    | CRK    | 1970 | 2060 | 6.75674315735 |
| NM_016823    | CRK    | 1162 | 1225 | 7.34170589399 |
| NM_016823    | CRK    | 1227 | 1333 | 5.75674339327 |
| NM_016823    | CRK    | 2870 | 2910 | 5.7527257931  |
| NM_016823    | CRK    | 1537 | 1616 | 6.75674339326 |
| NM_016823    | CRK    | 2323 | 2374 | 4.7527257931  |
| NM_018230    | NUP133 | 1114 | 1167 | 4.88547410768 |
| NM_018230    | NUP133 | 3902 | 4008 | 4.88145650751 |
| NM_018230    | NUP133 | 3167 | 3212 | 5.88546737663 |
| NM_018230    | NUP133 | 1266 | 1306 | 5.88145650751 |
| NM_018230    | NUP133 | 2776 | 2822 | 6.47043660818 |
| NM_018230    | NUP133 | 311  | 373  | 7.47043637249 |
| NM_018230    | NUP133 | 1719 | 1769 | 4.88145650751 |
| NM_018230    | NUP133 | 1894 | 2016 | 6.88547410768 |
| NM_018230    | NUP133 | 2022 | 2085 | 5.88547410014 |
| NM_170665    | ATP2A2 | 4273 | 4362 | 7.09295906785 |
| NM_170665    | ATP2A2 | 4192 | 4256 | 5.39251934971 |
| NM_170665    | ATP2A2 | 6611 | 6663 | 3.39251934216 |

|           |         |      |      |               |
|-----------|---------|------|------|---------------|
| NM_170665 | ATP2A2  | 173  | 257  | 5.39251934971 |
| NM_170665 | ATP2A2  | 6063 | 6149 | 4.97748185043 |
| NM_170665 | ATP2A2  | 53   | 142  | 3.39251934971 |
| NM_170665 | ATP2A2  | 357  | 385  | 4.30838014032 |
| NM_170665 | ATP2A2  | 4586 | 4643 | 4.39251261865 |
| NM_170665 | ATP2A2  | 7413 | 7529 | 5.39251934971 |
| NM_170665 | ATP2A2  | 6790 | 6865 | 4.97748184288 |
| NM_170665 | ATP2A2  | 4076 | 4188 | 7.56244435115 |
| NM_170665 | ATP2A2  | 3869 | 4073 | 6.97748185043 |
| NM_170665 | ATP2A2  | 615  | 1250 | 10.1607036745 |
| NM_170665 | ATP2A2  | 8185 | 8279 | 4.97748185042 |
| NM_170665 | ATP2A2  | 4742 | 4877 | 4.39251934971 |
| NM_170665 | ATP2A2  | 4958 | 5061 | 3.39251911379 |
| NM_170665 | ATP2A2  | 7232 | 7317 | 4.97748185021 |
| NM_170665 | ATP2A2  | 8078 | 8160 | 4.97747511937 |
| NM_170665 | ATP2A2  | 1250 | 3856 | 12.4586085402 |
| NM_015601 | HERC4   | 1994 | 2056 | 5.99335947988 |
| NM_015601 | HERC4   | 3604 | 3658 | 7.49418300714 |
| NM_015601 | HERC4   | 155  | 269  | 6.9933597158  |
| NM_015601 | HERC4   | 443  | 512  | 6.98934211563 |
| NM_014049 | ACAD9   | 1085 | 1147 | 8.7263279815  |
| NM_014049 | ACAD9   | 1380 | 1449 | 7.14520933063 |
| NM_014049 | ACAD9   | 1675 | 1755 | 8.73033885062 |
| NM_014049 | ACAD9   | 1465 | 1581 | 8.14538308095 |
| NM_015355 | SUZ12   | 1844 | 1898 | 4.30839663451 |
| NM_015355 | SUZ12   | 3796 | 3863 | 6.31241423468 |
| NM_015355 | SUZ12   | 1736 | 1788 | 5.89335913523 |
| NM_015355 | SUZ12   | 1032 | 1109 | 4.31241399877 |
| NM_015355 | SUZ12   | 3560 | 3607 | 5.2282750253  |
| NM_015355 | SUZ12   | 737  | 803  | 4.31240750363 |
| NM_015355 | SUZ12   | 500  | 605  | 6.63434232957 |
| NM_015355 | SUZ12   | 1904 | 2003 | 4.31240750363 |
| NM_033446 | FAM125B | 392  | 440  | 6.82206244305 |
| NM_033446 | FAM125B | 3333 | 3374 | 6.82206244305 |
| NM_033446 | FAM125B | 3244 | 3305 | 5.82590629291 |
| NM_001319 | CSNK1G2 | 1346 | 1398 | 5.30803228099 |
| NM_001319 | CSNK1G2 | 2063 | 2138 | 6.308032281   |
| NM_001319 | CSNK1G2 | 508  | 552  | 6.89298805067 |
| NM_001319 | CSNK1G2 | 2569 | 2619 | 6.8928210314  |
| NM_001319 | CSNK1G2 | 1071 | 1126 | 6.308032281   |
| NM_001319 | CSNK1G2 | 459  | 508  | 6.30401468083 |
| NM_001319 | CSNK1G2 | 833  | 873  | 6.30401468083 |
| NM_001319 | CSNK1G2 | 1418 | 1470 | 5.308032281   |
| NM_001319 | CSNK1G2 | 2715 | 2907 | 9.11538720306 |
| NM_001319 | CSNK1G2 | 260  | 314  | 5.22389307162 |
| NM_001319 | CSNK1G2 | 1186 | 1240 | 5.30802554995 |
| NM_001319 | CSNK1G2 | 906  | 990  | 7.308032281   |
| NM_001319 | CSNK1G2 | 659  | 753  | 7.308032281   |
| NM_001319 | CSNK1G2 | 1934 | 2014 | 7.62996037589 |
| NM_001319 | CSNK1G2 | 1715 | 1782 | 6.30803228099 |



|           |         |      |      |               |
|-----------|---------|------|------|---------------|
| NM_015701 | ERLEC1  | 1441 | 1491 | 3.59710784621 |
| NM_015701 | ERLEC1  | 1529 | 1602 | 2.59309025359 |
| NM_015701 | ERLEC1  | 1933 | 1987 | 4.18207035448 |
| NM_015701 | ERLEC1  | 1325 | 1365 | 3.59710112271 |
| NM_015701 | ERLEC1  | 1668 | 1729 | 2.59309025359 |
| NM_015701 | ERLEC1  | 1602 | 1644 | 4.59309025359 |
| NM_015701 | ERLEC1  | 771  | 850  | 2.59693410345 |
| NM_015701 | ERLEC1  | 1773 | 1879 | 5.40446277582 |
| NM_001315 | MAPK14  | 2439 | 2502 | 6.2220175923  |
| NM_001315 | MAPK14  | 3630 | 3685 | 4.63705509158 |
| NM_001315 | MAPK14  | 621  | 653  | 5.55291588241 |
| NM_001315 | MAPK14  | 558  | 613  | 6.95898318669 |
| NM_001315 | MAPK14  | 825  | 848  | 5.55291588241 |
| NM_001315 | MAPK14  | 1706 | 1814 | 6.95898318669 |
| NM_001315 | MAPK14  | 1415 | 1463 | 4.63705485588 |
| NM_001315 | MAPK14  | 3774 | 3856 | 5.6370550918  |
| NM_001315 | MAPK14  | 1255 | 1391 | 7.44441001386 |
| NM_001315 | MAPK14  | 3163 | 3212 | 5.63303749162 |
| NM_001315 | MAPK14  | 654  | 822  | 6.6370550918  |
| NM_001315 | MAPK14  | 872  | 1153 | 8.6370550918  |
| NM_001315 | MAPK14  | 1541 | 1597 | 4.63705485588 |
| NM_001315 | MAPK14  | 2089 | 2257 | 6.95898318669 |
| NM_001315 | MAPK14  | 3269 | 3332 | 4.63303749162 |
| NM_001316 | CSE1L   | 2491 | 2544 | 5.81114050456 |
| NM_001316 | CSE1L   | 381  | 466  | 5.81113377351 |
| NM_001316 | CSE1L   | 137  | 181  | 4.22216040366 |
| NM_001316 | CSE1L   | 3128 | 3187 | 4.22617776792 |
| NM_001316 | CSE1L   | 2755 | 2822 | 7.0335329259  |
| NM_001316 | CSE1L   | 182  | 223  | 5.81114026864 |
| NM_001316 | CSE1L   | 1747 | 1797 | 6.22216040366 |
| NM_001316 | CSE1L   | 2104 | 2148 | 5.81113377351 |
| NM_001316 | CSE1L   | 1646 | 1708 | 5.22216040366 |
| NM_001316 | CSE1L   | 1371 | 1426 | 6.22617799629 |
| NM_001316 | CSE1L   | 1286 | 1370 | 5.81114050456 |
| NM_001316 | CSE1L   | 2423 | 2481 | 4.14203879445 |
| NM_001316 | CSE1L   | 2298 | 2378 | 6.54810609873 |
| NM_001316 | CSE1L   | 223  | 342  | 6.54810609873 |
| NM_001316 | CSE1L   | 554  | 622  | 4.22617127278 |
| NM_001316 | CSE1L   | 2845 | 2943 | 6.22617800384 |
| NM_001316 | CSE1L   | 1798 | 1892 | 6.54810609873 |
| NM_001316 | CSE1L   | 1992 | 2032 | 5.22216040366 |
| NM_001316 | CSE1L   | 868  | 942  | 6.81114050456 |
| NM_001316 | CSE1L   | 968  | 1086 | 5.22617800384 |
| NM_001316 | CSE1L   | 3388 | 3480 | 5.81114050455 |
| NM_001316 | CSE1L   | 1111 | 1274 | 6.81114050456 |
| NM_001316 | CSE1L   | 2661 | 2755 | 6.22617800384 |
| NM_001316 | CSE1L   | 656  | 843  | 7.92661772198 |
| NM_174921 | C4orf34 | 335  | 373  | 9.43310967098 |
| NM_174921 | C4orf34 | 171  | 243  | 10.1022113811 |
| NM_174921 | C4orf34 | 947  | 1028 | 8.51323128019 |

|              |          |      |      |                 |               |
|--------------|----------|------|------|-----------------|---------------|
| NM_006999    | PAPD7    | 3323 | 3374 | 8.22705531241   |               |
| NM_006999    | PAPD7    | 680  | 731  | 5.90128336767   |               |
| NM_006999    | PAPD7    | 2346 | 2391 | 5.90530073192   |               |
| NM_006999    | PAPD7    | 2778 | 2843 | 5.90530096784   |               |
| NM_006999    | PAPD7    | 171  | 248  | 5.90512721752   |               |
| NM_006999    | PAPD7    | 989  | 1090 | 6.90530096029   |               |
| NM_006999    | PAPD7    | 1954 | 2056 | 6.90530096762   |               |
| NM_015358    | MORC3    | 2766 | 2824 | 4.82010290439   |               |
| NM_015358    | MORC3    | 2507 | 2587 | 5.81992915408   |               |
| NM_018584    | CAMK2N1  | 47   | 93   | 0.0638450495745 |               |
| NM_018584    | CAMK2N1  | 1434 | 1482 | 1.1479775279    |               |
| NM_018584    | CAMK2N1  | 281  | 333  | 0.0638450495745 |               |
| NM_018584    | CAMK2N1  | 137  | 192  | 0.143966658785  |               |
| NM_018584    | CAMK2N1  | 396  | 439  | 1.06384504957   |               |
| NM_018584    | CAMK2N1  | 2032 | 2112 | 2.46991235385   |               |
| NM_018584    | CAMK2N1  | 995  | 1100 | 2.14798425896   |               |
| NM_018584    | CAMK2N1  | 1492 | 1642 | 1.73294675968   |               |
| NM_001135208 | FKBP2    | 106  | 179  | 8.30601621438   |               |
| NM_001135208 | FKBP2    | 270  | 333  | 6.98408138844   |               |
| NM_021202    | TP53INP2 |      | 3249 | 3299            | 8.71640179695 |
| NM_021202    | TP53INP2 |      | 3941 | 3983            | 8.71639530182 |
| NM_021202    | TP53INP2 |      | 2483 | 2565            | 8.71640203287 |
| NM_021202    | TP53INP2 |      | 3305 | 3394            | 7.71622828255 |
| NM_021202    | TP53INP2 |      | 1470 | 1533            | 8.71622828255 |
| NM_021202    | TP53INP2 |      | 1627 | 1680            | 7.71640179695 |
| NM_021202    | TP53INP2 |      | 187  | 242             | 8.63226282349 |
| NM_021202    | TP53INP2 |      | 3901 | 3940            | 7.7123844327  |
| NM_021202    | TP53INP2 |      | 3173 | 3233            | 8.71640203287 |
| NM_021202    | TP53INP2 |      | 1843 | 1939            | 8.7123844327  |
| NM_021202    | TP53INP2 |      | 3417 | 3513            | 9.71640203287 |
| NM_021203    | SRPRB    | 281  | 330  | 6.79397844629   |               |
| NM_021203    | SRPRB    | 1518 | 1637 | 9.25341007248   |               |
| NM_021203    | SRPRB    | 340  | 824  | 12.0419059673   |               |
| NM_021203    | SRPRB    | 831  | 1254 | 11.0419059673   |               |
| NM_021203    | SRPRB    | 1286 | 1479 | 9.88144129509   |               |
| NM_021203    | SRPRB    | 1785 | 1971 | 10.3175404099   |               |
| NM_021203    | SRPRB    | 1666 | 1784 | 6.79397844629   |               |
| NM_021204    | ENOPH1   | 349  | 421  | 5.06969254533   |               |
| NM_021204    | ENOPH1   | 620  | 686  | 5.06969254533   |               |
| NM_021204    | ENOPH1   | 827  | 968  | 5.06969254555   |               |
| NM_021205    | RHOU     | 1134 | 1187 | 6.55076111985   |               |
| NM_021205    | RHOU     | 952  | 1020 | 5.5507678509    |               |
| NM_021205    | RHOU     | 1500 | 1654 | 7.87269594579   |               |
| NM_001146158 | MOGS     | 1736 | 1816 | 7.09906932619   |               |
| NM_001146158 | MOGS     | 1862 | 2017 | 10.0990693262   |               |
| NM_001146158 | MOGS     | 1513 | 1720 | 9.09906932619   |               |
| NM_001146158 | MOGS     | 2324 | 2455 | 7.09906932619   |               |
| NM_001146158 | MOGS     | 103  | 238  | 8.09906932619   |               |
| NM_001146158 | MOGS     | 2048 | 2201 | 8.83603492035   |               |
| NM_001146158 | MOGS     | 1155 | 1213 | 7.51410009441   |               |

|              |         |      |      |               |
|--------------|---------|------|------|---------------|
| NM_001146158 | MOGS    | 1254 | 1460 | 9.21454654361 |
| NM_001146158 | MOGS    | 825  | 1143 | 9.76203433891 |
| NM_001146158 | MOGS    | 484  | 598  | 7.83603492035 |
| NM_001146158 | MOGS    | 2222 | 2293 | 6.51410658955 |
| NM_001146158 | MOGS    | 245  | 475  | 9.60156966671 |
| NM_001146158 | MOGS    | 606  | 758  | 8.51410682546 |
| NM_174942    | GAS2L3  | 796  | 841  | 8.63371484386 |
| NM_174942    | GAS2L3  | 297  | 326  | 9.54974938479 |
| NM_001146152 | CYP51A1 | 435  | 514  | 7.6912434562  |
| NM_001146152 | CYP51A1 | 1859 | 1924 | 4.99080373805 |
| NM_001146152 | CYP51A1 | 2836 | 2930 | 7.1607287395  |
| NM_001146152 | CYP51A1 | 1924 | 1993 | 4.99080373805 |
| NM_001146152 | CYP51A1 | 2558 | 2587 | 4.99062998774 |
| NM_001146152 | CYP51A1 | 1762 | 1793 | 3.990797007   |
| NM_001146152 | CYP51A1 | 2608 | 2797 | 8.1607287395  |
| NM_001146152 | CYP51A1 | 2400 | 2507 | 6.31273183294 |
| NM_001146152 | CYP51A1 | 523  | 1594 | 11.6773042652 |
| NM_001146152 | CYP51A1 | 1721 | 1746 | 3.90666452867 |
| NM_001146152 | CYP51A1 | 2003 | 2115 | 7.45023535669 |
| NM_001146152 | CYP51A1 | 1630 | 1711 | 4.99080373805 |
| NM_001146152 | CYP51A1 | 90   | 413  | 9.6912434562  |
| NM_001146152 | CYP51A1 | 2166 | 2358 | 5.99080373805 |
| NM_001114403 | UPK3BL  | 266  | 327  | 10.9207808547 |
| NM_001114403 | UPK3BL  | 22   | 63   | 9.92078085471 |
| NM_001114403 | UPK3BL  | 895  | 957  | 9.92078109063 |
| NM_001114403 | UPK3BL  | 620  | 727  | 10.9207810906 |
| NM_001146156 | GSK3B   | 856  | 918  | 7.66045758649 |
| NM_001146156 | GSK3B   | 533  | 590  | 8.66063133681 |
| NM_001146156 | GSK3B   | 452  | 507  | 6.66063110089 |
| NM_001146156 | GSK3B   | 753  | 797  | 9.24559383731 |
| NM_001146156 | GSK3B   | 2026 | 2153 | 6.66063133681 |
| NM_001146156 | GSK3B   | 376  | 421  | 8.24559382998 |
| NM_001146156 | GSK3B   | 2173 | 2216 | 6.65661373663 |
| NM_001146156 | GSK3B   | 1685 | 1736 | 8.24559382998 |
| NM_001146156 | GSK3B   | 2881 | 2951 | 6.66063110089 |
| NM_001146156 | GSK3B   | 1056 | 1129 | 6.6606313368  |
| NM_001146156 | GSK3B   | 1751 | 1851 | 8.66063133681 |
| NM_001146156 | GSK3B   | 1337 | 1389 | 7.65661373663 |
| NM_001146156 | GSK3B   | 1920 | 1989 | 8.66063133681 |
| NM_001146156 | GSK3B   | 4893 | 5041 | 6.6606313368  |
| NM_001146156 | GSK3B   | 1514 | 1662 | 9.24559383753 |
| NM_001146156 | GSK3B   | 6674 | 6749 | 6.66063133658 |
| NM_001146156 | GSK3B   | 5281 | 5350 | 8.24558710647 |
| NM_032188    | KAT8    | 781  | 820  | 5.57267033662 |
| NM_032188    | KAT8    | 332  | 403  | 5.57267057254 |
| NM_032188    | KAT8    | 219  | 323  | 4.57267057253 |
| NM_014223    | NFYC    | 520  | 602  | 6.47636350373 |
| NM_014223    | NFYC    | 246  | 298  | 6.47653052299 |
| NM_014223    | NFYC    | 448  | 486  | 5.47636350373 |
| NM_001079528 | ABCC6   | 40   | 138  | 6.78855090218 |

|              |           |      |      |                   |
|--------------|-----------|------|------|-------------------|
| NM_001079528 | ABCC6     | 389  | 444  | 4.46661607624     |
| NM_001079528 | ABCC6     | 310  | 384  | 6.4666228073      |
| NM_021064    | HIST1H2AG |      | 174  | 249 11.3933838775 |
| NM_021064    | HIST1H2AG |      | 6    | 99 12.2007387995  |
| NM_021064    | HIST1H2AG |      | 267  | 414 10.3933838775 |
| NM_021066    | HIST1H2AJ |      | 150  | 209 9.57758194052 |
| NM_021067    | GIN51     | 3034 | 3101 | 7.91284911864     |
| NM_021067    | GIN51     | 353  | 422  | 8.32789311305     |
| NM_021067    | GIN51     | 2588 | 2656 | 6.3238757488      |
| NM_021067    | GIN51     | 2362 | 2427 | 6.32789311305     |
| NM_021067    | GIN51     | 1789 | 1869 | 7.32789334896     |
| NM_021061    | ZNF250    | 2588 | 2669 | 10.646639117      |
| NM_001142676 | CHID1     | 429  | 494  | 7.59431624614     |
| NM_001142676 | CHID1     | 1112 | 1158 | 7.59431624614     |
| NM_001142676 | CHID1     | 1492 | 1531 | 6.51018376781     |
| NM_001142676 | CHID1     | 364  | 413  | 7.5943229772      |
| NM_001142676 | CHID1     | 982  | 1029 | 7.17928547792     |
| NM_001142676 | CHID1     | 270  | 320  | 5.59432274128     |
| NM_001142676 | CHID1     | 68   | 197  | 7.5943229772      |
| NM_001142676 | CHID1     | 523  | 826  | 9.5943229772      |
| NM_173060    | CAST      | 415  | 474  | 2.86645182493     |
| NM_173060    | CAST      | 2399 | 2478 | 5.6738069829      |
| NM_173060    | CAST      | 957  | 1004 | 3.86645206085     |
| NM_173060    | CAST      | 733  | 785  | 2.86243446067     |
| NM_173060    | CAST      | 2092 | 2141 | 2.86243446067     |
| NM_173060    | CAST      | 1692 | 1764 | 3.86645206085     |
| NM_173060    | CAST      | 3010 | 3096 | 4.86645206085     |
| NM_173060    | CAST      | 877  | 915  | 2.86243446067     |
| NM_173060    | CAST      | 2665 | 2747 | 2.86645206085     |
| NM_173060    | CAST      | 1777 | 1874 | 5.86645206085     |
| NM_173060    | CAST      | 542  | 657  | 5.6738069829      |
| NM_173060    | CAST      | 2150 | 2190 | 2.86645182493     |
| NM_173060    | CAST      | 2845 | 2927 | 2.86645206085     |
| NM_173060    | CAST      | 2224 | 2389 | 6.45141456157     |
| NM_173060    | CAST      | 1121 | 1406 | 6.6738069829      |
| NM_173060    | CAST      | 795  | 862  | 3.86243446067     |
| NM_173060    | CAST      | 1517 | 1674 | 5.18838015573     |
| NM_173060    | CAST      | 1963 | 2088 | 2.86645206085     |
| NM_001166135 | RBM28     | 1248 | 1297 | 6.60298088606     |
| NM_001166135 | RBM28     | 2076 | 2152 | 5.68310249527     |
| NM_001166135 | RBM28     | 1063 | 1135 | 7.27208259616     |
| NM_003656    | CAMK1     | 618  | 681  | 5.43490835517     |
| NM_003656    | CAMK1     | 837  | 973  | 7.24226327745     |
| NM_001174117 | DMXL2     | 3728 | 3772 | 8.20340728016     |
| NM_001174117 | DMXL2     | 1559 | 1618 | 8.12328567095     |
| NM_001174117 | DMXL2     | 4133 | 4174 | 9.20340728016     |
| NM_001174117 | DMXL2     | 786  | 839  | 8.12328567095     |
| NM_001174117 | DMXL2     | 6745 | 6846 | 9.79238065        |
| NM_002557    | OVGP1     | 1181 | 1230 | 8.3067466606      |
| NM_002556    | OSBP      | 4119 | 4145 | 4.11636831463     |

|           |      |      |      |               |
|-----------|------|------|------|---------------|
| NM_002556 | OSBP | 4859 | 4918 | 5.03624670542 |
| NM_002556 | OSBP | 3360 | 3407 | 5.03624670542 |
| NM_002556 | OSBP | 1965 | 2060 | 5.70534841553 |
| NM_002556 | OSBP | 2450 | 2508 | 4.11636831463 |
| NM_002556 | OSBP | 2761 | 2826 | 5.12037918375 |
| NM_002556 | OSBP | 4294 | 4324 | 4.03624670542 |
| NM_002556 | OSBP | 793  | 848  | 4.12038590726 |
| NM_002556 | OSBP | 3997 | 4077 | 6.70534841553 |
| NM_002556 | OSBP | 1718 | 1794 | 6.44231400969 |
| NM_002556 | OSBP | 3856 | 3922 | 5.11636831463 |
| NM_002556 | OSBP | 3217 | 3263 | 4.11636831463 |
| NM_002556 | OSBP | 1496 | 1569 | 4.12038591481 |
| NM_002556 | OSBP | 2232 | 2305 | 6.12038591481 |
| NM_002556 | OSBP | 2554 | 2727 | 6.44231400969 |
| NM_002556 | OSBP | 1197 | 1277 | 5.12021216449 |
| NM_002556 | OSBP | 2829 | 3024 | 7.29031091625 |
| NM_002556 | OSBP | 1032 | 1160 | 7.12038591481 |
| NM_002556 | OSBP | 3719 | 3784 | 6.12038591459 |
| NM_002556 | OSBP | 1823 | 1956 | 7.12038591481 |
| NM_002227 | JAK1 | 1484 | 1551 | 4.71289319713 |
| NM_002227 | JAK1 | 1778 | 1877 | 5.71289319713 |
| NM_002227 | JAK1 | 1036 | 1130 | 7.52024811919 |
| NM_002227 | JAK1 | 2947 | 3014 | 6.2978556903  |
| NM_002227 | JAK1 | 1190 | 1235 | 5.71271944681 |
| NM_002227 | JAK1 | 4234 | 4325 | 6.29785569785 |
| NM_002227 | JAK1 | 3421 | 3526 | 8.29785569785 |
| NM_002227 | JAK1 | 4343 | 4398 | 4.71271944681 |
| NM_002227 | JAK1 | 1141 | 1185 | 5.71288646608 |
| NM_002227 | JAK1 | 449  | 518  | 4.71289296121 |
| NM_002227 | JAK1 | 2339 | 2399 | 4.71289319691 |
| NM_002227 | JAK1 | 4437 | 4483 | 4.71289319691 |
| NM_002227 | JAK1 | 2217 | 2267 | 5.62875398775 |
| NM_002227 | JAK1 | 1631 | 1707 | 5.71271944681 |
| NM_002227 | JAK1 | 2025 | 2073 | 6.29785569785 |
| NM_002227 | JAK1 | 4496 | 4544 | 4.70887559696 |
| NM_002227 | JAK1 | 3991 | 4086 | 4.70887559696 |
| NM_002227 | JAK1 | 1715 | 1758 | 4.71288646608 |
| NM_002227 | JAK1 | 4842 | 4929 | 7.71289319713 |
| NM_002227 | JAK1 | 3015 | 3258 | 8.03482129202 |
| NM_002227 | JAK1 | 1361 | 1453 | 7.52024811919 |
| NM_002227 | JAK1 | 144  | 253  | 6.29785569785 |
| NM_002227 | JAK1 | 3621 | 3706 | 6.29785569785 |
| NM_002227 | JAK1 | 2475 | 2747 | 8.29785569785 |
| NM_002227 | JAK1 | 261  | 357  | 6.71289319713 |
| NM_000375 | URO5 | 267  | 324  | 7.12432146704 |
| NM_000374 | UROD | 705  | 755  | 6.78715715534 |
| NM_000374 | UROD | 1071 | 1126 | 5.20219464707 |
| NM_000374 | UROD | 467  | 616  | 8.37211965606 |
| NM_000374 | UROD | 1161 | 1240 | 6.78698340503 |
| NM_000374 | UROD | 262  | 373  | 7.52412274951 |

|              |         |      |      |                |
|--------------|---------|------|------|----------------|
| NM_133264    | WIPF2   | 4085 | 4147 | 7.46910858951  |
| NM_133264    | WIPF2   | 4690 | 4738 | 8.38496938035  |
| NM_133264    | WIPF2   | 5037 | 5088 | 8.46509098956  |
| NM_133264    | WIPF2   | 2233 | 2307 | 7.46509098956  |
| NM_133264    | WIPF2   | 4435 | 4481 | 8.38496938035  |
| NM_133264    | WIPF2   | 3641 | 3707 | 7.46509098956  |
| NM_000371    | TTR     | 139  | 187  | 1.39142103996  |
| NM_000371    | TTR     | 363  | 433  | 0.391414316456 |
| NM_000373    | UMPS    | 1440 | 1496 | 3.63010997862  |
| NM_000373    | UMPS    | 387  | 450  | 3.63011670967  |
| NM_000373    | UMPS    | 1565 | 1649 | 5.21507921039  |
| NM_000373    | UMPS    | 1262 | 1327 | 4.63011670945  |
| NM_000373    | UMPS    | 906  | 1008 | 5.95204480456  |
| NM_000373    | UMPS    | 108  | 305  | 6.21507921039  |
| NM_181471    | RFC2    | 960  | 1019 | 5.4346116247   |
| NM_181471    | RFC2    | 797  | 861  | 7.43478536747  |
| NM_181471    | RFC2    | 214  | 264  | 5.4346116247   |
| NM_181471    | RFC2    | 1224 | 1272 | 5.43076777485  |
| NM_181471    | RFC2    | 897  | 944  | 6.4346116247   |
| NM_181471    | RFC2    | 587  | 714  | 5.43478537502  |
| NM_145330    | MRPL33  | 148  | 263  | 2.07877576577  |
| NM_145333    | MAP3K7  | 1082 | 1167 | 7.74445831799  |
| NM_145333    | MAP3K7  | 1040 | 1075 | 6.15948908622  |
| NM_145333    | MAP3K7  | 641  | 705  | 7.15949558136  |
| NM_145333    | MAP3K7  | 2218 | 2266 | 7.1554782171   |
| NM_145333    | MAP3K7  | 2085 | 2157 | 8.48142390461  |
| NM_145333    | MAP3K7  | 1194 | 1238 | 6.15948908622  |
| NM_145333    | MAP3K7  | 2550 | 2620 | 6.15932206696  |
| NM_145333    | MAP3K7  | 504  | 635  | 7.15949581728  |
| NM_182922    | HEATR3  | 555  | 638  | 6.61661824796  |
| NM_001193343 | MRPS18A | 194  | 265  | 5.12720712742  |
| NM_182924    | MICALL2 | 277  | 310  | 9.29338490731  |
| NM_182924    | MICALL2 | 2429 | 2508 | 9.37751738564  |
| NM_003318    | TTK     | 2718 | 2786 | 8.87524901073  |
| NM_003318    | TTK     | 1752 | 1835 | 8.87524228723  |
| NM_003318    | TTK     | 2572 | 2631 | 8.28626891739  |
| NM_003318    | TTK     | 1268 | 1314 | 8.28626891739  |
| NM_003318    | TTK     | 1098 | 1137 | 8.20614730817  |
| NM_006237    | POU4F1  | 3555 | 3605 | 10.5872921737  |
| NM_006237    | POU4F1  | 2400 | 2447 | 10.5071705645  |
| NM_006237    | POU4F1  | 1631 | 1669 | 10.5071705645  |
| NM_006237    | POU4F1  | 3190 | 3260 | 10.5913097663  |
| NM_006234    | POLR2J  | 119  | 175  | 6.60992346006  |
| NM_006234    | POLR2J  | 179  | 228  | 5.60591259094  |
| NM_006234    | POLR2J  | 270  | 334  | 5.60993019111  |
| NM_003315    | DNAJC7  | 969  | 1023 | 4.99274283544  |
| NM_003315    | DNAJC7  | 853  | 965  | 4.99274284299  |
| NM_003315    | DNAJC7  | 1587 | 1651 | 3.67064099779  |
| NM_003315    | DNAJC7  | 753  | 812  | 2.66679714793  |
| NM_003315    | DNAJC7  | 1269 | 1359 | 2.67081474055  |

|           |        |      |      |               |
|-----------|--------|------|------|---------------|
| NM_003315 | DNAJC7 | 1362 | 1495 | 4.99274284299 |
| NM_003315 | DNAJC7 | 1081 | 1181 | 2.66679714793 |
| NM_006232 | POLR2H | 448  | 500  | 5.57500624625 |
| NM_006232 | POLR2H | 904  | 931  | 3.9860261529  |
| NM_006232 | POLR2H | 935  | 994  | 4.98987000276 |
| NM_006232 | POLR2H | 526  | 614  | 6.79739867513 |
| NM_006232 | POLR2H | 1086 | 1128 | 4.90590454369 |
| NM_006232 | POLR2H | 773  | 836  | 5.99004375308 |
| NM_006232 | POLR2H | 624  | 740  | 6.31197184796 |
| NM_003313 | TSTA3  | 339  | 389  | 5.00534511101 |
| NM_006230 | POLD2  | 1118 | 1191 | 8.27243419544 |
| NM_006230 | POLD2  | 693  | 731  | 6.86636689116 |
| NM_006230 | POLD2  | 58   | 132  | 8.27243419544 |
| NM_006230 | POLD2  | 1346 | 1419 | 8.53546860127 |
| NM_006230 | POLD2  | 932  | 1009 | 7.95050610055 |
| NM_006230 | POLD2  | 345  | 408  | 5.94648850038 |
| NM_006230 | POLD2  | 489  | 664  | 10.120431102  |
| NM_006231 | POLE   | 7132 | 7204 | 9.03295247291 |
| NM_006231 | POLE   | 5186 | 5234 | 7.44397260793 |
| NM_006231 | POLE   | 1092 | 1162 | 8.44799020055 |
| NM_006231 | POLE   | 1756 | 1803 | 7.44397260793 |
| NM_006231 | POLE   | 3274 | 3319 | 9.03277895851 |
| NM_006231 | POLE   | 5032 | 5086 | 8.44798997218 |
| NM_006231 | POLE   | 3202 | 3255 | 8.44397260793 |
| NM_006231 | POLE   | 3082 | 3150 | 9.03295270882 |
| NM_006231 | POLE   | 6508 | 6750 | 11.2553451302 |
| NM_006231 | POLE   | 4406 | 4446 | 7.36385099872 |
| NM_006231 | POLE   | 5567 | 5631 | 7.44798347705 |
| NM_006231 | POLE   | 5807 | 5860 | 9.03277895851 |
| NM_006231 | POLE   | 7930 | 8004 | 8.44781645779 |
| NM_006231 | POLE   | 3530 | 3666 | 9.4479902081  |
| NM_006231 | POLE   | 885  | 963  | 7.44781645779 |
| NM_006231 | POLE   | 4477 | 4629 | 9.4479902081  |
| NM_006231 | POLE   | 6054 | 6086 | 7.36385099872 |
| NM_006231 | POLE   | 6755 | 6879 | 9.4479902081  |
| NM_006231 | POLE   | 5902 | 6034 | 10.769918303  |
| NM_006231 | POLE   | 4868 | 4928 | 8.44397260793 |
| NM_006231 | POLE   | 6366 | 6446 | 9.03295270882 |
| NM_006231 | POLE   | 6945 | 7034 | 8.44799020055 |
| NM_004508 | IDI1   | 1497 | 1566 | 5.96586562831 |
| NM_004508 | IDI1   | 1100 | 1155 | 3.63991993325 |
| NM_004508 | IDI1   | 1700 | 1754 | 5.22872628383 |
| NM_004508 | IDI1   | 525  | 573  | 5.6439375332  |
| NM_004508 | IDI1   | 340  | 500  | 6.96586562831 |
| NM_004508 | IDI1   | 1156 | 1242 | 4.6439375332  |
| NM_004508 | IDI1   | 1253 | 1338 | 3.64393753342 |
| NM_004508 | IDI1   | 876  | 931  | 4.63991993325 |
| NM_004508 | IDI1   | 233  | 316  | 5.96586539239 |
| NM_004508 | IDI1   | 682  | 839  | 5.96586562831 |
| NM_004508 | IDI1   | 1911 | 2003 | 4.64393753342 |

|           |         |      |      |               |
|-----------|---------|------|------|---------------|
| NM_153611 | CYBASC3 | 2814 | 2882 | 9.9454317557  |
| NM_153611 | CYBASC3 | 1343 | 1397 | 8.36029550466 |
| NM_153611 | CYBASC3 | 414  | 476  | 9.36046925498 |
| NM_153611 | CYBASC3 | 1119 | 1204 | 10.360469255  |
| NM_153611 | CYBASC3 | 631  | 692  | 10.6823973499 |
| NM_153611 | CYBASC3 | 2272 | 2328 | 9.94542502465 |
| NM_153611 | CYBASC3 | 712  | 779  | 8.36046925498 |
| NM_153611 | CYBASC3 | 1267 | 1330 | 10.3604625239 |
| NM_153611 | CYBASC3 | 2364 | 2416 | 9.36046924743 |
| NM_153611 | CYBASC3 | 2044 | 2142 | 11.360469255  |
| NM_153611 | CYBASC3 | 1641 | 1734 | 10.6823973499 |
| NM_153611 | CYBASC3 | 782  | 859  | 10.360469255  |
| NM_153611 | CYBASC3 | 925  | 1102 | 11.6823973499 |
| NM_153611 | CYBASC3 | 2667 | 2783 | 10.360469255  |
| NM_153611 | CYBASC3 | 2491 | 2665 | 10.360469255  |
| NM_153611 | CYBASC3 | 1735 | 1852 | 10.360469255  |
| NM_004859 | CLTC    | 6124 | 6207 | 7.16274639429 |
| NM_004859 | CLTC    | 6213 | 6302 | 7.32321106648 |
| NM_004859 | CLTC    | 5460 | 5537 | 7.32321106648 |
| NM_004859 | CLTC    | 5342 | 5383 | 4.66024604621 |
| NM_004859 | CLTC    | 5412 | 5460 | 4.07528355304 |
| NM_004859 | CLTC    | 5552 | 5644 | 6.24520855448 |
| NM_004859 | CLTC    | 6310 | 6401 | 6.07528355304 |
| NM_004859 | CLTC    | 2235 | 2827 | 10.075283553  |
| NM_004859 | CLTC    | 5923 | 6035 | 6.07528355304 |
| NM_004859 | CLTC    | 1902 | 2229 | 8.8301710552  |
| NM_004859 | CLTC    | 5669 | 5848 | 7.59884550909 |
| NM_004859 | CLTC    | 3087 | 3345 | 8.53471517167 |
| NM_004859 | CLTC    | 3351 | 3814 | 9.53471517167 |
| NM_004859 | CLTC    | 27   | 75   | 3.99114434365 |
| NM_004859 | CLTC    | 3841 | 4759 | 10.6298724047 |
| NM_004859 | CLTC    | 905  | 1897 | 10.5671366494 |
| NM_004859 | CLTC    | 243  | 362  | 6.88263847509 |
| NM_004859 | CLTC    | 2836 | 3076 | 8.8301710552  |
| NM_004859 | CLTC    | 417  | 901  | 9.28473691866 |
| NM_004859 | CLTC    | 4776 | 5335 | 9.62987240471 |
| NM_153613 | LPCAT4  | 229  | 281  | 6.87532517173 |
| NM_153613 | LPCAT4  | 394  | 446  | 6.87515815247 |
| NM_153613 | LPCAT4  | 1715 | 1774 | 6.87532517173 |
| NM_153613 | LPCAT4  | 461  | 609  | 9.46029440351 |
| NM_153613 | LPCAT4  | 334  | 370  | 6.7911926934  |
| NM_153613 | LPCAT4  | 839  | 906  | 7.7911926934  |
| NM_004855 | PIGB    | 1019 | 1077 | 9.80086809604 |
| NM_004855 | PIGB    | 1334 | 1399 | 9.80104161044 |
| NM_004855 | PIGB    | 569  | 664  | 10.3860043395 |
| NM_004501 | HNRNPU  | 294  | 373  | 2.35217638107 |
| NM_004501 | HNRNPU  | 3461 | 3569 | 3.93713888179 |
| NM_004501 | HNRNPU  | 483  | 525  | 1.35216965002 |
| NM_004501 | HNRNPU  | 3032 | 3150 | 3.35217638107 |
| NM_004501 | HNRNPU  | 222  | 292  | 3.93713888179 |



|           |         |       |       |               |
|-----------|---------|-------|-------|---------------|
| NM_004501 | HNRNPU  | 2987  | 3027  | 2.35200263075 |
| NM_004501 | HNRNPU  | 4293  | 4334  | 2.26803717169 |
| NM_004501 | HNRNPU  | 382   | 435   | 2.93696513148 |
| NM_004501 | HNRNPU  | 2066  | 2230  | 4.93713888179 |
| NM_004501 | HNRNPU  | 602   | 708   | 2.35217638107 |
| NM_004501 | HNRNPU  | 3205  | 3408  | 5.52210138251 |
| NM_004501 | HNRNPU  | 967   | 1719  | 8.09364336747 |
| NM_004501 | HNRNPU  | 2231  | 2611  | 5.87573833713 |
| NM_004501 | HNRNPU  | 14    | 100   | 3.67410447596 |
| NM_004501 | HNRNPU  | 854   | 961   | 2.35217638107 |
| NM_004501 | HNRNPU  | 1755  | 2058  | 5.93713888179 |
| NM_004501 | HNRNPU  | 2614  | 2916  | 5.99603257085 |
| NM_004850 | ROCK2   | 1338  | 1403  | 1.00200949492 |
| NM_004850 | ROCK2   | 568   | 656   | 3.32795518997 |
| NM_004507 | HUS1    | 520   | 573   | 7.68899529843 |
| NM_004507 | HUS1    | 769   | 838   | 6.68497793417 |
| NM_004507 | HUS1    | 309   | 401   | 8.27395803507 |
| NM_004852 | ONECUT2 | 9106  | 9224  | 11.577288777  |
| NM_004852 | ONECUT2 | 2878  | 2948  | 9.57711502664 |
| NM_004852 | ONECUT2 | 13162 | 13213 | 9.57327117678 |
| NM_004852 | ONECUT2 | 11278 | 11323 | 9.5772820459  |
| NM_004852 | ONECUT2 | 5224  | 5338  | 11.577288777  |
| NM_004852 | ONECUT2 | 9249  | 9301  | 9.57327117678 |
| NM_004852 | ONECUT2 | 9692  | 9768  | 9.5772820459  |
| NM_004505 | USP6    | 4210  | 4269  | 10.0351049548 |
| NM_004505 | USP6    | 3875  | 3931  | 9.03509822399 |
| NM_004505 | USP6    | 7728  | 7792  | 9.03510495504 |
| NM_198435 | AURKA   | 133   | 202   | 6.81902332186 |
| NM_198435 | AURKA   | 203   | 264   | 6.49709522698 |
| NM_198435 | AURKA   | 59    | 126   | 5.49692147666 |
| NM_198435 | AURKA   | 1836  | 1877  | 4.49708849592 |
| NM_198435 | AURKA   | 917   | 976   | 4.4930776268  |
| NM_198435 | AURKA   | 696   | 757   | 6.08205772015 |
| NM_198435 | AURKA   | 1398  | 1499  | 6.49709522697 |
| NM_198435 | AURKA   | 1659  | 1739  | 5.49692147666 |
| NM_198435 | AURKA   | 1958  | 2028  | 4.49709499106 |
| NM_198435 | AURKA   | 1065  | 1128  | 4.4930776268  |
| NM_198435 | AURKA   | 1000  | 1044  | 4.4930776268  |
| NM_198435 | AURKA   | 1200  | 1310  | 6.49709522698 |
| NM_144683 | DHRS13  | 1597  | 1659  | 11.2463605237 |
| NM_144683 | DHRS13  | 1475  | 1596  | 12.246534274  |
| NM_144683 | DHRS13  | 779   | 839   | 9.24636052373 |
| NM_144683 | DHRS13  | 365   | 490   | 10.8314967748 |
| NM_144683 | DHRS13  | 632   | 684   | 10.1623950647 |
| NM_144683 | DHRS13  | 271   | 312   | 9.24251667388 |
| NM_144683 | DHRS13  | 497   | 600   | 11.8314967748 |
| NM_144683 | DHRS13  | 1259  | 1426  | 12.246534274  |
| NM_000195 | HPS1    | 412   | 472   | 8.87360393179 |
| NM_000195 | HPS1    | 136   | 263   | 9.87762153196 |
| NM_000195 | HPS1    | 2739  | 2794  | 9.29265902369 |

|           |         |      |       |               |
|-----------|---------|------|-------|---------------|
| NM_000194 | HPRT1   | 278  | 339   | 4.58778941304 |
| NM_144684 | ZNF480  | 3739 | 3877  | 9.16579384118 |
| NM_000196 | HSD11B2 | 54   | 77    | 9.027780755   |
| NM_000196 | HSD11B2 | 741  | 783   | 7.94364827667 |
| NM_000199 | SGSH    | 540  | 595   | 9.19941747254 |
| NM_000199 | SGSH    | 734  | 765   | 10.7843799733 |
| NM_000199 | SGSH    | 1309 | 1368  | 9.11545201347 |
| NM_000199 | SGSH    | 2444 | 2505  | 10.1995912153 |
| NM_000199 | SGSH    | 2292 | 2361  | 10.1995912226 |
| NM_198129 | LAMA3   | 5500 | 5585  | 12.581103848  |
| NM_198129 | LAMA3   | 8310 | 8351  | 12.5809300977 |
| NM_198129 | LAMA3   | 7471 | 7517  | 12.5811036121 |
| NM_198129 | LAMA3   | 8634 | 8694  | 13.1660663487 |
| NM_198129 | LAMA3   | 7052 | 7142  | 13.1620487486 |
| NM_198129 | LAMA3   | 8514 | 8569  | 12.5811036121 |
| NM_198129 | LAMA3   | 6324 | 6390  | 12.5809300977 |
| NM_198129 | LAMA3   | 7700 | 7776  | 12.581097117  |
| NM_198129 | LAMA3   | 9114 | 9191  | 13.581103848  |
| NM_198129 | LAMA3   | 5031 | 5148  | 13.1660663487 |
| NM_198129 | LAMA3   | 7940 | 8014  | 11.5770862478 |
| NM_198129 | LAMA3   | 9943 | 10028 | 11.5811038405 |
| NM_006111 | ACAA2   | 593  | 634   | 3.5280164113  |
| NM_006111 | ACAA2   | 452  | 529   | 6.33554508368 |
| NM_006111 | ACAA2   | 1221 | 1281  | 5.52819016162 |
| NM_006111 | ACAA2   | 534  | 585   | 5.5281899257  |
| NM_006111 | ACAA2   | 998  | 1088  | 4.52819016162 |
| NM_006111 | ACAA2   | 651  | 767   | 6.33554508368 |
| NM_006111 | ACAA2   | 769  | 813   | 4.44405095224 |
| NM_006111 | ACAA2   | 1291 | 1387  | 6.33554508368 |
| NM_006111 | ACAA2   | 1464 | 1556  | 5.85011825651 |
| NM_006111 | ACAA2   | 1597 | 1637  | 4.52417256145 |
| NM_006111 | ACAA2   | 1110 | 1212  | 5.85011825651 |
| NM_020338 | ZMIZ1   | 853  | 893   | 7.14991834785 |
| NM_020338 | ZMIZ1   | 512  | 590   | 7.81902005795 |
| NM_020338 | ZMIZ1   | 741  | 838   | 7.81902005795 |
| NM_020338 | ZMIZ1   | 231  | 294   | 7.8190133269  |
| NM_020338 | ZMIZ1   | 600  | 691   | 7.81902005795 |
| NM_020338 | ZMIZ1   | 2408 | 2443  | 6.14991834785 |
| NM_020338 | ZMIZ1   | 6392 | 6479  | 6.23405082618 |
| NM_020338 | ZMIZ1   | 2569 | 2658  | 7.81902005795 |
| NM_020338 | ZMIZ1   | 4709 | 4861  | 8.55598565212 |
| NM_020338 | ZMIZ1   | 295  | 437   | 7.81902005795 |
| NM_020337 | ANKRD50 | 531  | 597   | 8.7791077713  |
| NM_020337 | ANKRD50 | 2761 | 2863  | 7.85922938051 |
| NM_020336 | RALGAPB | 501  | 595   | 6.22134407365 |
| NM_020336 | RALGAPB | 272  | 312   | 6.80613282406 |
| NM_020336 | RALGAPB | 1958 | 2034  | 6.21732647349 |
| NM_020336 | RALGAPB | 7775 | 7832  | 6.80228897421 |
| NM_020336 | RALGAPB | 2171 | 2310  | 6.80630657438 |
| NM_020336 | RALGAPB | 2838 | 2906  | 6.80629984333 |

|              |        |      |      |                |
|--------------|--------|------|------|----------------|
| NM_000999    | RPL38  | 22   | 250  | 4.58256014803  |
| NM_000999    | RPL38  | 251  | 358  | 2.04650724779  |
| NM_000998    | RPL37A | 33   | 82   | -1.89552854054 |
| NM_000998    | RPL37A | 82   | 387  | 2.27841406108  |
| NM_000990    | RPL27A | 2643 | 2694 | 0.598863104358 |
| NM_000990    | RPL27A | 336  | 417  | 3.18382560508  |
| NM_000990    | RPL27A | 475  | 819  | 6.058294723    |
| NM_144775    | SMCR8  | 2729 | 2785 | 9.08415843059  |
| NM_144775    | SMCR8  | 1748 | 1816 | 9.08800228044  |
| NM_144775    | SMCR8  | 5719 | 5759 | 7.49919592986  |
| NM_144775    | SMCR8  | 1834 | 1886 | 8.49919592986  |
| NM_144775    | SMCR8  | 8171 | 8242 | 8.50321352982  |
| NM_144775    | SMCR8  | 5260 | 5382 | 8.50321353004  |
| NM_000995    | RPL34  | 1    | 147  | 2.81362885939  |
| NM_000995    | RPL34  | 172  | 380  | 3.56851636156  |
| NM_001003407 | ABLIM1 | 4566 | 4620 | 6.65117490387  |
| NM_001003407 | ABLIM1 | 727  | 786  | 6.65117490387  |
| NM_001003407 | ABLIM1 | 5570 | 5651 | 7.6510078846   |
| NM_001003407 | ABLIM1 | 1879 | 1929 | 7.23212653547  |
| NM_001003407 | ABLIM1 | 3575 | 3625 | 5.64716403475  |
| NM_001003407 | ABLIM1 | 6425 | 6503 | 7.65118163491  |
| NM_001003407 | ABLIM1 | 2762 | 2817 | 5.65118162737  |
| NM_001003407 | ABLIM1 | 2294 | 2349 | 5.64716403475  |
| NM_001003407 | ABLIM1 | 3385 | 3452 | 7.23614412809  |
| NM_001003407 | ABLIM1 | 2520 | 2566 | 6.6510078846   |
| NM_001003407 | ABLIM1 | 4139 | 4262 | 6.65118163492  |
| NM_001003407 | ABLIM1 | 6348 | 6425 | 7.97310972981  |
| NM_001003407 | ABLIM1 | 1290 | 1357 | 7.97310972226  |
| NM_001003407 | ABLIM1 | 1092 | 1159 | 5.56704242554  |
| NM_001003407 | ABLIM1 | 7345 | 7418 | 5.65118162737  |
| NM_001003407 | ABLIM1 | 2025 | 2096 | 5.64716403475  |
| NM_000997    | RPL37  | 379  | 436  | 0.991292919294 |
| NM_000997    | RPL37  | 36   | 374  | 3.99129291952  |
| NM_000996    | RPL35A | 19   | 153  | 4.46761318582  |
| NM_000996    | RPL35A | 343  | 476  | 4.46761318582  |
| NM_000996    | RPL35A | 157  | 323  | 4.07529576304  |
| NM_004301    | ACTL6A | 528  | 605  | 6.71839315892  |
| NM_004301    | ACTL6A | 1492 | 1569 | 7.71839315892  |
| NM_004301    | ACTL6A | 975  | 1038 | 6.13343042228  |
| NM_004301    | ACTL6A | 640  | 691  | 7.71839315892  |
| NM_004301    | ACTL6A | 746  | 827  | 7.45535875309  |
| NM_004301    | ACTL6A | 1182 | 1234 | 6.12941305803  |
| NM_004301    | ACTL6A | 11   | 40   | 5.04929144882  |
| NM_004301    | ACTL6A | 1051 | 1158 | 5.1334306582   |
| NM_004301    | ACTL6A | 1294 | 1365 | 6.12941305803  |
| NM_004301    | ACTL6A | 374  | 484  | 7.71839315892  |
| NM_004301    | ACTL6A | 197  | 325  | 7.1334306582   |
| NM_004301    | ACTL6A | 833  | 969  | 8.1334306582   |
| NM_004301    | ACTL6A | 1705 | 1789 | 6.1334306582   |
| NM_004301    | ACTL6A | 1386 | 1477 | 7.1334306582   |

|           |         |      |      |               |
|-----------|---------|------|------|---------------|
| NM_153042 | KDM1B   | 355  | 412  | 8.01320994105 |
| NM_153042 | KDM1B   | 1055 | 1124 | 8.6823049201  |
| NM_153042 | KDM1B   | 547  | 597  | 7.01320994105 |
| NM_175932 | PSMD13  | 1376 | 1437 | 4.02617382321 |
| NM_175932 | PSMD13  | 1616 | 1723 | 5.61131007425 |
| NM_175932 | PSMD13  | 1061 | 1136 | 6.02634084248 |
| NM_175932 | PSMD13  | 1460 | 1519 | 6.02634757353 |
| NM_175932 | PSMD13  | 675  | 748  | 6.02634757353 |
| NM_175932 | PSMD13  | 968  | 1025 | 6.02634733761 |
| NM_175932 | PSMD13  | 293  | 338  | 3.94220836415 |
| NM_175932 | PSMD13  | 1150 | 1202 | 6.02634756598 |
| NM_175932 | PSMD13  | 211  | 287  | 5.02634084248 |
| NM_175932 | PSMD13  | 1234 | 1334 | 6.02634757353 |
| NM_175932 | PSMD13  | 484  | 629  | 7.72678729167 |
| NM_175932 | PSMD13  | 749  | 963  | 7.48577919217 |
| NM_002040 | GABPA   | 2591 | 2640 | 6.2064317089  |
| NM_002040 | GABPA   | 2507 | 2584 | 6.21027555875 |
| NM_002040 | GABPA   | 2331 | 2385 | 6.2064317089  |
| NM_002040 | GABPA   | 582  | 673  | 7.79139420962 |
| NM_002040 | GABPA   | 1690 | 1718 | 7.2064317089  |
| NM_002040 | GABPA   | 3667 | 3724 | 6.2064317089  |
| NM_002040 | GABPA   | 2027 | 2074 | 7.21027555875 |
| NM_002040 | GABPA   | 1062 | 1140 | 6.2064317089  |
| NM_002047 | GARS    | 1236 | 1304 | 5.22524670694 |
| NM_002047 | GARS    | 2524 | 2609 | 4.9622123011  |
| NM_002047 | GARS    | 1932 | 1994 | 3.64028420621 |
| NM_002047 | GARS    | 2657 | 2748 | 5.81020920766 |
| NM_002047 | GARS    | 339  | 404  | 2.63626660604 |
| NM_002047 | GARS    | 1648 | 1696 | 4.64028420621 |
| NM_002047 | GARS    | 1495 | 1615 | 5.22524670694 |
| NM_002047 | GARS    | 1696 | 1919 | 6.81020920766 |
| NM_002047 | GARS    | 419  | 555  | 2.64028419866 |
| NM_002047 | GARS    | 574  | 773  | 5.44763912827 |
| NM_002047 | GARS    | 2009 | 2488 | 7.72774704746 |
| NM_002047 | GARS    | 1325 | 1492 | 5.81020920766 |
| NM_002047 | GARS    | 774  | 1166 | 7.28414039599 |
| NM_002046 | GAPDH   | 89   | 1398 | 7.36022128258 |
| NM_013265 | C11orf2 | 2068 | 2120 | 5.76253671366 |
| NM_013265 | C11orf2 | 880  | 926  | 4.75852584454 |
| NM_013265 | C11orf2 | 1912 | 1975 | 6.34750593789 |
| NM_013265 | C11orf2 | 518  | 593  | 6.76254344471 |
| NM_013265 | C11orf2 | 1730 | 1798 | 4.76254343716 |
| NM_013265 | C11orf2 | 1557 | 1628 | 5.76254344471 |
| NM_013265 | C11orf2 | 292  | 487  | 8.0844715396  |
| NM_013265 | C11orf2 | 2349 | 2446 | 6.76254320879 |
| NM_013265 | C11orf2 | 960  | 1051 | 4.76254344471 |
| NM_013265 | C11orf2 | 2121 | 2283 | 7.56989836677 |
| NM_013263 | BRD7    | 1118 | 1177 | 2.49572103081 |
| NM_013263 | BRD7    | 2029 | 2125 | 3.49973863099 |
| NM_013263 | BRD7    | 1416 | 1478 | 3.49973189993 |

|              |          |      |      |                    |
|--------------|----------|------|------|--------------------|
| NM_013263    | BRD7     | 606  | 709  | 4.49973863099      |
| NM_013261    | PPARGC1A |      | 2843 | 2863 6.87151335039 |
| NM_013260    | SAP30BP  | 90   | 198  | 3.93015719889      |
| NM_001047160 | NET1     | 1294 | 1389 | 7.03844953638      |
| NM_001047160 | NET1     | 661  | 705  | 5.63238223211      |
| NM_001047160 | NET1     | 587  | 648  | 5.71634769118      |
| NM_001047160 | NET1     | 2248 | 2319 | 4.71652120558      |
| NM_001047160 | NET1     | 1470 | 1526 | 4.63238223211      |
| NM_001047160 | NET1     | 1233 | 1276 | 6.30147721116      |
| NM_001047160 | NET1     | 2862 | 2949 | 4.71651471044      |
| NM_001047160 | NET1     | 2473 | 2521 | 5.63238223211      |
| NM_001047160 | NET1     | 447  | 501  | 6.71652120558      |
| NM_001047160 | NET1     | 707  | 911  | 8.17595306013      |
| NM_001047160 | NET1     | 319  | 404  | 4.71652120558      |
| NM_002265    | KPNB1    | 1093 | 1147 | 3.67660991775      |
| NM_002265    | KPNB1    | 121  | 184  | 2.67660991775      |
| NM_002265    | KPNB1    | 1147 | 1200 | 4.26157241847      |
| NM_002265    | KPNB1    | 3226 | 3305 | 4.84653491919      |
| NM_002265    | KPNB1    | 655  | 815  | 5.67660991775      |
| NM_002265    | KPNB1    | 3672 | 3719 | 1.67660991775      |
| NM_002265    | KPNB1    | 394  | 541  | 5.37704963589      |
| NM_002265    | KPNB1    | 4047 | 4113 | 1.67643616743      |
| NM_002265    | KPNB1    | 543  | 626  | 4.84653491919      |
| NM_002265    | KPNB1    | 1204 | 1458 | 6.58350051336      |
| NM_002265    | KPNB1    | 3934 | 4040 | 1.67660991775      |
| NM_002265    | KPNB1    | 226  | 293  | 1.67660991775      |
| NM_002265    | KPNB1    | 1494 | 1624 | 4.67660991775      |
| NM_002265    | KPNB1    | 3759 | 3872 | 3.26157241847      |
| NM_002265    | KPNB1    | 3384 | 3621 | 5.26157241847      |
| NM_002265    | KPNB1    | 2276 | 3175 | 8.39085543542      |
| NM_002265    | KPNB1    | 828  | 1076 | 5.92453743119      |
| NM_002265    | KPNB1    | 1626 | 2275 | 8.37704963589      |
| NM_002264    | KPNA1    | 1517 | 1560 | 5.82216894092      |
| NM_002264    | KPNA1    | 3292 | 3348 | 6.82217567175      |
| NM_002264    | KPNA1    | 1668 | 1736 | 7.40713817269      |
| NM_002264    | KPNA1    | 3022 | 3075 | 5.8181580718       |
| NM_002264    | KPNA1    | 1911 | 1992 | 7.40713816514      |
| NM_002264    | KPNA1    | 853  | 932  | 5.82217566442      |
| NM_002264    | KPNA1    | 3363 | 3421 | 6.82200192165      |
| NM_002264    | KPNA1    | 2545 | 2631 | 8.62953059403      |
| NM_002264    | KPNA1    | 771  | 824  | 7.40713817247      |
| NM_002264    | KPNA1    | 2429 | 2529 | 8.14410376686      |
| NM_002264    | KPNA1    | 1560 | 1651 | 7.82217567197      |
| NM_002264    | KPNA1    | 1047 | 1233 | 9.72906626758      |
| NM_002264    | KPNA1    | 1253 | 1514 | 9.62953059403      |
| NM_002264    | KPNA1    | 516  | 646  | 6.82217567197      |
| NM_002264    | KPNA1    | 2779 | 2899 | 6.82217567175      |
| NM_002264    | KPNA1    | 938  | 1023 | 8.14410376686      |
| NM_002266    | KPNA2    | 3    | 63   | 5.95096157679      |
| NM_002266    | KPNA2    | 462  | 1947 | 11.3201953865      |

|              |           |       |       |               |               |
|--------------|-----------|-------|-------|---------------|---------------|
| NM_002266    | KPNA2     | 97    | 413   | 7.8254306947  |               |
| NM_002263    | KIFC1     | 1021  | 1105  | 7.94805660919 |               |
| NM_002263    | KIFC1     | 2232  | 2370  | 8.43348343636 |               |
| NM_002263    | KIFC1     | 2424  | 2507  | 7.6261285143  |               |
| NM_002263    | KIFC1     | 1945  | 1978  | 8.2109172647  |               |
| NM_002263    | KIFC1     | 1763  | 1886  | 8.43348343636 |               |
| NM_002263    | KIFC1     | 863   | 999   | 8.43348343636 |               |
| NM_002263    | KIFC1     | 2106  | 2176  | 5.62612851408 |               |
| NM_002263    | KIFC1     | 665   | 801   | 6.6261285143  |               |
| NM_002263    | KIFC1     | 1435  | 1656  | 8.21109101502 |               |
| NM_002263    | KIFC1     | 374   | 536   | 8.43348343636 |               |
| NM_031361    | COL4A3BP  |       | 1173  | 1256          | 5.54960415818 |
| NM_031361    | COL4A3BP  |       | 685   | 737           | 5.55361502729 |
| NM_031361    | COL4A3BP  |       | 2769  | 2841          | 5.46948254896 |
| NM_031361    | COL4A3BP  |       | 1891  | 1962          | 6.13858425907 |
| NM_031361    | COL4A3BP  |       | 471   | 553           | 4.54960415818 |
| NM_002268    | KPNA4     | 2990  | 3046  | 3.74563546454 |               |
| NM_002268    | KPNA4     | 2137  | 2222  | 4.74965306471 |               |
| NM_002268    | KPNA4     | 444   | 519   | 6.33461556543 |               |
| NM_002268    | KPNA4     | 1725  | 1798  | 5.33461532951 |               |
| NM_002268    | KPNA4     | 832   | 926   | 5.74965306471 |               |
| NM_002268    | KPNA4     | 605   | 663   | 5.74964633365 |               |
| NM_002268    | KPNA4     | 2342  | 2377  | 5.74563546454 |               |
| NM_002268    | KPNA4     | 7378  | 7490  | 3.74965282879 |               |
| NM_002268    | KPNA4     | 1535  | 1643  | 5.74965306471 |               |
| NM_002268    | KPNA4     | 304   | 388   | 5.74965306471 |               |
| NM_002268    | KPNA4     | 1424  | 1520  | 5.74965306471 |               |
| NM_002268    | KPNA4     | 3583  | 3676  | 3.74965305716 |               |
| NM_002268    | KPNA4     | 1065  | 1362  | 8.33461556543 |               |
| NM_002268    | KPNA4     | 2424  | 2482  | 3.74965306471 |               |
| NM_002268    | KPNA4     | 1867  | 1913  | 3.74964633365 |               |
| NM_002268    | KPNA4     | 688   | 831   | 6.74965306471 |               |
| NM_015365    | AMMECR1   | 736   | 790   | 11.398726677  |               |
| NM_001190991 | CNPY2     | 699   | 837   | 8.36136636043 |               |
| NM_001190991 | CNPY2     | 388   | 436   | 6.36136635288 |               |
| NM_001190991 | CNPY2     | 545   | 670   | 7.94632886115 |               |
| NM_001163524 | ITPRIPL1  |       | 1247  | 1318          | 7.97535724006 |
| NM_001163524 | ITPRIPL1  |       | 179   | 269           | 7.97535724006 |
| NM_001160408 | TULP3     | 1268  | 1342  | 9.24093865028 |               |
| NM_001024599 | HIST2H2BF |       | 296   | 353           | 7.50035898479 |
| NM_001024599 | HIST2H2BF |       | 3     | 148           | 10.6704577366 |
| NM_001024599 | HIST2H2BF |       | 151   | 294           | 10.82246083   |
| NM_006726    | LRBA      | 5994  | 6113  | 8.03478616478 |               |
| NM_006726    | LRBA      | 6609  | 6694  | 6.44580606389 |               |
| NM_006726    | LRBA      | 1974  | 2091  | 8.44982366406 |               |
| NM_033141    | MAP3K9    | 2571  | 2628  | 8.5423249878  |               |
| NM_033141    | MAP3K9    | 6454  | 6528  | 9.46220337859 |               |
| NM_033141    | MAP3K9    | 10499 | 10561 | 8.54616883765 |               |
| NM_001025234 | TSPAN4    | 519   | 581   | 7.19210048271 |               |
| NM_001025234 | TSPAN4    | 639   | 701   | 8.19210048249 |               |

|              |          |      |      |                |               |
|--------------|----------|------|------|----------------|---------------|
| NM_001025234 | TSPAN4   | 789  | 894  | 10.1921004827  |               |
| NM_001025234 | TSPAN4   | 347  | 460  | 9.99945540477  |               |
| NM_001025234 | TSPAN4   | 153  | 323  | 9.77706298343  |               |
| NM_080678    | UBE2F    | 565  | 617  | 7.01268227971  |               |
| NM_080678    | UBE2F    | 638  | 741  | 6.42771977921  |               |
| NM_080677    | DYNLL2   | 1341 | 1432 | 6.29432024083  |               |
| NM_080677    | DYNLL2   | 1195 | 1252 | 3.97239214595  |               |
| NM_080677    | DYNLL2   | 1456 | 1521 | 3.97238541489  |               |
| NM_080677    | DYNLL2   | 325  | 435  | 4.97239214595  |               |
| NM_080677    | DYNLL2   | 190  | 238  | 3.96837454577  |               |
| NM_080677    | DYNLL2   | 760  | 829  | 4.97239214595  |               |
| NM_080677    | DYNLL2   | 628  | 701  | 5.9723921384   |               |
| NM_080677    | DYNLL2   | 1252 | 1337 | 3.97239214572  |               |
| NM_018279    | TMEM19   | 710  | 791  | 11.3307199589  |               |
| NM_018279    | TMEM19   | 1299 | 1346 | 7.87128160918  |               |
| NM_018279    | TMEM19   | 65   | 139  | 7.86727074006  |               |
| NM_018279    | TMEM19   | 1516 | 1557 | 9.87128833269  |               |
| NM_018279    | TMEM19   | 622  | 706  | 10.1932164351  |               |
| NM_018279    | TMEM19   | 793  | 849  | 8.87128833269  |               |
| NM_018279    | TMEM19   | 889  | 1053 | 11.1932164351  |               |
| NM_018279    | TMEM19   | 1354 | 1455 | 10.8712883402  |               |
| NM_018279    | TMEM19   | 1061 | 1207 | 11.6786432623  |               |
| NM_018279    | TMEM19   | 419  | 562  | 11.3307199589  |               |
| NM_015318    | ARHGEF18 |      | 1085 | 1196           | 8.66254865748 |
| NM_015318    | ARHGEF18 |      | 2110 | 2179           | 8.66254192643 |
| NM_015318    | ARHGEF18 |      | 1749 | 1833           | 9.98447675237 |
| NM_015318    | ARHGEF18 |      | 4685 | 4784           | 7.66254865749 |
| NM_015318    | ARHGEF18 |      | 512  | 537            | 7.65853105731 |
| NM_015318    | ARHGEF18 |      | 5018 | 5105           | 8.66254865749 |
| NM_015318    | ARHGEF18 |      | 3387 | 3430           | 7.66237490717 |
| NM_015318    | ARHGEF18 |      | 801  | 837            | 8.5784094481  |
| NM_015318    | ARHGEF18 |      | 1601 | 1662           | 9.66237490717 |
| NM_015318    | ARHGEF18 |      | 266  | 330            | 8.66237490717 |
| NM_015318    | ARHGEF18 |      | 4340 | 4388           | 7.66254192643 |
| NM_015318    | ARHGEF18 |      | 5139 | 5214           | 8.66254864994 |
| NM_015318    | ARHGEF18 |      | 1464 | 1552           | 7.66254865726 |
| NM_015318    | ARHGEF18 |      | 1326 | 1405           | 8.66254865726 |
| NM_015318    | ARHGEF18 |      | 646  | 706            | 7.5784094481  |
| NM_015318    | ARHGEF18 |      | 1254 | 1317           | 7.66237490717 |
| NM_001145408 | NONO     | 482  | 580  | 0.935556660026 |               |
| NM_001145408 | NONO     | 1059 | 1126 | 1.93555642411  |               |
| NM_001145408 | NONO     | 2213 | 2286 | 2.93555666003  |               |
| NM_001145408 | NONO     | 1946 | 2206 | 5.74291158208  |               |
| NM_001145408 | NONO     | 2286 | 2458 | 4.74291158208  |               |
| NM_001145408 | NONO     | 2756 | 2867 | 3.25748475491  |               |
| NM_001145408 | NONO     | 2477 | 2646 | 3.52051916075  |               |
| NM_001145408 | NONO     | 1182 | 1894 | 6.42740975636  |               |
| NM_001145408 | NONO     | 857  | 1058 | 4.10548166147  |               |
| NM_001145408 | NONO     | 2869 | 3189 | 5.69044416219  |               |
| NM_015315    | LARP1    | 5113 | 5197 | 5.97295050172  |               |

|           |       |      |      |               |
|-----------|-------|------|------|---------------|
| NM_015315 | LARP1 | 3040 | 3111 | 3.97295050171 |
| NM_015315 | LARP1 | 5214 | 5268 | 4.97295050172 |
| NM_015315 | LARP1 | 4446 | 4515 | 5.97295050172 |
| NM_015315 | LARP1 | 4575 | 4636 | 5.97295050171 |
| NM_015315 | LARP1 | 5459 | 5510 | 3.97295050172 |
| NM_015315 | LARP1 | 2095 | 2187 | 3.97295050172 |
| NM_015315 | LARP1 | 3376 | 3434 | 6.29487859661 |
| NM_015315 | LARP1 | 2809 | 2889 | 6.55791300244 |
| NM_015315 | LARP1 | 2192 | 2255 | 5.97295050172 |
| NM_015315 | LARP1 | 5353 | 5425 | 3.97295049417 |
| NM_015315 | LARP1 | 3981 | 4049 | 6.78030542378 |
| NM_015315 | LARP1 | 4060 | 4155 | 7.29487859661 |
| NM_015315 | LARP1 | 5963 | 6020 | 3.88881129234 |
| NM_015315 | LARP1 | 4186 | 4306 | 7.87984109733 |
| NM_015315 | LARP1 | 286  | 313  | 4.9727767514  |
| NM_015315 | LARP1 | 467  | 535  | 3.97295050172 |
| NM_015315 | LARP1 | 379  | 452  | 3.97295050172 |
| NM_015315 | LARP1 | 4700 | 4910 | 7.14287550316 |
| NM_015315 | LARP1 | 4341 | 4415 | 4.97295050172 |
| NM_015315 | LARP1 | 3541 | 3581 | 3.88881129234 |
| NM_015315 | LARP1 | 2021 | 2089 | 4.9729505015  |
| NM_015315 | LARP1 | 6229 | 6360 | 6.55791300244 |
| NM_015315 | LARP1 | 5517 | 5656 | 7.14287550316 |
| NM_015315 | LARP1 | 2575 | 2792 | 7.43238212036 |
| NM_015315 | LARP1 | 609  | 711  | 6.55791300244 |
| NM_015315 | LARP1 | 3155 | 3224 | 4.9729505015  |
| NM_015315 | LARP1 | 1242 | 1362 | 7.29487859661 |
| NM_015315 | LARP1 | 1831 | 1993 | 6.97295050172 |
| NM_015315 | LARP1 | 4911 | 5031 | 6.78030542378 |
| NM_015315 | LARP1 | 5679 | 5809 | 3.97295050172 |
| NM_015315 | LARP1 | 2406 | 2510 | 6.29487859661 |
| NM_015315 | LARP1 | 1124 | 1232 | 5.97295050172 |
| NM_015315 | LARP1 | 1523 | 1715 | 8.14287550316 |
| NM_015315 | LARP1 | 3682 | 3848 | 6.29487859661 |
| NM_015315 | LARP1 | 6046 | 6185 | 5.97295050172 |
| NM_015315 | LARP1 | 6380 | 6549 | 4.97295050172 |
| NM_015315 | LARP1 | 3225 | 3317 | 5.97295050172 |
| NM_015315 | LARP1 | 1369 | 1506 | 6.55791300244 |
| NM_015315 | LARP1 | 800  | 1103 | 8.22087801516 |
| NM_015317 | PUM2  | 3190 | 3228 | 3.99458173135 |
| NM_015317 | PUM2  | 5545 | 5610 | 3.99458173135 |
| NM_015317 | PUM2  | 588  | 657  | 5.9985993313  |
| NM_015317 | PUM2  | 5929 | 6004 | 3.91446012214 |
| NM_015317 | PUM2  | 4815 | 4889 | 3.99859933152 |
| NM_015317 | PUM2  | 1208 | 1260 | 5.99859932397 |
| NM_015317 | PUM2  | 1047 | 1115 | 4.99458173135 |
| NM_015317 | PUM2  | 848  | 900  | 4.99842558121 |
| NM_015317 | PUM2  | 2508 | 2571 | 3.99859932397 |
| NM_015317 | PUM2  | 916  | 967  | 3.99842558121 |
| NM_015317 | PUM2  | 1881 | 1990 | 5.99859933152 |



|              |            |      |      |               |               |
|--------------|------------|------|------|---------------|---------------|
| NM_015317    | PUM2       | 5017 | 5076 | 5.5835618247  |               |
| NM_015317    | PUM2       | 4892 | 4940 | 3.99458173135 |               |
| NM_015317    | PUM2       | 2195 | 2274 | 5.99458173135 |               |
| NM_015317    | PUM2       | 2933 | 3075 | 4.99859933152 |               |
| NM_015317    | PUM2       | 4023 | 4101 | 4.99859933152 |               |
| NM_015317    | PUM2       | 285  | 413  | 4.99859260047 |               |
| NM_015317    | PUM2       | 3410 | 3492 | 3.99859909561 |               |
| NM_015317    | PUM2       | 973  | 1040 | 4.99859933152 |               |
| NM_015317    | PUM2       | 3286 | 3387 | 5.58356183224 |               |
| NM_015310    | PSD3       | 537  | 614  | 10.5090753194 |               |
| NM_015310    | PSD3       | 1409 | 1463 | 7.92410608762 |               |
| NM_015310    | PSD3       | 4427 | 4483 | 8.92393906836 |               |
| NM_015310    | PSD3       | 7813 | 7866 | 7.92411281113 |               |
| NM_015310    | PSD3       | 9068 | 9109 | 7.83997360929 |               |
| NM_015310    | PSD3       | 4488 | 4532 | 7.9200952185  |               |
| NM_015310    | PSD3       | 3367 | 3454 | 8.92411281113 |               |
| NM_015310    | PSD3       | 4326 | 4409 | 7.92411258276 |               |
| NM_018273    | TMEM143    | 870  | 911  | 11.5259912696 |               |
| NM_001145432 | C4orf52    | 463  | 534  | 6.80772413485 |               |
| NM_001145432 | C4orf52    | 400  | 451  | 5.80772413485 |               |
| NM_001145432 | C4orf52    | 598  | 662  | 7.81174173502 |               |
| NM_001145432 | C4orf52    | 223  | 395  | 8.61909665708 |               |
| NM_002617    | PEX10      | 178  | 246  | 11.4522775665 |               |
| NM_001204425 | BIVM-ERCC5 |      | 143  | 202           | 6.26468357362 |
| NM_001204425 | BIVM-ERCC5 |      | 2186 | 2231          | 6.34480518283 |
| NM_001204425 | BIVM-ERCC5 |      | 3045 | 3083          | 7.34480518283 |
| NM_001204425 | BIVM-ERCC5 |      | 2759 | 2812          | 6.26468357362 |
| NM_001204425 | BIVM-ERCC5 |      | 4181 | 4255          | 6.26468357362 |
| NM_001204425 | BIVM-ERCC5 |      | 3681 | 3733          | 6.34864903268 |
| NM_001204425 | BIVM-ERCC5 |      | 1616 | 1708          | 6.34881605195 |
| NM_012339    | TSPAN15    | 414  | 458  | 9.41204805545 |               |
| NM_012339    | TSPAN15    | 1023 | 1082 | 8.49618702892 |               |
| NM_012339    | TSPAN15    | 314  | 406  | 10.0811497656 |               |
| NM_012339    | TSPAN15    | 1318 | 1390 | 9.49618726483 |               |
| NM_012339    | TSPAN15    | 1201 | 1258 | 10.0811495296 |               |
| NM_012339    | TSPAN15    | 461  | 572  | 12.4961872648 |               |
| NM_012339    | TSPAN15    | 875  | 961  | 9.49618726484 |               |
| NM_012339    | TSPAN15    | 113  | 294  | 12.196626983  |               |
| NM_012339    | TSPAN15    | 575  | 815  | 12.0811497656 |               |
| NM_001115016 | KIAA1310   |      | 1578 | 1617          | 6.05958858905 |
| NM_001115016 | KIAA1310   |      | 4112 | 4166          | 6.05958858905 |
| NM_001115016 | KIAA1310   |      | 648  | 746           | 6.05942156978 |
| NM_001115016 | KIAA1310   |      | 1834 | 1871          | 6.05557771993 |
| NM_001115016 | KIAA1310   |      | 221  | 286           | 7.64455108977 |
| NM_001115016 | KIAA1310   |      | 1490 | 1578          | 8.38152341499 |
| NM_001115016 | KIAA1310   |      | 4942 | 5071          | 7.0595953201  |
| NM_001115016 | KIAA1310   |      | 3335 | 3467          | 8.0595953201  |
| NM_001115016 | KIAA1310   |      | 3040 | 3114          | 7.6443840705  |
| NM_001115016 | KIAA1310   |      | 944  | 1004          | 6.05958858905 |
| NM_012333    | MYCBP      | 97   | 157  | 7.05944456755 |               |

|           |         |      |      |               |
|-----------|---------|------|------|---------------|
| NM_014408 | TRAPPC3 | 731  | 781  | 3.96358264912 |
| NM_014408 | TRAPPC3 | 461  | 502  | 5.54837139952 |
| NM_014408 | TRAPPC3 | 979  | 1079 | 5.54853841878 |
| NM_014408 | TRAPPC3 | 548  | 712  | 6.54854514984 |
| NM_014408 | TRAPPC3 | 139  | 370  | 6.96358264912 |
| NM_014409 | TAF5L   | 2472 | 2513 | 8.42587124211 |
| NM_014409 | TAF5L   | 353  | 427  | 10.0146775927 |
| NM_014409 | TAF5L   | 1401 | 1445 | 9.34574963289 |
| NM_014409 | TAF5L   | 1218 | 1360 | 10.4298888423 |
| NM_014402 | UQCRQ   | 71   | 120  | 5.58231066714 |
| NM_014402 | UQCRQ   | 208  | 406  | 6.9608222904  |
| NM_014957 | DENND3  | 3785 | 3813 | 10.0546246883 |
| NM_015346 | ZFYVE26 | 5215 | 5264 | 9.05329981246 |
| NM_015346 | ZFYVE26 | 5570 | 5615 | 8.9693343534  |
| NM_015346 | ZFYVE26 | 4753 | 4805 | 8.04945596261 |
| NM_014952 | BAHD1   | 1836 | 1894 | 10.6696363879 |
| NM_014952 | BAHD1   | 3837 | 3893 | 9.08450037278 |
| NM_014952 | BAHD1   | 2950 | 2998 | 10.0846741156 |
| NM_014952 | BAHD1   | 2134 | 2185 | 11.0846741156 |
| NM_014952 | BAHD1   | 4250 | 4332 | 10.6696366238 |
| NM_014952 | BAHD1   | 3907 | 3965 | 10.0845003728 |
| NM_014952 | BAHD1   | 4050 | 4139 | 9.08467388718 |
| NM_005067 | SIAH2   | 2202 | 2280 | 5.35902657295 |
| NM_005067 | SIAH2   | 1249 | 1292 | 6.35902657295 |
| NM_005067 | SIAH2   | 1773 | 1826 | 7.36303744207 |
| NM_005065 | SEL1L   | 657  | 713  | 5.18534409255 |
| NM_005065 | SEL1L   | 290  | 354  | 6.18534432092 |
| NM_005065 | SEL1L   | 5066 | 5140 | 6.50727242335 |
| NM_005065 | SEL1L   | 2880 | 2979 | 6.50727242335 |
| NM_005065 | SEL1L   | 2726 | 2821 | 6.50727242313 |
| NM_005065 | SEL1L   | 1899 | 2170 | 9.43327184191 |
| NM_005065 | SEL1L   | 1820 | 1884 | 6.18534432847 |
| NM_005065 | SEL1L   | 1722 | 1816 | 7.50727242335 |
| NM_005065 | SEL1L   | 6096 | 6160 | 4.18132672829 |
| NM_005065 | SEL1L   | 1220 | 1316 | 6.50727242335 |
| NM_005065 | SEL1L   | 394  | 476  | 5.77030682919 |
| NM_005065 | SEL1L   | 1105 | 1196 | 6.99269925052 |
| NM_005065 | SEL1L   | 2181 | 2409 | 8.27280716972 |
| NM_005065 | SEL1L   | 4646 | 4724 | 5.77030682918 |
| NM_005065 | SEL1L   | 2990 | 3050 | 4.18534432092 |
| NM_005065 | SEL1L   | 4747 | 4837 | 6.18534432847 |
| NM_005065 | SEL1L   | 3823 | 3911 | 6.18534432847 |
| NM_005065 | SEL1L   | 3507 | 3614 | 5.77030682919 |
| NM_005065 | SEL1L   | 535  | 649  | 7.18534432847 |
| NM_005065 | SEL1L   | 6015 | 6094 | 4.18534432824 |
| NM_005065 | SEL1L   | 3287 | 3400 | 5.77030682919 |
| NM_005065 | SEL1L   | 128  | 286  | 7.88578404661 |
| NM_005065 | SEL1L   | 6336 | 6473 | 5.77030682919 |
| NM_005065 | SEL1L   | 1349 | 1585 | 8.27280716972 |
| NM_005065 | SEL1L   | 4011 | 4081 | 5.18533759741 |

|           |        |      |      |               |
|-----------|--------|------|------|---------------|
| NM_005065 | SEL1L  | 827  | 1096 | 8.77030682919 |
| NM_005065 | SEL1L  | 2502 | 2708 | 8.18534432847 |
| NM_005065 | SEL1L  | 5440 | 5560 | 6.18534432847 |
| NM_005065 | SEL1L  | 3682 | 3772 | 5.18534432847 |
| NM_005065 | SEL1L  | 3104 | 3248 | 6.50727242335 |
| NM_005065 | SEL1L  | 5203 | 5291 | 5.18534432847 |
| NM_005063 | SCD    | 129  | 362  | 6.70335283646 |
| NM_005063 | SCD    | 3522 | 3569 | 4.27039342919 |
| NM_005063 | SCD    | 1600 | 2415 | 9.33216962677 |
| NM_005063 | SCD    | 371  | 1592 | 9.98738432359 |
| NM_005063 | SCD    | 2939 | 2998 | 1.9484653343  |
| NM_005063 | SCD    | 3015 | 3460 | 8.01455452476 |
| NM_005063 | SCD    | 2419 | 2913 | 8.05698979108 |
| NM_005063 | SCD    | 3578 | 5464 | 9.98188833584 |
| NM_018091 | ELP3   | 970  | 1054 | 5.15683629979 |
| NM_018091 | ELP3   | 1177 | 1242 | 6.65783334145 |
| NM_018093 | WDR74  | 337  | 390  | 5.37289342405 |
| NM_018093 | WDR74  | 928  | 973  | 5.95785593232 |
| NM_018093 | WDR74  | 178  | 246  | 4.3728934316  |
| NM_018093 | WDR74  | 467  | 537  | 5.36887583142 |
| NM_018093 | WDR74  | 612  | 707  | 6.3728934316  |
| NM_139265 | EHD4   | 1783 | 1854 | 9.8599355352  |
| NM_139265 | EHD4   | 1198 | 1264 | 9.85591793525 |
| NM_139265 | EHD4   | 1146 | 1196 | 10.4447242858 |
| NM_139265 | EHD4   | 600  | 658  | 8.77579632604 |
| NM_139265 | EHD4   | 443  | 498  | 8.8597617851  |
| NM_139265 | EHD4   | 1472 | 1551 | 8.77579632604 |
| NM_000775 | CYP2J2 | 900  | 990  | 7.15122796538 |
| NM_000775 | CYP2J2 | 795  | 861  | 7.15122820129 |
| NM_000775 | CYP2J2 | 409  | 461  | 7.73618397096 |
| NM_000775 | CYP2J2 | 87   | 134  | 6.14721060112 |
| NM_000775 | CYP2J2 | 304  | 407  | 7.15122820129 |
| NM_000775 | CYP2J2 | 211  | 272  | 7.73619070179 |
| NM_018098 | ECT2   | 2170 | 2205 | 7.38192181981 |
| NM_018098 | ECT2   | 3448 | 3558 | 7.38192855065 |
| NM_018098 | ECT2   | 3620 | 3684 | 7.38192855087 |
| NM_018098 | ECT2   | 3942 | 3999 | 5.79294844997 |
| NM_018098 | ECT2   | 2310 | 2355 | 6.79294844997 |
| NM_018098 | ECT2   | 3265 | 3347 | 8.11889414503 |
| NM_018098 | ECT2   | 2046 | 2088 | 6.79679229983 |
| NM_018098 | ECT2   | 1544 | 1609 | 6.79695931909 |
| NM_018098 | ECT2   | 1317 | 1371 | 5.79679229983 |
| NM_018098 | ECT2   | 1831 | 1888 | 7.38192855087 |
| NM_018098 | ECT2   | 212  | 322  | 7.79696605015 |
| NM_018098 | ECT2   | 1223 | 1277 | 5.79294844997 |
| NM_018098 | ECT2   | 2621 | 2666 | 6.79294844997 |
| NM_018098 | ECT2   | 3161 | 3244 | 8.11889414503 |
| NM_018098 | ECT2   | 1976 | 2023 | 7.38192854332 |
| NM_018098 | ECT2   | 99   | 201  | 8.11889414503 |
| NM_018098 | ECT2   | 642  | 736  | 7.38192855087 |

|           |        |      |      |               |
|-----------|--------|------|------|---------------|
| NM_018098 | ECT2   | 2808 | 2900 | 7.79696605015 |
| NM_018098 | ECT2   | 2903 | 2970 | 7.38192855087 |
| NM_018098 | ECT2   | 2398 | 2600 | 9.38192855087 |
| NM_018098 | ECT2   | 1105 | 1187 | 7.79696605015 |
| NM_018098 | ECT2   | 1628 | 1720 | 6.79696605015 |
| NM_018098 | ECT2   | 821  | 1076 | 9.11889414503 |
| NM_018098 | ECT2   | 397  | 548  | 8.38192855087 |
| NM_139266 | STAT1  | 671  | 748  | 5.80509626132 |
| NM_139266 | STAT1  | 1390 | 1461 | 7.12702435621 |
| NM_139266 | STAT1  | 1576 | 1636 | 5.80107866115 |
| NM_139266 | STAT1  | 1709 | 1758 | 5.80107866115 |
| NM_139266 | STAT1  | 1034 | 1136 | 5.80509626133 |
| NM_139266 | STAT1  | 239  | 273  | 5.72095705194 |
| NM_139266 | STAT1  | 460  | 550  | 6.39005876205 |
| NM_139266 | STAT1  | 2456 | 2522 | 4.80508953027 |
| NM_139266 | STAT1  | 2244 | 2404 | 6.80509626133 |
| NM_139266 | STAT1  | 1996 | 2126 | 5.80509626133 |
| NM_139266 | STAT1  | 1807 | 1891 | 5.80509625378 |
| NM_139266 | STAT1  | 396  | 455  | 4.80509625378 |
| NM_139266 | STAT1  | 1475 | 1542 | 4.80509625378 |
| NM_139266 | STAT1  | 831  | 1027 | 6.39005876205 |
| NM_001761 | CCNF   | 209  | 297  | 8.78161131642 |
| NM_001761 | CCNF   | 1325 | 1421 | 8.78161131642 |
| NM_001761 | CCNF   | 2051 | 2133 | 8.78161130887 |
| NM_001761 | CCNF   | 1580 | 1621 | 7.7816113162  |
| NM_001761 | CCNF   | 891  | 943  | 9.36656708608 |
| NM_001761 | CCNF   | 3115 | 3207 | 8.78161131642 |
| NM_001761 | CCNF   | 2383 | 2463 | 7.7814375661  |
| NM_001761 | CCNF   | 416  | 472  | 8.77759371624 |
| NM_001761 | CCNF   | 3575 | 3654 | 7.78160458536 |
| NM_001761 | CCNF   | 650  | 690  | 9.36656708608 |
| NM_001761 | CCNF   | 1214 | 1271 | 8.78160458536 |
| NM_001761 | CCNF   | 954  | 1050 | 9.78161131642 |
| NM_001761 | CCNF   | 527  | 575  | 9.28243460775 |
| NM_001761 | CCNF   | 3686 | 3813 | 9.36657381714 |
| NM_001761 | CCNF   | 3037 | 3074 | 8.69747210703 |
| NM_001761 | CCNF   | 300  | 410  | 9.36657381714 |
| NM_001761 | CCNF   | 1466 | 1567 | 9.36657381714 |
| NM_001761 | CCNF   | 1055 | 1113 | 8.77759371624 |
| NM_001812 | CENPC1 | 2896 | 2985 | 6.86150713329 |
| NM_001762 | CCT6A  | 1954 | 2009 | 2.88468500969 |
| NM_001762 | CCT6A  | 2207 | 2272 | 4.46964751041 |
| NM_001762 | CCT6A  | 2079 | 2123 | 4.20661310457 |
| NM_001762 | CCT6A  | 2535 | 2663 | 3.46964751041 |
| NM_001762 | CCT6A  | 100  | 213  | 4.20661310457 |
| NM_001762 | CCT6A  | 1491 | 1952 | 7.86196493319 |
| NM_001762 | CCT6A  | 225  | 370  | 5.20661310457 |
| NM_001762 | CCT6A  | 2402 | 2517 | 4.69203993174 |
| NM_001762 | CCT6A  | 863  | 1432 | 7.92907912904 |
| NM_001762 | CCT6A  | 407  | 845  | 7.46964751041 |

|              |           |      |      |               |               |
|--------------|-----------|------|------|---------------|---------------|
| NM_001206931 | SLC6A12   | 13   | 56   | 10.6232793736 |               |
| NM_001206931 | SLC6A12   | 864  | 964  | 13.9492250687 |               |
| NM_001206931 | SLC6A12   | 1920 | 2032 | 14.2122594745 |               |
| NM_001206931 | SLC6A12   | 2977 | 3073 | 12.2122594745 |               |
| NM_001206931 | SLC6A12   | 1262 | 1329 | 12.6272969738 |               |
| NM_001206931 | SLC6A12   | 168  | 253  | 11.6272969738 |               |
| NM_001206931 | SLC6A12   | 94   | 162  | 10.6272969735 |               |
| NM_001206931 | SLC6A12   | 2586 | 2683 | 12.2122594743 |               |
| NM_001206931 | SLC6A12   | 636  | 862  | 14.9492250687 |               |
| NM_001206931 | SLC6A12   | 2112 | 2179 | 10.6272969662 |               |
| NM_001206931 | SLC6A12   | 1561 | 1913 | 15.6716910931 |               |
| NM_001206931 | SLC6A12   | 2224 | 2315 | 11.6272969738 |               |
| NM_001206931 | SLC6A12   | 2789 | 2946 | 13.4346518958 |               |
| NM_001206931 | SLC6A12   | 2522 | 2580 | 12.1281202651 |               |
| NM_001206931 | SLC6A12   | 966  | 1242 | 14.4346518958 |               |
| NM_001206931 | SLC6A12   | 1330 | 1555 | 14.5341875694 |               |
| NM_001206931 | SLC6A12   | 405  | 632  | 14.4346518958 |               |
| NM_001818    | AKR1C4    | 1064 | 1117 | 6.6145386775  |               |
| NM_001818    | AKR1C4    | 193  | 292  | 8.6145386775  |               |
| NM_001818    | AKR1C4    | 129  | 189  | 5.53039946812 |               |
| NM_001818    | AKR1C4    | 633  | 693  | 7.6145386775  |               |
| NM_001818    | AKR1C4    | 793  | 898  | 7.93646676484 |               |
| NM_004227    | CYTH3     | 142  | 245  | 7.24075499447 |               |
| NM_022494    | ZDHHC6    | 1896 | 1977 | 7.86481994612 |               |
| NM_022494    | ZDHHC6    | 461  | 504  | 6.27985071434 |               |
| NM_022494    | ZDHHC6    | 1384 | 1429 | 6.8646461958  |               |
| NM_022494    | ZDHHC6    | 919  | 972  | 6.2798574454  |               |
| NM_022494    | ZDHHC6    | 580  | 691  | 8.2798574454  |               |
| NM_022494    | ZDHHC6    | 77   | 112  | 6.78068073673 |               |
| NM_022494    | ZDHHC6    | 513  | 569  | 7.27985071434 |               |
| NM_022494    | ZDHHC6    | 1172 | 1295 | 7.60178554028 |               |
| NM_022494    | ZDHHC6    | 764  | 912  | 8.2798574454  |               |
| NM_022495    | C14orf135 |      | 1979 | 2024          | 8.11139949572 |
| NM_022495    | C14orf135 |      | 1741 | 1781          | 7.52259314514 |
| NM_022495    | C14orf135 |      | 3107 | 3190          | 8.5266107451  |
| NM_022495    | C14orf135 |      | 1088 | 1140          | 8.84853210915 |
| NM_022495    | C14orf135 |      | 1144 | 1183          | 8.526436995   |
| NM_022495    | C14orf135 |      | 2930 | 3040          | 8.84853883998 |
| NM_022495    | C14orf135 |      | 3321 | 3374          | 8.84853210915 |
| NM_022495    | C14orf135 |      | 497  | 615           | 9.11157324604 |
| NM_022495    | C14orf135 |      | 2826 | 2881          | 7.526436995   |
| NM_022495    | C14orf135 |      | 2264 | 2289          | 7.44247153593 |
| NM_022495    | C14orf135 |      | 2196 | 2253          | 6.526436995   |
| NM_022495    | C14orf135 |      | 3808 | 3857          | 7.52259314514 |
| NM_022495    | C14orf135 |      | 3529 | 3638          | 8.52661074532 |
| NM_022495    | C14orf135 |      | 1232 | 1284          | 8.84853883998 |
| NM_022495    | C14orf135 |      | 1328 | 1483          | 9.33396566738 |
| NM_022495    | C14orf135 |      | 726  | 838           | 8.52661074532 |
| NM_022496    | ACTR6     | 1896 | 1947 | 5.95085202185 |               |
| NM_022496    | ACTR6     | 1799 | 1830 | 6.95085202185 |               |

|              |          |       |       |                   |
|--------------|----------|-------|-------|-------------------|
| NM_022497    | MRPS25   | 1819  | 1889  | 6.05965249982     |
| NM_022497    | MRPS25   | 715   | 756   | 6.05563489987     |
| NM_022491    | SUDS3    | 4092  | 4168  | 2.93751477677     |
| NM_014206    | C11orf10 |       | 99    | 137 7.35761273888 |
| NM_014206    | C11orf10 |       | 343   | 390 6.35743899611 |
| NM_014206    | C11orf10 |       | 188   | 334 10.1649676685 |
| NM_001161009 | ARMC10   | 532   | 580   | 9.25502406229     |
| NM_001161009 | ARMC10   | 1031  | 1075  | 9.25485704303     |
| NM_001161009 | ARMC10   | 818   | 883   | 9.67006829262     |
| NM_001161009 | ARMC10   | 583   | 650   | 8.67006829262     |
| NM_001142311 | TMEM169  | 2286  | 2322  | 8.73319325599     |
| NM_025204    | TRABD    | 189   | 269   | 6.21462943864     |
| NM_025204    | TRABD    | 1577  | 1618  | 5.21078558878     |
| NM_025204    | TRABD    | 129   | 175   | 5.13066397957     |
| NM_025204    | TRABD    | 1740  | 1786  | 6.21480318895     |
| NM_025204    | TRABD    | 1406  | 1455  | 5.2147964579      |
| NM_025204    | TRABD    | 727   | 822   | 6.79976568968     |
| NM_025204    | TRABD    | 2029  | 2075  | 5.21078558878     |
| NM_025204    | TRABD    | 969   | 1047  | 6.79975895863     |
| NM_025204    | TRABD    | 279   | 328   | 7.21480318896     |
| NM_025204    | TRABD    | 399   | 475   | 6.79976545376     |
| NM_025204    | TRABD    | 1876  | 1929  | 6.79574808951     |
| NM_025204    | TRABD    | 2182  | 2297  | 6.79976568968     |
| NM_025204    | TRABD    | 1116  | 1157  | 5.21078558878     |
| NM_025205    | MED28    | 694   | 749   | 2.95723771713     |
| NM_025205    | MED28    | 301   | 390   | 2.95723795305     |
| NM_025205    | MED28    | 768   | 809   | 1.95706420274     |
| NM_025205    | MED28    | 134   | 222   | 4.95723795305     |
| NM_025205    | MED28    | 941   | 1041  | 2.95723795305     |
| NM_001107    | ACYP1    | 486   | 557   | 7.10221138108     |
| NM_001106    | ACVR2B   | 11150 | 11170 | 7.64910639642     |
| NM_001101    | ACTB     | 1578  | 1801  | 5.89944806047     |
| NM_001101    | ACTB     | 4     | 1556  | 8.56241307319     |
| NM_001100    | ACTA1    | 733   | 783   | 10.3885532789     |
| NM_001100    | ACTA1    | 451   | 494   | 10.3885532789     |
| NM_001100    | ACTA1    | 504   | 548   | 9.97351577964     |
| NM_001100    | ACTA1    | 1120  | 1181  | 11.195908201      |
| NM_025209    | EPC1     | 2307  | 2366  | 6.18581325585     |
| NM_198332    | STAT2    | 4054  | 4083  | 6.26268947507     |
| NM_198332    | STAT2    | 2699  | 2784  | 7.34281108428     |
| NM_198332    | STAT2    | 456   | 510   | 6.34281108428     |
| NM_016143    | NSFL1C   | 1871  | 1938  | 4.93067712678     |
| NM_016143    | NSFL1C   | 2864  | 2922  | 3.84653791739     |
| NM_016143    | NSFL1C   | 1521  | 1616  | 3.93067712678     |
| NM_016143    | NSFL1C   | 1396  | 1478  | 3.93067712678     |
| NM_016143    | NSFL1C   | 2221  | 2280  | 2.93067711923     |
| NM_016143    | NSFL1C   | 1211  | 1313  | 4.5156396275      |
| NM_016143    | NSFL1C   | 1065  | 1110  | 3.93050337646     |
| NM_016143    | NSFL1C   | 1798  | 1848  | 3.93050337646     |
| NM_016143    | NSFL1C   | 2080  | 2211  | 3.93067712678     |

|           |          |      |      |               |               |
|-----------|----------|------|------|---------------|---------------|
| NM_016143 | NSFL1C   | 941  | 1033 | 5.5156396275  |               |
| NM_016142 | HSD17B12 |      | 1395 | 1491          | 5.51625498048 |
| NM_016142 | HSD17B12 |      | 1707 | 1776          | 4.19432015454 |
| NM_016142 | HSD17B12 |      | 1226 | 1289          | 5.77928938631 |
| NM_016142 | HSD17B12 |      | 936  | 1193          | 7.77928938631 |
| NM_016142 | HSD17B12 |      | 1304 | 1390          | 6.36425188703 |
| NM_016142 | HSD17B12 |      | 1877 | 1981          | 4.19432688537 |
| NM_016142 | HSD17B12 |      | 356  | 465           | 6.19432688559 |
| NM_016142 | HSD17B12 |      | 1515 | 1656          | 6.36425188703 |
| NM_016142 | HSD17B12 |      | 471  | 923           | 9.19432688559 |
| NM_016142 | HSD17B12 |      | 155  | 253           | 4.19432688537 |
| NM_016142 | HSD17B12 |      | 2133 | 2258          | 5.77928938631 |
| NM_016145 | C19orf56 |      | 318  | 394           | 8.66764272095 |
| NM_016145 | C19orf56 |      | 579  | 720           | 9.83756772239 |
| NM_016145 | C19orf56 |      | 781  | 833           | 7.66362512078 |
| NM_016145 | C19orf56 |      | 398  | 557           | 10.474997643  |
| NM_016147 | PPME1    | 629  | 776  | 5.94066121535 |               |
| NM_016147 | PPME1    | 504  | 567  | 5.20368889013 |               |
| NM_016146 | TRAPPC4  | 835  | 893  | 7.22632531285 |               |
| NM_016146 | TRAPPC4  | 496  | 542  | 6.81128781357 |               |
| NM_016146 | TRAPPC4  | 449  | 486  | 6.22632531285 |               |
| NM_016146 | TRAPPC4  | 271  | 315  | 6.81112079431 |               |
| NM_016146 | TRAPPC4  | 894  | 988  | 7.81129454462 |               |
| NM_016146 | TRAPPC4  | 1012 | 1142 | 7.22633204391 |               |
| NM_016146 | TRAPPC4  | 728  | 811  | 7.22633204391 |               |
| NM_016146 | TRAPPC4  | 322  | 388  | 6.22632531285 |               |
| NM_004568 | SERPINB6 |      | 1387 | 1448          | 4.85498729288 |
| NM_004568 | SERPINB6 |      | 1293 | 1379          | 6.44396739377 |
| NM_004568 | SERPINB6 |      | 1015 | 1251          | 7.18093298794 |
| NM_004568 | SERPINB6 |      | 603  | 679           | 5.44396739377 |
| NM_004569 | PIGH     | 750  | 810  | 8.18636667445 |               |
| NM_004569 | PIGH     | 282  | 385  | 8.186366682   |               |
| NM_004569 | PIGH     | 151  | 234  | 7.59738658111 |               |
| NM_017814 | TMEM161A |      | 509  | 567           | 11.1060261778 |
| NM_017814 | TMEM161A |      | 1470 | 1506          | 8.78008048274 |
| NM_017814 | TMEM161A |      | 1538 | 1594          | 9.69995887353 |
| NM_017814 | TMEM161A |      | 1632 | 1722          | 11.591453005  |
| NM_017814 | TMEM161A |      | 1153 | 1279          | 11.9540230844 |
| NM_017814 | TMEM161A |      | 811  | 1052          | 13.3690605836 |
| NM_017814 | TMEM161A |      | 1324 | 1468          | 11.9540230844 |
| NM_017814 | TMEM161A |      | 56   | 181           | 11.9540230844 |
| NM_017814 | TMEM161A |      | 439  | 507           | 10.7840980829 |
| NM_017814 | TMEM161A |      | 571  | 791           | 12.3690605836 |
| NM_017814 | TMEM161A |      | 292  | 432           | 12.4845378011 |
| NM_017816 | LYAR     | 1383 | 1497 | 6.42760567264 |               |
| NM_017816 | LYAR     | 1268 | 1383 | 4.42760543672 |               |
| NM_017816 | LYAR     | 317  | 396  | 5.42760543672 |               |
| NM_017816 | LYAR     | 102  | 206  | 7.01256817336 |               |
| NM_017810 | ZNF434   | 743  | 774  | 7.13293065813 |               |
| NM_017811 | UBE2R2   | 601  | 653  | 4.59006423271 |               |

|           |         |      |      |               |
|-----------|---------|------|------|---------------|
| NM_017811 | UBE2R2  | 1551 | 1650 | 6.39741939069 |
| NM_017811 | UBE2R2  | 1481 | 1538 | 5.1750202383  |
| NM_017811 | UBE2R2  | 1653 | 1708 | 5.1750202383  |
| NM_017811 | UBE2R2  | 653  | 726  | 4.59006446841 |
| NM_017811 | UBE2R2  | 3816 | 3881 | 3.58989071831 |
| NM_017811 | UBE2R2  | 3288 | 3319 | 3.50592525925 |
| NM_017811 | UBE2R2  | 829  | 923  | 5.91199256352 |
| NM_017811 | UBE2R2  | 1165 | 1297 | 7.04949608727 |
| NM_017811 | UBE2R2  | 3926 | 4006 | 3.58989071831 |
| NM_017811 | UBE2R2  | 769  | 828  | 3.58604686846 |
| NM_017812 | CHCHD3  | 220  | 300  | 6.72378597638 |
| NM_017812 | CHCHD3  | 366  | 428  | 3.9164310541  |
| NM_017812 | CHCHD3  | 1311 | 1384 | 5.50139355504 |
| NM_017813 | IMPAD1  | 1254 | 1300 | 5.86312337783 |
| NM_017813 | IMPAD1  | 1174 | 1203 | 7.53221835689 |
| NM_017813 | IMPAD1  | 452  | 501  | 5.947262587   |
| NM_017813 | IMPAD1  | 1684 | 1754 | 7.53222508772 |
| NM_017813 | IMPAD1  | 1413 | 1481 | 8.75461750928 |
| NM_017813 | IMPAD1  | 2287 | 2336 | 5.86312337783 |
| NM_017813 | IMPAD1  | 1082 | 1164 | 6.94725585617 |
| NM_017813 | IMPAD1  | 5865 | 5911 | 6.94324498705 |
| NM_017813 | IMPAD1  | 3496 | 3541 | 5.94726258722 |
| NM_017813 | IMPAD1  | 2584 | 2659 | 7.94725585617 |
| NM_017813 | IMPAD1  | 4066 | 4163 | 6.947262587   |
| NM_017813 | IMPAD1  | 667  | 744  | 8.26919068211 |
| NM_017813 | IMPAD1  | 201  | 245  | 5.94324498705 |
| NM_017813 | IMPAD1  | 786  | 893  | 8.75461750928 |
| NM_017813 | IMPAD1  | 4873 | 4932 | 6.86312337783 |
| NM_017813 | IMPAD1  | 7110 | 7211 | 6.9472623513  |
| NM_017813 | IMPAD1  | 1939 | 2048 | 7.53222508794 |
| NM_017813 | IMPAD1  | 918  | 1079 | 8.75461750928 |
| NM_017813 | IMPAD1  | 329  | 415  | 6.94726258722 |
| NM_017818 | WRAP73  | 1618 | 1677 | 7.9571517229  |
| NM_017818 | WRAP73  | 124  | 178  | 9.03727333211 |
| NM_017818 | WRAP73  | 200  | 260  | 9.62223583283 |
| NM_017818 | WRAP73  | 1174 | 1221 | 9.03727333211 |
| NM_017819 | RG9MTD1 | 344  | 383  | 5.92752919042 |
| NM_017819 | RG9MTD1 | 1281 | 1313 | 5.92752919042 |
| NM_017819 | RG9MTD1 | 1517 | 1633 | 8.33359649469 |
| NM_017819 | RG9MTD1 | 107  | 203  | 7.59663090052 |
| NM_017819 | RG9MTD1 | 1355 | 1454 | 7.59663090052 |
| NM_020170 | NCLN    | 206  | 264  | 8.26202064841 |
| NM_020170 | NCLN    | 3464 | 3549 | 8.84698314913 |
| NM_020170 | NCLN    | 3212 | 3273 | 7.26202064841 |
| NM_020170 | NCLN    | 408  | 444  | 7.84698314891 |
| NM_020170 | NCLN    | 631  | 684  | 6.25800304824 |
| NM_020170 | NCLN    | 1348 | 1428 | 8.84698314913 |
| NM_020170 | NCLN    | 2881 | 2989 | 8.5839487433  |
| NM_020170 | NCLN    | 864  | 1102 | 9.96246036655 |
| NM_020170 | NCLN    | 1273 | 1348 | 6.26202041249 |



|           |         |      |      |               |
|-----------|---------|------|------|---------------|
| NM_020170 | NCLN    | 310  | 393  | 7.26202064841 |
| NM_020170 | NCLN    | 1496 | 1661 | 9.43194564986 |
| NM_020170 | NCLN    | 2575 | 2706 | 8.26202064841 |
| NM_020170 | NCLN    | 2996 | 3121 | 7.26202064841 |
| NM_020170 | NCLN    | 2220 | 2382 | 9.06937557047 |
| NM_020170 | NCLN    | 1180 | 1270 | 7.84698314913 |
| NM_020170 | NCLN    | 2388 | 2518 | 7.84698314913 |
| NM_020170 | NCLN    | 3598 | 3696 | 7.84698314913 |
| NM_020170 | NCLN    | 530  | 616  | 9.43194564986 |
| NM_020170 | NCLN    | 1709 | 1833 | 8.26202064841 |
| NM_020170 | NCLN    | 1936 | 2220 | 9.43194564986 |
| NM_015948 | SLC35B3 | 710  | 757  | 9.13378546225 |
| NM_015948 | SLC35B3 | 1582 | 1621 | 7.81185759574 |
| NM_015948 | SLC35B3 | 1176 | 1233 | 7.81185087223 |
| NM_015948 | SLC35B3 | 1657 | 1756 | 7.81185759574 |
| NM_015948 | SLC35B3 | 1954 | 2054 | 8.81185760328 |
| NM_015948 | SLC35B3 | 909  | 997  | 7.81168385297 |
| NM_015948 | SLC35B3 | 1341 | 1439 | 6.81185736737 |
| NM_015948 | SLC35B3 | 1780 | 1866 | 6.81185760306 |
| NM_015949 | GET4    | 1736 | 1800 | 6.2087597204  |
| NM_015949 | GET4    | 661  | 756  | 8.79372222113 |
| NM_015949 | GET4    | 955  | 1014 | 7.20875972018 |
| NM_015949 | GET4    | 263  | 326  | 7.7937222209  |
| NM_015949 | GET4    | 530  | 638  | 9.53068781529 |
| NM_015949 | GET4    | 349  | 504  | 10.115650316  |
| NM_015949 | GET4    | 1522 | 1612 | 7.2087597204  |
| NM_015949 | GET4    | 1813 | 1851 | 6.20474212023 |
| NM_015949 | GET4    | 187  | 262  | 8.53068781529 |
| NM_015949 | GET4    | 1049 | 1147 | 8.53068781529 |
| NM_015949 | GET4    | 1195 | 1266 | 7.79372222113 |
| NM_015949 | GET4    | 766  | 951  | 10.3786847218 |
| NM_015949 | GET4    | 1888 | 2000 | 8.79372222113 |
| NM_016494 | RNF181  | 438  | 494  | 2.69892665075 |
| NM_016494 | RNF181  | 378  | 409  | 4.28371540115 |
| NM_016494 | RNF181  | 215  | 314  | 5.28388915147 |
| NM_016494 | RNF181  | 69   | 205  | 5.86885165219 |
| NM_016360 | TAC01   | 944  | 982  | 2.93476002538 |
| NM_016360 | TAC01   | 189  | 240  | 3.93877089449 |
| NM_016491 | MRPL37  | 737  | 847  | 7.40485590669 |
| NM_016491 | MRPL37  | 36   | 85   | 5.81587580579 |
| NM_016491 | MRPL37  | 668  | 733  | 5.81989339841 |
| NM_016491 | MRPL37  | 362  | 401  | 5.81587580579 |
| NM_016491 | MRPL37  | 1253 | 1295 | 7.81971965565 |
| NM_016491 | MRPL37  | 479  | 659  | 8.81989340596 |
| NM_016491 | MRPL37  | 889  | 975  | 6.81988667491 |
| NM_015941 | ATP6V1H | 1987 | 2033 | 3.7344376272  |
| NM_015941 | ATP6V1H | 1258 | 1305 | 3.73461137752 |
| NM_015941 | ATP6V1H | 1039 | 1096 | 5.31957364232 |
| NM_015941 | ATP6V1H | 1456 | 1519 | 6.0565394724  |
| NM_015941 | ATP6V1H | 1385 | 1436 | 4.7346111416  |

|              |          |      |      |                |               |
|--------------|----------|------|------|----------------|---------------|
| NM_015941    | ATP6V1H  | 1196 | 1235 | 3.73059377734  |               |
| NM_015941    | ATP6V1H  | 802  | 888  | 5.73461137752  |               |
| NM_015941    | ATP6V1H  | 1824 | 1893 | 5.31957364232  |               |
| NM_015941    | ATP6V1H  | 631  | 683  | 5.31956714718  |               |
| NM_015941    | ATP6V1H  | 108  | 396  | 6.73461137752  |               |
| NM_015941    | ATP6V1H  | 696  | 788  | 5.31957387069  |               |
| NM_015942    | MTERFD1  | 216  | 301  | 7.92832360874  |               |
| NM_015944    | AMDHD2   | 1026 | 1062 | 7.00665233675  |               |
| NM_015944    | AMDHD2   | 1297 | 1359 | 7.09079154591  |               |
| NM_015944    | AMDHD2   | 279  | 339  | 7.00665233675  |               |
| NM_015946    | PELO     | 175  | 227  | 5.94138492264  |               |
| NM_015946    | PELO     | 286  | 325  | 4.94121117232  |               |
| NM_015946    | PELO     | 77   | 149  | 6.52634741581  |               |
| NM_016498    | MTFP1    | 623  | 670  | 8.60293719408  |               |
| NM_016498    | MTFP1    | 696  | 767  | 9.60678104393  |               |
| NM_016498    | MTFP1    | 488  | 590  | 8.60695479425  |               |
| NM_138425    | C12orf57 |      | 179  | 209            | 5.1004283779  |
| NM_138425    | C12orf57 |      | 347  | 398            | 5.09658452805 |
| NM_138425    | C12orf57 |      | 8    | 72             | 7.68556462894 |
| NM_138426    | GLCCI1   | 1745 | 1809 | 9.52865468235  |               |
| NM_138426    | GLCCI1   | 1480 | 1535 | 9.52865468235  |               |
| NM_138421    | SAAL1    | 283  | 326  | 7.51024636118  |               |
| NM_138428    | C1orf212 |      | 138  | 184            | 7.41201452857 |
| NM_138428    | C1orf212 |      | 500  | 541            | 7.41218154784 |
| NM_138428    | C1orf212 |      | 662  | 751            | 8.41201452857 |
| NM_138428    | C1orf212 |      | 1050 | 1071           | 7.32804906951 |
| NM_138428    | C1orf212 |      | 2159 | 2217           | 7.41218827889 |
| NM_017644    | KLHL24   | 1553 | 1607 | 7.7360760981   |               |
| NM_017644    | KLHL24   | 1494 | 1547 | 6.7360760981   |               |
| NM_198847    | FAM111A  | 2390 | 2444 | 8.73271311032  |               |
| NM_198847    | FAM111A  | 1380 | 1446 | 9.72869551015  |               |
| NM_198847    | FAM111A  | 497  | 580  | 9.31766887999  |               |
| NM_017651    | AHI1     | 712  | 733  | 7.4306192258   |               |
| NM_017651    | AHI1     | 1863 | 1923 | 7.35049761658  |               |
| NM_017651    | AHI1     | 1934 | 1994 | 8.43463009491  |               |
| NM_001199919 | PGM3     | 1383 | 1440 | 5.809553346    |               |
| NM_001199919 | PGM3     | 850  | 889  | 4.14045163612  |               |
| NM_001199919 | PGM3     | 1034 | 1089 | 5.22057324533  |               |
| NM_001199919 | PGM3     | 1579 | 1650 | 5.22459060958  |               |
| NM_001199919 | PGM3     | 1164 | 1277 | 5.80955334622  |               |
| NM_001199919 | PGM3     | 785  | 849  | 4.22458411445  |               |
| NM_001199919 | PGM3     | 34   | 270  | 7.68402246414  |               |
| NM_001199919 | PGM3     | 360  | 495  | 5.2245908455   |               |
| NM_198591    | BSG      | 1124 | 1194 | 0.795135280037 |               |
| NM_198591    | BSG      | 1249 | 1528 | 5.79513528004  |               |
| NM_198591    | BSG      | 293  | 1121 | 6.90365973681  |               |
| NM_001206542 | CASP10   | 1307 | 1398 | 8.47974395495  |               |
| NM_001206542 | CASP10   | 477  | 537  | 6.4759001051   |               |
| NM_173496    | MPP7     | 286  | 334  | 7.22779509962  |               |
| NM_199420    | POLQ     | 7429 | 7479 | 9.33816505557  |               |

|           |         |      |      |               |
|-----------|---------|------|------|---------------|
| NM_199421 | SOCS4   | 3211 | 3298 | 8.15615068985 |
| NM_199421 | SOCS4   | 6321 | 6359 | 8.15615068985 |
| NM_199421 | SOCS4   | 6094 | 6163 | 7.24011614892 |
| NM_199421 | SOCS4   | 1675 | 1748 | 8.8252456689  |
| NM_024840 | ZNF613  | 223  | 260  | 8.69968844766 |
| NM_024330 | SLC27A3 | 1038 | 1123 | 12.7392025926 |
| NM_024330 | SLC27A3 | 504  | 569  | 11.7392025926 |
| NM_024330 | SLC27A3 | 448  | 504  | 10.739202585  |
| NM_024330 | SLC27A3 | 1229 | 1302 | 12.7392025926 |
| NM_024330 | SLC27A3 | 1318 | 1358 | 10.7392025923 |
| NM_024330 | SLC27A3 | 1590 | 1648 | 9.73518499238 |
| NM_024330 | SLC27A3 | 2364 | 2408 | 11.3241583622 |
| NM_024330 | SLC27A3 | 1440 | 1542 | 11.7392025926 |
| NM_024330 | SLC27A3 | 2239 | 2359 | 11.3241650933 |
| NM_024330 | SLC27A3 | 1696 | 1861 | 12.7392025926 |
| NM_024330 | SLC27A3 | 695  | 785  | 10.7392025926 |
| NM_024330 | SLC27A3 | 94   | 351  | 13.4396423107 |
| NM_024330 | SLC27A3 | 955  | 1037 | 12.5465575146 |
| NM_024330 | SLC27A3 | 1940 | 2076 | 11.7392025926 |
| NM_024330 | SLC27A3 | 2096 | 2208 | 12.5465575146 |
| NM_024845 | NAA60   | 970  | 1016 | 5.90103763634 |
| NM_024845 | NAA60   | 1684 | 1744 | 7.21894813105 |
| NM_024845 | NAA60   | 363  | 437  | 6.48600013706 |
| NM_024845 | NAA60   | 709  | 801  | 6.48600013706 |
| NM_024845 | NAA60   | 255  | 306  | 4.90103090529 |
| NM_024845 | NAA60   | 1799 | 1847 | 4.89702003617 |
| NM_024845 | NAA60   | 2361 | 2484 | 5.90103763634 |
| NM_024845 | NAA60   | 1367 | 1428 | 4.89702003617 |
| NM_024844 | NUP85   | 1761 | 1846 | 7.50155022231 |
| NM_024844 | NUP85   | 1376 | 1422 | 5.50154998639 |
| NM_024844 | NUP85   | 1652 | 1720 | 6.50155022231 |
| NM_024844 | NUP85   | 281  | 320  | 6.50155021476 |
| NM_024844 | NUP85   | 838  | 891  | 6.49753262214 |
| NM_024844 | NUP85   | 2197 | 2269 | 7.08651272303 |
| NM_024844 | NUP85   | 325  | 374  | 7.08249512286 |
| NM_024844 | NUP85   | 777  | 831  | 7.50154998639 |
| NM_024844 | NUP85   | 1937 | 2009 | 8.08651272303 |
| NM_024844 | NUP85   | 1451 | 1633 | 8.50155022231 |
| NM_024844 | NUP85   | 1098 | 1304 | 9.08651272303 |
| NM_024844 | NUP85   | 2013 | 2187 | 8.08651272303 |
| NM_024847 | TMC7    | 628  | 674  | 9.47050061362 |
| NM_024847 | TMC7    | 1345 | 1391 | 9.05546312189 |
| NM_024847 | TMC7    | 1093 | 1170 | 9.05546312189 |
| NM_024847 | TMC7    | 1925 | 2034 | 10.2778555432 |
| NM_024847 | TMC7    | 747  | 861  | 10.9299322398 |
| NM_024847 | TMC7    | 3244 | 3286 | 8.466483021   |
| NM_024847 | TMC7    | 3306 | 3359 | 7.47049389012 |
| NM_024847 | TMC7    | 1424 | 1469 | 9.05546288597 |
| NM_024847 | TMC7    | 200  | 312  | 10.7924287161 |
| NM_024847 | TMC7    | 388  | 498  | 10.0554631219 |

|              |         |      |      |               |
|--------------|---------|------|------|---------------|
| NM_024847    | TMC7    | 971  | 1089 | 10.6404256226 |
| NM_024847    | TMC7    | 1754 | 1889 | 9.79242871606 |
| NM_024847    | TMC7    | 1476 | 1728 | 11.1709403393 |
| NM_024847    | TMC7    | 2498 | 2550 | 7.47049389012 |
| NM_024847    | TMC7    | 1176 | 1297 | 9.79242871606 |
| NM_024847    | TMC7    | 4037 | 4161 | 8.47050062117 |
| NM_024847    | TMC7    | 2270 | 2369 | 9.47050062117 |
| NM_024334    | TMEM43  | 2862 | 2906 | 6.18825435636 |
| NM_024334    | TMEM43  | 424  | 468  | 8.19226522548 |
| NM_024334    | TMEM43  | 1542 | 1601 | 8.19227195653 |
| NM_024334    | TMEM43  | 619  | 689  | 7.77723445725 |
| NM_024334    | TMEM43  | 141  | 182  | 7.19226522548 |
| NM_024334    | TMEM43  | 2737 | 2801 | 7.18825435636 |
| NM_024334    | TMEM43  | 558  | 616  | 7.77706070694 |
| NM_024334    | TMEM43  | 2089 | 2190 | 7.19227195653 |
| NM_024334    | TMEM43  | 1412 | 1499 | 6.19227195653 |
| NM_024334    | TMEM43  | 2655 | 2701 | 6.18825435636 |
| NM_024334    | TMEM43  | 2240 | 2304 | 7.19209820621 |
| NM_024334    | TMEM43  | 329  | 398  | 8.51420005142 |
| NM_024334    | TMEM43  | 489  | 551  | 7.19209820621 |
| NM_024334    | TMEM43  | 1227 | 1285 | 7.19227195653 |
| NM_024334    | TMEM43  | 821  | 929  | 8.77723445725 |
| NM_024334    | TMEM43  | 1286 | 1412 | 8.77723445725 |
| NM_024334    | TMEM43  | 955  | 1061 | 8.19227195653 |
| NM_024334    | TMEM43  | 1880 | 2017 | 7.19227195653 |
| NM_024334    | TMEM43  | 2021 | 2086 | 7.19227195631 |
| NM_178862    | STT3B   | 612  | 678  | 8.45548064491 |
| NM_178862    | STT3B   | 2322 | 2363 | 6.13354581897 |
| NM_178862    | STT3B   | 1052 | 1115 | 7.13355255002 |
| NM_178862    | STT3B   | 921  | 986  | 6.13355255002 |
| NM_178862    | STT3B   | 997  | 1051 | 6.13355255002 |
| NM_178862    | STT3B   | 682  | 850  | 9.38148006347 |
| NM_178862    | STT3B   | 1140 | 1279 | 9.13355255002 |
| NM_178862    | STT3B   | 337  | 608  | 9.5258699728  |
| NM_178862    | STT3B   | 1920 | 2306 | 10.4189547689 |
| NM_178862    | STT3B   | 224  | 293  | 5.1335523141  |
| NM_178862    | STT3B   | 1298 | 1884 | 11.0642898876 |
| NM_178865    | SERINC2 | 467  | 504  | 6.89410163534 |
| NM_178865    | SERINC2 | 1394 | 1496 | 8.56320334544 |
| NM_178865    | SERINC2 | 404  | 458  | 8.56320334544 |
| NM_178865    | SERINC2 | 544  | 583  | 6.97823411367 |
| NM_178865    | SERINC2 | 1111 | 1174 | 5.97824084472 |
| NM_178865    | SERINC2 | 1750 | 1893 | 7.56320334544 |
| NM_178865    | SERINC2 | 1310 | 1379 | 8.30016893961 |
| NM_178865    | SERINC2 | 591  | 1037 | 11.5018028008 |
| NM_178865    | SERINC2 | 1663 | 1749 | 7.56320334544 |
| NM_001078170 | RGPD2   | 2025 | 2082 | 8.7294797543  |
| NM_001078170 | RGPD2   | 3474 | 3553 | 8.72930600421 |
| NM_001078170 | RGPD2   | 3385 | 3439 | 8.64534054514 |
| NM_001078170 | RGPD2   | 1909 | 1960 | 8.72947302347 |

|              |           |      |      |               |               |
|--------------|-----------|------|------|---------------|---------------|
| NM_001078170 | RGPD2     | 1449 | 1510 | 8.72546215435 |               |
| NM_001078170 | RGPD2     | 2542 | 2578 | 9.31443552419 |               |
| NM_001078170 | RGPD2     | 1024 | 1092 | 8.72947975452 |               |
| NM_001078170 | RGPD2     | 865  | 926  | 8.64534054514 |               |
| NM_001078170 | RGPD2     | 666  | 747  | 9.31444225525 |               |
| NM_001078171 | FAM127A   | 542  | 596  | 9.19230196236 |               |
| NM_001078171 | FAM127A   | 139  | 275  | 11.1923019624 |               |
| NM_001078171 | FAM127A   | 727  | 832  | 10.7772644631 |               |
| NM_001078171 | FAM127A   | 358  | 459  | 10.7772644555 |               |
| NM_001078171 | FAM127A   | 1059 | 1197 | 11.9996568844 |               |
| NM_001078175 | SLC29A1   | 2112 | 2160 | 7.34661970446 |               |
| NM_001078175 | SLC29A1   | 1154 | 1192 | 9.67256539952 |               |
| NM_001078175 | SLC29A1   | 1600 | 1717 | 10.5205623061 |               |
| NM_001078175 | SLC29A1   | 1196 | 1373 | 11.9944934944 |               |
| NM_001078175 | SLC29A1   | 1405 | 1573 | 11.1579922267 |               |
| NM_001078175 | SLC29A1   | 909  | 1074 | 10.9355998054 |               |
| NM_001078175 | SLC29A1   | 330  | 466  | 10.6725653995 |               |
| NM_001078175 | SLC29A1   | 489  | 765  | 11.3506373046 |               |
| NM_001078175 | SLC29A1   | 1728 | 2066 | 11.7429547274 |               |
| NM_001085481 | MAP1LC3B2 |      | 439  | 479           | 4.6437779859  |
| NM_001085481 | MAP1LC3B2 |      | 190  | 232           | 3.64778885502 |
| NM_001085481 | MAP1LC3B2 |      | 235  | 342           | 3.64779557852 |
| NM_153281    | HYAL1     | 1910 | 1950 | 5.88261619537 |               |
| NM_153281    | HYAL1     | 542  | 616  | 6.88278994569 |               |
| NM_153281    | HYAL1     | 1621 | 1698 | 7.46775244641 |               |
| NM_153281    | HYAL1     | 1413 | 1525 | 8.46775244641 |               |
| NM_153281    | HYAL1     | 2241 | 2304 | 6.88278321463 |               |
| NM_153281    | HYAL1     | 776  | 911  | 8.69014486775 |               |
| NM_153281    | HYAL1     | 2080 | 2154 | 6.87877234551 |               |
| NM_153281    | HYAL1     | 1732 | 1798 | 7.88278994568 |               |
| NM_153281    | HYAL1     | 1226 | 1331 | 8.69014486775 |               |
| NM_001085487 | MYSM1     | 2513 | 2578 | 4.93118026324 |               |
| NM_001085487 | MYSM1     | 7477 | 7526 | 5.9351978634  |               |
| NM_001085487 | MYSM1     | 2456 | 2506 | 4.93118026324 |               |
| NM_001085487 | MYSM1     | 1678 | 1697 | 4.93118026324 |               |
| NM_001085487 | MYSM1     | 5255 | 5309 | 4.85105865402 |               |
| NM_001085487 | MYSM1     | 2722 | 2822 | 6.52016036391 |               |
| NM_207585    | IFNAR2    | 826  | 890  | 8.6082230181  |               |
| NM_006747    | SIPA1     | 1290 | 1345 | 12.2051089848 |               |
| NM_006747    | SIPA1     | 1106 | 1157 | 10.6241573532 |               |
| NM_006579    | EBP       | 49   | 173  | 7.28730284242 |               |
| NM_006579    | EBP       | 173  | 1125 | 11.8961120851 |               |
| NM_006578    | GNB5      | 2119 | 2156 | 6.55189822673 |               |
| NM_006578    | GNB5      | 1550 | 1612 | 8.55172447663 |               |
| NM_003509    | HIST1H2AI |      | 161  | 211           | 9.01487224665 |
| NM_003051    | SLC16A1   | 1761 | 1838 | 4.84511145287 |               |
| NM_003051    | SLC16A1   | 2449 | 2519 | 5.43007395359 |               |
| NM_003051    | SLC16A1   | 2999 | 3044 | 2.8410938527  |               |
| NM_003051    | SLC16A1   | 2136 | 2194 | 4.43007395359 |               |
| NM_003051    | SLC16A1   | 2582 | 2651 | 2.84511144532 |               |

|              |          |      |      |               |
|--------------|----------|------|------|---------------|
| NM_003051    | SLC16A1  | 1077 | 1756 | 10.0250205429 |
| NM_003051    | SLC16A1  | 281  | 354  | 5.84511145287 |
| NM_003051    | SLC16A1  | 2315 | 2436 | 5.65246637493 |
| NM_003051    | SLC16A1  | 384  | 1068 | 9.58657843927 |
| NM_003051    | SLC16A1  | 1864 | 2131 | 7.48896764265 |
| NM_003051    | SLC16A1  | 2662 | 2783 | 4.43007395359 |
| NM_003051    | SLC16A1  | 2799 | 2884 | 4.84511145265 |
| NM_003051    | SLC16A1  | 158  | 281  | 6.01503645431 |
| NM_006570    | RRAGA    | 830  | 913  | 5.7498343429  |
| NM_006570    | RRAGA    | 599  | 664  | 7.74983435023 |
| NM_006570    | RRAGA    | 439  | 512  | 7.33479684363 |
| NM_006570    | RRAGA    | 1528 | 1563 | 5.74581675028 |
| NM_006570    | RRAGA    | 539  | 582  | 7.25065764179 |
| NM_006570    | RRAGA    | 1227 | 1285 | 6.7498276194  |
| NM_006570    | RRAGA    | 665  | 706  | 6.74581675028 |
| NM_006570    | RRAGA    | 120  | 174  | 5.66569514107 |
| NM_006570    | RRAGA    | 1121 | 1203 | 7.33479685117 |
| NM_006570    | RRAGA    | 1290 | 1480 | 9.33479685118 |
| NM_003501    | AC0X3    | 412  | 475  | 7.94815077299 |
| NM_003501    | AC0X3    | 815  | 878  | 7.94831779225 |
| NM_003501    | AC0X3    | 2221 | 2258 | 7.94815077299 |
| NM_003501    | AC0X3    | 524  | 586  | 7.94430692313 |
| NM_003501    | AC0X3    | 1992 | 2062 | 10.5332870238 |
| NM_006572    | GNA13    | 3703 | 3754 | 5.98512883118 |
| NM_006572    | GNA13    | 688  | 753  | 7.98914643135 |
| NM_006572    | GNA13    | 1904 | 1947 | 5.98512883118 |
| NM_006572    | GNA13    | 2788 | 2874 | 7.98914643134 |
| NM_006575    | MAP4K5   | 3853 | 3887 | 5.84114327154 |
| NM_006575    | MAP4K5   | 573  | 630  | 5.84114327154 |
| NM_001102667 | PSMA4    | 259  | 371  | 6.93579125848 |
| NM_001102667 | PSMA4    | 379  | 436  | 4.71339860122 |
| NM_001102667 | PSMA4    | 583  | 639  | 4.12843632887 |
| NM_001102667 | PSMA4    | 776  | 832  | 4.1282625861  |
| NM_001102667 | PSMA4    | 664  | 773  | 5.45036443131 |
| NM_001102667 | PSMA4    | 953  | 1046 | 5.12843633642 |
| NM_001102667 | PSMA4    | 69   | 131  | 5.45036443131 |
| NM_001102667 | PSMA4    | 149  | 222  | 5.45036443131 |
| NM_003504    | CDC45    | 198  | 249  | 7.10392576009 |
| NM_003504    | CDC45    | 1788 | 1838 | 7.10392576009 |
| NM_003504    | CDC45    | 1144 | 1187 | 7.1840473693  |
| NM_003504    | CDC45    | 1325 | 1358 | 9.18789121916 |
| NM_003504    | CDC45    | 297  | 407  | 9.18806496947 |
| NM_001011515 | PDLIM5   | 216  | 278  | 6.6292964093  |
| NM_001011515 | PDLIM5   | 305  | 360  | 6.6292964093  |
| NM_001011515 | PDLIM5   | 371  | 454  | 6.62929640908 |
| NM_001011515 | PDLIM5   | 99   | 210  | 7.6292964093  |
| NM_001011515 | PDLIM5   | 642  | 787  | 5.89233081513 |
| NM_001007239 | METTTL13 | 184  | 280  | 8.28029009861 |
| NM_001007239 | METTTL13 | 599  | 670  | 9.01725569277 |
| NM_001007239 | METTTL13 | 1419 | 1470 | 8.19615088922 |

|              |          |      |      |               |
|--------------|----------|------|------|---------------|
| NM_001007239 | METTTL13 | 500  | 587  | 8.69532759789 |
| NM_001007239 | METTTL13 | 680  | 784  | 8.69532736197 |
| NM_001007239 | METTTL13 | 1083 | 1177 | 8.28029009861 |
| NM_001007239 | METTTL13 | 932  | 987  | 6.6111883885  |
| NM_001007239 | METTTL13 | 1197 | 1260 | 6.69515384757 |
| NM_001007239 | METTTL13 | 323  | 360  | 6.69130999771 |
| NM_001007239 | METTTL13 | 2436 | 2503 | 8.27627249843 |
| NM_001007239 | METTTL13 | 1766 | 1875 | 7.69532759789 |
| NM_001007239 | METTTL13 | 995  | 1078 | 7.69532759789 |
| NM_001007239 | METTTL13 | 1935 | 2058 | 8.69532759789 |
| NM_001127266 | TMEM129  | 1070 | 1117 | 8.28117436632 |
| NM_001127266 | TMEM129  | 914  | 954  | 9.19703516448 |
| NM_001127266 | TMEM129  | 1581 | 1617 | 9.19703516448 |
| NM_001127266 | TMEM129  | 1264 | 1317 | 8.28116764281 |
| NM_001127266 | TMEM129  | 1994 | 2034 | 8.19703516448 |
| NM_001127266 | TMEM129  | 795  | 853  | 9.28117437365 |
| NM_001197319 | CLEC2D   | 889  | 945  | 10.6805465542 |
| NM_001197319 | CLEC2D   | 1687 | 1767 | 11.0955840535 |
| NM_001197319 | CLEC2D   | 1098 | 1156 | 9.09558405346 |
| NM_001197319 | CLEC2D   | 1415 | 1544 | 10.9029389755 |
| NM_001197319 | CLEC2D   | 1193 | 1245 | 9.09558405323 |
| NM_001197319 | CLEC2D   | 1768 | 2044 | 12.0024746491 |
| NM_002908    | REL      | 5660 | 5734 | 8.50173454241 |
| NM_002908    | REL      | 827  | 876  | 7.58570000148 |
| NM_002908    | REL      | 3877 | 3937 | 7.58570000148 |
| NM_002908    | REL      | 3958 | 4027 | 7.50173454241 |
| NM_002904    | RDBP     | 607  | 665  | 4.51479766947 |
| NM_002904    | RDBP     | 1039 | 1104 | 5.09975993428 |
| NM_002904    | RDBP     | 202  | 258  | 4.51479093842 |
| NM_002906    | RDX      | 4174 | 4253 | 5.28117437386 |
| NM_002906    | RDX      | 3194 | 3268 | 5.86613687458 |
| NM_002906    | RDX      | 3618 | 3688 | 4.19703516448 |
| NM_002906    | RDX      | 653  | 705  | 4.28117437386 |
| NM_002906    | RDX      | 412  | 469  | 5.28117413794 |
| NM_002906    | RDX      | 3384 | 3418 | 4.86211927441 |
| NM_002906    | RDX      | 3730 | 3856 | 4.28117437386 |
| NM_002906    | RDX      | 2147 | 2210 | 4.28117437386 |
| NM_002906    | RDX      | 1973 | 2021 | 4.28100062354 |
| NM_002906    | RDX      | 3440 | 3517 | 5.86613687458 |
| NM_002906    | RDX      | 2348 | 2418 | 4.86613687458 |
| NM_002906    | RDX      | 3862 | 3951 | 3.28117437386 |
| NM_002906    | RDX      | 3549 | 3590 | 3.28100062354 |
| NM_002906    | RDX      | 1809 | 1861 | 4.28116764281 |
| NM_002906    | RDX      | 562  | 616  | 3.27715677369 |
| NM_002906    | RDX      | 1378 | 1462 | 4.86211927441 |
| NM_002906    | RDX      | 781  | 1006 | 5.60310246875 |
| NM_002907    | RECQL    | 679  | 715  | 6.39716339569 |
| NM_002907    | RECQL    | 2080 | 2122 | 6.31319793662 |
| NM_002907    | RECQL    | 1826 | 1875 | 4.7282354359  |
| NM_002907    | RECQL    | 1271 | 1326 | 5.81220089497 |

|              |          |      |      |                   |
|--------------|----------|------|------|-------------------|
| NM_002907    | RECQL    | 504  | 650  | 6.81237464529     |
| NM_002907    | RECQL    | 1718 | 1819 | 7.81237464529     |
| NM_002907    | RECQL    | 1094 | 1217 | 6.81237464529     |
| NM_001166347 | SLC26A11 |      | 572  | 627 10.8714311667 |
| NM_002901    | RCN1     | 1662 | 1711 | 5.17957159404     |
| NM_002901    | RCN1     | 1379 | 1464 | 6.98692651588     |
| NM_002901    | RCN1     | 1745 | 1814 | 6.50149968893     |
| NM_002901    | RCN1     | 1883 | 1987 | 4.17956486299     |
| NM_002901    | RCN1     | 210  | 289  | 5.17957159404     |
| NM_002901    | RCN1     | 1475 | 1562 | 5.76453409476     |
| NM_002901    | RCN1     | 1605 | 1642 | 4.17957135812     |
| NM_002901    | RCN1     | 2191 | 2241 | 5.76453409476     |
| NM_002901    | RCN1     | 293  | 328  | 4.09543238466     |
| NM_002901    | RCN1     | 2007 | 2058 | 5.17957158649     |
| NM_002901    | RCN1     | 392  | 685  | 8.50149968893     |
| NM_002901    | RCN1     | 753  | 1370 | 10.0622146434     |
| NM_002902    | RCN2     | 224  | 270  | 2.72157924688     |
| NM_002902    | RCN2     | 770  | 876  | 5.13662347722     |
| NM_002902    | RCN2     | 1148 | 1204 | 3.13662346967     |
| NM_002902    | RCN2     | 1243 | 1312 | 2.05248426783     |
| NM_002902    | RCN2     | 519  | 655  | 4.83706319536     |
| NM_002902    | RCN2     | 1033 | 1147 | 4.4585515721      |
| NM_002902    | RCN2     | 334  | 514  | 4.83706319536     |
| NM_002902    | RCN2     | 885  | 1022 | 3.72158597794     |
| NM_002902    | RCN2     | 1401 | 1667 | 4.4585515721      |
| NM_005901    | SMAD2    | 1072 | 1111 | 5.34631267742     |
| NM_005901    | SMAD2    | 456  | 494  | 6.35015652728     |
| NM_005901    | SMAD2    | 3232 | 3296 | 5.35015652728     |
| NM_005901    | SMAD2    | 993  | 1050 | 6.26619106821     |
| NM_005901    | SMAD2    | 6095 | 6183 | 5.3503302776      |
| NM_005901    | SMAD2    | 2190 | 2253 | 6.85115356893     |
| NM_005901    | SMAD2    | 832  | 880  | 6.34631267742     |
| NM_005901    | SMAD2    | 1715 | 1801 | 6.35033027759     |
| NM_005901    | SMAD2    | 307  | 353  | 6.34631267742     |
| NM_005901    | SMAD2    | 1415 | 1481 | 7.3503302776      |
| NM_005901    | SMAD2    | 6520 | 6584 | 5.35032354654     |
| NM_005271    | GLUD1    | 2280 | 2343 | 5.08348810714     |
| NM_005271    | GLUD1    | 1355 | 1414 | 4.08348810736     |
| NM_005271    | GLUD1    | 1618 | 1673 | 2.99934889798     |
| NM_005271    | GLUD1    | 2431 | 2502 | 3.08348809982     |
| NM_005271    | GLUD1    | 240  | 312  | 3.08348137631     |
| NM_005271    | GLUD1    | 1019 | 1076 | 4.08348810736     |
| NM_005271    | GLUD1    | 2077 | 2136 | 5.40541620225     |
| NM_005271    | GLUD1    | 1123 | 1338 | 7.17095094861     |
| NM_005271    | GLUD1    | 2183 | 2230 | 4.66845060809     |
| NM_005271    | GLUD1    | 447  | 565  | 4.66845060809     |
| NM_005271    | GLUD1    | 675  | 875  | 6.99037870297     |
| NM_005271    | GLUD1    | 1442 | 1616 | 6.66845060809     |
| NM_005271    | GLUD1    | 1821 | 1989 | 6.89084302942     |
| NM_005271    | GLUD1    | 1998 | 2072 | 4.08331435705     |



|           |        |      |      |               |
|-----------|--------|------|------|---------------|
| NM_005271 | GLUD1  | 1675 | 1801 | 5.89084302942 |
| NM_005271 | GLUD1  | 589  | 645  | 4.08348137631 |
| NM_005902 | SMAD3  | 3823 | 3891 | 7.16175708769 |
| NM_005902 | SMAD3  | 603  | 683  | 7.16175036418 |
| NM_005902 | SMAD3  | 1711 | 1796 | 7.16175685932 |
| NM_005902 | SMAD3  | 2454 | 2506 | 6.07761788585 |
| NM_005902 | SMAD3  | 3453 | 3479 | 6.16158334492 |
| NM_005902 | SMAD3  | 2009 | 2068 | 7.74654584564 |
| NM_005902 | SMAD3  | 5633 | 5737 | 7.74671959596 |
| NM_005907 | MAN1A1 | 4008 | 4086 | 4.15609724082 |
| NM_005907 | MAN1A1 | 4871 | 4918 | 2.1559234905  |
| NM_005907 | MAN1A1 | 4791 | 4836 | 3.1560970049  |
| NM_005907 | MAN1A1 | 3657 | 3711 | 3.74105950562 |
| NM_005907 | MAN1A1 | 548  | 699  | 6.24356008207 |
| NM_005907 | MAN1A1 | 4116 | 4217 | 5.32602224226 |
| NM_005907 | MAN1A1 | 4695 | 4786 | 4.4780253357  |
| NM_005907 | MAN1A1 | 3154 | 3357 | 6.74105974154 |
| NM_005907 | MAN1A1 | 4219 | 4289 | 4.4780253357  |
| NM_005907 | MAN1A1 | 1134 | 2221 | 10.068986577  |
| NM_005907 | MAN1A1 | 4937 | 5008 | 2.1559234905  |
| NM_005907 | MAN1A1 | 4577 | 4688 | 4.4780253357  |
| NM_005907 | MAN1A1 | 313  | 466  | 4.15609724082 |
| NM_005907 | MAN1A1 | 2227 | 2811 | 9.18952024235 |
| NM_005907 | MAN1A1 | 3750 | 3942 | 5.4780253357  |
| NM_005907 | MAN1A1 | 2843 | 3141 | 7.1102935512  |
| NM_005907 | MAN1A1 | 3369 | 3540 | 4.96345216287 |
| NM_005907 | MAN1A1 | 6    | 288  | 6.06298783642 |
| NM_005907 | MAN1A1 | 4294 | 4554 | 5.32602224226 |
| NM_005907 | MAN1A1 | 776  | 1133 | 6.79995343059 |
| NM_005908 | MANBA  | 1880 | 1925 | 5.86456916603 |
| NM_005908 | MANBA  | 1972 | 2041 | 6.53367087592 |
| NM_005908 | MANBA  | 2998 | 3038 | 5.94469077524 |
| NM_005908 | MANBA  | 2348 | 2394 | 6.94870837542 |
| NM_005908 | MANBA  | 2060 | 2116 | 6.94870837541 |
| NM_005908 | MANBA  | 1681 | 1787 | 8.11863337686 |
| NM_005908 | MANBA  | 1520 | 1591 | 7.2706364703  |
| NM_005908 | MANBA  | 2270 | 2338 | 6.53367087614 |
| NM_005908 | MANBA  | 624  | 696  | 4.9487081395  |
| NM_005908 | MANBA  | 1616 | 1665 | 4.9485346251  |
| NM_005908 | MANBA  | 2144 | 2264 | 8.11863337686 |
| NM_005908 | MANBA  | 2531 | 2577 | 4.94469077524 |
| NM_005908 | MANBA  | 485  | 553  | 4.94870837541 |
| NM_005908 | MANBA  | 2394 | 2464 | 5.94870837542 |
| NM_005908 | MANBA  | 699  | 817  | 6.53367087614 |
| NM_005908 | MANBA  | 2583 | 2674 | 6.53367087614 |
| NM_005908 | MANBA  | 2683 | 2801 | 5.94870837542 |
| NM_005908 | MANBA  | 1341 | 1488 | 8.2706364703  |
| NM_005908 | MANBA  | 831  | 1127 | 8.75606329747 |
| NM_005908 | MANBA  | 3046 | 3115 | 5.94870837519 |
| NM_005908 | MANBA  | 1128 | 1340 | 7.94870837542 |

|           |          |      |      |               |
|-----------|----------|------|------|---------------|
| NM_152426 | APOBEC3D | 150  | 250  | 10.6955487175 |
| NM_152420 | C9orf41  | 1964 | 2006 | 7.02000372554 |
| NM_032486 | DCTN5    | 3092 | 3174 | 5.598721369   |
| NM_032486 | DCTN5    | 1717 | 1763 | 6.59872113308 |
| NM_032486 | DCTN5    | 2129 | 2195 | 4.51458215962 |
| NM_032486 | DCTN5    | 2334 | 2425 | 4.59871463795 |
| NM_032486 | DCTN5    | 995  | 1108 | 5.59872136145 |
| NM_032486 | DCTN5    | 1499 | 1567 | 7.40607629106 |
| NM_032486 | DCTN5    | 174  | 214  | 4.59872136145 |
| NM_032486 | DCTN5    | 3266 | 3326 | 6.18368386217 |
| NM_032486 | DCTN5    | 843  | 926  | 5.598721369   |
| NM_032486 | DCTN5    | 288  | 387  | 7.76864637044 |
| NM_032486 | DCTN5    | 2600 | 2705 | 8.05815298764 |
| NM_032486 | DCTN5    | 448  | 573  | 7.76864637044 |
| NM_032486 | DCTN5    | 646  | 788  | 7.40607629106 |
| NM_032486 | DCTN5    | 1621 | 1699 | 6.09954466034 |
| NM_032485 | MCM8     | 3307 | 3353 | 4.99368668839 |
| NM_032485 | MCM8     | 872  | 951  | 4.99368019325 |
| NM_032485 | MCM8     | 1096 | 1147 | 4.98966932414 |
| NM_032485 | MCM8     | 1562 | 1612 | 5.99368691676 |
| NM_032485 | MCM8     | 964  | 1045 | 4.90954771492 |
| NM_032485 | MCM8     | 717  | 773  | 6.57847567471 |
| NM_032485 | MCM8     | 1674 | 1753 | 5.99368019325 |
| NM_032485 | MCM8     | 1463 | 1545 | 4.99368692431 |
| NM_032485 | MCM8     | 1991 | 2055 | 6.57463182486 |
| NM_032485 | MCM8     | 3369 | 3446 | 5.99368692431 |
| NM_032485 | MCM8     | 1208 | 1320 | 6.57864942503 |
| NM_032485 | MCM8     | 2279 | 2340 | 5.99368668839 |
| NM_032485 | MCM8     | 3468 | 3668 | 6.57864942503 |
| NM_032485 | MCM8     | 1858 | 1985 | 7.3156150192  |
| NM_032485 | MCM8     | 2486 | 2697 | 7.99368692431 |
| NM_032482 | DOT1L    | 1450 | 1535 | 6.85213152744 |
| NM_032482 | DOT1L    | 6387 | 6432 | 7.43709402816 |
| NM_032482 | DOT1L    | 1681 | 1715 | 5.85212479639 |
| NM_032482 | DOT1L    | 6569 | 6646 | 6.85212479639 |
| NM_032482 | DOT1L    | 4644 | 4718 | 6.85213129152 |
| NM_032482 | DOT1L    | 3456 | 3516 | 6.85213129152 |
| NM_032482 | DOT1L    | 4561 | 4607 | 6.85212479639 |
| NM_032482 | DOT1L    | 478  | 526  | 7.43709402061 |
| NM_032482 | DOT1L    | 4506 | 4559 | 6.85213129152 |
| NM_032482 | DOT1L    | 5316 | 5429 | 6.85213151989 |
| NM_032482 | DOT1L    | 6839 | 6888 | 6.84811392727 |
| NM_032482 | DOT1L    | 1821 | 1953 | 7.43709402061 |
| NM_032482 | DOT1L    | 4922 | 4986 | 7.43708729711 |
| NM_032482 | DOT1L    | 1955 | 2027 | 5.85213152744 |
| NM_032482 | DOT1L    | 4758 | 4839 | 5.85213152744 |
| NM_032482 | DOT1L    | 947  | 1005 | 5.84811392727 |
| NM_032482 | DOT1L    | 2255 | 2329 | 5.85212479639 |
| NM_032483 | PPAPDC1B | 125  | 204  | 9.63754311386 |
| NM_032483 | PPAPDC1B | 208  | 254  | 11.2225053789 |

|              |          |      |      |               |               |
|--------------|----------|------|------|---------------|---------------|
| NM_032483    | PPAPDC1B |      | 431  | 475           | 8.63352551391 |
| NM_001081676 | SCN3A    | 3055 | 3152 | 14.1306287564 |               |
| NM_001081676 | SCN3A    | 1094 | 1132 | 12.8086939305 |               |
| NM_005471    | GNPDA1   | 2003 | 2060 | 9.25500525236 |               |
| NM_005471    | GNPDA1   | 2197 | 2270 | 9.93307715748 |               |
| NM_005471    | GNPDA1   | 147  | 264  | 8.93307715747 |               |
| NM_005471    | GNPDA1   | 849  | 902  | 6.9290595573  |               |
| NM_005471    | GNPDA1   | 2073 | 2164 | 7.93307714993 |               |
| NM_005471    | GNPDA1   | 770  | 843  | 9.5180396582  |               |
| NM_005471    | GNPDA1   | 1940 | 1965 | 6.84893794809 |               |
| NM_005471    | GNPDA1   | 395  | 499  | 7.93307715748 |               |
| NM_001173539 | BANP     | 1863 | 1976 | 8.95336198081 |               |
| NM_001173539 | BANP     | 2130 | 2168 | 7.86922277142 |               |
| NM_001173539 | BANP     | 2029 | 2088 | 7.95335524975 |               |
| NM_001173539 | BANP     | 1073 | 1132 | 6.95336174489 |               |
| NM_001173539 | BANP     | 2090 | 2125 | 7.86922277142 |               |
| NM_001173539 | BANP     | 109  | 174  | 7.94934438063 |               |
| NM_031284    | ADPGK    | 1455 | 1579 | 9.71096140601 |               |
| NM_031284    | ADPGK    | 2172 | 2240 | 7.71096117009 |               |
| NM_031284    | ADPGK    | 1601 | 1654 | 6.71095467496 |               |
| NM_031284    | ADPGK    | 1250 | 1293 | 7.71078765569 |               |
| NM_031284    | ADPGK    | 1851 | 1921 | 6.62682219663 |               |
| NM_031284    | ADPGK    | 117  | 218  | 8.29592390673 |               |
| NM_031284    | ADPGK    | 811  | 942  | 9.29592390673 |               |
| NM_031284    | ADPGK    | 328  | 421  | 8.29592390673 |               |
| NM_031284    | ADPGK    | 527  | 620  | 8.71096140601 |               |
| NM_031284    | ADPGK    | 2261 | 2398 | 7.71096140601 |               |
| NM_031284    | ADPGK    | 953  | 1226 | 10.8808864075 |               |
| NM_031284    | ADPGK    | 2057 | 2105 | 7.71078765569 |               |
| NM_031287    | SF3B5    | 536  | 575  | 8.80104183881 |               |
| NM_031287    | SF3B5    | 462  | 512  | 6.4750961513  |               |
| NM_031287    | SF3B5    | 344  | 406  | 6.47911375147 |               |
| NM_031287    | SF3B5    | 413  | 453  | 8.06005865202 |               |
| NM_031287    | SF3B5    | 583  | 630  | 8.06390250188 |               |
| NM_031287    | SF3B5    | 124  | 186  | 6.4750961513  |               |
| NM_031287    | SF3B5    | 190  | 291  | 9.80104184636 |               |
| NM_031286    | SH3BGRL3 |      | 639  | 690           | 8.11955123102 |
| NM_031286    | SH3BGRL3 |      | 857  | 897           | 8.11955123102 |
| NM_031280    | MRPS15   | 760  | 809  | 3.47902083743 |               |
| NM_031280    | MRPS15   | 703  | 759  | 3.48303170655 |               |
| NM_031280    | MRPS15   | 371  | 486  | 5.06800093833 |               |
| NM_031283    | TCF7L1   | 2227 | 2269 | 11.88687152   |               |
| NM_031283    | TCF7L1   | 2348 | 2463 | 11.8868717557 |               |
| NM_032737    | LMNB2    | 4560 | 4627 | 7.30979724718 |               |
| NM_032737    | LMNB2    | 2217 | 2290 | 7.04676284135 |               |
| NM_032737    | LMNB2    | 860  | 920  | 4.64069553708 |               |
| NM_032737    | LMNB2    | 3363 | 3432 | 6.30979724718 |               |
| NM_032737    | LMNB2    | 4466 | 4549 | 7.04676284135 |               |
| NM_032737    | LMNB2    | 2174 | 2214 | 6.30979701126 |               |
| NM_032737    | LMNB2    | 142  | 220  | 5.72483474646 |               |

|              |          |      |      |                    |
|--------------|----------|------|------|--------------------|
| NM_032737    | LMNB2    | 2948 | 3005 | 6.30979724718      |
| NM_032737    | LMNB2    | 534  | 574  | 4.72483451054      |
| NM_032737    | LMNB2    | 2080 | 2142 | 5.64069553708      |
| NM_032737    | LMNB2    | 3618 | 3786 | 8.72483474646      |
| NM_032737    | LMNB2    | 730  | 841  | 6.30979724718      |
| NM_032737    | LMNB2    | 3497 | 3614 | 7.53218966852      |
| NM_032737    | LMNB2    | 2483 | 2556 | 5.72483451054      |
| NM_032737    | LMNB2    | 1729 | 1826 | 6.72483474646      |
| NM_032737    | LMNB2    | 4296 | 4401 | 7.30979724718      |
| NM_032737    | LMNB2    | 1434 | 1606 | 8.4252744646       |
| NM_032737    | LMNB2    | 589  | 730  | 6.30979724718      |
| NM_032737    | LMNB2    | 2600 | 2645 | 4.72483474624      |
| NM_032737    | LMNB2    | 1828 | 2046 | 8.9727622599       |
| NM_032737    | LMNB2    | 1017 | 1201 | 7.72483474646      |
| NM_032737    | LMNB2    | 2747 | 2916 | 8.4252744646       |
| NM_032737    | LMNB2    | 3014 | 3163 | 7.30979724718      |
| NM_032737    | LMNB2    | 302  | 526  | 7.72483474646      |
| NM_032737    | LMNB2    | 4029 | 4169 | 8.04676284135      |
| NM_032737    | LMNB2    | 3804 | 4013 | 8.04676284135      |
| NM_032730    | RTN4IP1  | 1201 | 1281 | 8.56228673394      |
| NM_032731    | TXNDC17  | 264  | 349  | 7.1764458862       |
| NM_032731    | TXNDC17  | 490  | 559  | 7.59148338526      |
| NM_032731    | TXNDC17  | 353  | 396  | 6.58746578531      |
| NM_001159596 | BIVM     | 2996 | 3029 | 5.90052882195      |
| NM_001159596 | BIVM     | 2013 | 2055 | 6.90453969107      |
| NM_001159596 | BIVM     | 1499 | 1595 | 5.90454642212      |
| NM_001159596 | BIVM     | 622  | 653  | 5.82040721274      |
| NM_001159596 | BIVM     | 2772 | 2862 | 7.48950892284      |
| NM_001159596 | BIVM     | 530  | 617  | 5.90454642211      |
| NM_183373    | C6orf145 |      | 1245 | 1300 4.71586510005 |
| NM_183373    | C6orf145 |      | 1157 | 1205 4.79983055912 |
| NM_183373    | C6orf145 |      | 780  | 882 6.38496681016  |
| NM_183373    | C6orf145 |      | 587  | 677 5.79999757838  |
| NM_183372    | NBPF11   | 2882 | 2936 | 8.40124885263      |
| NM_183372    | NBPF11   | 5011 | 5050 | 8.31710964325      |
| NM_183372    | NBPF11   | 3105 | 3203 | 9.40124885263      |
| NM_183372    | NBPF11   | 5120 | 5295 | 9.98621135335      |
| NM_183372    | NBPF11   | 4247 | 4373 | 8.40124885263      |
| NM_183372    | NBPF11   | 3451 | 3492 | 8.40124884508      |
| NM_183372    | NBPF11   | 4402 | 4512 | 8.98621134581      |
| NM_183372    | NBPF11   | 3226 | 3307 | 8.40124885263      |
| NM_183372    | NBPF11   | 2779 | 2863 | 7.39723125246      |
| NM_001039366 | ATP6V1E1 |      | 642  | 681 5.05208419193  |
| NM_001039366 | ATP6V1E1 |      | 1196 | 1281 5.05208419193 |
| NM_001039366 | ATP6V1E1 |      | 683  | 744 4.63687294234  |
| NM_001039366 | ATP6V1E1 |      | 446  | 584 6.05208419193  |
| NM_001039366 | ATP6V1E1 |      | 217  | 330 4.63704669265  |
| NM_001039366 | ATP6V1E1 |      | 75   | 200 5.63704669265  |
| NM_001039366 | ATP6V1E1 |      | 338  | 444 5.05208419193  |
| NM_001039366 | ATP6V1E1 |      | 785  | 1186 8.00628050232 |

|              |         |      |      |               |
|--------------|---------|------|------|---------------|
| NM_001006619 | MAPKAP1 | 815  | 905  | 6.55146575113 |
| NM_001006619 | MAPKAP1 | 1561 | 1632 | 7.87339384602 |
| NM_001006619 | MAPKAP1 | 1676 | 1740 | 6.55146575091 |
| NM_001006619 | MAPKAP1 | 748  | 799  | 7.46732654175 |
| NM_001006619 | MAPKAP1 | 1459 | 1528 | 6.55146551521 |
| NM_001006619 | MAPKAP1 | 242  | 292  | 6.55145902008 |
| NM_001006619 | MAPKAP1 | 538  | 637  | 6.55145902008 |
| NM_001111019 | NAV2    | 4266 | 4311 | 6.20062409362 |
| NM_001111019 | NAV2    | 2021 | 2079 | 7.86570820355 |
| NM_001005498 | RHBDF2  | 2378 | 2442 | 10.9190390558 |
| NM_001005498 | RHBDF2  | 3069 | 3117 | 8.11151038339 |
| NM_001005498 | RHBDF2  | 1290 | 1377 | 9.1116841337  |
| NM_001005498 | RHBDF2  | 2298 | 2361 | 9.11168413371 |
| NM_001005498 | RHBDF2  | 3203 | 3309 | 8.11168413371 |
| NM_001005498 | RHBDF2  | 2545 | 2648 | 9.69664663443 |
| NM_001005498 | RHBDF2  | 1656 | 1752 | 9.11168413371 |
| NM_001005498 | RHBDF2  | 2831 | 2930 | 9.69664663443 |
| NM_001005498 | RHBDF2  | 1929 | 2160 | 11.9190390558 |
| NM_001005498 | RHBDF2  | 974  | 1108 | 9.11168413371 |
| NM_001005498 | RHBDF2  | 796  | 868  | 9.1116841337  |
| NM_001005498 | RHBDF2  | 1561 | 1653 | 8.11168413371 |
| NM_001005498 | RHBDF2  | 15   | 233  | 9.69664663443 |
| NM_015436    | RCHY1   | 737  | 804  | 4.61064394959 |
| NM_015436    | RCHY1   | 2649 | 2683 | 4.61064394959 |
| NM_001204832 | ANO10   | 1435 | 1500 | 9.56165202525 |
| NM_001204832 | ANO10   | 1622 | 1702 | 9.56165202525 |
| NM_001204832 | ANO10   | 1052 | 1140 | 8.55763442509 |
| NM_001204832 | ANO10   | 895  | 1006 | 9.88358012015 |
| NM_001204832 | ANO10   | 1836 | 1943 | 7.56165178934 |
| NM_001204832 | ANO10   | 700  | 778  | 9.14661451843 |
| NM_015127    | CLCC1   | 447  | 490  | 7.99710185443 |
| NM_015127    | CLCC1   | 1018 | 1110 | 8.49627856309 |
| NM_015127    | CLCC1   | 1117 | 1186 | 8.08124106381 |
| NM_015127    | CLCC1   | 492  | 690  | 11.3542595582 |
| NM_015127    | CLCC1   | 3629 | 3684 | 6.49627183204 |
| NM_015127    | CLCC1   | 369  | 395  | 7.99710185443 |
| NM_015127    | CLCC1   | 1236 | 1329 | 9.08124106381 |
| NM_015127    | CLCC1   | 303  | 344  | 7.49610481277 |
| NM_015127    | CLCC1   | 1600 | 1665 | 6.49226096292 |
| NM_015127    | CLCC1   | 140  | 294  | 10.5837414043 |
| NM_015127    | CLCC1   | 750  | 998  | 10.5837414043 |
| NM_015124    | GRAMD4  | 2621 | 2676 | 7.05009369672 |
| NM_015124    | GRAMD4  | 4038 | 4100 | 7.13423267019 |
| NM_015124    | GRAMD4  | 222  | 295  | 8.13021530593 |
| NM_015124    | GRAMD4  | 667  | 732  | 8.05009369672 |
| NM_015124    | GRAMD4  | 1829 | 1943 | 9.94158782816 |
| NM_015124    | GRAMD4  | 4118 | 4226 | 8.71919539928 |
| NM_015125    | CIC     | 4061 | 4119 | 7.32040604075 |
| NM_015125    | CIC     | 4125 | 4165 | 7.23626683137 |
| NM_015125    | CIC     | 4361 | 4405 | 7.32023229044 |

|              |          |      |      |               |               |
|--------------|----------|------|------|---------------|---------------|
| NM_015125    | CIC      | 101  | 177  | 9.64233413564 |               |
| NM_015125    | CIC      | 4184 | 4266 | 8.32040580483 |               |
| NM_015125    | CIC      | 953  | 1014 | 9.9013509413  |               |
| NM_015125    | CIC      | 3110 | 3168 | 8.3203993097  |               |
| NM_015125    | CIC      | 3313 | 3361 | 7.32023229044 |               |
| NM_015125    | CIC      | 2200 | 2259 | 8.32040604075 |               |
| NM_015125    | CIC      | 492  | 581  | 7.3204060332  |               |
| NM_015125    | CIC      | 2070 | 2131 | 8.32040580483 |               |
| NM_015125    | CIC      | 2632 | 2694 | 7.32040580483 |               |
| NM_015125    | CIC      | 1564 | 1619 | 7.31638844058 |               |
| NM_015125    | CIC      | 4887 | 4952 | 8.9013509413  |               |
| NM_015125    | CIC      | 705  | 754  | 7.31638844058 |               |
| NM_015125    | CIC      | 1638 | 1709 | 8.32040604075 |               |
| NM_015125    | CIC      | 581  | 647  | 8.32040604075 |               |
| NM_015125    | CIC      | 2881 | 3044 | 8.90536854147 |               |
| NM_015125    | CIC      | 1193 | 1238 | 7.23626683137 |               |
| NM_015125    | CIC      | 1460 | 1551 | 8.90536830556 |               |
| NM_015125    | CIC      | 1311 | 1448 | 8.90536854147 |               |
| NM_015125    | CIC      | 242  | 398  | 9.32040604075 |               |
| NM_033280    | SEC11C   | 335  | 369  | 2.66819726106 |               |
| NM_033280    | SEC11C   | 632  | 696  | 4.25298624738 |               |
| NM_033280    | SEC11C   | 574  | 629  | 4.25315326664 |               |
| NM_033280    | SEC11C   | 396  | 436  | 2.6641798968  |               |
| NM_033280    | SEC11C   | 440  | 517  | 2.66819749697 |               |
| NM_033280    | SEC11C   | 84   | 230  | 6.12762911561 |               |
| NM_033286    | C15orf23 |      | 802  | 898           | 5.6115640475  |
| NM_033286    | C15orf23 |      | 361  | 394           | 5.60754644733 |
| NM_033286    | C15orf23 |      | 494  | 574           | 5.02642779646 |
| NM_033286    | C15orf23 |      | 686  | 783           | 5.02660154678 |
| NM_003262    | SEC62    | 1451 | 1498 | 5.1314930033  |               |
| NM_003262    | SEC62    | 2802 | 2856 | 2.80939116565 |               |
| NM_003262    | SEC62    | 1001 | 1098 | 2.80956491596 |               |
| NM_003262    | SEC62    | 1926 | 1979 | 3.80956491574 |               |
| NM_003262    | SEC62    | 618  | 673  | 2.80956491596 |               |
| NM_003262    | SEC62    | 1801 | 1921 | 5.39452741668 |               |
| NM_003262    | SEC62    | 2417 | 2464 | 2.72542570658 |               |
| NM_003262    | SEC62    | 1101 | 1177 | 3.80956491596 |               |
| NM_003262    | SEC62    | 549  | 606  | 3.80956491596 |               |
| NM_003262    | SEC62    | 3057 | 3110 | 3.80956491596 |               |
| NM_003262    | SEC62    | 2332 | 2364 | 2.80554731579 |               |
| NM_003262    | SEC62    | 676  | 810  | 6.89702775721 |               |
| NM_003262    | SEC62    | 51   | 141  | 2.80956491596 |               |
| NM_003262    | SEC62    | 1216 | 1360 | 5.97948991741 |               |
| NM_003262    | SEC62    | 5633 | 5694 | 3.80955818491 |               |
| NM_003262    | SEC62    | 812  | 977  | 6.61691983802 |               |
| NM_003262    | SEC62    | 143  | 297  | 5.97948991741 |               |
| NM_001031696 | PLD3     | 825  | 898  | 8.61666954774 |               |
| NM_001031696 | PLD3     | 910  | 1173 | 10.8896880421 |               |
| NM_001031696 | PLD3     | 1182 | 1886 | 12.6166695477 |               |
| NM_001031696 | PLD3     | 1892 | 2077 | 9.61666954774 |               |

|              |          |      |      |                    |
|--------------|----------|------|------|--------------------|
| NM_001031696 | PLD3     | 330  | 824  | 11.8130667605      |
| NM_001031698 | PRPF40B  | 2605 | 2659 | 7.76927925571      |
| NM_003618    | MAP4K3   | 583  | 672  | 6.72789078396      |
| NM_181836    | TMED7    | 2710 | 2760 | 6.47483886046      |
| NM_181836    | TMED7    | 571  | 673  | 9.17527881452      |
| NM_181836    | TMED7    | 3200 | 3268 | 6.47466534606      |
| NM_181836    | TMED7    | 1987 | 2036 | 5.47466534606      |
| NM_181836    | TMED7    | 1174 | 1229 | 6.47483909637      |
| NM_181836    | TMED7    | 2357 | 2478 | 6.47483909638      |
| NM_181836    | TMED7    | 2939 | 2975 | 5.39069988699      |
| NM_181836    | TMED7    | 3708 | 3757 | 7.05578399692      |
| NM_181836    | TMED7    | 3486 | 3584 | 8.28219401843      |
| NM_181836    | TMED7    | 2210 | 2265 | 7.05578399692      |
| NM_181836    | TMED7    | 2042 | 2127 | 8.0598015971       |
| NM_181836    | TMED7    | 449  | 571  | 8.79676719126      |
| NM_181836    | TMED7    | 2994 | 3092 | 6.47483909615      |
| NM_181836    | TMED7    | 1231 | 1385 | 9.0598015971       |
| NM_181836    | TMED7    | 674  | 922  | 10.1752788145      |
| NM_181836    | TMED7    | 142  | 316  | 8.0598015971       |
| NM_181836    | TMED7    | 923  | 1164 | 9.72276660982      |
| NM_052905    | FMNL2    | 2515 | 2586 | 5.0521327093       |
| NM_052905    | FMNL2    | 5073 | 5118 | 3.96799349992      |
| NM_052905    | FMNL2    | 590  | 647  | 2.96799349992      |
| NM_052905    | FMNL2    | 1391 | 1453 | 4.05212597825      |
| NM_052905    | FMNL2    | 656  | 708  | 4.05212597825      |
| NM_052905    | FMNL2    | 4846 | 4941 | 3.0521327093       |
| NM_052905    | FMNL2    | 1466 | 1543 | 3.05212597825      |
| NM_052905    | FMNL2    | 4289 | 4330 | 4.05213270175      |
| NM_052905    | FMNL2    | 756  | 854  | 5.05213270175      |
| NM_052905    | FMNL2    | 5320 | 5399 | 4.0521327093       |
| NM_052905    | FMNL2    | 1102 | 1160 | 3.05195895898      |
| NM_052905    | FMNL2    | 1232 | 1309 | 4.0521327093       |
| NM_052905    | FMNL2    | 3633 | 3692 | 4.63709521002      |
| NM_052905    | FMNL2    | 1554 | 1682 | 4.0521327093       |
| NM_052905    | FMNL2    | 4744 | 4837 | 4.63708847897      |
| NM_052905    | FMNL2    | 4660 | 4739 | 3.04811510913      |
| NM_052905    | FMNL2    | 2182 | 2268 | 3.05213270175      |
| NM_176806    | MOCS2    | 1065 | 1153 | 7.3445120415       |
| NM_176806    | MOCS2    | 129  | 193  | 7.34852940575      |
| NM_052901    | SLC25A25 |      | 2340 | 2375 4.32581924365 |
| NM_052901    | SLC25A25 |      | 1444 | 1495 4.32983683627 |
| NM_052901    | SLC25A25 |      | 266  | 374 5.91479261349  |
| NM_003615    | SLC4A7   | 5631 | 5671 | 5.69427209509      |
| NM_003615    | SLC4A7   | 428  | 510  | 6.69828968771      |
| NM_003615    | SLC4A7   | 2014 | 2080 | 6.69828296421      |
| NM_003615    | SLC4A7   | 3554 | 3597 | 6.69828969526      |
| NM_003615    | SLC4A7   | 4146 | 4231 | 6.69828968771      |
| NM_003615    | SLC4A7   | 3408 | 3457 | 6.69828296421      |
| NM_003615    | SLC4A7   | 5867 | 5945 | 5.69828968771      |
| NM_003615    | SLC4A7   | 5051 | 5124 | 6.69828969526      |

|           |        |       |       |               |
|-----------|--------|-------|-------|---------------|
| NM_003615 | SLC4A7 | 3273  | 3328  | 7.28325219598 |
| NM_003615 | SLC4A7 | 3163  | 3213  | 7.61415048588 |
| NM_003615 | SLC4A7 | 1889  | 1990  | 8.02021779015 |
| NM_003615 | SLC4A7 | 734   | 785   | 7.28325219598 |
| NM_003615 | SLC4A7 | 2265  | 2412  | 7.69828969526 |
| NM_003615 | SLC4A7 | 2084  | 2199  | 7.28325219599 |
| NM_003615 | SLC4A7 | 3822  | 3895  | 6.69828945935 |
| NM_003615 | SLC4A7 | 3930  | 4021  | 5.69828969526 |
| NM_003615 | SLC4A7 | 2620  | 2677  | 6.69828969504 |
| NM_181838 | UBE2D2 | 612   | 643   | 3.04495386276 |
| NM_181838 | UBE2D2 | 811   | 854   | 4.04495409867 |
| NM_181838 | UBE2D2 | 1903  | 1950  | 3.04494736762 |
| NM_181838 | UBE2D2 | 481   | 550   | 3.04495409113 |
| NM_181838 | UBE2D2 | 1080  | 1183  | 6.36688219356 |
| NM_170606 | MLL3   | 7083  | 7168  | 8.11256389111 |
| NM_170606 | MLL3   | 14829 | 14898 | 6.52759465933 |
| NM_170606 | MLL3   | 13935 | 14001 | 8.11255716005 |
| NM_170606 | MLL3   | 12600 | 12710 | 8.84952948527 |
| NM_170606 | MLL3   | 15645 | 15715 | 7.52759465933 |
| NM_170606 | MLL3   | 8192  | 8249  | 6.52358379021 |
| NM_170606 | MLL3   | 12441 | 12491 | 8.11256389111 |
| NM_170606 | MLL3   | 10520 | 10566 | 6.52760115447 |
| NM_170606 | MLL3   | 16700 | 16783 | 7.52760139039 |
| NM_170606 | MLL3   | 8564  | 8655  | 7.52760115447 |
| NM_170606 | MLL3   | 4204  | 4254  | 6.443462181   |
| NM_170606 | MLL3   | 9090  | 9152  | 7.52759465933 |
| NM_170606 | MLL3   | 11959 | 12045 | 6.52760139039 |
| NM_170606 | MLL3   | 1244  | 1303  | 6.52358379021 |
| NM_170606 | MLL3   | 1173  | 1211  | 7.52759465933 |
| NM_170606 | MLL3   | 10319 | 10437 | 7.52760115447 |
| NM_170606 | MLL3   | 13439 | 13476 | 7.52760115447 |
| NM_170606 | MLL3   | 3603  | 3719  | 8.52760139039 |
| NM_170606 | MLL3   | 11757 | 11796 | 6.52742764007 |
| NM_170606 | MLL3   | 3047  | 3138  | 7.52760139039 |
| NM_170606 | MLL3   | 6680  | 6739  | 7.52742764007 |
| NM_170606 | MLL3   | 12817 | 12891 | 8.11239014079 |
| NM_170606 | MLL3   | 9265  | 9328  | 8.11256388356 |
| NM_170606 | MLL3   | 7759  | 7810  | 6.52358379021 |
| NM_170606 | MLL3   | 4435  | 4514  | 7.52742764007 |
| NM_170606 | MLL3   | 6792  | 6871  | 7.52759465933 |
| NM_170606 | MLL3   | 16494 | 16586 | 8.52760138284 |
| NM_170606 | MLL3   | 16282 | 16440 | 8.52760139039 |
| NM_006622 | PLK2   | 2224  | 2274  | 7.83996791574 |
| NM_006622 | PLK2   | 1171  | 1223  | 8.25517915778 |
| NM_006622 | PLK2   | 1853  | 1919  | 7.25116156516 |
| NM_181762 | UBE2A  | 687   | 757   | 9.16455871533 |
| NM_181762 | UBE2A  | 569   | 627   | 8.74968823531 |
| NM_181762 | UBE2A  | 405   | 474   | 9.48666056053 |
| NM_181762 | UBE2A  | 1346  | 1394  | 7.16455871533 |
| NM_181762 | UBE2A  | 337   | 397   | 8.16472573459 |



|              |         |       |       |               |
|--------------|---------|-------|-------|---------------|
| NM_001039211 | ATAD3C  | 1745  | 1792  | 10.2832608631 |
| NM_001039211 | ATAD3C  | 1646  | 1738  | 9.27941701327 |
| NM_001039211 | ATAD3C  | 1527  | 1606  | 10.2834346132 |
| NM_001378    | DYNC1I2 | 689   | 736   | 3.38798883929 |
| NM_001378    | DYNC1I2 | 736   | 805   | 5.05709054917 |
| NM_001378    | DYNC1I2 | 1545  | 1609  | 4.38798883929 |
| NM_001378    | DYNC1I2 | 2160  | 2232  | 3.47195429835 |
| NM_001378    | DYNC1I2 | 1908  | 2035  | 3.47212804867 |
| NM_001378    | DYNC1I2 | 1654  | 1791  | 7.05709054939 |
| NM_001378    | DYNC1I2 | 1074  | 1189  | 5.79405614356 |
| NM_001378    | DYNC1I2 | 822   | 929   | 3.47212804867 |
| NM_001378    | DYNC1I2 | 1851  | 1904  | 4.4681104485  |
| NM_001379    | DNMT1   | 2779  | 2822  | 6.75066857398 |
| NM_001379    | DNMT1   | 1327  | 1400  | 7.48763440407 |
| NM_001379    | DNMT1   | 4404  | 4457  | 7.48763440407 |
| NM_001379    | DNMT1   | 2596  | 2667  | 7.48763440407 |
| NM_001379    | DNMT1   | 5196  | 5308  | 7.16570630918 |
| NM_001379    | DNMT1   | 4702  | 4744  | 5.16553255886 |
| NM_001379    | DNMT1   | 4201  | 4277  | 6.7506688099  |
| NM_001379    | DNMT1   | 3455  | 3504  | 6.16168870901 |
| NM_001379    | DNMT1   | 4549  | 4610  | 6.16570630163 |
| NM_001379    | DNMT1   | 1233  | 1281  | 5.0815670998  |
| NM_001379    | DNMT1   | 3816  | 3855  | 6.75049505958 |
| NM_001379    | DNMT1   | 1443  | 1504  | 5.16553255886 |
| NM_001379    | DNMT1   | 1701  | 1960  | 8.33563131062 |
| NM_001379    | DNMT1   | 437   | 506   | 6.16168870901 |
| NM_001379    | DNMT1   | 5014  | 5180  | 8.16570630918 |
| NM_001379    | DNMT1   | 3859  | 4024  | 7.48763440407 |
| NM_001379    | DNMT1   | 2134  | 2239  | 7.16570630918 |
| NM_001379    | DNMT1   | 2831  | 2926  | 6.16570630918 |
| NM_001379    | DNMT1   | 3063  | 3287  | 7.97306123124 |
| NM_001379    | DNMT1   | 2347  | 2537  | 7.7506688099  |
| NM_001379    | DNMT1   | 3534  | 3785  | 7.48763440407 |
| NM_001379    | DNMT1   | 1559  | 1657  | 7.97306123124 |
| NM_001379    | DNMT1   | 4462  | 4527  | 5.16553255886 |
| NM_001379    | DNMT1   | 2053  | 2134  | 5.16570630918 |
| NM_001379    | DNMT1   | 258   | 338   | 5.16570630918 |
| NM_001376    | DYNC1H1 | 5046  | 5107  | 7.47791372972 |
| NM_001376    | DYNC1H1 | 3018  | 3090  | 6.79984182461 |
| NM_001376    | DYNC1H1 | 10544 | 10650 | 7.06287623044 |
| NM_001376    | DYNC1H1 | 12030 | 12113 | 7.47791372972 |
| NM_001376    | DYNC1H1 | 10289 | 10357 | 7.06287623044 |
| NM_001376    | DYNC1H1 | 2426  | 2486  | 6.06287623044 |
| NM_001376    | DYNC1H1 | 3823  | 3875  | 6.47791372972 |
| NM_001376    | DYNC1H1 | 6301  | 6353  | 5.47791372972 |
| NM_001376    | DYNC1H1 | 557   | 628   | 4.47791372972 |
| NM_001376    | DYNC1H1 | 1047  | 1085  | 4.39377452034 |
| NM_001376    | DYNC1H1 | 1898  | 1963  | 6.4779137295  |
| NM_001376    | DYNC1H1 | 12703 | 12743 | 6.06286949939 |
| NM_001376    | DYNC1H1 | 12595 | 12691 | 6.47791372972 |

|           |         |       |       |               |
|-----------|---------|-------|-------|---------------|
| NM_001376 | DYNC1H1 | 4908  | 5042  | 6.79984182461 |
| NM_001376 | DYNC1H1 | 13874 | 13939 | 4.4779134938  |
| NM_001376 | DYNC1H1 | 5484  | 5528  | 4.39377452034 |
| NM_001376 | DYNC1H1 | 205   | 265   | 6.06287623044 |
| NM_001376 | DYNC1H1 | 9969  | 10066 | 7.64783873116 |
| NM_001376 | DYNC1H1 | 7954  | 8001  | 5.47791372972 |
| NM_001376 | DYNC1H1 | 12993 | 13059 | 4.47791372972 |
| NM_001376 | DYNC1H1 | 11988 | 12030 | 4.4779137295  |
| NM_001376 | DYNC1H1 | 2486  | 2560  | 5.47791372972 |
| NM_001376 | DYNC1H1 | 821   | 861   | 4.39377452034 |
| NM_001376 | DYNC1H1 | 5647  | 5725  | 7.06287623044 |
| NM_001376 | DYNC1H1 | 2865  | 3018  | 8.28526865178 |
| NM_001376 | DYNC1H1 | 5209  | 5353  | 7.93734534836 |
| NM_001376 | DYNC1H1 | 10104 | 10152 | 6.06270248012 |
| NM_001376 | DYNC1H1 | 7632  | 7772  | 7.47791372972 |
| NM_001376 | DYNC1H1 | 7486  | 7629  | 6.79984182461 |
| NM_001376 | DYNC1H1 | 5368  | 5403  | 6.06287622289 |
| NM_001376 | DYNC1H1 | 706   | 800   | 7.79984182461 |
| NM_001376 | DYNC1H1 | 12743 | 12890 | 7.47791372972 |
| NM_001376 | DYNC1H1 | 13685 | 13730 | 4.47389612955 |
| NM_001376 | DYNC1H1 | 4005  | 4100  | 6.47791372972 |
| NM_001376 | DYNC1H1 | 10359 | 10520 | 6.79984182461 |
| NM_001376 | DYNC1H1 | 3880  | 3963  | 6.47791372972 |
| NM_001376 | DYNC1H1 | 2147  | 2288  | 6.79984182461 |
| NM_001376 | DYNC1H1 | 8352  | 8481  | 6.47791372972 |
| NM_001376 | DYNC1H1 | 5528  | 5627  | 7.06287623044 |
| NM_001376 | DYNC1H1 | 7422  | 7462  | 5.97873702106 |
| NM_001376 | DYNC1H1 | 9423  | 9539  | 7.79984182461 |
| NM_001376 | DYNC1H1 | 7171  | 7342  | 7.64783873116 |
| NM_001376 | DYNC1H1 | 13973 | 14053 | 6.06287623044 |
| NM_001376 | DYNC1H1 | 12267 | 12503 | 8.17835344786 |
| NM_001376 | DYNC1H1 | 6094  | 6278  | 7.64783873116 |
| NM_001376 | DYNC1H1 | 1733  | 1884  | 7.28526865178 |
| NM_001376 | DYNC1H1 | 6357  | 6416  | 6.06287623022 |
| NM_001376 | DYNC1H1 | 11626 | 11749 | 6.79984182461 |
| NM_001376 | DYNC1H1 | 10653 | 10765 | 7.64783873116 |
| NM_001376 | DYNC1H1 | 8829  | 8934  | 8.06287623044 |
| NM_001376 | DYNC1H1 | 354   | 442   | 6.47791372972 |
| NM_001376 | DYNC1H1 | 10795 | 10887 | 6.79984182461 |
| NM_001376 | DYNC1H1 | 10902 | 11142 | 8.64783873116 |
| NM_001376 | DYNC1H1 | 8934  | 9050  | 7.28526865178 |
| NM_001376 | DYNC1H1 | 13589 | 13674 | 6.06287623044 |
| NM_001376 | DYNC1H1 | 9575  | 9966  | 8.17835344786 |
| NM_001376 | DYNC1H1 | 13163 | 13350 | 7.28526865178 |
| NM_001376 | DYNC1H1 | 1621  | 1719  | 7.06287623044 |
| NM_001376 | DYNC1H1 | 1964  | 2023  | 4.47791372971 |
| NM_001376 | DYNC1H1 | 6941  | 7132  | 7.64783873116 |
| NM_001376 | DYNC1H1 | 883   | 1030  | 8.06287623044 |
| NM_001376 | DYNC1H1 | 6417  | 6492  | 7.06287623044 |
| NM_001376 | DYNC1H1 | 13415 | 13497 | 6.47791372972 |

|           |         |       |       |               |
|-----------|---------|-------|-------|---------------|
| NM_001376 | DYNC1H1 | 1122  | 1270  | 8.06287623044 |
| NM_001376 | DYNC1H1 | 1271  | 1528  | 7.64783873116 |
| NM_001376 | DYNC1H1 | 11767 | 11974 | 7.79984182461 |
| NM_001376 | DYNC1H1 | 11143 | 11277 | 7.64783873116 |
| NM_001376 | DYNC1H1 | 4236  | 4808  | 10.3848043253 |
| NM_001376 | DYNC1H1 | 2565  | 2853  | 9.00147568578 |
| NM_001376 | DYNC1H1 | 4117  | 4235  | 6.47791372972 |
| NM_001376 | DYNC1H1 | 7843  | 7929  | 5.47791372972 |
| NM_001376 | DYNC1H1 | 12519 | 12594 | 6.06287623044 |
| NM_001376 | DYNC1H1 | 8557  | 8766  | 8.72584124316 |
| NM_001376 | DYNC1H1 | 9054  | 9231  | 9.06287623044 |
| NM_001376 | DYNC1H1 | 2313  | 2422  | 6.47791372972 |
| NM_001376 | DYNC1H1 | 9279  | 9420  | 6.47791372972 |
| NM_001376 | DYNC1H1 | 6813  | 6922  | 7.06287623044 |
| NM_001376 | DYNC1H1 | 11294 | 11623 | 8.79984182461 |
| NM_001376 | DYNC1H1 | 8037  | 8243  | 8.47791372972 |
| NM_001376 | DYNC1H1 | 5125  | 5209  | 6.47791372972 |
| NM_001376 | DYNC1H1 | 2027  | 2144  | 7.06287623044 |
| NM_001376 | DYNC1H1 | 14090 | 14264 | 7.28526865178 |
| NM_001376 | DYNC1H1 | 6492  | 6802  | 8.28526865178 |
| NM_001376 | DYNC1H1 | 10157 | 10244 | 6.47791372972 |
| NM_001376 | DYNC1H1 | 641   | 699   | 4.47791372217 |
| NM_001376 | DYNC1H1 | 5752  | 6083  | 8.8702311525  |
| NM_001376 | DYNC1H1 | 3177  | 3606  | 9.72584124316 |
| NM_001376 | DYNC1H1 | 3609  | 3769  | 8.06287623044 |
| NM_001375 | DNASE2  | 214   | 244   | 9.92814179844 |
| NM_001375 | DNASE2  | 904   | 998   | 11.2540874935 |
| NM_001375 | DNASE2  | 590   | 668   | 9.93215939861 |
| NM_001375 | DNASE2  | 278   | 345   | 8.93215939861 |
| NM_001375 | DNASE2  | 1390  | 1480  | 11.2540874935 |
| NM_001375 | DNASE2  | 506   | 536   | 9.92814179844 |
| NM_001375 | DNASE2  | 1534  | 1577  | 9.93198564829 |
| NM_001375 | DNASE2  | 427   | 490   | 9.93215266756 |
| NM_001375 | DNASE2  | 1877  | 1940  | 9.93215939861 |
| NM_001375 | DNASE2  | 789   | 888   | 10.9321593986 |
| NM_001375 | DNASE2  | 1716  | 1772  | 8.93198564829 |
| NM_001375 | DNASE2  | 1051  | 1101  | 8.93215939106 |
| NM_022068 | PIEZ02  | 2868  | 2939  | 7.71985467757 |
| NM_022068 | PIEZ02  | 944   | 1030  | 6.71986140862 |
| NM_022068 | PIEZ02  | 8092  | 8131  | 6.71584380845 |
| NM_022068 | PIEZ02  | 3826  | 3891  | 8.30482390934 |
| NM_022068 | PIEZ02  | 273   | 350   | 7.71986140862 |
| NM_022068 | PIEZ02  | 3466  | 3501  | 7.71584380845 |
| NM_022068 | PIEZ02  | 408   | 452   | 8.22068469996 |
| NM_022068 | PIEZ02  | 6270  | 6313  | 8.30465015903 |
| NM_022068 | PIEZ02  | 4228  | 4295  | 7.71985467757 |
| NM_022068 | PIEZ02  | 2970  | 3023  | 6.63572219924 |
| NM_022068 | PIEZ02  | 8529  | 8579  | 6.71584380845 |
| NM_022068 | PIEZ02  | 2577  | 2640  | 7.71986140862 |
| NM_022068 | PIEZ02  | 4038  | 4119  | 8.30482367342 |

|              |        |      |      |               |
|--------------|--------|------|------|---------------|
| NM_022068    | PIEZ02 | 6965 | 7033 | 9.30482367342 |
| NM_022068    | PIEZ02 | 3024 | 3053 | 6.7196876583  |
| NM_022068    | PIEZ02 | 1401 | 1445 | 7.63572219924 |
| NM_022068    | PIEZ02 | 4174 | 4228 | 6.7198611727  |
| NM_022068    | PIEZ02 | 3061 | 3239 | 10.0417895035 |
| NM_022068    | PIEZ02 | 5938 | 6031 | 6.71985467757 |
| NM_022068    | PIEZ02 | 9229 | 9323 | 6.71986140107 |
| NM_022068    | PIEZ02 | 7190 | 7247 | 6.7196876583  |
| NM_022068    | PIEZ02 | 9072 | 9125 | 6.63572219924 |
| NM_022068    | PIEZ02 | 816  | 941  | 9.04178950351 |
| NM_022068    | PIEZ02 | 524  | 634  | 9.30482390934 |
| NM_022068    | PIEZ02 | 1710 | 1781 | 8.30482390912 |
| NM_022068    | PIEZ02 | 1098 | 1282 | 9.71986140862 |
| NM_022068    | PIEZ02 | 2425 | 2544 | 9.04178950351 |
| NM_022065    | THADA  | 3807 | 3861 | 9.40406228442 |
| NM_022065    | THADA  | 4944 | 5006 | 8.82294363355 |
| NM_022065    | THADA  | 2887 | 2926 | 7.73897817449 |
| NM_022065    | THADA  | 1297 | 1325 | 7.73897817449 |
| NM_022065    | THADA  | 3923 | 3976 | 8.82294363355 |
| NM_022065    | THADA  | 1433 | 1490 | 9.82311065282 |
| NM_022065    | THADA  | 1197 | 1232 | 7.73897817449 |
| NM_022065    | THADA  | 5692 | 5764 | 7.8190997837  |
| NM_022065    | THADA  | 797  | 901  | 9.40807964868 |
| NM_022065    | THADA  | 989  | 1072 | 9.82311737632 |
| NM_022064    | RNF123 | 3387 | 3446 | 6.84727151001 |
| NM_022064    | RNF123 | 433  | 495  | 6.85111535986 |
| NM_022066    | UBE20  | 1981 | 2051 | 6.02615977008 |
| NM_022066    | UBE20  | 2981 | 3045 | 6.03017736271 |
| NM_022066    | UBE20  | 2540 | 2613 | 5.94603816087 |
| NM_022066    | UBE20  | 2657 | 2727 | 6.03000361994 |
| NM_022061    | MRPL17 | 268  | 309  | 5.3507629384  |
| NM_001129995 | KCTD15 | 3280 | 3330 | 9.02224492768 |
| NM_001129995 | KCTD15 | 1695 | 1741 | 8.0262557968  |
| NM_001129995 | KCTD15 | 623  | 683  | 8.02608877753 |
| NM_001129995 | KCTD15 | 2093 | 2159 | 9.6072074284  |
| NM_001129995 | KCTD15 | 2277 | 2337 | 8.02224492768 |
| NM_021267    | CERS1  | 566  | 657  | 12.4025555233 |
| NM_021267    | CERS1  | 854  | 917  | 10.8175930226 |
| NM_021267    | CERS1  | 1746 | 1816 | 12.3985379232 |
| NM_021267    | CERS1  | 448  | 509  | 11.8175930226 |
| NM_021267    | CERS1  | 388  | 444  | 11.8135754225 |
| NM_021267    | CERS1  | 1009 | 1073 | 10.8175930226 |
| NM_021267    | CERS1  | 738  | 834  | 13.1393473672 |
| NM_012479    | YWHAG  | 956  | 1032 | 3.83692062884 |
| NM_012479    | YWHAG  | 2248 | 2309 | 5.42188312201 |
| NM_012479    | YWHAG  | 277  | 382  | 7.42188312956 |
| NM_012479    | YWHAG  | 82   | 150  | 6.15884872373 |
| NM_012479    | YWHAG  | 709  | 802  | 7.29635224748 |
| NM_012479    | YWHAG  | 3211 | 3269 | 4.83692062884 |
| NM_012479    | YWHAG  | 205  | 267  | 4.83692062884 |

|           |       |      |      |               |
|-----------|-------|------|------|---------------|
| NM_012479 | YWHAG | 3342 | 3437 | 6.83692062884 |
| NM_012479 | YWHAG | 613  | 671  | 3.83290302867 |
| NM_012479 | YWHAG | 1713 | 1768 | 4.83674687852 |
| NM_012479 | YWHAG | 2580 | 2697 | 6.42188312956 |
| NM_012479 | YWHAG | 3109 | 3188 | 4.83692062129 |
| NM_012479 | YWHAG | 391  | 612  | 7.42188312956 |
| NM_012479 | YWHAG | 1812 | 1882 | 5.83692062884 |
| NM_012479 | YWHAG | 1921 | 2082 | 6.42188312956 |
| NM_012479 | YWHAG | 824  | 946  | 4.83692062884 |
| NM_012479 | YWHAG | 1580 | 1706 | 6.42188312956 |
| NM_012479 | YWHAG | 2971 | 3071 | 6.42188312956 |
| NM_012479 | YWHAG | 2357 | 2575 | 7.53736034698 |
| NM_012479 | YWHAG | 3459 | 3670 | 6.15884872373 |
| NM_012479 | YWHAG | 2163 | 2247 | 4.83692062884 |
| NM_012479 | YWHAG | 1069 | 1553 | 9.3604825849  |
| NM_012478 | WBP2  | 1601 | 1648 | 3.76295466162 |
| NM_012478 | WBP2  | 1426 | 1484 | 4.75893706144 |
| NM_012478 | WBP2  | 1182 | 1242 | 4.76295466162 |
| NM_012478 | WBP2  | 1765 | 1845 | 5.76295466162 |
| NM_012478 | WBP2  | 1023 | 1072 | 5.34791716234 |
| NM_012478 | WBP2  | 477  | 528  | 4.75893706144 |
| NM_012478 | WBP2  | 135  | 246  | 6.34791716234 |
| NM_012478 | WBP2  | 336  | 443  | 6.34791716234 |
| NM_012470 | TNP03 | 1508 | 1611 | 5.86790813944 |
| NM_012470 | TNP03 | 1425 | 1470 | 7.86790813922 |
| NM_012470 | TNP03 | 2608 | 2666 | 5.86790813943 |
| NM_012470 | TNP03 | 651  | 716  | 6.86790813189 |
| NM_012470 | TNP03 | 1804 | 1871 | 5.86790140839 |
| NM_012470 | TNP03 | 2947 | 3007 | 7.45287063261 |
| NM_012470 | TNP03 | 539  | 585  | 5.86790813922 |
| NM_012470 | TNP03 | 2811 | 2895 | 7.45287064016 |
| NM_012470 | TNP03 | 2540 | 2598 | 6.86773438912 |
| NM_012470 | TNP03 | 1306 | 1348 | 5.86389053927 |
| NM_012470 | TNP03 | 810  | 863  | 6.86790790352 |
| NM_012470 | TNP03 | 2259 | 2303 | 6.86389053927 |
| NM_012470 | TNP03 | 1973 | 2206 | 9.6752630615  |
| NM_012470 | TNP03 | 3227 | 3278 | 5.86790813189 |
| NM_012470 | TNP03 | 1624 | 1705 | 6.86790790352 |
| NM_012470 | TNP03 | 938  | 1078 | 8.6752630615  |
| NM_012470 | TNP03 | 108  | 224  | 6.86790813944 |
| NM_012470 | TNP03 | 1709 | 1784 | 6.86790813944 |
| NM_012470 | TNP03 | 1876 | 1946 | 7.45287063994 |
| NM_012470 | TNP03 | 1108 | 1286 | 9.03783314088 |
| NM_012473 | TXN2  | 593  | 653  | 4.302767104   |
| NM_012473 | TXN2  | 190  | 310  | 5.38690631338 |
| NM_012473 | TXN2  | 1248 | 1299 | 4.302767104   |
| NM_012473 | TXN2  | 530  | 583  | 6.38690631316 |
| NM_012473 | TXN2  | 881  | 986  | 5.38690631338 |
| NM_012473 | TXN2  | 745  | 799  | 4.38690631316 |
| NM_012475 | USP21 | 648  | 728  | 7.78480510809 |

|              |                |      |      |               |
|--------------|----------------|------|------|---------------|
| NM_012474    | UCK2           | 883  | 955  | 7.94707706603 |
| NM_012474    | UCK2           | 4506 | 4546 | 6.72451089437 |
| NM_012474    | UCK2           | 2615 | 2660 | 6.13954839365 |
| NM_012474    | UCK2           | 1435 | 1511 | 7.46165023886 |
| NM_012474    | UCK2           | 1000 | 1069 | 5.13972213642 |
| NM_012474    | UCK2           | 3314 | 3364 | 5.1357045438  |
| NM_012474    | UCK2           | 4769 | 4827 | 6.13972213642 |
| NM_012474    | UCK2           | 2055 | 2130 | 6.72451089437 |
| NM_012474    | UCK2           | 1855 | 1918 | 5.1357045438  |
| NM_012474    | UCK2           | 4294 | 4346 | 7.13971541292 |
| NM_012474    | UCK2           | 3563 | 3631 | 6.1357045438  |
| NM_012474    | UCK2           | 720  | 752  | 5.1357045438  |
| NM_012474    | UCK2           | 3892 | 3953 | 5.13972190805 |
| NM_012474    | UCK2           | 755  | 860  | 7.72468464469 |
| NM_012474    | UCK2           | 425  | 540  | 6.72468464469 |
| NM_012474    | UCK2           | 562  | 714  | 8.13972214397 |
| NM_012474    | UCK2           | 1952 | 2047 | 6.1357045438  |
| NM_012474    | UCK2           | 1174 | 1357 | 8.30964714541 |
| NM_012477    | WBP1           | 326  | 397  | 8.51267027129 |
| NM_006207    | PDGFRL         | 1526 | 1631 | 9.43151900634 |
| NM_006207    | PDGFRL         | 1472 | 1517 | 7.42750140617 |
| NM_006207    | PDGFRL         | 1386 | 1460 | 8.42750140617 |
| NM_001001701 | C4orf3         | 600  | 665  | 3.18795226332 |
| NM_001001701 | C4orf3         | 231  | 296  | 1.18794553227 |
| NM_001001701 | C4orf3         | 687  | 763  | 2.77291476383 |
| NM_001001701 | C4orf3         | 2094 | 2186 | 1.18795226333 |
| NM_001001701 | C4orf3         | 392  | 596  | 5.43587977677 |
| NM_207121    | FAM110A        | 1357 | 1451 | 9.08603076942 |
| NM_182565    | FAM100B        | 893  | 946  | 8.09459929911 |
| NM_182565    | FAM100B        | 790  | 841  | 7.01063384004 |
| NM_182565    | FAM100B        | 1079 | 1130 | 7.0947730492  |
| NM_182565    | FAM100B        | 984  | 1014 | 7.09459929911 |
| NM_015104    | ATG2A          | 592  | 648  | 9.64447499193 |
| NM_015104    | ATG2A          | 1262 | 1289 | 8.97538001287 |
| NM_015104    | ATG2A          | 1423 | 1495 | 9.64448172297 |
| NM_015104    | ATG2A          | 3019 | 3101 | 7.97538001287 |
| NM_015104    | ATG2A          | 665  | 732  | 7.97538001287 |
| NM_015104    | ATG2A          | 2464 | 2548 | 8.05951921471 |
| NM_015104    | ATG2A          | 1816 | 1882 | 8.05934547194 |
| NM_015104    | ATG2A          | 3612 | 3709 | 8.05951922226 |
| NM_018310    | BRF2           | 719  | 785  | 7.59130304283 |
| NM_018310    | BRF2           | 961  | 1024 | 7.59130304283 |
| NM_015541    | LRIG1          | 1950 | 1997 | 6.91852341144 |
| NM_015541    | LRIG1          | 246  | 304  | 8.50750327642 |
| NM_001199058 | C15orf38-AP3S2 | 1064 | 1099 | 7.86836427985 |
| NM_001199058 | C15orf38-AP3S2 | 1144 | 1218 | 7.95250348923 |
| NM_001199058 | C15orf38-AP3S2 | 923  | 1040 | 8.53746575404 |
| NM_001195250 | APTX           | 643  | 738  | 7.09705702874 |
| NM_001195250 | APTX           | 762  | 868  | 7.5962337374  |
| NM_001195250 | APTX           | 155  | 201  | 5.51209452802 |

|              |          |      |      |               |               |
|--------------|----------|------|------|---------------|---------------|
| NM_001195250 | APTX     | 1068 | 1174 | 5.59623372985 |               |
| NM_001195250 | APTX     | 528  | 587  | 6.59221613723 |               |
| NM_001199056 | C16orf5  | 1774 | 1830 | 10.1192659649 |               |
| NM_001199056 | C16orf5  | 455  | 520  | 11.3416583938 |               |
| NM_001199056 | C16orf5  | 716  | 774  | 10.1192659725 |               |
| NM_001199056 | C16orf5  | 596  | 662  | 9.45016426239 |               |
| NM_001199056 | C16orf5  | 1622 | 1771 | 10.1192659725 |               |
| NM_000421    | KRT10    | 1953 | 1995 | 10.2291613707 |               |
| NM_000421    | KRT10    | 1999 | 2062 | 11.2331789709 |               |
| NM_000421    | KRT10    | 1732 | 1852 | 12.040533893  |               |
| NM_006819    | STIP1    | 1181 | 1254 | 4.18718069399 |               |
| NM_006819    | STIP1    | 253  | 396  | 6.64661231285 |               |
| NM_006819    | STIP1    | 1874 | 1971 | 5.5091087891  |               |
| NM_006819    | STIP1    | 1092 | 1181 | 5.18718069422 |               |
| NM_006819    | STIP1    | 1375 | 1436 | 5.18718069422 |               |
| NM_006819    | STIP1    | 1045 | 1083 | 4.77213646388 |               |
| NM_006819    | STIP1    | 1439 | 1543 | 5.99453561627 |               |
| NM_006819    | STIP1    | 1977 | 2087 | 5.99453561627 |               |
| NM_006819    | STIP1    | 1663 | 1780 | 6.35710569566 |               |
| NM_006819    | STIP1    | 1547 | 1644 | 4.77214319494 |               |
| NM_006819    | STIP1    | 1288 | 1374 | 4.18718068667 |               |
| NM_006819    | STIP1    | 803  | 1042 | 5.5091087891  |               |
| NM_006819    | STIP1    | 480  | 697  | 6.99453561627 |               |
| NM_015878    | AZIN1    | 828  | 888  | 5.12254076115 |               |
| NM_015878    | AZIN1    | 1237 | 1306 | 6.71152086205 |               |
| NM_015878    | AZIN1    | 2996 | 3055 | 5.70750326188 |               |
| NM_015878    | AZIN1    | 691  | 811  | 7.12655836133 |               |
| NM_015878    | AZIN1    | 77   | 115  | 6.12254076115 |               |
| NM_015878    | AZIN1    | 151  | 193  | 5.04241915194 |               |
| NM_015878    | AZIN1    | 592  | 636  | 6.12655163027 |               |
| NM_015878    | AZIN1    | 1106 | 1159 | 4.04241915194 |               |
| NM_015878    | AZIN1    | 2332 | 2392 | 5.70750326188 |               |
| NM_015878    | AZIN1    | 1380 | 1486 | 6.71152086205 |               |
| NM_015878    | AZIN1    | 1491 | 1579 | 6.44848645621 |               |
| NM_015878    | AZIN1    | 1806 | 1885 | 5.12655163027 |               |
| NM_015878    | AZIN1    | 332  | 480  | 6.12655836133 |               |
| NM_015878    | AZIN1    | 936  | 1058 | 6.71152086205 |               |
| NM_000356    | TCOF1    | 4715 | 4801 | 6.04808604344 |               |
| NM_000354    | SERPINA7 |      | 308  | 347           | 3.6943297507  |
| NM_000354    | SERPINA7 |      | 372  | 412           | 5.69817360055 |
| NM_000354    | SERPINA7 |      | 1154 | 1196          | 3.69834061982 |
| NM_000354    | SERPINA7 |      | 182  | 224           | 4.69834735087 |
| NM_000354    | SERPINA7 |      | 44   | 87            | 5.28330984404 |
| NM_000354    | SERPINA7 |      | 1392 | 1478          | 3.69834734332 |
| NM_000354    | SERPINA7 |      | 786  | 852           | 5.28313610128 |
| NM_000354    | SERPINA7 |      | 457  | 589           | 6.69834735087 |
| NM_000354    | SERPINA7 |      | 1038 | 1153          | 6.02027544576 |
| NM_000429    | MAT1A    | 1270 | 1319 | 6.30807506762 |               |
| NM_000429    | MAT1A    | 1502 | 1553 | 5.22394258929 |               |
| NM_000428    | LTBP2    | 5431 | 5475 | 12.9314716577 |               |

|           |       |      |      |               |
|-----------|-------|------|------|---------------|
| NM_000428 | LTBP2 | 1056 | 1106 | 11.3426653072 |
| NM_000428 | LTBP2 | 7135 | 7193 | 12.3466829073 |
| NM_000428 | LTBP2 | 3390 | 3449 | 13.9316454081 |
| NM_000428 | LTBP2 | 3468 | 3544 | 11.3426653072 |
| NM_000428 | LTBP2 | 5119 | 5174 | 11.3466761763 |
| NM_000428 | LTBP2 | 3110 | 3152 | 12.3426653072 |
| NM_000428 | LTBP2 | 1267 | 1339 | 12.3466826714 |
| NM_000428 | LTBP2 | 2352 | 2407 | 11.346509157  |
| NM_000428 | LTBP2 | 1616 | 1713 | 12.9276278079 |
| NM_000428 | LTBP2 | 5984 | 6048 | 12.3426653072 |
| NM_000428 | LTBP2 | 3259 | 3306 | 11.3466826714 |
| NM_000428 | LTBP2 | 3710 | 3784 | 11.3426653072 |
| NM_000428 | LTBP2 | 6677 | 6711 | 12.262543698  |
| NM_000428 | LTBP2 | 2220 | 2316 | 11.3466829073 |
| NM_000428 | LTBP2 | 6283 | 6361 | 12.9316454078 |
| NM_000428 | LTBP2 | 3044 | 3095 | 12.346509157  |
| NM_000428 | LTBP2 | 4267 | 4308 | 11.3466826714 |
| NM_000428 | LTBP2 | 3977 | 4055 | 11.346509157  |
| NM_000428 | LTBP2 | 4452 | 4504 | 11.346509157  |
| NM_000428 | LTBP2 | 4084 | 4233 | 13.9316454081 |
| NM_000428 | LTBP2 | 5650 | 5784 | 14.1540378294 |
| NM_000428 | LTBP2 | 2045 | 2155 | 12.9316454078 |
| NM_000428 | LTBP2 | 4347 | 4435 | 13.3466829073 |
| NM_000428 | LTBP2 | 5221 | 5303 | 11.3466828998 |
| NM_000428 | LTBP2 | 4733 | 4838 | 12.3466829073 |
| NM_000428 | LTBP2 | 3597 | 3679 | 11.3466829073 |
| NM_000428 | LTBP2 | 2919 | 3010 | 12.3466829073 |
| NM_000428 | LTBP2 | 4971 | 5044 | 11.3426653072 |
| NM_006810 | PDIA5 | 1740 | 1823 | 4.78219483709 |
| NM_006810 | PDIA5 | 425  | 545  | 6.58954975937 |
| NM_006810 | PDIA5 | 378  | 423  | 5.36313973786 |
| NM_006810 | PDIA5 | 823  | 934  | 6.78219483732 |
| NM_006810 | PDIA5 | 1149 | 1195 | 3.77817723714 |
| NM_006810 | PDIA5 | 1434 | 1535 | 6.78219483732 |
| NM_006810 | PDIA5 | 971  | 1099 | 6.78219483732 |
| NM_006810 | PDIA5 | 547  | 680  | 6.1041229322  |
| NM_006810 | PDIA5 | 201  | 339  | 6.1041229322  |
| NM_000358 | TGFBI | 2334 | 2378 | 4.78892387926 |
| NM_000358 | TGFBI | 464  | 560  | 6.16743550251 |
| NM_000358 | TGFBI | 103  | 235  | 6.16743550251 |
| NM_000358 | TGFBI | 850  | 998  | 6.63692078581 |
| NM_000358 | TGFBI | 1970 | 2329 | 7.89326053907 |
| NM_000358 | TGFBI | 2386 | 2791 | 7.78892387926 |
| NM_000358 | TGFBI | 998  | 1220 | 6.92642740301 |
| NM_000358 | TGFBI | 618  | 835  | 7.3249767795  |
| NM_000358 | TGFBI | 267  | 462  | 6.63692078581 |
| NM_000358 | TGFBI | 1238 | 1960 | 8.89326053907 |
| NM_006816 | LMAN2 | 1566 | 1609 | 5.06860018671 |
| NM_006816 | LMAN2 | 1192 | 1302 | 4.65356268744 |
| NM_006816 | LMAN2 | 1340 | 1412 | 5.3905282816  |



|              |          |      |      |                   |
|--------------|----------|------|------|-------------------|
| NM_006816    | LMAN2    | 1639 | 1759 | 6.06860018672     |
| NM_006816    | LMAN2    | 1075 | 1171 | 5.06860018672     |
| NM_006816    | LMAN2    | 216  | 287  | 4.65356267989     |
| NM_006816    | LMAN2    | 324  | 1058 | 9.09096799975     |
| NM_001161619 | DUS3L    | 488  | 597  | 7.31595127255     |
| NM_006814    | PSMF1    | 930  | 1014 | 3.9478911373      |
| NM_006814    | PSMF1    | 28   | 91   | 5.94789113708     |
| NM_006814    | PSMF1    | 309  | 416  | 6.53285363802     |
| NM_006814    | PSMF1    | 1151 | 1221 | 3.94387353712     |
| NM_006814    | PSMF1    | 1415 | 1490 | 5.5326798877      |
| NM_006814    | PSMF1    | 746  | 871  | 6.26981923218     |
| NM_006814    | PSMF1    | 427  | 614  | 6.9478911373      |
| NM_006815    | TMED2    | 1503 | 1561 | 3.13340302715     |
| NM_006815    | TMED2    | 1053 | 1116 | 3.81147493227     |
| NM_006815    | TMED2    | 1138 | 1352 | 5.33503688832     |
| NM_006815    | TMED2    | 1646 | 1879 | 5.71836552787     |
| NM_006815    | TMED2    | 609  | 858  | 5.66945592739     |
| NM_006815    | TMED2    | 1933 | 2040 | 4.13340302715     |
| NM_006815    | TMED2    | 1433 | 1497 | 1.81147492472     |
| NM_006815    | TMED2    | 74   | 605  | 6.05940244571     |
| NM_003334    | UBA1     | 792  | 848  | 8.42071437008     |
| NM_003334    | UBA1     | 451  | 564  | 8.22806929214     |
| NM_003334    | UBA1     | 575  | 712  | 8.88014598872     |
| NM_003334    | UBA1     | 1480 | 1525 | 7.00165927063     |
| NM_003334    | UBA1     | 3375 | 3437 | 7.42071437008     |
| NM_003334    | UBA1     | 1544 | 1634 | 7.00567687058     |
| NM_003334    | UBA1     | 3312 | 3373 | 7.0056768708      |
| NM_003334    | UBA1     | 232  | 281  | 6.42071436986     |
| NM_003334    | UBA1     | 2916 | 2969 | 7.42071437008     |
| NM_003334    | UBA1     | 2067 | 2198 | 7.42071437008     |
| NM_003334    | UBA1     | 30   | 77   | 5.42054061976     |
| NM_003334    | UBA1     | 1896 | 2031 | 7.42071437008     |
| NM_003334    | UBA1     | 3182 | 3308 | 8.22806929214     |
| NM_003334    | UBA1     | 1636 | 1862 | 9.12115408822     |
| NM_003334    | UBA1     | 1269 | 1413 | 9.0056768708      |
| NM_003334    | UBA1     | 3494 | 3591 | 7.0056768708      |
| NM_003334    | UBA1     | 911  | 1091 | 8.42071437008     |
| NM_003334    | UBA1     | 1118 | 1251 | 8.42071437008     |
| NM_003334    | UBA1     | 2969 | 3170 | 9.22806929214     |
| NM_003334    | UBA1     | 282  | 447  | 8.42071437008     |
| NM_003334    | UBA1     | 2312 | 2883 | 10.8130317929     |
| NM_006215    | SERPINA4 |      | 237  | 307 5.94209157013 |
| NM_006215    | SERPINA4 |      | 621  | 727 6.52705430677 |
| NM_182905    | WASH1    | 880  | 941  | 5.02515647758     |
| NM_182905    | WASH1    | 136  | 195  | 6.02498272726     |
| NM_182905    | WASH1    | 797  | 863  | 5.0211388774      |
| NM_182905    | WASH1    | 944  | 991  | 6.02498272726     |
| NM_182905    | WASH1    | 1553 | 1683 | 7.02515647758     |
| NM_182905    | WASH1    | 1494 | 1550 | 6.02515647758     |
| NM_182905    | WASH1    | 1352 | 1442 | 6.02515647758     |

|           |         |      |      |               |
|-----------|---------|------|------|---------------|
| NM_182905 | WASH1   | 1449 | 1482 | 5.0211388774  |
| NM_182905 | WASH1   | 552  | 738  | 6.02515647758 |
| NM_153638 | PANK2   | 1216 | 1289 | 6.39581288474 |
| NM_153638 | PANK2   | 1649 | 1710 | 5.0738780588  |
| NM_153638 | PANK2   | 1786 | 1833 | 4.07388455393 |
| NM_153638 | PANK2   | 2015 | 2088 | 5.65884729057 |
| NM_153638 | PANK2   | 625  | 731  | 6.07388478985 |
| NM_153638 | PANK2   | 1294 | 1337 | 5.65867354025 |
| NM_153638 | PANK2   | 779  | 838  | 5.07388478985 |
| NM_153638 | PANK2   | 989  | 1188 | 6.88123971191 |
| NM_145312 | ZNF485  | 1866 | 1909 | 11.5979096546 |
| NM_006744 | RBP4    | 43   | 921  | 6.53739364459 |
| NM_006745 | MSM01   | 1762 | 1820 | 6.76465926442 |
| NM_006745 | MSM01   | 1273 | 1313 | 7.26548255576 |
| NM_006745 | MSM01   | 78   | 291  | 10.67154986   |
| NM_006745 | MSM01   | 291  | 361  | 9.08658735931 |
| NM_006745 | MSM01   | 1829 | 1885 | 6.76465926442 |
| NM_006745 | MSM01   | 1437 | 1525 | 7.34962176514 |
| NM_006745 | MSM01   | 424  | 644  | 10.8939422814 |
| NM_006745 | MSM01   | 1902 | 1982 | 7.34962176513 |
| NM_006745 | MSM01   | 646  | 1175 | 11.8731837212 |
| NM_006745 | MSM01   | 2041 | 2153 | 9.08658735931 |
| NM_003999 | OSMR    | 1942 | 1993 | 7.79304634335 |
| NM_003999 | OSMR    | 2785 | 2835 | 6.20406624268 |
| NM_003999 | OSMR    | 2574 | 2655 | 8.79304634357 |
| NM_003999 | OSMR    | 1093 | 1202 | 8.79304634357 |
| NM_003999 | OSMR    | 1544 | 1611 | 7.79304634357 |
| NM_003999 | OSMR    | 969  | 1001 | 7.79304610765 |
| NM_003999 | OSMR    | 2054 | 2136 | 8.79304634357 |
| NM_003999 | OSMR    | 373  | 427  | 7.20791009253 |
| NM_003999 | OSMR    | 814  | 872  | 7.79304634357 |
| NM_003999 | OSMR    | 2477 | 2520 | 6.2080838353  |
| NM_003999 | OSMR    | 3578 | 3622 | 7.7890287434  |
| NM_003999 | OSMR    | 2338 | 2422 | 7.79304634357 |
| NM_003999 | OSMR    | 2701 | 2732 | 7.12394463347 |
| NM_003999 | OSMR    | 2938 | 3021 | 7.79304633602 |
| NM_003999 | OSMR    | 434  | 578  | 9.66751546149 |
| NM_003999 | OSMR    | 1443 | 1529 | 8.20808384285 |
| NM_003999 | OSMR    | 2145 | 2331 | 9.20808384285 |
| NM_003999 | OSMR    | 1226 | 1338 | 6.20808384285 |
| NM_003999 | OSMR    | 685  | 812  | 8.20808384285 |
| NM_003999 | OSMR    | 1694 | 1869 | 9.53001193774 |
| NM_006749 | SLC20A2 | 857  | 928  | 8.96967798737 |
| NM_006749 | SLC20A2 | 2247 | 2301 | 7.96967775145 |
| NM_006749 | SLC20A2 | 1866 | 1906 | 6.88553877799 |
| NM_006749 | SLC20A2 | 508  | 603  | 10.1396029888 |
| NM_006749 | SLC20A2 | 2923 | 2962 | 8.47050127871 |
| NM_006749 | SLC20A2 | 2640 | 2679 | 8.55463375704 |
| NM_006749 | SLC20A2 | 745  | 797  | 8.55464048809 |
| NM_006749 | SLC20A2 | 701  | 744  | 9.29160584634 |

|              |         |      |      |               |
|--------------|---------|------|------|---------------|
| NM_006749    | SLC20A2 | 1307 | 1388 | 9.96967798737 |
| NM_006749    | SLC20A2 | 992  | 1192 | 11.0571408286 |
| NM_006749    | SLC20A2 | 409  | 505  | 8.55464048809 |
| NM_006749    | SLC20A2 | 2696 | 2821 | 8.96967798737 |
| NM_006749    | SLC20A2 | 2168 | 2233 | 8.55446673777 |
| NM_006749    | SLC20A2 | 2467 | 2594 | 9.96967798737 |
| NM_001172687 | GGA1    | 477  | 517  | 6.82276533812 |
| NM_001172687 | GGA1    | 2786 | 2862 | 7.82276557404 |
| NM_001172687 | GGA1    | 1440 | 1502 | 5.82275884298 |
| NM_001172687 | GGA1    | 3062 | 3154 | 5.82275884298 |
| NM_001172687 | GGA1    | 1175 | 1247 | 5.73862636465 |
| NM_001172687 | GGA1    | 2040 | 2078 | 5.82276533812 |
| NM_001172687 | GGA1    | 2493 | 2587 | 6.82276556649 |
| NM_001172687 | GGA1    | 718  | 795  | 5.82276557403 |
| NM_006219    | PIK3CB  | 602  | 672  | 7.07577463647 |
| NM_006219    | PIK3CB  | 3377 | 3451 | 6.49482300487 |
| NM_006219    | PIK3CB  | 1674 | 1750 | 5.49081213575 |
| NM_006219    | PIK3CB  | 2472 | 2524 | 6.49482300487 |
| NM_153634    | CPNE8   | 2696 | 2744 | 10.0194586344 |
| NM_153634    | CPNE8   | 2606 | 2652 | 11.0192916152 |
| NM_153634    | CPNE8   | 2250 | 2299 | 10.0154477653 |
| NM_153634    | CPNE8   | 1029 | 1085 | 10.0192916152 |
| NM_153634    | CPNE8   | 300  | 365  | 11.0154477653 |
| NM_153634    | CPNE8   | 1481 | 1569 | 12.0194586344 |
| NM_020131    | UBQLN4  | 2884 | 2989 | 8.18141965582 |
| NM_020131    | UBQLN4  | 516  | 568  | 6.51231794572 |
| NM_020131    | UBQLN4  | 614  | 679  | 8.91838525    |
| NM_020131    | UBQLN4  | 3239 | 3289 | 7.59645714756 |
| NM_020131    | UBQLN4  | 930  | 1026 | 8.18141965583 |
| NM_020131    | UBQLN4  | 2991 | 3062 | 6.59645715511 |
| NM_020131    | UBQLN4  | 2139 | 2188 | 7.59243955493 |
| NM_020131    | UBQLN4  | 2334 | 2413 | 8.5964571551  |
| NM_020131    | UBQLN4  | 1786 | 1936 | 10.2968968732 |
| NM_020131    | UBQLN4  | 733  | 859  | 7.59645715511 |
| NM_020131    | UBQLN4  | 1940 | 2058 | 8.91838525    |
| NM_020131    | UBQLN4  | 2615 | 2689 | 7.59243955493 |
| NM_020131    | UBQLN4  | 1172 | 1308 | 9.18141965583 |
| NM_020131    | UBQLN4  | 149  | 268  | 8.59645715511 |
| NM_004521    | KIF5B   | 3878 | 3932 | 1.94109244853 |
| NM_004521    | KIF5B   | 3625 | 3721 | 4.75246497076 |
| NM_004521    | KIF5B   | 638  | 750  | 4.75246497076 |
| NM_004521    | KIF5B   | 4168 | 4224 | 3.53007254942 |
| NM_004521    | KIF5B   | 4828 | 4887 | 3.53007254941 |
| NM_004521    | KIF5B   | 1509 | 1623 | 3.5300725492  |
| NM_004521    | KIF5B   | 1156 | 1217 | 1.94511004869 |
| NM_004521    | KIF5B   | 1298 | 1386 | 1.94511004869 |
| NM_004521    | KIF5B   | 2533 | 2594 | 1.94493629838 |
| NM_004521    | KIF5B   | 5467 | 5546 | 2.9451100487  |
| NM_004521    | KIF5B   | 873  | 917  | 3.53006581837 |
| NM_004521    | KIF5B   | 4332 | 4381 | 3.53007254941 |

|           |       |      |      |               |
|-----------|-------|------|------|---------------|
| NM_004521 | KIF5B | 5546 | 5622 | 4.26703814359 |
| NM_004521 | KIF5B | 5141 | 5179 | 2.86097083932 |
| NM_004521 | KIF5B | 517  | 609  | 2.94510331765 |
| NM_004521 | KIF5B | 1996 | 2081 | 1.94510331765 |
| NM_004521 | KIF5B | 3480 | 3603 | 3.53007254942 |
| NM_004521 | KIF5B | 5244 | 5339 | 3.53007254942 |
| NM_004521 | KIF5B | 2999 | 3093 | 3.53007254942 |
| NM_004521 | KIF5B | 2393 | 2480 | 1.94511004869 |
| NM_004521 | KIF5B | 1770 | 1916 | 4.26703814358 |
| NM_004521 | KIF5B | 3941 | 4035 | 1.94511004115 |
| NM_004521 | KIF5B | 2088 | 2218 | 3.53007254942 |
| NM_004521 | KIF5B | 3176 | 3319 | 3.9451100487  |
| NM_004521 | KIF5B | 5646 | 5766 | 2.9451100487  |
| NM_004523 | KIF11 | 1017 | 1076 | 6.94296645794 |
| NM_004523 | KIF11 | 2168 | 2264 | 7.52792919458 |
| NM_004523 | KIF11 | 4941 | 5005 | 4.9429599628  |
| NM_004523 | KIF11 | 1626 | 1673 | 5.94296645794 |
| NM_004523 | KIF11 | 961  | 1003 | 4.94296645794 |
| NM_004523 | KIF11 | 1081 | 1120 | 4.85882748447 |
| NM_004523 | KIF11 | 423  | 493  | 5.94279294354 |
| NM_004523 | KIF11 | 1180 | 1254 | 4.94279294354 |
| NM_004523 | KIF11 | 4591 | 4651 | 5.93894909368 |
| NM_004523 | KIF11 | 2385 | 2519 | 7.26489478875 |
| NM_004523 | KIF11 | 3204 | 3284 | 4.93894909368 |
| NM_004523 | KIF11 | 2005 | 2116 | 5.94296668631 |
| NM_004523 | KIF11 | 1278 | 1362 | 6.52792919457 |
| NM_004523 | KIF11 | 2572 | 2744 | 8.26489478875 |
| NM_004523 | KIF11 | 2988 | 3189 | 7.94296669386 |
| NM_004523 | KIF11 | 4688 | 4776 | 6.94296669386 |
| NM_004524 | LLGL2 | 1123 | 1185 | 6.64863611472 |
| NM_004524 | LLGL2 | 3164 | 3205 | 5.64461875046 |
| NM_004524 | LLGL2 | 3355 | 3399 | 5.56449714125 |
| NM_004524 | LLGL2 | 1900 | 1970 | 5.64862961958 |
| NM_004524 | LLGL2 | 456  | 499  | 5.56449714125 |
| NM_004524 | LLGL2 | 1288 | 1334 | 7.22958125118 |
| NM_004524 | LLGL2 | 633  | 692  | 5.64863634309 |
| NM_004524 | LLGL2 | 2375 | 2446 | 5.64846260032 |
| NM_004524 | LLGL2 | 2502 | 2570 | 6.56449714125 |
| NM_004524 | LLGL2 | 2244 | 2367 | 6.64863635064 |
| NM_004524 | LLGL2 | 3031 | 3097 | 6.64863635041 |
| NM_004524 | LLGL2 | 786  | 874  | 6.64862961958 |
| NM_004526 | MCM2  | 1074 | 1135 | 7.92937830561 |
| NM_004526 | MCM2  | 2797 | 2837 | 6.84523909623 |
| NM_004526 | MCM2  | 2085 | 2142 | 6.92937830561 |
| NM_004526 | MCM2  | 137  | 245  | 5.34441580489 |
| NM_004526 | MCM2  | 1812 | 1929 | 8.51434080633 |
| NM_004526 | MCM2  | 2003 | 2068 | 7.92937830561 |
| NM_004526 | MCM2  | 59   | 116  | 6.92937830561 |
| NM_004526 | MCM2  | 1929 | 1982 | 5.34441580467 |
| NM_004526 | MCM2  | 1136 | 1250 | 6.34441580489 |

|              |            |      |      |                   |
|--------------|------------|------|------|-------------------|
| NM_004526    | MCM2       | 518  | 556  | 5.34441579734     |
| NM_004526    | MCM2       | 2315 | 2432 | 7.92937830561     |
| NM_004526    | MCM2       | 2649 | 2797 | 9.04485552303     |
| NM_004526    | MCM2       | 3356 | 3469 | 8.51434080633     |
| NM_004526    | MCM2       | 319  | 434  | 7.92937830561     |
| NM_004526    | MCM2       | 763  | 923  | 7.66634389978     |
| NM_004526    | MCM2       | 2438 | 2536 | 7.34441580489     |
| NM_004526    | MCM2       | 3025 | 3139 | 8.34441580489     |
| NM_004526    | MCM2       | 3230 | 3295 | 5.34424205457     |
| NM_004526    | MCM2       | 2845 | 3004 | 8.92937830561     |
| NM_004526    | MCM2       | 572  | 763  | 7.66634389978     |
| NM_004526    | MCM2       | 1274 | 1631 | 9.59234331833     |
| NM_032890    | DISP1      | 1303 | 1365 | 10.2596690283     |
| NM_032890    | DISP1      | 3452 | 3526 | 10.1757035693     |
| NM_020139    | BDH2       | 487  | 582  | 7.21108520212     |
| NM_020139    | BDH2       | 350  | 423  | 7.21108520212     |
| NM_020686    | ABAT       | 217  | 344  | 8.00941503596     |
| NM_020686    | ABAT       | 1231 | 1262 | 6.00539743579     |
| NM_020686    | ABAT       | 841  | 937  | 7.59437753668     |
| NM_020686    | ABAT       | 1174 | 1229 | 7.00539743579     |
| NM_014892    | SCAF8      | 2912 | 3008 | 5.77890071357     |
| NM_014892    | SCAF8      | 1027 | 1061 | 5.77889421843     |
| NM_014892    | SCAF8      | 536  | 582  | 4.6947617401      |
| NM_014892    | SCAF8      | 3908 | 3966 | 6.36386344266     |
| NM_014892    | SCAF8      | 2041 | 2068 | 5.6947617401      |
| NM_014892    | SCAF8      | 1942 | 2007 | 4.77889421843     |
| NM_014892    | SCAF8      | 4427 | 4493 | 5.6947617401      |
| NM_014892    | SCAF8      | 3999 | 4068 | 6.36386344266     |
| NM_014892    | SCAF8      | 3060 | 3133 | 6.3638634502      |
| NM_014892    | SCAF8      | 1410 | 1474 | 5.6947617401      |
| NM_014892    | SCAF8      | 3158 | 3232 | 4.77889421843     |
| NM_014892    | SCAF8      | 2241 | 2382 | 6.36386345021     |
| NM_032907    | UBL7       | 346  | 418  | 6.84855789153     |
| NM_032907    | UBL7       | 262  | 327  | 8.34938141879     |
| NM_032907    | UBL7       | 619  | 694  | 8.429503028       |
| NM_032907    | UBL7       | 422  | 530  | 9.17048622234     |
| NM_032905    | RBM17      | 879  | 921  | 3.86379640909     |
| NM_032905    | RBM17      | 207  | 281  | 6.18974210415     |
| NM_032905    | RBM17      | 407  | 507  | 4.86781400926     |
| NM_032905    | RBM17      | 1615 | 1666 | 5.45277627406     |
| NM_032905    | RBM17      | 1388 | 1506 | 3.86781400926     |
| NM_032905    | RBM17      | 1513 | 1599 | 5.45277650976     |
| NM_032905    | RBM17      | 1136 | 1360 | 6.86781400926     |
| NM_032905    | RBM17      | 2355 | 2402 | 3.78367479987     |
| NM_000504    | F10        | 392  | 476  | 3.35187536805     |
| NM_000504    | F10        | 652  | 714  | 2.7669128671      |
| NM_000504    | F10        | 267  | 352  | 1.76691286732     |
| NM_000504    | F10        | 817  | 905  | 2.76691286732     |
| NM_152735    | ZBTB9      | 2204 | 2280 | 9.76576429509     |
| NM_001199760 | ST20-MTHFS |      | 162  | 216 9.17474358343 |

|           |        |      |      |               |
|-----------|--------|------|------|---------------|
| NM_080598 | DDX39B | 1922 | 1994 | 2.98840788795 |
| NM_080598 | DDX39B | 1669 | 1863 | 6.79576281    |
| NM_080598 | DDX39B | 624  | 753  | 6.57337038867 |
| NM_080598 | DDX39B | 1257 | 1467 | 7.23633540139 |
| NM_080598 | DDX39B | 842  | 1052 | 6.79576281    |
| NM_080598 | DDX39B | 1194 | 1256 | 4.57337038867 |
| NM_080598 | DDX39B | 1519 | 1663 | 6.89529848356 |
| NM_080598 | DDX39B | 474  | 621  | 6.44783950658 |
| NM_080598 | DDX39B | 1096 | 1180 | 5.31033598283 |
| NM_020354 | ENTPD7 | 1813 | 1892 | 9.99482353119 |
| NM_020354 | ENTPD7 | 420  | 458  | 7.99482352364 |
| NM_020354 | ENTPD7 | 1636 | 1731 | 8.99482352364 |
| NM_020354 | ENTPD7 | 2173 | 2223 | 7.99482352364 |
| NM_020354 | ENTPD7 | 2056 | 2138 | 10.5797860319 |
| NM_020354 | ENTPD7 | 905  | 954  | 8.91068432181 |
| NM_020354 | ENTPD7 | 1494 | 1574 | 9.99481680014 |
| NM_020357 | PCNP   | 38   | 110  | 3.9475225623  |
| NM_020357 | PCNP   | 405  | 503  | 3.94752279822 |
| NM_020357 | PCNP   | 1507 | 1561 | 3.94751606717 |
| NM_020357 | PCNP   | 982  | 1034 | 3.94350519805 |
| NM_020357 | PCNP   | 1690 | 1763 | 4.94752279822 |
| NM_020357 | PCNP   | 1264 | 1362 | 4.94752279067 |
| NM_020357 | PCNP   | 294  | 397  | 6.53248529894 |
| NM_020357 | PCNP   | 1581 | 1645 | 4.947522798   |
| NM_020357 | PCNP   | 1092 | 1195 | 4.94752279822 |
| NM_002475 | MYL6B  | 481  | 529  | 3.53485433357 |
| NM_002475 | MYL6B  | 559  | 664  | 6.12383443446 |
| NM_172351 | CD46   | 3126 | 3216 | 5.96421803506 |
| NM_172351 | CD46   | 1998 | 2055 | 5.96421803506 |
| NM_172351 | CD46   | 1085 | 1257 | 9.73680753895 |
| NM_172351 | CD46   | 2456 | 2594 | 8.62718304778 |
| NM_172351 | CD46   | 3230 | 3325 | 5.37925553433 |
| NM_172351 | CD46   | 2669 | 2912 | 9.18661045639 |
| NM_172351 | CD46   | 1325 | 1673 | 10.5290026538 |
| NM_172351 | CD46   | 672  | 1068 | 10.6271830478 |
| NM_172351 | CD46   | 2065 | 2114 | 5.29511632495 |
| NM_172351 | CD46   | 1747 | 1955 | 8.90281749039 |
| NM_172351 | CD46   | 2130 | 2288 | 8.62718304778 |
| NM_172351 | CD46   | 34   | 649  | 11.1071759889 |
| NM_172351 | CD46   | 2319 | 2386 | 4.37523793416 |
| NM_014447 | ARFIP1 | 252  | 302  | 8.51687407158 |
| NM_014447 | ARFIP1 | 780  | 932  | 9.10201032262 |
| NM_001320 | CSNK2B | 614  | 707  | 5.1073071521  |
| NM_001320 | CSNK2B | 797  | 842  | 4.10730714455 |
| NM_001320 | CSNK2B | 844  | 889  | 2.10730042105 |
| NM_001320 | CSNK2B | 328  | 585  | 6.69226965282 |
| NM_001320 | CSNK2B | 905  | 1124 | 4.1073071521  |
| NM_007294 | BRCA1  | 6835 | 6908 | 7.67296908024 |
| NM_007294 | BRCA1  | 5937 | 5995 | 7.67280206097 |
| NM_007293 | C4A    | 1470 | 1558 | 5.08907148802 |

|              |       |      |      |               |
|--------------|-------|------|------|---------------|
| NM_007293    | C4A   | 947  | 982  | 3.0888977377  |
| NM_007293    | C4A   | 1820 | 1893 | 4.00493227863 |
| NM_007293    | C4A   | 1911 | 1982 | 4.67403398852 |
| NM_007293    | C4A   | 36   | 80   | 4.0888977377  |
| NM_007293    | C4A   | 3959 | 4026 | 5.4109995829  |
| NM_007293    | C4A   | 3499 | 3538 | 3.00493227863 |
| NM_007293    | C4A   | 1346 | 1418 | 4.67402725769 |
| NM_007293    | C4A   | 2255 | 2285 | 3.08907148047 |
| NM_007293    | C4A   | 1561 | 1664 | 5.41099958291 |
| NM_007293    | C4A   | 1266 | 1324 | 4.08907148802 |
| NM_007293    | C4A   | 2313 | 2361 | 3.08906475696 |
| NM_007293    | C4A   | 5093 | 5216 | 4.67403398874 |
| NM_007293    | C4A   | 3368 | 3412 | 4.0890712521  |
| NM_007293    | C4A   | 377  | 434  | 3.08505388785 |
| NM_007293    | C4A   | 2381 | 2496 | 5.41099958291 |
| NM_007293    | C4A   | 447  | 612  | 5.08907148802 |
| NM_007293    | C4A   | 4134 | 4271 | 4.08907148802 |
| NM_007293    | C4A   | 4457 | 4495 | 3.08505388785 |
| NM_007293    | C4A   | 4275 | 4375 | 4.08907148802 |
| NM_007293    | C4A   | 2549 | 2686 | 5.89642641008 |
| NM_007293    | C4A   | 4608 | 4753 | 4.08907148802 |
| NM_007293    | C4A   | 97   | 161  | 4.0890714878  |
| NM_007293    | C4A   | 2866 | 3035 | 6.54850310666 |
| NM_007293    | C4A   | 2009 | 2115 | 3.08907148802 |
| NM_007293    | C4A   | 4771 | 4851 | 4.08505388785 |
| NM_007293    | C4A   | 2718 | 2845 | 4.08907148802 |
| NM_007293    | C4A   | 3046 | 3238 | 5.41099958291 |
| NM_007293    | C4A   | 4498 | 4604 | 4.08907148802 |
| NM_007292    | ACOX1 | 2596 | 2646 | 4.1225993068  |
| NM_007292    | ACOX1 | 5583 | 5646 | 4.11858843768 |
| NM_007292    | ACOX1 | 1682 | 1730 | 5.70756180752 |
| NM_007292    | ACOX1 | 3074 | 3133 | 5.12260603784 |
| NM_007292    | ACOX1 | 1589 | 1675 | 6.12260603785 |
| NM_007292    | ACOX1 | 628  | 678  | 6.44051653256 |
| NM_007292    | ACOX1 | 965  | 1045 | 6.12260603785 |
| NM_007292    | ACOX1 | 461  | 528  | 6.12260603785 |
| NM_007292    | ACOX1 | 1047 | 1120 | 6.12260603763 |
| NM_007292    | ACOX1 | 289  | 332  | 4.11858843768 |
| NM_007292    | ACOX1 | 6145 | 6188 | 4.03846682846 |
| NM_007292    | ACOX1 | 336  | 376  | 6.12243228753 |
| NM_007292    | ACOX1 | 7196 | 7259 | 4.03846682846 |
| NM_007292    | ACOX1 | 2710 | 2756 | 4.11858843768 |
| NM_007292    | ACOX1 | 6849 | 6916 | 4.12260603785 |
| NM_007292    | ACOX1 | 3642 | 3681 | 6.44051653256 |
| NM_007292    | ACOX1 | 2122 | 2450 | 8.44453413274 |
| NM_007292    | ACOX1 | 1757 | 1937 | 7.29253103929 |
| NM_007292    | ACOX1 | 2009 | 2079 | 4.12260603785 |
| NM_007292    | ACOX1 | 1136 | 1565 | 8.44453413274 |
| NM_007292    | ACOX1 | 709  | 819  | 6.44453413274 |
| NM_001136472 | LITAF | 990  | 1043 | 6.30819754008 |

|              |         |      |      |               |
|--------------|---------|------|------|---------------|
| NM_001102416 | KNG1    | 1477 | 1540 | 7.41806136551 |
| NM_001102416 | KNG1    | 1657 | 1697 | 6.41404376534 |
| NM_001102416 | KNG1    | 582  | 639  | 8.00302385868 |
| NM_001102416 | KNG1    | 941  | 982  | 7.41806112959 |
| NM_001102416 | KNG1    | 1981 | 2009 | 6.33392215613 |
| NM_001102416 | KNG1    | 468  | 568  | 9.22541628757 |
| NM_001102416 | KNG1    | 651  | 764  | 8.7399894604  |
| NM_001102416 | KNG1    | 779  | 939  | 9.7399894604  |
| NM_001102416 | KNG1    | 2518 | 2576 | 6.41404376534 |
| NM_001102416 | KNG1    | 114  | 210  | 9.22541628757 |
| NM_001102416 | KNG1    | 1182 | 1380 | 10.1185010837 |
| NM_001102416 | KNG1    | 212  | 458  | 10.8103787883 |
| NM_001102416 | KNG1    | 989  | 1043 | 8.41806136551 |
| NM_001193360 | EXD2    | 837  | 899  | 8.69876877162 |
| NM_001193360 | EXD2    | 1826 | 1878 | 7.61463629329 |
| NM_001193360 | EXD2    | 1492 | 1531 | 7.6947579025  |
| NM_001193360 | EXD2    | 1575 | 1640 | 8.69877549512 |
| NM_001193360 | EXD2    | 228  | 295  | 9.28356425307 |
| NM_001193360 | EXD2    | 2875 | 2926 | 7.61463629329 |
| NM_001193360 | EXD2    | 2182 | 2263 | 8.69877549512 |
| NM_001193360 | EXD2    | 113  | 176  | 9.28373127234 |
| NM_001193360 | EXD2    | 991  | 1036 | 7.61463629329 |
| NM_001193360 | EXD2    | 2111 | 2151 | 7.61463629329 |
| NM_001193360 | EXD2    | 531  | 609  | 9.27972040322 |
| NM_001193360 | EXD2    | 1382 | 1470 | 7.6947579025  |
| NM_004136    | IREB2   | 2684 | 2789 | 7.06138399754 |
| NM_004136    | IREB2   | 5134 | 5189 | 6.47240390419 |
| NM_004136    | IREB2   | 288  | 382  | 7.06138400509 |
| NM_004136    | IREB2   | 1969 | 2031 | 7.06138400509 |
| NM_004136    | IREB2   | 2621 | 2668 | 5.47624775405 |
| NM_004136    | IREB2   | 4037 | 4093 | 6.39228229498 |
| NM_004136    | IREB2   | 772  | 850  | 5.47624775405 |
| NM_004136    | IREB2   | 2851 | 2887 | 6.39228229498 |
| NM_004136    | IREB2   | 1822 | 1935 | 7.06137727403 |
| NM_004136    | IREB2   | 671  | 736  | 5.47240390419 |
| NM_004136    | IREB2   | 514  | 584  | 7.06138399754 |
| NM_004135    | IDH3G   | 1230 | 1266 | 6.17693861036 |
| NM_004135    | IDH3G   | 1274 | 1343 | 6.17710562962 |
| NM_001040402 | DCUN1D4 | 2875 | 2961 | 6.18734360289 |
| NM_001040402 | DCUN1D4 | 3992 | 4038 | 5.59853725231 |
| NM_001040402 | DCUN1D4 | 3689 | 3758 | 6.60255485249 |
| NM_001040402 | DCUN1D4 | 801  | 868  | 4.5184156431  |
| NM_001040402 | DCUN1D4 | 968  | 1032 | 4.5184156431  |
| NM_001040402 | DCUN1D4 | 2484 | 2551 | 4.59853725231 |
| NM_001040402 | DCUN1D4 | 1993 | 2054 | 4.59853725231 |
| NM_001040402 | DCUN1D4 | 3148 | 3191 | 5.60238110217 |
| NM_001040402 | DCUN1D4 | 1471 | 1576 | 6.92448294737 |
| NM_001040402 | DCUN1D4 | 1243 | 1407 | 6.18751735321 |
| NM_001040402 | DCUN1D4 | 262  | 347  | 6.18751735321 |
| NM_001040402 | DCUN1D4 | 478  | 608  | 7.18751735321 |



|              |         |      |      |               |
|--------------|---------|------|------|---------------|
| NM_001040402 | DCUN1D4 | 1049 | 1159 | 6.92448294737 |
| NM_001040402 | DCUN1D4 | 2551 | 2699 | 6.92448294737 |
| NM_001040402 | DCUN1D4 | 1792 | 1870 | 5.60254812143 |
| NM_001040402 | DCUN1D4 | 4148 | 4246 | 4.60255485249 |
| NM_001326    | CSTF3   | 348  | 393  | 4.13667140529 |
| NM_001326    | CSTF3   | 2303 | 2346 | 5.13667140529 |
| NM_001326    | CSTF3   | 2059 | 2159 | 4.14068900546 |
| NM_001326    | CSTF3   | 131  | 222  | 4.14068227441 |
| NM_145644    | MRPL35  | 478  | 563  | 7.11570902061 |
| NM_145644    | MRPL35  | 217  | 271  | 6.53057276957 |
| NM_145644    | MRPL35  | 653  | 705  | 6.44660731051 |
| NM_145644    | MRPL35  | 140  | 199  | 7.85267461478 |
| NM_002067    | GNA11   | 2112 | 2140 | 7.37769655066 |
| NM_002067    | GNA11   | 1986 | 2046 | 6.46166200972 |
| NM_002067    | GNA11   | 1793 | 1862 | 7.46183576004 |
| NM_002067    | GNA11   | 1887 | 1927 | 6.45781815987 |
| NM_002067    | GNA11   | 1564 | 1608 | 7.45781815987 |
| NM_002067    | GNA11   | 1147 | 1217 | 6.46183576004 |
| NM_002067    | GNA11   | 239  | 286  | 7.37769655066 |
| NM_002067    | GNA11   | 2701 | 2777 | 8.04679826076 |
| NM_002067    | GNA11   | 2643 | 2696 | 8.04679826076 |
| NM_002067    | GNA11   | 863  | 990  | 7.46183576004 |
| NM_002067    | GNA11   | 995  | 1123 | 9.04679826076 |
| NM_002067    | GNA11   | 662  | 742  | 7.46183576004 |
| NM_001184801 | UBR2    | 721  | 787  | 7.54692999094 |
| NM_002061    | GCLM    | 556  | 653  | 10.1350259588 |
| NM_002061    | GCLM    | 1026 | 1066 | 8.90861593732 |
| NM_002061    | GCLM    | 902  | 967  | 8.91263353749 |
| NM_002061    | GCLM    | 342  | 382  | 8.3236534366  |
| NM_002061    | GCLM    | 776  | 843  | 8.32767103677 |
| NM_002061    | GCLM    | 1244 | 1345 | 9.32767103677 |
| NM_006037    | HDAC4   | 656  | 711  | 9.05033754606 |
| NM_002069    | GNAI1   | 1445 | 1490 | 9.38329505961 |
| NM_002069    | GNAI1   | 1685 | 1809 | 10.9682575606 |
| NM_002069    | GNAI1   | 1239 | 1288 | 8.71419334972 |
| NM_002069    | GNAI1   | 168  | 208  | 7.71419334972 |
| NM_002069    | GNAI1   | 1356 | 1418 | 7.79815880879 |
| NM_002069    | GNAI1   | 2168 | 2251 | 9.38329482391 |
| NM_002069    | GNAI1   | 923  | 1046 | 11.3832950598 |
| NM_002069    | GNAI1   | 763  | 912  | 11.4987722772 |
| NM_002069    | GNAI1   | 1496 | 1559 | 10.1202604181 |
| NM_002069    | GNAI1   | 439  | 494  | 9.38328832878 |
| NM_002069    | GNAI1   | 650  | 762  | 10.120260654  |
| NM_002069    | GNAI1   | 1599 | 1663 | 8.79833255889 |
| NM_012260    | HACL1   | 1190 | 1263 | 7.67232856587 |
| NM_003198    | TCEB3   | 1859 | 1921 | 4.96726476068 |
| NM_003198    | TCEB3   | 1431 | 1483 | 5.96324716052 |
| NM_003198    | TCEB3   | 617  | 670  | 5.88312555131 |
| NM_003198    | TCEB3   | 374  | 421  | 4.96324716052 |
| NM_003198    | TCEB3   | 670  | 754  | 5.96324716052 |

|              |       |      |      |               |
|--------------|-------|------|------|---------------|
| NM_003198    | TCEB3 | 1972 | 2056 | 4.96726475314 |
| NM_003000    | SDHB  | 546  | 595  | 5.46366160178 |
| NM_003000    | SDHB  | 272  | 348  | 4.87869933675 |
| NM_003000    | SDHB  | 625  | 750  | 6.20062743186 |
| NM_003000    | SDHB  | 360  | 508  | 7.57913905512 |
| NM_003000    | SDHB  | 786  | 918  | 5.87869933698 |
| NM_153186    | KANK1 | 5225 | 5314 | 3.49115952245 |
| NM_153186    | KANK1 | 4930 | 4979 | 3.40702031329 |
| NM_153186    | KANK1 | 2259 | 2315 | 4.49115952245 |
| NM_153186    | KANK1 | 1846 | 1903 | 3.49098577236 |
| NM_153186    | KANK1 | 3012 | 3071 | 3.49115951512 |
| NM_153186    | KANK1 | 2567 | 2629 | 2.4871419225  |
| NM_153186    | KANK1 | 4674 | 4766 | 4.49115952245 |
| NM_153186    | KANK1 | 4528 | 4577 | 3.4871419225  |
| NM_153186    | KANK1 | 2648 | 2755 | 3.49115279162 |
| NM_001128176 | THRB  | 654  | 740  | 7.08931129314 |
| NM_001136005 | GART  | 1681 | 1757 | 8.02486244308 |
| NM_001136005 | GART  | 2488 | 2584 | 6.21750752102 |
| NM_001136005 | GART  | 1759 | 1827 | 7.80247002174 |
| NM_001136005 | GART  | 2597 | 2656 | 5.21750752101 |
| NM_001136005 | GART  | 2147 | 2205 | 5.21750751347 |
| NM_001136005 | GART  | 3407 | 3475 | 5.21750078996 |
| NM_001136005 | GART  | 1515 | 1566 | 6.21750752102 |
| NM_001136005 | GART  | 2025 | 2113 | 7.21750752102 |
| NM_001136005 | GART  | 3139 | 3237 | 7.53943537999 |
| NM_001136005 | GART  | 2734 | 2840 | 8.02486244308 |
| NM_001136005 | GART  | 1371 | 1489 | 8.38743252246 |
| NM_001136005 | GART  | 775  | 965  | 8.67693913966 |
| NM_001136005 | GART  | 1237 | 1332 | 8.02486244308 |
| NM_001136005 | GART  | 1844 | 2022 | 8.67693913966 |
| NM_001136005 | GART  | 323  | 413  | 5.21750078996 |
| NM_001136005 | GART  | 2840 | 3020 | 8.02486244308 |
| NM_001136005 | GART  | 2217 | 2406 | 8.53943561591 |
| NM_001136005 | GART  | 465  | 594  | 8.21750752102 |
| NM_005050    | ABCD4 | 731  | 773  | 5.74544278935 |
| NM_005050    | ABCD4 | 1865 | 1907 | 5.74527577008 |
| NM_005050    | ABCD4 | 829  | 896  | 6.66131031102 |
| NM_005050    | ABCD4 | 362  | 455  | 6.74544952018 |
| NM_001029891 | PGAM4 | 467  | 522  | 6.16706903698 |
| NM_001029891 | PGAM4 | 376  | 444  | 5.43010344282 |
| NM_001029891 | PGAM4 | 902  | 998  | 6.65249586415 |
| NM_001029891 | PGAM4 | 1553 | 1602 | 3.84514070618 |
| NM_001029891 | PGAM4 | 522  | 569  | 5.43010344282 |
| NM_001029891 | PGAM4 | 811  | 886  | 7.16706903698 |
| NM_001029891 | PGAM4 | 131  | 164  | 5.84514094209 |
| NM_001029891 | PGAM4 | 1055 | 1087 | 5.84514093455 |
| NM_001029891 | PGAM4 | 1240 | 1307 | 5.8451409421  |
| NM_001029891 | PGAM4 | 189  | 317  | 7.16706903698 |
| NM_001029891 | PGAM4 | 589  | 717  | 7.01506594354 |
| NM_001029896 | WDR45 | 1175 | 1227 | 7.26917871627 |

|              |           |      |      |                    |
|--------------|-----------|------|------|--------------------|
| NM_001029896 | WDR45     | 904  | 987  | 7.85815880961      |
| NM_001029896 | WDR45     | 1103 | 1167 | 8.27319631644      |
| NM_004313    | ARRB2     | 1188 | 1238 | 5.84415389014      |
| NM_004313    | ARRB2     | 431  | 470  | 7.42911639086      |
| NM_004313    | ARRB2     | 979  | 1041 | 7.84817148276      |
| NM_004313    | ARRB2     | 319  | 384  | 7.43313398348      |
| NM_004313    | ARRB2     | 588  | 683  | 7.43313399103      |
| NM_004313    | ARRB2     | 1651 | 1747 | 7.43296024071      |
| NM_004313    | ARRB2     | 1347 | 1468 | 8.1700995852       |
| NM_003009    | SEPW1     | 806  | 848  | 7.27752252222      |
| NM_025243    | SLC19A3   | 1094 | 1150 | 12.2226436441      |
| NM_025243    | SLC19A3   | 1795 | 1842 | 10.6376811434      |
| NM_025243    | SLC19A3   | 1309 | 1397 | 12.9636268385      |
| NM_025243    | SLC19A3   | 854  | 898  | 12.226487494       |
| NM_025243    | SLC19A3   | 1664 | 1746 | 12.2266610084      |
| NM_004317    | ASNA1     | 467  | 692  | 6.36308493969      |
| NM_001017967 | MARVELD3  |      | 1273 | 1333 10.0452868237 |
| NM_001017967 | MARVELD3  |      | 1742 | 1801 8.96132136465 |
| NM_001017967 | MARVELD3  |      | 878  | 936 10.045453843   |
| NM_001017967 | MARVELD3  |      | 571  | 644 10.045460574   |
| NM_004643    | PABPN1    | 1796 | 1839 | 2.85333503825      |
| NM_004643    | PABPN1    | 1391 | 1483 | 1.8533350307       |
| NM_004643    | PABPN1    | 1666 | 1729 | 1.8533283072       |
| NM_004643    | PABPN1    | 1853 | 1925 | 1.85333480233      |
| NM_004643    | PABPN1    | 2684 | 2818 | 5.02326003969      |
| NM_004643    | PABPN1    | 2315 | 2385 | 1.8533350307       |
| NM_005597    | NFIC      | 6532 | 6586 | 7.34181420675      |
| NM_005597    | NFIC      | 3569 | 3653 | 8.34180748325      |
| NM_005597    | NFIC      | 6409 | 6490 | 8.92677671502      |
| NM_005597    | NFIC      | 566  | 616  | 7.25767500492      |
| NM_005597    | NFIC      | 419  | 469  | 8.34180748325      |
| NM_005597    | NFIC      | 3669 | 3723 | 7.34180748325      |
| NM_005597    | NFIC      | 213  | 266  | 7.33779661413      |
| NM_005597    | NFIC      | 1854 | 1914 | 7.33779661413      |
| NM_005597    | NFIC      | 7595 | 7683 | 8.3418142143       |
| NM_005597    | NFIC      | 4555 | 4681 | 9.92677671502      |
| NM_005597    | NFIC      | 7245 | 7359 | 9.66374230919      |
| NM_005597    | NFIC      | 6274 | 6347 | 7.34181420675      |
| NM_005597    | NFIC      | 619  | 708  | 8.92677671502      |
| NM_005597    | NFIC      | 833  | 964  | 7.3418142143       |
| NM_005591    | MRE11A    | 2946 | 2994 | 7.65734146913      |
| NM_080616    | C20orf112 |      | 2347 | 2429 6.92717355177 |
| NM_080616    | C20orf112 |      | 221  | 273 7.34221105105  |
| NM_080616    | C20orf112 |      | 6027 | 6091 5.34221105105 |
| NM_080616    | C20orf112 |      | 4604 | 4651 6.25807184922 |
| NM_080616    | C20orf112 |      | 4890 | 5012 7.66413915349 |
| NM_080616    | C20orf112 |      | 5692 | 5729 6.25807184922 |
| NM_080616    | C20orf112 |      | 5328 | 5385 5.34203730828 |
| NM_080616    | C20orf112 |      | 1834 | 1909 5.3422110586  |
| NM_080616    | C20orf112 |      | 1975 | 2068 6.3422110586  |

|              |             |      |      |               |
|--------------|-------------|------|------|---------------|
| NM_080616    | C20orf112   | 665  | 829  | 7.66413915349 |
| NM_080616    | C20orf112   | 4518 | 4575 | 6.9271733234  |
| NM_005000    | NDUFA5 119  | 191  |      | 6.31659677836 |
| NM_005000    | NDUFA5 324  | 389  |      | 4.73162754659 |
| NM_005000    | NDUFA5 439  | 502  |      | 4.73163427764 |
| NM_001145425 | NR1D2 1181  | 1253 |      | 6.45529152153 |
| NM_001145425 | NR1D2 210   | 277  |      | 6.45529801667 |
| NM_001145425 | NR1D2 1637  | 1674 |      | 7.3711590432  |
| NM_015332    | NUDCD3 1231 | 1294 |      | 6.16727316787 |
| NM_015332    | NUDCD3 2956 | 3034 |      | 6.16727316787 |
| NM_015332    | NUDCD3 2289 | 2322 |      | 5.16726643681 |
| NM_015332    | NUDCD3 379  | 429  |      | 5.16325556769 |
| NM_015332    | NUDCD3 3170 | 3248 |      | 8.16727316787 |
| NM_015332    | NUDCD3 2531 | 2562 |      | 5.08313395848 |
| NM_015332    | NUDCD3 2896 | 2946 |      | 6.16709941755 |
| NM_015332    | NUDCD3 1584 | 1776 |      | 8.86771288601 |
| NM_015332    | NUDCD3 2707 | 2804 |      | 7.75223566859 |
| NM_015332    | NUDCD3 1850 | 1916 |      | 6.16727316787 |
| NM_015331    | NCSTN 2558  | 2633 |      | 7.34663349696 |
| NM_015331    | NCSTN 1026  | 1092 |      | 5.02470540185 |
| NM_015331    | NCSTN 834   | 902  |      | 8.19463040351 |
| NM_015331    | NCSTN 256   | 290  |      | 5.94056619269 |
| NM_015331    | NCSTN 177   | 238  |      | 6.02470539452 |
| NM_015331    | NCSTN 1108  | 1359 |      | 9.83206032413 |
| NM_015331    | NCSTN 1890  | 2196 |      | 9.97890171246 |
| NM_015331    | NCSTN 1745  | 1797 |      | 5.02470516615 |
| NM_015331    | NCSTN 2240  | 2273 |      | 4.94056619269 |
| NM_015331    | NCSTN 2489  | 2555 |      | 6.60966117174 |
| NM_015331    | NCSTN 563   | 683  |      | 8.60966790279 |
| NM_015331    | NCSTN 376   | 502  |      | 6.60966790279 |
| NM_015331    | NCSTN 1370  | 1724 |      | 10.3822574067 |
| NM_015331    | NCSTN 1811  | 1859 |      | 6.60966790257 |
| NM_015331    | NCSTN 2273  | 2452 |      | 8.19463040351 |
| NM_015331    | NCSTN 908   | 1022 |      | 8.02470540207 |
| NM_001145426 | CSDA 1272   | 1326 |      | 3.84840698803 |
| NM_001145426 | CSDA 1341   | 1407 |      | 5.17435268309 |
| NM_001145426 | CSDA 690    | 742  |      | 3.85241785715 |
| NM_001145426 | CSDA 1672   | 1726 |      | 2.85242435228 |
| NM_001145426 | CSDA 748    | 832  |      | 3.85242458819 |
| NM_001145426 | CSDA 528    | 689  |      | 5.8524245882  |
| NM_018257    | PCMTD2 1420 | 1448 |      | 3.17661476075 |
| NM_018257    | PCMTD2 2191 | 2329 |      | 4.26075397013 |
| NM_018256    | WDR12 1297  | 1339 |      | 4.46247796299 |
| NM_018256    | WDR12 1165  | 1214 |      | 5.13157294205 |
| NM_018256    | WDR12 1439  | 1517 |      | 3.54661693646 |
| NM_018256    | WDR12 741   | 860  |      | 4.54661717238 |
| NM_015335    | MED13L 4776 | 4823 |      | 7.75691143043 |
| NM_015335    | MED13L 3560 | 3610 |      | 8.34187393115 |
| NM_015335    | MED13L 1790 | 1854 |      | 8.34187369523 |
| NM_015335    | MED13L 3055 | 3136 |      | 7.75691143042 |

|              |        |      |      |               |
|--------------|--------|------|------|---------------|
| NM_015335    | MED13L | 2032 | 2110 | 8.34187393115 |
| NM_015335    | MED13L | 348  | 388  | 7.75673768011 |
| NM_015335    | MED13L | 7072 | 7135 | 7.75690469937 |
| NM_015335    | MED13L | 6448 | 6538 | 7.75691119451 |
| NM_015335    | MED13L | 6731 | 6778 | 7.67277222104 |
| NM_015335    | MED13L | 38   | 96   | 7.75691143042 |
| NM_015335    | MED13L | 2776 | 2821 | 6.75289383026 |
| NM_015335    | MED13L | 3320 | 3359 | 6.67277222104 |
| NM_015335    | MED13L | 6680 | 6731 | 7.75673768011 |
| NM_015335    | MED13L | 101  | 184  | 8.34170018083 |
| NM_015335    | MED13L | 2476 | 2545 | 6.75691143042 |
| NM_015335    | MED13L | 923  | 970  | 8.33785633098 |
| NM_015335    | MED13L | 4375 | 4482 | 6.75691143043 |
| NM_015335    | MED13L | 252  | 322  | 8.3418739236  |
| NM_015335    | MED13L | 3841 | 4011 | 8.34187393115 |
| NM_015335    | MED13L | 5143 | 5234 | 8.34187393115 |
| NM_015335    | MED13L | 3467 | 3539 | 7.67277222104 |
| NM_015335    | MED13L | 9045 | 9123 | 7.75673768011 |
| NM_018259    | TTC17  | 3758 | 3829 | 5.52168312102 |
| NM_018259    | TTC17  | 3360 | 3402 | 6.10647860248 |
| NM_018259    | TTC17  | 3273 | 3342 | 6.10665235279 |
| NM_018259    | TTC17  | 1917 | 1975 | 4.52168985208 |
| NM_018259    | TTC17  | 334  | 409  | 5.52168985208 |
| NM_018259    | TTC17  | 991  | 1052 | 6.52168985208 |
| NM_018259    | TTC17  | 1702 | 1797 | 6.1066523528  |
| NM_018259    | TTC17  | 2386 | 2424 | 6.10664562175 |
| NM_018259    | TTC17  | 3169 | 3228 | 6.52168984453 |
| NM_018259    | TTC17  | 1241 | 1276 | 6.10665234525 |
| NM_018259    | TTC17  | 3938 | 3993 | 6.52168312102 |
| NM_018259    | TTC17  | 3583 | 3669 | 4.52168985208 |
| NM_018259    | TTC17  | 2213 | 2322 | 8.1066523528  |
| NM_018259    | TTC17  | 619  | 661  | 5.5176722519  |
| NM_018259    | TTC17  | 3019 | 3110 | 6.84361794697 |
| NM_018259    | TTC17  | 2322 | 2367 | 6.10665235258 |
| NM_018259    | TTC17  | 501  | 593  | 6.84361794697 |
| NM_018259    | TTC17  | 1326 | 1467 | 7.98112147072 |
| NM_018259    | TTC17  | 1062 | 1208 | 7.1066523528  |
| NM_018259    | TTC17  | 2730 | 2812 | 4.52168961616 |
| NM_018259    | TTC17  | 2472 | 2613 | 5.52168985208 |
| NM_018259    | TTC17  | 716  | 979  | 8.42858044769 |
| NM_018259    | TTC17  | 2034 | 2179 | 7.84361794697 |
| NM_018259    | TTC17  | 1472 | 1700 | 8.1066523528  |
| NM_001197124 | IRF3   | 1030 | 1063 | 7.30988458604 |
| NM_001197124 | IRF3   | 211  | 272  | 7.39385004511 |
| NM_001197124 | IRF3   | 869  | 974  | 9.39402379542 |
| NM_001197124 | IRF3   | 1079 | 1148 | 7.39401706437 |
| NM_001197124 | IRF3   | 721  | 841  | 9.39402379542 |
| NM_001197124 | IRF3   | 284  | 332  | 7.39000619525 |
| NM_001197124 | IRF3   | 82   | 167  | 7.39402378787 |
| NM_001197124 | IRF3   | 544  | 713  | 10.3940237954 |

|           |       |      |      |               |
|-----------|-------|------|------|---------------|
| NM_012316 | KPNA6 | 2080 | 2152 | 8.31881887359 |
| NM_012316 | KPNA6 | 333  | 430  | 8.31881887358 |
| NM_012316 | KPNA6 | 1355 | 1456 | 8.90378137431 |
| NM_012316 | KPNA6 | 2190 | 2246 | 7.31864512327 |
| NM_012316 | KPNA6 | 1811 | 1893 | 7.89976377414 |
| NM_012316 | KPNA6 | 516  | 581  | 8.64074696848 |
| NM_012316 | KPNA6 | 2889 | 2954 | 6.31881886604 |
| NM_012316 | KPNA6 | 6813 | 6859 | 6.31480127342 |
| NM_012316 | KPNA6 | 3716 | 3764 | 6.31480127342 |
| NM_012316 | KPNA6 | 1586 | 1631 | 6.31864512327 |
| NM_012316 | KPNA6 | 752  | 804  | 8.31881887358 |
| NM_012316 | KPNA6 | 584  | 661  | 8.31881887337 |
| NM_012316 | KPNA6 | 3300 | 3380 | 6.31480127342 |
| NM_012316 | KPNA6 | 675  | 735  | 7.23467966421 |
| NM_012316 | KPNA6 | 3391 | 3466 | 8.90377464326 |
| NM_012316 | KPNA6 | 825  | 912  | 8.64074696848 |
| NM_012316 | KPNA6 | 6124 | 6258 | 6.31881887358 |
| NM_012310 | KIF4A | 838  | 922  | 6.67468217941 |
| NM_012310 | KIF4A | 2986 | 3072 | 5.67450842909 |
| NM_012310 | KIF4A | 3915 | 3971 | 6.67450842909 |
| NM_012310 | KIF4A | 4186 | 4214 | 5.59054297003 |
| NM_012310 | KIF4A | 519  | 570  | 5.67450842909 |
| NM_012310 | KIF4A | 4274 | 4375 | 7.25964468013 |
| NM_012310 | KIF4A | 3596 | 3670 | 7.67066457924 |
| NM_012310 | KIF4A | 631  | 708  | 5.67467544836 |
| NM_012310 | KIF4A | 711  | 781  | 8.25964468013 |
| NM_012310 | KIF4A | 983  | 1042 | 6.67468217919 |
| NM_012310 | KIF4A | 2589 | 2704 | 7.25964468013 |
| NM_012310 | KIF4A | 3392 | 3487 | 6.67468217941 |
| NM_012318 | LETM1 | 804  | 876  | 6.18012246787 |
| NM_012318 | LETM1 | 3876 | 3943 | 7.18012246787 |
| NM_012318 | LETM1 | 1138 | 1184 | 5.18011573681 |
| NM_012318 | LETM1 | 5115 | 5244 | 7.18012246786 |
| NM_012318 | LETM1 | 744  | 791  | 5.18012246765 |
| NM_012318 | LETM1 | 4036 | 4080 | 6.17994871755 |
| NM_012318 | LETM1 | 1334 | 1390 | 5.17994871755 |
| NM_012318 | LETM1 | 3219 | 3303 | 5.18012246765 |
| NM_012318 | LETM1 | 2950 | 3016 | 6.76507823754 |
| NM_012318 | LETM1 | 3641 | 3727 | 5.18012246765 |
| NM_012318 | LETM1 | 3797 | 3868 | 6.18011573681 |
| NM_012318 | LETM1 | 4262 | 4397 | 8.88056218601 |
| NM_012318 | LETM1 | 1212 | 1333 | 7.50205056276 |
| NM_012318 | LETM1 | 407  | 717  | 9.35004746931 |
| NM_012318 | LETM1 | 1986 | 2111 | 6.18012246787 |
| NM_012318 | LETM1 | 1866 | 1928 | 7.18012246787 |
| NM_012318 | LETM1 | 3017 | 3185 | 8.18012246787 |
| NM_012318 | LETM1 | 1551 | 1698 | 6.76508496859 |
| NM_012318 | LETM1 | 2833 | 2900 | 6.18011573681 |
| NM_012318 | LETM1 | 1725 | 1852 | 7.50205056276 |
| NM_012318 | LETM1 | 887  | 1031 | 8.35004746931 |

|           |        |      |      |                |
|-----------|--------|------|------|----------------|
| NM_012318 | LETM1  | 2314 | 2396 | 7.76508496859  |
| NM_012318 | LETM1  | 4951 | 5061 | 6.18012246786  |
| NM_005738 | ARL4A  | 807  | 859  | 6.58873721841  |
| NM_005738 | ARL4A  | 604  | 668  | 6.59258106826  |
| NM_005738 | ARL4A  | 1155 | 1199 | 5.5086156092   |
| NM_014423 | AFF4   | 3718 | 3766 | 6.83258616807  |
| NM_014423 | AFF4   | 5333 | 5408 | 5.2516412673   |
| NM_014423 | AFF4   | 5048 | 5109 | 5.25164125997  |
| NM_014423 | AFF4   | 3889 | 3939 | 6.2514675172   |
| NM_014423 | AFF4   | 7727 | 7799 | 6.2516410316   |
| NM_014423 | AFF4   | 6205 | 6269 | 6.83660376802  |
| NM_014423 | AFF4   | 4388 | 4438 | 6.83643001792  |
| NM_014423 | AFF4   | 5753 | 5826 | 6.2516412673   |
| NM_014423 | AFF4   | 398  | 469  | 6.24762366735  |
| NM_014423 | AFF4   | 9165 | 9237 | 5.24762366735  |
| NM_014423 | AFF4   | 3409 | 3453 | 6.24762366735  |
| NM_014423 | AFF4   | 7633 | 7679 | 6.16750205814  |
| NM_014423 | AFF4   | 5834 | 5886 | 6.24762366735  |
| NM_014423 | AFF4   | 4266 | 4340 | 5.25164126751  |
| NM_014423 | AFF4   | 4889 | 4969 | 5.25164125997  |
| NM_005049 | PWP2   | 1488 | 1548 | 7.440768111    |
| NM_005049 | PWP2   | 474  | 506  | 6.52088972021  |
| NM_005049 | PWP2   | 2140 | 2198 | 6.440768111    |
| NM_005049 | PWP2   | 509  | 550  | 8.440768111    |
| NM_005049 | PWP2   | 1913 | 1952 | 6.440768111    |
| NM_005049 | PWP2   | 606  | 706  | 7.52490732038  |
| NM_005049 | PWP2   | 991  | 1057 | 8.10585222093  |
| NM_005049 | PWP2   | 1695 | 1825 | 8.52490732038  |
| NM_005049 | PWP2   | 173  | 256  | 8.10986958519  |
| NM_014426 | SNX5   | 565  | 633  | 3.51960634719  |
| NM_014426 | SNX5   | 1844 | 1913 | 0.934643846468 |
| NM_014426 | SNX5   | 1420 | 1464 | 1.93463711541  |
| NM_014426 | SNX5   | 1317 | 1375 | 2.93464361055  |
| NM_014426 | SNX5   | 969  | 1092 | 3.74199876853  |
| NM_014426 | SNX5   | 1744 | 1826 | 2.93464384625  |
| NM_014426 | SNX5   | 1155 | 1304 | 2.93464384647  |
| NM_014426 | SNX5   | 662  | 923  | 5.25657194136  |
| NM_014426 | SNX5   | 387  | 503  | 3.51960634719  |
| NM_014426 | SNX5   | 1473 | 1614 | 3.51960634719  |
| NM_005733 | KIF20A | 2263 | 2352 | 7.36882920328  |
| NM_005733 | KIF20A | 3058 | 3148 | 5.7838599715   |
| NM_005733 | KIF20A | 2835 | 2914 | 6.78386670256  |
| NM_005733 | KIF20A | 906  | 978  | 7.36882920306  |
| NM_005733 | KIF20A | 659  | 715  | 6.77984910238  |
| NM_005733 | KIF20A | 1383 | 1468 | 7.36882920328  |
| NM_005733 | KIF20A | 1497 | 1571 | 7.36882920328  |
| NM_005733 | KIF20A | 542  | 649  | 8.953791704    |
| NM_005733 | KIF20A | 1785 | 2004 | 8.78386670256  |
| NM_005733 | KIF20A | 1084 | 1119 | 5.69972749317  |
| NM_005733 | KIF20A | 718  | 850  | 7.78386670256  |

|           |         |      |      |               |
|-----------|---------|------|------|---------------|
| NM_005733 | KIF20A  | 1707 | 1772 | 6.78386670233 |
| NM_005730 | CTDSP2  | 3808 | 3858 | 4.88556199646 |
| NM_005730 | CTDSP2  | 4566 | 4636 | 7.20749009889 |
| NM_005730 | CTDSP2  | 2049 | 2128 | 5.885562004   |
| NM_005730 | CTDSP2  | 3112 | 3191 | 4.885562004   |
| NM_005730 | CTDSP2  | 3258 | 3331 | 3.88556176809 |
| NM_005730 | CTDSP2  | 3558 | 3635 | 3.88154440383 |
| NM_005730 | CTDSP2  | 4831 | 4913 | 4.885562004   |
| NM_005730 | CTDSP2  | 2907 | 2960 | 3.88556200378 |
| NM_005730 | CTDSP2  | 1703 | 1758 | 4.88538825369 |
| NM_005730 | CTDSP2  | 1155 | 1197 | 3.80142279462 |
| NM_005730 | CTDSP2  | 1867 | 1925 | 6.20749009867 |
| NM_005730 | CTDSP2  | 813  | 868  | 4.88538825369 |
| NM_005730 | CTDSP2  | 1229 | 1338 | 5.885562004   |
| NM_005730 | CTDSP2  | 2269 | 2364 | 4.885562004   |
| NM_005730 | CTDSP2  | 1985 | 2025 | 4.80142279462 |
| NM_005730 | CTDSP2  | 712  | 798  | 5.47052450473 |
| NM_005730 | CTDSP2  | 953  | 1027 | 5.47052449718 |
| NM_005730 | CTDSP2  | 1467 | 1613 | 6.69291692606 |
| NM_005730 | CTDSP2  | 2408 | 2531 | 6.20749009889 |
| NM_005730 | CTDSP2  | 4256 | 4313 | 5.38638529534 |
| NM_005730 | CTDSP2  | 1647 | 1694 | 4.80142279462 |
| NM_005047 | PSMD5   | 436  | 495  | 8.07978888157 |
| NM_005047 | PSMD5   | 550  | 619  | 6.07577151731 |
| NM_005047 | PSMD5   | 268  | 348  | 7.07978888157 |
| NM_005047 | PSMD5   | 1020 | 1102 | 7.07577151731 |
| NM_005047 | PSMD5   | 1653 | 1693 | 6.07577151731 |
| NM_005047 | PSMD5   | 1172 | 1308 | 7.66475161821 |
| NM_005040 | PRCP    | 207  | 278  | 7.73480814797 |
| NM_005040 | PRCP    | 1149 | 1205 | 7.14984564724 |
| NM_005040 | PRCP    | 2029 | 2118 | 7.73480814797 |
| NM_005040 | PRCP    | 1220 | 1350 | 10.1498456472 |
| NM_005040 | PRCP    | 1049 | 1146 | 9.14984564724 |
| NM_005040 | PRCP    | 285  | 372  | 7.73480814797 |
| NM_005040 | PRCP    | 1411 | 1456 | 8.14984564702 |
| NM_005040 | PRCP    | 677  | 762  | 9.14984564724 |
| NM_005040 | PRCP    | 1692 | 1763 | 7.73480814797 |
| NM_005040 | PRCP    | 842  | 1020 | 9.73480814797 |
| NM_005040 | PRCP    | 762  | 826  | 6.1498456397  |
| NM_005040 | PRCP    | 1463 | 1669 | 10.3977731607 |
| NM_005040 | PRCP    | 404  | 577  | 10.0567362429 |
| NM_147202 | C9orf25 | 1777 | 1860 | 9.9681184855  |
| NM_147202 | C9orf25 | 569  | 657  | 10.3831559846 |
| NM_147202 | C9orf25 | 2225 | 2351 | 10.3831559848 |
| NM_005735 | ACTR1B  | 1803 | 1858 | 6.0929618301  |
| NM_005735 | ACTR1B  | 301  | 339  | 4.68689476175 |
| NM_005735 | ACTR1B  | 621  | 712  | 4.76701637096 |
| NM_005735 | ACTR1B  | 420  | 477  | 3.76701637096 |
| NM_005735 | ACTR1B  | 872  | 914  | 3.68689476175 |
| NM_005735 | ACTR1B  | 1176 | 1261 | 4.77103397113 |



|              |        |      |      |                |
|--------------|--------|------|------|----------------|
| NM_005735    | ACTR1B | 717  | 809  | 5.3559897408   |
| NM_176869    | PPA2   | 272  | 364  | 9.87574846937  |
| NM_176869    | PPA2   | 1011 | 1049 | 7.28676836848  |
| NM_001172303 | MASTL  | 2199 | 2254 | 6.97050706705  |
| NM_004162    | RAB5A  | 855  | 910  | 4.50939392644  |
| NM_004162    | RAB5A  | 529  | 567  | 5.42927231723  |
| NM_001077703 | MIER1  | 1043 | 1085 | 4.10404928379  |
| NM_001747    | CAPG   | 1138 | 1282 | 12.1312692645  |
| NM_001294    | CLPTM1 | 319  | 391  | 7.30279007098  |
| NM_001294    | CLPTM1 | 1071 | 1126 | 4.49543514892  |
| NM_001294    | CLPTM1 | 1132 | 1325 | 7.95486676756  |
| NM_001294    | CLPTM1 | 236  | 313  | 3.49543514892  |
| NM_001294    | CLPTM1 | 1957 | 1978 | 4.99625844026  |
| NM_001294    | CLPTM1 | 2323 | 2422 | 6.95486676756  |
| NM_001294    | CLPTM1 | 1328 | 1953 | 10.018997105   |
| NM_001294    | CLPTM1 | 432  | 1071 | 9.64518226843  |
| NM_001294    | CLPTM1 | 2150 | 2274 | 6.81736324381  |
| NM_001743    | CALM2  | 1112 | 1188 | -1.72151720127 |
| NM_001743    | CALM2  | 505  | 1083 | 4.06386011242  |
| NM_001743    | CALM2  | 110  | 503  | 3.56790261776  |
| NM_001293    | CLNS1A | 344  | 396  | 1.29121847753  |
| NM_001293    | CLNS1A | 206  | 269  | 2.87618770908  |
| NM_001293    | CLNS1A | 1053 | 1122 | 4.09858013064  |
| NM_001293    | CLNS1A | 272  | 338  | 3.61315330347  |
| NM_001293    | CLNS1A | 41   | 98   | 1.29122497266  |
| NM_001293    | CLNS1A | 398  | 555  | 3.29122520858  |
| NM_012198    | GCA    | 1496 | 1573 | 5.17077030372  |
| NM_012198    | GCA    | 370  | 491  | 6.17077053942  |
| NM_001748    | CAPN2  | 3060 | 3159 | 9.46572374022  |
| NM_001748    | CAPN2  | 2131 | 2175 | 9.46572374021  |
| NM_001748    | CAPN2  | 2648 | 2702 | 7.46170614004  |
| NM_001748    | CAPN2  | 2436 | 2487 | 7.4655499899   |
| NM_001748    | CAPN2  | 1090 | 1153 | 8.46571700916  |
| NM_001748    | CAPN2  | 2961 | 3004 | 7.38158453083  |
| NM_001748    | CAPN2  | 1053 | 1089 | 8.46571700916  |
| NM_001748    | CAPN2  | 2194 | 2328 | 10.4657237402  |
| NM_001748    | CAPN2  | 2329 | 2433 | 10.0506862409  |
| NM_001748    | CAPN2  | 1299 | 1428 | 9.05068624094  |
| NM_001748    | CAPN2  | 1157 | 1274 | 9.7876518351   |
| NM_001748    | CAPN2  | 169  | 217  | 7.46571700916  |
| NM_001748    | CAPN2  | 887  | 995  | 7.46572374022  |
| NM_001748    | CAPN2  | 1943 | 2111 | 10.9251553589  |
| NM_001748    | CAPN2  | 1668 | 1895 | 11.2730786623  |
| NM_001748    | CAPN2  | 1480 | 1555 | 7.4655499899   |
| NM_022473    | ZFP106 | 3094 | 3166 | 7.06305540963  |
| NM_022473    | ZFP106 | 2706 | 2742 | 7.64784416758  |
| NM_022473    | ZFP106 | 5797 | 5862 | 7.64801791035  |
| NM_022473    | ZFP106 | 4818 | 4886 | 7.06305541717  |
| NM_022473    | ZFP106 | 5537 | 5579 | 6.97891620779  |
| NM_022473    | ZFP106 | 3644 | 3705 | 7.059037817    |

|              |         |      |      |               |
|--------------|---------|------|------|---------------|
| NM_022473    | ZFP106  | 7185 | 7253 | 7.06305541695 |
| NM_022473    | ZFP106  | 3467 | 3528 | 6.059037817   |
| NM_022473    | ZFP106  | 4467 | 4527 | 6.06305540963 |
| NM_022473    | ZFP106  | 5357 | 5402 | 6.059037817   |
| NM_022473    | ZFP106  | 3994 | 4075 | 6.06305541695 |
| NM_022473    | ZFP106  | 890  | 947  | 5.97891620779 |
| NM_022473    | ZFP106  | 5243 | 5330 | 7.64801791767 |
| NM_022473    | ZFP106  | 8352 | 8403 | 7.059037817   |
| NM_022473    | ZFP106  | 9033 | 9127 | 6.06305540963 |
| NM_022473    | ZFP106  | 5462 | 5536 | 7.059037817   |
| NM_022473    | ZFP106  | 2248 | 2355 | 7.06304868612 |
| NM_022473    | ZFP106  | 8711 | 8788 | 7.06305518126 |
| NM_022473    | ZFP106  | 3716 | 3828 | 7.06305541718 |
| NM_022473    | ZFP106  | 5583 | 5667 | 8.38498351206 |
| NM_022473    | ZFP106  | 633  | 706  | 6.059037817   |
| NM_138794    | LYPLAL1 | 108  | 172  | 7.93450396897 |
| NM_022474    | MPP5    | 1238 | 1293 | 6.13735853905 |
| NM_182685    | EFNA1   | 194  | 312  | 6.62154813607 |
| NM_182685    | EFNA1   | 574  | 657  | 6.62154813607 |
| NM_182685    | EFNA1   | 103  | 181  | 6.20651040088 |
| NM_022900    | CASD1   | 600  | 698  | 7.32520657384 |
| NM_022900    | CASD1   | 1705 | 1750 | 7.90615171031 |
| NM_022900    | CASD1   | 1233 | 1291 | 6.32520657384 |
| NM_022900    | CASD1   | 932  | 965  | 7.24106760037 |
| NM_021645    | UTP14C  | 182  | 267  | 7.09309459156 |
| NM_020901    | PHRF1   | 2466 | 2501 | 7.120703539   |
| NM_020901    | PHRF1   | 568  | 655  | 8.12472113917 |
| NM_020901    | PHRF1   | 3924 | 3992 | 7.120703539   |
| NM_020902    | CAMSAP3 | 1123 | 1194 | 9.16039401318 |
| NM_020902    | CAMSAP3 | 1196 | 1280 | 6.83846591829 |
| NM_020902    | CAMSAP3 | 3227 | 3293 | 8.42342841901 |
| NM_020902    | CAMSAP3 | 3946 | 4047 | 6.83846591829 |
| NM_020902    | CAMSAP3 | 2761 | 2817 | 7.83846591074 |
| NM_020902    | CAMSAP3 | 2480 | 2543 | 8.42342841901 |
| NM_020902    | CAMSAP3 | 3344 | 3397 | 6.83444831812 |
| NM_020902    | CAMSAP3 | 608  | 657  | 6.83829216797 |
| NM_020902    | CAMSAP3 | 1298 | 1441 | 9.16039401318 |
| NM_020902    | CAMSAP3 | 542  | 599  | 7.75432670891 |
| NM_020902    | CAMSAP3 | 3889 | 3943 | 7.83845918724 |
| NM_020902    | CAMSAP3 | 3488 | 3600 | 9.42342841901 |
| NM_020902    | CAMSAP3 | 3033 | 3106 | 7.83846591829 |
| NM_020902    | CAMSAP3 | 3639 | 3765 | 6.83846591829 |
| NM_020902    | CAMSAP3 | 1447 | 1502 | 6.83846591829 |
| NM_020902    | CAMSAP3 | 833  | 1099 | 10.5389056364 |
| NM_020902    | CAMSAP3 | 133  | 222  | 7.83846591829 |
| NM_001146698 | RBM19   | 1875 | 1938 | 7.17841924912 |
| NM_001146698 | RBM19   | 207  | 260  | 6.50931753902 |
| NM_001146698 | RBM19   | 333  | 413  | 7.1784192489  |
| NM_001146698 | RBM19   | 1295 | 1363 | 5.59345651248 |
| NM_001146698 | RBM19   | 80   | 192  | 6.5934567484  |

|              |          |      |      |               |               |
|--------------|----------|------|------|---------------|---------------|
| NM_001146698 | RBM19    | 1100 | 1205 | 5.5934567484  |               |
| NM_013995    | LAMP2    | 1990 | 2076 | 6.71203684031 |               |
| NM_013995    | LAMP2    | 3388 | 3429 | 4.3901087452  |               |
| NM_013995    | LAMP2    | 2324 | 2391 | 5.97507124614 |               |
| NM_013995    | LAMP2    | 3179 | 3214 | 4.3901087452  |               |
| NM_013995    | LAMP2    | 3996 | 4037 | 4.39010874542 |               |
| NM_013995    | LAMP2    | 2116 | 2202 | 6.97507124614 |               |
| NM_013995    | LAMP2    | 1307 | 1461 | 9.24808974055 |               |
| NM_013995    | LAMP2    | 1152 | 1307 | 9.09054846356 |               |
| NM_013995    | LAMP2    | 3023 | 3075 | 7.3901087452  |               |
| NM_013995    | LAMP2    | 1695 | 1973 | 9.47757158667 |               |
| NM_013995    | LAMP2    | 1495 | 1685 | 8.39010874542 |               |
| NM_013995    | LAMP2    | 56   | 334  | 9.47757158667 |               |
| NM_013995    | LAMP2    | 3845 | 3894 | 5.97489749582 |               |
| NM_013995    | LAMP2    | 2816 | 2970 | 4.39010874542 |               |
| NM_013995    | LAMP2    | 341  | 1120 | 11.4453911809 |               |
| NM_016166    | PIAS1    | 400  | 479  | 6.88889654167 |               |
| NM_016166    | PIAS1    | 1611 | 1689 | 5.88889654167 |               |
| NM_016166    | PIAS1    | 985  | 1064 | 6.88889677759 |               |
| NM_001033047 | NPNT     | 844  | 892  | 10.7419034055 |               |
| NM_001033047 | NPNT     | 1205 | 1306 | 9.74191013652 |               |
| NM_001033047 | NPNT     | 542  | 613  | 11.5492650586 |               |
| NM_001033047 | NPNT     | 1050 | 1109 | 10.3228550371 |               |
| NM_001033047 | NPNT     | 615  | 662  | 8.7417363862  |               |
| NM_001033047 | NPNT     | 926  | 973  | 8.7417363862  |               |
| NM_001033047 | NPNT     | 761  | 831  | 10.3268724013 |               |
| NM_001033047 | NPNT     | 4322 | 4356 | 8.7417363862  |               |
| NM_001033047 | NPNT     | 1756 | 1824 | 9.7417363862  |               |
| NM_001033047 | NPNT     | 2353 | 2431 | 9.74191013652 |               |
| NM_001033047 | NPNT     | 1857 | 1964 | 11.5492650586 |               |
| NM_001033047 | NPNT     | 1429 | 1600 | 11.3268726372 |               |
| NM_001033046 | C17orf62 |      | 330  | 386           | 8.96457473835 |
| NM_001033046 | C17orf62 |      | 112  | 171           | 7.37961200926 |
| NM_013993    | DDR1     | 1230 | 1270 | 7.66876520689 |               |
| NM_013993    | DDR1     | 3407 | 3466 | 8.75290441627 |               |
| NM_013993    | DDR1     | 352  | 427  | 9.75290441627 |               |
| NM_013993    | DDR1     | 3579 | 3652 | 10.0748325112 |               |
| NM_013993    | DDR1     | 2864 | 2943 | 9.33786691677 |               |
| NM_013993    | DDR1     | 3764 | 3808 | 8.75290441605 |               |
| NM_013993    | DDR1     | 3281 | 3355 | 7.75290441605 |               |
| NM_013993    | DDR1     | 3671 | 3725 | 9.75290441627 |               |
| NM_013993    | DDR1     | 1017 | 1109 | 9.75290441627 |               |
| NM_013993    | DDR1     | 2713 | 2794 | 9.75290441627 |               |
| NM_013993    | DDR1     | 1304 | 1389 | 9.33786691699 |               |
| NM_013993    | DDR1     | 1582 | 1673 | 9.33786691699 |               |
| NM_013993    | DDR1     | 640  | 670  | 8.66876520689 |               |
| NM_013993    | DDR1     | 674  | 769  | 9.33786691699 |               |
| NM_013993    | DDR1     | 2264 | 2382 | 11.2123360349 |               |
| NM_013993    | DDR1     | 776  | 932  | 10.9228294177 |               |
| NM_013993    | DDR1     | 1719 | 1793 | 8.75290418035 |               |

|              |         |      |      |               |
|--------------|---------|------|------|---------------|
| NM_013993    | DDR1    | 2535 | 2644 | 10.337866917  |
| NM_013993    | DDR1    | 3474 | 3574 | 9.75290441627 |
| NM_013993    | DDR1    | 2185 | 2234 | 7.66876520689 |
| NM_013993    | DDR1    | 132  | 226  | 9.33786691699 |
| NM_013993    | DDR1    | 932  | 1015 | 8.75290441627 |
| NM_013993    | DDR1    | 486  | 587  | 7.75290418035 |
| NM_013993    | DDR1    | 236  | 339  | 9.75290441627 |
| NM_001008661 | CCBL2   | 670  | 740  | 9.57161300174 |
| NM_001008661 | CCBL2   | 520  | 574  | 7.99066137014 |
| NM_001008661 | CCBL2   | 1075 | 1154 | 9.57563060169 |
| NM_001008660 | PICALM  | 2459 | 2573 | 6.45599013906 |
| NM_001008660 | PICALM  | 790  | 857  | 6.13405531312 |
| NM_001008660 | PICALM  | 1602 | 1659 | 7.13406204417 |
| NM_001008660 | PICALM  | 1246 | 1291 | 5.13406180825 |
| NM_001008660 | PICALM  | 2219 | 2313 | 7.13406204417 |
| NM_001008660 | PICALM  | 642  | 731  | 5.71902454489 |
| NM_001008660 | PICALM  | 2063 | 2135 | 6.04992283479 |
| NM_001008660 | PICALM  | 2345 | 2405 | 5.71902454489 |
| NM_001008660 | PICALM  | 3355 | 3455 | 6.45599013906 |
| NM_001008660 | PICALM  | 756  | 790  | 5.63488533551 |
| NM_001008660 | PICALM  | 1661 | 1861 | 7.45599013906 |
| NM_001008660 | PICALM  | 920  | 1005 | 6.13406203662 |
| NM_001008660 | PICALM  | 257  | 363  | 6.13406204417 |
| NM_001008660 | PICALM  | 1292 | 1356 | 4.13388829385 |
| NM_001008660 | PICALM  | 1514 | 1558 | 4.04992283479 |
| NM_001040185 | ZNF765  | 149  | 260  | 10.7794701382 |
| NM_001040183 | CLDND1  | 762  | 848  | 7.59340343033 |
| NM_001040183 | CLDND1  | 652  | 730  | 8.0788302575  |
| NM_001040183 | CLDND1  | 605  | 651  | 6.18733612606 |
| NM_001040183 | CLDND1  | 862  | 979  | 7.85643783617 |
| NM_007045    | FGFR10P | 266  | 324  | 5.16565299256 |
| NM_007045    | FGFR10P | 186  | 261  | 4.16582001183 |
| NM_007045    | FGFR10P | 1614 | 1669 | 5.16180914271 |
| NM_172037    | RDH10   | 70   | 127  | 7.66031910861 |
| NM_172037    | RDH10   | 1845 | 1924 | 9.744458318   |
| NM_172037    | RDH10   | 1989 | 2077 | 9.744458318   |
| NM_172037    | RDH10   | 2632 | 2743 | 9.74445831778 |
| NM_172037    | RDH10   | 176  | 257  | 8.744458318   |
| NM_172037    | RDH10   | 1775 | 1825 | 10.5518132401 |
| NM_172037    | RDH10   | 2901 | 2992 | 9.744458318   |
| NM_172037    | RDH10   | 2745 | 2814 | 10.066386177  |
| NM_172037    | RDH10   | 328  | 378  | 7.74044071783 |
| NM_172037    | RDH10   | 1524 | 1659 | 11.4448980361 |
| NM_172037    | RDH10   | 688  | 768  | 10.3294208187 |
| NM_172037    | RDH10   | 2077 | 2287 | 10.9143833194 |
| NM_172037    | RDH10   | 1699 | 1748 | 9.32941408767 |
| NM_172037    | RDH10   | 2389 | 2422 | 8.74445158695 |
| NM_172037    | RDH10   | 2494 | 2528 | 7.74445808208 |
| NM_172037    | RDH10   | 3014 | 3156 | 10.5518132401 |
| NM_172037    | RDH10   | 775  | 1524 | 14.1020103226 |

|           |        |      |      |               |
|-----------|--------|------|------|---------------|
| NM_016343 | CENPF  | 8592 | 8653 | 6.23548327031 |
| NM_016343 | CENPF  | 3466 | 3530 | 5.23548327053 |
| NM_016343 | CENPF  | 9069 | 9126 | 5.23547653948 |
| NM_016343 | CENPF  | 1043 | 1118 | 5.23547653948 |
| NM_016343 | CENPF  | 2678 | 2721 | 5.82044577103 |
| NM_016343 | CENPF  | 531  | 607  | 6.23548326298 |
| NM_016343 | CENPF  | 4087 | 4140 | 4.23548327052 |
| NM_016343 | CENPF  | 8880 | 8948 | 5.23146567036 |
| NM_016343 | CENPF  | 5514 | 5563 | 5.8204457637  |
| NM_016343 | CENPF  | 5037 | 5108 | 4.23547653948 |
| NM_016343 | CENPF  | 5405 | 5465 | 5.82027202093 |
| NM_016343 | CENPF  | 929  | 959  | 4.15134406115 |
| NM_016343 | CENPF  | 4656 | 4699 | 4.23547653948 |
| NM_016343 | CENPF  | 5164 | 5221 | 4.23548326298 |
| NM_016343 | CENPF  | 4595 | 4635 | 4.23548303461 |
| NM_016343 | CENPF  | 9372 | 9442 | 4.23547653948 |
| NM_016343 | CENPF  | 4423 | 4578 | 7.23548327053 |
| NM_016343 | CENPF  | 3562 | 3647 | 5.23547653948 |
| NM_016343 | CENPF  | 4294 | 4371 | 6.82044577125 |
| NM_016343 | CENPF  | 6197 | 6273 | 7.04283819259 |
| NM_016343 | CENPF  | 5239 | 5291 | 4.23548303461 |
| NM_016343 | CENPF  | 7831 | 7894 | 4.23146567036 |
| NM_016343 | CENPF  | 5119 | 5146 | 5.15134406115 |
| NM_016343 | CENPF  | 3951 | 4010 | 4.23547653948 |
| NM_016343 | CENPF  | 9558 | 9732 | 7.40540827197 |
| NM_016343 | CENPF  | 8520 | 8592 | 5.82044577125 |
| NM_016343 | CENPF  | 76   | 132  | 4.23530952021 |
| NM_016343 | CENPF  | 2402 | 2471 | 5.82044577125 |
| NM_016343 | CENPF  | 4971 | 5034 | 5.23548326298 |
| NM_016343 | CENPF  | 137  | 273  | 5.23548327053 |
| NM_016343 | CENPF  | 2050 | 2221 | 6.23548327053 |
| NM_016343 | CENPF  | 6274 | 6422 | 5.82044577125 |
| NM_016343 | CENPF  | 1239 | 1295 | 4.23146567036 |
| NM_016343 | CENPF  | 6793 | 6865 | 5.23547653948 |
| NM_016343 | CENPF  | 6489 | 6549 | 4.23146567036 |
| NM_133181 | EPS8L3 | 1804 | 1871 | 6.12428663381 |
| NM_133181 | EPS8L3 | 1261 | 1302 | 5.12411311941 |
| NM_133181 | EPS8L3 | 2044 | 2099 | 6.12428013867 |
| NM_133181 | EPS8L3 | 250  | 300  | 6.12428663381 |
| NM_133181 | EPS8L3 | 859  | 898  | 5.04014766034 |
| NM_133181 | EPS8L3 | 657  | 735  | 5.12428663381 |
| NM_015926 | TEX264 | 805  | 857  | 8.02445673056 |
| NM_015926 | TEX264 | 618  | 679  | 8.60941923129 |
| NM_015926 | TEX264 | 548  | 608  | 8.02445649465 |
| NM_015926 | TEX264 | 1271 | 1312 | 6.94031752118 |
| NM_015926 | TEX264 | 118  | 255  | 9.34638482545 |
| NM_015922 | NSDHL  | 425  | 485  | 8.2584800368  |
| NM_015922 | NSDHL  | 1483 | 1538 | 7.93655194192 |
| NM_015922 | NSDHL  | 219  | 268  | 6.93655170622 |
| NM_015922 | NSDHL  | 632  | 704  | 6.93655194214 |

|              |         |      |      |               |
|--------------|---------|------|------|---------------|
| NM_015922    | NSDHL   | 1162 | 1221 | 5.85241273275 |
| NM_015922    | NSDHL   | 709  | 775  | 6.93655193459 |
| NM_015922    | NSDHL   | 854  | 978  | 8.52151444286 |
| NM_015922    | NSDHL   | 1308 | 1475 | 9.10647694358 |
| NM_015922    | NSDHL   | 578  | 627  | 5.85241273275 |
| NM_178570    | RTN4RL2 | 480  | 561  | 9.23216659071 |
| NM_015920    | RPS27L  | 259  | 333  | 6.94244542667 |
| NM_015920    | RPS27L  | 72   | 127  | 5.13509049706 |
| NM_001101648 | NPC1L1  | 2548 | 2652 | 11.0067711959 |
| NM_001101648 | NPC1L1  | 1150 | 1252 | 10.1587742894 |
| NM_001101648 | NPC1L1  | 144  | 192  | 7.8328285943  |
| NM_001101648 | NPC1L1  | 3209 | 3275 | 9.83684619425 |
| NM_001101648 | NPC1L1  | 4736 | 4763 | 8.75270698509 |
| NM_001101648 | NPC1L1  | 1312 | 1402 | 10.1587742894 |
| NM_001101648 | NPC1L1  | 1070 | 1127 | 8.83684595855 |
| NM_001101648 | NPC1L1  | 3746 | 3830 | 10.4218086952 |
| NM_001101648 | NPC1L1  | 4153 | 4209 | 10.1547566892 |
| NM_001101648 | NPC1L1  | 2654 | 2842 | 11.4218086952 |
| NM_001101648 | NPC1L1  | 4362 | 4448 | 10.1587742894 |
| NM_001101648 | NPC1L1  | 596  | 703  | 10.1587742894 |
| NM_001101648 | NPC1L1  | 2845 | 3184 | 12.2291636173 |
| NM_001101648 | NPC1L1  | 3339 | 3544 | 10.6442011165 |
| NM_001101648 | NPC1L1  | 4858 | 4936 | 7.83684619447 |
| NM_001101648 | NPC1L1  | 785  | 978  | 12.0067711959 |
| NM_001101648 | NPC1L1  | 1840 | 2046 | 11.8368461945 |
| NM_001101648 | NPC1L1  | 3546 | 3623 | 7.83684619425 |
| NM_001101648 | NPC1L1  | 2293 | 2498 | 11.7437367901 |
| NM_001101648 | NPC1L1  | 2092 | 2247 | 10.6442011165 |
| NM_001101648 | NPC1L1  | 1417 | 1787 | 11.8368461945 |
| NM_001101648 | NPC1L1  | 347  | 412  | 9.42180868764 |
| NM_001101648 | NPC1L1  | 3886 | 3929 | 8.83684619425 |
| NM_138408    | GTF3C6  | 376  | 477  | 5.64342296132 |
| NM_138408    | GTF3C6  | 825  | 867  | 4.6434229611  |
| NM_138408    | GTF3C6  | 751  | 812  | 4.6434227254  |
| NM_138408    | GTF3C6  | 151  | 350  | 5.64342296132 |
| NM_138408    | GTF3C6  | 577  | 706  | 5.38038855548 |
| NM_138402    | SP140L  | 2305 | 2377 | 5.61920352338 |
| NM_138402    | SP140L  | 1749 | 1852 | 7.61919679233 |
| NM_138401    | FAM125A | 403  | 446  | 8.53391279064 |
| NM_138401    | FAM125A | 737  | 795  | 8.52989542638 |
| NM_138401    | FAM125A | 116  | 216  | 10.1188755273 |
| NM_138401    | FAM125A | 294  | 389  | 9.11887552728 |
| NM_138400    | NOM1    | 2661 | 2720 | 6.34723882196 |
| NM_138400    | NOM1    | 1620 | 1694 | 7.34740584122 |
| NM_138400    | NOM1    | 641  | 693  | 6.34339497211 |
| NM_138400    | NOM1    | 1071 | 1137 | 7.34723882196 |
| NM_199190    | LARP4   | 5125 | 5220 | 7.73054742322 |
| NM_199190    | LARP4   | 2336 | 2378 | 6.40861932079 |
| NM_199190    | LARP4   | 4212 | 4295 | 6.40844557802 |
| NM_199190    | LARP4   | 6111 | 6212 | 5.40861932079 |

|              |       |      |      |               |
|--------------|-------|------|------|---------------|
| NM_199190    | LARP4 | 4904 | 4947 | 6.40861259728 |
| NM_199190    | LARP4 | 5943 | 5985 | 5.40861932079 |
| NM_199190    | LARP4 | 3517 | 3552 | 6.32448011895 |
| NM_199190    | LARP4 | 5705 | 5769 | 6.40861932834 |
| NM_199190    | LARP4 | 1671 | 1725 | 5.40460172816 |
| NM_199190    | LARP4 | 2178 | 2219 | 6.32448011895 |
| NM_199190    | LARP4 | 1795 | 1846 | 5.40844557802 |
| NM_199190    | LARP4 | 783  | 856  | 5.40844557802 |
| NM_199190    | LARP4 | 2599 | 2655 | 6.99358182151 |
| NM_199190    | LARP4 | 1037 | 1087 | 6.40861932079 |
| NM_199190    | LARP4 | 2049 | 2138 | 5.40861932834 |
| NM_199190    | LARP4 | 3246 | 3337 | 6.40861932811 |
| NM_199190    | LARP4 | 2287 | 2324 | 6.32448011895 |
| NM_199190    | LARP4 | 131  | 250  | 7.40861932834 |
| NM_199190    | LARP4 | 1469 | 1576 | 8.86805094697 |
| NM_199190    | LARP4 | 301  | 386  | 6.99358182906 |
| NM_199190    | LARP4 | 4317 | 4427 | 6.99358182906 |
| NM_199190    | LARP4 | 1954 | 2029 | 6.99340807874 |
| NM_199190    | LARP4 | 1282 | 1378 | 7.40861932834 |
| NM_199190    | LARP4 | 1095 | 1183 | 7.99358182906 |
| NM_199190    | LARP4 | 578  | 731  | 8.99358182906 |
| NM_199190    | LARP4 | 391  | 547  | 8.73054742322 |
| NM_199191    | BRE   | 1165 | 1237 | 7.18180467405 |
| NM_199191    | BRE   | 308  | 445  | 7.18181140511 |
| NM_001123    | ADK   | 631  | 713  | 4.91895621188 |
| NM_001123    | ADK   | 403  | 462  | 7.50409246292 |
| NM_001123    | ADK   | 928  | 980  | 5.91511236203 |
| NM_001123    | ADK   | 1078 | 1159 | 5.91912995465 |
| NM_001123    | ADK   | 475  | 622  | 7.9191299622  |
| NM_001123    | ADK   | 1252 | 1431 | 8.37856158084 |
| NM_001122    | PLIN2 | 148  | 231  | 3.28463968188 |
| NM_001122    | PLIN2 | 1020 | 1070 | 1.86960218238 |
| NM_001122    | PLIN2 | 1677 | 1717 | 1.28062208171 |
| NM_001122    | PLIN2 | 686  | 920  | 4.37210252313 |
| NM_001122    | PLIN2 | 377  | 437  | 2.60656777677 |
| NM_001122    | PLIN2 | 1292 | 1508 | 4.53256719532 |
| NM_001122    | PLIN2 | 941  | 1011 | 2.8696021826  |
| NM_001122    | PLIN2 | 1770 | 1984 | 4.37210252313 |
| NM_001122    | PLIN2 | 1075 | 1270 | 4.19153027749 |
| NM_001122    | PLIN2 | 442  | 683  | 4.60656777677 |
| NM_001122    | PLIN2 | 237  | 376  | 4.09199460394 |
| NM_001164410 | CDK5  | 294  | 323  | 8.45968181192 |
| NM_001164410 | CDK5  | 444  | 481  | 8.45968181192 |
| NM_001164410 | CDK5  | 334  | 436  | 9.78562750698 |
| NM_001127    | AP1B1 | 433  | 490  | 6.33128932829 |
| NM_001127    | AP1B1 | 1330 | 1395 | 6.91625182901 |
| NM_001127    | AP1B1 | 644  | 723  | 6.91625182901 |
| NM_001127    | AP1B1 | 1610 | 1671 | 6.33128259724 |
| NM_001127    | AP1B1 | 501  | 535  | 5.24715011891 |
| NM_001127    | AP1B1 | 2135 | 2176 | 7.33128909237 |

|              |          |      |      |               |                |
|--------------|----------|------|------|---------------|----------------|
| NM_001127    | AP1B1    | 561  | 617  | 6.33111557797 |                |
| NM_001127    | AP1B1    | 1164 | 1207 | 5.24715011891 |                |
| NM_001127    | AP1B1    | 1717 | 1819 | 6.33111557797 |                |
| NM_001127    | AP1B1    | 928  | 1036 | 8.65321742318 |                |
| NM_001127    | AP1B1    | 1213 | 1330 | 7.33128932829 |                |
| NM_001127    | AP1B1    | 3776 | 3844 | 6.33128932829 |                |
| NM_001127    | AP1B1    | 2572 | 2641 | 6.33128932829 |                |
| NM_001127    | AP1B1    | 3230 | 3323 | 6.33128932829 |                |
| NM_001127    | AP1B1    | 1471 | 1602 | 8.13864425035 |                |
| NM_001127    | AP1B1    | 1410 | 1471 | 6.33111557797 |                |
| NM_001127    | AP1B1    | 1824 | 1906 | 6.91625182901 |                |
| NM_001127    | AP1B1    | 2253 | 2342 | 7.33128932829 |                |
| NM_001127    | AP1B1    | 256  | 312  | 5.33111557797 |                |
| NM_001127    | AP1B1    | 3674 | 3744 | 5.33128259724 |                |
| NM_001127    | AP1B1    | 1090 | 1160 | 6.91624509796 |                |
| NM_001127    | AP1B1    | 147  | 245  | 7.91625182901 |                |
| NM_001127    | AP1B1    | 2701 | 2812 | 5.33128932829 |                |
| NM_001127    | AP1B1    | 3857 | 4036 | 8.33128932829 |                |
| NM_001127    | AP1B1    | 724  | 911  | 7.91625182901 |                |
| NM_018569    | AP1AR    | 1157 | 1235 | 5.12786226294 |                |
| NM_001242501 | MIF4GD   | 441  | 476  | 6.99227957405 |                |
| NM_001242501 | MIF4GD   | 168  | 232  | 6.99227957405 |                |
| NM_001135179 | ZDHHC3   | 1412 | 1462 | 7.81368988288 |                |
| NM_001135179 | ZDHHC3   | 1025 | 1124 | 7.89765534195 |                |
| NM_001135179 | ZDHHC3   | 824  | 952  | 7.31286659155 |                |
| NM_001164145 | ZNF828   | 1698 | 1737 | 7.58651570623 |                |
| NM_001164145 | ZNF828   | 2791 | 2853 | 6.59053330641 |                |
| NM_001164145 | ZNF828   | 1838 | 1894 | 7.58651570623 |                |
| NM_001164145 | ZNF828   | 2502 | 2577 | 7.50639409702 |                |
| NM_001164145 | ZNF828   | 1953 | 1993 | 6.58651570623 |                |
| NM_001164145 | ZNF828   | 2665 | 2716 | 7.59052657535 |                |
| NM_001164145 | ZNF828   | 758  | 889  | 7.59053330641 |                |
| NM_001164145 | ZNF828   | 1311 | 1545 | 7.59053330641 |                |
| NM_007355    | HSP90AB1 |      | 255  | 328           | 0.847201469208 |
| NM_007355    | HSP90AB1 |      | 145  | 251           | 2.43216396993  |
| NM_007355    | HSP90AB1 |      | 333  | 2675          | 7.38247684583  |
| NM_007353    | GNA12    | 4105 | 4158 | 6.78527737905 |                |
| NM_007353    | GNA12    | 1877 | 1933 | 6.86924283812 |                |
| NM_007353    | GNA12    | 1593 | 1673 | 7.86941658821 |                |
| NM_007353    | GNA12    | 2653 | 2708 | 5.86941658843 |                |
| NM_007353    | GNA12    | 3100 | 3136 | 5.86941635251 |                |
| NM_007353    | GNA12    | 957  | 1037 | 6.86941658088 |                |
| NM_007353    | GNA12    | 3794 | 3843 | 5.86924283812 |                |
| NM_007353    | GNA12    | 3248 | 3289 | 6.86940985738 |                |
| NM_007353    | GNA12    | 1936 | 2013 | 7.4543790816  |                |
| NM_007353    | GNA12    | 2955 | 3097 | 7.86941658843 |                |
| NM_007353    | GNA12    | 1707 | 1828 | 7.86941658843 |                |
| NM_007353    | GNA12    | 600  | 750  | 8.86941658843 |                |
| NM_007353    | GNA12    | 1346 | 1572 | 9.32884820707 |                |
| NM_007353    | GNA12    | 502  | 597  | 6.86941658843 |                |



|              |        |      |      |               |
|--------------|--------|------|------|---------------|
| NM_007350    | PHLDA1 | 4634 | 4699 | 6.79732386139 |
| NM_007350    | PHLDA1 | 4105 | 4164 | 5.296493839   |
| NM_007350    | PHLDA1 | 4848 | 4901 | 6.88146307055 |
| NM_007350    | PHLDA1 | 5486 | 5537 | 5.296493839   |
| NM_007350    | PHLDA1 | 2350 | 2473 | 6.88146307077 |
| NM_007350    | PHLDA1 | 1553 | 1632 | 6.88146307077 |
| NM_007350    | PHLDA1 | 226  | 286  | 6.88146307077 |
| NM_007350    | PHLDA1 | 4793 | 4847 | 5.29248296988 |
| NM_007350    | PHLDA1 | 1455 | 1537 | 6.29650057005 |
| NM_007350    | PHLDA1 | 1635 | 1666 | 6.29248296988 |
| NM_007350    | PHLDA1 | 2291 | 2332 | 6.29248296988 |
| NM_007350    | PHLDA1 | 2526 | 2593 | 6.29248296988 |
| NM_007350    | PHLDA1 | 1224 | 1395 | 7.88146307077 |
| NM_007350    | PHLDA1 | 1709 | 1828 | 6.29650057005 |
| NM_007350    | PHLDA1 | 3885 | 3980 | 7.29650057005 |
| NM_007350    | PHLDA1 | 447  | 548  | 5.29650057005 |
| NM_007350    | PHLDA1 | 2159 | 2262 | 7.29650057005 |
| NM_007350    | PHLDA1 | 701  | 898  | 8.29650057005 |
| NM_007350    | PHLDA1 | 3613 | 3713 | 6.88146307077 |
| NM_001263    | CDS1   | 1798 | 1852 | 11.5362721532 |
| NM_001263    | CDS1   | 1259 | 1300 | 11.4521331798 |
| NM_001130528 | SPAG9  | 521  | 597  | 3.23951866357 |
| NM_001130528 | SPAG9  | 2991 | 3074 | 3.23951866357 |
| NM_001130528 | SPAG9  | 3523 | 3604 | 4.2395251587  |
| NM_001130528 | SPAG9  | 1879 | 1976 | 4.2393516443  |
| NM_001130528 | SPAG9  | 2184 | 2284 | 3.23952538707 |
| NM_001130528 | SPAG9  | 3304 | 3404 | 5.82448789534 |
| NM_001130528 | SPAG9  | 1384 | 1471 | 3.2395251587  |
| NM_017694    | MFSD6  | 1759 | 1810 | 12.899276427  |
| NM_017694    | MFSD6  | 333  | 409  | 13.3143139263 |
| NM_017694    | MFSD6  | 2412 | 2484 | 11.314140176  |
| NM_017694    | MFSD6  | 1017 | 1068 | 12.899276427  |
| NM_017694    | MFSD6  | 541  | 617  | 12.8991026767 |
| NM_017694    | MFSD6  | 1125 | 1165 | 12.8952588269 |
| NM_017694    | MFSD6  | 1280 | 1319 | 12.8151372177 |
| NM_017694    | MFSD6  | 2553 | 2608 | 11.2301747169 |
| NM_017694    | MFSD6  | 629  | 677  | 11.3143136904 |
| NM_017694    | MFSD6  | 1893 | 1981 | 13.3143139263 |
| NM_017694    | MFSD6  | 1403 | 1500 | 12.8992764271 |
| NM_017694    | MFSD6  | 467  | 510  | 12.314140176  |
| NM_017694    | MFSD6  | 1326 | 1391 | 11.314140176  |
| NM_017694    | MFSD6  | 2063 | 2139 | 12.3143139263 |
| NM_017694    | MFSD6  | 701  | 802  | 12.3143139263 |
| NM_017694    | MFSD6  | 1685 | 1755 | 11.3102963262 |
| NM_017694    | MFSD6  | 1814 | 1890 | 12.314140176  |
| NM_017694    | MFSD6  | 145  | 193  | 11.3143071953 |
| NM_017694    | MFSD6  | 3812 | 3878 | 11.3143071953 |
| NM_017694    | MFSD6  | 2154 | 2301 | 14.1216688484 |
| NM_001042724 | PVRL2  | 1529 | 1611 | 6.19657118675 |
| NM_001042724 | PVRL2  | 908  | 959  | 8.51849928164 |

|              |         |      |      |               |
|--------------|---------|------|------|---------------|
| NM_001042724 | PVRL2   | 1747 | 1813 | 8.78153368748 |
| NM_001042724 | PVRL2   | 2228 | 2330 | 8.51849928164 |
| NM_001042724 | PVRL2   | 2179 | 2226 | 8.19657118675 |
| NM_001042724 | PVRL2   | 1675 | 1734 | 6.19255358658 |
| NM_001042724 | PVRL2   | 2331 | 2424 | 8.19657118675 |
| NM_001042724 | PVRL2   | 1327 | 1448 | 8.19657118675 |
| NM_001042724 | PVRL2   | 2620 | 2736 | 9.51849928164 |
| NM_001042724 | PVRL2   | 2739 | 2819 | 7.19657118675 |
| NM_001042724 | PVRL2   | 1819 | 1965 | 8.51849928164 |
| NM_001042724 | PVRL2   | 1983 | 2114 | 9.65600280539 |
| NM_001042724 | PVRL2   | 674  | 818  | 7.78153368748 |
| NM_001042724 | PVRL2   | 408  | 635  | 9.8970109049  |
| NM_001042724 | PVRL2   | 959  | 1327 | 11.1965711868 |
| NM_199444    | COPE    | 739  | 808  | 5.86276827652 |
| NM_199444    | COPE    | 81   | 143  | 5.8627680406  |
| NM_199444    | COPE    | 489  | 590  | 7.86276827652 |
| NM_199444    | COPE    | 693  | 726  | 6.86276827629 |
| NM_199444    | COPE    | 179  | 291  | 7.44773077724 |
| NM_199444    | COPE    | 617  | 687  | 6.86276827652 |
| NM_199444    | COPE    | 318  | 453  | 7.44773077724 |
| NM_199440    | HSPD1   | 1815 | 1992 | 3.09841694359 |
| NM_199440    | HSPD1   | 1438 | 1815 | 4.59722280056 |
| NM_199440    | HSPD1   | 116  | 1436 | 6.37575488745 |
| NM_199440    | HSPD1   | 2019 | 2277 | 3.15981748825 |
| NM_000147    | FUCA1   | 1141 | 1183 | 6.73802531779 |
| NM_000147    | FUCA1   | 1743 | 1807 | 8.32299454956 |
| NM_000147    | FUCA1   | 1684 | 1741 | 7.32299454955 |
| NM_000147    | FUCA1   | 439  | 506  | 5.73802531779 |
| NM_000147    | FUCA1   | 978  | 1128 | 9.32299454956 |
| NM_000147    | FUCA1   | 506  | 649  | 8.73803204884 |
| NM_000147    | FUCA1   | 696  | 832  | 8.90795705028 |
| NM_000147    | FUCA1   | 1394 | 1528 | 8.05996014373 |
| NM_000147    | FUCA1   | 1203 | 1380 | 8.5453869709  |
| NM_025082    | CENPT   | 2027 | 2120 | 7.65926366752 |
| NM_025082    | CENPT   | 771  | 821  | 7.65524606734 |
| NM_025081    | NYNRIN  | 1213 | 1281 | 9.10059539717 |
| NM_024682    | TBC1D17 | 367  | 440  | 8.72311736728 |
| NM_024682    | TBC1D17 | 1805 | 1858 | 8.72311736728 |
| NM_024682    | TBC1D17 | 824  | 915  | 10.0450454697 |
| NM_024682    | TBC1D17 | 1583 | 1664 | 8.72311737483 |
| NM_024682    | TBC1D17 | 1681 | 1799 | 8.72311737483 |
| NM_024682    | TBC1D17 | 504  | 625  | 7.72311737483 |
| NM_024865    | NANOG   | 1365 | 1445 | 10.3564175511 |
| NM_003299    | HSP90B1 | 1266 | 2841 | 6.23762038064 |
| NM_003299    | HSP90B1 | 65   | 1256 | 5.26736772404 |
| NM_003298    | NR2C2   | 4685 | 4774 | 6.33686042754 |
| NM_003298    | NR2C2   | 5466 | 5521 | 7.33685370404 |
| NM_003298    | NR2C2   | 1573 | 1622 | 7.92164918549 |
| NM_003298    | NR2C2   | 627  | 720  | 7.92182292826 |
| NM_003298    | NR2C2   | 2307 | 2401 | 6.33686019917 |

|           |       |      |      |               |
|-----------|-------|------|------|---------------|
| NM_017432 | PTOV1 | 987  | 1068 | 5.2824059992  |
| NM_017432 | PTOV1 | 765  | 817  | 4.2824059992  |
| NM_017432 | PTOV1 | 903  | 946  | 4.27838839903 |
| NM_017432 | PTOV1 | 1140 | 1297 | 7.60433409409 |
| NM_017432 | PTOV1 | 465  | 764  | 7.45233100065 |
| NM_003292 | TPR   | 3076 | 3196 | 2.74994930677 |
| NM_003292 | TPR   | 6590 | 6650 | 4.33491180749 |
| NM_003292 | TPR   | 1433 | 1564 | 4.74994930677 |
| NM_003292 | TPR   | 6229 | 6342 | 2.74994930677 |
| NM_003292 | TPR   | 485  | 567  | 2.74593170659 |
| NM_003292 | TPR   | 5638 | 5718 | 4.33089420731 |
| NM_003292 | TPR   | 2755 | 2806 | 2.74593170659 |
| NM_003292 | TPR   | 5110 | 5172 | 2.74994930654 |
| NM_003292 | TPR   | 670  | 771  | 3.74994930677 |
| NM_003292 | TPR   | 6667 | 6720 | 2.74994907085 |
| NM_003292 | TPR   | 1692 | 1720 | 2.66581009738 |
| NM_003292 | TPR   | 382  | 435  | 3.74977555645 |
| NM_003292 | TPR   | 1788 | 1831 | 3.74994907085 |
| NM_003292 | TPR   | 5455 | 5580 | 5.33491180749 |
| NM_003292 | TPR   | 4576 | 4648 | 3.74977555645 |
| NM_003292 | TPR   | 3265 | 3328 | 2.74994907085 |
| NM_003292 | TPR   | 5886 | 5973 | 3.74994257571 |
| NM_003292 | TPR   | 3500 | 3576 | 3.74593170659 |
| NM_003292 | TPR   | 6944 | 7020 | 3.74994930676 |
| NM_003292 | TPR   | 4390 | 4485 | 2.74994929922 |
| NM_003292 | TPR   | 7215 | 7337 | 4.74994930677 |
| NM_003292 | TPR   | 2210 | 2293 | 2.74994907085 |
| NM_003292 | TPR   | 2007 | 2142 | 2.74994930677 |
| NM_003292 | TPR   | 3771 | 3887 | 4.33491180748 |
| NM_003292 | TPR   | 7056 | 7132 | 2.74593170659 |
| NM_003291 | TPP2  | 2033 | 2074 | 6.72384610245 |
| NM_003291 | TPP2  | 797  | 837  | 6.72384610245 |
| NM_003291 | TPP2  | 2426 | 2484 | 6.80798507592 |
| NM_003291 | TPP2  | 4110 | 4168 | 6.80396771166 |
| NM_003291 | TPP2  | 2087 | 2169 | 7.39294781256 |
| NM_003291 | TPP2  | 4487 | 4578 | 7.39277406224 |
| NM_003291 | TPP2  | 3248 | 3331 | 8.12991340672 |
| NM_003291 | TPP2  | 1532 | 1618 | 8.61534023389 |
| NM_003291 | TPP2  | 1045 | 1156 | 7.80798531184 |
| NM_003291 | TPP2  | 1201 | 1235 | 5.72384610245 |
| NM_003291 | TPP2  | 1851 | 1924 | 7.80798531184 |
| NM_003291 | TPP2  | 1646 | 1713 | 7.80798531184 |
| NM_003291 | TPP2  | 661  | 768  | 7.39294781256 |
| NM_003291 | TPP2  | 2708 | 2787 | 7.38893021238 |
| NM_003291 | TPP2  | 3732 | 3815 | 6.80798531183 |
| NM_003291 | TPP2  | 3845 | 3905 | 5.80797858078 |
| NM_003291 | TPP2  | 3575 | 3649 | 8.12991339917 |
| NM_003291 | TPP2  | 79   | 168  | 7.39294780501 |
| NM_003291 | TPP2  | 2177 | 2265 | 7.3929410815  |
| NM_003291 | TPP2  | 1394 | 1460 | 6.80798531183 |

|           |       |      |      |                 |
|-----------|-------|------|------|-----------------|
| NM_003291 | TPP2  | 1245 | 1306 | 7.80798530429   |
| NM_003291 | TPP2  | 1731 | 1843 | 8.12991340672   |
| NM_003291 | TPP2  | 2550 | 2688 | 7.39294781256   |
| NM_003290 | TPM4  | 1943 | 2036 | 2.71437553984   |
| NM_003290 | TPM4  | 1270 | 1343 | 0.714375539844  |
| NM_003290 | TPM4  | 1865 | 1926 | 0.714375539844  |
| NM_003290 | TPM4  | 1344 | 1395 | 0.714375539844  |
| NM_003290 | TPM4  | 1109 | 1167 | 3.29933803302   |
| NM_003290 | TPM4  | 406  | 477  | 2.29933804056   |
| NM_003290 | TPM4  | 1561 | 1630 | 0.714201789526  |
| NM_003290 | TPM4  | 1760 | 1803 | 0.710357939671  |
| NM_003290 | TPM4  | 2194 | 2427 | 4.88430054129   |
| NM_003290 | TPM4  | 1507 | 1551 | 0.710357939671  |
| NM_003290 | TPM4  | 1631 | 1734 | 2.29933804056   |
| NM_003290 | TPM4  | 479  | 576  | 0.714375539844  |
| NM_003290 | TPM4  | 620  | 1094 | 5.5217304619    |
| NM_003290 | TPM4  | 2044 | 2129 | 1.71437530392   |
| NM_003297 | NR2C1 | 591  | 676  | 5.79388321118   |
| NM_003297 | NR2C1 | 702  | 736  | 5.78987234206   |
| NM_003297 | NR2C1 | 2307 | 2367 | 6.79371619191   |
| NM_003297 | NR2C1 | 1808 | 1960 | 7.37885244295   |
| NM_003297 | NR2C1 | 2102 | 2155 | 5.79388321118   |
| NM_017437 | CPSF2 | 304  | 415  | 8.67510139862   |
| NM_017437 | CPSF2 | 31   | 87   | 5.1315305706    |
| NM_017437 | CPSF2 | 2400 | 2457 | 6.21566304893   |
| NM_017437 | CPSF2 | 1088 | 1156 | 8.21566977998   |
| NM_017437 | CPSF2 | 2521 | 2565 | 6.21566304893   |
| NM_017437 | CPSF2 | 1037 | 1073 | 6.21165217981   |
| NM_017437 | CPSF2 | 3373 | 3430 | 5.21566304893   |
| NM_017437 | CPSF2 | 603  | 644  | 5.21549602966   |
| NM_017437 | CPSF2 | 1300 | 1388 | 6.8006322807    |
| NM_017437 | CPSF2 | 2204 | 2267 | 6.21566304893   |
| NM_017437 | CPSF2 | 174  | 272  | 8.38559478142   |
| NM_017437 | CPSF2 | 91   | 129  | 6.1315305706    |
| NM_017437 | CPSF2 | 428  | 568  | 8.02302470204   |
| NM_017437 | CPSF2 | 1880 | 1924 | 5.1315305706    |
| NM_017437 | CPSF2 | 949  | 1035 | 6.21566977997   |
| NM_003295 | TPT1  | 1739 | 1807 | -0.528585686492 |
| NM_003295 | TPT1  | 1672 | 1714 | -1.52859241755  |
| NM_003295 | TPT1  | 487  | 596  | 0.278769235566  |
| NM_003295 | TPT1  | 1145 | 1210 | -1.52858592241  |
| NM_003295 | TPT1  | 977  | 1116 | 0.0563768142295 |
| NM_003295 | TPT1  | 384  | 475  | 0.0563768142295 |
| NM_003295 | TPT1  | 620  | 943  | 3.05637681423   |
| NM_003295 | TPT1  | 135  | 382  | 1.7933424084    |
| NM_004958 | MTOR  | 2967 | 3033 | 7.39988653645   |
| NM_004958 | MTOR  | 2726 | 2760 | 6.39586917219   |
| NM_004958 | MTOR  | 536  | 571  | 7.31574756298   |
| NM_004958 | MTOR  | 1662 | 1758 | 6.39988677214   |
| NM_004958 | MTOR  | 8061 | 8127 | 7.98484926554   |

|              |          |      |      |               |               |
|--------------|----------|------|------|---------------|---------------|
| NM_004958    | MTOR     | 2918 | 2956 | 6.39586917219 |               |
| NM_004958    | MTOR     | 4083 | 4151 | 7.39586917219 |               |
| NM_004958    | MTOR     | 6431 | 6460 | 6.39586917219 |               |
| NM_004958    | MTOR     | 7848 | 7916 | 8.39971302205 |               |
| NM_004958    | MTOR     | 254  | 327  | 7.39586917219 |               |
| NM_004958    | MTOR     | 2556 | 2679 | 8.39988677237 |               |
| NM_004958    | MTOR     | 695  | 727  | 6.31574756298 |               |
| NM_004958    | MTOR     | 4752 | 4800 | 6.39586917219 |               |
| NM_004958    | MTOR     | 1896 | 1980 | 7.98484927309 |               |
| NM_004958    | MTOR     | 5493 | 5552 | 6.31574756298 |               |
| NM_004958    | MTOR     | 3480 | 3647 | 8.39988677237 |               |
| NM_004958    | MTOR     | 2201 | 2307 | 7.39988677237 |               |
| NM_004958    | MTOR     | 1223 | 1397 | 8.72181486725 |               |
| NM_004954    | MARK2    | 4041 | 4067 | 7.51263596209 |               |
| NM_004954    | MARK2    | 2330 | 2393 | 6.00779507058 |               |
| NM_004954    | MARK2    | 1664 | 1721 | 6.01163892043 |               |
| NM_004954    | MARK2    | 1375 | 1499 | 8.33374076564 |               |
| NM_004954    | MARK2    | 1135 | 1181 | 7.59676844042 |               |
| NM_004954    | MARK2    | 827  | 863  | 7.51263596209 |               |
| NM_004954    | MARK2    | 3795 | 3883 | 6.00779507058 |               |
| NM_001142645 | TMEM194B |      | 1510 | 1578          | 8.02253901033 |
| NM_001142645 | TMEM194B |      | 891  | 953           | 8.35343730778 |
| NM_001142645 | TMEM194B |      | 605  | 683           | 8.43757651694 |
| NM_001142645 | TMEM194B |      | 176  | 271           | 8.02253901788 |
| NM_001142645 | TMEM194B |      | 1085 | 1213          | 8.02253901788 |
| NM_001142645 | TMEM194B |      | 700  | 835           | 9.24493143922 |
| NM_001142645 | TMEM194B |      | 995  | 1058          | 8.02253878196 |
| NM_001014839 | NCDN     | 458  | 522  | 10.1966581315 |               |
| NM_001014839 | NCDN     | 3301 | 3426 | 10.7816208681 |               |
| NM_001014839 | NCDN     | 46   | 160  | 11.1966583674 |               |
| NM_175748    | UBR7     | 1158 | 1220 | 6.12452418881 |               |
| NM_001014832 | PAK4     | 2074 | 2144 | 8.3602268655  |               |
| NM_001014832 | PAK4     | 2526 | 2573 | 8.3602268655  |               |
| NM_001014832 | PAK4     | 695  | 756  | 6.77124676461 |               |
| NM_001014832 | PAK4     | 1645 | 1697 | 8.77526436456 |               |
| NM_001014832 | PAK4     | 1731 | 1833 | 9.3602268655  |               |
| NM_001014832 | PAK4     | 406  | 459  | 7.77526436477 |               |
| NM_001014832 | PAK4     | 1483 | 1572 | 7.77526436478 |               |
| NM_006000    | TUBA4A   | 497  | 582  | 10.2471373094 |               |
| NM_006000    | TUBA4A   | 409  | 442  | 10.2431197092 |               |
| NM_006003    | UQCRFS1  | 225  | 266  | 3.56551529822 |               |
| NM_006003    | UQCRFS1  | 909  | 980  | 6.15047803486 |               |
| NM_006003    | UQCRFS1  | 317  | 350  | 5.15030428455 |               |
| NM_006003    | UQCRFS1  | 352  | 421  | 6.73544053559 |               |
| NM_006003    | UQCRFS1  | 855  | 894  | 4.56551529822 |               |
| NM_006003    | UQCRFS1  | 429  | 516  | 6.15047803486 |               |
| NM_006003    | UQCRFS1  | 748  | 830  | 6.15047803486 |               |
| NM_006003    | UQCRFS1  | 528  | 742  | 6.56551553414 |               |
| NM_006002    | UCHL3    | 760  | 829  | 4.84471222851 |               |
| NM_006002    | UCHL3    | 148  | 238  | 5.84872309762 |               |

|           |         |      |      |               |
|-----------|---------|------|------|---------------|
| NM_006002 | UCHL3   | 243  | 327  | 5.84855607836 |
| NM_006002 | UCHL3   | 556  | 618  | 6.43368559835 |
| NM_006002 | UCHL3   | 332  | 506  | 7.84872982868 |
| NM_006005 | WFS1    | 2413 | 2453 | 6.83308097921 |
| NM_006005 | WFS1    | 2811 | 2863 | 7.4182172227  |
| NM_006005 | WFS1    | 963  | 1027 | 6.8332547293  |
| NM_006005 | WFS1    | 1606 | 1750 | 8.41821723024 |
| NM_006005 | WFS1    | 2731 | 2778 | 5.83325472197 |
| NM_006005 | WFS1    | 3177 | 3233 | 8.15518282441 |
| NM_006005 | WFS1    | 3111 | 3157 | 6.82923712935 |
| NM_006005 | WFS1    | 839  | 932  | 6.83325472952 |
| NM_006005 | WFS1    | 515  | 573  | 5.83308097921 |
| NM_006005 | WFS1    | 1143 | 1249 | 7.41821723024 |
| NM_006005 | WFS1    | 1252 | 1517 | 9.64060965158 |
| NM_006005 | WFS1    | 2648 | 2703 | 5.83325472197 |
| NM_006005 | WFS1    | 2935 | 3087 | 8.64060965158 |
| NM_006005 | WFS1    | 1782 | 2169 | 9.83325472952 |
| NM_006004 | UQCRH   | 1    | 78   | 5.19888925558 |
| NM_006004 | UQCRH   | 287  | 377  | 3.02896425391 |
| NM_006004 | UQCRH   | 236  | 284  | 4.02494665396 |
| NM_006004 | UQCRH   | 381  | 505  | 4.61392675486 |
| NM_006559 | KHDRBS1 | 2302 | 2348 | 4.16714193807 |
| NM_006559 | KHDRBS1 | 575  | 652  | 3.16714866158 |
| NM_006559 | KHDRBS1 | 1204 | 1257 | 3.16714866158 |
| NM_006559 | KHDRBS1 | 808  | 918  | 5.48907676402 |
| NM_006559 | KHDRBS1 | 685  | 805  | 6.16714866913 |
| NM_006559 | KHDRBS1 | 2535 | 2604 | 4.16714843321 |
| NM_006559 | KHDRBS1 | 969  | 1189 | 7.48907676402 |
| NM_006559 | KHDRBS1 | 1668 | 1904 | 7.97450359119 |
| NM_006559 | KHDRBS1 | 2605 | 2730 | 5.48907676402 |
| NM_006559 | KHDRBS1 | 185  | 312  | 4.75211116985 |
| NM_006559 | KHDRBS1 | 1404 | 1566 | 5.48907676402 |
| NM_006559 | KHDRBS1 | 329  | 411  | 4.08300945974 |
| NM_006559 | KHDRBS1 | 1966 | 2184 | 5.16714866913 |
| NM_006009 | TUBA1A  | 1044 | 1130 | 9.46654413558 |
| NM_006009 | TUBA1A  | 508  | 620  | 8.88158163486 |
| NM_006009 | TUBA1A  | 1593 | 1698 | 8.24415171424 |
| NM_006009 | TUBA1A  | 855  | 1007 | 9.71808290257 |
| NM_006009 | TUBA1A  | 1368 | 1544 | 9.32215422624 |
| NM_006009 | TUBA1A  | 354  | 487  | 9.0742267128  |
| NM_006009 | TUBA1A  | 1131 | 1344 | 10.1186208322 |
| NM_006009 | TUBA1A  | 637  | 854  | 9.98111730841 |
| NM_003076 | SMARCD1 | 537  | 599  | 7.31648123505 |
| NM_003076 | SMARCD1 | 3269 | 3330 | 5.23234203322 |
| NM_003076 | SMARCD1 | 1974 | 2014 | 5.23234203322 |
| NM_003076 | SMARCD1 | 2200 | 2269 | 6.3164812426  |
| NM_003076 | SMARCD1 | 1344 | 1459 | 6.90144374332 |
| NM_003076 | SMARCD1 | 610  | 657  | 7.63840933748 |
| NM_003076 | SMARCD1 | 2742 | 2794 | 5.23234203322 |
| NM_003076 | SMARCD1 | 1718 | 1801 | 5.3164812426  |

|              |           |      |      |               |               |
|--------------|-----------|------|------|---------------|---------------|
| NM_003076    | SMARCD1   | 2117 | 2170 | 6.901269993   |               |
| NM_003076    | SMARCD1   | 987  | 1047 | 6.23234203322 |               |
| NM_003076    | SMARCD1   | 2487 | 2547 | 5.31246364243 |               |
| NM_003076    | SMARCD1   | 1059 | 1190 | 7.3164812426  |               |
| NM_006555    | YKT6      | 1053 | 1136 | 8.09480428369 |               |
| NM_006555    | YKT6      | 2095 | 2158 | 6.35783868952 |               |
| NM_006555    | YKT6      | 1314 | 1353 | 5.77287595288 |               |
| NM_006555    | YKT6      | 235  | 355  | 8.47331590694 |               |
| NM_006555    | YKT6      | 357  | 442  | 6.35783868952 |               |
| NM_006555    | YKT6      | 1194 | 1238 | 6.35783195847 |               |
| NM_006555    | YKT6      | 2413 | 2499 | 6.3578384536  |               |
| NM_006555    | YKT6      | 2634 | 2764 | 7.94280119024 |               |
| NM_006555    | YKT6      | 1617 | 1807 | 8.35783868952 |               |
| NM_006555    | YKT6      | 2291 | 2413 | 5.7728761888  |               |
| NM_006555    | YKT6      | 894  | 1030 | 7.7728761888  |               |
| NM_006555    | YKT6      | 788  | 880  | 5.7728761888  |               |
| NM_006555    | YKT6      | 442  | 747  | 8.35783868952 |               |
| NM_006555    | YKT6      | 1429 | 1577 | 7.35783868952 |               |
| NM_006555    | YKT6      | 1982 | 2043 | 4.68873697942 |               |
| NM_006554    | MTX2      | 92   | 168  | 6.94153964326 |               |
| NM_006554    | MTX2      | 840  | 895  | 5.61961155592 |               |
| NM_006554    | MTX2      | 720  | 839  | 6.61961155592 |               |
| NM_006554    | MTX2      | 245  | 301  | 6.94153964326 |               |
| NM_006554    | MTX2      | 898  | 1120 | 6.94153965081 |               |
| NM_003071    | HLTF      | 2670 | 2714 | 6.6305432546  |               |
| NM_003071    | HLTF      | 1979 | 2042 | 7.21952334795 |               |
| NM_003071    | HLTF      | 1259 | 1322 | 5.6305432546  |               |
| NM_003071    | HLTF      | 1570 | 1615 | 6.6305432546  |               |
| NM_003071    | HLTF      | 2813 | 2867 | 7.21550575532 |               |
| NM_003071    | HLTF      | 365  | 441  | 6.63456085477 |               |
| NM_001127245 | LRR8A     | 514  | 583  | 7.70949046818 |               |
| NM_001127245 | LRR8A     | 1918 | 1976 | 7.12435421715 |               |
| NM_001127245 | LRR8A     | 715  | 791  | 6.12452796747 |               |
| NM_001127245 | LRR8A     | 1662 | 1780 | 6.12452796747 |               |
| NM_001127245 | LRR8A     | 4056 | 4139 | 8.44645606235 |               |
| NM_001127245 | LRR8A     | 2709 | 2774 | 7.12435421715 |               |
| NM_001127245 | LRR8A     | 460  | 513  | 7.70949046819 |               |
| NM_001127245 | LRR8A     | 2512 | 2563 | 7.12452796724 |               |
| NM_001127245 | LRR8A     | 225  | 344  | 8.12452796747 |               |
| NM_001127245 | LRR8A     | 2110 | 2329 | 7.70949046819 |               |
| NM_001127245 | LRR8A     | 4154 | 4241 | 6.12452796724 |               |
| NM_001127245 | LRR8A     | 1996 | 2073 | 6.12452796724 |               |
| NM_001127245 | LRR8A     | 1012 | 1104 | 8.12452796747 |               |
| NM_001127245 | LRR8A     | 1233 | 1356 | 6.12452796746 |               |
| NM_001127245 | LRR8A     | 1819 | 1898 | 6.12051036729 |               |
| NM_001127241 | BBC3      | 1397 | 1495 | 10.0258712531 |               |
| NM_001127241 | BBC3      | 1175 | 1224 | 8.0258712456  |               |
| NM_021058    | HIST1H2BJ |      | 154  | 253           | 11.6704577366 |
| NM_021058    | HIST1H2BJ |      | 4    | 38            | 10.5863185272 |
| NM_021058    | HIST1H2BJ |      | 278  | 350           | 9.66644013638 |

|              |              |      |     |               |
|--------------|--------------|------|-----|---------------|
| NM_001204818 | LOC100293516 | 345  | 378 | 7.58244231619 |
| NM_001204817 | ZNF587 2002  | 2137 |     | 9.26718368659 |
| NM_001204817 | ZNF587 1247  | 1307 |     | 7.68204743555 |
| NM_005927    | MFAP3 1631   | 1716 |     | 8.9730520785  |
| NM_005927    | MFAP3 63     | 131  |     | 7.75065292611 |
| NM_005927    | MFAP3 1084   | 1136 |     | 7.1656971489  |
| NM_005927    | MFAP3 2293   | 2346 |     | 6.16167955627 |
| NM_005927    | MFAP3 3364   | 3405 |     | 6.16167955627 |
| NM_005927    | MFAP3 439    | 694  |     | 10.2531599977 |
| NM_005927    | MFAP3 914    | 1046 |     | 8.9730520785  |
| NM_005927    | MFAP3 746    | 877  |     | 8.48762525133 |
| NM_005927    | MFAP3 1218   | 1371 |     | 9.48762525133 |
| NM_005927    | MFAP3 137    | 174  |     | 6.08155794706 |
| NM_005927    | MFAP3 240    | 390  |     | 8.75065965717 |
| NM_005926    | MFAP1 1759   | 1832 |     | 3.44639832492 |
| NM_005926    | MFAP1 1322   | 1369 |     | 5.03537169476 |
| NM_005926    | MFAP1 1487   | 1558 |     | 3.44639832492 |
| NM_005926    | MFAP1 104    | 142  |     | 3.45024217477 |
| NM_152400    | C4orf32 447  | 485  |     | 7.56562469813 |
| NM_005921    | MAP3K1 7239  | 7296 |     | 6.85183150966 |
| NM_005921    | MAP3K1 1668  | 1731 |     | 6.8518380048  |
| NM_005921    | MAP3K1 2873  | 2927 |     | 8.43679401038 |
| NM_005921    | MAP3K1 2703  | 2772 |     | 6.8516644904  |
| NM_005921    | MAP3K1 1509  | 1582 |     | 8.43680074121 |
| NM_005921    | MAP3K1 2395  | 2443 |     | 8.43679401038 |
| NM_005921    | MAP3K1 3729  | 3795 |     | 6.84782064054 |
| NM_005921    | MAP3K1 1023  | 1123 |     | 8.85183824049 |
| NM_005921    | MAP3K1 2446  | 2568 |     | 8.43680074144 |
| NM_005921    | MAP3K1 2266  | 2333 |     | 7.8518380048  |
| NM_005921    | MAP3K1 1914  | 1985 |     | 6.85183150966 |
| NM_032139    | ANKRD27 2759 | 2830 |     | 7.22488680927 |
| NM_032139    | ANKRD27 1443 | 1492 |     | 7.22488680927 |
| NM_032139    | ANKRD27 3736 | 3824 |     | 7.30902601843 |
| NM_032139    | ANKRD27 2521 | 2583 |     | 6.3090192876  |
| NM_032139    | ANKRD27 130  | 234  |     | 7.30902601866 |
| NM_032139    | ANKRD27 2842 | 2972 |     | 8.63095411354 |
| NM_032139    | ANKRD27 1777 | 1837 |     | 6.30500841848 |
| NM_014064    | METTTL11A    | 537  | 650 | 8.42038175653 |
| NM_014064    | METTTL11A    | 687  | 771 | 7.09844693059 |
| NM_014064    | METTTL11A    | 445  | 497 | 7.09827991133 |
| NM_001039569 | AP1S3 395    | 451  |     | 8.04767492757 |
| NM_001039569 | AP1S3 770    | 829  |     | 8.04767492757 |
| NM_001039569 | AP1S3 168    | 220  |     | 8.05151877743 |
| NM_006425    | SLU7 1482    | 1541 |     | 5.40470445443 |
| NM_182523    | CMC1 337     | 372  |     | 7.56053162781 |
| NM_001040616 | LINS 1152    | 1186 |     | 10.3594899656 |
| NM_001077397 | IRF2BP2 2684 | 2766 |     | 8.10312800288 |
| NM_001077397 | IRF2BP2 1718 | 1779 |     | 6.6880905036  |
| NM_001077397 | IRF2BP2 1240 | 1305 |     | 5.10295425256 |
| NM_001077397 | IRF2BP2 2619 | 2670 |     | 6.68809049605 |



|              |         |      |      |               |
|--------------|---------|------|------|---------------|
| NM_001077397 | IRF2BP2 | 16   | 175  | 6.10312800288 |
| NM_001077397 | IRF2BP2 | 1977 | 2059 | 8.56255962152 |
| NM_001077397 | IRF2BP2 | 2342 | 2453 | 7.91048292494 |
| NM_001077397 | IRF2BP2 | 1420 | 1571 | 7.10312800288 |
| NM_001077397 | IRF2BP2 | 1785 | 1887 | 7.42505609777 |
| NM_001145860 | POP1    | 1905 | 1988 | 9.82852258278 |
| NM_001145860 | POP1    | 2164 | 2225 | 10.8285158517 |
| NM_001145860 | POP1    | 143  | 208  | 11.4134848476 |
| NM_001145860 | POP1    | 1727 | 1780 | 9.82834883246 |
| NM_001145860 | POP1    | 1366 | 1413 | 11.4094674833 |
| NM_001145860 | POP1    | 3227 | 3284 | 10.8285225826 |
| NM_001145860 | POP1    | 1794 | 1851 | 9.7443833734  |
| NM_001145860 | POP1    | 3385 | 3462 | 10.8285158517 |
| NM_001145860 | POP1    | 2001 | 2047 | 9.82834883246 |
| NM_002651    | PI4KB   | 2260 | 2400 | 9.56258945176 |
| NM_002651    | PI4KB   | 1660 | 1697 | 7.23664375671 |
| NM_002651    | PI4KB   | 2948 | 2995 | 9.56241570145 |
| NM_002651    | PI4KB   | 2668 | 2701 | 7.15652214749 |
| NM_002651    | PI4KB   | 2402 | 2468 | 9.8256238576  |
| NM_002651    | PI4KB   | 1952 | 2015 | 7.24066134933 |
| NM_002651    | PI4KB   | 829  | 883  | 8.82160625743 |
| NM_002651    | PI4KB   | 2796 | 2885 | 8.8256238576  |
| NM_002651    | PI4KB   | 2016 | 2079 | 7.23664375671 |
| NM_002651    | PI4KB   | 973  | 1079 | 9.56258945177 |
| NM_002651    | PI4KB   | 139  | 200  | 8.15652214749 |
| NM_002651    | PI4KB   | 580  | 644  | 8.24066135687 |
| NM_002651    | PI4KB   | 3661 | 3765 | 8.82562385759 |
| NM_002651    | PI4KB   | 1086 | 1161 | 9.82562385759 |
| NM_002651    | PI4KB   | 3448 | 3500 | 7.24066134933 |
| NM_002651    | PI4KB   | 1271 | 1336 | 8.82562385738 |
| NM_079423    | MYL6    | 102  | 759  | 5.93953804147 |
| NM_002653    | PITX1   | 1496 | 1537 | 8.45968321398 |
| NM_002654    | PKM2    | 1519 | 1614 | 3.2937456963  |
| NM_002654    | PKM2    | 2264 | 2500 | 5.18683049238 |
| NM_002654    | PKM2    | 2109 | 2260 | 4.57385361549 |
| NM_002654    | PKM2    | 701  | 1503 | 7.30656973665 |
| NM_002654    | PKM2    | 199  | 697  | 6.57385361549 |
| NM_002654    | PKM2    | 1615 | 2080 | 6.2937456963  |
| NM_002657    | PLAGL2  | 4826 | 4878 | 9.31977064868 |
| NM_002657    | PLAGL2  | 2968 | 3091 | 9.90473314941 |
| NM_002657    | PLAGL2  | 3622 | 3676 | 8.31959689837 |
| NM_002657    | PLAGL2  | 2276 | 2365 | 8.31977064869 |
| NM_002657    | PLAGL2  | 957  | 1001 | 8.31977064846 |
| NM_002657    | PLAGL2  | 1267 | 1351 | 9.64169874335 |
| NM_002657    | PLAGL2  | 855  | 931  | 8.90473291349 |
| NM_002657    | PLAGL2  | 4240 | 4291 | 9.31977064869 |
| NM_002657    | PLAGL2  | 329  | 376  | 8.31575304851 |
| NM_002657    | PLAGL2  | 4031 | 4123 | 9.90473314941 |
| NM_002657    | PLAGL2  | 3934 | 4028 | 7.2356314393  |
| NM_002657    | PLAGL2  | 799  | 853  | 7.31575304851 |

|              |        |      |      |               |
|--------------|--------|------|------|---------------|
| NM_002657    | PLAGL2 | 3094 | 3178 | 9.31977064869 |
| NM_002657    | PLAGL2 | 2206 | 2267 | 7.31575304851 |
| NM_002657    | PLAGL2 | 2385 | 2443 | 8.2356314393  |
| NM_002657    | PLAGL2 | 2598 | 2662 | 7.31977064869 |
| NM_002657    | PLAGL2 | 4558 | 4598 | 7.31575304851 |
| NM_002657    | PLAGL2 | 4203 | 4240 | 8.31575304851 |
| NM_002657    | PLAGL2 | 98   | 185  | 9.90473314941 |
| NM_002657    | PLAGL2 | 2519 | 2577 | 8.31977064114 |
| NM_002657    | PLAGL2 | 1848 | 1969 | 9.64169874357 |
| NM_002657    | PLAGL2 | 1581 | 1685 | 10.3197706487 |
| NM_002657    | PLAGL2 | 4920 | 4998 | 7.31977064868 |
| NM_002657    | PLAGL2 | 2816 | 2937 | 8.90473314941 |
| NM_002657    | PLAGL2 | 2716 | 2809 | 8.31977064869 |
| NM_002657    | PLAGL2 | 3774 | 3858 | 8.31959689837 |
| NM_002657    | PLAGL2 | 1182 | 1264 | 8.31977064869 |
| NM_002657    | PLAGL2 | 1016 | 1089 | 7.31575304851 |
| NM_013436    | NCKAP1 | 4153 | 4240 | 6.05392879458 |
| NM_013436    | NCKAP1 | 3427 | 3547 | 6.46896629386 |
| NM_013436    | NCKAP1 | 3909 | 3968 | 6.05392879458 |
| NM_013436    | NCKAP1 | 2355 | 2430 | 6.05392879458 |
| NM_013436    | NCKAP1 | 2933 | 3018 | 5.05392879458 |
| NM_013436    | NCKAP1 | 2573 | 2614 | 4.46879254354 |
| NM_013436    | NCKAP1 | 4512 | 4564 | 3.4689595628  |
| NM_013436    | NCKAP1 | 1390 | 1455 | 5.0499111944  |
| NM_013436    | NCKAP1 | 1472 | 1556 | 6.05392879458 |
| NM_013436    | NCKAP1 | 1252 | 1355 | 5.46896629386 |
| NM_013436    | NCKAP1 | 1176 | 1218 | 3.4689595628  |
| NM_013436    | NCKAP1 | 1794 | 1862 | 6.05392879458 |
| NM_013436    | NCKAP1 | 1011 | 1168 | 6.46896629386 |
| NM_013436    | NCKAP1 | 4246 | 4349 | 5.79089438874 |
| NM_013436    | NCKAP1 | 1978 | 2148 | 7.37585688946 |
| NM_013436    | NCKAP1 | 3635 | 3700 | 6.27632121591 |
| NM_013436    | NCKAP1 | 3380 | 3426 | 3.46896629385 |
| NM_013436    | NCKAP1 | 854  | 972  | 6.05392879458 |
| NM_013436    | NCKAP1 | 4766 | 4881 | 4.46896629386 |
| NM_013436    | NCKAP1 | 2179 | 2263 | 5.79089438874 |
| NM_013436    | NCKAP1 | 4007 | 4141 | 5.79089438874 |
| NM_013436    | NCKAP1 | 1581 | 1665 | 6.27632121591 |
| NM_013436    | NCKAP1 | 3185 | 3260 | 4.46494869368 |
| NM_013437    | LRP12  | 831  | 895  | 12.3177142375 |
| NM_013437    | LRP12  | 1398 | 1438 | 10.7287408677 |
| NM_013437    | LRP12  | 97   | 144  | 10.7327584677 |
| NM_013437    | LRP12  | 1609 | 1659 | 10.7287408677 |
| NM_013437    | LRP12  | 1278 | 1341 | 10.6486192585 |
| NM_013437    | LRP12  | 513  | 575  | 10.7287408677 |
| NM_013437    | LRP12  | 686  | 755  | 10.7327517368 |
| NM_001190819 | ORC1   | 2597 | 2648 | 9.45324463268 |
| NM_001190819 | ORC1   | 3037 | 3113 | 7.95242134133 |
| NM_001190819 | ORC1   | 424  | 532  | 9.95242134134 |
| NM_013438    | UBQLN1 | 3803 | 3889 | 4.92457734744 |

|              |          |      |      |               |               |
|--------------|----------|------|------|---------------|---------------|
| NM_013438    | UBQLN1   | 1667 | 1738 | 5.00871655682 |               |
| NM_013438    | UBQLN1   | 2222 | 2288 | 5.0087165566  |               |
| NM_013438    | UBQLN1   | 2719 | 2813 | 5.00871655683 |               |
| NM_013438    | UBQLN1   | 4008 | 4047 | 3.33961484672 |               |
| NM_013438    | UBQLN1   | 301  | 346  | 4.41973645593 |               |
| NM_013438    | UBQLN1   | 958  | 1005 | 3.42374732505 |               |
| NM_013438    | UBQLN1   | 2650 | 2697 | 3.42375405588 |               |
| NM_013438    | UBQLN1   | 1778 | 1839 | 4.42375404856 |               |
| NM_013438    | UBQLN1   | 3900 | 3965 | 3.41973645593 |               |
| NM_013438    | UBQLN1   | 3498 | 3617 | 4.42375405588 |               |
| NM_013438    | UBQLN1   | 1839 | 1890 | 3.42374732505 |               |
| NM_013438    | UBQLN1   | 440  | 547  | 6.23110897816 |               |
| NM_013438    | UBQLN1   | 2476 | 2589 | 5.74568215099 |               |
| NM_013438    | UBQLN1   | 2369 | 2466 | 7.12419377425 |               |
| NM_013438    | UBQLN1   | 3129 | 3215 | 5.00871655683 |               |
| NM_013438    | UBQLN1   | 2299 | 2368 | 5.00469895665 |               |
| NM_013438    | UBQLN1   | 1236 | 1377 | 5.42375405611 |               |
| NM_013438    | UBQLN1   | 1021 | 1136 | 6.00871655683 |               |
| NM_013438    | UBQLN1   | 663  | 907  | 6.74568215099 |               |
| NM_013438    | UBQLN1   | 1572 | 1648 | 5.00870982577 |               |
| NM_013438    | UBQLN1   | 2034 | 2190 | 5.74568215099 |               |
| NM_001006634 | ARHGAP17 |      | 2700 | 2769          | 6.05743691909 |
| NM_001006634 | ARHGAP17 |      | 3156 | 3201          | 4.47246792324 |
| NM_001006634 | ARHGAP17 |      | 1125 | 1217          | 6.47247464674 |
| NM_001006634 | ARHGAP17 |      | 193  | 250           | 4.46845705412 |
| NM_001006634 | ARHGAP17 |      | 1422 | 1471          | 6.47246792324 |
| NM_001006634 | ARHGAP17 |      | 957  | 1053          | 5.47247464674 |
| NM_001006634 | ARHGAP17 |      | 387  | 489           | 5.47247465428 |
| NM_001006634 | ARHGAP17 |      | 3202 | 3334          | 6.79440274918 |
| NM_015456    | COBRA1   | 1353 | 1410 | 7.94429889735 |               |
| NM_015456    | COBRA1   | 1084 | 1121 | 7.35916264631 |               |
| NM_015456    | COBRA1   | 901  | 932  | 7.35916264631 |               |
| NM_015456    | COBRA1   | 826  | 883  | 6.35933639663 |               |
| NM_015456    | COBRA1   | 1463 | 1569 | 8.35933639663 |               |
| NM_015456    | COBRA1   | 932  | 979  | 7.35531879646 |               |
| NM_015456    | COBRA1   | 1609 | 1671 | 7.35933639663 |               |
| NM_015456    | COBRA1   | 563  | 642  | 7.35933639663 |               |
| NM_015456    | COBRA1   | 1136 | 1212 | 6.35932966557 |               |
| NM_015457    | ZDHHC5   | 1234 | 1280 | 8.70927698544 |               |
| NM_015457    | ZDHHC5   | 1454 | 1528 | 9.29423948594 |               |
| NM_015457    | ZDHHC5   | 3610 | 3701 | 10.0312050803 |               |
| NM_015457    | ZDHHC5   | 3543 | 3609 | 7.70927025439 |               |
| NM_015457    | ZDHHC5   | 3716 | 3772 | 9.70927698544 |               |
| NM_015457    | ZDHHC5   | 1060 | 1102 | 10.2942394862 |               |
| NM_015457    | ZDHHC5   | 2947 | 3022 | 7.70910323513 |               |
| NM_015457    | ZDHHC5   | 1123 | 1228 | 11.4097167036 |               |
| NM_015457    | ZDHHC5   | 2102 | 2222 | 9.29423947862 |               |
| NM_015457    | ZDHHC5   | 758  | 809  | 9.21010027678 |               |
| NM_015457    | ZDHHC5   | 1968 | 2018 | 7.70525938527 |               |
| NM_015457    | ZDHHC5   | 1619 | 1709 | 7.70927698545 |               |

|              |         |      |      |               |
|--------------|---------|------|------|---------------|
| NM_015457    | ZDHC5   | 2255 | 2298 | 7.70525938527 |
| NM_015457    | ZDHC5   | 819  | 944  | 10.2942394862 |
| NM_015457    | ZDHC5   | 1288 | 1378 | 9.29423948617 |
| NM_015457    | ZDHC5   | 172  | 363  | 9.70927698545 |
| NM_015106    | RAD54L2 | 15   | 124  | 7.77860177141 |
| NM_015455    | CNOT6   | 2526 | 2572 | 7.07009663787 |
| NM_015455    | CNOT6   | 2098 | 2207 | 7.65907673121 |
| NM_015455    | CNOT6   | 568  | 674  | 7.07411423782 |
| NM_015455    | CNOT6   | 777  | 896  | 8.07411423804 |
| NM_015450    | POT1    | 975  | 1018 | 7.39645570206 |
| NM_015450    | POT1    | 2673 | 2711 | 5.73137159213 |
| NM_015450    | POT1    | 1850 | 1908 | 5.81149320134 |
| NM_015450    | POT1    | 873  | 940  | 6.81149320134 |
| NM_015450    | POT1    | 1786 | 1826 | 5.81149320134 |
| NM_015103    | PLXND1  | 5867 | 5931 | 6.04787826806 |
| NM_015103    | PLXND1  | 3940 | 3996 | 7.63267374951 |
| NM_015103    | PLXND1  | 5934 | 5987 | 7.04771124879 |
| NM_015103    | PLXND1  | 5109 | 5157 | 7.63284749228 |
| NM_015103    | PLXND1  | 4088 | 4148 | 6.04788476319 |
| NM_015103    | PLXND1  | 2233 | 2287 | 6.04788476319 |
| NM_015103    | PLXND1  | 5552 | 5660 | 6.04386739894 |
| NM_015103    | PLXND1  | 6399 | 6453 | 8.04788499911 |
| NM_015103    | PLXND1  | 5337 | 5440 | 6.04788499911 |
| NM_015103    | PLXND1  | 3100 | 3166 | 6.04788476319 |
| NM_015103    | PLXND1  | 1403 | 1445 | 7.04787826806 |
| NM_015103    | PLXND1  | 6646 | 6703 | 6.04788499156 |
| NM_015103    | PLXND1  | 3738 | 3815 | 7.04788499911 |
| NM_015103    | PLXND1  | 442  | 520  | 6.04386739894 |
| NM_015103    | PLXND1  | 4946 | 4991 | 6.96374578973 |
| NM_015103    | PLXND1  | 1906 | 1985 | 7.04788499911 |
| NM_015103    | PLXND1  | 6142 | 6204 | 6.96374578973 |
| NM_015103    | PLXND1  | 1996 | 2061 | 6.04788499156 |
| NM_015103    | PLXND1  | 6562 | 6619 | 7.63284749983 |
| NM_015103    | PLXND1  | 2114 | 2184 | 7.04788499889 |
| NM_015103    | PLXND1  | 2438 | 2551 | 7.63284749983 |
| NM_015103    | PLXND1  | 3235 | 3318 | 6.04788499911 |
| NM_015103    | PLXND1  | 1579 | 1656 | 7.63284749983 |
| NM_015103    | PLXND1  | 1792 | 1898 | 7.04788499889 |
| NM_015103    | PLXND1  | 2785 | 2856 | 6.04788499156 |
| NM_015103    | PLXND1  | 4724 | 4870 | 7.63284749983 |
| NM_015103    | PLXND1  | 3534 | 3637 | 6.04788499911 |
| NM_015103    | PLXND1  | 779  | 958  | 8.369813094   |
| NM_015103    | PLXND1  | 4313 | 4389 | 6.04788499911 |
| NM_033260    | FOXQ1   | 2095 | 2130 | 11.3385676777 |
| NM_033260    | FOXQ1   | 1920 | 1980 | 12.3425852779 |
| NM_001015048 | BAG5    | 2816 | 2892 | 6.23759769922 |
| NM_004520    | KIF2A   | 471  | 571  | 8.01294042287 |
| NM_004520    | KIF2A   | 2994 | 3056 | 6.69084530872 |
| NM_019592    | RNF20   | 3276 | 3345 | 6.24931319407 |
| NM_019592    | RNF20   | 42   | 88   | 6.24546934422 |

|              |         |      |      |               |
|--------------|---------|------|------|---------------|
| NM_019592    | RNF20   | 413  | 462  | 4.66435069335 |
| NM_019592    | RNF20   | 3743 | 3809 | 4.66451771261 |
| NM_019592    | RNF20   | 1660 | 1694 | 4.58038523428 |
| NM_019592    | RNF20   | 3081 | 3136 | 4.66050684349 |
| NM_019592    | RNF20   | 167  | 260  | 6.24948694438 |
| NM_019592    | RNF20   | 1579 | 1633 | 4.66050684349 |
| NM_138462    | ZMYND19 | 484  | 548  | 5.27793242613 |
| NM_138462    | ZMYND19 | 222  | 275  | 6.27392155701 |
| NM_138462    | ZMYND19 | 655  | 711  | 5.27392155701 |
| NM_019597    | HNRNPH2 | 579  | 628  | 5.05546730842 |
| NM_019597    | HNRNPH2 | 386  | 534  | 7.38141300348 |
| NM_019597    | HNRNPH2 | 1286 | 1372 | 7.64444740932 |
| NM_019597    | HNRNPH2 | 956  | 1086 | 8.05948490859 |
| NM_019597    | HNRNPH2 | 762  | 809  | 5.05947817754 |
| NM_019597    | HNRNPH2 | 1183 | 1282 | 7.05948490859 |
| NM_138467    | TYW3    | 158  | 209  | 6.16674908486 |
| NM_052925    | LENG8   | 85   | 145  | 7.26992662469 |
| NM_052925    | LENG8   | 3383 | 3432 | 5.26992663224 |
| NM_052925    | LENG8   | 3503 | 3606 | 5.26992663224 |
| NM_052925    | LENG8   | 2648 | 2721 | 6.26992663224 |
| NM_052928    | SMYD4   | 3956 | 4019 | 9.69378214888 |
| NM_052928    | SMYD4   | 2155 | 2219 | 9.6939558992  |
| NM_052928    | SMYD4   | 1752 | 1797 | 9.69378214888 |
| NM_052928    | SMYD4   | 858  | 916  | 11.2749007998 |
| NM_052928    | SMYD4   | 1486 | 1549 | 11.6937821489 |
| NM_005557    | KRT16   | 838  | 876  | 11.5732929675 |
| NM_021959    | PPP1R11 | 1287 | 1347 | 5.13129892544 |
| NM_021959    | PPP1R11 | 745  | 787  | 4.13129868953 |
| NM_021959    | PPP1R11 | 885  | 927  | 4.13112517513 |
| NM_033407    | DOCK7   | 5692 | 5776 | 6.37816143174 |
| NM_033407    | DOCK7   | 2101 | 2151 | 6.29402222236 |
| NM_033407    | DOCK7   | 4078 | 4122 | 5.70905972164 |
| NM_033407    | DOCK7   | 5245 | 5288 | 6.3781614242  |
| NM_033407    | DOCK7   | 3438 | 3491 | 4.79319219997 |
| NM_033407    | DOCK7   | 390  | 446  | 4.78918133085 |
| NM_033407    | DOCK7   | 2183 | 2312 | 7.11512702591 |
| NM_033407    | DOCK7   | 3976 | 4017 | 5.78918133085 |
| NM_033407    | DOCK7   | 4840 | 4915 | 6.7931989308  |
| NM_033407    | DOCK7   | 2314 | 2424 | 4.7931989308  |
| NM_001099789 | ICAM2   | 172  | 228  | 7.95331893585 |
| NM_001099789 | ICAM2   | 293  | 379  | 10.0334405451 |
| NM_001099789 | ICAM2   | 849  | 919  | 9.62224689564 |
| NM_001099784 | FBXL19  | 444  | 531  | 11.8627072847 |
| NM_001099784 | FBXL19  | 291  | 337  | 9.5367615896  |
| NM_001099784 | FBXL19  | 3243 | 3285 | 9.45663998039 |
| NM_001099784 | FBXL19  | 1078 | 1122 | 9.5367615896  |
| NM_001099784 | FBXL19  | 2869 | 2912 | 9.54060543946 |
| NM_001099784 | FBXL19  | 1471 | 1563 | 9.54060543946 |
| NM_001099784 | FBXL19  | 1694 | 1771 | 9.54077245872 |
| NM_001357    | DHX9    | 1168 | 1249 | 7.07551860465 |

|           |         |      |      |               |
|-----------|---------|------|------|---------------|
| NM_001357 | DHX9    | 1062 | 1150 | 6.85312618331 |
| NM_001357 | DHX9    | 3391 | 3488 | 7.96860340073 |
| NM_001357 | DHX9    | 469  | 508  | 5.18402447321 |
| NM_001357 | DHX9    | 4092 | 4140 | 5.85312618331 |
| NM_001357 | DHX9    | 1250 | 1381 | 7.72759530123 |
| NM_001357 | DHX9    | 1390 | 1427 | 5.18402447321 |
| NM_001357 | DHX9    | 56   | 231  | 8.1750542782  |
| NM_001357 | DHX9    | 805  | 1027 | 7.72759530123 |
| NM_001357 | DHX9    | 1851 | 2188 | 10.0495233961 |
| NM_001357 | DHX9    | 265  | 316  | 4.26798993227 |
| NM_001357 | DHX9    | 3773 | 3836 | 6.26816368237 |
| NM_001357 | DHX9    | 1454 | 1822 | 9.76001677892 |
| NM_001357 | DHX9    | 2198 | 2247 | 5.84910858314 |
| NM_001357 | DHX9    | 348  | 467  | 7.07551860465 |
| NM_001357 | DHX9    | 3186 | 3389 | 8.72759530123 |
| NM_001357 | DHX9    | 543  | 787  | 7.72759530123 |
| NM_001357 | DHX9    | 2857 | 3176 | 9.43808868403 |
| NM_001357 | DHX9    | 2329 | 2847 | 10.0755186046 |
| NM_001357 | DHX9    | 3841 | 4038 | 6.59009177748 |
| NM_001357 | DHX9    | 3522 | 3654 | 7.96860340073 |
| NM_001357 | DHX9    | 3669 | 3734 | 5.85312618331 |
| NM_001353 | AKR1C1  | 160  | 290  | 4.88063144165 |
| NM_001353 | AKR1C1  | 1070 | 1284 | 5.67418056419 |
| NM_001353 | AKR1C1  | 297  | 1068 | 7.55870334677 |
| NM_014853 | SGSM2   | 1924 | 1959 | 5.97100222445 |
| NM_014853 | SGSM2   | 2656 | 2699 | 6.05496768351 |
| NM_014853 | SGSM2   | 3136 | 3258 | 7.64010393455 |
| NM_001358 | DHX15   | 2379 | 2456 | 5.94220661223 |
| NM_001358 | DHX15   | 154  | 216  | 4.7198141909  |
| NM_001358 | DHX15   | 2326 | 2375 | 5.7198141909  |
| NM_001358 | DHX15   | 24   | 151  | 5.7198141909  |
| NM_001358 | DHX15   | 2459 | 2665 | 7.7198141909  |
| NM_001358 | DHX15   | 334  | 424  | 4.71981419089 |
| NM_001358 | DHX15   | 1562 | 1632 | 4.7198141909  |
| NM_001358 | DHX15   | 223  | 328  | 4.7198141909  |
| NM_001358 | DHX15   | 2676 | 2825 | 6.83529140832 |
| NM_001358 | DHX15   | 747  | 1216 | 9.26413470712 |
| NM_001358 | DHX15   | 590  | 732  | 6.13485169018 |
| NM_001358 | DHX15   | 1666 | 1948 | 8.6267047865  |
| NM_001358 | DHX15   | 1227 | 1555 | 8.22231453143 |
| NM_001358 | DHX15   | 434  | 587  | 5.94220661223 |
| NM_001358 | DHX15   | 2009 | 2325 | 8.59428330881 |
| NM_001358 | DHX15   | 2844 | 2981 | 6.59428330881 |
| NM_001359 | DECR1   | 860  | 994  | 6.69447461767 |
| NM_001359 | DECR1   | 712  | 769  | 5.37237277247 |
| NM_014856 | DENND4B | 2499 | 2566 | 9.53265540866 |
| NM_014856 | DENND4B | 625  | 695  | 9.5326619038  |
| NM_014856 | DENND4B | 1533 | 1586 | 11.8545902346 |
| NM_014856 | DENND4B | 5129 | 5187 | 9.53265540866 |
| NM_014856 | DENND4B | 5462 | 5548 | 9.53265540866 |

|           |         |      |      |               |
|-----------|---------|------|------|---------------|
| NM_014856 | DENND4B | 1702 | 1803 | 11.8545902346 |
| NM_014856 | DENND4B | 4697 | 4732 | 11.1176179094 |
| NM_014856 | DENND4B | 425  | 474  | 10.5326621322 |
| NM_014856 | DENND4B | 1846 | 1966 | 11.5326621397 |
| NM_014856 | DENND4B | 2307 | 2365 | 9.53266213217 |
| NM_014856 | DENND4B | 3902 | 4001 | 10.5326621397 |
| NM_014856 | DENND4B | 3621 | 3686 | 9.52864453954 |
| NM_014856 | DENND4B | 5597 | 5681 | 10.5326554087 |
| NM_014856 | DENND4B | 2003 | 2061 | 10.5326619038 |
| NM_014856 | DENND4B | 2376 | 2451 | 9.53266213971 |
| NM_014856 | DENND4B | 4218 | 4314 | 10.5326621397 |
| NM_014856 | DENND4B | 3839 | 3902 | 9.44852293033 |
| NM_014856 | DENND4B | 3751 | 3828 | 11.1174508901 |
| NM_014856 | DENND4B | 2841 | 2940 | 11.5326621397 |
| NM_002357 | MXD1    | 1146 | 1216 | 5.43947713885 |
| NM_022045 | MTBP    | 2039 | 2081 | 11.335205083  |
| NM_022044 | SDF2L1  | 488  | 560  | 10.5392132033 |
| NM_022044 | SDF2L1  | 381  | 470  | 8.95425070256 |
| NM_022044 | SDF2L1  | 167  | 221  | 9.95425070256 |
| NM_022044 | SDF2L1  | 562  | 612  | 9.9542439715  |
| NM_022044 | SDF2L1  | 112  | 164  | 9.53921296736 |
| NM_022044 | SDF2L1  | 702  | 769  | 9.53921320328 |
| NM_022044 | SDF2L1  | 254  | 297  | 7.87011149317 |
| NM_022044 | SDF2L1  | 782  | 867  | 9.53921320328 |
| NM_183323 | PAIP1   | 768  | 889  | 5.72669251408 |
| NM_183323 | PAIP1   | 688  | 758  | 5.46365810824 |
| NM_183323 | PAIP1   | 173  | 233  | 5.46365810824 |
| NM_183323 | PAIP1   | 1473 | 1521 | 4.72267491391 |
| NM_183323 | PAIP1   | 902  | 968  | 4.72669250653 |
| NM_183323 | PAIP1   | 1341 | 1410 | 4.1417232823  |
| NM_183323 | PAIP1   | 123  | 173  | 3.13771241318 |
| NM_183323 | PAIP1   | 1088 | 1170 | 3.14173001336 |
| NM_183323 | PAIP1   | 536  | 686  | 6.46365810824 |
| NM_183323 | PAIP1   | 289  | 507  | 6.72669251408 |
| NM_021244 | RRAGD   | 1085 | 1156 | 12.3318165779 |
| NM_021244 | RRAGD   | 366  | 415  | 10.742843208  |
| NM_021244 | RRAGD   | 5    | 28   | 10.6627215988 |
| NM_021244 | RRAGD   | 2108 | 2169 | 11.7468540772 |
| NM_021241 | WIZ     | 1163 | 1220 | 10.013239018  |
| NM_021241 | WIZ     | 2619 | 2690 | 10.0973782273 |
| NM_021241 | WIZ     | 1807 | 1896 | 9.51241572663 |
| NM_021241 | WIZ     | 3346 | 3493 | 10.8343438215 |
| NM_021241 | WIZ     | 1091 | 1156 | 8.51241572663 |
| NM_003731 | SSNA1   | 380  | 443  | 6.91601658416 |
| NM_003731 | SSNA1   | 256  | 364  | 6.5009793208  |
| NM_012100 | DNPEP   | 934  | 996  | 7.51663014937 |
| NM_012100 | DNPEP   | 1072 | 1129 | 5.5126125492  |
| NM_012100 | DNPEP   | 1390 | 1432 | 6.43249093999 |
| NM_012100 | DNPEP   | 695  | 717  | 5.5126125492  |
| NM_012100 | DNPEP   | 513  | 635  | 6.51663014937 |

|           |         |      |      |                |
|-----------|---------|------|------|----------------|
| NM_199290 | NACA2   | 284  | 340  | 0.586474752881 |
| NM_199290 | NACA2   | 686  | 747  | 2.5864749888   |
| NM_199290 | NACA2   | 518  | 563  | 0.5864749888   |
| NM_199290 | NACA2   | 192  | 252  | 0.5864749888   |
| NM_199290 | NACA2   | 567  | 669  | 1.5864749888   |
| NM_199297 | THYN1   | 651  | 723  | 4.5823968853   |
| NM_012104 | BACE1   | 2211 | 2293 | 8.81484764567  |
| NM_012104 | BACE1   | 1761 | 1804 | 8.22988514495  |
| NM_012104 | BACE1   | 1007 | 1066 | 8.225867545    |
| NM_012104 | BACE1   | 2944 | 3005 | 7.225867545    |
| NM_012104 | BACE1   | 2827 | 2890 | 8.225867545    |
| NM_012459 | TIMM8B  | 232  | 313  | 5.87265018154  |
| NM_012106 | ARL2BP  | 1328 | 1398 | 5.85678576817  |
| NM_012106 | ARL2BP  | 264  | 351  | 6.5939251051   |
| NM_012106 | ARL2BP  | 565  | 702  | 7.27199701776  |
| NM_012456 | TIMM10  | 352  | 414  | 4.58413452711  |
| NM_012455 | PSD4    | 3638 | 3733 | 8.51152698247  |
| NM_012455 | PSD4    | 4964 | 4992 | 9.01252402413  |
| NM_012455 | PSD4    | 3479 | 3548 | 8.51169400174  |
| NM_012453 | TBL2    | 521  | 608  | 7.95268690654  |
| NM_012453 | TBL2    | 308  | 398  | 6.95251315622  |
| NM_012453 | TBL2    | 737  | 795  | 8.53764940726  |
| NM_012453 | TBL2    | 274  | 306  | 5.94866930637  |
| NM_012453 | TBL2    | 1586 | 1690 | 9.53764940726  |
| NM_012453 | TBL2    | 849  | 903  | 7.94866930637  |
| NM_012453 | TBL2    | 2872 | 2927 | 5.94866930637  |
| NM_012453 | TBL2    | 1983 | 2072 | 6.95268017549  |
| NM_012453 | TBL2    | 1204 | 1281 | 5.86854769716  |
| NM_012453 | TBL2    | 2185 | 2291 | 7.53764940704  |
| NM_012453 | TBL2    | 410  | 518  | 8.53764940726  |
| NM_012453 | TBL2    | 960  | 1088 | 7.53764940726  |
| NM_006247 | PPP5C   | 1580 | 1622 | 5.17871158156  |
| NM_006247 | PPP5C   | 1072 | 1120 | 7.17871158178  |
| NM_006247 | PPP5C   | 1143 | 1255 | 6.76366735145  |
| NM_006247 | PPP5C   | 620  | 654  | 5.17469398161  |
| NM_006247 | PPP5C   | 574  | 616  | 5.0945723724   |
| NM_006247 | PPP5C   | 372  | 465  | 5.17871158156  |
| NM_006247 | PPP5C   | 1786 | 1850 | 6.17469398161  |
| NM_006247 | PPP5C   | 655  | 727  | 5.17853783146  |
| NM_006247 | PPP5C   | 104  | 276  | 6.7636740825   |
| NM_006247 | PPP5C   | 894  | 1062 | 8.50063967667  |
| NM_006246 | PPP2R5E | 2238 | 2288 | 6.35032354654  |
| NM_006246 | PPP2R5E | 4006 | 4084 | 5.35033027737  |
| NM_006246 | PPP2R5E | 536  | 586  | 5.35033027005  |
| NM_006246 | PPP2R5E | 2100 | 2168 | 5.35015652728  |
| NM_006246 | PPP2R5E | 3045 | 3093 | 6.935119028    |
| NM_006246 | PPP2R5E | 1187 | 1267 | 5.35033004168  |
| NM_006246 | PPP2R5E | 939  | 1017 | 5.35032354654  |
| NM_006246 | PPP2R5E | 1718 | 1760 | 6.935119028    |
| NM_006246 | PPP2R5E | 2419 | 2490 | 6.35033004168  |



|           |          |      |      |               |               |
|-----------|----------|------|------|---------------|---------------|
| NM_003365 | UQCRC1   | 444  | 489  | 4.1756726302  |               |
| NM_003365 | UQCRC1   | 232  | 393  | 5.48220426092 |               |
| NM_003365 | UQCRC1   | 491  | 550  | 4.25981183958 |               |
| NM_003365 | UQCRC1   | 758  | 852  | 4.25981183958 |               |
| NM_003365 | UQCRC1   | 1080 | 1183 | 4.67484933886 |               |
| NM_003365 | UQCRC1   | 1252 | 1399 | 5.8447743403  |               |
| NM_003365 | UQCRC1   | 1445 | 1501 | 3.67484260781 |               |
| NM_003365 | UQCRC1   | 638  | 708  | 2.67484910294 |               |
| NM_174908 | CCDC50   | 683  | 743  | 2.86616300305 |               |
| NM_174908 | CCDC50   | 813  | 907  | 3.28120050988 |               |
| NM_174908 | CCDC50   | 1195 | 1237 | 2.86598926029 |               |
| NM_174908 | CCDC50   | 1496 | 1554 | 2.28120050966 |               |
| NM_174908 | CCDC50   | 636  | 678  | 2.27718290971 |               |
| NM_174908 | CCDC50   | 978  | 1058 | 3.28119377883 |               |
| NM_174908 | CCDC50   | 1751 | 1857 | 2.86616301038 |               |
| NM_174908 | CCDC50   | 1569 | 1655 | 2.8661630106  |               |
| NM_174909 | TMEM167A |      | 429  | 519           | 5.89916010204 |
| NM_174909 | TMEM167A |      | 965  | 1040          | 5.31419760132 |
| NM_174909 | TMEM167A |      | 1634 | 1710          | 5.31419087027 |
| NM_174909 | TMEM167A |      | 3027 | 3063          | 5.31018000115 |
| NM_174909 | TMEM167A |      | 900  | 944           | 4.23005839194 |
| NM_174909 | TMEM167A |      | 3624 | 3709          | 4.31419760132 |
| NM_174909 | TMEM167A |      | 142  | 294           | 7.89916010204 |
| NM_174909 | TMEM167A |      | 306  | 412           | 7.31419760132 |
| NM_006796 | AFG3L2   | 1865 | 1925 | 3.71770274569 |               |
| NM_006796 | AFG3L2   | 1649 | 1702 | 5.30283899673 |               |
| NM_006796 | AFG3L2   | 1297 | 1390 | 7.0398045909  |               |
| NM_006796 | AFG3L2   | 830  | 884  | 6.30283899673 |               |
| NM_006796 | AFG3L2   | 2443 | 2522 | 5.30283899651 |               |
| NM_006796 | AFG3L2   | 612  | 661  | 6.30283899673 |               |
| NM_006796 | AFG3L2   | 293  | 362  | 5.30283899673 |               |
| NM_006796 | AFG3L2   | 1138 | 1221 | 4.71787649601 |               |
| NM_006796 | AFG3L2   | 2052 | 2187 | 6.71787649601 |               |
| NM_006796 | AFG3L2   | 886  | 969  | 5.30283899673 |               |
| NM_006796 | AFG3L2   | 2881 | 3027 | 5.71787649601 |               |
| NM_006796 | AFG3L2   | 366  | 460  | 6.0398045909  |               |
| NM_006796 | AFG3L2   | 1041 | 1136 | 5.30283899673 |               |
| NM_006796 | AFG3L2   | 2273 | 2438 | 5.71787649601 |               |
| NM_006796 | AFG3L2   | 1740 | 1865 | 5.71787649601 |               |
| NM_178031 | TMEM132A |      | 2231 | 2311          | 9.77820432959 |
| NM_178031 | TMEM132A |      | 3182 | 3237          | 10.3631668301 |
| NM_178031 | TMEM132A |      | 1502 | 1531          | 8.69406512021 |
| NM_178031 | TMEM132A |      | 2761 | 2842          | 11.1001324245 |
| NM_178031 | TMEM132A |      | 290  | 376           | 9.77820432959 |
| NM_178031 | TMEM132A |      | 390  | 482           | 11.1001324243 |
| NM_178031 | TMEM132A |      | 916  | 1009          | 10.7782043296 |
| NM_178031 | TMEM132A |      | 1944 | 2114          | 11.948129331  |
| NM_178031 | TMEM132A |      | 1203 | 1273          | 9.77819759854 |
| NM_182547 | TMED4    | 323  | 412  | 8.4120072367  |               |
| NM_182547 | TMED4    | 236  | 292  | 6.67504164253 |               |

|              |        |      |      |               |
|--------------|--------|------|------|---------------|
| NM_182547    | TMED4  | 845  | 1023 | 8.4120072367  |
| NM_182547    | TMED4  | 419  | 829  | 9.99696973742 |
| NM_182547    | TMED4  | 72   | 220  | 7.09007914181 |
| NM_001005619 | ITGB4  | 2293 | 2343 | 11.011853657  |
| NM_001005619 | ITGB4  | 2973 | 3010 | 10.927888198  |
| NM_001005619 | ITGB4  | 2854 | 2899 | 10.0120271714 |
| NM_001005619 | ITGB4  | 4247 | 4312 | 12.0120271714 |
| NM_001005619 | ITGB4  | 632  | 685  | 10.0120206763 |
| NM_001005619 | ITGB4  | 2161 | 2238 | 11.5929723079 |
| NM_001005619 | ITGB4  | 1048 | 1162 | 10.0120271714 |
| NM_001005619 | ITGB4  | 1919 | 2009 | 10.0120274074 |
| NM_001005619 | ITGB4  | 1341 | 1407 | 11.0120274074 |
| NM_006793    | PRDX3  | 419  | 457  | 4.11946115525 |
| NM_006793    | PRDX3  | 69   | 121  | 4.11928740515 |
| NM_006793    | PRDX3  | 160  | 215  | 5.11946115547 |
| NM_006793    | PRDX3  | 1510 | 1561 | 3.11945442442 |
| NM_006793    | PRDX3  | 514  | 641  | 7.11946115547 |
| NM_006793    | PRDX3  | 1278 | 1400 | 6.11946115547 |
| NM_006793    | PRDX3  | 900  | 1031 | 7.11946115547 |
| NM_006793    | PRDX3  | 721  | 845  | 5.11946115547 |
| NM_006793    | PRDX3  | 298  | 418  | 6.11946115547 |
| NM_006793    | PRDX3  | 1041 | 1268 | 7.11946115547 |
| NM_001979    | EPHX2  | 1673 | 1784 | 7.48170569127 |
| NM_004090    | DUSP3  | 1929 | 1996 | 5.4672481434  |
| NM_004090    | DUSP3  | 3953 | 4011 | 5.46724790748 |
| NM_004090    | DUSP3  | 3861 | 3922 | 6.46724790748 |
| NM_004090    | DUSP3  | 695  | 750  | 5.46724141235 |
| NM_004090    | DUSP3  | 369  | 453  | 7.78917623829 |
| NM_004090    | DUSP3  | 1320 | 1386 | 7.05221063657 |
| NM_004090    | DUSP3  | 94   | 143  | 6.46323054323 |
| NM_004090    | DUSP3  | 1766 | 1839 | 5.46724813585 |
| NM_004090    | DUSP3  | 3063 | 3139 | 6.46724141235 |
| NM_004090    | DUSP3  | 3757 | 3850 | 7.78917623829 |
| NM_004090    | DUSP3  | 188  | 346  | 7.4672481434  |
| NM_004090    | DUSP3  | 819  | 964  | 7.05221063657 |
| NM_004090    | DUSP3  | 3317 | 3391 | 7.46724814318 |
| NM_004091    | E2F2   | 4094 | 4189 | 9.8742908284  |
| NM_004092    | ECHS1  | 1115 | 1171 | 7.0046003008  |
| NM_004092    | ECHS1  | 365  | 419  | 7.32652840323 |
| NM_004092    | ECHS1  | 604  | 649  | 6.50542359968 |
| NM_004092    | ECHS1  | 1243 | 1285 | 6.00058270817 |
| NM_004092    | ECHS1  | 698  | 734  | 6.00058270817 |
| NM_004092    | ECHS1  | 147  | 332  | 7.32652840323 |
| NM_004092    | ECHS1  | 771  | 860  | 5.0046003008  |
| NM_004094    | EIF2S1 | 1219 | 1315 | 2.76020656436 |
| NM_004094    | EIF2S1 | 170  | 245  | 4.34516906508 |
| NM_004094    | EIF2S1 | 1342 | 1391 | 5.08213465925 |
| NM_004094    | EIF2S1 | 65   | 114  | 4.76020680028 |
| NM_004094    | EIF2S1 | 634  | 691  | 4.34516929345 |
| NM_004094    | EIF2S1 | 365  | 420  | 2.67606759089 |

|           |          |      |      |               |               |
|-----------|----------|------|------|---------------|---------------|
| NM_004094 | EIF2S1   | 300  | 335  | 3.76003304996 |               |
| NM_004094 | EIF2S1   | 1109 | 1163 | 2.7561892001  |               |
| NM_004094 | EIF2S1   | 936  | 1006 | 4.34499555068 |               |
| NM_004094 | EIF2S1   | 471  | 634  | 5.345169301   |               |
| NM_004096 | EIF4EBP2 |      | 1846 | 1891          | 3.22540857641 |
| NM_004096 | EIF4EBP2 |      | 1766 | 1823          | 1.64044608324 |
| NM_004096 | EIF4EBP2 |      | 1133 | 1179          | 3.63642848307 |
| NM_004096 | EIF4EBP2 |      | 1239 | 1281          | 2.63642848307 |
| NM_004096 | EIF4EBP2 |      | 5383 | 5425          | 1.55630687386 |
| NM_004096 | EIF4EBP2 |      | 6219 | 6309          | 2.64044608324 |
| NM_004096 | EIF4EBP2 |      | 884  | 925           | 1.63642848307 |
| NM_004096 | EIF4EBP2 |      | 2437 | 2482          | 2.64044607569 |
| NM_004096 | EIF4EBP2 |      | 6014 | 6082          | 4.64044608324 |
| NM_004096 | EIF4EBP2 |      | 1024 | 1073          | 2.64027233292 |
| NM_004096 | EIF4EBP2 |      | 6601 | 6641          | 1.63642848307 |
| NM_004096 | EIF4EBP2 |      | 1300 | 1363          | 1.64044607569 |
| NM_004096 | EIF4EBP2 |      | 6169 | 6217          | 1.64043935219 |
| NM_004096 | EIF4EBP2 |      | 1681 | 1726          | 2.63642848307 |
| NM_004096 | EIF4EBP2 |      | 2525 | 2597          | 2.63642848307 |
| NM_004096 | EIF4EBP2 |      | 811  | 874           | 3.64044608324 |
| NM_004096 | EIF4EBP2 |      | 552  | 682           | 3.96237417813 |
| NM_004096 | EIF4EBP2 |      | 6743 | 6810          | 3.63642848307 |
| NM_004096 | EIF4EBP2 |      | 1366 | 1487          | 3.22540857641 |
| NM_004096 | EIF4EBP2 |      | 2288 | 2359          | 2.64044608302 |
| NM_004096 | EIF4EBP2 |      | 3866 | 3959          | 3.22540858374 |
| NM_004096 | EIF4EBP2 |      | 2121 | 2288          | 3.64044608324 |
| NM_004096 | EIF4EBP2 |      | 369  | 525           | 3.96237417813 |
| NM_004096 | EIF4EBP2 |      | 695  | 745           | 3.22139098379 |
| NM_004096 | EIF4EBP2 |      | 37   | 86            | 1.63642848307 |
| NM_004099 | STOM     | 126  | 180  | 3.71416036907 |               |
| NM_004099 | STOM     | 1941 | 2010 | 5.29912960084 |               |
| NM_004099 | STOM     | 2186 | 2251 | 5.71416710011 |               |
| NM_004099 | STOM     | 2394 | 2491 | 5.29912960062 |               |
| NM_004099 | STOM     | 2031 | 2055 | 3.63002789074 |               |
| NM_004099 | STOM     | 2533 | 2580 | 4.71416709257 |               |
| NM_004099 | STOM     | 2624 | 2666 | 5.29895585052 |               |
| NM_004099 | STOM     | 1053 | 1100 | 5.29912959329 |               |
| NM_004099 | STOM     | 55   | 113  | 4.71416709257 |               |
| NM_004099 | STOM     | 780  | 971  | 7.71416710012 |               |
| NM_004099 | STOM     | 185  | 291  | 7.17359871876 |               |
| NM_004099 | STOM     | 2793 | 2884 | 4.7141670999  |               |
| NM_004099 | STOM     | 974  | 1044 | 4.7141670999  |               |
| NM_004099 | STOM     | 1761 | 1885 | 6.29912960084 |               |
| NM_004099 | STOM     | 310  | 755  | 9.44208755468 |               |
| NM_004099 | STOM     | 1169 | 1369 | 7.29912960084 |               |
| NM_004099 | STOM     | 1455 | 1539 | 4.71416710012 |               |
| NM_004099 | STOM     | 2915 | 3037 | 6.03609519501 |               |
| NM_004728 | DDX21    | 2315 | 2404 | 1.89080051585 |               |
| NM_004728 | DDX21    | 179  | 236  | 2.89080051585 |               |
| NM_004728 | DDX21    | 4432 | 4490 | 1.89080051563 |               |

|              |         |      |      |               |
|--------------|---------|------|------|---------------|
| NM_004728    | DDX21   | 3538 | 3616 | 4.21272861074 |
| NM_004728    | DDX21   | 760  | 825  | 3.47576301657 |
| NM_004728    | DDX21   | 4567 | 4622 | 2.89080051585 |
| NM_004728    | DDX21   | 2992 | 3057 | 2.89080051585 |
| NM_004728    | DDX21   | 275  | 330  | 3.47576278065 |
| NM_004728    | DDX21   | 4508 | 4552 | 4.21272861074 |
| NM_004728    | DDX21   | 3772 | 3833 | 2.89080027993 |
| NM_004728    | DDX21   | 3842 | 3879 | 3.39162380719 |
| NM_004728    | DDX21   | 3631 | 3712 | 4.47576301657 |
| NM_004728    | DDX21   | 4007 | 4114 | 3.89080051585 |
| NM_004728    | DDX21   | 556  | 610  | 2.88678291568 |
| NM_004728    | DDX21   | 2835 | 2899 | 1.89062676553 |
| NM_004728    | DDX21   | 2913 | 2963 | 2.89062676553 |
| NM_004728    | DDX21   | 2176 | 2284 | 2.89080051585 |
| NM_004728    | DDX21   | 3880 | 3993 | 5.69815543791 |
| NM_004728    | DDX21   | 2663 | 2735 | 2.89080051563 |
| NM_004728    | DDX21   | 1541 | 1581 | 3.47576278065 |
| NM_004728    | DDX21   | 2561 | 2650 | 3.47576301657 |
| NM_004728    | DDX21   | 1874 | 1950 | 3.47576301657 |
| NM_004728    | DDX21   | 1412 | 1504 | 2.89080051563 |
| NM_004728    | DDX21   | 91   | 150  | 3.89080051563 |
| NM_004728    | DDX21   | 1950 | 2103 | 5.06072551729 |
| NM_004728    | DDX21   | 1264 | 1402 | 4.89080051585 |
| NM_004728    | DDX21   | 1625 | 1763 | 3.47576301657 |
| NM_004728    | DDX21   | 961  | 1213 | 6.06072551729 |
| NM_001174156 | SAMD8   | 6329 | 6386 | 8.52284928275 |
| NM_001174156 | SAMD8   | 3753 | 3792 | 8.44272767354 |
| NM_001174156 | SAMD8   | 400  | 499  | 11.5268668829 |
| NM_001174156 | SAMD8   | 238  | 292  | 10.0276901743 |
| NM_001174156 | SAMD8   | 2562 | 2615 | 8.52284928275 |
| NM_001174156 | SAMD8   | 531  | 605  | 10.1118291477 |
| NM_001174156 | SAMD8   | 745  | 837  | 10.8487949778 |
| NM_184231    | NCKIPSD | 1346 | 1392 | 8.31886912685 |
| NM_001173463 | KIF21A  | 942  | 991  | 6.86099892771 |
| NM_001173463 | KIF21A  | 5422 | 5471 | 6.94112053692 |
| NM_001173463 | KIF21A  | 5099 | 5148 | 6.36017562882 |
| NM_001173463 | KIF21A  | 5351 | 5409 | 5.36000188605 |
| NM_001173463 | KIF21A  | 4454 | 4539 | 7.94513813709 |
| NM_001173463 | KIF21A  | 4629 | 4670 | 5.36016890532 |
| NM_001173463 | KIF21A  | 4291 | 4397 | 7.68210373104 |
| NM_001173463 | KIF21A  | 6280 | 6428 | 6.36017563637 |
| NM_001173463 | KIF21A  | 1134 | 1225 | 5.36000188605 |
| NM_001173463 | KIF21A  | 3907 | 3982 | 6.36016890532 |
| NM_001173463 | KIF21A  | 1230 | 1281 | 6.86099892771 |
| NM_001173463 | KIF21A  | 5212 | 5317 | 6.94513813709 |
| NM_001173463 | KIF21A  | 5962 | 6089 | 7.94513813709 |
| NM_133510    | RAD51B  | 99   | 162  | 10.8854569067 |
| NM_133510    | RAD51B  | 680  | 733  | 11.5545518857 |
| NM_133510    | RAD51B  | 275  | 318  | 9.88545690669 |
| NM_001173468 | PDHB    | 504  | 567  | 3.21374009204 |

|              |        |      |      |               |
|--------------|--------|------|------|---------------|
| NM_001173468 | PDHB   | 307  | 337  | 4.29386170125 |
| NM_020158    | EXOSC5 | 554  | 627  | 8.35670843635 |
| NM_020158    | EXOSC5 | 93   | 197  | 9.35671516741 |
| NM_006830    | UQCR11 | 319  | 416  | 3.43852397075 |
| NM_006830    | UQCR11 | 551  | 619  | 4.43853069425 |
| NM_006830    | UQCR11 | 423  | 530  | 4.76045879669 |
| NM_006830    | UQCR11 | 684  | 716  | 3.43451310163 |
| NM_006830    | UQCR11 | 107  | 299  | 6.60845570324 |
| NM_006831    | CLP1   | 1051 | 1085 | 8.43784741425 |
| NM_006831    | CLP1   | 1242 | 1303 | 7.35772580504 |
| NM_006831    | CLP1   | 1325 | 1422 | 8.43784741425 |
| NM_000405    | GM2A   | 264  | 375  | 9.00997798722 |
| NM_000405    | GM2A   | 448  | 542  | 9.00997798722 |
| NM_000405    | GM2A   | 583  | 632  | 7.42099788633 |
| NM_006833    | COPS6  | 608  | 657  | 3.71971490862 |
| NM_006833    | COPS6  | 550  | 603  | 5.30066654023 |
| NM_006833    | COPS6  | 366  | 418  | 5.30467740934 |
| NM_006833    | COPS6  | 982  | 1051 | 6.3046841404  |
| NM_006833    | COPS6  | 657  | 698  | 5.30468413285 |
| NM_006833    | COPS6  | 30   | 80   | 3.71954788936 |
| NM_006833    | COPS6  | 220  | 336  | 6.71972163968 |
| NM_006833    | COPS6  | 102  | 211  | 6.04164973456 |
| NM_006833    | COPS6  | 420  | 547  | 6.52707656173 |
| NM_006833    | COPS6  | 731  | 969  | 6.71972163968 |
| NM_006834    | RAB32  | 257  | 298  | 7.78462215402 |
| NM_006834    | RAB32  | 667  | 707  | 7.1996596533  |
| NM_006834    | RAB32  | 381  | 567  | 9.78479590434 |
| NM_006834    | RAB32  | 998  | 1100 | 8.19983340361 |
| NM_006834    | RAB32  | 790  | 909  | 8.52176149851 |
| NM_000402    | G6PD   | 889  | 934  | 4.63260559363 |
| NM_000402    | G6PD   | 1950 | 2011 | 6.71657105269 |
| NM_000402    | G6PD   | 983  | 1029 | 6.21756809435 |
| NM_000402    | G6PD   | 1471 | 1547 | 5.71674456709 |
| NM_000402    | G6PD   | 1755 | 1795 | 5.71272720284 |
| NM_000402    | G6PD   | 735  | 814  | 5.71674479546 |
| NM_006836    | GCN1L1 | 7195 | 7238 | 5.53655925766 |
| NM_006836    | GCN1L1 | 6220 | 6270 | 7.12169550869 |
| NM_006836    | GCN1L1 | 6809 | 6864 | 5.53673300776 |
| NM_006836    | GCN1L1 | 2402 | 2468 | 7.1216955087  |
| NM_006836    | GCN1L1 | 1708 | 1744 | 6.53655925766 |
| NM_006836    | GCN1L1 | 3623 | 3695 | 5.53673300798 |
| NM_006836    | GCN1L1 | 1369 | 1493 | 7.1216955087  |
| NM_006836    | GCN1L1 | 268  | 318  | 8.34408793004 |
| NM_006836    | GCN1L1 | 2040 | 2133 | 8.70665800942 |
| NM_006836    | GCN1L1 | 5904 | 5964 | 7.1216955087  |
| NM_006836    | GCN1L1 | 2944 | 3007 | 7.85866110287 |
| NM_006836    | GCN1L1 | 4142 | 4194 | 5.53655925766 |
| NM_006836    | GCN1L1 | 2817 | 2876 | 5.53673300798 |
| NM_006836    | GCN1L1 | 4762 | 4854 | 7.53673300798 |
| NM_006836    | GCN1L1 | 6294 | 6334 | 7.12152175838 |

|           |        |       |       |               |
|-----------|--------|-------|-------|---------------|
| NM_006836 | GCN1L1 | 3129  | 3290  | 9.23717272612 |
| NM_006836 | GCN1L1 | 7014  | 7129  | 7.1216955087  |
| NM_006836 | GCN1L1 | 1931  | 2037  | 8.53673300798 |
| NM_006836 | GCN1L1 | 1494  | 1694  | 9.78466052142 |
| NM_006836 | GCN1L1 | 1198  | 1297  | 9.1216955087  |
| NM_006836 | GCN1L1 | 322   | 383   | 7.53673300797 |
| NM_006836 | GCN1L1 | 5725  | 5872  | 8.70665800942 |
| NM_006836 | GCN1L1 | 7533  | 7605  | 7.12169550869 |
| NM_006836 | GCN1L1 | 7660  | 7846  | 8.99616462662 |
| NM_006836 | GCN1L1 | 2168  | 2272  | 7.1216955087  |
| NM_006836 | GCN1L1 | 8418  | 8604  | 9.34408793004 |
| NM_006836 | GCN1L1 | 7993  | 8048  | 6.53673300043 |
| NM_006836 | GCN1L1 | 8284  | 8379  | 6.53673300798 |
| NM_006836 | GCN1L1 | 6695  | 6799  | 7.85866110287 |
| NM_006836 | GCN1L1 | 3305  | 3554  | 9.78466052142 |
| NM_006836 | GCN1L1 | 5366  | 5420  | 5.53673277206 |
| NM_006836 | GCN1L1 | 5477  | 5667  | 8.70665800942 |
| NM_006836 | GCN1L1 | 1747  | 1921  | 8.99616462662 |
| NM_006836 | GCN1L1 | 4515  | 4732  | 8.34408793004 |
| NM_006836 | GCN1L1 | 7872  | 7984  | 8.34408793004 |
| NM_006836 | GCN1L1 | 2525  | 2773  | 9.53673300798 |
| NM_006836 | GCN1L1 | 6566  | 6659  | 6.53673300798 |
| NM_006836 | GCN1L1 | 3713  | 4024  | 9.92905043076 |
| NM_006836 | GCN1L1 | 395   | 481   | 7.85866110287 |
| NM_006836 | GCN1L1 | 5284  | 5366  | 6.53673300776 |
| NM_006836 | GCN1L1 | 6371  | 6458  | 7.1216955087  |
| NM_006836 | GCN1L1 | 639   | 1188  | 11.1805891978 |
| NM_006836 | GCN1L1 | 53    | 226   | 8.1216955087  |
| NM_006836 | GCN1L1 | 7240  | 7530  | 9.34408793004 |
| NM_006836 | GCN1L1 | 487   | 625   | 7.53673300798 |
| NM_006836 | GCN1L1 | 4881  | 5240  | 10.2916205101 |
| NM_006836 | GCN1L1 | 4209  | 4504  | 9.23717272612 |
| NM_006836 | GCN1L1 | 6883  | 7012  | 7.85866110287 |
| NM_006836 | GCN1L1 | 5973  | 6220  | 9.53673300798 |
| NM_006837 | COPS5  | 1240  | 1311  | 5.30396135718 |
| NM_006837 | COPS5  | 757   | 797   | 5.30396135718 |
| NM_006837 | COPS5  | 1414  | 1452  | 6.30396112148 |
| NM_006837 | COPS5  | 869   | 948   | 6.30396112148 |
| NM_006837 | COPS5  | 949   | 1095  | 6.88892385812 |
| NM_006837 | COPS5  | 550   | 685   | 7.47388635884 |
| NM_006837 | COPS5  | 439   | 537   | 5.3039613574  |
| NM_006838 | METAP2 | 1741  | 1802  | 3.69821992887 |
| NM_006838 | METAP2 | 851   | 1035  | 5.70223752905 |
| NM_006838 | METAP2 | 1882  | 1948  | 2.11325742815 |
| NM_006838 | METAP2 | 678   | 808   | 4.11727502832 |
| NM_006838 | METAP2 | 318   | 396   | 2.11325742815 |
| NM_006838 | METAP2 | 1385  | 1468  | 5.11727502832 |
| NM_001973 | ELK4   | 10960 | 11008 | 6.43933827489 |
| NM_001973 | ELK4   | 1249  | 1295  | 7.43532091063 |
| NM_001973 | ELK4   | 7598  | 7722  | 8.02430101153 |

|           |         |       |       |               |
|-----------|---------|-------|-------|---------------|
| NM_001973 | ELK4    | 6969  | 7034  | 6.35519930142 |
| NM_001973 | ELK4    | 1345  | 1399  | 7.43532091063 |
| NM_001973 | ELK4    | 1628  | 1732  | 8.0243010113  |
| NM_001973 | ELK4    | 2804  | 2920  | 8.4393385108  |
| NM_001973 | ELK4    | 10638 | 10733 | 7.4393385108  |
| NM_001973 | ELK4    | 4634  | 4732  | 8.02429428047 |
| NM_004454 | ETV5    | 331   | 375   | 6.77089451437 |
| NM_004892 | SEC22B  | 1727  | 1786  | 4.41031803364 |
| NM_004892 | SEC22B  | 1122  | 1177  | 5.99528052682 |
| NM_004892 | SEC22B  | 346   | 446   | 6.73224612854 |
| NM_004892 | SEC22B  | 455   | 567   | 7.21767295571 |
| NM_004892 | SEC22B  | 643   | 712   | 6.41031803364 |
| NM_004892 | SEC22B  | 28    | 154   | 6.73224612854 |
| NM_004892 | SEC22B  | 743   | 929   | 7.58024303509 |
| NM_014283 | C1orf9  | 1611  | 1653  | 7.24393668967 |
| NM_014283 | C1orf9  | 174   | 235   | 7.23992582055 |
| NM_014283 | C1orf9  | 3897  | 4000  | 7.24394342072 |
| NM_014283 | C1orf9  | 3365  | 3442  | 9.24394342073 |
| NM_014283 | C1orf9  | 5548  | 5651  | 6.65898092    |
| NM_014283 | C1orf9  | 3298  | 3338  | 6.65496331983 |
| NM_014283 | C1orf9  | 334   | 423   | 8.46633584206 |
| NM_014283 | C1orf9  | 3541  | 3628  | 5.65898092    |
| NM_014283 | C1orf9  | 1674  | 1773  | 8.65898092    |
| NM_014283 | C1orf9  | 1484  | 1576  | 5.65898092    |
| NM_014283 | C1orf9  | 2848  | 2909  | 6.65880716969 |
| NM_014283 | C1orf9  | 2697  | 2783  | 6.65898068409 |
| NM_014283 | C1orf9  | 1860  | 1995  | 7.98090901489 |
| NM_014283 | C1orf9  | 4552  | 4601  | 6.65496331983 |
| NM_014283 | C1orf9  | 2316  | 2419  | 6.65898092    |
| NM_014283 | C1orf9  | 444   | 531   | 7.24393668967 |
| NM_014283 | C1orf9  | 2947  | 3039  | 6.65898092    |
| NM_014283 | C1orf9  | 4625  | 4754  | 7.24394342073 |
| NM_014283 | C1orf9  | 656   | 708   | 7.24393668967 |
| NM_014283 | C1orf9  | 5144  | 5244  | 6.65898092    |
| NM_014283 | C1orf9  | 749   | 887   | 7.98090901489 |
| NM_014283 | C1orf9  | 3660  | 3714  | 7.23992582055 |
| NM_014283 | C1orf9  | 2540  | 2675  | 8.46633584206 |
| NM_004894 | C14orf2 | 283   | 377   | 7.87197775318 |
| NM_004894 | C14orf2 | 36    | 99    | 7.02398084662 |
| NM_004894 | C14orf2 | 395   | 438   | 6.28701525246 |
| NM_004894 | C14orf2 | 441   | 517   | 5.70187900142 |
| NM_004894 | C14orf2 | 151   | 244   | 6.28701525246 |
| NM_004896 | VPS26A  | 382   | 478   | 5.3649873997  |
| NM_004896 | VPS26A  | 2073  | 2122  | 4.04305257376 |
| NM_004896 | VPS26A  | 944   | 984   | 2.95892009543 |
| NM_004896 | VPS26A  | 511   | 570   | 4.04305930482 |
| NM_004896 | VPS26A  | 1838  | 1901  | 4.0428855545  |
| NM_004896 | VPS26A  | 1311  | 1378  | 3.95892009543 |
| NM_004896 | VPS26A  | 617   | 731   | 5.62802180554 |
| NM_004896 | VPS26A  | 184   | 263   | 3.04305929727 |

|           |         |      |      |               |
|-----------|---------|------|------|---------------|
| NM_004896 | VPS26A  | 1015 | 1094 | 3.0430590689  |
| NM_001975 | EN02    | 485  | 537  | 5.49496022175 |
| NM_001975 | EN02    | 2110 | 2149 | 4.4911163719  |
| NM_001975 | EN02    | 701  | 735  | 5.99595726341 |
| NM_001975 | EN02    | 1602 | 1719 | 6.81706206696 |
| NM_001975 | EN02    | 1732 | 1786 | 5.41099476269 |
| NM_001975 | EN02    | 1499 | 1598 | 7.08009647279 |
| NM_001975 | EN02    | 1884 | 1950 | 4.49496022175 |
| NM_020117 | LARS    | 3803 | 3873 | 6.23428532496 |
| NM_020117 | LARS    | 2930 | 3006 | 5.4973197308  |
| NM_020117 | LARS    | 1664 | 1766 | 4.91235723008 |
| NM_020117 | LARS    | 707  | 767  | 4.91218347976 |
| NM_020117 | LARS    | 2731 | 2796 | 4.91235049902 |
| NM_020117 | LARS    | 1798 | 1858 | 5.49731972325 |
| NM_020117 | LARS    | 2066 | 2160 | 4.91235723008 |
| NM_020117 | LARS    | 1868 | 1952 | 4.91235723008 |
| NM_020117 | LARS    | 2294 | 2426 | 6.23428532496 |
| NM_020117 | LARS    | 1094 | 1165 | 5.91235699416 |
| NM_020117 | LARS    | 3091 | 3139 | 3.82821802069 |
| NM_020117 | LARS    | 3194 | 3304 | 5.4973197308  |
| NM_004547 | NDUFB4  | 74   | 167  | 9.66470010902 |
| NM_004547 | NDUFB4  | 428  | 509  | 8.49477510758 |
| NM_004547 | NDUFB4  | 231  | 426  | 9.66470010902 |
| NM_004544 | NDUFA10 | 775  | 820  | 2.04880418776 |
| NM_004544 | NDUFA10 | 1033 | 1087 | 3.63377318362 |
| NM_004544 | NDUFA10 | 877  | 980  | 3.04881091881 |
| NM_004544 | NDUFA10 | 3143 | 3182 | 2.04479331864 |
| NM_004544 | NDUFA10 | 210  | 335  | 3.63377341954 |
| NM_004544 | NDUFA10 | 1351 | 1381 | 2.04479331864 |
| NM_004544 | NDUFA10 | 418  | 501  | 3.62975581936 |
| NM_004544 | NDUFA10 | 1137 | 1245 | 3.0488106829  |
| NM_004866 | SCAMP1  | 1812 | 1867 | 5.89544465594 |
| NM_004866 | SCAMP1  | 698  | 756  | 7.8994620202  |
| NM_004866 | SCAMP1  | 1202 | 1254 | 6.89945552506 |
| NM_004866 | SCAMP1  | 795  | 919  | 7.89946225611 |
| NM_004542 | NDUFA3  | 41   | 121  | 8.44543062522 |
| NM_004541 | NDUFA1  | 117  | 372  | 7.92163198718 |
| NM_004861 | GAL3ST1 | 525  | 580  | 10.6713672489 |
| NM_004861 | GAL3ST1 | 941  | 1042 | 10.6753848491 |
| NM_004861 | GAL3ST1 | 1084 | 1152 | 9.09042234812 |
| NM_004861 | GAL3ST1 | 585  | 630  | 9.09024859803 |
| NM_004861 | GAL3ST1 | 830  | 907  | 9.0904223408  |
| NM_004548 | NDUFB10 | 426  | 499  | 4.79849107089 |
| NM_004548 | NDUFB10 | 357  | 413  | 3.20951097    |
| NM_004548 | NDUFB10 | 170  | 239  | 4.12938936079 |
| NM_004549 | NDUFC2  | 403  | 453  | 7.23089015743 |
| NM_004549 | NDUFC2  | 454  | 508  | 6.81585265815 |
| NM_004549 | NDUFC2  | 825  | 946  | 9.31835299868 |
| NM_004549 | NDUFC2  | 1484 | 1561 | 6.81183505798 |
| NM_004549 | NDUFC2  | 550  | 651  | 8.03824507949 |



|           |          |      |      |               |               |
|-----------|----------|------|------|---------------|---------------|
| NM_004549 | NDUFC2   | 655  | 802  | 9.23089015743 |               |
| NM_198475 | FAM171A2 |      | 330  | 366           | 10.9706592292 |
| NM_198475 | FAM171A2 |      | 494  | 545           | 11.9706592292 |
| NM_198475 | FAM171A2 |      | 766  | 842           | 12.6397542083 |
| NM_198475 | FAM171A2 |      | 984  | 1098          | 12.0547984386 |
| NM_198476 | C19orf54 |      | 1381 | 1432          | 10.2521352804 |
| NM_198476 | C19orf54 |      | 83   | 118           | 8.66717277966 |
| NM_198476 | C19orf54 |      | 417  | 460           | 8.74729438887 |
| NM_198476 | C19orf54 |      | 1440 | 1512          | 8.75130525799 |
| NM_005955 | MTF1     | 736  | 790  | 10.6186827897 |               |
| NM_015368 | PANX1    | 406  | 454  | 7.96309187342 |               |
| NM_015368 | PANX1    | 455  | 501  | 7.9590810043  |               |
| NM_015368 | PANX1    | 1663 | 1723 | 8.54404350502 |               |
| NM_015368 | PANX1    | 711  | 764  | 6.96309859693 |               |
| NM_015368 | PANX1    | 872  | 942  | 8.96309836856 |               |
| NM_002431 | MNAT1    | 159  | 204  | 4.79877237907 |               |
| NM_020376 | PNPLA2   | 650  | 755  | 9.42953515652 |               |
| NM_020376 | PNPLA2   | 584  | 639  | 8.42953515652 |               |
| NM_020376 | PNPLA2   | 1118 | 1199 | 8.84457265579 |               |
| NM_020376 | PNPLA2   | 927  | 976  | 7.84055505562 |               |
| NM_020376 | PNPLA2   | 868  | 916  | 7.84439890548 |               |
| NM_020376 | PNPLA2   | 216  | 259  | 8.84457265579 |               |
| NM_020376 | PNPLA2   | 1515 | 1604 | 8.42953515629 |               |
| NM_020376 | PNPLA2   | 1211 | 1270 | 8.42953515651 |               |
| NM_020376 | PNPLA2   | 1941 | 2039 | 8.84457265579 |               |
| NM_020376 | PNPLA2   | 1379 | 1476 | 6.84457264825 |               |
| NM_020375 | C12orf5  | 429  | 512  | 7.27407821803 |               |
| NM_020374 | C12orf4  | 1744 | 1821 | 8.21086118795 |               |
| NM_016094 | COMMD2   | 1167 | 1202 | 4.90915507507 |               |
| NM_016094 | COMMD2   | 429  | 486  | 6.90898805581 |               |
| NM_016094 | COMMD2   | 1300 | 1400 | 7.23108990101 |               |
| NM_016094 | COMMD2   | 246  | 359  | 5.90916180591 |               |
| NM_016094 | COMMD2   | 986  | 1091 | 4.90916180613 |               |
| NM_016094 | COMMD2   | 92   | 177  | 5.90916157021 |               |
| NM_006768 | BRAP     | 238  | 257  | 5.3380352852  |               |
| NM_006769 | LM04     | 498  | 558  | 8.21640190825 |               |
| NM_006769 | LM04     | 1103 | 1177 | 8.21640167988 |               |
| NM_198402 | PTPLB    | 1052 | 1088 | 9.50809922377 |               |
| NM_198402 | PTPLB    | 388  | 457  | 10.0930684555 |               |
| NM_198402 | PTPLB    | 1088 | 1175 | 10.8300340497 |               |
| NM_198402 | PTPLB    | 185  | 264  | 10.5081059548 |               |
| NM_198402 | PTPLB    | 542  | 919  | 13.8656579594 |               |
| NM_198402 | PTPLB    | 266  | 383  | 12.6780309563 |               |
| NM_198402 | PTPLB    | 458  | 538  | 10.0930684555 |               |
| NM_002881 | RALB     | 1468 | 1556 | 5.1869019744  |               |
| NM_002881 | RALB     | 2161 | 2208 | 4.59792187372 |               |
| NM_002881 | RALB     | 288  | 339  | 3.60193947368 |               |
| NM_182965 | SPHK1    | 1089 | 1139 | 6.21539833972 |               |
| NM_182965 | SPHK1    | 1607 | 1667 | 6.80036084799 |               |
| NM_182965 | SPHK1    | 1819 | 1864 | 6.21539834704 |               |

|              |          |      |      |                |               |
|--------------|----------|------|------|----------------|---------------|
| NM_182965    | SPHK1    | 1709 | 1798 | 7.21539834727  |               |
| NM_182965    | SPHK1    | 1143 | 1421 | 9.30286118852  |               |
| NM_182965    | SPHK1    | 873  | 1060 | 8.91583806541  |               |
| NM_182965    | SPHK1    | 1485 | 1600 | 7.53732644215  |               |
| NM_006761    | YWHAE    | 1082 | 1222 | 3.33891345244  |               |
| NM_006761    | YWHAE    | 1502 | 1804 | 4.28644603255  |               |
| NM_006761    | YWHAE    | 1404 | 1501 | 0.531558530384 |               |
| NM_006761    | YWHAE    | 54   | 495  | 4.38953952551  |               |
| NM_006761    | YWHAE    | 518  | 1076 | 5.53155853038  |               |
| NM_052886    | MAL2     | 468  | 564  | 7.77193905442  |               |
| NM_052886    | MAL2     | 1800 | 1842 | 7.03497346026  |               |
| NM_052886    | MAL2     | 2097 | 2170 | 7.03497346003  |               |
| NM_052886    | MAL2     | 1595 | 1656 | 8.03497346026  |               |
| NM_052886    | MAL2     | 729  | 813  | 8.25736588159  |               |
| NM_052886    | MAL2     | 2190 | 2331 | 7.77193905442  |               |
| NM_052886    | MAL2     | 1099 | 1149 | 7.45001095953  |               |
| NM_052886    | MAL2     | 1692 | 1760 | 8.03497346026  |               |
| NM_052886    | MAL2     | 2340 | 2386 | 6.44983720922  |               |
| NM_052886    | MAL2     | 2431 | 2497 | 7.45000422848  |               |
| NM_052886    | MAL2     | 1939 | 2025 | 7.03497346003  |               |
| NM_052886    | MAL2     | 1309 | 1358 | 6.45000422848  |               |
| NM_052886    | MAL2     | 2031 | 2093 | 7.45000422848  |               |
| NM_052886    | MAL2     | 162  | 453  | 10.9735729156  |               |
| NM_052886    | MAL2     | 2662 | 2763 | 8.25736588159  |               |
| NM_052886    | MAL2     | 586  | 707  | 8.61993596098  |               |
| NM_052886    | MAL2     | 1401 | 1466 | 5.45001072362  |               |
| NM_006766    | KAT6A    | 2607 | 2643 | 5.65594710074  |               |
| NM_006766    | KAT6A    | 1568 | 1612 | 5.57198164167  |               |
| NM_006766    | KAT6A    | 3654 | 3720 | 7.24107662072  |               |
| NM_006766    | KAT6A    | 5732 | 5789 | 5.65210325088  |               |
| NM_006766    | KAT6A    | 783  | 809  | 5.57198164167  |               |
| NM_006766    | KAT6A    | 7380 | 7447 | 5.65612085083  |               |
| NM_006766    | KAT6A    | 2229 | 2307 | 7.6561208435   |               |
| NM_182962    | BIRC3    | 1948 | 1988 | 9.08653415721  |               |
| NM_182962    | BIRC3    | 286  | 347  | 10.7556358673  |               |
| NM_182962    | BIRC3    | 424  | 463  | 10.1704996163  |               |
| NM_182962    | BIRC3    | 622  | 694  | 11.1706733666  |               |
| NM_182962    | BIRC3    | 359  | 420  | 10.7556358671  |               |
| NM_007371    | BRD3     | 2545 | 2595 | 6.04228166171  |               |
| NM_007371    | BRD3     | 5237 | 5299 | 4.54128462005  |               |
| NM_001003703 | ATP5J    | 964  | 1011 | 4.91517796013  |               |
| NM_001003703 | ATP5J    | 821  | 903  | 6.33038920973  |               |
| NM_001003703 | ATP5J    | 904  | 952  | 4.91535171045  |               |
| NM_001003703 | ATP5J    | 762  | 811  | 4.33021545941  |               |
| NM_001003703 | ATP5J    | 1058 | 1147 | 4.9153517029   |               |
| NM_001003702 | ARHGEF35 |      | 901  | 965            | 12.0214509455 |
| NM_001003702 | ARHGEF35 |      | 1067 | 1142           | 10.937311972  |
| NM_001003702 | ARHGEF35 |      | 446  | 500            | 11.0214509455 |
| NM_001003702 | ARHGEF35 |      | 1428 | 1518           | 12.0214511814 |
| NM_001003702 | ARHGEF35 |      | 293  | 442            | 14.1913761829 |

|              |          |      |      |     |               |
|--------------|----------|------|------|-----|---------------|
| NM_001003702 | ARHGEF35 |      | 593  | 679 | 13.0214511814 |
| NM_007010    | DDX52    | 873  | 929  |     | 6.38992774646 |
| NM_007010    | DDX52    | 961  | 1043 |     | 5.39377159632 |
| NM_007010    | DDX52    | 3251 | 3294 |     | 5.30980613725 |
| NM_007010    | DDX52    | 1117 | 1279 |     | 5.39394534663 |
| NM_007010    | DDX52    | 634  | 693  |     | 7.39393861558 |
| NM_007010    | DDX52    | 3044 | 3122 |     | 6.38992774646 |
| NM_007013    | WWP1     | 2945 | 3020 |     | 5.49339745391 |
| NM_007013    | WWP1     | 3563 | 3608 |     | 3.49339745391 |
| NM_007013    | WWP1     | 3115 | 3178 |     | 5.49357096831 |
| NM_007013    | WWP1     | 3021 | 3075 |     | 4.49339745391 |
| NM_007013    | WWP1     | 1599 | 1681 |     | 4.49357096831 |
| NM_007014    | WWP2     | 4308 | 4348 |     | 6.4702437861  |
| NM_007014    | WWP2     | 423  | 443  |     | 5.39012217689 |
| NM_001164603 | ASXL1    | 483  | 592  |     | 6.14044239276 |
| NM_001164603 | ASXL1    | 45   | 91   |     | 4.05630318337 |
| NM_005775    | SORBS3   | 2137 | 2204 |     | 5.73329864858 |
| NM_005775    | SORBS3   | 1861 | 1928 |     | 4.73714249844 |
| NM_005775    | SORBS3   | 1754 | 1838 |     | 4.73714249844 |
| NM_005775    | SORBS3   | 2276 | 2363 |     | 4.73329864858 |
| NM_006499    | LGALS8   | 437  | 507  |     | 4.82956754455 |
| NM_006499    | LGALS8   | 340  | 391  |     | 5.829567537   |
| NM_006499    | LGALS8   | 2475 | 2535 |     | 3.82956730863 |
| NM_006499    | LGALS8   | 5151 | 5195 |     | 5.82554994437 |
| NM_006499    | LGALS8   | 1067 | 1149 |     | 4.82554994437 |
| NM_006496    | GNAI3    | 668  | 728  |     | 4.97349021032 |
| NM_006496    | GNAI3    | 410  | 470  |     | 4.55827896072 |
| NM_006496    | GNAI3    | 490  | 527  |     | 2.88935100094 |
| NM_006496    | GNAI3    | 841  | 931  |     | 5.29541830521 |
| NM_006496    | GNAI3    | 250  | 313  |     | 3.97349021032 |
| NM_006496    | GNAI3    | 1175 | 1286 |     | 4.97349021032 |
| NM_006496    | GNAI3    | 326  | 355  |     | 2.88935100094 |
| NM_006496    | GNAI3    | 1362 | 1422 |     | 4.55443511087 |
| NM_006496    | GNAI3    | 731  | 810  |     | 4.97349021032 |
| NM_006496    | GNAI3    | 2261 | 2384 |     | 4.55845271104 |
| NM_001005862 | ERBB2    | 3967 | 4052 |     | 4.80025733905 |
| NM_001005862 | ERBB2    | 3823 | 3888 |     | 5.8002573466  |
| NM_001005862 | ERBB2    | 4428 | 4490 |     | 5.80025711068 |
| NM_001005862 | ERBB2    | 1667 | 1709 |     | 4.79623974642 |
| NM_001005862 | ERBB2    | 2195 | 2242 |     | 4.80008359628 |
| NM_001005862 | ERBB2    | 3498 | 3563 |     | 6.38521984732 |
| NM_001005862 | ERBB2    | 3439 | 3491 |     | 4.80008359628 |
| NM_001005862 | ERBB2    | 1230 | 1267 |     | 4.80025711068 |
| NM_001005862 | ERBB2    | 3618 | 3711 |     | 5.80025061554 |
| NM_001005862 | ERBB2    | 1503 | 1539 |     | 4.79623974642 |
| NM_001005862 | ERBB2    | 1750 | 1890 |     | 7.38521984732 |
| NM_001005862 | ERBB2    | 1892 | 1993 |     | 4.8002573466  |
| NM_001005862 | ERBB2    | 2285 | 2329 |     | 4.79623974642 |
| NM_001005862 | ERBB2    | 659  | 707  |     | 4.80025711068 |
| NM_001005862 | ERBB2    | 3338 | 3436 |     | 7.60761226865 |

|              |        |      |      |               |
|--------------|--------|------|------|---------------|
| NM_001005862 | ERBB2  | 1332 | 1436 | 7.97018234804 |
| NM_001005862 | ERBB2  | 2781 | 2891 | 6.8002573466  |
| NM_001005862 | ERBB2  | 763  | 873  | 7.12218544148 |
| NM_001005862 | ERBB2  | 3046 | 3163 | 7.38521984732 |
| NM_001005862 | ERBB2  | 963  | 1172 | 7.12218544148 |
| NM_001005862 | ERBB2  | 4624 | 4754 | 6.38521984732 |
| NM_001005862 | ERBB2  | 2065 | 2154 | 5.79623974642 |
| NM_001005862 | ERBB2  | 2367 | 2526 | 7.12218544148 |
| NM_001005862 | ERBB2  | 1544 | 1657 | 4.8002573466  |
| NM_001005862 | ERBB2  | 2904 | 3041 | 5.8002573466  |
| NM_001005862 | ERBB2  | 3189 | 3293 | 5.8002573466  |
| NM_001005862 | ERBB2  | 2542 | 2724 | 7.97018234804 |
| NM_006494    | ERF    | 710  | 774  | 7.8428362433  |
| NM_006494    | ERF    | 859  | 966  | 7.84283624331 |
| NM_006494    | ERF    | 1891 | 1932 | 7.84266249299 |
| NM_006494    | ERF    | 646  | 702  | 7.84282951225 |
| NM_006494    | ERF    | 1996 | 2038 | 7.84283623576 |
| NM_006494    | ERF    | 2164 | 2231 | 8.84283624331 |
| NM_006494    | ERF    | 2669 | 2699 | 6.84282951225 |
| NM_006494    | ERF    | 329  | 363  | 6.84282951225 |
| NM_001081004 | COMMD5 | 130  | 180  | 8.49318930923 |
| NM_006493    | CLN5   | 1364 | 1441 | 8.89737919789 |
| NM_006493    | CLN5   | 948  | 1008 | 8.89336159794 |
| NM_006493    | CLN5   | 551  | 650  | 11.0673041996 |
| NM_006493    | CLN5   | 1053 | 1159 | 9.89737919811 |
| NM_006493    | CLN5   | 2747 | 2793 | 8.89336159794 |
| NM_006493    | CLN5   | 846  | 945  | 9.89737919811 |
| NM_006493    | CLN5   | 342  | 545  | 11.7047341202 |
| NM_006493    | CLN5   | 652  | 837  | 10.4823416988 |
| NM_002940    | ABCE1  | 501  | 560  | 6.35643031184 |
| NM_002940    | ABCE1  | 3219 | 3259 | 5.767456942   |
| NM_002940    | ABCE1  | 2220 | 2298 | 5.77147454195 |
| NM_002940    | ABCE1  | 579  | 646  | 5.77146781112 |
| NM_002940    | ABCE1  | 1867 | 1948 | 7.3564370429  |
| NM_002940    | ABCE1  | 981  | 1034 | 6.35643704289 |
| NM_002940    | ABCE1  | 313  | 426  | 7.09340263706 |
| NM_002940    | ABCE1  | 2314 | 2408 | 6.3564370429  |
| NM_002940    | ABCE1  | 1526 | 1591 | 6.77147453463 |
| NM_002940    | ABCE1  | 825  | 929  | 7.3564370429  |
| NM_002940    | ABCE1  | 1613 | 1683 | 5.77147454217 |
| NM_002940    | ABCE1  | 3391 | 3474 | 5.77147430626 |
| NM_002940    | ABCE1  | 3285 | 3380 | 6.77147454217 |
| NM_002940    | ABCE1  | 1196 | 1320 | 8.3564370429  |
| NM_002940    | ABCE1  | 2144 | 2216 | 4.77146781112 |
| NM_182760    | SUMF1  | 903  | 992  | 9.49806285428 |
| NM_182760    | SUMF1  | 1288 | 1335 | 7.90908275338 |
| NM_182760    | SUMF1  | 1636 | 1680 | 9.49805612322 |
| NM_182760    | SUMF1  | 1206 | 1266 | 8.91310034601 |
| NM_182760    | SUMF1  | 1718 | 1771 | 9.91310035333 |
| NM_182760    | SUMF1  | 1035 | 1171 | 11.083025355  |

|              |         |      |      |               |
|--------------|---------|------|------|---------------|
| NM_182760    | SUMF1   | 437  | 530  | 10.9131003536 |
| NM_032307    | C9orf64 | 1310 | 1359 | 5.50553568518 |
| NM_032307    | C9orf64 | 884  | 932  | 5.5095465543  |
| NM_032307    | C9orf64 | 1084 | 1135 | 5.5095465543  |
| NM_032307    | C9orf64 | 933  | 1023 | 6.5095532778  |
| NM_032307    | C9orf64 | 596  | 676  | 7.5095532778  |
| NM_001166306 | TMEM44  | 1650 | 1726 | 9.27295386706 |
| NM_001166306 | TMEM44  | 950  | 1028 | 9.85790963673 |
| NM_001166306 | TMEM44  | 483  | 576  | 10.2729538671 |
| NM_001166306 | TMEM44  | 228  | 274  | 9.27278011674 |
| NM_001166306 | TMEM44  | 1105 | 1219 | 8.27295386706 |
| NM_001166306 | TMEM44  | 1999 | 2093 | 10.5948819619 |
| NM_178558    | ZNF680  | 2726 | 2791 | 8.20964719254 |
| NM_138802    | ZFAND2B | 531  | 596  | 4.87900979637 |
| NM_138802    | ZFAND2B | 682  | 767  | 4.29404729586 |
| NM_138802    | ZFAND2B | 327  | 406  | 4.87883604627 |
| NM_001114618 | MGAT1   | 1748 | 1816 | 8.55464854075 |
| NM_001114618 | MGAT1   | 1060 | 1198 | 9.55464854075 |
| NM_001114618 | MGAT1   | 2063 | 2134 | 8.13961104147 |
| NM_001114618 | MGAT1   | 1953 | 1993 | 6.55063094058 |
| NM_001114618 | MGAT1   | 2753 | 2824 | 7.55063094058 |
| NM_001114618 | MGAT1   | 1630 | 1721 | 8.13961104147 |
| NM_001114618 | MGAT1   | 648  | 689  | 6.55063094058 |
| NM_001114618 | MGAT1   | 2237 | 2295 | 7.55464830483 |
| NM_001114618 | MGAT1   | 757  | 849  | 8.13961104147 |
| NM_001114618 | MGAT1   | 1854 | 1948 | 8.13961104147 |
| NM_001114618 | MGAT1   | 1220 | 1325 | 6.55464854075 |
| NM_001114618 | MGAT1   | 1385 | 1616 | 9.36200346281 |
| NM_001114618 | MGAT1   | 3051 | 3169 | 7.55464854075 |
| NM_001114618 | MGAT1   | 501  | 625  | 8.13961104147 |
| NM_001114618 | MGAT1   | 2298 | 2376 | 6.55464830483 |
| NM_001114618 | MGAT1   | 852  | 911  | 8.13960431042 |
| NM_002763    | PROX1   | 3098 | 3152 | 4.79509530433 |
| NM_002763    | PROX1   | 4172 | 4209 | 4.79509530433 |
| NM_002763    | PROX1   | 6226 | 6275 | 6.46419700689 |
| NM_002763    | PROX1   | 7364 | 7428 | 6.46419701443 |
| NM_002763    | PROX1   | 1507 | 1572 | 6.46419701444 |
| NM_002763    | PROX1   | 316  | 403  | 4.87923451372 |
| NM_002763    | PROX1   | 6048 | 6115 | 5.8792342778  |
| NM_002763    | PROX1   | 7459 | 7516 | 7.2011626086  |
| NM_002763    | PROX1   | 5883 | 5944 | 5.87521691354 |
| NM_002763    | PROX1   | 4654 | 4747 | 5.87922778266 |
| NM_002763    | PROX1   | 2759 | 2894 | 6.46419701444 |
| NM_002763    | PROX1   | 2418 | 2459 | 5.87521691354 |
| NM_002763    | PROX1   | 7764 | 7868 | 4.87923450617 |
| NM_002763    | PROX1   | 2213 | 2302 | 5.87923451372 |
| NM_002763    | PROX1   | 1967 | 2037 | 5.8792342778  |
| NM_002763    | PROX1   | 1177 | 1251 | 4.87923451372 |
| NM_002763    | PROX1   | 2460 | 2544 | 4.87923451349 |
| NM_006423    | RABAC1  | 583  | 641  | 9.22213540965 |

|              |          |      |      |                    |
|--------------|----------|------|------|--------------------|
| NM_006423    | RABAC1   | 253  | 434  | 10.5440637405      |
| NM_001145191 | FAM200B  | 2944 | 3017 | 9.16396056927      |
| NM_001145199 | C12orf75 |      | 476  | 523 6.15429524989  |
| NM_014623    | MEA1     | 646  | 695  | 3.02829348651      |
| NM_014623    | MEA1     | 131  | 245  | 4.61727358741      |
| NM_014624    | S100A6   | 259  | 303  | 4.30542168419      |
| NM_014624    | S100A6   | 307  | 659  | 8.39288476136      |
| NM_014628    | MAD2L1BP |      | 523  | 554 7.65380203829  |
| NM_014628    | MAD2L1BP |      | 976  | 1081 6.65781963846 |
| NM_014629    | ARHGEF10 |      | 2936 | 2990 13.4896173959 |
| NM_014629    | ARHGEF10 |      | 2537 | 2604 11.9086724878 |
| NM_014629    | ARHGEF10 |      | 4897 | 4964 12.9046548952 |
| NM_003713    | PPAP2B   | 1774 | 1844 | 6.3398943126       |
| NM_003713    | PPAP2B   | 2102 | 2158 | 7.340067827        |
| NM_003713    | PPAP2B   | 552  | 631  | 6.340067827        |
| NM_003713    | PPAP2B   | 2537 | 2574 | 6.92101296347      |
| NM_003713    | PPAP2B   | 265  | 350  | 8.34006806292      |
| NM_003713    | PPAP2B   | 1244 | 1305 | 6.92502383259      |
| NM_003713    | PPAP2B   | 1145 | 1180 | 7.33605046275      |
| NM_003713    | PPAP2B   | 1043 | 1125 | 8.66199615781      |
| NM_003713    | PPAP2B   | 661  | 719  | 6.3398943126       |
| NM_003713    | PPAP2B   | 1510 | 1618 | 6.92503056364      |
| NM_003713    | PPAP2B   | 780  | 1000 | 9.24695865853      |
| NM_003713    | PPAP2B   | 1873 | 1969 | 6.92503056364      |
| NM_003713    | PPAP2B   | 1322 | 1493 | 9.14742298498      |
| NM_003714    | STC2     | 1469 | 1528 | 6.79786759102      |
| NM_003714    | STC2     | 3117 | 3165 | 5.12876588847      |
| NM_003714    | STC2     | 1530 | 1578 | 6.20888749768      |
| NM_003714    | STC2     | 3674 | 3717 | 5.12876588847      |
| NM_003714    | STC2     | 1794 | 1860 | 6.21290509785      |
| NM_003714    | STC2     | 4558 | 4677 | 6.21290509785      |
| NM_003714    | STC2     | 1895 | 1952 | 5.21290486193      |
| NM_003715    | US01     | 962  | 1021 | 4.62851021338      |
| NM_003715    | US01     | 1759 | 1827 | 6.21347295002      |
| NM_003715    | US01     | 917  | 955  | 3.54437123992      |
| NM_003715    | US01     | 1080 | 1136 | 3.62449284913      |
| NM_003715    | US01     | 3213 | 3250 | 3.62833669898      |
| NM_003715    | US01     | 3487 | 3535 | 5.2132991997       |
| NM_003715    | US01     | 2114 | 2171 | 5.2134727141       |
| NM_003715    | US01     | 2524 | 2584 | 5.21347295002      |
| NM_003715    | US01     | 1573 | 1641 | 5.2132991997       |
| NM_003715    | US01     | 3109 | 3167 | 4.62850371825      |
| NM_003715    | US01     | 3687 | 3725 | 4.62833669898      |
| NM_003715    | US01     | 255  | 326  | 4.62449284913      |
| NM_003715    | US01     | 2958 | 3005 | 4.54437123992      |
| NM_003715    | US01     | 527  | 575  | 4.62851021338      |
| NM_003715    | US01     | 327  | 527  | 7.32895016744      |
| NM_003715    | US01     | 1430 | 1509 | 6.43586537136      |
| NM_003715    | US01     | 2592 | 2686 | 5.6285104493       |
| NM_003715    | US01     | 3335 | 3433 | 5.21347295002      |

|              |       |      |      |               |
|--------------|-------|------|------|---------------|
| NM_003715    | US01  | 2221 | 2299 | 4.62851044908 |
| NM_003715    | US01  | 1258 | 1422 | 6.79843545074 |
| NM_003715    | US01  | 2791 | 2923 | 4.6285104493  |
| NM_003715    | US01  | 790  | 885  | 5.21347295002 |
| NM_001145442 | POTEM | 2316 | 2371 | 14.4834962971 |
| NM_001145442 | POTEM | 3028 | 3068 | 12.6761413751 |
| NM_001145442 | POTEM | 2591 | 2623 | 12.6761411391 |
| NM_001145442 | POTEM | 3203 | 3250 | 11.6721237749 |
| NM_001145442 | POTEM | 2130 | 2181 | 14.2611038758 |
| NM_001145442 | POTEM | 1994 | 2083 | 14.4834962971 |
| NM_001145442 | POTEM | 2788 | 2867 | 13.6761413751 |
| NM_001145442 | POTEM | 2438 | 2467 | 12.6721237749 |
| NM_181657    | LTB4R | 485  | 565  | 10.8257979455 |
| NM_001145440 | TYW1B | 586  | 640  | 9.50592340005 |
| NM_001145440 | TYW1B | 949  | 986  | 7.83682168995 |
| NM_001145440 | TYW1B | 1356 | 1426 | 8.92095416828 |
| NM_001145440 | TYW1B | 1573 | 1612 | 7.92096089933 |
| NM_001145440 | TYW1B | 1026 | 1078 | 7.92095416828 |
| NM_001145440 | TYW1B | 1860 | 1939 | 8.92096089933 |
| NM_001145440 | TYW1B | 1943 | 2019 | 9.92096089933 |
| NM_001145440 | TYW1B | 2135 | 2234 | 10.5059234001 |
| NM_001145440 | TYW1B | 366  | 462  | 9.50592340005 |
| NM_018502    | TMC06 | 1616 | 1688 | 7.95651511137 |
| NM_001145444 | SCAF4 | 700  | 759  | 7.26882984118 |
| NM_001145444 | SCAF4 | 2777 | 2871 | 8.00579543535 |
| NM_001145444 | SCAF4 | 1461 | 1500 | 5.67984974029 |
| NM_001145444 | SCAF4 | 2549 | 2642 | 5.68386734046 |
| NM_001145444 | SCAF4 | 1080 | 1147 | 6.68386734046 |
| NM_001145444 | SCAF4 | 959  | 1025 | 6.67984974029 |
| NM_001145444 | SCAF4 | 1159 | 1226 | 5.68386060941 |
| NM_001145444 | SCAF4 | 828  | 924  | 7.26882984118 |
| NM_001145444 | SCAF4 | 2660 | 2711 | 5.68386060941 |
| NM_001145444 | SCAF4 | 2141 | 2212 | 7.68386734046 |
| NM_001145444 | SCAF4 | 2891 | 2939 | 6.67984974029 |
| NM_001145444 | SCAF4 | 3809 | 3866 | 5.67984974029 |
| NM_001145444 | SCAF4 | 2053 | 2136 | 5.68386060941 |
| NM_001145444 | SCAF4 | 2220 | 2293 | 5.68386060941 |
| NM_001145444 | SCAF4 | 1515 | 1653 | 7.26882984118 |
| NM_018509    | LRR59 | 236  | 347  | 5.34790455716 |
| NM_018509    | LRR59 | 2333 | 2370 | 4.61093896277 |
| NM_018509    | LRR59 | 2250 | 2316 | 4.02596973121 |
| NM_018509    | LRR59 | 122  | 185  | 3.94183725288 |
| NM_018509    | LRR59 | 2388 | 2462 | 4.02597646227 |
| NM_018509    | LRR59 | 1104 | 1182 | 3.02597646227 |
| NM_018509    | LRR59 | 348  | 641  | 7.54953841833 |
| NM_018509    | LRR59 | 2503 | 2722 | 6.48540808091 |
| NM_018509    | LRR59 | 1013 | 1081 | 4.02597622635 |
| NM_018509    | LRR59 | 2074 | 2128 | 3.0219588621  |
| NM_018509    | LRR59 | 1193 | 1365 | 6.61093896299 |
| NM_018509    | LRR59 | 1784 | 1998 | 6.34790455716 |

|              |         |      |      |                |
|--------------|---------|------|------|----------------|
| NM_014999    | RAB21   | 1916 | 1983 | 4.17718465713  |
| NM_014999    | RAB21   | 745  | 786  | 4.59222192804  |
| NM_014999    | RAB21   | 899  | 938  | 4.17701091436  |
| NM_014999    | RAB21   | 945  | 996  | 3.59204841364  |
| NM_014999    | RAB21   | 344  | 377  | 4.17701091436  |
| NM_014999    | RAB21   | 585  | 644  | 4.1731670645   |
| NM_014999    | RAB21   | 32   | 123  | 5.39957708601  |
| NM_014999    | RAB21   | 383  | 429  | 2.58820456378  |
| NM_014999    | RAB21   | 1318 | 1359 | 2.59222215641  |
| NM_014991    | WDFY3   | 9439 | 9488 | 7.85218519354  |
| NM_014991    | WDFY3   | 3725 | 3819 | 7.936324167    |
| NM_014997    | KLHDC10 | 2572 | 2663 | 7.64274481435  |
| NM_014997    | KLHDC10 | 1614 | 1696 | 8.96467290924  |
| NM_014997    | KLHDC10 | 496  | 550  | 7.64275130948  |
| NM_014997    | KLHDC10 | 1134 | 1187 | 6.64274481435  |
| NM_014997    | KLHDC10 | 1952 | 2009 | 7.64257779509  |
| NM_014997    | KLHDC10 | 1376 | 1484 | 8.6427515454   |
| NM_001005849 | SUM02   | 647  | 684  | -1.13027312959 |
| NM_001005849 | SUM02   | 824  | 919  | 1.67708202839  |
| NM_001005849 | SUM02   | 505  | 548  | -1.21441210305 |
| NM_001005849 | SUM02   | 49   | 265  | 3.32915872497  |
| NM_001005849 | SUM02   | 318  | 494  | 3.03965210777  |
| NM_001005849 | SUM02   | 724  | 818  | 1.19165520122  |
| NM_014444    | TUBGCP4 | 3404 | 3472 | 6.73431969006  |
| NM_014444    | TUBGCP4 | 2498 | 2555 | 6.81845889922  |
| NM_014444    | TUBGCP4 | 686  | 749  | 8.40342139262  |
| NM_014444    | TUBGCP4 | 1878 | 1916 | 7.73431969006  |
| NM_014444    | TUBGCP4 | 1499 | 1572 | 9.14038699433  |
| NM_014444    | TUBGCP4 | 4001 | 4046 | 8.40324764985  |
| NM_014444    | TUBGCP4 | 3325 | 3370 | 6.73431969006  |
| NM_014444    | TUBGCP4 | 1102 | 1170 | 8.81845889944  |
| NM_014444    | TUBGCP4 | 1247 | 1428 | 10.2778905181  |
| NM_014444    | TUBGCP4 | 537  | 593  | 8.40342139994  |
| NM_014444    | TUBGCP4 | 1718 | 1779 | 8.40342139262  |
| NM_014444    | TUBGCP4 | 848  | 931  | 8.40342140016  |
| NM_014444    | TUBGCP4 | 371  | 513  | 8.81845889944  |
| NM_014444    | TUBGCP4 | 2161 | 2317 | 9.40342140016  |
| NM_014444    | TUBGCP4 | 1928 | 2114 | 9.81845889944  |
| NM_014445    | SERP1   | 1949 | 1999 | 3.15547821711  |
| NM_014445    | SERP1   | 1871 | 1933 | 3.15547821711  |
| NM_014445    | SERP1   | 256  | 341  | 4.74445158695  |
| NM_014445    | SERP1   | 113  | 204  | 4.74445158695  |
| NM_014445    | SERP1   | 503  | 787  | 7.85993553542  |
| NM_005717    | ARPC5   | 1278 | 1342 | 5.55777069535  |
| NM_005717    | ARPC5   | 1409 | 1489 | 5.33537827401  |
| NM_005717    | ARPC5   | 1672 | 1720 | 2.74639817312  |
| NM_005717    | ARPC5   | 550  | 657  | 6.55777069535  |
| NM_005717    | ARPC5   | 1151 | 1234 | 4.33537826646  |
| NM_005717    | ARPC5   | 1525 | 1576 | 4.33537826646  |
| NM_005717    | ARPC5   | 676  | 874  | 6.83787861454  |



|              |           |      |      |               |               |
|--------------|-----------|------|------|---------------|---------------|
| NM_005717    | ARPC5     | 397  | 504  | 5.07234386818 |               |
| NM_005717    | ARPC5     | 1913 | 2003 | 4.75041577329 |               |
| NM_005717    | ARPC5     | 1010 | 1075 | 4.33537827401 |               |
| NM_005717    | ARPC5     | 188  | 374  | 6.33537827401 |               |
| NM_152362    | TNFAIP8L1 |      | 3450 | 3517          | 8.77045352653 |
| NM_152362    | TNFAIP8L1 |      | 59   | 129           | 8.76643592636 |
| NM_152362    | TNFAIP8L1 |      | 756  | 870           | 10.3554160273 |
| NM_152362    | TNFAIP8L1 |      | 3257 | 3355          | 10.770453519  |
| NM_152362    | TNFAIP8L1 |      | 3146 | 3204          | 8.68631431715 |
| NM_152362    | TNFAIP8L1 |      | 3589 | 3723          | 11.7704535265 |
| NM_152362    | TNFAIP8L1 |      | 2596 | 2650          | 8.76643592636 |
| NM_080491    | GAB2      | 3780 | 3849 | 8.31722640373 |               |
| NM_152367    | MAB21L3   | 3169 | 3226 | 11.6031024688 |               |
| NM_152367    | MAB21L3   | 3015 | 3158 | 10.6031024688 |               |
| NM_014448    | ARHGEF16  |      | 2421 | 2463          | 7.98931441364 |
| NM_014448    | ARHGEF16  |      | 244  | 296           | 6.40836278203 |
| NM_014448    | ARHGEF16  |      | 1043 | 1103          | 6.3242303037  |
| NM_014448    | ARHGEF16  |      | 1784 | 1873          | 7.40836278203 |
| NM_001168301 | KLHL13    | 868  | 918  | 11.3062946752 |               |
| NM_001168301 | KLHL13    | 779  | 851  | 11.3063013987 |               |
| NM_001168301 | KLHL13    | 1000 | 1084 | 11.3062946752 |               |
| NM_001168301 | KLHL13    | 1530 | 1588 | 11.891263907  |               |
| NM_001168301 | KLHL13    | 273  | 333  | 12.3022838061 |               |
| NM_001168301 | KLHL13    | 381  | 479  | 10.3022838061 |               |
| NM_001168301 | KLHL13    | 2003 | 2122 | 12.3063014063 |               |
| NM_001168301 | KLHL13    | 928  | 985  | 10.306127656  |               |
| NM_001168301 | KLHL13    | 576  | 650  | 10.3063011704 |               |
| NM_001168301 | KLHL13    | 2340 | 2434 | 10.3062946752 |               |
| NM_001162384 | ARHGEF2   | 702  | 786  | 8.24854517778 |               |
| NM_001162384 | ARHGEF2   | 3112 | 3186 | 6.92661684698 |               |
| NM_001162384 | ARHGEF2   | 3604 | 3648 | 8.24853844673 |               |
| NM_001162384 | ARHGEF2   | 1503 | 1568 | 7.51157285256 |               |
| NM_001162384 | ARHGEF2   | 2105 | 2188 | 5.92259948272 |               |
| NM_001162384 | ARHGEF2   | 3344 | 3398 | 5.92259948272 |               |
| NM_001162384 | ARHGEF2   | 2825 | 2904 | 5.9266170829  |               |
| NM_001162384 | ARHGEF2   | 1651 | 1722 | 7.92661035184 |               |
| NM_001162384 | ARHGEF2   | 2336 | 2387 | 6.84247787351 |               |
| NM_001162384 | ARHGEF2   | 580  | 695  | 8.24854517778 |               |
| NM_001162384 | ARHGEF2   | 1099 | 1145 | 6.92644333258 |               |
| NM_001162384 | ARHGEF2   | 920  | 1070 | 7.9266170829  |               |
| NM_032788    | ZNF514    | 2621 | 2658 | 7.99975658611 |               |
| NM_022458    | LMBR1     | 3686 | 3733 | 7.1137601202  |               |
| NM_022458    | LMBR1     | 1541 | 1587 | 8.78286159438 |               |
| NM_022458    | LMBR1     | 566  | 596  | 8.69872262092 |               |
| NM_022458    | LMBR1     | 472  | 529  | 8.19789932936 |               |
| NM_022458    | LMBR1     | 2771 | 2835 | 8.19789259853 |               |
| NM_022458    | LMBR1     | 2052 | 2110 | 7.19388172941 |               |
| NM_022458    | LMBR1     | 1921 | 1963 | 8.19789259853 |               |
| NM_022458    | LMBR1     | 1841 | 1902 | 8.19388172941 |               |
| NM_022458    | LMBR1     | 3910 | 3968 | 8.19388172941 |               |

|              |           |      |      |                    |
|--------------|-----------|------|------|--------------------|
| NM_022458    | LMBR1     | 2998 | 3052 | 8.19388172941      |
| NM_022458    | LMBR1     | 2226 | 2291 | 9.19789932958      |
| NM_022458    | LMBR1     | 1348 | 1539 | 10.367824331       |
| NM_022458    | LMBR1     | 820  | 963  | 9.7828618303       |
| NM_022458    | LMBR1     | 970  | 1046 | 7.19789932203      |
| NM_022458    | LMBR1     | 352  | 463  | 8.19789932958      |
| NM_022458    | LMBR1     | 1713 | 1808 | 9.19789932958      |
| NM_022458    | LMBR1     | 1624 | 1698 | 8.7828618303       |
| NM_022458    | LMBR1     | 1212 | 1332 | 10.367824331       |
| NM_022458    | LMBR1     | 603  | 699  | 10.0052542516      |
| NM_022459    | XP04      | 4454 | 4543 | 8.98864976207      |
| NM_004237    | TRIP13    | 1016 | 1097 | 9.38378310717      |
| NM_004237    | TRIP13    | 2003 | 2088 | 7.7988205989       |
| NM_022450    | RHBDF1    | 2322 | 2388 | 9.56848871368      |
| NM_022450    | RHBDF1    | 2511 | 2562 | 10.5684887135      |
| NM_022450    | RHBDF1    | 2390 | 2464 | 11.8904168086      |
| NM_022450    | RHBDF1    | 2098 | 2132 | 9.48434950429      |
| NM_022450    | RHBDF1    | 2174 | 2226 | 10.4843495043      |
| NM_022450    | RHBDF1    | 2602 | 2671 | 11.1534512144      |
| NM_022450    | RHBDF1    | 2793 | 2969 | 11.5684887137      |
| NM_022453    | RNF25     | 873  | 921  | 7.98683245846      |
| NM_001163922 | VSIG10L   | 136  | 157  | 12.1206160296      |
| NM_004231    | ATP6V1F   | 388  | 443  | 5.03385331036      |
| NM_004231    | ATP6V1F   | 123  | 218  | 7.03385331037      |
| NM_004231    | ATP6V1F   | 578  | 680  | 5.03385331037      |
| NM_004231    | ATP6V1F   | 520  | 577  | 5.61864206077      |
| NM_004231    | ATP6V1F   | 443  | 474  | 3.94971410099      |
| NM_020223    | FAM20C    | 498  | 561  | 6.35347320462      |
| NM_020223    | FAM20C    | 2650 | 2686 | 7.34945560444      |
| NM_020223    | FAM20C    | 277  | 334  | 6.34945560444      |
| NM_020223    | FAM20C    | 1032 | 1095 | 6.35346647356      |
| NM_001008390 | CGGBP1    | 2045 | 2100 | 6.45628927374      |
| NM_001008390 | CGGBP1    | 234  | 390  | 6.46030687391      |
| NM_001008395 | C7orf59   | 497  | 537  | 4.09071747353      |
| NM_001008395 | C7orf59   | 329  | 390  | 5.1746829326       |
| NM_001008395 | C7orf59   | 243  | 278  | 4.09071747353      |
| NM_001008395 | C7orf59   | 41   | 97   | 5.17484995186      |
| NM_001008395 | C7orf59   | 128  | 212  | 5.17485668292      |
| NM_001008395 | C7orf59   | 390  | 489  | 6.49678477781      |
| NM_017799    | C14orf101 |      | 569  | 605 9.21037057962  |
| NM_017799    | C14orf101 |      | 876  | 940 9.29049218883  |
| NM_017799    | C14orf101 |      | 653  | 689 10.8754546896  |
| NM_017799    | C14orf101 |      | 706  | 809 10.294509789   |
| NM_017799    | C14orf101 |      | 1676 | 1747 10.8794655587 |
| NM_017799    | C14orf101 |      | 1225 | 1320 11.294509789  |
| NM_017799    | C14orf101 |      | 963  | 1114 11.294509789  |
| NM_019108    | SMG9      | 1266 | 1344 | 10.3522288617      |
| NM_019108    | SMG9      | 925  | 983  | 9.93719135492      |
| NM_019108    | SMG9      | 83   | 133  | 9.35205511143      |
| NM_019108    | SMG9      | 2293 | 2337 | 8.3522288542       |

|              |          |      |      |                    |
|--------------|----------|------|------|--------------------|
| NM_019108    | SMG9     | 1520 | 1663 | 10.9371913625      |
| NM_019108    | SMG9     | 1830 | 1881 | 9.34821126157      |
| NM_019108    | SMG9     | 1027 | 1229 | 11.3522288617      |
| NM_019109    | ALG1     | 1109 | 1169 | 7.62017551072      |
| NM_019109    | ALG1     | 1751 | 1811 | 7.11917846907      |
| NM_019109    | ALG1     | 1050 | 1106 | 7.11533461921      |
| NM_019109    | ALG1     | 1847 | 1894 | 6.11935221917      |
| NM_019109    | ALG1     | 1394 | 1450 | 7.11935221939      |
| NM_019109    | ALG1     | 1169 | 1380 | 10.2892772208      |
| NM_019109    | ALG1     | 52   | 122  | 7.11917846907      |
| NM_019109    | ALG1     | 3254 | 3288 | 6.11917846907      |
| NM_019109    | ALG1     | 1557 | 1748 | 9.92670714145      |
| NM_019109    | ALG1     | 576  | 1036 | 11.0735485298      |
| NM_019109    | ALG1     | 202  | 547  | 10.7632084092      |
| NM_020964    | EPG5     | 2522 | 2591 | 10.4396071363      |
| NM_020961    | METTLL14 | 912  | 945  | 4.70850264213      |
| NM_020961    | METTLL14 | 972  | 1040 | 6.37358675206      |
| NM_019101    | APOM     | 334  | 415  | 4.28525843144      |
| NM_019107    | C19orf10 |      | 908  | 1018 7.95581668906 |
| NM_019107    | C19orf10 |      | 799  | 881 8.06273189298  |
| NM_019107    | C19orf10 |      | 381  | 788 9.6476943937   |
| NM_019107    | C19orf10 |      | 178  | 362 7.84033947164  |
| NM_019107    | C19orf10 |      | 75   | 127 4.2552032206   |
| NM_016108    | AIG1     | 173  | 220  | 5.67350970971      |
| NM_016108    | AIG1     | 81   | 152  | 6.67350970971      |
| NM_016108    | AIG1     | 506  | 611  | 6.2624898106       |
| NM_016108    | AIG1     | 223  | 499  | 9.2624898106       |
| NM_016108    | AIG1     | 675  | 781  | 6.67752730988      |
| NM_016107    | ZFR      | 1188 | 1269 | 5.20737965069      |
| NM_016107    | ZFR      | 1105 | 1166 | 4.20737965069      |
| NM_016107    | ZFR      | 3229 | 3300 | 5.79234215141      |
| NM_016107    | ZFR      | 2048 | 2140 | 5.79234215141      |
| NM_016107    | ZFR      | 425  | 482  | 4.20737291964      |
| NM_016107    | ZFR      | 2569 | 2659 | 5.79234215141      |
| NM_016107    | ZFR      | 1352 | 1450 | 6.79234215141      |
| NM_016107    | ZFR      | 1472 | 1524 | 5.79234215141      |
| NM_016107    | ZFR      | 2742 | 2799 | 6.79234215141      |
| NM_016107    | ZFR      | 737  | 782  | 4.20737965069      |
| NM_016107    | ZFR      | 1850 | 1909 | 4.20737941477      |
| NM_016107    | ZFR      | 3594 | 3739 | 6.52930774558      |
| NM_016107    | ZFR      | 2817 | 2946 | 7.79234215141      |
| NM_016107    | ZFR      | 2189 | 2275 | 5.79234215141      |
| NM_016107    | ZFR      | 3845 | 3973 | 6.20737965069      |
| NM_016107    | ZFR      | 2305 | 2548 | 7.52930774558      |
| NM_016107    | ZFR      | 4088 | 4163 | 6.52930774557      |
| NM_016107    | ZFR      | 42   | 145  | 6.20737965069      |
| NM_016107    | ZFR      | 2962 | 3091 | 6.79234215141      |
| NM_016107    | ZFR      | 1558 | 1698 | 5.20737965069      |
| NM_001143842 | TMEM106C |      | 1449 | 1551 7.29763897528 |
| NM_001143842 | TMEM106C |      | 864  | 920 7.71267647434  |

|              |          |      |      |      |               |
|--------------|----------|------|------|------|---------------|
| NM_001143842 | TMEM106C |      | 302  | 324  | 5.62853726518 |
| NM_001143842 | TMEM106C |      | 1372 | 1446 | 6.71267647456 |
| NM_001143842 | TMEM106C |      | 702  | 772  | 7.71267647456 |
| NM_001143842 | TMEM106C |      | 936  | 1075 | 8.52003139662 |
| NM_001143842 | TMEM106C |      | 1157 | 1329 | 9.29763897528 |
| NM_001143842 | TMEM106C |      | 199  | 281  | 8.03460456945 |
| NM_001143842 | TMEM106C |      | 348  | 503  | 8.882601476   |
| NM_001143842 | TMEM106C |      | 773  | 853  | 8.29763897528 |
| NM_001143842 | TMEM106C |      | 512  | 648  | 8.71267647456 |
| NM_016100    | NAA20    | 392  | 455  |      | 4.97686675225 |
| NM_016100    | NAA20    | 634  | 687  |      | 4.3077650497  |
| NM_016100    | NAA20    | 467  | 549  |      | 4.39190425908 |
| NM_016103    | SAR1B    | 947  | 988  |      | 6.64734530671 |
| NM_016103    | SAR1B    | 740  | 796  |      | 6.64734529917 |
| NM_016103    | SAR1B    | 2743 | 2807 |      | 5.06237607494 |
| NM_016103    | SAR1B    | 144  | 246  |      | 7.38431090088 |
| NM_016103    | SAR1B    | 256  | 395  |      | 8.64734530671 |
| NM_016103    | SAR1B    | 405  | 715  |      | 9.58594476205 |
| NM_021648    | TSPYL4   | 1483 | 1547 |      | 9.42717635205 |
| NM_001033025 | EXTL2    | 1291 | 1347 |      | 7.84132747281 |
| NM_001033025 | EXTL2    | 2431 | 2518 |      | 8.7612058636  |
| NM_001033025 | EXTL2    | 697  | 741  |      | 8.84517132266 |
| NM_001033025 | EXTL2    | 1455 | 1499 |      | 7.7612058636  |
| NM_001033024 | FBX07    | 1318 | 1382 |      | 4.15922486319 |
| NM_001033024 | FBX07    | 623  | 681  |      | 6.48115295808 |
| NM_001033024 | FBX07    | 689  | 741  |      | 4.15921813214 |
| NM_001033024 | FBX07    | 1045 | 1099 |      | 5.74418712799 |
| NM_001033024 | FBX07    | 397  | 472  |      | 5.74418736391 |
| NM_001033024 | FBX07    | 1649 | 1749 |      | 5.74418736391 |
| NM_001033024 | FBX07    | 266  | 336  |      | 5.15921813214 |
| NM_001033024 | FBX07    | 1433 | 1573 |      | 7.85966458133 |
| NM_001033024 | FBX07    | 828  | 1004 |      | 7.96657978525 |
| NM_001033024 | FBX07    | 169  | 254  |      | 5.15921813214 |
| NM_001033024 | FBX07    | 1101 | 1293 |      | 6.48115295808 |
| NM_001033024 | FBX07    | 482  | 611  |      | 6.48115295808 |
| NM_015711    | GLTSCR1  | 327  | 383  |      | 11.7499405193 |
| NM_015710    | GLTSCR2  | 348  | 396  |      | 5.7866265296  |
| NM_015710    | GLTSCR2  | 900  | 948  |      | 4.7866265296  |
| NM_015710    | GLTSCR2  | 758  | 798  |      | 5.86674813881 |
| NM_015710    | GLTSCR2  | 578  | 667  |      | 5.87076573898 |
| NM_015710    | GLTSCR2  | 260  | 333  |      | 6.45572823215 |
| NM_015710    | GLTSCR2  | 1227 | 1365 |      | 4.87076573898 |
| NM_015713    | RRM2B    | 1090 | 1149 |      | 6.63583476408 |
| NM_001159643 | MCTP2    | 2197 | 2244 |      | 8.45445220001 |
| NM_001159643 | MCTP2    | 1451 | 1525 |      | 10.1195363099 |
| NM_001159643 | MCTP2    | 1852 | 1902 |      | 8.53457380922 |
| NM_022841    | RFX7     | 6295 | 6343 |      | 7.27509505977 |
| NM_022841    | RFX7     | 3106 | 3177 |      | 8.27893890962 |
| NM_022841    | RFX7     | 3833 | 3890 |      | 8.27509505977 |
| NM_022841    | RFX7     | 1146 | 1195 |      | 8.19497345056 |

|              |          |      |      |               |               |
|--------------|----------|------|------|---------------|---------------|
| NM_015716    | MINK1    | 3077 | 3117 | 5.19607047368 |               |
| NM_015716    | MINK1    | 3366 | 3460 | 6.86517218378 |               |
| NM_015716    | MINK1    | 4426 | 4502 | 5.28020968306 |               |
| NM_015716    | MINK1    | 534  | 601  | 6.86517217623 |               |
| NM_015716    | MINK1    | 3316 | 3345 | 6.27619208289 |               |
| NM_015716    | MINK1    | 1146 | 1193 | 6.28020295201 |               |
| NM_015716    | MINK1    | 4085 | 4147 | 6.27619208289 |               |
| NM_015716    | MINK1    | 3892 | 3947 | 5.27619208289 |               |
| NM_015716    | MINK1    | 695  | 819  | 5.28020968306 |               |
| NM_015716    | MINK1    | 4223 | 4362 | 8.28020968306 |               |
| NM_015716    | MINK1    | 3223 | 3312 | 6.28020968306 |               |
| NM_001040162 | C16orf13 |      | 409  | 473           | 8.35986788421 |
| NM_001040162 | C16orf13 |      | 227  | 283           | 8.35970086494 |
| NM_138393    | REEP6    | 87   | 157  | 6.51390456859 |               |
| NM_138393    | REEP6    | 499  | 625  | 7.2508701703  |               |
| NM_138393    | REEP6    | 167  | 436  | 8.2508701703  |               |
| NM_138392    | SHKBP1   | 1207 | 1247 | 6.98860184718 |               |
| NM_138392    | SHKBP1   | 1110 | 1172 | 6.90848023797 |               |
| NM_138392    | SHKBP1   | 1394 | 1423 | 6.9926194398  |               |
| NM_138392    | SHKBP1   | 722  | 815  | 7.99261944713 |               |
| NM_138392    | SHKBP1   | 1817 | 1855 | 6.90848023797 |               |
| NM_138392    | SHKBP1   | 543  | 598  | 7.98860184718 |               |
| NM_138392    | SHKBP1   | 2012 | 2049 | 6.90848023797 |               |
| NM_138392    | SHKBP1   | 1476 | 1540 | 7.9926127163  |               |
| NM_138392    | SHKBP1   | 890  | 995  | 8.57758194807 |               |
| NM_138392    | SHKBP1   | 105  | 234  | 9.79997436941 |               |
| NM_138391    | TMEM183A |      | 644  | 693           | 6.12896028842 |
| NM_138391    | TMEM183A |      | 1380 | 1436          | 6.12494941931 |
| NM_138391    | TMEM183A |      | 1221 | 1324          | 7.45089511437 |
| NM_138391    | TMEM183A |      | 505  | 587           | 7.71392951265 |
| NM_138391    | TMEM183A |      | 971  | 1060          | 6.12896028842 |
| NM_138395    | MARS2    | 365  | 400  | 8.42261729716 |               |
| NM_138395    | MARS2    | 2442 | 2508 | 10.091545257  |               |
| NM_138395    | MARS2    | 809  | 860  | 8.50675627063 |               |
| NM_198216    | SNRPB    | 875  | 987  | 2.75122848564 |               |
| NM_198216    | SNRPB    | 698  | 797  | 1.16625925387 |               |
| NM_198216    | SNRPB    | 75   | 572  | 5.7208548366  |               |
| NM_198216    | SNRPB    | 581  | 659  | 2.75122848564 |               |
| NM_181553    | CMTM3    | 1700 | 1769 | 6.60368738597 |               |
| NM_181553    | CMTM3    | 275  | 338  | 6.51954841251 |               |
| NM_181553    | CMTM3    | 652  | 709  | 5.01871839012 |               |
| NM_181553    | CMTM3    | 475  | 549  | 6.01855137085 |               |
| NM_181553    | CMTM3    | 553  | 644  | 6.60368762189 |               |
| NM_181553    | CMTM3    | 1540 | 1639 | 7.34065321606 |               |
| NM_181553    | CMTM3    | 364  | 468  | 5.01872512117 |               |
| NM_000098    | CPT2     | 1143 | 1218 | 6.50981054848 |               |
| NM_000098    | CPT2     | 870  | 913  | 7.42567133932 |               |
| NM_000099    | CST3     | 671  | 741  | 2.09732698864 |               |
| NM_000099    | CST3     | 592  | 667  | 3.09732699619 |               |
| NM_000099    | CST3     | 103  | 167  | 3.09715324587 |               |

|           |        |      |      |               |
|-----------|--------|------|------|---------------|
| NM_000099 | CST3   | 288  | 388  | 3.09732699619 |
| NM_000099 | CST3   | 405  | 586  | 5.41925509108 |
| NM_000096 | CP     | 3601 | 3669 | 2.08589837545 |
| NM_000096 | CP     | 3518 | 3601 | 1.08589837545 |
| NM_000096 | CP     | 3732 | 3777 | 1.08589813953 |
| NM_000096 | CP     | 4075 | 4189 | 1.08589837545 |
| NM_000096 | CP     | 3669 | 3732 | 2.08572462513 |
| NM_000096 | CP     | 3439 | 3477 | 2.00175916606 |
| NM_000096 | CP     | 3014 | 3102 | 4.54532999409 |
| NM_000096 | CP     | 2556 | 2718 | 4.08589837545 |
| NM_000096 | CP     | 3270 | 3347 | 3.40782647034 |
| NM_000096 | CP     | 2833 | 2996 | 4.78633809359 |
| NM_000096 | CP     | 3920 | 4017 | 2.0858983679  |
| NM_000096 | CP     | 447  | 566  | 4.25582337689 |
| NM_000096 | CP     | 2154 | 2286 | 4.67086087617 |
| NM_000096 | CP     | 1096 | 1539 | 6.54532999409 |
| NM_000096 | CP     | 655  | 1095 | 6.51216313015 |
| NM_000096 | CP     | 2288 | 2533 | 4.78633809359 |
| NM_000096 | CP     | 1782 | 2152 | 6.29535174108 |
| NM_000096 | CP     | 3127 | 3256 | 4.54532999409 |
| NM_000096 | CP     | 237  | 442  | 5.54532999409 |
| NM_000097 | CPOX   | 869  | 930  | 5.4729888063  |
| NM_000097 | CPOX   | 964  | 1019 | 6.14209050886 |
| NM_000097 | CPOX   | 44   | 86   | 4.55712777977 |
| NM_000097 | CPOX   | 1107 | 1213 | 6.55712801569 |
| NM_000097 | CPOX   | 1260 | 1312 | 5.55712800814 |
| NM_000097 | CPOX   | 751  | 837  | 6.87905610302 |
| NM_015904 | EIF5B  | 4141 | 4193 | 3.68133572331 |
| NM_015904 | EIF5B  | 2449 | 2521 | 4.68133572332 |
| NM_015904 | EIF5B  | 2532 | 2605 | 3.68133572331 |
| NM_015904 | EIF5B  | 3111 | 3193 | 5.68133572332 |
| NM_015904 | EIF5B  | 2975 | 3059 | 4.26629821649 |
| NM_015904 | EIF5B  | 2799 | 2842 | 4.68133571577 |
| NM_015904 | EIF5B  | 2609 | 2745 | 5.68133572332 |
| NM_015904 | EIF5B  | 1920 | 2063 | 4.68133572332 |
| NM_015904 | EIF5B  | 1560 | 1622 | 4.26629822404 |
| NM_015904 | EIF5B  | 2184 | 2232 | 2.681161973   |
| NM_015904 | EIF5B  | 3845 | 3966 | 4.68133572332 |
| NM_015904 | EIF5B  | 3227 | 3343 | 4.26629822404 |
| NM_015904 | EIF5B  | 3732 | 3790 | 4.6813354874  |
| NM_015904 | EIF5B  | 279  | 371  | 2.68132899226 |
| NM_015904 | EIF5B  | 2236 | 2324 | 4.68133572331 |
| NM_015904 | EIF5B  | 494  | 601  | 3.68133572332 |
| NM_015904 | EIF5B  | 2080 | 2145 | 4.26228062386 |
| NM_015905 | TRIM24 | 2804 | 2875 | 6.17575948779 |
| NM_015905 | TRIM24 | 704  | 817  | 6.49768758268 |
| NM_015905 | TRIM24 | 1116 | 1177 | 4.17575275674 |
| NM_015905 | TRIM24 | 2956 | 3032 | 5.17575948779 |
| NM_015905 | TRIM24 | 2512 | 2564 | 6.49768757513 |
| NM_015905 | TRIM24 | 1751 | 1814 | 5.09162027841 |

|           |        |      |      |               |
|-----------|--------|------|------|---------------|
| NM_015905 | TRIM24 | 365  | 417  | 4.17174188762 |
| NM_015905 | TRIM24 | 2203 | 2255 | 5.17575275674 |
| NM_015905 | TRIM24 | 2067 | 2131 | 6.98311440985 |
| NM_015905 | TRIM24 | 3462 | 3512 | 4.17174188762 |
| NM_015905 | TRIM24 | 3086 | 3166 | 6.98311440985 |
| NM_015905 | TRIM24 | 1422 | 1523 | 4.17575948757 |
| NM_015905 | TRIM24 | 1988 | 2066 | 5.76072198851 |
| NM_015905 | TRIM24 | 425  | 459  | 4.17174188762 |
| NM_015905 | TRIM24 | 2594 | 2728 | 6.17575948779 |
| NM_015905 | TRIM24 | 3709 | 3790 | 6.17575948779 |
| NM_015906 | TRIM33 | 3130 | 3205 | 7.79347062349 |
| NM_015906 | TRIM33 | 641  | 677  | 7.05248766507 |
| NM_015906 | TRIM33 | 8189 | 8242 | 7.46752516435 |
| NM_015906 | TRIM33 | 8018 | 8101 | 6.38740355513 |
| NM_015906 | TRIM33 | 2967 | 3015 | 5.38740355513 |
| NM_015906 | TRIM33 | 2831 | 2949 | 7.05650525769 |
| NM_015906 | TRIM33 | 751  | 819  | 7.05650526524 |
| NM_015907 | LAP3   | 1041 | 1089 | 3.84954464809 |
| NM_015907 | LAP3   | 990  | 1040 | 3.76540543893 |
| NM_015907 | LAP3   | 555  | 605  | 3.26458214758 |
| NM_015907 | LAP3   | 1474 | 1517 | 2.26056454742 |
| NM_015907 | LAP3   | 321  | 410  | 4.58651024248 |
| NM_015907 | LAP3   | 249  | 291  | 3.76540543893 |
| NM_015907 | LAP3   | 860  | 953  | 4.26458214759 |
| NM_015907 | LAP3   | 1107 | 1188 | 4.58651024248 |
| NM_015907 | LAP3   | 1790 | 1874 | 4.26440839727 |
| NM_015907 | LAP3   | 1241 | 1470 | 5.07193706965 |
| NM_015907 | LAP3   | 647  | 782  | 5.26458214759 |
| NM_015902 | UBR5   | 6165 | 6222 | 4.23108937939 |
| NM_015902 | UBR5   | 4034 | 4099 | 6.63698293334 |
| NM_015902 | UBR5   | 9278 | 9320 | 4.23108937939 |
| NM_015902 | UBR5   | 1277 | 1331 | 5.31522185772 |
| NM_015902 | UBR5   | 2503 | 2557 | 6.31522858877 |
| NM_015902 | UBR5   | 5442 | 5486 | 4.3112109886  |
| NM_015902 | UBR5   | 8760 | 8809 | 5.23108937939 |
| NM_015902 | UBR5   | 4883 | 4938 | 5.23108937939 |
| NM_015902 | UBR5   | 9146 | 9185 | 5.90018435844 |
| NM_015902 | UBR5   | 3979 | 4021 | 4.23108937939 |
| NM_015902 | UBR5   | 2685 | 2753 | 5.90019108949 |
| NM_015902 | UBR5   | 3938 | 3977 | 5.89617348932 |
| NM_015902 | UBR5   | 752  | 845  | 5.89617348932 |
| NM_015902 | UBR5   | 478  | 541  | 5.23108937939 |
| NM_015902 | UBR5   | 4445 | 4472 | 4.23108937939 |
| NM_015902 | UBR5   | 854  | 912  | 4.3112109886  |
| NM_015902 | UBR5   | 4172 | 4209 | 6.31505483845 |
| NM_015902 | UBR5   | 2157 | 2205 | 6.31505483845 |
| NM_015902 | UBR5   | 3080 | 3175 | 5.31522858877 |
| NM_015902 | UBR5   | 3663 | 3767 | 6.31522858877 |
| NM_015902 | UBR5   | 8034 | 8096 | 6.31522185772 |
| NM_015902 | UBR5   | 5122 | 5233 | 5.31522185772 |

|              |         |      |      |               |
|--------------|---------|------|------|---------------|
| NM_015902    | UBR5    | 1564 | 1625 | 4.23108937939 |
| NM_015902    | UBR5    | 7901 | 7958 | 5.23108937939 |
| NM_015902    | UBR5    | 6403 | 6557 | 6.31522858877 |
| NM_015902    | UBR5    | 5919 | 6081 | 5.31522858877 |
| NM_021183    | RAP2C   | 2305 | 2345 | 4.04767492757 |
| NM_021183    | RAP2C   | 2231 | 2289 | 5.05169229182 |
| NM_021183    | RAP2C   | 3674 | 3761 | 4.05169252019 |
| NM_021183    | RAP2C   | 1824 | 1877 | 5.04767492757 |
| NM_021183    | RAP2C   | 1236 | 1327 | 6.05169252774 |
| NM_021183    | RAP2C   | 901  | 984  | 4.05169252752 |
| NM_021183    | RAP2C   | 601  | 680  | 5.63665502846 |
| NM_018462    | BRK1    | 559  | 629  | 5.45141718454 |
| NM_018462    | BRK1    | 53   | 111  | 5.45141718454 |
| NM_018462    | BRK1    | 267  | 311  | 4.44739958438 |
| NM_018462    | BRK1    | 820  | 873  | 5.44739958438 |
| NM_018462    | BRK1    | 382  | 437  | 5.95224047589 |
| NM_018462    | BRK1    | 443  | 499  | 6.03637967772 |
| NM_018462    | BRK1    | 135  | 238  | 6.03637968527 |
| NM_021184    | C6orf47 | 132  | 193  | 8.80104161044 |
| NM_001130440 | SRP9    | 1099 | 1168 | 6.08210578461 |
| NM_001130440 | SRP9    | 722  | 844  | 5.34514019044 |
| NM_001130440 | SRP9    | 1550 | 1590 | 5.34513345939 |
| NM_001130440 | SRP9    | 1354 | 1433 | 5.34514019044 |
| NM_001130440 | SRP9    | 1181 | 1354 | 7.84764053097 |
| NM_001130440 | SRP9    | 921  | 973  | 3.75616008955 |
| NM_001130440 | SRP9    | 487  | 641  | 5.34514019044 |
| NM_001130440 | SRP9    | 29   | 352  | 7.34514019044 |
| NM_001130447 | HAUS2   | 267  | 327  | 6.43195940011 |
| NM_001130447 | HAUS2   | 501  | 543  | 6.42794203586 |
| NM_001130447 | HAUS2   | 2629 | 2691 | 5.43178588571 |
| NM_001130447 | HAUS2   | 2696 | 2759 | 7.01692213675 |
| NM_001130447 | HAUS2   | 2440 | 2483 | 6.42794203586 |
| NM_001130447 | HAUS2   | 129  | 198  | 6.43195940011 |
| NM_001130445 | SSFA2   | 5189 | 5257 | 4.1225285912  |
| NM_001130445 | SSFA2   | 3100 | 3171 | 5.70749085623 |
| NM_001130445 | SSFA2   | 4126 | 4178 | 5.12235484111 |
| NM_001130445 | SSFA2   | 995  | 1045 | 5.12252835551 |
| NM_001130445 | SSFA2   | 2587 | 2628 | 6.44445668631 |
| NM_001130445 | SSFA2   | 3312 | 3361 | 6.12252835551 |
| NM_001130445 | SSFA2   | 4210 | 4261 | 6.12252859142 |
| NM_001130445 | SSFA2   | 4279 | 4358 | 6.12252859142 |
| NM_001130445 | SSFA2   | 4753 | 4802 | 5.70748436109 |
| NM_001130445 | SSFA2   | 875  | 952  | 5.70749109215 |
| NM_001130445 | SSFA2   | 1557 | 1618 | 5.1225285912  |
| NM_001130445 | SSFA2   | 3033 | 3074 | 5.12252859142 |
| NM_001130445 | SSFA2   | 3226 | 3302 | 5.12235484111 |
| NM_001130445 | SSFA2   | 4026 | 4088 | 4.11851099125 |
| NM_001130445 | SSFA2   | 4588 | 4651 | 5.12252186037 |
| NM_001130445 | SSFA2   | 1885 | 1985 | 6.70749109215 |
| NM_001130445 | SSFA2   | 3372 | 3488 | 5.12252835551 |



|              |       |      |      |                |
|--------------|-------|------|------|----------------|
| NM_001130445 | SSFA2 | 1199 | 1266 | 4.12252858388  |
| NM_001130445 | SSFA2 | 3564 | 3667 | 6.12252859142  |
| NM_001130445 | SSFA2 | 1813 | 1879 | 5.11851099125  |
| NM_001130445 | SSFA2 | 4461 | 4569 | 6.12252859142  |
| NM_001130445 | SSFA2 | 3688 | 3758 | 6.12252186037  |
| NM_001130445 | SSFA2 | 1049 | 1104 | 4.11851099125  |
| NM_001130445 | SSFA2 | 2864 | 2963 | 4.12252859142  |
| NM_001130445 | SSFA2 | 809  | 869  | 5.12235484111  |
| NM_004390    | CTSH  | 1378 | 1446 | 2.61701847759  |
| NM_004390    | CTSH  | 110  | 246  | 5.61701847759  |
| NM_004390    | CTSH  | 1136 | 1201 | 2.61300087742  |
| NM_004390    | CTSH  | 505  | 648  | 5.20198097831  |
| NM_004390    | CTSH  | 322  | 410  | 5.20198097831  |
| NM_004390    | CTSH  | 445  | 505  | 3.61701847004  |
| NM_004390    | CTSH  | 1037 | 1112 | 2.61701847758  |
| NM_004390    | CTSH  | 766  | 930  | 6.31745819573  |
| NM_004397    | DDX6  | 1433 | 1474 | 7.49490947551  |
| NM_004397    | DDX6  | 1898 | 1943 | 6.17298138062  |
| NM_004397    | DDX6  | 3030 | 3085 | 5.08884217124  |
| NM_004397    | DDX6  | 1293 | 1343 | 6.67380467196  |
| NM_004397    | DDX6  | 2239 | 2327 | 6.17298138063  |
| NM_004397    | DDX6  | 2072 | 2109 | 6.08884217124  |
| NM_004397    | DDX6  | 1989 | 2062 | 6.67380467196  |
| NM_004397    | DDX6  | 821  | 877  | 6.75392628117  |
| NM_004397    | DDX6  | 1155 | 1218 | 6.1729813804   |
| NM_004397    | DDX6  | 1585 | 1679 | 8.34290638207  |
| NM_004397    | DDX6  | 5527 | 5597 | 7.49490923959  |
| NM_004397    | DDX6  | 1030 | 1129 | 7.17298138063  |
| NM_004397    | DDX6  | 622  | 810  | 8.17298138063  |
| NM_004397    | DDX6  | 1713 | 1872 | 7.49490947551  |
| NM_004397    | DDX6  | 881  | 933  | 5.17280763031  |
| NM_004397    | DDX6  | 2573 | 2657 | 5.17298114471  |
| NM_004397    | DDX6  | 216  | 318  | 7.1729813804   |
| NM_004397    | DDX6  | 5285 | 5358 | 6.75793715029  |
| NM_004396    | DDX5  | 188  | 227  | 3.15545921112  |
| NM_004396    | DDX5  | 1594 | 1634 | 3.64088603851  |
| NM_004396    | DDX5  | 304  | 408  | 2.83353111646  |
| NM_004396    | DDX5  | 2065 | 2283 | 5.22584853924  |
| NM_004396    | DDX5  | 81   | 142  | 2.83353111646  |
| NM_004396    | DDX5  | 544  | 705  | 5.64088603851  |
| NM_004396    | DDX5  | 247  | 291  | 0.833357366138 |
| NM_004396    | DDX5  | 871  | 1146 | 6.25979587116  |
| NM_004396    | DDX5  | 1172 | 1354 | 5.0034561179   |
| NM_004396    | DDX5  | 1367 | 1571 | 4.74042171206  |
| NM_004396    | DDX5  | 1654 | 1992 | 5.83353111646  |
| NM_004396    | DDX5  | 741  | 865  | 3.41849361718  |
| NM_004395    | DBN1  | 655  | 723  | 7.03665417617  |
| NM_004395    | DBN1  | 106  | 188  | 6.45169167545  |
| NM_004395    | DBN1  | 232  | 274  | 5.4516849444   |
| NM_004395    | DBN1  | 2304 | 2411 | 8.77361977034  |

|              |        |      |      |               |
|--------------|--------|------|------|---------------|
| NM_004395    | DBN1   | 929  | 1002 | 5.36755246607 |
| NM_004395    | DBN1   | 356  | 403  | 6.4516849444  |
| NM_004395    | DBN1   | 1494 | 1564 | 7.03665417617 |
| NM_004395    | DBN1   | 2228 | 2302 | 5.45169167545 |
| NM_004395    | DBN1   | 2535 | 2642 | 7.03665417617 |
| NM_004394    | DAP    | 591  | 668  | 6.57731173829 |
| NM_004394    | DAP    | 1452 | 1498 | 3.99217548725 |
| NM_004394    | DAP    | 1527 | 1579 | 5.99234250652 |
| NM_004394    | DAP    | 351  | 400  | 4.9883316374  |
| NM_004394    | DAP    | 218  | 280  | 5.57731173829 |
| NM_004394    | DAP    | 1121 | 1180 | 4.9883316374  |
| NM_004394    | DAP    | 1627 | 1689 | 6.31427733246 |
| NM_004394    | DAP    | 704  | 754  | 5.57731173074 |
| NM_004394    | DAP    | 952  | 1027 | 4.99234923735 |
| NM_004394    | DAP    | 1284 | 1360 | 6.79970415963 |
| NM_004394    | DAP    | 1370 | 1444 | 5.57329413812 |
| NM_004394    | DAP    | 80   | 176  | 5.57731173074 |
| NM_004398    | DDX10  | 755  | 814  | 5.27763132101 |
| NM_004398    | DDX10  | 1554 | 1602 | 6.94672630006 |
| NM_000895    | LTA4H  | 1795 | 1878 | 2.41249504754 |
| NM_000895    | LTA4H  | 302  | 359  | 2.496634021   |
| NM_000895    | LTA4H  | 1879 | 1915 | 3.49261665675 |
| NM_000895    | LTA4H  | 1092 | 1285 | 5.95606587556 |
| NM_000895    | LTA4H  | 1580 | 1645 | 3.49662752587 |
| NM_000895    | LTA4H  | 769  | 918  | 5.08159675764 |
| NM_000895    | LTA4H  | 139  | 216  | 2.49663425692 |
| NM_000895    | LTA4H  | 979  | 1067 | 4.08159675764 |
| NM_000895    | LTA4H  | 387  | 431  | 2.49646050661 |
| NM_000895    | LTA4H  | 1988 | 2063 | 2.49261665675 |
| NM_000895    | LTA4H  | 1291 | 1550 | 6.95606587556 |
| NM_001164161 | PPP6R3 | 3612 | 3691 | 6.62361375239 |
| NM_001164161 | PPP6R3 | 112  | 157  | 7.10904057956 |
| NM_001164161 | PPP6R3 | 509  | 575  | 6.62361375239 |
| NM_001164161 | PPP6R3 | 1184 | 1238 | 6.88664815822 |
| NM_001164161 | PPP6R3 | 1934 | 2002 | 5.88664815822 |
| NM_001164161 | PPP6R3 | 2965 | 3078 | 7.10904057956 |
| NM_001164161 | PPP6R3 | 2858 | 2943 | 6.88664815822 |
| NM_001164161 | PPP6R3 | 916  | 990  | 6.30168565728 |
| NM_001164161 | PPP6R3 | 1481 | 1538 | 5.3016856575  |
| NM_001164161 | PPP6R3 | 1239 | 1308 | 5.30151190718 |
| NM_001164161 | PPP6R3 | 3549 | 3602 | 5.30168565728 |
| NM_001164161 | PPP6R3 | 1074 | 1143 | 5.88664815822 |
| NM_001164161 | PPP6R3 | 3167 | 3248 | 5.30168542158 |
| NM_001164161 | PPP6R3 | 1340 | 1403 | 5.3016856575  |
| NM_001164161 | PPP6R3 | 813  | 880  | 5.8866479223  |
| NM_001164161 | PPP6R3 | 3109 | 3147 | 4.21754644812 |
| NM_001164161 | PPP6R3 | 4896 | 4938 | 5.29766805733 |
| NM_001164161 | PPP6R3 | 4982 | 5026 | 5.8864744079  |
| NM_001164161 | PPP6R3 | 1837 | 1899 | 5.30168565728 |
| NM_001164161 | PPP6R3 | 4594 | 4676 | 7.3016856575  |

|              |        |      |      |               |
|--------------|--------|------|------|---------------|
| NM_001164161 | PPP6R3 | 4719 | 4799 | 5.886648158   |
| NM_001164161 | PPP6R3 | 1717 | 1837 | 7.10904057956 |
| NM_001164161 | PPP6R3 | 2162 | 2339 | 7.47161065894 |
| NM_001164161 | PPP6R3 | 321  | 397  | 6.62361375239 |
| NM_001164161 | PPP6R3 | 2014 | 2130 | 7.47161065894 |
| NM_001164161 | PPP6R3 | 2607 | 2716 | 6.3016856575  |
| NM_001164161 | PPP6R3 | 4170 | 4314 | 5.88664815822 |
| NM_001164161 | PPP6R3 | 2721 | 2805 | 6.3016856575  |
| NM_001164161 | PPP6R3 | 1543 | 1685 | 6.62361375239 |
| NM_001164161 | PPP6R3 | 4331 | 4463 | 6.3016856575  |
| NM_001164161 | PPP6R3 | 3937 | 4052 | 6.62361375239 |
| NM_001164161 | PPP6R3 | 636  | 813  | 8.47161065894 |
| NM_001164161 | PPP6R3 | 2349 | 2552 | 7.88664815822 |
| NM_024116    | TAF1D  | 1038 | 1093 | 1.87394559752 |
| NM_024116    | TAF1D  | 783  | 873  | 1.87796319769 |
| NM_024116    | TAF1D  | 244  | 350  | 4.87796319769 |
| NM_024116    | TAF1D  | 941  | 1018 | 3.87796319769 |
| NM_007372    | DDX42  | 1041 | 1107 | 3.9830703511  |
| NM_007372    | DDX42  | 1534 | 1609 | 4.56803958287 |
| NM_007372    | DDX42  | 3529 | 3595 | 3.9830770746  |
| NM_007372    | DDX42  | 949  | 1012 | 3.98307708215 |
| NM_007372    | DDX42  | 2274 | 2387 | 4.56803958287 |
| NM_007372    | DDX42  | 1109 | 1162 | 2.97905948198 |
| NM_007372    | DDX42  | 1258 | 1296 | 2.89893787277 |
| NM_007372    | DDX42  | 454  | 500  | 2.89893787277 |
| NM_007372    | DDX42  | 3489 | 3517 | 2.89893787277 |
| NM_007372    | DDX42  | 1656 | 1765 | 3.98307708215 |
| NM_007372    | DDX42  | 539  | 707  | 4.56803958287 |
| NM_007373    | SHOC2  | 247  | 293  | 6.63925530706 |
| NM_007373    | SHOC2  | 3167 | 3195 | 6.55913369785 |
| NM_007373    | SHOC2  | 1503 | 1656 | 9.22823540795 |
| NM_000898    | MAOB   | 2356 | 2410 | 6.16288640648 |
| NM_000898    | MAOB   | 609  | 668  | 6.16271265616 |
| NM_000898    | MAOB   | 854  | 881  | 6.0787471971  |
| NM_000898    | MAOB   | 2436 | 2493 | 6.0787471971  |
| NM_130791    | WVOX   | 539  | 589  | 5.40739018854 |
| NM_001083893 | STRN3  | 2204 | 2255 | 3.42088863796 |
| NM_001083893 | STRN3  | 1674 | 1719 | 5.50485409703 |
| NM_001083893 | STRN3  | 1049 | 1124 | 4.50485409703 |
| NM_001083893 | STRN3  | 1496 | 1546 | 5.08998361702 |
| NM_024805    | RBFA   | 737  | 817  | 6.85618945821 |
| NM_024809    | TCTN2  | 902  | 961  | 7.49858450423 |
| NM_024809    | TCTN2  | 1564 | 1613 | 9.50242835408 |
| NM_024809    | TCTN2  | 1702 | 1756 | 8.49858450423 |
| NM_024809    | TCTN2  | 1499 | 1555 | 9.49858450423 |
| NM_024809    | TCTN2  | 1404 | 1471 | 9.00342539574 |
| NM_024808    | BORA   | 581  | 625  | 9.49746396433 |
| NM_003270    | TSPAN6 | 1571 | 1625 | 5.686543723   |
| NM_003270    | TSPAN6 | 1819 | 1875 | 5.2715062235  |
| NM_003270    | TSPAN6 | 1716 | 1774 | 6.00847181789 |

|              |          |      |      |               |               |
|--------------|----------|------|------|---------------|---------------|
| NM_003270    | TSPAN6   | 139  | 343  | 8.00847181789 |               |
| NM_003270    | TSPAN6   | 345  | 876  | 9.6638236465  |               |
| NM_003270    | TSPAN6   | 881  | 1144 | 8.27150622373 |               |
| NM_003270    | TSPAN6   | 1152 | 1479 | 8.07886114578 |               |
| NM_003273    | TM7SF2   | 84   | 164  | 8.41794295362 |               |
| NM_003273    | TM7SF2   | 628  | 770  | 9.64033537495 |               |
| NM_003273    | TM7SF2   | 1050 | 1147 | 7.8329804529  |               |
| NM_003273    | TM7SF2   | 1447 | 1522 | 5.82896285272 |               |
| NM_001102594 | DTX2     | 1962 | 2018 | 8.64594604199 |               |
| NM_001102594 | DTX2     | 163  | 210  | 9.6459527655  |               |
| NM_001102594 | DTX2     | 216  | 334  | 11.4533076951 |               |
| NM_001102594 | DTX2     | 1141 | 1210 | 8.64193517287 |               |
| NM_003274    | TRAPPC10 |      | 3458 | 3497          | 8.61405111707 |
| NM_003274    | TRAPPC10 |      | 3083 | 3137          | 8.61806198619 |
| NM_003274    | TRAPPC10 |      | 625  | 720           | 9.61806871724 |
| NM_003274    | TRAPPC10 |      | 3242 | 3320          | 9.20303121796 |
| NM_003274    | TRAPPC10 |      | 1579 | 1642          | 7.61405111707 |
| NM_003274    | TRAPPC10 |      | 5677 | 5769          | 7.61806871702 |
| NM_003274    | TRAPPC10 |      | 205  | 259           | 8.61806198619 |
| NM_003274    | TRAPPC10 |      | 6643 | 6679          | 7.61789496692 |
| NM_003274    | TRAPPC10 |      | 4543 | 4626          | 7.61405111707 |
| NM_003274    | TRAPPC10 |      | 1352 | 1439          | 9.20303121041 |
| NM_003274    | TRAPPC10 |      | 3498 | 3547          | 7.61405111707 |
| NM_003274    | TRAPPC10 |      | 4863 | 4916          | 8.61789496692 |
| NM_003274    | TRAPPC10 |      | 857  | 928           | 8.61806848132 |
| NM_003274    | TRAPPC10 |      | 4769 | 4830          | 7.61405111707 |
| NM_003274    | TRAPPC10 |      | 490  | 563           | 9.20285746764 |
| NM_003276    | TMPO     | 3511 | 3592 | 6.52582884832 |               |
| NM_003276    | TMPO     | 3059 | 3125 | 7.74822126943 |               |
| NM_003276    | TMPO     | 968  | 1016 | 4.93684874742 |               |
| NM_003276    | TMPO     | 1257 | 1328 | 6.52582884832 |               |
| NM_003276    | TMPO     | 393  | 439  | 6.94085961654 |               |
| NM_003276    | TMPO     | 2352 | 2441 | 7.26279444248 |               |
| NM_003276    | TMPO     | 75   | 151  | 8.40029796623 |               |
| NM_003276    | TMPO     | 2520 | 2592 | 6.94086634759 |               |
| NM_003276    | TMPO     | 1164 | 1239 | 6.94086634759 |               |
| NM_003276    | TMPO     | 1890 | 1950 | 5.94086634759 |               |
| NM_003276    | TMPO     | 1070 | 1138 | 6.52582884831 |               |
| NM_003276    | TMPO     | 1332 | 1423 | 4.94086634759 |               |
| NM_003276    | TMPO     | 1969 | 2073 | 7.94086634759 |               |
| NM_003276    | TMPO     | 2291 | 2351 | 5.94086611168 |               |
| NM_003276    | TMPO     | 281  | 388  | 7.94086634759 |               |
| NM_003276    | TMPO     | 894  | 952  | 6.94086611168 |               |
| NM_003276    | TMPO     | 805  | 882  | 7.52582884832 |               |
| NM_003276    | TMPO     | 1426 | 1513 | 7.52582884832 |               |
| NM_003276    | TMPO     | 543  | 784  | 8.94086634759 |               |
| NM_003276    | TMPO     | 1519 | 1788 | 9.18879386104 |               |
| NM_003276    | TMPO     | 2175 | 2280 | 6.94086634759 |               |
| NM_203387    | RNH1     | 812  | 879  | 6.77693898197 |               |
| NM_203387    | RNH1     | 1468 | 1502 | 5.10783727186 |               |

|              |         |      |      |               |
|--------------|---------|------|------|---------------|
| NM_203387    | RNH1    | 638  | 726  | 5.19197648125 |
| NM_203387    | RNH1    | 1530 | 1584 | 6.77693898197 |
| NM_203387    | RNH1    | 1796 | 1867 | 6.19197648125 |
| NM_203387    | RNH1    | 1302 | 1357 | 6.19197624533 |
| NM_203387    | RNH1    | 1693 | 1793 | 6.77693898197 |
| NM_203387    | RNH1    | 520  | 622  | 7.19197648125 |
| NM_203387    | RNH1    | 1898 | 1977 | 6.19197648124 |
| NM_203387    | RNH1    | 904  | 1103 | 7.77693898197 |
| NM_203387    | RNH1    | 1140 | 1290 | 7.9993314033  |
| NM_001114106 | SLC44A3 | 377  | 436  | 9.31915746504 |
| NM_001114106 | SLC44A3 | 1884 | 1932 | 9.31915770096 |
| NM_001114106 | SLC44A3 | 685  | 777  | 9.31915770096 |
| NM_001114106 | SLC44A3 | 202  | 242  | 9.31915769341 |
| NM_001114106 | SLC44A3 | 1998 | 2065 | 7.73419520024 |
| NM_001114106 | SLC44A3 | 1851 | 1881 | 8.73418846919 |
| NM_001114106 | SLC44A3 | 845  | 978  | 10.9041202017 |
| NM_001114106 | SLC44A3 | 992  | 1061 | 9.31915770096 |
| NM_001114106 | SLC44A3 | 1226 | 1300 | 10.0561232951 |
| NM_001114106 | SLC44A3 | 1085 | 1193 | 10.7341952002 |
| NM_001114106 | SLC44A3 | 590  | 665  | 8.65005599086 |
| NM_001114106 | SLC44A3 | 1722 | 1830 | 8.73419520024 |
| NM_001114106 | SLC44A3 | 1352 | 1507 | 9.73419520024 |
| NM_001114106 | SLC44A3 | 243  | 368  | 10.0561232951 |
| NM_004978    | KCNC4   | 2570 | 2598 | 10.997691249  |
| NM_004978    | KCNC4   | 3356 | 3427 | 9.99367365636 |
| NM_004978    | KCNC4   | 779  | 863  | 10.9976845255 |
| NM_001017405 | MAEA    | 1697 | 1736 | 4.02715538917 |
| NM_001017405 | MAEA    | 11   | 78   | 5.60827404003 |
| NM_001017405 | MAEA    | 797  | 852  | 4.02732890357 |
| NM_001017405 | MAEA    | 279  | 349  | 4.02331153931 |
| NM_001017405 | MAEA    | 1297 | 1371 | 4.02732890357 |
| NM_001017405 | MAEA    | 1016 | 1195 | 7.02732913949 |
| NM_001017405 | MAEA    | 1570 | 1652 | 6.02732913949 |
| NM_001017405 | MAEA    | 79   | 268  | 5.61229164021 |
| NM_001017405 | MAEA    | 1378 | 1537 | 7.02732913949 |
| NM_001017405 | MAEA    | 1836 | 2103 | 7.34925723437 |
| NM_001017405 | MAEA    | 633  | 748  | 6.02732913949 |
| NM_001199772 | PSMA5   | 443  | 598  | 7.59770139412 |
| NM_001199772 | PSMA5   | 694  | 790  | 6.86073579995 |
| NM_001199772 | PSMA5   | 114  | 270  | 8.73520491787 |
| NM_001199772 | PSMA5   | 272  | 408  | 7.59770139412 |
| NM_001014812 | FAM96A  | 178  | 263  | 4.87553556504 |
| NM_001014812 | FAM96A  | 824  | 913  | 5.46049807309 |
| NM_001014812 | FAM96A  | 407  | 482  | 5.87553557259 |
| NM_001014812 | FAM96A  | 642  | 692  | 4.79139636321 |
| NM_001014812 | FAM96A  | 350  | 401  | 4.87553557259 |
| NM_001014812 | FAM96A  | 926  | 984  | 3.87553556504 |
| NM_001014812 | FAM96A  | 695  | 786  | 5.46049807331 |
| NM_006026    | H1FX    | 640  | 665  | 3.693185039   |
| NM_006026    | H1FX    | 1079 | 1119 | 3.77330664821 |

|              |               |      |      |                   |
|--------------|---------------|------|------|-------------------|
| NM_006026    | H1FX          | 373  | 428  | 3.77330664821     |
| NM_006026    | H1FX          | 71   | 172  | 5.3622867491      |
| NM_003017    | SRSF3         | 1243 | 1311 | 3.4250878698      |
| NM_003017    | SRSF3         | 1312 | 1394 | 5.23244279185     |
| NM_003017    | SRSF3         | 1394 | 1444 | 3.42508113874     |
| NM_003017    | SRSF3         | 54   | 471  | 8.01005037052     |
| NM_003017    | SRSF3         | 707  | 870  | 6.33197846541     |
| NM_003017    | SRSF3         | 473  | 697  | 5.74701596468     |
| NM_003017    | SRSF3         | 871  | 972  | 5.01005037052     |
| NM_003016    | SRSF2         | 1540 | 1590 | 3.9738131703      |
| NM_003016    | SRSF2         | 2689 | 2751 | 3.97398018956     |
| NM_003016    | SRSF2         | 2021 | 2064 | 6.29590828445     |
| NM_003016    | SRSF2         | 1907 | 1964 | 3.97398692062     |
| NM_003016    | SRSF2         | 435  | 510  | 4.97398692062     |
| NM_003016    | SRSF2         | 1861 | 1907 | 4.97398018956     |
| NM_003016    | SRSF2         | 1970 | 2010 | 5.55894942134     |
| NM_003016    | SRSF2         | 1070 | 1119 | 4.96996932044     |
| NM_003016    | SRSF2         | 2552 | 2667 | 7.2959150155      |
| NM_003016    | SRSF2         | 2760 | 2946 | 8.06144976187     |
| NM_003016    | SRSF2         | 2114 | 2279 | 8.06144976187     |
| NM_003016    | SRSF2         | 655  | 892  | 7.97398692062     |
| NM_003016    | SRSF2         | 2364 | 2468 | 4.9739866847      |
| NM_003016    | SRSF2         | 240  | 381  | 6.55894942134     |
| NM_006023    | CDC123        | 608  | 680  | 5.19504533252     |
| NM_006023    | CDC123        | 1188 | 1245 | 5.77599023307     |
| NM_006023    | CDC123        | 957  | 1036 | 5.7800078257      |
| NM_006023    | CDC123        | 693  | 831  | 8.65447695116     |
| NM_006023    | CDC123        | 1421 | 1477 | 5.19504509661     |
| NM_006023    | CDC123        | 457  | 553  | 5.78000783325     |
| NM_006023    | CDC123        | 1485 | 1535 | 4.19503860147     |
| NM_006023    | CDC123        | 1071 | 1135 | 6.51697342741     |
| NM_006023    | CDC123        | 854  | 912  | 4.19487158221     |
| NM_006023    | CDC123        | 378  | 442  | 6.51697342741     |
| NM_001202548 | SYNJ2BP-COX16 |      | 639  | 760 8.93559980535 |
| NM_001202548 | SYNJ2BP-COX16 |      | 423  | 639 10.0731033291 |
| NM_020943    | CWC22         | 1301 | 1354 | 5.17518528066     |
| NM_020943    | CWC22         | 1656 | 1791 | 6.25932449004     |
| NM_004656    | BAP1          | 2215 | 2277 | 6.84834485932     |
| NM_004656    | BAP1          | 400  | 470  | 7.43732495266     |
| NM_004656    | BAP1          | 3123 | 3164 | 5.76822325011     |
| NM_004656    | BAP1          | 1404 | 1461 | 5.84834485932     |
| NM_004656    | BAP1          | 572  | 639  | 6.85218870917     |
| NM_006029    | PNMA1         | 625  | 693  | 6.62824238202     |
| NM_006029    | PNMA1         | 151  | 231  | 8.2132116138      |
| NM_006029    | PNMA1         | 1577 | 1676 | 6.62824911286     |
| NM_006029    | PNMA1         | 750  | 809  | 8.95017720796     |
| NM_006029    | PNMA1         | 273  | 341  | 6.54410990369     |
| NM_006029    | PNMA1         | 825  | 921  | 7.62824911286     |
| NM_001127228 | CBX1          | 1110 | 1155 | 5.95534886895     |
| NM_001127228 | CBX1          | 2113 | 2182 | 6.54031160559     |

|              |              |      |      |               |               |
|--------------|--------------|------|------|---------------|---------------|
| NM_001127228 | CBX1         | 1428 | 1479 | 4.87120989549 |               |
| NM_021825    | CCDC90B      | 3394 | 3420 | 2.99629371444 |               |
| NM_001204871 | URGCP-MRPS24 | 375  | 464  | 9.89067905885 |               |
| NM_001204871 | URGCP-MRPS24 | 232  | 266  | 7.88666145868 |               |
| NM_001204871 | URGCP-MRPS24 | 488  | 577  | 8.89067905885 |               |
| NM_001204871 | URGCP-MRPS24 | 110  | 227  | 9.47564155957 |               |
| NM_001204871 | URGCP-MRPS24 | 581  | 822  | 12.748660054  |               |
| NM_001079804 | GAA          | 506  | 562  | 6.25946423443 |               |
| NM_001079804 | GAA          | 3104 | 3147 | 7.25929048411 |               |
| NM_001079804 | GAA          | 567  | 642  | 8.25946423443 |               |
| NM_001079804 | GAA          | 2643 | 2715 | 6.25946423443 |               |
| NM_001079804 | GAA          | 3327 | 3374 | 6.25929048411 |               |
| NM_001079804 | GAA          | 1411 | 1466 | 7.84442673493 |               |
| NM_001079804 | GAA          | 2386 | 2436 | 7.25946423443 |               |
| NM_001079804 | GAA          | 1147 | 1195 | 7.25946423443 |               |
| NM_001079804 | GAA          | 2282 | 2353 | 8.25946423443 |               |
| NM_001079804 | GAA          | 701  | 809  | 7.25946423443 |               |
| NM_001079804 | GAA          | 817  | 905  | 8.58139232932 |               |
| NM_001079804 | GAA          | 911  | 952  | 7.25946423421 |               |
| NM_001079804 | GAA          | 2057 | 2085 | 7.25945750338 |               |
| NM_001079804 | GAA          | 151  | 216  | 6.25946423443 |               |
| NM_001079804 | GAA          | 1002 | 1114 | 8.84442673515 |               |
| NM_001079804 | GAA          | 2770 | 2844 | 7.25946399851 |               |
| NM_001079804 | GAA          | 1269 | 1353 | 7.25946423421 |               |
| NM_001079804 | GAA          | 2888 | 2984 | 7.84442673515 |               |
| NM_001079804 | GAA          | 2536 | 2595 | 6.17532502505 |               |
| NM_001079804 | GAA          | 3155 | 3286 | 8.84442673515 |               |
| NM_001079804 | GAA          | 3033 | 3083 | 7.17532502505 |               |
| NM_001079804 | GAA          | 1552 | 1728 | 8.58139232932 |               |
| NM_001079804 | GAA          | 1883 | 1969 | 8.5813920934  |               |
| NM_001079809 | TMEM183B     |      | 503  | 585           | 7.57736653729 |
| NM_001079809 | TMEM183B     |      | 657  | 691           | 5.57335566817 |
| NM_001079809 | TMEM183B     |      | 958  | 1058          | 7.16233553315 |
| NM_001079809 | TMEM183B     |      | 1219 | 1330          | 6.57737326834 |
| NM_001079809 | TMEM183B     |      | 776  | 830           | 6.57719951803 |
| NM_032116    | KATNAL1      | 3884 | 3962 | 8.16473246564 |               |
| NM_032447    | FBN3         | 2049 | 2095 | 13.3343862426 |               |
| NM_032447    | FBN3         | 4835 | 4881 | 13.3303753735 |               |
| NM_032448    | FAM120B      | 2022 | 2067 | 6.18589680922 |               |
| NM_032448    | FAM120B      | 853  | 921  | 7.18991417347 |               |
| NM_032448    | FAM120B      | 3116 | 3161 | 6.77085930994 |               |
| NM_032449    | CC2D1B       | 3147 | 3199 | 8.39407840463 |               |
| NM_032449    | CC2D1B       | 3518 | 3567 | 7.31395679542 |               |
| NM_032449    | CC2D1B       | 2322 | 2373 | 7.39792225448 |               |
| NM_032449    | CC2D1B       | 233  | 308  | 8.39809576888 |               |
| NM_032119    | GPR98        | 1431 | 1467 | 14.3042089963 |               |
| NM_032119    | GPR98        | 1372 | 1431 | 14.2240873871 |               |
| NM_032119    | GPR98        | 465  | 502  | 16.3042089963 |               |
| NM_032119    | GPR98        | 5318 | 5392 | 15.2240873871 |               |
| NM_032119    | GPR98        | 2193 | 2240 | 14.3080528461 |               |

|           |         |      |      |               |
|-----------|---------|------|------|---------------|
| NM_006521 | TFE3    | 1136 | 1176 | 5.99265590045 |
| NM_006521 | TFE3    | 734  | 773  | 6.99649975031 |
| NM_006521 | TFE3    | 2509 | 2557 | 5.99667349307 |
| NM_018198 | DNAJC11 | 811  | 864  | 5.35865469181 |
| NM_018198 | DNAJC11 | 1330 | 1373 | 6.35464382269 |
| NM_018198 | DNAJC11 | 1037 | 1108 | 6.35866141531 |
| NM_018198 | DNAJC11 | 866  | 921  | 5.27452221348 |
| NM_018198 | DNAJC11 | 3066 | 3177 | 5.35866118694 |
| NM_018191 | RCBTB1  | 1900 | 1956 | 6.98103773454 |
| NM_018193 | FANCI   | 68   | 123  | 7.64888690174 |
| NM_018193 | FANCI   | 1023 | 1068 | 7.06391790589 |
| NM_018193 | FANCI   | 4274 | 4356 | 6.06391790589 |
| NM_018193 | FANCI   | 2364 | 2409 | 6.97978542756 |
| NM_018193 | FANCI   | 924  | 955  | 5.97978542756 |
| NM_018193 | FANCI   | 2206 | 2272 | 7.64888690174 |
| NM_018193 | FANCI   | 4360 | 4443 | 6.05990703677 |
| NM_018193 | FANCI   | 3370 | 3413 | 7.06391790589 |
| NM_018193 | FANCI   | 3507 | 3610 | 6.06392440102 |
| NM_018193 | FANCI   | 1349 | 1508 | 8.64888713766 |
| NM_018193 | FANCI   | 1916 | 2098 | 7.06392463694 |
| NM_018193 | FANCI   | 3194 | 3258 | 6.06392463672 |
| NM_002636 | PHF1    | 494  | 570  | 8.6048548011  |
| NM_002636 | PHF1    | 1626 | 1682 | 6.60485456518 |
| NM_002636 | PHF1    | 967  | 1044 | 8.92678289599 |
| NM_002636 | PHF1    | 745  | 823  | 8.18981730182 |
| NM_002636 | PHF1    | 393  | 469  | 8.18981730182 |
| NM_002636 | PHF1    | 274  | 333  | 6.6048548011  |
| NM_002636 | PHF1    | 333  | 382  | 8.18981730182 |
| NM_002636 | PHF1    | 1071 | 1108 | 7.52071559172 |
| NM_002636 | PHF1    | 873  | 945  | 7.60485480088 |
| NM_002636 | PHF1    | 1862 | 1918 | 8.18981730182 |
| NM_002634 | PHB     | 1005 | 1041 | 4.55617410242 |
| NM_002634 | PHB     | 1044 | 1101 | 5.36353575553 |
| NM_002634 | PHB     | 42   | 86   | 4.05700412481 |
| NM_002634 | PHB     | 1421 | 1540 | 5.14114333419 |
| NM_002634 | PHB     | 1683 | 1772 | 3.55618083347 |
| NM_002634 | PHB     | 122  | 626  | 8.01561245211 |
| NM_002634 | PHB     | 926  | 1001 | 3.55618083347 |
| NM_002634 | PHB     | 646  | 891  | 6.25662055161 |
| NM_002633 | PGM1    | 1526 | 1570 | 4.37048347405 |
| NM_002633 | PGM1    | 945  | 999  | 3.37031645478 |
| NM_002633 | PGM1    | 1049 | 1144 | 4.9554527056  |
| NM_002630 | PGC     | 4    | 645  | 10.4048498587 |
| NM_002630 | PGC     | 745  | 1358 | 10.8266765236 |
| NM_002631 | PGD     | 1833 | 1935 | 5.7330692127  |
| NM_002631 | PGD     | 1191 | 1338 | 7.39603422543 |
| NM_002631 | PGD     | 1035 | 1094 | 4.7330692127  |
| NM_002631 | PGD     | 644  | 810  | 6.31803171343 |
| NM_002631 | PGD     | 39   | 238  | 7.67166866804 |
| NM_002631 | PGD     | 1124 | 1159 | 3.14793296167 |



|           |        |      |      |               |
|-----------|--------|------|------|---------------|
| NM_002631 | PGD    | 1685 | 1779 | 5.14810671198 |
| NM_002631 | PGD    | 550  | 626  | 5.14810671198 |
| NM_002631 | PGD    | 876  | 1000 | 6.31803171343 |
| NM_002631 | PGD    | 1345 | 1488 | 6.7330692127  |
| NM_002631 | PGD    | 1488 | 1684 | 6.60753833062 |
| NM_002631 | PGD    | 306  | 453  | 6.95546163404 |
| NM_013410 | AK4    | 2044 | 2103 | 4.47954382878 |
| NM_013410 | AK4    | 453  | 490  | 5.06433257941 |
| NM_013410 | AK4    | 1622 | 1724 | 6.06450632972 |
| NM_013410 | AK4    | 6687 | 6777 | 5.80147192389 |
| NM_013410 | AK4    | 501  | 600  | 6.28689875106 |
| NM_013410 | AK4    | 1019 | 1070 | 4.47552622883 |
| NM_013410 | AK4    | 1222 | 1332 | 5.06450632972 |
| NM_013410 | AK4    | 682  | 737  | 4.39540461962 |
| NM_013412 | RABL2A | 1400 | 1484 | 7.61577606287 |
| NM_013412 | RABL2A | 1953 | 2031 | 7.61175869862 |
| NM_013412 | RABL2A | 1565 | 1599 | 7.61577629857 |
| NM_014292 | CBX6   | 1147 | 1201 | 12.0522958822 |
| NM_014292 | CBX6   | 1985 | 2057 | 12.6334145331 |
| NM_014292 | CBX6   | 861  | 999  | 11.0524696326 |
| NM_014292 | CBX6   | 3134 | 3206 | 12.0524693966 |
| NM_014292 | CBX6   | 233  | 261  | 10.9683304232 |
| NM_014292 | CBX6   | 1834 | 1898 | 11.0522958822 |
| NM_014292 | CBX6   | 1540 | 1671 | 13.0524696326 |
| NM_014292 | CBX6   | 35   | 99   | 12.6334145331 |
| NM_014292 | CBX6   | 2058 | 2169 | 12.6374321257 |
| NM_014290 | TDRD7  | 2275 | 2378 | 7.71028705835 |
| NM_014290 | TDRD7  | 2059 | 2101 | 6.62614784897 |
| NM_014297 | ETHE1  | 587  | 656  | 4.81367106129 |
| NM_014296 | CAPN7  | 2430 | 2492 | 5.80310519157 |
| NM_014296 | CAPN7  | 502  | 556  | 6.79909432245 |
| NM_014296 | CAPN7  | 2766 | 2875 | 6.80311192262 |
| NM_014294 | TRAM1  | 2373 | 2439 | 6.21822015321 |
| NM_014294 | TRAM1  | 1795 | 1949 | 8.21822016076 |
| NM_014294 | TRAM1  | 2194 | 2317 | 5.21822016076 |
| NM_014294 | TRAM1  | 2659 | 2854 | 9.12511075637 |
| NM_014294 | TRAM1  | 284  | 1599 | 13.2789160924 |
| NM_014294 | TRAM1  | 2064 | 2151 | 7.21822016075 |
| NM_014294 | TRAM1  | 1608 | 1752 | 6.80318266148 |
| NM_014298 | QPRT   | 1006 | 1036 | 5.75846025051 |
| NM_014298 | QPRT   | 204  | 248  | 5.7584600146  |
| NM_014298 | QPRT   | 779  | 913  | 7.56581517257 |
| NM_014298 | QPRT   | 265  | 334  | 4.75846025051 |
| NM_014298 | QPRT   | 57   | 180  | 6.75846025051 |
| NM_014298 | QPRT   | 1066 | 1219 | 8.45889996866 |
| NM_014298 | QPRT   | 444  | 710  | 8.34342275124 |
| NM_018994 | FBX042 | 1072 | 1149 | 9.08527188359 |
| NM_015475 | FAM98A | 737  | 799  | 6.90981260686 |
| NM_015475 | FAM98A | 2224 | 2284 | 5.90981237095 |
| NM_015475 | FAM98A | 65   | 157  | 7.49477487167 |

|              |           |      |      |                    |
|--------------|-----------|------|------|--------------------|
| NM_015475    | FAM98A    | 390  | 460  | 6.90980587581      |
| NM_015476    | C18orf10  |      | 932  | 994 8.43645233069  |
| NM_015476    | C18orf10  |      | 757  | 823 8.43645233069  |
| NM_015476    | C18orf10  |      | 567  | 680 9.85149656102  |
| NM_018997    | MRPS21    | 176  | 248  | 2.55831380454      |
| NM_018997    | MRPS21    | 616  | 656  | 3.55832052804      |
| NM_018997    | MRPS21    | 518  | 598  | 4.88024863048      |
| NM_018997    | MRPS21    | 676  | 750  | 4.14328303631      |
| NM_018997    | MRPS21    | 839  | 913  | 4.14328303631      |
| NM_018997    | MRPS21    | 360  | 507  | 4.88024863048      |
| NM_015470    | RAB11FIP5 |      | 3577 | 3672 8.36554387539 |
| NM_015470    | RAB11FIP5 |      | 2447 | 2520 8.28141139706 |
| NM_015470    | RAB11FIP5 |      | 2919 | 2967 8.36153300627 |
| NM_015470    | RAB11FIP5 |      | 2829 | 2878 7.36554387539 |
| NM_018992    | KCTD5     | 1854 | 1902 | 5.21172023877      |
| NM_018992    | KCTD5     | 325  | 393  | 5.7966827395       |
| NM_018992    | KCTD5     | 1747 | 1829 | 4.21573783894      |
| NM_018992    | KCTD5     | 1979 | 2052 | 5.21573110789      |
| NM_018992    | KCTD5     | 1634 | 1722 | 5.21556408863      |
| NM_015473    | HEATR5A   | 308  | 354  | 7.27972803203      |
| NM_015473    | HEATR5A   | 117  | 203  | 7.28373890115      |
| NM_015473    | HEATR5A   | 1556 | 1600 | 7.27972803203      |
| NM_015473    | HEATR5A   | 5079 | 5148 | 7.28357188188      |
| NM_015473    | HEATR5A   | 3050 | 3164 | 9.60567372709      |
| NM_015473    | HEATR5A   | 743  | 916  | 10.2837456322      |
| NM_018998    | FBXW5     | 804  | 862  | 7.24795913312      |
| NM_018998    | FBXW5     | 870  | 910  | 5.66700750152      |
| NM_018998    | FBXW5     | 1347 | 1420 | 5.66701423257      |
| NM_018998    | FBXW5     | 672  | 796  | 7.2519767333       |
| NM_018998    | FBXW5     | 498  | 573  | 5.66701422502      |
| NM_018998    | FBXW5     | 1484 | 1605 | 7.66701423257      |
| NM_001170416 | TJP2      | 3119 | 3181 | 5.17920251556      |
| NM_001170416 | TJP2      | 494  | 593  | 5.17920251556      |
| NM_001170416 | TJP2      | 4200 | 4256 | 6.17920251556      |
| NM_001170416 | TJP2      | 4275 | 4339 | 5.59424001462      |
| NM_001170416 | TJP2      | 825  | 890  | 5.17920251556      |
| NM_001170416 | TJP2      | 4102 | 4142 | 3.51010080546      |
| NM_001170416 | TJP2      | 376  | 429  | 3.59423328379      |
| NM_001170416 | TJP2      | 1135 | 1222 | 6.17920251556      |
| NM_001170416 | TJP2      | 3749 | 3792 | 4.51010080546      |
| NM_001170416 | TJP2      | 3988 | 4096 | 5.91616810973      |
| NM_001170416 | TJP2      | 3800 | 3980 | 6.59424001484      |
| NM_001170416 | TJP2      | 2460 | 2516 | 6.17920251556      |
| NM_001170416 | TJP2      | 1839 | 1901 | 3.59022241467      |
| NM_001170416 | TJP2      | 2996 | 3045 | 3.51010080546      |
| NM_001170416 | TJP2      | 2331 | 2414 | 5.17920251534      |
| NM_001170416 | TJP2      | 2249 | 2306 | 3.59423977892      |
| NM_001170416 | TJP2      | 1982 | 2106 | 5.17920251556      |
| NM_001170416 | TJP2      | 156  | 337  | 6.59424001484      |
| NM_001170416 | TJP2      | 2734 | 2908 | 6.17920251556      |

|              |         |      |      |               |
|--------------|---------|------|------|---------------|
| NM_001170416 | TJP2    | 1645 | 1769 | 3.59424001484 |
| NM_001170416 | TJP2    | 3538 | 3725 | 6.4015949369  |
| NM_001170416 | TJP2    | 2108 | 2216 | 4.59424001484 |
| NM_033247    | PML     | 1409 | 1474 | 10.3897342648 |
| NM_033247    | PML     | 686  | 723  | 8.72465015486 |
| NM_021978    | ST14    | 1248 | 1321 | 12.3109924914 |
| NM_021978    | ST14    | 1585 | 1644 | 11.3109924914 |
| NM_021978    | ST14    | 157  | 223  | 11.3109924838 |
| NM_021978    | ST14    | 2492 | 2554 | 11.3109924914 |
| NM_021978    | ST14    | 587  | 625  | 9.64189078128 |
| NM_021978    | ST14    | 640  | 693  | 10.7260299831 |
| NM_021978    | ST14    | 1821 | 1867 | 10.7260299831 |
| NM_021978    | ST14    | 2951 | 3005 | 11.3109924912 |
| NM_021978    | ST14    | 2554 | 2600 | 10.7260297547 |
| NM_021978    | ST14    | 1078 | 1180 | 12.5333849127 |
| NM_021978    | ST14    | 464  | 584  | 13.4264697088 |
| NM_021978    | ST14    | 33   | 86   | 9.64189078128 |
| NM_021978    | ST14    | 1414 | 1561 | 11.7260299907 |
| NM_021978    | ST14    | 231  | 310  | 12.5333849127 |
| NM_021978    | ST14    | 2623 | 2771 | 12.7260299907 |
| NM_021978    | ST14    | 1348 | 1411 | 9.72602999044 |
| NM_021978    | ST14    | 2818 | 2936 | 12.3109924914 |
| NM_021978    | ST14    | 1645 | 1762 | 11.3109924914 |
| NM_021978    | ST14    | 2244 | 2488 | 13.4264697088 |
| NM_021978    | ST14    | 314  | 412  | 11.3109924914 |
| NM_021978    | ST14    | 3180 | 3268 | 10.7260299907 |
| NM_021978    | ST14    | 782  | 1064 | 12.8959549921 |
| NM_021978    | ST14    | 1874 | 2239 | 13.6329205863 |
| NM_152289    | ZNF561  | 324  | 450  | 8.46260765494 |
| NM_152288    | ORAI3   | 518  | 586  | 10.4781811729 |
| NM_152288    | ORAI3   | 1725 | 1789 | 10.4783481922 |
| NM_152288    | ORAI3   | 827  | 881  | 8.80925321314 |
| NM_152285    | ARRDC1  | 846  | 905  | 6.5231265375  |
| NM_021970    | LAMTOR3 | 168  | 200  | 7.56335737873 |
| NM_021970    | LAMTOR3 | 604  | 649  | 7.56335737873 |
| NM_021970    | LAMTOR3 | 312  | 357  | 7.56335737873 |
| NM_021970    | LAMTOR3 | 2176 | 2238 | 7.64749635219 |
| NM_021971    | GMPPB   | 524  | 586  | 8.78776948172 |
| NM_152281    | GORAB   | 894  | 976  | 7.18152216511 |
| NM_152280    | SYT11   | 1873 | 1920 | 11.8503584099 |
| NM_152280    | SYT11   | 1968 | 2025 | 11.854369279  |
| NM_152280    | SYT11   | 742  | 808  | 12.4393382749 |
| NM_152280    | SYT11   | 507  | 599  | 10.8543760101 |
| NM_152280    | SYT11   | 367  | 417  | 12.8543760025 |
| NM_152280    | SYT11   | 1780 | 1868 | 12.4393385108 |
| NM_152280    | SYT11   | 1243 | 1328 | 12.4391647605 |
| NM_152280    | SYT11   | 4270 | 4344 | 12.4393385108 |
| NM_152280    | SYT11   | 2317 | 2377 | 12.4391647605 |
| NM_152280    | SYT11   | 1345 | 1425 | 14.176304105  |
| NM_152280    | SYT11   | 260  | 359  | 13.176304105  |

|              |          |      |      |                    |
|--------------|----------|------|------|--------------------|
| NM_152280    | SYT11    | 931  | 1084 | 13.176304105       |
| NM_152280    | SYT11    | 630  | 712  | 11.8543760099      |
| NM_152280    | SYT11    | 1638 | 1748 | 13.176304105       |
| NM_152280    | SYT11    | 1155 | 1210 | 10.8543757742      |
| NM_152280    | SYT11    | 4870 | 4937 | 11.8503584099      |
| NM_021975    | RELA     | 1929 | 1979 | 6.97730045844      |
| NM_021975    | RELA     | 494  | 539  | 5.38832059347      |
| NM_021975    | RELA     | 397  | 484  | 6.39233819363      |
| NM_021975    | RELA     | 579  | 636  | 6.39233819363      |
| NM_021975    | RELA     | 1850 | 1895 | 6.38832059347      |
| NM_021975    | RELA     | 670  | 729  | 6.97730069435      |
| NM_021975    | RELA     | 769  | 824  | 5.39233818609      |
| NM_021975    | RELA     | 967  | 1066 | 6.97730069436      |
| NM_021975    | RELA     | 1528 | 1574 | 5.38832059347      |
| NM_021975    | RELA     | 860  | 942  | 6.39233146259      |
| NM_021975    | RELA     | 2495 | 2572 | 5.39233818609      |
| NM_015342    | PPWD1    | 1677 | 1726 | 5.28773344507      |
| NM_015342    | PPWD1    | 533  | 584  | 4.28755969476      |
| NM_015342    | PPWD1    | 1213 | 1275 | 4.2837158449       |
| NM_001077516 | SLC39A7  | 1903 | 1950 | 3.13392451421      |
| NM_001077516 | SLC39A7  | 313  | 382  | 6.45987020927      |
| NM_001077516 | SLC39A7  | 1300 | 1376 | 5.13794211439      |
| NM_001077516 | SLC39A7  | 129  | 309  | 6.94529703644      |
| NM_001077516 | SLC39A7  | 1958 | 2008 | 3.053802905        |
| NM_001077516 | SLC39A7  | 1818 | 1871 | 4.72290437919      |
| NM_001077516 | SLC39A7  | 1379 | 1534 | 6.94529703644      |
| NM_001077516 | SLC39A7  | 1567 | 1811 | 6.72290461511      |
| NM_001077516 | SLC39A7  | 1005 | 1292 | 8.30786711583      |
| NM_001077516 | SLC39A7  | 2029 | 2147 | 5.72290461511      |
| NM_001077516 | SLC39A7  | 405  | 974  | 9.495494119        |
| NM_033420    | C19orf6  | 743  | 799  | 6.43553288831      |
| NM_033420    | C19orf6  | 1786 | 1842 | 7.02049538903      |
| NM_033420    | C19orf6  | 550  | 643  | 8.24288781037      |
| NM_033420    | C19orf6  | 1684 | 1742 | 7.43553288831      |
| NM_033420    | C19orf6  | 106  | 186  | 6.43553288831      |
| NM_033420    | C19orf6  | 2500 | 2533 | 5.43552615726      |
| NM_033420    | C19orf6  | 1076 | 1186 | 9.24288781037      |
| NM_033420    | C19orf6  | 1988 | 2064 | 7.02049538903      |
| NM_033420    | C19orf6  | 2104 | 2262 | 8.24288781037      |
| NM_033420    | C19orf6  | 1196 | 1331 | 9.13597260645      |
| NM_033420    | C19orf6  | 1362 | 1556 | 8.60545788975      |
| NM_033420    | C19orf6  | 869  | 1071 | 9.13597260645      |
| NM_033420    | C19orf6  | 2389 | 2493 | 5.43553288831      |
| NM_033420    | C19orf6  | 242  | 548  | 10.5648159053      |
| NM_033420    | C19orf6  | 645  | 717  | 7.02049538903      |
| NM_033426    | KIAA1737 |      | 2940 | 2982 8.24407886226 |
| NM_033426    | KIAA1737 |      | 611  | 669 9.91317384131  |
| NM_015341    | NCAPH    | 513  | 574  | 6.25729573608      |
| NM_015341    | NCAPH    | 1697 | 1756 | 6.25729550771      |
| NM_015341    | NCAPH    | 2388 | 2482 | 6.8422582368       |

|           |          |      |      |                    |
|-----------|----------|------|------|--------------------|
| NM_015341 | NCAPH    | 1494 | 1561 | 5.25729573608      |
| NM_015341 | NCAPH    | 393  | 460  | 6.25729574363      |
| NM_015341 | NCAPH    | 2624 | 2679 | 5.25327814345      |
| NM_015341 | NCAPH    | 1060 | 1134 | 6.83824064417      |
| NM_015341 | NCAPH    | 1777 | 1866 | 6.84225824435      |
| NM_015341 | NCAPH    | 1140 | 1237 | 5.25729574363      |
| NM_006407 | ARL6IP5  | 363  | 447  | 4.69836591117      |
| NM_006407 | ARL6IP5  | 800  | 908  | 6.28332841189      |
| NM_006407 | ARL6IP5  | 450  | 597  | 8.69836591117      |
| NM_006407 | ARL6IP5  | 149  | 208  | 4.69434831099      |
| NM_006407 | ARL6IP5  | 239  | 356  | 6.28332841188      |
| NM_006407 | ARL6IP5  | 1865 | 1941 | 6.28332841167      |
| NM_015610 | WIPI2    | 3781 | 3843 | 5.84357380812      |
| NM_015610 | WIPI2    | 999  | 1059 | 6.65092873019      |
| NM_015610 | WIPI2    | 799  | 855  | 5.4285295778       |
| NM_015610 | WIPI2    | 4024 | 4089 | 3.84357380812      |
| NM_015610 | WIPI2    | 2064 | 2127 | 3.84357357221      |
| NM_015610 | WIPI2    | 1334 | 1418 | 6.84357380813      |
| NM_015610 | WIPI2    | 2315 | 2376 | 6.16549517196      |
| NM_015610 | WIPI2    | 1539 | 1760 | 7.42853630885      |
| NM_015610 | WIPI2    | 503  | 587  | 4.84357380813      |
| NM_015610 | WIPI2    | 364  | 457  | 7.75046440374      |
| NM_015610 | WIPI2    | 2143 | 2258 | 6.84357380813      |
| NM_015610 | WIPI2    | 602  | 678  | 4.84340005781      |
| NM_018227 | UBA6     | 140  | 182  | 6.38859294225      |
| NM_018227 | UBA6     | 1613 | 1660 | 8.05752090204      |
| NM_018227 | UBA6     | 2899 | 2941 | 6.38859294225      |
| NM_018227 | UBA6     | 4232 | 4289 | 7.46871455146      |
| NM_018227 | UBA6     | 1798 | 1875 | 6.47273215163      |
| NM_018227 | UBA6     | 4457 | 4494 | 6.38859294225      |
| NM_018227 | UBA6     | 2189 | 2248 | 7.47272542058      |
| NM_018227 | UBA6     | 1660 | 1708 | 6.46871455146      |
| NM_018227 | UBA6     | 3612 | 3694 | 8.05769465236      |
| NM_018227 | UBA6     | 4361 | 4410 | 6.47272542058      |
| NM_018227 | UBA6     | 3809 | 3952 | 9.47273215163      |
| NM_018227 | UBA6     | 640  | 694  | 6.47273215163      |
| NM_018227 | UBA6     | 4653 | 4752 | 6.47273215163      |
| NM_018227 | UBA6     | 386  | 549  | 8.79466024652      |
| NM_018227 | UBA6     | 3025 | 3143 | 8.79466024652      |
| NM_018224 | C7orf44  | 124  | 197  | 9.24969362625      |
| NM_018224 | C7orf44  | 280  | 316  | 6.92374793119      |
| NM_018224 | C7orf44  | 57   | 121  | 8.51272779617      |
| NM_018224 | C7orf44  | 499  | 594  | 8.51272803208      |
| NM_018224 | C7orf44  | 322  | 430  | 9.24969362625      |
| NM_018224 | C7orf44  | 664  | 743  | 7.92776553114      |
| NM_024947 | PHC3     | 2507 | 2560 | 7.9268205327       |
| NM_024947 | PHC3     | 623  | 708  | 9.51562688327      |
| NM_014878 | KIAA0020 |      | 1612 | 1661 5.40484630355 |
| NM_014878 | KIAA0020 |      | 1084 | 1136 4.40484606763 |
| NM_014877 | HELZ     | 8479 | 8539 | 7.60001845604      |

|           |        |       |       |               |
|-----------|--------|-------|-------|---------------|
| NM_014877 | HELZ   | 90    | 155   | 7.01506267882 |
| NM_014877 | HELZ   | 410   | 461   | 7.59985143677 |
| NM_014877 | HELZ   | 2077  | 2111  | 5.93092347698 |
| NM_014877 | HELZ   | 1889  | 1987  | 6.01506267882 |
| NM_014877 | HELZ   | 6799  | 6859  | 7.01505595531 |
| NM_014877 | HELZ   | 2700  | 2754  | 8.01506245045 |
| NM_014877 | HELZ   | 3053  | 3126  | 7.01104508619 |
| NM_014877 | HELZ   | 6128  | 6179  | 7.59985143677 |
| NM_014877 | HELZ   | 3441  | 3540  | 7.60002517954 |
| NM_014877 | HELZ   | 11961 | 12010 | 6.01506268637 |
| NM_014877 | HELZ   | 12081 | 12169 | 7.01506268637 |
| NM_014877 | HELZ   | 12587 | 12648 | 6.93092347698 |
| NM_014876 | JOSD1  | 1376  | 1434  | 8.98696003688 |
| NM_014876 | JOSD1  | 1191  | 1248  | 6.99097763683 |
| NM_014876 | JOSD1  | 2246  | 2395  | 8.57594013777 |
| NM_014876 | JOSD1  | 1639  | 1734  | 6.99097763705 |
| NM_014875 | KIF14  | 7061  | 7109  | 7.08724643353 |
| NM_014875 | KIF14  | 4164  | 4224  | 8.0872397027  |
| NM_014875 | KIF14  | 2841  | 2944  | 7.08322883358 |
| NM_014875 | KIF14  | 3997  | 4047  | 8.08707268343 |
| NM_014875 | KIF14  | 3565  | 3610  | 7.0872397027  |
| NM_014874 | MFN2   | 2659  | 2707  | 6.69878173536 |
| NM_014874 | MFN2   | 1082  | 1155  | 6.69895548568 |
| NM_014874 | MFN2   | 2018  | 2078  | 7.11399298496 |
| NM_014874 | MFN2   | 325   | 404   | 6.69895548568 |
| NM_014874 | MFN2   | 4535  | 4587  | 5.11398625391 |
| NM_014874 | MFN2   | 3909  | 4002  | 6.69895548546 |
| NM_014874 | MFN2   | 2362  | 2426  | 7.11399298496 |
| NM_014874 | MFN2   | 3458  | 3539  | 7.11399298496 |
| NM_014874 | MFN2   | 4327  | 4362  | 5.10997538479 |
| NM_014874 | MFN2   | 3541  | 3602  | 6.11398625391 |
| NM_014874 | MFN2   | 4215  | 4257  | 5.02985377558 |
| NM_014874 | MFN2   | 783   | 840   | 5.11398625391 |
| NM_014874 | MFN2   | 2130  | 2166  | 5.10997538479 |
| NM_014874 | MFN2   | 407   | 497   | 6.69895548568 |
| NM_014874 | MFN2   | 1422  | 1495  | 6.11399298474 |
| NM_014874 | MFN2   | 3845  | 3909  | 5.11399298474 |
| NM_014874 | MFN2   | 2509  | 2606  | 7.69895548568 |
| NM_014874 | MFN2   | 1818  | 1925  | 6.69895548568 |
| NM_014874 | MFN2   | 3153  | 3274  | 7.43592107985 |
| NM_014873 | LPGAT1 | 5742  | 5834  | 8.36156220582 |
| NM_014873 | LPGAT1 | 655   | 729   | 7.55420728376 |
| NM_014873 | LPGAT1 | 1084  | 1145  | 8.13916978448 |
| NM_014873 | LPGAT1 | 832   | 908   | 8.55420728376 |
| NM_014873 | LPGAT1 | 3912  | 3962  | 6.55420728376 |
| NM_014873 | LPGAT1 | 5837  | 5885  | 5.55420055271 |
| NM_014873 | LPGAT1 | 2896  | 2937  | 7.0550305751  |
| NM_014873 | LPGAT1 | 1931  | 2033  | 5.55420728376 |
| NM_014873 | LPGAT1 | 730   | 801   | 7.55420728376 |
| NM_014873 | LPGAT1 | 3387  | 3434  | 5.55403353345 |

|              |         |      |      |               |
|--------------|---------|------|------|---------------|
| NM_014873    | LPGAT1  | 6798 | 6863 | 5.47006807438 |
| NM_014873    | LPGAT1  | 4765 | 4833 | 7.55420728376 |
| NM_014873    | LPGAT1  | 1003 | 1061 | 7.13916978426 |
| NM_014873    | LPGAT1  | 1770 | 1835 | 6.55420728354 |
| NM_014873    | LPGAT1  | 1618 | 1663 | 6.55420727621 |
| NM_014873    | LPGAT1  | 497  | 654  | 9.2546470019  |
| NM_014873    | LPGAT1  | 1269 | 1384 | 8.13916978448 |
| NM_014873    | LPGAT1  | 359  | 406  | 5.47006807438 |
| NM_014873    | LPGAT1  | 3724 | 3788 | 5.55420704785 |
| NM_014873    | LPGAT1  | 131  | 190  | 7.13515218431 |
| NM_014873    | LPGAT1  | 198  | 274  | 8.72413228521 |
| NM_014873    | LPGAT1  | 2554 | 2661 | 6.55420728376 |
| NM_014873    | LPGAT1  | 2987 | 3081 | 6.55420728376 |
| NM_014873    | LPGAT1  | 282  | 356  | 8.55420728376 |
| NM_014873    | LPGAT1  | 6019 | 6137 | 8.36156220582 |
| NM_014873    | LPGAT1  | 407  | 485  | 8.36156220582 |
| NM_014873    | LPGAT1  | 3490 | 3545 | 6.55403353345 |
| NM_014870    | ZBTB40  | 3314 | 3362 | 6.63535546578 |
| NM_014870    | ZBTB40  | 6640 | 6735 | 8.22433556667 |
| NM_014870    | ZBTB40  | 4072 | 4159 | 6.63535546578 |
| NM_014870    | ZBTB40  | 1267 | 1352 | 6.63937283003 |
| NM_138729    | ST7L    | 982  | 1015 | 7.43409908896 |
| NM_138729    | ST7L    | 442  | 517  | 8.51823829835 |
| NM_138729    | ST7L    | 540  | 614  | 9.84015966218 |
| NM_138729    | ST7L    | 635  | 691  | 9.51823829813 |
| NM_182836    | RABGGTA | 1524 | 1594 | 8.59606010858 |
| NM_182836    | RABGGTA | 137  | 193  | 6.59204250841 |
| NM_182836    | RABGGTA | 937  | 1010 | 6.59605337753 |
| NM_018229    | MUDENG  | 667  | 734  | 7.76216548898 |
| NM_018229    | MUDENG  | 865  | 907  | 8.68204387977 |
| NM_018229    | MUDENG  | 2501 | 2561 | 9.35113885882 |
| NM_018229    | MUDENG  | 1237 | 1311 | 8.7661830816  |
| NM_018229    | MUDENG  | 587  | 649  | 8.76600933884 |
| NM_001099274 | TINF2   | 912  | 968  | 7.20089178524 |
| NM_001099274 | TINF2   | 403  | 480  | 6.20089178524 |
| NM_203379    | ACSL5   | 1121 | 1175 | 4.68891222536 |
| NM_203379    | ACSL5   | 1604 | 1689 | 4.1041234674  |
| NM_203379    | ACSL5   | 1709 | 1748 | 4.10010587478 |
| NM_001099270 | ZBTB34  | 5863 | 5882 | 8.56179078431 |
| NM_001100913 | PACS2   | 5048 | 5132 | 5.45968322153 |
| NM_001100913 | PACS2   | 1458 | 1520 | 7.04464572203 |
| NM_001100913 | PACS2   | 843  | 898  | 5.45566562136 |
| NM_001100913 | PACS2   | 1144 | 1264 | 7.0446457147  |
| NM_001100913 | PACS2   | 3145 | 3212 | 7.04464572225 |
| NM_001100913 | PACS2   | 3435 | 3487 | 5.45950947121 |
| NM_001100913 | PACS2   | 2301 | 2351 | 6.45566562136 |
| NM_001100913 | PACS2   | 657  | 716  | 5.45566562136 |
| NM_012435    | SHC2    | 1234 | 1281 | 9.47575657477 |
| NM_012435    | SHC2    | 972  | 1014 | 8.39563496556 |
| NM_012435    | SHC2    | 459  | 500  | 8.39563496556 |

|           |          |      |      |               |               |
|-----------|----------|------|------|---------------|---------------|
| NM_012435 | SHC2     | 1493 | 1567 | 9.47575657477 |               |
| NM_012435 | SHC2     | 645  | 695  | 8.47976744389 |               |
| NM_012435 | SHC2     | 1052 | 1090 | 9.47575657477 |               |
| NM_012434 | SLC17A5  | 1553 | 1639 | 10.6090437169 |               |
| NM_012434 | SLC17A5  | 985  | 1073 | 11.346009311  |               |
| NM_012434 | SLC17A5  | 414  | 474  | 10.0240812162 |               |
| NM_012434 | SLC17A5  | 674  | 713  | 9.60502611671 |               |
| NM_012434 | SLC17A5  | 1651 | 1697 | 9.60903698583 |               |
| NM_012434 | SLC17A5  | 1117 | 1276 | 12.1115440574 |               |
| NM_012434 | SLC17A5  | 2001 | 2116 | 10.8314361382 |               |
| NM_012434 | SLC17A5  | 1277 | 1413 | 11.4835128348 |               |
| NM_012434 | SLC17A5  | 533  | 656  | 11.6090437169 |               |
| NM_012434 | SLC17A5  | 114  | 202  | 9.60904371688 |               |
| NM_012434 | SLC17A5  | 221  | 401  | 12.6090437169 |               |
| NM_012434 | SLC17A5  | 735  | 877  | 12.2720087296 |               |
| NM_012434 | SLC17A5  | 1422 | 1529 | 9.02408121616 |               |
| NM_012434 | SLC17A5  | 2755 | 2842 | 8.02408121616 |               |
| NM_012434 | SLC17A5  | 1759 | 1830 | 9.02408120861 |               |
| NM_012437 | SNAPIN   | 217  | 259  | 8.30362559557 |               |
| NM_012124 | CHORDC1  | 2224 | 2307 | 5.36653060732 |               |
| NM_012124 | CHORDC1  | 1438 | 1518 | 5.36653060733 |               |
| NM_012124 | CHORDC1  | 1024 | 1175 | 7.17388552939 |               |
| NM_012124 | CHORDC1  | 800  | 928  | 5.95149310804 |               |
| NM_012124 | CHORDC1  | 1216 | 1381 | 4.36653060733 |               |
| NM_012124 | CHORDC1  | 438  | 668  | 7.68845870221 |               |
| NM_174929 | ZMIZ2    | 22   | 104  | 9.16884298954 |               |
| NM_174929 | ZMIZ2    | 3747 | 3833 | 10.1688429895 |               |
| NM_174929 | ZMIZ2    | 1220 | 1275 | 9.75380549025 |               |
| NM_174929 | ZMIZ2    | 2625 | 2770 | 10.7538054903 |               |
| NM_174929 | ZMIZ2    | 1397 | 1432 | 8.16482538937 |               |
| NM_174929 | ZMIZ2    | 2320 | 2360 | 9.16884298932 |               |
| NM_174929 | ZMIZ2    | 3441 | 3507 | 9.16884298953 |               |
| NM_174929 | ZMIZ2    | 1301 | 1396 | 10.9761979116 |               |
| NM_174929 | ZMIZ2    | 576  | 630  | 8.16482538937 |               |
| NM_174929 | ZMIZ2    | 3538 | 3647 | 9.16884298954 |               |
| NM_174929 | ZMIZ2    | 159  | 222  | 8.16884275362 |               |
| NM_174929 | ZMIZ2    | 1798 | 1993 | 11.338767991  |               |
| NM_174929 | ZMIZ2    | 1488 | 1765 | 10.9761979116 |               |
| NM_012121 | CDC42EP4 |      | 1281 | 1362          | 7.03454044225 |
| NM_012121 | CDC42EP4 |      | 2050 | 2101          | 8.61967669328 |
| NM_012121 | CDC42EP4 |      | 111  | 183           | 9.03471419257 |
| NM_012121 | CDC42EP4 |      | 2171 | 2259          | 7.03471419257 |
| NM_012121 | CDC42EP4 |      | 2440 | 2488          | 6.95057498318 |
| NM_012121 | CDC42EP4 |      | 330  | 371           | 8.61565909312 |
| NM_012120 | CD2AP    | 998  | 1070 | 4.55243509975 |               |
| NM_012120 | CD2AP    | 1548 | 1600 | 5.1372305812  |               |
| NM_012120 | CD2AP    | 3040 | 3100 | 3.54842423063 |               |
| NM_012120 | CD2AP    | 3564 | 3681 | 5.5524418308  |               |
| NM_012120 | CD2AP    | 3300 | 3379 | 6.55244183058 |               |
| NM_012120 | CD2AP    | 1405 | 1482 | 5.13740433152 |               |



|              |        |      |      |               |
|--------------|--------|------|------|---------------|
| NM_012120    | CD2AP  | 3744 | 3804 | 3.55226808048 |
| NM_012120    | CD2AP  | 2193 | 2293 | 5.87436992569 |
| NM_012120    | CD2AP  | 456  | 514  | 3.55244182325 |
| NM_012120    | CD2AP  | 1286 | 1356 | 3.54842423063 |
| NM_012120    | CD2AP  | 1205 | 1251 | 3.46830262142 |
| NM_012120    | CD2AP  | 1801 | 1901 | 5.13740433152 |
| NM_012120    | CD2AP  | 4733 | 4773 | 3.46830262142 |
| NM_012120    | CD2AP  | 854  | 903  | 3.46830262142 |
| NM_012120    | CD2AP  | 2399 | 2503 | 5.5524418308  |
| NM_012120    | CD2AP  | 3100 | 3189 | 4.5524418308  |
| NM_012120    | CD2AP  | 2806 | 2877 | 3.55244159488 |
| NM_014214    | IMPA2  | 573  | 637  | 6.424023365   |
| NM_014214    | IMPA2  | 1335 | 1390 | 5.42419711509 |
| NM_138374    | ZNF845 | 183  | 236  | 9.32299454201 |
| NM_001001740 | RFWD2  | 1667 | 1766 | 5.96760871017 |
| NM_001001740 | RFWD2  | 1281 | 1372 | 7.55257121089 |
| NM_001001740 | RFWD2  | 1891 | 1990 | 7.96761544122 |
| NM_178014    | TUBB   | 2507 | 2641 | 5.61113152013 |
| NM_178014    | TUBB   | 152  | 252  | 5.06364372483 |
| NM_178014    | TUBB   | 2173 | 2299 | 4.53312900813 |
| NM_178014    | TUBB   | 1398 | 2075 | 8.00706019646 |
| NM_178014    | TUBB   | 2347 | 2480 | 4.17055892874 |
| NM_178014    | TUBB   | 300  | 1394 | 8.91779285836 |
| NM_183416    | KIF1B  | 5584 | 5623 | 7.80500730359 |
| NM_183416    | KIF1B  | 818  | 851  | 5.80500729604 |
| NM_183416    | KIF1B  | 2020 | 2117 | 5.80500729604 |
| NM_183416    | KIF1B  | 1774 | 1832 | 5.80098970342 |
| NM_183416    | KIF1B  | 1498 | 1557 | 5.80500057253 |
| NM_183416    | KIF1B  | 146  | 243  | 7.80500730359 |
| NM_183416    | KIF1B  | 507  | 578  | 6.80500730359 |
| NM_183416    | KIF1B  | 5712 | 5765 | 6.80500730359 |
| NM_201269    | ZNF644 | 4129 | 4190 | 6.39845706377 |
| NM_201269    | ZNF644 | 3661 | 3722 | 6.98342629532 |
| NM_201269    | ZNF644 | 3449 | 3556 | 6.98342629554 |
| NM_178012    | TUBB2B | 1695 | 1749 | 5.96574289442 |
| NM_178012    | TUBB2B | 1272 | 1340 | 4.9617320253  |
| NM_178012    | TUBB2B | 1384 | 1446 | 4.96574962548 |
| NM_178012    | TUBB2B | 1156 | 1237 | 4.96574962548 |
| NM_206962    | PRMT2  | 1204 | 1246 | 5.9743254295  |
| NM_206962    | PRMT2  | 428  | 481  | 4.97031456038 |
| NM_206962    | PRMT2  | 124  | 164  | 6.5552770611  |
| NM_206962    | PRMT2  | 1983 | 2050 | 6.5552770611  |
| NM_206962    | PRMT2  | 705  | 801  | 7.55929466127 |
| NM_206962    | PRMT2  | 175  | 265  | 5.97031456038 |
| NM_206962    | PRMT2  | 600  | 685  | 4.974332153   |
| NM_015617    | PYG01  | 4370 | 4398 | 10.8137021877 |
| NM_005232    | EPHA1  | 2906 | 2954 | 9.91684735939 |
| NM_005232    | EPHA1  | 2988 | 3049 | 7.91667360908 |
| NM_005232    | EPHA1  | 159  | 227  | 7.91684712347 |
| NM_005232    | EPHA1  | 1404 | 1500 | 9.91684735939 |

|           |          |      |      |                    |
|-----------|----------|------|------|--------------------|
| NM_005232 | EPHA1    | 2571 | 2678 | 9.50180986011      |
| NM_005232 | EPHA1    | 1742 | 1795 | 8.91684062834      |
| NM_005232 | EPHA1    | 572  | 614  | 9.49779225994      |
| NM_005232 | EPHA1    | 2445 | 2482 | 7.83270815001      |
| NM_005232 | EPHA1    | 957  | 1032 | 7.91282975922      |
| NM_005232 | EPHA1    | 842  | 899  | 9.49779225994      |
| NM_005232 | EPHA1    | 2278 | 2357 | 8.91684735939      |
| NM_005232 | EPHA1    | 1927 | 2064 | 10.2387754543      |
| NM_005232 | EPHA1    | 670  | 759  | 9.91684735939      |
| NM_005232 | EPHA1    | 2364 | 2437 | 7.91684735917      |
| NM_005232 | EPHA1    | 2500 | 2548 | 8.91684062834      |
| NM_005232 | EPHA1    | 2804 | 2851 | 7.91667360908      |
| NM_005232 | EPHA1    | 1522 | 1654 | 9.50180986011      |
| NM_004708 | PDCD5    | 384  | 534  | 3.39036388647      |
| NM_004708 | PDCD5    | 288  | 332  | 1.06826204126      |
| NM_004708 | PDCD5    | 45   | 132  | 1.65339828475      |
| NM_004708 | PDCD5    | 193  | 234  | 0.984296582195     |
| NM_173595 | ANKRD52  | 544  | 631  | 8.67708738058      |
| NM_173595 | ANKRD52  | 7660 | 7699 | 7.6811049732       |
| NM_173595 | ANKRD52  | 7310 | 7382 | 9.2620498813       |
| NM_173595 | ANKRD52  | 2787 | 2836 | 7.59696577137      |
| NM_173595 | ANKRD52  | 3099 | 3142 | 8.59696577137      |
| NM_173595 | ANKRD52  | 6299 | 6386 | 8.6810982497       |
| NM_173595 | ANKRD52  | 4979 | 5033 | 9.26606075042      |
| NM_173595 | ANKRD52  | 1662 | 1720 | 8.6810982497       |
| NM_173595 | ANKRD52  | 6553 | 6626 | 9.68110498053      |
| NM_173595 | ANKRD52  | 284  | 378  | 8.68110498075      |
| NM_173595 | ANKRD52  | 2280 | 2339 | 7.6810982497       |
| NM_173595 | ANKRD52  | 978  | 1045 | 7.68110498075      |
| NM_173595 | ANKRD52  | 1065 | 1098 | 7.59696577137      |
| NM_173595 | ANKRD52  | 2058 | 2136 | 8.68093123044      |
| NM_173595 | ANKRD52  | 3563 | 3655 | 9.26606748148      |
| NM_173595 | ANKRD52  | 4660 | 4711 | 9.26606075042      |
| NM_173595 | ANKRD52  | 1178 | 1298 | 10.0030330756      |
| NM_173595 | ANKRD52  | 1311 | 1410 | 7.6810982497       |
| NM_173595 | ANKRD52  | 8025 | 8108 | 7.67708738058      |
| NM_173595 | ANKRD52  | 2455 | 2546 | 9.26606724556      |
| NM_173595 | ANKRD52  | 8198 | 8283 | 8.68093123044      |
| NM_173593 | B4GALNT3 |      | 1034 | 1119 11.4014897922 |
| NM_004701 | CCNB2    | 1386 | 1473 | 6.36074439469      |
| NM_004701 | CCNB2    | 800  | 854  | 6.58313681602      |
| NM_004701 | CCNB2    | 253  | 324  | 3.77560814365      |
| NM_004701 | CCNB2    | 1149 | 1202 | 3.77560814365      |
| NM_004701 | CCNB2    | 1050 | 1102 | 3.69164268458      |
| NM_004701 | CCNB2    | 436  | 598  | 6.36074439469      |
| NM_004701 | CCNB2    | 1276 | 1348 | 5.36057064437      |
| NM_004701 | CCNB2    | 203  | 249  | 4.77176429379      |
| NM_004703 | RABEP1   | 1381 | 1456 | 4.88554820165      |
| NM_004703 | RABEP1   | 3150 | 3228 | 3.88538118239      |
| NM_004703 | RABEP1   | 688  | 726  | 3.88153733253      |

|           |        |      |      |               |
|-----------|--------|------|------|---------------|
| NM_004703 | RABEP1 | 3577 | 3642 | 3.80141572332 |
| NM_004704 | RRP9   | 895  | 932  | 7.30856760683 |
| NM_004704 | RRP9   | 582  | 622  | 7.31258519946 |
| NM_004705 | PRKRIR | 1245 | 1284 | 5.89261920426 |
| NM_004705 | PRKRIR | 2525 | 2624 | 7.48159930516 |
| NM_004707 | ATG12  | 521  | 564  | 5.24782810843 |
| NM_004707 | ATG12  | 961  | 993  | 6.24782810843 |
| NM_004707 | ATG12  | 606  | 686  | 6.83279060915 |
| NM_006079 | CITED2 | 1222 | 1308 | 7.14144718028 |
| NM_001251 | CD68   | 616  | 689  | 5.16153089095 |
| NM_001251 | CD68   | 138  | 185  | 6.16153112686 |
| NM_001251 | CD68   | 366  | 437  | 5.16153112687 |
| NM_001251 | CD68   | 305  | 364  | 6.16153112687 |
| NM_001251 | CD68   | 1307 | 1375 | 7.16153112687 |
| NM_001251 | CD68   | 738  | 817  | 7.74649362759 |
| NM_001251 | CD68   | 928  | 1098 | 8.6209627455  |
| NM_001251 | CD68   | 827  | 918  | 8.33145612831 |
| NM_001251 | CD68   | 189  | 232  | 6.07739191748 |
| NM_001251 | CD68   | 494  | 554  | 5.15751352669 |
| NM_001251 | CD68   | 1541 | 1615 | 6.16153111932 |
| NM_001251 | CD68   | 1112 | 1268 | 8.86197084501 |
| NM_001251 | CD68   | 1418 | 1479 | 5.16153112686 |
| NM_000465 | BARD1  | 1133 | 1176 | 10.2044335108 |
| NM_000465 | BARD1  | 2298 | 2348 | 8.69959261931 |
| NM_000465 | BARD1  | 1013 | 1077 | 8.70343646917 |
| NM_000466 | PEX1   | 3355 | 3412 | 7.90832499656 |
| NM_000466 | PEX1   | 3426 | 3503 | 9.23025982227 |
| NM_000466 | PEX1   | 2354 | 2429 | 6.90832499656 |
| NM_000463 | UGT1A1 | 497  | 549  | 11.285921371  |
| NM_139075 | TPCN2  | 2168 | 2231 | 11.1970377796 |
| NM_139075 | TPCN2  | 318  | 392  | 10.7820002804 |
| NM_139075 | TPCN2  | 2801 | 2901 | 10.7820002804 |
| NM_139075 | TPCN2  | 2019 | 2082 | 10.1970377796 |
| NM_139075 | TPCN2  | 970  | 1036 | 10.1970377721 |
| NM_139075 | TPCN2  | 751  | 842  | 11.1970377796 |
| NM_139075 | TPCN2  | 1892 | 1951 | 10.7820002804 |
| NM_139075 | TPCN2  | 2267 | 2307 | 9.19302017947 |
| NM_139075 | TPCN2  | 1978 | 2017 | 9.19302017947 |
| NM_139075 | TPCN2  | 567  | 648  | 10.1970377796 |
| NM_139075 | TPCN2  | 1391 | 1540 | 11.1970377796 |
| NM_139075 | TPCN2  | 650  | 743  | 11.7820002804 |
| NM_139075 | TPCN2  | 398  | 458  | 9.19302017947 |
| NM_139075 | TPCN2  | 2086 | 2158 | 11.5189658745 |
| NM_139075 | TPCN2  | 844  | 928  | 11.1970377796 |
| NM_006854 | KDEL2  | 1472 | 1570 | 5.17246202818 |
| NM_006854 | KDEL2  | 2025 | 2082 | 4.17228828542 |
| NM_006854 | KDEL2  | 1362 | 1407 | 4.75742453646 |
| NM_006854 | KDEL2  | 1407 | 1457 | 4.16844443556 |
| NM_006854 | KDEL2  | 1137 | 1189 | 6.17246203573 |
| NM_006854 | KDEL2  | 2169 | 2254 | 5.17246203573 |

|              |        |      |      |               |
|--------------|--------|------|------|---------------|
| NM_006854    | KDELR2 | 1966 | 2024 | 3.17246203573 |
| NM_006854    | KDELR2 | 1580 | 1638 | 4.75742453646 |
| NM_006854    | KDELR2 | 2262 | 2390 | 6.49439013062 |
| NM_006854    | KDELR2 | 2710 | 2775 | 4.17245530468 |
| NM_006854    | KDELR2 | 2393 | 2534 | 7.49439013062 |
| NM_006854    | KDELR2 | 2544 | 2648 | 5.75742453646 |
| NM_006854    | KDELR2 | 48   | 116  | 3.17228828542 |
| NM_006854    | KDELR2 | 156  | 1074 | 10.53878425   |
| NM_006854    | KDELR2 | 1238 | 1362 | 7.07935263134 |
| NM_006854    | KDELR2 | 1787 | 1899 | 4.17246203573 |
| NM_006852    | TLK2   | 277  | 308  | 3.81360402804 |
| NM_006852    | TLK2   | 1038 | 1091 | 4.81360402804 |
| NM_001707    | BCL7B  | 1021 | 1063 | 8.7635671334  |
| NM_001707    | BCL7B  | 618  | 699  | 8.17859790917 |
| NM_001707    | BCL7B  | 1269 | 1345 | 8.76356714094 |
| NM_001707    | BCL7B  | 877  | 962  | 8.76356714072 |
| NM_001707    | BCL7B  | 374  | 466  | 8.76356714095 |
| NM_006858    | TMED1  | 1005 | 1115 | 5.35647255219 |
| NM_006858    | TMED1  | 377  | 451  | 5.35646582868 |
| NM_006858    | TMED1  | 451  | 499  | 7.94143506046 |
| NM_006858    | TMED1  | 285  | 355  | 7.67840065463 |
| NM_006858    | TMED1  | 577  | 626  | 6.35629880942 |
| NM_006858    | TMED1  | 808  | 879  | 5.35647232382 |
| NM_006858    | TMED1  | 730  | 758  | 5.35629880942 |
| NM_001254    | CDC6   | 776  | 888  | 7.45901211386 |
| NM_001254    | CDC6   | 1145 | 1205 | 5.45901211385 |
| NM_001254    | CDC6   | 1531 | 1567 | 6.37487290447 |
| NM_001254    | CDC6   | 1210 | 1266 | 7.78094020875 |
| NM_001254    | CDC6   | 2160 | 2203 | 6.45901211364 |
| NM_001254    | CDC6   | 1681 | 1758 | 7.04397461457 |
| NM_001254    | CDC6   | 470  | 520  | 7.04397460703 |
| NM_001254    | CDC6   | 1437 | 1496 | 6.37487290447 |
| NM_001254    | CDC6   | 1282 | 1359 | 8.04397461458 |
| NM_001254    | CDC6   | 2687 | 2730 | 6.45883836354 |
| NM_001254    | CDC6   | 889  | 942  | 6.37487290447 |
| NM_001254    | CDC6   | 982  | 1097 | 8.26636703592 |
| NM_001254    | CDC6   | 220  | 375  | 7.04397461458 |
| NM_001254    | CDC6   | 72   | 213  | 5.45901211386 |
| NM_001105570 | NUDT19 | 2364 | 2402 | 9.91292823333 |
| NM_001105570 | NUDT19 | 1751 | 1816 | 9.91292823333 |
| NM_001105570 | NUDT19 | 2494 | 2529 | 9.91694583351 |
| NM_001146069 | MFSD10 | 1011 | 1083 | 8.19547156094 |
| NM_001146069 | MFSD10 | 334  | 455  | 12.2829344022 |
| NM_001146069 | MFSD10 | 1392 | 1524 | 11.6549031796 |
| NM_001146069 | MFSD10 | 565  | 647  | 9.78043406167 |
| NM_001146069 | MFSD10 | 496  | 559  | 9.19547156094 |
| NM_001146069 | MFSD10 | 178  | 298  | 11.5173996558 |
| NM_001146069 | MFSD10 | 1621 | 1717 | 11.8959112791 |
| NM_001146069 | MFSD10 | 810  | 1006 | 12.4433990744 |
| NM_001146069 | MFSD10 | 659  | 804  | 11.3653965624 |

|              |        |      |      |               |
|--------------|--------|------|------|---------------|
| NM_001146069 | MFS10  | 1144 | 1356 | 12.5173996558 |
| NM_004564    | PET112 | 269  | 369  | 7.7249011388  |
| NM_020177    | FEM1C  | 1771 | 1824 | 6.22825389509 |
| NM_020177    | FEM1C  | 543  | 585  | 6.31221935416 |
| NM_020177    | FEM1C  | 1496 | 1530 | 6.3083755043  |
| NM_020177    | FEM1C  | 421  | 533  | 8.31239310447 |
| NM_020177    | FEM1C  | 3115 | 3200 | 7.31239309692 |
| NM_004563    | PCK2   | 563  | 632  | 2.40861719589 |
| NM_004563    | PCK2   | 1781 | 1859 | 4.40861719589 |
| NM_004563    | PCK2   | 452  | 488  | 2.40459959572 |
| NM_004563    | PCK2   | 837  | 878  | 2.40844344557 |
| NM_004563    | PCK2   | 688  | 738  | 3.40459959572 |
| NM_004563    | PCK2   | 1403 | 1565 | 4.73054529078 |
| NM_024792    | FAM57A | 599  | 651  | 9.69492673193 |
| NM_024792    | FAM57A | 1714 | 1814 | 9.10996423143 |
| NM_024792    | FAM57A | 1955 | 2013 | 9.43189232632 |
| NM_024792    | FAM57A | 468  | 571  | 9.43189232632 |
| NM_024792    | FAM57A | 1074 | 1149 | 9.4318920904  |
| NM_024792    | FAM57A | 917  | 958  | 8.10594663126 |
| NM_024792    | FAM57A | 1269 | 1342 | 8.10996423143 |
| NM_024792    | FAM57A | 984  | 1048 | 8.69492649623 |
| NM_024792    | FAM57A | 1638 | 1700 | 8.69492673193 |
| NM_024792    | FAM57A | 685  | 763  | 8.10996423143 |
| NM_024792    | FAM57A | 195  | 334  | 10.6949267321 |
| NM_172173    | CAMK2G | 1812 | 1847 | 7.59192772205 |
| NM_001246    | ENTPD2 | 474  | 521  | 7.01037130511 |
| NM_001246    | ENTPD2 | 1095 | 1159 | 8.679473015   |
| NM_172177    | MRPL42 | 289  | 408  | 6.98823976277 |
| NM_172177    | MRPL42 | 908  | 965  | 3.39925966187 |
| NM_172177    | MRPL42 | 2692 | 2749 | 3.31913805266 |
| NM_172177    | MRPL42 | 183  | 277  | 5.72520535671 |
| NM_016732    | RALY   | 1020 | 1089 | 5.99355891801 |
| NM_016732    | RALY   | 893  | 967  | 6.18620399595 |
| NM_016732    | RALY   | 818  | 890  | 3.18620399595 |
| NM_016732    | RALY   | 1441 | 1518 | 5.18620399595 |
| NM_016732    | RALY   | 495  | 590  | 5.77116649667 |
| NM_016732    | RALY   | 1645 | 1686 | 3.18620376003 |
| NM_016732    | RALY   | 1105 | 1234 | 5.50813209084 |
| NM_016732    | RALY   | 603  | 764  | 7.18620399595 |
| NM_016732    | RALY   | 1346 | 1428 | 3.18620399595 |
| NM_004990    | MARS   | 126  | 182  | 4.7625337677  |
| NM_004990    | MARS   | 766  | 810  | 3.76655136765 |
| NM_004990    | MARS   | 898  | 954  | 6.35151386859 |
| NM_004990    | MARS   | 957  | 1031 | 6.08847946276 |
| NM_004990    | MARS   | 215  | 274  | 5.76655136787 |
| NM_004990    | MARS   | 820  | 869  | 6.35151386859 |
| NM_004990    | MARS   | 1742 | 1840 | 6.08847946276 |
| NM_004990    | MARS   | 2550 | 2604 | 4.76637761755 |
| NM_004990    | MARS   | 591  | 740  | 6.35151386859 |
| NM_004990    | MARS   | 1042 | 1175 | 5.76655136787 |

|              |          |      |      |                   |
|--------------|----------|------|------|-------------------|
| NM_004990    | MARS     | 2433 | 2517 | 3.76655136787     |
| NM_004990    | MARS     | 1179 | 1339 | 6.93647636931     |
| NM_004990    | MARS     | 422  | 576  | 6.76655136787     |
| NM_004990    | MARS     | 275  | 416  | 7.08847946276     |
| NM_004990    | MARS     | 1866 | 2205 | 8.81094548723     |
| NM_004990    | MARS     | 2617 | 2826 | 5.76655136787     |
| NM_004990    | MARS     | 2208 | 2404 | 7.22598298651     |
| NM_004990    | MARS     | 1346 | 1575 | 7.22598298651     |
| NM_001005417 | B4GALT2  | 1143 | 1219 | 7.61960543562     |
| NM_001005417 | B4GALT2  | 189  | 286  | 7.70374464501     |
| NM_014755    | SERTAD2  | 961  | 1048 | 7.01344329275     |
| NM_014755    | SERTAD2  | 307  | 366  | 6.01745416187     |
| NM_020390    | EIF5A2   | 1716 | 1758 | 9.94520746848     |
| NM_000289    | PFKM     | 1095 | 1144 | 11.020935244      |
| NM_144598    | LRRC28   | 178  | 295  | 11.0378942024     |
| NM_144599    | NIPA1    | 1384 | 1432 | 7.87648623737     |
| NM_144599    | NIPA1    | 1060 | 1167 | 9.88050383754     |
| NM_144599    | NIPA1    | 418  | 495  | 7.87648623737     |
| NM_000281    | PCBD1    | 297  | 343  | 6.48431468133     |
| NM_000281    | PCBD1    | 537  | 609  | 5.90336977324     |
| NM_000281    | PCBD1    | 400  | 464  | 6.48833204559     |
| NM_000281    | PCBD1    | 738  | 904  | 7.48833228151     |
| NM_000282    | PCCA     | 328  | 370  | 4.90218443078     |
| NM_000282    | PCCA     | 2236 | 2314 | 4.90235818087     |
| NM_000282    | PCCA     | 1612 | 1665 | 5.90218443078     |
| NM_000282    | PCCA     | 1450 | 1519 | 6.48732068181     |
| NM_000285    | PEPD     | 152  | 197  | 6.01824147834     |
| NM_000285    | PEPD     | 389  | 430  | 5.01807445908     |
| NM_000285    | PEPD     | 1634 | 1688 | 6.6030369598      |
| NM_000285    | PEPD     | 1838 | 1930 | 6.0182482094      |
| NM_000285    | PEPD     | 1703 | 1755 | 6.01807445908     |
| NM_000285    | PEPD     | 1433 | 1621 | 8.0182482094      |
| NM_000285    | PEPD     | 899  | 1093 | 8.18817321084     |
| NM_000285    | PEPD     | 442  | 568  | 7.34017630428     |
| NM_000285    | PEPD     | 1221 | 1293 | 5.01824820917     |
| NM_000285    | PEPD     | 580  | 834  | 8.34017630428     |
| NM_000284    | PDHA1    | 634  | 734  | 4.44673604221     |
| NM_000284    | PDHA1    | 583  | 633  | 4.44271844204     |
| NM_000284    | PDHA1    | 1101 | 1166 | 5.44672931116     |
| NM_000284    | PDHA1    | 878  | 939  | 6.44673604222     |
| NM_000284    | PDHA1    | 318  | 439  | 6.7686641371      |
| NM_000284    | PDHA1    | 940  | 1021 | 5.4465622919      |
| NM_000284    | PDHA1    | 789  | 851  | 6.03169854294     |
| NM_000287    | PEX6     | 2090 | 2146 | 9.71611931355     |
| NM_000287    | PEX6     | 930  | 972  | 9.71629305632     |
| NM_000287    | PEX6     | 1647 | 1731 | 8.7122754637      |
| NM_000287    | PEX6     | 26   | 128  | 10.3012555646     |
| NM_001012329 | CTNNBIP1 |      | 336  | 399 5.66769863898 |
| NM_001012321 | RPSA     | 891  | 952  | 4.1497819856      |
| NM_001012321 | RPSA     | 2    | 66   | 3.49770528902     |

|              |        |      |      |               |
|--------------|--------|------|------|---------------|
| NM_001012321 | RPSA   | 699  | 877  | 5.27531286768 |
| NM_001012321 | RPSA   | 456  | 682  | 5.08266778974 |
| NM_001012321 | RPSA   | 147  | 448  | 5.27531286768 |
| NM_138619    | GGA3   | 2432 | 2471 | 6.33611646736 |
| NM_138619    | GGA3   | 2053 | 2094 | 6.3359494481  |
| NM_138619    | GGA3   | 409  | 447  | 5.25198398903 |
| NM_138619    | GGA3   | 159  | 192  | 5.25198398903 |
| NM_138619    | GGA3   | 843  | 904  | 6.33210559824 |
| NM_138619    | GGA3   | 734  | 842  | 7.33612319841 |
| NM_006708    | GL01   | 1861 | 1923 | 3.73459326313 |
| NM_006708    | GL01   | 1004 | 1064 | 3.73861086308 |
| NM_006708    | GL01   | 1446 | 1488 | 5.32357312811 |
| NM_006708    | GL01   | 734  | 780  | 5.73861086331 |
| NM_006708    | GL01   | 798  | 854  | 5.32357312811 |
| NM_006708    | GL01   | 61   | 137  | 6.06053895797 |
| NM_006708    | GL01   | 1213 | 1271 | 3.73459326313 |
| NM_006708    | GL01   | 470  | 712  | 7.73861086331 |
| NM_004774    | MED1   | 7992 | 8050 | 6.24939918293 |
| NM_004774    | MED1   | 6390 | 6435 | 6.16526020946 |
| NM_004774    | MED1   | 538  | 578  | 7.24538181867 |
| NM_004774    | MED1   | 3779 | 3850 | 6.24538181867 |
| NM_004774    | MED1   | 1084 | 1139 | 7.83435518851 |
| NM_004774    | MED1   | 422  | 494  | 7.16526020946 |
| NM_004774    | MED1   | 2644 | 2746 | 7.83034431939 |
| NM_004774    | MED1   | 883  | 1027 | 8.83436191957 |
| NM_004774    | MED1   | 2091 | 2178 | 6.24538181867 |
| NM_004774    | MED1   | 5391 | 5469 | 7.2493994113  |
| NM_004774    | MED1   | 1635 | 1718 | 6.24939268779 |
| NM_006704    | SUGT1  | 176  | 204  | 3.85956786585 |
| NM_006704    | SUGT1  | 288  | 379  | 3.94370683931 |
| NM_006703    | NUDT3  | 1034 | 1083 | 3.80452072957 |
| NM_006703    | NUDT3  | 989  | 1023 | 3.80452072957 |
| NM_006703    | NUDT3  | 826  | 907  | 5.3894899538  |
| NM_006703    | NUDT3  | 1086 | 1151 | 3.72038825124 |
| NM_006703    | NUDT3  | 594  | 697  | 3.80452072957 |
| NM_006703    | NUDT3  | 1656 | 1744 | 4.80452072957 |
| NM_006700    | TRAFD1 | 929  | 989  | 8.26439043228 |
| NM_006700    | TRAFD1 | 410  | 462  | 7.3445120415  |
| NM_006700    | TRAFD1 | 82   | 130  | 8.3445120415  |
| NM_006701    | TXNL4A | 210  | 490  | 6.7107265755  |
| NM_006701    | TXNL4A | 568  | 748  | 4.97376098134 |
| NM_002027    | FNTA   | 683  | 824  | 7.83911666065 |
| NM_002027    | FNTA   | 861  | 938  | 6.25414742888 |
| NM_002026    | FN1    | 3779 | 3862 | 1.72137617319 |
| NM_002026    | FN1    | 7902 | 8003 | 2.30633867392 |
| NM_002026    | FN1    | 3494 | 3776 | 3.98441057903 |
| NM_002026    | FN1    | 383  | 1158 | 5.37672800181 |
| NM_002026    | FN1    | 5498 | 6027 | 4.52873109525 |
| NM_002026    | FN1    | 1162 | 3490 | 6.98064866023 |
| NM_002026    | FN1    | 4691 | 5496 | 4.87518150927 |

|              |              |       |       |                   |
|--------------|--------------|-------|-------|-------------------|
| NM_002026    | FN1          | 4451  | 4690  | 3.25742907343     |
| NM_002026    | FN1          | 7     | 369   | 2.72137617319     |
| NM_002026    | FN1          | 3868  | 4451  | 5.07187342028     |
| NM_002026    | FN1          | 6130  | 7872  | 6.45473051381     |
| NM_002026    | FN1          | 6064  | 6130  | -0.600551921915   |
| NM_001242713 | LOC100289561 |       | 86    | 141 5.66694895056 |
| NM_004773    | ZNHIT3       | 494   | 609   | 7.75065015172     |
| NM_004773    | ZNHIT3       | 176   | 275   | 7.42872205683     |
| NM_007033    | RER1         | 2823  | 2896  | 6.29029672553     |
| NM_007033    | RER1         | 558   | 700   | 11.181790857      |
| NM_007033    | RER1         | 1993  | 2086  | 8.6963640298      |
| NM_007033    | RER1         | 1595  | 1644  | 6.29029672553     |
| NM_007033    | RER1         | 762   | 850   | 9.54436093635     |
| NM_007033    | RER1         | 2124  | 2166  | 7.95922468531     |
| NM_007033    | RER1         | 1184  | 1397  | 10.3744359349     |
| NM_007033    | RER1         | 1408  | 1459  | 6.37442920386     |
| NM_007033    | RER1         | 165   | 537   | 11.6598381538     |
| NM_007033    | RER1         | 853   | 1061  | 9.95939843563     |
| NM_006214    | PHYH         | 431   | 497   | 5.26509025241     |
| NM_031308    | EPPK1        | 12249 | 12342 | 10.2775374155     |
| NM_031308    | EPPK1        | 9982  | 10044 | 9.27753741529     |
| NM_031308    | EPPK1        | 14438 | 14471 | 9.27736366519     |
| NM_031308    | EPPK1        | 8042  | 8086  | 10.8624931852     |
| NM_031308    | EPPK1        | 12521 | 12608 | 9.27753741551     |
| NM_031308    | EPPK1        | 11454 | 11538 | 10.8624999162     |
| NM_031308    | EPPK1        | 11584 | 11646 | 9.27736366519     |
| NM_031308    | EPPK1        | 8608  | 8651  | 10.2773636652     |
| NM_031308    | EPPK1        | 4967  | 5004  | 10.1933982061     |
| NM_031308    | EPPK1        | 15004 | 15047 | 9.27753740796     |
| NM_031308    | EPPK1        | 13086 | 13147 | 10.8624999162     |
| NM_031308    | EPPK1        | 11237 | 11281 | 10.2775371796     |
| NM_031308    | EPPK1        | 15326 | 15385 | 10.2775374155     |
| NM_031308    | EPPK1        | 8776  | 8811  | 10.2735198153     |
| NM_031308    | EPPK1        | 5192  | 5262  | 10.8624999087     |
| NM_031308    | EPPK1        | 13571 | 13608 | 10.2775306845     |
| NM_031308    | EPPK1        | 9326  | 9413  | 10.8624999162     |
| NM_031308    | EPPK1        | 9635  | 9668  | 9.27753068446     |
| NM_031308    | EPPK1        | 13202 | 13250 | 9.27736366519     |
| NM_031308    | EPPK1        | 10212 | 10269 | 9.27736366519     |
| NM_031308    | EPPK1        | 7165  | 7236  | 10.2775374155     |
| NM_031308    | EPPK1        | 8652  | 8709  | 9.27351981534     |
| NM_031308    | EPPK1        | 12839 | 12883 | 10.2775374153     |
| NM_031308    | EPPK1        | 6781  | 6843  | 9.27351981534     |
| NM_031308    | EPPK1        | 14785 | 14847 | 9.27736366519     |
| NM_031308    | EPPK1        | 10609 | 10751 | 10.2775374155     |
| NM_031308    | EPPK1        | 8218  | 8331  | 11.2775374155     |
| NM_031308    | EPPK1        | 9016  | 9103  | 10.8624996803     |
| NM_031308    | EPPK1        | 8351  | 8453  | 10.2775374155     |
| NM_031308    | EPPK1        | 2115  | 2252  | 10.2775374155     |
| NM_031308    | EPPK1        | 15545 | 15681 | 10.8624999162     |



|              |         |       |       |               |
|--------------|---------|-------|-------|---------------|
| NM_031308    | EPPK1   | 7408  | 7550  | 10.2775374155 |
| NM_031308    | EPPK1   | 9852  | 9936  | 10.8624999162 |
| NM_031308    | EPPK1   | 5070  | 5153  | 10.2775374153 |
| NM_031308    | EPPK1   | 7004  | 7109  | 10.862499916  |
| NM_031308    | EPPK1   | 10446 | 10524 | 9.27753740796 |
| NM_031308    | EPPK1   | 13647 | 13730 | 9.27753741529 |
| NM_031308    | EPPK1   | 15201 | 15263 | 9.27736366519 |
| NM_031308    | EPPK1   | 12050 | 12128 | 9.27351981534 |
| NM_031308    | EPPK1   | 14614 | 14739 | 11.2775374155 |
| NM_031308    | EPPK1   | 11803 | 11910 | 9.27753741529 |
| NM_031308    | EPPK1   | 10367 | 10437 | 9.27753741551 |
| NM_031308    | EPPK1   | 13398 | 13514 | 10.2775374155 |
| NM_031308    | EPPK1   | 7719  | 7805  | 9.27753740796 |
| NM_018047    | RBM22   | 1579  | 1651  | 6.32927442706 |
| NM_018047    | RBM22   | 2204  | 2263  | 7.41341362889 |
| NM_018047    | RBM22   | 1540  | 1578  | 7.40939603627 |
| NM_018047    | RBM22   | 2035  | 2140  | 6.41341363622 |
| NM_018047    | RBM22   | 1058  | 1127  | 7.41341340052 |
| NM_031304    | DOHH    | 1216  | 1265  | 9.46771226583 |
| NM_031304    | DOHH    | 621   | 653   | 9.3835797875  |
| NM_031304    | DOHH    | 111   | 170   | 11.0526747665 |
| NM_031304    | DOHH    | 453   | 505   | 9.46771876096 |
| NM_031307    | PUS3    | 1072  | 1118  | 5.94982372884 |
| NM_031307    | PUS3    | 681   | 781   | 6.9499907481  |
| NM_001136040 | CPSF7   | 2598  | 2646  | 7.92315852585 |
| NM_001136040 | CPSF7   | 939   | 1000  | 7.92333204025 |
| NM_001136040 | CPSF7   | 83    | 207   | 7.92333227617 |
| NM_001136040 | CPSF7   | 801   | 842   | 6.33836953953 |
| NM_001136040 | CPSF7   | 3261  | 3309  | 6.33435217527 |
| NM_001136040 | CPSF7   | 2652  | 2722  | 8.33836977522 |
| NM_001136040 | CPSF7   | 589   | 652   | 6.3383697679  |
| NM_001136040 | CPSF7   | 702   | 796   | 8.66029787033 |
| NM_001136040 | CPSF7   | 1492  | 1625  | 7.33836977544 |
| NM_001136040 | CPSF7   | 3358  | 3395  | 6.25423056606 |
| NM_001136040 | CPSF7   | 2434  | 2485  | 7.33836953953 |
| NM_001136040 | CPSF7   | 2738  | 2829  | 7.92333227617 |
| NM_001136040 | CPSF7   | 3462  | 3527  | 7.3383697679  |
| NM_001136040 | CPSF7   | 2901  | 3070  | 7.92333227617 |
| NM_001136040 | CPSF7   | 2130  | 2210  | 7.33836977522 |
| NM_001130035 | PLEKHB1 | 1683  | 1740  | 6.97892320227 |
| NM_001130035 | PLEKHB1 | 800   | 885   | 7.05904481148 |
| NM_001136049 | LMLN    | 3943  | 4057  | 11.9516503346 |
| NM_001136049 | LMLN    | 4164  | 4287  | 11.9516570581 |
| NM_003489    | NRIP1   | 377   | 435   | 5.41685339902 |
| NM_003489    | NRIP1   | 4624  | 4692  | 6.42087099897 |
| NM_003489    | NRIP1   | 6560  | 6630  | 7.00583349991 |
| NM_003489    | NRIP1   | 442   | 513   | 7.00583349991 |
| NM_003489    | NRIP1   | 75    | 123   | 5.42087099897 |
| NM_003489    | NRIP1   | 2290  | 2347  | 7.00582676886 |
| NM_003489    | NRIP1   | 3664  | 3702  | 5.33673178981 |

|           |         |       |       |               |
|-----------|---------|-------|-------|---------------|
| NM_003489 | NRIP1   | 2846  | 2916  | 5.41685339902 |
| NM_003489 | NRIP1   | 1104  | 1135  | 5.33673178981 |
| NM_003489 | NRIP1   | 4174  | 4233  | 5.41685339902 |
| NM_003489 | NRIP1   | 1899  | 1986  | 6.42087099918 |
| NM_003489 | NRIP1   | 992   | 1047  | 5.42086426814 |
| NM_003489 | NRIP1   | 6405  | 6504  | 6.42087099897 |
| NM_003489 | NRIP1   | 692   | 766   | 6.42086426814 |
| NM_003489 | NRIP1   | 4954  | 5053  | 6.42087099919 |
| NM_003489 | NRIP1   | 5993  | 6113  | 7.42087099918 |
| NM_017911 | FAM118A | 2189  | 2240  | 6.27654235755 |
| NM_003482 | MLL2    | 16976 | 17048 | 6.91727912539 |
| NM_003482 | MLL2    | 163   | 213   | 7.9172788897  |
| NM_003482 | MLL2    | 8505  | 8549  | 6.9171053753  |
| NM_003482 | MLL2    | 14065 | 14109 | 6.91727239456 |
| NM_003482 | MLL2    | 1685  | 1731  | 7.91727912561 |
| NM_003482 | MLL2    | 16425 | 16495 | 7.91727911807 |
| NM_003482 | MLL2    | 16526 | 16637 | 7.91727912561 |
| NM_003482 | MLL2    | 5482  | 5550  | 6.9171053753  |
| NM_003482 | MLL2    | 3742  | 3832  | 9.2392072205  |
| NM_003482 | MLL2    | 9612  | 9717  | 8.91727912561 |
| NM_003482 | MLL2    | 7135  | 7228  | 6.91727912561 |
| NM_003482 | MLL2    | 6081  | 6147  | 7.91727911807 |
| NM_003482 | MLL2    | 14318 | 14373 | 7.91727911807 |
| NM_003482 | MLL2    | 2959  | 2999  | 6.9172788897  |
| NM_003482 | MLL2    | 2069  | 2134  | 7.91727912561 |
| NM_003482 | MLL2    | 18822 | 18904 | 6.91727912561 |
| NM_003482 | MLL2    | 3580  | 3641  | 6.91727912561 |
| NM_003482 | MLL2    | 569   | 651   | 8.50224162634 |
| NM_003482 | MLL2    | 8293  | 8392  | 8.50224162634 |
| NM_003482 | MLL2    | 3985  | 4044  | 8.50224139042 |
| NM_003482 | MLL2    | 1479  | 1559  | 6.9172788897  |
| NM_003482 | MLL2    | 9     | 72    | 7.9172788897  |
| NM_003482 | MLL2    | 17461 | 17562 | 7.91727912561 |
| NM_003482 | MLL2    | 15497 | 15542 | 6.91326152544 |
| NM_003482 | MLL2    | 14681 | 14754 | 8.91727239456 |
| NM_003482 | MLL2    | 2734  | 2794  | 6.83313991623 |
| NM_003482 | MLL2    | 16154 | 16237 | 7.9172788897  |
| NM_003482 | MLL2    | 8024  | 8088  | 7.91727911807 |
| NM_003482 | MLL2    | 9289  | 9353  | 6.91326152544 |
| NM_003482 | MLL2    | 12041 | 12113 | 7.91727911807 |
| NM_003482 | MLL2    | 8648  | 8703  | 7.91727912561 |
| NM_003482 | MLL2    | 975   | 1052  | 6.91727239456 |
| NM_003482 | MLL2    | 14389 | 14426 | 6.91326152544 |
| NM_003482 | MLL2    | 10484 | 10545 | 8.91727912561 |
| NM_003482 | MLL2    | 15207 | 15254 | 6.91326152544 |
| NM_003482 | MLL2    | 18585 | 18614 | 8.41810241695 |
| NM_003482 | MLL2    | 4046  | 4172  | 9.2392072205  |
| NM_003482 | MLL2    | 10962 | 11044 | 6.91326152544 |
| NM_003482 | MLL2    | 1583  | 1673  | 6.91727912561 |
| NM_003482 | MLL2    | 4568  | 4674  | 9.2392072205  |

|           |        |       |       |               |
|-----------|--------|-------|-------|---------------|
| NM_003482 | MLL2   | 6720  | 6798  | 7.91727912561 |
| NM_003482 | MLL2   | 655   | 937   | 11.0047419669 |
| NM_003482 | MLL2   | 5603  | 5752  | 10.0872041271 |
| NM_003482 | MLL2   | 18492 | 18582 | 7.91727912561 |
| NM_003482 | MLL2   | 17115 | 17259 | 11.0047419669 |
| NM_003482 | MLL2   | 2841  | 2938  | 6.9172788897  |
| NM_003482 | MLL2   | 2436  | 2490  | 7.83313991623 |
| NM_003482 | MLL2   | 4243  | 4406  | 9.72463404767 |
| NM_003482 | MLL2   | 8939  | 9272  | 10.6177188438 |
| NM_003482 | MLL2   | 3178  | 3269  | 6.91727912539 |
| NM_003482 | MLL2   | 18097 | 18196 | 7.91727912561 |
| NM_003482 | MLL2   | 1093  | 1158  | 7.9172788897  |
| NM_003483 | HMGA2  | 2609  | 2648  | 5.99909668315 |
| NM_003483 | HMGA2  | 2369  | 2412  | 4.99909668315 |
| NM_003483 | HMGA2  | 3764  | 3836  | 6.0031140474  |
| NM_003483 | HMGA2  | 1633  | 1676  | 5.00310755227 |
| NM_003483 | HMGA2  | 3428  | 3489  | 4.91897507394 |
| NM_003483 | HMGA2  | 2315  | 2352  | 5.91897507394 |
| NM_003483 | HMGA2  | 3884  | 4043  | 8.17303928476 |
| NM_003481 | USP5   | 2129  | 2189  | 6.94388790824 |
| NM_003481 | USP5   | 3010  | 3094  | 5.3589254073  |
| NM_003481 | USP5   | 1218  | 1260  | 5.35891867647 |
| NM_003481 | USP5   | 1028  | 1084  | 6.35891867647 |
| NM_003481 | USP5   | 2626  | 2678  | 6.35490780735 |
| NM_003481 | USP5   | 178   | 233   | 5.35892540752 |
| NM_003481 | USP5   | 2206  | 2327  | 7.94388790824 |
| NM_003481 | USP5   | 2328  | 2448  | 7.94388790824 |
| NM_003481 | USP5   | 805   | 898   | 7.94388790824 |
| NM_003481 | USP5   | 908   | 1005  | 7.68085350241 |
| NM_003481 | USP5   | 387   | 500   | 7.94388790824 |
| NM_003481 | USP5   | 1987  | 2013  | 5.35490780735 |
| NM_003481 | USP5   | 596   | 787   | 8.68085350241 |
| NM_003481 | USP5   | 1708  | 1849  | 7.35892540752 |
| NM_003481 | USP5   | 1102  | 1195  | 6.94388790824 |
| NM_003481 | USP5   | 1279  | 1435  | 6.94388790824 |
| NM_003486 | SLC7A5 | 3411  | 3471  | 6.29392398742 |
| NM_003486 | SLC7A5 | 1456  | 1524  | 7.29392398742 |
| NM_003486 | SLC7A5 | 4469  | 4509  | 5.28990638747 |
| NM_003486 | SLC7A5 | 778   | 808   | 5.29375023733 |
| NM_003486 | SLC7A5 | 3196  | 3258  | 6.87888648836 |
| NM_003486 | SLC7A5 | 3859  | 3901  | 7.28990638747 |
| NM_003486 | SLC7A5 | 1388  | 1429  | 5.29392375172 |
| NM_003486 | SLC7A5 | 2353  | 2396  | 7.29375023733 |
| NM_003486 | SLC7A5 | 1221  | 1328  | 9.1012789097  |
| NM_003486 | SLC7A5 | 922   | 958   | 6.29391725659 |
| NM_003486 | SLC7A5 | 4360  | 4458  | 7.87888648836 |
| NM_003486 | SLC7A5 | 1332  | 1378  | 6.28990638747 |
| NM_003486 | SLC7A5 | 4249  | 4295  | 6.79474727898 |
| NM_003486 | SLC7A5 | 2588  | 2665  | 5.28990638747 |
| NM_003486 | SLC7A5 | 583   | 637   | 6.28990638747 |

|           |        |      |      |               |
|-----------|--------|------|------|---------------|
| NM_003486 | SLC7A5 | 344  | 457  | 6.29392398764 |
| NM_003486 | SLC7A5 | 4043 | 4132 | 7.29392398764 |
| NM_003486 | SLC7A5 | 3615 | 3715 | 7.61585208253 |
| NM_003486 | SLC7A5 | 1886 | 1953 | 5.28990638747 |
| NM_003486 | SLC7A5 | 3743 | 3847 | 7.29392398764 |
| NM_003486 | SLC7A5 | 1725 | 1792 | 5.29392398764 |
| NM_003486 | SLC7A5 | 1972 | 2157 | 7.29392398764 |
| NM_003486 | SLC7A5 | 959  | 1125 | 8.29392398764 |
| NM_003486 | SLC7A5 | 823  | 901  | 5.29392375172 |
| NM_003487 | TAF15  | 109  | 170  | 6.20515628248 |
| NM_003487 | TAF15  | 213  | 274  | 7.20515628249 |
| NM_003487 | TAF15  | 1119 | 1159 | 4.62019354585 |
| NM_003487 | TAF15  | 1175 | 1235 | 5.62018705071 |
| NM_003487 | TAF15  | 806  | 946  | 7.20515628249 |
| NM_003487 | TAF15  | 1708 | 1748 | 4.53605457238 |
| NM_003487 | TAF15  | 1001 | 1035 | 4.61617618159 |
| NM_003487 | TAF15  | 714  | 782  | 5.62019377421 |
| NM_003487 | TAF15  | 1818 | 1939 | 7.42754870382 |
| NM_003487 | TAF15  | 1940 | 2024 | 5.62019378176 |
| NM_014608 | CYFIP1 | 3941 | 4032 | 7.12887977884 |
| NM_014608 | CYFIP1 | 3571 | 3692 | 8.93623470089 |
| NM_014608 | CYFIP1 | 230  | 309  | 6.12887977129 |
| NM_014608 | CYFIP1 | 1111 | 1176 | 7.12887977883 |
| NM_014608 | CYFIP1 | 925  | 1005 | 8.12887977884 |
| NM_014608 | CYFIP1 | 2554 | 2617 | 7.12887977884 |
| NM_014608 | CYFIP1 | 1497 | 1542 | 7.12870602852 |
| NM_014608 | CYFIP1 | 3032 | 3115 | 7.71384227933 |
| NM_014608 | CYFIP1 | 2460 | 2554 | 8.12887977884 |
| NM_014608 | CYFIP1 | 758  | 818  | 7.12887954292 |
| NM_014608 | CYFIP1 | 1897 | 1953 | 7.12870602852 |
| NM_014608 | CYFIP1 | 470  | 517  | 7.71384227201 |
| NM_014608 | CYFIP1 | 1403 | 1458 | 6.12486217866 |
| NM_014608 | CYFIP1 | 2798 | 2877 | 7.71384227956 |
| NM_014608 | CYFIP1 | 3476 | 3542 | 6.12887304778 |
| NM_014608 | CYFIP1 | 2652 | 2773 | 8.71384227956 |
| NM_014608 | CYFIP1 | 3274 | 3346 | 7.70982467938 |
| NM_014608 | CYFIP1 | 1639 | 1721 | 7.12887977884 |
| NM_014608 | CYFIP1 | 2925 | 3007 | 7.71384227956 |
| NM_014608 | CYFIP1 | 821  | 914  | 8.71384227955 |
| NM_014608 | CYFIP1 | 549  | 682  | 9.12887977884 |
| NM_014608 | CYFIP1 | 2316 | 2459 | 7.12887977884 |
| NM_014602 | PIK3R4 | 2253 | 2305 | 9.18664986123 |
| NM_014602 | PIK3R4 | 3689 | 3738 | 7.60168063701 |
| NM_014602 | PIK3R4 | 1127 | 1195 | 9.18263226861 |
| NM_014602 | PIK3R4 | 602  | 663  | 8.60168063701 |
| NM_014602 | PIK3R4 | 4757 | 4815 | 9.18263226861 |
| NM_014602 | PIK3R4 | 1995 | 2082 | 7.60168736051 |
| NM_014602 | PIK3R4 | 2321 | 2385 | 8.60168736806 |
| NM_014602 | PIK3R4 | 4114 | 4168 | 9.18664963286 |
| NM_014602 | PIK3R4 | 4295 | 4371 | 8.60168736806 |

|           |         |      |      |               |
|-----------|---------|------|------|---------------|
| NM_014602 | PIK3R4  | 1707 | 1738 | 7.59766976789 |
| NM_014602 | PIK3R4  | 2473 | 2554 | 8.60168736806 |
| NM_014602 | PIK3R4  | 266  | 309  | 8.60151361774 |
| NM_014602 | PIK3R4  | 1304 | 1414 | 9.60168736806 |
| NM_014602 | PIK3R4  | 3015 | 3077 | 9.18647611846 |
| NM_014602 | PIK3R4  | 3573 | 3614 | 8.51754815868 |
| NM_014602 | PIK3R4  | 923  | 1024 | 7.60168736784 |
| NM_014602 | PIK3R4  | 1799 | 1917 | 8.60168736784 |
| NM_014602 | PIK3R4  | 3834 | 3920 | 10.1866498688 |
| NM_014602 | PIK3R4  | 4590 | 4650 | 8.51754815868 |
| NM_014602 | PIK3R4  | 2638 | 2797 | 11.1866498688 |
| NM_014603 | CDR2L   | 467  | 505  | 9.14265112937 |
| NM_014603 | CDR2L   | 3275 | 3379 | 9.22679033874 |
| NM_014604 | TAX1BP3 | 175  | 242  | 6.91555853338 |
| NM_014604 | TAX1BP3 | 711  | 780  | 7.91957613355 |
| NM_014604 | TAX1BP3 | 1260 | 1299 | 6.91555853338 |
| NM_014604 | TAX1BP3 | 1084 | 1199 | 9.62001585169 |
| NM_014604 | TAX1BP3 | 489  | 634  | 9.62001585169 |
| NM_014604 | TAX1BP3 | 246  | 419  | 8.91957613355 |
| NM_014607 | UBXN4   | 3836 | 3893 | 4.18428827873 |
| NM_014607 | UBXN4   | 1875 | 1959 | 5.50621637361 |
| NM_014607 | UBXN4   | 1521 | 1591 | 4.76925077945 |
| NM_014607 | UBXN4   | 1748 | 1794 | 3.18428827118 |
| NM_014607 | UBXN4   | 3331 | 3375 | 3.18428154767 |
| NM_014607 | UBXN4   | 3437 | 3485 | 4.18027067855 |
| NM_014607 | UBXN4   | 2696 | 2748 | 4.10014906934 |
| NM_014607 | UBXN4   | 1346 | 1397 | 4.18428827118 |
| NM_014607 | UBXN4   | 2506 | 2557 | 5.18428804281 |
| NM_014607 | UBXN4   | 524  | 607  | 5.18428804281 |
| NM_014607 | UBXN4   | 3103 | 3161 | 4.18428827873 |
| NM_014607 | UBXN4   | 707  | 795  | 5.76925077945 |
| NM_014607 | UBXN4   | 2147 | 2193 | 3.10014906934 |
| NM_014607 | UBXN4   | 2592 | 2641 | 4.18027067855 |
| NM_014607 | UBXN4   | 1423 | 1503 | 5.18428827873 |
| NM_014607 | UBXN4   | 2205 | 2388 | 5.50621637361 |
| NM_014607 | UBXN4   | 2398 | 2503 | 5.99164320078 |
| NM_014607 | UBXN4   | 1966 | 2112 | 4.76925077945 |
| NM_014607 | UBXN4   | 1618 | 1743 | 5.50621637361 |
| NM_014607 | UBXN4   | 1222 | 1323 | 4.76925077944 |
| NM_005880 | DNAJA2  | 934  | 971  | 2.89461073235 |
| NM_005880 | DNAJA2  | 416  | 480  | 1.89461073235 |
| NM_005880 | DNAJA2  | 625  | 729  | 3.89461073235 |
| NM_005881 | BCKDK   | 747  | 814  | 7.6424596727  |
| NM_005881 | BCKDK   | 895  | 961  | 6.64647054182 |
| NM_005881 | BCKDK   | 613  | 678  | 7.64630352256 |
| NM_005881 | BCKDK   | 194  | 273  | 6.64647727288 |
| NM_005885 | MARCH6  | 733  | 772  | 5.14347860048 |
| NM_005885 | MARCH6  | 3145 | 3196 | 8.31340383784 |
| NM_005885 | MARCH6  | 6498 | 6553 | 6.72844132957 |
| NM_005885 | MARCH6  | 3472 | 3541 | 5.14347210535 |

|              |         |      |      |               |
|--------------|---------|------|------|---------------|
| NM_005885    | MARCH6  | 6270 | 6328 | 5.13946123623 |
| NM_005885    | MARCH6  | 3611 | 3658 | 7.05933962702 |
| NM_005885    | MARCH6  | 1188 | 1250 | 7.95083375846 |
| NM_005885    | MARCH6  | 6104 | 6150 | 6.05933962702 |
| NM_005885    | MARCH6  | 4181 | 4249 | 5.14347210535 |
| NM_005885    | MARCH6  | 6205 | 6270 | 6.7284411012  |
| NM_005885    | MARCH6  | 6709 | 6779 | 7.1434788364  |
| NM_005885    | MARCH6  | 5358 | 5428 | 6.72844133712 |
| NM_005885    | MARCH6  | 3009 | 3142 | 9.1434788364  |
| NM_005885    | MARCH6  | 595  | 725  | 9.23094167765 |
| NM_005885    | MARCH6  | 5194 | 5256 | 5.14347210535 |
| NM_005885    | MARCH6  | 921  | 1182 | 10.0014598315 |
| NM_005885    | MARCH6  | 6355 | 6404 | 5.13946123623 |
| NM_005885    | MARCH6  | 261  | 355  | 8.31340383784 |
| NM_005885    | MARCH6  | 1669 | 2034 | 10.7873350262 |
| NM_005885    | MARCH6  | 3892 | 4061 | 7.72844133712 |
| NM_005885    | MARCH6  | 109  | 199  | 5.14347860048 |
| NM_005885    | MARCH6  | 3222 | 3359 | 8.31340383784 |
| NM_005885    | MARCH6  | 366  | 439  | 7.1434788364  |
| NM_005885    | MARCH6  | 2123 | 2997 | 12.3134038378 |
| NM_005885    | MARCH6  | 1262 | 1658 | 11.5357962592 |
| NM_005885    | MARCH6  | 463  | 592  | 9.31340383784 |
| NM_005558    | LAD1    | 351  | 408  | 6.00795704919 |
| NM_005558    | LAD1    | 1214 | 1263 | 7.00795728511 |
| NM_005558    | LAD1    | 637  | 686  | 7.00795055406 |
| NM_005558    | LAD1    | 2190 | 2229 | 7.00795704919 |
| NM_005558    | LAD1    | 1527 | 1559 | 5.92381807573 |
| NM_005558    | LAD1    | 2296 | 2352 | 8.32988537245 |
| NM_005558    | LAD1    | 1709 | 1813 | 8.59291978583 |
| NM_005558    | LAD1    | 2363 | 2454 | 7.00795728511 |
| NM_005558    | LAD1    | 231  | 332  | 7.59291978583 |
| NM_005558    | LAD1    | 1862 | 2007 | 8.59291978583 |
| NM_005558    | LAD1    | 1367 | 1517 | 8.81531220717 |
| NM_005558    | LAD1    | 1604 | 1657 | 5.92381807573 |
| NM_005558    | LAD1    | 2061 | 2168 | 8.00795728511 |
| NM_003730    | RNASET2 | 556  | 613  | 2.2080468397  |
| NM_003730    | RNASET2 | 972  | 1036 | 2.79702694059 |
| NM_001145468 | SPECC1L | 3454 | 3534 | 5.13676397563 |
| NM_001145468 | SPECC1L | 1532 | 1611 | 5.7217197453  |
| NM_001145468 | SPECC1L | 2934 | 3004 | 5.72172647635 |
| NM_001145468 | SPECC1L | 1189 | 1258 | 4.13676397563 |
| NM_001145468 | SPECC1L | 5925 | 5971 | 4.13274637546 |
| NM_001145468 | SPECC1L | 2776 | 2840 | 4.13659022531 |
| NM_001145468 | SPECC1L | 3534 | 3580 | 4.13675724458 |
| NM_001145468 | SPECC1L | 2137 | 2251 | 5.13676397563 |
| NM_001145468 | SPECC1L | 3383 | 3443 | 5.13676396808 |
| NM_001145468 | SPECC1L | 1111 | 1171 | 4.13274637546 |
| NM_001145468 | SPECC1L | 6086 | 6144 | 5.71770887618 |
| NM_001145468 | SPECC1L | 5352 | 5448 | 6.13676397563 |
| NM_001145468 | SPECC1L | 3821 | 3956 | 7.13676397563 |

|              |         |      |      |                |
|--------------|---------|------|------|----------------|
| NM_001145468 | SPECC1L | 984  | 1036 | 5.13274637546  |
| NM_001145468 | SPECC1L | 4747 | 4930 | 6.72172647635  |
| NM_001145468 | SPECC1L | 4433 | 4535 | 5.72172647635  |
| NM_001145461 | YIF1B   | 632  | 678  | 7.91208868835  |
| NM_001145461 | YIF1B   | 516  | 553  | 8.58101664814  |
| NM_001145461 | YIF1B   | 797  | 849  | 8.58119039846  |
| NM_001145461 | YIF1B   | 709  | 795  | 9.31815599262  |
| NM_001145461 | YIF1B   | 316  | 405  | 9.3181559924   |
| NM_001145461 | YIF1B   | 420  | 512  | 8.58119039091  |
| NM_003739    | AKR1C3  | 700  | 731  | 1.35903121331  |
| NM_003739    | AKR1C3  | 847  | 940  | 3.35903794436  |
| NM_003739    | AKR1C3  | 567  | 613  | 2.35886419404  |
| NM_003739    | AKR1C3  | 216  | 327  | 4.68096603925  |
| NM_003739    | AKR1C3  | 746  | 840  | 2.35903794436  |
| NM_001008800 | CCT3    | 1773 | 1863 | 4.72114354396  |
| NM_001008800 | CCT3    | 1447 | 1740 | 6.44360956844  |
| NM_001008800 | CCT3    | 327  | 467  | 5.48667829033  |
| NM_001008800 | CCT3    | 142  | 319  | 5.56914045052  |
| NM_001008800 | CCT3    | 1879 | 1946 | 4.39921544908  |
| NM_001008800 | CCT3    | 483  | 789  | 6.2571964442   |
| NM_001008800 | CCT3    | 1066 | 1444 | 6.95380430075  |
| NM_001008800 | CCT3    | 791  | 1064 | 6.15410295124  |
| NM_000477    | ALB     | 2181 | 2234 | -3.88980816658 |
| NM_000477    | ALB     | 28   | 2107 | 5.2187162902   |
| NM_000477    | ALB     | 2114 | 2169 | -2.30484566585 |
| NM_032775    | KLHL22  | 573  | 726  | 11.0568204362  |
| NM_032775    | KLHL22  | 1623 | 1696 | 11.052802836   |
| NM_032775    | KLHL22  | 1978 | 2075 | 10.4718579279  |
| NM_005088    | AKAP17A | 555  | 620  | 7.40671781712  |
| NM_005089    | ZRSR2   | 651  | 721  | 6.66569307757  |
| NM_005080    | XBP1    | 1717 | 1786 | 5.25771935337  |
| NM_005080    | XBP1    | 1505 | 1562 | 3.87920773011  |
| NM_005080    | XBP1    | 14   | 62   | 3.14206838563  |
| NM_005080    | XBP1    | 1601 | 1694 | 3.55727963523  |
| NM_005080    | XBP1    | 744  | 1047 | 6.31216713739  |
| NM_005080    | XBP1    | 1048 | 1292 | 6.76673300085  |
| NM_005080    | XBP1    | 1311 | 1371 | 3.14224213595  |
| NM_005080    | XBP1    | 252  | 583  | 5.80520714867  |
| NM_005080    | XBP1    | 1381 | 1456 | 3.87920773011  |
| NM_005080    | XBP1    | 586  | 741  | 6.31216713739  |
| NM_052885    | SLC2A13 | 1420 | 1459 | 8.79790568219  |
| NM_052885    | SLC2A13 | 848  | 908  | 7.79807943251  |
| NM_052885    | SLC2A13 | 1367 | 1413 | 10.1200075198  |
| NM_052885    | SLC2A13 | 1317 | 1363 | 7.79790568219  |
| NM_052885    | SLC2A13 | 1936 | 1990 | 7.79406183234  |
| NM_052885    | SLC2A13 | 561  | 603  | 8.71394022312  |
| NM_052885    | SLC2A13 | 1762 | 1918 | 10.7980794325  |
| NM_052885    | SLC2A13 | 1549 | 1702 | 9.79807943251  |
| NM_005082    | TRIM25  | 2884 | 2951 | 6.4732286834   |
| NM_005082    | TRIM25  | 715  | 790  | 6.4732289191   |

|           |        |      |      |               |
|-----------|--------|------|------|---------------|
| NM_005082 | TRIM25 | 2354 | 2394 | 4.80412720922 |
| NM_005082 | TRIM25 | 1260 | 1321 | 5.88825968755 |
| NM_005082 | TRIM25 | 2430 | 2490 | 6.88826641105 |
| NM_005082 | TRIM25 | 4469 | 4517 | 6.46921131915 |
| NM_005085 | NUP214 | 1152 | 1222 | 10.2890472176 |
| NM_005085 | NUP214 | 1967 | 2021 | 8.28502961747 |
| NM_005085 | NUP214 | 837  | 896  | 8.28904721764 |
| NM_005085 | NUP214 | 1254 | 1347 | 8.28904721764 |
| NM_005085 | NUP214 | 2331 | 2403 | 10.2049080083 |
| NM_005085 | NUP214 | 151  | 218  | 8.28904721742 |
| NM_005085 | NUP214 | 2612 | 2668 | 9.87400298731 |
| NM_005085 | NUP214 | 1570 | 1675 | 8.28904721763 |
| NM_005085 | NUP214 | 3070 | 3157 | 9.87400971836 |
| NM_014462 | LSM1   | 873  | 916  | 3.82919058635 |
| NM_014462 | LSM1   | 598  | 674  | 5.41014221795 |
| NM_014463 | LSM3   | 441  | 527  | 2.71993023491 |
| NM_014463 | LSM3   | 275  | 354  | 4.04185833735 |
| NM_014463 | LSM3   | 212  | 270  | 2.71992351141 |
| NM_005776 | CNIH   | 590  | 676  | 3.63953093614 |
| NM_005776 | CNIH   | 1345 | 1416 | 3.15410410897 |
| NM_005776 | CNIH   | 679  | 751  | 4.00210101552 |
| NM_005776 | CNIH   | 1273 | 1320 | 2.41696476448 |
| NM_005776 | CNIH   | 928  | 1012 | 2.83217601408 |
| NM_005776 | CNIH   | 756  | 921  | 4.91963885533 |
| NM_005776 | CNIH   | 104  | 570  | 6.73906660969 |
| NM_152341 | PAQR4  | 1789 | 1843 | 11.1127388299 |
| NM_152341 | PAQR4  | 1653 | 1729 | 11.6977013306 |
| NM_152341 | PAQR4  | 534  | 629  | 10.1968780393 |
| NM_152341 | PAQR4  | 821  | 862  | 10.1968780317 |
| NM_152341 | PAQR4  | 355  | 424  | 10.1928604391 |
| NM_152341 | PAQR4  | 1052 | 1150 | 11.78184054   |
| NM_152341 | PAQR4  | 1491 | 1579 | 11.78184054   |
| NM_152341 | PAQR4  | 754  | 810  | 10.1928604391 |
| NM_152341 | PAQR4  | 1356 | 1486 | 13.3668030407 |
| NM_032303 | HSDL2  | 1860 | 1918 | 4.8367954328  |
| NM_032303 | HSDL2  | 1470 | 1554 | 2.83680216363 |
| NM_032303 | HSDL2  | 1228 | 1307 | 4.83680216385 |
| NM_032303 | HSDL2  | 1669 | 1732 | 3.83662841353 |
| NM_032303 | HSDL2  | 600  | 649  | 3.83680192793 |
| NM_032303 | HSDL2  | 1337 | 1391 | 2.8367954328  |
| NM_032303 | HSDL2  | 1138 | 1226 | 5.15873025874 |
| NM_032303 | HSDL2  | 3174 | 3265 | 3.83278456368 |
| NM_032302 | PSMG3  | 1326 | 1362 | 7.37221897066 |
| NM_032302 | PSMG3  | 843  | 934  | 7.37623657084 |
| NM_032302 | PSMG3  | 1240 | 1296 | 7.37221897066 |
| NM_032302 | PSMG3  | 410  | 484  | 7.37622983978 |
| NM_152344 | LSM12  | 820  | 870  | 5.47763312787 |
| NM_152344 | LSM12  | 1541 | 1613 | 5.47763985892 |
| NM_152344 | LSM12  | 1722 | 1794 | 5.4774661086  |
| NM_152344 | LSM12  | 1936 | 1984 | 5.39350064954 |



|              |         |      |      |               |
|--------------|---------|------|------|---------------|
| NM_152344    | LSM12   | 297  | 380  | 5.47763985137 |
| NM_152344    | LSM12   | 1196 | 1258 | 4.4774661086  |
| NM_152344    | LSM12   | 2087 | 2156 | 4.47763312787 |
| NM_152617    | RNF168  | 5150 | 5182 | 6.72703277836 |
| NM_152617    | RNF168  | 3884 | 3961 | 6.81116525669 |
| NM_152617    | RNF168  | 3583 | 3638 | 6.81116525669 |
| NM_152617    | RNF168  | 3644 | 3717 | 6.8111719802  |
| NM_152617    | RNF168  | 3779 | 3861 | 6.80715438757 |
| NM_152617    | RNF168  | 366  | 492  | 9.39613448847 |
| NM_152346    | SLC43A2 | 1843 | 1882 | 7.23961923666 |
| NM_152346    | SLC43A2 | 1701 | 1744 | 6.23945221739 |
| NM_152346    | SLC43A2 | 224  | 285  | 6.23560836754 |
| NM_152346    | SLC43A2 | 1236 | 1341 | 6.23560836754 |
| NM_152346    | SLC43A2 | 1439 | 1507 | 6.15548675833 |
| NM_152346    | SLC43A2 | 2506 | 2557 | 7.23945221739 |
| NM_152346    | SLC43A2 | 1513 | 1636 | 7.23962596771 |
| NM_152346    | SLC43A2 | 744  | 846  | 7.82458846843 |
| NM_032309    | CHCHD5  | 177  | 234  | 8.0695742553  |
| NM_032656    | DHX37   | 426  | 468  | 6.1934671135  |
| NM_032656    | DHX37   | 2991 | 3035 | 7.27743257257 |
| NM_032656    | DHX37   | 1091 | 1208 | 7.27760632289 |
| NM_032656    | DHX37   | 312  | 359  | 6.27358872271 |
| NM_032656    | DHX37   | 3769 | 3887 | 8.59953441777 |
| NM_032656    | DHX37   | 2116 | 2182 | 7.27760632266 |
| NM_032656    | DHX37   | 1912 | 2021 | 6.27760632289 |
| NM_005778    | RBM5    | 1565 | 1624 | 4.41217439892 |
| NM_005779    | LHFPL2  | 3969 | 4040 | 8.96195193238 |
| NM_005779    | LHFPL2  | 612  | 666  | 9.80994884648 |
| NM_005779    | LHFPL2  | 2313 | 2385 | 6.64001711398 |
| NM_005779    | LHFPL2  | 4066 | 4139 | 6.64002384503 |
| NM_005779    | LHFPL2  | 1255 | 1293 | 8.22498610984 |
| NM_005779    | LHFPL2  | 2147 | 2199 | 7.63985009472 |
| NM_005779    | LHFPL2  | 1054 | 1098 | 6.64002360912 |
| NM_005779    | LHFPL2  | 4732 | 4775 | 7.64002360912 |
| NM_005779    | LHFPL2  | 2394 | 2443 | 6.63985009472 |
| NM_005779    | LHFPL2  | 3830 | 3891 | 6.63985009472 |
| NM_005354    | JUND    | 417  | 512  | 6.46891408799 |
| NM_005354    | JUND    | 243  | 344  | 6.88395158727 |
| NM_005354    | JUND    | 1395 | 1417 | 4.79981237789 |
| NM_005354    | JUND    | 1590 | 1725 | 7.69130650933 |
| NM_005354    | JUND    | 173  | 224  | 4.88395158727 |
| NM_005354    | JUND    | 806  | 934  | 6.46891408799 |
| NM_005354    | JUND    | 1046 | 1111 | 6.46891408799 |
| NM_005354    | JUND    | 1447 | 1549 | 4.88395158727 |
| NM_005354    | JUND    | 1728 | 1914 | 8.05387658872 |
| NM_001037675 | NBPF9   | 751  | 806  | 7.15111244554 |
| NM_001037675 | NBPF9   | 4180 | 4255 | 7.23525165492 |
| NM_001037675 | NBPF9   | 2210 | 2261 | 9.23525165492 |
| NM_001037675 | NBPF9   | 1782 | 1833 | 7.23123405475 |
| NM_001037675 | NBPF9   | 1993 | 2056 | 9.55717974981 |

|              |         |       |       |               |
|--------------|---------|-------|-------|---------------|
| NM_001037675 | NBPF9   | 4021  | 4107  | 8.82021414809 |
| NM_001037675 | NBPF9   | 2511  | 2568  | 7.23525164737 |
| NM_001037675 | NBPF9   | 818   | 863   | 7.23123405475 |
| NM_001037675 | NBPF9   | 4280  | 4384  | 9.23525165492 |
| NM_001037675 | NBPF9   | 1318  | 1359  | 7.23123405475 |
| NM_001037675 | NBPF9   | 1865  | 1919  | 7.23524492387 |
| NM_001037675 | NBPF9   | 3315  | 3433  | 7.23525165492 |
| NM_018389    | SLC35C1 | 1238  | 1283  | 8.60701905012 |
| NM_018389    | SLC35C1 | 1537  | 1594  | 8.60701905012 |
| NM_018388    | MBNL3   | 5103  | 5186  | 3.61027650164 |
| NM_018388    | MBNL3   | 5243  | 5307  | 3.025313765   |
| NM_018388    | MBNL3   | 6994  | 7081  | 3.61027650164 |
| NM_018388    | MBNL3   | 5025  | 5062  | 2.94117479153 |
| NM_018388    | MBNL3   | 5313  | 5368  | 4.83266892298 |
| NM_018388    | MBNL3   | 1983  | 2026  | 2.02129640075 |
| NM_018388    | MBNL3   | 1055  | 1090  | 3.02129640075 |
| NM_018388    | MBNL3   | 5369  | 5482  | 3.61027650164 |
| NM_018388    | MBNL3   | 1098  | 1164  | 3.02531400092 |
| NM_018388    | MBNL3   | 1742  | 1834  | 5.02531400092 |
| NM_018388    | MBNL3   | 5907  | 5968  | 3.61027650164 |
| NM_018388    | MBNL3   | 5973  | 6088  | 3.02531400092 |
| NM_018388    | MBNL3   | 6108  | 6152  | 3.025313765   |
| NM_018388    | MBNL3   | 7569  | 7632  | 4.02531399337 |
| NM_018388    | MBNL3   | 10038 | 10085 | 2.02530726986 |
| NM_018388    | MBNL3   | 2285  | 2338  | 4.02531400091 |
| NM_018388    | MBNL3   | 4824  | 4871  | 2.02530726986 |
| NM_018388    | MBNL3   | 9698  | 9738  | 1.94117479153 |
| NM_018388    | MBNL3   | 7468  | 7521  | 4.02531400091 |
| NM_018388    | MBNL3   | 1856  | 1885  | 2.0251402506  |
| NM_018388    | MBNL3   | 8207  | 8281  | 3.02531400091 |
| NM_018388    | MBNL3   | 414   | 460   | 4.02531400092 |
| NM_018388    | MBNL3   | 3891  | 3970  | 3.02531400091 |
| NM_018388    | MBNL3   | 2787  | 2842  | 2.02129640075 |
| NM_018388    | MBNL3   | 765   | 824   | 3.02530726986 |
| NM_018388    | MBNL3   | 7673  | 7785  | 3.61027650164 |
| NM_018388    | MBNL3   | 4614  | 4671  | 4.02531400092 |
| NM_018388    | MBNL3   | 3374  | 3481  | 4.61027650164 |
| NM_018388    | MBNL3   | 8426  | 8540  | 3.61027650164 |
| NM_018388    | MBNL3   | 3504  | 3591  | 2.02531400092 |
| NM_018388    | MBNL3   | 857   | 989   | 5.02531400092 |
| NM_018388    | MBNL3   | 1562  | 1737  | 5.61027650164 |
| NM_018388    | MBNL3   | 1477  | 1549  | 3.025313765   |
| NM_018388    | MBNL3   | 6181  | 6318  | 4.02531400092 |
| NM_018388    | MBNL3   | 7794  | 7880  | 2.02531399337 |
| NM_018388    | MBNL3   | 4526  | 4597  | 4.61027650164 |
| NM_018388    | MBNL3   | 8583  | 8716  | 4.02531400092 |
| NM_018388    | MBNL3   | 6852  | 6959  | 3.61027650164 |
| NM_018388    | MBNL3   | 2059  | 2171  | 3.61027650164 |
| NM_018388    | MBNL3   | 3598  | 3837  | 5.19523900236 |
| NM_018388    | MBNL3   | 300   | 398   | 4.34724209581 |

|              |       |      |      |               |
|--------------|-------|------|------|---------------|
| NM_018388    | MBNL3 | 5576 | 5657 | 3.61027650142 |
| NM_018388    | MBNL3 | 8003 | 8191 | 5.02531400092 |
| NM_018388    | MBNL3 | 3296 | 3373 | 3.61027650164 |
| NM_018388    | MBNL3 | 2344 | 2573 | 5.48474561956 |
| NM_018388    | MBNL3 | 477  | 628  | 5.34724209581 |
| NM_018388    | MBNL3 | 631  | 764  | 5.72575371906 |
| NM_018388    | MBNL3 | 4914 | 5025 | 3.02531400092 |
| NM_018388    | MBNL3 | 3015 | 3198 | 5.19523900236 |
| NM_018388    | MBNL3 | 7366 | 7468 | 3.02531400092 |
| NM_018388    | MBNL3 | 2597 | 2719 | 4.83266892298 |
| NM_018388    | MBNL3 | 5726 | 5875 | 4.02531400092 |
| NM_018383    | WDR33 | 4134 | 4179 | 6.01204516786 |
| NM_018383    | WDR33 | 260  | 303  | 6.01588901772 |
| NM_018383    | WDR33 | 3738 | 3814 | 7.01606276804 |
| NM_018383    | WDR33 | 3222 | 3284 | 5.01606276803 |
| NM_018383    | WDR33 | 1107 | 1163 | 7.01606276049 |
| NM_018383    | WDR33 | 2780 | 2823 | 4.93192355865 |
| NM_018383    | WDR33 | 595  | 666  | 5.01606253212 |
| NM_018383    | WDR33 | 1425 | 1477 | 5.01588901772 |
| NM_018383    | WDR33 | 842  | 897  | 7.01588901772 |
| NM_018383    | WDR33 | 336  | 413  | 6.6010185377  |
| NM_018383    | WDR33 | 1513 | 1585 | 5.01606253212 |
| NM_018383    | WDR33 | 901  | 1049 | 7.01606276804 |
| NM_018383    | WDR33 | 680  | 771  | 6.01204516786 |
| NM_018385    | LSG1  | 2257 | 2319 | 6.69435264621 |
| NM_018385    | LSG1  | 3412 | 3501 | 5.10939014549 |
| NM_018385    | LSG1  | 3335 | 3362 | 6.69033504604 |
| NM_018385    | LSG1  | 3222 | 3260 | 5.10938990957 |
| NM_018385    | LSG1  | 1807 | 1897 | 7.69435264621 |
| NM_018385    | LSG1  | 1915 | 1955 | 5.02525093611 |
| NM_018385    | LSG1  | 1674 | 1778 | 6.69435264621 |
| NM_018385    | LSG1  | 3068 | 3169 | 6.69435264621 |
| NM_018385    | LSG1  | 1310 | 1371 | 5.10938990957 |
| NM_018385    | LSG1  | 370  | 547  | 8.27931514694 |
| NM_018385    | LSG1  | 645  | 983  | 8.91674506755 |
| NM_018385    | LSG1  | 2068 | 2176 | 7.10939014549 |
| NM_018385    | LSG1  | 1453 | 1658 | 8.56882176413 |
| NM_018385    | LSG1  | 556  | 628  | 6.69434591516 |
| NM_018385    | LSG1  | 2806 | 2908 | 6.69435264599 |
| NM_018385    | LSG1  | 1131 | 1308 | 7.91674506755 |
| NM_018387    | STRBP | 966  | 1027 | 6.61988073277 |
| NM_018387    | STRBP | 677  | 756  | 5.61987423764 |
| NM_001025205 | AP2M1 | 626  | 719  | 5.91017658155 |
| NM_001025205 | AP2M1 | 361  | 443  | 5.91017658155 |
| NM_001025205 | AP2M1 | 1669 | 1740 | 5.10282165949 |
| NM_001025205 | AP2M1 | 868  | 997  | 6.42474975438 |
| NM_001025205 | AP2M1 | 1069 | 1141 | 3.10282165949 |
| NM_001025205 | AP2M1 | 754  | 861  | 4.10282142357 |
| NM_001025205 | AP2M1 | 444  | 568  | 5.91017658155 |
| NM_001025205 | AP2M1 | 1828 | 1906 | 3.10282165949 |

|              |         |      |      |               |
|--------------|---------|------|------|---------------|
| NM_001025205 | AP2M1   | 51   | 169  | 5.10282165949 |
| NM_020944    | GBA2    | 1002 | 1052 | 5.89539514478 |
| NM_020944    | GBA2    | 2737 | 2841 | 7.8955688951  |
| NM_020944    | GBA2    | 3247 | 3329 | 6.89556889488 |
| NM_020944    | GBA2    | 1939 | 2035 | 5.8955688951  |
| NM_020944    | GBA2    | 2361 | 2559 | 7.8955688951  |
| NM_001040006 | TCERG1  | 480  | 530  | 3.74956627109 |
| NM_001040006 | TCERG1  | 2211 | 2244 | 3.8296878803  |
| NM_001040006 | TCERG1  | 3799 | 3847 | 6.15563357537 |
| NM_001040006 | TCERG1  | 3457 | 3510 | 4.83370524456 |
| NM_001040006 | TCERG1  | 3518 | 3579 | 5.83370524456 |
| NM_001040006 | TCERG1  | 2841 | 2895 | 3.83369874942 |
| NM_001040006 | TCERG1  | 3971 | 4019 | 3.8296878803  |
| NM_001040006 | TCERG1  | 2291 | 2458 | 6.83370548048 |
| NM_001040006 | TCERG1  | 1575 | 1680 | 5.4186679812  |
| NM_001040000 | MLLT4   | 2615 | 2730 | 6.5509491193  |
| NM_001040000 | MLLT4   | 3591 | 3646 | 4.81398351758 |
| NM_001040000 | MLLT4   | 3733 | 3798 | 3.22902102441 |
| NM_001040000 | MLLT4   | 878  | 907  | 3.2288472741  |
| NM_001040000 | MLLT4   | 4702 | 4756 | 4.2288472741  |
| NM_001040000 | MLLT4   | 3469 | 3551 | 4.81398352513 |
| NM_001040000 | MLLT4   | 1829 | 1967 | 5.22902102441 |
| NM_001040000 | MLLT4   | 430  | 545  | 6.03637594647 |
| NM_001040000 | MLLT4   | 5313 | 5350 | 4.2288472741  |
| NM_001040000 | MLLT4   | 2521 | 2592 | 6.39894602586 |
| NM_001040000 | MLLT4   | 2773 | 2895 | 6.81398352513 |
| NM_001040000 | MLLT4   | 930  | 1032 | 4.22902102441 |
| NM_001040000 | MLLT4   | 2903 | 2983 | 4.22902078849 |
| NM_001040000 | MLLT4   | 746  | 876  | 4.81398352513 |
| NM_001040000 | MLLT4   | 1408 | 1492 | 4.22902102419 |
| NM_001040000 | MLLT4   | 4266 | 4408 | 5.22902102441 |
| NM_001040000 | MLLT4   | 3092 | 3184 | 3.22902101686 |
| NM_001040000 | MLLT4   | 3217 | 3448 | 6.5509491193  |
| NM_001040000 | MLLT4   | 114  | 425  | 7.75258298047 |
| NM_001040000 | MLLT4   | 3940 | 4140 | 6.39894602586 |
| NM_001040000 | MLLT4   | 2252 | 2432 | 6.39894602586 |
| NM_001040000 | MLLT4   | 1627 | 1828 | 6.39894602586 |
| NM_001040000 | MLLT4   | 1049 | 1097 | 4.22500342424 |
| NM_014890    | FILIP1L | 2997 | 3068 | 1.77855968265 |
| NM_014890    | FILIP1L | 1961 | 2039 | 1.77454881353 |
| NM_016121    | KCTD3   | 1096 | 1146 | 5.89796889567 |
| NM_016121    | KCTD3   | 494  | 571  | 5.89796889567 |
| NM_016121    | KCTD3   | 3311 | 3361 | 5.30898879477 |
| NM_016121    | KCTD3   | 1424 | 1477 | 4.31283264463 |
| NM_016121    | KCTD3   | 3046 | 3131 | 4.3130063874  |
| NM_016121    | KCTD3   | 1805 | 1900 | 7.120361317   |
| NM_016121    | KCTD3   | 1173 | 1218 | 5.30898879477 |
| NM_016121    | KCTD3   | 331  | 477  | 6.31300639494 |
| NM_016121    | KCTD3   | 1348 | 1420 | 7.120361317   |
| NM_016121    | KCTD3   | 1721 | 1782 | 5.81382968628 |

|              |        |       |       |               |
|--------------|--------|-------|-------|---------------|
| NM_016121    | KCTD3  | 964   | 1065  | 4.31300639494 |
| NM_016121    | KCTD3  | 3566  | 3706  | 5.31300639494 |
| NM_016121    | KCTD3  | 1607  | 1670  | 6.63493425391 |
| NM_016120    | RLIM   | 10296 | 10345 | 6.23104037948 |
| NM_016120    | RLIM   | 10425 | 10492 | 6.23104037948 |
| NM_016120    | RLIM   | 10209 | 10235 | 7.1469011701  |
| NM_016120    | RLIM   | 274   | 348   | 7.23086662917 |
| NM_016120    | RLIM   | 4505  | 4556  | 6.22702277931 |
| NM_016120    | RLIM   | 10158 | 10186 | 7.23103364843 |
| NM_016120    | RLIM   | 2658  | 2705  | 6.22702277931 |
| NM_016120    | RLIM   | 10358 | 10391 | 7.8160028802  |
| NM_016127    | TMEM66 | 1960  | 2032  | 3.49316291128 |
| NM_016127    | TMEM66 | 183   | 233   | 3.49316291106 |
| NM_016127    | TMEM66 | 1862  | 1913  | 4.07812541201 |
| NM_016127    | TMEM66 | 1427  | 1493  | 3.49316291128 |
| NM_016127    | TMEM66 | 1698  | 1859  | 5.07812541201 |
| NM_016127    | TMEM66 | 243   | 416   | 5.30051783334 |
| NM_016127    | TMEM66 | 445   | 1426  | 8.40005350689 |
| NM_016125    | RNFT1  | 1438  | 1493  | 9.64127303179 |
| NM_016125    | RNFT1  | 1092  | 1141  | 8.64127303179 |
| NM_016125    | RNFT1  | 805   | 846   | 8.64127303179 |
| NM_016125    | RNFT1  | 403   | 448   | 8.56115142258 |
| NM_001005242 | PKP2   | 2488  | 2555  | 8.92819153402 |
| NM_001005242 | PKP2   | 2710  | 2779  | 7.92417393385 |
| NM_001005242 | PKP2   | 3499  | 3558  | 7.84405232464 |
| NM_001005242 | PKP2   | 1673  | 1761  | 6.9281912981  |
| NM_001005242 | PKP2   | 2085  | 2154  | 6.92417393385 |
| NM_001005242 | PKP2   | 2023  | 2066  | 7.92417393385 |
| NM_001005242 | PKP2   | 2278  | 2373  | 8.51315403474 |
| NM_001005242 | PKP2   | 1339  | 1449  | 8.92819153402 |
| NM_001005242 | PKP2   | 2240  | 2275  | 7.92417393385 |
| NM_001005242 | PKP2   | 1910  | 2019  | 7.92819153402 |
| NM_001005242 | PKP2   | 1486  | 1546  | 7.92417393385 |
| NM_016129    | COPS4  | 552   | 637   | 5.53947963841 |
| NM_016129    | COPS4  | 304   | 350   | 6.12043127001 |
| NM_016128    | COPG   | 3002  | 3047  | 3.81559421019 |
| NM_016128    | COPG   | 1619  | 1684  | 5.89973341957 |
| NM_016128    | COPG   | 2854  | 2910  | 3.8957158194  |
| NM_016128    | COPG   | 2475  | 2543  | 5.48469592029 |
| NM_016128    | COPG   | 1716  | 1845  | 6.70708834163 |
| NM_016128    | COPG   | 2026  | 2128  | 5.48469592029 |
| NM_016128    | COPG   | 822   | 908   | 6.22166151445 |
| NM_016128    | COPG   | 2148  | 2206  | 3.81559421019 |
| NM_016128    | COPG   | 2545  | 2584  | 3.89955966926 |
| NM_016128    | COPG   | 987   | 1105  | 7.35916503821 |
| NM_016128    | COPG   | 2276  | 2392  | 7.48469592029 |
| NM_016128    | COPG   | 428   | 550   | 3.89973341957 |
| NM_016128    | COPG   | 2775  | 2823  | 3.89972668852 |
| NM_016128    | COPG   | 556   | 651   | 6.22166151446 |
| NM_016128    | COPG   | 1132  | 1451  | 8.06965842102 |

|              |         |      |      |               |
|--------------|---------|------|------|---------------|
| NM_016128    | COPG    | 277  | 386  | 4.89973341957 |
| NM_016128    | COPG    | 1525 | 1611 | 5.48469592029 |
| NM_016128    | COPG    | 2612 | 2775 | 6.22166151446 |
| NM_001033555 | SPECC1  | 2915 | 2979 | 11.93299859   |
| NM_001033555 | SPECC1  | 3148 | 3184 | 10.9328315707 |
| NM_001033555 | SPECC1  | 2435 | 2472 | 10.8488661117 |
| NM_001033555 | SPECC1  | 3465 | 3546 | 12.933005321  |
| NM_001033555 | SPECC1  | 3372 | 3413 | 12.4338286124 |
| NM_001033555 | SPECC1  | 2685 | 2736 | 10.9289877209 |
| NM_001033555 | SPECC1  | 1914 | 2013 | 12.5179678218 |
| NM_001033555 | SPECC1  | 1594 | 1643 | 11.9289877209 |
| NM_001033555 | SPECC1  | 2026 | 2121 | 10.933005321  |
| NM_001033555 | SPECC1  | 1464 | 1547 | 10.933005321  |
| NM_138373    | MYADM   | 1412 | 1507 | 9.74644687109 |
| NM_138373    | MYADM   | 2942 | 3024 | 7.16148437037 |
| NM_138373    | MYADM   | 185  | 249  | 8.16148437037 |
| NM_138373    | MYADM   | 2727 | 2763 | 8.74644663517 |
| NM_138373    | MYADM   | 2672 | 2713 | 7.1574667702  |
| NM_138373    | MYADM   | 1514 | 1566 | 7.1574667702  |
| NM_138373    | MYADM   | 2774 | 2856 | 9.16147763932 |
| NM_138373    | MYADM   | 1325 | 1409 | 10.3314093718 |
| NM_138373    | MYADM   | 879  | 1014 | 10.4834124653 |
| NM_138373    | MYADM   | 1569 | 1775 | 11.3314093718 |
| NM_138373    | MYADM   | 811  | 875  | 8.74644687109 |
| NM_138373    | MYADM   | 62   | 174  | 9.96883929243 |
| NM_138373    | MYADM   | 2505 | 2577 | 7.16148437036 |
| NM_138373    | MYADM   | 342  | 801  | 11.4094118838 |
| NM_138373    | MYADM   | 1016 | 1192 | 10.8619240885 |
| NM_015144    | ZCCHC14 | 989  | 1052 | 8.03366562327 |
| NM_015144    | ZCCHC14 | 2876 | 2965 | 8.03366562327 |
| NM_015144    | ZCCHC14 | 1932 | 1999 | 7.03750947312 |
| NM_015144    | ZCCHC14 | 1627 | 1717 | 8.03768322344 |
| NM_138376    | TTC5    | 1499 | 1570 | 8.19830444886 |
| NM_001134774 | KLC2    | 1893 | 1986 | 7.10973780297 |
| NM_001134774 | KLC2    | 1498 | 1538 | 7.52477530225 |
| NM_001134774 | KLC2    | 577  | 636  | 5.52075770208 |
| NM_001134774 | KLC2    | 860  | 917  | 5.52460155193 |
| NM_001134774 | KLC2    | 1745 | 1813 | 7.10956405265 |
| NM_001134774 | KLC2    | 705  | 836  | 7.10973780297 |
| NM_001134774 | KLC2    | 195  | 308  | 7.84670339714 |
| NM_001134774 | KLC2    | 991  | 1097 | 6.52477530225 |
| NM_001170629 | CHD8    | 3654 | 3762 | 6.53919801794 |
| NM_001170629 | CHD8    | 7177 | 7278 | 6.53919801794 |
| NM_001170629 | CHD8    | 5062 | 5107 | 5.9540617669  |
| NM_001170629 | CHD8    | 7122 | 7172 | 6.53919778203 |
| NM_001170629 | CHD8    | 4036 | 4087 | 4.95423550967 |
| NM_001170629 | CHD8    | 6876 | 6963 | 4.95422878617 |
| NM_001170629 | CHD8    | 2790 | 2897 | 4.95422878617 |
| NM_001170629 | CHD8    | 3377 | 3432 | 5.87009630784 |
| NM_001170629 | CHD8    | 5181 | 5252 | 6.53919801039 |

|              |        |      |      |               |
|--------------|--------|------|------|---------------|
| NM_001170629 | CHD8   | 2908 | 3000 | 6.9542352813  |
| NM_001170629 | CHD8   | 2218 | 2287 | 5.95423551722 |
| NM_001170629 | CHD8   | 6237 | 6314 | 6.53919801794 |
| NM_001170629 | CHD8   | 5433 | 5480 | 4.87009630784 |
| NM_001170629 | CHD8   | 3566 | 3625 | 4.95422878617 |
| NM_001170629 | CHD8   | 4701 | 4754 | 5.95422878617 |
| NM_001170629 | CHD8   | 5712 | 5784 | 6.53919801039 |
| NM_001170629 | CHD8   | 1987 | 2046 | 5.95021791705 |
| NM_001170629 | CHD8   | 87   | 144  | 5.9540617669  |
| NM_001170629 | CHD8   | 7732 | 7816 | 4.95422878617 |
| NM_001170629 | CHD8   | 4257 | 4357 | 6.53919801794 |
| NM_001242920 | PLTP   | 616  | 709  | 8.36638989186 |
| NM_001253    | CDC5L  | 1257 | 1309 | 4.24410265427 |
| NM_001253    | CDC5L  | 2739 | 2802 | 4.24410265427 |
| NM_001253    | CDC5L  | 1472 | 1547 | 5.24410265427 |
| NM_001253    | CDC5L  | 1380 | 1441 | 4.24009178515 |
| NM_001253    | CDC5L  | 733  | 807  | 5.74493267666 |
| NM_001253    | CDC5L  | 2285 | 2384 | 5.2441093851  |
| NM_001253    | CDC5L  | 5856 | 5934 | 4.2441091494  |
| NM_001018078 | FPGS   | 298  | 387  | 8.50803158762 |
| NM_001255    | CDC20  | 1244 | 1292 | 9.10018971361 |
| NM_001255    | CDC20  | 1161 | 1208 | 6.2928280605  |
| NM_001255    | CDC20  | 1126 | 1156 | 7.29283455563 |
| NM_001255    | CDC20  | 1489 | 1543 | 6.2928280605  |
| NM_001255    | CDC20  | 435  | 503  | 8.87779729227 |
| NM_001255    | CDC20  | 975  | 1125 | 8.29283479155 |
| NM_001255    | CDC20  | 236  | 317  | 7.29283479155 |
| NM_001255    | CDC20  | 513  | 761  | 9.99327450969 |
| NM_001255    | CDC20  | 1295 | 1424 | 8.87779729227 |
| NM_001255    | CDC20  | 783  | 883  | 7.87779729227 |
| NM_001706    | BCL6   | 321  | 356  | 5.971507395   |
| NM_001706    | BCL6   | 2118 | 2164 | 5.89138578579 |
| NM_001706    | BCL6   | 440  | 488  | 7.47634828651 |
| NM_001706    | BCL6   | 3405 | 3522 | 5.97552499517 |
| NM_001706    | BCL6   | 2497 | 2584 | 6.97552475925 |
| NM_001256    | CDC27  | 653  | 699  | 5.92184705105 |
| NM_001256    | CDC27  | 2293 | 2328 | 6.91800320119 |
| NM_001256    | CDC27  | 1686 | 1730 | 5.83788159198 |
| NM_001256    | CDC27  | 2583 | 2689 | 8.50698330209 |
| NM_001018070 | COR01B | 856  | 933  | 7.16178919014 |
| NM_001018070 | COR01B | 1553 | 1608 | 7.74675169086 |
| NM_001018070 | COR01B | 1468 | 1533 | 7.16178919014 |
| NM_001018070 | COR01B | 334  | 529  | 9.62122080878 |
| NM_001018070 | COR01B | 1317 | 1404 | 8.16178919014 |
| NM_001018070 | COR01B | 960  | 1077 | 9.16178919014 |
| NM_001018070 | COR01B | 1766 | 1866 | 7.16178919014 |
| NM_001018070 | COR01B | 562  | 788  | 9.62122080878 |
| NM_001018070 | COR01B | 138  | 309  | 8.9691441122  |
| NM_001018070 | COR01B | 1087 | 1267 | 9.9691441122  |
| NM_133494    | NEK7   | 1097 | 1165 | 7.26893240172 |

|              |         |      |      |               |
|--------------|---------|------|------|---------------|
| NM_133494    | NEK7    | 1773 | 1821 | 7.76976242411 |
| NM_133494    | NEK7    | 957  | 1015 | 7.76976242411 |
| NM_133494    | NEK7    | 2995 | 3034 | 6.2649215326  |
| NM_133494    | NEK7    | 255  | 340  | 6.2649215326  |
| NM_181575    | AUP1    | 1046 | 1134 | 6.33213134413 |
| NM_181575    | AUP1    | 1161 | 1292 | 7.33213134413 |
| NM_181575    | AUP1    | 251  | 389  | 7.0690969383  |
| NM_181575    | AUP1    | 1395 | 1508 | 4.74716884341 |
| NM_181575    | AUP1    | 740  | 950  | 7.0690969383  |
| NM_181575    | AUP1    | 390  | 661  | 8.55452376547 |
| NM_133496    | SLC30A7 | 93   | 129  | 9.85021801243 |
| NM_133496    | SLC30A7 | 466  | 569  | 11.6577466848 |
| NM_133496    | SLC30A7 | 1139 | 1214 | 11.1723198576 |
| NM_133496    | SLC30A7 | 790  | 843  | 10.4313366633 |
| NM_133496    | SLC30A7 | 1588 | 1645 | 9.85038503169 |
| NM_133496    | SLC30A7 | 3259 | 3295 | 9.85039152683 |
| NM_133496    | SLC30A7 | 1477 | 1566 | 10.8503917552 |
| NM_133496    | SLC30A7 | 1245 | 1386 | 12.0203167642 |
| NM_133496    | SLC30A7 | 1990 | 2044 | 8.85039176275 |
| NM_133496    | SLC30A7 | 930  | 1096 | 11.6577466848 |
| NM_133496    | SLC30A7 | 581  | 748  | 12.1723198576 |
| NM_133496    | SLC30A7 | 2536 | 2649 | 9.85039176253 |
| NM_133496    | SLC30A7 | 4237 | 4285 | 8.8503917552  |
| NM_133496    | SLC30A7 | 177  | 456  | 14.0203167642 |
| NM_181573    | RFC4    | 823  | 920  | 8.3563379668  |
| NM_181573    | RFC4    | 487  | 605  | 7.99376788741 |
| NM_181573    | RFC4    | 1354 | 1432 | 5.18641296513 |
| NM_181573    | RFC4    | 418  | 474  | 5.18239536518 |
| NM_181573    | RFC4    | 605  | 649  | 7.50834106024 |
| NM_181573    | RFC4    | 1295 | 1350 | 6.18239536518 |
| NM_181573    | RFC4    | 231  | 278  | 6.18239536518 |
| NM_181573    | RFC4    | 653  | 790  | 8.3563379668  |
| NM_181573    | RFC4    | 1086 | 1244 | 8.18641296535 |
| NM_000075    | CDK4    | 131  | 233  | 7.02983579272 |
| NM_000075    | CDK4    | 235  | 388  | 8.51526261989 |
| NM_000075    | CDK4    | 1053 | 1318 | 9.56588869296 |
| NM_000075    | CDK4    | 448  | 1030 | 10.6851876213 |
| NM_000075    | CDK4    | 1320 | 1450 | 6.29287019855 |
| NM_021160    | ABHD16A | 1882 | 1967 | 9.78904074889 |
| NM_021160    | ABHD16A | 1746 | 1795 | 9.78903401784 |
| NM_021160    | ABHD16A | 793  | 861  | 8.78502314872 |
| NM_021160    | ABHD16A | 450  | 541  | 7.78903401784 |
| NM_021167    | GATAD1  | 721  | 780  | 9.95324309859 |
| NM_001146070 | TDRD3   | 1188 | 1221 | 6.53454607557 |
| NM_006218    | PIK3CA  | 737  | 806  | 6.56956755007 |
| NM_017653    | DYM     | 1703 | 1736 | 6.0698615303  |
| NM_017653    | DYM     | 1366 | 1431 | 6.15400073968 |
| NM_017653    | DYM     | 2518 | 2580 | 7.15400073213 |
| NM_017653    | DYM     | 749  | 819  | 7.15382698936 |
| NM_017653    | DYM     | 2038 | 2136 | 8.15400073968 |



|              |         |      |      |               |
|--------------|---------|------|------|---------------|
| NM_001141974 | ATP13A2 | 2709 | 2766 | 9.98933864607 |
| NM_001141974 | ATP13A2 | 2959 | 3000 | 9.40437614535 |
| NM_001141974 | ATP13A2 | 1005 | 1094 | 9.98934537712 |
| NM_001141974 | ATP13A2 | 2476 | 2523 | 8.40036527623 |
| NM_001141974 | ATP13A2 | 2901 | 2957 | 8.40438264049 |
| NM_001141974 | ATP13A2 | 2178 | 2225 | 8.40036527623 |
| NM_001141974 | ATP13A2 | 1485 | 1708 | 11.7263109713 |
| NM_001141974 | ATP13A2 | 237  | 363  | 9.98934514121 |
| NM_001141974 | ATP13A2 | 364  | 467  | 9.98934537712 |
| NM_031454    | SELO    | 79   | 120  | 9.52929314894 |
| NM_031454    | SELO    | 1329 | 1408 | 8.02846312655 |
| NM_031454    | SELO    | 2030 | 2076 | 9.02846985005 |
| NM_017657    | AFTPH   | 2424 | 2467 | 6.78683162189 |
| NM_017657    | AFTPH   | 3441 | 3484 | 7.28766164428 |
| NM_017657    | AFTPH   | 2042 | 2131 | 6.78683834539 |
| NM_017657    | AFTPH   | 1941 | 2020 | 7.37179412261 |
| NM_017657    | AFTPH   | 1576 | 1669 | 7.78683835294 |
| NM_017657    | AFTPH   | 3768 | 3833 | 5.78683162189 |
| NM_000612    | IGF2    | 301  | 388  | 2.54867400991 |
| NM_001161465 | JMJD4   | 590  | 645  | 8.84781577756 |
| NM_000611    | CD59    | 5214 | 5282 | 6.32381862477 |
| NM_000611    | CD59    | 1828 | 1857 | 4.73484525493 |
| NM_000611    | CD59    | 6886 | 6928 | 5.65472364572 |
| NM_000611    | CD59    | 3996 | 4058 | 5.7388628551  |
| NM_000611    | CD59    | 3846 | 3888 | 4.73885612405 |
| NM_000611    | CD59    | 4172 | 4228 | 6.31980775565 |
| NM_000611    | CD59    | 3739 | 3807 | 5.73886285511 |
| NM_000611    | CD59    | 4059 | 4123 | 5.73886284756 |
| NM_000611    | CD59    | 3270 | 3383 | 6.32382535583 |
| NM_000611    | CD59    | 977  | 1167 | 8.90878785655 |
| NM_000611    | CD59    | 2587 | 2644 | 5.73886285511 |
| NM_000611    | CD59    | 2094 | 2167 | 5.73868910479 |
| NM_000611    | CD59    | 1890 | 1995 | 6.32382535583 |
| NM_000611    | CD59    | 1447 | 1555 | 7.54621777716 |
| NM_000611    | CD59    | 4826 | 4928 | 6.32382535583 |
| NM_000611    | CD59    | 3606 | 3738 | 6.73886285511 |
| NM_000611    | CD59    | 1586 | 1828 | 9.13118027788 |
| NM_000611    | CD59    | 1212 | 1377 | 8.32382535583 |
| NM_000611    | CD59    | 2951 | 3033 | 5.73885612405 |
| NM_000611    | CD59    | 3528 | 3593 | 5.73484525493 |
| NM_000611    | CD59    | 93   | 689  | 11.06079095   |
| NM_000611    | CD59    | 695  | 952  | 8.32382535583 |
| NM_000611    | CD59    | 2645 | 2775 | 6.73886285511 |
| NM_021705    | NFYA    | 3157 | 3208 | 6.25598434963 |
| NM_021705    | NFYA    | 3305 | 3425 | 8.2600019498  |
| NM_021705    | NFYA    | 1714 | 1818 | 6.25999521875 |
| NM_021705    | NFYA    | 1822 | 1886 | 6.17586274042 |
| NM_182705    | FAM101B | 575  | 633  | 8.73090553788 |
| NM_001035521 | GTF3C2  | 2458 | 2486 | 5.66560371175 |
| NM_001035521 | GTF3C2  | 371  | 412  | 6.74974292113 |

|              |          |      |      |                |               |
|--------------|----------|------|------|----------------|---------------|
| NM_001035521 | GTF3C2   | 2644 | 2715 | 7.74974292113  |               |
| NM_001035521 | GTF3C2   | 2079 | 2134 | 7.33470542163  |               |
| NM_001035521 | GTF3C2   | 2878 | 2947 | 6.74572532096  |               |
| NM_001035521 | GTF3C2   | 1776 | 1845 | 5.74572532096  |               |
| NM_001035521 | GTF3C2   | 1328 | 1386 | 5.74572532096  |               |
| NM_001035521 | GTF3C2   | 3636 | 3744 | 5.74974291358  |               |
| NM_001035521 | GTF3C2   | 1056 | 1091 | 6.74572532096  |               |
| NM_001035521 | GTF3C2   | 2190 | 2230 | 5.66560371175  |               |
| NM_001035521 | GTF3C2   | 1252 | 1312 | 6.74572532096  |               |
| NM_001035521 | GTF3C2   | 2301 | 2402 | 6.74974292113  |               |
| NM_017655    | GIPC2    | 1188 | 1271 | 6.71618596547  |               |
| NM_017655    | GIPC2    | 1286 | 1359 | 6.30114846619  |               |
| NM_017658    | KLHL28   | 1016 | 1069 | 9.67065238767  |               |
| NM_017659    | QPCTL    | 1063 | 1118 | 8.71092020322  |               |
| NM_017659    | QPCTL    | 985  | 1036 | 9.29588246802  |               |
| NM_017659    | QPCTL    | 706  | 844  | 10.8808452047  |               |
| NM_017659    | QPCTL    | 859  | 929  | 7.7107464529   |               |
| NM_017659    | QPCTL    | 1331 | 1406 | 8.71092020322  |               |
| NM_017659    | QPCTL    | 330  | 409  | 9.29587597289  |               |
| NM_021709    | SIVA1    | 243  | 282  | 6.19023910479  |               |
| NM_021709    | SIVA1    | 285  | 509  | 10.0971299363  |               |
| NM_001006    | RPS3A    | 764  | 878  | 2.93968143997  |               |
| NM_001006    | RPS3A    | 654  | 738  | 0.824204222555 |               |
| NM_001006    | RPS3A    | 138  | 189  | 2.04659664389  |               |
| NM_001006    | RPS3A    | 189  | 654  | 5.40916672328  |               |
| NM_001009571 | CADPS2   | 1516 | 1588 | 5.81591350922  |               |
| NM_001025930 | TTLL3    | 1446 | 1500 | 8.35264127267  |               |
| NM_001025930 | TTLL3    | 2509 | 2539 | 8.35264127267  |               |
| NM_001025930 | TTLL3    | 705  | 857  | 10.436780482   |               |
| NM_001083613 | TMEM219  | 258  | 301  | 4.74082847623  |               |
| NM_001083613 | TMEM219  | 521  | 599  | 5.82496744969  |               |
| NM_001083613 | TMEM219  | 462  | 514  | 3.82095008544  |               |
| NM_001083613 | TMEM219  | 748  | 819  | 6.1468957805   |               |
| NM_001083617 | RB1CC1   | 2919 | 2966 | 5.081685361    |               |
| NM_001083617 | RB1CC1   | 1609 | 1674 | 4.08169185614  |               |
| NM_001083614 | EARS2    | 243  | 294  | 6.29619947845  |               |
| NM_001083614 | EARS2    | 958  | 1013 | 7.8851795718   |               |
| NM_001083614 | EARS2    | 2283 | 2412 | 7.30021707863  |               |
| NM_003257    | TJP1     | 6599 | 6680 | 6.28516998079  |               |
| NM_003257    | TJP1     | 2672 | 2743 | 5.28115911167  |               |
| NM_003257    | TJP1     | 5124 | 5198 | 7.60710480651  |               |
| NM_003257    | TJP1     | 3752 | 3851 | 6.28517671162  |               |
| NM_003257    | TJP1     | 1145 | 1185 | 6.86612161239  |               |
| NM_003257    | TJP1     | 6796 | 6827 | 5.28517647592  |               |
| NM_003257    | TJP1     | 5467 | 5522 | 6.20103750246  |               |
| NM_003257    | TJP1     | 1284 | 1334 | 6.28115911167  |               |
| NM_003257    | TJP1     | 5903 | 5959 | 5.28115911167  |               |
| NM_003257    | TJP1     | 4420 | 4529 | 6.28517671184  |               |
| NM_203415    | C17orf81 |      | 731  | 796            | 7.72784068104 |
| NM_203415    | C17orf81 |      | 149  | 220            | 6.06275657111 |

|              |            |      |               |               |
|--------------|------------|------|---------------|---------------|
| NM_203415    | C17orf81   | 437  | 548           | 8.73185828122 |
| NM_203415    | C17orf81   | 225  | 392           | 9.73185828122 |
| NM_003254    | TIMP1 777  | 849  | 11.0617621504 |               |
| NM_003254    | TIMP1 360  | 395  | 10.977623177  |               |
| NM_003254    | TIMP1 545  | 597  | 11.0577447862 |               |
| NM_003254    | TIMP1 286  | 353  | 11.0617621504 |               |
| NM_003252    | TIAL1 3469 | 3509 | 4.36449160864 |               |
| NM_003252    | TIAL1 1524 | 1612 | 5.59090163015 |               |
| NM_003252    | TIAL1 1719 | 1790 | 4.78354670809 |               |
| NM_003252    | TIAL1 574  | 684  | 5.36850920882 |               |
| NM_003252    | TIAL1 1115 | 1170 | 4.36449160864 |               |
| NM_003252    | TIAL1 1459 | 1508 | 2.78353997704 |               |
| NM_003252    | TIAL1 1621 | 1719 | 2.78354670809 |               |
| NM_003252    | TIAL1 1291 | 1457 | 6.10547480298 |               |
| NM_003252    | TIAL1 702  | 776  | 3.78354647218 |               |
| NM_003252    | TIAL1 1825 | 1921 | 5.10547480298 |               |
| NM_003252    | TIAL1 1000 | 1113 | 4.78354670809 |               |
| NM_003252    | TIAL1 91   | 166  | 2.78354670809 |               |
| NM_003252    | TIAL1 1171 | 1276 | 5.10547480298 |               |
| NM_001011649 | CDK5RAP2   | 5023 | 5081          | 5.9572724531  |
| NM_001011649 | CDK5RAP2   | 4203 | 4247          | 6.62620041289 |
| NM_001011649 | CDK5RAP2   | 1534 | 1608          | 6.04141142657 |
| NM_001011649 | CDK5RAP2   | 4387 | 4436          | 5.03739406231 |
| NM_001011649 | CDK5RAP2   | 2564 | 2613          | 5.04140493143 |
| NM_001011649 | CDK5RAP2   | 3529 | 3583          | 6.03739406231 |
| NM_001011649 | CDK5RAP2   | 4248 | 4384          | 8.04141166249 |
| NM_001011649 | CDK5RAP2   | 3449 | 3496          | 5.9572724531  |
| NM_001011649 | CDK5RAP2   | 5118 | 5234          | 6.04141166248 |
| NM_001011649 | CDK5RAP2   | 1688 | 1789          | 6.04141166226 |
| NM_001042424 | WHSC1 5611 | 5672 | 5.10219012564 |               |
| NM_001042424 | WHSC1 887  | 920  | 5.01822466658 |               |
| NM_001042424 | WHSC1 3999 | 4108 | 7.90971879802 |               |
| NM_001042424 | WHSC1 5561 | 5610 | 5.01822466658 |               |
| NM_001042424 | WHSC1 2323 | 2380 | 5.10219012564 |               |
| NM_001042424 | WHSC1 584  | 640  | 6.68732636913 |               |
| NM_001042424 | WHSC1 1691 | 1756 | 6.10219012564 |               |
| NM_001042424 | WHSC1 6736 | 6792 | 6.10236387596 |               |
| NM_001042424 | WHSC1 6000 | 6051 | 6.68732637668 |               |
| NM_001042424 | WHSC1 6556 | 6652 | 7.68732637668 |               |
| NM_001042424 | WHSC1 2722 | 2775 | 5.10236387595 |               |
| NM_001042424 | WHSC1 3879 | 3936 | 6.10236386841 |               |
| NM_001042424 | WHSC1 3409 | 3497 | 6.68732637668 |               |
| NM_001042424 | WHSC1 6178 | 6271 | 7.42429197085 |               |
| NM_001042424 | WHSC1 833  | 882  | 6.10219012564 |               |
| NM_001042424 | WHSC1 239  | 318  | 6.10236387596 |               |
| NM_001042424 | WHSC1 4343 | 4419 | 6.01822466658 |               |
| NM_001042424 | WHSC1 6365 | 6498 | 6.10236387596 |               |
| NM_001042424 | WHSC1 2097 | 2197 | 6.10236387596 |               |
| NM_001042424 | WHSC1 3530 | 3628 | 7.90971879802 |               |
| NM_001042424 | WHSC1 987  | 1069 | 7.10236387574 |               |

|              |         |      |      |               |
|--------------|---------|------|------|---------------|
| NM_001042424 | WHSC1   | 3307 | 3344 | 5.10235714491 |
| NM_001042424 | WHSC1   | 7054 | 7260 | 8.10236387596 |
| NM_001042424 | WHSC1   | 3239 | 3306 | 6.10236387596 |
| NM_001042424 | WHSC1   | 134  | 197  | 7.10236387596 |
| NM_001042424 | WHSC1   | 1758 | 1896 | 6.68732637668 |
| NM_001042424 | WHSC1   | 5151 | 5280 | 6.68732637668 |
| NM_001042424 | WHSC1   | 2906 | 2979 | 6.68732637668 |
| NM_001042424 | WHSC1   | 5013 | 5147 | 8.2722888774  |
| NM_001042424 | WHSC1   | 3628 | 3788 | 8.2722888774  |
| NM_001042424 | WHSC1   | 4110 | 4181 | 6.10219012564 |
| NM_001042424 | WHSC1   | 5810 | 5956 | 6.68732637668 |
| NM_001042424 | WHSC1   | 1933 | 2015 | 5.10236386841 |
| NM_001042424 | WHSC1   | 4582 | 4741 | 8.42429197085 |
| NM_001042424 | WHSC1   | 2552 | 2648 | 6.10236387595 |
| NM_001042424 | WHSC1   | 7441 | 7535 | 5.10236387596 |
| NM_001042424 | WHSC1   | 2782 | 2870 | 7.42429197085 |
| NM_001042424 | WHSC1   | 7369 | 7437 | 6.68732637668 |
| NM_001042424 | WHSC1   | 4747 | 5011 | 7.68732637668 |
| NM_001042424 | WHSC1   | 1569 | 1631 | 5.09834627579 |
| NM_001042424 | WHSC1   | 1384 | 1478 | 5.10236387596 |
| NM_004911    | PDIA4   | 1240 | 1282 | 1.87682715284 |
| NM_004911    | PDIA4   | 2504 | 2551 | 4.19473764755 |
| NM_004911    | PDIA4   | 2081 | 2277 | 6.04675215428 |
| NM_004911    | PDIA4   | 2897 | 2943 | 1.87280955267 |
| NM_004911    | PDIA4   | 2571 | 2687 | 5.87682715284 |
| NM_004911    | PDIA4   | 1315 | 1479 | 6.04675215428 |
| NM_004911    | PDIA4   | 687  | 965  | 6.57726687098 |
| NM_004911    | PDIA4   | 280  | 671  | 7.19875524773 |
| NM_004911    | PDIA4   | 2284 | 2413 | 6.52068334261 |
| NM_004911    | PDIA4   | 985  | 1229 | 6.57726687098 |
| NM_004911    | PDIA4   | 1499 | 1985 | 7.6841820749  |
| NM_004911    | PDIA4   | 120  | 225  | 3.46178965356 |
| NM_004910    | PITPNM1 | 912  | 1001 | 10.7344475837 |
| NM_004910    | PITPNM1 | 3409 | 3462 | 9.41234573845 |
| NM_004910    | PITPNM1 | 2268 | 2372 | 9.99748198949 |
| NM_004910    | PITPNM1 | 1875 | 1967 | 9.99748198949 |
| NM_004910    | PITPNM1 | 235  | 297  | 8.41234573845 |
| NM_004910    | PITPNM1 | 3597 | 3652 | 8.32838027939 |
| NM_004910    | PITPNM1 | 1171 | 1357 | 11.8719511074 |
| NM_004910    | PITPNM1 | 2529 | 2609 | 8.41251275772 |
| NM_004910    | PITPNM1 | 1624 | 1717 | 8.41251948877 |
| NM_198531    | ATP9B   | 530  | 600  | 9.02987362383 |
| NM_198531    | ATP9B   | 2444 | 2524 | 9.6148361321  |
| NM_198531    | ATP9B   | 1115 | 1203 | 10.8372285534 |
| NM_198531    | ATP9B   | 1234 | 1301 | 8.0258560312  |
| NM_198531    | ATP9B   | 232  | 292  | 9.61482940105 |
| NM_032888    | COL27A1 | 609  | 661  | 8.14970781123 |
| NM_032888    | COL27A1 | 81   | 130  | 5.74364050696 |
| NM_032888    | COL27A1 | 1542 | 1596 | 5.82376211617 |
| NM_032888    | COL27A1 | 743  | 841  | 5.82777948043 |

|              |                |      |      |                 |
|--------------|----------------|------|------|-----------------|
| NM_032888    | COL27A1        | 2978 | 3083 | 5.82777298529   |
| NM_032889    | MFSD5          | 1125 | 1196 | 10.8169833902   |
| NM_032889    | MFSD5          | 1347 | 1470 | 11.0096284682   |
| NM_032889    | MFSD5          | 482  | 617  | 11.1795534696   |
| NM_032889    | MFSD5          | 1520 | 1668 | 11.3315565631   |
| NM_032889    | MFSD5          | 1234 | 1345 | 11.1795534696   |
| NM_032889    | MFSD5          | 656  | 967  | 11.8169833902   |
| NM_032889    | MFSD5          | 199  | 469  | 11.1795534696   |
| NM_032889    | MFSD5          | 969  | 1106 | 11.5945909689   |
| NM_001199973 | RPL36A-HNRNPH2 | 1553 | 1639 | 2.3918947941    |
| NM_001199973 | RPL36A-HNRNPH2 | 846  | 881  | -0.197085306791 |
| NM_001199973 | RPL36A-HNRNPH2 | 766  | 804  | 1.39189479388   |
| NM_001199973 | RPL36A-HNRNPH2 | 409  | 449  | 1.3918947941    |
| NM_001199973 | RPL36A-HNRNPH2 | 660  | 763  | 0.806932293382  |
| NM_001199973 | RPL36A-HNRNPH2 | 2345 | 2386 | -0.193067942537 |
| NM_001199973 | RPL36A-HNRNPH2 | 1516 | 1549 | 0.806925562328  |
| NM_001199973 | RPL36A-HNRNPH2 | 1450 | 1514 | 0.806932285832  |
| NM_001199973 | RPL36A-HNRNPH2 | 1254 | 1353 | 2.12886038827   |
| NM_001199973 | RPL36A-HNRNPH2 | 154  | 408  | 4.12886038827   |
| NM_001199973 | RPL36A-HNRNPH2 | 1029 | 1083 | 0.806932293375  |
| NM_198536    | TMEM205        | 103  | 174  | 10.6679177388   |
| NM_198536    | TMEM205        | 806  | 1014 | 12.6679244698   |
| NM_198536    | TMEM205        | 1103 | 1219 | 12.5423935877   |
| NM_198536    | TMEM205        | 640  | 725  | 9.08295523804   |
| NM_001135602 | GLB1           | 1214 | 1327 | 7.76141838346   |
| NM_001135602 | GLB1           | 711  | 801  | 5.17645588274   |
| NM_001135602 | GLB1           | 152  | 242  | 6.17645588274   |
| NM_001135602 | GLB1           | 506  | 558  | 7.49838397741   |
| NM_001135602 | GLB1           | 1811 | 1872 | 7.17628213242   |
| NM_001135602 | GLB1           | 826  | 915  | 7.76141838346   |
| NM_001135602 | GLB1           | 256  | 356  | 7.49838397763   |
| NM_001135602 | GLB1           | 949  | 1196 | 8.9838108048    |
| NM_001135602 | GLB1           | 1562 | 1714 | 8.49838397763   |
| NM_032881    | LSM10          | 720  | 770  | 7.77914879157   |
| NM_032881    | LSM10          | 400  | 476  | 6.19418629085   |
| NM_032885    | ATG4D          | 1373 | 1422 | 8.76496303696   |
| NM_032885    | ATG4D          | 1646 | 1713 | 8.76898063713   |
| NM_032885    | ATG4D          | 1235 | 1297 | 10.3539429019   |
| NM_003038    | SLC1A4         | 2380 | 2452 | 8.76210618382   |
| NM_003038    | SLC1A4         | 3473 | 3567 | 8.27667935665   |
| NM_003038    | SLC1A4         | 2342 | 2377 | 5.87061205237   |
| NM_003038    | SLC1A4         | 2584 | 2644 | 5.95475126154   |
| NM_003038    | SLC1A4         | 76   | 145  | 7.95475126176   |
| NM_003038    | SLC1A4         | 4221 | 4274 | 6.9547445307    |
| NM_003038    | SLC1A4         | 3324 | 3463 | 9.6551909799    |
| NM_003038    | SLC1A4         | 3040 | 3146 | 6.95475126176   |
| NM_003038    | SLC1A4         | 2784 | 2873 | 7.53971376248   |
| NM_003038    | SLC1A4         | 3207 | 3271 | 6.95475125421   |
| NM_003038    | SLC1A4         | 2216 | 2322 | 9.1246762632    |
| NM_003038    | SLC1A4         | 4447 | 4551 | 8.27667935665   |

|           |        |      |      |               |
|-----------|--------|------|------|---------------|
| NM_003038 | SLC1A4 | 145  | 332  | 8.95475126176 |
| NM_003038 | SLC1A4 | 3836 | 3929 | 5.95457751144 |
| NM_003038 | SLC1A4 | 536  | 671  | 8.53971376248 |
| NM_003038 | SLC1A4 | 2002 | 2216 | 10.042214103  |
| NM_003038 | SLC1A4 | 1767 | 1988 | 8.53971376248 |
| NM_003038 | SLC1A4 | 736  | 1766 | 12.6412517889 |
| NM_003038 | SLC1A4 | 2455 | 2577 | 8.27667935665 |
| NM_006048 | UBE4B  | 3985 | 4084 | 6.54251490615 |
| NM_006048 | UBE4B  | 2593 | 2702 | 5.5425216372  |
| NM_006048 | UBE4B  | 964  | 994  | 5.45838242782 |
| NM_006048 | UBE4B  | 728  | 767  | 6.54234788689 |
| NM_006048 | UBE4B  | 2426 | 2531 | 8.5425216372  |
| NM_006048 | UBE4B  | 1541 | 1617 | 7.04334492854 |
| NM_006048 | UBE4B  | 2983 | 3085 | 7.12748413792 |
| NM_139159 | DPP9   | 3915 | 3962 | 6.794048685   |
| NM_139159 | DPP9   | 981  | 1022 | 6.79388166573 |
| NM_139159 | DPP9   | 573  | 675  | 8.37901791677 |
| NM_139159 | DPP9   | 1132 | 1187 | 7.79405541604 |
| NM_139159 | DPP9   | 3126 | 3155 | 7.794048685   |
| NM_139159 | DPP9   | 1633 | 1701 | 7.79405541605 |
| NM_139159 | DPP9   | 2896 | 2960 | 9.11598351094 |
| NM_139159 | DPP9   | 2619 | 2676 | 8.37901791677 |
| NM_139159 | DPP9   | 2726 | 2822 | 9.11598351094 |
| NM_139159 | DPP9   | 2414 | 2486 | 6.79405518013 |
| NM_139159 | DPP9   | 1571 | 1620 | 7.79388166573 |
| NM_139159 | DPP9   | 1724 | 1838 | 9.60141033811 |
| NM_139159 | DPP9   | 4194 | 4267 | 8.79405541605 |
| NM_139159 | DPP9   | 855  | 944  | 8.79405541583 |
| NM_139159 | DPP9   | 2150 | 2227 | 7.79405541605 |
| NM_139159 | DPP9   | 1205 | 1366 | 9.11598351094 |
| NM_139159 | DPP9   | 3215 | 3330 | 7.79405541605 |
| NM_139159 | DPP9   | 3656 | 3721 | 7.7940554085  |
| NM_139159 | DPP9   | 293  | 339  | 8.3750003166  |
| NM_139159 | DPP9   | 155  | 293  | 9.37901791677 |
| NM_139159 | DPP9   | 423  | 498  | 8.37901790922 |
| NM_006045 | ATP9A  | 1021 | 1080 | 6.44240427975 |
| NM_006045 | ATP9A  | 3089 | 3123 | 5.4423975487  |
| NM_006045 | ATP9A  | 2549 | 2607 | 6.43838667958 |
| NM_006045 | ATP9A  | 1402 | 1459 | 7.44223052943 |
| NM_006045 | ATP9A  | 864  | 936  | 7.02736678047 |
| NM_006045 | ATP9A  | 1876 | 1961 | 5.44240427974 |
| NM_006045 | ATP9A  | 1813 | 1866 | 6.4423975487  |
| NM_006045 | ATP9A  | 7335 | 7377 | 5.4423975487  |
| NM_006045 | ATP9A  | 3166 | 3210 | 5.44223052943 |
| NM_006045 | ATP9A  | 486  | 528  | 6.4423975487  |
| NM_006045 | ATP9A  | 1518 | 1630 | 7.76433237464 |
| NM_006045 | ATP9A  | 7496 | 7557 | 5.35826507036 |
| NM_006045 | ATP9A  | 1207 | 1270 | 5.44240404383 |
| NM_006045 | ATP9A  | 5031 | 5068 | 5.35826507036 |
| NM_006045 | ATP9A  | 3023 | 3084 | 7.44240427975 |

|              |        |      |      |               |
|--------------|--------|------|------|---------------|
| NM_006045    | ATP9A  | 2610 | 2734 | 8.02736678047 |
| NM_006045    | ATP9A  | 1088 | 1199 | 7.02736678047 |
| NM_006045    | ATP9A  | 938  | 1017 | 5.4423975487  |
| NM_006045    | ATP9A  | 6534 | 6597 | 6.44223052943 |
| NM_006045    | ATP9A  | 3417 | 3516 | 7.02736678047 |
| NM_006045    | ATP9A  | 3557 | 3665 | 7.02736678047 |
| NM_006045    | ATP9A  | 236  | 355  | 7.76433237464 |
| NM_006045    | ATP9A  | 5950 | 6026 | 6.43838667958 |
| NM_006045    | ATP9A  | 6381 | 6447 | 6.43838667958 |
| NM_006045    | ATP9A  | 739  | 848  | 5.44240427975 |
| NM_006510    | TRIM27 | 51   | 100  | 6.75951593696 |
| NM_006510    | TRIM27 | 1009 | 1058 | 5.75934218686 |
| NM_006510    | TRIM27 | 433  | 493  | 5.75950920612 |
| NM_006510    | TRIM27 | 1249 | 1376 | 8.08144403207 |
| NM_006510    | TRIM27 | 1670 | 1703 | 7.34447843035 |
| NM_006510    | TRIM27 | 1452 | 1536 | 5.75951593717 |
| NM_006510    | TRIM27 | 2512 | 2586 | 6.75951570126 |
| NM_006510    | TRIM27 | 1780 | 1844 | 5.67537672779 |
| NM_006510    | TRIM27 | 1117 | 1182 | 6.75951593717 |
| NM_006510    | TRIM27 | 2157 | 2212 | 7.75549833701 |
| NM_006516    | SLC2A1 | 2681 | 2749 | 4.32283187301 |
| NM_006516    | SLC2A1 | 1376 | 1419 | 5.90779437395 |
| NM_006516    | SLC2A1 | 2151 | 2205 | 4.32283187301 |
| NM_006516    | SLC2A1 | 1442 | 1507 | 3.32283163731 |
| NM_006516    | SLC2A1 | 702  | 893  | 6.49275687467 |
| NM_006516    | SLC2A1 | 1734 | 1885 | 6.90779437395 |
| NM_006516    | SLC2A1 | 2789 | 2848 | 4.32265812291 |
| NM_006516    | SLC2A1 | 1174 | 1301 | 5.32283187323 |
| NM_006516    | SLC2A1 | 1568 | 1677 | 5.64475996812 |
| NM_006516    | SLC2A1 | 1026 | 1165 | 5.32283187323 |
| NM_006515    | SETMAR | 1059 | 1133 | 9.55005999255 |
| NM_001128923 | SH3D19 | 2716 | 2770 | 5.45852830179 |
| NM_001128923 | SH3D19 | 1235 | 1303 | 6.19951149612 |
| NM_001128923 | SH3D19 | 2585 | 2626 | 4.87356580107 |
| NM_001128923 | SH3D19 | 695  | 754  | 5.46237215164 |
| NM_001128923 | SH3D19 | 2155 | 2226 | 5.79344419185 |
| NM_001128923 | SH3D19 | 1455 | 1526 | 3.87356580107 |
| NM_001128923 | SH3D19 | 789  | 883  | 3.87356580107 |
| NM_001127202 | PCID2  | 1571 | 1660 | 7.76925077945 |
| NM_001127202 | PCID2  | 1070 | 1172 | 8.13182085884 |
| NM_001127202 | PCID2  | 561  | 595  | 4.95787825722 |
| NM_001127202 | PCID2  | 1470 | 1527 | 4.96188912634 |
| NM_001127202 | PCID2  | 672  | 945  | 7.54685835811 |
| NM_001127202 | PCID2  | 993  | 1059 | 5.96189585739 |
| NM_001127202 | PCID2  | 1287 | 1389 | 4.96189585739 |
| NM_001017524 | SIRT3  | 1299 | 1402 | 6.76017179441 |
| NM_001017524 | SIRT3  | 507  | 587  | 6.76017179441 |
| NM_001204859 | TCEB1  | 358  | 407  | 6.64350056183 |
| NM_001204859 | TCEB1  | 643  | 743  | 9.10293218802 |
| NM_001204859 | TCEB1  | 411  | 512  | 7.96542866427 |

|              |         |      |      |               |
|--------------|---------|------|------|---------------|
| NM_001204859 | TCEB1   | 757  | 843  | 7.2284630701  |
| NM_024828    | C9orf82 | 1894 | 1990 | 4.84868436981 |
| NM_024821    | CCDC134 | 160  | 207  | 9.72160737887 |
| NM_024821    | CCDC134 | 308  | 420  | 9.72160737887 |
| NM_024821    | CCDC134 | 214  | 271  | 8.72160714295 |
| NM_024821    | CCDC134 | 21   | 147  | 10.7216073789 |
| NM_024821    | CCDC134 | 1016 | 1122 | 9.72160737132 |
| NM_014965    | TRAK1   | 1853 | 1918 | 5.04431721844 |
| NM_001037806 | NCKAP5L | 450  | 504  | 11.2349383653 |
| NM_001037806 | NCKAP5L | 3536 | 3591 | 10.8199008661 |
| NM_001037806 | NCKAP5L | 4651 | 4782 | 9.23493837289 |
| NM_014187    | TMEM208 | 508  | 547  | 6.51804052506 |
| NM_014187    | TMEM208 | 31   | 90   | 6.51804052506 |
| NM_014187    | TMEM208 | 113  | 394  | 9.4095346565  |
| NM_013388    | PREB    | 1683 | 1743 | 5.2676512798  |
| NM_013388    | PREB    | 1350 | 1455 | 5.85261401644 |
| NM_013388    | PREB    | 1819 | 1898 | 5.26363391554 |
| NM_013388    | PREB    | 676  | 738  | 5.76847480705 |
| NM_013388    | PREB    | 1277 | 1307 | 4.2676512798  |
| NM_013388    | PREB    | 1180 | 1250 | 4.26765151549 |
| NM_013387    | UQCR10  | 20   | 124  | 3.01269480316 |
| NM_013382    | POMT2   | 2761 | 2813 | 8.71403128425 |
| NM_013382    | POMT2   | 2220 | 2255 | 9.62989207486 |
| NM_013382    | POMT2   | 2828 | 2894 | 10.7140312767 |
| NM_013382    | POMT2   | 673  | 715  | 8.71402455319 |
| NM_013382    | POMT2   | 437  | 477  | 8.62989207486 |
| NM_013382    | POMT2   | 1319 | 1390 | 8.71403128402 |
| NM_013382    | POMT2   | 1187 | 1271 | 10.714031284  |
| NM_013382    | POMT2   | 1510 | 1584 | 9.71403128425 |
| NM_013382    | POMT2   | 1391 | 1491 | 9.71403128425 |
| NM_013382    | POMT2   | 1008 | 1075 | 11.298993785  |
| NM_013382    | POMT2   | 822  | 1005 | 11.0359593791 |
| NM_005017    | PCYT1A  | 655  | 712  | 6.46233461724 |
| NM_005017    | PCYT1A  | 1297 | 1379 | 6.46635221742 |
| NM_005017    | PCYT1A  | 390  | 525  | 7.7882803123  |
| NM_213601    | TMED8   | 219  | 279  | 7.78087176658 |
| NM_005467    | NAALAD2 | 1618 | 1664 | 8.70643298924 |
| NM_014186    | COMMD9  | 218  | 285  | 10.5124157191 |
| NM_018173    | PLEKHG6 | 203  | 273  | 8.90309947908 |
| NM_018170    | RPRD1A  | 1330 | 1411 | 6.39209248967 |
| NM_018170    | RPRD1A  | 385  | 444  | 4.06999064469 |
| NM_018177    | N4BP2   | 4504 | 4591 | 7.33098330919 |
| NM_018177    | N4BP2   | 539  | 616  | 5.74200321584 |
| NM_018177    | N4BP2   | 4671 | 4770 | 5.7458470657  |
| NM_018174    | MAP1S   | 130  | 172  | 8.4609956611  |
| NM_018174    | MAP1S   | 756  | 808  | 10.126079771  |
| NM_018174    | MAP1S   | 2393 | 2452 | 8.54111727031 |
| NM_018174    | MAP1S   | 2210 | 2263 | 8.54111727031 |
| NM_018174    | MAP1S   | 246  | 401  | 11.3524897925 |
| NM_018174    | MAP1S   | 2972 | 3068 | 9.54513487048 |



|              |              |      |               |               |
|--------------|--------------|------|---------------|---------------|
| NM_018178    | GOLPH3L 821  | 890  | 4.46499356406 |               |
| NM_018178    | GOLPH3L 253  | 286  | 4.54511517327 |               |
| NM_018178    | GOLPH3L 703  | 789  | 6.54913277344 |               |
| NM_018178    | GOLPH3L 1490 | 1564 | 6.13392152385 |               |
| NM_018178    | GOLPH3L 62   | 108  | 6.130077674   |               |
| NM_018178    | GOLPH3L 2075 | 2120 | 4.54511517327 |               |
| NM_018178    | GOLPH3L 921  | 988  | 5.54912604239 |               |
| NM_147150    | PALM2-AKAP2  | 3605 | 3675          | 7.89390938075 |
| NM_147150    | PALM2-AKAP2  | 2146 | 2267          | 9.47887861253 |
| NM_147150    | PALM2-AKAP2  | 3008 | 3085          | 6.88989851163 |
| NM_147150    | PALM2-AKAP2  | 971  | 1022          | 6.89391587589 |
| NM_147150    | PALM2-AKAP2  | 1635 | 1674          | 6.80977690242 |
| NM_147150    | PALM2-AKAP2  | 1069 | 1101          | 6.88989851163 |
| NM_147150    | PALM2-AKAP2  | 2291 | 2348          | 8.47887861253 |
| NM_002618    | PEX13 923    | 1010 | 6.67623445036 |               |
| NM_002618    | PEX13 779    | 837  | 4.86870577798 |               |
| NM_002618    | PEX13 544    | 619  | 3.86887952075 |               |
| NM_002618    | PEX13 620    | 765  | 6.19080762319 |               |
| NM_002618    | PEX13 370    | 440  | 5.86887952075 |               |
| NM_002342    | LTBR 1174    | 1247 | 7.96882977675 |               |
| NM_002342    | LTBR 1800    | 1859 | 6.96481217658 |               |
| NM_002342    | LTBR 925     | 1011 | 8.29075787164 |               |
| NM_002342    | LTBR 2054    | 2111 | 5.96882977653 |               |
| NM_002342    | LTBR 1539    | 1664 | 7.55379227748 |               |
| NM_002342    | LTBR 1021    | 1119 | 8.29075787164 |               |
| NM_002342    | LTBR 543     | 644  | 9.1387547782  |               |
| NM_002342    | LTBR 428     | 490  | 8.29075787164 |               |
| NM_002342    | LTBR 703     | 734  | 6.88469056737 |               |
| NM_002342    | LTBR 1977    | 2039 | 6.96882976921 |               |
| NM_002342    | LTBR 737     | 834  | 8.55379227748 |               |
| NM_002342    | LTBR 198     | 288  | 8.29075787164 |               |
| NM_002342    | LTBR 343     | 408  | 6.96882976921 |               |
| NM_002615    | SERPINF1     | 761  | 956           | 5.18492211349 |
| NM_002615    | SERPINF1     | 73   | 136           | 2.98328825233 |
| NM_002615    | SERPINF1     | 958  | 1125          | 3.98328825233 |
| NM_002615    | SERPINF1     | 153  | 247           | 1.66136015744 |
| NM_002615    | SERPINF1     | 289  | 753           | 5.83128515888 |
| NM_002615    | SERPINF1     | 1125 | 1402          | 4.98328825233 |
| NM_001166271 | SPATA13 7940 | 8048 | 7.8704340908  |               |
| NM_001166271 | SPATA13 2310 | 2356 | 7.87043409058 |               |
| NM_001166271 | SPATA13 3520 | 3583 | 6.87042735975 |               |
| NM_001166271 | SPATA13 272  | 306  | 6.78629488142 |               |
| NM_001166271 | SPATA13 8244 | 8342 | 8.45539659152 |               |
| NM_001166271 | SPATA13 6269 | 6320 | 6.78629488142 |               |
| NM_001166271 | SPATA13 7528 | 7571 | 6.87026034049 |               |
| NM_001166271 | SPATA13 3726 | 3827 | 6.87043408325 |               |
| NM_001166271 | SPATA13 2484 | 2585 | 6.87043408325 |               |
| NM_005469    | ACOT8 755    | 816  | 6.16032533198 |               |
| NM_005469    | ACOT8 537    | 563  | 7.15648148212 |               |
| NM_024531    | GPR172A 198  | 289  | 10.8224208656 |               |

|              |         |      |      |               |
|--------------|---------|------|------|---------------|
| NM_024531    | GPR172A | 1391 | 1450 | 11.0448132869 |
| NM_024531    | GPR172A | 1500 | 1561 | 11.2374583649 |
| NM_024531    | GPR172A | 297  | 392  | 11.0448132869 |
| NM_024531    | GPR172A | 1167 | 1240 | 9.23745836487 |
| NM_024531    | GPR172A | 1566 | 1635 | 10.2374583649 |
| NM_024531    | GPR172A | 577  | 642  | 11.0448132869 |
| NM_024531    | GPR172A | 1705 | 1738 | 8.23745836465 |
| NM_024531    | GPR172A | 392  | 491  | 10.8224208656 |
| NM_024531    | GPR172A | 1285 | 1375 | 10.2374583649 |
| NM_024531    | GPR172A | 830  | 1003 | 11.6968899835 |
| NM_024531    | GPR172A | 647  | 780  | 11.2374583649 |
| NM_024531    | GPR172A | 1014 | 1082 | 8.23728461456 |
| NM_024537    | CARS2   | 250  | 302  | 5.74065364603 |
| NM_024537    | CARS2   | 975  | 1060 | 6.74065364603 |
| NM_001130929 | C7orf73 | 531  | 584  | 6.79702424619 |
| NM_001130929 | C7orf73 | 130  | 230  | 9.97096684781 |
| NM_001130929 | C7orf73 | 473  | 529  | 7.80103511531 |
| NM_001130929 | C7orf73 | 413  | 457  | 6.71690263698 |
| NM_001130929 | C7orf73 | 287  | 395  | 9.12296994125 |
| NM_001130929 | C7orf73 | 713  | 835  | 7.80104184636 |
| NM_005964    | MYH10   | 7407 | 7506 | 3.26291410562 |
| NM_005964    | MYH10   | 5094 | 5140 | 3.26291410562 |
| NM_005964    | MYH10   | 2296 | 2331 | 3.2629138697  |
| NM_005964    | MYH10   | 214  | 278  | 4.84787659879 |
| NM_005964    | MYH10   | 1449 | 1570 | 5.84787660634 |
| NM_005964    | MYH10   | 2584 | 2645 | 3.2627403553  |
| NM_005964    | MYH10   | 108  | 198  | 5.84787660634 |
| NM_005964    | MYH10   | 627  | 688  | 4.84786987529 |
| NM_005964    | MYH10   | 5694 | 5749 | 3.2627403553  |
| NM_005964    | MYH10   | 6203 | 6247 | 3.25889650545 |
| NM_005964    | MYH10   | 451  | 551  | 6.26291410562 |
| NM_005964    | MYH10   | 2810 | 2851 | 3.25889650545 |
| NM_005964    | MYH10   | 6516 | 6574 | 4.2629138697  |
| NM_005964    | MYH10   | 1971 | 2068 | 6.26291410562 |
| NM_005964    | MYH10   | 3467 | 3529 | 4.84786987529 |
| NM_005964    | MYH10   | 4089 | 4154 | 3.17877489623 |
| NM_005964    | MYH10   | 3305 | 3358 | 3.2627403553  |
| NM_005964    | MYH10   | 6401 | 6451 | 3.26291410562 |
| NM_005964    | MYH10   | 6093 | 6148 | 3.25889650545 |
| NM_005964    | MYH10   | 1263 | 1319 | 4.84787637042 |
| NM_005964    | MYH10   | 1869 | 1965 | 4.26291410562 |
| NM_005964    | MYH10   | 6577 | 6655 | 4.84787660612 |
| NM_005964    | MYH10   | 4651 | 4717 | 4.2629138697  |
| NM_005964    | MYH10   | 7029 | 7211 | 5.58484220051 |
| NM_005964    | MYH10   | 2073 | 2165 | 5.26291410562 |
| NM_005964    | MYH10   | 2235 | 2293 | 3.2629138697  |
| NM_005964    | MYH10   | 983  | 1062 | 4.84787660634 |
| NM_005964    | MYH10   | 1616 | 1758 | 6.58484220051 |
| NM_005964    | MYH10   | 7315 | 7384 | 3.2629141054  |
| NM_005964    | MYH10   | 4843 | 5039 | 3.26291410562 |

|              |         |      |      |               |
|--------------|---------|------|------|---------------|
| NM_005964    | MYH10   | 6805 | 6889 | 3.26291409807 |
| NM_005964    | MYH10   | 2383 | 2485 | 4.26291410562 |
| NM_005964    | MYH10   | 741  | 958  | 6.72234572426 |
| NM_001130924 | TMEM201 | 1399 | 1465 | 10.2590314908 |
| NM_001130924 | TMEM201 | 1864 | 1913 | 10.1748922814 |
| NM_001130924 | TMEM201 | 651  | 714  | 11.2590247598 |
| NM_001130924 | TMEM201 | 907  | 971  | 10.2590314833 |
| NM_001130924 | TMEM201 | 714  | 771  | 11.2588577405 |
| NM_001130924 | TMEM201 | 2149 | 2240 | 11.2590314908 |
| NM_001130924 | TMEM201 | 1268 | 1382 | 12.5809595857 |
| NM_001130924 | TMEM201 | 141  | 268  | 11.8439939916 |
| NM_020715    | PLEKHH1 | 3853 | 3895 | 8.466523295   |
| NM_020715    | PLEKHH1 | 4714 | 4787 | 8.47054089517 |
| NM_005969    | NAP1L4  | 638  | 691  | 3.37675320268 |
| NM_005969    | NAP1L4  | 1548 | 1594 | 3.7076514928  |
| NM_005969    | NAP1L4  | 1962 | 2071 | 4.37675320291 |
| NM_005969    | NAP1L4  | 1424 | 1477 | 2.78777310201 |
| NM_005969    | NAP1L4  | 524  | 577  | 1.79178397113 |
| NM_005969    | NAP1L4  | 1694 | 1743 | 2.79179069464 |
| NM_005969    | NAP1L4  | 1788 | 1905 | 3.37675320291 |
| NM_005969    | NAP1L4  | 1021 | 1209 | 4.59914562424 |
| NM_005969    | NAP1L4  | 692  | 932  | 5.59914562424 |
| NM_001130921 | RABL2B  | 233  | 261  | 7.97437344925 |
| NM_001130921 | RABL2B  | 1667 | 1734 | 6.97437344924 |
| NM_001130921 | RABL2B  | 1994 | 2067 | 6.97419969893 |
| NM_001200001 | NOTCH2  | 366  | 407  | 11.0024422177 |
| NM_001200001 | NOTCH2  | 826  | 880  | 10.9984246175 |
| NM_018714    | COG1    | 1034 | 1110 | 6.4683653145  |
| NM_018714    | COG1    | 1285 | 1358 | 7.46835881937 |
| NM_018714    | COG1    | 243  | 281  | 6.46434795025 |
| NM_018714    | COG1    | 1929 | 2021 | 6.46835881937 |
| NM_018715    | RCC2    | 1566 | 1647 | 6.30592102865 |
| NM_018715    | RCC2    | 1348 | 1404 | 8.89088353692 |
| NM_018715    | RCC2    | 94   | 129  | 7.30591430515 |
| NM_018715    | RCC2    | 2403 | 2457 | 7.30190343603 |
| NM_018715    | RCC2    | 2032 | 2087 | 6.30592080028 |
| NM_018715    | RCC2    | 3318 | 3405 | 8.62784913109 |
| NM_018715    | RCC2    | 659  | 697  | 6.30592102865 |
| NM_018715    | RCC2    | 524  | 593  | 7.89088353692 |
| NM_018715    | RCC2    | 1482 | 1538 | 7.89087680587 |
| NM_018715    | RCC2    | 3262 | 3308 | 7.88686593675 |
| NM_018715    | RCC2    | 2897 | 2993 | 7.3059210362  |
| NM_018715    | RCC2    | 2754 | 2842 | 7.89088353692 |
| NM_018715    | RCC2    | 1647 | 1830 | 8.3059210362  |
| NM_018715    | RCC2    | 3926 | 4057 | 8.3059210362  |
| NM_018715    | RCC2    | 971  | 1054 | 8.62784913109 |
| NM_018715    | RCC2    | 1066 | 1263 | 9.89088353692 |
| NM_018715    | RCC2    | 3408 | 3551 | 8.89088353692 |
| NM_018715    | RCC2    | 1898 | 1986 | 8.3059210362  |
| NM_018715    | RCC2    | 2671 | 2736 | 7.30574728588 |

|              |          |      |      |                    |
|--------------|----------|------|------|--------------------|
| NM_018715    | RCC2     | 2997 | 3200 | 9.11327595826      |
| NM_018715    | RCC2     | 2308 | 2374 | 6.30591430515      |
| NM_018715    | RCC2     | 129  | 246  | 8.3059210362       |
| NM_018715    | RCC2     | 807  | 947  | 8.3059210362       |
| NM_033229    | TRIM15   | 440  | 483  | 4.62583759619      |
| NM_018713    | SLC30A10 |      | 1907 | 1973 4.58300187709 |
| NM_018713    | SLC30A10 |      | 271  | 382 6.58701947726  |
| NM_033224    | PURB     | 1956 | 2015 | 11.1626737185      |
| NM_033224    | PURB     | 1681 | 1743 | 10.0825521093      |
| NM_033224    | PURB     | 3916 | 4015 | 10.1666913187      |
| NM_033224    | PURB     | 7292 | 7353 | 9.0825521093       |
| NM_033224    | PURB     | 2268 | 2357 | 10.1666910828      |
| NM_001171812 | GBA      | 76   | 169  | 12.6153161824      |
| NM_001171812 | GBA      | 1709 | 1807 | 10.6153161821      |
| NM_001171812 | GBA      | 288  | 388  | 12.8377086037      |
| NM_001171812 | GBA      | 394  | 443  | 11.0303536816      |
| NM_001171812 | GBA      | 1135 | 1383 | 14.074747801       |
| NM_001171812 | GBA      | 1389 | 1691 | 14.0303536816      |
| NM_001171812 | GBA      | 1860 | 2062 | 13.1178165229      |
| NM_001171812 | GBA      | 472  | 1095 | 14.8117133952      |
| NM_001171812 | GBA      | 178  | 282  | 11.0303536816      |
| NM_001171812 | GBA      | 2104 | 2170 | 9.03034695059      |
| NM_001177358 | GPR137   | 907  | 963  | 9.6885671171       |
| NM_001177358 | GPR137   | 747  | 822  | 10.6885671171      |
| NM_001177358 | GPR137   | 1006 | 1051 | 11.6885603861      |
| NM_001177358 | GPR137   | 554  | 623  | 11.2735228868      |
| NM_001177358 | GPR137   | 661  | 721  | 10.6885603861      |
| NM_001177358 | GPR137   | 237  | 307  | 10.6885671096      |
| NM_018719    | CDCA7L   | 318  | 399  | 9.40570560047      |
| NM_018719    | CDCA7L   | 907  | 978  | 7.40553185015      |
| NM_003255    | TIMP2    | 1000 | 1065 | 4.76393040295      |
| NM_003255    | TIMP2    | 514  | 572  | 4.76393040295      |
| NM_003255    | TIMP2    | 779  | 861  | 5.08585849784      |
| NM_003255    | TIMP2    | 419  | 491  | 4.76393040295      |
| NM_003255    | TIMP2    | 2659 | 2743 | 3.7639236719       |
| NM_003255    | TIMP2    | 2515 | 2561 | 3.76375665263      |
| NM_003255    | TIMP2    | 2873 | 2925 | 3.75991280278      |
| NM_003255    | TIMP2    | 3411 | 3473 | 4.34889290367      |
| NM_003255    | TIMP2    | 2952 | 3000 | 2.75991280278      |
| NM_003255    | TIMP2    | 3307 | 3371 | 3.75991280278      |
| NM_003255    | TIMP2    | 3011 | 3184 | 5.76393040295      |
| NM_003255    | TIMP2    | 2053 | 2107 | 3.75991280278      |
| NM_003255    | TIMP2    | 583  | 762  | 5.57128532501      |
| NM_003255    | TIMP2    | 3479 | 3628 | 4.76393040295      |
| NM_021953    | FOXM1    | 2202 | 2271 | 9.06859212813      |
| NM_021953    | FOXM1    | 2095 | 2171 | 6.74649028293      |
| NM_021953    | FOXM1    | 2403 | 2457 | 6.66252482386      |
| NM_021953    | FOXM1    | 1973 | 2070 | 9.74666403325      |
| NM_021953    | FOXM1    | 2482 | 2548 | 7.7466640257       |
| NM_021953    | FOXM1    | 939  | 993  | 6.74665730219      |

|           |          |       |       |                    |
|-----------|----------|-------|-------|--------------------|
| NM_021953 | FOXM1    | 1897  | 1952  | 7.74665730219      |
| NM_021953 | FOXM1    | 2554  | 2622  | 6.7466640257       |
| NM_021953 | FOXM1    | 2296  | 2379  | 8.74666403325      |
| NM_021953 | FOXM1    | 1013  | 1167  | 9.91658903469      |
| NM_021953 | FOXM1    | 826   | 929   | 9.33162653397      |
| NM_021953 | FOXM1    | 592   | 740   | 9.06859212813      |
| NM_021953 | FOXM1    | 2945  | 3112  | 9.74666403325      |
| NM_021953 | FOXM1    | 1254  | 1373  | 9.06859212813      |
| NM_021953 | FOXM1    | 3265  | 3433  | 9.5540189553       |
| NM_032799 | ZDHHC12  | 69    | 138   | 9.42793021063      |
| NM_032799 | ZDHHC12  | 588   | 673   | 11.4279302109      |
| NM_032799 | ZDHHC12  | 299   | 362   | 10.4277564605      |
| NM_032799 | ZDHHC12  | 190   | 298   | 12.0128927116      |
| NM_032799 | ZDHHC12  | 460   | 540   | 11.0128927116      |
| NM_032796 | SYAP1    | 896   | 927   | 5.35114558233      |
| NM_032796 | SYAP1    | 2620  | 2761  | 4.7661763581       |
| NM_032796 | SYAP1    | 713   | 749   | 4.76216548898      |
| NM_032797 | AIFM2    | 979   | 1041  | 6.5515188412       |
| NM_032797 | AIFM2    | 1042  | 1086  | 7.13665509224      |
| NM_032797 | AIFM2    | 407   | 497   | 6.55169259152      |
| NM_032797 | AIFM2    | 320   | 399   | 7.13665509224      |
| NM_032797 | AIFM2    | 2151  | 2233  | 6.55169258397      |
| NM_032797 | AIFM2    | 197   | 255   | 5.55169259152      |
| NM_032797 | AIFM2    | 1119  | 1168  | 6.54767499135      |
| NM_032797 | AIFM2    | 588   | 727   | 5.55169259152      |
| NM_176815 | DHFRL1   | 374   | 411   | 9.64861313941      |
| NM_032790 | ORAI1    | 919   | 978   | 11.111003588       |
| NM_032790 | ORAI1    | 700   | 784   | 11.1150211806      |
| NM_032790 | ORAI1    | 988   | 1062  | 11.111003588       |
| NM_014814 | PSMD6    | 1134  | 1209  | 4.83633412245      |
| NM_014814 | PSMD6    | 522   | 580   | 4.25136489068      |
| NM_014814 | PSMD6    | 939   | 1092  | 6.05872654379      |
| NM_014814 | PSMD6    | 147   | 212   | 3.25137138581      |
| NM_014814 | PSMD6    | 583   | 858   | 7.49929913517      |
| NM_014810 | CEP350   | 13318 | 13358 | 5.98246895412      |
| NM_014810 | CEP350   | 8888  | 8974  | 5.98246895412      |
| NM_014810 | CEP350   | 8074  | 8151  | 7.0666081635       |
| NM_014810 | CEP350   | 4823  | 4874  | 7.06643441318      |
| NM_014810 | CEP350   | 6958  | 7007  | 7.64755306405      |
| NM_014810 | CEP350   | 2670  | 2725  | 6.98246895412      |
| NM_014810 | CEP350   | 10976 | 11012 | 5.98246895412      |
| NM_014810 | CEP350   | 12811 | 12881 | 6.98246895412      |
| NM_014810 | CEP350   | 542   | 585   | 7.06643441318      |
| NM_014810 | CEP350   | 7927  | 7984  | 5.98246895412      |
| NM_014813 | LRIG2    | 1820  | 1852  | 8.50246146194      |
| NM_014813 | LRIG2    | 2626  | 2734  | 8.58660043541      |
| NM_005348 | HSP90AA1 |       | 136   | 3033 8.89635513865 |
| NM_005347 | HSPA5    | 47    | 612   | 6.46313501468      |
| NM_005347 | HSPA5    | 633   | 2537  | 8.74431676723      |
| NM_005347 | HSPA5    | 3060  | 3118  | 1.74414301691      |

|              |        |      |      |               |
|--------------|--------|------|------|---------------|
| NM_005346    | HSPA1B | 36   | 98   | 2.96927808847 |
| NM_005346    | HSPA1B | 1474 | 1522 | 3.05341729786 |
| NM_005346    | HSPA1B | 120  | 190  | 5.05341729785 |
| NM_005346    | HSPA1B | 826  | 860  | 3.96927808847 |
| NM_005346    | HSPA1B | 554  | 632  | 4.63837979858 |
| NM_005346    | HSPA1B | 892  | 946  | 4.05324354754 |
| NM_005346    | HSPA1B | 1253 | 1312 | 4.63837979858 |
| NM_005346    | HSPA1B | 1523 | 1567 | 3.04939969768 |
| NM_005346    | HSPA1B | 2287 | 2365 | 4.05341729786 |
| NM_005346    | HSPA1B | 1370 | 1425 | 4.05341729786 |
| NM_005346    | HSPA1B | 1654 | 1713 | 4.05324354754 |
| NM_005346    | HSPA1B | 448  | 525  | 4.63837979858 |
| NM_005346    | HSPA1B | 795  | 818  | 2.96927808847 |
| NM_005346    | HSPA1B | 648  | 787  | 4.63837979858 |
| NM_005346    | HSPA1B | 1107 | 1209 | 3.05341729785 |
| NM_005346    | HSPA1B | 2121 | 2244 | 5.86077221992 |
| NM_005346    | HSPA1B | 1937 | 2071 | 4.05341729786 |
| NM_005345    | HSPA1A | 1668 | 1740 | 4.25135643956 |
| NM_005345    | HSPA1A | 1397 | 1480 | 4.8363191762  |
| NM_005345    | HSPA1A | 1501 | 1549 | 4.25135667547 |
| NM_005345    | HSPA1A | 919  | 973  | 4.25134994442 |
| NM_005345    | HSPA1A | 475  | 551  | 4.25135667547 |
| NM_005345    | HSPA1A | 1280 | 1335 | 4.8363191762  |
| NM_005345    | HSPA1A | 581  | 659  | 4.8363191762  |
| NM_005345    | HSPA1A | 675  | 814  | 4.8363191762  |
| NM_005345    | HSPA1A | 2166 | 2257 | 5.8363191762  |
| NM_005345    | HSPA1A | 1964 | 2098 | 4.8363191762  |
| NM_001005476 | PKP4   | 2235 | 2299 | 2.90712070509 |
| NM_001005476 | PKP4   | 2092 | 2144 | 2.90712046939 |
| NM_001005476 | PKP4   | 2368 | 2449 | 2.90310310514 |
| NM_001005476 | PKP4   | 4204 | 4248 | 3.90711397426 |
| NM_001005476 | PKP4   | 3780 | 3822 | 3.90712070531 |
| NM_001005476 | PKP4   | 929  | 1048 | 4.49208320603 |
| NM_001005476 | PKP4   | 2161 | 2229 | 3.90310310514 |
| NM_001005476 | PKP4   | 3282 | 3319 | 2.90310310514 |
| NM_001005476 | PKP4   | 1536 | 1589 | 3.90711397426 |
| NM_001005476 | PKP4   | 3436 | 3509 | 2.90310310514 |
| NM_001005476 | PKP4   | 3860 | 3972 | 5.71447562737 |
| NM_001005476 | PKP4   | 2661 | 2763 | 4.49208319848 |
| NM_001005476 | PKP4   | 1635 | 1687 | 2.82298149593 |
| NM_001005476 | PKP4   | 1941 | 2001 | 2.82298149593 |
| NM_001005476 | PKP4   | 501  | 633  | 4.49208320603 |
| NM_001005476 | PKP4   | 780  | 892  | 4.90712070531 |
| NM_001005476 | PKP4   | 1287 | 1391 | 3.90712070531 |
| NM_001005476 | PKP4   | 3551 | 3760 | 5.49208320603 |
| NM_001005476 | PKP4   | 2462 | 2586 | 3.90712070531 |
| NM_005342    | HMGB3  | 289  | 327  | 4.36267151998 |
| NM_005342    | HMGB3  | 1044 | 1104 | 3.35866065086 |
| NM_005342    | HMGB3  | 544  | 605  | 4.35866065086 |
| NM_005342    | HMGB3  | 192  | 265  | 3.36267825103 |

|              |          |      |      |               |               |
|--------------|----------|------|------|---------------|---------------|
| NM_005340    | HINT1    | 145  | 216  | 4.56942003784 |               |
| NM_005340    | HINT1    | 522  | 587  | 4.08399321067 |               |
| NM_005340    | HINT1    | 319  | 513  | 6.51695261794 |               |
| NM_003258    | TK1      | 1028 | 1078 | 8.75267882458 |               |
| NM_003258    | TK1      | 560  | 593  | 9.33764132552 |               |
| NM_003258    | TK1      | 748  | 784  | 9.33746757521 |               |
| NM_003258    | TK1      | 1223 | 1293 | 10.3376413255 |               |
| NM_003258    | TK1      | 907  | 981  | 8.75250507449 |               |
| NM_003258    | TK1      | 160  | 216  | 9.33763459447 |               |
| NM_003258    | TK1      | 326  | 392  | 7.66853961542 |               |
| NM_003258    | TK1      | 1079 | 1182 | 7.75267858888 |               |
| NM_003258    | TK1      | 273  | 323  | 8.74866122463 |               |
| NM_001112726 | KIAA0284 |      | 4336 | 4443          | 8.60847410192 |
| NM_001112726 | KIAA0284 |      | 3051 | 3121          | 7.60847409437 |
| NM_001112726 | KIAA0284 |      | 6468 | 6520          | 7.60847409437 |
| NM_001112726 | KIAA0284 |      | 6006 | 6083          | 8.60445650175 |
| NM_001112726 | KIAA0284 |      | 2724 | 2820          | 8.60847409437 |
| NM_001112726 | KIAA0284 |      | 6083 | 6157          | 7.60847410191 |
| NM_001112726 | KIAA0284 |      | 5873 | 5934          | 8.60847410192 |
| NM_001112726 | KIAA0284 |      | 6524 | 6689          | 11.0679057206 |
| NM_001112726 | KIAA0284 |      | 352  | 498           | 9.19343660264 |
| NM_001112726 | KIAA0284 |      | 1034 | 1105          | 9.60847410192 |
| NM_001112726 | KIAA0284 |      | 4066 | 4176          | 7.60847410192 |
| NM_001112726 | KIAA0284 |      | 1989 | 2058          | 7.6083003516  |
| NM_001099293 | KIF4B    | 4211 | 4239 | 9.28636880138 |               |
| NM_001099293 | KIF4B    | 3269 | 3313 | 10.3664904106 |               |
| NM_001099293 | KIF4B    | 536  | 587  | 9.37050127971 |               |
| NM_001099293 | KIF4B    | 391  | 436  | 10.3703342604 |               |
| NM_012413    | QPCT     | 838  | 897  | 12.7690439563 |               |
| NM_012413    | QPCT     | 1074 | 1145 | 13.5060095504 |               |
| NM_012413    | QPCT     | 917  | 967  | 12.0999422462 |               |
| NM_012413    | QPCT     | 973  | 1039 | 12.1840812196 |               |
| NM_012413    | QPCT     | 1356 | 1409 | 12.7650263561 |               |
| NM_012413    | QPCT     | 1175 | 1325 | 13.7690439563 |               |
| NM_012413    | QPCT     | 575  | 717  | 14.354006457  |               |
| NM_012412    | H2AFV    | 941  | 1035 | 6.3076281283  |               |
| NM_012412    | H2AFV    | 1213 | 1318 | 5.98570003341 |               |
| NM_012412    | H2AFV    | 131  | 774  | 9.79305495547 |               |
| NM_001197234 | BTN2A1   | 438  | 498  | 6.07350091493 |               |
| NM_001197234 | BTN2A1   | 233  | 307  | 7.07350091493 |               |
| NM_001197234 | BTN2A1   | 320  | 389  | 6.07751827919 |               |
| NM_001197234 | BTN2A1   | 120  | 195  | 7.07751851511 |               |
| NM_012141    | INTS6    | 2557 | 2591 | 5.00298220927 |               |
| NM_012141    | INTS6    | 840  | 881  | 5.08310381849 |               |
| NM_012416    | RANBP6   | 1537 | 1588 | 6.60242326595 |               |
| NM_012414    | RAB3GAP2 |      | 1278 | 1324          | 8.11535790933 |
| NM_012414    | RAB3GAP2 |      | 2570 | 2622          | 7.61051701782 |
| NM_012414    | RAB3GAP2 |      | 506  | 566           | 7.61453438207 |
| NM_012414    | RAB3GAP2 |      | 2784 | 2877          | 8.61452788694 |
| NM_012414    | RAB3GAP2 |      | 5994 | 6036          | 6.53039540861 |

|              |          |      |      |               |               |
|--------------|----------|------|------|---------------|---------------|
| NM_012414    | RAB3GAP2 |      | 2073 | 2125          | 7.61453438207 |
| NM_012414    | RAB3GAP2 |      | 7157 | 7266          | 7.61453461799 |
| NM_012414    | RAB3GAP2 |      | 2126 | 2218          | 8.93646271288 |
| NM_012414    | RAB3GAP2 |      | 2018 | 2071          | 6.53039540861 |
| NM_012414    | RAB3GAP2 |      | 2640 | 2705          | 8.19547951854 |
| NM_012414    | RAB3GAP2 |      | 277  | 390           | 8.61453461799 |
| NM_012414    | RAB3GAP2 |      | 2343 | 2532          | 9.78445961943 |
| NM_012414    | RAB3GAP2 |      | 6424 | 6551          | 6.61453461799 |
| NM_012414    | RAB3GAP2 |      | 5390 | 5461          | 6.61453461799 |
| NM_012414    | RAB3GAP2 |      | 2951 | 3014          | 6.61436086767 |
| NM_007005    | TLE4     | 2815 | 2847 | 9.33901273106 |               |
| NM_001017420 | ESCO2    | 1629 | 1698 | 7.37905268857 |               |
| NM_001114092 | THUMPD3  | 175  | 208  | 7.13012594343 |               |
| NM_001114092 | THUMPD3  | 1078 | 1143 | 7.71909931327 |               |
| NM_001114092 | THUMPD3  | 1030 | 1073 | 8.13396979328 |               |
| NM_001114092 | THUMPD3  | 363  | 424  | 6.05000433422 |               |
| NM_001173524 | TROVE2   | 427  | 502  | 6.51088609753 |               |
| NM_001173524 | TROVE2   | 973  | 1069 | 6.51088609753 |               |
| NM_001173524 | TROVE2   | 709  | 754  | 7.51088609753 |               |
| NM_001173524 | TROVE2   | 2438 | 2478 | 6.50686849736 |               |
| NM_001173524 | TROVE2   | 1506 | 1555 | 6.42674688815 |               |
| NM_001173524 | TROVE2   | 2654 | 2698 | 6.50686849736 |               |
| NM_001173524 | TROVE2   | 1326 | 1426 | 6.51088609753 |               |
| NM_001173524 | TROVE2   | 2721 | 2829 | 6.51088609753 |               |
| NM_001173524 | TROVE2   | 1811 | 1880 | 7.51088609753 |               |
| NM_001173524 | TROVE2   | 1892 | 1987 | 8.09584859825 |               |
| NM_001173524 | TROVE2   | 647  | 693  | 7.01170938887 |               |
| NM_001173524 | TROVE2   | 1446 | 1504 | 7.51088586161 |               |
| NM_001017423 | ALDH18A1 |      | 1762 | 2175          | 8.44348491558 |
| NM_001017423 | ALDH18A1 |      | 3049 | 3095          | 2.85834866454 |
| NM_001017423 | ALDH18A1 |      | 2182 | 2575          | 7.76541301047 |
| NM_001017423 | ALDH18A1 |      | 3307 | 3429          | 5.18045050974 |
| NM_001017423 | ALDH18A1 |      | 959  | 1246          | 8.14392463372 |
| NM_001017423 | ALDH18A1 |      | 786  | 954           | 6.31795403349 |
| NM_001017423 | ALDH18A1 |      | 1338 | 1482          | 6.558962133   |
| NM_001017423 | ALDH18A1 |      | 1482 | 1723          | 7.85852241486 |
| NM_001017423 | ALDH18A1 |      | 15   | 149           | 4.44348491558 |
| NM_001017423 | ALDH18A1 |      | 2647 | 2901          | 6.76541301047 |
| NM_001017423 | ALDH18A1 |      | 280  | 485           | 7.25083983764 |
| NM_001017423 | ALDH18A1 |      | 497  | 769           | 6.76541301047 |
| NM_182503    | ADAT2    | 392  | 492  | 7.54009981194 |               |
| NM_182507    | KRT80    | 3517 | 3583 | 6.61305212895 |               |
| NM_182507    | KRT80    | 3721 | 3787 | 8.61305212917 |               |
| NM_182507    | KRT80    | 1164 | 1264 | 9.61305212917 |               |
| NM_182507    | KRT80    | 1493 | 1546 | 7.52891291978 |               |
| NM_182507    | KRT80    | 452  | 538  | 8.93498022405 |               |
| NM_182507    | KRT80    | 260  | 302  | 6.61304539811 |               |
| NM_182507    | KRT80    | 650  | 817  | 8.93498022405 |               |
| NM_182507    | KRT80    | 1683 | 1913 | 8.61305212917 |               |
| NM_182507    | KRT80    | 3165 | 3237 | 7.52891291978 |               |



|           |        |      |      |               |
|-----------|--------|------|------|---------------|
| NM_182507 | KRT80  | 602  | 633  | 6.61287837885 |
| NM_182507 | KRT80  | 2863 | 2945 | 8.19801462989 |
| NM_017940 | NBPF1  | 4127 | 4186 | 7.75182653169 |
| NM_017940 | NBPF1  | 4246 | 4295 | 7.75182653169 |
| NM_017940 | NBPF1  | 4022 | 4109 | 8.75200028201 |
| NM_017940 | NBPF1  | 3962 | 4000 | 7.75199355096 |
| NM_017940 | NBPF1  | 5113 | 5180 | 6.75200028201 |
| NM_017940 | NBPF1  | 4489 | 4544 | 6.74798268184 |
| NM_058167 | UBE2J2 | 1177 | 1254 | 8.43662097129 |
| NM_058167 | UBE2J2 | 687  | 789  | 5.62926604924 |
| NM_058167 | UBE2J2 | 1115 | 1166 | 6.21422854973 |
| NM_058167 | UBE2J2 | 1397 | 1448 | 5.62909229892 |
| NM_058167 | UBE2J2 | 856  | 920  | 6.21422854241 |
| NM_058167 | UBE2J2 | 201  | 260  | 4.62524844906 |
| NM_058167 | UBE2J2 | 447  | 631  | 8.08869766787 |
| NM_058163 | TSR2   | 1195 | 1255 | 6.46066511608 |
| NM_058163 | TSR2   | 407  | 448  | 5.45664775183 |
| NM_058163 | TSR2   | 609  | 672  | 5.46066511608 |
| NM_001068 | TOP2B  | 2842 | 2896 | 3.29962425176 |
| NM_001068 | TOP2B  | 2723 | 2775 | 4.38376346115 |
| NM_001068 | TOP2B  | 2392 | 2457 | 4.96872595432 |
| NM_001068 | TOP2B  | 4822 | 4874 | 3.37974586098 |
| NM_001068 | TOP2B  | 4188 | 4243 | 4.9647083617  |
| NM_001068 | TOP2B  | 4972 | 5075 | 6.19111838321 |
| NM_001068 | TOP2B  | 3625 | 3691 | 4.29962425176 |
| NM_001068 | TOP2B  | 313  | 408  | 4.38376346115 |
| NM_001068 | TOP2B  | 2571 | 2718 | 5.70569155604 |
| NM_001069 | TUBB2A | 1167 | 1235 | 4.99755250088 |
| NM_001069 | TUBB2A | 678  | 740  | 6.00157010105 |
| NM_001069 | TUBB2A | 227  | 371  | 8.00157010105 |
| NM_001069 | TUBB2A | 1279 | 1341 | 5.00157010105 |
| NM_001069 | TUBB2A | 1064 | 1134 | 5.00157010105 |
| NM_001069 | TUBB2A | 1389 | 1562 | 7.58653260178 |
| NM_001069 | TUBB2A | 943  | 994  | 4.99755250088 |
| NM_004766 | COPB2  | 1840 | 1893 | 4.81912181915 |
| NM_004766 | COPB2  | 2884 | 3000 | 7.72601265068 |
| NM_004766 | COPB2  | 472  | 541  | 6.40408455579 |
| NM_004766 | COPB2  | 2108 | 2163 | 4.81912205507 |
| NM_004766 | COPB2  | 1254 | 1339 | 5.81912205507 |
| NM_004766 | COPB2  | 2671 | 2736 | 6.14105014996 |
| NM_004766 | COPB2  | 149  | 279  | 7.14105014996 |
| NM_004766 | COPB2  | 595  | 721  | 7.90658489632 |
| NM_004766 | COPB2  | 384  | 463  | 6.14105014996 |
| NM_004766 | COPB2  | 546  | 594  | 4.81912205506 |
| NM_004766 | COPB2  | 2746 | 2883 | 7.51956177321 |
| NM_004766 | COPB2  | 967  | 1100 | 6.81912205507 |
| NM_004766 | COPB2  | 286  | 381  | 7.51956177321 |
| NM_004766 | COPB2  | 1344 | 1826 | 9.17667405969 |
| NM_004766 | COPB2  | 1901 | 2090 | 6.98904705651 |
| NM_004766 | COPB2  | 745  | 851  | 6.62647697713 |

|           |        |      |      |               |
|-----------|--------|------|------|---------------|
| NM_004766 | COPB2  | 1117 | 1252 | 6.40408455579 |
| NM_004766 | COPB2  | 3026 | 3129 | 5.81912205507 |
| NM_004766 | COPB2  | 2203 | 2566 | 7.72601265068 |
| NM_004766 | COPB2  | 859  | 966  | 6.14105014996 |
| NM_001063 | TF     | 260  | 496  | 2.50501985807 |
| NM_001063 | TF     | 1373 | 2566 | 5.23371783626 |
| NM_001063 | TF     | 504  | 1372 | 4.73328884575 |
| NM_004762 | CYTH1  | 662  | 721  | 4.65525028507 |
| NM_001067 | TOP2A  | 931  | 1021 | 6.62485105856 |
| NM_001067 | TOP2A  | 4231 | 4334 | 4.20981355929 |
| NM_001067 | TOP2A  | 1021 | 1072 | 4.20579595911 |
| NM_001067 | TOP2A  | 1356 | 1403 | 4.62484432751 |
| NM_001067 | TOP2A  | 675  | 717  | 3.62467730825 |
| NM_001067 | TOP2A  | 2361 | 2433 | 4.62485105856 |
| NM_001067 | TOP2A  | 1087 | 1202 | 6.32529077671 |
| NM_001067 | TOP2A  | 411  | 466  | 3.62467730825 |
| NM_001067 | TOP2A  | 5344 | 5459 | 5.43220598062 |
| NM_001067 | TOP2A  | 339  | 410  | 4.94677915345 |
| NM_001067 | TOP2A  | 3365 | 3440 | 4.94677915345 |
| NM_001067 | TOP2A  | 724  | 812  | 4.94677915345 |
| NM_001067 | TOP2A  | 79   | 161  | 3.62485105856 |
| NM_001067 | TOP2A  | 835  | 882  | 4.20981355929 |
| NM_001067 | TOP2A  | 1424 | 1491 | 2.62485105856 |
| NM_001067 | TOP2A  | 1917 | 1961 | 4.20579595911 |
| NM_001067 | TOP2A  | 4388 | 4415 | 2.62484432751 |
| NM_001067 | TOP2A  | 4931 | 5070 | 6.62485105856 |
| NM_001067 | TOP2A  | 1757 | 1887 | 6.20981355929 |
| NM_001067 | TOP2A  | 5578 | 5668 | 4.94677915345 |
| NM_001067 | TOP2A  | 2637 | 3003 | 7.66924517792 |
| NM_001067 | TOP2A  | 5473 | 5543 | 4.62484432751 |
| NM_001067 | TOP2A  | 1221 | 1345 | 5.79477606001 |
| NM_001067 | TOP2A  | 4641 | 4856 | 6.62485105856 |
| NM_001067 | TOP2A  | 4473 | 4608 | 5.79477606001 |
| NM_001067 | TOP2A  | 553  | 630  | 3.62485105856 |
| NM_001067 | TOP2A  | 2054 | 2311 | 7.48283205369 |
| NM_001067 | TOP2A  | 3016 | 3301 | 7.66924517792 |
| NM_001067 | TOP2A  | 162  | 279  | 5.43220598062 |
| NM_001067 | TOP2A  | 4131 | 4231 | 3.62485105856 |
| NM_001067 | TOP2A  | 5099 | 5185 | 4.20579595911 |
| NM_001067 | TOP2A  | 2457 | 2623 | 5.94677915345 |
| NM_001067 | TOP2A  | 1615 | 1744 | 5.43220598062 |
| NM_001067 | TOP2A  | 3442 | 3764 | 5.79477606001 |
| NM_004760 | STK17A | 991  | 1101 | 8.95510814365 |
| NM_004760 | STK17A | 1514 | 1560 | 7.21412494931 |
| NM_004760 | STK17A | 1623 | 1684 | 7.21814254194 |
| NM_004760 | STK17A | 436  | 620  | 8.44053497082 |
| NM_004760 | STK17A | 1375 | 1501 | 9.0926116674  |
| NM_004760 | STK17A | 624  | 925  | 10.0926116674 |
| NM_004760 | STK17A | 1206 | 1312 | 7.95510814365 |
| NM_004761 | RGL2   | 1398 | 1436 | 6.92830910555 |

|           |          |      |      |               |               |
|-----------|----------|------|------|---------------|---------------|
| NM_022371 | TOR3A    | 1163 | 1215 | 8.67712426614 |               |
| NM_022371 | TOR3A    | 517  | 563  | 8.94015867198 |               |
| NM_022371 | TOR3A    | 1780 | 1839 | 6.27105696187 |               |
| NM_022371 | TOR3A    | 1273 | 1327 | 7.94015867198 |               |
| NM_022371 | TOR3A    | 1956 | 2007 | 7.3551894402  |               |
| NM_022371 | TOR3A    | 150  | 217  | 7.35519617125 |               |
| NM_022371 | TOR3A    | 987  | 1150 | 9.35519617125 |               |
| NM_022371 | TOR3A    | 1526 | 1626 | 9.16255109331 |               |
| NM_022371 | TOR3A    | 625  | 767  | 9.5251211727  |               |
| NM_022371 | TOR3A    | 420  | 514  | 8.35519617125 |               |
| NM_022371 | TOR3A    | 300  | 417  | 7.94015867198 |               |
| NM_022371 | TOR3A    | 767  | 971  | 9.67712426614 |               |
| NM_022371 | TOR3A    | 1351 | 1465 | 9.5251211727  |               |
| NM_018323 | PI4K2B   | 1303 | 1398 | 8.45449795177 |               |
| NM_018323 | PI4K2B   | 1838 | 1886 | 7.8695354435  |               |
| NM_018323 | PI4K2B   | 2907 | 2975 | 7.86953545105 |               |
| NM_018323 | PI4K2B   | 1598 | 1670 | 6.86551785088 |               |
| NM_022373 | HERPUD2  | 722  | 765  | 6.38731800134 |               |
| NM_022373 | HERPUD2  | 1959 | 2099 | 6.39133560151 |               |
| NM_022373 | HERPUD2  | 516  | 600  | 6.39133559396 |               |
| NM_022373 | HERPUD2  | 1461 | 1573 | 7.61372802285 |               |
| NM_022373 | HERPUD2  | 600  | 688  | 6.80637310057 |               |
| NM_006733 | CENPI    | 1144 | 1205 | 9.11979568591 |               |
| NM_006733 | CENPI    | 1772 | 1847 | 9.1197889624  |               |
| NM_006733 | CENPI    | 176  | 219  | 9.11979569345 |               |
| NM_006733 | CENPI    | 2056 | 2093 | 8.11577809328 |               |
| NM_006733 | CENPI    | 754  | 825  | 10.4417170573 |               |
| NM_006733 | CENPI    | 1432 | 1532 | 8.1197889624  |               |
| NM_004242 | HMG3     | 414  | 471  | 3.29929048983 |               |
| NM_004242 | HMG3     | 490  | 538  | 3.80028753148 |               |
| NM_004242 | HMG3     | 246  | 304  | 2.29929048983 |               |
| NM_004242 | HMG3     | 733  | 793  | 4.29946424014 |               |
| NM_004242 | HMG3     | 545  | 589  | 3.29929048983 |               |
| NM_000447 | PSEN2    | 943  | 975  | 9.12552339459 |               |
| NM_000447 | PSEN2    | 831  | 862  | 9.20948885366 |               |
| NM_000447 | PSEN2    | 1603 | 1657 | 9.2056450038  |               |
| NM_000447 | PSEN2    | 1319 | 1365 | 9.2056450038  |               |
| NM_000447 | PSEN2    | 1684 | 1755 | 8.20966260397 |               |
| NM_018321 | BRIX1    | 222  | 285  | 3.57627181476 |               |
| NM_018321 | BRIX1    | 453  | 521  | 3.57627181476 |               |
| NM_018321 | BRIX1    | 407  | 447  | 5.07709511364 |               |
| NM_018321 | BRIX1    | 184  | 219  | 5.07709511364 |               |
| NM_018321 | BRIX1    | 645  | 726  | 5.16123432303 |               |
| NM_003920 | TIMELESS |      | 1586 | 1640          | 5.44700683561 |
| NM_003920 | TIMELESS |      | 737  | 772           | 5.44298947135 |
| NM_003920 | TIMELESS |      | 2390 | 2455          | 7.03196957225 |
| NM_003920 | TIMELESS |      | 3992 | 4046          | 6.44700706398 |
| NM_003920 | TIMELESS |      | 1478 | 1569          | 7.03179582193 |
| NM_003920 | TIMELESS |      | 2947 | 2996          | 6.44700706398 |
| NM_003920 | TIMELESS |      | 112  | 164           | 5.44700683561 |

|           |              |      |      |               |
|-----------|--------------|------|------|---------------|
| NM_003920 | TIMELESS     | 2631 | 2715 | 6.44298947135 |
| NM_003920 | TIMELESS     | 408  | 463  | 5.44683332121 |
| NM_003920 | TIMELESS     | 2235 | 2308 | 7.44700707153 |
| NM_003920 | TIMELESS     | 2568 | 2614 | 6.36286786214 |
| NM_003920 | TIMELESS     | 3625 | 3713 | 5.44700707152 |
| NM_003920 | TIMELESS     | 1149 | 1246 | 7.44700707153 |
| NM_003920 | TIMELESS     | 3909 | 3990 | 5.44700707152 |
| NM_003920 | TIMELESS     | 244  | 323  | 6.44700683561 |
| NM_003920 | TIMELESS     | 4193 | 4257 | 5.44700034047 |
| NM_003920 | TIMELESS     | 817  | 978  | 8.25436199359 |
| NM_003920 | TIMELESS     | 2754 | 2895 | 7.44700707153 |
| NM_003920 | TIMELESS     | 1657 | 1748 | 5.44700707153 |
| NM_003920 | TIMELESS     | 552  | 669  | 7.44700707153 |
| NM_003920 | TIMELESS     | 1377 | 1470 | 6.44683332121 |
| NM_006876 | B3GNT1 279   | 372  |      | 9.11806133736 |
| NM_006876 | B3GNT1 1346  | 1420 |      | 9.11806133736 |
| NM_006876 | B3GNT1 69    | 111  |      | 8.11788758704 |
| NM_006876 | B3GNT1 671   | 714  |      | 8.11788758704 |
| NM_006876 | B3GNT1 202   | 271  |      | 9.70302383808 |
| NM_006876 | B3GNT1 728   | 900  |      | 10.4399894322 |
| NM_006876 | B3GNT1 1091  | 1281 |      | 10.4399894322 |
| NM_006876 | B3GNT1 377   | 523  |      | 9.43998943225 |
| NM_006876 | B3GNT1 1739  | 1967 |      | 10.1180613374 |
| NM_006876 | B3GNT1 1443  | 1709 |      | 11.577492956  |
| NM_020936 | DDX55 946    | 1030 |      | 6.7261541341  |
| NM_014887 | N4BP2L2 856  | 905  |      | 4.82342398437 |
| NM_014887 | N4BP2L2 702  | 778  |      | 5.82342398437 |
| NM_014887 | N4BP2L2 1870 | 1956 |      | 6.41239735421 |
| NM_014887 | N4BP2L2 1150 | 1234 |      | 5.827441577   |
| NM_014887 | N4BP2L2 1801 | 1832 |      | 4.82342398437 |
| NM_014887 | N4BP2L2 1641 | 1735 |      | 4.827441577   |
| NM_004582 | RABGGTB 84   | 147  |      | 4.05002605412 |
| NM_004582 | RABGGTB 1136 | 1190 |      | 4.371954149   |
| NM_004582 | RABGGTB 933  | 995  |      | 3.63498855484 |
| NM_004582 | RABGGTB 1038 | 1104 |      | 2.0500258182  |
| NM_004582 | RABGGTB 314  | 369  |      | 4.371954149   |
| NM_004582 | RABGGTB 818  | 906  |      | 4.63498855484 |
| NM_004582 | RABGGTB 369  | 466  |      | 4.85738097617 |
| NM_004582 | RABGGTB 148  | 300  |      | 5.50945767275 |
| NM_004582 | RABGGTB 498  | 660  |      | 6.21995105556 |
| NM_004582 | RABGGTB 698  | 784  |      | 4.05002605412 |
| NM_004583 | RAB5C 1240   | 1292 |      | 2.13140408212 |
| NM_004583 | RAB5C 927    | 991  |      | 4.1354216823  |
| NM_004583 | RAB5C 193    | 244  |      | 4.1354216823  |
| NM_004583 | RAB5C 1018   | 1094 |      | 3.1354216823  |
| NM_004583 | RAB5C 257    | 335  |      | 4.45734977718 |
| NM_004583 | RAB5C 1094   | 1158 |      | 4.72038418302 |
| NM_004583 | RAB5C 1588   | 1641 |      | 3.72038417547 |
| NM_004583 | RAB5C 1298   | 1342 |      | 4.45734954126 |
| NM_004583 | RAB5C 340    | 487  |      | 5.59485330093 |

|           |         |      |      |               |
|-----------|---------|------|------|---------------|
| NM_004583 | RAB5C   | 1482 | 1561 | 4.72038418302 |
| NM_004583 | RAB5C   | 506  | 784  | 5.72038418302 |
| NM_020151 | STARD7  | 3095 | 3172 | 5.4875454143  |
| NM_020151 | STARD7  | 32   | 94   | 6.16561731941 |
| NM_020151 | STARD7  | 1941 | 2017 | 5.75057982013 |
| NM_020151 | STARD7  | 185  | 228  | 4.16561731941 |
| NM_020151 | STARD7  | 531  | 606  | 4.16544356909 |
| NM_020151 | STARD7  | 2374 | 2450 | 4.16561731941 |
| NM_020151 | STARD7  | 2516 | 2575 | 3.16561708349 |
| NM_020151 | STARD7  | 306  | 365  | 4.16561731919 |
| NM_020151 | STARD7  | 2693 | 2804 | 4.75057982013 |
| NM_020151 | STARD7  | 1237 | 1276 | 4.08147811003 |
| NM_020151 | STARD7  | 1007 | 1040 | 4.08147811003 |
| NM_020151 | STARD7  | 3241 | 3320 | 5.16561731941 |
| NM_020151 | STARD7  | 1277 | 1330 | 4.75057981991 |
| NM_020151 | STARD7  | 2170 | 2276 | 5.16561731941 |
| NM_020151 | STARD7  | 647  | 762  | 4.75057982013 |
| NM_020151 | STARD7  | 1809 | 1902 | 6.16561731941 |
| NM_020151 | STARD7  | 1390 | 1465 | 3.16561731941 |
| NM_020151 | STARD7  | 873  | 980  | 5.97297224147 |
| NM_020151 | STARD7  | 1473 | 1627 | 6.33554232085 |
| NM_020151 | STARD7  | 1066 | 1226 | 6.33554232085 |
| NM_020151 | STARD7  | 2824 | 3003 | 5.4875454143  |
| NM_020151 | STARD7  | 1664 | 1803 | 6.86605703755 |
| NM_020151 | STARD7  | 2019 | 2152 | 5.4875454143  |
| NM_020151 | STARD7  | 782  | 868  | 5.16561731941 |
| NM_020150 | SAR1A   | 32   | 82   | 4.30489410174 |
| NM_020150 | SAR1A   | 1413 | 1483 | 4.38902658007 |
| NM_020150 | SAR1A   | 1278 | 1358 | 5.88985660246 |
| NM_020150 | SAR1A   | 116  | 285  | 7.55895831257 |
| NM_020150 | SAR1A   | 1662 | 1749 | 4.38902658007 |
| NM_020150 | SAR1A   | 1168 | 1245 | 4.3890333109  |
| NM_020150 | SAR1A   | 950  | 1029 | 4.38885956081 |
| NM_020150 | SAR1A   | 2344 | 2415 | 5.38902658007 |
| NM_020150 | SAR1A   | 297  | 628  | 9.71096140601 |
| NM_020150 | SAR1A   | 701  | 918  | 8.08947302926 |
| NM_004586 | RPS6KA3 | 498  | 540  | 5.03431853943 |
| NM_004586 | RPS6KA3 | 324  | 382  | 4.62329864032 |
| NM_004586 | RPS6KA3 | 425  | 464  | 3.03816238928 |
| NM_004586 | RPS6KA3 | 670  | 843  | 5.36026423449 |
| NM_020156 | C1GALT1 | 1348 | 1414 | 5.90817746049 |
| NM_020156 | C1GALT1 | 597  | 661  | 5.32321495977 |
| NM_020156 | C1GALT1 | 685  | 725  | 4.3191973596  |
| NM_020156 | C1GALT1 | 5705 | 5754 | 4.90415986032 |
| NM_020156 | C1GALT1 | 920  | 997  | 5.64514305466 |
| NM_020156 | C1GALT1 | 748  | 802  | 4.32321495977 |
| NM_020156 | C1GALT1 | 1858 | 1927 | 4.32321495977 |
| NM_020156 | C1GALT1 | 5344 | 5402 | 4.90817745294 |
| NM_020156 | C1GALT1 | 997  | 1166 | 7.64514305466 |
| NM_020156 | C1GALT1 | 3348 | 3425 | 5.32321495977 |

|           |          |      |      |               |               |
|-----------|----------|------|------|---------------|---------------|
| NM_020156 | C1GALT1  | 1510 | 1648 | 6.78264657841 |               |
| NM_020156 | C1GALT1  | 3885 | 3940 | 3.3191973596  |               |
| NM_020156 | C1GALT1  | 5764 | 5817 | 3.32321472385 |               |
| NM_020156 | C1GALT1  | 5985 | 6035 | 3.23907575039 |               |
| NM_020156 | C1GALT1  | 3235 | 3281 | 4.90415986032 |               |
| NM_020156 | C1GALT1  | 1975 | 2103 | 5.32321495977 |               |
| NM_020156 | C1GALT1  | 833  | 889  | 4.90817722457 |               |
| NM_020156 | C1GALT1  | 190  | 339  | 7.13056988183 |               |
| NM_020156 | C1GALT1  | 3547 | 3631 | 3.32321495977 |               |
| NM_020156 | C1GALT1  | 1185 | 1342 | 5.90817746049 |               |
| NM_020156 | C1GALT1  | 344  | 521  | 7.13056988183 |               |
| NM_020156 | C1GALT1  | 5145 | 5220 | 4.90817746049 |               |
| NM_020156 | C1GALT1  | 1440 | 1507 | 5.64514305466 |               |
| NM_020156 | C1GALT1  | 2811 | 2897 | 3.3191973596  |               |
| NM_004584 | RAD9A    | 1610 | 1661 | 8.16959040242 |               |
| NM_004584 | RAD9A    | 659  | 709  | 9.08562494335 |               |
| NM_004584 | RAD9A    | 1120 | 1239 | 8.16976415273 |               |
| NM_004584 | RAD9A    | 185  | 267  | 10.4916922476 |               |
| NM_004584 | RAD9A    | 1259 | 1305 | 9.16574655256 |               |
| NM_004584 | RAD9A    | 1663 | 1786 | 11.8702038709 |               |
| NM_004584 | RAD9A    | 1383 | 1466 | 9.16976391681 |               |
| NM_004584 | RAD9A    | 281  | 404  | 10.4916922476 |               |
| NM_004584 | RAD9A    | 1480 | 1522 | 9.16959040242 |               |
| NM_004584 | RAD9A    | 828  | 1058 | 11.8702038709 |               |
| NM_020154 | C15orf24 |      | 827  | 901           | 5.53310864112 |
| NM_020154 | C15orf24 |      | 790  | 823           | 2.72173611889 |
| NM_020154 | C15orf24 |      | 994  | 1032          | 2.64161450968 |
| NM_020154 | C15orf24 |      | 912  | 970           | 4.31071621978 |
| NM_020154 | C15orf24 |      | 552  | 767           | 7.67995002945 |
| NM_020154 | C15orf24 |      | 8    | 551           | 8.55864373322 |
| NM_004589 | SC01     | 1438 | 1484 | 6.63295629116 |               |
| NM_004589 | SC01     | 488  | 538  | 4.96787218123 |               |
| NM_004589 | SC01     | 597  | 672  | 6.05201138306 |               |
| NM_006052 | DSCR3    | 2302 | 2378 | 6.33326288502 |               |
| NM_006052 | DSCR3    | 689  | 751  | 6.32924528485 |               |
| NM_006052 | DSCR3    | 581  | 682  | 8.3332628848  |               |
| NM_006052 | DSCR3    | 358  | 440  | 7.91805163542 |               |
| NM_032882 | PNMA6A   | 1898 | 1941 | 11.3280443213 |               |
| NM_032882 | PNMA6A   | 1785 | 1811 | 11.2440788623 |               |
| NM_032882 | PNMA6A   | 1984 | 2104 | 11.3282180716 |               |
| NM_032882 | PNMA6A   | 2194 | 2262 | 11.3282180714 |               |
| NM_016248 | AKAP11   | 5938 | 5993 | 6.49447409002 |               |
| NM_016248 | AKAP11   | 3241 | 3335 | 7.57861329185 |               |
| NM_016248 | AKAP11   | 1520 | 1571 | 7.49447409002 |               |
| NM_016248 | AKAP11   | 9843 | 9906 | 6.49447409002 |               |
| NM_016248 | AKAP11   | 2563 | 2600 | 8.57459569923 |               |
| NM_016248 | AKAP11   | 7353 | 7418 | 6.57843954908 |               |
| NM_016248 | AKAP11   | 2215 | 2265 | 8.16340204981 |               |
| NM_016248 | AKAP11   | 1198 | 1233 | 8.07943659074 |               |
| NM_016248 | AKAP11   | 1265 | 1339 | 6.57861306348 |               |

|              |              |      |      |               |               |
|--------------|--------------|------|------|---------------|---------------|
| NM_016248    | AKAP11       | 4739 | 4841 | 7.5786132994  |               |
| NM_016248    | AKAP11       | 1070 | 1155 | 8.15955819995 |               |
| NM_016248    | AKAP11       | 102  | 218  | 8.90054139429 |               |
| NM_016243    | CYB5R1       | 171  | 277  | 10.6194519569 |               |
| NM_016243    | CYB5R1       | 89   | 171  | 10.6194519569 |               |
| NM_016243    | CYB5R1       | 1391 | 1446 | 9.03448272516 |               |
| NM_016243    | CYB5R1       | 335  | 415  | 9.44952695548 |               |
| NM_016243    | CYB5R1       | 1552 | 1607 | 8.44952694794 |               |
| NM_016243    | CYB5R1       | 593  | 627  | 9.03448272516 |               |
| NM_016243    | CYB5R1       | 639  | 705  | 9.44952695549 |               |
| NM_016243    | CYB5R1       | 457  | 546  | 8.44952695549 |               |
| NM_016243    | CYB5R1       | 1047 | 1152 | 10.0344894562 |               |
| NM_016243    | CYB5R1       | 278  | 319  | 7.36538774611 |               |
| NM_016243    | CYB5R1       | 706  | 914  | 11.3564175511 |               |
| NM_016243    | CYB5R1       | 932  | 991  | 9.44952695549 |               |
| NM_016243    | CYB5R1       | 1265 | 1389 | 10.6194519569 |               |
| NM_001199691 | TMEM56-RWDD3 |      | 474  | 525           | 10.4669241066 |
| NM_001199691 | TMEM56-RWDD3 |      | 537  | 631           | 10.4669243425 |
| NM_016245    | HSD17B11     |      | 1245 | 1274          | 2.30730993816 |
| NM_016245    | HSD17B11     |      | 115  | 189           | 3.30748345256 |
| NM_016245    | HSD17B11     |      | 1467 | 1670          | 4.11483861054 |
| NM_016245    | HSD17B11     |      | 1321 | 1450          | 4.11483861054 |
| NM_016245    | HSD17B11     |      | 224  | 1244          | 8.70836312476 |
| NM_032233    | SETD3        | 312  | 354  | 6.25844525449 |               |
| NM_032233    | SETD3        | 433  | 587  | 6.26246285467 |               |
| NM_032233    | SETD3        | 2578 | 2696 | 6.99942844883 |               |
| NM_032233    | SETD3        | 963  | 1056 | 4.67750011803 |               |
| NM_032233    | SETD3        | 1320 | 1461 | 5.67750035395 |               |
| NM_152726    | EFHA1        | 1161 | 1236 | 6.83060283817 |               |
| NM_152727    | CPNE2        | 711  | 759  | 8.82713683809 |               |
| NM_152727    | CPNE2        | 429  | 505  | 8.83114770721 |               |
| NM_152727    | CPNE2        | 1247 | 1379 | 9.83115443826 |               |
| NM_006519    | DYNLT1       | 440  | 479  | 5.79176379686 |               |
| NM_006519    | DYNLT1       | 481  | 532  | 5.46966218757 |               |
| NM_006519    | DYNLT1       | 240  | 316  | 5.05479843861 |               |
| NM_006519    | DYNLT1       | 552  | 736  | 7.05479843861 |               |
| NM_006519    | DYNLT1       | 318  | 415  | 5.46983593789 |               |
| NM_006519    | DYNLT1       | 81   | 180  | 5.05479843861 |               |
| NM_007231    | SLC6A14      | 3603 | 3663 | 8.52163836812 |               |
| NM_007231    | SLC6A14      | 2345 | 2396 | 11.1066008688 |               |
| NM_007231    | SLC6A14      | 2195 | 2318 | 11.843566463  |               |
| NM_007231    | SLC6A14      | 4161 | 4236 | 10.5216383681 |               |
| NM_007231    | SLC6A14      | 2836 | 2928 | 10.1066008688 |               |
| NM_007231    | SLC6A14      | 3992 | 4040 | 8.51762076795 |               |
| NM_007231    | SLC6A14      | 75   | 2179 | 17.2931278376 |               |
| NM_007231    | SLC6A14      | 3484 | 3599 | 8.52163836057 |               |
| NM_007231    | SLC6A14      | 3674 | 3807 | 8.52163836812 |               |
| NM_007231    | SLC6A14      | 2528 | 2668 | 11.6915633696 |               |
| NM_001242482 | EIF1AD       | 583  | 638  | 6.88376156817 |               |
| NM_001242482 | EIF1AD       | 668  | 729  | 6.88376156817 |               |

|           |       |      |      |                |
|-----------|-------|------|------|----------------|
| NM_007235 | XPOT  | 2193 | 2248 | 5.14326593872  |
| NM_007235 | XPOT  | 951  | 1034 | 5.54933324299  |
| NM_007235 | XPOT  | 2939 | 3019 | 5.81236764883  |
| NM_007235 | XPOT  | 1866 | 1911 | 4.81236091777  |
| NM_007235 | XPOT  | 3183 | 3214 | 4.22723139779  |
| NM_007235 | XPOT  | 1571 | 1636 | 4.81236764882  |
| NM_007235 | XPOT  | 3363 | 3436 | 4.81236764883  |
| NM_007235 | XPOT  | 3038 | 3111 | 4.22723139779  |
| NM_007235 | XPOT  | 1077 | 1157 | 4.2274051481   |
| NM_007235 | XPOT  | 2669 | 2727 | 4.22740514056  |
| NM_007235 | XPOT  | 3803 | 3870 | 4.81236764883  |
| NM_007235 | XPOT  | 433  | 482  | 3.22740514056  |
| NM_007235 | XPOT  | 3871 | 3906 | 3.22338754793  |
| NM_007235 | XPOT  | 1353 | 1468 | 5.54933324299  |
| NM_007235 | XPOT  | 600  | 672  | 4.22740491219  |
| NM_007235 | XPOT  | 3591 | 3662 | 4.80835004866  |
| NM_007235 | XPOT  | 1643 | 1751 | 5.22740514811  |
| NM_007235 | XPOT  | 2261 | 2447 | 6.22740514811  |
| NM_007235 | XPOT  | 1159 | 1315 | 5.81236764883  |
| NM_007235 | XPOT  | 3489 | 3548 | 3.22723139779  |
| NM_007235 | XPOT  | 2458 | 2651 | 6.22740514811  |
| NM_007235 | XPOT  | 503  | 582  | 4.81236091777  |
| NM_007235 | XPOT  | 1987 | 2059 | 4.22740514056  |
| NM_007234 | DCTN3 | 215  | 287  | 8.76643592636  |
| NM_000917 | P4HA1 | 1851 | 1897 | 1.98786040344  |
| NM_000917 | P4HA1 | 611  | 670  | 0.983842803494 |
| NM_000917 | P4HA1 | 892  | 993  | 2.30978849855  |
| NM_000917 | P4HA1 | 2384 | 2441 | 2.57282290438  |
| NM_000917 | P4HA1 | 1262 | 1325 | 0.987860403667 |
| NM_000917 | P4HA1 | 1484 | 1542 | 1.57282290439  |
| NM_000917 | P4HA1 | 238  | 301  | 0.987860403667 |
| NM_000917 | P4HA1 | 709  | 776  | 1.98768665335  |
| NM_000917 | P4HA1 | 1062 | 1101 | 0.987686653349 |
| NM_000917 | P4HA1 | 1926 | 2012 | 2.30978849855  |
| NM_000917 | P4HA1 | 1776 | 1851 | 2.57282290439  |
| NM_000917 | P4HA1 | 1595 | 1714 | 2.57282290439  |
| NM_000917 | P4HA1 | 1384 | 1476 | 3.15778540511  |
| NM_000917 | P4HA1 | 306  | 461  | 2.57282290439  |
| NM_000917 | P4HA1 | 776  | 885  | 2.98786040367  |
| NM_000917 | P4HA1 | 496  | 596  | 2.57282290439  |
| NM_007236 | CHP   | 1064 | 1128 | 4.42130187476  |
| NM_007236 | CHP   | 1495 | 1590 | 7.22865679683  |
| NM_007236 | CHP   | 1402 | 1444 | 4.42130163885  |
| NM_007236 | CHP   | 482  | 555  | 7.00626437549  |
| NM_007236 | CHP   | 3108 | 3169 | 4.33716266539  |
| NM_007236 | CHP   | 2678 | 2720 | 5.4172842746   |
| NM_007236 | CHP   | 2770 | 2871 | 7.59122687621  |
| NM_007236 | CHP   | 827  | 896  | 4.4172842746   |
| NM_007236 | CHP   | 727  | 794  | 6.00626413957  |
| NM_007236 | CHP   | 1136 | 1323 | 8.00626437549  |



|              |               |      |      |                   |
|--------------|---------------|------|------|-------------------|
| NM_007236    | CHP           | 899  | 1054 | 5.42130187477     |
| NM_007236    | CHP           | 134  | 192  | 5.42130187477     |
| NM_007236    | CHP           | 561  | 718  | 7.22865679683     |
| NM_007236    | CHP           | 1919 | 2002 | 4.42112812445     |
| NM_007236    | CHP           | 262  | 480  | 7.42130187477     |
| NM_000918    | P4HB          | 2341 | 2551 | 3.95004939161     |
| NM_000918    | P4HB          | 1800 | 2312 | 5.74975074112     |
| NM_000918    | P4HB          | 133  | 1767 | 7.05314288457     |
| NM_001444    | FABP5         | 581  | 629  | 5.48934510704     |
| NM_004125    | DNAJC25-GNG10 |      | 478  | 526 10.726658897  |
| NM_004125    | DNAJC25-GNG10 |      | 689  | 744 9.13785254642 |
| NM_194282    | LIN54         | 3562 | 3604 | 5.74783669656     |
| NM_194285    | SPTY2D1       | 4460 | 4513 | 7.4518589154      |
| NM_003932    | ST13          | 1446 | 1515 | 2.62256595024     |
| NM_003932    | ST13          | 937  | 1013 | 2.62256595024     |
| NM_003932    | ST13          | 468  | 533  | 1.03759671847     |
| NM_003932    | ST13          | 2001 | 2042 | 2.03358584935     |
| NM_003932    | ST13          | 1538 | 1608 | 2.62255921919     |
| NM_003932    | ST13          | 2226 | 2296 | 2.03760344197     |
| NM_003932    | ST13          | 783  | 832  | 1.0376032136      |
| NM_003932    | ST13          | 1154 | 1229 | 2.03760344952     |
| NM_003932    | ST13          | 629  | 756  | 1.03760344952     |
| NM_006513    | SARS          | 575  | 645  | 3.20991519036     |
| NM_006513    | SARS          | 1589 | 1658 | 1.62494595858     |
| NM_006513    | SARS          | 794  | 892  | 3.20991519036     |
| NM_006513    | SARS          | 1476 | 1529 | 3.20991518281     |
| NM_006513    | SARS          | 85   | 132  | 2.62495268963     |
| NM_006513    | SARS          | 1399 | 1465 | 1.62495268963     |
| NM_006513    | SARS          | 174  | 285  | 4.20991519036     |
| NM_006513    | SARS          | 1659 | 1705 | 3.20991519035     |
| NM_006513    | SARS          | 1283 | 1367 | 4.20991519036     |
| NM_006513    | SARS          | 926  | 1021 | 3.62495268963     |
| NM_006513    | SARS          | 342  | 566  | 5.20991519036     |
| NM_006513    | SARS          | 1023 | 1100 | 3.62495268963     |
| NM_003930    | SKAP2         | 813  | 893  | 8.10999208725     |
| NM_003930    | SKAP2         | 1521 | 1576 | 6.02585287787     |
| NM_003930    | SKAP2         | 324  | 411  | 7.69495458797     |
| NM_003930    | SKAP2         | 1170 | 1267 | 8.91734700931     |
| NM_003930    | SKAP2         | 915  | 992  | 8.91734700931     |
| NM_003930    | SKAP2         | 686  | 736  | 7.10999208724     |
| NM_003930    | SKAP2         | 1788 | 1852 | 8.10999208725     |
| NM_003930    | SKAP2         | 3782 | 3901 | 8.69495458797     |
| NM_003930    | SKAP2         | 2559 | 2647 | 8.91734700931     |
| NM_003930    | SKAP2         | 1282 | 1339 | 6.02585287787     |
| NM_003930    | SKAP2         | 1346 | 1441 | 8.10999208725     |
| NM_003930    | SKAP2         | 542  | 616  | 8.10999208725     |
| NM_003930    | SKAP2         | 1446 | 1508 | 7.1099853562      |
| NM_003930    | SKAP2         | 3086 | 3182 | 7.10999208725     |
| NM_001160103 | ZC3H14        | 970  | 1019 | 5.50803308844     |
| NM_001160103 | ZC3H14        | 422  | 502  | 7.09299582508     |

|              |         |      |      |               |
|--------------|---------|------|------|---------------|
| NM_001160103 | ZC3H14  | 730  | 790  | 6.50802659331 |
| NM_001160103 | ZC3H14  | 2388 | 2453 | 7.08897822491 |
| NM_001160103 | ZC3H14  | 1963 | 2005 | 6.42389411498 |
| NM_001160103 | ZC3H14  | 1041 | 1099 | 5.42389411498 |
| NM_001160103 | ZC3H14  | 3375 | 3464 | 7.50803332436 |
| NM_001160103 | ZC3H14  | 1262 | 1321 | 6.50401572419 |
| NM_001160103 | ZC3H14  | 2166 | 2311 | 8.31538824642 |
| NM_001160103 | ZC3H14  | 2466 | 2537 | 7.09299582508 |
| NM_001167734 | VARS2   | 1485 | 1534 | 8.18060892864 |
| NM_001167734 | VARS2   | 1987 | 2041 | 6.59563993278 |
| NM_001167734 | VARS2   | 732  | 795  | 6.59547291352 |
| NM_001167734 | VARS2   | 2351 | 2441 | 6.59564665629 |
| NM_001167734 | VARS2   | 2564 | 2627 | 8.18060916455 |
| NM_001167734 | VARS2   | 1074 | 1166 | 8.59564666384 |
| NM_001167734 | VARS2   | 816  | 988  | 8.18060916456 |
| NM_003934    | FUBP3   | 2281 | 2339 | 4.21213164887 |
| NM_003934    | FUBP3   | 2026 | 2067 | 5.21230516327 |
| NM_003934    | FUBP3   | 2121 | 2169 | 4.20828779902 |
| NM_003934    | FUBP3   | 2355 | 2391 | 4.12816618981 |
| NM_003934    | FUBP3   | 1888 | 1947 | 5.21230539164 |
| NM_003934    | FUBP3   | 1757 | 1821 | 4.20828779902 |
| NM_003934    | FUBP3   | 2188 | 2254 | 5.21230539897 |
| NM_003934    | FUBP3   | 307  | 430  | 6.21230539919 |
| NM_003032    | ST6GAL1 | 3549 | 3592 | 3.26976517668 |
| NM_003032    | ST6GAL1 | 1206 | 1257 | 4.27378277685 |
| NM_003032    | ST6GAL1 | 2967 | 3012 | 4.26976517668 |
| NM_003032    | ST6GAL1 | 2876 | 2927 | 3.27360902653 |
| NM_003032    | ST6GAL1 | 1879 | 1933 | 4.26976517668 |
| NM_003032    | ST6GAL1 | 4169 | 4230 | 5.27378277685 |
| NM_003032    | ST6GAL1 | 2333 | 2371 | 4.8547276774  |
| NM_003032    | ST6GAL1 | 1272 | 1403 | 7.5217102903  |
| NM_003032    | ST6GAL1 | 2383 | 2527 | 5.59571087174 |
| NM_003032    | ST6GAL1 | 742  | 952  | 7.73321439549 |
| NM_003032    | ST6GAL1 | 3373 | 3544 | 6.73321439549 |
| NM_003032    | ST6GAL1 | 533  | 719  | 7.27378277685 |
| NM_003032    | ST6GAL1 | 2064 | 2197 | 6.08113769891 |
| NM_003032    | ST6GAL1 | 1762 | 1871 | 6.4437077783  |
| NM_003032    | ST6GAL1 | 427  | 532  | 4.85874527757 |
| NM_003032    | ST6GAL1 | 3659 | 4157 | 9.10667279102 |
| NM_003032    | ST6GAL1 | 963  | 1198 | 7.91763896663 |
| NM_003032    | ST6GAL1 | 127  | 418  | 8.3612456181  |
| NM_003032    | ST6GAL1 | 2213 | 2319 | 4.27378277685 |
| NM_003032    | ST6GAL1 | 2683 | 2858 | 6.73321439549 |
| NM_003032    | ST6GAL1 | 3066 | 3373 | 8.08113769891 |
| NM_003032    | ST6GAL1 | 1648 | 1746 | 4.85874527757 |
| NM_003032    | ST6GAL1 | 1403 | 1647 | 6.97422249499 |
| NM_004120    | GBP2    | 590  | 632  | 6.13864377824 |
| NM_004120    | GBP2    | 366  | 463  | 6.72762364322 |
| NM_004120    | GBP2    | 728  | 833  | 6.72762387914 |
| NM_004120    | GBP2    | 838  | 894  | 6.14265464736 |

|              |        |      |      |                  |
|--------------|--------|------|------|------------------|
| NM_004120    | GBP2   | 105  | 138  | 5.05852216903    |
| NM_004120    | GBP2   | 1466 | 1556 | 7.14266137841    |
| NM_004120    | GBP2   | 896  | 934  | 6.05852216903    |
| NM_004120    | GBP2   | 1814 | 1894 | 5.14266137087    |
| NM_004120    | GBP2   | 1683 | 1764 | 5.13864377824    |
| NM_004120    | GBP2   | 633  | 696  | 6.14266137841    |
| NM_006729    | DIAPH2 | 654  | 738  | 8.73034075293    |
| NM_006729    | DIAPH2 | 2693 | 2769 | 6.72632315276    |
| NM_001010853 | PM20D2 | 874  | 945  | 4.81553453811    |
| NM_001010853 | PM20D2 | 675  | 740  | 4.81169068825    |
| NM_001010853 | PM20D2 | 2073 | 2146 | 3.81570828843    |
| NM_001010853 | PM20D2 | 4099 | 4183 | 3.81570155737    |
| NM_001010853 | PM20D2 | 1270 | 1353 | 5.4006707816     |
| NM_001010853 | PM20D2 | 1128 | 1185 | 4.81169068825    |
| NM_001010858 | RNF187 | 1665 | 1799 | 5.91368203812    |
| NM_001010858 | RNF187 | 1824 | 1893 | 4.59174721218    |
| NM_001010858 | RNF187 | 693  | 743  | 4.59174721218    |
| NM_001010858 | RNF187 | 1396 | 1432 | 3.58773634306    |
| NM_001010858 | RNF187 | 1571 | 1665 | 6.76167894467    |
| NM_001010858 | RNF187 | 505  | 579  | 5.17671644395    |
| NM_001010858 | RNF187 | 1000 | 1121 | 4.59175394323    |
| NM_001443    | FABP1  | 113  | 249  | -0.0613486839617 |
| NM_001443    | FABP1  | 294  | 447  | 1.35368881532    |
| NM_003036    | SKI    | 3101 | 3188 | 9.73524819526    |
| NM_003036    | SKI    | 3750 | 3821 | 8.73524819526    |
| NM_003036    | SKI    | 1062 | 1110 | 8.73524146421    |
| NM_003036    | SKI    | 2813 | 2878 | 7.73507444494    |
| NM_003036    | SKI    | 1564 | 1621 | 7.73524146421    |
| NM_003036    | SKI    | 1900 | 1998 | 7.73524819525    |
| NM_003036    | SKI    | 2762 | 2797 | 9.73524146421    |
| NM_003036    | SKI    | 4723 | 4766 | 7.73524819526    |
| NM_003036    | SKI    | 559  | 641  | 7.73524819526    |
| NM_003036    | SKI    | 4770 | 4834 | 9.32021069598    |
| NM_003036    | SKI    | 338  | 423  | 9.73524819526    |
| NM_003036    | SKI    | 796  | 930  | 9.73524819526    |
| NM_003036    | SKI    | 4834 | 4902 | 8.73524818771    |
| NM_003036    | SKI    | 1378 | 1468 | 9.32021069598    |
| NM_003036    | SKI    | 4131 | 4229 | 11.320210696     |
| NM_003036    | SKI    | 1766 | 1826 | 7.65110898588    |
| NM_003036    | SKI    | 2385 | 2444 | 7.73524819525    |
| NM_003036    | SKI    | 1479 | 1535 | 8.73524819504    |
| NM_003036    | SKI    | 3892 | 4068 | 11.7352481953    |
| NM_003036    | SKI    | 5499 | 5572 | 9.73524819526    |
| NM_003036    | SKI    | 1833 | 1896 | 7.73507444494    |
| NM_003036    | SKI    | 3364 | 3628 | 11.9051731967    |
| NM_003036    | SKI    | 448  | 514  | 8.73524819526    |
| NM_003036    | SKI    | 2511 | 2667 | 9.73524819526    |
| NM_003036    | SKI    | 2023 | 2128 | 7.73524819526    |
| NM_003036    | SKI    | 1230 | 1323 | 10.320210696     |
| NM_003036    | SKI    | 112  | 179  | 8.73123059509    |

|              |          |      |      |               |               |
|--------------|----------|------|------|---------------|---------------|
| NM_003036    | SKI      | 3188 | 3342 | 11.0571762901 |               |
| NM_003036    | SKI      | 4910 | 5067 | 10.7352481953 |               |
| NM_003036    | SKI      | 940  | 1060 | 8.73524819526 |               |
| NM_007055    | POLR3A   | 3466 | 3533 | 8.12412312409 |               |
| NM_007055    | POLR3A   | 617  | 677  | 8.12412312409 |               |
| NM_007055    | POLR3A   | 921  | 984  | 7.20808858316 |               |
| NM_007055    | POLR3A   | 788  | 859  | 7.79322482665 |               |
| NM_007055    | POLR3A   | 4072 | 4166 | 8.20826233347 |               |
| NM_007055    | POLR3A   | 5209 | 5262 | 8.20826209756 |               |
| NM_007055    | POLR3A   | 4201 | 4241 | 7.12412312409 |               |
| NM_007055    | POLR3A   | 3537 | 3579 | 6.2042447333  |               |
| NM_007055    | POLR3A   | 3355 | 3418 | 7.20808858316 |               |
| NM_007055    | POLR3A   | 1549 | 1662 | 8.7932248342  |               |
| NM_007055    | POLR3A   | 1715 | 1820 | 7.20825560242 |               |
| NM_007054    | KIF3A    | 4899 | 4989 | 7.40816812495 |               |
| NM_024700    | SNIP1    | 1414 | 1476 | 7.67348506559 |               |
| NM_007051    | FAF1     | 481  | 570  | 5.68040027669 |               |
| NM_007051    | FAF1     | 1156 | 1233 | 5.68040027669 |               |
| NM_007051    | FAF1     | 1311 | 1388 | 5.67638268407 |               |
| NM_007051    | FAF1     | 147  | 215  | 6.26536254904 |               |
| NM_007051    | FAF1     | 663  | 834  | 7.00232837913 |               |
| NM_024707    | GEMIN7   | 807  | 863  | 7.11160089125 |               |
| NM_024707    | GEMIN7   | 229  | 277  | 7.107583527   |               |
| NM_024707    | GEMIN7   | 628  | 682  | 6.107583527   |               |
| NM_031902    | MRPS5    | 1261 | 1317 | 2.49201256835 |               |
| NM_031902    | MRPS5    | 1205 | 1232 | 4.07295746912 |               |
| NM_031902    | MRPS5    | 1049 | 1105 | 2.49200583752 |               |
| NM_031902    | MRPS5    | 354  | 456  | 3.49201256857 |               |
| NM_031902    | MRPS5    | 465  | 601  | 5.07697506929 |               |
| NM_031902    | MRPS5    | 1386 | 1483 | 4.07697506929 |               |
| NM_031902    | MRPS5    | 845  | 925  | 4.07697506929 |               |
| NM_007277    | EXOC3    | 2070 | 2131 | 6.2083609407  |               |
| NM_007277    | EXOC3    | 760  | 845  | 5.20434334075 |               |
| NM_007277    | EXOC3    | 1834 | 1872 | 6.12422173154 |               |
| NM_007277    | EXOC3    | 1776 | 1817 | 5.12422173154 |               |
| NM_024709    | C1orf115 |      | 2552 | 2636          | 9.07653436826 |
| NM_024709    | C1orf115 |      | 600  | 652           | 6.75460626583 |
| NM_024709    | C1orf115 |      | 1966 | 1995          | 6.75443252306 |
| NM_024709    | C1orf115 |      | 1029 | 1085          | 8.33939502378 |
| NM_024709    | C1orf115 |      | 1850 | 1885          | 7.7505886732  |
| NM_024709    | C1orf115 |      | 1261 | 1312          | 7.75459954232 |
| NM_024709    | C1orf115 |      | 729  | 831           | 7.75460603746 |
| NM_007059    | KPTN     | 544  | 614  | 10.9322175183 |               |
| NM_007059    | KPTN     | 654  | 701  | 8.84825205921 |               |
| NM_007059    | KPTN     | 1275 | 1356 | 8.92837366842 |               |
| NM_007059    | KPTN     | 723  | 773  | 8.92837366842 |               |
| NM_007059    | KPTN     | 424  | 531  | 10.9323912686 |               |
| NM_001017529 | PRR5     | 452  | 508  | 10.5616655112 |               |
| NM_001167595 | AMACR    | 338  | 388  | 5.45741495325 |               |
| NM_004128    | GTF2F2   | 210  | 367  | 7.63447368767 |               |

|              |         |      |      |               |
|--------------|---------|------|------|---------------|
| NM_007024    | TMEM115 | 887  | 944  | 7.61604985559 |
| NM_007024    | TMEM115 | 578  | 687  | 10.2050299565 |
| NM_007024    | TMEM115 | 500  | 571  | 8.62006744821 |
| NM_007024    | TMEM115 | 1024 | 1111 | 9.62006744821 |
| NM_007024    | TMEM115 | 1937 | 2006 | 8.53592824638 |
| NM_007024    | TMEM115 | 719  | 790  | 8.62006744821 |
| NM_001025101 | MBP     | 341  | 409  | 7.40907292705 |
| NM_001025107 | ADAR    | 4032 | 4094 | 7.75481882961 |
| NM_001025107 | ADAR    | 2724 | 2801 | 7.43289073472 |
| NM_001025107 | ADAR    | 1389 | 1467 | 5.4328907345  |
| NM_001025107 | ADAR    | 4484 | 4545 | 6.93371402606 |
| NM_001025107 | ADAR    | 5898 | 5985 | 7.01785323544 |
| NM_001025107 | ADAR    | 1977 | 2059 | 7.75481882961 |
| NM_001025107 | ADAR    | 5505 | 5556 | 7.01784650439 |
| NM_001025107 | ADAR    | 588  | 631  | 6.42887313455 |
| NM_001025107 | ADAR    | 6131 | 6181 | 6.43289072717 |
| NM_001025107 | ADAR    | 5246 | 5307 | 7.75481882938 |
| NM_001025107 | ADAR    | 713  | 772  | 5.43289073472 |
| NM_001025107 | ADAR    | 2322 | 2388 | 8.01785323544 |
| NM_001025107 | ADAR    | 5557 | 5615 | 8.01785323543 |
| NM_001025107 | ADAR    | 4263 | 4311 | 5.43289073472 |
| NM_001025107 | ADAR    | 2632 | 2723 | 5.43289073471 |
| NM_001025107 | ADAR    | 5318 | 5345 | 7.34875152534 |
| NM_001025107 | ADAR    | 3902 | 3984 | 7.43289073472 |
| NM_001025107 | ADAR    | 4980 | 5164 | 9.01785323544 |
| NM_001025107 | ADAR    | 4776 | 4835 | 5.34875152534 |
| NM_001025107 | ADAR    | 2152 | 2189 | 6.34875152534 |
| NM_001025107 | ADAR    | 5194 | 5242 | 7.01785322789 |
| NM_001025107 | ADAR    | 4725 | 4765 | 5.34875152534 |
| NM_001025107 | ADAR    | 3709 | 3786 | 5.43288400367 |
| NM_001025107 | ADAR    | 1582 | 1712 | 5.43289073472 |
| NM_001025107 | ADAR    | 3441 | 3561 | 8.01785323544 |
| NM_001025107 | ADAR    | 4138 | 4262 | 8.75481882961 |
| NM_001025107 | ADAR    | 494  | 582  | 6.4328907345  |
| NM_001025107 | ADAR    | 352  | 437  | 6.43289072717 |
| NM_001025107 | ADAR    | 1832 | 1929 | 6.43289073472 |
| NM_001025107 | ADAR    | 2191 | 2299 | 7.43289073472 |
| NM_001025107 | ADAR    | 291  | 348  | 7.01383563527 |
| NM_001025107 | ADAR    | 2891 | 3059 | 8.43289073472 |
| NM_001025107 | ADAR    | 790  | 1074 | 9.68081824816 |
| NM_001025107 | ADAR    | 6197 | 6447 | 9.95645269078 |
| NM_001025107 | ADAR    | 1164 | 1333 | 7.01785323544 |
| NM_001025107 | ADAR    | 5632 | 5703 | 7.01785322789 |
| NM_001025107 | ADAR    | 3565 | 3683 | 7.43289073472 |
| NM_001025107 | ADAR    | 5988 | 6114 | 7.01785323544 |
| NM_001025107 | ADAR    | 3126 | 3432 | 8.89232235336 |
| NM_001025105 | CSNK1A1 | 164  | 210  | 3.2332707364  |
| NM_001025105 | CSNK1A1 | 997  | 1041 | 3.14930527734 |
| NM_001025105 | CSNK1A1 | 1801 | 1876 | 3.81840675153 |
| NM_001025105 | CSNK1A1 | 2241 | 2323 | 3.81823323713 |

|              |          |      |      |               |               |
|--------------|----------|------|------|---------------|---------------|
| NM_001025105 | CSNK1A1  | 836  | 969  | 5.40336948817 |               |
| NM_001025105 | CSNK1A1  | 600  | 758  | 5.69287610536 |               |
| NM_001025105 | CSNK1A1  | 362  | 506  | 3.81840698744 |               |
| NM_001145940 | PAFAH1B3 |      | 469  | 532           | 7.0711513535  |
| NM_001145940 | PAFAH1B3 |      | 548  | 607           | 6.48618212928 |
| NM_001145940 | PAFAH1B3 |      | 428  | 468           | 6.48618885278 |
| NM_001145940 | PAFAH1B3 |      | 669  | 773           | 8.48618886033 |
| NM_001145940 | PAFAH1B3 |      | 271  | 376           | 8.65611386178 |
| NM_007028    | TRIM31   | 1249 | 1301 | 12.419144702  |               |
| NM_007028    | TRIM31   | 160  | 255  | 13.0041074386 |               |
| NM_000314    | PTEN     | 3477 | 3540 | 4.48681863633 |               |
| NM_000314    | PTEN     | 1231 | 1286 | 5.40669702712 |               |
| NM_000314    | PTEN     | 586  | 671  | 4.49083600059 |               |
| NM_153813    | ZFPM1    | 732  | 795  | 11.938468938  |               |
| NM_004309    | ARHGDI1  | 1802 | 1881 | 2.59120750409 |               |
| NM_004309    | ARHGDI1  | 152  | 227  | 4.17617000459 |               |
| NM_004309    | ARHGDI1  | 229  | 287  | 3.59120750409 |               |
| NM_004309    | ARHGDI1  | 943  | 993  | 4.59120750409 |               |
| NM_004309    | ARHGDI1  | 877  | 920  | 2.59120749654 |               |
| NM_004309    | ARHGDI1  | 671  | 827  | 4.91313559898 |               |
| NM_004309    | ARHGDI1  | 530  | 577  | 2.58718990392 |               |
| NM_004309    | ARHGDI1  | 1643 | 1681 | 2.50706829471 |               |
| NM_004309    | ARHGDI1  | 1096 | 1176 | 4.59120750409 |               |
| NM_004309    | ARHGDI1  | 581  | 632  | 2.59103375378 |               |
| NM_004309    | ARHGDI1  | 1211 | 1306 | 4.59120750409 |               |
| NM_004309    | ARHGDI1  | 327  | 487  | 5.39856242615 |               |
| NM_006184    | NUCB1    | 2479 | 2539 | 4.12370254236 |               |
| NM_006184    | NUCB1    | 867  | 923  | 4.70866504308 |               |
| NM_006184    | NUCB1    | 362  | 429  | 4.70866504308 |               |
| NM_006184    | NUCB1    | 434  | 503  | 5.44563063725 |               |
| NM_006184    | NUCB1    | 1750 | 1798 | 5.12370254236 |               |
| NM_006184    | NUCB1    | 999  | 1077 | 4.70866504308 |               |
| NM_006184    | NUCB1    | 2405 | 2465 | 3.12370254214 |               |
| NM_006184    | NUCB1    | 2105 | 2174 | 4.12370254236 |               |
| NM_006184    | NUCB1    | 510  | 704  | 6.8241422605  |               |
| NM_006184    | NUCB1    | 1100 | 1288 | 5.12370254236 |               |
| NM_006184    | NUCB1    | 1817 | 2065 | 7.44563063725 |               |
| NM_006184    | NUCB1    | 2266 | 2371 | 6.44563063725 |               |
| NM_006184    | NUCB1    | 710  | 814  | 4.70866504308 |               |
| NM_006184    | NUCB1    | 1607 | 1701 | 4.70866504308 |               |
| NM_006185    | NUMA1    | 6048 | 6109 | 5.85878840115 |               |
| NM_006185    | NUMA1    | 3479 | 3527 | 4.94275386022 |               |
| NM_006185    | NUMA1    | 1161 | 1268 | 6.52387251109 |               |
| NM_006185    | NUMA1    | 1728 | 1769 | 4.94275386022 |               |
| NM_006185    | NUMA1    | 6732 | 6772 | 4.85878840115 |               |
| NM_006185    | NUMA1    | 3566 | 3623 | 4.85878840115 |               |
| NM_006185    | NUMA1    | 376  | 501  | 5.94292087948 |               |
| NM_006185    | NUMA1    | 659  | 802  | 6.52789011126 |               |
| NM_006187    | OAS3     | 272  | 354  | 9.75004383697 |               |
| NM_001152    | SLC25A5  | 1060 | 1239 | 6.97721971272 |               |

|           |          |      |      |                    |
|-----------|----------|------|------|--------------------|
| NM_001152 | SLC25A5  | 79   | 228  | 5.44670499602      |
| NM_001152 | SLC25A5  | 251  | 1054 | 8.89148983869      |
| NM_207352 | CYP4V2   | 2754 | 2821 | 7.40164097813      |
| NM_207352 | CYP4V2   | 1362 | 1428 | 7.40163424708      |
| NM_207352 | CYP4V2   | 1703 | 1762 | 8.39762337796      |
| NM_207356 | C1orf174 |      | 800  | 837 7.52686015187  |
| NM_207356 | C1orf174 |      | 1464 | 1515 7.52686015187 |
| NM_207356 | C1orf174 |      | 1103 | 1179 7.52686688293 |
| NM_138962 | MSI2     | 1297 | 1368 | 4.76180021477      |
| NM_138962 | MSI2     | 606  | 713  | 2.76162646446      |
| NM_004307 | APBB2    | 2923 | 2942 | 7.22813362277      |
| NM_014668 | GREB1    | 7191 | 7268 | 5.13580005144      |
| NM_014669 | NUP93    | 1864 | 1920 | 5.24551707487      |
| NM_014669 | NUP93    | 1809 | 1859 | 4.24551683918      |
| NM_014669 | NUP93    | 1072 | 1130 | 4.24551034404      |
| NM_014669 | NUP93    | 346  | 391  | 5.8304795756       |
| NM_014669 | NUP93    | 2015 | 2082 | 4.16137786571      |
| NM_014669 | NUP93    | 881  | 916  | 4.24149947492      |
| NM_014669 | NUP93    | 1328 | 1469 | 6.83047957582      |
| NM_014669 | NUP93    | 491  | 591  | 4.24551707509      |
| NM_014669 | NUP93    | 2139 | 2228 | 6.2455170751       |
| NM_014669 | NUP93    | 687  | 853  | 5.83047957582      |
| NM_005570 | LMAN1    | 4619 | 4675 | 4.23844470631      |
| NM_005570 | LMAN1    | 4398 | 4492 | 4.50147911215      |
| NM_005570 | LMAN1    | 1750 | 1819 | 2.91651661143      |
| NM_005570 | LMAN1    | 1247 | 1316 | 4.50147911215      |
| NM_005570 | LMAN1    | 4540 | 4611 | 3.91651661143      |
| NM_005570 | LMAN1    | 975  | 1118 | 6.23844470631      |
| NM_005570 | LMAN1    | 794  | 967  | 6.08644161287      |
| NM_005570 | LMAN1    | 1145 | 1246 | 5.61695632957      |
| NM_005570 | LMAN1    | 2223 | 2289 | 2.91651660388      |
| NM_005570 | LMAN1    | 1999 | 2133 | 3.91651661143      |
| NM_005570 | LMAN1    | 24   | 129  | 3.91651661143      |
| NM_005570 | LMAN1    | 4768 | 4816 | 1.91650988037      |
| NM_005570 | LMAN1    | 4084 | 4192 | 3.50147911215      |
| NM_005570 | LMAN1    | 2938 | 2990 | 2.91651637551      |
| NM_005570 | LMAN1    | 198  | 793  | 8.29155604277      |
| NM_005570 | LMAN1    | 3335 | 3400 | 3.50147911192      |
| NM_005570 | LMAN1    | 1320 | 1634 | 7.12596997705      |
| NM_005570 | LMAN1    | 2587 | 2707 | 4.23844470631      |
| NM_005570 | LMAN1    | 2351 | 2582 | 5.50147911215      |
| NM_005570 | LMAN1    | 3968 | 4062 | 2.91651661143      |
| NM_005570 | LMAN1    | 3533 | 3720 | 5.37594823006      |
| NM_005570 | LMAN1    | 2998 | 3085 | 4.72387153348      |
| NM_005570 | LMAN1    | 2745 | 2873 | 4.23844470631      |
| NM_004300 | ACP1     | 598  | 705  | 0.915935107707     |
| NM_004300 | ACP1     | 108  | 195  | 2.72329002976      |
| NM_004300 | ACP1     | 473  | 578  | 3.08586010915      |
| NM_004300 | ACP1     | 705  | 765  | -0.168204101677    |
| NM_004300 | ACP1     | 1135 | 1175 | 1.49688000826      |

|           |       |      |      |                  |
|-----------|-------|------|------|------------------|
| NM_004300 | ACP1  | 1175 | 1266 | -0.0840648998419 |
| NM_004300 | ACP1  | 358  | 411  | 1.91592837665    |
| NM_005572 | LMNA  | 1277 | 1390 | 6.67607868655    |
| NM_005572 | LMNA  | 1430 | 1477 | 4.50597993479    |
| NM_005572 | LMNA  | 1712 | 1770 | 5.82808178       |
| NM_005572 | LMNA  | 775  | 1102 | 8.41304428072    |
| NM_005572 | LMNA  | 64   | 103  | 3.42201447573    |
| NM_005572 | LMNA  | 512  | 695  | 6.96558530375    |
| NM_005572 | LMNA  | 312  | 471  | 7.09111618583    |
| NM_005572 | LMNA  | 120  | 264  | 6.09111618583    |
| NM_005572 | LMNA  | 1774 | 1942 | 6.67607868655    |
| NM_005572 | LMNA  | 1491 | 1663 | 6.82808178       |
| NM_005572 | LMNA  | 1132 | 1267 | 6.09111618583    |
| NM_005573 | LMNB1 | 3168 | 3213 | 5.0570028653     |
| NM_005573 | LMNB1 | 1353 | 1413 | 5.64195887089    |
| NM_005573 | LMNB1 | 3030 | 3073 | 4.0568293509     |
| NM_005573 | LMNB1 | 2237 | 2314 | 5.64196560194    |
| NM_005573 | LMNB1 | 2757 | 2807 | 6.05699637017    |
| NM_005573 | LMNB1 | 2062 | 2098 | 5.05298550105    |
| NM_005573 | LMNB1 | 1775 | 1800 | 3.97286389184    |
| NM_005573 | LMNB1 | 2339 | 2410 | 5.64196560194    |
| NM_005573 | LMNB1 | 1553 | 1594 | 5.05700310121    |
| NM_005573 | LMNB1 | 2830 | 2941 | 6.37893119611    |
| NM_005573 | LMNB1 | 610  | 816  | 7.51643471986    |
| NM_005573 | LMNB1 | 1283 | 1343 | 5.64195887089    |
| NM_005573 | LMNB1 | 1188 | 1274 | 5.64196560194    |
| NM_005573 | LMNB1 | 1443 | 1553 | 6.86435802328    |
| NM_005573 | LMNB1 | 2418 | 2468 | 5.64196560194    |
| NM_005573 | LMNB1 | 1623 | 1739 | 4.05700310122    |
| NM_005573 | LMNB1 | 1811 | 2044 | 7.05700310122    |
| NM_005573 | LMNB1 | 2135 | 2237 | 5.64196559439    |
| NM_005575 | LNPEP | 2767 | 2826 | 10.4399833431    |
| NM_005575 | LNPEP | 747  | 797  | 9.43998334289    |
| NM_005575 | LNPEP | 2846 | 2910 | 10.4399833431    |
| NM_005575 | LNPEP | 2026 | 2073 | 9.43997661206    |
| NM_005575 | LNPEP | 3201 | 3253 | 9.43997661206    |
| NM_005575 | LNPEP | 2085 | 2136 | 10.4398095928    |
| NM_005575 | LNPEP | 3694 | 3777 | 11.2473382652    |
| NM_005575 | LNPEP | 1756 | 1799 | 10.0249458438    |
| NM_005575 | LNPEP | 4301 | 4351 | 8.43980959279    |
| NM_005575 | LNPEP | 847  | 887  | 10.3558441337    |
| NM_005575 | LNPEP | 1502 | 1652 | 11.4399833431    |
| NM_005575 | LNPEP | 1200 | 1327 | 9.43998334311    |
| NM_005575 | LNPEP | 670  | 746  | 8.43980959279    |
| NM_005575 | LNPEP | 3531 | 3608 | 9.43997661206    |
| NM_005575 | LNPEP | 1800 | 1891 | 10.761911438     |
| NM_005575 | LNPEP | 2668 | 2734 | 9.43997661206    |
| NM_005575 | LNPEP | 4009 | 4121 | 9.43998334311    |
| NM_005575 | LNPEP | 2918 | 3198 | 12.6099083446    |
| NM_005575 | LNPEP | 948  | 1030 | 9.43998334289    |



|           |        |      |      |               |
|-----------|--------|------|------|---------------|
| NM_005575 | LNPEP  | 2262 | 2423 | 10.761911438  |
| NM_005575 | LNPEP  | 1342 | 1442 | 9.43998334311 |
| NM_005575 | LNPEP  | 3300 | 3387 | 10.761911438  |
| NM_005575 | LNPEP  | 2511 | 2611 | 11.0249458438 |
| NM_005575 | LNPEP  | 1919 | 2004 | 10.0249458438 |
| NM_005575 | LNPEP  | 1033 | 1140 | 10.761911438  |
| NM_005575 | LNPEP  | 571  | 662  | 8.43998333556 |
| NM_005575 | LNPEP  | 1656 | 1723 | 10.0249458438 |
| NM_014660 | PHF14  | 2667 | 2740 | 4.09520079267 |
| NM_014660 | PHF14  | 2073 | 2139 | 5.67998954308 |
| NM_014660 | PHF14  | 2184 | 2255 | 4.09519406162 |
| NM_014660 | PHF14  | 42   | 104  | 6.09520079267 |
| NM_014660 | PHF14  | 1585 | 1660 | 6.68016329339 |
| NM_014660 | PHF14  | 1283 | 1361 | 4.09502704235 |
| NM_014660 | PHF14  | 1665 | 1786 | 6.41712888756 |
| NM_014660 | PHF14  | 1394 | 1464 | 6.68016329339 |
| NM_014661 | FAM53B | 1398 | 1466 | 10.1357489136 |
| NM_014661 | FAM53B | 5375 | 5429 | 11.1359159329 |
| NM_014661 | FAM53B | 2430 | 2545 | 10.135922664  |
| NM_014661 | FAM53B | 616  | 679  | 9.55096016302 |
| NM_004302 | ACVR1B | 915  | 966  | 9.08264476183 |
| NM_004302 | ACVR1B | 1365 | 1407 | 8.07862739758 |
| NM_004302 | ACVR1B | 544  | 634  | 8.08264499775 |
| NM_004302 | ACVR1B | 350  | 398  | 9.08264499774 |
| NM_004302 | ACVR1B | 836  | 881  | 9.07862739758 |
| NM_004302 | ACVR1B | 208  | 275  | 8.99850578837 |
| NM_004302 | ACVR1B | 1032 | 1171 | 8.08264476183 |
| NM_025232 | REEP4  | 1177 | 1240 | 9.6074638909  |
| NM_025232 | REEP4  | 1465 | 1539 | 10.1924263916 |
| NM_025232 | REEP4  | 456  | 634  | 12.414818813  |
| NM_025232 | REEP4  | 644  | 699  | 10.1924263916 |
| NM_025232 | REEP4  | 881  | 938  | 9.60746365498 |
| NM_025232 | REEP4  | 353  | 436  | 9.6074638909  |
| NM_025232 | REEP4  | 266  | 313  | 8.60344629073 |
| NM_003756 | EIF3H  | 322  | 380  | 1.04672852519 |
| NM_003756 | EIF3H  | 978  | 1065 | 2.63169102591 |
| NM_003756 | EIF3H  | 1106 | 1144 | 2.04271765607 |
| NM_003756 | EIF3H  | 273  | 315  | 1.96259604686 |
| NM_003756 | EIF3H  | 151  | 262  | 4.04673525625 |
| NM_003756 | EIF3H  | 606  | 806  | 4.63169775697 |
| NM_003756 | EIF3H  | 384  | 591  | 4.95362585185 |
| NM_003754 | EIF3F  | 1059 | 1115 | 4.11411060723 |
| NM_003754 | EIF3F  | 894  | 1013 | 5.11411060745 |
| NM_003754 | EIF3F  | 377  | 590  | 6.36203812089 |
| NM_003754 | EIF3F  | 628  | 856  | 4.92146552951 |
| NM_003754 | EIF3F  | 1122 | 1204 | 2.11411037153 |
| NM_003755 | EIF3G  | 391  | 448  | 3.46746315582 |
| NM_003755 | EIF3G  | 241  | 291  | 3.38332418236 |
| NM_003755 | EIF3G  | 293  | 334  | 4.05242588491 |
| NM_003755 | EIF3G  | 460  | 590  | 4.05242589246 |

|           |       |      |      |               |
|-----------|-------|------|------|---------------|
| NM_003755 | EIF3G | 29   | 92   | 5.05242589246 |
| NM_003755 | EIF3G | 787  | 909  | 4.46746339174 |
| NM_003752 | EIF3C | 1978 | 2025 | 2.17679282558 |
| NM_003752 | EIF3C | 596  | 636  | 2.17661908281 |
| NM_003752 | EIF3C | 79   | 170  | 2.17679283291 |
| NM_003752 | EIF3C | 841  | 902  | 3.17679282558 |
| NM_003752 | EIF3C | 2034 | 2108 | 2.17679282558 |
| NM_003752 | EIF3C | 175  | 266  | 4.17679283313 |
| NM_003752 | EIF3C | 446  | 580  | 5.49872092802 |
| NM_003752 | EIF3C | 2854 | 2964 | 4.76175533385 |
| NM_003752 | EIF3C | 1725 | 1961 | 5.87723255127 |
| NM_003752 | EIF3C | 2663 | 2703 | 2.09265362375 |
| NM_003752 | EIF3C | 1316 | 1605 | 7.03477382826 |
| NM_003752 | EIF3C | 918  | 1038 | 3.76175533385 |
| NM_003752 | EIF3C | 273  | 444  | 4.49872092802 |
| NM_003752 | EIF3C | 2115 | 2208 | 4.17679283313 |
| NM_003752 | EIF3C | 638  | 767  | 4.98414775519 |
| NM_003752 | EIF3C | 1040 | 1308 | 6.49872092802 |
| NM_003752 | EIF3C | 2316 | 2657 | 6.49872092802 |
| NM_003753 | EIF3D | 1844 | 1915 | 5.43308657539 |
| NM_003753 | EIF3D | 643  | 722  | 4.11115847295 |
| NM_003753 | EIF3D | 867  | 942  | 4.02701927111 |
| NM_003753 | EIF3D | 729  | 819  | 4.11115174944 |
| NM_003753 | EIF3D | 962  | 1077 | 5.91851340256 |
| NM_003753 | EIF3D | 267  | 326  | 4.11098473018 |
| NM_003753 | EIF3D | 1456 | 1573 | 5.69612098122 |
| NM_003753 | EIF3D | 1184 | 1437 | 7.1111584805  |
| NM_003753 | EIF3D | 414  | 539  | 5.43308657539 |
| NM_003750 | EIF3A | 1106 | 1240 | 6.21271343139 |
| NM_003750 | EIF3A | 609  | 690  | 4.62775093067 |
| NM_003750 | EIF3A | 703  | 758  | 4.62775093067 |
| NM_003750 | EIF3A | 3177 | 3265 | 2.30582283578 |
| NM_003750 | EIF3A | 5147 | 5178 | 3.89078510059 |
| NM_003750 | EIF3A | 3392 | 3474 | 3.30582259986 |
| NM_003750 | EIF3A | 297  | 348  | 4.30564908547 |
| NM_003750 | EIF3A | 4637 | 4684 | 2.30180523561 |
| NM_003750 | EIF3A | 1751 | 1827 | 3.89061158619 |
| NM_003750 | EIF3A | 3974 | 4108 | 3.8907853365  |
| NM_003750 | EIF3A | 2421 | 2458 | 2.2216836264  |
| NM_003750 | EIF3A | 3922 | 3964 | 2.30582282823 |
| NM_003750 | EIF3A | 72   | 132  | 3.89077860545 |
| NM_003750 | EIF3A | 2016 | 2069 | 3.30564908547 |
| NM_003750 | EIF3A | 201  | 292  | 5.11317775784 |
| NM_003750 | EIF3A | 3477 | 3663 | 4.8907853365  |
| NM_003750 | EIF3A | 1875 | 1982 | 3.30582283578 |
| NM_003750 | EIF3A | 363  | 606  | 5.76525445442 |
| NM_003750 | EIF3A | 3011 | 3090 | 4.30582283578 |
| NM_003750 | EIF3A | 1441 | 1685 | 7.35021695514 |
| NM_003750 | EIF3A | 4892 | 4952 | 3.30180523561 |
| NM_003750 | EIF3A | 969  | 1067 | 5.76525445442 |

|              |               |      |      |               |               |
|--------------|---------------|------|------|---------------|---------------|
| NM_003750    | EIF3A         | 826  | 941  | 5.47574783723 |               |
| NM_003750    | EIF3A         | 4225 | 4379 | 5.30582283578 |               |
| NM_003750    | EIF3A         | 1306 | 1441 | 5.11317775784 |               |
| NM_003750    | EIF3A         | 2105 | 2420 | 5.76525445442 |               |
| NM_003758    | EIF3J         | 1613 | 1681 | 3.36371032858 |               |
| NM_003758    | EIF3J         | 929  | 991  | 6.03281203113 |               |
| NM_003758    | EIF3J         | 128  | 198  | 3.44784953796 |               |
| NM_003758    | EIF3J         | 556  | 627  | 5.02879443851 |               |
| NM_003758    | EIF3J         | 654  | 765  | 5.76977763263 |               |
| NM_003758    | EIF3J         | 233  | 327  | 4.44784953796 |               |
| NM_001930    | DHPS          | 1294 | 1330 | 4.29276494094 |               |
| NM_001930    | DHPS          | 610  | 726  | 6.29678254111 |               |
| NM_001930    | DHPS          | 859  | 908  | 4.29276494094 |               |
| NM_001930    | DHPS          | 288  | 345  | 4.29677581006 |               |
| NM_001203261 | NDUFC2-KCTD14 |      | 655  | 781           | 9.44440472273 |
| NM_001203261 | NDUFC2-KCTD14 |      | 550  | 627           | 7.94190438221 |
| NM_001203261 | NDUFC2-KCTD14 |      | 403  | 453           | 7.35694188148 |
| NM_001203261 | NDUFC2-KCTD14 |      | 454  | 541           | 6.35694188148 |
| NM_014480    | ZNF544        | 741  | 798  | 9.58206905417 |               |
| NM_014481    | APEX2         | 1094 | 1152 | 9.67448112982 |               |
| NM_014481    | APEX2         | 1619 | 1696 | 8.08934487878 |               |
| NM_014481    | APEX2         | 980  | 1058 | 9.08951862887 |               |
| NM_014481    | APEX2         | 737  | 823  | 9.67448112982 |               |
| NM_014481    | APEX2         | 164  | 252  | 10.0895186289 |               |
| NM_052864    | TIFA          | 851  | 915  | 7.48634889512 |               |
| NM_052865    | C20orf72      |      | 779  | 840           | 6.41881432913 |
| NM_052865    | C20orf72      |      | 183  | 280           | 6.41881409321 |
| NM_052865    | C20orf72      |      | 94   | 161           | 5.74971261902 |
| NM_052865    | C20orf72      |      | 689  | 770           | 6.83385182086 |
| NM_005754    | G3BP1         | 51   | 116  | 6.92245661998 |               |
| NM_005754    | G3BP1         | 1769 | 1864 | 5.92245661998 |               |
| NM_005754    | G3BP1         | 1298 | 1346 | 7.5074191207  |               |
| NM_005754    | G3BP1         | 1354 | 1444 | 5.33749411925 |               |
| NM_005754    | G3BP1         | 120  | 161  | 4.3374873882  |               |
| NM_005754    | G3BP1         | 711  | 965  | 8.5074191207  |               |
| NM_005754    | G3BP1         | 2649 | 2695 | 4.33347651908 |               |
| NM_005754    | G3BP1         | 1007 | 1289 | 8.42495696051 |               |
| NM_005754    | G3BP1         | 1981 | 2065 | 5.92245661997 |               |
| NM_005754    | G3BP1         | 388  | 709  | 8.72981154203 |               |
| NM_005754    | G3BP1         | 164  | 366  | 8.0379338374  |               |
| NM_005754    | G3BP1         | 1701 | 1766 | 6.65942221414 |               |
| NM_001204062 | COMMD3-BMI1   |      | 1958 | 2008          | 7.27397875648 |
| NM_001204062 | COMMD3-BMI1   |      | 1570 | 1619          | 6.77314873409 |
| NM_001204062 | COMMD3-BMI1   |      | 1795 | 1842          | 6.77315545759 |
| NM_001204062 | COMMD3-BMI1   |      | 866  | 917           | 5.77314873409 |
| NM_001204062 | COMMD3-BMI1   |      | 2067 | 2102          | 5.68901625576 |
| NM_001204062 | COMMD3-BMI1   |      | 546  | 617           | 5.77314873409 |
| NM_001204062 | COMMD3-BMI1   |      | 476  | 543           | 6.77315545759 |
| NM_152637    | METTTL7B      | 1292 | 1327 | 9.29813653586 |               |
| NM_152637    | METTTL7B      | 368  | 504  | 11.2983102862 |               |

|              |          |      |      |               |
|--------------|----------|------|------|---------------|
| NM_152637    | METTTL7B | 903  | 1061 | 11.8832727869 |
| NM_152637    | METTTL7B | 1068 | 1249 | 12.1056652082 |
| NM_152637    | METTTL7B | 505  | 747  | 12.9987500043 |
| NM_152637    | METTTL7B | 199  | 365  | 11.8832727869 |
| NM_152326    | ANKRD9   | 1085 | 1138 | 7.6392087772  |
| NM_152326    | ANKRD9   | 444  | 496  | 7.6392087772  |
| NM_152326    | ANKRD9   | 256  | 292  | 7.63536492734 |
| NM_152326    | ANKRD9   | 1548 | 1614 | 7.63938252752 |
| NM_152326    | ANKRD9   | 1476 | 1547 | 8.63937579646 |
| NM_032326    | TMEM175  | 687  | 800  | 13.3428235233 |
| NM_032326    | TMEM175  | 472  | 559  | 13.6647516182 |
| NM_032326    | TMEM175  | 1435 | 1521 | 13.6647516182 |
| NM_032326    | TMEM175  | 300  | 394  | 13.3428235233 |
| NM_032637    | SKP2     | 272  | 323  | 6.60583743648 |
| NM_032637    | SKP2     | 189  | 229  | 6.60583070542 |
| NM_032637    | SKP2     | 759  | 802  | 6.52169822709 |
| NM_032637    | SKP2     | 1182 | 1280 | 7.92776553136 |
| NM_032637    | SKP2     | 632  | 757  | 9.1907999372  |
| NM_032637    | SKP2     | 878  | 1137 | 9.99815485925 |
| NM_032637    | SKP2     | 422  | 630  | 9.77576243792 |
| NM_032324    | NTPCR    | 273  | 360  | 6.78474003381 |
| NM_032631    | HDGFRP2  | 1263 | 1297 | 4.90258920938 |
| NM_032631    | HDGFRP2  | 304  | 335  | 5.90241545907 |
| NM_032631    | HDGFRP2  | 1614 | 1658 | 4.81845       |
| NM_032631    | HDGFRP2  | 883  | 975  | 5.90258897347 |
| NM_032632    | PAPOLA   | 2433 | 2496 | 3.48210359496 |
| NM_032632    | PAPOLA   | 923  | 1039 | 5.48227734528 |
| NM_032632    | PAPOLA   | 2526 | 2579 | 5.067239846   |
| NM_032632    | PAPOLA   | 641  | 707  | 4.48227733773 |
| NM_032632    | PAPOLA   | 2858 | 2918 | 3.48227733773 |
| NM_032632    | PAPOLA   | 303  | 422  | 4.48227734528 |
| NM_032632    | PAPOLA   | 861  | 900  | 4.48227061423 |
| NM_032632    | PAPOLA   | 4151 | 4191 | 4.3981381359  |
| NM_032632    | PAPOLA   | 4260 | 4425 | 6.28963226734 |
| NM_032632    | PAPOLA   | 3704 | 3781 | 4.47825974511 |
| NM_032632    | PAPOLA   | 3920 | 4006 | 5.48227734528 |
| NM_032632    | PAPOLA   | 3258 | 3342 | 3.48227733773 |
| NM_032632    | PAPOLA   | 2215 | 2263 | 4.98310063662 |
| NM_032632    | PAPOLA   | 3437 | 3535 | 3.48227710936 |
| NM_032632    | PAPOLA   | 729  | 819  | 5.48227734528 |
| NM_032329    | ING5     | 2845 | 2883 | 4.15749155222 |
| NM_032329    | ING5     | 3576 | 3616 | 5.15364770236 |
| NM_001077238 | SPPL2B   | 1123 | 1187 | 8.71499871753 |
| NM_001077238 | SPPL2B   | 512  | 562  | 8.13002948575 |
| NM_001077238 | SPPL2B   | 1264 | 1340 | 9.13003620926 |
| NM_001077238 | SPPL2B   | 1411 | 1486 | 8.1300362168  |
| NM_001077238 | SPPL2B   | 675  | 782  | 9.45196431169 |
| NM_001077238 | SPPL2B   | 172  | 231  | 7.12986246649 |
| NM_001077238 | SPPL2B   | 250  | 305  | 8.13003621658 |
| NM_001077238 | SPPL2B   | 820  | 863  | 7.12601861663 |

|              |         |      |      |               |
|--------------|---------|------|------|---------------|
| NM_001077238 | SPPL2B  | 2291 | 2321 | 7.12601861663 |
| NM_001077238 | SPPL2B  | 449  | 507  | 8.71499871753 |
| NM_001144827 | RPUSD4  | 706  | 746  | 6.79090321842 |
| NM_001144827 | RPUSD4  | 1178 | 1241 | 5.87102482763 |
| NM_001144827 | RPUSD4  | 465  | 560  | 7.46000469261 |
| NM_001144823 | DENND4A | 371  | 426  | 5.43351958576 |
| NM_001144823 | DENND4A | 3267 | 3347 | 5.51765855922 |
| NM_001144823 | DENND4A | 2935 | 3048 | 7.51765855922 |
| NM_001144823 | DENND4A | 1977 | 2055 | 6.51765879514 |
| NM_001144823 | DENND4A | 3871 | 3925 | 5.43351958576 |
| NM_001144823 | DENND4A | 4537 | 4586 | 5.43351958576 |
| NM_001144823 | DENND4A | 2443 | 2542 | 7.10262105994 |
| NM_001144823 | DENND4A | 5118 | 5170 | 6.51748504482 |
| NM_001144823 | DENND4A | 2316 | 2434 | 7.10262129586 |
| NM_001144823 | DENND4A | 2777 | 2870 | 6.51364119497 |
| NM_033505    | EPT1    | 5241 | 5301 | 7.15105545447 |
| NM_033505    | EPT1    | 7267 | 7320 | 6.15105544693 |
| NM_033505    | EPT1    | 2537 | 2588 | 7.15105545447 |
| NM_033505    | EPT1    | 2632 | 2716 | 8.15105545447 |
| NM_033505    | EPT1    | 2898 | 3005 | 7.7360179552  |
| NM_033505    | EPT1    | 2729 | 2805 | 6.15105545447 |
| NM_033505    | EPT1    | 5168 | 5228 | 6.06691624509 |
| NM_033505    | EPT1    | 2226 | 2272 | 8.47298354181 |
| NM_033505    | EPT1    | 3536 | 3611 | 8.15105545447 |
| NM_033505    | EPT1    | 3979 | 4045 | 7.15104872342 |
| NM_033505    | EPT1    | 3153 | 3211 | 7.15105545425 |
| NM_033505    | EPT1    | 5796 | 5876 | 7.73601795497 |
| NM_033505    | EPT1    | 7932 | 7988 | 8.15104872342 |
| NM_033505    | EPT1    | 1377 | 1546 | 9.7360179552  |
| NM_033505    | EPT1    | 1277 | 1371 | 8.15105545447 |
| NM_033505    | EPT1    | 7348 | 7386 | 7.1470378543  |
| NM_033505    | EPT1    | 201  | 387  | 9.85149517262 |
| NM_033505    | EPT1    | 690  | 903  | 10.2385182957 |
| NM_033505    | EPT1    | 2420 | 2527 | 8.47298354936 |
| NM_033505    | EPT1    | 4600 | 4650 | 8.15104872342 |
| NM_033505    | EPT1    | 391  | 605  | 10.0579460501 |
| NM_033505    | EPT1    | 1655 | 1697 | 6.1470378543  |
| NM_033505    | EPT1    | 7101 | 7177 | 6.15088170416 |
| NM_033505    | EPT1    | 135  | 200  | 6.15105544693 |
| NM_033505    | EPT1    | 1148 | 1248 | 9.32098045592 |
| NM_033505    | EPT1    | 7456 | 7540 | 6.15088170416 |
| NM_033505    | EPT1    | 2333 | 2410 | 7.73200035502 |
| NM_033505    | EPT1    | 3328 | 3497 | 8.7360179552  |
| NM_033505    | EPT1    | 935  | 1148 | 10.7949116442 |
| NM_001144829 | FM05    | 1081 | 1119 | 3.91517609875 |
| NM_022145    | CENPK   | 1444 | 1485 | 5.79480700494 |
| NM_022145    | CENPK   | 1634 | 1701 | 5.79481373577 |
| NM_022149    | MAGEF1  | 529  | 590  | 7.45491826937 |
| NM_022149    | MAGEF1  | 1390 | 1488 | 5.87397336882 |
| NM_022149    | MAGEF1  | 1216 | 1380 | 8.45893586954 |

|              |         |      |      |               |
|--------------|---------|------|------|---------------|
| NM_015531    | C2CD3   | 535  | 575  | 10.9861709048 |
| NM_015531    | C2CD3   | 581  | 659  | 11.6512550148 |
| NM_015531    | C2CD3   | 1274 | 1356 | 10.9861709048 |
| NM_001048218 | SCYL1   | 290  | 331  | 5.36594645883 |
| NM_001048218 | SCYL1   | 1303 | 1394 | 6.95090246441 |
| NM_001048218 | SCYL1   | 1558 | 1672 | 8.1733016168  |
| NM_015532    | GRINL1A | 3591 | 3610 | 5.66856138718 |
| NM_015532    | GRINL1A | 1390 | 1471 | 4.66856138718 |
| NM_015534    | ZZZ3    | 2988 | 3050 | 4.46777092435 |
| NM_015534    | ZZZ3    | 3307 | 3381 | 6.05273342507 |
| NM_015534    | ZZZ3    | 1084 | 1145 | 4.47161477421 |
| NM_015534    | ZZZ3    | 1321 | 1405 | 5.46777092435 |
| NM_015534    | ZZZ3    | 1944 | 2002 | 4.38764931514 |
| NM_015289    | VPS39   | 1795 | 1873 | 7.10225037282 |
| NM_015289    | VPS39   | 4672 | 4728 | 6.09823300857 |
| NM_015289    | VPS39   | 1903 | 2027 | 7.10225060874 |
| NM_015288    | PHF15   | 2686 | 2754 | 9.45450942764 |
| NM_015288    | PHF15   | 3925 | 3984 | 7.45049182747 |
| NM_015288    | PHF15   | 333  | 395  | 7.45049182747 |
| NM_015288    | PHF15   | 673  | 711  | 7.45450919172 |
| NM_015288    | PHF15   | 5476 | 5541 | 7.45450269659 |
| NM_015288    | PHF15   | 4832 | 4987 | 10.0394719284 |
| NM_015283    | DPY19L1 | 944  | 988  | 7.56864531928 |
| NM_015283    | DPY19L1 | 1528 | 1613 | 9.68814013687 |
| NM_015283    | DPY19L1 | 1988 | 2065 | 8.57266291945 |
| NM_015283    | DPY19L1 | 3589 | 3655 | 7.57266291945 |
| NM_015283    | DPY19L1 | 2098 | 2136 | 6.98752666842 |
| NM_015283    | DPY19L1 | 3111 | 3178 | 8.30962851362 |
| NM_015283    | DPY19L1 | 3875 | 3950 | 7.57266268354 |
| NM_015283    | DPY19L1 | 2138 | 2217 | 8.57266291945 |
| NM_015283    | DPY19L1 | 1002 | 1076 | 9.15762542018 |
| NM_015283    | DPY19L1 | 1712 | 1803 | 7.98770041873 |
| NM_015283    | DPY19L1 | 731  | 942  | 10.6315566085 |
| NM_015283    | DPY19L1 | 3504 | 3578 | 6.98770041873 |
| NM_015283    | DPY19L1 | 473  | 680  | 10.8456814139 |
| NM_015283    | DPY19L1 | 222  | 441  | 10.3096285136 |
| NM_015283    | DPY19L1 | 2805 | 2918 | 9.30962851362 |
| NM_015283    | DPY19L1 | 1077 | 1498 | 11.6315566085 |
| NM_015283    | DPY19L1 | 2555 | 2758 | 10.1576254202 |
| NM_015283    | DPY19L1 | 2460 | 2549 | 8.57266291945 |
| NM_015283    | DPY19L1 | 1806 | 1978 | 8.57266291945 |
| NM_015282    | CLASP1  | 107  | 185  | 6.33492007473 |
| NM_015282    | CLASP1  | 3173 | 3232 | 7.33492031065 |
| NM_015282    | CLASP1  | 3522 | 3566 | 7.33492007473 |
| NM_015282    | CLASP1  | 3303 | 3383 | 7.33492031043 |
| NM_015282    | CLASP1  | 3425 | 3485 | 5.33474656033 |
| NM_015282    | CLASP1  | 433  | 501  | 5.3349135796  |
| NM_015282    | CLASP1  | 4459 | 4511 | 5.3349203031  |
| NM_015282    | CLASP1  | 1560 | 1619 | 6.33090271048 |
| NM_015282    | CLASP1  | 1725 | 1776 | 5.25078110127 |

|              |        |      |      |               |
|--------------|--------|------|------|---------------|
| NM_015282    | CLASP1 | 1997 | 2051 | 5.33090271048 |
| NM_015282    | CLASP1 | 3954 | 4014 | 5.25078110127 |
| NM_015282    | CLASP1 | 3236 | 3292 | 5.33090271048 |
| NM_015282    | CLASP1 | 3629 | 3710 | 6.33492031065 |
| NM_015282    | CLASP1 | 6090 | 6129 | 5.33090271048 |
| NM_015282    | CLASP1 | 7719 | 7789 | 6.33492031065 |
| NM_015282    | CLASP1 | 4065 | 4116 | 5.33492031043 |
| NM_015282    | CLASP1 | 5822 | 5897 | 5.33090271048 |
| NM_015282    | CLASP1 | 2742 | 2810 | 6.9158652112  |
| NM_015282    | CLASP1 | 2991 | 3120 | 7.33492031064 |
| NM_015282    | CLASP1 | 2885 | 2989 | 7.33492031065 |
| NM_015282    | CLASP1 | 2813 | 2883 | 6.3349135796  |
| NM_015282    | CLASP1 | 1286 | 1414 | 6.33492031065 |
| NM_001040025 | ARL16  | 807  | 901  | 8.64006508079 |
| NM_001040025 | ARL16  | 936  | 1015 | 6.6400650808  |
| NM_001040025 | ARL16  | 406  | 536  | 9.44742000286 |
| NM_002408    | MGAT2  | 1380 | 1444 | 8.32192071599 |
| NM_002408    | MGAT2  | 259  | 314  | 6.73695797957 |
| NM_002408    | MGAT2  | 2027 | 2074 | 7.73695820794 |
| NM_002408    | MGAT2  | 1596 | 1690 | 9.32192071621 |
| NM_002408    | MGAT2  | 1508 | 1589 | 8.73695821549 |
| NM_002408    | MGAT2  | 1313 | 1373 | 9.05888607446 |
| NM_002408    | MGAT2  | 867  | 1116 | 10.4373979336 |
| NM_001040020 | FAM3C  | 1861 | 1908 | 6.43195287988 |
| NM_001040020 | FAM3C  | 2219 | 2265 | 4.84699037916 |
| NM_001040020 | FAM3C  | 1441 | 1481 | 4.84699037916 |
| NM_001040020 | FAM3C  | 1356 | 1406 | 7.17292934316 |
| NM_001040020 | FAM3C  | 878  | 980  | 6.85100797933 |
| NM_001040020 | FAM3C  | 722  | 783  | 6.85100797911 |
| NM_001040020 | FAM3C  | 1496 | 1572 | 6.43579672973 |
| NM_001040020 | FAM3C  | 571  | 695  | 7.65836290139 |
| NM_001040020 | FAM3C  | 281  | 354  | 5.85100797932 |
| NM_001040020 | FAM3C  | 372  | 530  | 7.65836290139 |
| NM_001040022 | SIRPA  | 1228 | 1300 | 9.33880592315 |
| NM_001040022 | SIRPA  | 729  | 791  | 9.34264977301 |
| NM_002401    | MAP3K3 | 4198 | 4254 | 5.73310852863 |
| NM_002401    | MAP3K3 | 1547 | 1607 | 5.81323013784 |
| NM_001144759 | PHLDB1 | 100  | 157  | 7.66781145673 |
| NM_001144759 | PHLDB1 | 1294 | 1351 | 7.66380058761 |
| NM_013976    | GCDH   | 725  | 800  | 8.96984543692 |
| NM_013974    | DDAH2  | 402  | 474  | 8.86647359884 |
| NM_013974    | DDAH2  | 230  | 270  | 8.45143609201 |
| NM_013974    | DDAH2  | 341  | 370  | 6.78233438945 |
| NM_013974    | DDAH2  | 870  | 973  | 7.86647359884 |
| NM_013974    | DDAH2  | 598  | 766  | 10.1884016937 |
| NM_001040125 | PQLC2  | 1020 | 1066 | 10.6513489061 |
| NM_001040125 | PQLC2  | 1067 | 1116 | 10.066386177  |
| NM_001040125 | PQLC2  | 1362 | 1438 | 11.6513489136 |
| NM_001040125 | PQLC2  | 903  | 1001 | 9.06638641289 |
| NM_001040125 | PQLC2  | 1251 | 1347 | 10.6513489136 |

|              |          |      |      |               |               |
|--------------|----------|------|------|---------------|---------------|
| NM_001040125 | PQLC2    | 779  | 871  | 9.06638617697 |               |
| NM_001177651 | SLC9A6   | 214  | 306  | 9.63679634964 |               |
| NM_001177651 | SLC9A6   | 2508 | 2568 | 10.6327854805 |               |
| NM_001177651 | SLC9A6   | 1642 | 1699 | 11.2215918311 |               |
| NM_138357    | MCU      | 200  | 251  | 7.76858997292 |               |
| NM_138357    | MCU      | 321  | 391  | 7.76858324942 |               |
| NM_138353    | DCAF15   | 1787 | 1834 | 8.45253620523 |               |
| NM_138353    | DCAF15   | 1399 | 1453 | 8.45655356948 |               |
| NM_138353    | DCAF15   | 1557 | 1651 | 9.45655380539 |               |
| NM_138353    | DCAF15   | 179  | 359  | 10.7784819003 |               |
| NM_138353    | DCAF15   | 383  | 430  | 9.45253620523 |               |
| NM_138352    | SAMD1    | 1357 | 1442 | 9.21965479987 |               |
| NM_138352    | SAMD1    | 976  | 1083 | 8.80461730059 |               |
| NM_138352    | SAMD1    | 1484 | 1546 | 7.13551559049 |               |
| NM_138352    | SAMD1    | 89   | 153  | 7.21965479987 |               |
| NM_001009880 | KIAA0930 |      | 2526 | 2597          | 5.52278759443 |
| NM_001009880 | KIAA0930 |      | 1791 | 1850          | 4.43864838505 |
| NM_001009880 | KIAA0930 |      | 1133 | 1181          | 4.43864838505 |
| NM_001009880 | KIAA0930 |      | 600  | 650           | 4.52278086338 |
| NM_001009880 | KIAA0930 |      | 749  | 798           | 4.52278758688 |
| NM_001009880 | KIAA0930 |      | 1042 | 1103          | 4.51876999426 |
| NM_001009880 | KIAA0930 |      | 115  | 210           | 7.10775009516 |
| NM_001009880 | KIAA0930 |      | 2151 | 2225          | 5.52261384412 |
| NM_001009880 | KIAA0930 |      | 338  | 460           | 6.10775009516 |
| NM_001009881 | ZCCHC11  | 4871 | 4995 | 6.06168202783 |               |
| NM_001009881 | ZCCHC11  | 5602 | 5688 | 5.06168202028 |               |
| NM_001242903 | AKAP1    | 2710 | 2823 | 6.04305011467 |               |
| NM_001242903 | AKAP1    | 3669 | 3742 | 6.04305011467 |               |
| NM_001242903 | AKAP1    | 4093 | 4191 | 6.45808761395 |               |
| NM_001242903 | AKAP1    | 1134 | 1187 | 4.45808761373 |               |
| NM_001242903 | AKAP1    | 2397 | 2438 | 6.04304338362 |               |
| NM_001242903 | AKAP1    | 688  | 745  | 4.4580876064  |               |
| NM_001242903 | AKAP1    | 788  | 832  | 4.45407001378 |               |
| NM_001242903 | AKAP1    | 1778 | 1819 | 4.45407001378 |               |
| NM_001242903 | AKAP1    | 851  | 969  | 6.78001570884 |               |
| NM_001242903 | AKAP1    | 3617 | 3656 | 5.45407001378 |               |
| NM_001242903 | AKAP1    | 1896 | 1960 | 4.45808761395 |               |
| NM_001242903 | AKAP1    | 2905 | 3019 | 6.78001570884 |               |
| NM_001242903 | AKAP1    | 2438 | 2477 | 4.37394840457 |               |
| NM_001242903 | AKAP1    | 2052 | 2133 | 6.04305011467 |               |
| NM_001242903 | AKAP1    | 2173 | 2361 | 7.04305011467 |               |
| NM_001242903 | AKAP1    | 2479 | 2608 | 7.04305011467 |               |
| NM_001242903 | AKAP1    | 3898 | 4042 | 6.45808761395 |               |
| NM_001242903 | AKAP1    | 1449 | 1621 | 6.45808761395 |               |
| NM_001242903 | AKAP1    | 590  | 658  | 5.45407001378 |               |
| NM_001242903 | AKAP1    | 3020 | 3193 | 6.78001570884 |               |
| NM_001242903 | AKAP1    | 3272 | 3493 | 8.15852733209 |               |
| NM_001242903 | AKAP1    | 1328 | 1415 | 4.45808761395 |               |
| NM_001277    | CHKA     | 968  | 1038 | 6.37905979554 |               |
| NM_001277    | CHKA     | 1220 | 1290 | 7.1864147176  |               |



|              |        |      |      |               |
|--------------|--------|------|------|---------------|
| NM_001277    | CHKA   | 2472 | 2671 | 7.70098789043 |
| NM_001277    | CHKA   | 2121 | 2179 | 5.96402229604 |
| NM_001277    | CHKA   | 1886 | 2038 | 7.83849141418 |
| NM_001277    | CHKA   | 2198 | 2345 | 6.37905979554 |
| NM_001277    | CHKA   | 2369 | 2467 | 7.37905979554 |
| NM_001277    | CHKA   | 533  | 765  | 7.83849141418 |
| NM_001277    | CHKA   | 1048 | 1202 | 8.37905979554 |
| NM_001277    | CHKA   | 1307 | 1413 | 6.70098789043 |
| NM_001277    | CHKA   | 1643 | 1855 | 8.1864147176  |
| NM_001277    | CHKA   | 147  | 221  | 5.37905306449 |
| NM_001277    | CHKA   | 1419 | 1612 | 8.62698730898 |
| NM_001277    | CHKA   | 786  | 914  | 6.70098789043 |
| NM_001018050 | POLR3H | 3502 | 3559 | 6.71482318365 |
| NM_001018050 | POLR3H | 2706 | 2745 | 6.63470157444 |
| NM_001018050 | POLR3H | 1190 | 1326 | 7.71884078381 |
| NM_001274    | CHEK1  | 1666 | 1708 | 5.89890386021 |
| NM_001274    | CHEK1  | 723  | 807  | 8.48788396089 |
| NM_001274    | CHEK1  | 1546 | 1603 | 6.90292146016 |
| NM_001274    | CHEK1  | 641  | 720  | 7.48788372519 |
| NM_001274    | CHEK1  | 253  | 295  | 7.40374475172 |
| NM_001273    | CHD4   | 4451 | 4514 | 5.63237453399 |
| NM_001273    | CHD4   | 380  | 434  | 3.54823532461 |
| NM_001273    | CHD4   | 5897 | 5969 | 4.63237453399 |
| NM_001273    | CHD4   | 6118 | 6174 | 3.63237453399 |
| NM_001273    | CHD4   | 1418 | 1468 | 3.63237453399 |
| NM_001273    | CHD4   | 968  | 1045 | 5.63237453377 |
| NM_001273    | CHD4   | 5179 | 5226 | 3.63237429807 |
| NM_001273    | CHD4   | 4044 | 4140 | 5.63237453399 |
| NM_001273    | CHD4   | 4651 | 4748 | 6.63237453399 |
| NM_001273    | CHD4   | 6175 | 6328 | 7.33281425213 |
| NM_001273    | CHD4   | 1233 | 1415 | 7.09180615263 |
| NM_001273    | CHD4   | 1715 | 1757 | 4.63237452644 |
| NM_001273    | CHD4   | 1088 | 1223 | 7.09180615263 |
| NM_001273    | CHD4   | 675  | 761  | 4.62835693382 |
| NM_001273    | CHD4   | 2081 | 2191 | 6.43972945605 |
| NM_001273    | CHD4   | 5420 | 5644 | 7.09180615263 |
| NM_001273    | CHD4   | 1498 | 1702 | 8.15593649005 |
| NM_001273    | CHD4   | 2275 | 2470 | 7.33281425213 |
| NM_001273    | CHD4   | 5261 | 5386 | 6.80229953544 |
| NM_001273    | CHD4   | 4260 | 4442 | 5.95430262888 |
| NM_001273    | CHD4   | 2647 | 2742 | 6.80229953544 |
| NM_001273    | CHD4   | 2525 | 2620 | 5.63237453399 |
| NM_001273    | CHD4   | 2193 | 2265 | 4.54823532461 |
| NM_001273    | CHD4   | 609  | 675  | 5.63237429807 |
| NM_001273    | CHD4   | 2746 | 2936 | 7.63237453399 |
| NM_001273    | CHD4   | 3305 | 3499 | 7.63237453399 |
| NM_001273    | CHD4   | 3727 | 4004 | 7.43972945605 |
| NM_001273    | CHD4   | 2938 | 3268 | 8.38726203616 |
| NM_001273    | CHD4   | 176  | 328  | 5.95430262888 |
| NM_001273    | CHD4   | 1795 | 2029 | 6.80229953544 |

|              |       |      |      |               |
|--------------|-------|------|------|---------------|
| NM_001273    | CHD4  | 3501 | 3710 | 7.5392651296  |
| NM_001273    | CHD4  | 5702 | 5837 | 5.95430262888 |
| NM_001018054 | LRP8  | 2193 | 2253 | 8.36323818107 |
| NM_001018054 | LRP8  | 414  | 519  | 8.36725554533 |
| NM_001271    | CHD2  | 429  | 485  | 3.6350816271  |
| NM_001271    | CHD2  | 6443 | 6550 | 5.3041833372  |
| NM_001271    | CHD2  | 1391 | 1477 | 3.71922060057 |
| NM_001271    | CHD2  | 7225 | 7283 | 4.71904708617 |
| NM_001271    | CHD2  | 7508 | 7612 | 3.71922082894 |
| NM_001270    | CHD1  | 2043 | 2115 | 6.24268575926 |
| NM_001270    | CHD1  | 1791 | 1822 | 4.65370565836 |
| NM_001270    | CHD1  | 1640 | 1719 | 6.24267902821 |
| NM_001278    | CHUK  | 3129 | 3188 | 5.57689324705 |
| NM_001278    | CHUK  | 122  | 172  | 7.16168872851 |
| NM_001278    | CHUK  | 468  | 508  | 6.49276076872 |
| NM_001278    | CHUK  | 641  | 716  | 6.57689997788 |
| NM_001278    | CHUK  | 278  | 362  | 6.5768999781  |
| NM_001278    | CHUK  | 1858 | 1917 | 7.16168872851 |
| NM_001278    | CHUK  | 595  | 631  | 5.57672622779 |
| NM_001278    | CHUK  | 2105 | 2158 | 7.16185574777 |
| NM_001278    | CHUK  | 1208 | 1294 | 6.57689974219 |
| NM_001278    | CHUK  | 836  | 953  | 7.16186247883 |
| NM_001278    | CHUK  | 2264 | 2332 | 6.57288237793 |
| NM_001278    | CHUK  | 1061 | 1151 | 7.16186224291 |
| NM_197962    | GLRX2 | 285  | 344  | 10.5635422967 |
| NM_197962    | GLRX2 | 361  | 400  | 10.2414406874 |
| NM_197962    | GLRX2 | 209  | 280  | 10.2416144377 |
| NM_000584    | IL8   | 1387 | 1473 | 9.32460380242 |
| NM_000584    | IL8   | 1584 | 1680 | 12.7840354211 |
| NM_000584    | IL8   | 1136 | 1190 | 9.32459707136 |
| NM_000584    | IL8   | 860  | 921  | 11.3246038024 |
| NM_000584    | IL8   | 941  | 991  | 9.32460379487 |
| NM_000584    | IL8   | 1495 | 1576 | 11.9095663031 |
| NM_000584    | IL8   | 525  | 596  | 11.6465318973 |
| NM_000584    | IL8   | 91   | 514  | 14.534057168  |
| NM_197960    | DPP8  | 561  | 638  | 7.2935169644  |
| NM_197960    | DPP8  | 220  | 279  | 8.29753432865 |
| NM_000581    | GPX1  | 555  | 601  | 7.51660398649 |
| NM_000581    | GPX1  | 195  | 297  | 6.0157739641  |
| NM_021145    | DMTF1 | 1954 | 2011 | 4.97887200513 |
| NM_021145    | DMTF1 | 1555 | 1632 | 4.98271585498 |
| NM_021145    | DMTF1 | 2107 | 2192 | 4.9828896053  |
| NM_021145    | DMTF1 | 553  | 634  | 6.56785210602 |
| NM_021141    | XRCC5 | 2453 | 2531 | 5.92772318571 |
| NM_021141    | XRCC5 | 350  | 435  | 5.63821656852 |
| NM_021141    | XRCC5 | 3199 | 3237 | 4.04923646762 |
| NM_021141    | XRCC5 | 441  | 571  | 5.92772318571 |
| NM_021141    | XRCC5 | 2845 | 2933 | 4.0532540678  |
| NM_021141    | XRCC5 | 2293 | 2432 | 6.55575440833 |
| NM_021141    | XRCC5 | 114  | 332  | 7.16873128522 |

|           |        |      |      |               |
|-----------|--------|------|------|---------------|
| NM_021141 | XRCC5  | 3271 | 3385 | 4.0532540678  |
| NM_021141 | XRCC5  | 721  | 992  | 7.22317906924 |
| NM_021141 | XRCC5  | 2535 | 2723 | 6.37518216268 |
| NM_021141 | XRCC5  | 1012 | 1663 | 8.92772318571 |
| NM_021141 | XRCC5  | 2092 | 2262 | 5.63821656852 |
| NM_021141 | XRCC5  | 1670 | 2092 | 8.14071690905 |
| NM_021149 | COTL1  | 407  | 464  | 6.48434335969 |
| NM_021149 | COTL1  | 1729 | 1821 | 7.06947961073 |
| NM_021148 | ZNF273 | 2604 | 2707 | 9.44722138712 |
| NM_012081 | ELL2   | 881  | 948  | 4.08772391057 |
| NM_012081 | ELL2   | 3277 | 3325 | 4.67268641129 |
| NM_012081 | ELL2   | 2317 | 2380 | 3.08772391057 |
| NM_012081 | ELL2   | 2259 | 2298 | 4.00375845151 |
| NM_012081 | ELL2   | 1776 | 1838 | 4.66884256144 |
| NM_012081 | ELL2   | 425  | 548  | 3.08789766088 |
| NM_012081 | ELL2   | 2991 | 3063 | 4.67268641129 |
| NM_012081 | ELL2   | 1508 | 1557 | 4.08789742497 |
| NM_012081 | ELL2   | 2473 | 2532 | 3.00375845151 |
| NM_012084 | GLUD2  | 1741 | 1811 | 6.25171281981 |
| NM_012084 | GLUD2  | 647  | 705  | 4.66675031154 |
| NM_012084 | GLUD2  | 846  | 903  | 5.66675031154 |
| NM_012084 | GLUD2  | 2096 | 2144 | 5.66674358804 |
| NM_012084 | GLUD2  | 502  | 595  | 8.12618193773 |
| NM_012084 | GLUD2  | 1169 | 1234 | 6.66675008317 |
| NM_012084 | GLUD2  | 750  | 812  | 6.25170608876 |
| NM_012084 | GLUD2  | 1648 | 1702 | 4.66675031909 |
| NM_012084 | GLUD2  | 981  | 1165 | 8.25171281981 |
| NM_012084 | GLUD2  | 1344 | 1443 | 7.98867841398 |
| NM_012084 | GLUD2  | 393  | 472  | 6.66675031909 |
| NM_012084 | GLUD2  | 249  | 313  | 5.66674358804 |
| NM_012086 | GTF3C3 | 704  | 765  | 5.43597975666 |
| NM_012086 | GTF3C3 | 2555 | 2594 | 4.43614677592 |
| NM_012086 | GTF3C3 | 1437 | 1596 | 6.75808160186 |
| NM_012086 | GTF3C3 | 1331 | 1423 | 4.43614677592 |
| NM_012087 | GTF3C5 | 1490 | 1548 | 5.69213079398 |
| NM_012087 | GTF3C5 | 498  | 549  | 5.77225240319 |
| NM_012087 | GTF3C5 | 1759 | 1820 | 5.77225240319 |
| NM_012088 | PGLS   | 250  | 291  | 8.59198378258 |
| NM_012088 | PGLS   | 748  | 796  | 6.58797291346 |
| NM_012088 | PGLS   | 619  | 712  | 9.39934543569 |
| NM_012088 | PGLS   | 325  | 382  | 6.59199050608 |
| NM_012088 | PGLS   | 870  | 960  | 6.59199051341 |
| NM_012088 | PGLS   | 395  | 509  | 7.59199051363 |
| NM_012089 | ABCB10 | 1014 | 1095 | 10.1458645564 |
| NM_012089 | ABCB10 | 2040 | 2097 | 8.97593955495 |
| NM_012089 | ABCB10 | 1802 | 1848 | 8.56090205567 |
| NM_012089 | ABCB10 | 1570 | 1703 | 8.97593955495 |
| NM_012089 | ABCB10 | 958  | 1010 | 7.97593282389 |
| NM_012089 | ABCB10 | 2377 | 2432 | 6.97192195478 |
| NM_012089 | ABCB10 | 829  | 952  | 9.29786764984 |

|              |         |      |      |               |
|--------------|---------|------|------|---------------|
| NM_012089    | ABCB10  | 2495 | 2535 | 7.97192195478 |
| NM_012089    | ABCB10  | 1207 | 1452 | 10.5609020557 |
| NM_012089    | ABCB10  | 626  | 729  | 8.97593955495 |
| NM_012089    | ABCB10  | 1096 | 1166 | 7.97593955495 |
| NM_012089    | ABCB10  | 2138 | 2214 | 7.97576580463 |
| NM_001183    | ATP6AP1 | 1982 | 2033 | 5.80923899933 |
| NM_001183    | ATP6AP1 | 752  | 1025 | 9.85363311869 |
| NM_001183    | ATP6AP1 | 1938 | 1980 | 4.80923899178 |
| NM_001183    | ATP6AP1 | 1026 | 1106 | 4.80923876342 |
| NM_001183    | ATP6AP1 | 191  | 409  | 9.50967871748 |
| NM_001183    | ATP6AP1 | 1619 | 1927 | 10.3942015001 |
| NM_001183    | ATP6AP1 | 411  | 568  | 8.50967871748 |
| NM_001183    | ATP6AP1 | 572  | 737  | 7.61659392139 |
| NM_001183    | ATP6AP1 | 50   | 103  | 5.80923226828 |
| NM_001183    | ATP6AP1 | 1127 | 1486 | 9.80923899933 |
| NM_001183    | ATP6AP1 | 1495 | 1599 | 6.80923899933 |
| NM_178190    | ATPIF1  | 408  | 447  | 1.5649834236  |
| NM_178190    | ATPIF1  | 539  | 584  | 1.64894888266 |
| NM_001143883 | PPIAL4B | 523  | 564  | 8.54646901928 |
| NM_001143883 | PPIAL4B | 423  | 457  | 7.54646901927 |
| NM_001143883 | PPIAL4B | 174  | 213  | 7.96150651855 |
| NM_001143883 | PPIAL4B | 656  | 684  | 5.9614997875  |
| NM_001143883 | PPIAL4B | 605  | 642  | 6.96150651855 |
| NM_001143883 | PPIAL4B | 215  | 297  | 7.96150651855 |
| NM_021729    | VPS11   | 1050 | 1080 | 6.90240819749 |
| NM_017670    | OTUB1   | 1372 | 1431 | 3.96389672423 |
| NM_017670    | OTUB1   | 772  | 920  | 5.548865956   |
| NM_017670    | OTUB1   | 730  | 769  | 2.8797642459  |
| NM_017670    | OTUB1   | 1169 | 1242 | 5.28583155017 |
| NM_017670    | OTUB1   | 1561 | 1688 | 4.548865956   |
| NM_017670    | OTUB1   | 997  | 1158 | 5.96390345528 |
| NM_021721    | ADAM22  | 514  | 603  | 9.99823001372 |
| NM_006915    | RP2     | 302  | 345  | 8.30049440597 |
| NM_006915    | RP2     | 3489 | 3540 | 8.96959610853 |
| NM_006915    | RP2     | 1229 | 1278 | 8.38445986504 |
| NM_006915    | RP2     | 361  | 448  | 8.96959588016 |
| NM_006915    | RP2     | 1057 | 1125 | 7.3846268843  |
| NM_021727    | FADS3   | 1098 | 1177 | 9.27593251269 |
| NM_021727    | FADS3   | 731  | 775  | 9.27191491252 |
| NM_021727    | FADS3   | 357  | 426  | 9.86088828236 |
| NM_021727    | FADS3   | 437  | 528  | 10.2759325127 |
| NM_021727    | FADS3   | 664  | 731  | 9.27592578164 |
| NM_021727    | FADS3   | 948  | 1077 | 11.0832874347 |
| NM_021727    | FADS3   | 1277 | 1348 | 9.85687741324 |
| NM_001032221 | STXBP1  | 336  | 402  | 8.37794006454 |
| NM_001032221 | STXBP1  | 2858 | 2941 | 9.37793334103 |
| NM_001032221 | STXBP1  | 1038 | 1069 | 7.2938008627  |
| NM_001032221 | STXBP1  | 1924 | 1976 | 7.37776632177 |
| NM_001032221 | STXBP1  | 777  | 830  | 8.2938008627  |
| NM_001009552 | PPP2CB  | 1568 | 1627 | 5.30192542431 |

|              |        |      |      |               |
|--------------|--------|------|------|---------------|
| NM_001009552 | PPP2CB | 1497 | 1557 | 4.71696292359 |
| NM_001009552 | PPP2CB | 1428 | 1495 | 5.30192543186 |
| NM_001009552 | PPP2CB | 1856 | 1893 | 3.71294533096 |
| NM_001009552 | PPP2CB | 1658 | 1726 | 4.71696269522 |
| NM_001009552 | PPP2CB | 1152 | 1257 | 6.71696293113 |
| NM_001009552 | PPP2CB | 1014 | 1137 | 6.30192543186 |
| NM_001009552 | PPP2CB | 415  | 518  | 4.71696293113 |
| NM_001009552 | PPP2CB | 543  | 762  | 8.4718504333  |
| NM_001009552 | PPP2CB | 1291 | 1392 | 6.03889102602 |
| NM_001009552 | PPP2CB | 915  | 1014 | 6.0388910258  |
| NM_004607    | TBCA   | 192  | 263  | 3.2781534848  |
| NM_004607    | TBCA   | 86   | 155  | 2.86310925447 |
| NM_004607    | TBCA   | 321  | 476  | 3.86311598553 |
| NM_001985    | ETFB   | 471  | 531  | 1.46997309763 |
| NM_001985    | ETFB   | 565  | 678  | 1.88501059691 |
| NM_001985    | ETFB   | 686  | 780  | 2.20693869179 |
| NM_001985    | ETFB   | 26   | 145  | 1.88501059691 |
| NM_001985    | ETFB   | 152  | 314  | 2.69236551896 |
| NM_019857    | CTPS2  | 2105 | 2153 | 7.83355012222 |
| NM_019857    | CTPS2  | 3265 | 3307 | 6.83355012222 |
| NM_019857    | CTPS2  | 378  | 401  | 6.83355012222 |
| NM_019857    | CTPS2  | 1849 | 1942 | 8.83756099134 |
| NM_019857    | CTPS2  | 1285 | 1352 | 6.83739397207 |
| NM_019857    | CTPS2  | 1725 | 1836 | 7.83756772238 |
| NM_001986    | ETV4   | 898  | 949  | 4.11055192421 |
| NM_001986    | ETV4   | 257  | 328  | 4.11055865504 |
| NM_001986    | ETV4   | 1023 | 1085 | 4.69150355581 |
| NM_001986    | ETV4   | 599  | 715  | 4.11055865526 |
| NM_019852    | METTL3 | 1181 | 1220 | 5.75458897987 |
| NM_019852    | METTL3 | 1628 | 1724 | 4.75860658005 |
| NM_019852    | METTL3 | 1437 | 1548 | 5.75860658005 |
| NM_019852    | METTL3 | 1551 | 1619 | 6.75860658005 |
| NM_019852    | METTL3 | 864  | 943  | 7.08053467471 |
| NM_019852    | METTL3 | 770  | 844  | 6.34339533045 |
| NM_019852    | METTL3 | 304  | 372  | 5.75458897987 |
| NM_019852    | METTL3 | 578  | 693  | 5.75860658005 |
| NM_019852    | METTL3 | 73   | 153  | 4.75860658005 |
| NM_019852    | METTL3 | 1230 | 1348 | 7.08053467493 |
| NM_019850    | NGEF   | 1865 | 1919 | 5.54697763554 |
| NM_019850    | NGEF   | 1740 | 1823 | 5.63111684492 |
| NM_019850    | NGEF   | 2129 | 2223 | 6.63111684492 |
| NM_019850    | NGEF   | 3060 | 3125 | 6.63111011387 |
| NM_019850    | NGEF   | 1666 | 1700 | 6.54697763554 |
| NM_001982    | ERBB3  | 4193 | 4245 | 4.2095856313  |
| NM_001982    | ERBB3  | 1288 | 1396 | 4.29372484068 |
| NM_001982    | ERBB3  | 1843 | 1903 | 2.70876233996 |
| NM_001982    | ERBB3  | 61   | 83   | 2.70876233974 |
| NM_001982    | ERBB3  | 3934 | 4003 | 4.70876233996 |
| NM_001982    | ERBB3  | 3091 | 3147 | 4.29371810963 |
| NM_001982    | ERBB3  | 881  | 916  | 4.2095856313  |

|              |         |      |      |               |
|--------------|---------|------|------|---------------|
| NM_001982    | ERBB3   | 1959 | 1998 | 3.70474473978 |
| NM_001982    | ERBB3   | 2618 | 2679 | 4.29372484067 |
| NM_001982    | ERBB3   | 3682 | 3736 | 2.70474473978 |
| NM_001982    | ERBB3   | 4430 | 4522 | 5.29372484068 |
| NM_001982    | ERBB3   | 3550 | 3642 | 2.70876233996 |
| NM_001982    | ERBB3   | 3251 | 3306 | 2.70876233241 |
| NM_001982    | ERBB3   | 3383 | 3415 | 2.62462313057 |
| NM_001982    | ERBB3   | 4705 | 4778 | 3.70474473978 |
| NM_001982    | ERBB3   | 2493 | 2612 | 5.29372484068 |
| NM_001982    | ERBB3   | 600  | 834  | 6.03069043485 |
| NM_001982    | ERBB3   | 4864 | 4988 | 4.29372484068 |
| NM_001982    | ERBB3   | 2087 | 2358 | 6.1681939586  |
| NM_001982    | ERBB3   | 285  | 594  | 6.70876233996 |
| NM_001982    | ERBB3   | 3457 | 3512 | 2.70858858964 |
| NM_001982    | ERBB3   | 4588 | 4700 | 5.51611726202 |
| NM_001982    | ERBB3   | 1549 | 1716 | 5.70876233996 |
| NM_001982    | ERBB3   | 3804 | 3867 | 2.62462313057 |
| NM_001982    | ERBB3   | 2830 | 2899 | 2.70876233241 |
| NM_001982    | ERBB3   | 1201 | 1252 | 2.70876233241 |
| NM_001174072 | SERINC5 | 193  | 245  | 8.76808806416 |
| NM_001174072 | SERINC5 | 671  | 723  | 6.76808806416 |
| NM_001174072 | SERINC5 | 5034 | 5097 | 6.76808806438 |
| NM_001174072 | SERINC5 | 1771 | 1838 | 8.35304383405 |
| NM_001174072 | SERINC5 | 4020 | 4088 | 7.76808133333 |
| NM_001174072 | SERINC5 | 1945 | 1994 | 8.35305032919 |
| NM_001174072 | SERINC5 | 4166 | 4225 | 7.683948855   |
| NM_001174072 | SERINC5 | 2502 | 2596 | 8.76808806438 |
| NM_001174072 | SERINC5 | 262  | 345  | 9.57544298644 |
| NM_001174072 | SERINC5 | 3277 | 3317 | 6.76407046421 |
| NM_001174072 | SERINC5 | 958  | 1084 | 9.57544298644 |
| NM_001174072 | SERINC5 | 4885 | 4938 | 6.76808133333 |
| NM_001174072 | SERINC5 | 1089 | 1245 | 10.4685277825 |
| NM_001174072 | SERINC5 | 6067 | 6151 | 6.76808806416 |
| NM_001174072 | SERINC5 | 770  | 880  | 7.76808806438 |
| NM_001174072 | SERINC5 | 386  | 641  | 11.2916500204 |
| NM_001174072 | SERINC5 | 1313 | 1635 | 10.5754429864 |
| NM_001174072 | SERINC5 | 5512 | 5635 | 8.76808806438 |
| NM_001174072 | SERINC5 | 2376 | 2454 | 9.09001615927 |
| NM_001174072 | SERINC5 | 4335 | 4457 | 8.35305056511 |
| NM_000059    | BRCA2   | 2925 | 3021 | 10.4246089245 |
| NM_000059    | BRCA2   | 2584 | 2656 | 8.83982016658 |
| NM_000059    | BRCA2   | 8276 | 8340 | 8.75568096474 |
| NM_001135998 | NDUFB11 | 602  | 665  | 5.74955272382 |
| NM_001135998 | NDUFB11 | 667  | 866  | 9.14187014659 |
| NM_178229    | IQGAP3  | 5986 | 6045 | 7.5567953728  |
| NM_178229    | IQGAP3  | 3433 | 3489 | 9.1415841232  |
| NM_178229    | IQGAP3  | 3577 | 3677 | 8.47265616341 |
| NM_178229    | IQGAP3  | 5331 | 5381 | 8.55277777262 |
| NM_178229    | IQGAP3  | 1046 | 1101 | 8.55679537257 |
| NM_178229    | IQGAP3  | 3490 | 3565 | 7.55277777262 |

|              |        |      |      |               |
|--------------|--------|------|------|---------------|
| NM_178229    | IQGAP3 | 3289 | 3328 | 7.55662162248 |
| NM_178229    | IQGAP3 | 5569 | 5689 | 10.8787234677 |
| NM_178229    | IQGAP3 | 4997 | 5099 | 7.55679536525 |
| NM_178229    | IQGAP3 | 3752 | 3798 | 7.55277777262 |
| NM_178229    | IQGAP3 | 5889 | 5985 | 7.5567953728  |
| NM_178229    | IQGAP3 | 418  | 594  | 9.5567953728  |
| NM_181514    | MRPL21 | 515  | 616  | 5.68322828019 |
| NM_181514    | MRPL21 | 460  | 501  | 4.68305452987 |
| NM_181514    | MRPL21 | 251  | 442  | 8.14265989883 |
| NM_000052    | ATP7A  | 3922 | 3974 | 10.0274990965 |
| NM_000052    | ATP7A  | 4184 | 4243 | 9.35839739395 |
| NM_000052    | ATP7A  | 1872 | 1934 | 8.44253659578 |
| NM_000052    | ATP7A  | 2199 | 2247 | 8.44236285301 |
| NM_000052    | ATP7A  | 428  | 479  | 10.027492373  |
| NM_000052    | ATP7A  | 2610 | 2736 | 10.7644646982 |
| NM_000052    | ATP7A  | 3066 | 3128 | 8.44236285301 |
| NM_144726    | RNF145 | 491  | 533  | 9.51941115684 |
| NM_144726    | RNF145 | 1406 | 1451 | 7.51958467124 |
| NM_144726    | RNF145 | 878  | 953  | 8.51958489961 |
| NM_144726    | RNF145 | 1182 | 1288 | 9.84151300205 |
| NM_144726    | RNF145 | 628  | 685  | 8.51958467124 |
| NM_144726    | RNF145 | 545  | 613  | 9.51958490716 |
| NM_144726    | RNF145 | 1787 | 1885 | 9.51958490716 |
| NM_144726    | RNF145 | 2108 | 2177 | 9.10052980771 |
| NM_144726    | RNF145 | 340  | 460  | 10.9790165258 |
| NM_144726    | RNF145 | 765  | 870  | 10.1045474079 |
| NM_144726    | RNF145 | 1015 | 1059 | 7.51941115684 |
| NM_144726    | RNF145 | 2397 | 2557 | 8.51958490716 |
| NM_144726    | RNF145 | 3262 | 3339 | 7.51957817611 |
| NM_144723    | ZMAT2  | 22   | 117  | 3.61792377741 |
| NM_144723    | ZMAT2  | 631  | 745  | 4.20289300918 |
| NM_144723    | ZMAT2  | 888  | 1017 | 5.42528543052 |
| NM_000057    | BLM    | 4394 | 4452 | 9.9452401519  |
| NM_000057    | BLM    | 1287 | 1323 | 9.86127469284 |
| NM_000057    | BLM    | 3335 | 3382 | 9.94540717117 |
| NM_000057    | BLM    | 2912 | 2991 | 8.945413902   |
| NM_000057    | BLM    | 3906 | 4013 | 8.94541389467 |
| NM_017909    | RMND1  | 1254 | 1310 | 6.76548037575 |
| NM_001011668 | CHCHD7 | 549  | 616  | 4.64257779509 |
| NM_001011668 | CHCHD7 | 229  | 277  | 4.64275154541 |
| NM_017902    | HIF1AN | 5477 | 5564 | 8.03386305679 |
| NM_017902    | HIF1AN | 939  | 984  | 6.4487268133  |
| NM_017902    | HIF1AN | 2158 | 2222 | 7.36476135423 |
| NM_017902    | HIF1AN | 295  | 359  | 6.44889383256 |
| NM_017902    | HIF1AN | 4267 | 4325 | 8.44889383256 |
| NM_017902    | HIF1AN | 5821 | 5874 | 6.44488296344 |
| NM_017902    | HIF1AN | 1410 | 1467 | 8.02984546416 |
| NM_017902    | HIF1AN | 433  | 493  | 6.4487268133  |
| NM_017902    | HIF1AN | 2808 | 2867 | 6.44890056339 |
| NM_017902    | HIF1AN | 723  | 831  | 8.03386306434 |

|              |         |      |      |               |
|--------------|---------|------|------|---------------|
| NM_017902    | HIF1AN  | 1478 | 1557 | 8.03385633328 |
| NM_017455    | NPTN    | 1199 | 1302 | 6.1156517151  |
| NM_017455    | NPTN    | 1616 | 1701 | 4.79372362021 |
| NM_017455    | NPTN    | 1540 | 1615 | 4.79372362021 |
| NM_017455    | NPTN    | 1711 | 1833 | 5.60107854227 |
| NM_017455    | NPTN    | 1037 | 1194 | 7.04165113365 |
| NM_017455    | NPTN    | 136  | 260  | 5.79372362021 |
| NM_017455    | NPTN    | 802  | 830  | 3.70958441083 |
| NM_017455    | NPTN    | 1969 | 2064 | 5.1156517151  |
| NM_017455    | NPTN    | 851  | 1030 | 6.79372362021 |
| NM_017455    | NPTN    | 445  | 795  | 7.31728557627 |
| NM_017455    | NPTN    | 1887 | 1939 | 4.37867938988 |
| NM_017455    | NPTN    | 282  | 432  | 5.60107854227 |
| NM_017901    | TPCN1   | 1230 | 1270 | 8.68656906983 |
| NM_017901    | TPCN1   | 1807 | 1876 | 9.68674282014 |
| NM_017901    | TPCN1   | 990  | 1069 | 9.42370840676 |
| NM_017901    | TPCN1   | 1725 | 1803 | 7.1017800835  |
| NM_017901    | TPCN1   | 2308 | 2388 | 7.09776271925 |
| NM_017901    | TPCN1   | 1069 | 1131 | 7.1017800835  |
| NM_017906    | PAK1IP1 | 671  | 775  | 7.33694166739 |
| NM_017907    | LAMTOR1 | 507  | 575  | 9.14797394738 |
| NM_017907    | LAMTOR1 | 1082 | 1155 | 8.56301143911 |
| NM_001011663 | PCGF6   | 1779 | 1843 | 8.21267137787 |
| NM_017905    | TMC03   | 1054 | 1120 | 4.83614913553 |
| NM_017905    | TMC03   | 2176 | 2224 | 4.83614914308 |
| NM_017905    | TMC03   | 799  | 859  | 4.83614914286 |
| NM_017905    | TMC03   | 1789 | 1965 | 7.74303973869 |
| NM_017905    | TMC03   | 1153 | 1220 | 3.83597539276 |
| NM_017905    | TMC03   | 1244 | 1415 | 7.74303973869 |
| NM_017905    | TMC03   | 2376 | 2441 | 5.42110491275 |
| NM_017905    | TMC03   | 2526 | 2649 | 5.4211116438  |
| NM_017905    | TMC03   | 1992 | 2174 | 7.00607414452 |
| NM_017905    | TMC03   | 235  | 442  | 7.53658886122 |
| NM_017905    | TMC03   | 1539 | 1772 | 7.29558076172 |
| NM_017905    | TMC03   | 548  | 770  | 7.00607414452 |
| NM_004939    | DDX1    | 406  | 463  | 2.30331264035 |
| NM_004939    | DDX1    | 1388 | 1509 | 2.30347965962 |
| NM_004939    | DDX1    | 1757 | 1895 | 3.88844889139 |
| NM_004938    | DAPK1   | 1208 | 1243 | 6.44727265905 |
| NM_004938    | DAPK1   | 3102 | 3187 | 8.11235676898 |
| NM_004938    | DAPK1   | 3205 | 3268 | 8.85333996332 |
| NM_004938    | DAPK1   | 2527 | 2595 | 6.53141186088 |
| NM_004938    | DAPK1   | 1063 | 1120 | 8.11620061884 |
| NM_004938    | DAPK1   | 2357 | 2427 | 6.44727265905 |
| NM_004938    | DAPK1   | 1718 | 1812 | 8.11637436915 |
| NM_004938    | DAPK1   | 935  | 1047 | 8.53141186821 |
| NM_004938    | DAPK1   | 3005 | 3097 | 8.11637413324 |
| NM_004938    | DAPK1   | 3307 | 3379 | 8.53141163251 |
| NM_004938    | DAPK1   | 5075 | 5181 | 7.53141186821 |
| NM_153207    | AEBP2   | 807  | 881  | 7.09203422914 |



|              |          |      |      |               |               |
|--------------|----------|------|------|---------------|---------------|
| NM_153207    | AEBP2    | 1664 | 1755 | 5.50689821402 |               |
| NM_153207    | AEBP2    | 1350 | 1401 | 5.42293275495 |               |
| NM_153207    | AEBP2    | 696  | 788  | 6.50707172842 |               |
| NM_004930    | CAPZB    | 375  | 431  | 4.52153059112 |               |
| NM_004930    | CAPZB    | 438  | 499  | 4.10247549189 |               |
| NM_004930    | CAPZB    | 1020 | 1122 | 4.10649309206 |               |
| NM_004930    | CAPZB    | 189  | 259  | 5.52153059134 |               |
| NM_004930    | CAPZB    | 1318 | 1356 | 3.43739138196 |               |
| NM_004930    | CAPZB    | 1366 | 1430 | 4.10649309206 |               |
| NM_004930    | CAPZB    | 1470 | 1561 | 2.51751299117 |               |
| NM_004930    | CAPZB    | 512  | 666  | 5.98096220998 |               |
| NM_004930    | CAPZB    | 260  | 355  | 4.10649309206 |               |
| NM_004930    | CAPZB    | 718  | 1019 | 6.84345868623 |               |
| NM_004937    | CTNS     | 561  | 654  | 10.3202939329 |               |
| NM_004937    | CTNS     | 1111 | 1154 | 7.99836583064 |               |
| NM_004937    | CTNS     | 1606 | 1658 | 7.99434823802 |               |
| NM_004937    | CTNS     | 2308 | 2366 | 7.99835910713 |               |
| NM_004937    | CTNS     | 1262 | 1334 | 8.9142266288  |               |
| NM_004937    | CTNS     | 1336 | 1415 | 9.58332810299 |               |
| NM_004247    | EFTUD2   | 439  | 510  | 4.77672149584 |               |
| NM_004247    | EFTUD2   | 1597 | 1704 | 6.58425016822 |               |
| NM_004247    | EFTUD2   | 2124 | 2232 | 7.09882334105 |               |
| NM_004247    | EFTUD2   | 839  | 920  | 6.77689524616 |               |
| NM_004247    | EFTUD2   | 2706 | 2778 | 6.09882334105 |               |
| NM_004247    | EFTUD2   | 3111 | 3166 | 6.09882334105 |               |
| NM_004247    | EFTUD2   | 582  | 684  | 6.58425016822 |               |
| NM_004247    | EFTUD2   | 1375 | 1475 | 4.77689524616 |               |
| NM_004247    | EFTUD2   | 2241 | 2362 | 7.09882334105 |               |
| NM_004247    | EFTUD2   | 1213 | 1330 | 5.36185774688 |               |
| NM_004247    | EFTUD2   | 1477 | 1595 | 5.77689524616 |               |
| NM_004247    | EFTUD2   | 243  | 433  | 7.2363268648  |               |
| NM_004247    | EFTUD2   | 2825 | 3012 | 7.86435808741 |               |
| NM_004247    | EFTUD2   | 2365 | 2561 | 6.9468202476  |               |
| NM_004247    | EFTUD2   | 693  | 802  | 4.77689524616 |               |
| NM_004247    | EFTUD2   | 3174 | 3331 | 6.09882334105 |               |
| NM_004247    | EFTUD2   | 2593 | 2648 | 4.77689524616 |               |
| NM_004247    | EFTUD2   | 1099 | 1192 | 6.58425016822 |               |
| NM_004247    | EFTUD2   | 1828 | 2066 | 7.77689524616 |               |
| NM_004247    | EFTUD2   | 924  | 1080 | 6.9468202476  |               |
| NM_006912    | RIT1     | 862  | 902  | 6.23085045435 |               |
| NM_001001410 | C16orf42 |      | 627  | 672           | 5.78422167431 |
| NM_001001410 | C16orf42 |      | 521  | 569           | 5.7842149508  |
| NM_001001410 | C16orf42 |      | 570  | 614           | 5.70008247247 |
| NM_001001419 | SMAD5    | 117  | 193  | 7.83447291597 |               |
| NM_001001419 | SMAD5    | 4073 | 4185 | 8.41943541669 |               |
| NM_001001419 | SMAD5    | 4189 | 4251 | 6.8304553158  |               |
| NM_001001419 | SMAD5    | 6399 | 6455 | 6.75033370658 |               |
| NM_001001419 | SMAD5    | 638  | 683  | 8.41943518077 |               |
| NM_001001419 | SMAD5    | 6302 | 6398 | 7.83447290842 |               |
| NM_001001419 | SMAD5    | 684  | 781  | 9.41943541669 |               |

|              |         |      |      |               |
|--------------|---------|------|------|---------------|
| NM_001001419 | SMAD5   | 328  | 476  | 10.641827838  |
| NM_001001419 | SMAD5   | 5626 | 5674 | 7.83447291596 |
| NM_001001419 | SMAD5   | 2619 | 2673 | 8.41541781652 |
| NM_001001419 | SMAD5   | 4905 | 4956 | 6.75033370658 |
| NM_001001419 | SMAD5   | 6673 | 6906 | 9.83447291597 |
| NM_001001419 | SMAD5   | 1867 | 1945 | 8.41943541669 |
| NM_001001419 | SMAD5   | 1434 | 1585 | 9.15640101086 |
| NM_001001419 | SMAD5   | 2820 | 2901 | 7.83447291575 |
| NM_001001419 | SMAD5   | 3495 | 3578 | 6.83446618491 |
| NM_001001419 | SMAD5   | 194  | 284  | 6.75033370658 |
| NM_001001419 | SMAD5   | 3584 | 3685 | 7.83447291597 |
| NM_001001419 | SMAD5   | 6999 | 7080 | 8.41943541668 |
| NM_184043    | ALDOA   | 1097 | 1514 | 4.08988394768 |
| NM_184043    | ALDOA   | 147  | 760  | 5.36551839029 |
| NM_184043    | ALDOA   | 779  | 1087 | 3.92941927548 |
| NM_198514    | NHLRC2  | 5977 | 6055 | 7.09268246492 |
| NM_198514    | NHLRC2  | 50   | 83   | 7.09250871461 |
| NM_198514    | NHLRC2  | 718  | 775  | 8.09250871461 |
| NM_198514    | NHLRC2  | 451  | 541  | 9.09268246471 |
| NM_198514    | NHLRC2  | 4250 | 4302 | 7.00854325554 |
| NM_000638    | VTN     | 117  | 147  | 3.18461260255 |
| NM_000638    | VTN     | 546  | 591  | 5.18461260255 |
| NM_000638    | VTN     | 606  | 750  | 6.18863020273 |
| NM_000638    | VTN     | 1584 | 1640 | 4.77358597239 |
| NM_000638    | VTN     | 1004 | 1135 | 6.88906992087 |
| NM_000638    | VTN     | 1150 | 1217 | 4.77359270345 |
| NM_000638    | VTN     | 762  | 932  | 7.51055829761 |
| NM_000638    | VTN     | 163  | 530  | 8.09552079833 |
| NM_000638    | VTN     | 1278 | 1577 | 7.64806182136 |
| NM_000638    | VTN     | 48   | 109  | 4.7735926959  |
| NM_001135195 | SLC39A5 | 456  | 507  | 6.54481796166 |
| NM_001135195 | SLC39A5 | 163  | 217  | 5.54498498093 |
| NM_001135195 | SLC39A5 | 354  | 409  | 6.54498498093 |
| NM_001135195 | SLC39A5 | 1183 | 1250 | 6.54499171198 |
| NM_001135195 | SLC39A5 | 264  | 318  | 6.54481796166 |
| NM_001135195 | SLC39A5 | 122  | 160  | 5.4608525026  |
| NM_001135195 | SLC39A5 | 649  | 782  | 8.35234663404 |
| NM_001135669 | XPR1    | 750  | 837  | 8.31145191663 |
| NM_001135669 | XPR1    | 2184 | 2282 | 8.89641441735 |
| NM_001135669 | XPR1    | 1287 | 1332 | 6.72648940836 |
| NM_001135669 | XPR1    | 1132 | 1205 | 7.31145191663 |
| NM_001135669 | XPR1    | 7982 | 8055 | 6.72648940836 |
| NM_001135669 | XPR1    | 610  | 659  | 7.31145190908 |
| NM_001135669 | XPR1    | 1770 | 1952 | 10.1859210345 |
| NM_001135669 | XPR1    | 3935 | 3969 | 5.72247181574 |
| NM_001135669 | XPR1    | 1671 | 1761 | 8.89641441735 |
| NM_001135669 | XPR1    | 892  | 988  | 8.53384433797 |
| NM_001135669 | XPR1    | 1953 | 1994 | 6.72648268486 |
| NM_001135669 | XPR1    | 253  | 401  | 8.0484175108  |
| NM_001135669 | XPR1    | 1338 | 1565 | 9.72648941591 |

|              |          |      |      |               |               |
|--------------|----------|------|------|---------------|---------------|
| NM_001135669 | XPR1     | 2021 | 2132 | 9.0484175108  |               |
| NM_001135669 | XPR1     | 1565 | 1659 | 8.0484175108  |               |
| NM_001135669 | XPR1     | 2369 | 2441 | 5.72648268486 |               |
| NM_001135669 | XPR1     | 999  | 1127 | 8.0484175108  |               |
| NM_000636    | SOD2     | 1091 | 1148 | 5.71612209593 |               |
| NM_000636    | SOD2     | 981  | 1078 | 7.15669468731 |               |
| NM_000636    | SOD2     | 1307 | 1391 | 5.90876717387 |               |
| NM_000636    | SOD2     | 222  | 981  | 9.79141022323 |               |
| NM_000636    | SOD2     | 69   | 218  | 6.60920689201 |               |
| NM_000636    | SOD2     | 1154 | 1302 | 6.23069526876 |               |
| NM_000637    | GSR      | 1712 | 1797 | 7.54205125833 |               |
| NM_000637    | GSR      | 1200 | 1233 | 4.95307115744 |               |
| NM_000637    | GSR      | 714  | 758  | 4.95307115744 |               |
| NM_000637    | GSR      | 1825 | 1918 | 6.54205125078 |               |
| NM_000637    | GSR      | 1253 | 1383 | 5.95708875761 |               |
| NM_000637    | GSR      | 843  | 997  | 5.95708875761 |               |
| NM_000637    | GSR      | 419  | 608  | 8.65752847575 |               |
| NM_000637    | GSR      | 1497 | 1648 | 6.95708875761 |               |
| NM_000637    | GSR      | 1019 | 1196 | 8.41652037625 |               |
| NM_003583    | DYRK2    | 4720 | 4765 | 9.72776158376 |               |
| NM_001202504 | CTDP1    | 296  | 355  | 9.47753313675 |               |
| NM_001202504 | CTDP1    | 105  | 168  | 9.39741152754 |               |
| NM_139177    | SLC39A11 |      | 1239 | 1298          | 7.12225354992 |
| NM_139177    | SLC39A11 |      | 704  | 782           | 8.12225378584 |
| NM_139177    | SLC39A11 |      | 430  | 530           | 7.12225378584 |
| NM_139177    | SLC39A11 |      | 2653 | 2726          | 7.11823618567 |
| NM_139177    | SLC39A11 |      | 252  | 296           | 7.03811457646 |
| NM_139177    | SLC39A11 |      | 1068 | 1126          | 8.44418188073 |
| NM_139177    | SLC39A11 |      | 307  | 429           | 8.9296087079  |
| NM_139177    | SLC39A11 |      | 149  | 239           | 7.12225378583 |
| NM_001202502 | NIPSNAP1 |      | 1115 | 1178          | 3.26144083064 |
| NM_001202502 | NIPSNAP1 |      | 502  | 556           | 4.3454062897  |
| NM_001202502 | NIPSNAP1 |      | 1689 | 1743          | 3.34558003247 |
| NM_001202502 | NIPSNAP1 |      | 622  | 662           | 4.93036879043 |
| NM_001202502 | NIPSNAP1 |      | 1414 | 1478          | 3.34156243985 |
| NM_001202502 | NIPSNAP1 |      | 1483 | 1539          | 3.3455798041  |
| NM_001202502 | NIPSNAP1 |      | 848  | 1067          | 6.80501165866 |
| NM_001202502 | NIPSNAP1 |      | 249  | 385           | 5.66750813491 |
| NM_032339    | MIEN1    | 385  | 449  | 8.60078779441 |               |
| NM_020458    | TTC7A    | 2352 | 2395 | 7.35782787836 |               |
| NM_198097    | C7orf28B |      | 235  | 312           | 6.45885173692 |
| NM_198097    | C7orf28B |      | 312  | 359           | 4.05278443265 |
| NM_198097    | C7orf28B |      | 1054 | 1134          | 6.13692364204 |
| NM_198097    | C7orf28B |      | 997  | 1049          | 4.05278443265 |
| NM_198097    | C7orf28B |      | 845  | 896           | 5.13692340612 |
| NM_198097    | C7orf28B |      | 934  | 997           | 5.72188590684 |
| NM_198097    | C7orf28B |      | 1385 | 1460          | 5.13692364204 |
| NM_198097    | C7orf28B |      | 1517 | 1808          | 8.13692364204 |
| NM_198097    | C7orf28B |      | 1305 | 1384          | 6.13692340612 |
| NM_198097    | C7orf28B |      | 731  | 818           | 5.72188613521 |

|           |          |      |      |     |               |
|-----------|----------|------|------|-----|---------------|
| NM_198097 | C7orf28B |      | 599  | 670 | 5.13691691098 |
| NM_198097 | C7orf28B |      | 378  | 529 | 6.13692364204 |
| NM_025132 | WDR19    | 4400 | 4454 |     | 9.44224407648 |
| NM_020453 | ATP10D   | 1421 | 1460 |     | 10.324970498  |
| NM_020453 | ATP10D   | 3574 | 3645 |     | 10.4091096998 |
| NM_020453 | ATP10D   | 3463 | 3510 |     | 10.324970498  |
| NM_020453 | ATP10D   | 2385 | 2448 |     | 11.9900546079 |
| NM_020453 | ATP10D   | 4810 | 4908 |     | 10.4050921072 |
| NM_020453 | ATP10D   | 29   | 116  |     | 11.324970498  |
| NM_025130 | HKDC1    | 394  | 437  |     | 6.81314526924 |
| NM_025130 | HKDC1    | 1408 | 1460 |     | 9.13507360004 |
| NM_025130 | HKDC1    | 2522 | 2586 |     | 6.81314550515 |
| NM_025130 | HKDC1    | 479  | 571  |     | 10.6205004272 |
| NM_025130 | HKDC1    | 3377 | 3448 |     | 8.39810800588 |
| NM_025130 | HKDC1    | 911  | 999  |     | 8.81314550515 |
| NM_025130 | HKDC1    | 2242 | 2300 |     | 7.81314550515 |
| NM_025130 | HKDC1    | 1528 | 1566 |     | 7.8131387741  |
| NM_025130 | HKDC1    | 1746 | 1986 |     | 11.2054629279 |
| NM_025130 | HKDC1    | 3305 | 3372 |     | 8.39810800588 |
| NM_025130 | HKDC1    | 156  | 343  |     | 10.6205004272 |
| NM_025130 | HKDC1    | 36   | 132  |     | 9.81314550515 |
| NM_025130 | HKDC1    | 2650 | 2809 |     | 9.81314550515 |
| NM_025130 | HKDC1    | 1987 | 2241 |     | 11.3981080059 |
| NM_025130 | HKDC1    | 1568 | 1739 |     | 9.81314550515 |
| NM_025130 | HKDC1    | 573  | 907  |     | 11.9006083464 |
| NM_025130 | HKDC1    | 999  | 1398 |     | 12.0610730186 |
| NM_025130 | HKDC1    | 3029 | 3269 |     | 10.1350736    |
| NM_025130 | HKDC1    | 3490 | 3657 |     | 9.39810800588 |
| NM_025130 | HKDC1    | 2867 | 2971 |     | 8.81314550515 |
| NM_025130 | HKDC1    | 2350 | 2495 |     | 9.9830705066  |
| NM_020451 | SEPN1    | 1888 | 1936 |     | 8.13687078356 |
| NM_020451 | SEPN1    | 2294 | 2341 |     | 10.1368707836 |
| NM_020451 | SEPN1    | 3320 | 3377 |     | 9.13687751461 |
| NM_020451 | SEPN1    | 1958 | 2041 |     | 8.1368772787  |
| NM_020451 | SEPN1    | 1822 | 1852 |     | 8.05273830523 |
| NM_020451 | SEPN1    | 1000 | 1099 |     | 10.9442324367 |
| NM_020451 | SEPN1    | 1322 | 1410 |     | 8.13687751439 |
| NM_020451 | SEPN1    | 2734 | 2771 |     | 9.13687078356 |
| NM_020451 | SEPN1    | 520  | 592  |     | 9.13687750707 |
| NM_020451 | SEPN1    | 214  | 347  |     | 9.72184001534 |
| NM_025136 | OPA3     | 2314 | 2383 |     | 9.47430387261 |
| NM_025136 | OPA3     | 1819 | 1882 |     | 8.47430387284 |
| NM_025136 | OPA3     | 4178 | 4216 |     | 8.47430363692 |
| NM_025136 | OPA3     | 1508 | 1558 |     | 8.47430387283 |
| NM_025136 | OPA3     | 645  | 682  |     | 8.39016466345 |
| NM_025137 | SPG11    | 6046 | 6092 |     | 7.10417231305 |
| NM_025137 | SPG11    | 1920 | 2012 |     | 8.10433933232 |
| NM_025134 | CHD9     | 2966 | 3040 |     | 6.31314787058 |
| NM_025134 | CHD9     | 8122 | 8181 |     | 6.31314787058 |
| NM_016331 | ZNF639   | 528  | 589  |     | 6.69248035388 |

|              |         |      |      |               |
|--------------|---------|------|------|---------------|
| NM_016331    | ZNF639  | 270  | 350  | 5.69248035388 |
| NM_001079841 | OCIAD1  | 943  | 1005 | 7.38673667961 |
| NM_001079841 | OCIAD1  | 703  | 777  | 8.03881337619 |
| NM_001079841 | OCIAD1  | 816  | 938  | 8.38673667961 |
| NM_001079841 | OCIAD1  | 65   | 311  | 8.749306759   |
| NM_001079841 | OCIAD1  | 1016 | 1246 | 8.03881337619 |
| NM_001079841 | OCIAD1  | 323  | 445  | 8.16434425827 |
| NM_001079841 | OCIAD1  | 456  | 603  | 8.827309271   |
| NM_016505    | ZCCHC17 | 275  | 368  | 5.17198652554 |
| NM_016504    | MRPL27  | 576  | 614  | 5.2536282382  |
| NM_172069    | PLEKHH2 | 1460 | 1539 | 8.05626453776 |
| NM_172069    | PLEKHH2 | 5988 | 6028 | 7.97614292855 |
| NM_172069    | PLEKHH2 | 5455 | 5506 | 8.06028213793 |
| NM_172069    | PLEKHH2 | 3561 | 3604 | 8.05626453776 |
| NM_172069    | PLEKHH2 | 4167 | 4209 | 8.05626453776 |
| NM_172069    | PLEKHH2 | 2050 | 2082 | 8.97614292855 |
| NM_172069    | PLEKHH2 | 6588 | 6645 | 9.56110542927 |
| NM_172069    | PLEKHH2 | 2815 | 2891 | 9.06028213039 |
| NM_172069    | PLEKHH2 | 6694 | 6795 | 9.64524463866 |
| NM_172069    | PLEKHH2 | 1156 | 1265 | 8.06010838762 |
| NM_016019    | LUC7L2  | 1713 | 1764 | 4.42928183954 |
| NM_016019    | LUC7L2  | 1936 | 2019 | 5.42928183954 |
| NM_016019    | LUC7L2  | 1876 | 1936 | 4.10735374465 |
| NM_016019    | LUC7L2  | 819  | 935  | 2.10735374465 |
| NM_016019    | LUC7L2  | 998  | 1122 | 4.69231624538 |
| NM_016019    | LUC7L2  | 2159 | 2358 | 5.56678536329 |
| NM_016019    | LUC7L2  | 1365 | 1543 | 4.69231624538 |
| NM_016019    | LUC7L2  | 435  | 685  | 6.10735374465 |
| NM_016019    | LUC7L2  | 2034 | 2158 | 4.10735374465 |
| NM_016019    | LUC7L2  | 123  | 262  | 3.10735374465 |
| NM_017987    | RUFY2   | 4240 | 4300 | 6.71765228368 |
| NM_017987    | RUFY2   | 3326 | 3380 | 5.79777389289 |
| NM_001008697 | TFIP11  | 2203 | 2333 | 8.11657344017 |
| NM_001008697 | TFIP11  | 52   | 121  | 6.5316109319  |
| NM_001008697 | TFIP11  | 153  | 206  | 6.53160420839 |
| NM_001008697 | TFIP11  | 1646 | 1690 | 6.53160420839 |
| NM_001008697 | TFIP11  | 1491 | 1552 | 8.52759333927 |
| NM_001008697 | TFIP11  | 725  | 824  | 7.5316109319  |
| NM_001008697 | TFIP11  | 2422 | 2486 | 7.53161093922 |
| NM_001008697 | TFIP11  | 1762 | 1861 | 8.53161093945 |
| NM_153260    | LRR57   | 193  | 253  | 8.12700086985 |
| NM_153260    | LRR57   | 1369 | 1421 | 8.12700086985 |
| NM_153260    | LRR57   | 339  | 400  | 9.13101846248 |
| NM_002184    | IL6ST   | 7183 | 7249 | 6.11638572307 |
| NM_002184    | IL6ST   | 6819 | 6892 | 5.70135495484 |
| NM_002184    | IL6ST   | 5823 | 5864 | 4.1163922182  |
| NM_002184    | IL6ST   | 7078 | 7167 | 5.70135471892 |
| NM_002184    | IL6ST   | 1554 | 1611 | 5.11639244657 |
| NM_002184    | IL6ST   | 505  | 573  | 4.03225324474 |
| NM_002184    | IL6ST   | 6152 | 6217 | 5.1163924539  |

|           |         |      |      |               |
|-----------|---------|------|------|---------------|
| NM_002184 | IL6ST   | 5571 | 5630 | 6.11639245412 |
| NM_002184 | IL6ST   | 7275 | 7320 | 5.70118120453 |
| NM_002184 | IL6ST   | 6439 | 6493 | 5.11639244657 |
| NM_002184 | IL6ST   | 1072 | 1140 | 5.70135471892 |
| NM_002184 | IL6ST   | 5104 | 5208 | 5.70135495462 |
| NM_002184 | IL6ST   | 2614 | 2657 | 6.70135495484 |
| NM_002184 | IL6ST   | 599  | 655  | 6.11639245412 |
| NM_002184 | IL6ST   | 283  | 351  | 6.11639244657 |
| NM_002184 | IL6ST   | 5691 | 5794 | 4.11639245412 |
| NM_002184 | IL6ST   | 989  | 1065 | 7.43832054901 |
| NM_002184 | IL6ST   | 2546 | 2599 | 6.70135495484 |
| NM_002184 | IL6ST   | 218  | 263  | 5.70135495484 |
| NM_002184 | IL6ST   | 3654 | 3706 | 4.1163922182  |
| NM_002184 | IL6ST   | 4027 | 4085 | 6.43832054146 |
| NM_002184 | IL6ST   | 853  | 930  | 6.70135495484 |
| NM_002184 | IL6ST   | 1974 | 2094 | 7.57582407276 |
| NM_002184 | IL6ST   | 3026 | 3110 | 6.11639245412 |
| NM_002184 | IL6ST   | 3168 | 3349 | 7.92374737618 |
| NM_002184 | IL6ST   | 6603 | 6700 | 5.70135495484 |
| NM_002184 | IL6ST   | 6943 | 7053 | 4.11639245412 |
| NM_002184 | IL6ST   | 2363 | 2514 | 6.11639245412 |
| NM_002184 | IL6ST   | 2686 | 2767 | 6.11639245412 |
| NM_002184 | IL6ST   | 2828 | 3021 | 7.57582407276 |
| NM_002184 | IL6ST   | 4295 | 4361 | 4.11639245412 |
| NM_002184 | IL6ST   | 4839 | 4912 | 5.1163924539  |
| NM_002184 | IL6ST   | 699  | 826  | 6.70135495484 |
| NM_002184 | IL6ST   | 1141 | 1448 | 8.92374737618 |
| NM_002184 | IL6ST   | 1707 | 1972 | 7.81683217226 |
| NM_002184 | IL6ST   | 3114 | 3168 | 5.1163924539  |
| NM_002184 | IL6ST   | 2112 | 2270 | 8.02328304973 |
| NM_002184 | IL6ST   | 364  | 489  | 7.11639245412 |
| NM_002180 | IGHMBP2 | 3649 | 3684 | 10.7114454504 |
| NM_002180 | IGHMBP2 | 1059 | 1102 | 9.70742785048 |
| NM_002180 | IGHMBP2 | 378  | 421  | 10.2962342011 |
| NM_002180 | IGHMBP2 | 749  | 802  | 9.70742785048 |
| NM_002180 | IGHMBP2 | 2577 | 2614 | 9.70742785048 |
| NM_002180 | IGHMBP2 | 2006 | 2067 | 8.70742785048 |
| NM_002180 | IGHMBP2 | 86   | 159  | 10.2964077155 |
| NM_002180 | IGHMBP2 | 464  | 566  | 10.2964079514 |
| NM_002180 | IGHMBP2 | 1660 | 1751 | 8.71144521473 |
| NM_013363 | PCOLCE2 | 399  | 465  | 9.29336743663 |
| NM_207344 | SPRYD4  | 950  | 1023 | 9.57633532327 |
| NM_013366 | ANAPC2  | 845  | 933  | 7.16603886236 |
| NM_013366 | ANAPC2  | 2064 | 2154 | 8.08591725315 |
| NM_013366 | ANAPC2  | 1739 | 1783 | 7.08591725315 |
| NM_013366 | ANAPC2  | 1243 | 1311 | 8.17005646232 |
| NM_013366 | ANAPC2  | 472  | 531  | 8.75501895571 |
| NM_013366 | ANAPC2  | 1989 | 2036 | 7.17004973148 |
| NM_013366 | ANAPC2  | 1340 | 1423 | 7.17005646253 |
| NM_013366 | ANAPC2  | 1484 | 1563 | 7.16988271222 |

|           |        |       |       |               |
|-----------|--------|-------|-------|---------------|
| NM_013367 | ANAPC4 | 2145  | 2201  | 8.04118520762 |
| NM_013367 | ANAPC4 | 1418  | 1494  | 8.62614770834 |
| NM_013367 | ANAPC4 | 698   | 751   | 8.04118521495 |
| NM_013367 | ANAPC4 | 2335  | 2402  | 8.04118521517 |
| NM_013367 | ANAPC4 | 2036  | 2142  | 9.04118521517 |
| NM_018482 | ASAP1  | 5734  | 5798  | 6.04613931409 |
| NM_018482 | ASAP1  | 4024  | 4104  | 6.04613931409 |
| NM_018482 | ASAP1  | 2340  | 2405  | 7.13027851592 |
| NM_018489 | ASH1L  | 3212  | 3267  | 7.28333056677 |
| NM_018489 | ASH1L  | 10123 | 10191 | 6.36345217598 |
| NM_018489 | ASH1L  | 7844  | 7883  | 6.28333056677 |
| NM_018489 | ASH1L  | 1448  | 1521  | 7.36746954024 |
| NM_018489 | ASH1L  | 8304  | 8389  | 7.86829306749 |
| NM_018489 | ASH1L  | 2909  | 2944  | 6.36345217598 |
| NM_018489 | ASH1L  | 6013  | 6066  | 6.28333056677 |
| NM_018489 | ASH1L  | 4403  | 4443  | 7.36345217598 |
| NM_018489 | ASH1L  | 4955  | 5055  | 8.95243227688 |
| NM_018489 | ASH1L  | 8187  | 8269  | 6.36345217598 |
| NM_018489 | ASH1L  | 8686  | 8762  | 7.36746954024 |
| NM_018489 | ASH1L  | 8064  | 8147  | 8.36345217598 |
| NM_018489 | ASH1L  | 3305  | 3381  | 6.3674697686  |
| NM_018489 | ASH1L  | 5252  | 5325  | 7.36345217598 |
| NM_018489 | ASH1L  | 2252  | 2377  | 8.36746977615 |
| NM_018489 | ASH1L  | 1584  | 1679  | 7.3674630451  |
| NM_018489 | ASH1L  | 7149  | 7240  | 7.36746977615 |
| NM_002360 | MAFK   | 2315  | 2418  | 8.16976415273 |
| NM_002360 | MAFK   | 610   | 660   | 5.58480141609 |
| NM_002360 | MAFK   | 2793  | 2877  | 7.16976415272 |
| NM_002360 | MAFK   | 1810  | 1882  | 6.58480165201 |
| NM_002360 | MAFK   | 1910  | 1958  | 6.50066244263 |
| NM_002360 | MAFK   | 2485  | 2517  | 5.58078405184 |
| NM_002360 | MAFK   | 1964  | 1997  | 5.58078405184 |
| NM_002360 | MAFK   | 1519  | 1618  | 7.9067297469  |
| NM_002360 | MAFK   | 1375  | 1470  | 7.16976415273 |
| NM_002360 | MAFK   | 738   | 787   | 5.584801652   |
| NM_002360 | MAFK   | 1624  | 1708  | 5.58480165179 |
| NM_002360 | MAFK   | 2912  | 3075  | 8.9067297469  |
| NM_002360 | MAFK   | 3274  | 3346  | 6.58480165201 |
| NM_002360 | MAFK   | 2046  | 2137  | 7.16976415273 |
| NM_002360 | MAFK   | 457   | 542   | 6.58480165201 |
| NM_002360 | MAFK   | 2582  | 2680  | 7.58480165201 |
| NM_012200 | B3GAT3 | 970   | 1017  | 7.87603528325 |
| NM_012200 | B3GAT3 | 234   | 256   | 7.21095117332 |
| NM_012200 | B3GAT3 | 1261  | 1348  | 7.8798791331  |
| NM_012200 | B3GAT3 | 344   | 453   | 8.61701847759 |
| NM_012200 | B3GAT3 | 256   | 338   | 7.29509014678 |
| NM_012200 | B3GAT3 | 1071  | 1184  | 8.2950903827  |
| NM_012200 | B3GAT3 | 799   | 855   | 7.21095117332 |
| NM_012200 | B3GAT3 | 478   | 638   | 8.61701847759 |
| NM_012200 | B3GAT3 | 859   | 922   | 6.29491663238 |

|           |             |      |      |               |
|-----------|-------------|------|------|---------------|
| NM_024516 | C16orf53    | 246  | 301  | 6.7353427006  |
| NM_024516 | C16orf53    | 804  | 875  | 6.73551644337 |
| NM_024516 | C16orf53    | 1257 | 1379 | 6.73551645092 |
| NM_024511 | HAUS3 430   | 530  |      | 8.23667219607 |
| NM_024511 | HAUS3 1738  | 1794 |      | 8.23265483182 |
| NM_024511 | HAUS3 4277  | 4338 |      | 7.23667243199 |
| NM_024511 | HAUS3 3822  | 3880 |      | 8.23667243199 |
| NM_024511 | HAUS3 1932  | 2077 |      | 8.23667243199 |
| NM_032408 | BAZ1B 4734  | 4796 |      | 4.29051112001 |
| NM_032408 | BAZ1B 4902  | 4955 |      | 4.20637864168 |
| NM_032408 | BAZ1B 5294  | 5341 |      | 6.29051112001 |
| NM_032408 | BAZ1B 2346  | 2436 |      | 4.29051785107 |
| NM_032408 | BAZ1B 920   | 971  |      | 4.29051785085 |
| NM_032408 | BAZ1B 1376  | 1465 |      | 5.29051785107 |
| NM_032408 | BAZ1B 5008  | 5091 |      | 5.87548035157 |
| NM_032408 | BAZ1B 2161  | 2217 |      | 6.61244593841 |
| NM_032408 | BAZ1B 5557  | 5620 |      | 6.29051785085 |
| NM_032408 | BAZ1B 3401  | 3456 |      | 5.29051785085 |
| NM_032408 | BAZ1B 5217  | 5274 |      | 5.29051112001 |
| NM_032408 | BAZ1B 5757  | 5798 |      | 5.28650025089 |
| NM_032408 | BAZ1B 5683  | 5744 |      | 4.28650025089 |
| NM_032408 | BAZ1B 1872  | 2004 |      | 6.61244594596 |
| NM_032408 | BAZ1B 649   | 747  |      | 6.61244594596 |
| NM_032408 | BAZ1B 1122  | 1349 |      | 7.87548035179 |
| NM_032408 | BAZ1B 49    | 101  |      | 4.28650025089 |
| NM_032408 | BAZ1B 4426  | 4532 |      | 5.87548035179 |
| NM_032408 | BAZ1B 767   | 880  |      | 5.29051785107 |
| NM_032408 | BAZ1B 496   | 624  |      | 6.29051785107 |
| NM_032408 | BAZ1B 4078  | 4141 |      | 4.29051785107 |
| NM_032408 | BAZ1B 2579  | 2636 |      | 5.28650025089 |
| NM_032408 | BAZ1B 2778  | 2911 |      | 4.29051785107 |
| NM_032409 | PINK1 1008  | 1076 |      | 8.86961344932 |
| NM_000642 | AGL 3271    | 3312 |      | 8.16088585653 |
| NM_000642 | AGL 2156    | 2225 |      | 6.65604496502 |
| NM_000642 | AGL 3320    | 3352 |      | 6.57592335581 |
| NM_000642 | AGL 3699    | 3768 |      | 7.66005583414 |
| NM_000642 | AGL 2728    | 2787 |      | 6.65604496502 |
| NM_000642 | AGL 4066    | 4127 |      | 6.66005583414 |
| NM_000642 | AGL 7244    | 7338 |      | 6.65988881488 |
| NM_000642 | AGL 753     | 844  |      | 8.24502506569 |
| NM_018179 | ATF7IP 838  | 894  |      | 9.10616360167 |
| NM_018179 | ATF7IP 901  | 964  |      | 7.517183501   |
| NM_018179 | ATF7IP 3091 | 3139 |      | 7.517183501   |
| NM_018179 | ATF7IP 780  | 811  |      | 7.52119437012 |
| NM_018179 | ATF7IP 968  | 1082 |      | 7.52120110117 |
| NM_018179 | ATF7IP 4794 | 4847 |      | 7.517183501   |
| NM_018179 | ATF7IP 4951 | 5047 |      | 7.52120110117 |
| NM_018179 | ATF7IP 2587 | 2682 |      | 9.10615687084 |
| NM_018158 | SLC4A1AP    | 1419 | 1466 | 4.78229368469 |
| NM_018158 | SLC4A1AP    | 1678 | 1722 | 3.77828281557 |



|           |          |      |      |               |
|-----------|----------|------|------|---------------|
| NM_018158 | SLC4A1AP | 1483 | 1543 | 3.77828281557 |
| NM_021934 | C12orf44 | 1096 | 1154 | 6.96630103652 |
| NM_021934 | C12orf44 | 1172 | 1247 | 5.96630103629 |
| NM_021934 | C12orf44 | 248  | 300  | 7.55126353701 |
| NM_021934 | C12orf44 | 622  | 724  | 8.77365595857 |
| NM_021934 | C12orf44 | 1038 | 1087 | 6.88216182713 |
| NM_021934 | C12orf44 | 56   | 95   | 5.9661272862  |
| NM_021934 | C12orf44 | 810  | 870  | 5.96629430546 |
| NM_021932 | RIC8A    | 3132 | 3188 | 9.66867001013 |
| NM_021932 | RIC8A    | 2905 | 2979 | 9.34674167932 |
| NM_021932 | RIC8A    | 3070 | 3126 | 9.93170441596 |
| NM_021932 | RIC8A    | 2439 | 2520 | 8.34674167932 |
| NM_021932 | RIC8A    | 1528 | 1571 | 8.34674167932 |
| NM_021932 | RIC8A    | 1806 | 1880 | 8.93170441596 |
| NM_021932 | RIC8A    | 200  | 268  | 8.34272431507 |
| NM_021932 | RIC8A    | 2093 | 2155 | 7.34656816492 |
| NM_021932 | RIC8A    | 2524 | 2636 | 9.34674191524 |
| NM_021932 | RIC8A    | 2287 | 2373 | 7.34674167932 |
| NM_021932 | RIC8A    | 3373 | 3515 | 7.34674191524 |
| NM_021932 | RIC8A    | 1988 | 2047 | 8.93170441596 |
| NM_021930 | RINT1    | 845  | 928  | 7.30473412223 |
| NM_021930 | RINT1    | 2416 | 2460 | 6.30473412223 |
| NM_021930 | RINT1    | 1300 | 1356 | 6.30490763663 |
| NM_021930 | RINT1    | 1616 | 1693 | 6.304907865   |
| NM_021930 | RINT1    | 1783 | 1914 | 8.30490787255 |
| NM_021930 | RINT1    | 1972 | 2091 | 7.88987036572 |
| NM_018150 | RNF220   | 1532 | 1574 | 6.64974986691 |
| NM_018150 | RNF220   | 2901 | 2972 | 6.14892657535 |
| NM_018150 | RNF220   | 2756 | 2794 | 5.1449089754  |
| NM_018151 | RIF1     | 5984 | 6038 | 4.78186713009 |
| NM_018151 | RIF1     | 1957 | 2028 | 7.10379522498 |
| NM_018151 | RIF1     | 2711 | 2772 | 5.78186712254 |
| NM_018151 | RIF1     | 2850 | 2923 | 5.78186713009 |
| NM_018151 | RIF1     | 6093 | 6166 | 4.78169337977 |
| NM_018151 | RIF1     | 7680 | 7721 | 4.77784952992 |
| NM_018151 | RIF1     | 7142 | 7213 | 5.78186712254 |
| NM_018151 | RIF1     | 6529 | 6581 | 4.77784952992 |
| NM_018151 | RIF1     | 9164 | 9231 | 4.78186713009 |
| NM_018151 | RIF1     | 194  | 286  | 6.36682962326 |
| NM_018151 | RIF1     | 7944 | 7974 | 5.69772792071 |
| NM_018151 | RIF1     | 2346 | 2472 | 7.10379522498 |
| NM_018151 | RIF1     | 496  | 531  | 5.77784952992 |
| NM_018151 | RIF1     | 619  | 682  | 4.77784952992 |
| NM_018151 | RIF1     | 6662 | 6743 | 6.36682963059 |
| NM_018151 | RIF1     | 1292 | 1351 | 6.36682289976 |
| NM_018151 | RIF1     | 1158 | 1261 | 5.78186713009 |
| NM_018151 | RIF1     | 3558 | 3652 | 4.78186712254 |
| NM_018154 | ASF1B    | 1617 | 1681 | 10.5411747196 |
| NM_018154 | ASF1B    | 1152 | 1243 | 11.1261372203 |
| NM_018154 | ASF1B    | 169  | 244  | 11.5411747196 |

|              |          |       |       |               |
|--------------|----------|-------|-------|---------------|
| NM_018154    | ASF1B    | 1058  | 1112  | 10.5410009693 |
| NM_018154    | ASF1B    | 942   | 1057  | 13.1261372203 |
| NM_018154    | ASF1B    | 409   | 505   | 11.8631028145 |
| NM_018154    | ASF1B    | 852   | 920   | 10.5411747196 |
| NM_018154    | ASF1B    | 246   | 375   | 11.8631028145 |
| NM_018156    | VPS13D   | 12132 | 12157 | 8.48285336727 |
| NM_018156    | VPS13D   | 7697  | 7749  | 8.48285336727 |
| NM_018156    | VPS13D   | 8212  | 8304  | 9.48669721712 |
| NM_018156    | VPS13D   | 13542 | 13584 | 8.48686423639 |
| NM_018156    | VPS13D   | 10652 | 10740 | 8.48686423639 |
| NM_018156    | VPS13D   | 10074 | 10169 | 10.4868642364 |
| NM_018156    | VPS13D   | 10387 | 10497 | 10.0718334682 |
| NM_021939    | FKBP10   | 742   | 790   | 5.68820813869 |
| NM_021939    | FKBP10   | 908   | 958   | 5.36628003626 |
| NM_021939    | FKBP10   | 617   | 673   | 4.3662800438  |
| NM_021939    | FKBP10   | 1201  | 1249  | 5.68820813869 |
| NM_021939    | FKBP10   | 2304  | 2373  | 5.36628004381 |
| NM_021939    | FKBP10   | 1259  | 1322  | 4.36226244363 |
| NM_021939    | FKBP10   | 1097  | 1156  | 4.94722494435 |
| NM_021939    | FKBP10   | 1334  | 1571  | 6.95124254453 |
| NM_021939    | FKBP10   | 827   | 904   | 3.36226244363 |
| NM_021939    | FKBP10   | 1939  | 2059  | 4.95124254453 |
| NM_021939    | FKBP10   | 2391  | 2481  | 5.36628004381 |
| NM_021939    | FKBP10   | 513   | 577   | 4.36627331275 |
| NM_001105079 | FBRS     | 2407  | 2454  | 9.21121569781 |
| NM_001105079 | FBRS     | 2507  | 2571  | 10.2071983336 |
| NM_001105079 | FBRS     | 527   | 628   | 9.21121592617 |
| NM_014838    | ZBED4    | 1827  | 1868  | 6.62584689136 |
| NM_014838    | ZBED4    | 1123  | 1179  | 7.70981235042 |
| NM_014838    | ZBED4    | 2032  | 2097  | 7.70596850057 |
| NM_014838    | ZBED4    | 3188  | 3241  | 7.70981235042 |
| NM_014838    | ZBED4    | 3828  | 3897  | 8.70998610052 |
| NM_014838    | ZBED4    | 3543  | 3608  | 6.70596850057 |
| NM_014838    | ZBED4    | 4517  | 4618  | 8.29494836554 |
| NM_014838    | ZBED4    | 1346  | 1426  | 9.03191418808 |
| NM_014838    | ZBED4    | 2486  | 2605  | 7.70998610074 |
| NM_014838    | ZBED4    | 387   | 425   | 6.70596850057 |
| NM_014838    | ZBED4    | 227   | 303   | 6.70596850057 |
| NM_014838    | ZBED4    | 1598  | 1714  | 8.70998610074 |
| NM_014838    | ZBED4    | 439   | 570   | 7.70998610074 |
| NM_014832    | TBC1D4   | 1220  | 1265  | 5.55777615242 |
| NM_014832    | TBC1D4   | 1694  | 1750  | 4.55777615242 |
| NM_014342    | MTCH2    | 184   | 244   | 6.68873538855 |
| NM_014342    | MTCH2    | 390   | 458   | 7.27369788927 |
| NM_014342    | MTCH2    | 250   | 369   | 7.27369788927 |
| NM_014342    | MTCH2    | 843   | 1036  | 9.08105281133 |
| NM_014342    | MTCH2    | 1044  | 1170  | 6.68873538855 |
| NM_014342    | MTCH2    | 543   | 842   | 9.7761982298  |
| NM_014345    | ZNF318   | 6743  | 6782  | 6.29713974608 |
| NM_014834    | LRRRC37A | 4315  | 4359  | 9.07742555862 |

|              |          |       |       |               |               |
|--------------|----------|-------|-------|---------------|---------------|
| NM_014834    | LRRC37A  | 3012  | 3059  | 9.07358170877 |               |
| NM_005324    | H3F3B    | 1281  | 1366  | 3.50395782245 |               |
| NM_005324    | H3F3B    | 746   | 814   | 2.50395758654 |               |
| NM_005324    | H3F3B    | 900   | 963   | 3.50395782245 |               |
| NM_005324    | H3F3B    | 488   | 539   | 3.50395781491 |               |
| NM_005324    | H3F3B    | 339   | 395   | 4.08892032295 |               |
| NM_005324    | H3F3B    | 862   | 897   | 4.08874657286 |               |
| NM_005324    | H3F3B    | 1137  | 1203  | 4.50378407214 |               |
| NM_005324    | H3F3B    | 257   | 334   | 3.50395782245 |               |
| NM_005324    | H3F3B    | 12    | 153   | 5.96338944109 |               |
| NM_005324    | H3F3B    | 540   | 713   | 6.50395782245 |               |
| NM_005324    | H3F3B    | 421   | 471   | 3.50378407214 |               |
| NM_005324    | H3F3B    | 1500  | 1608  | 4.08892032318 |               |
| NM_005327    | HADH     | 974   | 1047  | 4.65232829947 |               |
| NM_005327    | HADH     | 894   | 959   | 4.65232829947 |               |
| NM_005327    | HADH     | 480   | 526   | 3.56818909009 |               |
| NM_005327    | HADH     | 551   | 646   | 5.65232829947 |               |
| NM_005326    | HAGH     | 508   | 589   | 5.33830918838 |               |
| NM_005326    | HAGH     | 983   | 1047  | 5.33830918838 |               |
| NM_005321    | HIST1H1E |       | 148   | 232           | 11.7277711891 |
| NM_005321    | HIST1H1E |       | 243   | 296           | 10.1428086883 |
| NM_005321    | HIST1H1E |       | 4     | 132           | 13.4647367832 |
| NM_177556    | TR0      | 1995  | 2046  | 6.84666969358 |               |
| NM_003371    | VAV2     | 1220  | 1291  | 4.44196174308 |               |
| NM_003371    | VAV2     | 350   | 424   | 5.43811789322 |               |
| NM_003371    | VAV2     | 2606  | 2638  | 4.35799628401 |               |
| NM_003371    | VAV2     | 257   | 349   | 5.4421354934  |               |
| NM_003371    | VAV2     | 167   | 242   | 4.44213549317 |               |
| NM_003371    | VAV2     | 574   | 725   | 6.02709798657 |               |
| NM_002613    | PDPK1    | 4915  | 4977  | 5.34066787486 |               |
| NM_002613    | PDPK1    | 7048  | 7090  | 5.34049436046 |               |
| NM_002613    | PDPK1    | 6429  | 6476  | 5.25652890139 |               |
| NM_002613    | PDPK1    | 4574  | 4667  | 5.34066137972 |               |
| NM_002613    | PDPK1    | 2202  | 2246  | 4.34049436046 |               |
| NM_002613    | PDPK1    | 292   | 323   | 4.25652890139 |               |
| NM_002613    | PDPK1    | 4813  | 4859  | 4.3366505106  |               |
| NM_002613    | PDPK1    | 206   | 260   | 4.25652890139 |               |
| NM_002613    | PDPK1    | 3783  | 3826  | 4.25652890139 |               |
| NM_002613    | PDPK1    | 7106  | 7187  | 5.34066810323 |               |
| NM_002613    | PDPK1    | 6144  | 6198  | 5.3366505106  |               |
| NM_002613    | PDPK1    | 5039  | 5138  | 6.34066811078 |               |
| NM_002613    | PDPK1    | 915   | 990   | 4.3366505106  |               |
| NM_002613    | PDPK1    | 1622  | 1738  | 5.3366505106  |               |
| NM_002613    | PDPK1    | 1385  | 1443  | 5.34049436046 |               |
| NM_003372    | VBP1     | 131   | 219   | 3.66862750194 |               |
| NM_003372    | VBP1     | 459   | 546   | 5.25359673372 |               |
| NM_003372    | VBP1     | 419   | 458   | 3.58449502361 |               |
| NM_001009944 | PKD1     | 356   | 392   | 6.16418301854 |               |
| NM_001009944 | PKD1     | 1159  | 1215  | 6.16418301854 |               |
| NM_001009944 | PKD1     | 10280 | 10340 | 6.16820061116 |               |

|              |      |       |       |               |
|--------------|------|-------|-------|---------------|
| NM_001009944 | PKD1 | 1934  | 1976  | 7.16820061849 |
| NM_001009944 | PKD1 | 8837  | 8890  | 6.16418301854 |
| NM_001009944 | PKD1 | 7940  | 7994  | 7.16820061871 |
| NM_001009944 | PKD1 | 7442  | 7476  | 6.08406140932 |
| NM_001009944 | PKD1 | 13522 | 13577 | 7.16820061871 |
| NM_001009944 | PKD1 | 8104  | 8189  | 6.16820061871 |
| NM_001009944 | PKD1 | 10203 | 10274 | 7.16820061116 |
| NM_001009944 | PKD1 | 9424  | 9482  | 8.16820061871 |
| NM_001009944 | PKD1 | 714   | 789   | 7.16820061871 |
| NM_001009944 | PKD1 | 10382 | 10438 | 9.16820061871 |
| NM_001009944 | PKD1 | 2159  | 2197  | 8.16820061871 |
| NM_001009944 | PKD1 | 10089 | 10140 | 6.16819388766 |
| NM_001009944 | PKD1 | 7850  | 7919  | 6.16820038279 |
| NM_001009944 | PKD1 | 1587  | 1648  | 7.75316311943 |
| NM_001009944 | PKD1 | 5023  | 5066  | 6.16820061116 |
| NM_001009944 | PKD1 | 1728  | 1788  | 6.16418301854 |
| NM_001009944 | PKD1 | 8660  | 8757  | 8.4901287136  |
| NM_001009944 | PKD1 | 2290  | 2381  | 6.16820061871 |
| NM_001009944 | PKD1 | 3072  | 3172  | 7.16820061871 |
| NM_001009944 | PKD1 | 8018  | 8095  | 6.16820038279 |
| NM_001009944 | PKD1 | 9930  | 10051 | 8.9755554077  |
| NM_001009944 | PKD1 | 1274  | 1348  | 6.16418301854 |
| NM_001009944 | PKD1 | 9734  | 9879  | 7.75316311943 |
| NM_001009944 | PKD1 | 2049  | 2158  | 6.16820061871 |
| NM_001009944 | PKD1 | 7333  | 7388  | 6.16802686839 |
| NM_001009944 | PKD1 | 7277  | 7328  | 6.16819388766 |
| NM_001009944 | PKD1 | 402   | 628   | 10.25566346   |
| NM_001009944 | PKD1 | 2595  | 2723  | 6.16820061871 |
| NM_001009944 | PKD1 | 7478  | 7599  | 7.16820061871 |
| NM_001009944 | PKD1 | 3325  | 3407  | 7.16820038279 |
| NM_003373    | VCL  | 3765  | 3826  | 7.54478597316 |
| NM_003373    | VCL  | 236   | 320   | 7.86671406805 |
| NM_003373    | VCL  | 4530  | 4602  | 6.54477924211 |
| NM_003373    | VCL  | 1487  | 1602  | 6.54478597316 |
| NM_003373    | VCL  | 419   | 479   | 5.46064676378 |
| NM_003373    | VCL  | 3001  | 3088  | 6.54477924211 |
| NM_003373    | VCL  | 3722  | 3765  | 5.54478573724 |
| NM_003373    | VCL  | 3913  | 3972  | 6.54478596561 |
| NM_003373    | VCL  | 3123  | 3164  | 6.54478596561 |
| NM_003373    | VCL  | 1148  | 1185  | 7.54478596561 |
| NM_003373    | VCL  | 4689  | 4772  | 6.54478573724 |
| NM_003373    | VCL  | 991   | 1118  | 8.86671406805 |
| NM_003373    | VCL  | 3838  | 3885  | 5.46064676378 |
| NM_003373    | VCL  | 3972  | 4033  | 6.54076837299 |
| NM_003373    | VCL  | 764   | 804   | 5.46064676378 |
| NM_003373    | VCL  | 370   | 416   | 7.12974847366 |
| NM_003373    | VCL  | 3562  | 3684  | 7.86671406805 |
| NM_003373    | VCL  | 4286  | 4396  | 6.54478597316 |
| NM_003373    | VCL  | 2597  | 2688  | 7.12974847388 |
| NM_003373    | VCL  | 103   | 184   | 7.54478597315 |

|           |       |      |      |               |
|-----------|-------|------|------|---------------|
| NM_003373 | VCL   | 3437 | 3547 | 7.12974847388 |
| NM_003373 | VCL   | 4054 | 4100 | 6.54478573724 |
| NM_003373 | VCL   | 2343 | 2597 | 9.54478597316 |
| NM_003373 | VCL   | 496  | 677  | 9.0042175918  |
| NM_003373 | VCL   | 2085 | 2323 | 9.54478597316 |
| NM_003373 | VCL   | 6    | 91   | 6.54478597316 |
| NM_003373 | VCL   | 1277 | 1422 | 7.86671406805 |
| NM_003373 | VCL   | 3197 | 3341 | 7.86671406805 |
| NM_003373 | VCL   | 825  | 954  | 7.86671406805 |
| NM_003373 | VCL   | 1961 | 2059 | 7.12974847388 |
| NM_003373 | VCL   | 4773 | 4867 | 5.54478596561 |
| NM_003373 | VCL   | 1704 | 1788 | 6.54478597315 |
| NM_003373 | VCL   | 1833 | 1934 | 7.54478597316 |
| NM_003373 | VCL   | 1188 | 1277 | 7.54478597316 |
| NM_003373 | VCL   | 4416 | 4525 | 6.54478597316 |
| NM_012164 | FBXW2 | 2229 | 2267 | 5.86300461576 |
| NM_012164 | FBXW2 | 921  | 987  | 7.86317836607 |
| NM_012164 | FBXW2 | 699  | 760  | 6.86317813015 |
| NM_012164 | FBXW2 | 1492 | 1558 | 6.86317836607 |
| NM_012164 | FBXW2 | 1252 | 1299 | 5.8591607659  |
| NM_012164 | FBXW2 | 1347 | 1431 | 6.86317813015 |
| NM_012164 | FBXW2 | 433  | 558  | 8.67053328813 |
| NM_012164 | FBXW2 | 1594 | 1707 | 6.86317836585 |
| NM_012164 | FBXW2 | 231  | 346  | 8.18510646096 |
| NM_012168 | FBX02 | 1294 | 1344 | 4.91930668139 |
| NM_012168 | FBX02 | 1534 | 1637 | 6.58840839149 |
| NM_012168 | FBX02 | 1020 | 1198 | 7.00344589077 |
| NM_012168 | FBX02 | 867  | 983  | 6.00344589077 |
| NM_012168 | FBX02 | 1353 | 1397 | 6.00344589077 |
| NM_006256 | PKN2  | 470  | 561  | 5.24643221241 |
| NM_006256 | PKN2  | 2435 | 2497 | 5.82737711296 |
| NM_006256 | PKN2  | 1647 | 1699 | 5.83139471313 |
| NM_006256 | PKN2  | 2097 | 2158 | 4.16229300303 |
| NM_006256 | PKN2  | 2303 | 2365 | 4.2462584621  |
| NM_006256 | PKN2  | 1492 | 1542 | 5.2464319765  |
| NM_006256 | PKN2  | 3148 | 3198 | 5.24241461224 |
| NM_006256 | PKN2  | 4013 | 4084 | 5.24642548136 |
| NM_006256 | PKN2  | 2550 | 2620 | 5.24241461224 |
| NM_006256 | PKN2  | 2622 | 2777 | 6.24643221241 |
| NM_006256 | PKN2  | 5450 | 5540 | 4.24643221241 |
| NM_201224 | DDX47 | 1409 | 1506 | 8.28717837021 |
| NM_201224 | DDX47 | 951  | 1023 | 7.70221586949 |
| NM_201224 | DDX47 | 156  | 237  | 5.70221586949 |
| NM_201224 | DDX47 | 372  | 440  | 8.50957079155 |
| NM_201224 | DDX47 | 297  | 352  | 5.69819826932 |
| NM_201224 | DDX47 | 488  | 597  | 8.87214087094 |
| NM_201224 | DDX47 | 440  | 487  | 8.02012636421 |
| NM_201224 | DDX47 | 627  | 727  | 7.28717837021 |
| NM_201224 | DDX47 | 1311 | 1361 | 6.70221586927 |
| NM_201224 | DDX47 | 1242 | 1293 | 6.69819826932 |

|              |       |      |      |               |
|--------------|-------|------|------|---------------|
| NM_201224    | DDX47 | 1532 | 1568 | 6.69819826932 |
| NM_201224    | DDX47 | 99   | 154  | 7.28717837021 |
| NM_003377    | VEGFB | 1159 | 1237 | 8.06176237881 |
| NM_003377    | VEGFB | 412  | 519  | 9.64672488708 |
| NM_003377    | VEGFB | 222  | 294  | 7.05774478619 |
| NM_001033930 | UBA52 | 2193 | 2275 | 2.67903869518 |
| NM_001033930 | UBA52 | 68   | 148  | 5.48639361723 |
| NM_001033930 | UBA52 | 192  | 320  | 5.2640011959  |
| NM_001033930 | UBA52 | 375  | 465  | 5.84896369662 |
| NM_001033930 | UBA52 | 667  | 715  | 4.17986198651 |
| NM_001033930 | UBA52 | 754  | 835  | 3.59489948579 |
| NM_004747    | DLG5  | 1781 | 1823 | 5.96987659348 |
| NM_004747    | DLG5  | 4705 | 4783 | 7.05401580287 |
| NM_004747    | DLG5  | 2919 | 2974 | 5.05384205255 |
| NM_004747    | DLG5  | 6179 | 6265 | 5.05401580287 |
| NM_004747    | DLG5  | 5021 | 5078 | 6.63897830358 |
| NM_004747    | DLG5  | 6627 | 6697 | 5.05401556695 |
| NM_004747    | DLG5  | 2230 | 2296 | 6.05401580287 |
| NM_004747    | DLG5  | 3572 | 3705 | 6.05401580287 |
| NM_004747    | DLG5  | 2853 | 2913 | 5.04999820269 |
| NM_004747    | DLG5  | 614  | 662  | 6.63897806767 |
| NM_004747    | DLG5  | 520  | 562  | 4.96987659348 |
| NM_004747    | DLG5  | 7104 | 7156 | 5.05401580287 |
| NM_004747    | DLG5  | 6266 | 6322 | 5.05401580287 |
| NM_004747    | DLG5  | 3903 | 3944 | 6.63880455327 |
| NM_004747    | DLG5  | 4452 | 4502 | 6.05384205255 |
| NM_004747    | DLG5  | 1502 | 1545 | 6.63897830359 |
| NM_004747    | DLG5  | 2762 | 2812 | 6.63897830359 |
| NM_004747    | DLG5  | 1642 | 1760 | 6.05401580287 |
| NM_004747    | DLG5  | 4850 | 4937 | 5.05401580287 |
| NM_004747    | DLG5  | 2989 | 3127 | 5.05401580287 |
| NM_004747    | DLG5  | 5261 | 5364 | 7.86137072492 |
| NM_004747    | DLG5  | 125  | 174  | 4.96987659348 |
| NM_004747    | DLG5  | 1363 | 1471 | 7.05401580286 |
| NM_004747    | DLG5  | 3956 | 4014 | 7.05401580286 |
| NM_004747    | DLG5  | 4608 | 4672 | 5.04999820269 |
| NM_004747    | DLG5  | 1056 | 1134 | 5.05401580286 |
| NM_004747    | DLG5  | 5150 | 5261 | 6.63897830359 |
| NM_004747    | DLG5  | 1187 | 1305 | 7.86137072492 |
| NM_004747    | DLG5  | 2340 | 2532 | 8.05401580287 |
| NM_004747    | DLG5  | 769  | 838  | 7.05401580287 |
| NM_004747    | DLG5  | 6401 | 6605 | 7.63897830359 |
| NM_004747    | DLG5  | 6325 | 6389 | 6.05401556695 |
| NM_004747    | DLG5  | 7236 | 7429 | 6.63897830359 |
| NM_004747    | DLG5  | 5780 | 5889 | 7.37594389775 |
| NM_004747    | DLG5  | 5395 | 5537 | 6.63897830359 |
| NM_004747    | DLG5  | 2541 | 2660 | 6.63897830359 |
| NM_004747    | DLG5  | 1893 | 2155 | 8.86137072492 |
| NM_004747    | DLG5  | 3394 | 3529 | 7.37594389775 |
| NM_004747    | DLG5  | 6822 | 7098 | 8.63897830359 |

|           |         |      |      |               |
|-----------|---------|------|------|---------------|
| NM_004741 | NOLC1   | 539  | 590  | 5.72440384119 |
| NM_004741 | NOLC1   | 3606 | 3672 | 4.72457759151 |
| NM_004741 | NOLC1   | 1599 | 1689 | 4.72457758396 |
| NM_004741 | NOLC1   | 3828 | 3881 | 4.72457759128 |
| NM_004741 | NOLC1   | 2727 | 2797 | 3.72440384119 |
| NM_004741 | NOLC1   | 370  | 409  | 5.30953336117 |
| NM_004741 | NOLC1   | 1124 | 1161 | 3.64043838212 |
| NM_004741 | NOLC1   | 2886 | 2927 | 5.22540088284 |
| NM_004741 | NOLC1   | 225  | 323  | 6.04650568639 |
| NM_004741 | NOLC1   | 3720 | 3803 | 5.30953985631 |
| NM_004741 | NOLC1   | 1183 | 1236 | 4.72055999133 |
| NM_004741 | NOLC1   | 1244 | 1357 | 5.72457759151 |
| NM_004741 | NOLC1   | 2126 | 2213 | 4.72457759151 |
| NM_004741 | NOLC1   | 2568 | 2648 | 5.30953985631 |
| NM_004741 | NOLC1   | 2945 | 3035 | 3.72457759128 |
| NM_004741 | NOLC1   | 3454 | 3563 | 5.72457759151 |
| NM_004741 | NOLC1   | 2477 | 2564 | 5.30954009223 |
| NM_001046 | SLC12A2 | 3648 | 3794 | 12.5602981462 |
| NM_001046 | SLC12A2 | 6499 | 6568 | 9.39037314477 |
| NM_001046 | SLC12A2 | 5833 | 5903 | 9.97533564549 |
| NM_001046 | SLC12A2 | 5750 | 5821 | 9.97533564548 |
| NM_001046 | SLC12A2 | 5473 | 5560 | 10.3903731448 |
| NM_001046 | SLC12A2 | 6210 | 6266 | 10.7123012397 |
| NM_001046 | SLC12A2 | 5001 | 5056 | 9.39036641372 |
| NM_001046 | SLC12A2 | 3473 | 3646 | 12.5602981462 |
| NM_001046 | SLC12A2 | 4195 | 4370 | 12.3903731448 |
| NM_001046 | SLC12A2 | 4470 | 4514 | 8.3863555446  |
| NM_001046 | SLC12A2 | 4555 | 4657 | 10.7123012397 |
| NM_001046 | SLC12A2 | 51   | 162  | 11.7123012397 |
| NM_001046 | SLC12A2 | 5287 | 5443 | 9.39037314477 |
| NM_001046 | SLC12A2 | 4076 | 4150 | 11.1977280668 |
| NM_001046 | SLC12A2 | 2254 | 2671 | 14.8661065757 |
| NM_001046 | SLC12A2 | 6599 | 6787 | 13.1452606469 |
| NM_001046 | SLC12A2 | 6131 | 6196 | 10.3903731448 |
| NM_001046 | SLC12A2 | 4662 | 4775 | 10.3903731448 |
| NM_001046 | SLC12A2 | 1364 | 2230 | 15.9602287531 |
| NM_001046 | SLC12A2 | 5951 | 6080 | 12.0908128629 |
| NM_001046 | SLC12A2 | 5636 | 5740 | 10.7123012397 |
| NM_001046 | SLC12A2 | 217  | 309  | 8.39037314477 |
| NM_001046 | SLC12A2 | 2676 | 3453 | 15.5801977036 |
| NM_001046 | SLC12A2 | 4784 | 4933 | 9.97533564549 |
| NM_001046 | SLC12A2 | 569  | 752  | 11.8498047634 |
| NM_001046 | SLC12A2 | 755  | 1362 | 15.0342293345 |
| NM_001046 | SLC12A2 | 3794 | 4068 | 13.8166378995 |
| NM_001047 | SRD5A1  | 853  | 894  | 8.79517345051 |
| NM_001047 | SRD5A1  | 766  | 820  | 9.79918431962 |
| NM_001047 | SRD5A1  | 1751 | 1893 | 10.3841535514 |
| NM_001047 | SRD5A1  | 1972 | 2077 | 8.79919104313 |
| NM_001518 | GTF2I   | 3619 | 3663 | 4.24575869031 |
| NM_001518 | GTF2I   | 2956 | 3027 | 2.92383058787 |

|           |           |      |      |                   |
|-----------|-----------|------|------|-------------------|
| NM_001518 | GTF2I     | 4166 | 4232 | 3.92383059542     |
| NM_001518 | GTF2I     | 2619 | 2697 | 4.73118551748     |
| NM_001518 | GTF2I     | 544  | 629  | 4.92383059542     |
| NM_001518 | GTF2I     | 4027 | 4078 | 1.92383059542     |
| NM_001518 | GTF2I     | 1232 | 1282 | 3.92383059542     |
| NM_001518 | GTF2I     | 2263 | 2323 | 1.9236568451      |
| NM_001518 | GTF2I     | 4256 | 4309 | 3.92383059542     |
| NM_001518 | GTF2I     | 2783 | 2956 | 6.24575869031     |
| NM_001518 | GTF2I     | 2135 | 2260 | 5.38326221406     |
| NM_001518 | GTF2I     | 1676 | 1827 | 5.92383059542     |
| NM_001518 | GTF2I     | 433  | 534  | 4.50879309614     |
| NM_001518 | GTF2I     | 822  | 876  | 1.92383058787     |
| NM_001518 | GTF2I     | 4098 | 4155 | 1.92383059541     |
| NM_001518 | GTF2I     | 681  | 785  | 5.50879309614     |
| NM_001518 | GTF2I     | 3045 | 3379 | 7.01129343667     |
| NM_001518 | GTF2I     | 2367 | 2592 | 6.09375559686     |
| NM_001518 | GTF2I     | 132  | 295  | 3.50879309614     |
| NM_001518 | GTF2I     | 881  | 1162 | 6.17175810886     |
| NM_001518 | GTF2I     | 4312 | 4432 | 4.73118551748     |
| NM_001518 | GTF2I     | 1301 | 1666 | 7.24575869031     |
| NM_001518 | GTF2I     | 1836 | 2131 | 6.96822471478     |
| NM_001518 | GTF2I     | 3419 | 3613 | 6.09375559686     |
| NM_001518 | GTF2I     | 3716 | 4018 | 6.44739255148     |
| NM_004039 | ANXA2     | 0    | 225  | 5.89755316636     |
| NM_004039 | ANXA2     | 738  | 1113 | 6.77202228428     |
| NM_004039 | ANXA2     | 1211 | 1361 | 5.40005350689     |
| NM_004039 | ANXA2     | 227  | 734  | 7.56051817908     |
| NM_152640 | DCP1B     | 1308 | 1361 | 8.13607032428     |
| NM_152640 | DCP1B     | 18   | 38   | 6.05193112245     |
| NM_004749 | TBRG4     | 105  | 172  | 4.9278883296      |
| NM_004749 | TBRG4     | 1245 | 1323 | 6.9278883296      |
| NM_004749 | TBRG4     | 196  | 309  | 8.09781333104     |
| NM_004749 | TBRG4     | 820  | 918  | 7.73524325165     |
| NM_004749 | TBRG4     | 1007 | 1082 | 7.9278883296      |
| NM_004749 | TBRG4     | 430  | 502  | 6.51285083032     |
| NM_004749 | TBRG4     | 1382 | 1410 | 4.92771457928     |
| NM_004749 | TBRG4     | 781  | 820  | 4.92387072942     |
| NM_004749 | TBRG4     | 505  | 632  | 6.51285083032     |
| NM_004749 | TBRG4     | 1703 | 1804 | 7.51285083032     |
| NM_004749 | TBRG4     | 1880 | 2120 | 8.24981642448     |
| NM_017924 | C14orf119 |      | 624  | 713 4.49977322204 |
| NM_017924 | C14orf119 |      | 519  | 621 4.82170131693 |
| NM_022356 | LEPRE1    | 1487 | 1594 | 7.21607934565     |
| NM_022356 | LEPRE1    | 1057 | 1121 | 6.80104184637     |
| NM_022356 | LEPRE1    | 553  | 605  | 5.13194013626     |
| NM_022356 | LEPRE1    | 72   | 144  | 6.21607910973     |
| NM_022356 | LEPRE1    | 1640 | 1673 | 6.21206174547     |
| NM_022356 | LEPRE1    | 1830 | 1911 | 5.21607934542     |
| NM_022356 | LEPRE1    | 1960 | 2033 | 7.21607934564     |
| NM_022356 | LEPRE1    | 1725 | 1757 | 6.2160793381      |



|              |        |      |      |               |
|--------------|--------|------|------|---------------|
| NM_022356    | LEPRE1 | 860  | 909  | 5.21206174547 |
| NM_022356    | LEPRE1 | 2414 | 2462 | 5.21607261459 |
| NM_022356    | LEPRE1 | 2294 | 2394 | 6.80104184637 |
| NM_022356    | LEPRE1 | 2468 | 2503 | 5.13194013626 |
| NM_022356    | LEPRE1 | 917  | 1017 | 7.21607934565 |
| NM_022356    | LEPRE1 | 608  | 775  | 9.38600434709 |
| NM_022356    | LEPRE1 | 1772 | 1819 | 6.13194013626 |
| NM_022356    | LEPRE1 | 1143 | 1468 | 8.67551096428 |
| NM_016086    | STYXL1 | 859  | 909  | 8.06774484517 |
| NM_016086    | STYXL1 | 704  | 795  | 8.07175571429 |
| NM_016086    | STYXL1 | 514  | 640  | 10.0717624453 |
| NM_016080    | GLOD4  | 1277 | 1356 | 5.86538566654 |
| NM_016080    | GLOD4  | 1402 | 1456 | 4.86538565899 |
| NM_016080    | GLOD4  | 1196 | 1266 | 4.86521191622 |
| NM_016080    | GLOD4  | 221  | 292  | 4.86538566653 |
| NM_016080    | GLOD4  | 1514 | 1595 | 4.28042316582 |
| NM_016080    | GLOD4  | 821  | 951  | 5.28042316582 |
| NM_016080    | GLOD4  | 143  | 197  | 3.28042316559 |
| NM_016080    | GLOD4  | 997  | 1072 | 4.86538566654 |
| NM_016080    | GLOD4  | 446  | 552  | 4.86538566654 |
| NM_016080    | GLOD4  | 1081 | 1179 | 4.28042316582 |
| NM_016080    | GLOD4  | 710  | 784  | 4.27640556564 |
| NM_201599    | ZMYM3  | 4130 | 4187 | 5.47832758723 |
| NM_201599    | ZMYM3  | 3128 | 3220 | 6.48234518718 |
| NM_201599    | ZMYM3  | 3644 | 3715 | 7.06730768813 |
| NM_201599    | ZMYM3  | 2247 | 2302 | 7.06329008795 |
| NM_201599    | ZMYM3  | 3013 | 3100 | 7.48234518718 |
| NM_201599    | ZMYM3  | 3824 | 3892 | 6.48234518741 |
| NM_201599    | ZMYM3  | 2891 | 2941 | 6.48234495149 |
| NM_201599    | ZMYM3  | 4399 | 4495 | 7.06730745221 |
| NM_201599    | ZMYM3  | 4582 | 4684 | 7.48234517986 |
| NM_201599    | ZMYM3  | 345  | 410  | 7.06730095707 |
| NM_201599    | ZMYM3  | 1218 | 1303 | 5.48234518741 |
| NM_201599    | ZMYM3  | 4952 | 5070 | 6.48234518741 |
| NM_001164803 | RBMX   | 553  | 606  | 4.08600451609 |
| NM_001164803 | RBMX   | 1182 | 1213 | 3.00186554262 |
| NM_001164803 | RBMX   | 1689 | 1754 | 4.08198715183 |
| NM_001164803 | RBMX   | 84   | 195  | 5.40793284689 |
| NM_001164803 | RBMX   | 655  | 751  | 5.40793284689 |
| NM_001164803 | RBMX   | 1777 | 2050 | 5.67096725273 |
| NM_001164803 | RBMX   | 215  | 420  | 6.08600475201 |
| NM_001164803 | RBMX   | 1420 | 1557 | 5.40793284689 |
| NM_006895    | HNMT   | 1043 | 1078 | 2.36513330686 |
| NM_006895    | HNMT   | 345  | 424  | 3.44927251602 |
| NM_006895    | HNMT   | 773  | 824  | 2.44525491607 |
| NM_006895    | HNMT   | 563  | 600  | 2.36513330686 |
| NM_006895    | HNMT   | 923  | 998  | 4.03423501697 |
| NM_001414    | EIF2B1 | 249  | 371  | 6.81209703488 |
| NM_001414    | EIF2B1 | 378  | 438  | 6.81192328456 |
| NM_001414    | EIF2B1 | 916  | 1047 | 6.81209703488 |

|              |          |      |      |                    |
|--------------|----------|------|------|--------------------|
| NM_001414    | EIF2B1   | 539  | 600  | 6.22311693398      |
| NM_001414    | EIF2B1   | 777  | 874  | 8.03448945621      |
| NM_001414    | EIF2B1   | 1214 | 1291 | 5.22713452661      |
| NM_006899    | IDH3B    | 299  | 345  | 4.85701590887      |
| NM_006899    | IDH3B    | 822  | 920  | 5.44599600976      |
| NM_006899    | IDH3B    | 695  | 796  | 6.6683884311       |
| NM_006899    | IDH3B    | 1329 | 1450 | 5.86103350904      |
| NM_006899    | IDH3B    | 405  | 560  | 6.6683884311       |
| NM_006899    | IDH3B    | 1057 | 1195 | 5.86103350904      |
| NM_001142569 | C1orf106 |      | 3903 | 3971 10.2771841289 |
| NM_001142569 | C1orf106 |      | 2271 | 2311 10.2770171096 |
| NM_001142569 | C1orf106 |      | 3591 | 3650 11.2770171096 |
| NM_001142569 | C1orf106 |      | 4081 | 4174 11.2771908599 |
| NM_004427    | PHC2     | 2104 | 2151 | 6.78853940163      |
| NM_004427    | PHC2     | 1989 | 2040 | 6.78871315173      |
| NM_004427    | PHC2     | 745  | 787  | 5.19973305106      |
| NM_004427    | PHC2     | 662  | 709  | 6.78871291603      |
| NM_004427    | PHC2     | 416  | 493  | 6.7887064209       |
| NM_004427    | PHC2     | 350  | 386  | 5.11961144185      |
| NM_004427    | PHC2     | 1890 | 1941 | 7.78871315195      |
| NM_004427    | PHC2     | 1741 | 1805 | 7.20375065123      |
| NM_004427    | PHC2     | 2400 | 2472 | 6.19973305106      |
| NM_004427    | PHC2     | 2262 | 2340 | 6.20375065122      |
| NM_004427    | PHC2     | 1217 | 1290 | 5.19973305106      |
| NM_004427    | PHC2     | 1525 | 1705 | 7.20375065123      |
| NM_001146020 | TJAP1    | 1583 | 1630 | 5.85937589569      |
| NM_001146020 | TJAP1    | 634  | 698  | 4.94350837402      |
| NM_001146020 | TJAP1    | 1187 | 1239 | 4.93949750491      |
| NM_001031855 | LONRF3   | 1868 | 1939 | 10.3240499924      |
| NM_004421    | DVL1     | 2770 | 2844 | 7.64595874844      |
| NM_004421    | DVL1     | 255  | 326  | 6.06098951666      |
| NM_004421    | DVL1     | 614  | 652  | 5.05697864754      |
| NM_004421    | DVL1     | 944  | 1015 | 7.64595874844      |
| NM_004421    | DVL1     | 2338 | 2391 | 5.0609960118       |
| NM_004421    | DVL1     | 2500 | 2567 | 6.64194114827      |
| NM_004421    | DVL1     | 1739 | 1807 | 6.0609960118       |
| NM_004421    | DVL1     | 1235 | 1272 | 5.05697864754      |
| NM_004421    | DVL1     | 1401 | 1557 | 8.06099624772      |
| NM_004421    | DVL1     | 761  | 929  | 7.06099624772      |
| NM_032982    | CASP2    | 661  | 735  | 10.092832393       |
| NM_032982    | CASP2    | 1749 | 1813 | 9.50385229229      |
| NM_032982    | CASP2    | 3601 | 3672 | 8.50385229229      |
| NM_032982    | CASP2    | 1036 | 1087 | 10.5078696565      |
| NM_032982    | CASP2    | 2359 | 2420 | 10.0926586429      |
| NM_032982    | CASP2    | 2949 | 2986 | 8.50786989246      |
| NM_032982    | CASP2    | 1522 | 1596 | 8.50786316141      |
| NM_032982    | CASP2    | 3229 | 3287 | 9.50786989246      |
| NM_032982    | CASP2    | 846  | 907  | 10.5078631614      |
| NM_032982    | CASP2    | 2538 | 2592 | 8.42373068308      |
| NM_032982    | CASP2    | 3321 | 3422 | 10.5078696565      |

|              |        |      |      |               |
|--------------|--------|------|------|---------------|
| NM_016263    | FZR1   | 1634 | 1682 | 6.24908001072 |
| NM_016263    | FZR1   | 3014 | 3070 | 8.57117512487 |
| NM_016263    | FZR1   | 212  | 313  | 7.24925376103 |
| NM_001198869 | CAPN1  | 1528 | 1593 | 7.6657072106  |
| NM_001198869 | CAPN1  | 2884 | 2940 | 7.18028038343 |
| NM_001198869 | CAPN1  | 266  | 327  | 7.18028038343 |
| NM_001198869 | CAPN1  | 676  | 746  | 6.85835228854 |
| NM_001198869 | CAPN1  | 2651 | 2696 | 4.85817853822 |
| NM_001198869 | CAPN1  | 1939 | 2298 | 9.44331478926 |
| NM_001198869 | CAPN1  | 2459 | 2519 | 4.85834555749 |
| NM_001198869 | CAPN1  | 1019 | 1199 | 7.6657072106  |
| NM_001198869 | CAPN1  | 1795 | 1913 | 7.6657072106  |
| NM_001198869 | CAPN1  | 905  | 1002 | 5.85835228854 |
| NM_001198869 | CAPN1  | 1441 | 1520 | 6.44331478171 |
| NM_001198869 | CAPN1  | 507  | 670  | 6.44331478926 |
| NM_001198869 | CAPN1  | 1352 | 1430 | 6.44331478926 |
| NM_001198869 | CAPN1  | 1667 | 1766 | 6.85835228854 |
| NM_198189    | COPS8  | 2044 | 2088 | 4.20612981135 |
| NM_198189    | COPS8  | 986  | 1059 | 4.20612981135 |
| NM_006567    | FARS2  | 1771 | 1821 | 8.91954301343 |
| NM_030581    | WDR59  | 2307 | 2364 | 6.20635365281 |
| NM_030581    | WDR59  | 417  | 488  | 5.62138465696 |
| NM_030581    | WDR59  | 3415 | 3571 | 7.20635388873 |
| NM_030583    | MATN2  | 2125 | 2169 | 12.1524286613 |
| NM_030583    | MATN2  | 1802 | 1906 | 14.2365611396 |
| NM_001161346 | CHFR   | 861  | 936  | 7.14094940698 |
| NM_001161346 | CHFR   | 2160 | 2192 | 6.05681020514 |
| NM_001161346 | CHFR   | 1633 | 1696 | 6.1409494143  |
| NM_001161346 | CHFR   | 238  | 278  | 6.13693181435 |
| NM_001161346 | CHFR   | 1835 | 1878 | 7.72573816493 |
| NM_001161346 | CHFR   | 1944 | 1995 | 6.13693181435 |
| NM_001161346 | CHFR   | 374  | 447  | 7.1409494143  |
| NM_001161346 | CHFR   | 788  | 859  | 6.14094917861 |
| NM_000937    | POLR2A | 1692 | 1801 | 7.14018472193 |
| NM_000937    | POLR2A | 4848 | 4879 | 4.13616712176 |
| NM_000937    | POLR2A | 2887 | 2987 | 6.94753964399 |
| NM_000937    | POLR2A | 2987 | 3053 | 6.94753964399 |
| NM_000937    | POLR2A | 4249 | 4300 | 5.72514698673 |
| NM_000937    | POLR2A | 4565 | 4613 | 5.72514722243 |
| NM_000937    | POLR2A | 4628 | 4707 | 5.72514722265 |
| NM_000937    | POLR2A | 2261 | 2344 | 6.72514722265 |
| NM_000937    | POLR2A | 1801 | 1948 | 7.46211281682 |
| NM_000937    | POLR2A | 3055 | 3118 | 5.14018472193 |
| NM_000937    | POLR2A | 5280 | 5401 | 4.14018472193 |
| NM_000937    | POLR2A | 1332 | 1505 | 6.94753964399 |
| NM_000937    | POLR2A | 2181 | 2260 | 4.14018472193 |
| NM_000937    | POLR2A | 1972 | 2109 | 5.72514722265 |
| NM_000937    | POLR2A | 3558 | 3658 | 5.72514722265 |
| NM_000937    | POLR2A | 3658 | 3902 | 8.46211281682 |
| NM_000937    | POLR2A | 647  | 789  | 7.94753964399 |

|           |        |      |      |                |
|-----------|--------|------|------|----------------|
| NM_000937 | POLR2A | 2353 | 2883 | 9.86810517649  |
| NM_000937 | POLR2A | 861  | 1107 | 7.94753964399  |
| NM_000937 | POLR2A | 1155 | 1277 | 7.14018472193  |
| NM_000937 | POLR2A | 1523 | 1634 | 6.14018472193  |
| NM_000937 | POLR2A | 5423 | 5521 | 4.14018472192  |
| NM_000937 | POLR2A | 6407 | 6548 | 7.14018472193  |
| NM_000937 | POLR2A | 437  | 643  | 7.84062444007  |
| NM_000937 | POLR2A | 3935 | 4249 | 8.84062444007  |
| NM_000937 | POLR2A | 3133 | 3525 | 8.04707531754  |
| NM_000937 | POLR2A | 5150 | 5247 | 5.72514698673  |
| NM_000937 | POLR2A | 4317 | 4551 | 7.14018472193  |
| NM_000935 | PL0D2  | 3159 | 3269 | 3.56823314409  |
| NM_000935 | PL0D2  | 322  | 360  | 1.89913143398  |
| NM_000935 | PL0D2  | 3048 | 3150 | 1.98327064337  |
| NM_000935 | PL0D2  | 3558 | 3601 | 1.98309689305  |
| NM_000935 | PL0D2  | 390  | 453  | 2.56823314387  |
| NM_000935 | PL0D2  | 902  | 1118 | 5.93746695375  |
| NM_000935 | PL0D2  | 3503 | 3543 | 1.89913143398  |
| NM_000935 | PL0D2  | 3627 | 3720 | 0.983270643367 |
| NM_000935 | PL0D2  | 2020 | 2150 | 5.442702262    |
| NM_000935 | PL0D2  | 3849 | 3898 | 1.97925304319  |
| NM_000935 | PL0D2  | 690  | 879  | 5.79062556543  |
| NM_000935 | PL0D2  | 1500 | 2020 | 7.50683259942  |
| NM_000935 | PL0D2  | 500  | 669  | 4.56823314409  |
| NM_000935 | PL0D2  | 2151 | 2995 | 7.81616065753  |
| NM_000935 | PL0D2  | 1144 | 1246 | 4.15319564481  |
| NM_000935 | PL0D2  | 3727 | 3798 | 2.56823314409  |
| NM_000935 | PL0D2  | 1249 | 1497 | 6.34082264799  |
| NM_007214 | SEC63  | 207  | 256  | 4.21730915992  |
| NM_007214 | SEC63  | 278  | 317  | 2.63217290888  |
| NM_007214 | SEC63  | 2261 | 2434 | 5.95427475408  |
| NM_007214 | SEC63  | 3744 | 3798 | 2.54820744981  |
| NM_007214 | SEC63  | 3430 | 3470 | 3.63234642328  |
| NM_007214 | SEC63  | 706  | 829  | 4.6323466592   |
| NM_007214 | SEC63  | 3223 | 3349 | 5.95427475408  |
| NM_007214 | SEC63  | 2797 | 2856 | 3.63233992814  |
| NM_007214 | SEC63  | 329  | 470  | 4.21730915992  |
| NM_007214 | SEC63  | 2026 | 2122 | 2.63234665919  |
| NM_007214 | SEC63  | 1470 | 1592 | 5.6323466592   |
| NM_007214 | SEC63  | 1597 | 1769 | 5.43970158125  |
| NM_007214 | SEC63  | 539  | 697  | 5.6323466592   |
| NM_007214 | SEC63  | 972  | 1245 | 6.88027417264  |
| NM_007214 | SEC63  | 2464 | 2620 | 4.95427475408  |
| NM_007214 | SEC63  | 3076 | 3145 | 4.62832905902  |
| NM_007214 | SEC63  | 836  | 971  | 6.71980950045  |
| NM_007214 | SEC63  | 1278 | 1469 | 4.95427475408  |
| NM_000932 | PLCB3  | 1342 | 1414 | 7.16105440921  |
| NM_000932 | PLCB3  | 2647 | 2688 | 7.16088089482  |
| NM_000932 | PLCB3  | 2294 | 2368 | 8.74584339554  |
| NM_000932 | PLCB3  | 1003 | 1105 | 7.15703704496  |

|           |         |      |      |               |
|-----------|---------|------|------|---------------|
| NM_000932 | PLCB3   | 415  | 495  | 8.16088089482 |
| NM_014495 | ANGPTL3 | 321  | 349  | 7.1197354923  |
| NM_014495 | ANGPTL3 | 150  | 219  | 7.12375308493 |
| NM_014495 | ANGPTL3 | 357  | 468  | 8.12375309247 |
| NM_014495 | ANGPTL3 | 95   | 145  | 7.1197354923  |
| NM_014495 | ANGPTL3 | 513  | 640  | 9.12375309247 |
| NM_014495 | ANGPTL3 | 673  | 742  | 8.7087155932  |
| NM_014495 | ANGPTL3 | 743  | 842  | 8.7087155932  |
| NM_014495 | ANGPTL3 | 846  | 1126 | 11.0306436881 |
| NM_014495 | ANGPTL3 | 2032 | 2102 | 8.03961388309 |
| NM_014495 | ANGPTL3 | 1369 | 1478 | 9.44568118736 |
| NM_006565 | CTCF    | 1910 | 1967 | 5.95190697514 |
| NM_006565 | CTCF    | 2256 | 2304 | 6.5328521116  |
| NM_006565 | CTCF    | 1846 | 1892 | 6.5328521116  |
| NM_006565 | CTCF    | 3784 | 3851 | 4.95190721083 |
| NM_006565 | CTCF    | 308  | 376  | 5.95190048    |
| NM_006565 | CTCF    | 610  | 656  | 5.94788961088 |
| NM_006565 | CTCF    | 2784 | 2862 | 5.95190048    |
| NM_000938 | POLR2B  | 3593 | 3662 | 5.95656316842 |
| NM_000938 | POLR2B  | 3076 | 3157 | 5.95656316842 |
| NM_000938 | POLR2B  | 3000 | 3066 | 5.54152543323 |
| NM_000938 | POLR2B  | 2572 | 2616 | 5.54152566914 |
| NM_000938 | POLR2B  | 3508 | 3561 | 4.95656316087 |
| NM_000938 | POLR2B  | 443  | 484  | 3.87242395904 |
| NM_000938 | POLR2B  | 1738 | 1967 | 8.54152566914 |
| NM_000938 | POLR2B  | 1087 | 1118 | 5.45738645976 |
| NM_000938 | POLR2B  | 363  | 418  | 3.95656316842 |
| NM_000938 | POLR2B  | 2925 | 2993 | 6.27849126331 |
| NM_000938 | POLR2B  | 2254 | 2548 | 8.76391809048 |
| NM_000938 | POLR2B  | 3349 | 3489 | 6.76391809048 |
| NM_000938 | POLR2B  | 1130 | 1406 | 8.71145067059 |
| NM_000938 | POLR2B  | 850  | 951  | 6.95656316842 |
| NM_000938 | POLR2B  | 1969 | 2213 | 8.12648816987 |
| NM_000938 | POLR2B  | 0    | 342  | 9.04402600967 |
| NM_000938 | POLR2B  | 502  | 646  | 7.12648816987 |
| NM_000938 | POLR2B  | 2668 | 2916 | 8.20449068187 |
| NM_000938 | POLR2B  | 3197 | 3344 | 7.27849126331 |
| NM_000938 | POLR2B  | 1425 | 1700 | 7.86345376403 |
| NM_000938 | POLR2B  | 656  | 842  | 7.27849126331 |
| NM_003919 | SGCE    | 1193 | 1254 | 7.31765705073 |
| NM_003919 | SGCE    | 609  | 663  | 7.31765705073 |
| NM_003919 | SGCE    | 1024 | 1099 | 6.99572895584 |
| NM_003919 | SGCE    | 135  | 171  | 4.99171135567 |
| NM_003919 | SGCE    | 235  | 283  | 5.99572871993 |
| NM_003919 | SGCE    | 500  | 571  | 6.99572895584 |
| NM_003919 | SGCE    | 674  | 734  | 4.9955520553  |
| NM_003919 | SGCE    | 1265 | 1343 | 6.58069144902 |
| NM_003919 | SGCE    | 1344 | 1454 | 7.58069145657 |
| NM_003919 | SGCE    | 1101 | 1176 | 4.99572222479 |
| NM_003919 | SGCE    | 828  | 1017 | 7.8030838779  |

|              |        |      |      |               |
|--------------|--------|------|------|---------------|
| NM_001160125 | KLF6   | 428  | 490  | 7.25643229978 |
| NM_001160125 | KLF6   | 1992 | 2025 | 6.25643206386 |
| NM_001160125 | KLF6   | 3301 | 3375 | 8.8413948005  |
| NM_001160125 | KLF6   | 2174 | 2233 | 7.25642556873 |
| NM_001160125 | KLF6   | 661  | 743  | 7.25643229978 |
| NM_001160125 | KLF6   | 1754 | 1843 | 7.8413948005  |
| NM_001160125 | KLF6   | 2911 | 2990 | 8.8413948005  |
| NM_001160125 | KLF6   | 3392 | 3442 | 7.25643229978 |
| NM_001160125 | KLF6   | 302  | 355  | 6.25625854946 |
| NM_001160125 | KLF6   | 95   | 150  | 7.25643206386 |
| NM_001160125 | KLF6   | 493  | 652  | 7.8413948005  |
| NM_003913    | PRPF4B | 1766 | 1812 | 4.38352405779 |
| NM_003913    | PRPF4B | 1459 | 1508 | 3.79856805221 |
| NM_003913    | PRPF4B | 2572 | 2636 | 3.79856828058 |
| NM_003913    | PRPF4B | 5571 | 5633 | 2.71442907874 |
| NM_003913    | PRPF4B | 1604 | 1676 | 4.3835307813  |
| NM_003913    | PRPF4B | 2694 | 2741 | 2.79856828812 |
| NM_003913    | PRPF4B | 1286 | 1365 | 2.79455068795 |
| NM_003913    | PRPF4B | 1963 | 2066 | 4.38353078863 |
| NM_003913    | PRPF4B | 3264 | 3342 | 3.79856828058 |
| NM_003913    | PRPF4B | 3778 | 3852 | 3.79856155707 |
| NM_003913    | PRPF4B | 2068 | 2176 | 3.79856828813 |
| NM_003913    | PRPF4B | 2894 | 3067 | 5.12049638301 |
| NM_003913    | PRPF4B | 6881 | 6945 | 2.79856828058 |
| NM_000179    | MSH6   | 3950 | 4013 | 3.54811228144 |
| NM_000179    | MSH6   | 2257 | 2326 | 6.35564095382 |
| NM_000179    | MSH6   | 1238 | 1292 | 4.54828603175 |
| NM_000179    | MSH6   | 103  | 176  | 5.54828579584 |
| NM_000179    | MSH6   | 857  | 950  | 5.87021389073 |
| NM_000179    | MSH6   | 3014 | 3093 | 5.13324853248 |
| NM_000179    | MSH6   | 701  | 755  | 4.54426843159 |
| NM_000179    | MSH6   | 2716 | 2752 | 3.54827930071 |
| NM_000179    | MSH6   | 3667 | 3700 | 3.54828602421 |
| NM_000179    | MSH6   | 2359 | 2427 | 5.87021412665 |
| NM_000179    | MSH6   | 1142 | 1216 | 5.13324853248 |
| NM_000179    | MSH6   | 2752 | 2798 | 5.54828603154 |
| NM_000179    | MSH6   | 1976 | 2088 | 5.87021412665 |
| NM_000179    | MSH6   | 3471 | 3573 | 6.54828603176 |
| NM_000179    | MSH6   | 1816 | 1929 | 5.87021412665 |
| NM_000179    | MSH6   | 1557 | 1720 | 6.13324853248 |
| NM_000179    | MSH6   | 1347 | 1501 | 5.87021412665 |
| NM_000179    | MSH6   | 2802 | 2874 | 6.13324853248 |
| NM_000179    | MSH6   | 2892 | 3009 | 5.87021412665 |
| NM_000179    | MSH6   | 4073 | 4277 | 6.54828603176 |
| NM_000179    | MSH6   | 2127 | 2177 | 4.54811228144 |
| NM_000179    | MSH6   | 985  | 1115 | 5.13324853248 |
| NM_000179    | MSH6   | 3717 | 3917 | 5.54828603176 |
| NM_000179    | MSH6   | 2476 | 2622 | 6.87021412665 |
| NM_000179    | MSH6   | 3122 | 3410 | 7.87021412665 |
| NM_003917    | AP1G2  | 2302 | 2353 | 5.58223874685 |

|              |          |      |      |                    |
|--------------|----------|------|------|--------------------|
| NM_003917    | AP1G2    | 1293 | 1360 | 5.58223225172      |
| NM_003917    | AP1G2    | 1062 | 1121 | 6.58223225172      |
| NM_003917    | AP1G2    | 1753 | 1849 | 5.58223898276      |
| NM_003917    | AP1G2    | 2113 | 2220 | 7.16720148349      |
| NM_014498    | GOLIM4   | 669  | 725  | 2.406055152        |
| NM_014498    | GOLIM4   | 1177 | 1228 | 3.41007251626      |
| NM_014498    | GOLIM4   | 2692 | 2743 | 3.40989900186      |
| NM_014498    | GOLIM4   | 2595 | 2641 | 3.9950352529       |
| NM_014498    | GOLIM4   | 2004 | 2057 | 2.406055152        |
| NM_014498    | GOLIM4   | 770  | 898  | 4.41007275218      |
| NM_014498    | GOLIM4   | 1842 | 1929 | 2.41007275218      |
| NM_014498    | GOLIM4   | 2223 | 2288 | 3.91089604351      |
| NM_014498    | GOLIM4   | 1302 | 1401 | 3.41007275217      |
| NM_014498    | GOLIM4   | 199  | 303  | 4.41007275218      |
| NM_014498    | GOLIM4   | 2747 | 2826 | 2.41007275196      |
| NM_014498    | GOLIM4   | 951  | 1104 | 3.9950352529       |
| NM_014498    | GOLIM4   | 2463 | 2558 | 3.41007275218      |
| NM_014498    | GOLIM4   | 332  | 447  | 4.9950352529       |
| NM_014498    | GOLIM4   | 523  | 599  | 3.41007275196      |
| NM_199367    | SPG7     | 278  | 313  | 4.36715659795      |
| NM_199367    | SPG7     | 829  | 891  | 5.45129580734      |
| NM_001077685 | AGAP7    | 2112 | 2151 | 9.55336169324      |
| NM_001077685 | AGAP7    | 924  | 979  | 7.88827758331      |
| NM_024729    | MYH14    | 1481 | 1571 | 9.96171915595      |
| NM_024729    | MYH14    | 3350 | 3446 | 7.37674992417      |
| NM_024729    | MYH14    | 788  | 848  | 8.37675665522      |
| NM_024729    | MYH14    | 1934 | 2013 | 7.37658290491      |
| NM_024729    | MYH14    | 4476 | 4538 | 8.376756655        |
| NM_024729    | MYH14    | 3956 | 3994 | 7.37675641931      |
| NM_024729    | MYH14    | 4385 | 4444 | 8.37675665522      |
| NM_024729    | MYH14    | 567  | 659  | 9.37675665522      |
| NM_024729    | MYH14    | 2565 | 2614 | 8.37273905505      |
| NM_024729    | MYH14    | 1184 | 1380 | 9.69868475011      |
| NM_024729    | MYH14    | 1604 | 1669 | 8.96171915595      |
| NM_024729    | MYH14    | 5132 | 5251 | 8.96171915594      |
| NM_024729    | MYH14    | 1806 | 1926 | 8.96171915595      |
| NM_024729    | MYH14    | 1683 | 1722 | 8.95770155577      |
| NM_024729    | MYH14    | 6300 | 6390 | 9.37675665522      |
| NM_024729    | MYH14    | 4306 | 4381 | 8.37675665522      |
| NM_024729    | MYH14    | 4560 | 4730 | 8.96171915595      |
| NM_024729    | MYH14    | 2782 | 2838 | 7.37675641931      |
| NM_024729    | MYH14    | 2970 | 3125 | 8.96171915595      |
| NM_024729    | MYH14    | 396  | 525  | 9.37675665522      |
| NM_024729    | MYH14    | 2219 | 2416 | 10.1841115773      |
| NM_024729    | MYH14    | 855  | 992  | 9.96171915595      |
| NM_024729    | MYH14    | 6394 | 6611 | 11.9003186113      |
| NM_024729    | MYH14    | 4776 | 4871 | 8.96171915595      |
| NM_024729    | MYH14    | 6103 | 6216 | 8.37675665522      |
| NM_024729    | MYH14    | 6617 | 6736 | 8.37675665522      |
| NM_001164665 | KIAA1549 |      | 1829 | 1897 11.6153161748 |

|              |          |      |      |      |               |
|--------------|----------|------|------|------|---------------|
| NM_001164665 | KIAA1549 |      | 730  | 789  | 11.6153159464 |
| NM_001164665 | KIAA1549 |      | 1717 | 1768 | 10.6153094513 |
| NM_001164665 | KIAA1549 |      | 6249 | 6334 | 10.6153161824 |
| NM_001164665 | KIAA1549 |      | 2055 | 2097 | 10.6153094513 |
| NM_001164665 | KIAA1549 |      | 1141 | 1221 | 10.6153159464 |
| NM_001164665 | KIAA1549 |      | 3656 | 3714 | 10.6153094513 |
| NM_001164665 | KIAA1549 |      | 4438 | 4479 | 10.6112985822 |
| NM_001164665 | KIAA1549 |      | 4138 | 4230 | 11.6153161821 |
| NM_001164665 | KIAA1549 |      | 4953 | 5021 | 10.615142432  |
| NM_001164665 | KIAA1549 |      | 5100 | 5135 | 10.6112985822 |
| NM_001164665 | KIAA1549 |      | 3197 | 3257 | 12.1962610829 |
| NM_001164665 | KIAA1549 |      | 2443 | 2535 | 13.2002786831 |
| NM_001164665 | KIAA1549 |      | 3942 | 4024 | 10.6153094513 |
| NM_001164665 | KIAA1549 |      | 228  | 300  | 12.6153161824 |
| NM_007074    | COR01A   | 1185 | 1215 |      | 8.88839859921 |
| NM_018718    | TSGA14   | 818  | 861  |      | 9.32026449525 |
| NM_001204077 | UBE4A    | 1797 | 1866 |      | 9.73803204884 |
| NM_001204077 | UBE4A    | 3380 | 3432 |      | 7.93067712678 |
| NM_001204077 | UBE4A    | 1412 | 1476 |      | 9.5156396275  |
| NM_001204077 | UBE4A    | 5583 | 5631 |      | 8.51563939158 |
| NM_001204077 | UBE4A    | 3648 | 3720 |      | 8.51563939158 |
| NM_001204077 | UBE4A    | 3917 | 3977 |      | 6.93067039573 |
| NM_001204077 | UBE4A    | 480  | 547  |      | 8.93067712678 |
| NM_001204077 | UBE4A    | 3278 | 3363 |      | 6.93067712678 |
| NM_001204077 | UBE4A    | 5875 | 5972 |      | 7.93067689086 |
| NM_001204077 | UBE4A    | 5472 | 5522 |      | 8.93067712678 |
| NM_001204077 | UBE4A    | 559  | 602  |      | 8.51563289645 |
| NM_001204077 | UBE4A    | 3464 | 3519 |      | 6.93067712678 |
| NM_001204077 | UBE4A    | 5700 | 5746 |      | 7.92665952661 |
| NM_001204077 | UBE4A    | 5162 | 5237 |      | 8.51563961995 |
| NM_001204077 | UBE4A    | 3564 | 3633 |      | 9.73803204883 |
| NM_001204077 | UBE4A    | 846  | 902  |      | 9.51563961995 |
| NM_001204077 | UBE4A    | 2686 | 2804 |      | 8.93067712678 |
| NM_001204077 | UBE4A    | 2572 | 2682 |      | 6.93067712678 |
| NM_001204077 | UBE4A    | 2808 | 2961 |      | 9.25260522167 |
| NM_001204077 | UBE4A    | 1104 | 1188 |      | 9.5156396275  |
| NM_001204077 | UBE4A    | 70   | 101  |      | 8.8465379174  |
| NM_001204077 | UBE4A    | 1264 | 1372 |      | 9.25260522167 |
| NM_001204077 | UBE4A    | 343  | 433  |      | 8.51563962728 |
| NM_001204077 | UBE4A    | 2220 | 2387 |      | 10.1006021282 |
| NM_001204077 | UBE4A    | 5237 | 5334 |      | 8.51563961995 |
| NM_001204077 | UBE4A    | 3851 | 3917 |      | 7.93067712678 |
| NM_001204077 | UBE4A    | 2402 | 2535 |      | 9.25260522167 |
| NM_001204077 | UBE4A    | 1880 | 1962 |      | 9.25260522167 |
| NM_001204077 | UBE4A    | 4308 | 4381 |      | 7.93067712678 |
| NM_001204077 | UBE4A    | 229  | 334  |      | 9.5156396275  |
| NM_001204077 | UBE4A    | 2011 | 2178 |      | 9.5156396275  |
| NM_001204077 | UBE4A    | 1476 | 1694 |      | 10.6311168449 |
| NM_001204077 | UBE4A    | 906  | 1089 |      | 10.2526052217 |
| NM_001167869 | ATP5SL   | 681  | 714  |      | 5.83421568801 |



|              |          |      |      |               |               |
|--------------|----------|------|------|---------------|---------------|
| NM_001167869 | ATP5SL   | 388  | 462  | 4.91835489739 |               |
| NM_001167869 | ATP5SL   | 235  | 279  | 5.83421568801 |               |
| NM_001167869 | ATP5SL   | 463  | 529  | 4.91818114707 |               |
| NM_001167869 | ATP5SL   | 1135 | 1230 | 5.91835489739 |               |
| NM_001161562 | TNIK     | 5438 | 5501 | 11.5924395549 |               |
| NM_001161562 | TNIK     | 379  | 448  | 13.1814129248 |               |
| NM_173620    | HEXDC    | 661  | 716  | 7.03400382224 |               |
| NM_000506    | F2       | 1001 | 1116 | 4.28213089745 |               |
| NM_000506    | F2       | 871  | 924  | 2.47075837522 |               |
| NM_000506    | F2       | 1794 | 1841 | 1.47477573948 |               |
| NM_000506    | F2       | 1629 | 1676 | 1.39063676601 |               |
| NM_000506    | F2       | 1363 | 1460 | 1.4747759754  |               |
| NM_000506    | F2       | 1869 | 1919 | 1.47075837522 |               |
| NM_000506    | F2       | 338  | 425  | 4.05973847612 |               |
| NM_000506    | F2       | 1244 | 1345 | 2.4747759754  |               |
| NM_000506    | F2       | 454  | 547  | 2.47476924434 |               |
| NM_000506    | F2       | 1122 | 1182 | 3.0595647258  |               |
| NM_032311    | POLDIP3  | 1264 | 1314 | 5.03518398339 |               |
| NM_032311    | POLDIP3  | 71   | 124  | 5.03902783324 |               |
| NM_032311    | POLDIP3  | 1438 | 1496 | 7.03919485251 |               |
| NM_032311    | POLDIP3  | 1652 | 1703 | 5.95506237418 |               |
| NM_032311    | POLDIP3  | 929  | 1022 | 6.03920158356 |               |
| NM_032311    | POLDIP3  | 1519 | 1611 | 7.03920158356 |               |
| NM_006951    | TAF5     | 1661 | 1703 | 7.96905295914 |               |
| NM_006951    | TAF5     | 1944 | 2032 | 7.97306382826 |               |
| NM_006951    | TAF5     | 1429 | 1515 | 9.55802632898 |               |
| NM_032315    | SLC25A33 |      | 931  | 973           | 4.38395359111 |
| NM_032315    | SLC25A33 |      | 1217 | 1282          | 6.04903770104 |
| NM_145280    | METTL21A |      | 431  | 479           | 5.25847505695 |
| NM_145280    | METTL21A |      | 1874 | 1970          | 5.25848178801 |
| NM_001145134 | CPT1B    | 2483 | 2542 | 8.16995017491 |               |
| NM_001145134 | CPT1B    | 2410 | 2482 | 9.16995016736 |               |
| NM_001145134 | CPT1B    | 524  | 596  | 8.16593257474 |               |
| NM_153013    | NADKD1   | 502  | 541  | 5.12963142899 |               |
| NM_153013    | NADKD1   | 2874 | 2927 | 4.13364879324 |               |
| NM_153013    | NADKD1   | 1501 | 1552 | 5.71861152988 |               |
| NM_153013    | NADKD1   | 2453 | 2502 | 4.12963142899 |               |
| NM_153013    | NADKD1   | 543  | 621  | 5.71861152988 |               |
| NM_153013    | NADKD1   | 885  | 953  | 5.13364902916 |               |
| NM_153013    | NADKD1   | 640  | 707  | 6.13364902916 |               |
| NM_153013    | NADKD1   | 1739 | 1793 | 5.1336422981  |               |
| NM_153013    | NADKD1   | 1981 | 2029 | 5.12963142899 |               |
| NM_153013    | NADKD1   | 2371 | 2410 | 5.13364879324 |               |
| NM_153013    | NADKD1   | 390  | 472  | 5.71861152988 |               |
| NM_153013    | NADKD1   | 1030 | 1266 | 8.52596645194 |               |
| NM_153013    | NADKD1   | 186  | 359  | 7.5930806478  |               |
| NM_153013    | NADKD1   | 3257 | 3362 | 5.13364902915 |               |
| NM_153013    | NADKD1   | 763  | 885  | 6.13364902916 |               |
| NM_153013    | NADKD1   | 1284 | 1434 | 7.5930806478  |               |
| NM_153013    | NADKD1   | 954  | 1027 | 5.12963142899 |               |

|              |          |      |      |               |               |
|--------------|----------|------|------|---------------|---------------|
| NM_207333    | ZNF320   | 2116 | 2186 | 10.2195431934 |               |
| NM_001195610 | DCDC2    | 2593 | 2637 | 4.07853807263 |               |
| NM_001195610 | DCDC2    | 491  | 538  | 4.08238192249 |               |
| NM_006443    | C6orf108 |      | 217  | 296           | 6.95080330548 |
| NM_006443    | C6orf108 |      | 559  | 615           | 5.36584079744 |
| NM_006443    | C6orf108 |      | 100  | 187           | 7.36584056907 |
| NM_014646    | LPIN2    | 3747 | 3812 | 6.72746366952 |               |
| NM_014646    | LPIN2    | 5157 | 5212 | 5.72746367707 |               |
| NM_014646    | LPIN2    | 2768 | 2819 | 5.72746366952 |               |
| NM_014646    | LPIN2    | 3401 | 3444 | 6.72746344115 |               |
| NM_014646    | LPIN2    | 4914 | 4992 | 5.72746367707 |               |
| NM_014646    | LPIN2    | 2053 | 2108 | 5.72728992675 |               |
| NM_014646    | LPIN2    | 367  | 421  | 6.72746367685 |               |
| NM_014646    | LPIN2    | 1452 | 1493 | 5.72746366952 |               |
| NM_014646    | LPIN2    | 1588 | 1673 | 6.31242617757 |               |
| NM_014646    | LPIN2    | 5414 | 5486 | 6.31242617779 |               |
| NM_014646    | LPIN2    | 5494 | 5538 | 4.7234460769  |               |
| NM_014646    | LPIN2    | 2619 | 2671 | 4.64332446769 |               |
| NM_014646    | LPIN2    | 5539 | 5593 | 6.31242617779 |               |
| NM_014646    | LPIN2    | 2250 | 2385 | 7.31242617779 |               |
| NM_014646    | LPIN2    | 4672 | 4758 | 4.72746367707 |               |
| NM_014646    | LPIN2    | 247  | 317  | 4.72746367707 |               |
| NM_014646    | LPIN2    | 2821 | 2917 | 4.72746367707 |               |
| NM_014646    | LPIN2    | 4758 | 4898 | 6.31242617779 |               |
| NM_014646    | LPIN2    | 1710 | 1802 | 5.72746367707 |               |
| NM_014646    | LPIN2    | 424  | 520  | 6.72746367707 |               |
| NM_014646    | LPIN2    | 1068 | 1116 | 5.64332446769 |               |
| NM_014647    | KIAA0430 |      | 835  | 893           | 7.05586702252 |
| NM_014647    | KIAA0430 |      | 1103 | 1164          | 7.05202317266 |
| NM_014647    | KIAA0430 |      | 4159 | 4213          | 8.55686406417 |
| NM_014647    | KIAA0430 |      | 974  | 1042          | 8.05603404178 |
| NM_014647    | KIAA0430 |      | 7312 | 7376          | 8.05202317266 |
| NM_014647    | KIAA0430 |      | 5998 | 6053          | 8.05202317266 |
| NM_014647    | KIAA0430 |      | 4529 | 4624          | 7.05604053692 |
| NM_014647    | KIAA0430 |      | 5033 | 5152          | 9.64100327356 |
| NM_014647    | KIAA0430 |      | 4399 | 4453          | 8.05202317266 |
| NM_014640    | TTLL4    | 3927 | 3993 | 7.4114821744  |               |
| NM_014640    | TTLL4    | 3875 | 3927 | 6.82651943798 |               |
| NM_014640    | TTLL4    | 680  | 729  | 7.8265196739  |               |
| NM_014640    | TTLL4    | 1661 | 1727 | 7.4114819387  |               |
| NM_014640    | TTLL4    | 163  | 213  | 5.82250207373 |               |
| NM_014640    | TTLL4    | 3136 | 3194 | 5.82651967368 |               |
| NM_014640    | TTLL4    | 1876 | 1972 | 8.14844776879 |               |
| NM_014640    | TTLL4    | 2652 | 2738 | 8.8265196739  |               |
| NM_014640    | TTLL4    | 3414 | 3485 | 7.4114819387  |               |
| NM_014640    | TTLL4    | 2889 | 3070 | 9.14844776879 |               |
| NM_014640    | TTLL4    | 3544 | 3693 | 8.14844776879 |               |
| NM_014640    | TTLL4    | 3263 | 3412 | 8.8265196739  |               |
| NM_014640    | TTLL4    | 233  | 285  | 7.41148217462 |               |
| NM_014640    | TTLL4    | 1990 | 2051 | 5.82651294284 |               |

|           |        |      |      |               |
|-----------|--------|------|------|---------------|
| NM_014640 | TTLL4  | 4555 | 4709 | 8.41148217462 |
| NM_014641 | MDC1   | 4873 | 4927 | 7.24293979721 |
| NM_014641 | MDC1   | 609  | 651  | 7.24293979721 |
| NM_014641 | MDC1   | 6325 | 6387 | 7.24294652826 |
| NM_014641 | MDC1   | 685  | 747  | 7.82790902898 |
| NM_014641 | MDC1   | 6565 | 6639 | 6.24294652071 |
| NM_014641 | MDC1   | 4134 | 4198 | 7.15880731888 |
| NM_014641 | MDC1   | 7302 | 7340 | 6.15880731888 |
| NM_014641 | MDC1   | 4525 | 4576 | 6.15880731888 |
| NM_014641 | MDC1   | 4350 | 4435 | 8.24293979721 |
| NM_014641 | MDC1   | 5650 | 5684 | 7.15880731888 |
| NM_014641 | MDC1   | 4007 | 4052 | 6.24277277794 |
| NM_014641 | MDC1   | 5093 | 5192 | 7.24294652826 |
| NM_014641 | MDC1   | 4058 | 4126 | 7.24294652826 |
| NM_014641 | MDC1   | 6761 | 6885 | 6.24294652826 |
| NM_014641 | MDC1   | 777  | 892  | 7.82790902898 |
| NM_014641 | MDC1   | 5217 | 5316 | 8.24293979721 |
| NM_014641 | MDC1   | 3863 | 3952 | 6.24294629234 |
| NM_014643 | ZNF516 | 1445 | 1508 | 7.74706809688 |
| NM_005516 | HLA-E  | 743  | 839  | 3.8751482839  |
| NM_005516 | HLA-E  | 219  | 294  | 6.46011078462 |
| NM_005516 | HLA-E  | 1023 | 1132 | 6.68250320596 |
| NM_005516 | HLA-E  | 853  | 911  | 5.46011078462 |
| NM_005516 | HLA-E  | 917  | 963  | 4.87497453358 |
| NM_005516 | HLA-E  | 106  | 149  | 5.4599370343  |
| NM_005516 | HLA-E  | 174  | 208  | 3.87113068373 |
| NM_005516 | HLA-E  | 1699 | 1744 | 4.87514155285 |
| NM_005516 | HLA-E  | 1800 | 1861 | 3.87497453358 |
| NM_005516 | HLA-E  | 505  | 657  | 6.19707637879 |
| NM_005516 | HLA-E  | 1892 | 2027 | 6.46011078462 |
| NM_005516 | HLA-E  | 1292 | 1453 | 7.46011078462 |
| NM_005516 | HLA-E  | 1142 | 1287 | 7.19707637879 |
| NM_005516 | HLA-E  | 336  | 458  | 6.19707637879 |
| NM_005517 | HMG2   | 837  | 905  | 5.89038442083 |
| NM_005517 | HMG2   | 629  | 684  | 4.30541518906 |
| NM_005517 | HMG2   | 230  | 285  | 5.30542168419 |
| NM_005517 | HMG2   | 739  | 780  | 4.22128271073 |
| NM_005517 | HMG2   | 414  | 540  | 7.89038442083 |
| NM_005517 | HMG2   | 545  | 589  | 5.30542191256 |
| NM_005517 | HMG2   | 905  | 975  | 4.30140431994 |
| NM_005517 | HMG2   | 1083 | 1283 | 8.39288476136 |
| NM_005517 | HMG2   | 77   | 136  | 4.30542192011 |
| NM_005517 | HMG2   | 975  | 1066 | 5.30542192011 |
| NM_005514 | HLA-B  | 336  | 390  | 4.54601327655 |
| NM_005514 | HLA-B  | 751  | 836  | 5.13097577727 |
| NM_005514 | HLA-B  | 999  | 1059 | 4.54601327633 |
| NM_005514 | HLA-B  | 1101 | 1153 | 5.13097577727 |
| NM_005514 | HLA-B  | 1154 | 1196 | 3.54601304063 |
| NM_005514 | HLA-B  | 267  | 321  | 4.54601327654 |
| NM_005514 | HLA-B  | 1386 | 1508 | 5.54601327655 |

|              |        |      |      |               |
|--------------|--------|------|------|---------------|
| NM_005514    | HLA-B  | 698  | 750  | 3.54199567637 |
| NM_005514    | HLA-B  | 1204 | 1298 | 5.13097577727 |
| NM_005514    | HLA-B  | 469  | 594  | 5.13097577727 |
| NM_014649    | SAFB2  | 519  | 629  | 5.37711266115 |
| NM_014649    | SAFB2  | 3072 | 3128 | 5.37309506098 |
| NM_014649    | SAFB2  | 1833 | 1883 | 4.37309506098 |
| NM_014649    | SAFB2  | 274  | 382  | 6.37711266115 |
| NM_014649    | SAFB2  | 768  | 845  | 4.3771126536  |
| NM_014649    | SAFB2  | 908  | 1018 | 5.37711266114 |
| NM_003774    | GALNT4 | 1393 | 1436 | 9.02908959619 |
| NM_003774    | GALNT4 | 2641 | 2671 | 8.94512413712 |
| NM_003774    | GALNT4 | 313  | 356  | 9.02524574633 |
| NM_003774    | GALNT4 | 3127 | 3180 | 8.02524574633 |
| NM_003774    | GALNT4 | 134  | 189  | 8.02926311059 |
| NM_003774    | GALNT4 | 1143 | 1255 | 9.02926334651 |
| NM_003774    | GALNT4 | 1502 | 1555 | 7.94512413712 |
| NM_003774    | GALNT4 | 2675 | 2775 | 9.02926334651 |
| NM_003774    | GALNT4 | 2775 | 2809 | 9.02524574633 |
| NM_003774    | GALNT4 | 766  | 804  | 8.94512413712 |
| NM_003774    | GALNT4 | 394  | 462  | 9.61421911617 |
| NM_003774    | GALNT4 | 3215 | 3277 | 8.02524574633 |
| NM_003774    | GALNT4 | 1851 | 1935 | 8.02926334651 |
| NM_003774    | GALNT4 | 1556 | 1649 | 10.3511914414 |
| NM_003774    | GALNT4 | 5274 | 5383 | 8.02925661545 |
| NM_006303    | AIMP2  | 240  | 278  | 5.81665305294 |
| NM_006303    | AIMP2  | 29   | 86   | 6.82067065311 |
| NM_006303    | AIMP2  | 292  | 341  | 7.14259874045 |
| NM_006303    | AIMP2  | 354  | 386  | 5.8206704172  |
| NM_006303    | AIMP2  | 868  | 989  | 7.142598748   |
| NM_006303    | AIMP2  | 547  | 695  | 6.82067065312 |
| NM_001172432 | PHKG2  | 983  | 1050 | 8.80858994343 |
| NM_001172432 | PHKG2  | 207  | 288  | 8.72462448436 |
| NM_001172432 | PHKG2  | 1207 | 1296 | 7.80876369374 |
| NM_001172432 | PHKG2  | 347  | 395  | 8.80858994343 |
| NM_001172432 | PHKG2  | 1142 | 1205 | 7.80876368619 |
| NM_001172432 | PHKG2  | 654  | 755  | 9.80876369374 |
| NM_001172432 | PHKG2  | 832  | 933  | 7.80876369374 |
| NM_144695    | BROX   | 3646 | 3705 | 6.74153410356 |
| NM_144695    | BROX   | 1340 | 1401 | 6.74153410356 |
| NM_144695    | BROX   | 647  | 724  | 6.74153410356 |
| NM_144695    | BROX   | 270  | 415  | 10.2009724533 |
| NM_144695    | BROX   | 3757 | 3803 | 6.73752323444 |
| NM_144695    | BROX   | 2169 | 2265 | 6.74154083462 |
| NM_144695    | BROX   | 460  | 562  | 9.32650333534 |
| NM_144695    | BROX   | 2021 | 2101 | 6.74154083462 |
| NM_006306    | SMC1A  | 4682 | 4758 | 5.48110316484 |
| NM_006306    | SMC1A  | 299  | 352  | 5.06204806539 |
| NM_006306    | SMC1A  | 4965 | 5041 | 4.48110292893 |
| NM_006306    | SMC1A  | 5499 | 5584 | 6.2884580869  |
| NM_006306    | SMC1A  | 4197 | 4287 | 6.06606566557 |

|              |          |      |      |                    |
|--------------|----------|------|------|--------------------|
| NM_006306    | SMC1A    | 831  | 916  | 4.48110316462      |
| NM_006306    | SMC1A    | 4839 | 4894 | 5.06605893451      |
| NM_006306    | SMC1A    | 4494 | 4541 | 3.47708556467      |
| NM_006306    | SMC1A    | 2277 | 2327 | 3.4811031573       |
| NM_006306    | SMC1A    | 4291 | 4334 | 3.48110316462      |
| NM_006306    | SMC1A    | 2964 | 3043 | 5.06606566557      |
| NM_006306    | SMC1A    | 1897 | 1935 | 4.47708556467      |
| NM_006306    | SMC1A    | 1940 | 2021 | 4.48109643379      |
| NM_006306    | SMC1A    | 4585 | 4653 | 3.4811031573       |
| NM_006306    | SMC1A    | 1155 | 1256 | 3.48109643379      |
| NM_006306    | SMC1A    | 640  | 694  | 4.47708556467      |
| NM_006306    | SMC1A    | 4767 | 4814 | 3.48110292893      |
| NM_006306    | SMC1A    | 5605 | 5648 | 5.06605893451      |
| NM_006306    | SMC1A    | 4379 | 4485 | 5.48110316485      |
| NM_006306    | SMC1A    | 353  | 449  | 6.06606566557      |
| NM_006306    | SMC1A    | 5278 | 5460 | 7.2884580869       |
| NM_006306    | SMC1A    | 3063 | 3164 | 6.06606566557      |
| NM_006306    | SMC1A    | 1705 | 1802 | 5.06606566557      |
| NM_006306    | SMC1A    | 2328 | 2491 | 5.80303125973      |
| NM_006306    | SMC1A    | 125  | 271  | 6.2884580869       |
| NM_006306    | SMC1A    | 3728 | 3921 | 7.65102816629      |
| NM_006306    | SMC1A    | 3922 | 4075 | 6.65102816629      |
| NM_006306    | SMC1A    | 3314 | 3525 | 7.48110316485      |
| NM_006306    | SMC1A    | 1395 | 1467 | 3.48092941453      |
| NM_006306    | SMC1A    | 468  | 568  | 5.48110316485      |
| NM_006306    | SMC1A    | 2495 | 2826 | 6.65102816629      |
| NM_006306    | SMC1A    | 3577 | 3713 | 5.80303125973      |
| NM_006304    | SHFM1    | 422  | 472  | 1.96849878994      |
| NM_006304    | SHFM1    | 22   | 80   | 2.78959686244      |
| NM_006304    | SHFM1    | 90   | 341  | 4.78960359349      |
| NM_003773    | HYAL2    | 572  | 699  | 7.80952731395      |
| NM_001203244 | SEMA4G   | 2471 | 2541 | 6.90385630462      |
| NM_001203244 | SEMA4G   | 227  | 359  | 9.90385654054      |
| NM_001203244 | SEMA4G   | 1266 | 1324 | 6.90384980948      |
| NM_001203244 | SEMA4G   | 1746 | 1794 | 6.81971733115      |
| NM_001203244 | SEMA4G   | 1814 | 1845 | 6.90368279022      |
| NM_001203244 | SEMA4G   | 476  | 525  | 9.22578462787      |
| NM_001203244 | SEMA4G   | 2275 | 2323 | 8.48864529094      |
| NM_001203244 | SEMA4G   | 2022 | 2083 | 6.90385630462      |
| NM_001203244 | SEMA4G   | 2934 | 3055 | 9.71121146259      |
| NM_001203244 | SEMA4G   | 1906 | 1971 | 6.90385653299      |
| NM_001203244 | SEMA4G   | 2569 | 2659 | 9.2257846352       |
| NM_001203244 | SEMA4G   | 1544 | 1622 | 7.90385653299      |
| NM_001203244 | SEMA4G   | 2118 | 2190 | 6.90385654031      |
| NM_001516    | GTF2H3   | 904  | 1002 | 7.55174832543      |
| NM_032349    | NUDT16L1 |      | 1100 | 1185 9.65632740772 |
| NM_032349    | NUDT16L1 |      | 704  | 786 7.6563274075   |
| NM_032349    | NUDT16L1 |      | 211  | 334 9.97825550261  |
| NM_001173393 | HAVCR1   | 507  | 571  | 8.83844713885      |
| NM_001173393 | HAVCR1   | 927  | 984  | 9.42340291607      |

|              |         |      |      |               |
|--------------|---------|------|------|---------------|
| NM_152305    | POGLUT1 | 570  | 606  | 9.24382553195 |
| NM_152305    | POGLUT1 | 2962 | 3023 | 7.65886303123 |
| NM_152305    | POGLUT1 | 1491 | 1523 | 8.5747305529  |
| NM_152305    | POGLUT1 | 1668 | 1726 | 9.15969305362 |
| NM_152305    | POGLUT1 | 1059 | 1112 | 8.65886952636 |
| NM_152305    | POGLUT1 | 426  | 495  | 8.65485216211 |
| NM_152305    | POGLUT1 | 1010 | 1053 | 9.65886303123 |
| NM_152305    | POGLUT1 | 1207 | 1297 | 8.65886976206 |
| NM_152305    | POGLUT1 | 607  | 700  | 9.243832263   |
| NM_152305    | POGLUT1 | 185  | 286  | 9.24383202708 |
| NM_152305    | POGLUT1 | 707  | 783  | 7.65886976228 |
| NM_152305    | POGLUT1 | 302  | 424  | 9.243832263   |
| NM_152305    | POGLUT1 | 828  | 1009 | 10.9807978572 |
| NM_032346    | PDCD2L  | 378  | 425  | 8.71262614109 |
| NM_032346    | PDCD2L  | 763  | 800  | 8.04353116204 |
| NM_032341    | DDI2    | 378  | 469  | 5.02443708754 |
| NM_152653    | UBE2E2  | 345  | 397  | 11.257254251  |
| NM_001185073 | CLDN12  | 1193 | 1245 | 8.19397362636 |
| NM_001185073 | CLDN12  | 1516 | 1605 | 9.77893612709 |
| NM_001185073 | CLDN12  | 3430 | 3468 | 8.18995602619 |
| NM_001185073 | CLDN12  | 120  | 172  | 7.19396689531 |
| NM_001185073 | CLDN12  | 2037 | 2104 | 8.77893612709 |
| NM_001185073 | CLDN12  | 3075 | 3161 | 8.19397361882 |
| NM_001185073 | CLDN12  | 1967 | 2018 | 9.5158949902  |
| NM_001185073 | CLDN12  | 3528 | 3596 | 9.19397362614 |
| NM_001185073 | CLDN12  | 2344 | 2432 | 8.77893612709 |
| NM_001185073 | CLDN12  | 1086 | 1176 | 10.8944133445 |
| NM_001185073 | CLDN12  | 1890 | 1967 | 8.77893612708 |
| NM_001185073 | CLDN12  | 3001 | 3071 | 7.19397339045 |
| NM_001185073 | CLDN12  | 2799 | 2979 | 10.653405245  |
| NM_001185073 | CLDN12  | 2700 | 2786 | 8.77893612708 |
| NM_001185073 | CLDN12  | 377  | 598  | 12.0013285484 |
| NM_001185073 | CLDN12  | 2193 | 2274 | 8.77491852691 |
| NM_001185073 | CLDN12  | 1748 | 1886 | 9.51590172125 |
| NM_001185073 | CLDN12  | 1319 | 1424 | 9.77893612709 |
| NM_001185073 | CLDN12  | 174  | 366  | 12.2383677457 |
| NM_001185073 | CLDN12  | 608  | 1064 | 13.100864222  |
| NM_001185073 | CLDN12  | 2490 | 2607 | 8.19397362636 |
| NM_001037637 | BTF3    | 70   | 134  | 1.556281612   |
| NM_001037637 | BTF3    | 372  | 522  | 2.556281612   |
| NM_001037637 | BTF3    | 540  | 680  | 2.556281612   |
| NM_001037637 | BTF3    | 691  | 1035 | 5.36363653406 |
| NM_002799    | PSMB7   | 379  | 438  | 4.28313856075 |
| NM_002799    | PSMB7   | 520  | 625  | 6.86810106147 |
| NM_002799    | PSMB7   | 484  | 517  | 5.86810082555 |
| NM_002799    | PSMB7   | 39   | 82   | 5.86792731115 |
| NM_002799    | PSMB7   | 184  | 372  | 6.86810106147 |
| NM_002799    | PSMB7   | 838  | 936  | 5.86792731115 |
| NM_002799    | PSMB7   | 630  | 738  | 6.60506665563 |
| NM_002798    | PSMB6   | 329  | 384  | 8.32098941367 |

|           |       |      |      |                |
|-----------|-------|------|------|----------------|
| NM_002798 | PSMB6 | 208  | 271  | 8.09859699233  |
| NM_002798 | PSMB6 | 524  | 555  | 6.42949528223  |
| NM_002798 | PSMB6 | 570  | 614  | 5.51363425569  |
| NM_002798 | PSMB6 | 387  | 512  | 7.8355625865   |
| NM_002798 | PSMB6 | 111  | 194  | 7.09859699233  |
| NM_002798 | PSMB6 | 665  | 823  | 8.51363449161  |
| NM_002791 | PSMA6 | 891  | 948  | 3.03393108858  |
| NM_002791 | PSMA6 | 122  | 162  | 0.712002757772 |
| NM_002791 | PSMA6 | 702  | 878  | 5.23556494975  |
| NM_002791 | PSMA6 | 315  | 697  | 5.71200299369  |
| NM_002791 | PSMA6 | 194  | 315  | 4.41244271183  |
| NM_002793 | PSMB1 | 41   | 170  | 6.45112998985  |
| NM_002793 | PSMB1 | 183  | 285  | 5.55804519377  |
| NM_002793 | PSMB1 | 622  | 889  | 8.0726183666   |
| NM_002793 | PSMB1 | 296  | 401  | 6.0726183666   |
| NM_002793 | PSMB1 | 405  | 462  | 5.07261836638  |
| NM_002793 | PSMB1 | 481  | 605  | 6.21012189035  |
| NM_002792 | PSMA7 | 807  | 855  | 2.39332879952  |
| NM_002792 | PSMA7 | 929  | 998  | 4.39333553057  |
| NM_002792 | PSMA7 | 231  | 367  | 5.39333553057  |
| NM_002792 | PSMA7 | 150  | 208  | 2.39333529466  |
| NM_002792 | PSMA7 | 83   | 141  | 1.3893179304   |
| NM_002792 | PSMA7 | 433  | 633  | 5.30022612618  |
| NM_002792 | PSMA7 | 657  | 792  | 4.39333553057  |
| NM_002795 | PSMB3 | 654  | 743  | 7.00515637508  |
| NM_002795 | PSMB3 | 53   | 640  | 10.2681907809  |
| NM_002794 | PSMB2 | 1189 | 1264 | 5.42253022311  |
| NM_002794 | PSMB2 | 2564 | 2612 | 5.00748599278  |
| NM_002794 | PSMB2 | 2393 | 2436 | 3.33839101373  |
| NM_002794 | PSMB2 | 1264 | 1310 | 3.42252349206  |
| NM_002794 | PSMB2 | 664  | 946  | 8.46692434247  |
| NM_002794 | PSMB2 | 312  | 419  | 6.22988514517  |
| NM_002794 | PSMB2 | 1042 | 1162 | 7.00749272383  |
| NM_002794 | PSMB2 | 424  | 664  | 7.88196184175  |
| NM_002796 | PSMB4 | 2    | 289  | 8.91225817387  |
| NM_002796 | PSMB4 | 292  | 905  | 10.4301064787  |
| NM_030755 | TMX1  | 1712 | 1775 | 4.29471659501  |
| NM_030755 | TMX1  | 1779 | 1903 | 5.70975409451  |
| NM_030755 | TMX1  | 2087 | 2189 | 5.87967909595  |
| NM_030755 | TMX1  | 160  | 955  | 9.75414821387  |
| NM_030755 | TMX1  | 2250 | 2449 | 5.51710901657  |
| NM_030755 | TMX1  | 990  | 1214 | 6.61664469012  |
| NM_001634 | AMD1  | 75   | 142  | 5.4103675844   |
| NM_001634 | AMD1  | 544  | 595  | 5.73229567928  |
| NM_001634 | AMD1  | 401  | 506  | 7.11080730254  |
| NM_001634 | AMD1  | 1929 | 1996 | 6.41036758418  |
| NM_001634 | AMD1  | 1705 | 1813 | 4.99533008512  |
| NM_001634 | AMD1  | 3057 | 3116 | 6.21772250624  |
| NM_001634 | AMD1  | 262  | 386  | 7.31725818001  |
| NM_001634 | AMD1  | 2814 | 2866 | 3.40634998423  |

|           |         |      |      |               |
|-----------|---------|------|------|---------------|
| NM_001634 | AMD1    | 2466 | 2519 | 4.41019383409 |
| NM_001634 | AMD1    | 1483 | 1609 | 6.58029258585 |
| NM_001634 | AMD1    | 653  | 983  | 8.58029258585 |
| NM_001634 | AMD1    | 986  | 1268 | 8.05422377418 |
| NM_020232 | PSMG2   | 493  | 544  | 9.08974113559 |
| NM_020232 | PSMG2   | 196  | 293  | 10.8970960576 |
| NM_020232 | PSMG2   | 860  | 996  | 9.08974113559 |
| NM_015515 | KRT23   | 2132 | 2207 | 9.06316632152 |
| NM_015515 | KRT23   | 1476 | 1542 | 7.47820382057 |
| NM_015515 | KRT23   | 633  | 687  | 6.4782038208  |
| NM_015515 | KRT23   | 1305 | 1470 | 9.64812882224 |
| NM_015515 | KRT23   | 1903 | 1956 | 6.47820358488 |
| NM_015515 | KRT23   | 1599 | 1639 | 7.47418622062 |
| NM_015515 | KRT23   | 1040 | 1293 | 9.4782038208  |
| NM_015515 | KRT23   | 1995 | 2090 | 8.80013191568 |
| NM_015515 | KRT23   | 1651 | 1892 | 10.1786435389 |
| NM_015515 | KRT23   | 779  | 912  | 9.28555874285 |
| NM_018834 | MATR3   | 149  | 247  | 4.86077279038 |
| NM_018834 | MATR3   | 2828 | 2895 | 2.98630367246 |
| NM_018834 | MATR3   | 3825 | 3863 | 2.98630366491 |
| NM_018834 | MATR3   | 3087 | 3133 | 1.40133444069 |
| NM_018834 | MATR3   | 2989 | 3044 | 3.72326903071 |
| NM_018834 | MATR3   | 3140 | 3214 | 1.40133444069 |
| NM_018834 | MATR3   | 638  | 847  | 5.2086960938  |
| NM_018834 | MATR3   | 2355 | 2425 | 3.72326926663 |
| NM_018834 | MATR3   | 848  | 1124 | 6.30823176735 |
| NM_018834 | MATR3   | 3757 | 3788 | 2.98629694141 |
| NM_018834 | MATR3   | 1751 | 1988 | 5.9249031278  |
| NM_018834 | MATR3   | 3280 | 3402 | 3.72326926663 |
| NM_018834 | MATR3   | 1156 | 1628 | 6.72326926663 |
| NM_018834 | MATR3   | 3410 | 3538 | 3.98630367246 |
| NM_018834 | MATR3   | 317  | 626  | 6.04519736151 |
| NM_018834 | MATR3   | 3546 | 3672 | 4.98630367246 |
| NM_018834 | MATR3   | 2468 | 2778 | 5.98630367246 |
| NM_018834 | MATR3   | 1999 | 2350 | 5.79365859452 |
| NM_015511 | C20orf4 | 861  | 910  | 8.94096291404 |
| NM_015510 | DHRS7B  | 1089 | 1202 | 8.64049945742 |
| NM_015510 | DHRS7B  | 364  | 466  | 10.2254619581 |
| NM_015510 | DHRS7B  | 845  | 967  | 11.3409391756 |
| NM_015510 | DHRS7B  | 995  | 1052 | 7.64049945741 |
| NM_015510 | DHRS7B  | 475  | 584  | 9.64049945742 |
| NM_015510 | DHRS7B  | 71   | 355  | 11.2254619581 |
| NM_015510 | DHRS7B  | 649  | 744  | 10.6404994574 |
| NM_018838 | NDUFA12 | 105  | 186  | 4.45705409845 |
| NM_018838 | NDUFA12 | 193  | 429  | 5.87209159773 |
| NM_018838 | NDUFA12 | 24   | 96   | 3.87191784741 |
| NM_002428 | MMP15   | 1557 | 1596 | 8.83254964762 |
| NM_002428 | MMP15   | 1667 | 1730 | 9.09558405346 |
| NM_002428 | MMP15   | 3742 | 3834 | 8.09558405346 |
| NM_002428 | MMP15   | 4237 | 4287 | 7.51062155274 |



|              |         |      |      |               |
|--------------|---------|------|------|---------------|
| NM_002428    | MMP15   | 2559 | 2664 | 9.09558405346 |
| NM_002428    | MMP15   | 4144 | 4227 | 9.09558405346 |
| NM_002428    | MMP15   | 756  | 829  | 6.51062155274 |
| NM_002428    | MMP15   | 2107 | 2156 | 8.51062154519 |
| NM_002428    | MMP15   | 3330 | 3391 | 8.09541030314 |
| NM_002428    | MMP15   | 2512 | 2541 | 7.50660395257 |
| NM_002428    | MMP15   | 1181 | 1241 | 7.51062131682 |
| NM_002428    | MMP15   | 1520 | 1552 | 6.51061482169 |
| NM_002428    | MMP15   | 2165 | 2226 | 8.51062155252 |
| NM_002428    | MMP15   | 4011 | 4114 | 8.83254964763 |
| NM_002428    | MMP15   | 2413 | 2470 | 7.51062155274 |
| NM_002428    | MMP15   | 2272 | 2317 | 8.09558381754 |
| NM_002428    | MMP15   | 1051 | 1158 | 8.51062155274 |
| NM_002428    | MMP15   | 391  | 519  | 8.83254964763 |
| NM_002428    | MMP15   | 1245 | 1465 | 9.3179764748  |
| NM_002428    | MMP15   | 3113 | 3237 | 9.97005317138 |
| NM_002428    | MMP15   | 1748 | 1895 | 6.51062155274 |
| NM_002428    | MMP15   | 934  | 1017 | 8.09558404591 |
| NM_002428    | MMP15   | 2787 | 2892 | 8.09558405346 |
| NM_019613    | WDR45L  | 413  | 474  | 4.14499624758 |
| NM_019613    | WDR45L  | 1523 | 1585 | 2.56003351094 |
| NM_019616    | F7      | 385  | 464  | 7.41068271685 |
| NM_019616    | F7      | 2172 | 2233 | 8.73261081174 |
| NM_019616    | F7      | 666  | 706  | 6.99547146726 |
| NM_019616    | F7      | 714  | 847  | 7.41068271685 |
| NM_019616    | F7      | 2275 | 2337 | 6.41050896654 |
| NM_019616    | F7      | 261  | 302  | 6.41050896654 |
| NM_019616    | F7      | 1738 | 1802 | 7.73261081174 |
| NM_019616    | F7      | 930  | 1003 | 6.99564521003 |
| NM_019616    | F7      | 852  | 917  | 5.40666511668 |
| NM_019616    | F7      | 83   | 135  | 6.99563848652 |
| NM_019616    | F7      | 1059 | 1133 | 5.4106827093  |
| NM_052848    | CCDC97  | 1360 | 1421 | 7.82502851918 |
| NM_052848    | CCDC97  | 1744 | 1889 | 9.63238344879 |
| NM_001136199 | GRAMD1A | 368  | 465  | 4.65885965469 |
| NM_001136199 | GRAMD1A | 2210 | 2256 | 4.65885292364 |
| NM_001136199 | GRAMD1A | 1221 | 1317 | 6.98078774958 |
| NM_001136199 | GRAMD1A | 2404 | 2469 | 4.65885964714 |
| NM_001136199 | GRAMD1A | 641  | 714  | 5.57472044531 |
| NM_001136199 | GRAMD1A | 1578 | 1664 | 4.65885965469 |
| NM_001136199 | GRAMD1A | 484  | 524  | 4.57472044531 |
| NM_001136199 | GRAMD1A | 1670 | 1742 | 5.65885965469 |
| NM_001136199 | GRAMD1A | 1856 | 1913 | 5.65885965469 |
| NM_001136199 | GRAMD1A | 1494 | 1549 | 5.65885941877 |
| NM_001136199 | GRAMD1A | 2293 | 2362 | 6.23980455524 |
| NM_001136196 | TNPO2   | 3016 | 3051 | 8.57673740545 |
| NM_001136196 | TNPO2   | 1770 | 1851 | 5.99177490473 |
| NM_001136196 | TNPO2   | 4229 | 4293 | 6.99177490473 |
| NM_001136196 | TNPO2   | 232  | 346  | 5.99177489718 |
| NM_001136196 | TNPO2   | 3348 | 3402 | 5.99177466881 |

|              |          |      |      |                   |
|--------------|----------|------|------|-------------------|
| NM_001136196 | TNP02    | 806  | 873  | 7.57673067439     |
| NM_001136196 | TNP02    | 4817 | 4935 | 7.99177490473     |
| NM_001136196 | TNP02    | 2062 | 2143 | 5.99177489718     |
| NM_001136196 | TNP02    | 1244 | 1329 | 8.31370299961     |
| NM_001136196 | TNP02    | 2688 | 2845 | 8.57673740545     |
| NM_001136196 | TNP02    | 939  | 1060 | 7.57673740545     |
| NM_001136196 | TNP02    | 1862 | 1963 | 7.57673740545     |
| NM_001136196 | TNP02    | 2909 | 3001 | 5.99160115441     |
| NM_052844    | WDR34    | 612  | 672  | 10.4804285993     |
| NM_052844    | WDR34    | 1157 | 1203 | 9.81132689671     |
| NM_052844    | WDR34    | 697  | 733  | 9.89529235578     |
| NM_052844    | WDR34    | 1397 | 1455 | 10.4804283709     |
| NM_052844    | WDR34    | 981  | 1045 | 9.89546610609     |
| NM_052844    | WDR34    | 1466 | 1535 | 9.8954661061      |
| NM_052844    | WDR34    | 520  | 591  | 8.8954661061      |
| NM_052844    | WDR34    | 443  | 512  | 9.89529235578     |
| NM_052844    | WDR34    | 813  | 948  | 10.8954661061     |
| NM_052844    | WDR34    | 1281 | 1393 | 11.217394201      |
| NM_001136191 | KANK2    | 4879 | 4921 | 9.95626048524     |
| NM_001136191 | KANK2    | 4614 | 4654 | 9.96027807786     |
| NM_001136191 | KANK2    | 2764 | 2817 | 8.96010433509     |
| NM_001136191 | KANK2    | 2291 | 2379 | 9.9602780854      |
| NM_001136191 | KANK2    | 1888 | 1947 | 8.95626048524     |
| NM_001136191 | KANK2    | 2817 | 2853 | 10.541222986      |
| NM_001136191 | KANK2    | 658  | 734  | 9.96027808541     |
| NM_001136191 | KANK2    | 292  | 324  | 8.87613887603     |
| NM_001136191 | KANK2    | 223  | 279  | 8.95626048524     |
| NM_001136191 | KANK2    | 3281 | 3357 | 11.2822061803     |
| NM_001136191 | KANK2    | 2501 | 2561 | 11.2822061727     |
| NM_001136191 | KANK2    | 328  | 377  | 8.95626048524     |
| NM_001136191 | KANK2    | 4655 | 4705 | 8.96027808519     |
| NM_001136191 | KANK2    | 466  | 546  | 8.9602780854      |
| NM_001136191 | KANK2    | 2605 | 2675 | 9.96027807786     |
| NM_001136191 | KANK2    | 4354 | 4407 | 9.95626048524     |
| NM_001136191 | KANK2    | 562  | 628  | 8.95626048524     |
| NM_001136191 | KANK2    | 2122 | 2209 | 10.5452403502     |
| NM_001136191 | KANK2    | 5004 | 5119 | 11.5452405861     |
| NM_001136191 | KANK2    | 3191 | 3255 | 10.5452405861     |
| NM_001136191 | KANK2    | 3410 | 3484 | 9.96027807786     |
| NM_001076786 | QSER1    | 5488 | 5553 | 7.09409306521     |
| NM_001076786 | QSER1    | 6469 | 6528 | 7.013971456       |
| NM_001076786 | QSER1    | 335  | 423  | 8.09811066516     |
| NM_001076786 | QSER1    | 1836 | 1873 | 7.013971456       |
| NM_001076786 | QSER1    | 223  | 311  | 8.09811065783     |
| NM_177533    | NUDT14   | 207  | 274  | 10.985129712      |
| NM_170746    | C11orf31 |      | 757  | 790 5.78513737274 |
| NM_177538    | CYP20A1  | 967  | 1051 | 9.68141298568     |
| NM_177538    | CYP20A1  | 801  | 842  | 10.0033343495     |
| NM_177538    | CYP20A1  | 1757 | 1802 | 9.26637548618     |
| NM_177538    | CYP20A1  | 849  | 894  | 9.26637525048     |

|              |         |      |      |               |
|--------------|---------|------|------|---------------|
| NM_177538    | CYP20A1 | 1598 | 1661 | 9.2663754864  |
| NM_177538    | CYP20A1 | 2588 | 2650 | 7.6773953855  |
| NM_177538    | CYP20A1 | 1527 | 1589 | 8.68141297813 |
| NM_177538    | CYP20A1 | 616  | 665  | 8.59727377629 |
| NM_177538    | CYP20A1 | 8297 | 8345 | 7.68123923536 |
| NM_177538    | CYP20A1 | 1947 | 2003 | 8.6773953855  |
| NM_177538    | CYP20A1 | 7994 | 8039 | 8.6773953855  |
| NM_177538    | CYP20A1 | 1840 | 1917 | 9.26637525048 |
| NM_177538    | CYP20A1 | 4685 | 4761 | 7.6773953855  |
| NM_177538    | CYP20A1 | 1142 | 1258 | 10.2663754864 |
| NM_177538    | CYP20A1 | 1302 | 1360 | 7.68140625462 |
| NM_177538    | CYP20A1 | 1409 | 1517 | 10.0033410806 |
| NM_001003714 | ATP5J2  | 89   | 196  | 7.57741582509 |
| NM_001003714 | ATP5J2  | 198  | 332  | 6.57741582509 |
| NM_183008    | UBXN11  | 1506 | 1556 | 7.10585042401 |
| NM_183008    | UBXN11  | 1202 | 1293 | 8.10986802417 |
| NM_138335    | GNPDA2  | 844  | 895  | 7.79739590414 |
| NM_138335    | GNPDA2  | 663  | 711  | 7.79739590414 |
| NM_138335    | GNPDA2  | 388  | 429  | 8.79756965445 |
| NM_138335    | GNPDA2  | 570  | 622  | 8.79756292341 |
| NM_138335    | GNPDA2  | 133  | 284  | 8.79756965446 |
| NM_183006    | DLGAP4  | 2449 | 2508 | 5.42873068806 |
| NM_183006    | DLGAP4  | 1292 | 1368 | 5.42890443837 |
| NM_183006    | DLGAP4  | 36   | 94   | 5.4248868382  |
| NM_183006    | DLGAP4  | 2547 | 2601 | 5.42889770732 |
| NM_183006    | DLGAP4  | 3295 | 3366 | 4.42890420246 |
| NM_183006    | DLGAP4  | 531  | 630  | 6.0138669391  |
| NM_183006    | DLGAP4  | 682  | 776  | 4.42890420246 |
| NM_183006    | DLGAP4  | 430  | 516  | 4.42890443837 |
| NM_183006    | DLGAP4  | 2200 | 2265 | 5.4248868382  |
| NM_138330    | ZNF675  | 371  | 393  | 9.44467990571 |
| NM_001040108 | MLH3    | 3536 | 3600 | 8.9879651212  |
| NM_006430    | CCT4    | 43   | 106  | 2.00910202092 |
| NM_006430    | CCT4    | 1671 | 1926 | 6.70954847012 |
| NM_006430    | CCT4    | 1958 | 2033 | 4.33103684686 |
| NM_006430    | CCT4    | 727  | 874  | 5.17903375342 |
| NM_006430    | CCT4    | 492  | 691  | 6.17903375342 |
| NM_006430    | CCT4    | 934  | 1053 | 4.5940712527  |
| NM_006430    | CCT4    | 1072 | 1620 | 7.81646367403 |
| NM_006430    | CCT4    | 289  | 407  | 4.5940712527  |
| NM_007215    | POLG2   | 1247 | 1293 | 6.0319517312  |
| NM_007215    | POLG2   | 512  | 570  | 5.94781925287 |
| NM_001216    | CA9     | 1470 | 1524 | 6.53000213869 |
| NM_001216    | CA9     | 48   | 147  | 8.85193696463 |
| NM_001216    | CA9     | 1389 | 1446 | 7.53000886973 |
| NM_001216    | CA9     | 1107 | 1211 | 9.53000886974 |
| NM_001216    | CA9     | 572  | 632  | 7.53000863382 |
| NM_001216    | CA9     | 888  | 1103 | 10.4368994653 |
| NM_001216    | CA9     | 635  | 775  | 8.53000886974 |
| NM_001216    | CA9     | 307  | 406  | 8.53000886973 |

|              |        |      |      |               |
|--------------|--------|------|------|---------------|
| NM_001211    | BUB1B  | 707  | 776  | 6.94348178585 |
| NM_001211    | BUB1B  | 1985 | 2062 | 7.68044738001 |
| NM_001211    | BUB1B  | 2637 | 2687 | 6.27438008329 |
| NM_001211    | BUB1B  | 2984 | 3044 | 5.35851256162 |
| NM_001211    | BUB1B  | 2721 | 2788 | 5.35851256162 |
| NM_001211    | BUB1B  | 3537 | 3595 | 5.35851928513 |
| NM_001211    | BUB1B  | 2088 | 2309 | 8.68044738756 |
| NM_001211    | BUB1B  | 1914 | 1985 | 6.27438008329 |
| NM_001212    | C1QBP  | 969  | 1044 | 2.56807344203 |
| NM_001212    | C1QBP  | 502  | 590  | 3.24614534715 |
| NM_001212    | C1QBP  | 881  | 960  | 2.56807344203 |
| NM_001212    | C1QBP  | 387  | 457  | 1.83110784787 |
| NM_001212    | C1QBP  | 457  | 491  | 1.24613861609 |
| NM_001212    | C1QBP  | 232  | 338  | 3.24614534715 |
| NM_001212    | C1QBP  | 62   | 153  | 1.83110784787 |
| NM_001212    | C1QBP  | 595  | 880  | 5.00103284931 |
| NM_001003897 | MANBAL | 419  | 504  | 7.35133916771 |
| NM_001003897 | MANBAL | 108  | 222  | 7.35133917526 |
| NM_001163940 | PYGL   | 164  | 214  | 4.38087219089 |
| NM_001163940 | PYGL   | 453  | 523  | 3.38087868602 |
| NM_001163940 | PYGL   | 2468 | 2520 | 3.38087219089 |
| NM_001163940 | PYGL   | 1047 | 1103 | 4.96566767234 |
| NM_001163940 | PYGL   | 731  | 854  | 5.38087892194 |
| NM_001163940 | PYGL   | 1255 | 1313 | 3.37686132177 |
| NM_001163940 | PYGL   | 1413 | 1522 | 3.38087868602 |
| NM_001163940 | PYGL   | 2090 | 2167 | 3.38087219089 |
| NM_022167    | XYLT2  | 1281 | 1347 | 9.14555187826 |
| NM_030912    | TRIM8  | 1507 | 1576 | 5.80027929375 |
| NM_030912    | TRIM8  | 1907 | 1997 | 5.38524179447 |
| NM_030912    | TRIM8  | 119  | 199  | 5.80027929353 |
| NM_030912    | TRIM8  | 682  | 819  | 5.38524179447 |
| NM_030912    | TRIM8  | 830  | 870  | 3.80010554343 |
| NM_030912    | TRIM8  | 968  | 1136 | 6.12220738864 |
| NM_030912    | TRIM8  | 2005 | 2114 | 5.80027929375 |
| NM_030912    | TRIM8  | 2581 | 2700 | 3.80027929375 |
| NM_030912    | TRIM8  | 2188 | 2293 | 7.12220738864 |
| NM_021129    | PPA1   | 364  | 401  | 5.02881681791 |
| NM_021129    | PPA1   | 609  | 698  | 7.14429403533 |
| NM_021129    | PPA1   | 418  | 608  | 7.83617173997 |
| NM_021129    | PPA1   | 179  | 325  | 6.25120923925 |
| NM_021129    | PPA1   | 721  | 1112 | 8.53131715844 |
| NM_021129    | PPA1   | 16   | 162  | 5.44385431719 |
| NM_030917    | FIP1L1 | 1287 | 1364 | 7.13067298211 |
| NM_030917    | FIP1L1 | 624  | 669  | 6.808744887   |
| NM_030917    | FIP1L1 | 1391 | 1472 | 7.13067298211 |
| NM_030917    | FIP1L1 | 874  | 925  | 4.72460567784 |
| NM_030917    | FIP1L1 | 0    | 85   | 4.80874488722 |
| NM_030917    | FIP1L1 | 358  | 460  | 7.39370738795 |
| NM_030917    | FIP1L1 | 1691 | 1768 | 4.80472728705 |
| NM_030917    | FIP1L1 | 678  | 808  | 7.39370738795 |

|              |        |      |      |               |
|--------------|--------|------|------|---------------|
| NM_030917    | FIP1L1 | 1107 | 1235 | 7.39370738795 |
| NM_030914    | URM1   | 132  | 210  | 7.62534710611 |
| NM_030914    | URM1   | 1089 | 1146 | 4.62534710611 |
| NM_030914    | URM1   | 230  | 298  | 6.21030960683 |
| NM_030918    | SNX27  | 6349 | 6425 | 8.11706260876 |
| NM_030918    | SNX27  | 176  | 233  | 7.03293013043 |
| NM_030918    | SNX27  | 2905 | 2961 | 8.70202510948 |
| NM_030918    | SNX27  | 1826 | 1860 | 7.03293013043 |
| NM_030918    | SNX27  | 5653 | 5760 | 9.11706933981 |
| NM_030918    | SNX27  | 3161 | 3230 | 9.11305173964 |
| NM_030919    | FAM83D | 1975 | 2031 | 6.87119013169 |
| NM_030919    | FAM83D | 616  | 667  | 6.86717926257 |
| NM_030919    | FAM83D | 703  | 808  | 6.87119686274 |
| NM_030919    | FAM83D | 1674 | 1725 | 5.28221676185 |
| NM_030919    | FAM83D | 2301 | 2354 | 5.28221676185 |
| NM_030919    | FAM83D | 1205 | 1248 | 6.20209515264 |
| NM_030919    | FAM83D | 1419 | 1495 | 6.87119013169 |
| NM_030919    | FAM83D | 1529 | 1667 | 6.87119686274 |
| NM_020135    | WRNIP1 | 708  | 760  | 3.57437383679 |
| NM_020135    | WRNIP1 | 1179 | 1297 | 5.57839143697 |
| NM_020135    | WRNIP1 | 2324 | 2380 | 5.16334720663 |
| NM_020135    | WRNIP1 | 1468 | 1523 | 4.49425222758 |
| NM_020135    | WRNIP1 | 1523 | 1582 | 5.16318018737 |
| NM_020135    | WRNIP1 | 2243 | 2303 | 4.57839142942 |
| NM_198584    | CA13   | 1492 | 1527 | 10.3165866434 |
| NM_002853    | RAD1   | 319  | 361  | 8.65692053215 |
| NM_002853    | RAD1   | 1087 | 1185 | 8.74105974154 |
| NM_001710    | CFB    | 260  | 348  | 1.87731155892 |
| NM_001710    | CFB    | 1959 | 2042 | 4.68466648097 |
| NM_001710    | CFB    | 2317 | 2389 | 1.87731155869 |
| NM_001710    | CFB    | 1234 | 1273 | 1.877311323   |
| NM_001710    | CFB    | 853  | 955  | 3.46227405209 |
| NM_001710    | CFB    | 2411 | 2465 | 4.1992396538  |
| NM_001710    | CFB    | 1792 | 1929 | 5.57775127706 |
| NM_001710    | CFB    | 642  | 714  | 4.46227405964 |
| NM_001710    | CFB    | 1360 | 1423 | 3.46227405209 |
| NM_001710    | CFB    | 426  | 629  | 5.33674317755 |
| NM_001710    | CFB    | 1607 | 1781 | 5.68466648097 |
| NM_001710    | CFB    | 989  | 1097 | 4.1992396538  |
| NM_001710    | CFB    | 2153 | 2218 | 4.1992396538  |
| NM_001710    | CFB    | 2513 | 2617 | 3.46227405964 |
| NM_001710    | CFB    | 1436 | 1556 | 5.1992396538  |
| NM_001005751 | FAM21A | 876  | 919  | 6.50551935187 |
| NM_001005751 | FAM21A | 2321 | 2364 | 6.50551285673 |
| NM_001005751 | FAM21A | 1158 | 1215 | 6.50551958778 |
| NM_001005751 | FAM21A | 3502 | 3545 | 7.00634287912 |
| NM_001005751 | FAM21A | 4189 | 4252 | 7.08646448833 |
| NM_001005751 | FAM21A | 2637 | 2695 | 5.50150198761 |
| NM_001005751 | FAM21A | 2373 | 2507 | 7.82744768267 |
| NM_001005751 | FAM21A | 4032 | 4093 | 6.50551935187 |

|              |         |      |      |                |
|--------------|---------|------|------|----------------|
| NM_001005751 | FAM21A  | 924  | 1015 | 7.09030833819  |
| NM_001005751 | FAM21A  | 1476 | 1527 | 7.09048208828  |
| NM_001005751 | FAM21A  | 1362 | 1409 | 5.4213803784   |
| NM_001005751 | FAM21A  | 239  | 362  | 7.50551958779  |
| NM_001005751 | FAM21A  | 4110 | 4147 | 6.4213803784   |
| NM_001005751 | FAM21A  | 470  | 565  | 7.82744768267  |
| NM_001005751 | FAM21A  | 2189 | 2306 | 7.09048208851  |
| NM_001005751 | FAM21A  | 653  | 787  | 8.09048208851  |
| NM_001005751 | FAM21A  | 2071 | 2186 | 7.09048185259  |
| NM_001005751 | FAM21A  | 2921 | 3122 | 8.31287450984  |
| NM_001005751 | FAM21A  | 2713 | 2829 | 7.82744768267  |
| NM_007212    | RNF2    | 994  | 1040 | 4.96869649991  |
| NM_017619    | RNPC3   | 1720 | 1783 | 7.92008452908  |
| NM_017619    | RNPC3   | 1458 | 1504 | 7.8359453197   |
| NM_017617    | NOTCH1  | 8960 | 9021 | 13.0010309926  |
| NM_017617    | NOTCH1  | 2280 | 2350 | 13.0050418617  |
| NM_017617    | NOTCH1  | 2213 | 2261 | 13.0010309926  |
| NM_017617    | NOTCH1  | 6044 | 6116 | 13.0050483568  |
| NM_017614    | BHMT2   | 1684 | 1771 | 6.858136778    |
| NM_017614    | BHMT2   | 128  | 201  | 6.27317426972  |
| NM_017614    | BHMT2   | 599  | 649  | 5.27316754622  |
| NM_017614    | BHMT2   | 2539 | 2604 | 6.2691566771   |
| NM_017614    | BHMT2   | 1405 | 1452 | 5.2691566771   |
| NM_017614    | BHMT2   | 454  | 515  | 6.27317404136  |
| NM_017614    | BHMT2   | 2196 | 2279 | 5.27317426972  |
| NM_017615    | NSMCE4A | 1063 | 1181 | 3.27255481101  |
| NM_017612    | ZCCHC8  | 1824 | 1894 | 5.56376941749  |
| NM_017612    | ZCCHC8  | 2605 | 2666 | 5.47963693916  |
| NM_017612    | ZCCHC8  | 1163 | 1261 | 6.56376941749  |
| NM_017613    | DONSON  | 1932 | 1972 | 7.4355861363   |
| NM_017613    | DONSON  | 413  | 509  | 9.43960373647  |
| NM_017613    | DONSON  | 1541 | 1746 | 9.76153183136  |
| NM_017613    | DONSON  | 1347 | 1463 | 9.02456623719  |
| NM_017613    | DONSON  | 613  | 900  | 11.5270665777  |
| NM_017610    | RNF111  | 3373 | 3442 | 7.19718161079  |
| NM_012208    | HARS2   | 1352 | 1428 | 7.35455342929  |
| NM_012208    | HARS2   | 593  | 645  | 5.76941717826  |
| NM_012208    | HARS2   | 1486 | 1560 | 5.7655733284   |
| NM_012208    | HARS2   | 492  | 564  | 5.7655733284   |
| NM_012208    | HARS2   | 1693 | 1768 | 7.35454669824  |
| NM_001711    | BGN     | 1880 | 2013 | 9.98934537712  |
| NM_001711    | BGN     | 2024 | 2128 | 8.40438287618  |
| NM_004483    | GCSH    | 205  | 244  | 0.722190281247 |
| NM_004483    | GCSH    | 454  | 528  | 2.3071592771   |
| NM_004483    | GCSH    | 278  | 450  | 3.04412510719  |
| NM_004482    | GALNT3  | 1969 | 2074 | 13.67121685    |
| NM_004482    | GALNT3  | 1668 | 1754 | 13.478571772   |
| NM_004482    | GALNT3  | 1565 | 1663 | 13.9931449449  |
| NM_004482    | GALNT3  | 2320 | 2391 | 12.993144709   |
| NM_004482    | GALNT3  | 775  | 837  | 12.2561793507  |

|           |        |      |      |               |
|-----------|--------|------|------|---------------|
| NM_004482 | GALNT3 | 2117 | 2173 | 12.2561793507 |
| NM_004482 | GALNT3 | 2948 | 2991 | 10.6671992498 |
| NM_004482 | GALNT3 | 697  | 753  | 12.67121685   |
| NM_004482 | GALNT3 | 2701 | 2748 | 10.6712101189 |
| NM_004482 | GALNT3 | 2080 | 2109 | 10.6710430997 |
| NM_004482 | GALNT3 | 1363 | 1420 | 13.478571772  |
| NM_004482 | GALNT3 | 436  | 477  | 12.2560056004 |
| NM_004482 | GALNT3 | 1507 | 1563 | 12.2561793507 |
| NM_004482 | GALNT3 | 2874 | 2945 | 11.5870776406 |
| NM_004482 | GALNT3 | 622  | 688  | 12.6712168498 |
| NM_004482 | GALNT3 | 376  | 432  | 11.6671992498 |
| NM_004482 | GALNT3 | 2408 | 2469 | 11.6712101189 |
| NM_004482 | GALNT3 | 842  | 951  | 12.67121685   |
| NM_004482 | GALNT3 | 1825 | 1968 | 14.3716565681 |
| NM_004482 | GALNT3 | 516  | 614  | 12.2561793507 |
| NM_004482 | GALNT3 | 1111 | 1208 | 13.2561793507 |
| NM_004482 | GALNT3 | 960  | 1107 | 14.9191443634 |
| NM_004482 | GALNT3 | 1209 | 1359 | 14.478571772  |
| NM_004481 | GALNT2 | 4355 | 4416 | 3.84459498906 |
| NM_004481 | GALNT2 | 3257 | 3325 | 6.16652307662 |
| NM_004481 | GALNT2 | 2878 | 2940 | 5.84459498906 |
| NM_004481 | GALNT2 | 4293 | 4332 | 3.84442123897 |
| NM_004481 | GALNT2 | 87   | 146  | 5.84459498906 |
| NM_004481 | GALNT2 | 1214 | 1265 | 3.84459498906 |
| NM_004481 | GALNT2 | 329  | 383  | 4.84057738911 |
| NM_004481 | GALNT2 | 412  | 462  | 3.7604557799  |
| NM_004481 | GALNT2 | 1913 | 1991 | 3.84459498929 |
| NM_004481 | GALNT2 | 2277 | 2373 | 6.65194991134 |
| NM_004481 | GALNT2 | 517  | 550  | 4.7604557799  |
| NM_004481 | GALNT2 | 2645 | 2730 | 5.42955749001 |
| NM_004481 | GALNT2 | 4159 | 4286 | 4.84459498929 |
| NM_004481 | GALNT2 | 598  | 714  | 6.84459498929 |
| NM_004481 | GALNT2 | 973  | 1184 | 7.16652308417 |
| NM_004481 | GALNT2 | 1836 | 1906 | 3.84459498929 |
| NM_004481 | GALNT2 | 1403 | 1605 | 7.54503470743 |
| NM_004481 | GALNT2 | 3813 | 3905 | 6.42955749001 |
| NM_004481 | GALNT2 | 3735 | 3803 | 4.84459498906 |
| NM_004481 | GALNT2 | 2052 | 2167 | 4.84459498929 |
| NM_004481 | GALNT2 | 3076 | 3177 | 5.84459498929 |
| NM_004481 | GALNT2 | 1605 | 1714 | 6.16652308417 |
| NM_004481 | GALNT2 | 732  | 953  | 7.54503470743 |
| NM_012201 | GLG1   | 3661 | 3733 | 3.73125900965 |
| NM_012201 | GLG1   | 3231 | 3306 | 5.73143275997 |
| NM_012201 | GLG1   | 7782 | 7850 | 4.31638852964 |
| NM_012201 | GLG1   | 3613 | 3661 | 2.73143275242 |
| NM_012201 | GLG1   | 7159 | 7210 | 2.73125900965 |
| NM_012201 | GLG1   | 6376 | 6404 | 2.64729355059 |
| NM_012201 | GLG1   | 3153 | 3225 | 5.05336085486 |
| NM_012201 | GLG1   | 659  | 696  | 2.73143252405 |
| NM_012201 | GLG1   | 2769 | 2806 | 2.73143275975 |

|           |         |       |       |               |
|-----------|---------|-------|-------|---------------|
| NM_012201 | GLG1    | 3736  | 3801  | 3.7274151598  |
| NM_012201 | GLG1    | 5813  | 5857  | 2.64729355059 |
| NM_012201 | GLG1    | 6633  | 6666  | 2.73142602892 |
| NM_012201 | GLG1    | 3315  | 3361  | 4.31622151038 |
| NM_012201 | GLG1    | 1154  | 1287  | 6.31639526069 |
| NM_012201 | GLG1    | 40    | 115   | 4.73143275997 |
| NM_012201 | GLG1    | 1055  | 1109  | 3.64729355059 |
| NM_012201 | GLG1    | 3375  | 3613  | 7.63832335558 |
| NM_012201 | GLG1    | 2454  | 2625  | 6.19086437861 |
| NM_012201 | GLG1    | 6766  | 6830  | 2.73143275975 |
| NM_012201 | GLG1    | 1315  | 1745  | 8.5127924735  |
| NM_012201 | GLG1    | 4244  | 4382  | 4.73143275997 |
| NM_012201 | GLG1    | 2631  | 2761  | 5.05336085486 |
| NM_012201 | GLG1    | 2847  | 3110  | 7.12375018275 |
| NM_012201 | GLG1    | 4786  | 4843  | 2.64729355059 |
| NM_012201 | GLG1    | 2103  | 2440  | 7.81889560122 |
| NM_012201 | GLG1    | 377   | 658   | 7.12375018275 |
| NM_012201 | GLG1    | 1756  | 2100  | 7.73143275997 |
| NM_012201 | GLG1    | 728   | 1011  | 7.43187247811 |
| NM_004487 | GOLGB1  | 8405  | 8462  | 4.93869227431 |
| NM_004487 | GOLGB1  | 9831  | 9860  | 3.93869227431 |
| NM_004487 | GOLGB1  | 9697  | 9743  | 3.94270963856 |
| NM_004487 | GOLGB1  | 9346  | 9406  | 3.94270314343 |
| NM_004487 | GOLGB1  | 181   | 243   | 5.44353316582 |
| NM_004487 | GOLGB1  | 10110 | 10158 | 3.93869227431 |
| NM_004487 | GOLGB1  | 10159 | 10215 | 5.52365477503 |
| NM_004487 | GOLGB1  | 9863  | 10003 | 6.26463796937 |
| NM_004487 | GOLGB1  | 6236  | 6303  | 3.93869227431 |
| NM_004487 | GOLGB1  | 5760  | 5800  | 4.94253612416 |
| NM_004487 | GOLGB1  | 8853  | 8907  | 4.94270314343 |
| NM_004487 | GOLGB1  | 1287  | 1344  | 5.52749862488 |
| NM_004487 | GOLGB1  | 9592  | 9656  | 5.52365477503 |
| NM_012207 | HNRNPH3 | 1389  | 1466  | 5.35368306003 |
| NM_012207 | HNRNPH3 | 1328  | 1378  | 2.76872055176 |
| NM_012207 | HNRNPH3 | 1261  | 1326  | 4.76872055909 |
| NM_012207 | HNRNPH3 | 259   | 333   | 4.35368306003 |
| NM_012207 | HNRNPH3 | 460   | 524   | 2.76871382826 |
| NM_012207 | HNRNPH3 | 130   | 247   | 5.0906486542  |
| NM_012207 | HNRNPH3 | 1584  | 1679  | 2.76872055176 |
| NM_012207 | HNRNPH3 | 544   | 802   | 5.76872055931 |
| NM_012207 | HNRNPH3 | 901   | 986   | 3.76872055176 |
| NM_012207 | HNRNPH3 | 1003  | 1187  | 5.35368306003 |
| NM_012204 | GTF3C4  | 1648  | 1700  | 8.29273946    |
| NM_012204 | GTF3C4  | 1074  | 1121  | 7.20877400094 |
| NM_018396 | METTL2B | 296   | 355   | 7.02153055724 |
| NM_018396 | METTL2B | 407   | 472   | 7.60649305796 |
| NM_018396 | METTL2B | 674   | 760   | 9.02153055724 |
| NM_018396 | METTL2B | 587   | 673   | 8.82888547929 |
| NM_006939 | SOS2    | 2490  | 2540  | 6.00711108578 |
| NM_006939 | SOS2    | 582   | 620   | 7.00711108578 |



|           |        |       |       |                 |
|-----------|--------|-------|-------|-----------------|
| NM_006938 | SNRPD1 | 377   | 422   | 2.46264380103   |
| NM_006938 | SNRPD1 | 1114  | 1149  | 2.54276541024   |
| NM_006938 | SNRPD1 | 83    | 342   | 6.07034496647   |
| NM_133452 | RAVER1 | 3367  | 3440  | 8.2490787104    |
| NM_133452 | RAVER1 | 1843  | 1940  | 8.2490787104    |
| NM_133452 | RAVER1 | 648   | 722   | 7.66411620968   |
| NM_133452 | RAVER1 | 2428  | 2499  | 9.2490787104    |
| NM_133452 | RAVER1 | 3249  | 3339  | 9.2490787104    |
| NM_133452 | RAVER1 | 3202  | 3248  | 8.24506111023   |
| NM_133452 | RAVER1 | 1607  | 1689  | 7.66411620968   |
| NM_133452 | RAVER1 | 289   | 443   | 10.1235478283   |
| NM_133452 | RAVER1 | 1086  | 1180  | 8.24907871018   |
| NM_133452 | RAVER1 | 1511  | 1560  | 6.66394245936   |
| NM_133452 | RAVER1 | 722   | 862   | 9.2490787104    |
| NM_133452 | RAVER1 | 2290  | 2428  | 7.66411620968   |
| NM_133452 | RAVER1 | 911   | 980   | 6.66411620968   |
| NM_133452 | RAVER1 | 2623  | 2830  | 9.83404121112   |
| NM_000038 | APC    | 1876  | 1929  | 8.01954319296   |
| NM_000038 | APC    | 1560  | 1626  | 10.0155323238   |
| NM_000038 | APC    | 1752  | 1792  | 8.01553232384   |
| NM_000038 | APC    | 2370  | 2414  | 8.93541071463   |
| NM_000038 | APC    | 1387  | 1463  | 8.93541071463   |
| NM_000039 | APOA1  | 86    | 282   | -0.774101757652 |
| NM_006930 | SKP1   | 1349  | 1428  | 5.54181625006   |
| NM_006930 | SKP1   | 1555  | 1654  | 4.27878184423   |
| NM_006930 | SKP1   | 1481  | 1547  | 3.54181625005   |
| NM_006930 | SKP1   | 143   | 327   | 5.7642086714    |
| NM_006930 | SKP1   | 368   | 581   | 5.65729346748   |
| NM_006933 | SLC5A3 | 5242  | 5280  | 7.07937712617   |
| NM_006933 | SLC5A3 | 10611 | 10681 | 8.07937712617   |
| NM_006933 | SLC5A3 | 3658  | 3744  | 8.1635096045    |
| NM_006933 | SLC5A3 | 2479  | 2537  | 7.16351609964   |
| NM_006933 | SLC5A3 | 542   | 618   | 8.16351633555   |
| NM_006933 | SLC5A3 | 1104  | 1160  | 9.16351633555   |
| NM_006933 | SLC5A3 | 2258  | 2308  | 9.16351609964   |
| NM_006933 | SLC5A3 | 1619  | 1727  | 10.9708712576   |
| NM_006933 | SLC5A3 | 7913  | 7965  | 7.07937712617   |
| NM_006933 | SLC5A3 | 11105 | 11154 | 8.66433962689   |
| NM_006933 | SLC5A3 | 7049  | 7129  | 7.1635096045    |
| NM_006933 | SLC5A3 | 5823  | 5907  | 8.15949873538   |
| NM_006933 | SLC5A3 | 435   | 527   | 8.74847883628   |
| NM_006933 | SLC5A3 | 902   | 1101  | 11.333441337    |
| NM_006933 | SLC5A3 | 1873  | 1958  | 7.16351633555   |
| NM_006933 | SLC5A3 | 215   | 317   | 9.48544443044   |
| NM_006933 | SLC5A3 | 8077  | 8138  | 7.07937712617   |
| NM_006933 | SLC5A3 | 3086  | 3132  | 8.74830508596   |
| NM_006933 | SLC5A3 | 1960  | 1998  | 8.74830508596   |
| NM_006933 | SLC5A3 | 9233  | 9259  | 7.16334258524   |
| NM_006933 | SLC5A3 | 1323  | 1420  | 9.48544443044   |
| NM_006933 | SLC5A3 | 2368  | 2435  | 7.15949873538   |

|           |        |       |       |               |
|-----------|--------|-------|-------|---------------|
| NM_006933 | SLC5A3 | 8293  | 8333  | 7.07937712617 |
| NM_006933 | SLC5A3 | 7346  | 7402  | 7.15949873538 |
| NM_006933 | SLC5A3 | 2643  | 2744  | 10.4854444304 |
| NM_006933 | SLC5A3 | 10312 | 10396 | 7.15949873538 |
| NM_006933 | SLC5A3 | 9852  | 9939  | 8.16351633555 |
| NM_006933 | SLC5A3 | 1426  | 1566  | 10.4854444304 |
| NM_006933 | SLC5A3 | 625   | 801   | 9.97087125761 |
| NM_006933 | SLC5A3 | 2748  | 2829  | 7.16351633555 |
| NM_006933 | SLC5A3 | 2004  | 2239  | 10.333441337  |
| NM_006933 | SLC5A3 | 1732  | 1808  | 7.1635096045  |
| NM_000033 | ABCD1  | 1346  | 1393  | 7.7439621417  |
| NM_000033 | ABCD1  | 940   | 1012  | 8.32909166169 |
| NM_000033 | ABCD1  | 1694  | 1753  | 6.74413588447 |
| NM_000033 | ABCD1  | 2038  | 2113  | 7.7441356561  |
| NM_182715 | SYPL1  | 1617  | 1656  | 9.65490000197 |
| NM_182715 | SYPL1  | 1445  | 1543  | 10.0174768124 |
| NM_182715 | SYPL1  | 47    | 176   | 10.5479915291 |
| NM_182715 | SYPL1  | 845   | 945   | 9.84755181096 |
| NM_182715 | SYPL1  | 1545  | 1583  | 6.76341260158 |
| NM_182715 | SYPL1  | 952   | 1089  | 9.84755181096 |
| NM_182715 | SYPL1  | 1162  | 1246  | 7.84353421079 |
| NM_182715 | SYPL1  | 179   | 786   | 13.8919459303 |
| NM_182715 | SYPL1  | 1827  | 1926  | 9.16947990563 |
| NM_017921 | NPL0C4 | 3529  | 3571  | 6.26264783624 |
| NM_017921 | NPL0C4 | 1914  | 1960  | 6.17850862686 |
| NM_017921 | NPL0C4 | 3912  | 3960  | 7.84761033696 |
| NM_017921 | NPL0C4 | 1412  | 1508  | 7.84761033696 |
| NM_017921 | NPL0C4 | 3128  | 3175  | 5.25863023607 |
| NM_017921 | NPL0C4 | 2255  | 2320  | 6.84761033696 |
| NM_017921 | NPL0C4 | 3814  | 3887  | 7.58457593113 |
| NM_017921 | NPL0C4 | 4258  | 4369  | 5.26264783624 |
| NM_017921 | NPL0C4 | 2406  | 2474  | 6.26264783624 |
| NM_017921 | NPL0C4 | 710   | 755   | 6.26264110519 |
| NM_017921 | NPL0C4 | 505   | 559   | 5.26264782869 |
| NM_017921 | NPL0C4 | 3043  | 3123  | 6.26264110519 |
| NM_017921 | NPL0C4 | 3452  | 3518  | 7.26264110519 |
| NM_017921 | NPL0C4 | 382   | 490   | 6.84761033696 |
| NM_017921 | NPL0C4 | 2745  | 2812  | 5.26264110519 |
| NM_017921 | NPL0C4 | 3578  | 3690  | 8.58457593113 |
| NM_017921 | NPL0C4 | 1194  | 1297  | 7.84761033696 |
| NM_017921 | NPL0C4 | 1018  | 1178  | 7.84761033696 |
| NM_017921 | NPL0C4 | 1596  | 1835  | 8.26264783624 |
| NM_017921 | NPL0C4 | 821   | 997   | 8.43257283768 |
| NM_017921 | NPL0C4 | 582   | 667   | 7.26264783623 |
| NM_017921 | NPL0C4 | 300   | 357   | 5.26264783602 |
| NM_017921 | NPL0C4 | 1852  | 1909  | 6.26247408592 |
| NM_017921 | NPL0C4 | 3318  | 3405  | 6.84761033696 |
| NM_017922 | PRPF39 | 2627  | 2668  | 4.65923604793 |
| NM_017922 | PRPF39 | 1252  | 1322  | 4.65906229762 |
| NM_017922 | PRPF39 | 239   | 283   | 5.65906229762 |

|              |        |       |       |               |
|--------------|--------|-------|-------|---------------|
| NM_003217    | TMBIM6 | 2337  | 2408  | 7.62774842163 |
| NM_003217    | TMBIM6 | 1843  | 1883  | 5.92730870349 |
| NM_003217    | TMBIM6 | 2089  | 2141  | 5.51227120421 |
| NM_003217    | TMBIM6 | 1519  | 1630  | 7.62774842163 |
| NM_003217    | TMBIM6 | 2720  | 2867  | 8.01477154474 |
| NM_003217    | TMBIM6 | 1630  | 1823  | 7.73466362555 |
| NM_003217    | TMBIM6 | 1174  | 1438  | 8.78528969862 |
| NM_003217    | TMBIM6 | 2409  | 2661  | 9.31962612627 |
| NM_003217    | TMBIM6 | 1891  | 2070  | 8.51227120421 |
| NM_003217    | TMBIM6 | 2165  | 2333  | 8.38674032213 |
| NM_003217    | TMBIM6 | 52    | 1167  | 12.0668600559 |
| NM_001167671 | LPP    | 13567 | 13608 | 7.09219964535 |
| NM_001167671 | LPP    | 6850  | 6908  | 8.76130135546 |
| NM_001167671 | LPP    | 15720 | 15792 | 8.09219964535 |
| NM_001167671 | LPP    | 5152  | 5206  | 7.17232125456 |
| NM_001167671 | LPP    | 3860  | 3920  | 7.17633212368 |
| NM_001167671 | LPP    | 5752  | 5807  | 7.17616510442 |
| NM_001167671 | LPP    | 16532 | 16612 | 8.76130135546 |
| NM_001167671 | LPP    | 14505 | 14588 | 8.17633212368 |
| NM_001167671 | LPP    | 7371  | 7455  | 8.76130135524 |
| NM_001167671 | LPP    | 8780  | 8839  | 8.76130135546 |
| NM_001167671 | LPP    | 16439 | 16492 | 7.17633885474 |
| NM_001167671 | LPP    | 10775 | 10831 | 8.76130135546 |
| NM_001167671 | LPP    | 8911  | 8951  | 8.17232125456 |
| NM_001167671 | LPP    | 17437 | 17496 | 8.17633212368 |
| NM_001167671 | LPP    | 17363 | 17424 | 7.17616510442 |
| NM_001167671 | LPP    | 15446 | 15497 | 7.17232125456 |
| NM_001167671 | LPP    | 7784  | 7834  | 7.17633885474 |
| NM_001167671 | LPP    | 16053 | 16102 | 8.17633212368 |
| NM_001167671 | LPP    | 13407 | 13449 | 9.17633885474 |
| NM_001167671 | LPP    | 5971  | 6032  | 7.17633861882 |
| NM_001167671 | LPP    | 2007  | 2092  | 7.17633885474 |
| NM_001167671 | LPP    | 1814  | 1874  | 8.76130135546 |
| NM_001167671 | LPP    | 2813  | 2884  | 7.17616510442 |
| NM_001167671 | LPP    | 756   | 802   | 7.17232125456 |
| NM_001167671 | LPP    | 13631 | 13697 | 7.17633885474 |
| NM_001167671 | LPP    | 15282 | 15333 | 7.17232125456 |
| NM_001167671 | LPP    | 663   | 733   | 8.17616510442 |
| NM_001167671 | LPP    | 6690  | 6794  | 8.76130135546 |
| NM_001167671 | LPP    | 2633  | 2683  | 7.17633884719 |
| NM_001167671 | LPP    | 13077 | 13142 | 8.76130135546 |
| NM_001167671 | LPP    | 1930  | 2001  | 8.76130111954 |
| NM_001167671 | LPP    | 13180 | 13259 | 8.17633885474 |
| NM_001167671 | LPP    | 7067  | 7154  | 8.17633885474 |
| NM_001167671 | LPP    | 121   | 215   | 7.17633212368 |
| NM_001167671 | LPP    | 13332 | 13406 | 8.17633885474 |
| NM_001167671 | LPP    | 13453 | 13515 | 8.17232125456 |
| NM_001167671 | LPP    | 15798 | 15879 | 8.75728375529 |
| NM_001167671 | LPP    | 2199  | 2362  | 8.76130135546 |
| NM_001167671 | LPP    | 8263  | 8321  | 8.17232125456 |

|              |          |       |       |                |               |
|--------------|----------|-------|-------|----------------|---------------|
| NM_001167671 | LPP      | 491   | 578   | 8.17633212368  |               |
| NM_001167671 | LPP      | 3931  | 4016  | 8.17633884719  |               |
| NM_001167671 | LPP      | 10943 | 11009 | 7.17232125456  |               |
| NM_001167671 | LPP      | 12372 | 12458 | 7.17633884719  |               |
| NM_001167671 | LPP      | 2546  | 2627  | 7.17616510442  |               |
| NM_001167671 | LPP      | 17573 | 17676 | 7.17633884719  |               |
| NM_001167671 | LPP      | 1360  | 1612  | 10.4982669496  |               |
| NM_003214    | TEAD3    | 1389  | 1434  | 6.46395413619  |               |
| NM_203458    | NOTCH2NL |       | 530   | 604            | 8.98731484189 |
| NM_203458    | NOTCH2NL |       | 635   | 729            | 8.98730811084 |
| NM_203458    | NOTCH2NL |       | 5179  | 5236           | 8.90317563251 |
| NM_203458    | NOTCH2NL |       | 271   | 374            | 10.5722773426 |
| NM_203458    | NOTCH2NL |       | 773   | 834            | 10.5722706116 |
| NM_001030055 | ARHGAP5  | 4164  | 4215  | 5.30574728588  |               |
| NM_001030055 | ARHGAP5  | 3193  | 3267  | 5.30592080028  |               |
| NM_001030055 | ARHGAP5  | 6766  | 6822  | 5.30190343603  |               |
| NM_001030055 | ARHGAP5  | 1443  | 1537  | 6.30592103619  |               |
| NM_001030055 | ARHGAP5  | 6836  | 6896  | 5.88686593675  |               |
| NM_001030055 | ARHGAP5  | 475   | 579   | 5.30190343603  |               |
| NM_001030055 | ARHGAP5  | 5721  | 5807  | 4.30190343603  |               |
| NM_153226    | SLC35G1  | 326   | 397   | 11.1118599416  |               |
| NM_153226    | SLC35G1  | 821   | 858   | 12.77694440516 |               |
| NM_153226    | SLC35G1  | 1054  | 1110  | 12.1958254007  |               |
| NM_153226    | SLC35G1  | 973   | 1052  | 12.7809616517  |               |
| NM_153226    | SLC35G1  | 752   | 810   | 12.7809616517  |               |
| NM_207520    | RTN4     | 2087  | 2128  | 5.47215986459  |               |
| NM_207520    | RTN4     | 2330  | 2425  | 7.28353238682  |               |
| NM_207520    | RTN4     | 2138  | 2291  | 7.9356090834   |               |
| NM_207520    | RTN4     | 1442  | 1932  | 10.7615796836  |               |
| NM_207520    | RTN4     | 905   | 1439  | 11.4874047202  |               |
| NM_207520    | RTN4     | 1943  | 1994  | 6.47617746476  |               |
| NM_207520    | RTN4     | 141   | 753   | 9.33415845989  |               |
| NM_001001438 | LSS      | 1393  | 1482  | 6.48033949075  |               |
| NM_001001438 | LSS      | 1601  | 1689  | 5.4803394832   |               |
| NM_001001438 | LSS      | 1022  | 1075  | 5.89537699003  |               |
| NM_001001438 | LSS      | 965   | 1006  | 4.89135938986  |               |
| NM_001001438 | LSS      | 1518  | 1579  | 4.89520323972  |               |
| NM_001001438 | LSS      | 1730  | 1809  | 3.89537698248  |               |
| NM_001001438 | LSS      | 275   | 478   | 6.21730508492  |               |
| NM_001001438 | LSS      | 519   | 682   | 6.89537699003  |               |
| NM_001001438 | LSS      | 709   | 821   | 3.89537699003  |               |
| NM_004269    | MED27    | 121   | 179   | 7.3955514745   |               |
| NM_004269    | MED27    | 199   | 257   | 7.3955514745   |               |
| NM_004268    | MED17    | 1898  | 1975  | 6.76676847218  |               |
| NM_004268    | MED17    | 113   | 167   | 6.68262927034  |               |
| NM_004268    | MED17    | 2644  | 2693  | 5.76275087955  |               |
| NM_001164508 | NEB      | 13176 | 13259 | 12.9842564617  |               |
| NM_004265    | FADS2    | 1281  | 1367  | 6.21068205151  |               |
| NM_004265    | FADS2    | 1449  | 1501  | 6.79564455222  |               |
| NM_004265    | FADS2    | 1377  | 1428  | 6.79563782117  |               |

|              |          |      |      |                    |
|--------------|----------|------|------|--------------------|
| NM_004265    | FADS2    | 947  | 1017 | 6.79162695205      |
| NM_004265    | FADS2    | 1747 | 1791 | 6.21067532045      |
| NM_004265    | FADS2    | 1033 | 1131 | 6.79564455201      |
| NM_004265    | FADS2    | 1601 | 1678 | 5.21068205128      |
| NM_004265    | FADS2    | 1180 | 1264 | 7.21068205151      |
| NM_004265    | FADS2    | 1791 | 1862 | 7.2106820515       |
| NM_004265    | FADS2    | 2710 | 2779 | 5.21068181559      |
| NM_004265    | FADS2    | 2320 | 2390 | 7.21068181559      |
| NM_004265    | FADS2    | 568  | 843  | 8.21068205151      |
| NM_004263    | SEMA4F   | 1508 | 1582 | 7.07183786572      |
| NM_001001433 | STX16    | 1921 | 1994 | 3.15016709978      |
| NM_001001433 | STX16    | 3326 | 3366 | 2.15000008051      |
| NM_001001433 | STX16    | 2440 | 2473 | 3.06603462145      |
| NM_001001433 | STX16    | 1594 | 1681 | 3.15000008051      |
| NM_001001433 | STX16    | 4155 | 4232 | 3.15016709978      |
| NM_001001433 | STX16    | 3610 | 3660 | 2.14615623066      |
| NM_001001433 | STX16    | 2887 | 3020 | 3.15017383083      |
| NM_001001433 | STX16    | 4589 | 4758 | 4.47210192572      |
| NM_001001433 | STX16    | 4500 | 4575 | 3.15017359491      |
| NM_004260    | RECQL4   | 2991 | 3056 | 9.09187508789      |
| NM_004260    | RECQL4   | 1592 | 1660 | 9.09187531626      |
| NM_004260    | RECQL4   | 2526 | 2578 | 8.08785772363      |
| NM_004260    | RECQL4   | 2776 | 2824 | 8.09186859275      |
| NM_004260    | RECQL4   | 2150 | 2218 | 9.08785772363      |
| NM_004260    | RECQL4   | 3580 | 3643 | 8.09186859275      |
| NM_004260    | RECQL4   | 3081 | 3140 | 9.67666407421      |
| NM_001124767 | C3orf78  | 244  | 312  | 6.69522196567      |
| NM_001100590 | KIAA0232 |      | 6022 | 6066 5.95336004829 |
| NM_022839    | MRPS11   | 542  | 636  | 6.98664593893      |
| NM_022832    | USP46    | 1382 | 1446 | 8.4449848343       |
| NM_022832    | USP46    | 176  | 237  | 9.44899570342      |
| NM_022830    | TUT1     | 1189 | 1255 | 8.05605964067      |
| NM_022830    | TUT1     | 929  | 1005 | 8.06007700493      |
| NM_022830    | TUT1     | 849  | 913  | 8.06007050979      |
| NM_022830    | TUT1     | 1296 | 1376 | 9.64503974156      |
| NM_198576    | AGRN     | 2428 | 2490 | 5.92403181314      |
| NM_198576    | AGRN     | 3191 | 3298 | 7.24595990803      |
| NM_198576    | AGRN     | 4736 | 4856 | 6.50899431386      |
| NM_198576    | AGRN     | 3964 | 4010 | 4.92403157722      |
| NM_198576    | AGRN     | 4636 | 4708 | 7.7313867352       |
| NM_198576    | AGRN     | 7212 | 7316 | 7.92403181314      |
| NM_198576    | AGRN     | 3322 | 3425 | 8.09395681458      |
| NM_198576    | AGRN     | 3085 | 3156 | 5.92403181314      |
| NM_198576    | AGRN     | 2311 | 2370 | 5.92001421297      |
| NM_198576    | AGRN     | 5354 | 5407 | 7.24595990803      |
| NM_198576    | AGRN     | 6187 | 6303 | 8.92403181314      |
| NM_198576    | AGRN     | 550  | 587  | 4.92385806282      |
| NM_198576    | AGRN     | 3865 | 3927 | 5.92403181314      |
| NM_198576    | AGRN     | 3441 | 3515 | 6.50899431386      |
| NM_198576    | AGRN     | 5896 | 5938 | 6.50898758281      |

|           |         |      |      |               |
|-----------|---------|------|------|---------------|
| NM_198576 | AGRN    | 966  | 1027 | 5.92403181292 |
| NM_198576 | AGRN    | 6600 | 6719 | 9.01149465439 |
| NM_198576 | AGRN    | 4448 | 4620 | 8.7313867352  |
| NM_198576 | AGRN    | 1447 | 1558 | 8.09395681458 |
| NM_198576 | AGRN    | 5561 | 5886 | 9.92403181314 |
| NM_198576 | AGRN    | 2038 | 2181 | 8.62447153128 |
| NM_198576 | AGRN    | 1570 | 1763 | 8.92403181314 |
| NM_198576 | AGRN    | 1336 | 1398 | 6.92403181314 |
| NM_198576 | AGRN    | 6473 | 6578 | 5.92403181314 |
| NM_198576 | AGRN    | 1808 | 1922 | 8.83092240875 |
| NM_198576 | AGRN    | 6308 | 6437 | 6.50899431386 |
| NM_198576 | AGRN    | 4019 | 4122 | 6.92403181314 |
| NM_198576 | AGRN    | 3734 | 3858 | 8.7313867352  |
| NM_198576 | AGRN    | 757  | 887  | 6.50899431386 |
| NM_198576 | AGRN    | 6129 | 6167 | 4.92385806282 |
| NM_198576 | AGRN    | 4135 | 4177 | 4.92001421297 |
| NM_198576 | AGRN    | 4906 | 5248 | 8.24595990803 |
| NM_198576 | AGRN    | 6756 | 7071 | 9.6789193153  |
| NM_198576 | AGRN    | 239  | 548  | 9.6789193153  |
| NM_198576 | AGRN    | 3522 | 3696 | 8.09395681458 |
| NM_198576 | AGRN    | 5983 | 6126 | 7.50899431386 |
| NM_198576 | AGRN    | 595  | 692  | 5.92403181292 |
| NM_198576 | AGRN    | 2510 | 3068 | 10.5089943139 |
| NM_198576 | AGRN    | 161  | 234  | 7.24595990803 |
| NM_198576 | AGRN    | 4189 | 4394 | 7.7313867352  |
| NM_198576 | AGRN    | 1053 | 1312 | 7.92403181314 |
| NM_022834 | VWA1    | 2331 | 2407 | 9.98288553779 |
| NM_022834 | VWA1    | 1993 | 2061 | 9.39792303707 |
| NM_022834 | VWA1    | 3267 | 3331 | 8.39791630601 |
| NM_022834 | VWA1    | 1906 | 1981 | 9.98288553779 |
| NM_022834 | VWA1    | 919  | 971  | 10.719851132  |
| NM_022834 | VWA1    | 1669 | 1722 | 9.39792303685 |
| NM_022834 | VWA1    | 317  | 357  | 9.39774928675 |
| NM_022834 | VWA1    | 443  | 477  | 8.31378382768 |
| NM_022834 | VWA1    | 1799 | 1896 | 10.3979230371 |
| NM_022834 | VWA1    | 2146 | 2225 | 9.39792303707 |
| NM_022834 | VWA1    | 369  | 412  | 10.3979228011 |
| NM_022834 | VWA1    | 2440 | 2547 | 8.39792303707 |
| NM_022834 | VWA1    | 992  | 1105 | 11.719851132  |
| NM_022834 | VWA1    | 2232 | 2321 | 8.39792303707 |
| NM_022834 | VWA1    | 1369 | 1471 | 8.39792303707 |
| NM_022834 | VWA1    | 483  | 576  | 9.39792303707 |
| NM_022834 | VWA1    | 577  | 889  | 12.9214849931 |
| NM_022835 | PLEKHG2 | 3219 | 3256 | 10.9798382371 |
| NM_022835 | PLEKHG2 | 2346 | 2411 | 10.3950494867 |
| NM_022835 | PLEKHG2 | 6386 | 6473 | 9.39504948669 |
| NM_022835 | PLEKHG2 | 395  | 432  | 10.3950427556 |
| NM_022835 | PLEKHG2 | 3112 | 3153 | 9.39103188652 |
| NM_022835 | PLEKHG2 | 1628 | 1679 | 9.39504947914 |
| NM_022835 | PLEKHG2 | 3657 | 3735 | 10.9800119874 |

|              |         |      |      |               |
|--------------|---------|------|------|---------------|
| NM_022835    | PLEKHG2 | 2689 | 2782 | 9.39103188652 |
| NM_022835    | PLEKHG2 | 775  | 843  | 9.39504275564 |
| NM_022835    | PLEKHG2 | 80   | 173  | 9.39504948669 |
| NM_022835    | PLEKHG2 | 1325 | 1383 | 9.39103188652 |
| NM_022835    | PLEKHG2 | 2895 | 2976 | 10.3948757364 |
| NM_022835    | PLEKHG2 | 2218 | 2337 | 10.3950494867 |
| NM_022835    | PLEKHG2 | 1881 | 1953 | 9.39487573637 |
| NM_022835    | PLEKHG2 | 4480 | 4605 | 10.3950494867 |
| NM_080388    | S100A16 | 505  | 571  | 7.39647979074 |
| NM_080388    | S100A16 | 91   | 170  | 5.81151729002 |
| NM_080388    | S100A16 | 777  | 826  | 6.81151729002 |
| NM_080388    | S100A16 | 648  | 776  | 6.81151729002 |
| NM_080388    | S100A16 | 234  | 364  | 7.13344538491 |
| NM_001160372 | TRAPPC9 | 1055 | 1105 | 7.69754439477 |
| NM_001160372 | TRAPPC9 | 536  | 581  | 7.70138824463 |
| NM_001160372 | TRAPPC9 | 2121 | 2162 | 7.61742278556 |
| NM_001160372 | TRAPPC9 | 1734 | 1795 | 7.61742278556 |
| NM_014819    | PJA2    | 3996 | 4063 | 5.52637955978 |
| NM_014819    | PJA2    | 3202 | 3253 | 4.93740618994 |
| NM_014819    | PJA2    | 1246 | 1304 | 3.85728458073 |
| NM_014819    | PJA2    | 2711 | 2752 | 4.93740618994 |
| NM_014819    | PJA2    | 1562 | 1631 | 4.9412500398  |
| NM_014819    | PJA2    | 1888 | 1936 | 4.9412500398  |
| NM_014819    | PJA2    | 1067 | 1154 | 4.85728458073 |
| NM_020470    | YIF1A   | 61   | 117  | 7.7406423833  |
| NM_020470    | YIF1A   | 121  | 181  | 6.15166228241 |
| NM_020470    | YIF1A   | 181  | 218  | 8.15567987503 |
| NM_020470    | YIF1A   | 397  | 744  | 11.2431427238 |
| NM_020470    | YIF1A   | 752  | 1098 | 11.2000740019 |
| NM_001128212 | WDSUB1  | 235  | 326  | 7.0667017216  |
| NM_020474    | GALNT1  | 371  | 447  | 5.03262892964 |
| NM_020474    | GALNT1  | 0    | 54   | 7.61759143036 |
| NM_020474    | GALNT1  | 2692 | 2727 | 6.02861132946 |
| NM_020474    | GALNT1  | 700  | 764  | 7.83998385169 |
| NM_020474    | GALNT1  | 255  | 335  | 6.03262219858 |
| NM_020474    | GALNT1  | 2814 | 2858 | 6.03262219858 |
| NM_020474    | GALNT1  | 1486 | 1557 | 7.03262892964 |
| NM_020474    | GALNT1  | 2930 | 2973 | 6.03262892209 |
| NM_020474    | GALNT1  | 3274 | 3336 | 7.03262869372 |
| NM_020474    | GALNT1  | 2288 | 2351 | 5.94848972025 |
| NM_020474    | GALNT1  | 772  | 974  | 9.67648511941 |
| NM_020474    | GALNT1  | 447  | 611  | 9.03262892964 |
| NM_020474    | GALNT1  | 1580 | 1648 | 6.03262892209 |
| NM_020474    | GALNT1  | 633  | 698  | 7.83998385169 |
| NM_020474    | GALNT1  | 1173 | 1304 | 8.49206054827 |
| NM_020474    | GALNT1  | 1311 | 1454 | 8.03262892964 |
| NM_020474    | GALNT1  | 2373 | 2658 | 8.49206054827 |
| NM_020474    | GALNT1  | 1697 | 1827 | 7.35455702452 |
| NM_020474    | GALNT1  | 1844 | 2199 | 9.73306864778 |
| NM_020474    | GALNT1  | 124  | 246  | 8.61759143036 |

|              |         |      |      |               |
|--------------|---------|------|------|---------------|
| NM_020474    | GALNT1  | 975  | 1154 | 9.12009177089 |
| NM_025115    | TTI2    | 936  | 988  | 9.03227845423 |
| NM_025115    | TTI2    | 1201 | 1307 | 11.0322849494 |
| NM_025115    | TTI2    | 1715 | 1799 | 10.0322851777 |
| NM_001128219 | VGLL4   | 1781 | 1866 | 7.46085833423 |
| NM_001128219 | VGLL4   | 1968 | 2111 | 8.19782393594 |
| NM_198793    | CD47    | 2671 | 2746 | 8.9413800516  |
| NM_198793    | CD47    | 450  | 501  | 10.5263425525 |
| NM_198793    | CD47    | 171  | 441  | 14.0288428931 |
| NM_198793    | CD47    | 617  | 1151 | 15.0911271713 |
| NM_198793    | CD47    | 1163 | 1307 | 10.9413800518 |
| NM_198793    | CD47    | 1821 | 1894 | 10.5263425525 |
| NM_198793    | CD47    | 2278 | 2371 | 9.94138005182 |
| NM_001079862 | DBI     | 531  | 600  | 1.80189921552 |
| NM_001079862 | DBI     | 70   | 218  | 3.28732604269 |
| NM_001079862 | DBI     | 221  | 503  | 4.68942448626 |
| NM_001079864 | TAX1BP1 | 1049 | 1129 | 2.84757191107 |
| NM_001079864 | TAX1BP1 | 1265 | 1384 | 3.43253441179 |
| NM_001079864 | TAX1BP1 | 199  | 252  | 4.16950000573 |
| NM_001079864 | TAX1BP1 | 1136 | 1230 | 4.43253441179 |
| NM_001079864 | TAX1BP1 | 2480 | 2529 | 1.84757167515 |
| NM_001079864 | TAX1BP1 | 379  | 433  | 3.43253417587 |
| NM_001079864 | TAX1BP1 | 2646 | 2723 | 3.84757191107 |
| NM_001079864 | TAX1BP1 | 474  | 528  | 3.84757191107 |
| NM_001079864 | TAX1BP1 | 562  | 607  | 3.43253441157 |
| NM_001079864 | TAX1BP1 | 917  | 966  | 1.84756518002 |
| NM_001079864 | TAX1BP1 | 711  | 813  | 3.43253441179 |
| NM_001079864 | TAX1BP1 | 2364 | 2430 | 3.84757191107 |
| NM_001079864 | TAX1BP1 | 1662 | 1698 | 2.84757190352 |
| NM_001079864 | TAX1BP1 | 2534 | 2634 | 4.84757191107 |
| NM_001079864 | TAX1BP1 | 82   | 194  | 3.43253441179 |
| NM_001079864 | TAX1BP1 | 2089 | 2336 | 6.09549942451 |
| NM_001079864 | TAX1BP1 | 1392 | 1542 | 4.84757191107 |
| NM_001079864 | TAX1BP1 | 1723 | 2005 | 4.43253441179 |
| NM_001079864 | TAX1BP1 | 273  | 367  | 3.43253417587 |
| NM_001079864 | TAX1BP1 | 650  | 708  | 1.84739816075 |
| NM_198798    | ANKRD5  | 808  | 853  | 7.35788626399 |
| NM_198798    | ANKRD5  | 679  | 749  | 7.36190362824 |
| NM_175876    | EXOC8   | 151  | 205  | 10.1503923006 |
| NM_175876    | EXOC8   | 3906 | 3961 | 10.1503923006 |
| NM_001085354 | MORC4   | 3083 | 3203 | 7.68023512513 |
| NM_001085354 | MORC4   | 3039 | 3075 | 7.67621752496 |
| NM_001085354 | MORC4   | 2962 | 3028 | 7.67621752496 |
| NM_013349    | NENF    | 276  | 358  | 5.00888595913 |
| NM_002161    | IARS    | 4275 | 4328 | 4.22917637561 |
| NM_002161    | IARS    | 2602 | 2686 | 4.81414560739 |
| NM_002161    | IARS    | 777  | 871  | 5.55111120155 |
| NM_002161    | IARS    | 2294 | 2385 | 6.03653802872 |
| NM_002161    | IARS    | 2499 | 2552 | 4.81414559984 |
| NM_002161    | IARS    | 3943 | 3982 | 3.14504389728 |



|              |               |      |      |               |
|--------------|---------------|------|------|---------------|
| NM_002161    | IARS          | 3187 | 3227 | 3.22516550649 |
| NM_002161    | IARS          | 2214 | 2261 | 4.730006398   |
| NM_002161    | IARS          | 3037 | 3109 | 4.81012800721 |
| NM_002161    | IARS          | 1795 | 1843 | 3.14504389728 |
| NM_002161    | IARS          | 1465 | 1526 | 5.22918310666 |
| NM_002161    | IARS          | 1215 | 1300 | 5.22918310666 |
| NM_002161    | IARS          | 1395 | 1463 | 5.55111120155 |
| NM_002161    | IARS          | 3596 | 3741 | 5.22918310666 |
| NM_002161    | IARS          | 4064 | 4136 | 4.22516550649 |
| NM_002161    | IARS          | 3875 | 3917 | 3.22918310644 |
| NM_002161    | IARS          | 890  | 1047 | 6.22918310666 |
| NM_002161    | IARS          | 1130 | 1210 | 4.81414560739 |
| NM_002161    | IARS          | 518  | 625  | 5.22918310666 |
| NM_002161    | IARS          | 2392 | 2488 | 4.81414560738 |
| NM_002161    | IARS          | 349  | 488  | 6.03653802872 |
| NM_002161    | IARS          | 1531 | 1764 | 6.22918310666 |
| NM_202494    | GIPC1         | 1163 | 1239 | 9.11284572398 |
| NM_202494    | GIPC1         | 1319 | 1382 | 8.6978082247  |
| NM_202494    | GIPC1         | 336  | 389  | 8.10882812381 |
| NM_202494    | GIPC1         | 768  | 926  | 9.92020064604 |
| NM_202494    | GIPC1         | 616  | 766  | 9.43477381887 |
| NM_202494    | GIPC1         | 111  | 305  | 9.6978082247  |
| NM_002167    | ID3           | 566  | 642  | 8.91934045194 |
| NM_002167    | ID3           | 410  | 457  | 8.99946206115 |
| NM_002165    | ID1           | 883  | 928  | 4.72947612839 |
| NM_002165    | ID1           | 152  | 228  | 5.31443862933 |
| NM_002165    | ID1           | 9    | 130  | 7.72947612861 |
| NM_002165    | ID1           | 498  | 561  | 3.72545852844 |
| NM_002165    | ID1           | 613  | 775  | 7.0514042235  |
| NM_002165    | ID1           | 261  | 359  | 6.0514042235  |
| NM_002165    | ID1           | 390  | 487  | 6.31443862933 |
| NM_001199864 | BCL2L2-PABPN1 | 1763 | 1847 | 5.30701605094 |
| NM_001199864 | BCL2L2-PABPN1 | 1712 | 1763 | 3.13709104927 |
| NM_001199864 | BCL2L2-PABPN1 | 824  | 867  | 3.13709104949 |
| NM_001199864 | BCL2L2-PABPN1 | 298  | 341  | 2.05295184011 |
| NM_001199864 | BCL2L2-PABPN1 | 881  | 953  | 2.13709081358 |
| NM_001199864 | BCL2L2-PABPN1 | 1451 | 1511 | 2.13307344932 |
| NM_001199864 | BCL2L2-PABPN1 | 242  | 285  | 2.05295184011 |
| NM_001199864 | BCL2L2-PABPN1 | 1582 | 1684 | 3.13709104949 |
| NM_001199864 | BCL2L2-PABPN1 | 694  | 757  | 3.13709104195 |
| NM_001199864 | BCL2L2-PABPN1 | 1343 | 1413 | 2.13709104195 |
| NM_001199864 | BCL2L2-PABPN1 | 528  | 594  | 3.72204681916 |
| NM_001242676 | AHCYL1        | 1004 | 1074 | 3.83580120166 |
| NM_001242676 | AHCYL1        | 597  | 664  | 3.83579447083 |
| NM_001242676 | AHCYL1        | 749  | 803  | 3.16669949177 |
| NM_001242676 | AHCYL1        | 1666 | 1711 | 2.25083846524 |
| NM_001242676 | AHCYL1        | 3588 | 3641 | 4.25083846524 |
| NM_001242676 | AHCYL1        | 1092 | 1286 | 5.71027031979 |
| NM_001242676 | AHCYL1        | 500  | 592  | 4.83580120188 |
| NM_001242676 | AHCYL1        | 1311 | 1430 | 4.25083870116 |

|              |          |      |      |                    |
|--------------|----------|------|------|--------------------|
| NM_001242676 | AHCYL1   | 884  | 952  | 3.25083870094      |
| NM_001242676 | AHCYL1   | 670  | 740  | 3.25066495084      |
| NM_001199867 | MARK4    | 1193 | 1250 | 5.58743708128      |
| NM_001199867 | MARK4    | 309  | 357  | 5.58743708128      |
| NM_001199867 | MARK4    | 1327 | 1367 | 5.67157605475      |
| NM_001199867 | MARK4    | 2553 | 2592 | 5.67157628312      |
| NM_001199867 | MARK4    | 678  | 731  | 6.67157628312      |
| NM_001199861 | KCNAB2   | 547  | 628  | 8.81532803072      |
| NM_013346    | SNX12    | 543  | 565  | 4.6914894629       |
| NM_013346    | SNX12    | 318  | 429  | 5.69148273185      |
| NM_013346    | SNX12    | 2183 | 2241 | 6.27627821331      |
| NM_013346    | SNX12    | 1081 | 1147 | 4.69148922699      |
| NM_013346    | SNX12    | 1694 | 1738 | 4.69131571259      |
| NM_013346    | SNX12    | 656  | 822  | 7.86141446435      |
| NM_013346    | SNX12    | 129  | 280  | 6.6914894629       |
| NM_013346    | SNX12    | 2269 | 2381 | 5.6914894629       |
| NM_013346    | SNX12    | 2016 | 2129 | 7.01341755779      |
| NM_001136201 | ISOC2    | 743  | 800  | 7.55766914342      |
| NM_001136200 | C10orf32 |      | 1460 | 1515 5.80380277882 |
| NM_001136200 | C10orf32 |      | 349  | 402 6.22285114722  |
| NM_001136200 | C10orf32 |      | 1328 | 1375 5.13871866889 |
| NM_001136200 | C10orf32 |      | 632  | 800 4.22285787828  |
| NM_001130691 | PPP3CA   | 928  | 1027 | 9.24721975617      |
| NM_001130691 | PPP3CA   | 2994 | 3050 | 8.66208350513      |
| NM_001130691 | PPP3CA   | 1793 | 1869 | 8.66225701953      |
| NM_001130691 | PPP3CA   | 2019 | 2092 | 8.65823965528      |
| NM_001130691 | PPP3CA   | 1321 | 1414 | 7.66225701953      |
| NM_001130691 | PPP3CA   | 2563 | 2629 | 9.243202156        |
| NM_001130691 | PPP3CA   | 1915 | 1995 | 8.65823965528      |
| NM_001130691 | PPP3CA   | 1029 | 1149 | 9.24721975617      |
| NM_001130691 | PPP3CA   | 781  | 868  | 9.98418535034      |
| NM_203290    | POLR1C   | 323  | 406  | 7.38808657071      |
| NM_203290    | POLR1C   | 654  | 715  | 6.97304907143      |
| NM_001040694 | INCENP   | 2771 | 2907 | 9.85653695896      |
| NM_001040694 | INCENP   | 3828 | 3912 | 8.27157445824      |
| NM_001040694 | INCENP   | 3505 | 3546 | 7.27140070792      |
| NM_001040694 | INCENP   | 2564 | 2604 | 7.27140070792      |
| NM_001040694 | INCENP   | 1386 | 1435 | 7.27140070792      |
| NM_001040694 | INCENP   | 1018 | 1115 | 8.27157445069      |
| NM_001040694 | INCENP   | 127  | 188  | 8.27156772718      |
| NM_001040694 | INCENP   | 1805 | 1869 | 8.26755685806      |
| NM_001040694 | INCENP   | 311  | 358  | 8.26755685806      |
| NM_001040694 | INCENP   | 858  | 897  | 8.18743524885      |
| NM_001040694 | INCENP   | 234  | 308  | 9.59350255312      |
| NM_001040694 | INCENP   | 1211 | 1290 | 8.27157445069      |
| NM_001040694 | INCENP   | 2993 | 3114 | 9.85653695896      |
| NM_001040694 | INCENP   | 701  | 813  | 9.27157445824      |
| NM_001040694 | INCENP   | 365  | 441  | 8.27157445069      |
| NM_001040694 | INCENP   | 3178 | 3339 | 9.59350255312      |
| NM_144949    | SOC5     | 3307 | 3347 | 6.92111504225      |

|              |          |      |      |               |               |
|--------------|----------|------|------|---------------|---------------|
| NM_144949    | SOC55    | 2650 | 2734 | 8.00525424409 |               |
| NM_002305    | LGALS1   | 449  | 511  | 6.58957802247 |               |
| NM_002305    | LGALS1   | 47   | 256  | 7.91150611736 |               |
| NM_001126111 | OSGIN2   | 1526 | 1594 | 8.80668028799 |               |
| NM_024571    | SNRNP25  | 279  | 340  | 6.02986088563 |               |
| NM_024571    | SNRNP25  | 699  | 789  | 5.02986761669 |               |
| NM_024573    | C6orf211 |      | 939  | 986           | 6.64818220997 |
| NM_024573    | C6orf211 |      | 1075 | 1130          | 6.65219981014 |
| NM_024573    | C6orf211 |      | 1376 | 1425          | 7.23715557981 |
| NM_024573    | C6orf211 |      | 855  | 933           | 5.64818220997 |
| NM_024573    | C6orf211 |      | 644  | 721           | 7.97412790503 |
| NM_024573    | C6orf211 |      | 1021 | 1072          | 7.97412790503 |
| NM_024573    | C6orf211 |      | 772  | 825           | 7.65219981015 |
| NM_024573    | C6orf211 |      | 1749 | 1807          | 6.65219307909 |
| NM_024573    | C6orf211 |      | 1579 | 1653          | 6.65202605983 |
| NM_024573    | C6orf211 |      | 1282 | 1372          | 8.23716231087 |
| NM_024573    | C6orf211 |      | 1171 | 1258          | 7.97412790503 |
| NM_024573    | C6orf211 |      | 1439 | 1568          | 7.97412790503 |
| NM_007218    | RNF139   | 1327 | 1373 | 7.01791068117 |               |
| NM_007218    | RNF139   | 657  | 727  | 8.09803229038 |               |
| NM_007218    | RNF139   | 1383 | 1417 | 6.10187614024 |               |
| NM_007218    | RNF139   | 473  | 528  | 6.10187614024 |               |
| NM_007218    | RNF139   | 1422 | 1581 | 9.8024896087  |               |
| NM_007218    | RNF139   | 1757 | 1833 | 7.68701239105 |               |
| NM_007218    | RNF139   | 1643 | 1717 | 7.102049883   |               |
| NM_001004304 | ZNF740   | 882  | 970  | 7.03506896064 |               |
| NM_001004304 | ZNF740   | 2697 | 2780 | 7.9509297588  |               |
| NM_001130963 | TMEM194A |      | 561  | 658           | 11.2258053262 |
| NM_001130963 | TMEM194A |      | 507  | 557           | 10.2936692102 |
| NM_001130963 | TMEM194A |      | 944  | 1021          | 9.64084282543 |
| NM_001130963 | TMEM194A |      | 1069 | 1233          | 9.64084282543 |
| NM_001130963 | TMEM194A |      | 130  | 193           | 9.05186272453 |
| NM_001130963 | TMEM194A |      | 694  | 917           | 11.0558803247 |
| NM_032421    | CLIP2    | 2402 | 2441 | 5.51558874702 |               |
| NM_032421    | CLIP2    | 529  | 584  | 4.51558874702 |               |
| NM_032421    | CLIP2    | 1266 | 1319 | 4.4354671378  |               |
| NM_032421    | CLIP2    | 5028 | 5086 | 4.51960611127 |               |
| NM_032421    | CLIP2    | 438  | 499  | 4.51558874702 |               |
| NM_032429    | LZTS2    | 801  | 856  | 6.10132041545 |               |
| NM_032429    | LZTS2    | 425  | 497  | 7.10132041545 |               |
| NM_032429    | LZTS2    | 1846 | 1917 | 7.68628268781 |               |
| NM_012140    | SLC25A10 |      | 321  | 382           | 6.71439723252 |
| NM_012140    | SLC25A10 |      | 971  | 1030          | 6.79451884173 |
| NM_012140    | SLC25A10 |      | 547  | 606           | 7.79852971085 |
| NM_012140    | SLC25A10 |      | 743  | 806           | 6.79853643435 |
| NM_031885    | BBS2     | 737  | 803  | 5.96241671687 |               |
| NM_031885    | BBS2     | 623  | 693  | 5.96642758599 |               |
| NM_181892    | UBE2D3   | 1987 | 2022 | 5.42504539598 |               |
| NM_181892    | UBE2D3   | 731  | 768  | 5.50917787431 |               |
| NM_181892    | UBE2D3   | 1122 | 1195 | 7.09414710586 |               |

|              |         |      |      |               |
|--------------|---------|------|------|---------------|
| NM_181892    | UBE2D3  | 112  | 159  | 5.42504539598 |
| NM_181892    | UBE2D3  | 808  | 869  | 6.50918460536 |
| NM_181892    | UBE2D3  | 1310 | 1381 | 7.50918460536 |
| NM_181892    | UBE2D3  | 2421 | 2516 | 7.09414710609 |
| NM_181892    | UBE2D3  | 937  | 980  | 7.50918460536 |
| NM_181892    | UBE2D3  | 346  | 394  | 6.50918459782 |
| NM_181892    | UBE2D3  | 1046 | 1080 | 5.42504539598 |
| NM_181892    | UBE2D3  | 1831 | 1868 | 5.50516700519 |
| NM_181892    | UBE2D3  | 500  | 731  | 9.41607520097 |
| NM_181892    | UBE2D3  | 1387 | 1481 | 7.09414709854 |
| NM_181892    | UBE2D3  | 1199 | 1296 | 7.09414710609 |
| NM_181892    | UBE2D3  | 1607 | 1710 | 7.83111270025 |
| NM_014583    | LMCD1   | 1051 | 1124 | 9.05699197724 |
| NM_014580    | SLC2A8  | 1629 | 1676 | 8.61579867131 |
| NM_014580    | SLC2A8  | 1538 | 1591 | 7.02681857064 |
| NM_014580    | SLC2A8  | 1286 | 1396 | 10.0308361708 |
| NM_014580    | SLC2A8  | 1094 | 1245 | 10.3527642657 |
| NM_014580    | SLC2A8  | 91   | 125  | 6.94669696143 |
| NM_014580    | SLC2A8  | 1397 | 1526 | 11.2007611723 |
| NM_014580    | SLC2A8  | 164  | 245  | 9.3527642657  |
| NM_014580    | SLC2A8  | 744  | 842  | 7.03083617081 |
| NM_014580    | SLC2A8  | 1677 | 1971 | 11.731275889  |
| NM_014580    | SLC2A8  | 842  | 1092 | 11.0308361708 |
| NM_014580    | SLC2A8  | 298  | 669  | 11.6157986715 |
| NM_014585    | SLC40A1 | 845  | 923  | 6.58720714659 |
| NM_014585    | SLC40A1 | 1163 | 1206 | 7.17216941139 |
| NM_014585    | SLC40A1 | 637  | 813  | 8.75713214803 |
| NM_014585    | SLC40A1 | 1908 | 1992 | 7.17216291626 |
| NM_014585    | SLC40A1 | 1387 | 1572 | 9.97952456937 |
| NM_014585    | SLC40A1 | 939  | 1102 | 8.75713214803 |
| NM_014585    | SLC40A1 | 1268 | 1387 | 7.58720714659 |
| NM_014585    | SLC40A1 | 171  | 293  | 6.58720714659 |
| NM_014585    | SLC40A1 | 372  | 530  | 8.58720714659 |
| NM_014585    | SLC40A1 | 1601 | 1907 | 9.97952456937 |
| NM_014584    | ER01L   | 2815 | 2890 | 4.91172432731 |
| NM_014584    | ER01L   | 2289 | 2326 | 4.2426226172  |
| NM_014584    | ER01L   | 2698 | 2727 | 4.32274422641 |
| NM_014584    | ER01L   | 876  | 992  | 7.13411674864 |
| NM_014584    | ER01L   | 2998 | 3036 | 4.32274422641 |
| NM_014584    | ER01L   | 152  | 320  | 6.13411674864 |
| NM_014584    | ER01L   | 321  | 870  | 9.80249525755 |
| NM_014584    | ER01L   | 1007 | 1278 | 8.61216404545 |
| NM_014584    | ER01L   | 2461 | 2570 | 6.13411674864 |
| NM_014584    | ER01L   | 1983 | 2083 | 4.32676182659 |
| NM_014584    | ER01L   | 1839 | 1941 | 3.32676182659 |
| NM_014584    | ER01L   | 1291 | 1718 | 9.39285101704 |
| NM_001037277 | GGPS1   | 685  | 736  | 5.36584099201 |
| NM_001037277 | GGPS1   | 286  | 359  | 5.44596260123 |
| NM_080732    | EGLN2   | 1251 | 1340 | 10.4823416988 |
| NM_080732    | EGLN2   | 1043 | 1089 | 7.8972054478  |

|           |        |       |       |               |
|-----------|--------|-------|-------|---------------|
| NM_080732 | EGLN2  | 1456  | 1538  | 7.89737919811 |
| NM_080732 | EGLN2  | 888   | 944   | 8.8972054478  |
| NM_080732 | EGLN2  | 1597  | 1749  | 10.7047341202 |
| NM_018138 | TBCCD1 | 629   | 690   | 8.36587363136 |
| NM_018138 | TBCCD1 | 817   | 903   | 8.95083613208 |
| NM_018138 | TBCCD1 | 295   | 373   | 7.36587363136 |
| NM_018138 | TBCCD1 | 2100  | 2138  | 7.36588036241 |
| NM_018138 | TBCCD1 | 1957  | 2037  | 7.36588036242 |
| NM_018136 | ASPM   | 10746 | 10813 | 9.25176041303 |
| NM_018136 | ASPM   | 8846  | 8907  | 8.51479481886 |
| NM_018136 | ASPM   | 6673  | 6737  | 9.25176041302 |
| NM_018136 | ASPM   | 2201  | 2279  | 8.92965856782 |
| NM_018136 | ASPM   | 7723  | 7773  | 7.92982558709 |
| NM_018136 | ASPM   | 10093 | 10123 | 6.92581471797 |
| NM_018136 | ASPM   | 3754  | 3861  | 9.25176041303 |
| NM_018136 | ASPM   | 9598  | 9643  | 7.92982558709 |
| NM_018136 | ASPM   | 4389  | 4474  | 9.92983231814 |
| NM_018136 | ASPM   | 10370 | 10432 | 7.92983208222 |
| NM_018136 | ASPM   | 4317  | 4388  | 8.51479481886 |
| NM_018136 | ASPM   | 400   | 459   | 8.51479481886 |
| NM_018136 | ASPM   | 566   | 594   | 6.84569310875 |
| NM_018136 | ASPM   | 356   | 400   | 7.92983231059 |
| NM_018136 | ASPM   | 1559  | 1640  | 6.92983231792 |
| NM_018136 | ASPM   | 2778  | 2836  | 8.92983231814 |
| NM_018136 | ASPM   | 8777  | 8827  | 8.51478808781 |
| NM_018136 | ASPM   | 6182  | 6255  | 6.92982558709 |
| NM_018136 | ASPM   | 9300  | 9355  | 7.84569310875 |
| NM_018136 | ASPM   | 2299  | 2366  | 8.92983231059 |
| NM_018136 | ASPM   | 1372  | 1416  | 6.92983231059 |
| NM_018136 | ASPM   | 5829  | 5870  | 6.92982558709 |
| NM_018136 | ASPM   | 3134  | 3260  | 9.7371872402  |
| NM_018136 | ASPM   | 4125  | 4185  | 7.92983231814 |
| NM_018136 | ASPM   | 9523  | 9596  | 6.92983231792 |
| NM_018136 | ASPM   | 2366  | 2432  | 7.92983231813 |
| NM_018136 | ASPM   | 4003  | 4099  | 7.92983231814 |
| NM_018136 | ASPM   | 3306  | 3383  | 6.92983231814 |
| NM_018136 | ASPM   | 5907  | 5946  | 6.92983208222 |
| NM_018136 | ASPM   | 1138  | 1208  | 8.92983231792 |
| NM_018136 | ASPM   | 4900  | 4951  | 7.92581471797 |
| NM_018136 | ASPM   | 3548  | 3635  | 9.7371872402  |
| NM_018136 | ASPM   | 8049  | 8155  | 7.92982558709 |
| NM_018136 | ASPM   | 2838  | 3031  | 10.8367229137 |
| NM_018136 | ASPM   | 1707  | 1768  | 7.92983231792 |
| NM_018136 | ASPM   | 8568  | 8662  | 7.92581471797 |
| NM_018136 | ASPM   | 10230 | 10320 | 8.51479481886 |
| NM_018136 | ASPM   | 947   | 1105  | 8.92983231814 |
| NM_018136 | ASPM   | 5018  | 5100  | 6.92983231813 |
| NM_018136 | ASPM   | 67    | 177   | 9.25176041303 |
| NM_018136 | ASPM   | 9985  | 10058 | 6.92581471797 |
| NM_018136 | ASPM   | 804   | 876   | 7.92983231059 |

|              |       |      |      |               |
|--------------|-------|------|------|---------------|
| NM_018136    | ASPM  | 2603 | 2773 | 10.0997573196 |
| NM_018133    | MSL2  | 1615 | 1686 | 8.81526394802 |
| NM_018133    | MSL2  | 545  | 647  | 9.55222954219 |
| NM_018130    | SHQ1  | 450  | 505  | 6.68571546577 |
| NM_018131    | CEP55 | 742  | 794  | 8.17057754253 |
| NM_018131    | CEP55 | 2060 | 2101 | 6.16655994258 |
| NM_018131    | CEP55 | 1725 | 1770 | 7.16655994258 |
| NM_018131    | CEP55 | 670  | 735  | 6.17057754275 |
| NM_018131    | CEP55 | 1837 | 1871 | 7.75553331242 |
| NM_018131    | CEP55 | 178  | 293  | 8.97793246481 |
| NM_018131    | CEP55 | 554  | 627  | 6.17057081169 |
| NM_018131    | CEP55 | 795  | 943  | 7.75554004347 |
| NM_018131    | CEP55 | 426  | 538  | 8.49250563764 |
| NM_001115113 | WDR26 | 900  | 931  | 4.44638942902 |
| NM_001115113 | WDR26 | 1902 | 1976 | 4.44656294341 |
| NM_001115113 | WDR26 | 6738 | 6786 | 4.44254557916 |
| NM_001115113 | WDR26 | 1389 | 1444 | 6.76849127421 |
| NM_001115113 | WDR26 | 1031 | 1100 | 6.03152568005 |
| NM_001115113 | WDR26 | 1743 | 1817 | 4.44254557916 |
| NM_001115113 | WDR26 | 591  | 648  | 6.44656317933 |
| NM_001115113 | WDR26 | 6562 | 6604 | 5.44655644828 |
| NM_001115113 | WDR26 | 4707 | 4751 | 4.44254557916 |
| NM_001115113 | WDR26 | 2890 | 2941 | 6.44655644828 |
| NM_001115113 | WDR26 | 1109 | 1148 | 6.02750807988 |
| NM_001115113 | WDR26 | 452  | 494  | 4.44254557916 |
| NM_001115113 | WDR26 | 1614 | 1718 | 6.03152568005 |
| NM_001115113 | WDR26 | 6036 | 6142 | 6.44656317933 |
| NM_001115113 | WDR26 | 2326 | 2424 | 6.03152568005 |
| NM_001115113 | WDR26 | 2426 | 2484 | 6.03152568005 |
| NM_001115113 | WDR26 | 1187 | 1261 | 7.25391810139 |
| NM_001115113 | WDR26 | 2104 | 2239 | 7.03152568005 |
| NM_001115113 | WDR26 | 1452 | 1589 | 7.03152568005 |
| NM_001115113 | WDR26 | 6650 | 6720 | 4.44655644828 |
| NM_001115113 | WDR26 | 4099 | 4162 | 4.44254557916 |
| NM_001115113 | WDR26 | 4564 | 4651 | 7.03152568005 |
| NM_001115113 | WDR26 | 1261 | 1354 | 6.03152568005 |
| NM_001115113 | WDR26 | 2617 | 2718 | 6.03152568005 |
| NM_001115113 | WDR26 | 6370 | 6479 | 7.03152568005 |
| NM_001115113 | WDR26 | 6276 | 6337 | 4.44638942902 |
| NM_001115113 | WDR26 | 648  | 751  | 6.768491274   |
| NM_015375    | DSTYK | 3715 | 3775 | 8.87370900528 |
| NM_018214    | LRR1  | 455  | 512  | 5.72646851687 |
| NM_018214    | LRR1  | 572  | 615  | 6.72646178582 |
| NM_018214    | LRR1  | 869  | 934  | 7.72646828096 |
| NM_018214    | LRR1  | 1394 | 1457 | 6.72629476656 |
| NM_018214    | LRR1  | 1852 | 1921 | 5.64232930749 |
| NM_018214    | LRR1  | 720  | 756  | 5.64232930749 |
| NM_018214    | LRR1  | 1739 | 1847 | 6.72646851688 |
| NM_018214    | LRR1  | 760  | 829  | 6.72646828096 |
| NM_018214    | LRR1  | 1642 | 1703 | 6.72629476656 |

|              |         |      |      |               |
|--------------|---------|------|------|---------------|
| NM_018214    | LRRC1   | 1470 | 1630 | 7.72646851688 |
| NM_018214    | LRRC1   | 992  | 1089 | 6.72646850933 |
| NM_014367    | FAM162A | 652  | 703  | 1.54128856366 |
| NM_014367    | FAM162A | 391  | 465  | 3.21039026621 |
| NM_014367    | FAM162A | 266  | 376  | 2.62542776549 |
| NM_005652    | TERF2   | 729  | 790  | 5.02063567482 |
| NM_005652    | TERF2   | 1895 | 1988 | 5.02465327499 |
| NM_005652    | TERF2   | 2730 | 2850 | 5.02465327499 |
| NM_014363    | SACS    | 2303 | 2354 | 9.96810479038 |
| NM_005654    | NR2F1   | 3138 | 3189 | 8.7684875224  |
| NM_005654    | NR2F1   | 1945 | 1986 | 8.7684875224  |
| NM_001190274 | FBX011  | 677  | 740  | 5.81335944045 |
| NM_001190274 | FBX011  | 352  | 429  | 4.23241430398 |
| NM_001190274 | FBX011  | 2440 | 2519 | 4.22839693972 |
| NM_001190274 | FBX011  | 2109 | 2220 | 5.81737704062 |
| NM_001190274 | FBX011  | 2706 | 2759 | 5.23224078958 |
| NM_001190274 | FBX011  | 3922 | 3991 | 4.22839693972 |
| NM_001190274 | FBX011  | 1280 | 1345 | 5.81737703307 |
| NM_001190274 | FBX011  | 2937 | 3008 | 4.14827533051 |
| NM_001190274 | FBX011  | 785  | 852  | 4.14827533051 |
| NM_001190274 | FBX011  | 574  | 647  | 5.81737704062 |
| NM_001190274 | FBX011  | 1456 | 1529 | 5.22839693972 |
| NM_001190274 | FBX011  | 3599 | 3677 | 4.23241430398 |
| NM_032283    | ZDHC18  | 712  | 755  | 6.92145823686 |
| NM_032283    | ZDHC18  | 407  | 497  | 7.5065944879  |
| NM_032286    | MED10   | 332  | 397  | 6.19963150415 |
| NM_032286    | MED10   | 0    | 108  | 7.78459400488 |
| NM_032286    | MED10   | 187  | 319  | 8.00698642622 |
| NM_032288    | FYTTD1  | 357  | 396  | 5.24490438485 |
| NM_001167614 | LEMD3   | 1094 | 1193 | 8.67085384557 |
| NM_001167614 | LEMD3   | 4409 | 4465 | 6.58671463619 |
| NM_001167614 | LEMD3   | 1216 | 1261 | 7.67084711452 |
| NM_001167614 | LEMD3   | 3574 | 3648 | 7.67068009525 |
| NM_001167614 | LEMD3   | 3173 | 3222 | 7.6668362454  |
| NM_001167614 | LEMD3   | 2679 | 2836 | 9.84077884701 |
| NM_001167614 | LEMD3   | 1692 | 1741 | 7.67085383802 |
| NM_001167614 | LEMD3   | 315  | 368  | 6.6668362454  |
| NM_001167614 | LEMD3   | 923  | 988  | 8.25580961524 |
| NM_001167614 | LEMD3   | 1420 | 1545 | 10.1302854642 |
| NM_001167614 | LEMD3   | 1741 | 1852 | 10.1302854642 |
| NM_001167614 | LEMD3   | 783  | 923  | 9.67085384557 |
| NM_001167614 | LEMD3   | 1559 | 1683 | 9.47820876763 |
| NM_001167614 | LEMD3   | 674  | 750  | 6.6668362454  |
| NM_001167614 | LEMD3   | 1276 | 1380 | 7.67085384557 |
| NM_001167614 | LEMD3   | 2840 | 2924 | 7.67085384557 |
| NM_001167614 | LEMD3   | 1869 | 2059 | 10.5777444412 |
| NM_001167614 | LEMD3   | 2501 | 2671 | 9.67085384557 |
| NM_001167614 | LEMD3   | 2153 | 2267 | 8.67085384557 |
| NM_001167614 | LEMD3   | 3236 | 3330 | 8.25581634629 |
| NM_015187    | SEL1L3  | 2203 | 2256 | 12.2461097645 |

|              |        |       |       |               |
|--------------|--------|-------|-------|---------------|
| NM_015187    | SEL1L3 | 4224  | 4325  | 12.8310722654 |
| NM_015187    | SEL1L3 | 4127  | 4212  | 13.5680378596 |
| NM_015187    | SEL1L3 | 2927  | 2991  | 13.5680378596 |
| NM_015187    | SEL1L3 | 3266  | 3427  | 16.0009972668 |
| NM_015187    | SEL1L3 | 2814  | 2891  | 12.2461097647 |
| NM_015187    | SEL1L3 | 3448  | 3523  | 13.5680378596 |
| NM_015187    | SEL1L3 | 2500  | 2549  | 11.2420921645 |
| NM_015187    | SEL1L3 | 931   | 1003  | 13.2461097647 |
| NM_015187    | SEL1L3 | 269   | 324   | 13.5680378596 |
| NM_015187    | SEL1L3 | 2084  | 2162  | 13.5680378596 |
| NM_015187    | SEL1L3 | 497   | 560   | 12.8310722654 |
| NM_015187    | SEL1L3 | 626   | 925   | 16.6036617693 |
| NM_015187    | SEL1L3 | 1010  | 1153  | 15.8899659545 |
| NM_015187    | SEL1L3 | 3109  | 3261  | 15.4160347661 |
| NM_015187    | SEL1L3 | 1874  | 2057  | 15.4160347661 |
| NM_015187    | SEL1L3 | 1448  | 1613  | 14.5680378596 |
| NM_015187    | SEL1L3 | 3585  | 3680  | 12.2461097647 |
| NM_015187    | SEL1L3 | 334   | 493   | 15.1530003603 |
| NM_015187    | SEL1L3 | 2556  | 2757  | 15.0534646867 |
| NM_015187    | SEL1L3 | 1158  | 1438  | 15.7696717207 |
| NM_015187    | SEL1L3 | 3009  | 3108  | 14.0534646867 |
| NM_015187    | SEL1L3 | 4341  | 4409  | 11.2461097645 |
| NM_015187    | SEL1L3 | 3918  | 3992  | 13.2461097571 |
| NM_015187    | SEL1L3 | 4417  | 4514  | 12.2420921645 |
| NM_015187    | SEL1L3 | 3708  | 3902  | 14.0534646867 |
| NM_015187    | SEL1L3 | 1613  | 1873  | 16.290503884  |
| NM_015187    | SEL1L3 | 2262  | 2410  | 14.2461097647 |
| NM_015180    | SYNE2  | 21399 | 21446 | 8.87059482133 |
| NM_015180    | SYNE2  | 17766 | 17822 | 7.87460569045 |
| NM_015180    | SYNE2  | 11526 | 11623 | 7.87460569045 |
| NM_015180    | SYNE2  | 17001 | 17052 | 7.79047321212 |
| NM_015180    | SYNE2  | 15532 | 15589 | 8.79047321212 |
| NM_015180    | SYNE2  | 5620  | 5686  | 7.87059482133 |
| NM_015180    | SYNE2  | 16322 | 16356 | 8.79047321212 |
| NM_015180    | SYNE2  | 488   | 527   | 7.79047321212 |
| NM_015180    | SYNE2  | 21473 | 21551 | 7.87461242149 |
| NM_015180    | SYNE2  | 1453  | 1532  | 7.87059482133 |
| NM_015180    | SYNE2  | 13660 | 13753 | 7.87461242128 |
| NM_015180    | SYNE2  | 16839 | 16933 | 7.87461241395 |
| NM_015180    | SYNE2  | 4588  | 4683  | 8.87461241395 |
| NM_015180    | SYNE2  | 20008 | 20078 | 8.87443867118 |
| NM_015183    | MAST4  | 1820  | 1902  | 9.43120969095 |
| NM_001017926 | ZHX1   | 1712  | 1757  | 7.54559557077 |
| NM_001017926 | ZHX1   | 1038  | 1143  | 7.96465067    |
| NM_001017926 | ZHX1   | 548   | 635   | 5.96063307005 |
| NM_001017926 | ZHX1   | 1148  | 1176  | 6.96063307005 |
| NM_001017926 | ZHX1   | 1347  | 1420  | 7.96063307005 |
| NM_203346    | HDLBP  | 3686  | 3720  | 1.48570037776 |
| NM_203346    | HDLBP  | 3620  | 3666  | 1.56983958714 |
| NM_203346    | HDLBP  | 1660  | 1725  | 2.56983958692 |



|              |         |      |      |               |               |
|--------------|---------|------|------|---------------|---------------|
| NM_203346    | HDLBP   | 671  | 752  | 3.56983958714 |               |
| NM_203346    | HDLBP   | 3745 | 3817 | 4.56983958714 |               |
| NM_203346    | HDLBP   | 3861 | 3950 | 2.56983958714 |               |
| NM_203346    | HDLBP   | 5273 | 5318 | 2.56582198697 |               |
| NM_203346    | HDLBP   | 2617 | 2658 | 3.07066287848 |               |
| NM_203346    | HDLBP   | 311  | 348  | 2.48570037776 |               |
| NM_203346    | HDLBP   | 798  | 858  | 3.56983958714 |               |
| NM_203346    | HDLBP   | 66   | 259  | 6.47673018275 |               |
| NM_203346    | HDLBP   | 2670 | 2696 | 1.48570037776 |               |
| NM_203346    | HDLBP   | 859  | 917  | 2.56983958714 |               |
| NM_203346    | HDLBP   | 937  | 1073 | 4.56983958714 |               |
| NM_203346    | HDLBP   | 2449 | 2564 | 3.56983958714 |               |
| NM_203346    | HDLBP   | 5320 | 5398 | 3.15480208764 |               |
| NM_203346    | HDLBP   | 3969 | 4115 | 4.89176768203 |               |
| NM_203346    | HDLBP   | 1730 | 1811 | 3.15480208787 |               |
| NM_203346    | HDLBP   | 1820 | 1939 | 4.73976458859 |               |
| NM_203346    | HDLBP   | 2699 | 2936 | 5.02927120578 |               |
| NM_203346    | HDLBP   | 531  | 671  | 4.73976458859 |               |
| NM_203346    | HDLBP   | 4116 | 4324 | 5.27027930529 |               |
| NM_203346    | HDLBP   | 2093 | 2226 | 3.56983958714 |               |
| NM_203346    | HDLBP   | 349  | 531  | 4.89176768203 |               |
| NM_203346    | HDLBP   | 1093 | 1504 | 6.27027930529 |               |
| NM_203346    | HDLBP   | 2975 | 3587 | 7.12442843882 |               |
| NM_001009925 | C2orf30 |      | 657  | 719           | 4.22976060851 |
| NM_001009925 | C2orf30 |      | 906  | 1010          | 4.22976037259 |
| NM_001009925 | C2orf30 |      | 1147 | 1234          | 4.81471637817 |
| NM_001009925 | C2orf30 |      | 388  | 517           | 5.81472310923 |
| NM_001009925 | C2orf30 |      | 136  | 187           | 3.22574300833 |
| NM_001009925 | C2orf30 |      | 525  | 613           | 4.81472310923 |
| NM_014752    | SPCS2   | 369  | 479  | 6.9827460615  |               |
| NM_014752    | SPCS2   | 1172 | 1229 | 2.89528298433 |               |
| NM_014752    | SPCS2   | 526  | 601  | 4.48024572097 |               |
| NM_014752    | SPCS2   | 480  | 524  | 5.21721131513 |               |
| NM_014752    | SPCS2   | 607  | 692  | 6.35471483888 |               |
| NM_014752    | SPCS2   | 708  | 1007 | 7.21721131513 |               |
| NM_014752    | SPCS2   | 56   | 357  | 8.25283522486 |               |
| NM_014752    | SPCS2   | 1023 | 1138 | 5.48024572097 |               |
| NM_001018159 | NAE1    | 518  | 574  | 3.84607607953 |               |
| NM_001018159 | NAE1    | 1282 | 1350 | 3.84206521041 |               |
| NM_001018159 | NAE1    | 854  | 953  | 2.84590906027 |               |
| NM_014753    | BMS1    | 2825 | 2872 | 5.16718555057 |               |
| NM_014753    | BMS1    | 3183 | 3260 | 4.16718555057 |               |
| NM_014753    | BMS1    | 951  | 1039 | 6.48928739577 |               |
| NM_014753    | BMS1    | 1788 | 1840 | 4.0832200915  |               |
| NM_014753    | BMS1    | 1344 | 1431 | 5.7523218016  |               |
| NM_014753    | BMS1    | 603  | 709  | 6.48928739576 |               |
| NM_005227    | EFNA4   | 426  | 476  | 10.0192916152 |               |
| NM_000232    | SGCB    | 426  | 468  | 7.01043913121 |               |
| NM_000232    | SGCB    | 884  | 953  | 9.90193326265 |               |
| NM_000232    | SGCB    | 513  | 627  | 10.4165064355 |               |

|           |        |      |      |                 |
|-----------|--------|------|------|-----------------|
| NM_000232 | SGCB   | 2506 | 2580 | 7.09056074042   |
| NM_000232 | SGCB   | 3319 | 3398 | 8.0945783406    |
| NM_000232 | SGCB   | 635  | 693  | 8.01043913121   |
| NM_000232 | SGCB   | 3463 | 3595 | 8.0945783406    |
| NM_000232 | SGCB   | 267  | 425  | 10.264503342    |
| NM_033487 | CDK11B | 1547 | 1610 | 6.71508371587   |
| NM_033487 | CDK11B | 1744 | 1818 | 6.71508371565   |
| NM_033487 | CDK11B | 1834 | 1901 | 7.30004621659   |
| NM_033487 | CDK11B | 378  | 423  | 5.7110661157    |
| NM_033487 | CDK11B | 1616 | 1704 | 8.03701181075   |
| NM_033487 | CDK11B | 1185 | 1307 | 7.71508371587   |
| NM_033487 | CDK11B | 2289 | 2494 | 8.71508371587   |
| NM_033487 | CDK11B | 1971 | 2087 | 7.30004621659   |
| NM_033487 | CDK11B | 1368 | 1508 | 8.71508371587   |
| NM_033487 | CDK11B | 124  | 279  | 7.30004621659   |
| NM_033480 | FBX09  | 2089 | 2156 | 5.53246317607   |
| NM_033480 | FBX09  | 816  | 857  | 4.86336146597   |
| NM_033480 | FBX09  | 171  | 229  | 4.94348307518   |
| NM_001026 | RPS24  | 75   | 202  | 1.42001680425   |
| NM_001026 | RPS24  | 202  | 604  | 2.97460565593   |
| NM_001024 | RPS21  | 285  | 384  | 3.05589452716   |
| NM_001024 | RPS21  | 69   | 282  | 3.64085702788   |
| NM_001025 | RPS23  | 205  | 277  | -0.165557041669 |
| NM_001025 | RPS23  | 45   | 168  | 0.727527754415  |
| NM_001025 | RPS23  | 279  | 566  | 2.27501554972   |
| NM_001022 | RPS19  | 306  | 639  | 4.54730733263   |
| NM_001022 | RPS19  | 641  | 837  | 2.77471782873   |
| NM_001023 | RPS20  | 85   | 550  | 6.03549865749   |
| NM_001020 | RPS16  | 47   | 226  | 5.54735991683   |
| NM_001020 | RPS16  | 227  | 585  | 7.07460691969   |
| NM_001021 | RPS17  | 153  | 264  | 3.28049934985   |
| NM_001021 | RPS17  | 363  | 564  | 5.68259779343   |
| NM_002208 | ITGAE  | 3478 | 3549 | 10.8236389766   |
| NM_002208 | ITGAE  | 3704 | 3755 | 9.82363897664   |
| NM_002208 | ITGAE  | 3279 | 3336 | 8.82346523387   |
| NM_002208 | ITGAE  | 3626 | 3678 | 10.3244622755   |
| NM_001028 | RPS25  | 8    | 466  | 3.80616392789   |
| NM_001029 | RPS26  | 236  | 308  | 3.58869229071   |
| NM_001029 | RPS26  | 326  | 684  | 6.43668919727   |
| NM_016062 | FAM96B | 508  | 572  | 6.54832824599   |
| NM_016062 | FAM96B | 321  | 347  | 4.46418903682   |
| NM_016062 | FAM96B | 178  | 310  | 6.8702563411    |
| NM_016063 | HDDC2  | 888  | 975  | 6.75290261989   |
| NM_016063 | HDDC2  | 221  | 294  | 5.16776636886   |
| NM_016063 | HDDC2  | 792  | 875  | 5.163922519     |
| NM_016065 | MRPS16 | 1894 | 1923 | 5.47764219977   |
| NM_016065 | MRPS16 | 292  | 327  | 6.55776380898   |
| NM_016065 | MRPS16 | 329  | 373  | 6.5617814016    |
| NM_016065 | MRPS16 | 469  | 513  | 7.5617814016    |
| NM_016065 | MRPS16 | 1282 | 1342 | 5.55776380898   |

|              |          |      |      |               |               |
|--------------|----------|------|------|---------------|---------------|
| NM_016065    | MRPS16   | 855  | 947  | 6.56178140915 |               |
| NM_016065    | MRPS16   | 514  | 575  | 6.56160765883 |               |
| NM_016065    | MRPS16   | 70   | 194  | 8.73170641059 |               |
| NM_016065    | MRPS16   | 1845 | 1888 | 5.55776380898 |               |
| NM_016065    | MRPS16   | 1722 | 1834 | 7.14674390987 |               |
| NM_016065    | MRPS16   | 377  | 466  | 5.56178140893 |               |
| NM_016065    | MRPS16   | 586  | 766  | 8.36913633121 |               |
| NM_016068    | FIS1     | 589  | 685  | 6.2050962961  |               |
| NM_016068    | FIS1     | 285  | 366  | 5.20107869592 |               |
| NM_016068    | FIS1     | 86   | 136  | 4.20492254578 |               |
| NM_016068    | FIS1     | 405  | 475  | 4.20509628855 |               |
| NM_016069    | PAM16    | 355  | 386  | 6.48742079086 |               |
| NM_022338    | C11orf24 |      | 670  | 720           | 4.4241352982  |
| NM_022338    | C11orf24 |      | 1058 | 1103          | 5.4239615481  |
| NM_022338    | C11orf24 |      | 307  | 351           | 5.33999608904 |
| NM_022338    | C11orf24 |      | 1888 | 1964          | 5.42413529087 |
| NM_022338    | C11orf24 |      | 778  | 945           | 7.42413529842 |
| NM_022338    | C11orf24 |      | 1631 | 1807          | 7.00909779914 |
| NM_022338    | C11orf24 |      | 436  | 628           | 8.51159813967 |
| NM_017444    | CHRA1    | 1352 | 1403 | 7.14117472025 |               |
| NM_017444    | CHRA1    | 1934 | 2016 | 8.14134847057 |               |
| NM_001008529 | MXRA7    | 804  | 916  | 6.08534486895 |               |
| NM_001134870 | KIAA1949 |      | 2724 | 2809          | 7.81759302241 |
| NM_000215    | JAK3     | 4445 | 4502 | 8.96286539139 |               |
| NM_001031723 | DNAJB14  | 5940 | 5998 | 6.05939057446 |               |
| NM_001031723 | DNAJB14  | 827  | 869  | 6.05922355519 |               |
| NM_001031723 | DNAJB14  | 4435 | 4475 | 6.64418605591 |               |
| NM_001031723 | DNAJB14  | 1189 | 1244 | 6.05939057446 |               |
| NM_001031723 | DNAJB14  | 1032 | 1166 | 6.05939730551 |               |
| NM_001031723 | DNAJB14  | 2712 | 2762 | 5.05939057446 |               |
| NM_001031723 | DNAJB14  | 4205 | 4286 | 7.05939057446 |               |
| NM_001031720 | GSTCD    | 1833 | 1869 | 8.82154289424 |               |
| NM_001031727 | MRI1     | 540  | 594  | 10.4042732562 |               |
| NM_001031727 | MRI1     | 1553 | 1594 | 10.4042732562 |               |
| NM_172115    | CAMK2D   | 845  | 921  | 5.36909989127 |               |
| NM_172115    | CAMK2D   | 1114 | 1172 | 5.95423614231 |               |
| NM_172115    | CAMK2D   | 1657 | 1748 | 5.95423590639 |               |
| NM_172115    | CAMK2D   | 1422 | 1592 | 6.36927364158 |               |
| NM_002109    | HARS     | 690  | 780  | 6.68349030071 |               |
| NM_002109    | HARS     | 1957 | 2013 | 5.36156219827 |               |
| NM_002109    | HARS     | 794  | 897  | 7.36156220582 |               |
| NM_002109    | HARS     | 1471 | 1539 | 5.3615622056  |               |
| NM_002109    | HARS     | 1590 | 1661 | 5.3613884555  |               |
| NM_002109    | HARS     | 914  | 1002 | 6.36156220582 |               |
| NM_002109    | HARS     | 1316 | 1439 | 5.36156220582 |               |
| NM_002109    | HARS     | 1685 | 1776 | 5.36156220581 |               |
| NM_002109    | HARS     | 1026 | 1078 | 4.35754460565 |               |
| NM_016207    | CPSF3    | 266  | 326  | 3.46276417056 |               |
| NM_016207    | CPSF3    | 2081 | 2137 | 4.45875330144 |               |
| NM_016207    | CPSF3    | 835  | 929  | 5.46277090161 |               |

|              |          |      |      |                |               |
|--------------|----------|------|------|----------------|---------------|
| NM_016207    | CPSF3    | 1279 | 1555 | 6.7846989965   |               |
| NM_016207    | CPSF3    | 447  | 530  | 5.7846989965   |               |
| NM_016205    | PDGFC    | 2755 | 2815 | 6.72246728409  |               |
| NM_016205    | PDGFC    | 569  | 646  | 6.72648487671  |               |
| NM_016205    | PDGFC    | 1316 | 1358 | 7.72246728409  |               |
| NM_016205    | PDGFC    | 2063 | 2108 | 6.72648464834  |               |
| NM_016205    | PDGFC    | 1051 | 1108 | 7.64234567488  |               |
| NM_016205    | PDGFC    | 1612 | 1672 | 8.72647815321  |               |
| NM_016205    | PDGFC    | 32   | 162  | 10.0484129791  |               |
| NM_016205    | PDGFC    | 790  | 879  | 8.72648487671  |               |
| NM_016205    | PDGFC    | 260  | 381  | 8.31144738498  |               |
| NM_016205    | PDGFC    | 906  | 976  | 6.72648487671  |               |
| NM_016200    | NAA38    | 199  | 611  | 8.8210795996   |               |
| NM_016201    | AMOTL2   | 2602 | 2672 | 8.631162476    |               |
| NM_016201    | AMOTL2   | 3991 | 4043 | 9.36812133912  |               |
| NM_016201    | AMOTL2   | 1548 | 1586 | 8.04218237511  |               |
| NM_016201    | AMOTL2   | 303  | 351  | 7.04619324423  |               |
| NM_016201    | AMOTL2   | 3285 | 3401 | 8.631162476    |               |
| NM_016201    | AMOTL2   | 3410 | 3474 | 8.04619996773  |               |
| NM_016201    | AMOTL2   | 3183 | 3283 | 8.04218237511  |               |
| NM_016201    | AMOTL2   | 3093 | 3181 | 8.631162476    |               |
| NM_016201    | AMOTL2   | 1422 | 1518 | 7.04619997528  |               |
| NM_016201    | AMOTL2   | 3743 | 3817 | 7.04619996773  |               |
| NM_016201    | AMOTL2   | 2828 | 2904 | 7.04619324423  |               |
| NM_001080975 | REPS2    | 47   | 86   | 11.7292299304  |               |
| NM_016209    | TRAPPC2L |      | 124  | 176            | 7.55866691088 |
| NM_016209    | TRAPPC2L |      | 499  | 628            | 6.82170131693 |
| NM_001249    | ENTPD5   | 1356 | 1416 | 4.87753229609  |               |
| NM_001249    | ENTPD5   | 517  | 634  | 8.13159650691  |               |
| NM_001249    | ENTPD5   | 448  | 501  | 5.9576539053   |               |
| NM_001249    | ENTPD5   | 335  | 373  | 5.9576539053   |               |
| NM_001249    | ENTPD5   | 1473 | 1552 | 4.96149775515  |               |
| NM_001249    | ENTPD5   | 1292 | 1356 | 6.54663400619  |               |
| NM_001249    | ENTPD5   | 1652 | 1717 | 4.96167150547  |               |
| NM_001249    | ENTPD5   | 1001 | 1177 | 8.42110312411  |               |
| NM_001249    | ENTPD5   | 790  | 920  | 7.28359960036  |               |
| NM_001539    | DNAJA1   | 314  | 356  | 0.684172149022 |               |
| NM_001539    | DNAJA1   | 713  | 810  | 1.76831135841  |               |
| NM_001539    | DNAJA1   | 522  | 713  | 4.46875107655  |               |
| NM_001539    | DNAJA1   | 841  | 1131 | 5.85577419966  |               |
| NM_001539    | DNAJA1   | 1171 | 1403 | 4.67520195401  |               |
| NM_001539    | DNAJA1   | 1409 | 1532 | 2.35327385913  |               |
| NM_001134479 | LRRRC8D  | 435  | 498  | 6.49782162034  |               |
| NM_001134479 | LRRRC8D  | 3119 | 3184 | 7.08279084456  |               |
| NM_001134479 | LRRRC8D  | 2749 | 2815 | 6.99865164273  |               |
| NM_001134479 | LRRRC8D  | 1948 | 2024 | 5.49782835139  |               |
| NM_001134479 | LRRRC8D  | 2538 | 2592 | 6.41368914201  |               |
| NM_001134479 | LRRRC8D  | 917  | 973  | 5.49782162034  |               |
| NM_001134479 | LRRRC8D  | 3259 | 3310 | 7.08279061619  |               |
| NM_001134479 | LRRRC8D  | 2846 | 2921 | 5.49381075122  |               |

|              |         |      |      |               |
|--------------|---------|------|------|---------------|
| NM_001134479 | LRR8D   | 2117 | 2212 | 6.49782835139 |
| NM_001134479 | LRR8D   | 1678 | 1843 | 7.08279085211 |
| NM_001134479 | LRR8D   | 1855 | 1924 | 7.08279085211 |
| NM_001134479 | LRR8D   | 683  | 747  | 6.49782835139 |
| NM_001530    | HIF1A   | 3245 | 3284 | 4.96928501894 |
| NM_001530    | HIF1A   | 2946 | 3012 | 6.96945876925 |
| NM_001530    | HIF1A   | 3429 | 3471 | 4.9694520382  |
| NM_001530    | HIF1A   | 3364 | 3418 | 4.9694587617  |
| NM_001530    | HIF1A   | 1038 | 1092 | 6.29138686414 |
| NM_001530    | HIF1A   | 3038 | 3116 | 4.96945876925 |
| NM_001530    | HIF1A   | 388  | 518  | 6.29138686414 |
| NM_001530    | HIF1A   | 3989 | 4056 | 4.96945876925 |
| NM_001530    | HIF1A   | 2345 | 2526 | 7.55442126997 |
| NM_001530    | HIF1A   | 3481 | 3526 | 3.96945853333 |
| NM_001530    | HIF1A   | 1957 | 2183 | 8.82743976438 |
| NM_001530    | HIF1A   | 2200 | 2340 | 7.42889038789 |
| NM_001530    | HIF1A   | 543  | 672  | 8.1393837707  |
| NM_001530    | HIF1A   | 678  | 860  | 7.96945876925 |
| NM_001530    | HIF1A   | 3663 | 3779 | 7.29138686414 |
| NM_001530    | HIF1A   | 3845 | 3948 | 6.29138686414 |
| NM_001530    | HIF1A   | 2585 | 2942 | 8.36177619203 |
| NM_001530    | HIF1A   | 906  | 1036 | 6.29138686414 |
| NM_001530    | HIF1A   | 147  | 358  | 7.42889038789 |
| NM_001530    | HIF1A   | 1099 | 1730 | 10.2362453099 |
| NM_001530    | HIF1A   | 1751 | 1924 | 6.96945876925 |
| NM_001532    | SLC29A2 | 904  | 939  | 9.42908186465 |
| NM_001532    | SLC29A2 | 2269 | 2302 | 11.0178882152 |
| NM_001532    | SLC29A2 | 2427 | 2504 | 12.4330994648 |
| NM_001532    | SLC29A2 | 813  | 897  | 12.2404543869 |
| NM_001532    | SLC29A2 | 2183 | 2240 | 10.4330994648 |
| NM_001532    | SLC29A2 | 72   | 126  | 10.4290818647 |
| NM_001532    | SLC29A2 | 2030 | 2102 | 11.7550275597 |
| NM_001532    | SLC29A2 | 2112 | 2162 | 10.4330994648 |
| NM_001532    | SLC29A2 | 1367 | 1462 | 11.7550275597 |
| NM_001532    | SLC29A2 | 959  | 1050 | 12.2404543869 |
| NM_001532    | SLC29A2 | 657  | 696  | 9.43309946482 |
| NM_001532    | SLC29A2 | 1757 | 1837 | 9.43309945728 |
| NM_001532    | SLC29A2 | 1526 | 1686 | 12.8925310835 |
| NM_001532    | SLC29A2 | 1068 | 1356 | 14.0180619655 |
| NM_001532    | SLC29A2 | 697  | 812  | 9.43309946483 |
| NM_001532    | SLC29A2 | 2305 | 2427 | 11.0180619655 |
| NM_001532    | SLC29A2 | 370  | 654  | 12.8925310835 |
| NM_001134476 | LRR8B   | 3713 | 3770 | 11.2771243745 |
| NM_001134476 | LRR8B   | 4083 | 4137 | 10.692155143  |
| NM_004016    | DMD     | 171  | 285  | 8.69391050836 |
| NM_001537    | HSBP1   | 783  | 869  | 2.75923511199 |
| NM_001537    | HSBP1   | 276  | 339  | 2.4373070171  |
| NM_001537    | HSBP1   | 531  | 573  | 2.02226278677 |
| NM_001537    | HSBP1   | 107  | 215  | 2.0222695176  |
| NM_001537    | HSBP1   | 586  | 759  | 3.24466193916 |

|           |         |      |      |                |
|-----------|---------|------|------|----------------|
| NM_198963 | DHX57   | 1290 | 1340 | 6.98452602086  |
| NM_198963 | DHX57   | 3130 | 3203 | 7.98452602086  |
| NM_198963 | DHX57   | 532  | 595  | 6.90440441165  |
| NM_198963 | DHX57   | 1521 | 1570 | 7.98853688998  |
| NM_007278 | GABARAP | 796  | 861  | 6.03257129066  |
| NM_007278 | GABARAP | 101  | 487  | 8.84009996304  |
| NM_007278 | GABARAP | 519  | 779  | 9.03274504098  |
| NM_181706 | DNAJC24 | 1515 | 1544 | 6.95697745236  |
| NM_007271 | STK38   | 2051 | 2102 | 5.44403849446  |
| NM_007271 | STK38   | 73   | 141  | 4.36391688525  |
| NM_007271 | STK38   | 1355 | 1409 | 5.44403849446  |
| NM_007271 | STK38   | 1288 | 1348 | 5.44403849446  |
| NM_007271 | STK38   | 1409 | 1478 | 6.44805609462  |
| NM_007271 | STK38   | 2731 | 2779 | 6.44805609463  |
| NM_007271 | STK38   | 3349 | 3464 | 6.76998418952  |
| NM_007271 | STK38   | 2374 | 2419 | 4.44403849446  |
| NM_007271 | STK38   | 2005 | 2049 | 4.44788234431  |
| NM_007271 | STK38   | 148  | 181  | 5.94887938597  |
| NM_007271 | STK38   | 2601 | 2636 | 5.36391688525  |
| NM_007271 | STK38   | 349  | 407  | 4.44403849446  |
| NM_007271 | STK38   | 2429 | 2525 | 4.44805609463  |
| NM_181701 | QS0X2   | 477  | 572  | 8.24055504992  |
| NM_181701 | QS0X2   | 2716 | 2766 | 6.65157494902  |
| NM_181701 | QS0X2   | 1725 | 1774 | 5.07063004847  |
| NM_181701 | QS0X2   | 1611 | 1687 | 6.07062981256  |
| NM_181701 | QS0X2   | 2306 | 2385 | 7.6555925492   |
| NM_181701 | QS0X2   | 1999 | 2073 | 8.24055504992  |
| NM_181701 | QS0X2   | 358  | 476  | 7.6555925492   |
| NM_181701 | QS0X2   | 1909 | 1956 | 6.65541879888  |
| NM_181701 | QS0X2   | 266  | 331  | 6.07063004847  |
| NM_181701 | QS0X2   | 3977 | 4038 | 6.07063004847  |
| NM_181701 | QS0X2   | 4166 | 4215 | 6.65157494902  |
| NM_181701 | QS0X2   | 1533 | 1575 | 7.07062331742  |
| NM_181701 | QS0X2   | 3308 | 3346 | 6.07063004847  |
| NM_181701 | QS0X2   | 1268 | 1383 | 8.53006166711  |
| NM_181701 | QS0X2   | 1146 | 1266 | 7.6555925492   |
| NM_181701 | QS0X2   | 1390 | 1530 | 8.07063004847  |
| NM_181701 | QS0X2   | 640  | 802  | 8.39255814336  |
| NM_181701 | QS0X2   | 807  | 948  | 8.39255814336  |
| NM_181701 | QS0X2   | 3458 | 3559 | 8.07063004847  |
| NM_181701 | QS0X2   | 2469 | 2543 | 6.07063004847  |
| NM_181701 | QS0X2   | 949  | 1146 | 8.97752064408  |
| NM_181701 | QS0X2   | 2787 | 2989 | 7.39255814336  |
| NM_181701 | QS0X2   | 2165 | 2263 | 5.07063004847  |
| NM_000777 | CYP3A5  | 450  | 543  | 10.2667054112  |
| NM_194247 | HNRNPA3 | 2735 | 2808 | 1.9711256038   |
| NM_194247 | HNRNPA3 | 4872 | 4947 | 0.386163103074 |
| NM_194247 | HNRNPA3 | 216  | 287  | 3.55608810452  |
| NM_194247 | HNRNPA3 | 1488 | 1550 | 3.38616310307  |
| NM_194247 | HNRNPA3 | 4996 | 5119 | 2.9711256038   |

|              |         |       |       |                 |
|--------------|---------|-------|-------|-----------------|
| NM_194247    | HNRNPA3 | 4213  | 4273  | 0.386163103074  |
| NM_194247    | HNRNPA3 | 289   | 373   | 2.9711256038    |
| NM_194247    | HNRNPA3 | 716   | 769   | 2.38616310307   |
| NM_194247    | HNRNPA3 | 63    | 99    | 2.70809096204   |
| NM_194247    | HNRNPA3 | 590   | 661   | 2.70809119796   |
| NM_194247    | HNRNPA3 | 2934  | 2985  | 0.382145502901  |
| NM_194247    | HNRNPA3 | 3819  | 3861  | 0.382145502901  |
| NM_194247    | HNRNPA3 | 1734  | 1793  | 0.382145502901  |
| NM_194247    | HNRNPA3 | 5122  | 5176  | 0.382145502901  |
| NM_194247    | HNRNPA3 | 4041  | 4072  | 0.30202389369   |
| NM_194247    | HNRNPA3 | 1834  | 1876  | 1.38616310285   |
| NM_194247    | HNRNPA3 | 901   | 970   | 1.38616310307   |
| NM_194247    | HNRNPA3 | 489   | 583   | 1.38616310307   |
| NM_194247    | HNRNPA3 | 385   | 483   | 2.70809119796   |
| NM_194247    | HNRNPA3 | 769   | 881   | 1.9711256038    |
| NM_194247    | HNRNPA3 | 5438  | 5495  | 0.382145502901  |
| NM_194247    | HNRNPA3 | 1098  | 1326  | 3.19351802513   |
| NM_194247    | HNRNPA3 | 974   | 1096  | 0.386163103074  |
| NM_194247    | HNRNPA3 | 5181  | 5306  | 2.38616310307   |
| NM_194247    | HNRNPA3 | 2193  | 2288  | 1.97112559625   |
| NM_194247    | HNRNPA3 | 2003  | 2189  | 3.70809119796   |
| NM_194247    | HNRNPA3 | 5506  | 5601  | 1.38616310307   |
| NM_194247    | HNRNPA3 | 1333  | 1405  | 0.386163103068  |
| NM_194247    | HNRNPA3 | 4735  | 4851  | 0.386163103074  |
| NM_001160148 | DDHD1   | 11806 | 11835 | 6.91143398666   |
| NM_001160148 | DDHD1   | 443   | 529   | 7.91143398666   |
| NM_000041    | APOE    | 1020  | 1089  | 1.1220492137    |
| NM_000041    | APOE    | 568   | 630   | 1.92940413576   |
| NM_000041    | APOE    | 70    | 134   | 2.70701171442   |
| NM_000041    | APOE    | 503   | 545   | -0.878124536614 |
| NM_000041    | APOE    | 135   | 193   | 0.122049213704  |
| NM_000041    | APOE    | 915   | 999   | 1.44397730859   |
| NM_000041    | APOE    | 757   | 876   | 0.707011714425  |
| NM_000041    | APOE    | 194   | 502   | 4.07624552409   |
| NM_000041    | APOE    | 650   | 749   | 0.707011714425  |
| NM_003977    | AIP     | 844   | 962   | 6.55974291024   |
| NM_003977    | AIP     | 679   | 722   | 4.15367560597   |
| NM_003977    | AIP     | 500   | 570   | 5.23781481536   |
| NM_003977    | AIP     | 571   | 663   | 5.82277731608   |
| NM_003977    | AIP     | 117   | 278   | 6.82277731608   |
| NM_003977    | AIP     | 730   | 819   | 6.82277731608   |
| NM_003972    | BTAF1   | 673   | 705   | 5.7654682781    |
| NM_003972    | BTAF1   | 5713  | 5766  | 7.35043750965   |
| NM_003972    | BTAF1   | 2846  | 2898  | 7.35043077882   |
| NM_003972    | BTAF1   | 5861  | 5924  | 5.76530125884   |
| NM_003972    | BTAF1   | 6491  | 6551  | 7.76530125884   |
| NM_003972    | BTAF1   | 5175  | 5262  | 6.76547500915   |
| NM_003972    | BTAF1   | 572   | 623   | 5.68133579977   |
| NM_003972    | BTAF1   | 3682  | 3746  | 5.68133579977   |
| NM_003972    | BTAF1   | 3457  | 3501  | 6.76530125884   |

|           |          |      |      |                   |
|-----------|----------|------|------|-------------------|
| NM_003972 | BTAF1    | 1651 | 1793 | 7.35043750988     |
| NM_003972 | BTAF1    | 2233 | 2292 | 6.7654682781      |
| NM_003972 | BTAF1    | 6394 | 6477 | 5.76547477324     |
| NM_003973 | RPL14    | 498  | 532  | -0.311861563533   |
| NM_003973 | RPL14    | 86   | 207  | 2.59503576313     |
| NM_003973 | RPL14    | 275  | 312  | -0.311861563533   |
| NM_003973 | RPL14    | 313  | 479  | 1.27310766824     |
| NM_020665 | TMEM27   | 1259 | 1323 | 9.89934391976     |
| NM_020665 | TMEM27   | 1505 | 1560 | 8.3143746882      |
| NM_020665 | TMEM27   | 1373 | 1417 | 9.89934391243     |
| NM_020665 | TMEM27   | 456  | 494  | 9.89917016966     |
| NM_020665 | TMEM27   | 498  | 1249 | 14.958237609      |
| NM_020665 | TMEM27   | 214  | 437  | 13.4018442605     |
| NM_020664 | DECR2    | 1049 | 1110 | 7.87867925775     |
| NM_020664 | DECR2    | 381  | 421  | 7.87466165759     |
| NM_020664 | DECR2    | 223  | 261  | 7.87466165759     |
| NM_020662 | MRS2     | 1031 | 1058 | 5.79707294394     |
| NM_020662 | MRS2     | 179  | 224  | 5.20809284327     |
| NM_020662 | MRS2     | 1168 | 1214 | 5.12797123406     |
| NM_020662 | MRS2     | 560  | 646  | 5.21211044344     |
| NM_024963 | FBXL18   | 3609 | 3645 | 10.7686762867     |
| NM_024963 | FBXL18   | 500  | 541  | 10.8528152602     |
| NM_024963 | FBXL18   | 7283 | 7352 | 11.8528154961     |
| NM_024963 | FBXL18   | 1493 | 1580 | 11.8528154961     |
| NM_024963 | FBXL18   | 7195 | 7225 | 10.8526417458     |
| NM_024963 | FBXL18   | 8081 | 8166 | 13.4377779968     |
| NM_024963 | FBXL18   | 4866 | 4929 | 10.8487978959     |
| NM_024963 | FBXL18   | 3947 | 4016 | 11.8528154959     |
| NM_024963 | FBXL18   | 7896 | 7974 | 12.4377777609     |
| NM_024963 | FBXL18   | 1096 | 1164 | 10.8487978959     |
| NM_024963 | FBXL18   | 865  | 976  | 11.8528154961     |
| NM_024963 | FBXL18   | 211  | 273  | 11.8528154885     |
| NM_024745 | SHCBP1   | 623  | 716  | 8.11931065527     |
| NM_024745 | SHCBP1   | 2144 | 2203 | 6.11913690495     |
| NM_024745 | SHCBP1   | 1301 | 1347 | 7.11529305509     |
| NM_024745 | SHCBP1   | 1774 | 1851 | 6.11931065527     |
| NM_024745 | SHCBP1   | 97   | 157  | 7.11930392421     |
| NM_024745 | SHCBP1   | 1350 | 1394 | 6.03517144588     |
| NM_024743 | UGT2A3   | 2000 | 2063 | 4.4131433611      |
| NM_024743 | UGT2A3   | 1126 | 1209 | 5.4131433611      |
| NM_024743 | UGT2A3   | 2348 | 2395 | 4.41314312519     |
| NM_024743 | UGT2A3   | 2    | 177  | 7.47203705016     |
| NM_024743 | UGT2A3   | 2131 | 2249 | 5.82818086038     |
| NM_024743 | UGT2A3   | 360  | 977  | 9.39803646871     |
| NM_024743 | UGT2A3   | 185  | 359  | 7.22049828316     |
| NM_024743 | UGT2A3   | 1209 | 1572 | 8.32003395671     |
| NM_024743 | UGT2A3   | 2464 | 2588 | 5.82818086038     |
| NM_024743 | UGT2A3   | 1030 | 1123 | 6.28761247902     |
| NM_024743 | UGT2A3   | 1577 | 1930 | 7.78237717077     |
| NM_001065 | TNFRSF1A |      | 643  | 713 6.34746792333 |



|              |             |      |      |               |
|--------------|-------------|------|------|---------------|
| NM_001065    | TNFRSF1A    | 87   | 133  | 6.34345705421 |
| NM_001065    | TNFRSF1A    | 818  | 870  | 6.34746792333 |
| NM_001065    | TNFRSF1A    | 366  | 432  | 7.34747465439 |
| NM_001065    | TNFRSF1A    | 738  | 785  | 6.34730090407 |
| NM_001065    | TNFRSF1A    | 933  | 970  | 7.34345705421 |
| NM_001065    | TNFRSF1A    | 1344 | 1397 | 7.34345705421 |
| NM_001065    | TNFRSF1A    | 1448 | 1488 | 6.263335445   |
| NM_001065    | TNFRSF1A    | 490  | 577  | 7.34747464684 |
| NM_001065    | TNFRSF1A    | 2057 | 2135 | 7.34747465439 |
| NM_001029998 | SLC10A7 881 | 943  |      | 9.19071726324 |
| NM_001029998 | SLC10A7 732 | 814  |      | 11.1908910135 |
| NM_017554    | PARP14 7402 | 7453 |      | 7.76195381045 |
| NM_017554    | PARP14 3676 | 3724 |      | 7.76596467957 |
| NM_017554    | PARP14 3140 | 3185 |      | 9.35093367542 |
| NM_017554    | PARP14 2743 | 2805 |      | 9.76597141061 |
| NM_017554    | PARP14 2528 | 2570 |      | 9.34691631117 |
| NM_017554    | PARP14 6673 | 6713 |      | 7.76195381045 |
| NM_017554    | PARP14 548  | 594  |      | 8.76596467957 |
| NM_017554    | PARP14 4343 | 4448 |      | 8.76597141061 |
| NM_017554    | PARP14 3398 | 3485 |      | 8.68183220124 |
| NM_017554    | PARP14 4605 | 4675 |      | 8.76597140307 |
| NM_017554    | PARP14 6105 | 6152 |      | 7.76195381045 |
| NM_017554    | PARP14 4527 | 4577 |      | 7.76596467957 |
| NM_017554    | PARP14 5156 | 5227 |      | 8.76596467957 |
| NM_017554    | PARP14 5319 | 5388 |      | 9.76597141062 |
| NM_017554    | PARP14 3836 | 3885 |      | 7.7659714104  |
| NM_017554    | PARP14 3076 | 3140 |      | 9.35093391112 |
| NM_017554    | PARP14 3906 | 3950 |      | 9.26679470196 |
| NM_017554    | PARP14 301  | 372  |      | 7.76596467957 |
| NM_017554    | PARP14 1551 | 1611 |      | 8.7657976603  |
| NM_017554    | PARP14 5918 | 5997 |      | 9.35093391134 |
| NM_017554    | PARP14 2181 | 2252 |      | 7.76597141062 |
| NM_173601    | GXYLT1 6445 | 6501 |      | 7.27928403063 |
| NM_173601    | GXYLT1 3403 | 3446 |      | 7.27911028054 |
| NM_173601    | GXYLT1 551  | 629  |      | 8.27928403085 |
| NM_173601    | GXYLT1 2255 | 2306 |      | 6.69432129421 |
| NM_173601    | GXYLT1 235  | 280  |      | 8.27928403085 |
| NM_173601    | GXYLT1 3913 | 4008 |      | 6.69432152258 |
| NM_173601    | GXYLT1 1892 | 1942 |      | 6.61018232075 |
| NM_173601    | GXYLT1 2728 | 2781 |      | 6.69030392996 |
| NM_173601    | GXYLT1 1348 | 1415 |      | 7.27928403085 |
| NM_173601    | GXYLT1 1700 | 1781 |      | 7.27911028054 |
| NM_173601    | GXYLT1 2160 | 2239 |      | 5.69432152258 |
| NM_173601    | GXYLT1 1417 | 1501 |      | 5.69432152258 |
| NM_173601    | GXYLT1 421  | 549  |      | 7.69432153013 |
| NM_173601    | GXYLT1 766  | 899  |      | 9.01624962502 |
| NM_173601    | GXYLT1 3228 | 3349 |      | 7.27928403085 |
| NM_173601    | GXYLT1 7208 | 7304 |      | 5.69414777981 |
| NM_173601    | GXYLT1 1537 | 1630 |      | 7.69432153013 |
| NM_173601    | GXYLT1 928  | 1121 |      | 8.86424653157 |

|           |          |      |      |               |               |
|-----------|----------|------|------|---------------|---------------|
| NM_173602 | DIP2B    | 7810 | 7880 | 6.9076042151  |               |
| NM_173602 | DIP2B    | 4053 | 4105 | 7.49658430844 |               |
| NM_173602 | DIP2B    | 4191 | 4304 | 6.91162181527 |               |
| NM_173602 | DIP2B    | 4996 | 5044 | 6.9076042151  |               |
| NM_173602 | DIP2B    | 6614 | 6673 | 5.9076042151  |               |
| NM_173602 | DIP2B    | 2889 | 2936 | 7.49658431599 |               |
| NM_173602 | DIP2B    | 1147 | 1246 | 8.23354991016 |               |
| NM_173602 | DIP2B    | 1501 | 1575 | 6.91161508422 |               |
| NM_173602 | DIP2B    | 7284 | 7332 | 5.82748260589 |               |
| NM_173602 | DIP2B    | 8035 | 8081 | 6.91144806495 |               |
| NM_173602 | DIP2B    | 1308 | 1358 | 5.91162157935 |               |
| NM_173602 | DIP2B    | 4131 | 4177 | 5.9076042151  |               |
| NM_173602 | DIP2B    | 8615 | 8664 | 7.91161508422 |               |
| NM_173602 | DIP2B    | 674  | 739  | 7.91162181527 |               |
| NM_173602 | DIP2B    | 776  | 851  | 7.49658431599 |               |
| NM_173602 | DIP2B    | 5774 | 5898 | 7.49658431599 |               |
| NM_173602 | DIP2B    | 975  | 1012 | 6.9076042151  |               |
| NM_173602 | DIP2B    | 531  | 651  | 8.49658431599 |               |
| NM_173602 | DIP2B    | 210  | 263  | 5.91162181527 |               |
| NM_173602 | DIP2B    | 1398 | 1431 | 5.82748260589 |               |
| NM_173602 | DIP2B    | 1018 | 1073 | 7.49657758494 |               |
| NM_173602 | DIP2B    | 3247 | 3323 | 8.49658431599 |               |
| NM_173602 | DIP2B    | 4617 | 4686 | 6.9076042151  |               |
| NM_173602 | DIP2B    | 2247 | 2273 | 7.49256671582 |               |
| NM_173602 | DIP2B    | 1621 | 1706 | 6.9076042151  |               |
| NM_173602 | DIP2B    | 4520 | 4583 | 7.91162180772 |               |
| NM_173602 | DIP2B    | 1896 | 2059 | 9.08154681671 |               |
| NM_173602 | DIP2B    | 3445 | 3503 | 6.91162181527 |               |
| NM_173602 | DIP2B    | 3332 | 3444 | 8.23354991016 |               |
| NM_173602 | DIP2B    | 2991 | 3121 | 7.91162181527 |               |
| NM_173602 | DIP2B    | 8486 | 8611 | 5.91162181527 |               |
| NM_173602 | DIP2B    | 1757 | 1895 | 8.49658431599 |               |
| NM_173602 | DIP2B    | 3600 | 3941 | 9.91162181527 |               |
| NM_173602 | DIP2B    | 4866 | 4946 | 7.91162181527 |               |
| NM_173602 | DIP2B    | 2065 | 2215 | 9.08154681671 |               |
| NM_173602 | DIP2B    | 7584 | 7653 | 5.91162180772 |               |
| NM_173602 | DIP2B    | 5189 | 5311 | 7.49658431599 |               |
| NM_173602 | DIP2B    | 2299 | 2855 | 10.9116218153 |               |
| NM_173602 | DIP2B    | 6129 | 6186 | 7.41244510661 |               |
| NM_173602 | DIP2B    | 4358 | 4520 | 8.23354991016 |               |
| NM_173602 | DIP2B    | 267  | 444  | 8.23354991016 |               |
| NM_014578 | RHOD     | 285  | 365  | 10.5970279543 |               |
| NM_173607 | FAM177A1 |      | 541  | 588           | 2.03687828193 |
| NM_014855 | KIAA0415 |      | 270  | 311           | 10.2137240504 |
| NM_014855 | KIAA0415 |      | 2799 | 2855          | 10.2138978007 |
| NM_014855 | KIAA0415 |      | 2063 | 2122          | 9.21389756482 |
| NM_014855 | KIAA0415 |      | 1793 | 1855          | 9.20988020056 |
| NM_014855 | KIAA0415 |      | 1196 | 1243          | 9.21372405042 |
| NM_014855 | KIAA0415 |      | 47   | 106           | 9.20988020056 |
| NM_014855 | KIAA0415 |      | 1283 | 1377          | 10.2138978007 |

|              |          |      |      |      |               |
|--------------|----------|------|------|------|---------------|
| NM_014855    | KIAA0415 |      | 1884 | 1953 | 10.7988603012 |
| NM_014855    | KIAA0415 |      | 728  | 836  | 10.2138978007 |
| NM_014855    | KIAA0415 |      | 1380 | 1481 | 11.5358258956 |
| NM_014855    | KIAA0415 |      | 5055 | 5175 | 9.21389780073 |
| NM_014855    | KIAA0415 |      | 5276 | 5348 | 10.2138910697 |
| NM_014855    | KIAA0415 |      | 5189 | 5245 | 9.21372405042 |
| NM_001080792 | C15orf57 |      | 158  | 201  | 8.10665842792 |
| NM_139030    | CD151    | 1328 | 1388 |      | 5.69126323428 |
| NM_139030    | CD151    | 727  | 937  |      | 8.19376357481 |
| NM_139030    | CD151    | 1044 | 1121 |      | 5.69126323428 |
| NM_139030    | CD151    | 37   | 724  |      | 9.59815382989 |
| NM_139030    | CD151    | 1171 | 1314 |      | 6.42822882844 |
| NM_052951    | DNTTIP1  | 968  | 1032 |      | 4.97193619274 |
| NM_139034    | MAPK7    | 649  | 709  |      | 11.7741989303 |
| NM_001105531 | FAM135A  | 2492 | 2522 |      | 6.85364110482 |
| NM_001105531 | FAM135A  | 5158 | 5230 |      | 7.85364110482 |
| NM_001105531 | FAM135A  | 5230 | 5289 |      | 8.93376271403 |
| NM_001105531 | FAM135A  | 3772 | 3850 |      | 8.52274280738 |
| NM_145918    | CTSL1    | 263  | 359  |      | 6.33086279289 |
| NM_145918    | CTSL1    | 991  | 1080 |      | 5.33086279289 |
| NM_145918    | CTSL1    | 497  | 669  |      | 6.55325521423 |
| NM_001105539 | ZBTB10   | 2853 | 2914 |      | 6.83463810678 |
| NM_207318    | FAM199X  | 2698 | 2760 |      | 6.96602587062 |
| NM_207318    | FAM199X  | 506  | 560  |      | 7.54697100709 |
| NM_207318    | FAM199X  | 600  | 674  |      | 7.55098859971 |
| NM_207318    | FAM199X  | 423  | 497  |      | 5.96601937549 |
| NM_001127181 | CENPL    | 1438 | 1496 |      | 11.0412947718 |
| NM_207311    | CCDC64   | 2879 | 2953 |      | 8.38618429145 |
| NM_207311    | CCDC64   | 714  | 754  |      | 8.30606268224 |
| NM_207311    | CCDC64   | 1457 | 1554 |      | 10.7121299865 |
| NM_207311    | CCDC64   | 759  | 892  |      | 9.39020189163 |
| NM_207311    | CCDC64   | 994  | 1135 |      | 8.39020189163 |
| NM_207311    | CCDC64   | 1264 | 1387 |      | 10.9751643923 |
| NM_207311    | CCDC64   | 308  | 561  |      | 11.1975568137 |
| NM_001127184 | CFLAR    | 600  | 647  |      | 3.76700621737 |
| NM_001127184 | CFLAR    | 716  | 791  |      | 5.76700622491 |
| NM_001127184 | CFLAR    | 273  | 353  |      | 4.76699949386 |
| NM_001127184 | CFLAR    | 534  | 598  |      | 4.7668324746  |
| NM_001127184 | CFLAR    | 358  | 516  |      | 6.57436114697 |
| NM_138924    | GAMT     | 352  | 525  |      | 7.79712389668 |
| NM_005534    | IFNGR2   | 965  | 1010 |      | 6.98965412222 |
| NM_005534    | IFNGR2   | 1695 | 1750 |      | 7.06977573143 |
| NM_005534    | IFNGR2   | 806  | 844  |      | 6.06977573143 |
| NM_005534    | IFNGR2   | 1899 | 2041 |      | 8.0737933316  |
| NM_005534    | IFNGR2   | 1031 | 1078 |      | 6.07379309568 |
| NM_005534    | IFNGR2   | 1523 | 1663 |      | 9.0737933316  |
| NM_005536    | IMPA1    | 1975 | 2037 |      | 5.53598826535 |
| NM_005536    | IMPA1    | 1009 | 1045 |      | 6.53197067272 |
| NM_005536    | IMPA1    | 1871 | 1938 |      | 5.45184906351 |
| NM_005826    | HNRNPR   | 2621 | 2686 |      | 3.39416196629 |

|           |         |      |      |               |
|-----------|---------|------|------|---------------|
| NM_005826 | HNRNPR  | 2226 | 2290 | 4.71609006872 |
| NM_005826 | HNRNPR  | 1100 | 1167 | 2.39416197384 |
| NM_005826 | HNRNPR  | 290  | 405  | 3.97912447456 |
| NM_005826 | HNRNPR  | 1531 | 1652 | 5.20151689589 |
| NM_005826 | HNRNPR  | 1172 | 1259 | 3.39416197384 |
| NM_005826 | HNRNPR  | 1725 | 1784 | 3.39014437366 |
| NM_005826 | HNRNPR  | 580  | 726  | 4.97912447456 |
| NM_005826 | HNRNPR  | 2391 | 2453 | 2.39416197361 |
| NM_005826 | HNRNPR  | 1950 | 2141 | 5.97912447456 |
| NM_005826 | HNRNPR  | 819  | 1060 | 5.56408697528 |
| NM_005826 | HNRNPR  | 506  | 567  | 3.39416197361 |
| NM_005827 | SLC35B1 | 150  | 220  | 9.34319126354 |
| NM_005827 | SLC35B1 | 503  | 575  | 8.92815376426 |
| NM_005827 | SLC35B1 | 87   | 150  | 8.66511935088 |
| NM_005827 | SLC35B1 | 287  | 491  | 9.92815376426 |
| NM_005827 | SLC35B1 | 838  | 1069 | 10.9281537643 |
| NM_005827 | SLC35B1 | 1129 | 1202 | 9.34319126354 |
| NM_005827 | SLC35B1 | 581  | 837  | 10.4306541048 |
| NM_005533 | IFI35   | 427  | 509  | 8.37769865321 |
| NM_005533 | IFI35   | 681  | 726  | 6.78871855232 |
| NM_005828 | DCAF7   | 4519 | 4572 | 5.46959532582 |
| NM_005828 | DCAF7   | 2595 | 2631 | 4.46942830656 |
| NM_005828 | DCAF7   | 2259 | 2318 | 4.46960205687 |
| NM_005828 | DCAF7   | 4010 | 4051 | 4.4655844567  |
| NM_005828 | DCAF7   | 142  | 194  | 4.4655844567  |
| NM_005828 | DCAF7   | 4688 | 4726 | 4.38546284749 |
| NM_005828 | DCAF7   | 1241 | 1290 | 5.46960182096 |
| NM_005828 | DCAF7   | 2425 | 2470 | 5.46942830656 |
| NM_005828 | DCAF7   | 6030 | 6078 | 5.46942830656 |
| NM_005828 | DCAF7   | 293  | 364  | 4.46960182096 |
| NM_005828 | DCAF7   | 3492 | 3558 | 6.05455782654 |
| NM_005828 | DCAF7   | 2375 | 2412 | 4.4655844567  |
| NM_005828 | DCAF7   | 780  | 849  | 6.0545645576  |
| NM_005828 | DCAF7   | 2698 | 2841 | 5.46960205688 |
| NM_005828 | DCAF7   | 663  | 769  | 5.46960205687 |
| NM_005828 | DCAF7   | 4984 | 5107 | 6.0545645576  |
| NM_005828 | DCAF7   | 448  | 508  | 5.4655844567  |
| NM_005828 | DCAF7   | 528  | 626  | 6.46960205688 |
| NM_005828 | DCAF7   | 5838 | 6010 | 5.46960205688 |
| NM_005828 | DCAF7   | 3056 | 3132 | 6.05456455005 |
| NM_005828 | DCAF7   | 3739 | 3893 | 5.46960205688 |
| NM_005829 | AP3S2   | 822  | 896  | 6.58255675594 |
| NM_005829 | AP3S2   | 738  | 778  | 7.16751253316 |
| NM_005829 | AP3S2   | 1063 | 1132 | 5.57853916332 |
| NM_005829 | AP3S2   | 1614 | 1705 | 5.58255676349 |
| NM_005829 | AP3S2   | 601  | 691  | 5.58238301317 |
| NM_005539 | INPP5A  | 871  | 923  | 8.766696562   |
| NM_005539 | INPP5A  | 740  | 800  | 7.85083577116 |
| NM_006320 | PGRMC2  | 1367 | 1445 | 5.09607832072 |
| NM_006320 | PGRMC2  | 2758 | 2854 | 6.31847097798 |

|              |         |      |      |               |
|--------------|---------|------|------|---------------|
| NM_006320    | PGRMC2  | 1465 | 1820 | 8.09607855664 |
| NM_006320    | PGRMC2  | 2062 | 2139 | 4.51111605591 |
| NM_006322    | TUBGCP3 | 221  | 271  | 7.3565915359  |
| NM_006322    | TUBGCP3 | 1016 | 1075 | 7.35274768605 |
| NM_006322    | TUBGCP3 | 1144 | 1207 | 6.27262607684 |
| NM_006322    | TUBGCP3 | 1208 | 1261 | 7.94172755102 |
| NM_006322    | TUBGCP3 | 2123 | 2180 | 8.3567650503  |
| NM_006322    | TUBGCP3 | 2351 | 2439 | 7.35274768605 |
| NM_006322    | TUBGCP3 | 327  | 371  | 6.35274768605 |
| NM_006322    | TUBGCP3 | 1463 | 1559 | 7.94172778672 |
| NM_006322    | TUBGCP3 | 1290 | 1349 | 7.35675855517 |
| NM_006322    | TUBGCP3 | 2486 | 2566 | 6.35675855517 |
| NM_006322    | TUBGCP3 | 1915 | 2028 | 8.35676528622 |
| NM_003791    | MBTPS1  | 1120 | 1198 | 6.94294533356 |
| NM_003791    | MBTPS1  | 1327 | 1373 | 5.85880612417 |
| NM_003791    | MBTPS1  | 3779 | 3835 | 4.35798259692 |
| NM_003791    | MBTPS1  | 4057 | 4121 | 6.67991092017 |
| NM_003791    | MBTPS1  | 238  | 303  | 5.35798259692 |
| NM_003791    | MBTPS1  | 2507 | 2571 | 5.35396523266 |
| NM_003791    | MBTPS1  | 2939 | 2976 | 5.35780908252 |
| NM_003791    | MBTPS1  | 1993 | 2039 | 5.35798282529 |
| NM_003791    | MBTPS1  | 2169 | 2229 | 4.35396523266 |
| NM_003791    | MBTPS1  | 2258 | 2305 | 4.27384362345 |
| NM_003791    | MBTPS1  | 2454 | 2507 | 5.94294533356 |
| NM_003791    | MBTPS1  | 935  | 976  | 4.35780908252 |
| NM_003791    | MBTPS1  | 1537 | 1583 | 4.35798259692 |
| NM_003791    | MBTPS1  | 548  | 729  | 6.35798283284 |
| NM_003791    | MBTPS1  | 3837 | 3915 | 5.35396523266 |
| NM_003791    | MBTPS1  | 3010 | 3140 | 5.94294533356 |
| NM_003791    | MBTPS1  | 391  | 438  | 4.35798282529 |
| NM_003791    | MBTPS1  | 1382 | 1486 | 6.35798283284 |
| NM_001172412 | VANGL1  | 685  | 732  | 7.19708624736 |
| NM_001172412 | VANGL1  | 1234 | 1283 | 7.1932423975  |
| NM_001172412 | VANGL1  | 822  | 881  | 8.78204874808 |
| NM_001172412 | VANGL1  | 1883 | 1959 | 8.19725326662 |
| NM_006325    | RAN     | 82   | 217  | 6.03174027008 |
| NM_006325    | RAN     | 784  | 1056 | 6.97729248606 |
| NM_006325    | RAN     | 7    | 79   | 2.86181526864 |
| NM_006325    | RAN     | 326  | 751  | 7.15949581728 |
| NM_006325    | RAN     | 221  | 320  | 4.73628438655 |
| NM_003794    | SNX4    | 836  | 884  | 3.41667294078 |
| NM_003794    | SNX4    | 2455 | 2523 | 4.41667316915 |
| NM_003794    | SNX4    | 709  | 767  | 3.41667294078 |
| NM_003794    | SNX4    | 980  | 1039 | 4.41667317648 |
| NM_003794    | SNX4    | 2257 | 2337 | 5.4166731767  |
| NM_006327    | TIMM23  | 1135 | 1183 | 4.72156129461 |
| NM_006327    | TIMM23  | 905  | 965  | 5.72156130216 |
| NM_006327    | TIMM23  | 615  | 670  | 5.30652380288 |
| NM_006327    | TIMM23  | 526  | 596  | 6.72156130216 |
| NM_006327    | TIMM23  | 765  | 845  | 5.72156130216 |

|              |         |      |      |               |
|--------------|---------|------|------|---------------|
| NM_006327    | TIMM23  | 1018 | 1134 | 6.52891622422 |
| NM_006327    | TIMM23  | 695  | 764  | 4.72156130194 |
| NM_006327    | TIMM23  | 378  | 500  | 6.72156130216 |
| NM_006327    | TIMM23  | 248  | 337  | 4.72156130216 |
| NM_006328    | RBM14   | 2440 | 2530 | 9.3179764748  |
| NM_006328    | RBM14   | 1863 | 1925 | 7.7289963739  |
| NM_006328    | RBM14   | 404  | 452  | 7.73284022376 |
| NM_006328    | RBM14   | 364  | 401  | 8.73301373816 |
| NM_006328    | RBM14   | 752  | 796  | 9.31395887462 |
| NM_006328    | RBM14   | 534  | 610  | 8.73301397407 |
| NM_006328    | RBM14   | 1930 | 2141 | 11.1924455927 |
| NM_006328    | RBM14   | 2598 | 2655 | 8.73301373816 |
| NM_006328    | RBM14   | 2776 | 2830 | 9.73300724302 |
| NM_006328    | RBM14   | 2269 | 2407 | 10.054942069  |
| NM_006328    | RBM14   | 137  | 205  | 7.64887476469 |
| NM_003798    | CTNNAL1 | 174  | 266  | 4.75851349402 |
| NM_003798    | CTNNAL1 | 938  | 1010 | 3.76235734388 |
| NM_003798    | CTNNAL1 | 1577 | 1644 | 5.34749358737 |
| NM_003798    | CTNNAL1 | 1172 | 1228 | 4.76235734388 |
| NM_003798    | CTNNAL1 | 1687 | 1759 | 4.76252436314 |
| NM_003798    | CTNNAL1 | 324  | 376  | 3.67839188481 |
| NM_003798    | CTNNAL1 | 2135 | 2235 | 5.34749358737 |
| NM_003798    | CTNNAL1 | 2300 | 2399 | 5.34749359492 |
| NM_003798    | CTNNAL1 | 1870 | 1985 | 6.56988601625 |
| NM_003798    | CTNNAL1 | 1777 | 1865 | 3.75851349402 |
| NM_003798    | CTNNAL1 | 1479 | 1555 | 6.08445918153 |
| NM_003798    | CTNNAL1 | 1231 | 1298 | 3.76252436314 |
| NM_003799    | RNMT    | 3868 | 3941 | 5.67533721396 |
| NM_001127453 | DFNA5   | 574  | 655  | 7.01964692412 |
| NM_001127453 | DFNA5   | 669  | 729  | 6.93550771473 |
| NM_001127453 | DFNA5   | 125  | 223  | 7.01964692412 |
| NM_001127453 | DFNA5   | 440  | 494  | 6.01562932394 |
| NM_001127453 | DFNA5   | 1281 | 1404 | 8.341575019   |
| NM_001127453 | DFNA5   | 1481 | 1580 | 7.01964692412 |
| NM_012097    | ARL5A   | 332  | 403  | 5.22929302355 |
| NM_012097    | ARL5A   | 695  | 761  | 4.81425552427 |
| NM_012097    | ARL5A   | 501  | 599  | 4.14516054522 |
| NM_001553    | IGFBP7  | 85   | 157  | 11.8285225752 |
| NM_006012    | CLPP    | 505  | 559  | 5.65302096303 |
| NM_006012    | CLPP    | 340  | 414  | 7.23798346375 |
| NM_002166    | ID2     | 282  | 336  | 4.86399584767 |
| NM_002166    | ID2     | 542  | 615  | 4.12703024596 |
| NM_002166    | ID2     | 1315 | 1375 | 3.53805015261 |
| NM_002166    | ID2     | 625  | 673  | 2.54206751687 |
| NM_002166    | ID2     | 758  | 849  | 2.54206775256 |
| NM_002166    | ID2     | 364  | 476  | 2.54206775279 |
| NM_032361    | THOC3   | 1249 | 1301 | 7.5586669111  |
| NM_032361    | THOC3   | 653  | 702  | 7.29545875495 |
| NM_032361    | THOC3   | 768  | 830  | 5.88956520099 |
| NM_032361    | THOC3   | 832  | 935  | 7.97370441038 |

|              |         |      |      |               |
|--------------|---------|------|------|---------------|
| NM_032361    | THOC3   | 202  | 264  | 6.55464931093 |
| NM_032361    | THOC3   | 1301 | 1505 | 7.78105933244 |
| NM_032361    | THOC3   | 354  | 606  | 8.5586669111  |
| NM_032360    | ACBD6   | 1309 | 1396 | 6.44481805439 |
| NM_007176    | C14orf1 | 1042 | 1130 | 6.18749529718 |
| NM_007176    | C14orf1 | 1336 | 1384 | 4.5985151963  |
| NM_007176    | C14orf1 | 452  | 502  | 6.18749506127 |
| NM_007176    | C14orf1 | 1213 | 1279 | 5.60253279647 |
| NM_007176    | C14orf1 | 1407 | 1467 | 4.5985151963  |
| NM_007176    | C14orf1 | 506  | 959  | 9.55672910686 |
| NM_032364    | DNAJC14 | 445  | 496  | 6.55712502883 |
| NM_032364    | DNAJC14 | 1134 | 1174 | 8.55729204809 |
| NM_032364    | DNAJC14 | 942  | 991  | 8.55328117897 |
| NM_032364    | DNAJC14 | 267  | 358  | 8.14226127986 |
| NM_032364    | DNAJC14 | 2424 | 2525 | 7.55729877914 |
| NM_014634    | PPM1F   | 685  | 762  | 10.1219126345 |
| NM_014634    | PPM1F   | 4831 | 4894 | 9.12191262692 |
| NM_032368    | LZIC    | 178  | 247  | 2.5616244115  |
| NM_032368    | LZIC    | 864  | 953  | 3.64575688983 |
| NM_032368    | LZIC    | 657  | 694  | 2.64174602071 |
| NM_032368    | LZIC    | 5    | 139  | 4.64576362089 |
| NM_152678    | FAM116A | 3389 | 3478 | 8.10218316404 |
| NM_139281    | WDR36   | 760  | 816  | 7.53913080858 |
| NM_139281    | WDR36   | 2583 | 2623 | 5.87002910602 |
| NM_139281    | WDR36   | 2732 | 2790 | 5.95416158435 |
| NM_139281    | WDR36   | 2003 | 2077 | 5.95416158435 |
| NM_139281    | WDR36   | 2092 | 2192 | 7.95416831541 |
| NM_139281    | WDR36   | 1267 | 1379 | 7.53913081613 |
| NM_139281    | WDR36   | 1877 | 1984 | 6.95416831541 |
| NM_139286    | CDC26   | 264  | 316  | 3.65914344366 |
| NM_139286    | CDC26   | 510  | 577  | 4.24410571601 |
| NM_001198569 | ATP6V0C | 51   | 97   | 4.71977960417 |
| NM_001198569 | ATP6V0C | 449  | 671  | 8.04188144938 |
| NM_001198569 | ATP6V0C | 179  | 272  | 5.45691894866 |
| NM_001198569 | ATP6V0C | 274  | 440  | 6.13499085377 |
| NM_001198569 | ATP6V0C | 672  | 986  | 8.49254285839 |
| NM_002813    | PSMD9   | 287  | 351  | 6.90580858349 |
| NM_002813    | PSMD9   | 760  | 826  | 5.90563483339 |
| NM_002813    | PSMD9   | 553  | 615  | 6.90179098353 |
| NM_002813    | PSMD9   | 1025 | 1079 | 6.82166937432 |
| NM_002813    | PSMD9   | 888  | 950  | 7.48675348426 |
| NM_006396    | SSSCA1  | 215  | 260  | 10.3270143208 |
| NM_001519    | BRF1    | 965  | 1019 | 6.91605402645 |
| NM_001039712 | DEDD    | 892  | 961  | 7.00146870029 |
| NM_001039712 | DEDD    | 353  | 405  | 6.99745133603 |
| NM_001003699 | RREB1   | 6883 | 6952 | 6.64528390091 |
| NM_001003699 | RREB1   | 6013 | 6058 | 7.64511688164 |
| NM_001003699 | RREB1   | 6571 | 6619 | 8.22623553251 |
| NM_001003699 | RREB1   | 6070 | 6141 | 8.96721872685 |
| NM_001003699 | RREB1   | 8137 | 8191 | 6.64511688164 |

|              |          |      |      |                   |
|--------------|----------|------|------|-------------------|
| NM_001003699 | RREB1    | 8394 | 8459 | 6.64511688164     |
| NM_001003699 | RREB1    | 1132 | 1187 | 8.23025313268     |
| NM_001003699 | RREB1    | 6175 | 6242 | 6.64127303179     |
| NM_001003699 | RREB1    | 7778 | 7815 | 7.64529063196     |
| NM_001003699 | RREB1    | 3408 | 3461 | 7.64127303179     |
| NM_001003699 | RREB1    | 8056 | 8107 | 8.23025289676     |
| NM_001003699 | RREB1    | 8485 | 8562 | 6.64511688164     |
| NM_001003699 | RREB1    | 3696 | 3738 | 7.56115142258     |
| NM_001003699 | RREB1    | 1320 | 1377 | 7.64529039604     |
| NM_001003699 | RREB1    | 6691 | 6769 | 7.64127303179     |
| NM_001003699 | RREB1    | 47   | 160  | 9.45264555402     |
| NM_001003699 | RREB1    | 7827 | 7880 | 7.64127303179     |
| NM_001003699 | RREB1    | 7591 | 7698 | 7.64529063196     |
| NM_177974    | CASC4    | 3551 | 3617 | 3.78932502044     |
| NM_177974    | CASC4    | 360  | 404  | 4.37428728547     |
| NM_177974    | CASC4    | 2084 | 2133 | 2.78932502067     |
| NM_177974    | CASC4    | 82   | 122  | 3.78915127035     |
| NM_177974    | CASC4    | 506  | 546  | 4.290148312       |
| NM_177974    | CASC4    | 1166 | 1226 | 4.37428079033     |
| NM_177974    | CASC4    | 1245 | 1370 | 5.11125311555     |
| NM_177974    | CASC4    | 966  | 1028 | 2.78931828961     |
| NM_177974    | CASC4    | 3002 | 3056 | 3.70518581128     |
| NM_177974    | CASC4    | 791  | 838  | 3.78915127035     |
| NM_177974    | CASC4    | 1887 | 1927 | 2.78932478475     |
| NM_177974    | CASC4    | 1371 | 1449 | 3.78932478475     |
| NM_014117    | C16orf72 |      | 735  | 877 4.91378377485 |
| NM_015578    | LSM14A   | 1036 | 1095 | 4.57961282743     |
| NM_015578    | LSM14A   | 3206 | 3281 | 3.57960609638     |
| NM_015578    | LSM14A   | 904  | 947  | 3.49547361805     |
| NM_015578    | LSM14A   | 2047 | 2184 | 6.74953782887     |
| NM_015578    | LSM14A   | 2581 | 2626 | 3.57559522726     |
| NM_015578    | LSM14A   | 127  | 173  | 3.57559522726     |
| NM_015578    | LSM14A   | 1312 | 1404 | 5.16457532815     |
| NM_015578    | LSM14A   | 206  | 430  | 6.90154092232     |
| NM_015578    | LSM14A   | 467  | 514  | 4.57559522726     |
| NM_015578    | LSM14A   | 2979 | 3073 | 5.57961282721     |
| NM_015578    | LSM14A   | 1504 | 1649 | 5.90154092232     |
| NM_015578    | LSM14A   | 1952 | 2039 | 4.57961282743     |
| NM_015578    | LSM14A   | 567  | 649  | 5.16457532815     |
| NM_015578    | LSM14A   | 1649 | 1729 | 3.57559522726     |
| NM_014681    | DHX34    | 1907 | 1948 | 7.4940897887      |
| NM_014681    | DHX34    | 289  | 375  | 7.57822899809     |
| NM_014681    | DHX34    | 3064 | 3180 | 8.57822899809     |
| NM_014681    | DHX34    | 1713 | 1800 | 9.16318476776     |
| NM_014681    | DHX34    | 3478 | 3620 | 9.16319149881     |
| NM_018671    | UNC45A   | 1296 | 1342 | 5.67120696482     |
| NM_018671    | UNC45A   | 787  | 843  | 7.67138071514     |
| NM_018671    | UNC45A   | 3216 | 3270 | 6.58724150575     |
| NM_018671    | UNC45A   | 398  | 470  | 5.67138071514     |
| NM_018671    | UNC45A   | 2358 | 2396 | 6.67138047922     |



|              |          |      |      |                   |
|--------------|----------|------|------|-------------------|
| NM_018671    | UNC45A   | 3001 | 3066 | 5.67120696482     |
| NM_018671    | UNC45A   | 2568 | 2621 | 6.67138071514     |
| NM_018671    | UNC45A   | 2909 | 3000 | 5.67138047922     |
| NM_018671    | UNC45A   | 2009 | 2101 | 5.67138071514     |
| NM_018671    | UNC45A   | 1784 | 1874 | 6.67138071514     |
| NM_018671    | UNC45A   | 1175 | 1229 | 6.67120696482     |
| NM_018671    | UNC45A   | 2690 | 2748 | 6.67138071513     |
| NM_018671    | UNC45A   | 942  | 1092 | 8.4787356372      |
| NM_018671    | UNC45A   | 1642 | 1687 | 6.58724150575     |
| NM_018671    | UNC45A   | 2763 | 2860 | 7.25634321586     |
| NM_018671    | UNC45A   | 611  | 748  | 8.4787356372      |
| NM_001142936 | DAGLB    | 1008 | 1107 | 10.930840941      |
| NM_001142936 | DAGLB    | 77   | 140  | 9.34587843269     |
| NM_001142936 | DAGLB    | 1987 | 2040 | 8.34186084006     |
| NM_001142936 | DAGLB    | 1262 | 1406 | 12.1532333623     |
| NM_001142936 | DAGLB    | 713  | 828  | 11.1532333623     |
| NM_001142936 | DAGLB    | 2402 | 2481 | 9.34587820432     |
| NM_001142936 | DAGLB    | 829  | 992  | 11.3458784402     |
| NM_001142936 | DAGLB    | 214  | 485  | 13.3000747506     |
| NM_001142936 | DAGLB    | 2211 | 2286 | 8.34587820432     |
| NM_001142936 | DAGLB    | 1781 | 1894 | 10.6678065351     |
| NM_001142936 | DAGLB    | 1593 | 1747 | 10.6678065351     |
| NM_001142936 | DAGLB    | 1432 | 1544 | 9.93084094096     |
| NM_002444    | MSN      | 535  | 583  | 9.52759134456     |
| NM_002444    | MSN      | 3749 | 3806 | 11.1966930547     |
| NM_002444    | MSN      | 3024 | 3088 | 10.611730318      |
| NM_002444    | MSN      | 745  | 825  | 10.6117305539     |
| NM_002444    | MSN      | 1797 | 1855 | 11.1966930547     |
| NM_002444    | MSN      | 976  | 1060 | 12.1966930547     |
| NM_002444    | MSN      | 3855 | 3918 | 10.611730318      |
| NM_002444    | MSN      | 222  | 251  | 9.61155680363     |
| NM_002444    | MSN      | 2119 | 2205 | 11.6117305539     |
| NM_002444    | MSN      | 3703 | 3738 | 10.6117305464     |
| NM_002444    | MSN      | 3276 | 3344 | 11.9336586488     |
| NM_002444    | MSN      | 1555 | 1623 | 9.6117305464      |
| NM_002444    | MSN      | 90   | 197  | 10.6117305539     |
| NM_002444    | MSN      | 307  | 462  | 11.6117305539     |
| NM_002444    | MSN      | 1966 | 2085 | 11.1966930547     |
| NM_002444    | MSN      | 2515 | 2589 | 9.61172382289     |
| NM_002444    | MSN      | 833  | 914  | 11.6117305539     |
| NM_002441    | MSH5     | 2687 | 2750 | 9.03969522508     |
| NM_005798    | TRIM13   | 536  | 598  | 6.73458524698     |
| NM_005792    | MPHOSPH6 |      | 354  | 424 4.52163163707 |
| NM_005793    | NME6     | 167  | 233  | 6.64639674701     |
| NM_052820    | COR02A   | 1894 | 1952 | 8.37970146996     |
| NM_052821    | WDR5     | 2934 | 3016 | 5.64588091993     |
| NM_052821    | WDR5     | 327  | 398  | 6.64588092747     |
| NM_052821    | WDR5     | 407  | 468  | 5.64588092747     |
| NM_052821    | WDR5     | 2269 | 2343 | 4.64570717716     |
| NM_052821    | WDR5     | 1554 | 1622 | 6.23084319228     |

|              |          |      |      |                    |
|--------------|----------|------|------|--------------------|
| NM_052821    | WDR5     | 2075 | 2116 | 4.64570717716      |
| NM_052821    | WDR5     | 2008 | 2054 | 4.6418633273       |
| NM_170726    | ALDH4A1  | 1399 | 1470 | 6.35258785069      |
| NM_170726    | ALDH4A1  | 2053 | 2115 | 5.34857025807      |
| NM_170726    | ALDH4A1  | 741  | 797  | 6.34857025807      |
| NM_170726    | ALDH4A1  | 485  | 543  | 5.35258112719      |
| NM_001130111 | FAM108A1 |      | 954  | 1011 7.37580817198 |
| NM_001130111 | FAM108A1 |      | 819  | 873 8.37982577216  |
| NM_001130111 | FAM108A1 |      | 402  | 460 9.70175386704  |
| NM_001130111 | FAM108A1 |      | 690  | 815 8.96478827288  |
| NM_033540    | MFN1     | 1656 | 1716 | 5.93308579577      |
| NM_033540    | MFN1     | 1068 | 1131 | 4.85296418656      |
| NM_033540    | MFN1     | 1257 | 1320 | 5.93308579577      |
| NM_033540    | MFN1     | 820  | 898  | 4.93692964562      |
| NM_033540    | MFN1     | 1874 | 1969 | 6.52206566074      |
| NM_033540    | MFN1     | 168  | 302  | 6.52206589666      |
| NM_001165994 | GDPD1    | 687  | 731  | 10.2838172212      |
| NM_033547    | INTS4    | 2128 | 2225 | 7.01650859349      |
| NM_033547    | INTS4    | 467  | 541  | 7.02051946261      |
| NM_033547    | INTS4    | 1938 | 2033 | 9.60548869439      |
| NM_033549    | TRIM41   | 2545 | 2568 | 7.36300048107      |
| NM_033018    | CDK16    | 1819 | 1863 | 4.2753183131       |
| NM_033018    | CDK16    | 2683 | 2729 | 5.27531854901      |
| NM_033018    | CDK16    | 2564 | 2611 | 5.2753185488       |
| NM_033018    | CDK16    | 1659 | 1714 | 5.27531854902      |
| NM_033018    | CDK16    | 1103 | 1164 | 4.27531181797      |
| NM_033018    | CDK16    | 2188 | 2239 | 4.2753185488       |
| NM_033018    | CDK16    | 1476 | 1564 | 5.86028104974      |
| NM_033018    | CDK16    | 842  | 895  | 5.19117933964      |
| NM_033018    | CDK16    | 1869 | 1950 | 4.2751447987       |
| NM_033018    | CDK16    | 2255 | 2290 | 4.27130094885      |
| NM_033018    | CDK16    | 1266 | 1322 | 5.86028104974      |
| NM_033018    | CDK16    | 998  | 1080 | 5.86028081382      |
| NM_004587    | RRBP1    | 1274 | 1346 | 4.00451375629      |
| NM_004587    | RRBP1    | 1232 | 1272 | 1.92037454691      |
| NM_004587    | RRBP1    | 1354 | 1421 | 3.5894760211       |
| NM_004587    | RRBP1    | 1433 | 1561 | 4.81186867835      |
| NM_004587    | RRBP1    | 3340 | 3434 | 4.00451375629      |
| NM_004587    | RRBP1    | 2092 | 2270 | 6.32644185118      |
| NM_004587    | RRBP1    | 3288 | 3328 | 1.92037454691      |
| NM_004587    | RRBP1    | 1598 | 1652 | 2.00049615612      |
| NM_004587    | RRBP1    | 3449 | 3557 | 2.00451375629      |
| NM_004587    | RRBP1    | 894  | 967  | 3.58947625702      |
| NM_004587    | RRBP1    | 613  | 802  | 5.9114043519       |
| NM_004587    | RRBP1    | 980  | 1183 | 5.32644185118      |
| NM_004587    | RRBP1    | 1784 | 1866 | 3.58947625702      |
| NM_004587    | RRBP1    | 2806 | 2993 | 4.32644185118      |
| NM_004587    | RRBP1    | 156  | 202  | 3.00049615612      |
| NM_004587    | RRBP1    | 413  | 612  | 6.00451375629      |
| NM_004587    | RRBP1    | 221  | 382  | 6.64836994607      |

|              |         |      |      |               |
|--------------|---------|------|------|---------------|
| NM_004587    | RRBP1   | 1912 | 2084 | 5.46394537493 |
| NM_004587    | RRBP1   | 3575 | 3709 | 4.32644185118 |
| NM_004587    | RRBP1   | 3017 | 3262 | 5.17443875774 |
| NM_004587    | RRBP1   | 2707 | 2794 | 3.00451375629 |
| NM_004587    | RRBP1   | 2373 | 2704 | 6.64836994607 |
| NM_001237    | CCNA2   | 689  | 814  | 7.79882060645 |
| NM_001237    | CCNA2   | 479  | 529  | 5.47688578051 |
| NM_001237    | CCNA2   | 2441 | 2495 | 5.47671876124 |
| NM_001237    | CCNA2   | 2388 | 2435 | 6.47287491139 |
| NM_001237    | CCNA2   | 1052 | 1106 | 5.47671876124 |
| NM_001207068 | BZW1    | 1130 | 1230 | 5.35789847448 |
| NM_001207068 | BZW1    | 765  | 849  | 5.09486406865 |
| NM_001207068 | BZW1    | 467  | 507  | 2.77293597354 |
| NM_001207068 | BZW1    | 1043 | 1124 | 4.77293597376 |
| NM_001207068 | BZW1    | 524  | 677  | 6.09486406865 |
| NM_001207068 | BZW1    | 856  | 990  | 4.35789847448 |
| NM_001207068 | BZW1    | 1346 | 1489 | 5.09486406865 |
| NM_001207068 | BZW1    | 235  | 466  | 6.52782347592 |
| NM_001207066 | CXADR   | 919  | 1005 | 8.26508299098 |
| NM_001207066 | CXADR   | 780  | 913  | 8.45772806892 |
| NM_001207066 | CXADR   | 1244 | 1342 | 6.77965616381 |
| NM_001207066 | CXADR   | 366  | 497  | 8.15816778706 |
| NM_001207066 | CXADR   | 498  | 531  | 6.03867296947 |
| NM_001207066 | CXADR   | 539  | 607  | 6.04269056209 |
| NM_001207066 | CXADR   | 1146 | 1240 | 7.45772806892 |
| NM_001207066 | CXADR   | 608  | 710  | 8.15816778706 |
| NM_000071    | CBS     | 2370 | 2468 | 5.75539616448 |
| NM_000071    | CBS     | 1835 | 1895 | 3.43329431928 |
| NM_000071    | CBS     | 2472 | 2567 | 6.01843057032 |
| NM_000071    | CBS     | 1724 | 1763 | 4.43329431928 |
| NM_000071    | CBS     | 608  | 683  | 5.75539616448 |
| NM_000071    | CBS     | 768  | 828  | 3.4334680696  |
| NM_000071    | CBS     | 2078 | 2134 | 5.01825682    |
| NM_000071    | CBS     | 938  | 973  | 4.43346783368 |
| NM_000071    | CBS     | 1647 | 1700 | 3.34932886021 |
| NM_000071    | CBS     | 1375 | 1451 | 5.01843057032 |
| NM_000071    | CBS     | 469  | 586  | 5.01843057032 |
| NM_000071    | CBS     | 1947 | 2012 | 5.01843057032 |
| NM_000071    | CBS     | 1076 | 1226 | 4.4334680696  |
| NM_001238    | CCNE1   | 1012 | 1055 | 7.80878221707 |
| NM_022100    | MRPS14  | 612  | 650  | 3.9076818518  |
| NM_022100    | MRPS14  | 540  | 580  | 5.49665522164 |
| NM_022100    | MRPS14  | 279  | 311  | 4.91152570165 |
| NM_022100    | MRPS14  | 112  | 162  | 4.91169944442 |
| NM_022100    | MRPS14  | 405  | 461  | 4.91169921605 |
| NM_022101    | CXorf56 | 439  | 476  | 6.51450453586 |
| NM_022101    | CXorf56 | 1226 | 1289 | 6.43438292665 |
| NM_022101    | CXorf56 | 191  | 241  | 6.51851540498 |
| NM_022101    | CXorf56 | 281  | 395  | 8.32587705809 |
| NM_022101    | CXorf56 | 984  | 1029 | 5.51852212849 |

|           |         |      |      |               |
|-----------|---------|------|------|---------------|
| NM_022101 | CXorf56 | 87   | 184  | 5.51852190012 |
| NM_022101 | CXorf56 | 562  | 657  | 7.10348463676 |
| NM_022101 | CXorf56 | 664  | 739  | 7.10331088644 |
| NM_021103 | TMSB10  | 22   | 454  | 5.01619181583 |
| NM_021101 | CLDN1   | 3275 | 3341 | 4.93146387874 |
| NM_021101 | CLDN1   | 153  | 1004 | 12.3277989017 |
| NM_021101 | CLDN1   | 1584 | 1777 | 9.2574095738  |
| NM_021101 | CLDN1   | 1469 | 1573 | 8.39491309755 |
| NM_021101 | CLDN1   | 2961 | 3078 | 8.10540648036 |
| NM_021101 | CLDN1   | 2839 | 2863 | 4.85134226953 |
| NM_021101 | CLDN1   | 1324 | 1448 | 7.2574095738  |
| NM_021101 | CLDN1   | 1866 | 2746 | 11.8779959843 |
| NM_021101 | CLDN1   | 9    | 124  | 5.93548147892 |
| NM_021101 | CLDN1   | 3089 | 3184 | 6.52044397964 |
| NM_021101 | CLDN1   | 1041 | 1123 | 8.10540648036 |
| NM_021100 | NFS1    | 1766 | 1849 | 6.03588466093 |
| NM_021100 | NFS1    | 375  | 476  | 8.03990226111 |
| NM_021100 | NFS1    | 1882 | 2053 | 8.03990226111 |
| NM_021105 | PLSCR1  | 1158 | 1251 | 7.98651859474 |
| NM_021105 | PLSCR1  | 763  | 829  | 7.31741688463 |
| NM_021105 | PLSCR1  | 1319 | 1351 | 6.39753849384 |
| NM_021109 | TMSB4X  | 17   | 531  | 8.3986988289  |
| NM_054022 | GOSR2   | 383  | 465  | 4.61099475257 |
| NM_054022 | GOSR2   | 164  | 241  | 5.60698388345 |
| NM_054022 | GOSR2   | 1209 | 1310 | 4.61100147608 |
| NM_019096 | GTPBP2  | 2214 | 2285 | 6.55445214534 |
| NM_019096 | GTPBP2  | 2643 | 2682 | 5.55445214534 |
| NM_019096 | GTPBP2  | 2683 | 2824 | 8.13942137712 |
| NM_019096 | GTPBP2  | 1931 | 1985 | 6.55445214534 |
| NM_019094 | NUDT4   | 991  | 1059 | 5.72989220486 |
| NM_019094 | NUDT4   | 3164 | 3220 | 4.40795737892 |
| NM_019094 | NUDT4   | 1714 | 1799 | 6.21531903204 |
| NM_019094 | NUDT4   | 1974 | 2039 | 3.40796410976 |
| NM_019094 | NUDT4   | 2631 | 2675 | 4.4039465098  |
| NM_019094 | NUDT4   | 786  | 832  | 4.4039465098  |
| NM_019094 | NUDT4   | 692  | 769  | 4.9929266107  |
| NM_019094 | NUDT4   | 1252 | 1291 | 3.4039465098  |
| NM_019094 | NUDT4   | 880  | 964  | 4.9929266107  |
| NM_019094 | NUDT4   | 2072 | 2127 | 4.32382490059 |
| NM_019094 | NUDT4   | 2370 | 2418 | 4.32382490059 |
| NM_019094 | NUDT4   | 595  | 686  | 5.40796410998 |
| NM_019094 | NUDT4   | 3719 | 3809 | 5.72989220464 |
| NM_019094 | NUDT4   | 2184 | 2274 | 4.40796410998 |
| NM_019095 | CRLS1   | 1142 | 1198 | 7.7794181488  |
| NM_019095 | CRLS1   | 486  | 518  | 7.19445564808 |
| NM_019095 | CRLS1   | 290  | 377  | 8.77941815634 |
| NM_019095 | CRLS1   | 1017 | 1057 | 7.19445564808 |
| NM_019095 | CRLS1   | 551  | 688  | 10.2819184969 |
| NM_019095 | CRLS1   | 737  | 842  | 9.36438065707 |
| NM_019095 | CRLS1   | 1767 | 1852 | 7.69527894696 |

|              |          |      |      |               |               |
|--------------|----------|------|------|---------------|---------------|
| NM_182488    | USP12    | 347  | 414  | 6.93012338191 |               |
| NM_017664    | ANKRD10  | 684  | 739  | 5.84495375908 |               |
| NM_017664    | ANKRD10  | 306  | 365  | 4.2599912659  |               |
| NM_017664    | ANKRD10  | 1002 | 1045 | 5.17585205652 |               |
| NM_017664    | ANKRD10  | 1594 | 1638 | 4.25597366573 |               |
| NM_017664    | ANKRD10  | 951  | 988  | 4.17585205652 |               |
| NM_017664    | ANKRD10  | 1820 | 1878 | 5.84495376663 |               |
| NM_017664    | ANKRD10  | 1298 | 1379 | 5.25998453485 |               |
| NM_017664    | ANKRD10  | 2155 | 2234 | 5.84495376663 |               |
| NM_017664    | ANKRD10  | 482  | 581  | 6.84495376663 |               |
| NM_017664    | ANKRD10  | 782  | 918  | 6.58191936079 |               |
| NM_017664    | ANKRD10  | 1119 | 1266 | 7.25999126591 |               |
| NM_001142798 | C17orf49 |      | 208  | 302           | 7.02002707003 |
| NM_001142798 | C17orf49 |      | 343  | 411           | 5.69809898247 |
| NM_001142798 | C17orf49 |      | 540  | 613           | 5.69792523237 |
| NM_001142798 | C17orf49 |      | 618  | 803           | 7.28306148341 |
| NM_004461    | FARSA    | 1078 | 1150 | 7.93917578089 |               |
| NM_004461    | FARSA    | 362  | 417  | 6.35019568    |               |
| NM_004461    | FARSA    | 1153 | 1225 | 7.35421328017 |               |
| NM_004461    | FARSA    | 1597 | 1655 | 6.35421304425 |               |
| NM_004461    | FARSA    | 516  | 584  | 6.35421328017 |               |
| NM_004461    | FARSA    | 1461 | 1506 | 6.35421304425 |               |
| NM_004461    | FARSA    | 1510 | 1544 | 6.35019568    |               |
| NM_004461    | FARSA    | 183  | 268  | 6.93917578089 |               |
| NM_004461    | FARSA    | 775  | 913  | 7.35421328017 |               |
| NM_004461    | FARSA    | 40   | 171  | 7.35421328017 |               |
| NM_004461    | FARSA    | 1726 | 1787 | 6.93916904984 |               |
| NM_004461    | FARSA    | 947  | 1043 | 6.35421328017 |               |
| NM_004461    | FARSA    | 1359 | 1432 | 5.35421328017 |               |
| NM_001940    | ATN1     | 3506 | 3579 | 7.61309964641 |               |
| NM_001940    | ATN1     | 765  | 824  | 6.61309964641 |               |
| NM_001940    | ATN1     | 1102 | 1153 | 8.19806214713 |               |
| NM_001940    | ATN1     | 4116 | 4172 | 9.19806214713 |               |
| NM_001940    | ATN1     | 643  | 691  | 6.60908204624 |               |
| NM_001940    | ATN1     | 3776 | 3827 | 8.19404454696 |               |
| NM_001940    | ATN1     | 3434 | 3489 | 8.11392293775 |               |
| NM_001940    | ATN1     | 3178 | 3277 | 8.19806214713 |               |
| NM_001940    | ATN1     | 4010 | 4067 | 7.61309963886 |               |
| NM_001940    | ATN1     | 1347 | 1425 | 8.61309964641 |               |
| NM_001940    | ATN1     | 2934 | 2980 | 8.52896043702 |               |
| NM_001943    | DSG2     | 3017 | 3056 | 5.20302033462 |               |
| NM_001943    | DSG2     | 4717 | 4796 | 4.78798933047 |               |
| NM_001943    | DSG2     | 3594 | 3627 | 4.20302706567 |               |
| NM_001943    | DSG2     | 633  | 716  | 6.37295206711 |               |
| NM_001943    | DSG2     | 3481 | 3555 | 5.20302706567 |               |
| NM_001943    | DSG2     | 4824 | 4869 | 3.11888785629 |               |
| NM_001943    | DSG2     | 568  | 633  | 4.20302706567 |               |
| NM_001943    | DSG2     | 4500 | 4575 | 4.20302706567 |               |
| NM_001943    | DSG2     | 3062 | 3127 | 4.78798956639 |               |
| NM_001943    | DSG2     | 4882 | 4931 | 4.20302706567 |               |

|           |       |      |      |                |
|-----------|-------|------|------|----------------|
| NM_001943 | DSG2  | 1313 | 1616 | 8.24742118503  |
| NM_001943 | DSG2  | 2870 | 2994 | 7.01038198773  |
| NM_001943 | DSG2  | 727  | 831  | 6.37295206711  |
| NM_001943 | DSG2  | 5118 | 5203 | 4.78798956639  |
| NM_001943 | DSG2  | 3127 | 3469 | 8.33231008261  |
| NM_001943 | DSG2  | 185  | 308  | 6.66245868431  |
| NM_001943 | DSG2  | 833  | 1146 | 7.95791456783  |
| NM_001943 | DSG2  | 1656 | 1809 | 7.45095457911  |
| NM_001943 | DSG2  | 1151 | 1296 | 6.66245868431  |
| NM_001943 | DSG2  | 2715 | 2869 | 6.78798956639  |
| NM_001943 | DSG2  | 309  | 544  | 7.10991766128  |
| NM_001943 | DSG2  | 5207 | 5286 | 4.20302706567  |
| NM_001943 | DSG2  | 2195 | 2715 | 8.62929182037  |
| NM_001943 | DSG2  | 1918 | 2170 | 7.72658902173  |
| NM_001943 | DSG2  | 3661 | 4155 | 8.72658902173  |
| NM_004462 | FDFT1 | 290  | 387  | 4.99700392577  |
| NM_004462 | FDFT1 | 1510 | 1643 | 5.5115770986   |
| NM_004462 | FDFT1 | 1735 | 1777 | 3.10550979433  |
| NM_004462 | FDFT1 | 1252 | 1507 | 6.77461150444  |
| NM_004462 | FDFT1 | 424  | 996  | 7.27711184496  |
| NM_004462 | FDFT1 | 996  | 1078 | 3.77461150444  |
| NM_012225 | NUBP2 | 439  | 481  | 7.26085441326  |
| NM_012225 | NUBP2 | 227  | 263  | 8.34498689159  |
| NM_004467 | FGL1  | 347  | 415  | 4.03446702643  |
| NM_004467 | FGL1  | 937  | 1027 | 5.18647011987  |
| NM_004467 | FGL1  | 789  | 933  | 5.25685944776  |
| NM_004467 | FGL1  | 1209 | 1246 | 0.864542017435 |
| NM_004467 | FGL1  | 1027 | 1208 | 6.2220940296   |
| NM_004467 | FGL1  | 25   | 213  | 4.56498174313  |
| NM_004467 | FGL1  | 422  | 777  | 6.38810398104  |
| NM_130787 | AP2A1 | 3223 | 3280 | 4.81757024237  |
| NM_130787 | AP2A1 | 1240 | 1298 | 6.81774398514  |
| NM_130787 | AP2A1 | 392  | 469  | 7.40270649341  |
| NM_130787 | AP2A1 | 502  | 559  | 6.81774399269  |
| NM_130787 | AP2A1 | 1885 | 1937 | 4.7336047833   |
| NM_130787 | AP2A1 | 1684 | 1751 | 5.81774399269  |
| NM_130787 | AP2A1 | 2623 | 2666 | 4.81773726163  |
| NM_130787 | AP2A1 | 3094 | 3164 | 4.81774399247  |
| NM_130787 | AP2A1 | 1772 | 1810 | 4.7336047833   |
| NM_130787 | AP2A1 | 241  | 334  | 5.81774399269  |
| NM_130787 | AP2A1 | 717  | 794  | 6.40270649341  |
| NM_130787 | AP2A1 | 1022 | 1095 | 6.40270649341  |
| NM_130787 | AP2A1 | 835  | 1003 | 8.13967208758  |
| NM_130787 | AP2A1 | 3034 | 3094 | 6.40270648586  |
| NM_130787 | AP2A1 | 2356 | 2581 | 8.13967208758  |
| NM_130787 | AP2A1 | 2863 | 2934 | 6.40270649341  |
| NM_130787 | AP2A1 | 1129 | 1203 | 5.81372639251  |
| NM_130787 | AP2A1 | 1373 | 1648 | 8.13967208758  |
| NM_001949 | E2F3  | 2181 | 2223 | 7.90999037257  |
| NM_001949 | E2F3  | 3895 | 3962 | 8.9941228509   |

|           |        |      |      |                 |
|-----------|--------|------|------|-----------------|
| NM_001949 | E2F3   | 1710 | 1749 | 8.99011198178   |
| NM_001949 | E2F3   | 4503 | 4581 | 9.99412958196   |
| NM_001949 | E2F3   | 2290 | 2358 | 7.99011198178   |
| NM_004468 | FHL3   | 1044 | 1093 | 7.27470772327   |
| NM_001494 | GDI2   | 361  | 426  | 3.62058068408   |
| NM_001494 | GDI2   | 289  | 347  | 2.29865258919   |
| NM_001494 | GDI2   | 2123 | 2160 | 2.88344133959   |
| NM_001494 | GDI2   | 572  | 642  | 3.88361508991   |
| NM_001494 | GDI2   | 1200 | 1312 | 4.62058068408   |
| NM_001494 | GDI2   | 151  | 268  | 3.29865258919   |
| NM_001494 | GDI2   | 1878 | 1950 | 2.88361508991   |
| NM_001494 | GDI2   | 2212 | 2412 | 5.2055431848    |
| NM_001494 | GDI2   | 494  | 565  | 3.29865258919   |
| NM_001494 | GDI2   | 1313 | 1497 | 4.75808420783   |
| NM_001494 | GDI2   | 654  | 1162 | 6.82221454525   |
| NM_001494 | GDI2   | 1516 | 1769 | 4.88361508991   |
| NM_001493 | GDI1   | 2216 | 2315 | 6.01813996803   |
| NM_001493 | GDI1   | 2101 | 2177 | 5.01813996803   |
| NM_001493 | GDI1   | 888  | 962  | 5.60310246875   |
| NM_001493 | GDI1   | 512  | 567  | 4.01813323698   |
| NM_001493 | GDI1   | 1470 | 1535 | 5.01813996781   |
| NM_001493 | GDI1   | 1185 | 1227 | 4.01813323698   |
| NM_001493 | GDI1   | 322  | 387  | 6.34006806292   |
| NM_001493 | GDI1   | 1715 | 1812 | 5.01813996803   |
| NM_001493 | GDI1   | 606  | 647  | 3.93400075865   |
| NM_001493 | GDI1   | 1895 | 1946 | 5.01813996048   |
| NM_001493 | GDI1   | 393  | 464  | 4.01796621772   |
| NM_001493 | GDI1   | 1059 | 1142 | 6.01813996048   |
| NM_001493 | GDI1   | 1563 | 1707 | 6.60310246875   |
| NM_016240 | SCARA3 | 368  | 409  | 6.14494754962   |
| NM_201413 | APP    | 1241 | 1330 | 4.54922480362   |
| NM_201413 | APP    | 24   | 84   | 1.9642623029    |
| NM_201413 | APP    | 1336 | 2325 | 8.42369392153   |
| NM_201413 | APP    | 2777 | 2939 | 6.05172514415   |
| NM_201413 | APP    | 2326 | 2772 | 7.35657972567   |
| NM_201413 | APP    | 107  | 1231 | 8.39889053053   |
| NM_201413 | APP    | 2943 | 3402 | 7.45611539923   |
| NM_000014 | A2M    | 792  | 1236 | 4.85619005581   |
| NM_000014 | A2M    | 709  | 769  | 0.0488351337533 |
| NM_000014 | A2M    | 1257 | 3739 | 7.90992203975   |
| NM_000014 | A2M    | 3739 | 4646 | 6.37975201187   |
| NM_000014 | A2M    | 23   | 704  | 5.73533566094   |
| NM_133476 | ZNF384 | 2514 | 2595 | 6.93047030361   |
| NM_133476 | ZNF384 | 917  | 979  | 6.92645270344   |
| NM_133476 | ZNF384 | 1991 | 2040 | 6.84633109423   |
| NM_133476 | ZNF384 | 1156 | 1211 | 5.92645270344   |
| NM_000016 | ACADM  | 1236 | 1316 | 4.51070579858   |
| NM_000016 | ACADM  | 1044 | 1116 | 5.09566852767   |
| NM_000544 | TAP2   | 1647 | 1695 | 8.43464801235   |
| NM_000544 | TAP2   | 116  | 211  | 9.65704716474   |

|              |          |      |      |                    |
|--------------|----------|------|------|--------------------|
| NM_000544    | TAP2     | 973  | 1023 | 8.84969223513      |
| NM_000544    | TAP2     | 1762 | 1844 | 9.4346547434       |
| NM_000544    | TAP2     | 35   | 104  | 8.43465473585      |
| NM_000544    | TAP2     | 2620 | 2670 | 6.84567464251      |
| NM_000544    | TAP2     | 2430 | 2472 | 7.84951849236      |
| NM_000544    | TAP2     | 1062 | 1243 | 10.3091238613      |
| NM_000544    | TAP2     | 1456 | 1644 | 9.84969224268      |
| NM_000544    | TAP2     | 1696 | 1761 | 7.84969224268      |
| NM_000544    | TAP2     | 211  | 398  | 9.84969224268      |
| NM_000544    | TAP2     | 1320 | 1452 | 8.4346547434       |
| NM_000544    | TAP2     | 2180 | 2391 | 10.0196172441      |
| NM_000544    | TAP2     | 695  | 914  | 10.3091238613      |
| NM_000544    | TAP2     | 414  | 691  | 11.0976197561      |
| NM_000545    | HNF1A    | 974  | 1021 | 6.65766065212      |
| NM_000545    | HNF1A    | 1578 | 1628 | 6.653649783        |
| NM_030930    | UNC93B1  | 1461 | 1560 | 10.8212990598      |
| NM_030930    | UNC93B1  | 462  | 517  | 9.82129905962      |
| NM_030930    | UNC93B1  | 1067 | 1115 | 8.82112530952      |
| NM_030930    | UNC93B1  | 774  | 928  | 10.9912240613      |
| NM_030930    | UNC93B1  | 1369 | 1458 | 8.82129905984      |
| NM_030930    | UNC93B1  | 1116 | 1230 | 9.82129905984      |
| NM_030930    | UNC93B1  | 615  | 686  | 7.82129882392      |
| NM_001137667 | CASP8AP2 |      | 6266 | 6312 6.89378347246 |
| NM_001137667 | CASP8AP2 |      | 2342 | 2379 6.89378347246 |
| NM_001137667 | CASP8AP2 |      | 5327 | 5366 6.80981801339 |
| NM_001137667 | CASP8AP2 |      | 4341 | 4428 6.8899396226  |
| NM_001137667 | CASP8AP2 |      | 1036 | 1158 6.89395049172 |
| NM_001137664 | ANAPC7   | 330  | 405  | 6.61658149898      |
| NM_001137664 | ANAPC7   | 467  | 538  | 6.5324422896       |
| NM_001137664 | ANAPC7   | 1428 | 1564 | 7.03161899826      |
| NM_001137664 | ANAPC7   | 638  | 722  | 7.35354709315      |
| NM_001137664 | ANAPC7   | 271  | 308  | 5.03144524794      |
| NM_001137664 | ANAPC7   | 1182 | 1314 | 7.35354709315      |
| NM_001137664 | ANAPC7   | 793  | 1078 | 8.61658149898      |
| NM_001137664 | ANAPC7   | 1113 | 1169 | 6.03161899071      |
| NM_006913    | RNF5     | 960  | 1024 | 7.50092712961      |
| NM_006913    | RNF5     | 727  | 771  | 7.91596462889      |
| NM_006913    | RNF5     | 209  | 257  | 7.50092689369      |
| NM_006913    | RNF5     | 616  | 663  | 6.91596439297      |
| NM_006913    | RNF5     | 257  | 302  | 5.91194702871      |
| NM_030935    | TSC22D4  | 346  | 390  | 7.92121517477      |
| NM_030935    | TSC22D4  | 419  | 506  | 7.8372497157       |
| NM_030935    | TSC22D4  | 1003 | 1094 | 8.92138892509      |
| NM_030935    | TSC22D4  | 2300 | 2352 | 7.91737132491      |
| NM_030937    | CCNL2    | 1330 | 1388 | 4.41039909766      |
| NM_030937    | CCNL2    | 2343 | 2380 | 3.41039909766      |
| NM_030937    | CCNL2    | 1914 | 2020 | 7.11101256612      |
| NM_030937    | CCNL2    | 1712 | 1822 | 5.41057284798      |
| NM_030937    | CCNL2    | 2123 | 2329 | 6.41057284798      |
| NM_030937    | CCNL2    | 492  | 671  | 5.73250094287      |



|           |         |       |       |               |
|-----------|---------|-------|-------|---------------|
| NM_030937 | CCNL2   | 743   | 804   | 4.41057284797 |
| NM_030937 | CCNL2   | 109   | 194   | 4.41056611693 |
| NM_030937 | CCNL2   | 849   | 966   | 3.41057284798 |
| NM_017946 | FKBP14  | 227   | 276   | 7.5781511454  |
| NM_017946 | FKBP14  | 4223  | 4266  | 7.5781511454  |
| NM_017946 | FKBP14  | 1369  | 1418  | 8.16328066539 |
| NM_017946 | FKBP14  | 2589  | 2665  | 6.57430729555 |
| NM_017946 | FKBP14  | 533   | 654   | 8.90025299061 |
| NM_017946 | FKBP14  | 280   | 395   | 9.16328739644 |
| NM_017946 | FKBP14  | 397   | 507   | 8.90025299061 |
| NM_017946 | FKBP14  | 167   | 227   | 7.57832488817 |
| NM_017946 | FKBP14  | 658   | 777   | 9.16328739644 |
| NM_017946 | FKBP14  | 2783  | 2894  | 7.57832489572 |
| NM_017947 | MOCOS   | 1812  | 1883  | 7.52284928275 |
| NM_017947 | MOCOS   | 1630  | 1693  | 8.52686015187 |
| NM_017944 | USP47   | 4602  | 4658  | 5.00697256986 |
| NM_017944 | USP47   | 4444  | 4517  | 4.00296170074 |
| NM_017944 | USP47   | 2833  | 2905  | 5.00296170074 |
| NM_003891 | PROZ    | 1367  | 1447  | 7.95678387759 |
| NM_003891 | PROZ    | 98    | 206   | 5.95678387759 |
| NM_003890 | FCGBP   | 15519 | 15621 | 11.5622595103 |
| NM_003890 | FCGBP   | 11253 | 11326 | 12.4781203009 |
| NM_203301 | FBX033  | 1626  | 1690  | 8.04473541487 |
| NM_203301 | FBX033  | 889   | 956   | 8.04473541487 |
| NM_203301 | FBX033  | 2185  | 2249  | 8.04857926473 |
| NM_203301 | FBX033  | 1326  | 1409  | 9.04875301505 |
| NM_203301 | FBX033  | 1050  | 1137  | 8.04874628399 |
| NM_003899 | ARHGEF7 | 800   | 869   | 8.76505522261 |
| NM_003899 | ARHGEF7 | 4285  | 4342  | 8.76504849155 |
| NM_003899 | ARHGEF7 | 3283  | 3346  | 7.76103762243 |
| NM_003899 | ARHGEF7 | 1932  | 2001  | 7.76504849155 |
| NM_003899 | ARHGEF7 | 463   | 535   | 8.34600012315 |
| NM_003899 | ARHGEF7 | 3812  | 3882  | 7.7650552226  |
| NM_003899 | ARHGEF7 | 3886  | 3945  | 7.76504849155 |
| NM_003898 | SYNJ2   | 4918  | 4975  | 4.01392660634 |
| NM_003898 | SYNJ2   | 7013  | 7074  | 5.01393333739 |
| NM_003898 | SYNJ2   | 6906  | 7011  | 6.01393333717 |
| NM_003898 | SYNJ2   | 3521  | 3578  | 4.01375958707 |
| NM_003898 | SYNJ2   | 3091  | 3184  | 5.59889583811 |
| NM_003898 | SYNJ2   | 2917  | 2969  | 4.01375958707 |
| NM_003898 | SYNJ2   | 3844  | 3915  | 5.59872208779 |
| NM_003898 | SYNJ2   | 2985  | 3081  | 5.01393333739 |
| NM_003898 | SYNJ2   | 1237  | 1328  | 6.01393333739 |
| NM_003898 | SYNJ2   | 505   | 591   | 6.59889583811 |
| NM_003898 | SYNJ2   | 6652  | 6749  | 5.01393333739 |
| NM_003898 | SYNJ2   | 764   | 853   | 5.01393333739 |
| NM_003898 | SYNJ2   | 2798  | 2874  | 5.01393310147 |
| NM_003898 | SYNJ2   | 4689  | 4856  | 5.01393333739 |
| NM_003898 | SYNJ2   | 1660  | 1803  | 6.82128825945 |
| NM_003898 | SYNJ2   | 2130  | 2246  | 5.01393333739 |

|              |         |      |      |               |
|--------------|---------|------|------|---------------|
| NM_003898    | SYNJ2   | 1121 | 1203 | 5.01393333738 |
| NM_003898    | SYNJ2   | 2332 | 2469 | 6.01393333739 |
| NM_003898    | SYNJ2   | 247  | 413  | 7.18385833883 |
| NM_003898    | SYNJ2   | 4316 | 4442 | 5.59889583811 |
| NM_003898    | SYNJ2   | 5469 | 5542 | 5.59889583789 |
| NM_003898    | SYNJ2   | 637  | 732  | 4.01392660634 |
| NM_017948    | NOL8    | 1435 | 1478 | 6.80215350487 |
| NM_017948    | NOL8    | 1566 | 1606 | 5.8862927067  |
| NM_004207    | SLC16A3 | 742  | 795  | 4.44674276246 |
| NM_004207    | SLC16A3 | 563  | 645  | 4.44674276268 |
| NM_004207    | SLC16A3 | 317  | 367  | 3.44674276268 |
| NM_004207    | SLC16A3 | 659  | 701  | 4.44674275513 |
| NM_004207    | SLC16A3 | 1325 | 1405 | 4.44673603163 |
| NM_004207    | SLC16A3 | 1210 | 1321 | 5.44674276268 |
| NM_004207    | SLC16A3 | 1783 | 1857 | 4.44674276268 |
| NM_004207    | SLC16A3 | 371  | 478  | 5.76867085757 |
| NM_004207    | SLC16A3 | 928  | 968  | 3.44272516251 |
| NM_004207    | SLC16A3 | 1543 | 1670 | 5.03170526341 |
| NM_004207    | SLC16A3 | 1986 | 2044 | 3.44656901237 |
| NM_004207    | SLC16A3 | 191  | 312  | 6.90617438132 |
| NM_004207    | SLC16A3 | 1422 | 1537 | 4.44674276268 |
| NM_004207    | SLC16A3 | 992  | 1109 | 6.25409768474 |
| NM_004200    | SYT7    | 1783 | 1827 | 7.03478692957 |
| NM_004200    | SYT7    | 2352 | 2483 | 7.03880452974 |
| NM_004200    | SYT7    | 599  | 670  | 7.03863077942 |
| NM_004200    | SYT7    | 4058 | 4105 | 8.53962782108 |
| NM_004203    | PKMYT1  | 1332 | 1381 | 9.7394786004  |
| NM_004203    | PKMYT1  | 1462 | 1536 | 11.3284587013 |
| NM_004203    | PKMYT1  | 1752 | 1820 | 10.7434962003 |
| NM_004203    | PKMYT1  | 1244 | 1305 | 11.3284587013 |
| NM_004203    | PKMYT1  | 1945 | 2111 | 11.7434962006 |
| NM_001165877 | ATP5L2  | 439  | 497  | 7.09107935411 |
| NM_004208    | AIFM1   | 1329 | 1437 | 6.40384421932 |
| NM_004208    | AIFM1   | 1788 | 1849 | 4.40384421932 |
| NM_004208    | AIFM1   | 214  | 267  | 5.40384421931 |
| NM_004208    | AIFM1   | 1452 | 1524 | 5.98880672004 |
| NM_004208    | AIFM1   | 1260 | 1312 | 4.40383748827 |
| NM_004208    | AIFM1   | 1932 | 2081 | 7.57376922076 |
| NM_004208    | AIFM1   | 837  | 984  | 7.57376922076 |
| NM_004208    | AIFM1   | 2138 | 2223 | 5.98880672004 |
| NM_004208    | AIFM1   | 993  | 1260 | 7.57376922076 |
| NM_004208    | AIFM1   | 615  | 789  | 7.21119914138 |
| NM_004208    | AIFM1   | 1563 | 1750 | 8.31073481493 |
| NM_004208    | AIFM1   | 337  | 574  | 7.57376922076 |
| NM_198551    | MIA3    | 4102 | 4146 | 4.37187806474 |
| NM_198551    | MIA3    | 90   | 172  | 6.37187806474 |
| NM_198551    | MIA3    | 4333 | 4418 | 5.37187807229 |
| NM_198551    | MIA3    | 500  | 594  | 5.37187807229 |
| NM_198551    | MIA3    | 4882 | 4951 | 5.95684033709 |
| NM_198551    | MIA3    | 4234 | 4303 | 6.69380616718 |

|              |          |      |      |               |               |
|--------------|----------|------|------|---------------|---------------|
| NM_198551    | MIA3     | 5596 | 5671 | 4.37187783637 |               |
| NM_198551    | MIA3     | 2933 | 2971 | 5.95684033709 |               |
| NM_198551    | MIA3     | 3702 | 3790 | 5.37187807229 |               |
| NM_198551    | MIA3     | 4162 | 4204 | 5.95282297284 |               |
| NM_198551    | MIA3     | 3856 | 3920 | 5.95684033709 |               |
| NM_198551    | MIA3     | 5036 | 5090 | 4.28773886291 |               |
| NM_198551    | MIA3     | 5444 | 5528 | 4.37187806474 |               |
| NM_198551    | MIA3     | 4613 | 4684 | 5.37187134124 |               |
| NM_198551    | MIA3     | 5829 | 5875 | 4.36786047212 |               |
| NM_198551    | MIA3     | 3479 | 3551 | 5.95684056546 |               |
| NM_198551    | MIA3     | 2973 | 3065 | 6.37187807229 |               |
| NM_198551    | MIA3     | 5354 | 5413 | 4.36786047212 |               |
| NM_198551    | MIA3     | 3577 | 3682 | 6.37187807229 |               |
| NM_198551    | MIA3     | 2426 | 2547 | 6.69380616718 |               |
| NM_198551    | MIA3     | 5100 | 5209 | 6.69380616718 |               |
| NM_001199262 | UCHL5    | 221  | 280  | 3.61306704736 |               |
| NM_001199262 | UCHL5    | 297  | 358  | 5.19802954808 |               |
| NM_001199262 | UCHL5    | 362  | 477  | 3.61307377819 |               |
| NM_001199262 | UCHL5    | 659  | 746  | 4.61307354249 |               |
| NM_001199260 | TOR1AIP2 |      | 2955 | 3026          | 7.73122975628 |
| NM_001199260 | TOR1AIP2 |      | 1235 | 1288          | 9.73122975628 |
| NM_001199260 | TOR1AIP2 |      | 5083 | 5149          | 7.64709727795 |
| NM_001199260 | TOR1AIP2 |      | 1628 | 1663          | 8.73122975628 |
| NM_001199260 | TOR1AIP2 |      | 316  | 393           | 10.5385914094 |
| NM_001199260 | TOR1AIP2 |      | 619  | 667           | 8.73123648711 |
| NM_001199260 | TOR1AIP2 |      | 5748 | 5809          | 8.73123648733 |
| NM_001199260 | TOR1AIP2 |      | 2718 | 2796          | 7.73106273701 |
| NM_001199260 | TOR1AIP2 |      | 6945 | 7093          | 9.73123648733 |
| NM_001199260 | TOR1AIP2 |      | 6244 | 6318          | 8.73123648733 |
| NM_001199260 | TOR1AIP2 |      | 2414 | 2456          | 8.72721888716 |
| NM_001199260 | TOR1AIP2 |      | 1779 | 1842          | 8.73123648733 |
| NM_001199260 | TOR1AIP2 |      | 1842 | 1877          | 8.64709727795 |
| NM_001199260 | TOR1AIP2 |      | 2557 | 2659          | 7.73123648733 |
| NM_001199260 | TOR1AIP2 |      | 4761 | 4817          | 8.64709727795 |
| NM_001199260 | TOR1AIP2 |      | 684  | 753           | 10.0531645822 |
| NM_001199260 | TOR1AIP2 |      | 4201 | 4262          | 7.72721888716 |
| NM_001199260 | TOR1AIP2 |      | 3274 | 3338          | 7.64709727795 |
| NM_001199260 | TOR1AIP2 |      | 754  | 864           | 9.73123648733 |
| NM_001199260 | TOR1AIP2 |      | 5231 | 5294          | 7.73123648733 |
| NM_001199260 | TOR1AIP2 |      | 1413 | 1523          | 10.7312364873 |
| NM_001199260 | TOR1AIP2 |      | 6485 | 6575          | 9.73123648711 |
| NM_001199260 | TOR1AIP2 |      | 865  | 962           | 7.73123648711 |
| NM_001199260 | TOR1AIP2 |      | 406  | 494           | 8.73123648733 |
| NM_001199260 | TOR1AIP2 |      | 50   | 188           | 9.73123648733 |
| NM_001199260 | TOR1AIP2 |      | 1879 | 2177          | 12.0531645822 |
| NM_001199260 | TOR1AIP2 |      | 5399 | 5487          | 9.73123648733 |
| NM_022817    | PER2     | 3915 | 3941 | 8.41354242178 |               |
| NM_022817    | PER2     | 5377 | 5413 | 7.41354242178 |               |
| NM_022817    | PER2     | 5480 | 5573 | 7.41756002195 |               |
| NM_022818    | MAP1LC3B |      | 629  | 691           | 4.4957924924  |

|              |              |      |      |               |
|--------------|--------------|------|------|---------------|
| NM_022818    | MAP1LC3B     | 1612 | 1669 | 3.91065624159 |
| NM_022818    | MAP1LC3B     | 269  | 311  | 2.91082326085 |
| NM_022818    | MAP1LC3B     | 799  | 849  | 3.82669078252 |
| NM_022818    | MAP1LC3B     | 2004 | 2095 | 4.91082999191 |
| NM_001024213 | S100A13 292  | 374  |      | 6.76161886916 |
| NM_015159    | FAM168A 5944 | 5982 |      | 6.96223809067 |
| NM_015159    | FAM168A 3556 | 3648 |      | 5.88211648146 |
| NM_015159    | FAM168A 5500 | 5536 |      | 5.88211648146 |
| NM_015159    | FAM168A 6774 | 6890 |      | 7.55121819156 |
| NM_025176    | NINL 1721    | 1762 |      | 5.85151550649 |
| NM_025176    | NINL 241     | 318  |      | 5.85553309912 |
| NM_020414    | DDX24 1774   | 1870 |      | 7.91412362095 |
| NM_020414    | DDX24 2802   | 2869 |      | 4.10676869134 |
| NM_020414    | DDX24 578    | 613  |      | 4.02262948951 |
| NM_020414    | DDX24 1680   | 1717 |      | 5.10676869134 |
| NM_020414    | DDX24 1316   | 1461 |      | 7.91412362095 |
| NM_020414    | DDX24 625    | 691  |      | 5.69173119961 |
| NM_020414    | DDX24 1556   | 1662 |      | 5.10676869889 |
| NM_020414    | DDX24 1464   | 1556 |      | 6.91412362095 |
| NM_020414    | DDX24 326    | 544  |      | 6.10676869889 |
| NM_020414    | DDX24 2685   | 2761 |      | 6.69173119961 |
| NM_020414    | DDX24 1050   | 1149 |      | 5.69173119961 |
| NM_020414    | DDX24 903    | 1043 |      | 6.69173119961 |
| NM_020414    | DDX24 692    | 855  |      | 6.91412362095 |
| NM_020414    | DDX24 2089   | 2205 |      | 6.69173119961 |
| NM_020414    | DDX24 1870   | 2055 |      | 7.42869679378 |
| NM_020414    | DDX24 129    | 284  |      | 7.56620031753 |
| NM_020414    | DDX24 22     | 89   |      | 5.69173119206 |
| NM_020414    | DDX24 2252   | 2488 |      | 7.80720841703 |
| NM_020414    | DDX24 1150   | 1298 |      | 7.56620031753 |
| XM_372741    | LOC390956    | 401  | 437  | 7.66510052639 |
| XM_372741    | LOC390956    | 178  | 278  | 9.78057774381 |
| NM_020410    | ATP13A1 3146 | 3252 |      | 11.0429938092 |
| NM_020410    | ATP13A1 762  | 837  |      | 10.9275165918 |
| NM_020410    | ATP13A1 1763 | 1859 |      | 10.1499090131 |
| NM_020410    | ATP13A1 1108 | 1180 |      | 7.34255408351 |
| NM_020410    | ATP13A1 341  | 407  |      | 9.66448218594 |
| NM_020410    | ATP13A1 2622 | 2709 |      | 9.34255409105 |
| NM_020410    | ATP13A1 3278 | 3334 |      | 8.92751635586 |
| NM_020410    | ATP13A1 1318 | 1371 |      | 8.34255409105 |
| NM_020410    | ATP13A1 202  | 254  |      | 7.33853649088 |
| NM_020410    | ATP13A1 2982 | 3024 |      | 8.34254736    |
| NM_020410    | ATP13A1 2559 | 2614 |      | 8.34255408351 |
| NM_020410    | ATP13A1 2823 | 2880 |      | 7.34255409083 |
| NM_020410    | ATP13A1 1381 | 1661 |      | 11.4300169323 |
| NM_020410    | ATP13A1 1000 | 1101 |      | 7.34255409105 |
| NM_020410    | ATP13A1 3060 | 3144 |      | 9.92751659178 |
| NM_020410    | ATP13A1 2492 | 2552 |      | 7.33853649088 |
| NM_020410    | ATP13A1 449  | 568  |      | 9.66448218594 |
| NM_020410    | ATP13A1 1896 | 2037 |      | 10.1499090131 |

|           |         |      |      |               |
|-----------|---------|------|------|---------------|
| NM_020410 | ATP13A1 | 2152 | 2265 | 9.92751659178 |
| NM_020410 | ATP13A1 | 1228 | 1287 | 7.34254736    |
| NM_020410 | ATP13A1 | 3391 | 3661 | 11.1499090131 |
| NM_020410 | ATP13A1 | 860  | 1000 | 10.3425540911 |
| NM_020410 | ATP13A1 | 1664 | 1754 | 7.34255409105 |
| NM_020410 | ATP13A1 | 643  | 752  | 9.66448218594 |
| NM_025179 | PLXNA2  | 1175 | 1195 | 10.1316017535 |
| NM_025179 | PLXNA2  | 1792 | 1834 | 10.2157342318 |
| NM_025179 | PLXNA2  | 3059 | 3105 | 11.1316017535 |
| NM_025179 | PLXNA2  | 4173 | 4221 | 11.2157342318 |
| NM_025179 | PLXNA2  | 5213 | 5293 | 10.2157409628 |
| NM_025179 | PLXNA2  | 1429 | 1503 | 11.2157342318 |
| NM_025179 | PLXNA2  | 2091 | 2193 | 11.2157409626 |
| NM_025179 | PLXNA2  | 852  | 919  | 10.2117233627 |
| NM_025179 | PLXNA2  | 2296 | 2358 | 10.2157409628 |
| NM_025179 | PLXNA2  | 4055 | 4115 | 11.2117233627 |
| NM_016545 | IER5    | 1585 | 1688 | 11.4566872336 |
| NM_016546 | C1RL    | 1014 | 1095 | 7.13556515122 |
| NM_016546 | C1RL    | 1489 | 1599 | 7.1395827514  |
| NM_016546 | C1RL    | 1345 | 1402 | 7.13556515122 |
| NM_016546 | C1RL    | 514  | 571  | 8.13957602034 |
| NM_016546 | C1RL    | 296  | 470  | 9.94693767345 |
| NM_016546 | C1RL    | 146  | 199  | 8.7245450162  |
| NM_016546 | C1RL    | 1200 | 1312 | 9.72454525212 |
| NM_016546 | C1RL    | 68   | 137  | 7.13556515122 |
| NM_144981 | IMMP1L  | 248  | 288  | 11.0662126626 |
| NM_016542 | MST4    | 1025 | 1124 | 4.92666131017 |
| NM_016542 | MST4    | 1144 | 1218 | 3.92682832943 |
| NM_016542 | MST4    | 674  | 742  | 3.92281746031 |
| NM_016542 | MST4    | 3049 | 3133 | 3.92281746031 |
| NM_016542 | MST4    | 2778 | 2845 | 4.92683506048 |
| NM_024884 | L2HGDH  | 4177 | 4322 | 9.34611161996 |
| NM_024884 | L2HGDH  | 4350 | 4408 | 8.76114888332 |
| NM_024884 | L2HGDH  | 4412 | 4532 | 7.76114911924 |
| NM_024881 | SLC35E1 | 3933 | 3972 | 6.58602894784 |
| NM_024881 | SLC35E1 | 3698 | 3756 | 8.17099122019 |
| NM_024881 | SLC35E1 | 857  | 923  | 8.58602895539 |
| NM_024881 | SLC35E1 | 2872 | 2924 | 6.58585520507 |
| NM_024881 | SLC35E1 | 700  | 776  | 8.58602895539 |
| NM_024881 | SLC35E1 | 4321 | 4373 | 7.58602222434 |
| NM_024881 | SLC35E1 | 1068 | 1114 | 6.58201135522 |
| NM_024881 | SLC35E1 | 1610 | 1659 | 6.58602222434 |
| NM_024881 | SLC35E1 | 3619 | 3684 | 7.50188974601 |
| NM_024881 | SLC35E1 | 2677 | 2727 | 7.58602222434 |
| NM_024881 | SLC35E1 | 642  | 699  | 7.58602895539 |
| NM_024881 | SLC35E1 | 1481 | 1545 | 7.58602894784 |
| NM_024881 | SLC35E1 | 3473 | 3509 | 8.90795705027 |
| NM_024881 | SLC35E1 | 1411 | 1465 | 7.50188974601 |
| NM_024881 | SLC35E1 | 2030 | 2086 | 8.58602895539 |
| NM_024881 | SLC35E1 | 4017 | 4086 | 6.58201135522 |

|           |          |      |      |                    |
|-----------|----------|------|------|--------------------|
| NM_024881 | SLC35E1  | 3232 | 3305 | 7.58602895517      |
| NM_024881 | SLC35E1  | 777  | 851  | 8.90795705028      |
| NM_024881 | SLC35E1  | 3516 | 3603 | 8.58602895539      |
| NM_024881 | SLC35E1  | 4562 | 4609 | 6.58201135522      |
| NM_024881 | SLC35E1  | 564  | 636  | 7.58602894784      |
| NM_024881 | SLC35E1  | 1145 | 1388 | 9.17099145611      |
| NM_024881 | SLC35E1  | 2771 | 2872 | 8.17099145611      |
| NM_024881 | SLC35E1  | 148  | 218  | 8.17099122019      |
| NM_024881 | SLC35E1  | 2143 | 2258 | 9.17099145611      |
| NM_024881 | SLC35E1  | 3787 | 3846 | 8.17081770579      |
| NM_024881 | SLC35E1  | 3374 | 3456 | 7.58585520507      |
| NM_144988 | ALG14    | 302  | 341  | 8.44088043597      |
| NM_144988 | ALG14    | 423  | 451  | 8.36075882676      |
| NM_144988 | ALG14    | 166  | 197  | 8.36075882676      |
| NM_144988 | ALG14    | 473  | 582  | 9.44489803613      |
| NM_015897 | PIAS4    | 429  | 496  | 7.8697430462       |
| NM_015897 | PIAS4    | 143  | 209  | 6.95387552453      |
| NM_015897 | PIAS4    | 1050 | 1112 | 7.8697430462       |
| NM_015897 | PIAS4    | 754  | 845  | 7.95388224804      |
| NM_015895 | GMNN     | 1040 | 1085 | 2.20875573908      |
| NM_015895 | GMNN     | 906  | 954  | 3.53085758428      |
| NM_015895 | GMNN     | 964  | 1033 | 3.2089294894       |
| NM_015895 | GMNN     | 80   | 127  | 1.12479028001      |
| NM_015895 | GMNN     | 623  | 725  | 2.79389199012      |
| NM_015895 | GMNN     | 225  | 271  | 2.20491188922      |
| NM_015895 | GMNN     | 739  | 792  | 2.20892948185      |
| NM_015895 | GMNN     | 382  | 474  | 3.53085758428      |
| NM_015895 | GMNN     | 795  | 898  | 4.37885449084      |
| NM_175854 | PAN3     | 3107 | 3173 | 8.70723691648      |
| NM_017491 | WDR1     | 2994 | 3090 | 6.01572617257      |
| NM_017491 | WDR1     | 920  | 972  | 3.20837125051      |
| NM_017491 | WDR1     | 2231 | 2305 | 6.5302993454       |
| NM_017491 | WDR1     | 2771 | 2840 | 3.20837125051      |
| NM_017491 | WDR1     | 848  | 890  | 5.5302993454       |
| NM_017491 | WDR1     | 2844 | 2890 | 5.79333375123      |
| NM_017491 | WDR1     | 2895 | 2974 | 5.5302993454       |
| NM_017491 | WDR1     | 362  | 467  | 4.79333375123      |
| NM_017491 | WDR1     | 978  | 1156 | 7.11526184612      |
| NM_017491 | WDR1     | 1229 | 1362 | 6.79333375123      |
| NM_017491 | WDR1     | 2633 | 2765 | 7.20837125051      |
| NM_017491 | WDR1     | 1665 | 1752 | 4.79333375123      |
| NM_017491 | WDR1     | 1822 | 2212 | 8.49377346938      |
| NM_017491 | WDR1     | 488  | 748  | 7.29583409176      |
| NM_017491 | WDR1     | 1382 | 1618 | 7.01572617257      |
| NM_017491 | WDR1     | 2479 | 2595 | 5.5302993454       |
| NM_145055 | C18orf25 |      | 3291 | 3339 7.60451409776 |
| NM_145055 | C18orf25 |      | 336  | 381 8.18563274862  |
| NM_015898 | ZBTB7A   | 2038 | 2110 | 9.14911470588      |
| NM_015898 | ZBTB7A   | 2760 | 2806 | 7.14910797505      |
| NM_015898 | ZBTB7A   | 289  | 452  | 8.73407720683      |

|              |         |      |      |               |
|--------------|---------|------|------|---------------|
| NM_015898    | ZBTB7A  | 3304 | 3342 | 7.14509710593 |
| NM_015898    | ZBTB7A  | 1745 | 1823 | 8.14911470611 |
| NM_015898    | ZBTB7A  | 3493 | 3571 | 8.73390345651 |
| NM_015898    | ZBTB7A  | 553  | 623  | 7.1491147061  |
| NM_015898    | ZBTB7A  | 1498 | 1607 | 8.14911470611 |
| NM_032389    | ARFGAP2 | 1677 | 1743 | 5.67637522157 |
| NM_032389    | ARFGAP2 | 2618 | 2652 | 5.59223624811 |
| NM_032389    | ARFGAP2 | 1752 | 1823 | 4.67235785732 |
| NM_032389    | ARFGAP2 | 1292 | 1346 | 6.2611642079  |
| NM_032389    | ARFGAP2 | 2016 | 2117 | 6.99830355238 |
| NM_032389    | ARFGAP2 | 1098 | 1169 | 5.67637544994 |
| NM_002140    | HNRNPK  | 519  | 599  | 3.7048390505  |
| NM_002140    | HNRNPK  | 484  | 519  | 1.70483231945 |
| NM_002140    | HNRNPK  | 2080 | 2118 | 1.70483881458 |
| NM_002140    | HNRNPK  | 1884 | 2015 | 3.28980155122 |
| NM_002140    | HNRNPK  | 1220 | 1664 | 6.81336350728 |
| NM_002140    | HNRNPK  | 2696 | 2769 | 2.7048390505  |
| NM_002140    | HNRNPK  | 1665 | 1843 | 5.16427066914 |
| NM_002140    | HNRNPK  | 2228 | 2343 | 4.16427066914 |
| NM_002140    | HNRNPK  | 603  | 1202 | 6.77092824096 |
| NM_002140    | HNRNPK  | 60   | 480  | 6.53772906466 |
| NM_152622    | MIER3   | 1978 | 2036 | 5.51717367079 |
| NM_001199849 | DAP3    | 1164 | 1203 | 5.51595073992 |
| NM_001199849 | DAP3    | 8    | 81   | 5.60008321825 |
| NM_001199849 | DAP3    | 1484 | 1581 | 8.30052966744 |
| NM_001199849 | DAP3    | 1027 | 1142 | 7.6000899493  |
| NM_001199849 | DAP3    | 870  | 1014 | 8.40744487136 |
| NM_001199849 | DAP3    | 597  | 851  | 8.50698054491 |
| NM_001199849 | DAP3    | 1591 | 1645 | 6.92201804419 |
| NM_001199849 | DAP3    | 1389 | 1481 | 6.92201804419 |
| NM_001199849 | DAP3    | 368  | 586  | 8.05952156794 |
| NM_001199849 | DAP3    | 178  | 336  | 6.18505245002 |
| NM_001199849 | DAP3    | 1223 | 1338 | 6.18505245002 |
| NM_013328    | PYCR2   | 354  | 414  | 6.3100487628  |
| NM_013328    | PYCR2   | 760  | 836  | 8.31005548631 |
| NM_013328    | PYCR2   | 415  | 488  | 7.31005525794 |
| NM_013328    | PYCR2   | 1085 | 1145 | 6.30603789368 |
| NM_013328    | PYCR2   | 1343 | 1433 | 8.31005549386 |
| NM_013328    | PYCR2   | 1514 | 1694 | 8.31005549386 |
| NM_013329    | GCFC1   | 2080 | 2192 | 5.97369622183 |
| NM_013326    | C18orf8 | 1117 | 1185 | 7.98068794257 |
| NM_013326    | C18orf8 | 373  | 421  | 8.97667057832 |
| NM_013326    | C18orf8 | 1252 | 1292 | 8.8965489691  |
| NM_013326    | C18orf8 | 483  | 599  | 9.98068817849 |
| NM_005004    | NDUFB8  | 335  | 435  | 7.34161022773 |
| NM_005004    | NDUFB8  | 610  | 659  | 6.22613301031 |
| NM_005004    | NDUFB8  | 556  | 591  | 3.64099675927 |
| NM_005004    | NDUFB8  | 445  | 549  | 7.44852543164 |
| NM_005004    | NDUFB8  | 226  | 313  | 6.44852543164 |
| NM_005004    | NDUFB8  | 103  | 182  | 5.96309860447 |

|              |          |      |      |                |
|--------------|----------|------|------|----------------|
| NM_013325    | ATG4B    | 562  | 614  | 5.33676229561  |
| NM_013325    | ATG4B    | 438  | 498  | 3.75180629002  |
| NM_013325    | ATG4B    | 977  | 1023 | 3.75163277563  |
| NM_013325    | ATG4B    | 1024 | 1101 | 5.33676902666  |
| NM_013325    | ATG4B    | 1176 | 1296 | 6.33676902666  |
| NM_013325    | ATG4B    | 91   | 279  | 7.45224624408  |
| NM_013322    | SNX10    | 1731 | 1781 | 5.10298199001  |
| NM_013322    | SNX10    | 591  | 632  | 5.68777747146  |
| NM_013322    | SNX10    | 197  | 291  | 5.10298871351  |
| NM_013322    | SNX10    | 344  | 406  | 5.10298848514  |
| NM_013322    | SNX10    | 1291 | 1390 | 5.09897112089  |
| NM_001242309 | PITRM1   | 365  | 402  | 7.35848960869  |
| NM_013321    | SNX8     | 344  | 400  | 7.60620392829  |
| NM_013321    | SNX8     | 2801 | 2866 | 6.60603017798  |
| NM_013321    | SNX8     | 615  | 658  | 7.52206471891  |
| NM_013321    | SNX8     | 1313 | 1372 | 6.60619719724  |
| NM_013321    | SNX8     | 535  | 613  | 8.19116642902  |
| NM_024085    | ATG9A    | 416  | 477  | 8.89673719442  |
| NM_024085    | ATG9A    | 1593 | 1637 | 7.31177445778  |
| NM_024085    | ATG9A    | 2874 | 2969 | 8.63370278859  |
| NM_024085    | ATG9A    | 162  | 231  | 7.89673046337  |
| NM_024085    | ATG9A    | 356  | 413  | 8.63370278859  |
| NM_024085    | ATG9A    | 2438 | 2565 | 9.48169969515  |
| NM_024085    | ATG9A    | 1125 | 1205 | 7.3117746937   |
| NM_024085    | ATG9A    | 294  | 346  | 8.31177469348  |
| NM_024085    | ATG9A    | 3346 | 3414 | 6.30775709353  |
| NM_024085    | ATG9A    | 1904 | 2073 | 9.63370278859  |
| NM_024085    | ATG9A    | 1422 | 1451 | 7.30775709353  |
| NM_024085    | ATG9A    | 2347 | 2430 | 6.31176796265  |
| NM_024085    | ATG9A    | 2176 | 2308 | 8.3117746937   |
| NM_024085    | ATG9A    | 3019 | 3307 | 10.5597022071  |
| NM_024085    | ATG9A    | 2755 | 2862 | 8.89673719442  |
| NM_024085    | ATG9A    | 1047 | 1119 | 7.31160094339  |
| NM_024085    | ATG9A    | 1451 | 1554 | 8.63370278859  |
| NM_024085    | ATG9A    | 2581 | 2754 | 9.11912961576  |
| NM_024085    | ATG9A    | 3428 | 3574 | 8.63370278859  |
| NM_024085    | ATG9A    | 479  | 834  | 10.5597022071  |
| NM_024085    | ATG9A    | 3582 | 3743 | 8.3117746937   |
| NM_024085    | ATG9A    | 837  | 969  | 10.0122144118  |
| NM_024085    | ATG9A    | 1279 | 1418 | 10.399237535   |
| NM_024085    | ATG9A    | 1646 | 1773 | 8.89673719442  |
| NM_024086    | METTTL16 | 2715 | 2758 | 7.30988907656  |
| NM_024086    | METTTL16 | 396  | 440  | 7.22976746735  |
| NM_024086    | METTTL16 | 283  | 356  | 7.31390644082  |
| NM_024086    | METTTL16 | 950  | 1024 | 7.31389994568  |
| NM_024086    | METTTL16 | 1712 | 1787 | 7.30988907656  |
| NM_024083    | ASPSCR1  | 194  | 284  | 6.42920467652  |
| NM_024083    | ASPSCR1  | 379  | 443  | 4.84424216825  |
| NM_024083    | ASPSCR1  | 1326 | 1445 | 6.42920467652  |
| NM_194260    | UBE2I    | 764  | 809  | 0.864849321177 |



|              |         |      |      |               |
|--------------|---------|------|------|---------------|
| NM_194260    | UBE2I   | 322  | 423  | 3.67220425078 |
| NM_194260    | UBE2I   | 890  | 1042 | 4.03477433017 |
| NM_194260    | UBE2I   | 477  | 671  | 3.44981182945 |
| NM_194260    | UBE2I   | 1118 | 1302 | 4.56528904687 |
| NM_015675    | GADD45B | 551  | 619  | 8.10258326867 |
| NM_015675    | GADD45B | 112  | 227  | 9.10660086884 |
| NM_024089    | KDELC1  | 198  | 238  | 5.55251581908 |
| NM_024089    | KDELC1  | 1464 | 1749 | 10.8461083941 |
| NM_024089    | KDELC1  | 1274 | 1413 | 8.95858312335 |
| NM_024089    | KDELC1  | 482  | 563  | 6.63665502847 |
| NM_024089    | KDELC1  | 1126 | 1269 | 9.72411786972 |
| NM_024089    | KDELC1  | 871  | 957  | 8.22161752919 |
| NM_024089    | KDELC1  | 964  | 1121 | 9.33709474661 |
| NM_024089    | KDELC1  | 613  | 858  | 9.44400995052 |
| NM_024089    | KDELC1  | 1771 | 2073 | 10.2805112182 |
| NM_024089    | KDELC1  | 241  | 474  | 9.72411786972 |
| NM_001012664 | SLC3A2  | 607  | 668  | 7.58366304991 |
| NM_001012664 | SLC3A2  | 1872 | 2091 | 9.77630812785 |
| NM_001012664 | SLC3A2  | 248  | 597  | 9.16862555063 |
| NM_001012664 | SLC3A2  | 144  | 245  | 8.58366304991 |
| NM_001012664 | SLC3A2  | 722  | 1863 | 12.3385505521 |
| NM_003098    | SNTA1   | 610  | 653  | 6.24573738342 |
| NM_003095    | SNRPF   | 276  | 389  | 4.80104184636 |
| NM_003095    | SNRPF   | 49   | 273  | 5.57864942503 |
| NM_003094    | SNRPE   | 99   | 233  | 5.28572427793 |
| NM_003094    | SNRPE   | 7    | 96   | 1.76216231433 |
| NM_003094    | SNRPE   | 244  | 363  | 3.76216232188 |
| NM_003096    | SNRPG   | 37   | 97   | 1.32221045323 |
| NM_003096    | SNRPG   | 114  | 166  | 2.73724818843 |
| NM_003096    | SNRPG   | 179  | 362  | 3.54460311049 |
| NM_003090    | SNRPA1  | 923  | 1008 | 5.43338647782 |
| NM_003090    | SNRPA1  | 465  | 500  | 5.01433137837 |
| NM_003090    | SNRPA1  | 54   | 115  | 3.4333862419  |
| NM_003090    | SNRPA1  | 176  | 441  | 8.38758278821 |
| NM_003090    | SNRPA1  | 773  | 905  | 4.43338647782 |
| NM_003093    | SNRPC   | 429  | 526  | 6.8820873426  |
| NM_003093    | SNRPC   | 946  | 1020 | 7.46704984332 |
| NM_003093    | SNRPC   | 579  | 684  | 6.61905293677 |
| NM_003093    | SNRPC   | 843  | 945  | 6.29712484188 |
| NM_003093    | SNRPC   | 528  | 578  | 4.29711811083 |
| NM_003092    | SNRPB2  | 546  | 642  | 3.34879604253 |
| NM_003092    | SNRPB2  | 706  | 821  | 5.34879604275 |
| NM_003092    | SNRPB2  | 487  | 546  | 4.34879604275 |
| NM_003092    | SNRPB2  | 992  | 1081 | 4.93375830755 |
| NM_003092    | SNRPB2  | 326  | 424  | 5.93375854347 |
| NM_003092    | SNRPB2  | 116  | 250  | 5.34879604275 |
| NM_002858    | ABCD3   | 811  | 932  | 6.83926973073 |
| NM_002858    | ABCD3   | 1447 | 1541 | 7.53970944887 |
| NM_002858    | ABCD3   | 2035 | 2111 | 5.42423199553 |
| NM_002858    | ABCD3   | 1090 | 1140 | 6.16119782539 |

|              |         |      |      |               |
|--------------|---------|------|------|---------------|
| NM_002858    | ABCD3   | 1015 | 1081 | 4.83926972318 |
| NM_002858    | ABCD3   | 474  | 532  | 6.16119782561 |
| NM_002858    | ABCD3   | 3051 | 3122 | 5.83926973073 |
| NM_002858    | ABCD3   | 661  | 734  | 5.42423223145 |
| NM_002858    | ABCD3   | 90   | 143  | 4.83926972318 |
| NM_002858    | ABCD3   | 3330 | 3448 | 5.42423223145 |
| NM_002858    | ABCD3   | 1630 | 1723 | 6.16119782561 |
| NM_002858    | ABCD3   | 1879 | 2014 | 7.53970944887 |
| NM_002858    | ABCD3   | 2356 | 2444 | 4.83926973073 |
| NM_002858    | ABCD3   | 368  | 474  | 6.64662465278 |
| NM_002858    | ABCD3   | 233  | 368  | 6.16119782561 |
| NM_002858    | ABCD3   | 154  | 222  | 4.83909598041 |
| NM_002858    | ABCD3   | 1725 | 1824 | 6.42423223145 |
| NM_002858    | ABCD3   | 1544 | 1618 | 5.42423223145 |
| NM_002858    | ABCD3   | 1143 | 1447 | 8.08719724417 |
| NM_002859    | PXN     | 1165 | 1250 | 8.325008081   |
| NM_002859    | PXN     | 2477 | 2536 | 8.64693617589 |
| NM_002859    | PXN     | 2010 | 2068 | 7.32500784508 |
| NM_002859    | PXN     | 3041 | 3163 | 9.90997058172 |
| NM_002859    | PXN     | 2571 | 2640 | 8.325008081   |
| NM_002859    | PXN     | 3540 | 3652 | 8.90997058172 |
| NM_002859    | PXN     | 2185 | 2226 | 6.32500784508 |
| NM_002859    | PXN     | 1906 | 1945 | 7.32099048083 |
| NM_002859    | PXN     | 431  | 477  | 6.32500134995 |
| NM_002859    | PXN     | 1251 | 1298 | 6.32500134995 |
| NM_002859    | PXN     | 143  | 262  | 8.64693617589 |
| NM_002859    | PXN     | 2733 | 2871 | 7.325008081   |
| NM_178815    | ARL5B   | 2752 | 2821 | 7.87706304233 |
| NM_178815    | ARL5B   | 522  | 616  | 7.29210054161 |
| NM_178815    | ARL5B   | 3311 | 3354 | 6.29192679129 |
| NM_178815    | ARL5B   | 2477 | 2540 | 6.28808294144 |
| NM_178815    | ARL5B   | 984  | 1081 | 7.87706304233 |
| NM_178815    | ARL5B   | 25   | 93   | 6.20796133223 |
| NM_178815    | ARL5B   | 1361 | 1480 | 7.87706304233 |
| NM_178815    | ARL5B   | 1825 | 1897 | 7.87706303478 |
| NM_178815    | ARL5B   | 240  | 343  | 9.09945546367 |
| NM_178815    | ARL5B   | 2323 | 2465 | 7.87706304233 |
| NM_001005354 | PRR13   | 305  | 403  | 4.69534564974 |
| NM_001005354 | PRR13   | 884  | 1034 | 6.56981476766 |
| NM_001005354 | PRR13   | 693  | 766  | 5.11038314902 |
| NM_001005354 | PRR13   | 773  | 875  | 4.11038314147 |
| NM_001005354 | PRR13   | 417  | 559  | 5.43231124391 |
| NM_002857    | PEX19   | 870  | 955  | 7.40181727854 |
| NM_024552    | CERS4   | 1007 | 1058 | 6.27171997408 |
| NM_024552    | CERS4   | 1188 | 1294 | 8.67778727835 |
| NM_024552    | CERS4   | 1301 | 1363 | 5.35585894755 |
| NM_024552    | CERS4   | 1063 | 1177 | 8.52578418491 |
| NM_024552    | CERS4   | 710  | 789  | 6.35568543315 |
| NM_024551    | ADIPOR2 | 3328 | 3394 | 7.46459428268 |
| NM_024551    | ADIPOR2 | 2339 | 2407 | 8.68698670402 |

|              |          |      |      |               |               |
|--------------|----------|------|------|---------------|---------------|
| NM_024551    | ADIPOR2  | 208  | 270  | 7.46459428268 |               |
| NM_024551    | ADIPOR2  | 3718 | 3759 | 5.79549257258 |               |
| NM_024551    | ADIPOR2  | 1452 | 1545 | 9.0495567834  |               |
| NM_024551    | ADIPOR2  | 1901 | 2050 | 9.3390634006  |               |
| NM_024551    | ADIPOR2  | 312  | 408  | 8.87963178196 |               |
| NM_024551    | ADIPOR2  | 3785 | 3824 | 5.87561418179 |               |
| NM_024551    | ADIPOR2  | 3842 | 3956 | 8.20155987685 |               |
| NM_024551    | ADIPOR2  | 3586 | 3711 | 8.87963178196 |               |
| NM_024551    | ADIPOR2  | 2150 | 2321 | 9.5800715001  |               |
| NM_024551    | ADIPOR2  | 3096 | 3267 | 7.46459428268 |               |
| NM_024551    | ADIPOR2  | 1563 | 1715 | 8.87963178196 |               |
| NM_024551    | ADIPOR2  | 2408 | 2600 | 9.87963178196 |               |
| NM_024551    | ADIPOR2  | 26   | 205  | 8.20155987685 |               |
| NM_024551    | ADIPOR2  | 3397 | 3493 | 5.87963177441 |               |
| NM_024551    | ADIPOR2  | 1071 | 1155 | 9.20155987685 |               |
| NM_024551    | ADIPOR2  | 1752 | 1854 | 7.46459428268 |               |
| NM_024551    | ADIPOR2  | 2606 | 2739 | 8.46459428268 |               |
| NM_024551    | ADIPOR2  | 419  | 1070 | 12.3714848783 |               |
| NM_024551    | ADIPOR2  | 2797 | 2996 | 9.68698670402 |               |
| NM_024551    | ADIPOR2  | 1156 | 1397 | 10.3390634006 |               |
| NM_024555    | FBXL6    | 709  | 781  | 11.0449200026 |               |
| NM_177424    | STX12    | 923  | 983  | 4.19376955915 |               |
| NM_177424    | STX12    | 1351 | 1392 | 4.10980410009 |               |
| NM_177424    | STX12    | 2251 | 2309 | 5.1899257093  |               |
| NM_001085372 | C11orf83 |      | 505  | 550           | 6.25757477463 |
| NM_001085372 | C11orf83 |      | 806  | 854           | 6.25774852495 |
| NM_017914    | C19orf24 |      | 705  | 778           | 9.88922984221 |
| NM_017914    | C19orf24 |      | 552  | 646           | 8.56730174733 |
| NM_017914    | C19orf24 |      | 242  | 326           | 10.8892298422 |
| NM_017914    | C19orf24 |      | 344  | 400           | 7.56730151141 |
| NM_005499    | UBA2     | 1109 | 1159 | 3.61399623449 |               |
| NM_005499    | UBA2     | 1167 | 1198 | 3.61382248418 |               |
| NM_005499    | UBA2     | 1401 | 1465 | 4.19895873522 |               |
| NM_005499    | UBA2     | 149  | 249  | 5.78392123594 |               |
| NM_005499    | UBA2     | 2125 | 2187 | 2.61399623428 |               |
| NM_005499    | UBA2     | 1986 | 2028 | 3.61398950344 |               |
| NM_005499    | UBA2     | 1039 | 1104 | 3.61399622695 |               |
| NM_005499    | UBA2     | 1231 | 1338 | 4.19895873522 |               |
| NM_005499    | UBA2     | 1572 | 1720 | 5.42135115656 |               |
| NM_005499    | UBA2     | 251  | 421  | 5.93592432939 |               |
| NM_005499    | UBA2     | 846  | 997  | 5.78392123594 |               |
| NM_005499    | UBA2     | 680  | 741  | 4.19895873522 |               |
| NM_005499    | UBA2     | 476  | 657  | 5.93592432939 |               |
| NM_147189    | FAM110B  | 2637 | 2655 | 11.1354039916 |               |
| NM_014567    | BCAR1    | 2204 | 2315 | 7.61443904432 |               |
| NM_014567    | BCAR1    | 2838 | 2951 | 9.19940154504 |               |
| NM_014567    | BCAR1    | 2402 | 2449 | 7.02947630768 |               |
| NM_014567    | BCAR1    | 2488 | 2539 | 5.94533733421 |               |
| NM_014567    | BCAR1    | 1943 | 1997 | 6.02946981254 |               |
| NM_014567    | BCAR1    | 1155 | 1294 | 6.0294765436  |               |

|           |           |       |       |               |               |
|-----------|-----------|-------|-------|---------------|---------------|
| NM_014567 | BCAR1     | 3115  | 3231  | 7.61443904432 |               |
| NM_014567 | BCAR1     | 2072  | 2143  | 7.02947654338 |               |
| NM_014567 | BCAR1     | 1491  | 1641  | 8.0294765436  |               |
| NM_014567 | BCAR1     | 139   | 347   | 9.72991626174 |               |
| NM_014567 | BCAR1     | 1297  | 1408  | 7.61443904432 |               |
| NM_014567 | BCAR1     | 1680  | 1927  | 8.61443904432 |               |
| NM_018072 | HEATR1    | 1969  | 2024  | 7.96202541825 |               |
| NM_018072 | HEATR1    | 2656  | 2710  | 7.37706290998 |               |
| NM_018072 | HEATR1    | 3542  | 3605  | 7.9620254107  |               |
| NM_018072 | HEATR1    | 6312  | 6372  | 7.37705618648 |               |
| NM_018072 | HEATR1    | 3315  | 3365  | 6.29292370815 |               |
| NM_018072 | HEATR1    | 5827  | 5866  | 6.37705618648 |               |
| NM_018072 | HEATR1    | 3723  | 3798  | 7.37705618648 |               |
| NM_018072 | HEATR1    | 1462  | 1554  | 7.37705618648 |               |
| NM_018072 | HEATR1    | 2252  | 2303  | 8.37706291731 |               |
| NM_018072 | HEATR1    | 1371  | 1435  | 6.37304531736 |               |
| NM_018072 | HEATR1    | 4687  | 4727  | 7.37688916721 |               |
| NM_018072 | HEATR1    | 3376  | 3454  | 6.37706290998 |               |
| NM_018072 | HEATR1    | 2422  | 2507  | 7.37706291731 |               |
| NM_018072 | HEATR1    | 1128  | 1190  | 7.37304531736 |               |
| NM_018072 | HEATR1    | 1610  | 1655  | 7.29292370815 |               |
| NM_018072 | HEATR1    | 8236  | 8310  | 6.37304531736 |               |
| NM_018072 | HEATR1    | 1737  | 1783  | 7.37706268161 |               |
| NM_018072 | HEATR1    | 3071  | 3151  | 7.96202541825 |               |
| NM_018072 | HEATR1    | 2560  | 2647  | 8.37706291753 |               |
| NM_005493 | RANBP9    | 812   | 908   | 6.87473027252 |               |
| NM_147185 | AKAP9     | 5717  | 5776  | 4.90211497552 |               |
| NM_147185 | AKAP9     | 3031  | 3114  | 3.98624745385 |               |
| NM_147185 | AKAP9     | 8702  | 8752  | 3.98223658473 |               |
| NM_147185 | AKAP9     | 11537 | 11576 | 4.90211497552 |               |
| NM_147185 | AKAP9     | 11000 | 11055 | 4.98223658473 |               |
| NM_147185 | AKAP9     | 11585 | 11699 | 6.57121668563 |               |
| NM_147185 | AKAP9     | 12193 | 12262 | 3.98624745385 |               |
| NM_147187 | TNFRSF10B |       | 2495  | 2551          | 4.22751423316 |
| NM_147187 | TNFRSF10B |       | 1109  | 1156          | 5.14337503132 |
| NM_147187 | TNFRSF10B |       | 3109  | 3169          | 4.22751424071 |
| NM_147187 | TNFRSF10B |       | 851   | 939           | 4.22751424071 |
| NM_147187 | TNFRSF10B |       | 1878  | 1922          | 4.22349664053 |
| NM_147187 | TNFRSF10B |       | 2819  | 2925          | 5.54944233559 |
| NM_147187 | TNFRSF10B |       | 776   | 840           | 3.22751400479 |
| NM_147187 | TNFRSF10B |       | 1616  | 1769          | 6.39743924215 |
| NM_147187 | TNFRSF10B |       | 941   | 1064          | 5.81247674143 |
| NM_147187 | TNFRSF10B |       | 3642  | 3727          | 3.22751424071 |
| NM_147187 | TNFRSF10B |       | 396   | 635           | 5.81247674143 |
| NM_147187 | TNFRSF10B |       | 1192  | 1564          | 7.54944233559 |
| NM_005497 | GJC1      | 509   | 580   | 10.81484741   |               |
| NM_005497 | GJC1      | 1105  | 1210  | 11.2298851452 |               |
| NM_005497 | GJC1      | 1540  | 1624  | 10.2298851376 |               |
| NM_005497 | GJC1      | 7511  | 7611  | 10.2298851452 |               |
| NM_005497 | GJC1      | 1012  | 1101  | 12.2298851452 |               |

|           |         |      |      |               |
|-----------|---------|------|------|---------------|
| NM_005497 | GJC1    | 7261 | 7341 | 10.8148476457 |
| NM_005497 | GJC1    | 2891 | 2949 | 9.22987841412 |
| NM_005497 | GJC1    | 1448 | 1521 | 10.2298784141 |
| NM_005497 | GJC1    | 3909 | 3968 | 10.8148409148 |
| NM_005497 | GJC1    | 421  | 507  | 12.0372400672 |
| NM_005497 | GJC1    | 1674 | 1774 | 11.5518132401 |
| NM_005497 | GJC1    | 1272 | 1328 | 10.1457459358 |
| NM_005497 | GJC1    | 1794 | 1863 | 10.8148476383 |
| NM_005497 | GJC1    | 268  | 415  | 13.2298851452 |
| NM_005497 | GJC1    | 2086 | 2145 | 9.225867545   |
| NM_005497 | GJC1    | 754  | 1005 | 13.3998101466 |
| NM_005497 | GJC1    | 5356 | 5431 | 10.2298849093 |
| NM_005496 | SMC4    | 953  | 1025 | 5.329852367   |
| NM_005496 | SMC4    | 699  | 750  | 4.32583476683 |
| NM_005496 | SMC4    | 1938 | 2007 | 5.9148148675  |
| NM_005496 | SMC4    | 3923 | 3958 | 4.32583476683 |
| NM_005496 | SMC4    | 1043 | 1113 | 5.91480813667 |
| NM_005496 | SMC4    | 4083 | 4158 | 6.65178046189 |
| NM_005496 | SMC4    | 4025 | 4063 | 5.83067565834 |
| NM_005496 | SMC4    | 2302 | 2343 | 5.24571315761 |
| NM_005496 | SMC4    | 3716 | 3835 | 6.329852367   |
| NM_005496 | SMC4    | 3556 | 3685 | 6.65178046189 |
| NM_005496 | SMC4    | 2103 | 2191 | 6.32985213108 |
| NM_005496 | SMC4    | 4994 | 5119 | 5.91481486772 |
| NM_005496 | SMC4    | 3174 | 3230 | 4.24571315761 |
| NM_005496 | SMC4    | 4612 | 4715 | 5.329852367   |
| NM_005496 | SMC4    | 2388 | 2535 | 4.329852367   |
| NM_005869 | CWC27   | 83   | 138  | 3.72631616312 |
| NM_080866 | SLC22A9 | 6    | 111  | 9.32966900298 |
| NM_080866 | SLC22A9 | 1559 | 1612 | 6.52230734986 |
| NM_080866 | SLC22A9 | 1874 | 2031 | 8.10727658164 |
| NM_080866 | SLC22A9 | 1312 | 1371 | 8.5221403306  |
| NM_080866 | SLC22A9 | 964  | 1134 | 10.6097769222 |
| NM_080866 | SLC22A9 | 170  | 287  | 9.69223908236 |
| NM_080866 | SLC22A9 | 1399 | 1553 | 9.52231408092 |
| NM_080866 | SLC22A9 | 294  | 513  | 11.045876037  |
| NM_080866 | SLC22A9 | 583  | 746  | 10.1072765816 |
| NM_080866 | SLC22A9 | 1654 | 1867 | 10.1072765816 |
| NM_080866 | SLC22A9 | 1136 | 1255 | 8.10727658164 |
| NM_080866 | SLC22A9 | 820  | 909  | 9.10727658164 |
| NM_003631 | PARG    | 1961 | 2016 | 7.16058369556 |
| NM_003631 | PARG    | 2465 | 2537 | 7.16058369556 |
| NM_003631 | PARG    | 1608 | 1642 | 6.57161032572 |
| NM_003631 | PARG    | 1648 | 1695 | 6.57161032572 |
| NM_003631 | PARG    | 3977 | 4021 | 7.1604166763  |
| NM_003630 | PEX3    | 1102 | 1189 | 6.76356690503 |
| NM_003630 | PEX3    | 260  | 298  | 7.26439043229 |
| NM_003633 | ENC1    | 5195 | 5265 | 3.15629840818 |
| NM_003633 | ENC1    | 4950 | 5028 | 5.15630513923 |
| NM_003633 | ENC1    | 821  | 879  | 3.07216592985 |

|              |           |      |      |               |               |
|--------------|-----------|------|------|---------------|---------------|
| NM_003633    | ENC1      | 3344 | 3502 | 4.15630513923 |               |
| NM_003633    | ENC1      | 2759 | 2815 | 3.15630513923 |               |
| NM_003633    | ENC1      | 4564 | 4638 | 5.96366006129 |               |
| NM_003633    | ENC1      | 1420 | 1457 | 3.07216592985 |               |
| NM_003633    | ENC1      | 1026 | 1071 | 4.74126740403 |               |
| NM_003633    | ENC1      | 1909 | 2019 | 5.15630513923 |               |
| NM_003633    | ENC1      | 3255 | 3323 | 3.07216592985 |               |
| NM_003633    | ENC1      | 4643 | 4738 | 5.15630513923 |               |
| NM_003633    | ENC1      | 5048 | 5148 | 4.15630513923 |               |
| NM_003633    | ENC1      | 4837 | 4887 | 3.15630490331 |               |
| NM_003633    | ENC1      | 5354 | 5440 | 4.7412609089  |               |
| NM_003633    | ENC1      | 1659 | 1818 | 5.74126763995 |               |
| NM_003633    | ENC1      | 3505 | 3603 | 4.74126763995 |               |
| NM_003632    | CNTNAP1   | 2452 | 2480 | 7.26196136008 |               |
| NM_003632    | CNTNAP1   | 2221 | 2247 | 7.26196136008 |               |
| NM_003632    | CNTNAP1   | 2351 | 2415 | 8.34208296929 |               |
| NM_003632    | CNTNAP1   | 2822 | 2859 | 7.34592681915 |               |
| NM_003632    | CNTNAP1   | 3124 | 3183 | 8.93106306264 |               |
| NM_003632    | CNTNAP1   | 713  | 760  | 7.34208296929 |               |
| NM_003632    | CNTNAP1   | 1795 | 1849 | 8.34208296929 |               |
| NM_003632    | CNTNAP1   | 1045 | 1127 | 8.92704547002 |               |
| NM_003632    | CNTNAP1   | 1870 | 1944 | 7.34609383841 |               |
| NM_003632    | CNTNAP1   | 3505 | 3566 | 7.34610056925 |               |
| NM_003632    | CNTNAP1   | 4080 | 4135 | 7.34592681915 |               |
| NM_003632    | CNTNAP1   | 2038 | 2127 | 9.34610056947 |               |
| NM_001002755 | NFU1      | 613  | 669  | 3.05842230518 |               |
| NM_001002755 | NFU1      | 966  | 1014 | 2.47345981179 |               |
| NM_001002755 | NFU1      | 893  | 942  | 1.47345308096 |               |
| NM_018440    | PAG1      | 2809 | 2850 | 10.1886125854 |               |
| NM_018440    | PAG1      | 8190 | 8267 | 10.2727515589 |               |
| NM_001242480 | LOC389831 |      | 127  | 162           | 8.53753672608 |
| NM_001242480 | LOC389831 |      | 847  | 888           | 6.87245261615 |
| NM_001242480 | LOC389831 |      | 681  | 757           | 8.54155409034 |
| NM_001242480 | LOC389831 |      | 1968 | 2008          | 6.87245261615 |
| NM_001242480 | LOC389831 |      | 761  | 842           | 7.95659182531 |
| NM_018110    | DOK4      | 482  | 534  | 7.38379109757 |               |
| NM_018110    | DOK4      | 1075 | 1103 | 5.71469611852 |               |
| NM_018110    | DOK4      | 359  | 440  | 6.79481772773 |               |
| NM_018110    | DOK4      | 765  | 827  | 6.79866157758 |               |
| NM_018110    | DOK4      | 2385 | 2463 | 5.79883509198 |               |
| NM_018447    | TMEM111   | 412  | 521  | 8.93817785132 |               |
| NM_018447    | TMEM111   | 768  | 795  | 5.47472863251 |               |
| NM_018447    | TMEM111   | 536  | 586  | 8.0637087334  |               |
| NM_018447    | TMEM111   | 597  | 760  | 10.0023081887 |               |
| NM_018447    | TMEM111   | 829  | 1043 | 9.64867123412 |               |
| NM_018447    | TMEM111   | 101  | 338  | 9.0637087334  |               |
| NM_001145306 | CDK6      | 133  | 234  | 8.92573175201 |               |
| NM_001145306 | CDK6      | 9828 | 9933 | 6.11837682996 |               |
| NM_001145306 | CDK6      | 5397 | 5461 | 7.11837659404 |               |
| NM_001145306 | CDK6      | 9121 | 9168 | 7.70333932313 |               |

|              |      |       |       |               |
|--------------|------|-------|-------|---------------|
| NM_001145306 | CDK6 | 2743  | 2830  | 7.70333933068 |
| NM_001145306 | CDK6 | 7920  | 7974  | 6.11837682995 |
| NM_001145306 | CDK6 | 11247 | 11312 | 7.11837682241 |
| NM_001145306 | CDK6 | 6845  | 6949  | 7.11837682996 |
| NM_001145306 | CDK6 | 10364 | 10441 | 7.70333933068 |
| NM_001145306 | CDK6 | 7665  | 7726  | 7.70333933068 |
| NM_001145306 | CDK6 | 11588 | 11649 | 8.11837659404 |
| NM_001145306 | CDK6 | 8729  | 8789  | 7.11837659404 |
| NM_001145306 | CDK6 | 10589 | 10674 | 8.44030492484 |
| NM_001145306 | CDK6 | 10697 | 10765 | 8.11837682996 |
| NM_001145306 | CDK6 | 10112 | 10181 | 7.70333933068 |
| NM_001145306 | CDK6 | 5546  | 5592  | 7.11820307964 |
| NM_001145306 | CDK6 | 3149  | 3193  | 7.11837659404 |
| NM_001145306 | CDK6 | 3751  | 3806  | 7.03423762057 |
| NM_001145306 | CDK6 | 2325  | 2384  | 7.11837682996 |
| NM_001145306 | CDK6 | 3858  | 3902  | 6.11837659404 |
| NM_001145306 | CDK6 | 11363 | 11452 | 8.70333933068 |
| NM_001145306 | CDK6 | 9169  | 9244  | 7.70333933068 |
| NM_001145306 | CDK6 | 8795  | 8873  | 8.11837682996 |
| NM_001145306 | CDK6 | 10002 | 10079 | 9.2883018314  |
| NM_001145306 | CDK6 | 3255  | 3339  | 7.70333932313 |
| NM_001145306 | CDK6 | 3902  | 3954  | 7.11820307964 |
| NM_001145306 | CDK6 | 8957  | 9039  | 8.11837682996 |
| NM_001145306 | CDK6 | 2539  | 2714  | 8.92573175201 |
| NM_001145306 | CDK6 | 606   | 665   | 7.11837682241 |
| NM_001145306 | CDK6 | 8147  | 8246  | 6.11837682996 |
| NM_001145306 | CDK6 | 1502  | 1547  | 7.6993217305  |
| NM_001145306 | CDK6 | 4426  | 4503  | 8.44030492484 |
| NM_001145306 | CDK6 | 8286  | 8347  | 7.11820307964 |
| NM_001145306 | CDK6 | 9043  | 9083  | 6.1183700989  |
| NM_001145306 | CDK6 | 10779 | 10849 | 6.1183700989  |
| NM_001145306 | CDK6 | 3086  | 3147  | 8.11837659404 |
| NM_001145306 | CDK6 | 7049  | 7108  | 6.1183700989  |
| NM_001145306 | CDK6 | 3982  | 4142  | 9.70333933068 |
| NM_001145306 | CDK6 | 4148  | 4202  | 7.03423762057 |
| NM_001145306 | CDK6 | 1846  | 1965  | 8.11837682996 |
| NM_001145306 | CDK6 | 10448 | 10532 | 7.70333933068 |
| NM_001145306 | CDK6 | 5593  | 5665  | 6.11837682973 |
| NM_001145306 | CDK6 | 1087  | 1262  | 9.2883018314  |
| NM_001145306 | CDK6 | 10293 | 10340 | 7.11837659404 |
| NM_001145306 | CDK6 | 9482  | 9548  | 7.11435922978 |
| NM_001145306 | CDK6 | 8378  | 8482  | 8.44030492484 |
| NM_001145306 | CDK6 | 11655 | 11690 | 6.03423762057 |
| NM_001145306 | CDK6 | 883   | 1071  | 10.5778084486 |
| NM_001145306 | CDK6 | 2924  | 3080  | 9.2883018314  |
| NM_001145306 | CDK6 | 4970  | 5080  | 6.11837682996 |
| NM_001145306 | CDK6 | 4218  | 4285  | 7.70333933068 |
| NM_001145306 | CDK6 | 2410  | 2528  | 9.57780844859 |
| NM_001145306 | CDK6 | 3346  | 3413  | 7.11435922978 |
| NM_001145306 | CDK6 | 8498  | 8603  | 7.70333933068 |

|              |       |      |      |               |
|--------------|-------|------|------|---------------|
| NM_001145306 | CDK6  | 6612 | 6736 | 9.57780844859 |
| NM_001145306 | CDK6  | 8611 | 8711 | 6.11837682996 |
| NM_001145306 | CDK6  | 3459 | 3519 | 8.11837682996 |
| NM_001145306 | CDK6  | 2839 | 2919 | 8.44030492484 |
| NM_001145306 | CDK6  | 6406 | 6520 | 7.11837682996 |
| NM_001145306 | CDK6  | 5470 | 5540 | 7.11837682996 |
| NM_001145306 | CDK6  | 3613 | 3751 | 7.70333933068 |
| NM_001145306 | CDK6  | 1573 | 1792 | 9.8188165481  |
| NM_001145306 | CDK6  | 1295 | 1425 | 8.11837682996 |
| NM_001145306 | CDK6  | 7989 | 8067 | 6.11435922978 |
| NM_001145306 | CDK6  | 4351 | 4421 | 6.03423762057 |
| NM_001145306 | CDK6  | 9715 | 9821 | 7.11837682996 |
| NM_001145306 | CDK6  | 702  | 866  | 9.8188165481  |
| NM_001145306 | CDK6  | 7215 | 7296 | 7.6993217305  |
| NM_018448    | CAND1 | 3776 | 3888 | 8.23044969029 |
| NM_018448    | CAND1 | 3726 | 3774 | 7.64548718957 |
| NM_018448    | CAND1 | 2504 | 2559 | 5.06052468863 |
| NM_018448    | CAND1 | 2408 | 2468 | 7.86787961091 |
| NM_018448    | CAND1 | 1627 | 1697 | 7.38245278374 |
| NM_018448    | CAND1 | 3167 | 3216 | 6.64548718957 |
| NM_018448    | CAND1 | 2821 | 2863 | 6.64548718202 |
| NM_018448    | CAND1 | 772  | 862  | 6.06052445293 |
| NM_018448    | CAND1 | 2616 | 2690 | 7.86787961091 |
| NM_018448    | CAND1 | 4086 | 4148 | 6.06052468884 |
| NM_018448    | CAND1 | 1000 | 1104 | 7.64548718957 |
| NM_018448    | CAND1 | 679  | 732  | 6.64531343925 |
| NM_018448    | CAND1 | 1245 | 1295 | 6.64548718956 |
| NM_018448    | CAND1 | 2353 | 2406 | 7.06052468885 |
| NM_018448    | CAND1 | 1204 | 1244 | 5.06052468863 |
| NM_018448    | CAND1 | 3056 | 3136 | 7.64548718957 |
| NM_018448    | CAND1 | 3392 | 3540 | 8.51995630749 |
| NM_018448    | CAND1 | 4155 | 4215 | 6.06052468885 |
| NM_018448    | CAND1 | 4264 | 4347 | 6.64548718202 |
| NM_018448    | CAND1 | 2871 | 3043 | 9.45284211163 |
| NM_018448    | CAND1 | 3246 | 3360 | 8.38245278374 |
| NM_018448    | CAND1 | 477  | 624  | 8.38245278374 |
| NM_018448    | CAND1 | 2151 | 2182 | 6.05650708868 |
| NM_018448    | CAND1 | 1375 | 1611 | 9.38245278374 |
| NM_018448    | CAND1 | 2272 | 2346 | 6.64548718957 |
| NM_018448    | CAND1 | 908  | 994  | 7.64548718957 |
| NM_018448    | CAND1 | 3540 | 3699 | 8.86787961091 |
| NM_018448    | CAND1 | 1896 | 2151 | 9.51995630749 |
| NM_018448    | CAND1 | 2191 | 2262 | 6.64548718957 |
| NM_018448    | CAND1 | 2690 | 2805 | 8.51995630749 |
| NM_018448    | CAND1 | 1758 | 1891 | 7.38245278374 |
| NM_018449    | UBAP2 | 4067 | 4118 | 6.29084952135 |
| NM_018449    | UBAP2 | 2581 | 2651 | 6.87581851721 |
| NM_018449    | UBAP2 | 1701 | 1778 | 7.2908562524  |
| NM_018449    | UBAP2 | 291  | 384  | 5.29085624485 |
| NM_018449    | UBAP2 | 1843 | 1979 | 7.87581875313 |



|              |          |      |      |                    |
|--------------|----------|------|------|--------------------|
| NM_018449    | UBAP2    | 2042 | 2218 | 8.09821117446      |
| NM_018449    | UBAP2    | 584  | 658  | 5.28683865223      |
| NM_018449    | UBAP2    | 742  | 802  | 5.29085601649      |
| NM_018449    | UBAP2    | 3808 | 4008 | 8.2908562524       |
| NM_018119    | POLR3E   | 228  | 291  | 4.04861950118      |
| NM_018119    | POLR3E   | 2248 | 2304 | 5.04861950118      |
| NM_018119    | POLR3E   | 1294 | 1396 | 4.04861950118      |
| NM_018119    | POLR3E   | 1981 | 2043 | 4.04460190101      |
| NM_018119    | POLR3E   | 154  | 207  | 6.04460190101      |
| NM_018119    | POLR3E   | 2419 | 2465 | 5.04460190101      |
| NM_018119    | POLR3E   | 1436 | 1578 | 5.04861950118      |
| NM_018119    | POLR3E   | 996  | 1139 | 4.04861949364      |
| NM_130468    | CHST14   | 1638 | 1678 | 9.9695169408       |
| NM_130468    | CHST14   | 2108 | 2157 | 8.38071059023      |
| NM_130468    | CHST14   | 896  | 975  | 9.38472145935      |
| NM_001042410 | ANKZF1   | 1243 | 1296 | 4.12600101603      |
| NM_001042410 | ANKZF1   | 951  | 1021 | 4.04587940682      |
| NM_014306    | C22orf28 |      | 1047 | 1107 6.876444374   |
| NM_014306    | C22orf28 |      | 1590 | 1685 5.87644460992 |
| NM_014306    | C22orf28 |      | 1971 | 2036 4.87242700974 |
| NM_014306    | C22orf28 |      | 1686 | 1747 7.68379953197 |
| NM_014306    | C22orf28 |      | 879  | 927 4.876444374    |
| NM_014306    | C22orf28 |      | 971  | 1041 7.68379953197 |
| NM_014306    | C22orf28 |      | 810  | 871 5.8762708596   |
| NM_014306    | C22orf28 |      | 661  | 785 4.87644460992  |
| NM_014306    | C22orf28 |      | 1425 | 1511 7.68379953197 |
| NM_014306    | C22orf28 |      | 1107 | 1263 8.33587622855 |
| NM_014306    | C22orf28 |      | 469  | 561 7.1983727048   |
| NM_014306    | C22orf28 |      | 351  | 453 7.1983727048   |
| NM_014306    | C22orf28 |      | 1278 | 1415 7.46140711064 |
| NM_014306    | C22orf28 |      | 147  | 322 7.46140711064  |
| NM_001190214 | PPIP5K1  | 1214 | 1268 | 7.70498358401      |
| NM_001190214 | PPIP5K1  | 2371 | 2443 | 7.6248619748       |
| NM_014300    | SEC11A   | 598  | 677  | 3.48474561956      |
| NM_014300    | SEC11A   | 1077 | 1186 | 4.70713804089      |
| NM_014300    | SEC11A   | 159  | 209  | 3.89960936852      |
| NM_014300    | SEC11A   | 351  | 591  | 7.14771063228      |
| NM_014300    | SEC11A   | 688  | 1065 | 7.92215093186      |
| NM_014300    | SEC11A   | 1321 | 1401 | 2.89978311884      |
| NM_014303    | PES1     | 1383 | 1449 | 5.84521259669      |
| NM_014303    | PES1     | 93   | 166  | 6.34603589557      |
| NM_014303    | PES1     | 189  | 245  | 6.43000135464      |
| NM_014303    | PES1     | 1209 | 1270 | 6.43017510496      |
| NM_014303    | PES1     | 533  | 623  | 6.84521260424      |
| NM_014303    | PES1     | 1282 | 1352 | 5.84119500406      |
| NM_014302    | SEC61G   | 44   | 264  | 5.60430785371      |
| NM_014302    | SEC61G   | 277  | 413  | 4.97203963821      |
| NM_001204368 | MGST2    | 206  | 630  | 6.8848329683       |
| NM_005671    | UBXN8    | 769  | 840  | 8.35654710927      |
| NM_005671    | UBXN8    | 665  | 712  | 7.94150937407      |

|              |         |      |      |               |
|--------------|---------|------|------|---------------|
| NM_005671    | UBXN8   | 555  | 640  | 9.16390203133 |
| NM_005671    | UBXN8   | 480  | 542  | 8.35654710926 |
| NM_005671    | UBXN8   | 356  | 439  | 6.3525295091  |
| NM_005671    | UBXN8   | 25   | 220  | 10.0569868274 |
| NM_005671    | UBXN8   | 940  | 1046 | 8.94150960999 |
| NM_001830    | CLCN4   | 2970 | 3032 | 12.1412079869 |
| NM_001830    | CLCN4   | 690  | 738  | 12.1412079871 |
| NM_001830    | CLCN4   | 856  | 920  | 11.5562387553 |
| NM_001830    | CLCN4   | 436  | 493  | 10.5562452505 |
| NM_001830    | CLCN4   | 1194 | 1253 | 11.5522278862 |
| NM_001830    | CLCN4   | 1100 | 1143 | 11.5562387553 |
| NM_001830    | CLCN4   | 3139 | 3177 | 11.5522278862 |
| NM_001830    | CLCN4   | 5765 | 5822 | 10.5522278862 |
| NM_001830    | CLCN4   | 1385 | 1432 | 10.5522278862 |
| NM_001830    | CLCN4   | 922  | 978  | 11.5562454864 |
| NM_001830    | CLCN4   | 1910 | 1953 | 10.5562387553 |
| NM_001830    | CLCN4   | 493  | 571  | 11.5522278862 |
| NM_001830    | CLCN4   | 1611 | 1711 | 12.1412079871 |
| NM_001830    | CLCN4   | 1789 | 1862 | 10.5522278862 |
| NM_001830    | CLCN4   | 4687 | 4822 | 11.5562454864 |
| NM_001830    | CLCN4   | 739  | 850  | 10.5562454864 |
| NM_152531    | C3orf21 | 766  | 804  | 8.77881582139 |
| NM_152531    | C3orf21 | 615  | 667  | 10.3677956864 |
| NM_001034194 | EXOSC9  | 719  | 780  | 3.79544551719 |
| NM_001034194 | EXOSC9  | 1202 | 1315 | 5.79946311737 |
| NM_001034194 | EXOSC9  | 197  | 300  | 5.38442561809 |
| NM_016048    | ISOC1   | 1304 | 1363 | 5.64655160742 |
| NM_016048    | ISOC1   | 734  | 855  | 6.65056920004 |
| NM_016048    | ISOC1   | 917  | 970  | 6.65056247654 |
| NM_016048    | ISOC1   | 91   | 163  | 6.65056920737 |
| NM_016049    | FAM158A | 452  | 489  | 5.87185353814 |
| NM_016040    | TMED5   | 2163 | 2253 | 3.41365849478 |
| NM_016040    | TMED5   | 3798 | 3864 | 2.67669290061 |
| NM_016040    | TMED5   | 2270 | 2339 | 3.67669290061 |
| NM_016040    | TMED5   | 3582 | 3695 | 4.55116201853 |
| NM_016040    | TMED5   | 1947 | 1984 | 3.4096408946  |
| NM_016040    | TMED5   | 2045 | 2141 | 2.09173039989 |
| NM_016040    | TMED5   | 1048 | 1157 | 4.09173039989 |
| NM_016040    | TMED5   | 5181 | 5248 | 1.08771279972 |
| NM_016040    | TMED5   | 1867 | 1931 | 1.09173039967 |
| NM_016040    | TMED5   | 1380 | 1415 | 2.0075911905  |
| NM_016040    | TMED5   | 1544 | 1625 | 3.09173039989 |
| NM_016040    | TMED5   | 2918 | 2967 | 2.67267530044 |
| NM_016040    | TMED5   | 3066 | 3241 | 5.33965791333 |
| NM_016040    | TMED5   | 2017 | 2042 | 1.0075911905  |
| NM_016040    | TMED5   | 1223 | 1374 | 4.67669290061 |
| NM_016040    | TMED5   | 1764 | 1866 | 2.67669290061 |
| NM_016040    | TMED5   | 3973 | 4045 | 2.09173039988 |
| NM_016040    | TMED5   | 527  | 1048 | 6.81965085445 |
| NM_016040    | TMED5   | 2439 | 2510 | 3.67669290061 |

|              |         |      |      |               |
|--------------|---------|------|------|---------------|
| NM_016040    | TMED5   | 314  | 519  | 4.79217011803 |
| NM_016041    | DERL2   | 796  | 856  | 5.99781930108 |
| NM_016041    | DERL2   | 24   | 74   | 5.99798632034 |
| NM_016041    | DERL2   | 473  | 578  | 7.9979930514  |
| NM_016041    | DERL2   | 195  | 467  | 9.45742467003 |
| NM_016041    | DERL2   | 935  | 1062 | 7.31992113873 |
| NM_016041    | DERL2   | 589  | 691  | 6.5829553162  |
| NM_016042    | EXOSC3  | 625  | 707  | 4.59021509251 |
| NM_016044    | FAHD2A  | 741  | 812  | 7.98324517736 |
| NM_016045    | SLM02   | 438  | 487  | 4.26377297238 |
| NM_016045    | SLM02   | 1350 | 1398 | 5.93287444657 |
| NM_016045    | SLM02   | 72   | 184  | 4.34791218177 |
| NM_016045    | SLM02   | 650  | 753  | 5.93287468249 |
| NM_016045    | SLM02   | 198  | 269  | 4.34791194585 |
| NM_016047    | SF3B14  | 241  | 339  | 2.69323855683 |
| NM_016047    | SF3B14  | 363  | 424  | 4.27820105755 |
| NM_016047    | SF3B14  | 480  | 559  | 2.69323855683 |
| NM_018231    | SLC38A7 | 411  | 459  | 10.2134482857 |
| NM_018231    | SLC38A7 | 1605 | 1654 | 10.2134482857 |
| NM_018231    | SLC38A7 | 1888 | 1949 | 10.8024216556 |
| NM_018231    | SLC38A7 | 1533 | 1601 | 9.21344828574 |
| NM_018231    | SLC38A7 | 2085 | 2144 | 9.21344828574 |
| NM_018231    | SLC38A7 | 1260 | 1338 | 11.5393939808 |
| NM_018231    | SLC38A7 | 722  | 784  | 11.5393939806 |
| NM_018231    | SLC38A7 | 2357 | 2429 | 9.21344828574 |
| NM_001111322 | DDX54   | 687  | 785  | 6.25575653529 |
| NM_001111322 | DDX54   | 1358 | 1416 | 5.25575652774 |
| NM_001111322 | DDX54   | 47   | 106  | 5.1716173259  |
| NM_001111322 | DDX54   | 1176 | 1236 | 4.25173893511 |
| NM_001111322 | DDX54   | 1678 | 1748 | 4.25574980423 |
| NM_001111322 | DDX54   | 2210 | 2299 | 4.25575629937 |
| NM_000629    | IFNAR1  | 1927 | 2003 | 8.06269573055 |
| NM_000629    | IFNAR1  | 1322 | 1397 | 7.47790674422 |
| NM_000629    | IFNAR1  | 1062 | 1139 | 8.06286948064 |
| NM_000629    | IFNAR1  | 654  | 707  | 6.39376777076 |
| NM_000629    | IFNAR1  | 265  | 334  | 8.79983507481 |
| NM_000629    | IFNAR1  | 5374 | 5490 | 7.47790697259 |
| NM_000629    | IFNAR1  | 1568 | 1644 | 8.06286924495 |
| NM_000629    | IFNAR1  | 1154 | 1297 | 9.06286948086 |
| NM_001134673 | NFIA    | 358  | 406  | 10.3097410099 |
| NM_001134673 | NFIA    | 480  | 524  | 8.72076090903 |
| NM_014165    | NDUFAF4 | 240  | 286  | 6.81019455703 |
| NM_014165    | NDUFAF4 | 632  | 675  | 8.47527866697 |
| NM_014165    | NDUFAF4 | 414  | 507  | 9.21626185376 |
| NM_198830    | ACLY    | 1082 | 1176 | 6.23098685965 |
| NM_198830    | ACLY    | 4050 | 4091 | 5.22696925948 |
| NM_198830    | ACLY    | 2768 | 2894 | 7.23098685965 |
| NM_198830    | ACLY    | 339  | 417  | 4.64602435893 |
| NM_198830    | ACLY    | 1179 | 1272 | 5.64602435893 |
| NM_198830    | ACLY    | 911  | 1082 | 6.96795245382 |

|              |        |      |      |               |
|--------------|--------|------|------|---------------|
| NM_198830    | ACLY   | 3899 | 4002 | 6.96795245382 |
| NM_198830    | ACLY   | 4102 | 4324 | 7.96795245382 |
| NM_198830    | ACLY   | 1308 | 1423 | 5.23098685965 |
| NM_198830    | ACLY   | 2583 | 2766 | 5.64602435893 |
| NM_198830    | ACLY   | 1446 | 1587 | 5.64602435893 |
| NM_198830    | ACLY   | 2917 | 3528 | 9.13787745526 |
| NM_198830    | ACLY   | 77   | 293  | 7.89395187237 |
| NM_198830    | ACLY   | 2097 | 2570 | 9.03834178171 |
| NM_198830    | ACLY   | 1624 | 2094 | 8.89395187237 |
| NM_198830    | ACLY   | 3648 | 3784 | 7.55291495454 |
| NM_198830    | ACLY   | 446  | 849  | 7.89395187237 |
| NM_001242883 | CARKD  | 2206 | 2262 | 8.73688439037 |
| NM_001242883 | CARKD  | 2057 | 2096 | 8.73688439037 |
| NM_001242883 | CARKD  | 1165 | 1220 | 7.15209540405 |
| NM_001242883 | CARKD  | 1357 | 1409 | 7.15192188965 |
| NM_001242883 | CARKD  | 379  | 507  | 9.73705814069 |
| NM_001242883 | CARKD  | 1879 | 1963 | 9.15209563997 |
| NM_001242883 | CARKD  | 970  | 1052 | 9.15209540405 |
| NM_003937    | KYNU   | 8    | 66   | 5.72771721021 |
| NM_003937    | KYNU   | 651  | 718  | 4.72771721021 |
| NM_003937    | KYNU   | 467  | 517  | 4.72771721021 |
| NM_003937    | KYNU   | 524  | 560  | 5.647595601   |
| NM_003937    | KYNU   | 866  | 936  | 6.73172807933 |
| NM_003937    | KYNU   | 1068 | 1167 | 7.3166973111  |
| NM_016952    | CDON   | 7293 | 7340 | 7.70996408619 |
| NM_016952    | CDON   | 2871 | 2939 | 9.29894418708 |
| NM_016952    | CDON   | 1509 | 1561 | 8.71398167881 |
| NM_016952    | CDON   | 960  | 988  | 7.70996408619 |
| NM_016952    | CDON   | 4551 | 4598 | 7.71398145044 |
| NM_016952    | CDON   | 3417 | 3478 | 7.70996408619 |
| NM_016952    | CDON   | 123  | 197  | 10.0359097812 |
| NM_016952    | CDON   | 216  | 281  | 9.71398167881 |
| NM_016952    | CDON   | 1194 | 1332 | 10.2989441871 |
| NM_016226    | VPS29  | 55   | 130  | 6.96981552069 |
| NM_016226    | VPS29  | 585  | 698  | 5.96981552069 |
| NM_016226    | VPS29  | 224  | 350  | 8.29174361558 |
| NM_016220    | ZNF107 | 2600 | 2622 | 11.5992212262 |
| NM_016220    | ZNF107 | 457  | 503  | 11.5990474834 |
| NM_016220    | ZNF107 | 198  | 260  | 10.5992145027 |
| NM_016221    | DCTN4  | 2320 | 2360 | 5.38291562877 |
| NM_016221    | DCTN4  | 741  | 790  | 7.05184358856 |
| NM_016221    | DCTN4  | 859  | 929  | 5.46303723798 |
| NM_016221    | DCTN4  | 1229 | 1280 | 7.05201733887 |
| NM_016221    | DCTN4  | 424  | 485  | 7.78898293303 |
| NM_016221    | DCTN4  | 568  | 685  | 7.46705483815 |
| NM_016221    | DCTN4  | 1793 | 1933 | 7.05201733132 |
| NM_018233    | OGFOD1 | 62   | 97   | 6.25756070841 |
| NM_018233    | OGFOD1 | 823  | 963  | 7.57966255361 |
| NM_018233    | OGFOD1 | 255  | 314  | 7.57966255361 |
| NM_018233    | OGFOD1 | 699  | 789  | 6.84269695945 |

|              |          |      |      |               |
|--------------|----------|------|------|---------------|
| NM_018233    | OGFOD1   | 635  | 680  | 5.25371685855 |
| NM_018233    | OGFOD1   | 1731 | 1806 | 6.25756070841 |
| NM_018233    | OGFOD1   | 436  | 491  | 6.84269672353 |
| NM_018233    | OGFOD1   | 495  | 560  | 6.25772772767 |
| NM_018233    | OGFOD1   | 996  | 1055 | 5.25756070841 |
| NM_018233    | OGFOD1   | 381  | 436  | 6.84252320913 |
| NM_018233    | OGFOD1   | 1463 | 1529 | 6.84269022839 |
| NM_016223    | PAC SIN3 | 815  | 854  | 4.90954771492 |
| NM_016223    | PAC SIN3 | 1735 | 1801 | 4.98966932414 |
| NM_016223    | PAC SIN3 | 1323 | 1387 | 4.98966932414 |
| NM_016223    | PAC SIN3 | 122  | 172  | 4.99368019325 |
| NM_001080950 | MY01C    | 739  | 803  | 6.61110378428 |
| NM_001080950 | MY01C    | 3091 | 3131 | 7.19606628501 |
| NM_001080950 | MY01C    | 3453 | 3493 | 7.19605955395 |
| NM_001080950 | MY01C    | 2604 | 2647 | 5.61110378406 |
| NM_001080950 | MY01C    | 4469 | 4550 | 7.196066285   |
| NM_001080950 | MY01C    | 970  | 1054 | 5.61110378428 |
| NM_001080950 | MY01C    | 1642 | 1735 | 8.19606628501 |
| NM_001080950 | MY01C    | 331  | 414  | 7.61110378428 |
| NM_001080950 | MY01C    | 117  | 165  | 5.61109705323 |
| NM_001080950 | MY01C    | 1739 | 1784 | 5.61109705323 |
| NM_001080950 | MY01C    | 1405 | 1499 | 8.93303187917 |
| NM_001080950 | MY01C    | 2706 | 2775 | 6.61110378428 |
| NM_001080950 | MY01C    | 819  | 906  | 8.61110378428 |
| NM_001080950 | MY01C    | 4655 | 4683 | 5.61109705323 |
| NM_001080950 | MY01C    | 1055 | 1111 | 5.61109705323 |
| NM_001080950 | MY01C    | 540  | 637  | 6.61110378428 |
| NM_001080950 | MY01C    | 3511 | 3774 | 9.19606628501 |
| NM_001080950 | MY01C    | 1131 | 1301 | 9.07053540292 |
| NM_001080950 | MY01C    | 2245 | 2315 | 7.19606628501 |
| NM_001080950 | MY01C    | 2106 | 2240 | 7.93303187917 |
| NM_001080950 | MY01C    | 1501 | 1583 | 5.61110378428 |
| NM_001080950 | MY01C    | 167  | 324  | 8.61110378428 |
| NM_001080950 | MY01C    | 2652 | 2696 | 5.5269645749  |
| NM_001080950 | MY01C    | 2431 | 2596 | 7.61110378428 |
| NM_001080950 | MY01C    | 2792 | 3034 | 9.07053540292 |
| NM_001080950 | MY01C    | 3160 | 3298 | 8.41845870634 |
| NM_001080953 | PLAGL1   | 1711 | 1755 | 10.7579299052 |
| NM_001080953 | PLAGL1   | 2755 | 2800 | 9.8418953643  |
| NM_001080953 | PLAGL1   | 725  | 775  | 9.84206238357 |
| NM_001080953 | PLAGL1   | 2816 | 2870 | 10.8380515144 |
| NM_001080953 | PLAGL1   | 327  | 388  | 10.8418953643 |
| NM_001080953 | PLAGL1   | 1935 | 1978 | 9.75792990524 |
| NM_001080953 | PLAGL1   | 2315 | 2396 | 9.84206910707 |
| NM_138639    | BCL2L12  | 1122 | 1190 | 7.98468284092 |
| NM_138639    | BCL2L12  | 1370 | 1462 | 6.98468284092 |
| NM_138639    | BCL2L12  | 1639 | 1711 | 8.98468284092 |
| NM_138639    | BCL2L12  | 991  | 1036 | 8.56963861059 |
| NM_003938    | AP3D1    | 4658 | 4715 | 5.28109077168 |
| NM_003938    | AP3D1    | 2616 | 2677 | 5.27707340742 |

|           |          |      |      |               |               |
|-----------|----------|------|------|---------------|---------------|
| NM_003938 | AP3D1    | 3054 | 3102 | 5.28109077168 |               |
| NM_003938 | AP3D1    | 4594 | 4652 | 5.28091725728 |               |
| NM_003938 | AP3D1    | 3103 | 3157 | 5.28109077168 |               |
| NM_003938 | AP3D1    | 2681 | 2767 | 4.28109077168 |               |
| NM_003938 | AP3D1    | 4719 | 4775 | 4.28109100759 |               |
| NM_003938 | AP3D1    | 2072 | 2131 | 4.28091725728 |               |
| NM_003938 | AP3D1    | 4037 | 4085 | 4.27707340742 |               |
| NM_003938 | AP3D1    | 3737 | 3904 | 8.52901852104 |               |
| NM_003938 | AP3D1    | 1455 | 1538 | 5.28109100737 |               |
| NM_003938 | AP3D1    | 817  | 893  | 5.28109100759 |               |
| NM_003938 | AP3D1    | 255  | 321  | 5.28109100737 |               |
| NM_003938 | AP3D1    | 4207 | 4260 | 5.86605350809 |               |
| NM_003938 | AP3D1    | 1395 | 1439 | 5.28109100737 |               |
| NM_003938 | AP3D1    | 3498 | 3706 | 7.60301910248 |               |
| NM_003938 | AP3D1    | 4476 | 4553 | 5.8660532724  |               |
| NM_003938 | AP3D1    | 1623 | 1731 | 6.28109100759 |               |
| NM_003938 | AP3D1    | 1123 | 1389 | 7.60301910248 |               |
| NM_003938 | AP3D1    | 3296 | 3495 | 7.98153072574 |               |
| NM_003938 | AP3D1    | 351  | 449  | 6.60301910248 |               |
| NM_003938 | AP3D1    | 894  | 1122 | 8.45101600904 |               |
| NM_003938 | AP3D1    | 1952 | 2022 | 6.28109077168 |               |
| NM_003938 | AP3D1    | 2266 | 2376 | 6.28109100759 |               |
| NM_003938 | AP3D1    | 702  | 803  | 6.28109100759 |               |
| NM_205861 | DHDDS    | 740  | 795  | 6.87783007786 |               |
| NM_032590 | KDM2B    | 3988 | 4071 | 8.57645850405 |               |
| NM_003939 | BTRC     | 1007 | 1083 | 6.26946717155 |               |
| NM_194326 | RPS19BP1 |      | 655  | 697           | 3.31254025429 |
| NM_194326 | RPS19BP1 |      | 497  | 567           | 4.90152035519 |
| NM_194326 | RPS19BP1 |      | 242  | 405           | 5.90152035519 |
| NM_194326 | RPS19BP1 |      | 724  | 908           | 4.90152035519 |
| NM_032591 | SLC9A7   | 740  | 812  | 9.94079357592 |               |
| NM_032591 | SLC9A7   | 906  | 946  | 9.85666109759 |               |
| NM_032591 | SLC9A7   | 953  | 1004 | 10.5257625718 |               |
| NM_032591 | SLC9A7   | 817  | 867  | 8.9367827068  |               |
| NM_032591 | SLC9A7   | 8266 | 8342 | 9.85666109759 |               |
| NM_134323 | TARBP2   | 828  | 904  | 9.11642708784 |               |
| NM_134323 | TARBP2   | 1355 | 1403 | 8.032287886   |               |
| NM_032593 | HINT2    | 141  | 195  | 6.54832801029 |               |
| NM_032593 | HINT2    | 304  | 389  | 7.54815449589 |               |
| NM_001008 | RPS4Y1   | 286  | 315  | 2.0720024035  |               |
| NM_001009 | RPS5     | 17   | 207  | 5.08836362385 |               |
| NM_001009 | RPS5     | 241  | 728  | 6.29481450131 |               |
| NM_004078 | CSRP1    | 844  | 929  | 11.6309197851 |               |
| NM_004078 | CSRP1    | 569  | 630  | 10.8235648628 |               |
| NM_004078 | CSRP1    | 514  | 551  | 10.4083536134 |               |
| NM_004078 | CSRP1    | 1689 | 1755 | 9.82356485544 |               |
| NM_004078 | CSRP1    | 1851 | 1913 | 8.82339111267 |               |
| NM_004078 | CSRP1    | 1452 | 1571 | 11.4085273637 |               |
| NM_004079 | CTSS     | 1335 | 1376 | 11.7526232129 |               |
| NM_004079 | CTSS     | 578  | 652  | 12.8367624223 |               |

|           |       |      |      |                |
|-----------|-------|------|------|----------------|
| NM_004079 | CTSS  | 1061 | 1088 | 10.2477823214  |
| NM_004079 | CTSS  | 330  | 418  | 11.8367624148  |
| NM_004079 | CTSS  | 461  | 513  | 12.2517999216  |
| NM_004079 | CTSS  | 520  | 564  | 11.2517931905  |
| NM_004079 | CTSS  | 658  | 704  | 11.8367556913  |
| NM_004079 | CTSS  | 897  | 989  | 11.2516261713  |
| NM_004079 | CTSS  | 1279 | 1334 | 11.8367556913  |
| NM_004079 | CTSS  | 994  | 1046 | 11.8327448221  |
| NM_004079 | CTSS  | 1620 | 1659 | 10.2517931905  |
| NM_004079 | CTSS  | 255  | 314  | 13.2517999216  |
| NM_004079 | CTSS  | 729  | 788  | 11.2517931905  |
| NM_004079 | CTSS  | 2907 | 2960 | 10.251799914   |
| NM_004079 | CTSS  | 1090 | 1215 | 11.8367624223  |
| NM_004079 | CTSS  | 789  | 887  | 11.8367624223  |
| NM_001004 | RPLP2 | 356  | 472  | 1.46984831182  |
| NM_001004 | RPLP2 | 59   | 356  | 3.46984831182  |
| NM_001005 | RPS3  | 781  | 848  | 1.26909082391  |
| NM_001005 | RPS3  | 69   | 593  | 4.01325191948  |
| NM_001005 | RPS3  | 598  | 722  | 1.64760244717  |
| NM_001554 | CYR61 | 1512 | 1591 | 9.5933555023   |
| NM_001554 | CYR61 | 1321 | 1391 | 7.78599384919  |
| NM_001554 | CYR61 | 1255 | 1297 | 7.70186137086  |
| NM_001554 | CYR61 | 1615 | 1690 | 6.78600058002  |
| NM_001554 | CYR61 | 567  | 673  | 9.37096308096  |
| NM_001554 | CYR61 | 145  | 223  | 7.78600057269  |
| NM_001554 | CYR61 | 1112 | 1247 | 9.5933555023   |
| NM_001554 | CYR61 | 746  | 850  | 8.78600058024  |
| NM_001554 | CYR61 | 678  | 741  | 8.78600034432  |
| NM_001554 | CYR61 | 929  | 1063 | 9.5933555023   |
| NM_001554 | CYR61 | 1401 | 1512 | 8.37096308096  |
| NM_001554 | CYR61 | 443  | 559  | 7.78600058024  |
| NM_001007 | RPS4X | 286  | 378  | 3.1711510551   |
| NM_001007 | RPS4X | 382  | 454  | 3.63058267374  |
| NM_001007 | RPS4X | 564  | 727  | 4.56346847788  |
| NM_001007 | RPS4X | 203  | 278  | 2.75611355582  |
| NM_001007 | RPS4X | 458  | 542  | 2.49307914999  |
| NM_001007 | RPS4X | 735  | 954  | 3.75611355582  |
| NM_001007 | RPS4X | 64   | 203  | 3.49307914999  |
| NM_001000 | RPL39 | 36   | 129  | 2.32506441368  |
| NM_001000 | RPL39 | 263  | 400  | 3.59808290808  |
| NM_001000 | RPL39 | 131  | 257  | 2.06203000784  |
| NM_001002 | RPLP0 | 978  | 1026 | 0.498459258394 |
| NM_001002 | RPLP0 | 1058 | 1139 | 2.49845925839  |
| NM_001002 | RPLP0 | 884  | 964  | 1.82038735328  |
| NM_001002 | RPLP0 | 236  | 504  | 4.85601126301  |
| NM_001002 | RPLP0 | 508  | 883  | 5.08342175912  |
| NM_001002 | RPLP0 | 119  | 230  | 1.82038735328  |
| NM_001003 | RPLP1 | 389  | 510  | 3.9603371003   |
| NM_001003 | RPLP1 | 18   | 348  | 5.20826461374  |
| NM_000201 | ICAM1 | 625  | 727  | 7.25973384959  |

|           |       |      |      |                  |
|-----------|-------|------|------|------------------|
| NM_000201 | ICAM1 | 2294 | 2429 | 7.25973384959    |
| NM_000201 | ICAM1 | 2006 | 2291 | 8.84469635031    |
| NM_000201 | ICAM1 | 2432 | 2694 | 9.08980884815    |
| NM_000201 | ICAM1 | 290  | 619  | 9.08980884815    |
| NM_000201 | ICAM1 | 757  | 822  | 4.08980884815    |
| NM_000201 | ICAM1 | 2707 | 3090 | 9.04400515854    |
| NM_000201 | ICAM1 | 824  | 2005 | 11.2597338496    |
| NM_000201 | ICAM1 | 3098 | 3225 | 5.67477134887    |
| NM_000972 | RPL7A | 325  | 417  | 1.70314140217    |
| NM_000972 | RPL7A | 449  | 567  | 3.1625730208     |
| NM_000972 | RPL7A | 571  | 872  | 4.79060424342    |
| NM_000972 | RPL7A | 207  | 321  | 2.02506949705    |
| NM_000972 | RPL7A | 38   | 206  | 3.40358112031    |
| NM_000971 | RPL7  | 148  | 329  | 1.6310461629     |
| NM_000971 | RPL7  | 689  | 824  | 0.968081150177   |
| NM_000971 | RPL7  | 329  | 686  | 3.13800615162    |
| NM_000971 | RPL7  | 3    | 139  | -0.0319188498232 |
| NM_000970 | RPL6  | 842  | 918  | 5.33330453386    |
| NM_000970 | RPL6  | 702  | 841  | 4.33330453386    |
| NM_000970 | RPL6  | 105  | 140  | 1.33313078354    |
| NM_000970 | RPL6  | 278  | 696  | 6.82515763018    |
| NM_000977 | RPL13 | 10   | 50   | 3.55412254717    |
| NM_000977 | RPL13 | 994  | 1032 | 0.742750025164   |
| NM_000977 | RPL13 | 64   | 209  | 4.06869572022    |
| NM_000977 | RPL13 | 886  | 978  | 3.33173012606    |
| NM_000977 | RPL13 | 709  | 778  | 3.33173012606    |
| NM_000977 | RPL13 | 779  | 886  | 3.06869572022    |
| NM_000977 | RPL13 | 610  | 698  | 2.33173012606    |
| NM_000977 | RPL13 | 273  | 600  | 4.91669262678    |
| NM_133645 | MT01  | 810  | 866  | 5.64980367043    |
| NM_133645 | MT01  | 403  | 447  | 7.73394287959    |
| NM_133645 | MT01  | 460  | 505  | 6.73376912949    |
| NM_133645 | MT01  | 1670 | 1774 | 6.73393614876    |
| NM_133645 | MT01  | 67   | 122  | 5.73376912949    |
| NM_133645 | MT01  | 2447 | 2511 | 7.31890538053    |
| NM_133645 | MT01  | 1357 | 1471 | 8.31890538053    |
| NM_133645 | MT01  | 176  | 243  | 6.72992527964    |
| NM_133645 | MT01  | 1535 | 1622 | 8.0558709747     |
| NM_133645 | MT01  | 681  | 810  | 7.31890538053    |
| NM_000975 | RPL11 | 325  | 513  | 4.09121216919    |
| NM_000975 | RPL11 | 85   | 303  | 4.35424657503    |
| NM_007254 | PNKP  | 896  | 943  | 7.5840157413     |
| NM_007254 | PNKP  | 613  | 658  | 7.66798120037    |
| NM_007254 | PNKP  | 1102 | 1157 | 9.66815495046    |
| NM_007254 | PNKP  | 1450 | 1524 | 9.24909985123    |
| NM_000208 | INSR  | 5816 | 5852 | 6.22908833353    |
| NM_000208 | INSR  | 1121 | 1184 | 7.2331059337     |
| NM_000208 | INSR  | 4425 | 4477 | 7.2331059337     |
| NM_000208 | INSR  | 6530 | 6595 | 7.23310592615    |
| NM_000208 | INSR  | 8144 | 8197 | 6.22908833353    |



|           |       |      |      |               |
|-----------|-------|------|------|---------------|
| NM_000208 | INSR  | 4043 | 4111 | 8.2331059337  |
| NM_000208 | INSR  | 1722 | 1799 | 9.40303093514 |
| NM_000208 | INSR  | 857  | 1023 | 9.55503402859 |
| NM_000208 | INSR  | 4630 | 4680 | 6.23310593348 |
| NM_000208 | INSR  | 2366 | 2439 | 7.2331059337  |
| NM_000208 | INSR  | 3285 | 3336 | 6.2331059337  |
| NM_000208 | INSR  | 4757 | 4803 | 7.81806170337 |
| NM_000208 | INSR  | 728  | 801  | 8.55503402859 |
| NM_000208 | INSR  | 1595 | 1717 | 10.0404608558 |
| NM_000208 | INSR  | 8062 | 8131 | 7.8180684342  |
| NM_000208 | INSR  | 4814 | 4896 | 6.2331059337  |
| NM_000208 | INSR  | 1185 | 1247 | 7.81806843442 |
| NM_000208 | INSR  | 4500 | 4534 | 6.23310569778 |
| NM_000208 | INSR  | 535  | 690  | 9.93354565184 |
| NM_000208 | INSR  | 7379 | 7470 | 8.23310569778 |
| NM_000208 | INSR  | 5126 | 5176 | 6.14896672432 |
| NM_000208 | INSR  | 6658 | 6730 | 7.23310569778 |
| NM_000208 | INSR  | 5272 | 5305 | 7.14896672432 |
| NM_000208 | INSR  | 4904 | 4979 | 6.22908833353 |
| NM_000208 | INSR  | 4294 | 4399 | 9.40303093514 |
| NM_000208 | INSR  | 2964 | 3030 | 8.81806843442 |
| NM_000208 | INSR  | 7000 | 7041 | 6.23309920265 |
| NM_000208 | INSR  | 5902 | 6013 | 8.81806843442 |
| NM_000208 | INSR  | 3199 | 3256 | 7.23309920265 |
| NM_000208 | INSR  | 2623 | 2960 | 10.8180684344 |
| NM_000208 | INSR  | 3385 | 3495 | 9.04046085576 |
| NM_000208 | INSR  | 5595 | 5753 | 9.81806843442 |
| NM_000208 | INSR  | 5457 | 5533 | 7.2331059337  |
| NM_000208 | INSR  | 7904 | 8023 | 8.2331059337  |
| NM_000208 | INSR  | 3720 | 3937 | 10.2331059337 |
| NM_000208 | INSR  | 6070 | 6189 | 9.04046085576 |
| NM_000208 | INSR  | 4990 | 5083 | 8.23310593369 |
| NM_000208 | INSR  | 2200 | 2346 | 9.69253755234 |
| NM_000208 | INSR  | 1855 | 2046 | 10.4810334471 |
| NM_000208 | INSR  | 8850 | 8896 | 6.22908833353 |
| NM_000208 | INSR  | 226  | 525  | 10.9335456518 |
| NM_000208 | INSR  | 2499 | 2609 | 9.2331059337  |
| NM_000208 | INSR  | 1258 | 1550 | 9.93354565184 |
| NM_000208 | INSR  | 2090 | 2199 | 9.2331059337  |
| NM_000208 | INSR  | 7272 | 7368 | 8.81806843442 |
| NM_000208 | INSR  | 3509 | 3679 | 10.4030309351 |
| NM_000208 | INSR  | 3062 | 3199 | 9.55503402859 |
| NM_000208 | INSR  | 3944 | 4012 | 8.2331059337  |
| NM_000208 | INSR  | 6830 | 6976 | 8.2331059337  |
| NM_000208 | INSR  | 4162 | 4250 | 6.2331059337  |
| NM_007259 | VPS45 | 881  | 945  | 7.95918811348 |
| NM_007259 | VPS45 | 2472 | 2511 | 8.37422561276 |
| NM_007259 | VPS45 | 1138 | 1241 | 7.45836458623 |
| NM_007259 | VPS45 | 593  | 692  | 8.04332732265 |
| NM_007259 | VPS45 | 1564 | 1664 | 8.45836458623 |

|              |         |      |      |               |
|--------------|---------|------|------|---------------|
| NM_000978    | RPL23   | 71   | 519  | 1.69750542602 |
| NM_017798    | YTHDF1  | 511  | 592  | 7.55974735579 |
| NM_017798    | YTHDF1  | 3094 | 3189 | 6.97478485507 |
| NM_017798    | YTHDF1  | 2901 | 2974 | 5.97478485507 |
| NM_017798    | YTHDF1  | 1985 | 2028 | 5.89064564568 |
| NM_017798    | YTHDF1  | 1691 | 1765 | 6.97076725489 |
| NM_017798    | YTHDF1  | 1388 | 1503 | 7.97478485507 |
| NM_017798    | YTHDF1  | 2775 | 2886 | 6.97478485507 |
| NM_017798    | YTHDF1  | 2048 | 2228 | 8.78213977713 |
| NM_017798    | YTHDF1  | 286  | 417  | 5.97478485507 |
| NM_001193475 | KLRAQ1  | 679  | 731  | 4.73788766211 |
| NM_017791    | FLVCR2  | 1263 | 1347 | 10.3687589664 |
| NM_017791    | FLVCR2  | 735  | 804  | 8.3647413665  |
| NM_017791    | FLVCR2  | 183  | 213  | 8.28461975729 |
| NM_017791    | FLVCR2  | 988  | 1062 | 8.3647413665  |
| NM_017791    | FLVCR2  | 1395 | 1475 | 10.3687522356 |
| NM_017790    | RGS3    | 1528 | 1566 | 7.41037712655 |
| NM_017790    | RGS3    | 784  | 850  | 8.49450960489 |
| NM_017790    | RGS3    | 256  | 376  | 7.49451633594 |
| NM_017797    | BTBD2   | 1668 | 1707 | 5.25987094943 |
| NM_017797    | BTBD2   | 1277 | 1329 | 6.84500696455 |
| NM_017797    | BTBD2   | 2387 | 2436 | 5.17590549036 |
| NM_017797    | BTBD2   | 330  | 388  | 6.26003796869 |
| NM_017797    | BTBD2   | 418  | 562  | 7.58197279463 |
| NM_017797    | BTBD2   | 685  | 846  | 6.84500720046 |
| NM_030768    | ILKAP   | 787  | 874  | 6.79493107594 |
| NM_145886    | PIDD    | 2195 | 2240 | 9.4098368741  |
| NM_145886    | PIDD    | 1728 | 1807 | 10.0789385767 |
| NM_199329    | SLC43A3 | 1908 | 1990 | 11.6271013674 |
| NM_199329    | SLC43A3 | 886  | 967  | 13.4344562894 |
| NM_199329    | SLC43A3 | 136  | 169  | 11.626927617  |
| NM_199329    | SLC43A3 | 270  | 316  | 10.6270946363 |
| NM_199329    | SLC43A3 | 1554 | 1665 | 13.7970263688 |
| NM_199329    | SLC43A3 | 1674 | 1804 | 13.7970263688 |
| NM_199329    | SLC43A3 | 1279 | 1507 | 13.7970263688 |
| NM_199329    | SLC43A3 | 1120 | 1266 | 14.2120638681 |
| NM_199329    | SLC43A3 | 668  | 871  | 14.6271013674 |
| NM_199329    | SLC43A3 | 369  | 520  | 14.2120638681 |
| NM_199329    | SLC43A3 | 2444 | 2605 | 13.7970263688 |
| NM_199329    | SLC43A3 | 2358 | 2439 | 11.6271013674 |
| NM_199329    | SLC43A3 | 2121 | 2218 | 13.4344562894 |
| NM_199329    | SLC43A3 | 177  | 242  | 11.6271013674 |
| NM_003952    | RPS6KB2 | 68   | 125  | 7.74246028913 |
| NM_003952    | RPS6KB2 | 1077 | 1118 | 7.6583278108  |
| NM_003952    | RPS6KB2 | 853  | 905  | 6.74229326986 |
| NM_003952    | RPS6KB2 | 779  | 851  | 7.74246028913 |
| NM_003952    | RPS6KB2 | 430  | 484  | 6.6583278108  |
| NM_003952    | RPS6KB2 | 140  | 334  | 8.3274295209  |
| NM_003953    | MPZL1   | 330  | 430  | 8.56795294271 |
| NM_003953    | MPZL1   | 912  | 966  | 6.76059802066 |

|           |         |      |      |               |
|-----------|---------|------|------|---------------|
| NM_003953 | MPZL1   | 2916 | 2968 | 7.3415429212  |
| NM_003953 | MPZL1   | 1208 | 1300 | 8.34556052138 |
| NM_003953 | MPZL1   | 1769 | 1797 | 7.26142131199 |
| NM_003953 | MPZL1   | 2404 | 2462 | 5.76059802043 |
| NM_003953 | MPZL1   | 966  | 1069 | 8.34556052138 |
| NM_003953 | MPZL1   | 595  | 868  | 10.3455605214 |
| NM_003953 | MPZL1   | 3039 | 3083 | 6.67645881127 |
| NM_003953 | MPZL1   | 256  | 319  | 6.76059802066 |
| NM_003953 | MPZL1   | 1326 | 1463 | 8.56795294271 |
| NM_003953 | MPZL1   | 134  | 229  | 6.76059802066 |
| NM_003953 | MPZL1   | 451  | 557  | 9.22002963929 |
| NM_003953 | MPZL1   | 2487 | 2691 | 9.34556052138 |
| NM_003953 | MPZL1   | 2775 | 2855 | 5.76059778474 |
| NM_199320 | PHF17   | 882  | 937  | 8.20143608667 |
| NM_199320 | PHF17   | 819  | 872  | 8.20143608667 |
| NM_199320 | PHF17   | 710  | 801  | 7.61648031678 |
| NM_003958 | RNF8    | 1588 | 1670 | 5.22136327389 |
| NM_003958 | RNF8    | 1489 | 1556 | 3.21735240477 |
| NM_003958 | RNF8    | 364  | 422  | 4.22119625462 |
| NM_003958 | RNF8    | 1859 | 1993 | 5.80633250566 |
| NM_003959 | HIP1R   | 1101 | 1164 | 6.90795031923 |
| NM_003959 | HIP1R   | 3570 | 3627 | 8.492919551   |
| NM_003959 | HIP1R   | 3430 | 3487 | 7.90795704273 |
| NM_003959 | HIP1R   | 2508 | 2569 | 8.48890195083 |
| NM_020640 | DCUN1D1 | 1045 | 1110 | 6.00546817783 |
| NM_020640 | DCUN1D1 | 737  | 794  | 6.00162432797 |
| NM_020640 | DCUN1D1 | 3071 | 3132 | 6.59060419295 |
| NM_020640 | DCUN1D1 | 905  | 1033 | 6.59060442887 |
| NM_020644 | TMEM9B  | 1571 | 1619 | 7.67574070859 |
| NM_020644 | TMEM9B  | 644  | 694  | 7.67574070859 |
| NM_020644 | TMEM9B  | 781  | 837  | 9.26087695963 |
| NM_020644 | TMEM9B  | 464  | 599  | 9.67591445891 |
| NM_020644 | TMEM9B  | 698  | 769  | 8.67591445891 |
| NM_020644 | TMEM9B  | 1021 | 1132 | 8.9978425538  |
| NM_020644 | TMEM9B  | 1150 | 1187 | 6.59177524953 |
| NM_020648 | TWSG1   | 1435 | 1465 | 8.94720025641 |
| NM_020648 | TWSG1   | 372  | 435  | 10.3532675607 |
| NM_020648 | TWSG1   | 807  | 873  | 8.03133946557 |
| NM_024940 | DOCK5   | 6815 | 6864 | 5.6766767588  |
| NM_024940 | DOCK5   | 6706 | 6785 | 6.67684377806 |
| NM_024940 | DOCK5   | 2171 | 2234 | 6.59271129973 |
| NM_024940 | DOCK5   | 6023 | 6096 | 6.6766767588  |
| NM_024940 | DOCK5   | 6969 | 7043 | 5.6766767588  |
| NM_024940 | DOCK5   | 193  | 225  | 5.6766767588  |
| NM_024940 | DOCK5   | 3774 | 3830 | 5.67684377806 |
| NM_024940 | DOCK5   | 2621 | 2659 | 6.59271129973 |
| NM_024940 | DOCK5   | 6235 | 6291 | 7.6766767588  |
| NM_024940 | DOCK5   | 2918 | 2968 | 6.6766767588  |
| NM_024940 | DOCK5   | 6096 | 6214 | 6.67685050912 |
| NM_024946 | FAM192A | 258  | 343  | 1.98628720117 |

|           |          |      |      |                    |
|-----------|----------|------|------|--------------------|
| NM_024946 | FAM192A  | 1217 | 1261 | 3.48711072843      |
| NM_024946 | FAM192A  | 759  | 808  | 1.90214822771      |
| NM_024946 | FAM192A  | 467  | 518  | 2.98628070604      |
| NM_024946 | FAM192A  | 545  | 623  | 1.98226983692      |
| NM_024948 | FAM188A  | 293  | 338  | 6.91553003407      |
| NM_017575 | SMG6     | 3745 | 3797 | 7.81223438317      |
| NM_017575 | SMG6     | 1439 | 1479 | 6.22727188244      |
| NM_006503 | PSMC4    | 604  | 641  | 5.1999479975       |
| NM_006503 | PSMC4    | 176  | 264  | 7.09144212894      |
| NM_006503 | PSMC4    | 523  | 590  | 6.28408720688      |
| NM_006503 | PSMC4    | 982  | 1171 | 8.09144212894      |
| NM_006503 | PSMC4    | 435  | 519  | 7.45401220832      |
| NM_006503 | PSMC4    | 270  | 432  | 7.45401220832      |
| NM_006503 | PSMC4    | 1182 | 1530 | 9.28408720688      |
| NM_006503 | PSMC4    | 648  | 958  | 8.37155004813      |
| NM_173666 | DTWD2    | 2827 | 2861 | 7.77465643316      |
| NM_173666 | DTWD2    | 2873 | 2924 | 7.77867402579      |
| NM_004698 | PRPF3    | 303  | 391  | 6.90108004353      |
| NM_004698 | PRPF3    | 69   | 171  | 4.57915194865      |
| NM_004698 | PRPF3    | 2280 | 2347 | 7.16411444937      |
| NM_004698 | PRPF3    | 2161 | 2229 | 6.16411444937      |
| NM_004698 | PRPF3    | 988  | 1044 | 4.57513434847      |
| NM_004698 | PRPF3    | 1129 | 1231 | 6.90108004353      |
| NM_004699 | FAM50A   | 589  | 632  | 5.4748130201       |
| NM_004699 | FAM50A   | 1276 | 1355 | 6.06379311345      |
| NM_004699 | FAM50A   | 685  | 755  | 4.47882388922      |
| NM_004699 | FAM50A   | 237  | 319  | 6.063793121        |
| NM_004699 | FAM50A   | 802  | 1047 | 7.93826223891      |
| NM_004690 | LATS1    | 666  | 709  | 8.14201532455      |
| NM_004690 | LATS1    | 5535 | 5597 | 7.05788284622      |
| NM_004690 | LATS1    | 3032 | 3111 | 9.14202181969      |
| NM_004690 | LATS1    | 5971 | 6017 | 7.14201532455      |
| NM_004690 | LATS1    | 2620 | 2689 | 8.13800445543      |
| NM_004691 | ATP6V0D1 |      | 1287 | 1381 6.2918803704  |
| NM_004691 | ATP6V0D1 |      | 96   | 184 8.09923529246  |
| NM_004691 | ATP6V0D1 |      | 206  | 333 8.46180537185  |
| NM_004691 | ATP6V0D1 |      | 1136 | 1266 8.09923529246 |
| NM_004691 | ATP6V0D1 |      | 509  | 655 7.87684287113  |
| NM_004691 | ATP6V0D1 |      | 763  | 1106 9.53980788385 |
| NM_007057 | ZWINT    | 1399 | 1435 | 5.49898733436      |
| NM_007057 | ZWINT    | 1448 | 1492 | 5.99981735675      |
| NM_007057 | ZWINT    | 198  | 283  | 6.8209221603       |
| NM_007057 | ZWINT    | 1063 | 1147 | 5.49899406541      |
| NM_007057 | ZWINT    | 1494 | 1642 | 7.8209221603       |
| NM_007057 | ZWINT    | 286  | 369  | 5.49898733436      |
| NM_007057 | ZWINT    | 1171 | 1382 | 8.30634898747      |
| NM_007057 | ZWINT    | 567  | 779  | 7.08395656614      |
| NM_007057 | ZWINT    | 787  | 1038 | 9.02255602147      |
| NM_007057 | ZWINT    | 82   | 197  | 7.08395656614      |
| NM_007056 | CLASRP   | 516  | 550  | 4.91730745218      |

|              |         |      |      |               |
|--------------|---------|------|------|---------------|
| NM_001308    | CPN1    | 927  | 962  | 5.54790991023 |
| NM_001308    | CPN1    | 1155 | 1211 | 6.63204238856 |
| NM_001308    | CPN1    | 700  | 768  | 6.63204911961 |
| NM_001308    | CPN1    | 339  | 387  | 6.6318753693  |
| NM_001308    | CPN1    | 1377 | 1426 | 6.6320491194  |
| NM_198947    | FAM111B | 1886 | 1941 | 9.2836782614  |
| NM_198947    | FAM111B | 921  | 974  | 9.2836782614  |
| NM_198947    | FAM111B | 1527 | 1596 | 10.0206440915 |
| NM_198947    | FAM111B | 1695 | 1727 | 7.69469839642 |
| NM_198947    | FAM111B | 1955 | 2087 | 10.6987159966 |
| NM_198947    | FAM111B | 187  | 261  | 10.0206440839 |
| NM_198947    | FAM111B | 2124 | 2220 | 9.69871599659 |
| NM_198947    | FAM111B | 2357 | 2453 | 7.69870926554 |
| NM_198947    | FAM111B | 1363 | 1440 | 9.28367176626 |
| NM_198947    | FAM111B | 1185 | 1275 | 8.69871598905 |
| NM_004663    | RAB11A  | 566  | 678  | 5.43087756582 |
| NM_004663    | RAB11A  | 2961 | 2982 | 2.34673835644 |
| NM_004663    | RAB11A  | 930  | 987  | 3.43087756582 |
| NM_004663    | RAB11A  | 251  | 278  | 3.34673835644 |
| NM_004663    | RAB11A  | 739  | 863  | 4.43087756582 |
| NM_004663    | RAB11A  | 73   | 201  | 5.01584006654 |
| NM_004663    | RAB11A  | 511  | 565  | 3.4308773299  |
| NM_004663    | RAB11A  | 311  | 509  | 5.43087756582 |
| NM_001193509 | TTC27   | 1769 | 1830 | 6.84763409117 |
| NM_001193508 | REST    | 379  | 485  | 7.51900238413 |
| NM_001193508 | REST    | 309  | 368  | 5.93386613309 |
| NM_001193508 | REST    | 2405 | 2465 | 5.93002228323 |
| NM_001193508 | REST    | 3544 | 3606 | 6.93403315235 |
| NM_001193508 | REST    | 4341 | 4412 | 6.93002228323 |
| NM_001193508 | REST    | 1027 | 1092 | 6.93002228323 |
| NM_001193508 | REST    | 6382 | 6468 | 5.93403315235 |
| NM_006122    | MAN2A2  | 1635 | 1725 | 9.80942475805 |
| NM_006122    | MAN2A2  | 2738 | 2784 | 8.22044465715 |
| NM_006122    | MAN2A2  | 998  | 1057 | 9.22446225732 |
| NM_006122    | MAN2A2  | 858  | 904  | 9.14032304794 |
| NM_006122    | MAN2A2  | 154  | 202  | 9.80942475782 |
| NM_006122    | MAN2A2  | 3480 | 3635 | 11.0318171794 |
| NM_006122    | MAN2A2  | 3121 | 3195 | 11.0318171794 |
| NM_006122    | MAN2A2  | 329  | 374  | 8.14032304794 |
| NM_006122    | MAN2A2  | 4458 | 4530 | 9.22446202141 |
| NM_006122    | MAN2A2  | 2267 | 2329 | 9.80942475804 |
| NM_006122    | MAN2A2  | 1333 | 1374 | 9.14032304794 |
| NM_006122    | MAN2A2  | 59   | 98   | 9.22044465715 |
| NM_006122    | MAN2A2  | 4088 | 4185 | 8.22446225732 |
| NM_006122    | MAN2A2  | 208  | 260  | 9.80942475805 |
| NM_006122    | MAN2A2  | 646  | 712  | 8.22044465715 |
| NM_006122    | MAN2A2  | 1394 | 1434 | 8.22446224977 |
| NM_006122    | MAN2A2  | 473  | 531  | 8.14032304794 |
| NM_006122    | MAN2A2  | 541  | 590  | 8.22446224977 |
| NM_006122    | MAN2A2  | 1477 | 1538 | 8.22428850701 |

|           |        |      |      |               |
|-----------|--------|------|------|---------------|
| NM_006122 | MAN2A2 | 1806 | 1929 | 9.80942475804 |
| NM_006122 | MAN2A2 | 3240 | 3336 | 8.22446225732 |
| NM_006122 | MAN2A2 | 799  | 856  | 8.14032304794 |
| NM_006122 | MAN2A2 | 4221 | 4299 | 9.80942475805 |
| NM_006122 | MAN2A2 | 3896 | 3965 | 9.80942475782 |
| NM_003403 | YY1    | 824  | 871  | 5.60988342863 |
| NM_003403 | YY1    | 1169 | 1235 | 6.93181152374 |
| NM_003403 | YY1    | 2293 | 2382 | 6.93181152374 |
| NM_003403 | YY1    | 1634 | 1688 | 6.52574421947 |
| NM_003403 | YY1    | 2137 | 2227 | 7.41723835091 |
| NM_003403 | YY1    | 2470 | 2537 | 5.60988342886 |
| NM_003403 | YY1    | 2024 | 2060 | 4.60970967854 |
| NM_003403 | YY1    | 1917 | 1967 | 6.60970967854 |
| NM_003403 | YY1    | 897  | 931  | 4.52574421947 |
| NM_003403 | YY1    | 725  | 766  | 4.60970967854 |
| NM_003403 | YY1    | 1506 | 1608 | 7.19484592958 |
| NM_003403 | YY1    | 1338 | 1486 | 6.93181152374 |
| NM_003403 | YY1    | 492  | 554  | 6.11070672019 |
| NM_139015 | SPPL3  | 1425 | 1485 | 10.6880669002 |
| NM_139015 | SPPL3  | 678  | 735  | 11.0099952308 |
| NM_139015 | SPPL3  | 1900 | 1997 | 9.68806713615 |
| NM_139015 | SPPL3  | 1743 | 1854 | 10.6880671362 |
| NM_139015 | SPPL3  | 1559 | 1607 | 8.68806690023 |
| NM_139015 | SPPL3  | 534  | 579  | 10.9258560217 |
| NM_139015 | SPPL3  | 843  | 987  | 11.009995231  |
| NM_139015 | SPPL3  | 1006 | 1086 | 9.68806713615 |
| NM_006693 | CPSF4  | 1722 | 1816 | 5.92753425617 |
| NM_006694 | JTB    | 1173 | 1283 | 6.66602444255 |
| NM_006694 | JTB    | 1037 | 1155 | 7.40299003672 |
| NM_006694 | JTB    | 855  | 984  | 6.88841686389 |
| NM_006694 | JTB    | 522  | 711  | 8.40299003672 |
| NM_006694 | JTB    | 765  | 846  | 6.40299003672 |
| NM_006696 | BRD8   | 1700 | 1745 | 4.32674610559 |
| NM_006696 | BRD8   | 2482 | 2544 | 6.33058995544 |
| NM_006696 | BRD8   | 2045 | 2127 | 5.32674610559 |
| NM_006696 | BRD8   | 1870 | 1938 | 4.32674610559 |
| NM_006696 | BRD8   | 1375 | 1433 | 4.32674610559 |
| NM_006696 | BRD8   | 1454 | 1570 | 5.91572620648 |
| NM_003405 | YWHAH  | 299  | 416  | 8.16321410553 |
| NM_003405 | YWHAH  | 1579 | 1690 | 7.52578418491 |
| NM_003405 | YWHAH  | 1049 | 1130 | 7.16321410553 |
| NM_003405 | YWHAH  | 921  | 1002 | 5.35585918347 |
| NM_003405 | YWHAH  | 424  | 581  | 7.8152908021  |
| NM_003405 | YWHAH  | 738  | 920  | 8.52578418491 |
| NM_003405 | YWHAH  | 584  | 730  | 7.16321410553 |
| NM_003405 | YWHAH  | 1421 | 1552 | 7.16321410553 |
| NM_003405 | YWHAH  | 1130 | 1356 | 8.35585918347 |
| NM_006698 | BLCAP  | 1430 | 1499 | 9.65409429035 |
| NM_006699 | MAN1A2 | 2508 | 2559 | 6.85137352169 |
| NM_006699 | MAN1A2 | 798  | 842  | 6.26239342102 |

|              |         |      |      |               |
|--------------|---------|------|------|---------------|
| NM_006699    | MAN1A2  | 1798 | 1851 | 6.26623727087 |
| NM_006699    | MAN1A2  | 712  | 770  | 5.26239342102 |
| NM_006699    | MAN1A2  | 484  | 551  | 6.84735592174 |
| NM_006699    | MAN1A2  | 2729 | 2813 | 5.26623727087 |
| NM_006699    | MAN1A2  | 918  | 993  | 5.26623727087 |
| NM_006699    | MAN1A2  | 5135 | 5194 | 5.26623727087 |
| NM_006699    | MAN1A2  | 1667 | 1753 | 6.26641078527 |
| NM_006699    | MAN1A2  | 2822 | 2913 | 6.26641102097 |
| NM_003409    | ZFP161  | 805  | 882  | 7.46484702858 |
| NM_020445    | ACTR3B  | 578  | 619  | 9.30758628555 |
| NM_020445    | ACTR3B  | 815  | 876  | 9.30374243569 |
| NM_004664    | LIN7A   | 413  | 455  | 5.30577149847 |
| NM_001015882 | DNAJC25 | 507  | 567  | 7.47947344359 |
| NM_001015882 | DNAJC25 | 1097 | 1170 | 5.47947344359 |
| NM_001017392 | SUGP2   | 2632 | 2685 | 7.20606540506 |
| NM_001017392 | SUGP2   | 1431 | 1481 | 7.87114951499 |
| NM_001017392 | SUGP2   | 1976 | 2041 | 7.29020460689 |
| NM_001017392 | SUGP2   | 1181 | 1244 | 8.61213270933 |
| NM_001017392 | SUGP2   | 3958 | 3999 | 7.87516687924 |
| NM_001017392 | SUGP2   | 337  | 418  | 7.87516687924 |
| NM_001017392 | SUGP2   | 227  | 286  | 6.29003086412 |
| NM_001017392 | SUGP2   | 525  | 582  | 7.29003086412 |
| NM_001017392 | SUGP2   | 2074 | 2150 | 7.29003086412 |
| NM_001017392 | SUGP2   | 4366 | 4440 | 7.29020461444 |
| NM_001017392 | SUGP2   | 2338 | 2396 | 6.29020461443 |
| NM_001017392 | SUGP2   | 3782 | 3859 | 6.28618701427 |
| NM_001017392 | SUGP2   | 1049 | 1099 | 7.29020437852 |
| NM_001017392 | SUGP2   | 458  | 524  | 8.61213270933 |
| NM_001017392 | SUGP2   | 1689 | 1771 | 6.29020461444 |
| NM_001017392 | SUGP2   | 614  | 761  | 9.0975595365  |
| NM_001017392 | SUGP2   | 2765 | 2850 | 6.29020460689 |
| NM_001017392 | SUGP2   | 2402 | 2609 | 8.61213270933 |
| NM_001017392 | SUGP2   | 4258 | 4364 | 6.29020461444 |
| NM_001017392 | SUGP2   | 1511 | 1689 | 8.61213270933 |
| NM_139279    | MCFD2   | 3620 | 3672 | 3.71705491507 |
| NM_139279    | MCFD2   | 703  | 778  | 3.71704818402 |
| NM_139279    | MCFD2   | 796  | 858  | 3.71688116475 |
| NM_139279    | MCFD2   | 2872 | 2927 | 3.1320856833  |
| NM_139279    | MCFD2   | 1395 | 1431 | 3.71705467915 |
| NM_139279    | MCFD2   | 2718 | 2762 | 2.04795320497 |
| NM_139279    | MCFD2   | 3966 | 4011 | 2.12807481418 |
| NM_139279    | MCFD2   | 3481 | 3587 | 3.13209241435 |
| NM_139279    | MCFD2   | 1912 | 1964 | 3.13209241434 |
| NM_139279    | MCFD2   | 2284 | 2325 | 2.12807481418 |
| NM_139279    | MCFD2   | 2537 | 2637 | 4.71705491507 |
| NM_139279    | MCFD2   | 3882 | 3954 | 3.13209241434 |
| NM_139279    | MCFD2   | 393  | 479  | 3.13209241435 |
| NM_139279    | MCFD2   | 1674 | 1747 | 4.71705491485 |
| NM_139279    | MCFD2   | 4073 | 4155 | 3.13209241435 |
| NM_139279    | MCFD2   | 488  | 662  | 5.45402050924 |

|              |         |       |       |               |
|--------------|---------|-------|-------|---------------|
| NM_139279    | MCFD2   | 143   | 217   | 3.13209241435 |
| NM_025225    | PNPLA3  | 792   | 839   | 7.63067364687 |
| NM_006347    | PPIH    | 478   | 524   | 6.75252654671 |
| NM_006347    | PPIH    | 633   | 706   | 8.8366657561  |
| NM_006345    | SLC30A9 | 1068  | 1126  | 6.55468758463 |
| NM_006345    | SLC30A9 | 1807  | 1870  | 6.5546810895  |
| NM_006345    | SLC30A9 | 2370  | 2410  | 5.96570771966 |
| NM_006345    | SLC30A9 | 816   | 879   | 4.96971858878 |
| NM_006345    | SLC30A9 | 1186  | 1362  | 7.77708024189 |
| NM_006345    | SLC30A9 | 1401  | 1479  | 4.96972508391 |
| NM_006345    | SLC30A9 | 226   | 283   | 4.88558611045 |
| NM_006342    | TACC3   | 1019  | 1066  | 7.73053572221 |
| NM_006342    | TACC3   | 1732  | 1828  | 8.95694574372 |
| NM_006342    | TACC3   | 1158  | 1198  | 7.73455332238 |
| NM_006342    | TACC3   | 2262  | 2332  | 7.73455332238 |
| NM_006342    | TACC3   | 59    | 113   | 7.14959058574 |
| NM_006342    | TACC3   | 1579  | 1667  | 6.14959082166 |
| NM_006342    | TACC3   | 1200  | 1247  | 6.14941707135 |
| NM_006342    | TACC3   | 274   | 355   | 7.14959082166 |
| NM_006342    | TACC3   | 2333  | 2432  | 8.14959082166 |
| NM_006342    | TACC3   | 1092  | 1154  | 7.14557322149 |
| NM_006342    | TACC3   | 235   | 274   | 7.14941707135 |
| NM_006342    | TACC3   | 382   | 528   | 9.14959082166 |
| NM_006342    | TACC3   | 1901  | 1999  | 8.95694574372 |
| NM_006342    | TACC3   | 1295  | 1417  | 8.73455332238 |
| NM_006342    | TACC3   | 2032  | 2240  | 8.14959082166 |
| NM_006342    | TACC3   | 2555  | 2818  | 10.2370536629 |
| NM_006342    | TACC3   | 624   | 713   | 7.73455332238 |
| NM_006342    | TACC3   | 720   | 826   | 7.14959082166 |
| NM_006343    | MERTK   | 2067  | 2125  | 5.9761940858  |
| NM_006343    | MERTK   | 1250  | 1327  | 6.56115658652 |
| NM_006341    | MAD2L2  | 561   | 611   | 7.05365617421 |
| NM_006341    | MAD2L2  | 184   | 288   | 9.05366290527 |
| NM_006349    | ZNHIT1  | 1064  | 1126  | 5.58353696095 |
| NM_006349    | ZNHIT1  | 643   | 711   | 6.90547178689 |
| NM_006349    | ZNHIT1  | 749   | 789   | 4.57952609183 |
| NM_006349    | ZNHIT1  | 837   | 990   | 8.16850619273 |
| NM_001113239 | HIPK2   | 4601  | 4663  | 5.78049647922 |
| NM_001113239 | HIPK2   | 7179  | 7292  | 6.78451384347 |
| NM_001113239 | HIPK2   | 5862  | 5902  | 7.36946984906 |
| NM_001113239 | HIPK2   | 6898  | 6944  | 6.78049647922 |
| NM_001113239 | HIPK2   | 10997 | 11063 | 5.78451407184 |
| NM_001113239 | HIPK2   | 6674  | 6740  | 7.36545897994 |
| NM_001113239 | HIPK2   | 14762 | 14826 | 6.78450734834 |
| NM_001113239 | HIPK2   | 8851  | 8907  | 6.78049647922 |
| NM_001113239 | HIPK2   | 9265  | 9303  | 6.78049647922 |
| NM_001113239 | HIPK2   | 11325 | 11373 | 5.78450734834 |
| NM_001113239 | HIPK2   | 14499 | 14596 | 7.78451407184 |
| NM_001113239 | HIPK2   | 13147 | 13212 | 5.70037487001 |
| NM_001113239 | HIPK2   | 1518  | 1626  | 7.78451407939 |



|              |         |       |       |                 |
|--------------|---------|-------|-------|-----------------|
| NM_001113239 | HIPK2   | 10829 | 10904 | 6.78451407917   |
| NM_001113239 | HIPK2   | 14217 | 14305 | 7.78451407938   |
| NM_001113239 | HIPK2   | 8536  | 8678  | 7.36947658011   |
| NM_001113239 | HIPK2   | 5454  | 5562  | 7.36947658011   |
| NM_001113239 | HIPK2   | 6952  | 7010  | 5.78049647922   |
| NM_001113239 | HIPK2   | 323   | 380   | 5.78049647922   |
| NM_001145796 | SH2B1   | 2220  | 2283  | 9.0474189007    |
| NM_001145796 | SH2B1   | 1245  | 1304  | 8.46245617161   |
| NM_001145796 | SH2B1   | 357   | 408   | 7.46245639998   |
| NM_001145796 | SH2B1   | 915   | 986   | 9.04741217719   |
| NM_001145796 | SH2B1   | 1153  | 1240  | 7.46245617161   |
| NM_001145796 | SH2B1   | 195   | 254   | 7.46244967647   |
| NM_001145796 | SH2B1   | 1650  | 1684  | 8.46228265721   |
| NM_001145796 | SH2B1   | 1415  | 1478  | 7.46228265721   |
| NM_058182    | FAM165B | 148   | 236   | 6.30808863325   |
| NM_058182    | FAM165B | 360   | 482   | 6.31209950237   |
| NM_198317    | KLHL17  | 2104  | 2145  | 9.51431475579   |
| NM_005808    | CTDSPL  | 276   | 334   | 8.10566382197   |
| NM_005809    | PRDX2   | 603   | 656   | 6.3037583307    |
| NM_005809    | PRDX2   | 765   | 829   | 5.81815775321   |
| NM_005809    | PRDX2   | 470   | 539   | 5.49640340864   |
| NM_005809    | PRDX2   | 106   | 230   | 6.49640340864   |
| NM_005809    | PRDX2   | 673   | 753   | 5.49639667759   |
| NM_005809    | PRDX2   | 236   | 423   | 7.58386624989   |
| NM_014176    | UBE2T   | 357   | 414   | 8.20815376295   |
| NM_014176    | UBE2T   | 749   | 804   | 7.88622566052   |
| NM_014176    | UBE2T   | 64    | 122   | 5.88220806789   |
| NM_014176    | UBE2T   | 618   | 670   | 6.88621893701   |
| NM_014176    | UBE2T   | 204   | 257   | 7.46717056861   |
| NM_014176    | UBE2T   | 429   | 531   | 6.88622566806   |
| NM_005801    | EIF1    | 721   | 799   | -0.659453810107 |
| NM_005801    | EIF1    | 845   | 900   | 0.336535320774  |
| NM_005801    | EIF1    | 1139  | 1198  | 1.34055292095   |
| NM_005801    | EIF1    | 593   | 693   | 2.92551542167   |
| NM_005801    | EIF1    | 926   | 967   | -0.659620829371 |
| NM_005801    | EIF1    | 1021  | 1067  | -0.659620829371 |
| NM_005801    | EIF1    | 132   | 582   | 5.17344293511   |
| NM_005803    | FLOT1   | 1296  | 1375  | 3.31281659987   |
| NM_005803    | FLOT1   | 230   | 268   | 2.3087989997    |
| NM_005803    | FLOT1   | 1465  | 1541  | 3.89777910059   |
| NM_005803    | FLOT1   | 141   | 180   | 3.89777886467   |
| NM_005803    | FLOT1   | 1616  | 1744  | 4.31281659987   |
| NM_005803    | FLOT1   | 486   | 735   | 6.01325631801   |
| NM_005803    | FLOT1   | 398   | 473   | 2.3087989997    |
| NM_005804    | DDX39A  | 1452  | 1509  | 8.64980359524   |
| NM_005804    | DDX39A  | 377   | 443   | 6.3278687693    |
| NM_005804    | DDX39A  | 209   | 346   | 10.0283152185   |
| NM_005804    | DDX39A  | 1117  | 1228  | 9.32787550035   |
| NM_005804    | DDX39A  | 844   | 1026  | 10.4153383416   |
| NM_005804    | DDX39A  | 62    | 185   | 9.32787550035   |

|           |          |      |      |               |               |
|-----------|----------|------|------|---------------|---------------|
| NM_005804 | DDX39A   | 443  | 757  | 11.234766096  |               |
| NM_005804 | DDX39A   | 1263 | 1438 | 9.91283800108 |               |
| NM_005805 | PSMD14   | 741  | 798  | 3.31643069087 |               |
| NM_005805 | PSMD14   | 390  | 432  | 1.31625694055 |               |
| NM_005805 | PSMD14   | 1367 | 1394 | 2.3124130907  |               |
| NM_005805 | PSMD14   | 529  | 693  | 4.90139319159 |               |
| NM_005805 | PSMD14   | 1432 | 1527 | 3.63835878576 |               |
| NM_005805 | PSMD14   | 800  | 933  | 4.48635569231 |               |
| NM_005805 | PSMD14   | 435  | 520  | 3.31643069087 |               |
| NM_005805 | PSMD14   | 935  | 1186 | 5.56435820431 |               |
| NM_005805 | PSMD14   | 1198 | 1345 | 3.31643069087 |               |
| NM_005807 | PRG4     | 2637 | 2698 | 13.556440476  |               |
| NM_005807 | PRG4     | 4044 | 4085 | 13.556440476  |               |
| NM_005807 | PRG4     | 48   | 104  | 13.5525966261 |               |
| NM_005807 | PRG4     | 3087 | 3127 | 13.4724750169 |               |
| NM_005807 | PRG4     | 3860 | 4028 | 13.5566142263 |               |
| NM_005807 | PRG4     | 3741 | 3859 | 15.141576727  |               |
| NM_005807 | PRG4     | 703  | 778  | 13.5566074953 |               |
| NM_005807 | PRG4     | 3629 | 3722 | 14.5566142263 |               |
| NM_015221 | DNMBP    | 2555 | 2644 | 9.33186141124 |               |
| NM_018303 | EXOC2    | 1976 | 2026 | 7.12070867135 |               |
| NM_018303 | EXOC2    | 458  | 490  | 7.70567117207 |               |
| NM_018303 | EXOC2    | 2471 | 2567 | 6.1247260356  |               |
| NM_018303 | EXOC2    | 1781 | 1880 | 8.12472627152 |               |
| NM_018303 | EXOC2    | 3324 | 3416 | 6.12472627152 |               |
| NM_018304 | PRR11    | 1255 | 1320 | 5.1688596564  |               |
| NM_018304 | PRR11    | 768  | 827  | 5.16868590631 |               |
| NM_018304 | PRR11    | 4906 | 4998 | 5.16885292557 |               |
| NM_018307 | RHOT1    | 1608 | 1690 | 5.49923830288 |               |
| NM_018307 | RHOT1    | 536  | 646  | 7.08821167272 |               |
| NM_015226 | CLEC16A  | 3763 | 3809 | 8.25514429787 |               |
| NM_015226 | CLEC16A  | 551  | 612  | 8.84010679859 |               |
| NM_015226 | CLEC16A  | 640  | 722  | 8.84395064845 |               |
| NM_015226 | CLEC16A  | 4014 | 4067 | 8.17502268866 |               |
| NM_015226 | CLEC16A  | 1206 | 1267 | 8.84412439855 |               |
| NM_015226 | CLEC16A  | 2287 | 2359 | 8.2591618905  |               |
| NM_015226 | CLEC16A  | 3565 | 3623 | 8.17502268866 |               |
| NM_015226 | CLEC16A  | 1687 | 1759 | 9.25916189805 |               |
| NM_015226 | CLEC16A  | 865  | 994  | 8.84412439877 |               |
| NM_015226 | CLEC16A  | 1967 | 2129 | 9.25916189805 |               |
| NM_015226 | CLEC16A  | 480  | 536  | 7.25898814773 |               |
| NM_015229 | KIAA0664 |      | 3773 | 3848          | 7.39489014828 |
| NM_015229 | KIAA0664 |      | 1793 | 1843          | 6.39471639796 |
| NM_015229 | KIAA0664 |      | 4945 | 5024          | 6.39489014828 |
| NM_015229 | KIAA0664 |      | 1564 | 1635          | 6.39471639796 |
| NM_015229 | KIAA0664 |      | 1458 | 1510          | 5.39489014073 |
| NM_015229 | KIAA0664 |      | 828  | 915           | 6.97985264878 |
| NM_015229 | KIAA0664 |      | 2606 | 2662          | 5.39489014828 |
| NM_015229 | KIAA0664 |      | 1080 | 1221          | 7.39489014828 |
| NM_015229 | KIAA0664 |      | 4855 | 4905          | 6.97967889868 |

|              |              |      |               |               |
|--------------|--------------|------|---------------|---------------|
| NM_015229    | KIAA0664     | 192  | 249           | 6.39488991236 |
| NM_015229    | KIAA0664     | 602  | 640           | 5.39488341722 |
| NM_015229    | KIAA0664     | 3209 | 3251          | 6.31075093889 |
| NM_015229    | KIAA0664     | 315  | 437           | 6.979852649   |
| NM_015229    | KIAA0664     | 3608 | 3661          | 6.39489014828 |
| NM_015229    | KIAA0664     | 455  | 591           | 8.20224507033 |
| NM_015229    | KIAA0664     | 4735 | 4785          | 6.31075093889 |
| NM_015229    | KIAA0664     | 3378 | 3489          | 6.39489014828 |
| NM_015229    | KIAA0664     | 695  | 807           | 6.39489014828 |
| NM_015229    | KIAA0664     | 1652 | 1781          | 7.71681824316 |
| NM_015229    | KIAA0664     | 4304 | 4403          | 7.71681824316 |
| NM_015229    | KIAA0664     | 2499 | 2601          | 7.71681824316 |
| NM_015229    | KIAA0664     | 1881 | 1963          | 5.39489014073 |
| NM_015229    | KIAA0664     | 2277 | 2401          | 6.39489014828 |
| NM_015229    | KIAA0664     | 4405 | 4497          | 6.979852649   |
| NM_015229    | KIAA0664     | 2669 | 2880          | 8.71681824316 |
| NM_018656    | SLC35E3 1531 | 1597 | 7.84919627369 |               |
| NM_018656    | SLC35E3 755  | 829  | 10.1712981189 |               |
| NM_018656    | SLC35E3 468  | 531  | 10.6567249461 |               |
| NM_018656    | SLC35E3 2075 | 2120 | 7.84535242383 |               |
| NM_018656    | SLC35E3 1852 | 1881 | 7.84535242383 |               |
| NM_018656    | SLC35E3 1467 | 1510 | 9.43031492456 |               |
| NM_018656    | SLC35E3 88   | 146  | 8.84535242383 |               |
| NM_018656    | SLC35E3 849  | 1022 | 10.4343325247 |               |
| NM_018656    | SLC35E3 260  | 392  | 11.0192950254 |               |
| NM_018656    | SLC35E3 2148 | 2235 | 8.84937002378 |               |
| NM_018653    | GPRC5C 1644  | 1738 | 5.25248744584 |               |
| NM_018653    | GPRC5C 202   | 265  | 5.25248743829 |               |
| NM_018653    | GPRC5C 99    | 160  | 5.25248744562 |               |
| NM_018653    | GPRC5C 365   | 419  | 5.83744994657 |               |
| NM_018653    | GPRC5C 543   | 584  | 3.25248744584 |               |
| NM_018653    | GPRC5C 1370  | 1445 | 3.25231369553 |               |
| NM_018653    | GPRC5C 710   | 777  | 4.25248744584 |               |
| NM_018653    | GPRC5C 598   | 643  | 4.25248743829 |               |
| NM_018653    | GPRC5C 849   | 917  | 4.24846984567 |               |
| NM_018653    | GPRC5C 420   | 543  | 6.83744994657 |               |
| NM_002468    | MYD88 1108   | 1164 | 5.18534312395 |               |
| NM_002468    | MYD88 1032   | 1092 | 6.18534312395 |               |
| NM_002461    | MVD 1288     | 1317 | 6.04801175472 |               |
| NM_002461    | MVD 927      | 969  | 7.13197721378 |               |
| NM_002461    | MVD 82       | 214  | 8.93950588616 |               |
| NM_001166007 | EPB41 4998   | 5064 | 6.26357547116 |               |
| NM_001166007 | EPB41 2203   | 2240 | 6.2597316213  |               |
| NM_001166007 | EPB41 1870   | 1928 | 5.26374921392 |               |
| NM_001166007 | EPB41 1612   | 1694 | 7.26374922147 |               |
| NM_001166007 | EPB41 1522   | 1570 | 5.17961001209 |               |
| NM_001166007 | EPB41 1098   | 1167 | 5.26374921392 |               |
| NM_001166007 | EPB41 3205   | 3287 | 7.26374922147 |               |
| NM_001166007 | EPB41 4806   | 4868 | 7.58567708044 |               |
| NM_001166007 | EPB41 5577   | 5650 | 6.26374922147 |               |

|              |       |      |      |               |
|--------------|-------|------|------|---------------|
| NM_001166007 | EPB41 | 2010 | 2064 | 5.26374249042 |
| NM_001166007 | EPB41 | 1415 | 1510 | 6.26374922147 |
| NM_001166007 | EPB41 | 2338 | 2438 | 5.26374922147 |
| NM_002467    | MYC   | 2000 | 2072 | 4.15448026101 |
| NM_002467    | MYC   | 2084 | 2170 | 3.15046289676 |
| NM_002467    | MYC   | 1213 | 1254 | 5.15430674661 |
| NM_002467    | MYC   | 1141 | 1178 | 4.07034128755 |
| NM_002467    | MYC   | 1545 | 1581 | 3.07034128755 |
| NM_002467    | MYC   | 371  | 432  | 4.73944276173 |
| NM_002467    | MYC   | 1305 | 1389 | 4.73944299765 |
| NM_002467    | MYC   | 1814 | 1898 | 5.73944299765 |
| NM_002467    | MYC   | 462  | 580  | 4.15448049693 |
| NM_002467    | MYC   | 580  | 678  | 5.15448049693 |
| NM_002466    | MYBL2 | 1168 | 1293 | 8.29964546156 |
| NM_002466    | MYBL2 | 2302 | 2389 | 5.1295467098  |
| NM_002466    | MYBL2 | 2002 | 2141 | 8.71468296084 |
| NM_002466    | MYBL2 | 2584 | 2672 | 6.12972046011 |
| NM_002466    | MYBL2 | 981  | 1082 | 5.12972046012 |
| NM_002466    | MYBL2 | 748  | 905  | 7.451648555   |
| NM_002466    | MYBL2 | 1769 | 1951 | 6.12972046012 |
| NM_002466    | MYBL2 | 1506 | 1708 | 8.58915207875 |
| NM_002466    | MYBL2 | 264  | 456  | 8.58915207875 |
| NM_002466    | MYBL2 | 474  | 641  | 7.451648555   |
| NM_031965    | GSG2  | 207  | 242  | 10.5156417988 |
| NM_031965    | GSG2  | 1788 | 1870 | 10.5156417988 |
| NM_031966    | CCNB1 | 891  | 996  | 7.75950684776 |
| NM_031966    | CCNB1 | 118  | 249  | 7.27408002059 |
| NM_031966    | CCNB1 | 1970 | 2022 | 3.86801271632 |
| NM_031966    | CCNB1 | 251  | 425  | 7.27408002059 |
| NM_031966    | CCNB1 | 1020 | 1591 | 10.0814349426 |
| NM_031966    | CCNB1 | 543  | 883  | 8.47571388176 |
| NM_031968    | NARF  | 532  | 595  | 6.10826932505 |
| NM_031968    | NARF  | 733  | 796  | 6.69323854928 |
| NM_031968    | NARF  | 406  | 458  | 6.69323855683 |
| NM_031968    | NARF  | 1158 | 1214 | 6.10826932505 |
| NM_031968    | NARF  | 1421 | 1484 | 5.10827605611 |
| NM_031968    | NARF  | 153  | 191  | 5.10425845594 |
| NM_031968    | NARF  | 1323 | 1374 | 5.10425845594 |
| NM_031968    | NARF  | 458  | 528  | 6.69323182578 |
| NM_031968    | NARF  | 1064 | 1145 | 8.10827605611 |
| NM_031968    | NARF  | 282  | 399  | 7.91563097817 |
| NM_001122633 | CPS1  | 2345 | 2394 | 6.02928695919 |
| NM_001122633 | CPS1  | 3620 | 3656 | 7.11341943752 |
| NM_001122633 | CPS1  | 1860 | 1932 | 6.10940856841 |
| NM_001122633 | CPS1  | 2239 | 2289 | 7.02928695919 |
| NM_001122633 | CPS1  | 3005 | 3082 | 7.11341943752 |
| NM_001122633 | CPS1  | 399  | 446  | 7.69821491898 |
| NM_001122633 | CPS1  | 3785 | 3913 | 7.69838866175 |
| NM_001122633 | CPS1  | 3146 | 3225 | 7.11342616103 |
| NM_001122633 | CPS1  | 4899 | 4966 | 7.11341943752 |

|           |         |      |      |               |
|-----------|---------|------|------|---------------|
| NM_033529 | CDK11A  | 89   | 190  | 7.51176215721 |
| NM_033529 | CDK11A  | 2106 | 2222 | 5.92679965649 |
| NM_033529 | CDK11A  | 1320 | 1442 | 7.92679965649 |
| NM_033529 | CDK11A  | 2424 | 2597 | 8.24872775138 |
| NM_033529 | CDK11A  | 1685 | 1745 | 5.92679964894 |
| NM_033529 | CDK11A  | 1533 | 1643 | 8.24872775138 |
| NM_033529 | CDK11A  | 1887 | 1953 | 5.92679964894 |
| NM_014798 | PLEKHM1 | 2688 | 2742 | 9.39101924282 |
| NM_014791 | MELK    | 352  | 408  | 7.75742388409 |
| NM_014791 | MELK    | 661  | 718  | 7.75743061514 |
| NM_014791 | MELK    | 1167 | 1218 | 6.67329140576 |
| NM_014791 | MELK    | 615  | 660  | 8.75743061514 |
| NM_014791 | MELK    | 2158 | 2225 | 9.07935871003 |
| NM_014791 | MELK    | 856  | 911  | 9.07935870981 |
| NM_014791 | MELK    | 1522 | 1622 | 6.75743061514 |
| NM_014791 | MELK    | 1815 | 1858 | 6.75743061492 |
| NM_014791 | MELK    | 1032 | 1077 | 7.75725686483 |
| NM_014791 | MELK    | 1238 | 1273 | 7.67329140576 |
| NM_014791 | MELK    | 566  | 613  | 7.75341301497 |
| NM_014791 | MELK    | 1437 | 1496 | 7.75743037923 |
| NM_014791 | MELK    | 1293 | 1415 | 10.2168622338 |
| NM_014791 | MELK    | 170  | 247  | 8.34239311586 |
| NM_014791 | MELK    | 83   | 138  | 6.75341301497 |
| NM_014791 | MELK    | 733  | 838  | 9.07935871003 |
| NM_014791 | MELK    | 2371 | 2462 | 6.75725686483 |
| NM_014791 | MELK    | 2304 | 2364 | 6.75725686483 |
| NM_014791 | MELK    | 426  | 544  | 9.75743061514 |
| NM_022121 | PERP    | 941  | 981  | 7.14344489331 |
| NM_022121 | PERP    | 309  | 868  | 11.8849121156 |
| NM_022121 | PERP    | 1090 | 1207 | 8.46537322412 |
| NM_022121 | PERP    | 1451 | 1644 | 10.3913726427 |
| NM_022121 | PERP    | 1398 | 1440 | 5.13942752906 |
| NM_022121 | PERP    | 1649 | 1791 | 8.84388484737 |
| NM_022121 | PERP    | 1037 | 1088 | 5.14344512901 |
| NM_022121 | PERP    | 887  | 941  | 5.14344512923 |
| NM_022121 | PERP    | 1310 | 1397 | 6.14344512901 |
| NM_022121 | PERP    | 1798 | 1922 | 8.31337013067 |
| NM_022121 | PERP    | 102  | 290  | 8.95080005129 |
| NM_145112 | MAX     | 1077 | 1132 | 6.84618565393 |
| NM_145112 | MAX     | 1862 | 1904 | 8.51511361371 |
| NM_005119 | THRAP3  | 3964 | 4066 | 4.63683116174 |
| NM_005119 | THRAP3  | 2053 | 2109 | 6.63683116174 |
| NM_005119 | THRAP3  | 2435 | 2528 | 4.63683116174 |
| NM_005119 | THRAP3  | 1338 | 1438 | 5.95875925662 |
| NM_005119 | THRAP3  | 1267 | 1324 | 3.63683116173 |
| NM_005119 | THRAP3  | 3798 | 3835 | 5.22179366245 |
| NM_005119 | THRAP3  | 121  | 187  | 5.63683116174 |
| NM_005119 | THRAP3  | 3138 | 3208 | 3.63665741142 |
| NM_005119 | THRAP3  | 638  | 752  | 6.80675616318 |
| NM_005119 | THRAP3  | 2134 | 2227 | 4.63683116174 |

|              |         |      |      |               |
|--------------|---------|------|------|---------------|
| NM_005119    | THRAP3  | 4219 | 4281 | 3.63683116174 |
| NM_005119    | THRAP3  | 231  | 376  | 6.95875925662 |
| NM_005119    | THRAP3  | 3536 | 3711 | 6.63683116174 |
| NM_005119    | THRAP3  | 3392 | 3521 | 5.95875925662 |
| NM_005119    | THRAP3  | 1924 | 2036 | 6.44418608379 |
| NM_005119    | THRAP3  | 1774 | 1798 | 4.55269195235 |
| NM_005119    | THRAP3  | 516  | 617  | 3.63683116174 |
| NM_005119    | THRAP3  | 31   | 118  | 6.22179366246 |
| NM_005119    | THRAP3  | 1458 | 1604 | 5.22179366246 |
| NM_005119    | THRAP3  | 1033 | 1138 | 3.63683116174 |
| NM_005119    | THRAP3  | 2591 | 2700 | 5.63683116174 |
| NM_005119    | THRAP3  | 821  | 930  | 5.95875925662 |
| NM_005119    | THRAP3  | 3855 | 3961 | 7.09626278037 |
| NM_005119    | THRAP3  | 2311 | 2426 | 5.95875925662 |
| NM_005119    | THRAP3  | 1200 | 1247 | 3.55269195235 |
| NM_005977    | RNF6    | 2929 | 2988 | 4.59442882466 |
| NM_005116    | SLC23A2 | 2805 | 2864 | 6.47734472284 |
| NM_005116    | SLC23A2 | 4333 | 4387 | 4.15942749707 |
| NM_005116    | SLC23A2 | 1898 | 1996 | 6.96678915019 |
| NM_005116    | SLC23A2 | 101  | 156  | 5.74037912868 |
| NM_005116    | SLC23A2 | 487  | 550  | 5.15926047781 |
| NM_005116    | SLC23A2 | 1807 | 1894 | 6.15943399221 |
| NM_014972    | TCF25   | 611  | 661  | 3.86748108155 |
| NM_014972    | TCF25   | 976  | 1026 | 3.8674878126  |
| NM_014972    | TCF25   | 55   | 93   | 3.86731406228 |
| NM_014972    | TCF25   | 1519 | 1554 | 3.86347021243 |
| NM_014972    | TCF25   | 1798 | 1882 | 5.45245031332 |
| NM_014972    | TCF25   | 256  | 345  | 6.18941590749 |
| NM_014972    | TCF25   | 1897 | 1947 | 5.44843271315 |
| NM_014972    | TCF25   | 362  | 430  | 5.8674878126  |
| NM_014972    | TCF25   | 1193 | 1366 | 6.45245031332 |
| NM_213560    | PKN1    | 726  | 758  | 4.57695103772 |
| NM_213560    | PKN1    | 2061 | 2120 | 4.57695103772 |
| NM_213560    | PKN1    | 1008 | 1083 | 6.16593113861 |
| NM_213560    | PKN1    | 609  | 681  | 6.16593113861 |
| NM_213560    | PKN1    | 171  | 219  | 6.16593090269 |
| NM_213560    | PKN1    | 1917 | 2054 | 7.16593113861 |
| NM_213560    | PKN1    | 467  | 606  | 7.16593113861 |
| NM_213560    | PKN1    | 1295 | 1514 | 8.16593113861 |
| NM_213560    | PKN1    | 2121 | 2450 | 8.90289673278 |
| NM_213560    | PKN1    | 1799 | 1903 | 6.16593113839 |
| NM_213560    | PKN1    | 2570 | 2679 | 6.90289673278 |
| NM_213560    | PKN1    | 825  | 900  | 6.16593113861 |
| NM_213560    | PKN1    | 1619 | 1774 | 6.90289673278 |
| NM_001033088 | NGRN    | 1232 | 1296 | 5.84307419848 |
| NM_001033088 | NGRN    | 356  | 411  | 3.8430741987  |
| NM_001033088 | NGRN    | 1065 | 1193 | 7.01299920014 |
| NM_001033088 | NGRN    | 549  | 659  | 3.84306746764 |
| NM_000031    | ALAD    | 2487 | 2587 | 6.71494843573 |
| NM_173473    | ANAPC16 | 242  | 342  | 7.21260715374 |

|              |         |      |      |               |
|--------------|---------|------|------|---------------|
| NM_173473    | ANAPC16 | 1001 | 1053 | 5.8906723278  |
| NM_173470    | MMGT1   | 1289 | 1318 | 8.32024366702 |
| NM_173470    | MMGT1   | 2032 | 2089 | 9.98933864607 |
| NM_173470    | MMGT1   | 575  | 606  | 9.40437614535 |
| NM_173470    | MMGT1   | 1102 | 1146 | 9.98933864607 |
| NM_173470    | MMGT1   | 1359 | 1411 | 9.40437614535 |
| NM_173470    | MMGT1   | 258  | 332  | 9.98933864607 |
| NM_173470    | MMGT1   | 1047 | 1087 | 10.4043828689 |
| NM_173470    | MMGT1   | 2306 | 2349 | 9.40437614535 |
| NM_173470    | MMGT1   | 174  | 229  | 8.40437614535 |
| NM_173470    | MMGT1   | 656  | 724  | 9.32024366702 |
| NM_173470    | MMGT1   | 2598 | 2697 | 10.4043828764 |
| NM_001002926 | TWISTNB | 332  | 403  | 8.60816011771 |
| NM_001002926 | TWISTNB | 430  | 517  | 7.02319089348 |
| NM_001002926 | TWISTNB | 3471 | 3544 | 6.93905841515 |
| NM_001002926 | TWISTNB | 1735 | 1811 | 8.02319762432 |
| NM_001967    | EIF4A2  | 1826 | 1881 | 2.63784990477 |
| NM_001967    | EIF4A2  | 790  | 918  | 5.88577741821 |
| NM_001967    | EIF4A2  | 570  | 627  | 3.95977799966 |
| NM_001967    | EIF4A2  | 1639 | 1801 | 5.44520482683 |
| NM_001967    | EIF4A2  | 1135 | 1399 | 6.80777490621 |
| NM_001967    | EIF4A2  | 927  | 1098 | 5.88577741821 |
| NM_001967    | EIF4A2  | 1406 | 1638 | 5.54474050038 |
| NM_001967    | EIF4A2  | 367  | 567  | 4.63784990477 |
| NM_001967    | EIF4A2  | 658  | 778  | 4.44520482683 |
| NM_001967    | EIF4A2  | 7    | 293  | 6.28170609454 |
| NM_004446    | EPRS    | 414  | 455  | 5.01640845119 |
| NM_004446    | EPRS    | 2903 | 2957 | 5.43546355042 |
| NM_004446    | EPRS    | 1712 | 1764 | 5.43546355042 |
| NM_004446    | EPRS    | 3955 | 4060 | 5.75739164553 |
| NM_004446    | EPRS    | 1044 | 1107 | 4.43545681959 |
| NM_004446    | EPRS    | 365  | 407  | 4.43144595047 |
| NM_004446    | EPRS    | 3389 | 3443 | 3.43546355065 |
| NM_004446    | EPRS    | 536  | 650  | 7.13590326879 |
| NM_004446    | EPRS    | 457  | 524  | 6.60538855209 |
| NM_004446    | EPRS    | 1117 | 1215 | 5.43546355065 |
| NM_004446    | EPRS    | 2812 | 2863 | 5.75739164553 |
| NM_004446    | EPRS    | 4930 | 4996 | 3.43144595047 |
| NM_004446    | EPRS    | 4365 | 4477 | 6.43546355065 |
| NM_004446    | EPRS    | 652  | 725  | 4.43546355064 |
| NM_004446    | EPRS    | 4497 | 4784 | 7.60538855209 |
| NM_004446    | EPRS    | 4063 | 4127 | 4.43528980033 |
| NM_004446    | EPRS    | 1866 | 1993 | 5.75739164553 |
| NM_004446    | EPRS    | 3672 | 3803 | 4.43546355065 |
| NM_004446    | EPRS    | 3820 | 3941 | 5.75739164553 |
| NM_004446    | EPRS    | 238  | 353  | 6.02042605137 |
| NM_004446    | EPRS    | 1767 | 1840 | 5.02042605137 |
| NM_004446    | EPRS    | 2008 | 2118 | 5.75739164553 |
| NM_004446    | EPRS    | 2125 | 2242 | 5.43546355065 |
| NM_004446    | EPRS    | 730  | 999  | 6.89489516928 |

|           |         |      |      |                |
|-----------|---------|------|------|----------------|
| NM_004446 | EPRS    | 2627 | 2781 | 5.75739164553  |
| NM_004446 | EPRS    | 1264 | 1370 | 5.02042605137  |
| NM_004446 | EPRS    | 2416 | 2627 | 6.89489516928  |
| NM_004446 | EPRS    | 2997 | 3164 | 6.60538855209  |
| NM_004446 | EPRS    | 4129 | 4357 | 6.43546355065  |
| NM_004446 | EPRS    | 3450 | 3643 | 6.02042605137  |
| NM_004446 | EPRS    | 2251 | 2354 | 6.02042605137  |
| NM_004446 | EPRS    | 1416 | 1707 | 7.5229263919   |
| NM_004444 | EPHB4   | 969  | 995  | 6.52971510144  |
| NM_004444 | EPHB4   | 3213 | 3302 | 5.61385431083  |
| NM_004444 | EPHB4   | 1607 | 1690 | 6.61385431083  |
| NM_004444 | EPHB4   | 1043 | 1149 | 9.07328592947  |
| NM_004444 | EPHB4   | 1854 | 1901 | 5.61385430328  |
| NM_004444 | EPHB4   | 1694 | 1834 | 7.19881681155  |
| NM_004444 | EPHB4   | 3995 | 4087 | 8.61385431083  |
| NM_004444 | EPHB4   | 2933 | 3064 | 8.61385431083  |
| NM_004444 | EPHB4   | 2285 | 2375 | 7.19881681155  |
| NM_004444 | EPHB4   | 3583 | 3626 | 7.19479921138  |
| NM_004444 | EPHB4   | 2112 | 2280 | 9.19881681155  |
| NM_004444 | EPHB4   | 3860 | 3935 | 6.61385431083  |
| NM_004444 | EPHB4   | 2550 | 2630 | 6.61385430328  |
| NM_004444 | EPHB4   | 2009 | 2064 | 5.61368056051  |
| NM_004444 | EPHB4   | 496  | 663  | 9.07328592947  |
| NM_004444 | EPHB4   | 3307 | 3365 | 7.1988100805   |
| NM_004444 | EPHB4   | 1360 | 1452 | 5.61385431083  |
| NM_004444 | EPHB4   | 2695 | 2878 | 9.31429402897  |
| NM_004444 | EPHB4   | 834  | 929  | 6.61385431083  |
| NM_012242 | DKK1    | 2    | 478  | 12.0854952358  |
| NM_012242 | DKK1    | 478  | 1608 | 13.8709907239  |
| NM_012243 | SLC35A3 | 503  | 552  | 9.94133643877  |
| NM_012243 | SLC35A3 | 2768 | 2833 | 7.94534730789  |
| NM_012243 | SLC35A3 | 4460 | 4511 | 8.94133643877  |
| NM_012243 | SLC35A3 | 554  | 610  | 9.86121482956  |
| NM_012243 | SLC35A3 | 648  | 723  | 8.94535403139  |
| NM_012243 | SLC35A3 | 1015 | 1142 | 10.9453540389  |
| NM_012243 | SLC35A3 | 806  | 945  | 10.752708961   |
| NM_001960 | EEF1D   | 1063 | 1127 | 2.83366038393  |
| NM_001960 | EEF1D   | 646  | 711  | 0.833660383933 |
| NM_001960 | EEF1D   | 927  | 1022 | 2.83366038393  |
| NM_001960 | EEF1D   | 1144 | 1213 | 3.64101530599  |
| NM_001960 | EEF1D   | 562  | 613  | 1.83366038371  |
| NM_001960 | EEF1D   | 776  | 872  | 2.83366038393  |
| NM_001960 | EEF1D   | 279  | 495  | 4.00358538537  |
| NM_012248 | SEPHS2  | 167  | 202  | 2.50165272282  |
| NM_012248 | SEPHS2  | 1797 | 1829 | 4.09062609266  |
| NM_012248 | SEPHS2  | 287  | 381  | 2.50567032299  |
| NM_012248 | SEPHS2  | 102  | 163  | 4.09063282371  |
| NM_012248 | SEPHS2  | 1830 | 1860 | 3.50566359193  |
| NM_012248 | SEPHS2  | 387  | 443  | 4.09063282371  |
| NM_012248 | SEPHS2  | 1192 | 1238 | 4.50567032277  |



|           |        |      |      |               |
|-----------|--------|------|------|---------------|
| NM_012248 | SEPHS2 | 1752 | 1797 | 4.82759841765 |
| NM_012248 | SEPHS2 | 2061 | 2212 | 6.4125609186  |
| NM_012248 | SEPHS2 | 642  | 761  | 6.4125609186  |
| NM_012248 | SEPHS2 | 999  | 1107 | 4.50567032299 |
| NM_012248 | SEPHS2 | 1490 | 1722 | 6.31302524505 |
| NM_012248 | SEPHS2 | 1337 | 1478 | 4.82759841788 |
| NM_012249 | RHOQ   | 481  | 538  | 5.79969944873 |
| NM_012249 | RHOQ   | 1221 | 1275 | 5.79987296313 |
| NM_012249 | RHOQ   | 696  | 840  | 5.79987319905 |
| NM_022780 | RMND5A | 2615 | 2659 | 4.57623290745 |
| NM_022780 | RMND5A | 2090 | 2115 | 3.57222203833 |
| NM_022780 | RMND5A | 1445 | 1483 | 4.49210042912 |
| NM_022780 | RMND5A | 3107 | 3148 | 3.49210042912 |
| NM_022780 | RMND5A | 499  | 611  | 5.8981677334  |
| NM_022780 | RMND5A | 624  | 677  | 5.57623963096 |
| NM_022780 | RMND5A | 925  | 997  | 5.8981677334  |
| NM_022780 | RMND5A | 3988 | 4040 | 4.49210042912 |
| NM_022780 | RMND5A | 3002 | 3058 | 3.57222203833 |
| NM_022780 | RMND5A | 1569 | 1617 | 3.57222203833 |
| NM_022780 | RMND5A | 763  | 834  | 4.57623963851 |
| NM_022780 | RMND5A | 1979 | 2078 | 3.57623940259 |
| NM_022780 | RMND5A | 425  | 484  | 3.57222203833 |
| NM_022780 | RMND5A | 4361 | 4452 | 4.57623290745 |
| NM_022786 | ARV1   | 174  | 228  | 9.6013333759  |
| NM_022786 | ARV1   | 574  | 730  | 11.1862958766 |
| NM_022786 | ARV1   | 403  | 546  | 11.408688298  |
| NM_022786 | ARV1   | 781  | 896  | 10.9232614708 |
| NM_201430 | RTN3   | 2063 | 2128 | 5.85290504546 |
| NM_201430 | RTN3   | 1529 | 1649 | 7.33833187263 |
| NM_201430 | RTN3   | 1982 | 2060 | 5.11593945129 |
| NM_201430 | RTN3   | 1872 | 1945 | 5.11593945129 |
| NM_201430 | RTN3   | 1662 | 1759 | 6.99040856921 |
| NM_201430 | RTN3   | 2383 | 2428 | 3.44683774119 |
| NM_201430 | RTN3   | 29   | 284  | 8.3889579457  |
| NM_201430 | RTN3   | 2299 | 2352 | 6.53097694302 |
| NM_201430 | RTN3   | 2195 | 2293 | 5.85290504546 |
| NM_201430 | RTN3   | 983  | 1388 | 8.48517326096 |
| NM_201430 | RTN3   | 1395 | 1529 | 6.85290504546 |
| NM_201430 | RTN3   | 284  | 982  | 10.670528303  |
| NM_000562 | C8A    | 511  | 574  | 6.96414558852 |
| NM_000562 | C8A    | 855  | 891  | 6.96012822426 |
| NM_000562 | C8A    | 736  | 795  | 6.96012822426 |
| NM_000565 | IL6R   | 842  | 886  | 7.57668548363 |
| NM_000565 | IL6R   | 2278 | 2369 | 7.49656387441 |
| NM_000565 | IL6R   | 4593 | 4639 | 7.57668548363 |
| NM_000565 | IL6R   | 4649 | 4714 | 9.1656653486  |
| NM_000565 | IL6R   | 1153 | 1241 | 7.5807030838  |
| NM_000565 | IL6R   | 1391 | 1487 | 8.58070307625 |
| NM_000565 | IL6R   | 979  | 1041 | 9.16566558451 |
| NM_014970 | KIFAP3 | 1972 | 2028 | 7.59101833908 |

|              |         |      |      |               |
|--------------|---------|------|------|---------------|
| NM_014970    | KIFAP3  | 1283 | 1365 | 6.59503570334 |
| NM_014970    | KIFAP3  | 2697 | 2763 | 7.59503593171 |
| NM_182752    | TPRG1L  | 1971 | 2017 | 5.60646040941 |
| NM_182752    | TPRG1L  | 2298 | 2359 | 5.60662742867 |
| NM_182752    | TPRG1L  | 1139 | 1209 | 6.60646040941 |
| NM_182752    | TPRG1L  | 330  | 420  | 5.6066341595  |
| NM_030954    | RNF170  | 886  | 949  | 5.01701727073 |
| NM_030954    | RNF170  | 491  | 559  | 4.93689566152 |
| NM_030952    | NUAK2   | 2537 | 2601 | 10.8975768795 |
| NM_030952    | NUAK2   | 2749 | 2810 | 10.9815423386 |
| NM_182758    | WDR72   | 5130 | 5175 | 11.4704173166 |
| NM_182758    | WDR72   | 4106 | 4148 | 11.3862783431 |
| NM_182758    | WDR72   | 2123 | 2158 | 13.0552063029 |
| NM_182758    | WDR72   | 1782 | 1892 | 11.4704175523 |
| NM_001134335 | EIF2AK1 | 223  | 281  | 4.16276660991 |
| NM_001134335 | EIF2AK1 | 2791 | 2874 | 3.57780387327 |
| NM_001134335 | EIF2AK1 | 1513 | 1578 | 4.89973220408 |
| NM_001134335 | EIF2AK1 | 2031 | 2143 | 4.57780410919 |
| NM_001134335 | EIF2AK1 | 1338 | 1394 | 4.57780410164 |
| NM_001134335 | EIF2AK1 | 1240 | 1337 | 4.89973220408 |
| NM_001134335 | EIF2AK1 | 2196 | 2435 | 6.82573162264 |
| NM_001134335 | EIF2AK1 | 688  | 730  | 3.57779737814 |
| NM_001134335 | EIF2AK1 | 1396 | 1506 | 6.27824382733 |
| NM_001134335 | EIF2AK1 | 337  | 517  | 6.27824382733 |
| NM_001134335 | EIF2AK1 | 522  | 676  | 5.57780410919 |
| NM_001134335 | EIF2AK1 | 2443 | 2790 | 6.82573162264 |
| NM_001134335 | EIF2AK1 | 1812 | 1894 | 3.57780410919 |
| NM_001134335 | EIF2AK1 | 1001 | 1146 | 5.57780410919 |
| NM_001134335 | EIF2AK1 | 1596 | 1800 | 5.74772911063 |
| NM_001618    | PARP1   | 355  | 409  | 5.81126785818 |
| NM_001618    | PARP1   | 3215 | 3292 | 5.81126786573 |
| NM_001618    | PARP1   | 540  | 587  | 5.22613161469 |
| NM_001618    | PARP1   | 2955 | 3016 | 5.22629863396 |
| NM_001618    | PARP1   | 2836 | 2889 | 6.22630536501 |
| NM_001618    | PARP1   | 461  | 509  | 5.22630535746 |
| NM_001618    | PARP1   | 2733 | 2780 | 5.81126113468 |
| NM_001618    | PARP1   | 2514 | 2570 | 5.22630536501 |
| NM_001618    | PARP1   | 2574 | 2664 | 6.81126786573 |
| NM_001618    | PARP1   | 3299 | 3366 | 5.22630536479 |
| NM_001618    | PARP1   | 3028 | 3211 | 7.68573698365 |
| NM_001618    | PARP1   | 1828 | 2062 | 7.68573698365 |
| NM_001618    | PARP1   | 1176 | 1249 | 4.22630536501 |
| NM_001618    | PARP1   | 1299 | 1443 | 6.5482334599  |
| NM_001618    | PARP1   | 2307 | 2512 | 7.68573698365 |
| NM_001618    | PARP1   | 842  | 1133 | 8.39623036645 |
| NM_001618    | PARP1   | 2076 | 2152 | 5.81126786573 |
| NM_001618    | PARP1   | 2166 | 2276 | 7.03366028707 |
| NM_001618    | PARP1   | 110  | 236  | 6.22630536501 |
| NM_001618    | PARP1   | 3376 | 3496 | 6.5482334599  |
| NM_001618    | PARP1   | 1708 | 1821 | 6.81126786573 |

|           |       |      |      |               |
|-----------|-------|------|------|---------------|
| NM_001618 | PARP1 | 1464 | 1574 | 4.22630536501 |
| NM_004228 | CYTH2 | 1573 | 1636 | 5.35076439782 |
| NM_004228 | CYTH2 | 1205 | 1290 | 7.35093814814 |
| NM_004228 | CYTH2 | 3954 | 4040 | 5.35093814814 |
| NM_004228 | CYTH2 | 498  | 587  | 6.35093141709 |
| NM_004999 | MY06  | 5081 | 5141 | 7.37482638538 |
| NM_004999 | MY06  | 4917 | 4976 | 6.78986388465 |
| NM_004999 | MY06  | 2021 | 2079 | 7.290687176   |
| NM_004999 | MY06  | 1384 | 1458 | 8.11179197955 |
| NM_004999 | MY06  | 5175 | 5230 | 7.37482638538 |
| NM_004999 | MY06  | 216  | 261  | 6.78584628449 |
| NM_004999 | MY06  | 3919 | 4037 | 8.37482638538 |
| NM_004999 | MY06  | 3500 | 3584 | 8.37482638516 |
| NM_004999 | MY06  | 2485 | 2605 | 7.37482638538 |
| NM_004999 | MY06  | 3665 | 3700 | 5.70572467527 |
| NM_004999 | MY06  | 1223 | 1283 | 5.78986364874 |
| NM_004999 | MY06  | 2315 | 2407 | 7.37482638537 |
| NM_004999 | MY06  | 883  | 958  | 7.37482637783 |
| NM_004999 | MY06  | 515  | 594  | 6.78986388444 |
| NM_004999 | MY06  | 1910 | 2015 | 7.37482638538 |
| NM_004999 | MY06  | 1731 | 1869 | 7.78986388466 |
| NM_004999 | MY06  | 2408 | 2476 | 6.78986388465 |
| NM_004998 | MY01E | 422  | 489  | 7.3378394198  |
| NM_004995 | MMP14 | 3485 | 3535 | 8.28712909678 |
| NM_004995 | MMP14 | 1235 | 1316 | 9.87209159772 |
| NM_004995 | MMP14 | 2266 | 2346 | 9.287129097   |
| NM_004995 | MMP14 | 2370 | 2467 | 10.287129097  |
| NM_004995 | MMP14 | 1067 | 1118 | 8.28712909678 |
| NM_004995 | MMP14 | 1440 | 1483 | 9.87191784741 |
| NM_004995 | MMP14 | 1158 | 1232 | 9.287129097   |
| NM_004995 | MMP14 | 2619 | 2669 | 8.28695534668 |
| NM_004995 | MMP14 | 910  | 983  | 10.287129097  |
| NM_004995 | MMP14 | 305  | 356  | 8.28712236595 |
| NM_004995 | MMP14 | 1491 | 1675 | 11.6090571919 |
| NM_004995 | MMP14 | 2150 | 2192 | 8.28695534668 |
| NM_004995 | MMP14 | 1687 | 1749 | 8.28712236595 |
| NM_004995 | MMP14 | 1992 | 2095 | 8.287129097   |
| NM_001610 | ACP2  | 801  | 868  | 8.9204973469  |
| NM_001610 | ACP2  | 1045 | 1140 | 8.9204973469  |
| NM_001610 | ACP2  | 1156 | 1193 | 8.42132063824 |
| NM_001610 | ACP2  | 545  | 778  | 11.2424254418 |
| NM_001610 | ACP2  | 2019 | 2130 | 8.5054598474  |
| NM_001610 | ACP2  | 1923 | 1998 | 7.92049734689 |
| NM_001610 | ACP2  | 1734 | 1833 | 9.24242544179 |
| NM_001610 | ACP2  | 137  | 201  | 8.92049734689 |
| NM_001610 | ACP2  | 1474 | 1615 | 9.50545984762 |
| NM_001610 | ACP2  | 902  | 1040 | 9.50545984762 |
| NM_001610 | ACP2  | 242  | 315  | 7.92049733935 |
| NM_001610 | ACP2  | 1203 | 1403 | 10.2424254418 |
| NM_001610 | ACP2  | 332  | 501  | 10.2424254418 |

|              |         |      |      |               |
|--------------|---------|------|------|---------------|
| NM_001613    | ACTA2   | 348  | 370  | 6.1069829141  |
| NM_001613    | ACTA2   | 677  | 714  | 7.69194541482 |
| NM_001613    | ACTA2   | 1088 | 1128 | 6.10698292164 |
| NM_054012    | ASS1    | 1491 | 1561 | 7.02549582289 |
| NM_054012    | ASS1    | 1177 | 1248 | 7.02566933728 |
| NM_054012    | ASS1    | 308  | 417  | 9.0256695732  |
| NM_054012    | ASS1    | 1400 | 1466 | 7.61063183801 |
| NM_054012    | ASS1    | 812  | 899  | 8.0256695732  |
| NM_054012    | ASS1    | 1023 | 1122 | 8.83302449526 |
| NM_004991    | MECOM   | 4943 | 5025 | 12.6353554658 |
| NM_001614    | ACTG1   | 1689 | 1788 | 2.82370096607 |
| NM_001614    | ACTG1   | 59   | 417  | 4.82370096607 |
| NM_001614    | ACTG1   | 422  | 643  | 3.7671174377  |
| NM_001614    | ACTG1   | 1336 | 1688 | 4.95615126209 |
| NM_001614    | ACTG1   | 1788 | 1978 | 3.12326124793 |
| NM_001614    | ACTG1   | 649  | 1330 | 5.27300836743 |
| NM_004225    | MFHAS1  | 538  | 609  | 8.44909942849 |
| NM_004225    | MFHAS1  | 4095 | 4151 | 7.44909942849 |
| NM_004225    | MFHAS1  | 3711 | 3757 | 8.36513396943 |
| NM_004225    | MFHAS1  | 3644 | 3692 | 8.44909942849 |
| NM_004225    | MFHAS1  | 2388 | 2453 | 7.44525557864 |
| NM_004225    | MFHAS1  | 1579 | 1655 | 8.44927317881 |
| NM_004225    | MFHAS1  | 2916 | 3065 | 10.4492731788 |
| NM_054016    | SRSF10  | 1310 | 1367 | 4.26948770214 |
| NM_054016    | SRSF10  | 536  | 667  | 5.27350530231 |
| NM_054016    | SRSF10  | 2345 | 2400 | 3.26948770214 |
| NM_054016    | SRSF10  | 1830 | 1900 | 4.85846779548 |
| NM_054016    | SRSF10  | 217  | 477  | 7.66582272509 |
| NM_020786    | PDP2    | 205  | 251  | 6.97560043524 |
| NM_020784    | TXNDC16 | 1043 | 1067 | 6.65388108521 |
| NM_020784    | TXNDC16 | 1146 | 1229 | 7.64986349259 |
| NM_020784    | TXNDC16 | 1777 | 1879 | 6.65388109276 |
| NM_001206840 | TGOLN2  | 6074 | 6152 | 5.45661254702 |
| NM_001206840 | TGOLN2  | 570  | 642  | 4.8716500463  |
| NM_001206840 | TGOLN2  | 3492 | 3549 | 7.45661254702 |
| NM_001206840 | TGOLN2  | 2995 | 3092 | 6.67900496835 |
| NM_001206840 | TGOLN2  | 4914 | 4996 | 5.8716500463  |
| NM_001206840 | TGOLN2  | 2876 | 2926 | 3.87147629598 |
| NM_001206840 | TGOLN2  | 5019 | 5061 | 3.86763244612 |
| NM_001206840 | TGOLN2  | 2204 | 2315 | 6.19357814118 |
| NM_001206840 | TGOLN2  | 2693 | 2720 | 4.86763244612 |
| NM_001206840 | TGOLN2  | 5288 | 5395 | 6.19357814118 |
| NM_001206840 | TGOLN2  | 5547 | 5640 | 4.8716500463  |
| NM_001206840 | TGOLN2  | 3827 | 3982 | 7.8716500463  |
| NM_001206840 | TGOLN2  | 4634 | 4686 | 5.87165004629 |
| NM_001206840 | TGOLN2  | 2720 | 2787 | 6.45661254702 |
| NM_001206840 | TGOLN2  | 4825 | 4913 | 6.67900496835 |
| NM_001206840 | TGOLN2  | 90   | 112  | 3.78751083691 |
| NM_001206840 | TGOLN2  | 2498 | 2672 | 7.45661254702 |
| NM_001206840 | TGOLN2  | 4158 | 4391 | 8.26396746908 |

|              |         |      |      |               |
|--------------|---------|------|------|---------------|
| NM_001206840 | TGOLN2  | 3150 | 3469 | 9.26396746908 |
| NM_001206840 | TGOLN2  | 5890 | 6074 | 7.8716500463  |
| NM_001206840 | TGOLN2  | 3986 | 4090 | 6.19357814118 |
| NM_001206840 | TGOLN2  | 2343 | 2498 | 7.67900496835 |
| NM_001206840 | TGOLN2  | 5134 | 5245 | 5.45661254702 |
| NM_001206840 | TGOLN2  | 334  | 568  | 6.67900496835 |
| NM_001206840 | TGOLN2  | 3582 | 3820 | 8.04157504774 |
| NM_001206840 | TGOLN2  | 1706 | 2197 | 9.98017450307 |
| NM_001206840 | TGOLN2  | 5652 | 5882 | 8.26396746908 |
| NM_001206840 | TGOLN2  | 655  | 1075 | 7.45661254702 |
| NM_001206840 | TGOLN2  | 5448 | 5528 | 3.87165004607 |
| NM_001206840 | TGOLN2  | 4408 | 4609 | 7.95911288755 |
| NM_001206840 | TGOLN2  | 6154 | 6393 | 8.04157504774 |
| NM_001206840 | TGOLN2  | 1262 | 1642 | 9.39521200235 |
| NM_020782    | KLHDC5  | 795  | 855  | 9.35980915012 |
| NM_020782    | KLHDC5  | 1144 | 1198 | 8.36382651438 |
| NM_020781    | ZNF398  | 5196 | 5214 | 10.1611211617 |
| NM_032802    | SPPL2A  | 1854 | 1893 | 6.51347045172 |
| NM_032802    | SPPL2A  | 1934 | 1993 | 5.5174880519  |
| NM_032802    | SPPL2A  | 264  | 458  | 9.16134424167 |
| NM_032802    | SPPL2A  | 821  | 1234 | 10.4482253895 |
| NM_032802    | SPPL2A  | 1260 | 1356 | 7.5174880519  |
| NM_032802    | SPPL2A  | 531  | 821  | 9.47168436228 |
| NM_032802    | SPPL2A  | 1399 | 1852 | 10.4716843623 |
| NM_198204    | MLX     | 530  | 572  | 4.21918519447 |
| NM_198204    | MLX     | 1118 | 1165 | 5.80414769519 |
| NM_198204    | MLX     | 949  | 1021 | 5.8043214455  |
| NM_198204    | MLX     | 1201 | 1283 | 5.80414769519 |
| NM_198204    | MLX     | 584  | 644  | 5.21534134461 |
| NM_198204    | MLX     | 694  | 823  | 5.21935894479 |
| NM_032804    | ADO     | 1518 | 1572 | 7.9585763923  |
| NM_032804    | ADO     | 475  | 538  | 6.95456552318 |
| NM_000696    | ALDH9A1 | 321  | 401  | 6.04959220877 |
| NM_000696    | ALDH9A1 | 1952 | 2016 | 5.04941869437 |
| NM_000696    | ALDH9A1 | 2022 | 2116 | 7.04959244468 |
| NM_000696    | ALDH9A1 | 131  | 197  | 5.04958571363 |
| NM_000696    | ALDH9A1 | 1472 | 1512 | 6.63455494518 |
| NM_000696    | ALDH9A1 | 1538 | 1685 | 7.04959244468 |
| NM_000696    | ALDH9A1 | 633  | 698  | 5.04959243713 |
| NM_000696    | ALDH9A1 | 1246 | 1413 | 7.63455494541 |
| NM_032809    | FAM73B  | 2580 | 2623 | 9.19461661101 |
| NM_000692    | ALDH1B1 | 1366 | 1431 | 4.55933045426 |
| NM_000692    | ALDH1B1 | 211  | 264  | 4.55933694939 |
| NM_000692    | ALDH1B1 | 588  | 651  | 5.55933694939 |
| NM_000692    | ALDH1B1 | 652  | 736  | 5.55933717776 |
| NM_000690    | ALDH2   | 249  | 326  | 6.03255925813 |
| NM_000690    | ALDH2   | 1795 | 1833 | 4.94842004896 |
| NM_025150    | TARS2   | 250  | 309  | 8.50214449869 |
| NM_025150    | TARS2   | 1346 | 1412 | 6.91734901723 |
| NM_025150    | TARS2   | 1844 | 1901 | 6.91333814811 |

|              |         |      |      |               |
|--------------|---------|------|------|---------------|
| NM_025150    | TARS2   | 1428 | 1481 | 6.91734901723 |
| NM_025150    | TARS2   | 1643 | 1706 | 6.91735551237 |
| NM_025150    | TARS2   | 822  | 873  | 8.49830064883 |
| NM_025150    | TARS2   | 517  | 555  | 7.8332165389  |
| NM_025150    | TARS2   | 1294 | 1343 | 6.91734901723 |
| NM_025150    | TARS2   | 2089 | 2206 | 9.23928384317 |
| NM_025150    | TARS2   | 1122 | 1207 | 7.91735574828 |
| NM_016561    | BFAR    | 563  | 619  | 6.70966749335 |
| NM_016561    | BFAR    | 1046 | 1096 | 5.38372179829 |
| NM_016561    | BFAR    | 1997 | 2049 | 5.38773939091 |
| NM_016561    | BFAR    | 1300 | 1341 | 5.97270166326 |
| NM_016561    | BFAR    | 1343 | 1469 | 7.5576643999  |
| NM_016561    | BFAR    | 881  | 952  | 6.97270189918 |
| NM_016561    | BFAR    | 1097 | 1244 | 7.19509432052 |
| NM_016561    | BFAR    | 1888 | 1964 | 5.38773916254 |
| NM_016561    | BFAR    | 743  | 858  | 6.70966749334 |
| NM_016561    | BFAR    | 1525 | 1738 | 7.19509432052 |
| NM_016561    | BFAR    | 2085 | 2249 | 6.70966749335 |
| NM_016561    | BFAR    | 157  | 462  | 8.29462999407 |
| NM_016567    | BCCIP   | 672  | 719  | 3.47064345682 |
| NM_016567    | BCCIP   | 576  | 618  | 3.38650424766 |
| NM_016567    | BCCIP   | 408  | 537  | 3.47064345704 |
| NM_016567    | BCCIP   | 106  | 300  | 4.05560595776 |
| NM_016565    | CHCHD8  | 148  | 256  | 4.28465273425 |
| NM_016565    | CHCHD8  | 54   | 110  | 4.28447898394 |
| NM_001199693 | SLC4A2  | 158  | 252  | 9.79932630155 |
| NM_001199693 | SLC4A2  | 1474 | 1518 | 8.47739820666 |
| NM_001199693 | SLC4A2  | 673  | 713  | 7.47739797074 |
| NM_001199693 | SLC4A2  | 118  | 154  | 7.47739797074 |
| NM_001199693 | SLC4A2  | 1544 | 1652 | 10.0623607074 |
| NM_001199693 | SLC4A2  | 1971 | 2114 | 9.47739820666 |
| NM_001199693 | SLC4A2  | 1152 | 1453 | 12.1212543964 |
| NM_001199693 | SLC4A2  | 255  | 347  | 9.47739820666 |
| NM_001199693 | SLC4A2  | 1653 | 1959 | 12.6868515723 |
| NM_001199693 | SLC4A2  | 2775 | 3009 | 11.9368298253 |
| NM_001199693 | SLC4A2  | 3079 | 3492 | 13.0009601627 |
| NM_001199693 | SLC4A2  | 352  | 579  | 10.9368298253 |
| NM_001199693 | SLC4A2  | 3501 | 3849 | 11.9368298253 |
| NM_001199693 | SLC4A2  | 2139 | 2741 | 13.6868515723 |
| NM_001199693 | SLC4A2  | 1020 | 1149 | 11.1778379248 |
| NM_001199693 | SLC4A2  | 762  | 1004 | 11.6473232081 |
| NM_017969    | IWS1    | 351  | 393  | 4.35813206907 |
| NM_017969    | IWS1    | 572  | 628  | 4.35795831898 |
| NM_017969    | IWS1    | 1955 | 2043 | 4.94308783896 |
| NM_145039    | CENPBD1 | 2575 | 2623 | 7.32668504452 |
| NM_203365    | RAPH1   | 658  | 748  | 8.43301170697 |
| NM_203365    | RAPH1   | 452  | 509  | 9.43301169943 |
| NM_203365    | RAPH1   | 221  | 335  | 10.240366629  |
| NM_203365    | RAPH1   | 1246 | 1413 | 9.43301170698 |
| NM_203364    | CAPRIN1 | 3125 | 3158 | 2.19283565094 |

|              |            |      |      |                  |
|--------------|------------|------|------|------------------|
| NM_203364    | CAPRIN1    | 1539 | 1656 | 5.36677825255    |
| NM_203364    | CAPRIN1    | 1928 | 1992 | 3.78181574428    |
| NM_203364    | CAPRIN1    | 3330 | 3389 | 2.19283565094    |
| NM_203364    | CAPRIN1    | 1176 | 1289 | 3.19685325111    |
| NM_203364    | CAPRIN1    | 556  | 616  | 2.19684652005    |
| NM_203364    | CAPRIN1    | 619  | 928  | 7.00420817317    |
| NM_203364    | CAPRIN1    | 2136 | 2243 | 5.65628486975    |
| NM_203364    | CAPRIN1    | 1297 | 1523 | 6.10374384672    |
| NM_203364    | CAPRIN1    | 1072 | 1174 | 4.19685325111    |
| NM_203364    | CAPRIN1    | 938  | 1059 | 3.78181575183    |
| NM_203364    | CAPRIN1    | 1659 | 1736 | 3.78181575183    |
| NM_203364    | CAPRIN1    | 1999 | 2135 | 5.65628486975    |
| NM_203364    | CAPRIN1    | 2348 | 2441 | 4.51878133845    |
| NM_203364    | CAPRIN1    | 1749 | 1901 | 4.518781346      |
| NM_203364    | CAPRIN1    | 316  | 447  | 4.19685325111    |
| NM_138733    | PGK2       | 829  | 877  | 11.9767353283    |
| NM_183404    | RBL1       | 991  | 1056 | 8.25048465667    |
| NM_183404    | RBL1       | 1565 | 1633 | 7.17036304746    |
| NM_183404    | RBL1       | 2522 | 2575 | 8.25048465667    |
| NM_145030    | C7orf47    | 693  | 803  | 10.087392271     |
| NM_145030    | C7orf47    | 100  | 160  | 10.0873855399    |
| NM_002128    | HMGB1      | 963  | 1019 | 3.34493852634    |
| NM_002128    | HMGB1      | 64   | 247  | 3.83036535351    |
| NM_002128    | HMGB1      | 444  | 588  | 4.92990102706    |
| NM_002128    | HMGB1      | 706  | 950  | 4.60797293217    |
| NM_002128    | HMGB1      | 282  | 373  | 2.02301043145    |
| NM_002128    | HMGB1      | 1093 | 1315 | 4.83036535351    |
| NM_002126    | HLF        | 2647 | 2704 | 1.98668238219    |
| NM_016009    | SH3GLB1    | 985  | 1082 | 5.46016932885    |
| NM_016009    | SH3GLB1    | 322  | 355  | 3.45615172868    |
| NM_016009    | SH3GLB1    | 1105 | 1156 | 6.04513182958    |
| NM_016009    | SH3GLB1    | 1846 | 1911 | 4.4601625978     |
| NM_016009    | SH3GLB1    | 4106 | 4182 | 5.0411142294     |
| NM_016009    | SH3GLB1    | 882  | 967  | 5.04513182957    |
| NM_016009    | SH3GLB1    | 6229 | 6291 | 5.04513182203    |
| NM_016009    | SH3GLB1    | 1591 | 1638 | 3.37603011947    |
| NM_016009    | SH3GLB1    | 1509 | 1556 | 3.37603011947    |
| NM_016009    | SH3GLB1    | 4400 | 4456 | 3.45615172868    |
| NM_016009    | SH3GLB1    | 536  | 750  | 5.04513182958    |
| NM_016009    | SH3GLB1    | 5335 | 5405 | 5.04495807926    |
| NM_016009    | SH3GLB1    | 1221 | 1376 | 5.78209742374    |
| NM_001199823 | NEDD8-MDP1 |      | 89   | 202 3.0808726578 |
| NM_013302    | EEF2K      | 996  | 1098 | 6.89410706397    |
| NM_013302    | EEF2K      | 1601 | 1666 | 7.47906957224    |
| NM_013302    | EEF2K      | 4548 | 4597 | 5.89410707152    |
| NM_013302    | EEF2K      | 2944 | 3039 | 7.47906957224    |
| NM_013302    | EEF2K      | 2233 | 2355 | 7.47906957224    |
| NM_013302    | EEF2K      | 1867 | 1931 | 6.89008947135    |
| NM_001024736 | CD276      | 2274 | 2337 | 4.89007932363    |
| NM_001024736 | CD276      | 1326 | 1379 | 4.88606195938    |

|              |         |      |      |               |
|--------------|---------|------|------|---------------|
| NM_001024736 | CD276   | 2893 | 2941 | 4.88606195938 |
| NM_001024736 | CD276   | 741  | 848  | 7.47504206027 |
| NM_001024736 | CD276   | 2340 | 2409 | 6.88606195938 |
| NM_001024736 | CD276   | 1773 | 1858 | 6.89007955954 |
| NM_001024736 | CD276   | 672  | 725  | 4.88606195938 |
| NM_001024736 | CD276   | 1564 | 1768 | 7.21200765444 |
| NM_001024736 | CD276   | 2024 | 2253 | 8.06000456099 |
| NM_001024736 | CD276   | 3255 | 3332 | 4.890079552   |
| NM_001024736 | CD276   | 1202 | 1276 | 6.47504206027 |
| NM_001024736 | CD276   | 516  | 632  | 7.21200765444 |
| NM_001024736 | CD276   | 1395 | 1502 | 7.47504206027 |
| NM_006590    | USP39   | 1001 | 1049 | 6.00517641518 |
| NM_006590    | USP39   | 322  | 427  | 5.59415651607 |
| NM_006590    | USP39   | 431  | 496  | 7.00919401535 |
| NM_006590    | USP39   | 1695 | 1784 | 6.0091940078  |
| NM_006590    | USP39   | 1051 | 1110 | 6.33111537919 |
| NM_006590    | USP39   | 1964 | 2007 | 5.5901389159  |
| NM_006590    | USP39   | 1511 | 1573 | 5.59415651607 |
| NM_006590    | USP39   | 1799 | 1852 | 5.59415651585 |
| NM_006590    | USP39   | 806  | 856  | 4.00517641518 |
| NM_006590    | USP39   | 1118 | 1170 | 6.33112211002 |
| NM_006590    | USP39   | 1379 | 1430 | 5.59415651607 |
| NM_006590    | USP39   | 1226 | 1330 | 6.00919401535 |
| NM_006590    | USP39   | 1344 | 1376 | 4.00517641518 |
| NM_006590    | USP39   | 909  | 962  | 6.00919401535 |
| NM_006590    | USP39   | 2073 | 2126 | 5.59414978502 |
| NM_006590    | USP39   | 2133 | 2192 | 5.00517641518 |
| NM_006590    | USP39   | 586  | 653  | 5.0091872843  |
| NM_006597    | HSPA8   | 199  | 2426 | 8.6125850612  |
| NM_006595    | API5    | 1028 | 1069 | 6.59192772205 |
| NM_006595    | API5    | 167  | 198  | 5.0909306804  |
| NM_006595    | API5    | 946  | 998  | 6.67204933126 |
| NM_006595    | API5    | 1989 | 2061 | 6.67204933126 |
| NM_006595    | API5    | 549  | 638  | 6.67606692389 |
| NM_006595    | API5    | 657  | 775  | 7.67606693144 |
| NM_006595    | API5    | 1141 | 1219 | 5.09109769966 |
| NM_006595    | API5    | 338  | 449  | 7.4130325256  |
| NM_006595    | API5    | 803  | 905  | 7.4130325256  |
| NM_006595    | API5    | 1789 | 1832 | 5.08708683054 |
| NM_006598    | SLC12A7 | 4070 | 4128 | 6.75604271349 |
| NM_006598    | SLC12A7 | 2984 | 3056 | 6.75604271348 |
| NM_006598    | SLC12A7 | 4769 | 4877 | 7.34100521421 |
| NM_006598    | SLC12A7 | 3692 | 3752 | 7.34100521421 |
| NM_006598    | SLC12A7 | 2125 | 2198 | 7.75604271349 |
| NM_006598    | SLC12A7 | 254  | 333  | 7.34100521421 |
| NM_006598    | SLC12A7 | 5011 | 5100 | 7.34100521421 |
| NM_006598    | SLC12A7 | 1038 | 1147 | 7.75604271349 |
| NM_006598    | SLC12A7 | 3058 | 3161 | 7.75604271349 |
| NM_006598    | SLC12A7 | 3186 | 3278 | 6.75604271349 |
| NM_006598    | SLC12A7 | 4216 | 4271 | 5.6719035041  |



|           |         |      |      |               |
|-----------|---------|------|------|---------------|
| NM_006598 | SLC12A7 | 3625 | 3659 | 5.75202511331 |
| NM_006598 | SLC12A7 | 1302 | 1343 | 8.07796407732 |
| NM_006598 | SLC12A7 | 2473 | 2570 | 7.75604271349 |
| NM_006598 | SLC12A7 | 596  | 776  | 9.45648243163 |
| NM_006598 | SLC12A7 | 436  | 583  | 8.92596771493 |
| NM_006598 | SLC12A7 | 1419 | 1641 | 9.07797080838 |
| NM_006598 | SLC12A7 | 3478 | 3602 | 8.34100521421 |
| NM_006598 | SLC12A7 | 876  | 1018 | 7.75604271349 |
| NM_006598 | SLC12A7 | 2358 | 2454 | 8.34100521421 |
| NM_006598 | SLC12A7 | 4368 | 4631 | 9.6629333091  |
| NM_006598 | SLC12A7 | 2599 | 2683 | 7.3410052142  |
| NM_006598 | SLC12A7 | 2685 | 2905 | 9.45648243163 |
| NM_006598 | SLC12A7 | 2207 | 2353 | 7.75604271349 |
| NM_006598 | SLC12A7 | 3309 | 3388 | 7.34100521421 |
| NM_006598 | SLC12A7 | 1725 | 2110 | 10.6140237086 |
| NM_006598 | SLC12A7 | 5108 | 5272 | 9.21547433213 |
| NM_006598 | SLC12A7 | 1172 | 1270 | 5.75604271349 |
| NM_006598 | SLC12A7 | 3785 | 4069 | 9.75604271349 |
| NM_002870 | RAB13   | 1109 | 1170 | 5.89645205731 |
| NM_002870 | RAB13   | 312  | 390  | 4.39562203492 |
| NM_002870 | RAB13   | 39   | 134  | 6.39562853006 |
| NM_002870 | RAB13   | 201  | 306  | 5.98059126647 |
| NM_002695 | POLR2E  | 1516 | 1590 | 5.61430594578 |
| NM_002695 | POLR2E  | 1434 | 1507 | 6.02934344505 |
| NM_002695 | POLR2E  | 1187 | 1257 | 6.35127153994 |
| NM_002695 | POLR2E  | 797  | 847  | 6.02934344505 |
| NM_002695 | POLR2E  | 854  | 930  | 6.02934344505 |
| NM_002695 | POLR2E  | 1107 | 1180 | 4.02934320914 |
| NM_002695 | POLR2E  | 1590 | 1630 | 3.94520423567 |
| NM_002695 | POLR2E  | 2040 | 2109 | 4.02916969474 |
| NM_002695 | POLR2E  | 446  | 589  | 4.02934344505 |
| NM_002695 | POLR2E  | 732  | 772  | 4.02532584488 |
| NM_002695 | POLR2E  | 65   | 191  | 6.35127153994 |
| NM_002696 | POLR2G  | 495  | 639  | 9.10246007445 |
| NM_002696 | POLR2G  | 752  | 809  | 7.10228632413 |
| NM_002696 | POLR2G  | 318  | 418  | 7.10246007445 |
| NM_002697 | POU2F1  | 9458 | 9515 | 12.2680202665 |
| NM_002697 | POU2F1  | 4880 | 4958 | 13.2640026739 |
| NM_002697 | POU2F1  | 3068 | 3110 | 12.2640026739 |
| NM_002874 | RAD23B  | 433  | 512  | 4.08774692333 |
| NM_002874 | RAD23B  | 961  | 1032 | 4.82471251749 |
| NM_002874 | RAD23B  | 760  | 844  | 4.50278442261 |
| NM_002874 | RAD23B  | 1930 | 1982 | 3.50261067229 |
| NM_002874 | RAD23B  | 687  | 733  | 3.5027844226  |
| NM_002874 | RAD23B  | 1303 | 1343 | 2.50277769155 |
| NM_002874 | RAD23B  | 1660 | 1703 | 2.50278418669 |
| NM_002874 | RAD23B  | 2485 | 2514 | 2.41864521322 |
| NM_002874 | RAD23B  | 1983 | 2091 | 4.50278442261 |
| NM_002874 | RAD23B  | 1484 | 1625 | 5.96221604124 |
| NM_002874 | RAD23B  | 83   | 149  | 3.50278442261 |

|           |        |      |      |               |
|-----------|--------|------|------|---------------|
| NM_002874 | RAD23B | 1164 | 1226 | 4.0877469231  |
| NM_002691 | POLD1  | 457  | 507  | 7.09842625672 |
| NM_002691 | POLD1  | 1316 | 1407 | 8.0944153876  |
| NM_002691 | POLD1  | 1245 | 1313 | 9.09843298778 |
| NM_002691 | POLD1  | 2654 | 2694 | 8.0944153876  |
| NM_002691 | POLD1  | 165  | 228  | 9.09843298778 |
| NM_002691 | POLD1  | 609  | 662  | 7.01429377839 |
| NM_002691 | POLD1  | 788  | 843  | 7.0944153876  |
| NM_002691 | POLD1  | 2197 | 2268 | 7.09842625672 |
| NM_002691 | POLD1  | 1921 | 2093 | 8.6833954885  |
| NM_002691 | POLD1  | 1804 | 1909 | 7.09843298778 |
| NM_002691 | POLD1  | 1492 | 1614 | 8.09843298778 |
| NM_002693 | POLG   | 1058 | 1120 | 6.13569496506 |
| NM_002693 | POLG   | 849  | 911  | 7.21983417444 |
| NM_002693 | POLG   | 3391 | 3441 | 6.13569496506 |
| NM_002693 | POLG   | 2083 | 2153 | 7.21966042412 |
| NM_002693 | POLG   | 2927 | 2977 | 6.21581657427 |
| NM_002693 | POLG   | 2482 | 2541 | 8.21983393852 |
| NM_002693 | POLG   | 2729 | 2779 | 6.21983393852 |
| NM_002693 | POLG   | 1388 | 1488 | 8.21983417444 |
| NM_002693 | POLG   | 4294 | 4411 | 6.21983417444 |
| NM_002693 | POLG   | 1716 | 1807 | 7.21982744339 |
| NM_018491 | CBWD1  | 552  | 588  | 6.03356434242 |
| NM_018491 | CBWD1  | 741  | 813  | 6.03758194237 |
| NM_018491 | CBWD1  | 989  | 1074 | 7.03758194259 |
| NM_018491 | CBWD1  | 370  | 452  | 6.62254444331 |
| NM_018491 | CBWD1  | 247  | 353  | 6.03758194259 |
| NM_018491 | CBWD1  | 55   | 218  | 7.62254444331 |
| NM_018491 | CBWD1  | 813  | 867  | 5.03740819227 |
| NM_018490 | LGR4   | 3318 | 3375 | 7.39500181556 |
| NM_018490 | LGR4   | 927  | 986  | 7.97996431629 |
| NM_018490 | LGR4   | 2266 | 2348 | 7.97996431629 |
| NM_018490 | LGR4   | 4698 | 4750 | 6.31086260618 |
| NM_018490 | LGR4   | 1489 | 1539 | 7.39500180801 |
| NM_018490 | LGR4   | 1422 | 1462 | 7.71675616013 |
| NM_018490 | LGR4   | 1878 | 1941 | 7.39500181556 |
| NM_018490 | LGR4   | 706  | 739  | 5.39499508451 |
| NM_018490 | LGR4   | 3386 | 3445 | 6.97979056597 |
| NM_018490 | LGR4   | 3770 | 3850 | 6.39500181534 |
| NM_018490 | LGR4   | 2187 | 2232 | 6.97996431629 |
| NM_018490 | LGR4   | 1642 | 1732 | 8.20235673762 |
| NM_018490 | LGR4   | 4330 | 4394 | 6.97996431628 |
| NM_018490 | LGR4   | 1343 | 1390 | 6.8958251069  |
| NM_018490 | LGR4   | 4122 | 4232 | 7.97996431629 |
| NM_018490 | LGR4   | 4233 | 4328 | 6.97996431629 |
| NM_018490 | LGR4   | 1259 | 1338 | 5.39500181556 |
| NM_018490 | LGR4   | 1772 | 1853 | 6.39499508451 |
| NM_018490 | LGR4   | 1076 | 1211 | 8.56492681701 |
| NM_018490 | LGR4   | 1996 | 2030 | 5.31086260618 |
| NM_018490 | LGR4   | 779  | 816  | 5.39098421539 |

|              |       |      |      |               |
|--------------|-------|------|------|---------------|
| NM_018490    | LGR4  | 3550 | 3635 | 5.39500181556 |
| NM_018490    | LGR4  | 2755 | 3092 | 10.7525538202 |
| NM_018490    | LGR4  | 3144 | 3303 | 8.39500181556 |
| NM_018490    | LGR4  | 2084 | 2169 | 8.20235673762 |
| NM_001024457 | RGPD1 | 978  | 1057 | 9.88017539245 |
| NM_001024457 | RGPD1 | 1863 | 1909 | 7.8801686614  |
| NM_001024457 | RGPD1 | 819  | 879  | 8.79603618307 |
| NM_001024457 | RGPD1 | 614  | 700  | 10.4651378932 |
| NM_001024457 | RGPD1 | 1976 | 2031 | 8.88017538491 |
| NM_001024457 | RGPD1 | 3011 | 3045 | 7.87615779228 |
| NM_001024457 | RGPD1 | 1403 | 1464 | 8.87615779228 |
| NM_001024457 | RGPD1 | 3428 | 3507 | 8.88017515654 |
| NM_001024457 | RGPD1 | 1176 | 1226 | 8.87615779228 |
| NM_001024457 | RGPD1 | 2900 | 2969 | 8.88017515654 |
| NM_001024457 | RGPD1 | 3319 | 3396 | 8.88017538491 |
| NM_018492    | PBK   | 699  | 729  | 5.64992393725 |
| NM_018492    | PBK   | 507  | 559  | 6.73004554647 |
| NM_018492    | PBK   | 894  | 956  | 7.23488643798 |
| NM_018492    | PBK   | 990  | 1078 | 7.73406314642 |
| NM_001156    | ANXA7 | 687  | 773  | 5.66306999116 |
| NM_001156    | ANXA7 | 1365 | 1479 | 6.07810748289 |
| NM_001156    | ANXA7 | 1048 | 1126 | 6.07810749043 |
| NM_001156    | ANXA7 | 570  | 685  | 6.07810749044 |
| NM_001156    | ANXA7 | 1142 | 1359 | 7.88546241249 |
| NM_001156    | ANXA7 | 1521 | 1666 | 6.40003558532 |
| NM_001156    | ANXA7 | 778  | 1042 | 8.77854720858 |
| NM_001156    | ANXA7 | 471  | 566  | 6.66306999116 |
| NM_001145098 | SKIL  | 3038 | 3089 | 6.50745623989 |
| NM_001145098 | SKIL  | 4317 | 4360 | 6.50745623989 |
| NM_001145098 | SKIL  | 3944 | 3980 | 7.00828626228 |
| NM_001145098 | SKIL  | 5700 | 5764 | 5.50746296339 |
| NM_001145098 | SKIL  | 1219 | 1318 | 6.50746297072 |
| NM_001145098 | SKIL  | 5848 | 5883 | 5.42332376156 |
| NM_001145098 | SKIL  | 1056 | 1107 | 7.09242547166 |
| NM_001145098 | SKIL  | 5329 | 5400 | 5.50746297072 |
| NM_001145098 | SKIL  | 911  | 950  | 7.50746273503 |
| NM_001145098 | SKIL  | 423  | 466  | 6.50344537077 |
| NM_001145098 | SKIL  | 6160 | 6197 | 6.42332376156 |
| NM_001145098 | SKIL  | 5459 | 5508 | 6.50745623989 |
| NM_001145098 | SKIL  | 661  | 714  | 5.50728922063 |
| NM_001145098 | SKIL  | 6313 | 6361 | 5.50344537077 |
| NM_001145098 | SKIL  | 5629 | 5682 | 5.50746273503 |
| NM_001145098 | SKIL  | 1787 | 1841 | 5.50746273503 |
| NM_001145098 | SKIL  | 537  | 623  | 5.50728922063 |
| NM_001145098 | SKIL  | 5212 | 5265 | 5.50728922063 |
| NM_001145098 | SKIL  | 1952 | 2009 | 5.50344537077 |
| NM_001145098 | SKIL  | 6549 | 6664 | 7.50746297094 |
| NM_001145098 | SKIL  | 2023 | 2220 | 7.82939106583 |
| NM_001145098 | SKIL  | 3216 | 3287 | 7.09242547166 |
| NM_001145098 | SKIL  | 4764 | 4871 | 7.09242546412 |

|              |        |      |      |               |
|--------------|--------|------|------|---------------|
| NM_001145098 | SKIL   | 4988 | 5103 | 7.82939106583 |
| NM_001145098 | SKIL   | 1454 | 1511 | 6.50746297072 |
| NM_001145098 | SKIL   | 261  | 340  | 7.09242523575 |
| NM_001145548 | ZDHHC7 | 3059 | 3132 | 6.90934894141 |
| NM_001145548 | ZDHHC7 | 3140 | 3192 | 6.90934893386 |
| NM_001145548 | ZDHHC7 | 255  | 307  | 7.90934221036 |
| NM_001145548 | ZDHHC7 | 1192 | 1251 | 7.9093489414  |
| NM_001145548 | ZDHHC7 | 2658 | 2751 | 8.90934894141 |
| NM_001145548 | ZDHHC7 | 2048 | 2097 | 6.82520973203 |
| NM_001145548 | ZDHHC7 | 2238 | 2274 | 7.82520973203 |
| NM_001145548 | ZDHHC7 | 993  | 1183 | 11.0792739429 |
| NM_001145548 | ZDHHC7 | 497  | 596  | 9.2312770363  |
| NM_001145548 | ZDHHC7 | 2759 | 2913 | 10.6097886596 |
| NM_001145548 | ZDHHC7 | 349  | 466  | 8.90934894141 |
| NM_207292    | MBNL1  | 1110 | 1187 | 7.17514908159 |
| NM_207292    | MBNL1  | 3471 | 3546 | 7.17514908159 |
| NM_207292    | MBNL1  | 5361 | 5402 | 7.17113148142 |
| NM_207292    | MBNL1  | 1054 | 1110 | 6.17514908159 |
| NM_207292    | MBNL1  | 4855 | 4924 | 6.17113148142 |
| NM_207292    | MBNL1  | 5066 | 5155 | 6.17514907404 |
| NM_207292    | MBNL1  | 1323 | 1404 | 8.17514908159 |
| NM_207292    | MBNL1  | 2065 | 2125 | 7.17514908137 |
| NM_207292    | MBNL1  | 6237 | 6288 | 7.17514884567 |
| NM_207292    | MBNL1  | 4505 | 4586 | 7.17113148142 |
| NM_207292    | MBNL1  | 1899 | 1994 | 7.76011158231 |
| NM_207292    | MBNL1  | 4679 | 4724 | 6.09100987221 |
| NM_207292    | MBNL1  | 2894 | 2964 | 8.49707717647 |
| NM_207292    | MBNL1  | 1757 | 1879 | 6.17514908159 |
| NM_207292    | MBNL1  | 2406 | 2468 | 6.17514884567 |
| NM_207292    | MBNL1  | 1203 | 1300 | 6.17514907404 |
| NM_001085399 | RELL1  | 192  | 267  | 9.24769642128 |
| NM_001085399 | RELL1  | 386  | 432  | 9.24752267097 |
| NM_001085399 | RELL1  | 708  | 776  | 9.24367882111 |
| NM_001085399 | RELL1  | 268  | 358  | 11.0550513433 |
| NM_001039690 | CHTF8  | 2508 | 2547 | 6.59747823504 |
| NM_001039690 | CHTF8  | 2244 | 2291 | 6.6816174442  |
| NM_001039690 | CHTF8  | 284  | 315  | 5.59747823504 |
| NM_001039690 | CHTF8  | 2630 | 2686 | 6.68161720851 |
| NM_001039690 | CHTF8  | 636  | 697  | 7.26657321409 |
| NM_001039690 | CHTF8  | 358  | 431  | 7.26657994515 |
| NM_001039690 | CHTF8  | 481  | 599  | 6.68161744443 |
| NM_001039690 | CHTF8  | 123  | 230  | 5.68161744443 |
| NM_001039690 | CHTF8  | 1032 | 1094 | 6.68161071337 |
| NM_001039690 | CHTF8  | 2335 | 2408 | 8.003371789   |
| NM_001039697 | SNAPC3 | 2019 | 2092 | 5.03998057658 |
| NM_014663    | KDM4A  | 3794 | 3833 | 6.61745566349 |
| NM_014663    | KDM4A  | 2530 | 2585 | 6.61762917789 |
| NM_014663    | KDM4A  | 1015 | 1073 | 6.61361181364 |
| NM_014663    | KDM4A  | 2201 | 2258 | 7.53349020443 |
| NM_014547    | TMOD3  | 3540 | 3589 | 6.23483670411 |

|              |          |      |      |               |               |
|--------------|----------|------|------|---------------|---------------|
| NM_014547    | TMOD3    | 3837 | 3903 | 6.81578160466 |               |
| NM_014547    | TMOD3    | 1546 | 1704 | 8.23483670411 |               |
| NM_014547    | TMOD3    | 646  | 685  | 7.23081910394 |               |
| NM_014547    | TMOD3    | 2529 | 2605 | 8.2348367041  |               |
| NM_014547    | TMOD3    | 1475 | 1544 | 6.23482997306 |               |
| NM_014547    | TMOD3    | 1381 | 1448 | 6.23081910394 |               |
| NM_014547    | TMOD3    | 1157 | 1210 | 5.23466295379 |               |
| NM_014547    | TMOD3    | 1027 | 1156 | 6.23483670411 |               |
| NM_014547    | TMOD3    | 165  | 420  | 8.93527642225 |               |
| NM_014547    | TMOD3    | 1233 | 1332 | 5.23483646819 |               |
| NM_014547    | TMOD3    | 696  | 852  | 6.81979920483 |               |
| NM_178448    | C9orf140 |      | 2958 | 3012          | 7.66619930408 |
| NM_178448    | C9orf140 |      | 3066 | 3128          | 9.25116180458 |
| NM_178448    | C9orf140 |      | 771  | 815           | 8.66218170391 |
| NM_178448    | C9orf140 |      | 1469 | 1548          | 7.66619930408 |
| NM_178448    | C9orf140 |      | 201  | 269           | 8.66619930408 |
| NM_178448    | C9orf140 |      | 3404 | 3452          | 9.16702259542 |
| NM_178448    | C9orf140 |      | 3485 | 3566          | 8.66619257303 |
| NM_178448    | C9orf140 |      | 1765 | 1832          | 7.66619929653 |
| NM_178448    | C9orf140 |      | 1140 | 1231          | 9.25116156888 |
| NM_005474    | HDAC5    | 2850 | 2917 | 4.72291208648 |               |
| NM_005474    | HDAC5    | 3202 | 3273 | 4.80705105995 |               |
| NM_005476    | GNE      | 4581 | 4653 | 6.57542085583 |               |
| NM_005476    | GNE      | 2402 | 2435 | 6.49128164644 |               |
| NM_005476    | GNE      | 1878 | 1978 | 8.5754208556  |               |
| NM_005476    | GNE      | 1127 | 1187 | 7.57524710551 |               |
| NM_005476    | GNE      | 1688 | 1762 | 8.57541412477 |               |
| NM_018469    | TEX2     | 2271 | 2351 | 8.67576528077 |               |
| NM_018469    | TEX2     | 3106 | 3153 | 7.34981958571 |               |
| NM_018469    | TEX2     | 3256 | 3310 | 7.93879295555 |               |
| NM_018469    | TEX2     | 1662 | 1725 | 8.35383718588 |               |
| NM_018469    | TEX2     | 1399 | 1477 | 8.35383718588 |               |
| NM_018469    | TEX2     | 3603 | 3656 | 7.93879295555 |               |
| NM_018469    | TEX2     | 957  | 1024 | 8.35383718588 |               |
| NM_018469    | TEX2     | 1984 | 2069 | 7.35383718588 |               |
| NM_018469    | TEX2     | 2680 | 2764 | 8.9387996866  |               |
| NM_018469    | TEX2     | 4451 | 4524 | 6.35366343556 |               |
| NM_018469    | TEX2     | 321  | 426  | 7.35383718588 |               |
| NM_018469    | TEX2     | 1742 | 1920 | 8.9387996866  |               |
| NM_018469    | TEX2     | 3946 | 3984 | 6.2696979765  |               |
| NM_018469    | TEX2     | 1504 | 1655 | 8.9387996866  |               |
| NM_018469    | TEX2     | 2768 | 2943 | 10.054276904  |               |
| NM_018469    | TEX2     | 464  | 552  | 8.67576528077 |               |
| NM_018469    | TEX2     | 598  | 700  | 6.35383718588 |               |
| NM_018469    | TEX2     | 3364 | 3457 | 6.35383718588 |               |
| NM_018469    | TEX2     | 130  | 193  | 7.34981958571 |               |
| NM_018469    | TEX2     | 4722 | 4798 | 6.35383045483 |               |
| NM_000303    | PMM2     | 1894 | 1982 | 3.9542639471  |               |
| NM_000303    | PMM2     | 471  | 576  | 2.95425721604 |               |
| NM_001035223 | RGL3     | 2279 | 2371 | 11.3930591046 |               |

|              |        |      |      |               |
|--------------|--------|------|------|---------------|
| NM_001035223 | RGL3   | 311  | 403  | 9.06711340956 |
| NM_001035223 | RGL3   | 793  | 840  | 9.06711340956 |
| NM_080840    | PTPRA  | 2819 | 2916 | 4.8187725236  |
| NM_080840    | PTPRA  | 2145 | 2210 | 3.1496708135  |
| NM_080840    | PTPRA  | 1048 | 1114 | 4.1496708135  |
| NM_080840    | PTPRA  | 2310 | 2365 | 3.23381002266 |
| NM_080840    | PTPRA  | 384  | 491  | 5.23380329183 |
| NM_080840    | PTPRA  | 2983 | 3069 | 4.23381001533 |
| NM_001007527 | LMBRD2 | 2320 | 2392 | 10.0689233243 |
| NM_001007527 | LMBRD2 | 1249 | 1300 | 10.4839608234 |
| NM_001007527 | LMBRD2 | 938  | 987  | 9.47994322344 |
| NM_001007527 | LMBRD2 | 638  | 703  | 9.48396082339 |
| NM_001007527 | LMBRD2 | 1886 | 1953 | 10.4839608236 |
| NM_001007527 | LMBRD2 | 1004 | 1128 | 11.0689233243 |
| NM_001007527 | LMBRD2 | 2050 | 2155 | 10.0689233243 |
| NM_001007527 | LMBRD2 | 401  | 582  | 11.8058889185 |
| NM_001007527 | LMBRD2 | 748  | 905  | 11.4839608236 |
| NM_001007527 | LMBRD2 | 33   | 171  | 9.48396082361 |
| NM_001007527 | LMBRD2 | 1526 | 1685 | 12.1844005418 |
| NM_001007527 | LMBRD2 | 3042 | 3085 | 9.98478411495 |
| NM_001007527 | LMBRD2 | 1699 | 1883 | 12.3908514192 |
| NM_001007527 | LMBRD2 | 2392 | 2532 | 11.8058889185 |
| NM_018464    | CISD1  | 263  | 316  | 8.09883302782 |
| NM_018464    | CISD1  | 338  | 421  | 8.09883303537 |
| NM_018464    | CISD1  | 96   | 138  | 6.6927657311  |
| NM_018464    | CISD1  | 143  | 254  | 8.36186744121 |
| NM_018464    | CISD1  | 429  | 613  | 9.94682994193 |
| NM_003611    | OFD1   | 2800 | 2860 | 5.38008846369 |
| NM_003611    | OFD1   | 1525 | 1605 | 5.38410605632 |
| NM_003610    | RAE1   | 1111 | 1148 | 6.84139798404 |
| NM_003610    | RAE1   | 1479 | 1523 | 8.16734367155 |
| NM_003610    | RAE1   | 1189 | 1297 | 7.84541558421 |
| NM_003610    | RAE1   | 589  | 686  | 7.84541558421 |
| NM_003610    | RAE1   | 762  | 907  | 8.65277050627 |
| NM_003610    | RAE1   | 506  | 560  | 5.84139798404 |
| NM_207122    | EXT2   | 1278 | 1326 | 6.22345887601 |
| NM_207122    | EXT2   | 2020 | 2122 | 8.5453869709  |
| NM_207122    | EXT2   | 2140 | 2240 | 8.39338387745 |
| NM_207122    | EXT2   | 1765 | 1840 | 6.22345887601 |
| NM_207122    | EXT2   | 2485 | 2537 | 7.54538697089 |
| NM_207122    | EXT2   | 317  | 381  | 7.80842137673 |
| NM_207122    | EXT2   | 2402 | 2481 | 8.22345887601 |
| NM_207122    | EXT2   | 1701 | 1755 | 7.22345887601 |
| NM_207122    | EXT2   | 381  | 443  | 6.80440377656 |
| NM_207122    | EXT2   | 3188 | 3234 | 5.13931966663 |
| NM_207122    | EXT2   | 467  | 551  | 7.5453869709  |
| NM_207122    | EXT2   | 2948 | 3040 | 6.80842137673 |
| NM_207122    | EXT2   | 1540 | 1606 | 6.80842136918 |
| NM_207122    | EXT2   | 850  | 924  | 7.22345864009 |
| NM_207122    | EXT2   | 586  | 841  | 9.22345887601 |

|              |         |      |      |               |
|--------------|---------|------|------|---------------|
| NM_207122    | EXT2    | 928  | 1056 | 8.03081379807 |
| NM_207122    | EXT2    | 1841 | 2015 | 9.31092171726 |
| NM_207122    | EXT2    | 1329 | 1523 | 8.80842137673 |
| NM_207122    | EXT2    | 2544 | 2741 | 8.68289049465 |
| NM_207122    | EXT2    | 176  | 241  | 6.80842137673 |
| NM_001171091 | UBXN6   | 1180 | 1248 | 7.04002668798 |
| NM_001171091 | UBXN6   | 465  | 519  | 5.45104658709 |
| NM_001171091 | UBXN6   | 527  | 655  | 6.45506417971 |
| NM_001110303 | USP20   | 3498 | 3557 | 8.7372895807  |
| NM_001110303 | USP20   | 3435 | 3496 | 9.7372895807  |
| NM_014329    | EDC4    | 2477 | 2521 | 6.85713631087 |
| NM_014329    | EDC4    | 4107 | 4163 | 7.52623802098 |
| NM_014329    | EDC4    | 1938 | 1996 | 5.94127552026 |
| NM_014329    | EDC4    | 1150 | 1187 | 7.94127528434 |
| NM_014329    | EDC4    | 3490 | 3555 | 7.94127551271 |
| NM_014329    | EDC4    | 3645 | 3677 | 6.94127551271 |
| NM_014329    | EDC4    | 513  | 568  | 7.52623128993 |
| NM_014329    | EDC4    | 3973 | 4035 | 5.94126878921 |
| NM_014329    | EDC4    | 3285 | 3341 | 5.93725792009 |
| NM_014329    | EDC4    | 1791 | 1849 | 6.94110176994 |
| NM_014329    | EDC4    | 3372 | 3437 | 5.94127552004 |
| NM_014329    | EDC4    | 1378 | 1425 | 7.52623778506 |
| NM_014329    | EDC4    | 582  | 635  | 5.94110176994 |
| NM_014329    | EDC4    | 879  | 953  | 7.52623802098 |
| NM_014329    | EDC4    | 644  | 751  | 7.94127552026 |
| NM_014329    | EDC4    | 2337 | 2446 | 5.94127552026 |
| NM_014329    | EDC4    | 787  | 871  | 6.94127552004 |
| NM_014329    | EDC4    | 4167 | 4249 | 7.94127552026 |
| NM_014329    | EDC4    | 1607 | 1694 | 5.94127552026 |
| NM_014329    | EDC4    | 354  | 450  | 7.52623802098 |
| NM_014329    | EDC4    | 1466 | 1549 | 7.94127552026 |
| NM_014328    | RUSC1   | 2054 | 2151 | 10.2760823733 |
| NM_014328    | RUSC1   | 642  | 699  | 8.6871022726  |
| NM_014328    | RUSC1   | 1678 | 1734 | 8.69094612246 |
| NM_014328    | RUSC1   | 1202 | 1301 | 9.69111987278 |
| NM_014328    | RUSC1   | 1093 | 1138 | 8.60698066339 |
| NM_014328    | RUSC1   | 779  | 826  | 8.69094612246 |
| NM_014328    | RUSC1   | 1958 | 2049 | 11.2760823735 |
| NM_014328    | RUSC1   | 1813 | 1906 | 11.0130479677 |
| NM_014328    | RUSC1   | 2398 | 2477 | 9.69111987278 |
| NM_014328    | RUSC1   | 1540 | 1589 | 9.69111986523 |
| NM_014328    | RUSC1   | 2263 | 2346 | 11.4984747948 |
| NM_014328    | RUSC1   | 1139 | 1201 | 9.6871022726  |
| NM_014899    | RHOBTB3 | 3867 | 3933 | 6.75999518361 |
| NM_014899    | RHOBTB3 | 1045 | 1081 | 6.84011679282 |
| NM_014899    | RHOBTB3 | 2032 | 2089 | 7.84011679282 |
| NM_014899    | RHOBTB3 | 1085 | 1190 | 6.84396064268 |
| NM_014899    | RHOBTB3 | 1940 | 2029 | 6.84413415708 |
| NM_014899    | RHOBTB3 | 3533 | 3627 | 6.84413439299 |
| NM_014899    | RHOBTB3 | 717  | 830  | 9.42909689372 |

|              |          |      |      |               |               |
|--------------|----------|------|------|---------------|---------------|
| NM_001100829 | TMEM170B |      | 2311 | 2373          | 6.85056609923 |
| NM_014322    | OPN3     | 1682 | 1736 | 7.37222460881 |               |
| NM_014322    | OPN3     | 1012 | 1062 | 7.45234621802 |               |
| NM_014322    | OPN3     | 668  | 735  | 8.45636381064 |               |
| NM_014322    | OPN3     | 907  | 981  | 9.77829191307 |               |
| NM_014322    | OPN3     | 1739 | 1808 | 7.45234621802 |               |
| NM_014322    | OPN3     | 447  | 519  | 8.45636381819 |               |
| NM_014322    | OPN3     | 294  | 343  | 9.04132631891 |               |
| NM_014897    | ZNF652   | 3995 | 4059 | 9.36553351347 |               |
| NM_014897    | ZNF652   | 4620 | 4682 | 8.78057774381 |               |
| NM_014891    | PDAP1    | 290  | 347  | 3.03210485945 |               |
| NM_014891    | PDAP1    | 1072 | 1137 | 2.0280872595  |               |
| NM_014891    | PDAP1    | 933  | 1044 | 2.03210485967 |               |
| NM_014891    | PDAP1    | 423  | 502  | 3.6170673604  |               |
| NM_014891    | PDAP1    | 1176 | 1267 | 3.61304976022 |               |
| NM_014325    | COR01C   | 2469 | 2531 | 4.55119599691 |               |
| NM_014325    | COR01C   | 1777 | 1930 | 7.35855091897 |               |
| NM_014325    | COR01C   | 2171 | 2225 | 4.55119598936 |               |
| NM_014325    | COR01C   | 2893 | 2955 | 4.55102224659 |               |
| NM_014325    | COR01C   | 2104 | 2149 | 3.54717839674 |               |
| NM_014325    | COR01C   | 1974 | 2018 | 3.46705678753 |               |
| NM_014325    | COR01C   | 1571 | 1637 | 5.13615849741 |               |
| NM_014325    | COR01C   | 2034 | 2088 | 4.55119598936 |               |
| NM_014325    | COR01C   | 1475 | 1535 | 5.87312409179 |               |
| NM_014325    | COR01C   | 1245 | 1298 | 4.55118926586 |               |
| NM_014325    | COR01C   | 839  | 891  | 3.55119599669 |               |
| NM_014325    | COR01C   | 3298 | 3421 | 7.13615849763 |               |
| NM_014325    | COR01C   | 901  | 1055 | 7.25163571505 |               |
| NM_014325    | COR01C   | 1108 | 1243 | 7.63865883816 |               |
| NM_014325    | COR01C   | 2226 | 2390 | 7.79912351036 |               |
| NM_014325    | COR01C   | 2690 | 2751 | 5.13615849763 |               |
| NM_014325    | COR01C   | 2790 | 2848 | 5.87312409179 |               |
| NM_014325    | COR01C   | 562  | 818  | 8.40917699204 |               |
| NM_014325    | COR01C   | 1664 | 1772 | 5.13615849763 |               |
| NM_014325    | COR01C   | 3225 | 3282 | 4.55119599691 |               |
| NM_014325    | COR01C   | 3593 | 3652 | 5.13615849763 |               |
| NM_014325    | COR01C   | 3429 | 3583 | 5.13615849763 |               |
| NM_014325    | COR01C   | 2960 | 3048 | 5.55119599691 |               |
| NM_014325    | COR01C   | 3063 | 3212 | 6.55119599691 |               |
| NM_014325    | COR01C   | 2549 | 2683 | 4.55119599691 |               |
| NM_014325    | COR01C   | 71   | 554  | 8.97746075161 |               |
| NM_014325    | COR01C   | 1312 | 1467 | 6.13615849763 |               |
| NM_005614    | RHEB     | 422  | 481  | 5.59412446876 |               |
| NM_005614    | RHEB     | 1197 | 1252 | 4.0949477601  |               |
| NM_005614    | RHEB     | 702  | 770  | 4.17908696926 |               |
| NM_005614    | RHEB     | 770  | 1145 | 7.54832077915 |               |
| NM_005614    | RHEB     | 486  | 693  | 6.91605256365 |               |
| NM_005617    | RPS14    | 417  | 478  | 2.937858536   |               |
| NM_005617    | RPS14    | 491  | 529  | 2.35272228496 |               |
| NM_005617    | RPS14    | 351  | 391  | 1.3488784351  |               |



|              |           |      |      |               |               |
|--------------|-----------|------|------|---------------|---------------|
| NM_005617    | RPS14     | 17   | 322  | 6.25978663088 |               |
| NM_005611    | RBL2      | 2709 | 2782 | 6.59203308629 |               |
| NM_152734    | C6orf89   | 2010 | 2068 | 7.36146196632 |               |
| NM_152734    | C6orf89   | 569  | 677  | 8.68339679226 |               |
| NM_152734    | C6orf89   | 1186 | 1271 | 8.68339679226 |               |
| NM_152734    | C6orf89   | 265  | 353  | 7.94643119787 |               |
| NM_152734    | C6orf89   | 2117 | 2148 | 7.94643119787 |               |
| NM_152734    | C6orf89   | 2303 | 2359 | 7.94643119809 |               |
| NM_152734    | C6orf89   | 1333 | 1383 | 7.27732948799 |               |
| NM_152734    | C6orf89   | 174  | 262  | 9.36146869737 |               |
| NM_152734    | C6orf89   | 1084 | 1154 | 6.36129494705 |               |
| NM_152734    | C6orf89   | 1469 | 1528 | 8.68339679226 |               |
| NM_152734    | C6orf89   | 729  | 795  | 7.3574510972  |               |
| NM_152734    | C6orf89   | 5837 | 5894 | 7.3574510972  |               |
| NM_152734    | C6orf89   | 2210 | 2292 | 7.94643119809 |               |
| NM_152734    | C6orf89   | 4983 | 5053 | 7.36146869715 |               |
| NM_152734    | C6orf89   | 801  | 940  | 9.16882361943 |               |
| NM_152734    | C6orf89   | 2680 | 2750 | 6.27732948799 |               |
| NM_152734    | C6orf89   | 3710 | 3802 | 7.3574510972  |               |
| NM_152734    | C6orf89   | 1796 | 1849 | 6.27732948799 |               |
| NM_152734    | C6orf89   | 454  | 514  | 7.36129494705 |               |
| NM_152734    | C6orf89   | 1650 | 1724 | 6.3574510972  |               |
| NM_080594    | RNPS1     | 817  | 893  | 5.61495056469 |               |
| NM_080594    | RNPS1     | 1091 | 1179 | 5.61495055715 |               |
| NM_080594    | RNPS1     | 1870 | 1934 | 6.6149505647  |               |
| NM_080594    | RNPS1     | 604  | 654  | 4.53081135532 |               |
| NM_080594    | RNPS1     | 433  | 516  | 5.6149505647  |               |
| NM_080594    | RNPS1     | 1387 | 1532 | 6.93687865959 |               |
| NM_080594    | RNPS1     | 374  | 424  | 4.61477681438 |               |
| NM_080594    | RNPS1     | 1558 | 1685 | 7.19991306542 |               |
| NM_080593    | HIST1H2BK |      | 665  | 780           | 9.97001801841 |
| NM_080593    | HIST1H2BK |      | 396  | 475           | 7.9698442681  |
| NM_080593    | HIST1H2BK |      | 511  | 653           | 10.7773729405 |
| NM_080593    | HIST1H2BK |      | 176  | 363           | 11.1399430199 |
| NM_080593    | HIST1H2BK |      | 3    | 158           | 12.3623354412 |
| NM_023009    | MARCKSL1  |      | 1020 | 1100          | 7.06260235964 |
| NM_023009    | MARCKSL1  |      | 920  | 1003          | 7.79956795381 |
| NM_023009    | MARCKSL1  |      | 329  | 395           | 6.47763985892 |
| NM_023009    | MARCKSL1  |      | 497  | 557           | 6.47763985137 |
| NM_023009    | MARCKSL1  |      | 772  | 911           | 8.47763985892 |
| NM_023009    | MARCKSL1  |      | 1104 | 1545          | 10.001201815  |
| NM_001171894 | MEF2A     | 3311 | 3368 | 6.65590916053 |               |
| NM_001171894 | MEF2A     | 5431 | 5491 | 7.23686079213 |               |
| NM_001171894 | MEF2A     | 773  | 843  | 5.65189829141 |               |
| NM_001171894 | MEF2A     | 2338 | 2389 | 5.65574214127 |               |
| NM_001017964 | YDJC      | 953  | 1021 | 10.1494604957 |               |
| NM_001017964 | YDJC      | 818  | 862  | 8.56048039483 |               |
| NM_001017964 | YDJC      | 67   | 131  | 8.56432424469 |               |
| NM_001017964 | YDJC      | 730  | 777  | 8.48035878562 |               |
| NM_001017964 | YDJC      | 1090 | 1171 | 11.3718529171 |               |

|              |         |      |      |               |
|--------------|---------|------|------|---------------|
| NM_001017964 | YDJC    | 516  | 561  | 9.56048039483 |
| NM_001017964 | YDJC    | 899  | 943  | 8.56432424469 |
| NM_006224    | PITPNA  | 313  | 346  | 3.62923078522 |
| NM_006224    | PITPNA  | 1135 | 1201 | 4.62923078522 |
| NM_006224    | PITPNA  | 1965 | 1989 | 3.62923078522 |
| NM_006224    | PITPNA  | 3134 | 3180 | 4.62923078522 |
| NM_001144945 | MYL12B  | 321  | 419  | 5.10618316049 |
| NM_001144945 | MYL12B  | 151  | 246  | 5.25818625393 |
| NM_001144945 | MYL12B  | 430  | 831  | 7.29381016367 |
| NM_002370    | MAGOH   | 222  | 274  | 4.69213727532 |
| NM_002370    | MAGOH   | 517  | 578  | 5.69213704695 |
| NM_002370    | MAGOH   | 319  | 378  | 5.27709978359 |
| NM_001079518 | MED24   | 2650 | 2717 | 7.55389198869 |
| NM_001079518 | MED24   | 2508 | 2606 | 7.55389199624 |
| NM_001079518 | MED24   | 2271 | 2324 | 7.13885448942 |
| NM_001079518 | MED24   | 3059 | 3119 | 5.55389199624 |
| NM_001079518 | MED24   | 1334 | 1407 | 7.55389199624 |
| NM_001079518 | MED24   | 2376 | 2409 | 6.54987439607 |
| NM_001079518 | MED24   | 1275 | 1329 | 6.55371824593 |
| NM_001079518 | MED24   | 2105 | 2245 | 7.55389199624 |
| NM_001079518 | MED24   | 2813 | 2906 | 7.55389199624 |
| NM_001079518 | MED24   | 548  | 688  | 7.87582009113 |
| NM_001079518 | MED24   | 1130 | 1190 | 6.55389199602 |
| NM_001079518 | MED24   | 1809 | 1953 | 7.55389199624 |
| NM_001079518 | MED24   | 1022 | 1121 | 5.55389199624 |
| NM_003757    | EIF3I   | 1045 | 1088 | 2.29539578685 |
| NM_003757    | EIF3I   | 882  | 942  | 2.29155193699 |
| NM_003757    | EIF3I   | 1281 | 1328 | 2.29539578685 |
| NM_003757    | EIF3I   | 325  | 606  | 4.61749763205 |
| NM_003757    | EIF3I   | 67   | 323  | 4.88053203789 |
| NM_003757    | EIF3I   | 624  | 786  | 4.41104675458 |
| NM_001079514 | UBN1    | 4067 | 4116 | 6.04496500418 |
| NM_001079514 | UBN1    | 705  | 794  | 6.0489758733  |
| NM_001079514 | UBN1    | 4591 | 4674 | 6.0489825968  |
| NM_001079514 | UBN1    | 5522 | 5563 | 5.96484339497 |
| NM_001079514 | UBN1    | 5982 | 6017 | 5.96484339497 |
| NM_001079514 | UBN1    | 1053 | 1124 | 7.04898260435 |
| NM_001079514 | UBN1    | 1514 | 1583 | 6.04496500418 |
| NM_032020    | FUCA2   | 210  | 313  | 7.12863666714 |
| NM_032020    | FUCA2   | 1494 | 1770 | 9.04617450695 |
| NM_032020    | FUCA2   | 1807 | 1865 | 6.28063976059 |
| NM_032020    | FUCA2   | 1911 | 1957 | 3.87457245632 |
| NM_032020    | FUCA2   | 1429 | 1480 | 5.5435004161  |
| NM_032020    | FUCA2   | 2328 | 2399 | 4.95871165815 |
| NM_032020    | FUCA2   | 816  | 1362 | 10.3510290885 |
| NM_032020    | FUCA2   | 407  | 815  | 9.76606658776 |
| NM_032023    | RASSF4  | 1194 | 1242 | 7.34800464748 |
| NM_032023    | RASSF4  | 893  | 1015 | 8.08898784182 |
| NM_032023    | RASSF4  | 125  | 230  | 7.35202224766 |
| NM_152551    | SNRNP48 | 1166 | 1228 | 6.09072544123 |

|           |         |      |      |               |
|-----------|---------|------|------|---------------|
| NM_152551 | SNRNP48 | 3992 | 4031 | 4.09055169846 |
| NM_152551 | SNRNP48 | 378  | 451  | 4.09072521286 |
| NM_032025 | EIF2A   | 338  | 391  | 3.44497465253 |
| NM_032025 | EIF2A   | 836  | 904  | 5.11407636264 |
| NM_032025 | EIF2A   | 520  | 560  | 4.11390261232 |
| NM_032025 | EIF2A   | 214  | 288  | 2.52910713086 |
| NM_032025 | EIF2A   | 2037 | 2085 | 2.529113626   |
| NM_032025 | EIF2A   | 736  | 795  | 3.52911386192 |
| NM_032025 | EIF2A   | 910  | 1209 | 6.77704137536 |
| NM_032025 | EIF2A   | 106  | 182  | 4.11407636242 |
| NM_152881 | PTK7    | 1598 | 1641 | 6.93843978559 |
| NM_152881 | PTK7    | 2425 | 2478 | 6.93861353591 |
| NM_152881 | PTK7    | 456  | 510  | 5.35347728487 |
| NM_032027 | TM2D1   | 567  | 631  | 5.82909489851 |
| NM_032027 | TM2D1   | 1021 | 1068 | 8.15102948854 |
| NM_032027 | TM2D1   | 748  | 789  | 5.82909489851 |
| NM_032027 | TM2D1   | 948  | 1013 | 7.41406389437 |
| NM_032027 | TM2D1   | 798  | 903  | 8.41406413029 |
| NM_032027 | TM2D1   | 330  | 401  | 7.82909489851 |
| NM_032027 | TM2D1   | 1076 | 1174 | 8.15102972446 |
| NM_032027 | TM2D1   | 659  | 748  | 6.82910162957 |
| NM_182588 | RGPD4   | 1241 | 1294 | 9.09659693189 |
| NM_182588 | RGPD4   | 2613 | 2646 | 8.50761706692 |
| NM_182588 | RGPD4   | 3615 | 3708 | 8.51163466709 |
| NM_182588 | RGPD4   | 1663 | 1706 | 9.09257956764 |
| NM_182588 | RGPD4   | 6022 | 6097 | 7.51162793603 |
| NM_182588 | RGPD4   | 3014 | 3083 | 9.09642341749 |
| NM_182588 | RGPD4   | 711  | 793  | 9.83356276198 |
| NM_182588 | RGPD4   | 1930 | 2036 | 7.51163466709 |
| NM_182588 | RGPD4   | 1071 | 1190 | 10.0965971678 |
| NM_182588 | RGPD4   | 4336 | 4423 | 7.51163443117 |
| NM_182588 | RGPD4   | 2087 | 2165 | 7.4274954577  |
| NM_182588 | RGPD4   | 503  | 615  | 9.51163466709 |
| NM_182588 | RGPD4   | 912  | 973  | 9.09642341749 |
| NM_152558 | IQCE    | 2245 | 2294 | 10.6682116444 |
| NM_152558 | IQCE    | 2404 | 2458 | 12.2493302953 |
| NM_152558 | IQCE    | 1201 | 1261 | 12.2493302953 |
| NM_152558 | IQCE    | 5149 | 5222 | 10.6643677946 |
| NM_152889 | CHST13  | 194  | 251  | 9.19110212684 |
| NM_152889 | CHST13  | 869  | 916  | 9.78008222773 |
| NM_152889 | CHST13  | 82   | 107  | 8.19511299596 |
| NM_152889 | CHST13  | 253  | 314  | 8.19110212684 |
| NM_152889 | CHST13  | 981  | 1046 | 9.78008222773 |
| NM_152889 | CHST13  | 1053 | 1101 | 9.19494597669 |
| NM_152889 | CHST13  | 1337 | 1378 | 8.19494597669 |
| NM_152889 | CHST13  | 1704 | 1791 | 9.19511972701 |
| NM_152889 | CHST13  | 1640 | 1683 | 8.19494597669 |
| NM_152889 | CHST13  | 572  | 611  | 8.11098051763 |
| NM_152889 | CHST13  | 706  | 760  | 9.19511299596 |
| NM_152889 | CHST13  | 316  | 433  | 9.19511972701 |

|              |         |      |      |               |
|--------------|---------|------|------|---------------|
| NM_018275    | C7orf43 | 1373 | 1402 | 9.39067440466 |
| NM_001042532 | COASY   | 1166 | 1270 | 5.95187534506 |
| NM_001042532 | COASY   | 2141 | 2197 | 5.62994724263 |
| NM_001042532 | COASY   | 705  | 802  | 6.2149097509  |
| NM_001042532 | COASY   | 852  | 897  | 3.54580804079 |
| NM_001042532 | COASY   | 623  | 663  | 4.54580804079 |
| NM_001042532 | COASY   | 1949 | 2029 | 4.62592965    |
| NM_001042532 | COASY   | 521  | 623  | 5.62994725018 |
| NM_001042532 | COASY   | 950  | 1135 | 7.2149097509  |
| NM_001042532 | COASY   | 297  | 391  | 3.62994724995 |
| NM_001042532 | COASY   | 1330 | 1461 | 6.43730217223 |
| NM_001042532 | COASY   | 148  | 276  | 3.62994725018 |
| NM_001042532 | COASY   | 1578 | 1824 | 7.62994725018 |
| NM_198951    | TGM2    | 100  | 154  | 5.66640967592 |
| NM_198951    | TGM2    | 1291 | 1330 | 5.66623592561 |
| NM_198951    | TGM2    | 979  | 1059 | 7.66640967592 |
| NM_198951    | TGM2    | 1530 | 1580 | 7.25119842633 |
| NM_198951    | TGM2    | 1331 | 1423 | 6.66640967592 |
| NM_198951    | TGM2    | 243  | 314  | 7.24735457647 |
| NM_022662    | ANAPC1  | 3384 | 3421 | 6.52559269687 |
| NM_022662    | ANAPC1  | 1015 | 1066 | 4.9446475604  |
| NM_022662    | ANAPC1  | 4452 | 4498 | 4.944474046   |
| NM_022662    | ANAPC1  | 3916 | 3956 | 6.44547108766 |
| NM_022662    | ANAPC1  | 5638 | 5706 | 4.94464106527 |
| NM_022662    | ANAPC1  | 3851 | 3909 | 6.94464779632 |
| NM_022662    | ANAPC1  | 783  | 839  | 5.94464106527 |
| NM_022662    | ANAPC1  | 3064 | 3118 | 6.52960356599 |
| NM_022662    | ANAPC1  | 487  | 572  | 6.52961029704 |
| NM_022662    | ANAPC1  | 2317 | 2372 | 6.52961029704 |
| NM_022662    | ANAPC1  | 5261 | 5302 | 6.52559269687 |
| NM_022662    | ANAPC1  | 4375 | 4447 | 6.52943654672 |
| NM_022662    | ANAPC1  | 3128 | 3202 | 6.94464106527 |
| NM_022662    | ANAPC1  | 6054 | 6141 | 5.94464779632 |
| NM_022662    | ANAPC1  | 4780 | 4833 | 6.52559269687 |
| NM_022662    | ANAPC1  | 5760 | 5820 | 4.86050858694 |
| NM_022662    | ANAPC1  | 4224 | 4278 | 4.94063019615 |
| NM_022662    | ANAPC1  | 7440 | 7488 | 4.86050858694 |
| NM_022662    | ANAPC1  | 3587 | 3719 | 6.52961029704 |
| NM_022662    | ANAPC1  | 3762 | 3845 | 5.94464778877 |
| NM_022662    | ANAPC1  | 2844 | 2920 | 6.52961029704 |
| NM_022662    | ANAPC1  | 4631 | 4694 | 6.44547108766 |
| NM_022662    | ANAPC1  | 2549 | 2615 | 5.9446475604  |
| NM_022662    | ANAPC1  | 3424 | 3501 | 6.94464779632 |
| NM_022662    | ANAPC1  | 2222 | 2310 | 6.9446477961  |
| NM_022662    | ANAPC1  | 5455 | 5581 | 7.26657589121 |
| NM_001098833 | ATXN7L3 | 500  | 550  | 4.10047185602 |
| NM_001098833 | ATXN7L3 | 2674 | 2727 | 4.76956683507 |
| NM_001098833 | ATXN7L3 | 1386 | 1447 | 4.7693998158  |
| NM_001098833 | ATXN7L3 | 2556 | 2610 | 4.7695733302  |
| NM_001098833 | ATXN7L3 | 824  | 891  | 4.76957356612 |

|              |          |      |      |               |               |
|--------------|----------|------|------|---------------|---------------|
| NM_001098833 | ATXN7L3  | 431  | 482  | 3.18059346523 |               |
| NM_001098833 | ATXN7L3  | 157  | 269  | 5.50653916029 |               |
| NM_001098833 | ATXN7L3  | 2184 | 2270 | 4.76957356612 |               |
| NM_001098833 | ATXN7L3  | 3455 | 3614 | 5.1846110654  |               |
| NM_001098833 | ATXN7L3  | 955  | 1057 | 4.1846110654  |               |
| NM_016028    | SUV420H1 |      | 646  | 709           | 3.99804961643 |
| NM_016028    | SUV420H1 |      | 1096 | 1155          | 4.99788259716 |
| NM_016028    | SUV420H1 |      | 1780 | 1853          | 4.99788259716 |
| NM_016028    | SUV420H1 |      | 897  | 1021          | 3.99805634748 |
| NM_016028    | SUV420H1 |      | 1363 | 1430          | 3.99403874731 |
| NM_016029    | DHRS7    | 484  | 543  | 7.40237855984 |               |
| NM_016029    | DHRS7    | 975  | 1350 | 10.8174160591 |               |
| NM_016029    | DHRS7    | 113  | 482  | 10.8174160591 |               |
| NM_016029    | DHRS7    | 546  | 968  | 11.5178557773 |               |
| NM_016026    | RDH11    | 455  | 533  | 7.24658143404 |               |
| NM_016026    | RDH11    | 2300 | 2375 | 7.39858452749 |               |
| NM_016026    | RDH11    | 534  | 640  | 7.24658143404 |               |
| NM_016026    | RDH11    | 1586 | 1647 | 6.07665643259 |               |
| NM_016026    | RDH11    | 2114 | 2177 | 5.66161892577 |               |
| NM_016026    | RDH11    | 2222 | 2276 | 6.88401135466 |               |
| NM_016026    | RDH11    | 2025 | 2087 | 6.39858452749 |               |
| NM_016026    | RDH11    | 61   | 441  | 9.80457688716 |               |
| NM_016026    | RDH11    | 647  | 1151 | 10.0073937702 |               |
| NM_016026    | RDH11    | 1786 | 1955 | 6.0766564326  |               |
| NM_016026    | RDH11    | 1425 | 1531 | 4.0766564326  |               |
| NM_016026    | RDH11    | 1161 | 1392 | 8.0766564326  |               |
| NM_016027    | LACTB2   | 296  | 340  | 8.25112417751 |               |
| NM_016027    | LACTB2   | 445  | 502  | 8.33124578672 |               |
| NM_016024    | RBMX2    | 312  | 361  | 4.6890182782  |               |
| NM_016023    | OTUD6B   | 1127 | 1157 | 7.21640094126 |               |
| NM_016020    | TFB1M    | 262  | 367  | 6.73638888802 |               |
| NM_016020    | TFB1M    | 1007 | 1081 | 4.15125263698 |               |
| NM_015059    | TLN2     | 8981 | 9009 | 8.23614002409 |               |
| NM_015050    | FTSJD2   | 1142 | 1223 | 6.70818423041 |               |
| NM_015050    | FTSJD2   | 2372 | 2439 | 7.12322172991 |               |
| NM_015050    | FTSJD2   | 1726 | 1794 | 5.11920412974 |               |
| NM_015050    | FTSJD2   | 2052 | 2081 | 5.11920412974 |               |
| NM_015050    | FTSJD2   | 3729 | 3783 | 6.12304797959 |               |
| NM_015050    | FTSJD2   | 3240 | 3301 | 5.12321499886 |               |
| NM_015050    | FTSJD2   | 1275 | 1344 | 6.12322172969 |               |
| NM_015050    | FTSJD2   | 2454 | 2548 | 5.1232217299  |               |
| NM_015050    | FTSJD2   | 3426 | 3481 | 6.70817749958 |               |
| NM_015050    | FTSJD2   | 1581 | 1699 | 7.12322172991 |               |
| NM_015050    | FTSJD2   | 2571 | 2624 | 7.12322172236 |               |
| NM_015050    | FTSJD2   | 593  | 692  | 6.70818423041 |               |
| NM_015050    | FTSJD2   | 1814 | 1908 | 6.70818399471 |               |
| NM_015050    | FTSJD2   | 998  | 1138 | 7.4451498248  |               |
| NM_015050    | FTSJD2   | 703  | 801  | 7.1232217299  |               |
| NM_015050    | FTSJD2   | 1431 | 1580 | 8.4451498248  |               |
| NM_015051    | ERP44    | 513  | 582  | 5.49114010413 |               |

|              |           |       |       |               |               |
|--------------|-----------|-------|-------|---------------|---------------|
| NM_015051    | ERP44     | 73    | 134   | 4.90618433446 |               |
| NM_015051    | ERP44     | 461   | 512   | 5.90618433446 |               |
| NM_015051    | ERP44     | 631   | 838   | 8.90618433446 |               |
| NM_015051    | ERP44     | 185   | 333   | 6.49114683519 |               |
| NM_015051    | ERP44     | 1758  | 1802  | 5.4070076258  |               |
| NM_015051    | ERP44     | 1328  | 1445  | 6.90618433446 |               |
| NM_015051    | ERP44     | 845   | 1323  | 9.71353925652 |               |
| NM_015056    | RRP1B     | 2787  | 2838  | 5.4577064818  |               |
| NM_015056    | RRP1B     | 4906  | 5000  | 5.46172408197 |               |
| NM_015056    | RRP1B     | 963   | 1049  | 7.04668634678 |               |
| NM_015056    | RRP1B     | 3985  | 4055  | 6.46171735092 |               |
| NM_015056    | RRP1B     | 412   | 510   | 5.46172407443 |               |
| NM_015056    | RRP1B     | 766   | 829   | 7.04668657515 |               |
| NM_015056    | RRP1B     | 621   | 657   | 5.46155033166 |               |
| NM_015056    | RRP1B     | 3455  | 3515  | 8.04668634678 |               |
| NM_015056    | RRP1B     | 4784  | 4894  | 6.4577064818  |               |
| NM_015056    | RRP1B     | 2838  | 2915  | 5.46172407443 |               |
| NM_015056    | RRP1B     | 2495  | 2630  | 7.78365216931 |               |
| NM_015057    | MYCBP2    | 4619  | 4662  | 7.58511799677 |               |
| NM_015057    | MYCBP2    | 12547 | 12585 | 7.58110712765 |               |
| NM_015057    | MYCBP2    | 1704  | 1758  | 7.50098551844 |               |
| NM_015057    | MYCBP2    | 5395  | 5441  | 7.58110712765 |               |
| NM_015057    | MYCBP2    | 3627  | 3735  | 8.58512449191 |               |
| NM_015057    | MYCBP2    | 12918 | 12958 | 7.50098551844 |               |
| NM_015057    | MYCBP2    | 2674  | 2750  | 7.58511799677 |               |
| NM_015057    | MYCBP2    | 2370  | 2470  | 8.58512472028 |               |
| NM_015054    | UHRF1BP1L |       | 3926  | 4028          | 8.33773513777 |
| NM_015054    | UHRF1BP1L |       | 1970  | 2009          | 8.25359592861 |
| NM_015055    | SWAP70    | 2266  | 2302  | 5.78129477095 |               |
| NM_015055    | SWAP70    | 823   | 919   | 4.78146179022 |               |
| NM_015055    | SWAP70    | 1772  | 1918  | 5.78146852127 |               |
| NM_015055    | SWAP70    | 2403  | 2463  | 4.7774509211  |               |
| NM_033198    | PIGS      | 1228  | 1282  | 7.30778549033 |               |
| NM_033198    | PIGS      | 2460  | 2516  | 5.30777875927 |               |
| NM_033198    | PIGS      | 934   | 1036  | 8.47771049177 |               |
| NM_033198    | PIGS      | 1612  | 1832  | 9.11514041238 |               |
| NM_033198    | PIGS      | 1101  | 1215  | 8.89274799105 |               |
| NM_033198    | PIGS      | 757   | 891   | 8.30778549033 |               |
| NM_033198    | PIGS      | 599   | 755   | 8.11514041238 |               |
| NM_033198    | PIGS      | 1304  | 1416  | 9.21467608593 |               |
| NM_033198    | PIGS      | 1448  | 1607  | 8.76721710896 |               |
| NM_033198    | PIGS      | 2653  | 2872  | 8.89274799105 |               |
| NM_033198    | PIGS      | 2302  | 2358  | 6.30778549033 |               |
| NM_033198    | PIGS      | 2081  | 2192  | 6.89274799105 |               |
| NM_033198    | PIGS      | 2571  | 2647  | 6.30778549033 |               |
| NM_033198    | PIGS      | 1834  | 2070  | 8.89274799105 |               |
| NM_001082579 | RBF0X2    | 722   | 779   | 6.3619302121  |               |
| NM_004846    | EIF4E2    | 221   | 308   | 3.19567038565 |               |
| NM_004846    | EIF4E2    | 918   | 964   | 5.19567038565 |               |
| NM_004846    | EIF4E2    | 133   | 210   | 3.19549663534 |               |

|              |        |      |      |               |
|--------------|--------|------|------|---------------|
| NM_004846    | EIF4E2 | 758  | 899  | 4.78063288638 |
| NM_004846    | EIF4E2 | 529  | 577  | 4.11153117627 |
| NM_001018111 | PODXL  | 975  | 1026 | 11.8114085619 |
| NM_001018111 | PODXL  | 3500 | 3563 | 11.8073909617 |
| NM_001018112 | FANCA  | 250  | 327  | 7.85872413807 |
| NM_001018112 | FANCA  | 639  | 698  | 7.85855062367 |
| NM_001018112 | FANCA  | 474  | 573  | 9.85872436644 |
| NM_001018112 | FANCA  | 825  | 894  | 9.85872436644 |
| NM_025207    | FLAD1  | 1355 | 1414 | 8.36085669557 |
| NM_025207    | FLAD1  | 1758 | 1804 | 8.27671772211 |
| NM_025207    | FLAD1  | 1934 | 2006 | 8.36085693149 |
| NM_025207    | FLAD1  | 680  | 842  | 10.6827850264 |
| NM_001018115 | FANCD2 | 1353 | 1416 | 9.2425270262  |
| NM_001018115 | FANCD2 | 4360 | 4410 | 8.16240541699 |
| NM_001018115 | FANCD2 | 4442 | 4499 | 9.16240541699 |
| NM_018339    | RFK    | 493  | 565  | 7.77148364758 |
| NM_018339    | RFK    | 727  | 770  | 7.18634740409 |
| NM_018339    | RFK    | 666  | 696  | 6.10238194502 |
| NM_138501    | TECR   | 1023 | 1079 | 7.74601714586 |
| NM_138501    | TECR   | 423  | 983  | 10.2605903187 |
| NM_138501    | TECR   | 31   | 410  | 9.89285853418 |
| NM_001134439 | PHLDB2 | 5473 | 5552 | 8.24279309881 |
| NM_001134439 | PHLDB2 | 223  | 281  | 6.24261934872 |
| NM_001134439 | PHLDB2 | 1902 | 1990 | 6.24278636798 |
| NM_001134439 | PHLDB2 | 3476 | 3572 | 8.24278636798 |
| NM_001134439 | PHLDB2 | 1175 | 1244 | 6.24279309149 |
| NM_001134439 | PHLDB2 | 3149 | 3208 | 6.15865388965 |
| NM_001134439 | PHLDB2 | 655  | 695  | 6.15865388965 |
| NM_001134430 | TOR2A  | 801  | 862  | 9.14879139947 |
| NM_001134430 | TOR2A  | 1143 | 1210 | 10.7339276503 |
| NM_001134430 | TOR2A  | 879  | 944  | 10.1489651422 |
| NM_001570    | IRAK2  | 874  | 912  | 7.76134409725 |
| NM_001570    | IRAK2  | 1124 | 1163 | 7.68122248804 |
| NM_001570    | IRAK2  | 1175 | 1223 | 9.76536169742 |
| NM_001570    | IRAK2  | 2506 | 2569 | 7.68122248804 |
| NM_001570    | IRAK2  | 2604 | 2666 | 9.35031746709 |
| NM_001570    | IRAK2  | 1527 | 1619 | 7.76518794711 |
| NM_001570    | IRAK2  | 1620 | 1686 | 7.76536169742 |
| NM_001570    | IRAK2  | 2877 | 2924 | 7.68122248804 |
| NM_001570    | IRAK2  | 1009 | 1073 | 7.76536169743 |
| NM_001570    | IRAK2  | 293  | 348  | 8.68122248804 |
| NM_001570    | IRAK2  | 3048 | 3107 | 7.76134409725 |
| NM_001570    | IRAK2  | 87   | 202  | 10.0872897923 |
| NM_001570    | IRAK2  | 2721 | 2846 | 9.35032419815 |
| NM_004052    | BNIP3  | 666  | 803  | 3.3177340331  |
| NM_004053    | BYSL   | 1340 | 1386 | 6.1149574212  |
| NM_004053    | BYSL   | 1084 | 1167 | 5.11495742098 |
| NM_004053    | BYSL   | 694  | 749  | 5.11093982103 |
| NM_004058    | CAPS   | 1015 | 1065 | 11.8378494637 |
| NM_004058    | CAPS   | 84   | 116  | 10.2488693704 |

|              |          |      |      |                    |
|--------------|----------|------|------|--------------------|
| NM_004058    | CAPS     | 553  | 675  | 12.2528869705      |
| NM_004058    | CAPS     | 279  | 398  | 11.8378494713      |
| NM_000224    | KRT18    | 220  | 267  | 4.03938770174      |
| NM_000224    | KRT18    | 62   | 204  | 6.24102156291      |
| NM_000224    | KRT18    | 307  | 1016 | 8.14372436155      |
| NM_000224    | KRT18    | 1020 | 1446 | 7.17689122549      |
| NM_000221    | KHK      | 852  | 916  | 3.73053727637      |
| NM_000221    | KHK      | 517  | 570  | 3.73036376198      |
| NM_000221    | KHK      | 660  | 762  | 4.73053750474      |
| NM_001136499 | ZNF841   | 202  | 240  | 6.87996896748      |
| NM_021640    | C12orf10 |      | 626  | 691 7.95730673075  |
| NM_021640    | C12orf10 |      | 875  | 939 6.28820525656  |
| NM_017770    | ELOVL2   | 3109 | 3191 | 7.47199889938      |
| NM_017770    | ELOVL2   | 3027 | 3085 | 8.47199889938      |
| NM_017770    | ELOVL2   | 517  | 603  | 8.79392699427      |
| NM_017770    | ELOVL2   | 140  | 195  | 8.47199866346      |
| NM_017770    | ELOVL2   | 2887 | 2928 | 6.46798129921      |
| NM_017770    | ELOVL2   | 2518 | 2563 | 6.47199216833      |
| NM_017770    | ELOVL2   | 851  | 917  | 7.47182514906      |
| NM_017770    | ELOVL2   | 1731 | 1822 | 8.0569614001       |
| NM_017770    | ELOVL2   | 605  | 809  | 10.1724386175      |
| NM_017770    | ELOVL2   | 1238 | 1336 | 6.47199889938      |
| NM_017770    | ELOVL2   | 2253 | 2342 | 7.47199889938      |
| NM_017770    | ELOVL2   | 1857 | 1941 | 6.47199889938      |
| NM_017770    | ELOVL2   | 917  | 972  | 6.46798129921      |
| NM_017770    | ELOVL2   | 202  | 439  | 10.8643163222      |
| NM_017770    | ELOVL2   | 2700 | 2868 | 10.0569614001      |
| NM_017770    | ELOVL2   | 3815 | 4027 | 8.79392699427      |
| NM_017772    | TBC1D22B |      | 1099 | 1160 5.78256838917 |
| NM_017775    | TTC19    | 1302 | 1332 | 7.28066890417      |
| NM_017775    | TTC19    | 1511 | 1575 | 5.1965299307       |
| NM_017775    | TTC19    | 803  | 868  | 6.86563140489      |
| NM_017775    | TTC19    | 2528 | 2644 | 6.28066914009      |
| NM_017775    | TTC19    | 1435 | 1511 | 6.28066914009      |
| NM_017775    | TTC19    | 978  | 1035 | 6.28066240903      |
| NM_017775    | TTC19    | 1056 | 1148 | 7.60259723498      |
| NM_017775    | TTC19    | 1955 | 2005 | 5.28066913987      |
| NM_017775    | TTC19    | 2446 | 2507 | 7.28066914009      |
| NM_001142450 | SPNS1    | 1802 | 1845 | 6.99383769977      |
| NM_001142450 | SPNS1    | 783  | 855  | 7.5788002005       |
| NM_001142450 | SPNS1    | 858  | 998  | 8.80119262183      |
| NM_001142450 | SPNS1    | 1038 | 1177 | 9.69427741792      |
| NM_001142450 | SPNS1    | 454  | 774  | 10.7487252019      |
| NM_001142450 | SPNS1    | 2063 | 2119 | 5.99383769977      |
| NM_001142450 | SPNS1    | 1214 | 1713 | 10.9007282954      |
| NM_001142450 | SPNS1    | 59   | 165  | 7.99383769955      |
| NM_001142450 | SPNS1    | 166  | 321  | 9.16376270122      |
| NM_017779    | DEPDC1   | 2054 | 2128 | 7.55912266691      |
| NM_017779    | DEPDC1   | 750  | 817  | 7.55510506675      |
| NM_014487    | ZNF330   | 581  | 646  | 6.3869794705       |



|              |         |      |      |               |
|--------------|---------|------|------|---------------|
| NM_001031835 | PHKB    | 2140 | 2189 | 4.91810784686 |
| NM_001031835 | PHKB    | 3427 | 3450 | 4.00224705625 |
| NM_001031835 | PHKB    | 208  | 254  | 3.91810784686 |
| NM_001031835 | PHKB    | 3995 | 4039 | 3.99822945607 |
| NM_001013699 | H3F3C   | 217  | 274  | 4.79220718899 |
| NM_001013699 | H3F3C   | 504  | 544  | 5.79220718899 |
| NM_001013699 | H3F3C   | 427  | 478  | 5.79220718144 |
| NM_001013699 | H3F3C   | 568  | 622  | 7.11413504796 |
| NM_001013699 | H3F3C   | 801  | 836  | 6.37699593939 |
| NM_001013699 | H3F3C   | 37   | 95   | 6.37716968971 |
| NM_001013694 | SRRD    | 934  | 997  | 6.45481240333 |
| NM_001013694 | SRRD    | 157  | 254  | 7.53895161271 |
| NM_001013694 | SRRD    | 749  | 796  | 5.45481240333 |
| NM_001013694 | SRRD    | 383  | 476  | 5.53895161271 |
| NM_001013694 | SRRD    | 808  | 906  | 6.53895161271 |
| NM_001013694 | SRRD    | 647  | 732  | 6.53894488166 |
| NM_024927    | PLEKHH3 | 1957 | 2013 | 8.99200833844 |
| NM_024927    | PLEKHH3 | 154  | 222  | 9.99602570269 |
| NM_024927    | PLEKHH3 | 1691 | 1734 | 8.99585218829 |
| NM_024923    | NUP210  | 4111 | 4168 | 6.0191243032  |
| NM_024923    | NUP210  | 5031 | 5069 | 6.01895728394 |
| NM_024923    | NUP210  | 2547 | 2605 | 7.60408680392 |
| NM_024923    | NUP210  | 1618 | 1690 | 8.01913103426 |
| NM_024923    | NUP210  | 6082 | 6185 | 9.1890560357  |
| NM_024923    | NUP210  | 4785 | 4850 | 8.01913103403 |
| NM_024923    | NUP210  | 5989 | 6076 | 7.01913102671 |
| NM_024923    | NUP210  | 1999 | 2070 | 8.01913103426 |
| NM_024923    | NUP210  | 4954 | 5017 | 8.34105912914 |
| NM_024923    | NUP210  | 3484 | 3542 | 7.6000759348  |
| NM_024923    | NUP210  | 3816 | 3881 | 6.01511343408 |
| NM_024923    | NUP210  | 1223 | 1300 | 8.82648595631 |
| NM_024923    | NUP210  | 2446 | 2530 | 7.01913102671 |
| NM_024923    | NUP210  | 4185 | 4257 | 7.01913103426 |
| NM_024923    | NUP210  | 5200 | 5266 | 7.01913102671 |
| NM_024923    | NUP210  | 425  | 498  | 7.01913103426 |
| NM_024923    | NUP210  | 5881 | 5961 | 8.01913103426 |
| NM_024923    | NUP210  | 5321 | 5393 | 7.01913103426 |
| NM_024923    | NUP210  | 997  | 1031 | 7.01511343408 |
| NM_024923    | NUP210  | 6225 | 6299 | 7.01913103403 |
| NM_024923    | NUP210  | 1103 | 1140 | 8.01913103426 |
| NM_024923    | NUP210  | 7062 | 7176 | 8.01913103426 |
| NM_024923    | NUP210  | 530  | 649  | 9.01913103426 |
| NM_024923    | NUP210  | 6579 | 6713 | 8.60409353498 |
| NM_024923    | NUP210  | 5516 | 5602 | 7.01913103426 |
| NM_024923    | NUP210  | 1404 | 1478 | 8.34105912914 |
| NM_024923    | NUP210  | 3125 | 3174 | 6.93499182487 |
| NM_024923    | NUP210  | 1795 | 1876 | 7.60409353498 |
| NM_024923    | NUP210  | 5069 | 5103 | 6.01511343408 |
| NM_024923    | NUP210  | 4283 | 4419 | 9.01913103426 |
| NM_024923    | NUP210  | 6349 | 6450 | 7.60409353497 |

|              |         |      |      |               |
|--------------|---------|------|------|---------------|
| NM_024923    | NUP210  | 6457 | 6548 | 7.01913103426 |
| NM_024923    | NUP210  | 2071 | 2310 | 8.34105912914 |
| NM_024923    | NUP210  | 4610 | 4724 | 8.01895728394 |
| NM_024923    | NUP210  | 3619 | 3708 | 6.01511343408 |
| NM_024923    | NUP210  | 778  | 965  | 8.82648595631 |
| NM_024923    | NUP210  | 2924 | 3061 | 8.34105912914 |
| NM_024923    | NUP210  | 3881 | 3931 | 7.01913079834 |
| NM_017515    | SLC35F2 | 809  | 899  | 11.4850067015 |
| NM_017515    | SLC35F2 | 1135 | 1217 | 10.0255750828 |
| NM_017515    | SLC35F2 | 1063 | 1134 | 9.02557508282 |
| NM_017515    | SLC35F2 | 1258 | 1441 | 11.3475031777 |
| NM_017514    | PLXNA3  | 2824 | 2882 | 7.99342977537 |
| NM_017514    | PLXNA3  | 2895 | 2943 | 8.98941241112 |
| NM_017514    | PLXNA3  | 6202 | 6258 | 7.98941241112 |
| NM_017514    | PLXNA3  | 3694 | 3732 | 8.98941241112 |
| NM_017514    | PLXNA3  | 3904 | 3956 | 7.98941241112 |
| NM_017514    | PLXNA3  | 845  | 955  | 7.99343001107 |
| NM_017514    | PLXNA3  | 4327 | 4396 | 7.98941241112 |
| NM_017510    | TMED9   | 870  | 944  | 5.15556575723 |
| NM_017510    | TMED9   | 50   | 226  | 7.10309833734 |
| NM_017510    | TMED9   | 0    | 40   | 4.67013893006 |
| NM_017510    | TMED9   | 1036 | 1346 | 7.30240714556 |
| NM_017510    | TMED9   | 954  | 1027 | 5.15556575723 |
| NM_017510    | TMED9   | 244  | 708  | 7.80764245381 |
| NM_017510    | TMED9   | 725  | 853  | 5.34821083517 |
| NM_032959    | POLR2J2 | 330  | 385  | 6.18184197618 |
| NM_032959    | POLR2J2 | 641  | 695  | 7.18166822587 |
| NM_032959    | POLR2J2 | 142  | 179  | 6.17782437601 |
| NM_032959    | POLR2J2 | 1021 | 1092 | 6.18166822587 |
| NM_032959    | POLR2J2 | 1259 | 1325 | 6.18184197618 |
| NM_032959    | POLR2J2 | 399  | 539  | 8.50377007107 |
| NM_032959    | POLR2J2 | 1487 | 1577 | 6.18184197596 |
| NM_173647    | RNF149  | 229  | 326  | 7.45407905899 |
| NM_173647    | RNF149  | 732  | 791  | 7.45407905898 |
| NM_173647    | RNF149  | 1776 | 1859 | 7.45407905898 |
| NM_173647    | RNF149  | 29   | 112  | 7.1321509641  |
| NM_173647    | RNF149  | 151  | 195  | 5.04801175471 |
| NM_173647    | RNF149  | 857  | 1053 | 8.71711346482 |
| NM_173647    | RNF149  | 579  | 679  | 6.7171134646  |
| NM_173647    | RNF149  | 1353 | 1402 | 5.13197721378 |
| NM_173647    | RNF149  | 1207 | 1327 | 6.71711346482 |
| NM_017519    | ARID1B  | 2152 | 2205 | 6.16662988622 |
| NM_017519    | ARID1B  | 5134 | 5211 | 7.17064075533 |
| NM_017519    | ARID1B  | 4892 | 4996 | 8.75560998711 |
| NM_017519    | ARID1B  | 4996 | 5057 | 7.75560325606 |
| NM_001017368 | RFFL    | 1680 | 1759 | 8.1045746733  |
| NM_001017368 | RFFL    | 3332 | 3366 | 7.4354729632  |
| NM_001017368 | RFFL    | 590  | 669  | 7.51961216503 |
| NM_001017368 | RFFL    | 309  | 386  | 7.51559457241 |
| NM_001017368 | RFFL    | 867  | 930  | 7.51943842226 |

|              |         |      |      |                |
|--------------|---------|------|------|----------------|
| NM_001017368 | RFFL    | 3872 | 3988 | 7.51961217258  |
| NM_001017368 | RFFL    | 942  | 1027 | 6.51961193666  |
| NM_001017368 | RFFL    | 1235 | 1271 | 8.02043546392  |
| NM_001017368 | RFFL    | 1492 | 1595 | 6.51961217258  |
| NM_001017368 | RFFL    | 1089 | 1193 | 9.1045746733   |
| NM_001017368 | RFFL    | 3435 | 3511 | 6.51961193666  |
| NM_001017368 | RFFL    | 1764 | 1836 | 7.51960544153  |
| NM_001017368 | RFFL    | 71   | 225  | 9.51961217258  |
| NM_152699    | SENP5   | 4932 | 4990 | 6.71959124773  |
| NM_152699    | SENP5   | 2721 | 2746 | 6.63946963852  |
| NM_152699    | SENP5   | 2485 | 2561 | 7.71959124773  |
| NM_152699    | SENP5   | 1515 | 1589 | 6.72360861199  |
| NM_152699    | SENP5   | 5811 | 5906 | 6.72360884769  |
| NM_152699    | SENP5   | 1950 | 2030 | 6.72360884769  |
| NM_001017367 | C4BPB   | 534  | 584  | 5.65701401703  |
| NM_001017367 | C4BPB   | 835  | 929  | 6.98295971209  |
| NM_001017367 | C4BPB   | 591  | 832  | 8.98295971209  |
| NM_001017367 | C4BPB   | 343  | 525  | 7.98295971209  |
| NM_001017367 | C4BPB   | 25   | 218  | 8.24599411792  |
| NM_001017367 | C4BPB   | 220  | 334  | 8.24599411792  |
| NM_001242409 | FAM59A  | 1266 | 1340 | 11.5193290079  |
| NM_001242409 | FAM59A  | 3097 | 3165 | 11.1884239869  |
| NM_001242409 | FAM59A  | 1064 | 1113 | 9.60346798136  |
| NM_001242409 | FAM59A  | 72   | 125  | 9.59945061711  |
| NM_001242409 | FAM59A  | 3448 | 3515 | 10.5994506171  |
| NM_001242409 | FAM59A  | 1484 | 1563 | 9.60346820973  |
| NM_001242409 | FAM59A  | 2550 | 2586 | 9.5193290079   |
| NM_001242409 | FAM59A  | 1805 | 1939 | 11.6034682173  |
| NM_032323    | TMEM79  | 1094 | 1158 | 9.49868297162  |
| NM_006109    | PRMT5   | 2042 | 2102 | 7.16092103258  |
| NM_006109    | PRMT5   | 1827 | 1949 | 7.74588353331  |
| NM_006109    | PRMT5   | 378  | 556  | 6.57595853187  |
| NM_006109    | PRMT5   | 770  | 854  | 7.38331345393  |
| NM_006109    | PRMT5   | 1082 | 1191 | 6.57595853187  |
| NM_006109    | PRMT5   | 1649 | 1804 | 6.57595853187  |
| NM_006109    | PRMT5   | 2418 | 2478 | 4.5719409317   |
| NM_006100    | ST3GAL6 | 1379 | 1481 | 7.77357887447  |
| NM_006101    | NDC80   | 511  | 559  | 4.69886108262  |
| NM_006101    | NDC80   | 1007 | 1104 | 4.70287867525  |
| NM_006101    | NDC80   | 571  | 625  | 6.02480654176  |
| NM_006101    | NDC80   | 851  | 927  | 5.28382358334  |
| NM_152321    | ERP27   | 1299 | 1364 | 11.3668028048  |
| NM_152321    | ERP27   | 348  | 434  | 10.7816667897  |
| NM_003425    | ZNF45   | 594  | 643  | 9.20910799678  |
| NM_003425    | ZNF45   | 702  | 746  | 10.7940704975  |
| NM_006107    | LUC7L3  | 1621 | 1696 | 1.19252644575  |
| NM_006107    | LUC7L3  | 1709 | 1787 | 1.1925197147   |
| NM_006107    | LUC7L3  | 1805 | 1942 | 3.51445454064  |
| NM_006107    | LUC7L3  | 290  | 341  | 0.192519714698 |
| NM_172218    | SPAG1   | 2110 | 2158 | 8.54146456478  |

|              |         |      |      |                |
|--------------|---------|------|------|----------------|
| NM_172218    | SPAG1   | 2503 | 2571 | 8.54146456478  |
| NM_172218    | SPAG1   | 3576 | 3688 | 8.54147129583  |
| NM_153705    | KDELC2  | 2050 | 2092 | 5.08458771913  |
| NM_153705    | KDELC2  | 670  | 747  | 8.40651581402  |
| NM_153705    | KDELC2  | 3984 | 4013 | 5.00044850974  |
| NM_153705    | KDELC2  | 1485 | 1527 | 7.4065155781   |
| NM_153705    | KDELC2  | 1788 | 1819 | 6.66553261968  |
| NM_153705    | KDELC2  | 3570 | 3603 | 5.00044850974  |
| NM_153705    | KDELC2  | 1727 | 1785 | 6.00044850974  |
| NM_153705    | KDELC2  | 1157 | 1233 | 7.66955021985  |
| NM_153705    | KDELC2  | 775  | 923  | 8.89194264119  |
| NM_153705    | KDELC2  | 1617 | 1727 | 8.08458771913  |
| NM_153705    | KDELC2  | 1245 | 1328 | 7.66955021985  |
| NM_153705    | KDELC2  | 269  | 525  | 9.17205056038  |
| NM_153705    | KDELC2  | 4026 | 4113 | 6.08057011896  |
| NM_153705    | KDELC2  | 1343 | 1419 | 7.08458771913  |
| NM_153702    | ELMOD2  | 737  | 815  | 6.91493354395  |
| NM_153702    | ELMOD2  | 1061 | 1110 | 5.49989604467  |
| NM_153702    | ELMOD2  | 251  | 304  | 5.49989604467  |
| NM_153702    | ELMOD2  | 16   | 85   | 5.91493354394  |
| NM_153702    | ELMOD2  | 1126 | 1173 | 4.91493354373  |
| NM_153702    | ELMOD2  | 326  | 392  | 4.91493354395  |
| NM_153702    | ELMOD2  | 126  | 250  | 7.49989604467  |
| NM_153702    | ELMOD2  | 934  | 1055 | 7.82182413956  |
| NM_153702    | ELMOD2  | 409  | 509  | 7.23686163884  |
| NM_153702    | ELMOD2  | 4067 | 4137 | 3.91091594378  |
| NM_153702    | ELMOD2  | 670  | 715  | 6.23685490778  |
| NM_153702    | ELMOD2  | 519  | 653  | 7.23686163884  |
| NM_153702    | ELMOD2  | 2027 | 2106 | 5.49989604467  |
| NM_153702    | ELMOD2  | 2334 | 2455 | 5.49989604467  |
| NM_153702    | ELMOD2  | 1244 | 1284 | 3.83079433457  |
| NM_153702    | ELMOD2  | 1534 | 1642 | 5.49989604467  |
| NM_153702    | ELMOD2  | 4207 | 4317 | 6.91493354395  |
| NM_153702    | ELMOD2  | 1346 | 1456 | 3.91493354394  |
| NM_153702    | ELMOD2  | 851  | 912  | 5.91493354373  |
| NM_001199125 | COPS3   | 1190 | 1280 | 6.30183893558  |
| NM_001199125 | COPS3   | 861  | 919  | 6.71687643486  |
| NM_001199125 | COPS3   | 534  | 609  | 7.30183893558  |
| NM_001199125 | COPS3   | 623  | 720  | 7.52423135691  |
| NM_001199125 | COPS3   | 1380 | 1508 | 7.30183893558  |
| NM_001199125 | COPS3   | 408  | 533  | 6.71687643486  |
| NM_001199125 | COPS3   | 985  | 1184 | 7.03880452974  |
| NM_001199125 | COPS3   | 128  | 279  | 7.71687643486  |
| NM_198076    | FAM36A  | 918  | 1006 | 1.60263818534  |
| NM_198076    | FAM36A  | 433  | 471  | 0.518498983502 |
| NM_198076    | FAM36A  | 480  | 618  | 3.77256319433  |
| NM_198076    | FAM36A  | 694  | 780  | 2.18760069361  |
| NM_198077    | C1orf52 | 572  | 650  | 4.3428675696   |
| NM_001080424 | KDM6B   | 6201 | 6240 | 8.28315051943  |
| NM_001080424 | KDM6B   | 5892 | 5926 | 8.1990180411   |

|              |        |      |      |               |
|--------------|--------|------|------|---------------|
| NM_001080424 | KDM6B  | 3180 | 3241 | 9.86410215103 |
| NM_001080424 | KDM6B  | 4098 | 4185 | 8.27913965031 |
| NM_001080424 | KDM6B  | 5101 | 5177 | 9.27913965031 |
| NM_001080424 | KDM6B  | 4671 | 4733 | 8.27913965031 |
| NM_006368    | CREB3  | 454  | 511  | 7.3045601547  |
| NM_006368    | CREB3  | 1314 | 1374 | 7.88952938647 |
| NM_006368    | CREB3  | 1127 | 1208 | 6.3045668782  |
| NM_006368    | CREB3  | 891  | 944  | 7.88952937892 |
| NM_006368    | CREB3  | 1520 | 1582 | 7.30456688575 |
| NM_006368    | CREB3  | 382  | 434  | 7.22042767637 |
| NM_006368    | CREB3  | 1032 | 1101 | 7.30456664983 |
| NM_006368    | CREB3  | 672  | 838  | 8.62649498064 |
| NM_006368    | CREB3  | 552  | 662  | 7.88952938647 |
| NM_006369    | LRRC41 | 1857 | 1913 | 7.28062217606 |
| NM_006369    | LRRC41 | 1616 | 1664 | 7.28044842597 |
| NM_006369    | LRRC41 | 649  | 758  | 7.86558467701 |
| NM_006369    | LRRC41 | 1971 | 2103 | 8.86558467701 |
| NM_006369    | LRRC41 | 1251 | 1373 | 8.28062217628 |
| NM_006364    | SEC23A | 69   | 117  | 4.88748091697 |
| NM_006364    | SEC23A | 1842 | 1934 | 6.10987357422 |
| NM_006364    | SEC23A | 699  | 790  | 4.88748115289 |
| NM_006364    | SEC23A | 3495 | 3524 | 3.29850105199 |
| NM_006364    | SEC23A | 1996 | 2068 | 5.30251865217 |
| NM_006364    | SEC23A | 2403 | 2465 | 4.30251864462 |
| NM_006364    | SEC23A | 2080 | 2204 | 6.62444674705 |
| NM_006364    | SEC23A | 2335 | 2379 | 3.29850105199 |
| NM_006364    | SEC23A | 790  | 854  | 4.88748115289 |
| NM_006364    | SEC23A | 1391 | 1547 | 7.20940924777 |
| NM_006364    | SEC23A | 3651 | 3683 | 4.21837944278 |
| NM_006364    | SEC23A | 855  | 994  | 5.30251865217 |
| NM_006364    | SEC23A | 1694 | 1741 | 3.30234490185 |
| NM_006364    | SEC23A | 2474 | 2532 | 4.88748115266 |
| NM_006364    | SEC23A | 2632 | 2700 | 5.30251865194 |
| NM_006364    | SEC23A | 228  | 510  | 7.62444674705 |
| NM_006364    | SEC23A | 515  | 679  | 6.88748115289 |
| NM_006364    | SEC23A | 1192 | 1354 | 6.47244365361 |
| NM_006364    | SEC23A | 1013 | 1173 | 7.10987357422 |
| NM_006366    | CAP2   | 2617 | 2688 | 5.96336647198 |
| NM_006366    | CAP2   | 873  | 943  | 4.95935560286 |
| NM_006366    | CAP2   | 2515 | 2567 | 5.87923399365 |
| NM_006367    | CAP1   | 2093 | 2172 | 4.46432809754 |
| NM_006367    | CAP1   | 1885 | 1958 | 6.04929059826 |
| NM_006367    | CAP1   | 1460 | 1539 | 6.78625619243 |
| NM_006367    | CAP1   | 1233 | 1282 | 6.04929059826 |
| NM_006367    | CAP1   | 1009 | 1107 | 5.78625619243 |
| NM_006367    | CAP1   | 2666 | 2731 | 3.46432809754 |
| NM_006367    | CAP1   | 1553 | 1598 | 5.04929059825 |
| NM_006367    | CAP1   | 2234 | 2308 | 4.46432809753 |
| NM_006367    | CAP1   | 1303 | 1420 | 6.46432809754 |
| NM_006367    | CAP1   | 1115 | 1232 | 5.04929059826 |

|           |        |      |      |               |
|-----------|--------|------|------|---------------|
| NM_006367 | CAP1   | 715  | 1006 | 7.78625619243 |
| NM_006367 | CAP1   | 187  | 345  | 6.63425309898 |
| NM_006367 | CAP1   | 1660 | 1818 | 7.46432809754 |
| NM_006367 | CAP1   | 514  | 663  | 6.78625619243 |
| NM_006367 | CAP1   | 353  | 506  | 5.46432809754 |
| NM_006367 | CAP1   | 2431 | 2665 | 6.63425309898 |
| NM_006360 | EIF3M  | 805  | 865  | 3.96668139376 |
| NM_006360 | EIF3M  | 379  | 430  | 3.37770129287 |
| NM_006360 | EIF3M  | 451  | 497  | 3.96667466271 |
| NM_006360 | EIF3M  | 893  | 1085 | 6.62964640649 |
| NM_006360 | EIF3M  | 119  | 368  | 7.1890738151  |
| NM_006360 | EIF3M  | 614  | 731  | 5.38171889304 |
| NM_006360 | EIF3M  | 511  | 593  | 3.96668139376 |
| NM_006360 | EIF3M  | 1123 | 1254 | 3.38171889304 |
| NM_006362 | NXF1   | 1854 | 1894 | 5.48929003289 |
| NM_006362 | NXF1   | 1067 | 1106 | 4.40916842368 |
| NM_006362 | NXF1   | 1265 | 1310 | 4.49330762551 |
| NM_006362 | NXF1   | 233  | 287  | 5.48929003289 |
| NM_006362 | NXF1   | 1030 | 1065 | 4.40916842368 |
| NM_006362 | NXF1   | 820  | 992  | 6.81523572795 |
| NM_006362 | NXF1   | 1663 | 1777 | 7.49330763306 |
| NM_006362 | NXF1   | 2043 | 2117 | 5.49330763306 |
| NM_006362 | NXF1   | 624  | 762  | 7.30066255512 |
| NM_006362 | NXF1   | 1320 | 1433 | 5.49330763306 |
| NM_006363 | SEC23B | 436  | 538  | 6.43490314689 |
| NM_006363 | SEC23B | 2696 | 2742 | 6.84994064617 |
| NM_006363 | SEC23B | 1227 | 1297 | 6.84994064617 |
| NM_006363 | SEC23B | 2767 | 2815 | 7.43490314689 |
| NM_006363 | SEC23B | 1098 | 1212 | 7.17186874106 |
| NM_006363 | SEC23B | 2850 | 2985 | 7.65729556823 |
| NM_006363 | SEC23B | 3109 | 3154 | 6.43490314667 |
| NM_006363 | SEC23B | 1483 | 1573 | 9.09786815961 |
| NM_006363 | SEC23B | 792  | 873  | 6.84994064617 |
| NM_006363 | SEC23B | 655  | 725  | 6.43490313934 |
| NM_006363 | SEC23B | 880  | 1076 | 8.65729556823 |
| NM_006363 | SEC23B | 2253 | 2404 | 7.65729556823 |
| NM_006363 | SEC23B | 2044 | 2158 | 8.43490314689 |
| NM_006363 | SEC23B | 1632 | 1819 | 8.84994064617 |
| NM_006363 | SEC23B | 1996 | 2036 | 4.76580143679 |
| NM_006363 | SEC23B | 539  | 633  | 8.01986564761 |
| NM_006363 | SEC23B | 2988 | 3096 | 7.17186874106 |
| NM_006363 | SEC23B | 2421 | 2555 | 6.84994064617 |
| NM_006363 | SEC23B | 2561 | 2670 | 5.84994064617 |
| NM_006363 | SEC23B | 1304 | 1422 | 6.84994064617 |
| NM_020750 | XP05   | 3243 | 3292 | 4.91737488917 |
| NM_020750 | XP05   | 1622 | 1676 | 7.92139248934 |
| NM_020750 | XP05   | 3752 | 3804 | 6.50634825901 |
| NM_020750 | XP05   | 2026 | 2091 | 6.50635499006 |
| NM_020750 | XP05   | 3017 | 3065 | 4.92121873902 |
| NM_020750 | XP05   | 2788 | 2826 | 4.91737488917 |

|              |         |      |      |                |
|--------------|---------|------|------|----------------|
| NM_020750    | XP05    | 545  | 579  | 5.92121873902  |
| NM_020750    | XP05    | 3855 | 3939 | 6.50635499006  |
| NM_020750    | XP05    | 2826 | 2918 | 7.92139248934  |
| NM_020750    | XP05    | 3539 | 3657 | 6.92139248934  |
| NM_020750    | XP05    | 3088 | 3160 | 4.92138575829  |
| NM_020750    | XP05    | 2153 | 2214 | 5.91737488917  |
| NM_020750    | XP05    | 2358 | 2466 | 5.92139248934  |
| NM_020750    | XP05    | 2476 | 2546 | 6.92139248912  |
| NM_020750    | XP05    | 1777 | 1974 | 7.50635499006  |
| NM_020750    | XP05    | 1680 | 1729 | 5.92138575829  |
| NM_020750    | XP05    | 824  | 1031 | 7.7287474114   |
| NM_020750    | XP05    | 328  | 534  | 8.50635499006  |
| NM_020750    | XP05    | 1283 | 1514 | 8.09131749079  |
| NM_020750    | XP05    | 2606 | 2767 | 8.09131749079  |
| NM_020750    | XP05    | 1141 | 1281 | 8.09131749079  |
| NM_001622    | AHSG    | 757  | 826  | 0.214571195745 |
| NM_001622    | AHSG    | 1231 | 1562 | 3.36431831525  |
| NM_001622    | AHSG    | 25   | 755  | 4.10938895905  |
| NM_001622    | AHSG    | 893  | 1228 | 2.53649929063  |
| NM_001168401 | BEX2    | 325  | 360  | 11.2780149352  |
| NM_001168401 | BEX2    | 447  | 497  | 10.6930591655  |
| NM_001168401 | BEX2    | 554  | 599  | 12.0149872604  |
| NM_054024    | MIA2    | 644  | 706  | 4.101898266    |
| NM_054024    | MIA2    | 999  | 1091 | 5.10207201631  |
| NM_054024    | MIA2    | 2027 | 2082 | 5.101898266    |
| NM_054024    | MIA2    | 716  | 819  | 5.68703451704  |
| NM_054024    | MIA2    | 1565 | 1638 | 6.10206528527  |
| NM_054024    | MIA2    | 1498 | 1559 | 4.10207201632  |
| NM_054024    | MIA2    | 1918 | 2012 | 6.68703451704  |
| NM_054024    | MIA2    | 205  | 255  | 4.101898266    |
| NM_054024    | MIA2    | 1775 | 1883 | 6.42400011121  |
| NM_054024    | MIA2    | 255  | 318  | 5.10207200877  |
| NM_054024    | MIA2    | 856  | 933  | 5.10207201632  |
| NM_152464    | TMEM199 | 1333 | 1392 | 6.53263324897  |
| NM_001012339 | DNAJC21 | 1821 | 1887 | 4.80329816682  |
| NM_001012339 | DNAJC21 | 1013 | 1031 | 3.71916568849  |
| NM_001166392 | TPBG    | 1827 | 1883 | 13.4020983232  |
| NM_001166392 | TPBG    | 1102 | 1179 | 12.0761526281  |
| NM_001166392 | TPBG    | 456  | 592  | 12.665132729   |
| NM_001166392 | TPBG    | 1292 | 1332 | 10.9960310189  |
| NM_001166392 | TPBG    | 1640 | 1759 | 13.8875251504  |
| NM_001166392 | TPBG    | 1394 | 1485 | 13.0801702283  |
| NM_001098790 | MID1IP1 | 1589 | 1648 | 5.88056494174  |
| NM_001098790 | MID1IP1 | 1487 | 1546 | 6.88458254191  |
| NM_001098790 | MID1IP1 | 1756 | 1838 | 7.46954504263  |
| NM_001626    | AKT2    | 299  | 347  | 5.73195698271  |
| NM_001626    | AKT2    | 2614 | 2651 | 5.81207859192  |
| NM_001626    | AKT2    | 2068 | 2203 | 8.81609619209  |
| NM_001626    | AKT2    | 733  | 805  | 6.73195698271  |
| NM_001626    | AKT2    | 3153 | 3277 | 9.62345111415  |

|              |         |      |      |               |
|--------------|---------|------|------|---------------|
| NM_001626    | AKT2    | 1068 | 1162 | 7.40105869281 |
| NM_001626    | AKT2    | 2765 | 2854 | 7.40105869281 |
| NM_001626    | AKT2    | 1589 | 1638 | 6.81207859192 |
| NM_001626    | AKT2    | 420  | 589  | 8.40105869281 |
| NM_001626    | AKT2    | 1221 | 1353 | 5.81609619209 |
| NM_001626    | AKT2    | 944  | 1026 | 6.81609618454 |
| NM_001626    | AKT2    | 211  | 277  | 5.81207859192 |
| NM_001039753 | EML6    | 7553 | 7600 | 7.79065472132 |
| NM_001627    | ALCAM   | 1947 | 2012 | 6.6553969762  |
| NM_001627    | ALCAM   | 4734 | 4789 | 6.33346864539 |
| NM_001627    | ALCAM   | 3458 | 3485 | 5.33329513099 |
| NM_001627    | ALCAM   | 4077 | 4156 | 6.6553969762  |
| NM_001627    | ALCAM   | 280  | 323  | 5.91843138202 |
| NM_001627    | ALCAM   | 1192 | 1247 | 5.91843114611 |
| NM_001627    | ALCAM   | 3870 | 3906 | 5.24932967192 |
| NM_001627    | ALCAM   | 3996 | 4069 | 7.14082380337 |
| NM_001627    | ALCAM   | 2138 | 2264 | 7.6553969762  |
| NM_001627    | ALCAM   | 1251 | 1430 | 8.6553969762  |
| NM_001627    | ALCAM   | 4620 | 4666 | 5.33346864539 |
| NM_001627    | ALCAM   | 2759 | 2899 | 8.91843138203 |
| NM_001627    | ALCAM   | 2028 | 2067 | 6.33346888131 |
| NM_001627    | ALCAM   | 4529 | 4615 | 5.33346888131 |
| NM_001627    | ALCAM   | 2644 | 2753 | 7.79290049995 |
| NM_001627    | ALCAM   | 370  | 449  | 5.91843137448 |
| NM_001627    | ALCAM   | 3014 | 3096 | 6.91843138203 |
| NM_001627    | ALCAM   | 4240 | 4326 | 6.33346888131 |
| NM_001627    | ALCAM   | 504  | 605  | 5.33346888131 |
| NM_001627    | ALCAM   | 3155 | 3230 | 5.91825763171 |
| NM_001627    | ALCAM   | 4798 | 4890 | 6.91843138203 |
| NM_001627    | ALCAM   | 1684 | 1945 | 9.19144987644 |
| NM_001627    | ALCAM   | 3624 | 3734 | 6.33346888131 |
| NM_001627    | ALCAM   | 1072 | 1189 | 6.6553969762  |
| NM_001627    | ALCAM   | 2266 | 2541 | 9.24035947692 |
| NM_001627    | ALCAM   | 1526 | 1660 | 7.14082380337 |
| NM_001627    | ALCAM   | 677  | 1070 | 9.85703083736 |
| NM_001627    | ALCAM   | 3744 | 3865 | 4.33346864539 |
| NM_014155    | ZBTB44  | 1449 | 1535 | 6.88900165272 |
| NM_014153    | ZC3H7A  | 1737 | 1801 | 4.47143837592 |
| NM_014153    | ZC3H7A  | 2291 | 2327 | 4.39131676671 |
| NM_014153    | ZC3H7A  | 2675 | 2765 | 5.47545596854 |
| NM_014153    | ZC3H7A  | 2381 | 2434 | 4.47143837592 |
| NM_014153    | ZC3H7A  | 2563 | 2607 | 4.47143837592 |
| NM_014153    | ZC3H7A  | 3516 | 3565 | 6.06024472649 |
| NM_014153    | ZC3H7A  | 3697 | 3759 | 4.47545596854 |
| NM_014153    | ZC3H7A  | 140  | 229  | 6.06041847681 |
| NM_014153    | ZC3H7A  | 991  | 1102 | 6.79738407098 |
| NM_005866    | SIGMAR1 | 1053 | 1152 | 5.90580857616 |
| NM_005866    | SIGMAR1 | 357  | 418  | 8.71316350577 |
| NM_005866    | SIGMAR1 | 1638 | 1708 | 5.90580858371 |
| NM_005866    | SIGMAR1 | 860  | 930  | 7.90580858371 |



|           |          |      |      |                    |
|-----------|----------|------|------|--------------------|
| NM_005866 | SIGMAR1  | 169  | 246  | 8.49077108443      |
| NM_005866 | SIGMAR1  | 247  | 333  | 8.90580858371      |
| NM_005866 | SIGMAR1  | 678  | 839  | 9.07573358515      |
| NM_005866 | SIGMAR1  | 1192 | 1229 | 6.90580834779      |
| NM_005866 | SIGMAR1  | 947  | 1053 | 7.90580858371      |
| NM_005866 | SIGMAR1  | 576  | 650  | 7.90580858371      |
| NM_005866 | SIGMAR1  | 426  | 540  | 8.22773667859      |
| NM_005862 | STAG1    | 874  | 928  | 8.20499429774      |
| NM_005862 | STAG1    | 2654 | 2700 | 7.79012381772      |
| NM_005862 | STAG1    | 1107 | 1167 | 6.12102883867      |
| NM_005862 | STAG1    | 3157 | 3209 | 7.12102883867      |
| NM_005862 | STAG1    | 1744 | 1805 | 7.12102883867      |
| NM_005862 | STAG1    | 3912 | 3992 | 7.20115044788      |
| NM_014159 | SETD2    | 7686 | 7761 | 6.39278516909      |
| NM_014159 | SETD2    | 8058 | 8118 | 4.80782266837      |
| NM_014159 | SETD2    | 3139 | 3195 | 6.30881971003      |
| NM_005860 | FSTL3    | 662  | 705  | 10.8496492946      |
| NM_005860 | FSTL3    | 898  | 974  | 11.2687043941      |
| NM_005860 | FSTL3    | 1247 | 1296 | 10.2687043865      |
| NM_005860 | FSTL3    | 782  | 835  | 10.2687041581      |
| NM_005860 | FSTL3    | 1151 | 1199 | 10.2646867939      |
| NM_005860 | FSTL3    | 1417 | 1462 | 9.26853064374      |
| NM_005860 | FSTL3    | 275  | 323  | 10.8536666589      |
| NM_005860 | FSTL3    | 1465 | 1510 | 9.26853064374      |
| NM_005861 | STUB1    | 1411 | 1474 | 6.3469468713       |
| NM_005861 | STUB1    | 572  | 637  | 5.6778451612       |
| NM_018327 | SPTLC3   | 1814 | 1883 | 6.08100638585      |
| NM_018327 | SPTLC3   | 908  | 993  | 5.08100638585      |
| NM_015203 | RPRD2    | 1958 | 2007 | 7.82862344114      |
| NM_015203 | RPRD2    | 1343 | 1423 | 7.83246729099      |
| NM_015203 | RPRD2    | 1178 | 1224 | 9.15439538588      |
| NM_015203 | RPRD2    | 2532 | 2586 | 6.83264080539      |
| NM_015203 | RPRD2    | 1255 | 1338 | 8.83264104131      |
| NM_015203 | RPRD2    | 370  | 413  | 7.83246729099      |
| NM_015203 | RPRD2    | 4604 | 4687 | 7.8326410413       |
| NM_015203 | RPRD2    | 2854 | 2943 | 8.41760353448      |
| NM_015203 | RPRD2    | 420  | 492  | 8.41358594186      |
| NM_015202 | KIAA0556 |      | 1726 | 1770 8.83818644396 |
| NM_015201 | BOP1     | 385  | 475  | 6.74606936791      |
| NM_015201 | BOP1     | 539  | 636  | 7.74606936791      |
| NM_015201 | BOP1     | 117  | 285  | 7.74606936791      |
| NM_015201 | BOP1     | 309  | 349  | 5.74205176773      |
| NM_015201 | BOP1     | 1131 | 1238 | 5.74606936791      |
| NM_015201 | BOP1     | 1404 | 1547 | 5.74606936791      |
| NM_015201 | BOP1     | 1310 | 1392 | 6.74606936791      |
| NM_015201 | BOP1     | 672  | 747  | 7.74606936791      |
| NM_015201 | BOP1     | 2031 | 2090 | 5.74205176773      |
| NM_018320 | RNF121   | 627  | 719  | 9.67907965518      |
| NM_018320 | RNF121   | 775  | 818  | 7.86770713295      |
| NM_018320 | RNF121   | 961  | 1188 | 8.87172473312      |

|              |          |      |      |               |               |
|--------------|----------|------|------|---------------|---------------|
| NM_018639    | WSB2     | 2233 | 2296 | 6.6180606296  |               |
| NM_018639    | WSB2     | 284  | 350  | 6.618234144   |               |
| NM_018639    | WSB2     | 1028 | 1086 | 5.6182343797  |               |
| NM_018639    | WSB2     | 1629 | 1678 | 7.20319688063 |               |
| NM_018639    | WSB2     | 1086 | 1144 | 7.20319688064 |               |
| NM_018639    | WSB2     | 946  | 1002 | 5.6182343797  |               |
| NM_018639    | WSB2     | 528  | 609  | 5.6182343797  |               |
| NM_018639    | WSB2     | 180  | 232  | 6.53409517053 |               |
| NM_018639    | WSB2     | 1849 | 1925 | 5.618234144   |               |
| NM_018639    | WSB2     | 614  | 724  | 6.61823437992 |               |
| NM_002480    | PPP1R12A |      | 3577 | 3653          | 5.67532927274 |
| NM_002480    | PPP1R12A |      | 5085 | 5139          | 6.17615929513 |
| NM_002480    | PPP1R12A |      | 4102 | 4149          | 5.67533600357 |
| NM_002480    | PPP1R12A |      | 2220 | 2287          | 4.59119679441 |
| NM_002483    | CEACAM6  | 482  | 531  | 12.6995850993 |               |
| NM_002482    | NASP     | 1793 | 1852 | 4.33394394576 |               |
| NM_002482    | NASP     | 2273 | 2335 | 3.74897471399 |               |
| NM_002482    | NASP     | 2063 | 2112 | 2.74496384487 |               |
| NM_002482    | NASP     | 2117 | 2186 | 4.74898144505 |               |
| NM_002482    | NASP     | 1648 | 1729 | 5.07090953993 |               |
| NM_002482    | NASP     | 673  | 693  | 2.66484223566 |               |
| NM_002482    | NASP     | 1976 | 2063 | 5.07090953993 |               |
| NM_002482    | NASP     | 255  | 348  | 5.07090953993 |               |
| NM_002485    | NBN      | 179  | 282  | 7.92332554511 |               |
| NM_002484    | NUBP1    | 527  | 624  | 3.85820363864 |               |
| NM_002486    | NCBP1    | 2629 | 2687 | 5.81663539566 |               |
| NM_002486    | NCBP1    | 817  | 881  | 6.81663538834 |               |
| NM_002486    | NCBP1    | 1062 | 1117 | 6.81646164557 |               |
| NM_002486    | NCBP1    | 1861 | 1910 | 6.81663515997 |               |
| NM_002486    | NCBP1    | 2292 | 2382 | 9.27606701452 |               |
| NM_002486    | NCBP1    | 2508 | 2571 | 7.40159788906 |               |
| NM_002486    | NCBP1    | 2043 | 2148 | 7.40159766069 |               |
| NM_002486    | NCBP1    | 2415 | 2495 | 6.81646164557 |               |
| NM_002486    | NCBP1    | 897  | 998  | 7.40159766069 |               |
| NM_002486    | NCBP1    | 1133 | 1203 | 5.81662866483 |               |
| NM_002486    | NCBP1    | 1922 | 2023 | 6.81663539589 |               |
| NM_002489    | NDUFA4   | 468  | 525  | 5.31321352877 |               |
| NM_002489    | NDUFA4   | 28   | 450  | 8.50585860671 |               |
| NM_002488    | NDUFA2   | 403  | 453  | 7.15467856506 |               |
| NM_002488    | NDUFA2   | 458  | 507  | 9.15467206993 |               |
| NM_031904    | FRMD8    | 643  | 698  | 9.13954966982 |               |
| NM_031904    | FRMD8    | 398  | 462  | 10.2236821482 |               |
| NM_031904    | FRMD8    | 1842 | 1889 | 9.22368887166 |               |
| NM_031904    | FRMD8    | 2573 | 2632 | 10.2235151289 |               |
| NM_031904    | FRMD8    | 1243 | 1296 | 10.8046337798 |               |
| NM_001025091 | ABCF1    | 1726 | 1789 | 3.68499607916 |               |
| NM_001025091 | ABCF1    | 2543 | 2602 | 4.68499607917 |               |
| NM_001025091 | ABCF1    | 2447 | 2482 | 5.26995857989 |               |
| NM_001025091 | ABCF1    | 2327 | 2434 | 6.26995857989 |               |
| NM_001025091 | ABCF1    | 1908 | 1948 | 4.60085686979 |               |

|              |        |      |      |               |
|--------------|--------|------|------|---------------|
| NM_001025091 | ABCF1  | 2759 | 2871 | 7.14442769781 |
| NM_001025091 | ABCF1  | 1380 | 1437 | 4.68499584325 |
| NM_001025091 | ABCF1  | 2922 | 2984 | 5.68499607917 |
| NM_001025091 | ABCF1  | 3010 | 3065 | 5.26995857989 |
| NM_001025091 | ABCF1  | 979  | 1118 | 6.00692417406 |
| NM_001025091 | ABCF1  | 3256 | 3319 | 4.68482232885 |
| NM_001025091 | ABCF1  | 2662 | 2741 | 5.26995857989 |
| NM_001025091 | ABCF1  | 1118 | 1268 | 6.26995857989 |
| NM_001025091 | ABCF1  | 1976 | 2170 | 6.85492108061 |
| NM_001025091 | ABCF1  | 1532 | 1623 | 5.68499607917 |
| NM_031903    | MRPL32 | 53   | 129  | 4.08035344437 |
| NM_031903    | MRPL32 | 674  | 836  | 6.53978506301 |
| NM_031903    | MRPL32 | 489  | 608  | 3.08035344437 |
| NM_031903    | MRPL32 | 223  | 476  | 6.98724403998 |
| NM_001170687 | MIB2   | 1362 | 1422 | 6.24302248837 |
| NM_001170687 | MIB2   | 1200 | 1267 | 6.24302248837 |
| NM_001130158 | MY01B  | 1972 | 2039 | 6.06576955643 |
| NM_001130158 | MY01B  | 2445 | 2484 | 6.48080705571 |
| NM_001130158 | MY01B  | 1735 | 1781 | 7.28816197777 |
| NM_001130158 | MY01B  | 2768 | 2824 | 6.48080705571 |
| NM_001130158 | MY01B  | 4682 | 4738 | 5.48080705571 |
| NM_001130158 | MY01B  | 2609 | 2685 | 4.47678945554 |
| NM_001130158 | MY01B  | 860  | 915  | 7.28816197777 |
| NM_001130158 | MY01B  | 942  | 1083 | 8.38769765132 |
| NM_001130158 | MY01B  | 1384 | 1514 | 7.8027351506  |
| NM_001130158 | MY01B  | 4752 | 4794 | 4.47678945554 |
| NM_001130158 | MY01B  | 3360 | 3402 | 4.39666784633 |
| NM_001130158 | MY01B  | 4106 | 4140 | 4.48063330539 |
| NM_001130158 | MY01B  | 2294 | 2387 | 6.8027351506  |
| NM_001130158 | MY01B  | 1191 | 1236 | 6.06559580612 |
| NM_001130158 | MY01B  | 1251 | 1323 | 6.8027351506  |
| NM_001130158 | MY01B  | 1798 | 1857 | 5.47678945554 |
| NM_001130158 | MY01B  | 4176 | 4277 | 5.48080705571 |
| NM_001130158 | MY01B  | 2486 | 2596 | 6.8027351506  |
| NM_001130158 | MY01B  | 1528 | 1713 | 8.06576955643 |
| NM_001130158 | MY01B  | 457  | 592  | 7.65073205716 |
| NM_001130158 | MY01B  | 2696 | 2749 | 5.48080705549 |
| NM_001130158 | MY01B  | 3827 | 3959 | 7.06576955643 |
| NM_001130158 | MY01B  | 2076 | 2184 | 6.06576955643 |
| NM_001130158 | MY01B  | 3125 | 3332 | 7.06576955643 |
| NM_001130158 | MY01B  | 3459 | 3784 | 8.48080705571 |
| NM_001130158 | MY01B  | 692  | 851  | 7.06576955643 |
| NM_001130158 | MY01B  | 274  | 315  | 5.47678945554 |
| NM_033055    | HIAT1  | 969  | 1034 | 7.68752614528 |
| NM_033055    | HIAT1  | 509  | 580  | 7.68752614528 |
| NM_033055    | HIAT1  | 1284 | 1366 | 8.49488106734 |
| NM_033055    | HIAT1  | 200  | 239  | 6.68751941423 |
| NM_033055    | HIAT1  | 353  | 503  | 9.38796586342 |
| NM_033055    | HIAT1  | 3    | 179  | 8.272488646   |
| NM_033055    | HIAT1  | 1522 | 1624 | 7.27248863845 |

|              |          |      |      |               |               |
|--------------|----------|------|------|---------------|---------------|
| NM_033055    | HIAT1    | 1046 | 1283 | 8.68752614528 |               |
| NM_006233    | POLR2I   | 458  | 500  | 5.16549269597 |               |
| NM_006233    | POLR2I   | 604  | 676  | 5.83459440608 |               |
| NM_006233    | POLR2I   | 523  | 586  | 5.24963166944 |               |
| NM_004650    | PNPLA4   | 715  | 780  | 7.117759189   |               |
| NM_152308    | RMI2     | 1268 | 1322 | 7.80430216799 |               |
| NM_152308    | RMI2     | 1201 | 1266 | 7.80028457536 |               |
| NM_005131    | THOC1    | 314  | 371  | 6.4351611535  |               |
| NM_001195071 | TMEM184B |      | 1416 | 1478          | 8.77184158498 |
| NM_001195071 | TMEM184B |      | 657  | 752           | 11.3568108168 |
| NM_001195071 | TMEM184B |      | 1561 | 1616          | 8.77184830848 |
| NM_001195071 | TMEM184B |      | 3420 | 3476          | 8.76783071586 |
| NM_001195071 | TMEM184B |      | 1099 | 1140          | 9.68770910665 |
| NM_001195071 | TMEM184B |      | 960  | 1021          | 8.77184830848 |
| NM_001195071 | TMEM184B |      | 2902 | 2942          | 8.77167456571 |
| NM_001195071 | TMEM184B |      | 2192 | 2238          | 8.68770910665 |
| NM_001195071 | TMEM184B |      | 1856 | 1954          | 10.771848316  |
| NM_001195071 | TMEM184B |      | 3478 | 3574          | 8.77184831603 |
| NM_001195071 | TMEM184B |      | 464  | 623           | 10.771848316  |
| NM_005133    | RCE1     | 1022 | 1114 | 8.68119502932 |               |
| NM_005133    | RCE1     | 1277 | 1341 | 8.6811950291  |               |
| NM_005133    | RCE1     | 377  | 488  | 9.68119502932 |               |
| NM_005133    | RCE1     | 517  | 625  | 9.41816062348 |               |
| NM_005133    | RCE1     | 897  | 990  | 9.41816062348 |               |
| NM_005133    | RCE1     | 251  | 333  | 9.0962325286  |               |
| NM_005133    | RCE1     | 717  | 839  | 10.6811950293 |               |
| NM_005133    | RCE1     | 1129 | 1205 | 8.68119502177 |               |
| NM_005134    | PPP4R1   | 740  | 807  | 7.45780406646 |               |
| NM_005134    | PPP4R1   | 1242 | 1322 | 8.19477639168 |               |
| NM_005134    | PPP4R1   | 2556 | 2643 | 7.87284829679 |               |
| NM_005134    | PPP4R1   | 2730 | 2789 | 6.86883069662 |               |
| NM_005134    | PPP4R1   | 3477 | 3545 | 7.37367158813 |               |
| NM_005134    | PPP4R1   | 2395 | 2443 | 7.45781078996 |               |
| NM_005134    | PPP4R1   | 2151 | 2228 | 5.87267454647 |               |
| NM_005134    | PPP4R1   | 199  | 262  | 5.87284829657 |               |
| NM_005134    | PPP4R1   | 1945 | 1995 | 5.87284156574 |               |
| NM_005134    | PPP4R1   | 2038 | 2132 | 7.45781079751 |               |
| NM_005134    | PPP4R1   | 1873 | 1944 | 5.86883069662 |               |
| NM_005134    | PPP4R1   | 1806 | 1865 | 5.78870908741 |               |
| NM_005134    | PPP4R1   | 2230 | 2285 | 6.78870908741 |               |
| NM_005134    | PPP4R1   | 3604 | 3677 | 7.45781079729 |               |
| NM_005135    | SLC12A6  | 1198 | 1273 | 8.91558619534 |               |
| NM_005135    | SLC12A6  | 3538 | 3621 | 6.59365160532 |               |
| NM_005135    | SLC12A6  | 2025 | 2094 | 8.59365833637 |               |
| NM_005135    | SLC12A6  | 2138 | 2196 | 8.17862060118 |               |
| NM_005135    | SLC12A6  | 1477 | 1523 | 6.59365160532 |               |
| NM_005135    | SLC12A6  | 2347 | 2394 | 8.17862060118 |               |
| NM_005135    | SLC12A6  | 2629 | 2682 | 8.09448162771 |               |
| NM_005135    | SLC12A6  | 1789 | 1863 | 7.59348458606 |               |
| NM_005135    | SLC12A6  | 4528 | 4563 | 7.50951912699 |               |

|              |          |      |      |                  |
|--------------|----------|------|------|------------------|
| NM_005135    | SLC12A6  | 370  | 411  | 7.5896407362     |
| NM_005135    | SLC12A6  | 1982 | 2024 | 6.50951912699    |
| NM_005135    | SLC12A6  | 6109 | 6138 | 6.59365832882    |
| NM_005135    | SLC12A6  | 648  | 743  | 8.17862083709    |
| NM_005135    | SLC12A6  | 1083 | 1188 | 6.59365833615    |
| NM_001005739 | VPS54    | 2484 | 2552 | 3.36254135817    |
| NM_001005739 | VPS54    | 1949 | 1992 | 4.358523758      |
| NM_001005739 | VPS54    | 3469 | 3519 | 4.94749712784    |
| NM_001005739 | VPS54    | 1046 | 1099 | 4.36254135795    |
| NM_001005739 | VPS54    | 1146 | 1214 | 4.94348625872    |
| NM_001005739 | VPS54    | 2222 | 2266 | 4.27840214879    |
| NM_001005739 | VPS54    | 61   | 102  | 3.27840214879    |
| NM_001005739 | VPS54    | 3087 | 3178 | 4.94750385889    |
| NM_001005739 | VPS54    | 758  | 896  | 4.36254135817    |
| NM_005138    | SC02     | 695  | 729  | 6.5309873522     |
| NM_005139    | ANXA3    | 955  | 1038 | 9.67343236656    |
| NM_005139    | ANXA3    | 649  | 706  | 8.35150426412    |
| NM_005139    | ANXA3    | 387  | 455  | 9.35150427167    |
| NM_005139    | ANXA3    | 1189 | 1280 | 9.35150427167    |
| NM_005139    | ANXA3    | 1149 | 1189 | 8.93646004134    |
| NM_005139    | ANXA3    | 296  | 383  | 8.35150427167    |
| NM_005139    | ANXA3    | 708  | 794  | 9.35150427167    |
| NM_005139    | ANXA3    | 1039 | 1141 | 8.93646677239    |
| NM_015533    | DAK      | 927  | 998  | 4.95227938127    |
| NM_015533    | DAK      | 192  | 242  | 4.94826178109    |
| NM_015533    | DAK      | 1584 | 1640 | 4.86814017188    |
| NM_152945    | RBM45    | 1385 | 1471 | 8.5853057542     |
| NM_177552    | SULT1A3  | 566  | 616  | 5.32713239813    |
| NM_177552    | SULT1A3  | 780  | 859  | 4.33114976239    |
| NM_177552    | SULT1A3  | 908  | 1054 | 6.91611249903    |
| NM_001909    | CTSD     | 109  | 500  | 8.02714547619    |
| NM_001909    | CTSD     | 1978 | 2117 | 5.24953789753    |
| NM_001909    | CTSD     | 501  | 699  | 6.69011048891    |
| NM_001909    | CTSD     | 1722 | 1978 | 5.61210797691    |
| NM_001909    | CTSD     | 1460 | 1692 | 7.76411107036    |
| NM_001909    | CTSD     | 702  | 1382 | 8.70896951617    |
| NM_015537    | NELF     | 1391 | 1469 | 4.0807274852     |
| NM_015537    | NELF     | 776  | 827  | 5.07670989258    |
| NM_015537    | NELF     | 1708 | 1774 | 5.66568999347    |
| NM_015537    | NELF     | 1174 | 1252 | 4.0807274852     |
| NM_015537    | NELF     | 2955 | 3017 | 4.07670989258    |
| NM_001109938 | C6orf136 |      | 835  | 898 7.7398952227 |
| NM_001905    | CTPS     | 1843 | 1932 | 7.80674259626    |
| NM_001905    | CTPS     | 985  | 1049 | 6.80656884594    |
| NM_001905    | CTPS     | 2379 | 2436 | 5.80272499608    |
| NM_001905    | CTPS     | 2909 | 2951 | 6.80272499608    |
| NM_001905    | CTPS     | 1207 | 1260 | 7.80674259603    |
| NM_001905    | CTPS     | 1496 | 1562 | 6.80674259625    |
| NM_001905    | CTPS     | 2856 | 2907 | 6.72260338687    |
| NM_001905    | CTPS     | 1433 | 1495 | 6.80272499608    |

|           |        |      |      |               |
|-----------|--------|------|------|---------------|
| NM_001905 | CTPS   | 2438 | 2526 | 8.39170509698 |
| NM_001905 | CTPS   | 871  | 978  | 7.80674259626 |
| NM_001905 | CTPS   | 1948 | 2048 | 7.39170509698 |
| NM_001905 | CTPS   | 1346 | 1421 | 7.39170509697 |
| NM_001905 | CTPS   | 2160 | 2377 | 9.5071823144  |
| NM_001905 | CTPS   | 1080 | 1161 | 8.12867069114 |
| NM_001905 | CTPS   | 3119 | 3191 | 5.8067358652  |
| NM_001905 | CTPS   | 1644 | 1737 | 7.80674259626 |
| NM_001905 | CTPS   | 1569 | 1640 | 7.72260338687 |
| NM_001905 | CTPS   | 2597 | 2737 | 8.12867069114 |
| NM_012265 | RHBDD3 | 1053 | 1151 | 11.0325837048 |
| NM_012265 | RHBDD3 | 818  | 887  | 9.03258370479 |
| NM_012265 | RHBDD3 | 1445 | 1497 | 9.94844449541 |
| NM_012265 | RHBDD3 | 196  | 318  | 10.6175462055 |
| NM_001901 | CTGF   | 201  | 298  | 2.82025152855 |
| NM_001901 | CTGF   | 1502 | 1537 | 2.81623392837 |
| NM_001901 | CTGF   | 33   | 64   | 2.73611231916 |
| NM_001901 | CTGF   | 2226 | 2261 | 2.81623392837 |
| NM_001901 | CTGF   | 312  | 386  | 1.73611231916 |
| NM_001901 | CTGF   | 680  | 803  | 4.14217962343 |
| NM_001901 | CTGF   | 2112 | 2172 | 3.40520729821 |
| NM_001901 | CTGF   | 1119 | 1322 | 6.46410771832 |
| NM_001901 | CTGF   | 1918 | 2035 | 4.14217962343 |
| NM_001901 | CTGF   | 895  | 1091 | 4.99017652999 |
| NM_001901 | CTGF   | 578  | 668  | 3.82025152855 |
| NM_001901 | CTGF   | 1604 | 1806 | 4.99017652999 |
| NM_001901 | CTGF   | 387  | 494  | 4.14217962343 |
| NM_004420 | DUSP8  | 766  | 833  | 9.65288696816 |
| NM_004420 | DUSP8  | 1236 | 1313 | 8.98378525806 |
| NM_004420 | DUSP8  | 893  | 939  | 8.06390686727 |
| NM_004420 | DUSP8  | 846  | 892  | 8.06390686727 |
| NM_004420 | DUSP8  | 3526 | 3649 | 8.06792446745 |
| NM_004420 | DUSP8  | 626  | 677  | 8.06792446722 |
| NM_004423 | DVL3   | 2724 | 2761 | 4.85087720144 |
| NM_004423 | DVL3   | 4603 | 4673 | 5.85105095175 |
| NM_004423 | DVL3   | 939  | 1017 | 5.85105095175 |
| NM_004423 | DVL3   | 4401 | 4484 | 8.17297904664 |
| NM_004423 | DVL3   | 2563 | 2599 | 4.84703335158 |
| NM_004423 | DVL3   | 847  | 937  | 7.17297904664 |
| NM_004423 | DVL3   | 2322 | 2404 | 6.43601345248 |
| NM_004423 | DVL3   | 271  | 334  | 4.85105095175 |
| NM_004423 | DVL3   | 1561 | 1656 | 6.85105095175 |
| NM_004423 | DVL3   | 1093 | 1164 | 5.85087720144 |
| NM_004423 | DVL3   | 4305 | 4378 | 7.17297904642 |
| NM_004423 | DVL3   | 3358 | 3384 | 4.84703335158 |
| NM_004423 | DVL3   | 1424 | 1514 | 4.85087720144 |
| NM_004423 | DVL3   | 4827 | 5026 | 7.65840587381 |
| NM_004423 | DVL3   | 3972 | 4085 | 4.85105095175 |
| NM_004422 | DVL2   | 525  | 580  | 6.16586491282 |
| NM_004422 | DVL2   | 1203 | 1298 | 7.75100116386 |

|              |         |       |       |               |
|--------------|---------|-------|-------|---------------|
| NM_201453    | CBWD3   | 722   | 791   | 6.29133853484 |
| NM_201453    | CBWD3   | 533   | 569   | 6.79216182617 |
| NM_201453    | CBWD3   | 986   | 1055  | 7.29133853484 |
| NM_201453    | CBWD3   | 351   | 422   | 6.29133852729 |
| NM_201453    | CBWD3   | 794   | 875   | 7.29133852729 |
| NM_201453    | CBWD3   | 422   | 512   | 6.29133852729 |
| NM_201453    | CBWD3   | 228   | 335   | 5.29133853484 |
| NM_201453    | CBWD3   | 18    | 205   | 8.09869345689 |
| NM_133433    | NIPBL   | 5918  | 5991  | 6.03457947743 |
| NM_133433    | NIPBL   | 5712  | 5815  | 7.03457947743 |
| NM_133433    | NIPBL   | 7762  | 7801  | 7.35650084126 |
| NM_133433    | NIPBL   | 260   | 308   | 6.03457274637 |
| NM_133433    | NIPBL   | 4112  | 4182  | 6.03457947743 |
| NM_133433    | NIPBL   | 7120  | 7196  | 6.03457924151 |
| NM_133433    | NIPBL   | 7624  | 7672  | 4.95044026804 |
| NM_133433    | NIPBL   | 1246  | 1299  | 7.03457274637 |
| NM_133433    | NIPBL   | 413   | 461   | 5.03457924151 |
| NM_133433    | NIPBL   | 7244  | 7285  | 5.03457274637 |
| NM_133433    | NIPBL   | 6315  | 6355  | 4.95044026804 |
| NM_133433    | NIPBL   | 5519  | 5582  | 5.03056187725 |
| NM_133433    | NIPBL   | 3222  | 3268  | 5.03056187725 |
| NM_133433    | NIPBL   | 8147  | 8217  | 6.03457274637 |
| NM_133433    | NIPBL   | 8984  | 9040  | 4.95044026804 |
| NM_133433    | NIPBL   | 9106  | 9183  | 6.03440572711 |
| NM_133433    | NIPBL   | 6933  | 7034  | 6.61954197815 |
| NM_133433    | NIPBL   | 3012  | 3075  | 6.03457274637 |
| NM_133433    | NIPBL   | 2128  | 2243  | 6.03457947743 |
| NM_015284    | SZT2    | 10186 | 10260 | 9.79163777    |
| NM_015284    | SZT2    | 1498  | 1586  | 9.70767231093 |
| NM_015284    | SZT2    | 789   | 856   | 9.79163777    |
| NM_001135917 | DOLPP1  | 77    | 128   | 7.21035574416 |
| NM_001135917 | DOLPP1  | 16    | 72    | 9.53228406742 |
| NM_001135917 | DOLPP1  | 1482  | 1566  | 8.7953184808  |
| NM_001135917 | DOLPP1  | 150   | 195   | 7.21018222977 |
| NM_001135917 | DOLPP1  | 1252  | 1362  | 9.53228407497 |
| NM_001135917 | DOLPP1  | 333   | 499   | 9.53228407497 |
| NM_001135917 | DOLPP1  | 658   | 742   | 7.21035598008 |
| NM_182776    | MCM7    | 2094  | 2199  | 7.12228826454 |
| NM_182776    | MCM7    | 1839  | 1974  | 7.23776548196 |
| NM_182776    | MCM7    | 2363  | 2842  | 9.37021577798 |
| NM_182776    | MCM7    | 2860  | 2963  | 4.53732576382 |
| NM_182776    | MCM7    | 1451  | 1831  | 8.62478860507 |
| NM_182776    | MCM7    | 2232  | 2353  | 6.53732576382 |
| NM_182776    | MCM7    | 984   | 1443  | 9.0919146155  |
| NM_182776    | MCM7    | 2005  | 2086  | 5.12228826454 |
| NM_182776    | MCM7    | 571   | 933   | 8.62478860507 |
| NM_006955    | ZNF33B  | 159   | 232   | 7.69058763944 |
| NM_006954    | ZNF33A  | 3259  | 3305  | 8.39209427464 |
| NM_030974    | SHARPIN | 1153  | 1219  | 7.33004119909 |
| NM_030971    | SFXN3   | 2631  | 2701  | 8.41810702853 |

|              |          |      |      |               |               |
|--------------|----------|------|------|---------------|---------------|
| NM_030973    | MED25    | 198  | 252  | 7.06189102432 |               |
| NM_030973    | MED25    | 108  | 159  | 8.64283593242 |               |
| NM_030973    | MED25    | 474  | 579  | 8.06189103187 |               |
| NM_030973    | MED25    | 1587 | 1670 | 7.06189103187 |               |
| NM_030978    | ARPC5L   | 120  | 154  | 3.94342676914 |               |
| NM_030978    | ARPC5L   | 243  | 311  | 3.94360028354 |               |
| NM_030978    | ARPC5L   | 332  | 412  | 5.52856302018 |               |
| NM_030978    | ARPC5L   | 722  | 789  | 5.52856302018 |               |
| NM_030978    | ARPC5L   | 556  | 686  | 5.94360051946 |               |
| NM_030979    | PABPC3   | 576  | 624  | 5.04655855658 |               |
| NM_030979    | PABPC3   | 634  | 743  | 6.04655855658 |               |
| NM_030979    | PABPC3   | 947  | 1000 | 5.6315210573  |               |
| NM_030979    | PABPC3   | 1099 | 1188 | 5.46159605585 |               |
| NM_030979    | PABPC3   | 751  | 793  | 5.46159605585 |               |
| NM_030979    | PABPC3   | 1332 | 1389 | 4.46159605585 |               |
| NM_030979    | PABPC3   | 1784 | 1823 | 4.46159605585 |               |
| NM_030979    | PABPC3   | 1046 | 1088 | 5.6315210573  |               |
| NM_030979    | PABPC3   | 1834 | 1912 | 5.04655855658 |               |
| NM_030979    | PABPC3   | 260  | 341  | 4.46159605585 |               |
| NM_030979    | PABPC3   | 1427 | 1459 | 3.4615893248  |               |
| NM_030979    | PABPC3   | 478  | 526  | 2.37745684647 |               |
| NM_030979    | PABPC3   | 876  | 927  | 2.45757845568 |               |
| NM_030979    | PABPC3   | 392  | 438  | 2.45757845568 |               |
| NM_005830    | MRPS31   | 1063 | 1112 | 4.56551349073 |               |
| NM_001005408 | NEURL4   | 653  | 721  | 9.35099011094 |               |
| NM_001005408 | NEURL4   | 4092 | 4116 | 8.26685763261 |               |
| NM_001005408 | NEURL4   | 1801 | 1861 | 9.35099683445 |               |
| NM_001128144 | PMS1     | 1364 | 1425 | 5.37465427169 |               |
| NM_001128144 | PMS1     | 548  | 620  | 5.37465427169 |               |
| NM_001128144 | PMS1     | 2703 | 2759 | 5.37465427169 |               |
| NM_001128144 | PMS1     | 2621 | 2680 | 5.37064340257 |               |
| NM_001128144 | PMS1     | 2390 | 2454 | 5.37064340257 |               |
| NM_139156    | AMPD2    | 1281 | 1313 | 5.38635878184 |               |
| NM_139156    | AMPD2    | 3607 | 3693 | 6.97533888251 |               |
| NM_139156    | AMPD2    | 1731 | 1802 | 6.39037638201 |               |
| NM_139156    | AMPD2    | 1106 | 1170 | 5.39037638179 |               |
| NM_139156    | AMPD2    | 1618 | 1675 | 5.30623717263 |               |
| NM_139156    | AMPD2    | 748  | 811  | 6.97533888273 |               |
| NM_139156    | AMPD2    | 2468 | 2528 | 6.97533888273 |               |
| NM_139156    | AMPD2    | 2036 | 2114 | 5.39037614609 |               |
| NM_139156    | AMPD2    | 1010 | 1093 | 6.38635878184 |               |
| NM_139156    | AMPD2    | 2940 | 3038 | 6.97533888273 |               |
| NM_139156    | AMPD2    | 1885 | 1985 | 6.97533864682 |               |
| NM_001146189 | ZNF407   | 4390 | 4431 | 9.69978861612 |               |
| NM_020239    | CDC42SE1 |      | 1342 | 1390          | 8.91732972682 |
| NM_020239    | CDC42SE1 |      | 2786 | 2908          | 9.0014689362  |
| NM_020239    | CDC42SE1 |      | 1236 | 1311          | 11.1713939376 |
| NM_020239    | CDC42SE1 |      | 1884 | 1969          | 9.58643143693 |
| NM_020239    | CDC42SE1 |      | 496  | 569           | 8.00129518589 |
| NM_020239    | CDC42SE1 |      | 830  | 875           | 8.99745133603 |



|              |              |      |     |               |
|--------------|--------------|------|-----|---------------|
| NM_020239    | CDC42SE1     | 188  | 269 | 8.00146892865 |
| NM_020239    | CDC42SE1     | 96   | 187 | 8.00146220515 |
| NM_001636    | SLC25A6 417  | 490  |     | 4.12005448334 |
| NM_001636    | SLC25A6 508  | 622  |     | 5.12005449089 |
| NM_001636    | SLC25A6 686  | 743  |     | 4.12005449066 |
| NM_001636    | SLC25A6 759  | 806  |     | 2.53509198994 |
| NM_001636    | SLC25A6 264  | 315  |     | 3.53508525911 |
| NM_001636    | SLC25A6 835  | 938  |     | 4.85702008505 |
| NM_001636    | SLC25A6 359  | 396  |     | 2.45095278078 |
| NM_001636    | SLC25A6 1009 | 1134 |     | 3.53509199017 |
| NM_001636    | SLC25A6 63   | 243  |     | 4.85702008505 |
| NM_001633    | AMBP 174     | 247  |     | 2.79809296533 |
| NM_001633    | AMBP 66      | 151  |     | 1.66058944158 |
| NM_001633    | AMBP 998     | 1351 |     | 4.86222330275 |
| NM_001633    | AMBP 254     | 990  |     | 5.81439477766 |
| NM_198269    | HIPK1 3010   | 3082 |     | 7.58270125483 |
| NM_198269    | HIPK1 350    | 478  |     | 6.586718855   |
| NM_198269    | HIPK1 3087   | 3157 |     | 7.586718855   |
| NM_198269    | HIPK1 6425   | 6460 |     | 6.58654510468 |
| NM_198269    | HIPK1 2403   | 2457 |     | 6.58671885478 |
| NM_198269    | HIPK1 5151   | 5201 |     | 6.58270125483 |
| NM_198269    | HIPK1 4533   | 4588 |     | 6.50257964562 |
| NM_198269    | HIPK1 4423   | 4468 |     | 6.50257964562 |
| NM_198269    | HIPK1 1874   | 2020 |     | 8.90864694989 |
| NM_198269    | HIPK1 177    | 244  |     | 7.58270125483 |
| NM_198269    | HIPK1 1590   | 1678 |     | 6.58671861908 |
| NM_198269    | HIPK1 1044   | 1113 |     | 7.58671885478 |
| NM_001003891 | MED15 1774   | 1858 |     | 6.27266287401 |
| NM_001003891 | MED15 2007   | 2067 |     | 6.85762513881 |
| NM_001003891 | MED15 2405   | 2456 |     | 5.27266286646 |
| NM_001003891 | MED15 2618   | 2657 |     | 6.77348616535 |
| NM_001003891 | MED15 2210   | 2312 |     | 6.27266287401 |
| NM_001003891 | MED15 297    | 427  |     | 7.5945909689  |
| NM_001003891 | MED15 1611   | 1684 |     | 5.27266287401 |
| NM_001003891 | MED15 2832   | 2913 |     | 6.27266287401 |
| NM_198264    | FAM189B 278  | 322  |     | 8.20326025204 |
| NM_198264    | FAM189B 2295 | 2372 |     | 9.20326025959 |
| NM_198264    | FAM189B 2474 | 2581 |     | 11.5251883545 |
| NM_198264    | FAM189B 1433 | 1466 |     | 8.20308650927 |
| NM_198264    | FAM189B 1129 | 1212 |     | 9.20326025204 |
| NM_198264    | FAM189B 806  | 984  |     | 12.2032602596 |
| NM_198264    | FAM189B 1036 | 1104 |     | 9.20325352853 |
| NM_198264    | FAM189B 1273 | 1425 |     | 10.7882227603 |
| NM_198264    | FAM189B 1794 | 1923 |     | 10.2032602596 |
| NM_032822    | FAM136A 347  | 424  |     | 6.36363653406 |
| NM_032822    | FAM136A 1013 | 1072 |     | 5.77867403311 |
| NM_032822    | FAM136A 600  | 648  |     | 6.27949732467 |
| NM_032822    | FAM136A 1652 | 1695 |     | 5.77465643316 |
| NM_032822    | FAM136A 1728 | 1772 |     | 4.69453482395 |
| NM_032822    | FAM136A 1145 | 1262 |     | 6.36363653406 |

|              |         |      |      |               |
|--------------|---------|------|------|---------------|
| NM_032824    | TMEM87B | 1741 | 1843 | 8.42860108586 |
| NM_032824    | TMEM87B | 856  | 906  | 6.42860107831 |
| NM_032824    | TMEM87B | 924  | 1016 | 8.75052918075 |
| NM_032824    | TMEM87B | 2849 | 2891 | 8.00954598641 |
| NM_032824    | TMEM87B | 1866 | 1914 | 7.42860108585 |
| NM_032824    | TMEM87B | 1030 | 1143 | 9.23595600792 |
| NM_032824    | TMEM87B | 1312 | 1435 | 9.01356358658 |
| NM_032824    | TMEM87B | 710  | 777  | 8.01356358658 |
| NM_032824    | TMEM87B | 1922 | 2093 | 9.75052918075 |
| NM_032824    | TMEM87B | 1438 | 1729 | 10.6765285993 |
| NM_032824    | TMEM87B | 474  | 692  | 10.4286010859 |
| NM_032824    | TMEM87B | 1162 | 1310 | 10.129040804  |
| NM_032826    | SLC35B4 | 1985 | 2022 | 8.47017474276 |
| NM_032826    | SLC35B4 | 4211 | 4276 | 9.47419210702 |
| NM_032826    | SLC35B4 | 354  | 404  | 9.47419234271 |
| NM_032826    | SLC35B4 | 198  | 238  | 8.39005313355 |
| NM_032826    | SLC35B4 | 921  | 976  | 11.0591548437 |
| NM_032826    | SLC35B4 | 1288 | 1345 | 8.47419233539 |
| NM_032826    | SLC35B4 | 1163 | 1224 | 10.0591481126 |
| NM_032826    | SLC35B4 | 768  | 901  | 11.9336239616 |
| NM_032826    | SLC35B4 | 1592 | 1735 | 10.7961204378 |
| NM_032826    | SLC35B4 | 981  | 1067 | 10.4741923429 |
| NM_032826    | SLC35B4 | 4880 | 4979 | 10.0591546077 |
| NM_032826    | SLC35B4 | 2316 | 2401 | 9.47401859262 |
| NM_032826    | SLC35B4 | 405  | 477  | 10.4741923429 |
| NM_032826    | SLC35B4 | 548  | 656  | 10.0591548437 |
| NM_032826    | SLC35B4 | 101  | 157  | 9.47017474276 |
| NM_001008712 | RBPMS   | 932  | 978  | 3.96696964482 |
| NM_001008712 | RBPMS   | 667  | 831  | 7.3730369491  |
| NM_001037333 | CYFIP2  | 2911 | 2982 | 5.85337467638 |
| NM_001037333 | CYFIP2  | 2637 | 2695 | 5.76924219805 |
| NM_001037335 | PRIC285 | 2725 | 2768 | 8.69559018601 |
| NM_016581    | ECSIT   | 1002 | 1043 | 6.08161275586 |
| NM_016581    | ECSIT   | 254  | 312  | 6.99764729679 |
| NM_016581    | ECSIT   | 599  | 659  | 7.08178627026 |
| NM_016581    | ECSIT   | 660  | 756  | 8.40371460107 |
| NM_016581    | ECSIT   | 1104 | 1160 | 6.08161275586 |
| NM_007198    | PROSC   | 229  | 298  | 5.15897142714 |
| NM_007198    | PROSC   | 597  | 641  | 6.15897142714 |
| NM_007198    | PROSC   | 1928 | 2009 | 7.16298901977 |
| NM_016587    | CBX3    | 566  | 707  | 4.61635546685 |
| NM_016587    | CBX3    | 113  | 162  | 2.49686064926 |
| NM_016587    | CBX3    | 1499 | 1679 | 4.61635546685 |
| NM_016587    | CBX3    | 728  | 792  | 3.72327067077 |
| NM_016587    | CBX3    | 39   | 86   | 1.83177653933 |
| NM_016587    | CBX3    | 1000 | 1110 | 2.91591574871 |
| NM_016587    | CBX3    | 805  | 948  | 4.37534736735 |
| NM_016587    | CBX3    | 170  | 534  | 5.96030986807 |
| NM_144498    | OSBPL2  | 706  | 761  | 4.26625943067 |
| NM_144498    | OSBPL2  | 2752 | 2852 | 4.27027703085 |

|           |         |      |      |               |
|-----------|---------|------|------|---------------|
| NM_007194 | CHEK2   | 1679 | 1735 | 8.86524586827 |
| NM_007194 | CHEK2   | 1055 | 1098 | 8.78111338994 |
| NM_007194 | CHEK2   | 1317 | 1429 | 8.86525259933 |
| NM_007194 | CHEK2   | 1170 | 1309 | 9.86525259933 |
| NM_181485 | ZGPAT   | 992  | 1079 | 7.16106311242 |
| NM_181485 | ZGPAT   | 907  | 978  | 5.57592686138 |
| NM_007190 | SEC23IP | 1543 | 1649 | 8.92438993529 |
| NM_007190 | SEC23IP | 1781 | 1824 | 7.18340674095 |
| NM_007190 | SEC23IP | 1027 | 1109 | 7.6024618404  |
| NM_007190 | SEC23IP | 1832 | 1886 | 7.18741761007 |
| NM_007190 | SEC23IP | 1994 | 2046 | 5.60246184039 |
| NM_007190 | SEC23IP | 2156 | 2214 | 6.60245510934 |
| NM_007190 | SEC23IP | 2452 | 2528 | 7.92438993506 |
| NM_007190 | SEC23IP | 3570 | 3629 | 5.60228809008 |
| NM_007190 | SEC23IP | 2678 | 2761 | 7.18742433357 |
| NM_007192 | SUPT16H | 1175 | 1231 | 4.18974878378 |
| NM_007192 | SUPT16H | 885  | 950  | 2.52064730959 |
| NM_007192 | SUPT16H | 1262 | 1373 | 6.06421813761 |
| NM_007192 | SUPT16H | 1043 | 1122 | 2.60478628306 |
| NM_007192 | SUPT16H | 4564 | 4654 | 4.60478651898 |
| NM_007192 | SUPT16H | 490  | 549  | 4.92671461386 |
| NM_007192 | SUPT16H | 1901 | 1982 | 5.41214144103 |
| NM_007192 | SUPT16H | 2219 | 2368 | 5.77471152042 |
| NM_007192 | SUPT16H | 2372 | 2447 | 4.18974901969 |
| NM_007192 | SUPT16H | 3738 | 3847 | 4.92671461386 |
| NM_007192 | SUPT16H | 4210 | 4283 | 4.60478651898 |
| NM_007192 | SUPT16H | 703  | 835  | 4.60478651898 |
| NM_007192 | SUPT16H | 2029 | 2128 | 4.92671461386 |
| NM_007192 | SUPT16H | 3601 | 3651 | 3.60461276866 |
| NM_007192 | SUPT16H | 2134 | 2214 | 3.60478651898 |
| NM_007192 | SUPT16H | 1378 | 1431 | 2.6007689188  |
| NM_007192 | SUPT16H | 4014 | 4083 | 4.1897490197  |
| NM_007192 | SUPT16H | 3242 | 3441 | 2.60478651898 |
| NM_007192 | SUPT16H | 3901 | 4006 | 2.60478651898 |
| NM_007192 | SUPT16H | 1603 | 1694 | 2.60477978792 |
| NM_007192 | SUPT16H | 1434 | 1499 | 4.92671461386 |
| NM_007192 | SUPT16H | 4357 | 4546 | 6.1897490197  |
| NM_007192 | SUPT16H | 2822 | 3174 | 6.77471152042 |
| NM_007192 | SUPT16H | 3443 | 3574 | 5.77471152042 |
| NM_007192 | SUPT16H | 320  | 417  | 4.60478651898 |
| NM_007192 | SUPT16H | 2523 | 2772 | 6.41214144103 |
| NM_015852 | ZNF117  | 4399 | 4494 | 7.62615400879 |
| NM_015853 | UBXN1   | 814  | 874  | 3.64985896307 |
| NM_015853 | UBXN1   | 1264 | 1349 | 4.64986569412 |
| NM_015853 | UBXN1   | 401  | 439  | 4.6496919438  |
| NM_015853 | UBXN1   | 451  | 515  | 4.6498654582  |
| NM_015853 | UBXN1   | 194  | 326  | 6.23482819484 |
| NM_015859 | GTF2A1  | 3972 | 4034 | 4.86855112921 |
| NM_015859 | GTF2A1  | 4970 | 5073 | 4.95269033859 |
| NM_015859 | GTF2A1  | 470  | 558  | 5.95269033859 |

|              |        |      |      |               |
|--------------|--------|------|------|---------------|
| NM_003851    | CREG1  | 572  | 626  | 10.9858627079 |
| NM_003851    | CREG1  | 903  | 956  | 9.66393460543 |
| NM_003851    | CREG1  | 222  | 303  | 10.2488971137 |
| NM_003851    | CREG1  | 1877 | 1924 | 9.66393461297 |
| NM_003851    | CREG1  | 385  | 424  | 8.57979540359 |
| NM_003851    | CREG1  | 1658 | 1768 | 9.66393461298 |
| NM_003851    | CREG1  | 439  | 566  | 12.471289535  |
| NM_003851    | CREG1  | 835  | 881  | 9.6599170128  |
| NM_003851    | CREG1  | 648  | 769  | 11.663934613  |
| NM_003850    | SUCLA2 | 1415 | 1477 | 4.66292534724 |
| NM_003850    | SUCLA2 | 1146 | 1188 | 4.65890798298 |
| NM_003850    | SUCLA2 | 1498 | 1546 | 3.65890798298 |
| NM_003850    | SUCLA2 | 1335 | 1404 | 3.66292557561 |
| NM_003850    | SUCLA2 | 831  | 968  | 6.24788808388 |
| NM_203341    | SEP15  | 874  | 949  | 4.76485353875 |
| NM_203341    | SEP15  | 626  | 797  | 8.01278105219 |
| NM_203341    | SEP15  | 352  | 620  | 8.28841549481 |
| NM_203341    | SEP15  | 1028 | 1215 | 6.93477854019 |
| NM_018728    | MY05C  | 6153 | 6213 | 6.38117646041 |
| NM_018728    | MY05C  | 4797 | 4886 | 7.38118295555 |
| NM_018728    | MY05C  | 1641 | 1686 | 6.37716559129 |
| NM_018728    | MY05C  | 1448 | 1618 | 7.96614569219 |
| NM_001167961 | KCTD7  | 1908 | 1942 | 8.18972363285 |
| NM_001167961 | KCTD7  | 1833 | 1899 | 9.26984524206 |
| NM_001167961 | KCTD7  | 2221 | 2267 | 9.85480774278 |
| NM_145012    | CCNY   | 1651 | 1696 | 3.99208421387 |
| NM_145012    | CCNY   | 982  | 1074 | 6.99610181405 |
| NM_145012    | CCNY   | 2456 | 2507 | 4.99610157813 |
| NM_145012    | CCNY   | 1596 | 1640 | 5.58106431454 |
| NM_145012    | CCNY   | 1545 | 1588 | 3.91196260466 |
| NM_145012    | CCNY   | 793  | 853  | 3.99208421387 |
| NM_145012    | CCNY   | 635  | 686  | 4.99592806373 |
| NM_145012    | CCNY   | 297  | 437  | 5.99610181405 |
| NM_145012    | CCNY   | 857  | 961  | 6.31802990893 |
| NM_145012    | CCNY   | 1739 | 1937 | 7.31802990893 |
| NM_145012    | CCNY   | 691  | 765  | 5.99610157813 |
| NM_145012    | CCNY   | 1106 | 1196 | 3.99609508299 |
| NM_145012    | CCNY   | 2012 | 2111 | 5.58106431477 |
| NM_003859    | DPM1   | 399  | 449  | 2.93574419698 |
| NM_003859    | DPM1   | 272  | 327  | 3.01586580619 |
| NM_003859    | DPM1   | 182  | 238  | 4.01988340636 |
| NM_003859    | DPM1   | 640  | 712  | 4.60483917603 |
| NM_017988    | SCYL2  | 948  | 1009 | 7.91677772717 |
| NM_017988    | SCYL2  | 461  | 506  | 6.24767601706 |
| NM_017988    | SCYL2  | 3563 | 3670 | 8.91677772717 |
| NM_017988    | SCYL2  | 2384 | 2439 | 6.33181522623 |
| NM_017988    | SCYL2  | 1472 | 1537 | 7.33180849539 |
| NM_017988    | SCYL2  | 1547 | 1599 | 6.24767601706 |
| NM_017988    | SCYL2  | 721  | 778  | 7.91677099612 |
| NM_017988    | SCYL2  | 2674 | 2720 | 6.24767601706 |

|              |        |      |      |               |
|--------------|--------|------|------|---------------|
| NM_017988    | SCYL2  | 1985 | 2059 | 6.32779762628 |
| NM_017988    | SCYL2  | 2300 | 2374 | 6.33180849539 |
| NM_198488    | FAM83H | 286  | 362  | 12.082373245  |
| NM_198488    | FAM83H | 751  | 806  | 11.4972370016 |
| NM_198488    | FAM83H | 716  | 751  | 10.4933931517 |
| NM_198488    | FAM83H | 3941 | 3981 | 10.4933931517 |
| NM_198488    | FAM83H | 519  | 574  | 11.0823665215 |
| NM_198488    | FAM83H | 383  | 426  | 11.4972370016 |
| NM_198488    | FAM83H | 1079 | 1122 | 10.9982340432 |
| NM_198488    | FAM83H | 2735 | 2786 | 9.49741051595 |
| NM_198488    | FAM83H | 5388 | 5461 | 11.8193388468 |
| NM_198488    | FAM83H | 4227 | 4290 | 9.49740402082 |
| NM_198488    | FAM83H | 1895 | 1945 | 10.4972370016 |
| NM_198488    | FAM83H | 225  | 270  | 10.4132715425 |
| NM_198488    | FAM83H | 609  | 678  | 10.9982340432 |
| NM_198488    | FAM83H | 1370 | 1461 | 10.4974107519 |
| NM_198488    | FAM83H | 3988 | 4028 | 9.49723700155 |
| NM_198488    | FAM83H | 5034 | 5158 | 11.4974107519 |
| NM_198488    | FAM83H | 5159 | 5257 | 10.4933931517 |
| NM_198488    | FAM83H | 1809 | 1871 | 10.497410516  |
| NM_198488    | FAM83H | 67   | 140  | 9.4933931517  |
| NM_198488    | FAM83H | 3842 | 3937 | 10.4974107519 |
| NM_002106    | H2AFZ  | 72   | 237  | 4.44576455184 |
| NM_002106    | H2AFZ  | 238  | 920  | 7.09346280791 |
| NM_002107    | H3F3A  | 580  | 719  | 5.14736659556 |
| NM_002107    | H3F3A  | 59   | 149  | 3.44692687742 |
| NM_002107    | H3F3A  | 720  | 794  | 4.03188937814 |
| NM_002107    | H3F3A  | 819  | 888  | 2.44692687742 |
| NM_002107    | H3F3A  | 235  | 450  | 6.35381747303 |
| NM_002107    | H3F3A  | 888  | 1043 | 5.14736659556 |
| NM_002103    | GYS1   | 3557 | 3604 | 7.25801980332 |
| NM_002103    | GYS1   | 1038 | 1107 | 8.25801980332 |
| NM_002103    | GYS1   | 241  | 299  | 8.25819355364 |
| NM_002103    | GYS1   | 3276 | 3329 | 7.25819355342 |
| NM_002103    | GYS1   | 685  | 719  | 7.25801980332 |
| NM_002103    | GYS1   | 1698 | 1762 | 8.84315604681 |
| NM_002103    | GYS1   | 1334 | 1386 | 8.25417595347 |
| NM_002103    | GYS1   | 1146 | 1311 | 9.84315605436 |
| NM_002103    | GYS1   | 872  | 974  | 8.25819355364 |
| NM_002103    | GYS1   | 3334 | 3405 | 8.83913845419 |
| NM_002103    | GYS1   | 545  | 658  | 7.25819355364 |
| NM_002103    | GYS1   | 3158 | 3229 | 8.25818682259 |
| NM_002103    | GYS1   | 1986 | 2048 | 7.25801980332 |
| NM_001242617 | NXT2   | 2461 | 2581 | 6.67214387726 |
| NM_198484    | ZNF621 | 1846 | 1914 | 8.03956598685 |
| NM_001184965 | WDR44  | 2235 | 2280 | 9.18646615251 |
| NM_001184965 | WDR44  | 1894 | 1980 | 7.60151014692 |
| NM_198486    | RPL7L1 | 429  | 552  | 5.54098905652 |
| NM_198486    | RPL7L1 | 870  | 986  | 4.9560265558  |
| NM_024041    | SCNM1  | 1148 | 1236 | 7.04337725953 |

|              |          |      |      |               |               |
|--------------|----------|------|------|---------------|---------------|
| NM_024041    | SCNM1    | 534  | 562  | 6.95923805015 |               |
| NM_024041    | SCNM1    | 772  | 839  | 7.04337052848 |               |
| NM_024040    | CUEDC2   | 512  | 548  | 8.22531041232 |               |
| NM_024040    | CUEDC2   | 143  | 222  | 7.64436527586 |               |
| NM_024045    | DDX50    | 1811 | 1893 | 6.42448730463 |               |
| NM_024045    | DDX50    | 1442 | 1492 | 6.34034809525 |               |
| NM_024045    | DDX50    | 926  | 999  | 7.00944980535 |               |
| NM_024044    | SLX1B    | 741  | 791  | 5.12299213004 |               |
| NM_024044    | SLX1B    | 957  | 1076 | 7.71197223093 |               |
| NM_024044    | SLX1B    | 279  | 386  | 7.12700973021 |               |
| NM_024047    | NUDT9    | 475  | 501  | 6.9821329261  |               |
| NM_024047    | NUDT9    | 355  | 402  | 6.48130963477 |               |
| NM_024047    | NUDT9    | 571  | 652  | 7.48130963477 |               |
| NM_024047    | NUDT9    | 127  | 187  | 5.48130962722 |               |
| NM_024047    | NUDT9    | 904  | 1018 | 7.06627213549 |               |
| NM_024047    | NUDT9    | 1156 | 1280 | 8.06627213549 |               |
| NM_024047    | NUDT9    | 1330 | 1401 | 7.06627189957 |               |
| NM_024047    | NUDT9    | 503  | 566  | 7.06627213549 |               |
| NM_024047    | NUDT9    | 716  | 873  | 7.80323772965 |               |
| NM_001136262 | ATXN7L3B |      | 2237 | 2354          | 3.51399926912 |
| NM_001136262 | ATXN7L3B |      | 594  | 638           | 4.51399926157 |
| NM_001136262 | ATXN7L3B |      | 3398 | 3443          | 4.51399926912 |
| NM_001136262 | ATXN7L3B |      | 1691 | 1790          | 5.83592736401 |
| NM_001136262 | ATXN7L3B |      | 2041 | 2101          | 3.50998166895 |
| NM_001136262 | ATXN7L3B |      | 3544 | 3587          | 4.5138255188  |
| NM_001136262 | ATXN7L3B |      | 2636 | 2773          | 6.32135419118 |
| NM_001136262 | ATXN7L3B |      | 1416 | 1549          | 5.09896176984 |
| NM_001136262 | ATXN7L3B |      | 312  | 377           | 4.51399926157 |
| NM_001136262 | ATXN7L3B |      | 3291 | 3360          | 3.51399253807 |
| NM_001136262 | ATXN7L3B |      | 969  | 1151          | 6.68392427056 |
| NM_001136262 | ATXN7L3B |      | 379  | 530           | 6.83592736401 |
| NM_001136265 | IFFO2    | 1809 | 1880 | 7.50176516672 |               |
| NM_001084392 | DDT      | 373  | 511  | 8.12887658222 |               |
| NM_001084392 | DDT      | 523  | 577  | 4.66943823253 |               |
| NM_001084392 | DDT      | 53   | 233  | 7.47679988564 |               |
| NM_001084392 | DDT      | 250  | 326  | 4.66944472766 |               |
| NM_001205254 | OCLN     | 290  | 354  | 7.37744233358 |               |
| NM_001205254 | OCLN     | 1626 | 1703 | 5.79247983286 |               |
| NM_001205254 | OCLN     | 4524 | 4570 | 5.20734358182 |               |
| NM_001205254 | OCLN     | 4157 | 4306 | 7.37744233358 |               |
| NM_001205254 | OCLN     | 4650 | 4743 | 6.20751733214 |               |
| NM_001205254 | OCLN     | 4593 | 4638 | 5.12337812276 |               |
| NM_001205254 | OCLN     | 2160 | 2245 | 7.20751733214 |               |
| NM_001205254 | OCLN     | 4062 | 4120 | 5.79247982531 |               |
| NM_001205254 | OCLN     | 634  | 757  | 7.66694895078 |               |
| NM_001205254 | OCLN     | 2529 | 2615 | 6.20751733192 |               |
| NM_001205254 | OCLN     | 2904 | 2960 | 5.20751733192 |               |
| NM_001205254 | OCLN     | 107  | 234  | 7.20751733214 |               |
| NM_001205254 | OCLN     | 2757 | 2842 | 5.78846223269 |               |
| NM_001205254 | OCLN     | 1098 | 1219 | 7.0148722542  |               |

|              |         |      |      |               |
|--------------|---------|------|------|---------------|
| NM_001205254 | OCLN    | 1722 | 1882 | 8.11440792775 |
| NM_001205254 | OCLN    | 1924 | 2094 | 7.52944542703 |
| NM_001205254 | OCLN    | 1219 | 1622 | 9.11440792775 |
| NM_001205254 | OCLN    | 769  | 1091 | 9.7310792882  |
| NM_001205254 | OCLN    | 3522 | 3608 | 4.20751733214 |
| NM_001205254 | OCLN    | 367  | 565  | 8.45544484559 |
| NM_078473    | TM2D2   | 994  | 1069 | 8.57353777529 |
| NM_078473    | TM2D2   | 1170 | 1266 | 8.57353801121 |
| NM_078473    | TM2D2   | 849  | 920  | 9.15850051193 |
| NM_078473    | TM2D2   | 761  | 825  | 8.57336426089 |
| NM_078473    | TM2D2   | 269  | 444  | 10.8954661061 |
| NM_078473    | TM2D2   | 447  | 734  | 11.6610008525 |
| NM_078473    | TM2D2   | 111  | 189  | 9.57353801121 |
| NM_078473    | TM2D2   | 1081 | 1149 | 9.15850050438 |
| NM_030939    | C6orf62 | 2301 | 2343 | 7.09867994605 |
| NM_030939    | C6orf62 | 1352 | 1413 | 7.10252379591 |
| NM_030939    | C6orf62 | 234  | 279  | 7.68364244677 |
| NM_002816    | PSMD12  | 1097 | 1183 | 4.63791925671 |
| NM_002816    | PSMD12  | 1327 | 1386 | 4.63791925671 |
| NM_002816    | PSMD12  | 1189 | 1240 | 5.22288175743 |
| NM_002816    | PSMD12  | 1562 | 1620 | 3.63791925671 |
| NM_002816    | PSMD12  | 62   | 137  | 3.63791902079 |
| NM_002816    | PSMD12  | 863  | 1019 | 6.44527417877 |
| NM_002816    | PSMD12  | 1257 | 1320 | 3.63390165654 |
| NM_002816    | PSMD12  | 215  | 332  | 6.44527417877 |
| NM_002816    | PSMD12  | 440  | 549  | 6.22288175743 |
| NM_002816    | PSMD12  | 1449 | 1548 | 5.63791925671 |
| NM_002816    | PSMD12  | 1019 | 1091 | 5.22288174988 |
| NM_002814    | PSMD10  | 172  | 222  | 4.94373303997 |
| NM_002814    | PSMD10  | 1040 | 1084 | 4.86361143076 |
| NM_002814    | PSMD10  | 224  | 305  | 4.94775064014 |
| NM_002815    | PSMD11  | 3469 | 3506 | 3.7920550609  |
| NM_002815    | PSMD11  | 2820 | 2853 | 3.71193345169 |
| NM_002815    | PSMD11  | 2340 | 2406 | 4.79607266107 |
| NM_002815    | PSMD11  | 2112 | 2214 | 6.38103516179 |
| NM_002815    | PSMD11  | 1733 | 1819 | 4.79607266107 |
| NM_002815    | PSMD11  | 2445 | 2500 | 4.79606593002 |
| NM_002815    | PSMD11  | 1822 | 1896 | 5.38103516179 |
| NM_002815    | PSMD11  | 363  | 501  | 6.79607266107 |
| NM_002815    | PSMD11  | 152  | 360  | 8.25550427971 |
| NM_002815    | PSMD11  | 1408 | 1473 | 5.38103516179 |
| NM_002815    | PSMD11  | 844  | 1093 | 8.04400017452 |
| NM_002815    | PSMD11  | 503  | 842  | 8.31963461713 |
| NM_002815    | PSMD11  | 2719 | 2819 | 3.79607266107 |
| NM_002815    | PSMD11  | 2575 | 2647 | 3.79607266107 |
| NM_002815    | PSMD11  | 1100 | 1381 | 8.38103516179 |
| NM_002812    | PSMD8   | 610  | 665  | 5.89634713404 |
| NM_002812    | PSMD8   | 448  | 525  | 7.21827522893 |
| NM_002812    | PSMD8   | 916  | 984  | 6.48130962722 |
| NM_002812    | PSMD8   | 297  | 368  | 7.21827522893 |

|           |         |      |      |               |
|-----------|---------|------|------|---------------|
| NM_002812 | PSMD8   | 396  | 445  | 7.21827522893 |
| NM_002812 | PSMD8   | 1062 | 1126 | 5.89634713404 |
| NM_002812 | PSMD8   | 823  | 890  | 6.48130963476 |
| NM_002810 | PSMD4   | 778  | 853  | 5.85176537227 |
| NM_002810 | PSMD4   | 655  | 723  | 6.21433545165 |
| NM_002810 | PSMD4   | 1205 | 1286 | 4.62937295093 |
| NM_002810 | PSMD4   | 527  | 643  | 6.21433545165 |
| NM_002810 | PSMD4   | 437  | 527  | 4.04441021429 |
| NM_002810 | PSMD4   | 1090 | 1185 | 3.0444104502  |
| NM_002810 | PSMD4   | 50   | 381  | 7.21433545165 |
| NM_002810 | PSMD4   | 862  | 1067 | 6.04441045021 |
| NM_002811 | PSMD7   | 1454 | 1532 | 3.03969516762 |
| NM_002811 | PSMD7   | 670  | 725  | 3.03969540331 |
| NM_002811 | PSMD7   | 404  | 556  | 5.20962040498 |
| NM_002811 | PSMD7   | 562  | 662  | 4.84705032559 |
| NM_002811 | PSMD7   | 728  | 779  | 3.62448415394 |
| NM_002811 | PSMD7   | 1164 | 1331 | 4.84705032559 |
| NM_002811 | PSMD7   | 204  | 355  | 4.84705032559 |
| NM_002811 | PSMD7   | 779  | 968  | 5.36162349842 |
| NM_002818 | PSME2   | 765  | 805  | 5.67756075243 |
| NM_002818 | PSME2   | 655  | 714  | 4.67756075243 |
| NM_002818 | PSME2   | 276  | 314  | 4.67755402138 |
| NM_002818 | PSME2   | 472  | 602  | 6.99948884732 |
| NM_002818 | PSME2   | 110  | 270  | 7.48491567449 |
| NM_002818 | PSME2   | 333  | 402  | 6.2625165221  |
| NM_002819 | PTBP1   | 1952 | 2010 | 4.362774444   |
| NM_002819 | PTBP1   | 2086 | 2156 | 5.68470254643 |
| NM_002819 | PTBP1   | 2693 | 2778 | 4.36277445155 |
| NM_002819 | PTBP1   | 1839 | 1889 | 4.94773671635 |
| NM_002819 | PTBP1   | 1053 | 1117 | 5.36277421563 |
| NM_002819 | PTBP1   | 1592 | 1692 | 6.36277445155 |
| NM_002819 | PTBP1   | 13   | 53   | 4.35875685137 |
| NM_002819 | PTBP1   | 2784 | 2967 | 7.75509187432 |
| NM_002819 | PTBP1   | 1364 | 1591 | 6.68470254643 |
| NM_002819 | PTBP1   | 602  | 763  | 7.36277445155 |
| NM_002819 | PTBP1   | 3119 | 3259 | 6.36277445155 |
| NM_002819 | PTBP1   | 277  | 383  | 4.94773694472 |
| NM_002819 | PTBP1   | 1243 | 1341 | 6.1701293736  |
| NM_002819 | PTBP1   | 1140 | 1213 | 5.94773695227 |
| NM_002819 | PTBP1   | 60   | 255  | 7.8863364076  |
| NM_002819 | PTBP1   | 767  | 978  | 6.53269945299 |
| NM_002819 | PTBP1   | 2356 | 2463 | 7.06321416969 |
| NM_002819 | PTBP1   | 503  | 598  | 4.94773695227 |
| NM_002819 | PTBP1   | 2535 | 2657 | 5.36277445155 |
| NM_002819 | PTBP1   | 2211 | 2304 | 3.36277421563 |
| NM_002819 | PTBP1   | 387  | 479  | 3.36277445155 |
| NM_024596 | MCPH1   | 2620 | 2669 | 7.18926812695 |
| NM_024595 | AKIRIN1 | 2356 | 2417 | 5.76773317053 |
| NM_024595 | AKIRIN1 | 1089 | 1173 | 6.35269567125 |
| NM_024595 | AKIRIN1 | 664  | 696  | 6.3526889402  |



|           |          |      |      |                   |
|-----------|----------|------|------|-------------------|
| NM_024595 | AKIRIN1  | 503  | 550  | 6.35252192093     |
| NM_024595 | AKIRIN1  | 746  | 853  | 6.76773317053     |
| NM_024595 | AKIRIN1  | 333  | 438  | 6.76773317053     |
| NM_024595 | AKIRIN1  | 1216 | 1349 | 6.35269567125     |
| NM_024595 | AKIRIN1  | 1990 | 2056 | 6.76772643947     |
| NM_024595 | AKIRIN1  | 2250 | 2332 | 4.76773316298     |
| NM_024594 | PANK3    | 2186 | 2248 | 4.42350358457     |
| NM_024594 | PANK3    | 459  | 495  | 4.4233298418      |
| NM_024594 | PANK3    | 3104 | 3138 | 3.33936438273     |
| NM_024594 | PANK3    | 363  | 429  | 5.42349686106     |
| NM_024594 | PANK3    | 509  | 558  | 4.41948599195     |
| NM_024594 | PANK3    | 3258 | 3333 | 5.00846609262     |
| NM_024594 | PANK3    | 1722 | 1838 | 6.00846609284     |
| NM_024594 | PANK3    | 1352 | 1429 | 5.42350358457     |
| NM_024594 | PANK3    | 942  | 1052 | 5.4235035919      |
| NM_024594 | PANK3    | 1084 | 1197 | 5.00846609284     |
| NM_024594 | PANK3    | 2843 | 2972 | 5.42350359212     |
| NM_024594 | PANK3    | 1224 | 1328 | 5.00846609284     |
| NM_024594 | PANK3    | 686  | 809  | 5.00846609284     |
| NM_024594 | PANK3    | 309  | 356  | 3.4233298418      |
| NM_024592 | SRD5A3   | 351  | 428  | 10.0014689362     |
| NM_024592 | SRD5A3   | 493  | 551  | 9.00146220515     |
| NM_024592 | SRD5A3   | 437  | 483  | 7.3323672261      |
| NM_024592 | SRD5A3   | 1075 | 1148 | 7.41650642794     |
| NM_024592 | SRD5A3   | 583  | 677  | 9.73843453037     |
| NM_024592 | SRD5A3   | 707  | 764  | 9.41633268517     |
| NM_024592 | SRD5A3   | 807  | 921  | 10.2238613575     |
| NM_024592 | SRD5A3   | 936  | 1004 | 9.41649970443     |
| NM_024592 | SRD5A3   | 198  | 279  | 7.41650643549     |
| NM_024598 | C16orf57 |      | 244  | 302 8.21547585024 |
| NM_080927 | DCBLD2   | 4154 | 4222 | 8.55291956889     |
| NM_080927 | DCBLD2   | 2993 | 3053 | 7.55291956889     |
| NM_080927 | DCBLD2   | 2503 | 2542 | 8.55693043801     |
| NM_080927 | DCBLD2   | 1001 | 1051 | 7.55693043801     |
| NM_080927 | DCBLD2   | 5780 | 5836 | 8.55693716906     |
| NM_080927 | DCBLD2   | 1152 | 1203 | 8.55693716152     |
| NM_080927 | DCBLD2   | 2861 | 2937 | 8.55693716907     |
| NM_080927 | DCBLD2   | 4046 | 4119 | 8.55291956889     |
| NM_080927 | DCBLD2   | 4790 | 4869 | 8.55693716907     |
| NM_080927 | DCBLD2   | 471  | 620  | 10.1418996698     |
| NM_080927 | DCBLD2   | 1492 | 1576 | 10.1418996698     |
| NM_080927 | DCBLD2   | 2761 | 2829 | 8.55693716906     |
| NM_080927 | DCBLD2   | 3228 | 3302 | 8.55693716907     |
| NM_080927 | DCBLD2   | 3379 | 3476 | 8.55693716906     |
| NM_080927 | DCBLD2   | 4704 | 4790 | 9.55693716884     |
| NM_080927 | DCBLD2   | 1240 | 1351 | 9.87886526395     |
| NM_080927 | DCBLD2   | 5244 | 5322 | 8.55693043801     |
| NM_080927 | DCBLD2   | 648  | 840  | 11.5569371691     |
| NM_080927 | DCBLD2   | 1844 | 1974 | 9.14189966979     |
| NM_080927 | DCBLD2   | 858  | 983  | 10.878865264      |

|              |       |      |      |               |
|--------------|-------|------|------|---------------|
| NM_001145522 | RAI14 | 4715 | 4762 | 6.40593455686 |
| NM_001145522 | RAI14 | 3383 | 3488 | 6.40977840671 |
| NM_001145522 | RAI14 | 2303 | 2356 | 5.40593455686 |
| NM_001145522 | RAI14 | 4202 | 4270 | 7.73188025192 |
| NM_001145522 | RAI14 | 817  | 872  | 5.40995215681 |
| NM_001145522 | RAI14 | 2968 | 3016 | 6.40995192111 |
| NM_001145522 | RAI14 | 4486 | 4544 | 6.40593455686 |
| NM_001145522 | RAI14 | 3525 | 3611 | 5.40994542598 |
| NM_001145522 | RAI14 | 3051 | 3209 | 6.99491465775 |
| NM_012405    | ICMT  | 194  | 273  | 7.07051006307 |
| NM_012405    | ICMT  | 3216 | 3294 | 6.0664924629  |
| NM_012405    | ICMT  | 97   | 169  | 5.98637085369 |
| NM_012405    | ICMT  | 3012 | 3064 | 7.65546583274 |
| NM_012405    | ICMT  | 3949 | 4015 | 7.07051005552 |
| NM_012405    | ICMT  | 1246 | 1308 | 7.65547256379 |
| NM_012405    | ICMT  | 2914 | 2982 | 6.07033631275 |
| NM_012405    | ICMT  | 901  | 937  | 7.57133335441 |
| NM_012405    | ICMT  | 944  | 1006 | 8.07050982715 |
| NM_012405    | ICMT  | 1011 | 1104 | 9.24043506451 |
| NM_012405    | ICMT  | 1702 | 1831 | 7.65547256379 |
| NM_012405    | ICMT  | 1832 | 1950 | 8.39243815796 |
| NM_012405    | ICMT  | 276  | 547  | 11.19979308   |
| NM_012405    | ICMT  | 2099 | 2179 | 7.65547255624 |
| NM_012405    | ICMT  | 1568 | 1671 | 7.07051006307 |
| NM_012405    | ICMT  | 2307 | 2442 | 9.07051006307 |
| NM_012405    | ICMT  | 3730 | 3805 | 6.07051006307 |
| NM_012405    | ICMT  | 548  | 871  | 10.8253975652 |
| NM_002336    | LRP6  | 172  | 216  | 6.08429693334 |
| NM_002336    | LRP6  | 5625 | 5687 | 5.00016445501 |
| NM_002336    | LRP6  | 2918 | 2959 | 7.40221415911 |
| NM_002336    | LRP6  | 1126 | 1185 | 6.66926616489 |
| NM_002336    | LRP6  | 390  | 508  | 7.40623175928 |
| NM_002336    | LRP6  | 2643 | 2718 | 6.66925943406 |
| NM_002336    | LRP6  | 6310 | 6374 | 7.08028606422 |
| NM_002336    | LRP6  | 275  | 355  | 5.08412991408 |
| NM_002336    | LRP6  | 3272 | 3344 | 5.08412991408 |
| NM_002336    | LRP6  | 4169 | 4220 | 7.40605800896 |
| NM_002336    | LRP6  | 574  | 659  | 6.66926616512 |
| NM_002336    | LRP6  | 6890 | 6966 | 6.66524856494 |
| NM_002336    | LRP6  | 2061 | 2104 | 6.66524856494 |
| NM_002336    | LRP6  | 1946 | 2037 | 6.66926616512 |
| NM_002336    | LRP6  | 4551 | 4654 | 5.08430366439 |
| NM_002336    | LRP6  | 9725 | 9774 | 5.08028606422 |
| NM_002336    | LRP6  | 4071 | 4161 | 5.08430342848 |
| NM_002336    | LRP6  | 3520 | 3640 | 7.89165858645 |
| NM_002336    | LRP6  | 4262 | 4352 | 7.08430366439 |
| NM_002336    | LRP6  | 8986 | 9044 | 7.08412991408 |
| NM_002336    | LRP6  | 4373 | 4465 | 6.6692659292  |
| NM_002336    | LRP6  | 1209 | 1290 | 6.66926616512 |
| NM_002336    | LRP6  | 1685 | 1816 | 6.08430366439 |

|           |           |      |      |               |               |
|-----------|-----------|------|------|---------------|---------------|
| NM_002336 | LRP6      | 2130 | 2209 | 7.08429693334 |               |
| NM_002336 | LRP6      | 4692 | 4781 | 6.66926615757 |               |
| NM_002336 | LRP6      | 2272 | 2490 | 7.66926616512 |               |
| NM_002336 | LRP6      | 6520 | 6609 | 5.08028606422 |               |
| NM_002336 | LRP6      | 825  | 958  | 8.08430366439 |               |
| NM_002336 | LRP6      | 3023 | 3188 | 7.08430366439 |               |
| NM_002336 | LRP6      | 1350 | 1475 | 6.66926616512 |               |
| NM_012406 | PRDM4     | 1115 | 1162 | 8.30576959216 |               |
| NM_012406 | PRDM4     | 1453 | 1496 | 7.38589120137 |               |
| NM_012406 | PRDM4     | 1334 | 1431 | 8.97487129471 |               |
| NM_012406 | PRDM4     | 897  | 946  | 8.38589120137 |               |
| NM_012406 | PRDM4     | 1691 | 1761 | 9.38990880154 |               |
| NM_014520 | MYBBP1A   | 2871 | 2931 | 6.54555786912 |               |
| NM_014520 | MYBBP1A   | 2951 | 3026 | 8.87150356418 |               |
| NM_014520 | MYBBP1A   | 846  | 889  | 6.46543625991 |               |
| NM_014520 | MYBBP1A   | 3063 | 3111 | 6.5495754693  |               |
| NM_014520 | MYBBP1A   | 1299 | 1342 | 8.1345377341  |               |
| NM_014520 | MYBBP1A   | 1421 | 1522 | 8.5495754693  |               |
| NM_014520 | MYBBP1A   | 1734 | 1820 | 8.5495754693  |               |
| NM_014520 | MYBBP1A   | 146  | 240  | 8.87150356418 |               |
| NM_014520 | MYBBP1A   | 3300 | 3400 | 6.5495754693  |               |
| NM_014520 | MYBBP1A   | 1101 | 1190 | 8.13453796247 |               |
| NM_014520 | MYBBP1A   | 1383 | 1420 | 6.46543625991 |               |
| NM_014520 | MYBBP1A   | 1991 | 2032 | 7.54555786912 |               |
| NM_014520 | MYBBP1A   | 2082 | 2257 | 10.0090070879 |               |
| NM_014520 | MYBBP1A   | 1878 | 1935 | 7.54940171898 |               |
| NM_014520 | MYBBP1A   | 435  | 555  | 8.13453797002 |               |
| NM_014520 | MYBBP1A   | 648  | 835  | 9.13453797002 |               |
| NM_005455 | ZRANB2    | 954  | 1021 | 4.02464654394 |               |
| NM_005455 | ZRANB2    | 788  | 838  | 4.02063567482 |               |
| NM_005455 | ZRANB2    | 1697 | 1756 | 4.02465326744 |               |
| NM_005455 | ZRANB2    | 2869 | 2964 | 6.83200819705 |               |
| NM_005455 | ZRANB2    | 868  | 920  | 5.02063567482 |               |
| NM_005455 | ZRANB2    | 487  | 604  | 5.02465327498 |               |
| NM_005455 | ZRANB2    | 372  | 446  | 5.60961577571 |               |
| NM_005452 | WDR46     | 1398 | 1452 | 5.82259572413 |               |
| NM_005452 | WDR46     | 1483 | 1551 | 5.23763323095 |               |
| NM_005452 | WDR46     | 741  | 777  | 5.15349402157 |               |
| NM_005452 | WDR46     | 1060 | 1128 | 5.23361563078 |               |
| NM_005452 | WDR46     | 1339 | 1393 | 5.82259573168 |               |
| NM_005452 | WDR46     | 810  | 999  | 5.82259573168 |               |
| NM_005452 | WDR46     | 1136 | 1229 | 6.23763323096 |               |
| NM_005451 | PDLIM7    | 1242 | 1343 | 9.69082802421 |               |
| NM_080821 | C20orf108 |      | 422  | 480           | 7.04031134902 |
| NM_080821 | C20orf108 |      | 634  | 689           | 7.04031134881 |
| NM_080821 | C20orf108 |      | 2502 | 2597          | 7.45534861239 |
| NM_080821 | C20orf108 |      | 1646 | 1737          | 5.45534211725 |
| NM_080820 | DTD1      | 327  | 391  | 2.92997636166 |               |
| NM_080820 | DTD1      | 239  | 321  | 4.93399396183 |               |
| NM_080822 | OVCA2     | 695  | 783  | 10.5123262963 |               |

|           |          |      |      |               |               |
|-----------|----------|------|------|---------------|---------------|
| NM_080822 | OVCA2    | 491  | 539  | 10.5123262963 |               |
| NM_003677 | DENR     | 2068 | 2137 | 2.16224996301 |               |
| NM_003677 | DENR     | 1770 | 1825 | 3.07828450394 |               |
| NM_003677 | DENR     | 1525 | 1596 | 3.74738621405 |               |
| NM_003677 | DENR     | 1705 | 1770 | 3.74738621405 |               |
| NM_003677 | DENR     | 110  | 194  | 3.74336861387 |               |
| NM_003677 | DENR     | 2423 | 2486 | 2.15840611315 |               |
| NM_003677 | DENR     | 1133 | 1179 | 2.16242371333 |               |
| NM_003677 | DENR     | 1185 | 1280 | 2.16242371333 |               |
| NM_003676 | DEGS1    | 65   | 101  | 6.95766667287 |               |
| NM_003676 | DEGS1    | 195  | 939  | 14.0973917756 |               |
| NM_003676 | DEGS1    | 944  | 1414 | 12.6582801413 |               |
| NM_003670 | BHLHE40  | 1878 | 1996 | 6.05066738992 |               |
| NM_003670 | BHLHE40  | 1728 | 1791 | 3.72873905911 |               |
| NM_003670 | BHLHE40  | 1263 | 1316 | 3.64460008565 |               |
| NM_003670 | BHLHE40  | 1393 | 1522 | 6.31370179575 |               |
| NM_003670 | BHLHE40  | 1638 | 1686 | 3.72472169486 |               |
| NM_003670 | BHLHE40  | 2665 | 2773 | 3.72873929503 |               |
| NM_018407 | LAPTM4B  | 1774 | 1843 | 6.29303072277 |               |
| NM_018407 | LAPTM4B  | 1922 | 1974 | 6.29303095847 |               |
| NM_018407 | LAPTM4B  | 1987 | 2055 | 6.29303095869 |               |
| NM_018407 | LAPTM4B  | 346  | 399  | 4.29285720837 |               |
| NM_018407 | LAPTM4B  | 402  | 1090 | 11.4223139756 |               |
| NM_018407 | LAPTM4B  | 1111 | 1466 | 9.84761981037 |               |
| NM_018407 | LAPTM4B  | 2076 | 2203 | 7.61495905358 |               |
| NM_018407 | LAPTM4B  | 232  | 346  | 5.29303095869 |               |
| NM_018407 | LAPTM4B  | 1567 | 1773 | 7.46295596013 |               |
| NM_018405 | C17orf79 |      | 215  | 290           | 4.30745369866 |
| NM_018405 | C17orf79 |      | 613  | 695           | 6.30745369866 |
| NM_018405 | C17orf79 |      | 346  | 477           | 7.47737870011 |
| NM_018403 | DCP1A    | 349  | 399  | 5.73364767733 |               |
| NM_005638 | VAMP7    | 256  | 309  | 8.22318827127 |               |
| NM_005638 | VAMP7    | 1320 | 1355 | 7.1392228122  |               |
| NM_005638 | VAMP7    | 610  | 648  | 6.1392228122  |               |
| NM_005632 | SOLH     | 4411 | 4449 | 9.47340407838 |               |
| NM_005632 | SOLH     | 1753 | 1811 | 7.88861532776 |               |
| NM_005632 | SOLH     | 2857 | 2917 | 8.88861532043 |               |
| NM_005632 | SOLH     | 1888 | 1963 | 8.88459772781 |               |
| NM_005632 | SOLH     | 2113 | 2190 | 8.88861532797 |               |
| NM_005632 | SOLH     | 2982 | 3070 | 9.88861532798 |               |
| NM_005632 | SOLH     | 2649 | 2773 | 10.69597025   |               |
| NM_005632 | SOLH     | 4537 | 4644 | 8.88861532798 |               |
| NM_005632 | SOLH     | 4652 | 4724 | 7.88861532798 |               |
| NM_005631 | SMO      | 1307 | 1366 | 7.12307935201 |               |
| NM_005631 | SMO      | 1651 | 1725 | 7.12709695218 |               |
| NM_005631 | SMO      | 3024 | 3088 | 7.12307935201 |               |
| NM_005631 | SMO      | 1868 | 1906 | 7.0429577428  |               |
| NM_005631 | SMO      | 2064 | 2140 | 7.12709695218 |               |
| NM_005631 | SMO      | 2597 | 2671 | 7.12709671627 |               |
| NM_005631 | SMO      | 2728 | 2825 | 8.71205945291 |               |

|           |         |      |      |               |
|-----------|---------|------|------|---------------|
| NM_005631 | SMO     | 1000 | 1083 | 9.12709695196 |
| NM_005631 | SMO     | 1912 | 1989 | 7.12709022113 |
| NM_005631 | SMO     | 1201 | 1297 | 8.12709695196 |
| NM_005637 | SS18    | 169  | 232  | 7.71438189382 |
| NM_005637 | SS18    | 3231 | 3306 | 8.29934440187 |
| NM_005637 | SS18    | 1963 | 2061 | 7.71438166545 |
| NM_152716 | PATL1   | 2383 | 2424 | 5.68359396114 |
| NM_152716 | PATL1   | 2620 | 2677 | 4.76773317053 |
| NM_152716 | PATL1   | 3118 | 3175 | 4.76772643947 |
| NM_152716 | PATL1   | 4002 | 4066 | 7.08966126542 |
| NM_152716 | PATL1   | 3816 | 3857 | 4.76755942021 |
| NM_152716 | PATL1   | 630  | 677  | 4.68359396114 |
| NM_152716 | PATL1   | 828  | 884  | 4.76773317052 |
| NM_152716 | PATL1   | 136  | 229  | 5.76773317053 |
| NM_152716 | PATL1   | 1166 | 1246 | 6.3526956637  |
| NM_152716 | PATL1   | 250  | 289  | 6.35252192093 |
| NM_152716 | PATL1   | 2155 | 2231 | 7.08966126542 |
| NM_152716 | PATL1   | 2256 | 2362 | 5.76755942021 |
| NM_152716 | PATL1   | 1357 | 1484 | 7.35269567125 |
| NM_152716 | PATL1   | 935  | 1024 | 4.76773316298 |
| NM_152716 | PATL1   | 447  | 614  | 7.76773317053 |
| NM_152716 | PATL1   | 3583 | 3649 | 5.76772643947 |
| NM_152716 | PATL1   | 1567 | 1704 | 7.57508809259 |
| NM_032221 | CHD6    | 6067 | 6128 | 5.21136761009 |
| NM_032221 | CHD6    | 1567 | 1636 | 5.20752376023 |
| NM_032221 | CHD6    | 2196 | 2252 | 5.12740215102 |
| NM_032221 | CHD6    | 4768 | 4828 | 6.21153462935 |
| NM_032221 | CHD6    | 5617 | 5692 | 5.12740215102 |
| NM_032221 | CHD6    | 2740 | 2830 | 5.21136761009 |
| NM_032221 | CHD6    | 8395 | 8460 | 6.21136761009 |
| NM_032227 | TMEM164 | 3860 | 3929 | 10.5811836674 |
| NM_032227 | TMEM164 | 4842 | 4893 | 11.5771727983 |
| NM_032227 | TMEM164 | 4651 | 4696 | 10.5810166481 |
| NM_032227 | TMEM164 | 2684 | 2733 | 12.1661528992 |
| NM_032227 | TMEM164 | 4533 | 4608 | 10.5811836674 |
| NM_032227 | TMEM164 | 4317 | 4404 | 11.5811903985 |
| NM_032227 | TMEM164 | 5045 | 5119 | 10.4970511891 |
| NM_032227 | TMEM164 | 2499 | 2567 | 12.5811903985 |
| NM_032227 | TMEM164 | 2615 | 2650 | 11.4970511891 |
| NM_032227 | TMEM164 | 748  | 880  | 13.7511153999 |
| NM_032227 | TMEM164 | 948  | 1052 | 12.9031184933 |
| NM_032227 | TMEM164 | 1503 | 1613 | 10.5811903985 |
| NM_032227 | TMEM164 | 3222 | 3285 | 10.5810166481 |
| NM_032227 | TMEM164 | 447  | 555  | 12.5811903985 |
| NM_032227 | TMEM164 | 1222 | 1339 | 10.5811903985 |
| NM_032227 | TMEM164 | 1408 | 1471 | 10.5810166481 |
| NM_032227 | TMEM164 | 265  | 385  | 11.5811903985 |
| NM_032227 | TMEM164 | 5344 | 5491 | 12.9031184933 |
| NM_032227 | TMEM164 | 2185 | 2249 | 11.5811836674 |
| NM_152718 | VWCE    | 1595 | 1651 | 5.25707963982 |

|              |           |      |      |               |               |
|--------------|-----------|------|------|---------------|---------------|
| NM_152718    | VWCE      | 2061 | 2165 | 5.25725339014 |               |
| NM_152718    | VWCE      | 1451 | 1489 | 5.25323578996 |               |
| NM_152718    | VWCE      | 1741 | 1778 | 6.17311418075 |               |
| NM_152718    | VWCE      | 939  | 988  | 5.25725338259 |               |
| NM_152718    | VWCE      | 1654 | 1728 | 7.57918148503 |               |
| NM_152718    | VWCE      | 95   | 164  | 5.25725339014 |               |
| NM_152718    | VWCE      | 2466 | 2525 | 7.57918147748 |               |
| NM_152718    | VWCE      | 2532 | 2652 | 7.57918148503 |               |
| NM_152718    | VWCE      | 3018 | 3077 | 6.25725338992 |               |
| NM_152718    | VWCE      | 2843 | 2903 | 5.25725338259 |               |
| NM_152718    | VWCE      | 2679 | 2771 | 6.84221589086 |               |
| NM_152718    | VWCE      | 2220 | 2365 | 6.25725339014 |               |
| NM_152718    | VWCE      | 738  | 845  | 5.25725338259 |               |
| NM_152718    | VWCE      | 475  | 609  | 7.57918148503 |               |
| NM_152718    | VWCE      | 1973 | 2047 | 7.25725339014 |               |
| NM_001077628 | APH1A     | 590  | 666  | 9.1243281981  |               |
| NM_001077628 | APH1A     | 1235 | 1342 | 8.70929069882 |               |
| NM_001077628 | APH1A     | 1604 | 1645 | 7.1243281981  |               |
| NM_001077628 | APH1A     | 1491 | 1601 | 7.86129379226 |               |
| NM_001077628 | APH1A     | 671  | 727  | 6.53936569738 |               |
| NM_001077628 | APH1A     | 1342 | 1399 | 7.1243281981  |               |
| NM_001077628 | APH1A     | 387  | 559  | 9.78729321082 |               |
| NM_001077628 | APH1A     | 754  | 1103 | 11.2672861519 |               |
| NM_138701    | C7orf11   | 430  | 481  | 5.5897743592  |               |
| NM_138701    | C7orf11   | 45   | 128  | 5.58978085434 |               |
| NM_138701    | C7orf11   | 609  | 680  | 5.58576349008 |               |
| NM_138701    | C7orf11   | 514  | 567  | 4.50564188087 |               |
| NM_138701    | C7orf11   | 723  | 824  | 6.58978109026 |               |
| NM_001144929 | NKIRAS2   | 330  | 395  | 6.0285657109  |               |
| NM_001144929 | NKIRAS2   | 238  | 288  | 6.02839869163 |               |
| NM_001144929 | NKIRAS2   | 167  | 228  | 5.02455484178 |               |
| NM_001167972 | TRMT2B    | 326  | 391  | 8.08984278193 |               |
| NM_001167972 | TRMT2B    | 1336 | 1402 | 7.50470653111 |               |
| NM_001167972 | TRMT2B    | 2513 | 2537 | 6.42074107204 |               |
| NM_001167972 | TRMT2B    | 1245 | 1292 | 6.50487355037 |               |
| NM_001167972 | TRMT2B    | 850  | 939  | 7.50488004551 |               |
| NM_003844    | TNFRSF10A |      | 1171 | 1249          | 9.9139530672  |
| NM_003844    | TNFRSF10A |      | 1335 | 1405          | 7.9141268173  |
| NM_003844    | TNFRSF10A |      | 673  | 721           | 8.82998760814 |
| NM_003844    | TNFRSF10A |      | 964  | 1087          | 9.49908931069 |
| NM_003844    | TNFRSF10A |      | 381  | 444           | 9.49908258719 |
| NM_003844    | TNFRSF10A |      | 832  | 954           | 11.2360549124 |
| NM_003844    | TNFRSF10A |      | 206  | 272           | 8.82998760814 |
| NM_024109    | METTTL22  | 1180 | 1266 | 6.28685479881 |               |
| NM_032045    | KREMEN1   | 929  | 993  | 9.54589347298 |               |
| NM_015698    | GPKOW     | 199  | 291  | 6.48964418305 |               |
| NM_015698    | GPKOW     | 890  | 978  | 5.48963768792 |               |
| NM_015695    | BRPF3     | 2094 | 2164 | 6.73134872095 |               |
| NM_015695    | BRPF3     | 3251 | 3316 | 6.72733785183 |               |
| NM_015695    | BRPF3     | 5099 | 5143 | 5.73135545178 |               |

|              |         |      |      |               |
|--------------|---------|------|------|---------------|
| NM_015695    | BRPF3   | 4308 | 4397 | 7.731355452   |
| NM_015695    | BRPF3   | 1068 | 1138 | 6.73135544445 |
| NM_015695    | BRPF3   | 4883 | 4965 | 6.731355452   |
| NM_015695    | BRPF3   | 845  | 940  | 8.53871037406 |
| NM_015695    | BRPF3   | 5036 | 5089 | 6.731355452   |
| NM_015695    | BRPF3   | 4728 | 4802 | 5.73134872095 |
| NM_015695    | BRPF3   | 5310 | 5345 | 6.72733785183 |
| NM_015695    | BRPF3   | 194  | 247  | 5.64721624262 |
| NM_015695    | BRPF3   | 2773 | 2816 | 5.73118170169 |
| NM_015695    | BRPF3   | 284  | 428  | 7.731355452   |
| NM_015695    | BRPF3   | 1736 | 1785 | 7.31614420241 |
| NM_015695    | BRPF3   | 5577 | 5825 | 9.97928296545 |
| NM_015695    | BRPF3   | 645  | 722  | 6.731355452   |
| NM_015695    | BRPF3   | 5428 | 5474 | 5.64721624262 |
| NM_015697    | COQ2    | 366  | 423  | 6.91366397042 |
| NM_015697    | COQ2    | 460  | 554  | 8.91367070147 |
| NM_015697    | COQ2    | 792  | 852  | 7.91349695116 |
| NM_015690    | STK36   | 4746 | 4840 | 9.65482550934 |
| NM_015690    | STK36   | 2582 | 2661 | 9.65482527342 |
| NM_212552    | BOLA3   | 325  | 429  | 5.09970909505 |
| NM_212552    | BOLA3   | 95   | 148  | 4.36273676983 |
| NM_212552    | BOLA3   | 194  | 279  | 2.77778099262 |
| NM_152444    | PTGR2   | 360  | 454  | 7.76858998047 |
| NM_152444    | PTGR2   | 515  | 573  | 6.76841623016 |
| NM_152444    | PTGR2   | 944  | 993  | 5.68445077109 |
| NM_152444    | PTGR2   | 247  | 288  | 5.76841623016 |
| NM_212554    | METTL10 | 306  | 342  | 8.858864788   |
| NM_212554    | METTL10 | 347  | 395  | 7.94299726633 |
| NM_212554    | METTL10 | 598  | 658  | 6.858864788   |
| NM_212554    | METTL10 | 809  | 844  | 6.93898639721 |
| NM_212554    | METTL10 | 420  | 508  | 8.94300399716 |
| NM_212554    | METTL10 | 116  | 180  | 8.52796649788 |
| NM_001144072 | UBAC2   | 1336 | 1378 | 5.59874900994 |
| NM_001144072 | UBAC2   | 484  | 537  | 6.59892275271 |
| NM_001144072 | UBAC2   | 2020 | 2088 | 5.59892276026 |
| NM_001144072 | UBAC2   | 2210 | 2286 | 6.59892276025 |
| NM_001144072 | UBAC2   | 1639 | 1705 | 6.59892276026 |
| NM_001144072 | UBAC2   | 1904 | 1996 | 9.18388526098 |
| NM_001144072 | UBAC2   | 2482 | 2546 | 6.59892252434 |
| NM_001144072 | UBAC2   | 564  | 710  | 9.50581335587 |
| NM_001144072 | UBAC2   | 1799 | 1903 | 8.18388526098 |
| NM_001144072 | UBAC2   | 1384 | 1558 | 9.18388526098 |
| NM_001144072 | UBAC2   | 755  | 1291 | 11.2136326044 |
| NM_016004    | IFT52   | 1398 | 1458 | 8.01783041664 |
| NM_016004    | IFT52   | 1523 | 1585 | 6.43688551587 |
| NM_016001    | UTP18   | 514  | 580  | 6.2363721762  |
| NM_016001    | UTP18   | 1314 | 1392 | 6.23637889971 |
| NM_016001    | UTP18   | 1447 | 1492 | 4.65141617062 |
| NM_016001    | UTP18   | 802  | 883  | 5.65124265622 |
| NM_016002    | SCCPDH  | 1418 | 1477 | 7.32935086817 |

|           |          |      |      |               |               |
|-----------|----------|------|------|---------------|---------------|
| NM_016002 | SCCPDH   | 1081 | 1152 | 7.65127896306 |               |
| NM_016002 | SCCPDH   | 1801 | 1860 | 5.24521165879 |               |
| NM_016002 | SCCPDH   | 700  | 773  | 6.32935086063 |               |
| NM_016002 | SCCPDH   | 921  | 976  | 6.32934413712 |               |
| NM_016002 | SCCPDH   | 614  | 676  | 6.325333268   |               |
| NM_016002 | SCCPDH   | 1711 | 1754 | 5.32935086063 |               |
| NM_016002 | SCCPDH   | 1477 | 1508 | 6.325333268   |               |
| NM_016002 | SCCPDH   | 339  | 400  | 7.325333268   |               |
| NM_016002 | SCCPDH   | 783  | 832  | 6.91029576872 |               |
| NM_016002 | SCCPDH   | 540  | 584  | 6.32934413712 |               |
| NM_016002 | SCCPDH   | 982  | 1039 | 6.91413961858 |               |
| NM_016002 | SCCPDH   | 1339 | 1417 | 7.32935086063 |               |
| NM_016002 | SCCPDH   | 1157 | 1271 | 8.13670579023 |               |
| NM_016002 | SCCPDH   | 858  | 911  | 7.325333268   |               |
| NM_016002 | SCCPDH   | 1579 | 1702 | 7.65127896306 |               |
| NM_015070 | ZC3H13   | 3385 | 3435 | 4.227580737   |               |
| NM_015071 | ARHGAP26 |      | 711  | 784           | 7.44856635212 |
| NM_015071 | ARHGAP26 |      | 3915 | 4004          | 7.44874010243 |
| NM_015071 | ARHGAP26 |      | 1267 | 1341          | 7.44472250226 |
| NM_015073 | SIPA1L3  | 1386 | 1438 | 8.70320991625 |               |
| NM_015073 | SIPA1L3  | 313  | 397  | 10.2881789121 |               |
| NM_015073 | SIPA1L3  | 947  | 997  | 9.69919904713 |               |
| NM_015073 | SIPA1L3  | 2871 | 2911 | 9.70320991625 |               |
| NM_015073 | SIPA1L3  | 3304 | 3407 | 8.70321664731 |               |
| NM_015073 | SIPA1L3  | 409  | 450  | 8.61907743792 |               |
| NM_015073 | SIPA1L3  | 2746 | 2805 | 8.70320991625 |               |
| NM_015073 | SIPA1L3  | 3078 | 3111 | 8.69919904713 |               |
| NM_015073 | SIPA1L3  | 5486 | 5552 | 8.69919904713 |               |
| NM_015073 | SIPA1L3  | 6554 | 6601 | 9.70321664731 |               |
| NM_015073 | SIPA1L3  | 3196 | 3288 | 9.70321664731 |               |
| NM_015073 | SIPA1L3  | 251  | 305  | 9.70321664708 |               |
| NM_015073 | SIPA1L3  | 4839 | 4895 | 9.70320991625 |               |
| NM_015073 | SIPA1L3  | 7863 | 7963 | 9.70321641139 |               |
| NM_015073 | SIPA1L3  | 2394 | 2454 | 8.69919904713 |               |
| NM_015073 | SIPA1L3  | 3675 | 3715 | 8.69919904713 |               |
| NM_015073 | SIPA1L3  | 2974 | 3056 | 8.70321664731 |               |
| NM_015073 | SIPA1L3  | 1960 | 2122 | 10.288179148  |               |
| NM_015073 | SIPA1L3  | 7695 | 7798 | 10.7032166473 |               |
| NM_015073 | SIPA1L3  | 2283 | 2391 | 9.70321664731 |               |
| NM_015076 | CDK19    | 2433 | 2489 | 8.7048265311  |               |
| NM_015076 | CDK19    | 5906 | 5967 | 7.96384333676 |               |
| NM_015076 | CDK19    | 242  | 287  | 6.29875922683 |               |
| NM_015076 | CDK19    | 904  | 938  | 6.3827246859  |               |
| NM_015076 | CDK19    | 1510 | 1550 | 6.38289820029 |               |
| NM_015076 | CDK19    | 6028 | 6090 | 6.38289842866 |               |
| NM_015076 | CDK19    | 1890 | 1921 | 7.29875922683 |               |
| NM_015076 | CDK19    | 5176 | 5258 | 6.38289843599 |               |
| NM_015076 | CDK19    | 4033 | 4111 | 7.37888083604 |               |
| NM_015076 | CDK19    | 5724 | 5762 | 6.29875922683 |               |
| NM_015076 | CDK19    | 1787 | 1865 | 8.38289843621 |               |



|              |           |      |      |                    |
|--------------|-----------|------|------|--------------------|
| NM_015076    | CDK19     | 5021 | 5159 | 9.55282343766      |
| NM_015076    | CDK19     | 3123 | 3185 | 7.38289843621      |
| NM_015076    | CDK19     | 3568 | 3641 | 6.37888083604      |
| NM_015076    | CDK19     | 3793 | 3873 | 8.3827246859       |
| NM_138358    | C19orf52  |      | 610  | 657 7.62416408428  |
| NM_173809    | BLOC1S2   | 295  | 377  | 6.18100363482      |
| NM_173809    | BLOC1S2   | 708  | 752  | 3.85890178961      |
| NM_173809    | BLOC1S2   | 75   | 134  | 5.44002044048      |
| NM_173809    | BLOC1S2   | 853  | 909  | 3.85890178961      |
| NM_173809    | BLOC1S2   | 461  | 570  | 6.18100363482      |
| NM_173804    | TMEM86B   | 1156 | 1247 | 11.2874268927      |
| NM_173804    | TMEM86B   | 1326 | 1365 | 10.6184989329      |
| NM_173804    | TMEM86B   | 1487 | 1581 | 10.7026381423      |
| NM_173804    | TMEM86B   | 596  | 664  | 11.287593912       |
| NM_173804    | TMEM86B   | 845  | 891  | 9.69862054213      |
| NM_001018136 | NME1-NME2 |      | 58   | 96 1.50458721337   |
| NM_001018136 | NME1-NME2 |      | 953  | 1046 4.58872642276 |
| NM_001018136 | NME1-NME2 |      | 411  | 500 4.17368892348  |
| NM_001018136 | NME1-NME2 |      | 574  | 756 6.04815804139  |
| NM_001018136 | NME1-NME2 |      | 210  | 400 6.04815804139  |
| NM_001018136 | NME1-NME2 |      | 104  | 209 3.58872642276  |
| NM_001018136 | NME1-NME2 |      | 763  | 951 6.34361392492  |
| NM_145754    | KIFC2     | 1264 | 1320 | 8.93807998541      |
| NM_001018056 | VLDLR     | 784  | 844  | 7.47988067197      |
| NM_001018056 | VLDLR     | 521  | 630  | 8.56401988135      |
| NM_033318    | C22orf32  |      | 264  | 301 5.32345042597  |
| NM_033318    | C22orf32  |      | 369  | 412 6.32345042597  |
| NM_030773    | TUBB1     | 640  | 670  | 7.07841450977      |
| NM_030773    | TUBB1     | 873  | 904  | 5.40931279966      |
| NM_030773    | TUBB1     | 299  | 319  | 5.40931279966      |
| NM_033315    | RASL10B   | 1355 | 1429 | 7.62763529888      |
| NM_033315    | RASL10B   | 1478 | 1529 | 6.62763529888      |
| NM_033316    | MFI2      | 1270 | 1326 | 8.8972295218       |
| NM_033316    | MFI2      | 305  | 355  | 8.3124407714       |
| NM_199054    | MKNK2     | 2985 | 3071 | 5.71372075651      |
| NM_199054    | MKNK2     | 1632 | 1681 | 4.12858450547      |
| NM_199054    | MKNK2     | 1050 | 1111 | 6.12875825579      |
| NM_199054    | MKNK2     | 2338 | 2401 | 4.12474065561      |
| NM_199054    | MKNK2     | 2095 | 2128 | 4.12875824824      |
| NM_199054    | MKNK2     | 1223 | 1278 | 5.12474065561      |
| NM_199054    | MKNK2     | 646  | 725  | 5.12875825579      |
| NM_199054    | MKNK2     | 321  | 386  | 5.71372075651      |
| NM_199054    | MKNK2     | 3670 | 3720 | 6.12875825579      |
| NM_199054    | MKNK2     | 1702 | 1763 | 5.12875825556      |
| NM_199054    | MKNK2     | 1384 | 1439 | 4.12474065561      |
| NM_199054    | MKNK2     | 3455 | 3546 | 4.12875825579      |
| NM_199054    | MKNK2     | 468  | 592  | 6.12875825579      |
| NM_199054    | MKNK2     | 2533 | 2670 | 5.12875825579      |
| NM_199054    | MKNK2     | 793  | 963  | 5.71372075651      |
| NM_001098817 | IN080C    | 815  | 857  | 6.13474693684      |

|              |          |      |      |               |               |
|--------------|----------|------|------|---------------|---------------|
| NM_001098817 | IN080C   | 404  | 467  | 7.80384841102 |               |
| NM_001098817 | IN080C   | 864  | 942  | 7.80384864694 |               |
| NM_001098813 | SEPT8    | 4181 | 4234 | 5.60092920322 |               |
| NM_001098813 | SEPT8    | 3769 | 3841 | 6.60093569835 |               |
| NM_001098813 | SEPT8    | 4101 | 4149 | 5.51679672489 |               |
| NM_001098813 | SEPT8    | 1528 | 1581 | 5.60076218395 |               |
| NM_000587    | C7       | 1409 | 1483 | 11.2321513187 |               |
| NM_024055    | SLC30A5  | 924  | 956  | 8.32227134836 |               |
| NM_024055    | SLC30A5  | 401  | 480  | 10.4064103218 |               |
| NM_001024946 | ASL      | 441  | 516  | 6.3964567115  |               |
| NM_001024946 | ASL      | 1020 | 1095 | 7.13342230567 |               |
| NM_001024946 | ASL      | 766  | 837  | 6.3964567115  |               |
| NM_001024946 | ASL      | 1115 | 1181 | 5.81149421078 |               |
| NM_001024946 | ASL      | 539  | 588  | 5.7273550014  |               |
| NM_001024946 | ASL      | 1405 | 1471 | 7.81149421078 |               |
| NM_001024946 | ASL      | 943  | 995  | 5.81148747973 |               |
| NM_001024946 | ASL      | 628  | 697  | 5.81149421078 |               |
| NM_001024946 | ASL      | 845  | 938  | 6.3964567115  |               |
| NM_001024946 | ASL      | 170  | 289  | 7.13342230567 |               |
| NM_021626    | SCPEP1   | 1129 | 1185 | 7.05391316798 |               |
| NM_021626    | SCPEP1   | 652  | 703  | 6.46895090318 |               |
| NM_021626    | SCPEP1   | 1353 | 1467 | 7.79087899807 |               |
| NM_021626    | SCPEP1   | 217  | 290  | 7.46895089563 |               |
| NM_021626    | SCPEP1   | 877  | 973  | 7.05391340389 |               |
| NM_021627    | SENP2    | 1129 | 1189 | 6.69932215172 |               |
| NM_021627    | SENP2    | 171  | 291  | 6.69949589449 |               |
| NM_021627    | SENP2    | 1781 | 1865 | 7.28044080258 |               |
| NM_021627    | SENP2    | 2707 | 2767 | 7.28445840253 |               |
| NM_021627    | SENP2    | 1639 | 1696 | 6.69948917098 |               |
| NM_021627    | SENP2    | 565  | 641  | 6.69547830186 |               |
| NM_017755    | NSUN2    | 975  | 1058 | 4.33399914174 |               |
| NM_017755    | NSUN2    | 1129 | 1207 | 4.33399890583 |               |
| NM_017755    | NSUN2    | 1788 | 1827 | 3.24985993237 |               |
| NM_017755    | NSUN2    | 200  | 261  | 4.33382539143 |               |
| NM_017755    | NSUN2    | 1209 | 1257 | 4.91878789215 |               |
| NM_017755    | NSUN2    | 1829 | 1900 | 4.33399914175 |               |
| NM_017755    | NSUN2    | 2409 | 2487 | 3.33382539143 |               |
| NM_017755    | NSUN2    | 2535 | 2603 | 3.3339991342  |               |
| NM_017755    | NSUN2    | 2790 | 2901 | 6.91896164247 |               |
| NM_017755    | NSUN2    | 3160 | 3293 | 3.33399914175 |               |
| NM_017755    | NSUN2    | 1488 | 1569 | 4.33399914175 |               |
| NM_017755    | NSUN2    | 815  | 953  | 5.33399914175 |               |
| NM_017755    | NSUN2    | 1917 | 2194 | 6.65592723664 |               |
| NM_017754    | UHRF1BP1 |      | 1831 | 1896          | 7.42971888518 |
| NM_017754    | UHRF1BP1 |      | 3572 | 3606          | 6.34575342611 |
| NM_017754    | UHRF1BP1 |      | 2310 | 2359          | 7.42971888518 |
| NM_017754    | UHRF1BP1 |      | 2043 | 2085          | 6.34575342611 |
| NM_017754    | UHRF1BP1 |      | 4902 | 4937          | 7.42587503533 |
| NM_017754    | UHRF1BP1 |      | 243  | 275           | 6.42587503533 |
| NM_017754    | UHRF1BP1 |      | 5960 | 6025          | 8.01485513621 |

|           |              |      |               |               |
|-----------|--------------|------|---------------|---------------|
| NM_017754 | UHRF1BP1     | 5533 | 5626          | 6.42587503533 |
| NM_017754 | UHRF1BP1     | 3839 | 3914          | 7.42989262795 |
| NM_017754 | UHRF1BP1     | 8150 | 8253          | 7.42971888518 |
| NM_021622 | PLEKHA1 313  | 357  | 4.30781931471 |               |
| NM_021622 | PLEKHA1 41   | 124  | 5.97692102482 |               |
| NM_021622 | PLEKHA1 1235 | 1311 | 5.39195852387 |               |
| NM_021622 | PLEKHA1 204  | 263  | 5.30781931471 |               |
| NM_021622 | PLEKHA1 1747 | 1821 | 4.30781931471 |               |
| NM_021622 | PLEKHA1 726  | 789  | 5.39195179304 |               |
| NM_021622 | PLEKHA1 1411 | 1478 | 5.39195179304 |               |
| NM_021622 | PLEKHA1 2491 | 2564 | 5.97692102482 |               |
| NM_021622 | PLEKHA1 3507 | 3568 | 4.39195179304 |               |
| NM_021623 | PLEKHA2 3580 | 3622 | 7.37475058265 |               |
| NM_021623 | PLEKHA2 931  | 1028 | 8.3707332184  |               |
| NM_021623 | PLEKHA2 4171 | 4204 | 7.29061160919 |               |
| NM_017751 | SMPD4 1455   | 1569 | 9.82898193009 |               |
| NM_017751 | SMPD4 1141   | 1221 | 6.5070538352  |               |
| NM_017751 | SMPD4 689    | 760  | 9.31440875726 |               |
| NM_017751 | SMPD4 778    | 844  | 10.0920163359 |               |
| NM_017751 | SMPD4 1274   | 1364 | 9.82898193009 |               |
| NM_017751 | SMPD4 1047   | 1119 | 8.5070538352  |               |
| NM_017751 | SMPD4 2686   | 2758 | 8.5070538352  |               |
| NM_017751 | SMPD4 2762   | 2799 | 6.50705382766 |               |
| NM_017751 | SMPD4 1578   | 1644 | 8.09201610001 |               |
| NM_017751 | SMPD4 151    | 211  | 6.50704710415 |               |
| NM_017751 | SMPD4 376    | 413  | 7.42291462582 |               |
| NM_017751 | SMPD4 1368   | 1440 | 8.5070538352  |               |
| NM_017751 | SMPD4 3627   | 3809 | 9.5070538352  |               |
| NM_017751 | SMPD4 1775   | 1832 | 6.50705382766 |               |
| NM_017751 | SMPD4 1648   | 1768 | 8.09201633593 |               |
| NM_017751 | SMPD4 231    | 364  | 8.5070538352  |               |
| NM_017751 | SMPD4 413    | 571  | 9.82898193009 |               |
| NM_017751 | SMPD4 3327   | 3585 | 9.31440875726 |               |
| NM_017751 | SMPD4 3051   | 3137 | 8.5070538352  |               |
| NM_017751 | SMPD4 3150   | 3270 | 10.4139444308 |               |
| NM_017751 | SMPD4 571    | 688  | 8.82898193009 |               |
| NM_017751 | SMPD4 2482   | 2669 | 10.2074935533 |               |
| NM_017751 | SMPD4 947    | 1022 | 6.5070538352  |               |
| NM_017751 | SMPD4 2089   | 2434 | 10.8289819301 |               |
| NM_017751 | SMPD4 1876   | 2067 | 9.96648545384 |               |
| NM_017750 | RETSAT 1514  | 1554 | 5.6683428882  |               |
| NM_017750 | RETSAT 1100  | 1189 | 7.99027098331 |               |
| NM_017750 | RETSAT 854   | 896  | 7.66834288842 |               |
| NM_017750 | RETSAT 2328  | 2384 | 5.66834288842 |               |
| NM_017750 | RETSAT 646   | 681  | 7.6681691381  |               |
| NM_017750 | RETSAT 2251  | 2328 | 6.66834288842 |               |
| NM_017750 | RETSAT 806   | 854  | 5.66833615737 |               |
| NM_017750 | RETSAT 2638  | 2741 | 5.66834288842 |               |
| NM_017750 | RETSAT 1349  | 1507 | 7.99027098331 |               |
| NM_017750 | RETSAT 1566  | 1777 | 8.25330538914 |               |

|              |         |       |       |               |
|--------------|---------|-------|-------|---------------|
| NM_017750    | RETSAT  | 166   | 296   | 9.12777450706 |
| NM_017750    | RETSAT  | 457   | 640   | 9.25330538914 |
| NM_017750    | RETSAT  | 1193  | 1303  | 8.47569781048 |
| NM_017750    | RETSAT  | 300   | 441   | 8.25330538914 |
| NM_017750    | RETSAT  | 2514  | 2632  | 7.99027098331 |
| NM_017750    | RETSAT  | 1780  | 2033  | 9.36878260656 |
| NM_017759    | IN080D  | 12069 | 12112 | 9.28465399806 |
| NM_017759    | IN080D  | 7937  | 7990  | 9.36861945713 |
| NM_017759    | IN080D  | 11107 | 11157 | 10.2846539981 |
| NM_017759    | IN080D  | 292   | 349   | 10.3687864764 |
| NM_017758    | ALKBH5  | 3237  | 3306  | 6.67342414226 |
| NM_017758    | ALKBH5  | 3341  | 3404  | 4.67343086576 |
| NM_017758    | ALKBH5  | 1856  | 1931  | 5.67343087331 |
| NM_017758    | ALKBH5  | 0     | 84    | 6.25821962371 |
| NM_017758    | ALKBH5  | 1446  | 1488  | 6.25437577386 |
| NM_017758    | ALKBH5  | 861   | 929   | 6.25839336648 |
| NM_017758    | ALKBH5  | 1024  | 1070  | 4.58929166393 |
| NM_017758    | ALKBH5  | 1776  | 1829  | 5.66941327314 |
| NM_017758    | ALKBH5  | 1322  | 1443  | 7.9953589682  |
| NM_017758    | ALKBH5  | 1527  | 1661  | 7.84335587475 |
| NM_017758    | ALKBH5  | 2730  | 2835  | 5.67343087331 |
| NM_017758    | ALKBH5  | 2286  | 2427  | 7.25839337403 |
| NM_017758    | ALKBH5  | 1983  | 2212  | 7.48078579537 |
| NM_001042603 | KDM5A   | 6561  | 6636  | 6.3522967122  |
| NM_001042603 | KDM5A   | 2633  | 2725  | 6.93726594397 |
| NM_001042603 | KDM5A   | 2114  | 2164  | 6.9332483438  |
| NM_001042603 | KDM5A   | 4103  | 4148  | 6.26816423387 |
| NM_001042603 | KDM5A   | 7898  | 7954  | 5.34828584308 |
| NM_001042603 | KDM5A   | 5227  | 5270  | 6.93709219365 |
| NM_001042603 | KDM5A   | 227   | 309   | 5.35212969293 |
| NM_001042603 | KDM5A   | 2813  | 2857  | 6.93725921292 |
| NM_001042603 | KDM5A   | 916   | 986   | 5.34828584308 |
| NM_001042603 | KDM5A   | 4359  | 4425  | 6.35230344325 |
| NM_001042603 | KDM5A   | 2989  | 3055  | 6.93709219365 |
| NM_001042603 | KDM5A   | 618   | 672   | 5.35212969293 |
| NM_001042603 | KDM5A   | 2425  | 2503  | 7.35230344325 |
| NM_001042603 | KDM5A   | 1038  | 1089  | 5.34828584308 |
| NM_001042603 | KDM5A   | 6935  | 7053  | 6.93726594397 |
| NM_001042603 | KDM5A   | 2003  | 2081  | 6.35230344303 |
| NM_001042603 | KDM5A   | 2307  | 2413  | 6.93726570805 |
| NM_001042603 | KDM5A   | 1667  | 1783  | 7.35230344303 |
| NM_001042603 | KDM5A   | 4686  | 4806  | 7.67423153814 |
| NM_001042603 | KDM5A   | 3868  | 3963  | 6.93726594397 |
| NM_001135589 | GDAP2   | 455   | 512   | 6.77619982067 |
| NM_001135589 | GDAP2   | 359   | 451   | 7.860332299   |
| NM_178324    | SPTLC1  | 95    | 153   | 4.78203939668 |
| NM_178324    | SPTLC1  | 169   | 403   | 8.59341191891 |
| NM_178324    | SPTLC1  | 404   | 534   | 7.10798509174 |
| NM_001135586 | C5orf24 | 4893  | 4954  | 5.23402638458 |
| NM_018982    | YIPF1   | 1770  | 1818  | 8.08793743373 |

|              |         |      |      |                |
|--------------|---------|------|------|----------------|
| NM_018982    | YIPF1   | 776  | 847  | 8.00397197466  |
| NM_018982    | YIPF1   | 1019 | 1098 | 9.67306695371  |
| NM_018982    | YIPF1   | 1616 | 1687 | 8.08793743373  |
| NM_203286    | PVRL1   | 847  | 973  | 12.6622992132  |
| NM_203286    | PVRL1   | 434  | 496  | 12.34037111107 |
| NM_203286    | PVRL1   | 249  | 351  | 12.34037111183 |
| NM_203284    | RBPJ    | 5412 | 5483 | 7.4986126084   |
| NM_203284    | RBPJ    | 1468 | 1532 | 6.4986126084   |
| NM_203284    | RBPJ    | 600  | 667  | 6.49861238003  |
| NM_203284    | RBPJ    | 3292 | 3338 | 6.49459501577  |
| NM_203284    | RBPJ    | 4640 | 4713 | 6.49861238003  |
| NM_203284    | RBPJ    | 709  | 792  | 7.08357511667  |
| NM_203284    | RBPJ    | 5502 | 5559 | 5.49860588489  |
| NM_203284    | RBPJ    | 1554 | 1589 | 5.41447340656  |
| NM_203284    | RBPJ    | 2697 | 2738 | 6.49860588489  |
| NM_203284    | RBPJ    | 895  | 970  | 7.08357511667  |
| NM_203284    | RBPJ    | 3997 | 4120 | 7.08357511667  |
| NM_001172828 | YTHDF2  | 466  | 512  | 6.05501870701  |
| NM_001172828 | YTHDF2  | 407  | 461  | 6.05502543785  |
| NM_001172828 | YTHDF2  | 556  | 617  | 6.05502543807  |
| NM_001172828 | YTHDF2  | 2593 | 2632 | 6.05100783789  |
| NM_001172828 | YTHDF2  | 211  | 288  | 7.63998793879  |
| NM_001172828 | YTHDF2  | 1956 | 2082 | 6.63998793879  |
| NM_001172828 | YTHDF2  | 2337 | 2414 | 6.63998120773  |
| NM_001172828 | YTHDF2  | 1599 | 1713 | 6.05502543807  |
| NM_001172828 | YTHDF2  | 864  | 927  | 5.05100783789  |
| NM_001172828 | YTHDF2  | 1202 | 1453 | 8.63998793879  |
| NM_001100619 | CABLES1 | 3112 | 3166 | 5.02330936215  |
| NM_001201377 | ALDH7A1 | 629  | 702  | 2.76055464697  |
| NM_016098    | BRP44L  | 176  | 223  | 3.77604513886  |
| NM_016098    | BRP44L  | 341  | 388  | 3.7720277746   |
| NM_000249    | MLH1    | 1226 | 1275 | 7.78562949159  |
| NM_000249    | MLH1    | 1655 | 1709 | 6.78562949159  |
| NM_001199322 | MUTED   | 975  | 1028 | 4.59173636339  |
| NM_001199322 | MUTED   | 1954 | 2016 | 3.67570182246  |
| NM_000245    | MET     | 5324 | 5430 | 9.14413199605  |
| NM_000245    | MET     | 631  | 683  | 9.14413199605  |
| NM_000245    | MET     | 4871 | 4973 | 8.72909449677  |
| NM_000245    | MET     | 4721 | 4812 | 10.144131996   |
| NM_000245    | MET     | 4149 | 4223 | 10.6035636147  |
| NM_000245    | MET     | 4230 | 4314 | 10.7290944968  |
| NM_000245    | MET     | 2329 | 2393 | 9.46606009094  |
| NM_000245    | MET     | 2459 | 2511 | 8.14413199605  |
| NM_000245    | MET     | 116  | 178  | 9.14413199605  |
| NM_000245    | MET     | 3116 | 3152 | 8.72909426085  |
| NM_000245    | MET     | 2395 | 2447 | 8.144125265    |
| NM_000245    | MET     | 5518 | 5603 | 8.72892074645  |
| NM_000245    | MET     | 820  | 916  | 10.7290944968  |
| NM_000245    | MET     | 6175 | 6222 | 7.14395824573  |
| NM_000245    | MET     | 2721 | 2793 | 10.144131996   |

|              |        |      |      |               |
|--------------|--------|------|------|---------------|
| NM_000245    | MET    | 952  | 1099 | 11.6676939521 |
| NM_000245    | MET    | 3371 | 3592 | 11.8445717142 |
| NM_000245    | MET    | 3780 | 3896 | 10.3140569975 |
| NM_000245    | MET    | 3924 | 4125 | 11.0510225917 |
| NM_000245    | MET    | 2795 | 2927 | 10.8445717142 |
| NM_000245    | MET    | 5017 | 5054 | 7.14413199605 |
| NM_000245    | MET    | 397  | 622  | 11.144131996  |
| NM_000245    | MET    | 5871 | 5994 | 9.72909449677 |
| NM_000245    | MET    | 185  | 318  | 10.144131996  |
| NM_000245    | MET    | 2101 | 2323 | 11.2315948373 |
| NM_000245    | MET    | 2928 | 3108 | 11.0510225917 |
| NM_000245    | MET    | 6038 | 6128 | 8.14413199604 |
| NM_000245    | MET    | 6269 | 6443 | 9.14413199605 |
| NM_000245    | MET    | 4369 | 4536 | 9.72909449677 |
| NM_000245    | MET    | 5750 | 5856 | 10.144131996  |
| NM_000245    | MET    | 6462 | 6591 | 9.95148691811 |
| NM_000245    | MET    | 3165 | 3362 | 11.6676939521 |
| NM_000245    | MET    | 2518 | 2721 | 11.3920595095 |
| NM_000245    | MET    | 4586 | 4719 | 9.46606009094 |
| NM_000245    | MET    | 3597 | 3755 | 10.7290944968 |
| NM_000245    | MET    | 697  | 807  | 10.4660600909 |
| NM_000245    | MET    | 1913 | 2094 | 10.9514869181 |
| NM_000245    | MET    | 1102 | 1898 | 13.4660600909 |
| NM_000712    | BLVRA  | 383  | 491  | 8.5059462313  |
| NM_000712    | BLVRA  | 660  | 707  | 7.18401813619 |
| NM_000712    | BLVRA  | 296  | 344  | 6.18000053624 |
| NM_000712    | BLVRA  | 712  | 763  | 5.09987892703 |
| NM_000712    | BLVRA  | 129  | 265  | 5.18401813641 |
| NM_000240    | MAOA   | 2546 | 2584 | 3.91124887697 |
| NM_000240    | MAOA   | 3001 | 3063 | 4.91526647692 |
| NM_000240    | MAOA   | 1546 | 1585 | 3.91509272683 |
| NM_000240    | MAOA   | 2194 | 2299 | 4.91526647714 |
| NM_000240    | MAOA   | 2078 | 2132 | 3.9152664696  |
| NM_000240    | MAOA   | 2493 | 2546 | 3.83112726776 |
| NM_000240    | MAOA   | 1880 | 1950 | 3.91526647692 |
| NM_000240    | MAOA   | 1964 | 2061 | 3.91526647714 |
| NM_000715    | C4BPA  | 2123 | 2192 | 8.68519893605 |
| NM_000715    | C4BPA  | 53   | 119  | 8.5476954123  |
| NM_000715    | C4BPA  | 1537 | 1831 | 10.7803561691 |
| NM_000715    | C4BPA  | 1834 | 1994 | 8.03312223947 |
| NM_000715    | C4BPA  | 766  | 920  | 9.22576731741 |
| NM_000715    | C4BPA  | 920  | 1475 | 11.2030472409 |
| NM_000715    | C4BPA  | 187  | 729  | 11.0586573316 |
| NM_145201    | NAPRT1 | 950  | 1007 | 10.9514519579 |
| NM_145201    | NAPRT1 | 1528 | 1612 | 10.9514519579 |
| NM_001130481 | VRK2   | 767  | 801  | 4.95175722945 |
| NM_145207    | SPATA5 | 5070 | 5139 | 9.08309032794 |
| NM_145206    | VTI1A  | 373  | 444  | 5.02526982401 |
| NM_006166    | NFYB   | 901  | 988  | 5.55396101511 |
| NM_006166    | NFYB   | 1062 | 1088 | 3.54995014599 |

|           |         |      |      |               |
|-----------|---------|------|------|---------------|
| NM_006164 | NFE2L2  | 2727 | 2811 | 3.70334015091 |
| NM_006164 | NFE2L2  | 1251 | 1310 | 4.28830265164 |
| NM_006164 | NFE2L2  | 1452 | 1541 | 5.70334015092 |
| NM_006164 | NFE2L2  | 1080 | 1124 | 2.70333341986 |
| NM_006164 | NFE2L2  | 658  | 751  | 3.70334015092 |
| NM_006164 | NFE2L2  | 1920 | 1993 | 4.28830265164 |
| NM_006164 | NFE2L2  | 2337 | 2411 | 3.703339915   |
| NM_006164 | NFE2L2  | 533  | 582  | 4.70334015091 |
| NM_006164 | NFE2L2  | 2662 | 2712 | 4.7031664006  |
| NM_006164 | NFE2L2  | 1390 | 1433 | 2.7031664006  |
| NM_006164 | NFE2L2  | 1153 | 1236 | 4.28830265163 |
| NM_006164 | NFE2L2  | 2039 | 2156 | 5.0252682458  |
| NM_006164 | NFE2L2  | 1546 | 1717 | 5.0252682458  |
| NM_006164 | NFE2L2  | 595  | 653  | 4.28830265163 |
| NM_006164 | NFE2L2  | 2517 | 2614 | 3.70334015092 |
| NM_006164 | NFE2L2  | 1747 | 1876 | 4.70334015092 |
| NM_006164 | NFE2L2  | 826  | 1065 | 6.61023074652 |
| NM_021140 | KDM6A   | 2780 | 2850 | 7.49784999265 |
| NM_021140 | KDM6A   | 4839 | 4925 | 7.49784999265 |
| NM_021140 | KDM6A   | 3846 | 3938 | 9.086830086   |
| NM_021140 | KDM6A   | 4652 | 4734 | 7.5018673569  |
| NM_021140 | KDM6A   | 585  | 693  | 8.50186759282 |
| NM_003442 | ZNF143  | 78   | 132  | 6.57821921171 |
| NM_003441 | ZNF141  | 260  | 301  | 10.764963037  |
| NM_022362 | MMS19   | 1274 | 1349 | 8.41880232687 |
| NM_022362 | MMS19   | 2740 | 2800 | 8.41880232687 |
| NM_022362 | MMS19   | 1658 | 1695 | 6.41879559582 |
| NM_022362 | MMS19   | 1360 | 1423 | 7.4147847267  |
| NM_022362 | MMS19   | 1212 | 1267 | 8.00376482759 |
| NM_022362 | MMS19   | 2604 | 2664 | 7.41880209095 |
| NM_022362 | MMS19   | 3069 | 3163 | 6.41880232687 |
| NM_022362 | MMS19   | 2402 | 2474 | 6.41880232687 |
| NM_022362 | MMS19   | 317  | 418  | 8.00376482737 |
| NM_022362 | MMS19   | 1492 | 1586 | 8.00376482759 |
| NM_022362 | MMS19   | 3357 | 3426 | 7.41879559582 |
| NM_022362 | MMS19   | 3200 | 3351 | 8.00376482759 |
| NM_022362 | MMS19   | 941  | 1131 | 9.58872732831 |
| NM_025054 | VCPIP1  | 992  | 1060 | 7.79162620126 |
| NM_025054 | VCPIP1  | 3114 | 3160 | 7.78761533214 |
| NM_025054 | VCPIP1  | 1725 | 1786 | 8.37642168272 |
| NM_025054 | VCPIP1  | 1547 | 1626 | 7.79163293231 |
| NM_025054 | VCPIP1  | 7905 | 7981 | 6.70749372293 |
| NM_025054 | VCPIP1  | 1150 | 1197 | 6.70749372293 |
| NM_025054 | VCPIP1  | 4126 | 4168 | 7.70749372293 |
| NM_025054 | VCPIP1  | 684  | 793  | 7.79163293231 |
| NM_025054 | VCPIP1  | 2329 | 2422 | 8.37659543304 |
| NM_016097 | IER3IP1 | 252  | 297  | 2.67325548742 |
| NM_016097 | IER3IP1 | 413  | 448  | 3.67324875637 |
| NM_016097 | IER3IP1 | 509  | 587  | 2.67325525151 |
| NM_016097 | IER3IP1 | 164  | 226  | 1.66923788725 |

|              |          |      |      |                    |
|--------------|----------|------|------|--------------------|
| NM_016097    | IER3IP1  | 53   | 142  | 3.25821125709      |
| NM_001080449 | DNA2     | 3042 | 3094 | 9.82541205278      |
| NM_001080449 | DNA2     | 92   | 164  | 9.82541205278      |
| NM_001080449 | DNA2     | 394  | 450  | 10.4143854226      |
| NM_001080449 | DNA2     | 1886 | 1948 | 9.74529044357      |
| NM_001080449 | DNA2     | 2644 | 2735 | 9.82925590263      |
| NM_001199140 | AMMECR1L |      | 3324 | 3374 6.57229709979 |
| NM_001199140 | AMMECR1L |      | 2712 | 2753 8.56845324993 |
| NM_001199140 | AMMECR1L |      | 3981 | 4065 8.15743311491 |
| NM_024908    | WDR76    | 1655 | 1716 | 8.82736522423      |
| NM_024908    | WDR76    | 197  | 242  | 8.82737171937      |
| NM_024908    | WDR76    | 1739 | 1799 | 7.82335435511      |
| NM_024907    | FBX017   | 779  | 824  | 7.46811125742      |
| NM_024907    | FBX017   | 496  | 553  | 7.46409365725      |
| NM_024907    | FBX017   | 2205 | 2265 | 8.05290000783      |
| NM_024907    | FBX017   | 641  | 716  | 8.0530737506       |
| NM_024902    | DNAJC22  | 337  | 400  | 9.80432977398      |
| NM_024902    | DNAJC22  | 1102 | 1154 | 9.54129536814      |
| NM_024902    | DNAJC22  | 1272 | 1315 | 8.21534967308      |
| NM_024902    | DNAJC22  | 1169 | 1196 | 8.13522806387      |
| NM_024902    | DNAJC22  | 935  | 981  | 9.80432953806      |
| NM_024902    | DNAJC22  | 1027 | 1066 | 8.13522806387      |
| NM_024902    | DNAJC22  | 520  | 580  | 7.2193605422       |
| NM_024902    | DNAJC22  | 266  | 315  | 8.21919352294      |
| NM_024902    | DNAJC22  | 657  | 881  | 10.6787988919      |
| NM_006380    | APPBP2   | 5573 | 5638 | 5.63156635973      |
| NM_006386    | DDX17    | 1569 | 1658 | 6.64097365921      |
| NM_006386    | DDX17    | 3350 | 3407 | 4.83344498683      |
| NM_006386    | DDX17    | 3556 | 3605 | 4.83344498683      |
| NM_006386    | DDX17    | 814  | 858  | 5.41858123765      |
| NM_006386    | DDX17    | 3733 | 3803 | 5.83361873715      |
| NM_006386    | DDX17    | 2423 | 2486 | 4.83361873715      |
| NM_006386    | DDX17    | 3981 | 4024 | 3.82960113698      |
| NM_006386    | DDX17    | 3808 | 3869 | 5.83361873715      |
| NM_006386    | DDX17    | 1951 | 1988 | 3.74947952776      |
| NM_006386    | DDX17    | 1525 | 1563 | 3.82960113698      |
| NM_006386    | DDX17    | 410  | 573  | 6.41858123787      |
| NM_006386    | DDX17    | 309  | 410  | 6.64097365921      |
| NM_006386    | DDX17    | 1735 | 1774 | 5.41857450682      |
| NM_006386    | DDX17    | 3229 | 3303 | 4.83361850123      |
| NM_006386    | DDX17    | 3891 | 3937 | 4.83361873715      |
| NM_006386    | DDX17    | 1313 | 1441 | 7.15554683204      |
| NM_006386    | DDX17    | 1228 | 1259 | 5.33444202849      |
| NM_006386    | DDX17    | 1451 | 1510 | 4.82960113698      |
| NM_006386    | DDX17    | 1793 | 1948 | 7.41858123787      |
| NM_006386    | DDX17    | 883  | 949  | 4.83344498683      |
| NM_006386    | DDX17    | 2529 | 2575 | 4.83344498683      |
| NM_006386    | DDX17    | 2829 | 2878 | 3.83361200609      |
| NM_006386    | DDX17    | 101  | 226  | 7.15554683204      |
| NM_006386    | DDX17    | 642  | 796  | 8.08154625059      |



|              |         |      |      |               |
|--------------|---------|------|------|---------------|
| NM_006386    | DDX17   | 2061 | 2173 | 5.41858123787 |
| NM_006386    | DDX17   | 2285 | 2399 | 4.83361873715 |
| NM_006386    | DDX17   | 951  | 1210 | 8.47747492692 |
| NM_006386    | DDX17   | 2882 | 3113 | 6.15554683204 |
| NM_006386    | DDX17   | 1662 | 1733 | 3.8336187296  |
| NM_006386    | DDX17   | 4362 | 4796 | 8.64097365921 |
| NM_006387    | CHERP   | 3512 | 3590 | 8.58330352618 |
| NM_006387    | CHERP   | 3153 | 3224 | 8.16826602689 |
| NM_006387    | CHERP   | 2533 | 2615 | 8.1682660269  |
| NM_006387    | CHERP   | 3409 | 3503 | 7.58330352596 |
| NM_006387    | CHERP   | 2900 | 2941 | 8.16825929585 |
| NM_006387    | CHERP   | 1265 | 1336 | 6.57928592601 |
| NM_006387    | CHERP   | 677  | 747  | 8.16826579098 |
| NM_006387    | CHERP   | 497  | 552  | 6.58330329026 |
| NM_006387    | CHERP   | 830  | 931  | 9.1682660269  |
| NM_006387    | CHERP   | 2322 | 2410 | 7.58330352618 |
| NM_006387    | CHERP   | 3650 | 3693 | 6.58312977586 |
| NM_006387    | CHERP   | 2004 | 2108 | 8.90523162107 |
| NM_006387    | CHERP   | 90   | 262  | 9.1682660269  |
| NM_006387    | CHERP   | 2685 | 2779 | 6.58330352618 |
| NM_006387    | CHERP   | 3941 | 4070 | 9.1682660269  |
| NM_006387    | CHERP   | 561  | 669  | 8.58330352618 |
| NM_006384    | CIB1    | 488  | 568  | 7.63575205856 |
| NM_006384    | CIB1    | 406  | 450  | 6.89878646417 |
| NM_006384    | CIB1    | 663  | 748  | 5.31382396367 |
| NM_006384    | CIB1    | 190  | 270  | 6.89878622847 |
| NM_006384    | CIB1    | 587  | 651  | 5.31382395612 |
| NM_199133    | FAM173B | 300  | 349  | 9.74250024    |
| NM_199133    | FAM173B | 453  | 509  | 10.3313065906 |
| NM_199133    | FAM173B | 729  | 818  | 9.74651784018 |
| NM_199133    | FAM173B | 510  | 580  | 11.0684459351 |
| NM_001085457 | CBWD6   | 813  | 894  | 7.07211363024 |
| NM_001085457 | CBWD6   | 1005 | 1067 | 7.48715785303 |
| NM_001085457 | CBWD6   | 244  | 302  | 6.48715786057 |
| NM_001085457 | CBWD6   | 370  | 442  | 6.48715786057 |
| NM_001085457 | CBWD6   | 37   | 224  | 8.80908595546 |
| NM_001085457 | CBWD6   | 449  | 531  | 7.0721203613  |
| NM_006389    | HYOU1   | 1525 | 1565 | 4.60238082518 |
| NM_006389    | HYOU1   | 2306 | 2370 | 5.92430915599 |
| NM_006389    | HYOU1   | 2370 | 2443 | 6.77230606254 |
| NM_006389    | HYOU1   | 4340 | 4434 | 5.6023810611  |
| NM_006389    | HYOU1   | 2894 | 2940 | 4.60237433005 |
| NM_006389    | HYOU1   | 4243 | 4339 | 5.6023810611  |
| NM_006389    | HYOU1   | 534  | 766  | 8.06181267974 |
| NM_006389    | HYOU1   | 1405 | 1478 | 5.18734356182 |
| NM_006389    | HYOU1   | 2940 | 3017 | 3.60220731078 |
| NM_006389    | HYOU1   | 241  | 497  | 8.12594301716 |
| NM_006389    | HYOU1   | 2569 | 2724 | 7.06181267974 |
| NM_006389    | HYOU1   | 4501 | 4613 | 6.18734356182 |
| NM_006389    | HYOU1   | 3970 | 4116 | 7.06181267974 |

|              |         |      |      |                |
|--------------|---------|------|------|----------------|
| NM_006389    | HYOU1   | 3069 | 3267 | 6.77230606254  |
| NM_006389    | HYOU1   | 1705 | 2116 | 8.40973598316  |
| NM_006389    | HYOU1   | 1196 | 1404 | 7.92430915599  |
| NM_006389    | HYOU1   | 1568 | 1676 | 6.40973598316  |
| NM_006389    | HYOU1   | 3315 | 3480 | 6.6023810611   |
| NM_006389    | HYOU1   | 768  | 1168 | 7.50927165671  |
| NM_006389    | HYOU1   | 2725 | 2880 | 6.92430915599  |
| NM_006389    | HYOU1   | 2469 | 2566 | 5.92430915599  |
| NM_006389    | HYOU1   | 3497 | 3922 | 8.30282077924  |
| NM_001161662 | WWC1    | 2157 | 2258 | 10.6701711748  |
| NM_001161662 | WWC1    | 361  | 438  | 8.50024593746  |
| NM_001161662 | WWC1    | 3459 | 3524 | 9.08520867388  |
| NM_001161662 | WWC1    | 555  | 628  | 7.50024617338  |
| NM_001161662 | WWC1    | 3676 | 3759 | 8.50024617338  |
| NM_001161662 | WWC1    | 3588 | 3640 | 8.50023944233  |
| NM_001161662 | WWC1    | 2897 | 3019 | 9.0852086741   |
| NM_001161662 | WWC1    | 3961 | 4026 | 8.50024617338  |
| NM_001161662 | WWC1    | 640  | 697  | 8.50024593746  |
| NM_001161662 | WWC1    | 816  | 893  | 8.50024617338  |
| NM_001161662 | WWC1    | 3261 | 3318 | 8.50024617316  |
| NM_001161662 | WWC1    | 313  | 352  | 7.50007242306  |
| NM_001161662 | WWC1    | 1445 | 1533 | 10.0852086741  |
| NM_001161662 | WWC1    | 2306 | 2354 | 8.50024616583  |
| NM_001161662 | WWC1    | 3769 | 3835 | 7.49622857321  |
| NM_001161662 | WWC1    | 2539 | 2580 | 7.416106964    |
| NM_001161662 | WWC1    | 973  | 1053 | 7.50024617338  |
| NM_001161662 | WWC1    | 1069 | 1241 | 9.82217426827  |
| NM_001161662 | WWC1    | 914  | 972  | 8.50007242306  |
| NM_001161662 | WWC1    | 2599 | 2663 | 7.49622857321  |
| NM_001161662 | WWC1    | 143  | 271  | 8.50024617338  |
| NM_001161662 | WWC1    | 1958 | 2112 | 10.3076010954  |
| NM_001161662 | WWC1    | 1687 | 1848 | 9.82217426827  |
| NM_001161662 | WWC1    | 3030 | 3173 | 10.5002461734  |
| NM_000675    | ADORA2A | 2191 | 2250 | 10.5668690551  |
| NM_001185    | AZGP1   | 685  | 723  | 1.89971898379  |
| NM_001185    | AZGP1   | 378  | 422  | 1.90373634805  |
| NM_001185    | AZGP1   | 279  | 362  | 2.48869908469  |
| NM_001185    | AZGP1   | 442  | 531  | 2.48869908469  |
| NM_001185    | AZGP1   | 581  | 677  | 0.903562833647 |
| NM_001185    | AZGP1   | 89   | 206  | 4.22566467885  |
| NM_001185    | AZGP1   | 1133 | 1175 | 1.90356283365  |
| NM_001185    | AZGP1   | 746  | 854  | 3.22566467885  |
| NM_001184    | ATR     | 2023 | 2055 | 9.3049596838   |
| NM_001184    | ATR     | 7560 | 7637 | 8.38508129301  |
| NM_001184    | ATR     | 1288 | 1348 | 8.3049596838   |
| NM_001184    | ATR     | 3319 | 3383 | 9.38508129301  |
| NM_001184    | ATR     | 1597 | 1644 | 9.38909216213  |
| NM_001184    | ATR     | 3065 | 3134 | 9.97406115799  |
| NM_002710    | PPP1CC  | 1155 | 1208 | 0.884058314513 |
| NM_002710    | PPP1CC  | 336  | 404  | 3.46902105115  |

|              |         |      |      |               |
|--------------|---------|------|------|---------------|
| NM_002710    | PPP1CC  | 2077 | 2157 | 1.88405855043 |
| NM_002710    | PPP1CC  | 1436 | 1485 | 2.46500345098 |
| NM_002710    | PPP1CC  | 2278 | 2410 | 3.20598664532 |
| NM_002710    | PPP1CC  | 981  | 1078 | 4.34349016907 |
| NM_002710    | PPP1CC  | 1230 | 1360 | 4.46902105115 |
| NM_002710    | PPP1CC  | 409  | 588  | 4.79094914604 |
| NM_002710    | PPP1CC  | 1582 | 1710 | 2.88405855043 |
| NM_002710    | PPP1CC  | 1835 | 1927 | 3.88405855043 |
| NM_002710    | PPP1CC  | 2165 | 2237 | 2.46902081523 |
| NM_002710    | PPP1CC  | 588  | 960  | 5.52791474021 |
| NM_002712    | PPP1R7  | 1637 | 1685 | 4.50536065275 |
| NM_002712    | PPP1R7  | 1548 | 1582 | 4.50536065275 |
| NM_002712    | PPP1R7  | 1493 | 1532 | 5.58949313108 |
| NM_002712    | PPP1R7  | 1977 | 2016 | 4.58949313108 |
| NM_002712    | PPP1R7  | 2042 | 2075 | 3.58932611182 |
| NM_002712    | PPP1R7  | 1028 | 1153 | 5.58949986214 |
| NM_002712    | PPP1R7  | 1358 | 1433 | 3.58548226196 |
| NM_002715    | PPP2CA  | 1808 | 2021 | 8.52796350301 |
| NM_002715    | PPP2CA  | 391  | 452  | 7.44050066176 |
| NM_002715    | PPP2CA  | 681  | 767  | 7.6104256632  |
| NM_002715    | PPP2CA  | 789  | 1284 | 10.0552105059 |
| NM_002715    | PPP2CA  | 1288 | 1409 | 7.76242875665 |
| NM_002715    | PPP2CA  | 522  | 669  | 8.24785558382 |
| NM_002715    | PPP2CA  | 1481 | 1760 | 8.44050066176 |
| NM_002714    | PPP1R10 | 2399 | 2455 | 5.89244815148 |
| NM_002714    | PPP1R10 | 802  | 866  | 6.47741064488 |
| NM_002714    | PPP1R10 | 441  | 529  | 5.89227440139 |
| NM_002714    | PPP1R10 | 2191 | 2250 | 6.89244142065 |
| NM_002714    | PPP1R10 | 891  | 984  | 4.89227440139 |
| NM_002714    | PPP1R10 | 1831 | 1938 | 6.89244815171 |
| NM_002717    | PPP2R2A | 1615 | 1684 | 3.88266697929 |
| NM_002717    | PPP2R2A | 2104 | 2159 | 5.88266697196 |
| NM_002717    | PPP2R2A | 1913 | 1973 | 5.8826669795  |
| NM_002717    | PPP2R2A | 423  | 467  | 3.88249322919 |
| NM_002717    | PPP2R2A | 872  | 949  | 4.87864937934 |
| NM_002717    | PPP2R2A | 1310 | 1442 | 7.2045950744  |
| NM_002717    | PPP2R2A | 1214 | 1301 | 5.88266697951 |
| NM_002717    | PPP2R2A | 1065 | 1155 | 3.88266697951 |
| NM_002719    | PPP2R5C | 3525 | 3576 | 6.27373872752 |
| NM_002719    | PPP2R5C | 611  | 669  | 6.18959951814 |
| NM_002719    | PPP2R5C | 359  | 414  | 6.26972112735 |
| NM_002719    | PPP2R5C | 277  | 352  | 6.27373872752 |
| NM_001184735 | ASTN2   | 782  | 857  | 11.7054641864 |
| NM_001184735 | ASTN2   | 902  | 1002 | 12.0273922813 |
| NM_001184735 | ASTN2   | 1711 | 1748 | 11.2904264512 |
| NM_001184735 | ASTN2   | 1520 | 1568 | 9.70529043606 |
| NM_001184735 | ASTN2   | 1245 | 1361 | 11.2904266871 |
| NM_001184735 | ASTN2   | 1950 | 2047 | 9.70546418638 |
| NM_001184735 | ASTN2   | 2083 | 2188 | 11.2904266871 |
| NM_001184735 | ASTN2   | 1452 | 1518 | 9.70546418638 |

|              |          |      |      |               |               |
|--------------|----------|------|------|---------------|---------------|
| NM_001184735 | ASTN2    | 1751 | 1852 | 10.7054641864 |               |
| NM_001184735 | ASTN2    | 1378 | 1446 | 9.70546418638 |               |
| NM_001184735 | ASTN2    | 1009 | 1099 | 12.0273922813 |               |
| NM_024678    | NARS2    | 2163 | 2192 | 4.70890784    |               |
| NM_024678    | NARS2    | 1406 | 1461 | 4.7087343256  |               |
| NM_024675    | PALB2    | 2025 | 2079 | 5.53567498647 |               |
| NM_024675    | PALB2    | 3592 | 3671 | 5.61981419563 |               |
| NM_024675    | PALB2    | 2878 | 2941 | 5.61981395994 |               |
| NM_005845    | ABCC4    | 1767 | 1813 | 10.4335693791 |               |
| NM_005845    | ABCC4    | 714  | 780  | 11.4335761101 |               |
| NM_005845    | ABCC4    | 3093 | 3151 | 11.1705417043 |               |
| NM_005845    | ABCC4    | 1403 | 1452 | 9.84843985908 |               |
| NM_005845    | ABCC4    | 4196 | 4272 | 8.84861360185 |               |
| NM_005845    | ABCC4    | 1239 | 1302 | 8.8486136094  |               |
| NM_005845    | ABCC4    | 1825 | 1868 | 9.84459600923 |               |
| NM_005845    | ABCC4    | 4070 | 4189 | 8.84861360185 |               |
| NM_005845    | ABCC4    | 3225 | 3365 | 12.0185386108 |               |
| NM_005845    | ABCC4    | 3701 | 3780 | 10.8486136094 |               |
| NM_005845    | ABCC4    | 1540 | 1593 | 10.8486136094 |               |
| NM_005845    | ABCC4    | 5013 | 5065 | 10.8486136019 |               |
| NM_005845    | ABCC4    | 1595 | 1725 | 12.0185386108 |               |
| NM_005845    | ABCC4    | 1173 | 1229 | 9.8486136094  |               |
| NM_005845    | ABCC4    | 2818 | 2905 | 9.8486136094  |               |
| NM_005845    | ABCC4    | 2306 | 2564 | 13.4335761101 |               |
| NM_005845    | ABCC4    | 311  | 353  | 8.84860687835 |               |
| NM_005845    | ABCC4    | 1020 | 1064 | 8.84860687835 |               |
| NM_005845    | ABCC4    | 3815 | 3901 | 10.4335761101 |               |
| NM_005845    | ABCC4    | 2212 | 2291 | 11.8486136094 |               |
| NM_005845    | ABCC4    | 1987 | 2116 | 11.6559685315 |               |
| NM_005845    | ABCC4    | 3371 | 3560 | 10.4335761101 |               |
| NM_005845    | ABCC4    | 1892 | 1978 | 10.4335761101 |               |
| NM_005845    | ABCC4    | 1101 | 1143 | 10.8486133735 |               |
| NM_005845    | ABCC4    | 5207 | 5275 | 9.84861360185 |               |
| NM_005845    | ABCC4    | 5701 | 5783 | 8.84459600923 |               |
| NM_005845    | ABCC4    | 920  | 999  | 10.8486136094 |               |
| NM_005845    | ABCC4    | 3586 | 3680 | 10.4335761101 |               |
| NM_005845    | ABCC4    | 175  | 267  | 10.4335758742 |               |
| NM_005845    | ABCC4    | 2567 | 2759 | 12.1705417043 |               |
| NM_005845    | ABCC4    | 2910 | 3074 | 11.8486136094 |               |
| NM_005845    | ABCC4    | 461  | 586  | 12.1705417043 |               |
| NM_005843    | STAM2    | 1700 | 1760 | 7.10484162873 |               |
| NM_001130841 | RTCD1    | 534  | 649  | 6.57890277388 |               |
| NM_001130841 | RTCD1    | 997  | 1037 | 4.25295707882 |               |
| NM_001130841 | RTCD1    | 1937 | 2027 | 4.256974679   |               |
| NM_000904    | NQ02     | 417  | 472  | 6.0138917396  |               |
| NM_031925    | TMEM120A |      | 593  | 636           | 7.11779066796 |
| NM_031925    | TMEM120A |      | 1096 | 1160          | 6.5329951865  |
| NM_031925    | TMEM120A |      | 203  | 253           | 6.53300191001 |
| NM_031925    | TMEM120A |      | 158  | 203           | 6.53300191733 |
| NM_031925    | TMEM120A |      | 927  | 1013          | 8.53300191756 |

|              |          |      |      |     |                 |
|--------------|----------|------|------|-----|-----------------|
| NM_031925    | TMEM120A |      | 388  | 521 | 8.53300191756   |
| NM_031925    | TMEM120A |      | 778  | 855 | 7.53300191756   |
| NM_031921    | ATAD3B   | 1791 | 1824 |     | 6.72294362451   |
| NM_031921    | ATAD3B   | 1562 | 1593 |     | 8.30406227538   |
| NM_031921    | ATAD3B   | 1373 | 1427 |     | 8.30807987533   |
| NM_031921    | ATAD3B   | 776  | 815  |     | 7.63897816544   |
| NM_031921    | ATAD3B   | 2057 | 2144 |     | 8.30807987554   |
| NM_031921    | ATAD3B   | 219  | 286  |     | 6.63897816544   |
| NM_031921    | ATAD3B   | 1158 | 1242 |     | 7.72311737461   |
| NM_152384    | BBS5     | 1501 | 1539 |     | 7.744458318     |
| NM_152384    | BBS5     | 1614 | 1686 |     | 9.744458318     |
| NM_152384    | BBS5     | 1545 | 1589 |     | 7.66031910861   |
| NM_152384    | BBS5     | 2862 | 2969 |     | 10.5518132401   |
| NM_152384    | BBS5     | 1715 | 1745 |     | 7.74445808208   |
| NM_152384    | BBS5     | 1760 | 1824 |     | 7.744458318     |
| NM_001122671 | CCBL1    | 1173 | 1249 |     | 7.6954453289    |
| NM_001122671 | CCBL1    | 507  | 574  |     | 7.77957780723   |
| NM_003564    | TAGLN2   | 105  | 221  |     | 8.7096303426    |
| NM_003564    | TAGLN2   | 586  | 686  |     | 8.7096303426    |
| NM_003564    | TAGLN2   | 1320 | 1399 |     | 8.25019872396   |
| NM_003564    | TAGLN2   | 909  | 971  |     | 7.83516122468   |
| NM_003564    | TAGLN2   | 826  | 895  |     | 7.57212681885   |
| NM_003564    | TAGLN2   | 984  | 1211 |     | 10.6764634787   |
| NM_003564    | TAGLN2   | 70   | 102  |     | 6.25019199291   |
| NM_003564    | TAGLN2   | 1269 | 1311 |     | 6.83516098876   |
| NM_003564    | TAGLN2   | 1215 | 1251 |     | 5.25019848804   |
| NM_003564    | TAGLN2   | 232  | 581  |     | 10.4201237254   |
| NM_003564    | TAGLN2   | 689  | 814  |     | 7.83516122468   |
| NM_152388    | TMEM237  | 2524 | 2558 |     | 5.12725216468   |
| NM_152388    | TMEM237  | 1120 | 1192 |     | 6.71221466519   |
| NM_152388    | TMEM237  | 877  | 939  |     | 6.71204091509   |
| NM_152388    | TMEM237  | 941  | 1026 |     | 6.12725216468   |
| NM_001099339 | COMMD7   | 1289 | 1320 |     | 5.06296602162   |
| NM_001099339 | COMMD7   | 1742 | 1792 |     | 5.14693148068   |
| NM_001099339 | COMMD7   | 722  | 866  |     | 7.95446015306   |
| NM_001099339 | COMMD7   | 1022 | 1092 |     | 6.14308763083   |
| NM_003011    | SET      | 2691 | 2744 |     | 2.32417370372   |
| NM_003011    | SET      | 2166 | 2223 |     | 0.739211203004  |
| NM_003011    | SET      | 1151 | 1242 |     | 1.739211203     |
| NM_003011    | SET      | 1844 | 1946 |     | 1.739211203     |
| NM_003011    | SET      | 1752 | 1804 |     | 0.735193602831  |
| NM_003011    | SET      | 605  | 723  |     | 2.32417370372   |
| NM_003011    | SET      | 1001 | 1061 |     | -0.260788804545 |
| NM_003011    | SET      | 821  | 868  |     | 1.32399995341   |
| NM_003011    | SET      | 733  | 816  |     | -0.260788796996 |
| NM_003011    | SET      | 1283 | 1631 |     | 5.09676320762   |
| NM_003011    | SET      | 1947 | 2030 |     | 0.739211203004  |
| NM_003011    | SET      | 2824 | 2878 |     | -0.264806397169 |
| NM_003011    | SET      | 2549 | 2621 |     | 2.06113929789   |
| NM_003011    | SET      | 413  | 601  |     | 2.32417370372   |

|              |           |      |      |                    |
|--------------|-----------|------|------|--------------------|
| NM_003011    | SET       | 869  | 1000 | 0.739211203004     |
| NM_001099337 | COQ10A    | 574  | 634  | 8.1862789166       |
| NM_018209    | ARFGAP1   | 1399 | 1462 | 4.17807316285      |
| NM_018209    | ARFGAP1   | 252  | 283  | 3.17807316285      |
| NM_018209    | ARFGAP1   | 294  | 381  | 4.76705326352      |
| NM_018209    | ARFGAP1   | 1804 | 1868 | 3.1820905271       |
| NM_003468    | FZD5      | 3936 | 4009 | 6.84040786462      |
| NM_003468    | FZD5      | 1103 | 1162 | 7.84058161493      |
| NM_003468    | FZD5      | 4906 | 4942 | 6.83656401477      |
| NM_003468    | FZD5      | 27   | 72   | 5.75644240556      |
| NM_003468    | FZD5      | 6100 | 6148 | 5.84058161493      |
| NM_003468    | FZD5      | 1315 | 1424 | 8.42554411566      |
| NM_003468    | FZD5      | 2146 | 2217 | 6.84058161472      |
| NM_003468    | FZD5      | 1933 | 2030 | 7.42554411566      |
| NM_003468    | FZD5      | 5973 | 6013 | 6.84040786462      |
| NM_003468    | FZD5      | 1658 | 1778 | 7.42554411566      |
| NM_003468    | FZD5      | 2526 | 2662 | 8.42554411566      |
| NM_003468    | FZD5      | 5003 | 5088 | 7.42554411566      |
| NM_003468    | FZD5      | 224  | 268  | 6.75644240556      |
| NM_003468    | FZD5      | 1168 | 1294 | 8.42554411566      |
| NM_003468    | FZD5      | 3568 | 3676 | 7.84058161494      |
| NM_003468    | FZD5      | 94   | 142  | 6.84057488389      |
| NM_003468    | FZD5      | 1530 | 1634 | 7.42554411566      |
| NM_003468    | FZD5      | 3810 | 3873 | 6.83656401477      |
| NM_003468    | FZD5      | 2343 | 2446 | 9.01050661638      |
| NM_003468    | FZD5      | 4234 | 4387 | 7.84058161494      |
| NM_003468    | FZD5      | 540  | 704  | 8.42554411566      |
| NM_003468    | FZD5      | 4631 | 4697 | 5.84058161493      |
| NM_003468    | FZD5      | 5390 | 5473 | 6.84058161494      |
| NM_003468    | FZD5      | 5687 | 5755 | 6.84040786462      |
| NM_003468    | FZD5      | 5213 | 5271 | 7.42554411566      |
| NM_080664    | C14orf126 |      | 1042 | 1091 6.54443688426 |
| NM_080664    | C14orf126 |      | 919  | 1014 5.54443689181 |
| NM_015268    | DNAJC13   | 477  | 592  | 7.14125022907      |
| NM_015268    | DNAJC13   | 4610 | 4672 | 7.13723263645      |
| NM_015268    | DNAJC13   | 835  | 885  | 7.05711102723      |
| NM_015268    | DNAJC13   | 3465 | 3520 | 8.72219513717      |
| NM_015268    | DNAJC13   | 5283 | 5349 | 7.05711102723      |
| NM_015268    | DNAJC13   | 1604 | 1692 | 8.14125022907      |
| NM_015268    | DNAJC13   | 4675 | 4731 | 7.1410764863       |
| NM_015268    | DNAJC13   | 4417 | 4490 | 7.14125022907      |
| NM_003581    | NCK2      | 2072 | 2127 | 7.71569101382      |
| NM_003581    | NCK2      | 1506 | 1575 | 6.39376291893      |
| NM_003581    | NCK2      | 729  | 780  | 5.38974531876      |
| NM_003581    | NCK2      | 2304 | 2362 | 6.38974531876      |
| NM_003581    | NCK2      | 939  | 980  | 5.38974531876      |
| NM_003581    | NCK2      | 1978 | 2046 | 6.97872541965      |
| NM_003581    | NCK2      | 67   | 407  | 9.91732487499      |
| NM_003581    | NCK2      | 1655 | 1716 | 6.30962370955      |
| NM_018344    | SLC29A3   | 579  | 662  | 9.93551555038      |

|              |          |      |      |                   |
|--------------|----------|------|------|-------------------|
| NM_018344    | SLC29A3  | 1653 | 1723 | 8.93551555793     |
| NM_018344    | SLC29A3  | 882  | 903  | 8.85137634854     |
| NM_018344    | SLC29A3  | 1246 | 1303 | 8.85137634854     |
| NM_018344    | SLC29A3  | 689  | 770  | 8.93551555793     |
| NM_018344    | SLC29A3  | 984  | 1058 | 8.93149795775     |
| NM_018344    | SLC29A3  | 1059 | 1173 | 9.93551555793     |
| NM_018347    | C20orf29 |      | 590  | 665 10.2187445873 |
| NM_018347    | C20orf29 |      | 290  | 354 10.2187445876 |
| NM_001007027 | ALG8     | 630  | 657  | 8.57761476729     |
| NM_001007027 | ALG8     | 1650 | 1736 | 9.89954959323     |
| NM_001007027 | ALG8     | 1495 | 1596 | 11.2780612165     |
| NM_001007027 | ALG8     | 678  | 845  | 12.1011834544     |
| NM_001007027 | ALG8     | 1047 | 1201 | 11.5776214983     |
| NM_001007027 | ALG8     | 64   | 212  | 11.037053117      |
| NM_001007027 | ALG8     | 860  | 995  | 11.484512094      |
| NM_001007027 | ALG8     | 236  | 606  | 13.13221035       |
| NM_001007027 | ALG8     | 1212 | 1483 | 12.5318178087     |
| NM_015261    | NCAPD3   | 3733 | 3764 | 7.11746623753     |
| NM_015261    | NCAPD3   | 1427 | 1477 | 8.19758784674     |
| NM_015261    | NCAPD3   | 1829 | 1886 | 10.008960369      |
| NM_015261    | NCAPD3   | 3627 | 3699 | 8.78656794763     |
| NM_015261    | NCAPD3   | 2077 | 2129 | 8.78255034746     |
| NM_015261    | NCAPD3   | 1991 | 2072 | 7.20160521099     |
| NM_015261    | NCAPD3   | 794  | 861  | 8.20160543936     |
| NM_015261    | NCAPD3   | 2629 | 2683 | 9.20160521099     |
| NM_015261    | NCAPD3   | 729  | 789  | 7.20160544669     |
| NM_015261    | NCAPD3   | 3841 | 3905 | 7.20160543936     |
| NM_015261    | NCAPD3   | 4207 | 4293 | 9.52353353425     |
| NM_015261    | NCAPD3   | 2816 | 2916 | 9.20160521099     |
| NM_015261    | NCAPD3   | 2216 | 2304 | 8.78656121658     |
| NM_015261    | NCAPD3   | 2930 | 3001 | 8.20159871586     |
| NM_015261    | NCAPD3   | 626  | 724  | 8.78656121658     |
| NM_015261    | NCAPD3   | 2307 | 2437 | 9.5235335418      |
| NM_015261    | NCAPD3   | 4664 | 4752 | 8.78656121658     |
| NM_018340    | CPPED1   | 731  | 780  | 5.55698042266     |
| NM_018340    | CPPED1   | 627  | 693  | 5.55296282271     |
| NM_018340    | CPPED1   | 957  | 1056 | 6.55698042288     |
| NM_018340    | CPPED1   | 397  | 441  | 4.55296282271     |
| NM_018340    | CPPED1   | 563  | 606  | 4.55697369183     |
| NM_018340    | CPPED1   | 213  | 391  | 7.14194292361     |
| NM_018342    | TMEM144  | 1489 | 1552 | 12.118802307      |
| NM_018342    | TMEM144  | 1088 | 1134 | 9.52982220615     |
| NM_018342    | TMEM144  | 349  | 418  | 9.53383979877     |
| NM_012068    | ATF5     | 301  | 380  | 7.97053485661     |
| NM_012068    | ATF5     | 1916 | 1988 | 6.97036783734     |
| NM_012068    | ATF5     | 1692 | 1762 | 9.55550408838     |
| NM_012067    | AKR7A3   | 520  | 585  | 10.1205553883     |
| NM_012063    | DNM1L    | 1834 | 1884 | 5.66273209304     |
| NM_012063    | DNM1L    | 1938 | 2062 | 7.24770132482     |
| NM_012063    | DNM1L    | 806  | 859  | 8.24769459376     |

|              |          |      |      |                    |
|--------------|----------|------|------|--------------------|
| NM_012063    | DNM1L    | 1479 | 1512 | 5.66256507378      |
| NM_012063    | DNM1L    | 2261 | 2360 | 7.98466691876      |
| NM_012063    | DNM1L    | 1220 | 1317 | 7.98466691898      |
| NM_012063    | DNM1L    | 452  | 503  | 5.57859961471      |
| NM_012063    | DNM1L    | 743  | 798  | 5.57859961471      |
| NM_018200    | HMG20A   | 3003 | 3080 | 5.22625876254      |
| NM_018200    | HMG20A   | 2268 | 2317 | 4.14211955338      |
| NM_001145415 | SETDB1   | 857  | 934  | 6.36773751435      |
| NM_001145415 | SETDB1   | 1042 | 1130 | 6.95270025098      |
| NM_001145415 | SETDB1   | 2784 | 2890 | 5.36773775027      |
| NM_001145415 | SETDB1   | 1130 | 1186 | 6.36773775026      |
| NM_001145415 | SETDB1   | 488  | 544  | 5.36773774272      |
| NM_001145415 | SETDB1   | 2060 | 2172 | 5.36773775027      |
| NM_001145415 | SETDB1   | 3937 | 4027 | 5.36773775027      |
| NM_001145415 | SETDB1   | 218  | 310  | 5.36773775005      |
| NM_001145415 | SETDB1   | 763  | 842  | 5.36773774272      |
| NM_001145415 | SETDB1   | 3586 | 3705 | 5.36773101922      |
| NM_001145415 | SETDB1   | 1913 | 1973 | 5.36773101922      |
| NM_203456    | PPIE     | 200  | 304  | 5.74851653456      |
| NM_005157    | ABL1     | 3702 | 3757 | 8.92966930624      |
| NM_005157    | ABL1     | 1212 | 1281 | 8.92966929869      |
| NM_005157    | ABL1     | 192  | 232  | 8.92966929869      |
| NM_005157    | ABL1     | 3848 | 3909 | 8.3447068053       |
| NM_005157    | ABL1     | 2263 | 2336 | 7.26056759614      |
| NM_005157    | ABL1     | 1123 | 1176 | 8.92966257519      |
| NM_005157    | ABL1     | 5295 | 5378 | 8.92966930624      |
| NM_178135    | HSD17B13 |      | 2070 | 2114 10.3326232508 |
| NM_005153    | USP10    | 740  | 807  | 6.12243644571      |
| NM_005153    | USP10    | 3135 | 3174 | 5.12226942645      |
| NM_005153    | USP10    | 553  | 630  | 5.12226942645      |
| NM_005153    | USP10    | 2390 | 2433 | 6.12226942645      |
| NM_005153    | USP10    | 2688 | 2742 | 5.12226942645      |
| NM_005153    | USP10    | 937  | 1036 | 6.12226942645      |
| NM_005153    | USP10    | 821  | 885  | 5.12244294085      |
| NM_005153    | USP10    | 1925 | 2006 | 6.70740567726      |
| NM_005153    | USP10    | 2131 | 2280 | 7.92979809882      |
| NM_005153    | USP10    | 1728 | 1784 | 5.12226942645      |
| NM_005153    | USP10    | 1249 | 1317 | 6.12243644571      |
| NM_005153    | USP10    | 161  | 234  | 7.44437127165      |
| NM_005153    | USP10    | 475  | 549  | 5.12243644571      |
| NM_005153    | USP10    | 1064 | 1138 | 6.70739894643      |
| NM_005153    | USP10    | 2510 | 2647 | 7.12244317676      |
| NM_005153    | USP10    | 1477 | 1581 | 7.44437127165      |
| NM_005153    | USP10    | 3066 | 3127 | 5.11842557659      |
| NM_005151    | USP14    | 1875 | 1919 | 7.0322444288       |
| NM_005151    | USP14    | 1139 | 1194 | 7.35417925474      |
| NM_005151    | USP14    | 248  | 338  | 8.03225115986      |
| NM_005151    | USP14    | 782  | 850  | 7.61721366058      |
| NM_005151    | USP14    | 1060 | 1115 | 7.61721366058      |
| NM_005151    | USP14    | 1797 | 1848 | 6.02823355968      |



|           |       |      |      |               |
|-----------|-------|------|------|---------------|
| NM_005151 | USP14 | 667  | 719  | 7.61721366058 |
| NM_005151 | USP14 | 349  | 391  | 6.61721366057 |
| NM_005151 | USP14 | 550  | 666  | 6.61721366058 |
| NM_005151 | USP14 | 216  | 243  | 6.61319606041 |
| NM_005151 | USP14 | 1734 | 1794 | 6.02823355968 |
| NM_005151 | USP14 | 401  | 498  | 6.61721366058 |
| NM_005151 | USP14 | 1519 | 1598 | 6.61721365303 |
| NM_005151 | USP14 | 2081 | 2226 | 8.35417925474 |
| NM_005151 | USP14 | 1209 | 1316 | 7.35417925474 |
| NM_005151 | USP14 | 1598 | 1701 | 7.03225115986 |
| NM_005151 | USP14 | 2294 | 2469 | 8.2021761613  |
| NM_005151 | USP14 | 1331 | 1489 | 8.35417925474 |
| NM_005151 | USP14 | 2477 | 2548 | 7.0322444288  |
| NM_005151 | USP14 | 859  | 1009 | 8.49168277849 |
| NM_005151 | USP14 | 1978 | 2061 | 7.02823355968 |
| NM_005151 | USP14 | 2817 | 2852 | 4.94811195047 |
| NM_005159 | ACTC1 | 474  | 522  | 10.3396436784 |
| NM_005159 | ACTC1 | 798  | 835  | 10.6615717733 |
| NM_018206 | VPS35 | 1510 | 1565 | 4.72845020589 |
| NM_018206 | VPS35 | 356  | 404  | 3.0593487317  |
| NM_018206 | VPS35 | 2883 | 2968 | 4.14348794086 |
| NM_018206 | VPS35 | 2601 | 2679 | 4.72845044181 |
| NM_018206 | VPS35 | 1000 | 1076 | 5.14348794108 |
| NM_018206 | VPS35 | 696  | 768  | 4.14348794108 |
| NM_018206 | VPS35 | 1884 | 1965 | 4.72845044181 |
| NM_018206 | VPS35 | 466  | 518  | 3.14331419077 |
| NM_018206 | VPS35 | 1577 | 1679 | 6.14348794108 |
| NM_018206 | VPS35 | 2556 | 2589 | 3.0593487317  |
| NM_018206 | VPS35 | 602  | 686  | 5.14348794108 |
| NM_018206 | VPS35 | 1242 | 1315 | 4.14348794108 |
| NM_018206 | VPS35 | 407  | 461  | 5.14348794108 |
| NM_018206 | VPS35 | 3072 | 3126 | 4.72443284163 |
| NM_018206 | VPS35 | 229  | 348  | 6.84392765923 |
| NM_018206 | VPS35 | 1983 | 2106 | 6.14348794108 |
| NM_018206 | VPS35 | 1141 | 1221 | 5.95084286314 |
| NM_018206 | VPS35 | 2241 | 2332 | 4.72845043426 |
| NM_018206 | VPS35 | 1786 | 1858 | 4.72845044181 |
| NM_018206 | VPS35 | 2685 | 2775 | 4.14348794108 |
| NM_018206 | VPS35 | 135  | 222  | 5.14348794108 |
| NM_018206 | VPS35 | 784  | 992  | 6.84392765923 |
| NM_018206 | VPS35 | 2114 | 2210 | 4.14348794108 |
| NM_018206 | VPS35 | 1363 | 1475 | 5.14348794108 |
| NM_058004 | PI4KA | 2215 | 2287 | 6.55597717687 |
| NM_058004 | PI4KA | 5176 | 5243 | 4.97118842624 |
| NM_058004 | PI4KA | 3380 | 3425 | 5.97118169541 |
| NM_058004 | PI4KA | 1052 | 1152 | 5.96717082629 |
| NM_058004 | PI4KA | 945  | 1005 | 4.97118819054 |
| NM_058004 | PI4KA | 2505 | 2554 | 4.96717082629 |
| NM_058004 | PI4KA | 5307 | 5360 | 6.97118842646 |
| NM_058004 | PI4KA | 629  | 701  | 5.88704921708 |

|           |         |      |      |               |
|-----------|---------|------|------|---------------|
| NM_058004 | PI4KA   | 295  | 412  | 6.97118842646 |
| NM_058004 | PI4KA   | 4122 | 4169 | 5.97118169541 |
| NM_058004 | PI4KA   | 3088 | 3156 | 6.55615092718 |
| NM_058004 | PI4KA   | 3667 | 3721 | 6.97118169541 |
| NM_058004 | PI4KA   | 6122 | 6181 | 5.97118841891 |
| NM_058004 | PI4KA   | 6604 | 6653 | 5.97118842646 |
| NM_058004 | PI4KA   | 1575 | 1674 | 5.97118842646 |
| NM_058004 | PI4KA   | 3454 | 3524 | 6.97118842646 |
| NM_058004 | PI4KA   | 4205 | 4296 | 6.55615092718 |
| NM_058004 | PI4KA   | 771  | 842  | 6.55614419613 |
| NM_058004 | PI4KA   | 5496 | 5583 | 5.97118842646 |
| NM_058004 | PI4KA   | 5075 | 5124 | 5.96717082629 |
| NM_058004 | PI4KA   | 1811 | 1878 | 5.96717082629 |
| NM_058004 | PI4KA   | 4302 | 4370 | 5.97118819054 |
| NM_058004 | PI4KA   | 4000 | 4040 | 4.96717082629 |
| NM_058004 | PI4KA   | 2369 | 2445 | 6.97118842646 |
| NM_058004 | PI4KA   | 5772 | 5863 | 5.97118842646 |
| NM_058004 | PI4KA   | 480  | 564  | 4.97118841891 |
| NM_058004 | PI4KA   | 5634 | 5753 | 5.97118842646 |
| NM_058004 | PI4KA   | 5944 | 6103 | 7.77854334852 |
| NM_058004 | PI4KA   | 3766 | 3899 | 7.29311652135 |
| NM_058004 | PI4KA   | 6273 | 6399 | 6.55615092718 |
| NM_058004 | PI4KA   | 5396 | 5456 | 4.88704921708 |
| NM_058004 | PI4KA   | 2082 | 2168 | 6.97118842646 |
| NM_058004 | PI4KA   | 1161 | 1243 | 6.55615092718 |
| NM_015367 | BCL2L13 | 327  | 390  | 6.52192444904 |
| NM_015367 | BCL2L13 | 1885 | 1933 | 6.52175069872 |
| NM_015367 | BCL2L13 | 3002 | 3034 | 5.52175069872 |
| NM_015367 | BCL2L13 | 2308 | 2394 | 7.10688694976 |
| NM_015367 | BCL2L13 | 1071 | 1114 | 6.52191771798 |
| NM_015367 | BCL2L13 | 800  | 879  | 7.10688694975 |
| NM_001923 | DDB1    | 399  | 485  | 4.89651411167 |
| NM_001923 | DDB1    | 3207 | 3338 | 4.89651411167 |
| NM_001923 | DDB1    | 3936 | 4020 | 6.48147661239 |
| NM_001923 | DDB1    | 2508 | 2548 | 3.89651411145 |
| NM_001923 | DDB1    | 2000 | 2035 | 4.89634036135 |
| NM_001923 | DDB1    | 174  | 233  | 3.89651411145 |
| NM_001923 | DDB1    | 4290 | 4341 | 4.8924965115  |
| NM_001923 | DDB1    | 2059 | 2229 | 7.98397695292 |
| NM_001923 | DDB1    | 799  | 905  | 5.48147661239 |
| NM_001923 | DDB1    | 239  | 397  | 6.89651411167 |
| NM_001923 | DDB1    | 488  | 551  | 4.89650738062 |
| NM_001923 | DDB1    | 1657 | 1992 | 8.94090823103 |
| NM_001923 | DDB1    | 601  | 733  | 6.70386903373 |
| NM_001923 | DDB1    | 2230 | 2379 | 5.48147661239 |
| NM_001923 | DDB1    | 1003 | 1646 | 9.85071042206 |
| NM_001923 | DDB1    | 3344 | 3701 | 7.80340470728 |
| NM_001923 | DDB1    | 4110 | 4189 | 4.89651387575 |
| NM_001923 | DDB1    | 2612 | 3193 | 9.14444162511 |
| NM_001430 | EPAS1   | 2978 | 3082 | 7.38007894721 |

|           |       |      |      |               |
|-----------|-------|------|------|---------------|
| NM_001430 | EPAS1 | 4536 | 4606 | 7.11704454138 |
| NM_001430 | EPAS1 | 5038 | 5134 | 6.79511644649 |
| NM_001430 | EPAS1 | 3145 | 3208 | 5.79511644649 |
| NM_001430 | EPAS1 | 2580 | 2631 | 6.3800787113  |
| NM_001430 | EPAS1 | 2647 | 2696 | 5.79511644649 |
| NM_001430 | EPAS1 | 594  | 625  | 4.71097723711 |
| NM_001430 | EPAS1 | 2290 | 2332 | 4.79511644627 |
| NM_001430 | EPAS1 | 1425 | 1497 | 5.79511621057 |
| NM_001430 | EPAS1 | 1736 | 1784 | 6.38007894721 |
| NM_001430 | EPAS1 | 1632 | 1672 | 4.79494269618 |
| NM_001430 | EPAS1 | 4616 | 4713 | 6.79511644649 |
| NM_001430 | EPAS1 | 774  | 955  | 7.96504144794 |
| NM_001430 | EPAS1 | 4408 | 4452 | 5.71097723711 |
| NM_001430 | EPAS1 | 4262 | 4371 | 8.11704454138 |
| NM_001430 | EPAS1 | 3222 | 3250 | 4.71097723711 |
| NM_001430 | EPAS1 | 3829 | 4064 | 9.11704454138 |
| NM_001430 | EPAS1 | 3650 | 3747 | 7.60247136855 |
| NM_001430 | EPAS1 | 1948 | 2132 | 8.79511644649 |
| NM_001430 | EPAS1 | 464  | 585  | 6.79511644649 |
| NM_001430 | EPAS1 | 2700 | 2791 | 7.11704454138 |
| NM_001430 | EPAS1 | 639  | 737  | 7.38007894721 |
| NM_001430 | EPAS1 | 957  | 994  | 5.79109884632 |
| NM_001430 | EPAS1 | 1130 | 1197 | 6.38007221616 |
| NM_001430 | EPAS1 | 1507 | 1626 | 7.60247136855 |
| NM_001430 | EPAS1 | 3251 | 3542 | 8.88257928774 |
| NM_001430 | EPAS1 | 2826 | 2900 | 4.79511644649 |
| NM_001430 | EPAS1 | 4161 | 4235 | 4.79511621057 |
| NM_001430 | EPAS1 | 1201 | 1403 | 8.25454806513 |
| NM_001430 | EPAS1 | 4858 | 4954 | 6.38007894721 |
| NM_001921 | DCTD  | 455  | 503  | 5.76866024471 |
| NM_001921 | DCTD  | 545  | 607  | 5.18369774399 |
| NM_001921 | DCTD  | 1402 | 1461 | 6.18352399367 |
| NM_001921 | DCTD  | 846  | 908  | 5.76848649439 |
| NM_001921 | DCTD  | 911  | 944  | 4.17968014382 |
| NM_001921 | DCTD  | 354  | 446  | 5.76866024471 |
| NM_001921 | DCTD  | 1025 | 1152 | 5.76866024471 |
| NM_001921 | DCTD  | 195  | 339  | 6.99105266605 |
| NM_004152 | OAZ1  | 982  | 1066 | 5.59601304397 |
| NM_004152 | OAZ1  | 597  | 711  | 7.8184054653  |
| NM_004152 | OAZ1  | 804  | 982  | 8.71149026139 |
| NM_004152 | OAZ1  | 224  | 288  | 4.01105054325 |
| NM_004152 | OAZ1  | 341  | 452  | 7.59601304397 |
| NM_004152 | OAZ1  | 33   | 140  | 6.59601304397 |
| NM_004152 | OAZ1  | 711  | 783  | 5.59601304397 |
| NM_004152 | OAZ1  | 454  | 581  | 6.59601304397 |
| NM_012287 | ACAP2 | 310  | 367  | 6.44493663594 |
| NM_012287 | ACAP2 | 1470 | 1515 | 8.02588153671 |
| NM_012287 | ACAP2 | 1819 | 1900 | 6.44091903599 |
| NM_012287 | ACAP2 | 2173 | 2212 | 7.44476288584 |
| NM_012287 | ACAP2 | 2565 | 2612 | 6.44091903599 |

|              |        |      |      |               |
|--------------|--------|------|------|---------------|
| NM_001436    | FBL    | 67   | 117  | 4.68165815975 |
| NM_001436    | FBL    | 175  | 258  | 3.68183191007 |
| NM_001436    | FBL    | 962  | 1143 | 7.76929475132 |
| NM_001436    | FBL    | 318  | 537  | 7.58872250568 |
| NM_001436    | FBL    | 577  | 962  | 8.63602822046 |
| NM_001172643 | TK2    | 422  | 479  | 5.27989174141 |
| NM_012288    | TRAM2  | 5872 | 5931 | 5.28879913233 |
| NM_012288    | TRAM2  | 786  | 865  | 7.61073395827 |
| NM_012288    | TRAM2  | 2256 | 2309 | 6.204666654   |
| NM_012288    | TRAM2  | 6173 | 6227 | 6.204666654   |
| NM_012288    | TRAM2  | 4123 | 4175 | 6.86975076393 |
| NM_012288    | TRAM2  | 867  | 925  | 5.28478826321 |
| NM_012288    | TRAM2  | 6640 | 6701 | 6.87376836411 |
| NM_001383    | DPH1   | 1610 | 1658 | 9.08640581104 |
| NM_001383    | DPH1   | 1477 | 1536 | 9.08657283031 |
| NM_001383    | DPH1   | 445  | 534  | 9.08657955381 |
| NM_001382    | DPAGT1 | 1515 | 1565 | 8.90091377306 |
| NM_001382    | DPAGT1 | 289  | 409  | 10.2228418682 |
| NM_001382    | DPAGT1 | 417  | 493  | 10.9009137733 |
| NM_001382    | DPAGT1 | 1418 | 1505 | 10.485876274  |
| NM_001382    | DPAGT1 | 1980 | 2091 | 10.2228418682 |
| NM_001382    | DPAGT1 | 571  | 686  | 10.7082686953 |
| NM_001382    | DPAGT1 | 697  | 861  | 11.9009137733 |
| NM_001382    | DPAGT1 | 1249 | 1405 | 10.2228418682 |
| NM_001382    | DPAGT1 | 879  | 1239 | 12.9453078926 |
| NM_001382    | DPAGT1 | 1572 | 1929 | 13.2584657779 |
| NM_001380    | DOCK1  | 2962 | 3011 | 6.64512696926 |
| NM_001380    | DOCK1  | 2381 | 2434 | 5.64512696926 |
| NM_001380    | DOCK1  | 2092 | 2154 | 6.72926594273 |
| NM_001380    | DOCK1  | 2246 | 2313 | 7.31422867182 |
| NM_001380    | DOCK1  | 164  | 217  | 6.72524857847 |
| NM_001380    | DOCK1  | 6669 | 6717 | 6.72524857847 |
| NM_001380    | DOCK1  | 3133 | 3244 | 8.05119427353 |
| NM_001380    | DOCK1  | 467  | 560  | 6.72926617864 |
| NM_000527    | LDLR   | 3804 | 3855 | 5.30932429602 |
| NM_000527    | LDLR   | 4006 | 4057 | 4.22920268681 |
| NM_000527    | LDLR   | 4070 | 4112 | 4.31316814587 |
| NM_000527    | LDLR   | 3553 | 3694 | 7.63526999108 |
| NM_000527    | LDLR   | 4701 | 4757 | 6.31334189619 |
| NM_000527    | LDLR   | 2167 | 2245 | 6.63526999108 |
| NM_000527    | LDLR   | 1451 | 1499 | 4.30932429602 |
| NM_000527    | LDLR   | 3463 | 3527 | 4.31334188864 |
| NM_000527    | LDLR   | 2464 | 2520 | 5.31334189619 |
| NM_000527    | LDLR   | 2094 | 2150 | 6.89830439691 |
| NM_000527    | LDLR   | 3735 | 3800 | 6.31334189619 |
| NM_000527    | LDLR   | 2525 | 2680 | 6.63526999108 |
| NM_000527    | LDLR   | 132  | 234  | 5.89830439691 |
| NM_000527    | LDLR   | 824  | 1031 | 8.40080473744 |
| NM_000527    | LDLR   | 1500 | 1580 | 6.31334189619 |
| NM_000527    | LDLR   | 1749 | 1870 | 7.48326689763 |

|           |          |      |      |               |               |
|-----------|----------|------|------|---------------|---------------|
| NM_000527 | LDLR     | 5002 | 5266 | 8.40080473744 |               |
| NM_000527 | LDLR     | 334  | 615  | 8.89830439691 |               |
| NM_000527 | LDLR     | 4888 | 4971 | 6.31334189619 |               |
| NM_000527 | LDLR     | 1043 | 1221 | 8.2202324918  |               |
| NM_000527 | LDLR     | 1882 | 1977 | 5.31334189619 |               |
| NM_000527 | LDLR     | 1243 | 1317 | 5.89830439691 |               |
| NM_000527 | LDLR     | 2290 | 2340 | 4.31333516514 |               |
| NM_000527 | LDLR     | 2682 | 2880 | 7.12069681825 |               |
| NM_000527 | LDLR     | 1978 | 2069 | 6.31334189619 |               |
| NM_000527 | LDLR     | 4230 | 4289 | 4.30932429602 |               |
| NM_000527 | LDLR     | 615  | 797  | 7.12069681825 |               |
| NM_000527 | LDLR     | 1583 | 1749 | 7.63526999108 |               |
| NM_000527 | LDLR     | 2880 | 2994 | 5.31334166027 |               |
| NM_000520 | HEXA     | 462  | 523  | 7.47523305053 |               |
| NM_000520 | HEXA     | 902  | 969  | 6.15330495565 |               |
| NM_000520 | HEXA     | 1268 | 1333 | 6.15330495564 |               |
| NM_000520 | HEXA     | 552  | 629  | 8.15330495565 |               |
| NM_000520 | HEXA     | 1638 | 1804 | 9.06019555125 |               |
| NM_000520 | HEXA     | 1149 | 1258 | 7.15330495565 |               |
| NM_000520 | HEXA     | 1114 | 1145 | 6.15329822459 |               |
| NM_000520 | HEXA     | 630  | 833  | 8.9606598777  |               |
| NM_000520 | HEXA     | 2180 | 2273 | 6.14928735547 |               |
| NM_000520 | HEXA     | 1371 | 1428 | 6.73826745637 |               |
| NM_000520 | HEXA     | 254  | 334  | 5.15330495542 |               |
| NM_000520 | HEXA     | 1009 | 1113 | 8.47523305053 |               |
| NM_000520 | HEXA     | 1439 | 1629 | 8.61273657428 |               |
| NM_000521 | HEXB     | 168  | 250  | 6.67953004252 |               |
| NM_000521 | HEXB     | 902  | 1014 | 6.67953004274 |               |
| NM_000521 | HEXB     | 260  | 360  | 7.00145813763 |               |
| NM_000521 | HEXB     | 1812 | 1898 | 4.67953004274 |               |
| NM_000521 | HEXB     | 649  | 877  | 8.58642063835 |               |
| NM_000521 | HEXB     | 89   | 163  | 4.67935629242 |               |
| NM_000521 | HEXB     | 1020 | 1143 | 8.13896166138 |               |
| NM_000521 | HEXB     | 1161 | 1271 | 7.26449254346 |               |
| NM_000521 | HEXB     | 1308 | 1799 | 10.4608897563 |               |
| NM_000521 | HEXB     | 408  | 605  | 8.84945504418 |               |
| NM_182795 | NPM2     | 279  | 334  | 7.05647284393 |               |
| NM_015480 | PVRL3    | 1159 | 1199 | 8.96779884903 |               |
| NM_015480 | PVRL3    | 1447 | 1595 | 9.96779884925 |               |
| NM_015480 | PVRL3    | 1000 | 1140 | 10.6682385674 |               |
| NM_015480 | PVRL3    | 1205 | 1305 | 8.96779884925 |               |
| NM_015480 | PVRL3    | 621  | 909  | 11.55276135   |               |
| NM_015480 | PVRL3    | 310  | 507  | 10.4272304679 |               |
| NM_015480 | PVRL3    | 539  | 620  | 8.55276134997 |               |
| NM_015480 | PVRL3    | 1700 | 1821 | 8.96779884924 |               |
| NM_015482 | SLC22A23 |      | 792  | 835           | 8.04294155229 |
| NM_015482 | SLC22A23 |      | 5484 | 5525          | 7.04276780952 |
| NM_015482 | SLC22A23 |      | 863  | 956           | 8.03892395966 |
| NM_000528 | MAN2B1   | 1115 | 1191 | 6.54396161754 |               |
| NM_000528 | MAN2B1   | 1474 | 1540 | 8.12892411804 |               |

|           |        |      |      |               |
|-----------|--------|------|------|---------------|
| NM_000528 | MAN2B1 | 993  | 1092 | 8.86588971243 |
| NM_000528 | MAN2B1 | 1209 | 1246 | 6.53994401737 |
| NM_000528 | MAN2B1 | 2809 | 2906 | 8.54396161754 |
| NM_000528 | MAN2B1 | 867  | 923  | 8.12892411827 |
| NM_000528 | MAN2B1 | 1881 | 1989 | 9.54396161754 |
| NM_000528 | MAN2B1 | 1634 | 1720 | 7.54396161732 |
| NM_000528 | MAN2B1 | 280  | 462  | 9.71388661899 |
| NM_000528 | MAN2B1 | 2362 | 2459 | 8.12892411827 |
| NM_000528 | MAN2B1 | 469  | 637  | 9.12892411827 |
| NM_000528 | MAN2B1 | 2488 | 2582 | 8.12892411827 |
| NM_000528 | MAN2B1 | 705  | 854  | 8.54396161754 |
| NM_020812 | DOCK6  | 3334 | 3385 | 6.49005491657 |
| NM_020812 | DOCK6  | 2690 | 2734 | 6.49005491657 |
| NM_020812 | DOCK6  | 5506 | 5554 | 7.49005491657 |
| NM_020812 | DOCK6  | 4137 | 4206 | 6.49005491657 |
| NM_020812 | DOCK6  | 5738 | 5837 | 7.5741941184  |
| NM_020812 | DOCK6  | 532  | 582  | 6.57402037563 |
| NM_020812 | DOCK6  | 4392 | 4446 | 6.57402037563 |
| NM_005877 | SF3A1  | 1405 | 1454 | 5.94944756444 |
| NM_005877 | SF3A1  | 2941 | 2979 | 4.94542997181 |
| NM_005877 | SF3A1  | 2702 | 2754 | 6.53440334165 |
| NM_005877 | SF3A1  | 3244 | 3326 | 6.5344100727  |
| NM_005877 | SF3A1  | 1885 | 1931 | 4.94542997181 |
| NM_005877 | SF3A1  | 2279 | 2367 | 5.94944757199 |
| NM_005877 | SF3A1  | 588  | 642  | 6.53423632239 |
| NM_005877 | SF3A1  | 1509 | 1614 | 5.94944757199 |
| NM_005877 | SF3A1  | 283  | 396  | 6.94944757199 |
| NM_005877 | SF3A1  | 702  | 792  | 6.5344100727  |
| NM_020810 | TRMT5  | 4565 | 4598 | 8.46934770364 |
| NM_020810 | TRMT5  | 5211 | 5282 | 8.46952121804 |
| NM_020810 | TRMT5  | 1059 | 1143 | 9.46952145373 |
| NM_001655 | ARCN1  | 1147 | 1216 | 4.98141360109 |
| NM_001655 | ARCN1  | 566  | 621  | 2.65947877515 |
| NM_001655 | ARCN1  | 2943 | 3006 | 3.65947877515 |
| NM_001655 | ARCN1  | 3185 | 3229 | 2.6594855062  |
| NM_001655 | ARCN1  | 1549 | 1603 | 4.24444127587 |
| NM_001655 | ARCN1  | 3586 | 3677 | 3.57534629682 |
| NM_001655 | ARCN1  | 1503 | 1542 | 2.65546790603 |
| NM_001655 | ARCN1  | 3270 | 3339 | 2.65546790603 |
| NM_001655 | ARCN1  | 2618 | 2676 | 4.2444480067  |
| NM_001655 | ARCN1  | 2196 | 2281 | 3.6594855062  |
| NM_001655 | ARCN1  | 621  | 653  | 3.65931175589 |
| NM_001655 | ARCN1  | 2396 | 2451 | 3.65546790603 |
| NM_001655 | ARCN1  | 1289 | 1450 | 6.56637610181 |
| NM_001655 | ARCN1  | 763  | 810  | 2.65947877515 |
| NM_001655 | ARCN1  | 2466 | 2550 | 4.24444800693 |
| NM_001655 | ARCN1  | 381  | 553  | 6.24444800693 |
| NM_001655 | ARCN1  | 204  | 374  | 5.6594855062  |
| NM_001655 | ARCN1  | 2050 | 2140 | 3.6594855062  |
| NM_001655 | ARCN1  | 839  | 1123 | 6.35992522435 |

|              |       |       |       |               |
|--------------|-------|-------|-------|---------------|
| NM_001655    | ARCN1 | 3421  | 3514  | 4.65948549866 |
| NM_001655    | ARCN1 | 1877  | 1975  | 2.65948527029 |
| NM_001655    | ARCN1 | 1750  | 1865  | 4.24444800693 |
| NM_001654    | ARAF  | 320   | 436   | 9.93032486331 |
| NM_001654    | ARAF  | 2417  | 2482  | 7.93032486331 |
| NM_001654    | ARAF  | 1686  | 1738  | 8.93032486331 |
| NM_001654    | ARAF  | 2277  | 2320  | 6.84618565393 |
| NM_001654    | ARAF  | 1484  | 1570  | 8.51126976386 |
| NM_001654    | ARAF  | 1786  | 1858  | 6.92630726314 |
| NM_001654    | ARAF  | 442   | 624   | 9.73767978537 |
| NM_001657    | AREG  | 268   | 431   | 11.1927249781 |
| NM_001657    | AREG  | 439   | 611   | 10.3447280715 |
| NM_001657    | AREG  | 920   | 1022  | 8.02279997662 |
| NM_001657    | AREG  | 1048  | 1166  | 9.83015489868 |
| NM_001657    | AREG  | 134   | 263   | 9.83015489868 |
| NM_001657    | AREG  | 754   | 820   | 9.34472807151 |
| NM_020746    | MAVS  | 227   | 279   | 10.342696464  |
| NM_020746    | MAVS  | 1815  | 1861  | 8.5353415344  |
| NM_020746    | MAVS  | 8797  | 8847  | 7.53534130603 |
| NM_020746    | MAVS  | 10457 | 10498 | 7.53132394177 |
| NM_020746    | MAVS  | 815   | 872   | 9.85726962928 |
| NM_020746    | MAVS  | 1988  | 2045  | 7.53132394177 |
| NM_020746    | MAVS  | 2960  | 3013  | 8.53534154195 |
| NM_020746    | MAVS  | 1562  | 1597  | 7.45120233256 |
| NM_020746    | MAVS  | 5566  | 5655  | 9.12030380675 |
| NM_020746    | MAVS  | 10325 | 10384 | 7.53534154172 |
| NM_020746    | MAVS  | 7473  | 7510  | 7.53533481089 |
| NM_020746    | MAVS  | 4741  | 4807  | 7.53533481089 |
| NM_020746    | MAVS  | 1038  | 1089  | 7.45120233256 |
| NM_020746    | MAVS  | 10970 | 11021 | 8.53132394177 |
| NM_020746    | MAVS  | 6964  | 7005  | 8.53533481089 |
| NM_020746    | MAVS  | 9682  | 9750  | 7.5353415344  |
| NM_020746    | MAVS  | 10683 | 10753 | 8.53534130603 |
| NM_020746    | MAVS  | 2621  | 2680  | 8.53534154195 |
| NM_020746    | MAVS  | 279   | 443   | 9.53534154195 |
| NM_020746    | MAVS  | 9045  | 9115  | 8.53534154195 |
| NM_020746    | MAVS  | 6360  | 6462  | 7.53534154194 |
| NM_020746    | MAVS  | 8385  | 8468  | 9.12030404244 |
| NM_020746    | MAVS  | 5986  | 6096  | 7.53132394177 |
| NM_020746    | MAVS  | 2847  | 2916  | 9.12030380675 |
| NM_020746    | MAVS  | 9321  | 9423  | 10.1203040427 |
| NM_020746    | MAVS  | 6535  | 6615  | 8.53534154195 |
| NM_020746    | MAVS  | 5258  | 5346  | 7.53534154194 |
| NM_020744    | MTA3  | 1767  | 1801  | 1.99333489803 |
| NM_001165895 | CD320 | 248   | 337   | 7.11264137785 |
| NM_001165895 | CD320 | 348   | 476   | 7.69760387857 |
| NM_001165895 | CD320 | 851   | 940   | 7.43456947273 |
| NM_001165895 | CD320 | 56    | 195   | 8.28256637929 |
| NM_001165895 | CD320 | 739   | 842   | 7.69760387857 |
| NM_001165895 | CD320 | 539   | 636   | 7.11264137784 |

|           |       |      |      |               |
|-----------|-------|------|------|---------------|
| NM_020748 | INTS2 | 2267 | 2345 | 6.72614076004 |
| NM_020748 | INTS2 | 1182 | 1334 | 8.7301583602  |
| NM_020748 | INTS2 | 1559 | 1599 | 8.73015162915 |
| NM_020748 | INTS2 | 2024 | 2063 | 6.64601915082 |
| NM_020748 | INTS2 | 759  | 787  | 6.72614076004 |
| NM_020748 | INTS2 | 2374 | 2430 | 7.72998460989 |
| NM_020748 | INTS2 | 1432 | 1468 | 7.72614076004 |
| NM_020748 | INTS2 | 339  | 404  | 6.72998460989 |
| NM_020748 | INTS2 | 3850 | 3951 | 6.73015836021 |
| NM_020748 | INTS2 | 2484 | 2574 | 7.73015162915 |
| NM_001659 | ARF3  | 627  | 687  | 5.51828920592 |
| NM_001659 | ARF3  | 189  | 232  | 4.51427160574 |
| NM_001659 | ARF3  | 1964 | 2014 | 4.51427160574 |
| NM_001659 | ARF3  | 1088 | 1193 | 6.84021730081 |
| NM_001659 | ARF3  | 2665 | 2729 | 4.51828247486 |
| NM_001659 | ARF3  | 2249 | 2309 | 4.51427160574 |
| NM_001659 | ARF3  | 3168 | 3202 | 4.51828247486 |
| NM_001659 | ARF3  | 2312 | 2427 | 7.84021730081 |
| NM_001659 | ARF3  | 3333 | 3450 | 7.10325170664 |
| NM_001659 | ARF3  | 2191 | 2244 | 5.51828247486 |
| NM_001659 | ARF3  | 397  | 462  | 6.10325170642 |
| NM_001659 | ARF3  | 518  | 608  | 6.51828919837 |
| NM_001659 | ARF3  | 1579 | 1634 | 6.09923410647 |
| NM_001659 | ARF3  | 2779 | 3034 | 7.51828920592 |
| NM_001659 | ARF3  | 1484 | 1563 | 6.10325170663 |
| NM_001658 | ARF1  | 1311 | 1364 | 2.19635437997 |
| NM_001658 | ARF1  | 779  | 843  | 3.78132361175 |
| NM_001658 | ARF1  | 1161 | 1200 | 2.19618736071 |
| NM_001658 | ARF1  | 1482 | 1533 | 2.19234351085 |
| NM_001658 | ARF1  | 854  | 1157 | 6.10325170664 |
| NM_001658 | ARF1  | 1211 | 1290 | 4.19636111103 |
| NM_001658 | ARF1  | 53   | 131  | 4.19636111103 |
| NM_001658 | ARF1  | 1599 | 1882 | 7.05434210615 |
| NM_001658 | ARF1  | 206  | 379  | 5.51828920591 |
| NM_001658 | ARF1  | 380  | 602  | 6.19636111103 |
| NM_001658 | ARF1  | 604  | 778  | 6.00371603308 |
| NM_198240 | CLIP1 | 46   | 99   | 5.72193090513 |
| NM_198240 | CLIP1 | 129  | 194  | 4.05282943094 |
| NM_198240 | CLIP1 | 771  | 819  | 4.05282943094 |
| NM_016614 | TDP2  | 237  | 306  | 5.80436066945 |
| NM_016614 | TDP2  | 923  | 970  | 6.38932317017 |
| NM_016614 | TDP2  | 1009 | 1104 | 4.80034307683 |
| NM_016617 | UFM1  | 770  | 837  | 4.69683573373 |
| NM_016617 | UFM1  | 1995 | 2043 | 4.69682901023 |
| NM_016617 | UFM1  | 315  | 373  | 4.6126965319  |
| NM_016617 | UFM1  | 667  | 759  | 5.69682901023 |
| NM_016617 | UFM1  | 2134 | 2192 | 4.69281814111 |
| NM_032846 | RAB2B | 177  | 260  | 7.80086809605 |
| NM_001981 | EPS15 | 518  | 586  | 6.94694316524 |
| NM_001981 | EPS15 | 1887 | 1953 | 6.95095403436 |



|              |            |      |      |               |               |
|--------------|------------|------|------|---------------|---------------|
| NM_032842    | TMEM209    | 2983 | 3024 | 9.37601775813 |               |
| NM_032842    | TMEM209    | 1525 | 1596 | 9.69811960333 |               |
| NM_032842    | TMEM209    | 104  | 145  | 7.37601775813 |               |
| NM_032842    | TMEM209    | 3262 | 3310 | 8.29205229906 |               |
| NM_032842    | TMEM209    | 2195 | 2257 | 7.37601775813 |               |
| NM_032842    | TMEM209    | 2735 | 2797 | 9.96115400916 |               |
| NM_032842    | TMEM209    | 1990 | 2025 | 8.29205229906 |               |
| NM_032842    | TMEM209    | 159  | 342  | 11.2830821041 |               |
| NM_032842    | TMEM209    | 1166 | 1235 | 9.96115400917 |               |
| NM_032842    | TMEM209    | 1729 | 1906 | 11.8997534645 |               |
| NM_032842    | TMEM209    | 621  | 666  | 8.37601775813 |               |
| NM_032842    | TMEM209    | 3041 | 3077 | 7.29205229906 |               |
| NM_032842    | TMEM209    | 2029 | 2118 | 8.96115400917 |               |
| NM_032842    | TMEM209    | 519  | 590  | 8.96098025885 |               |
| NM_032842    | TMEM209    | 1611 | 1682 | 8.37619150822 |               |
| NM_032842    | TMEM209    | 1261 | 1521 | 10.9611540092 |               |
| NM_032842    | TMEM209    | 687  | 871  | 11.5461165099 |               |
| NM_032842    | TMEM209    | 351  | 434  | 10.3761915084 |               |
| NM_032842    | TMEM209    | 902  | 1160 | 11.9611540092 |               |
| NM_015412    | C3orf17    | 2220 | 2254 | 7.91542786031 |               |
| NM_015412    | C3orf17    | 495  | 566  | 8.5005573803  |               |
| NM_001008738 | FNIP1      | 3182 | 3268 | 8.41802560832 |               |
| NM_001008738 | FNIP1      | 2055 | 2083 | 6.74893062927 |               |
| NM_001008738 | FNIP1      | 2571 | 2653 | 6.74893062927 |               |
| NM_001008738 | FNIP1      | 3441 | 3491 | 6.74893062927 |               |
| NM_001008738 | FNIP1      | 5182 | 5246 | 6.8330631076  |               |
| NM_001008738 | FNIP1      | 1570 | 1641 | 8.41803233937 |               |
| NM_001008738 | FNIP1      | 5666 | 5706 | 8.82905223848 |               |
| NM_001008738 | FNIP1      | 260  | 373  | 8.41803233937 |               |
| NM_001198845 | RBM14-RBM4 |      | 1451 | 1529          | 7.53129803262 |
| NM_001198845 | RBM14-RBM4 |      | 484  | 562           | 7.11626054089 |
| NM_001198845 | RBM14-RBM4 |      | 137  | 205           | 5.44715883078 |
| NM_001198845 | RBM14-RBM4 |      | 1158 | 1216          | 7.85322613506 |
| NM_001198845 | RBM14-RBM4 |      | 1217 | 1413          | 9.70122304161 |
| NM_001198845 | RBM14-RBM4 |      | 364  | 447           | 7.53129804017 |
| NM_001198845 | RBM14-RBM4 |      | 582  | 636           | 6.53129780425 |
| NM_001198845 | RBM14-RBM4 |      | 964  | 1156          | 7.11626054089 |
| NM_001198844 | RBM4       | 1792 | 1852 | 4.49601524726 |               |
| NM_001198844 | RBM4       | 2999 | 3036 | 4.50002611638 |               |
| NM_001198844 | RBM4       | 2839 | 2990 | 6.95946446608 |               |
| NM_001198844 | RBM4       | 133  | 193  | 5.08499534816 |               |
| NM_001198844 | RBM4       | 2300 | 2393 | 3.50003284722 |               |
| NM_001198844 | RBM4       | 2752 | 2803 | 3.41589363805 |               |
| NM_001198844 | RBM4       | 214  | 309  | 5.82196094233 |               |
| NM_007172    | NUP50      | 4881 | 4925 | 4.57766967934 |               |
| NM_007172    | NUP50      | 3197 | 3241 | 4.49370422027 |               |
| NM_007172    | NUP50      | 2109 | 2192 | 4.57784342211 |               |
| NM_007172    | NUP50      | 273  | 337  | 5.57784342966 |               |
| NM_007172    | NUP50      | 3864 | 3907 | 5.57784342211 |               |
| NM_007172    | NUP50      | 4314 | 4361 | 4.57382582948 |               |

|           |          |      |      |               |               |
|-----------|----------|------|------|---------------|---------------|
| NM_007172 | NUP50    | 1930 | 1977 | 5.57784342966 |               |
| NM_007172 | NUP50    | 1662 | 1704 | 4.57382582948 |               |
| NM_007172 | NUP50    | 4017 | 4088 | 6.16280593016 |               |
| NM_007172 | NUP50    | 1278 | 1335 | 5.49370422027 |               |
| NM_007172 | NUP50    | 985  | 1110 | 5.57784342966 |               |
| NM_007172 | NUP50    | 179  | 239  | 5.57784342211 |               |
| NM_007172 | NUP50    | 4981 | 5033 | 4.57766967934 |               |
| NM_007172 | NUP50    | 4233 | 4306 | 5.57784342944 |               |
| NM_007172 | NUP50    | 1722 | 1776 | 4.57784319374 |               |
| NM_007172 | NUP50    | 2297 | 2398 | 6.57784342966 |               |
| NM_007172 | NUP50    | 469  | 582  | 5.57784342966 |               |
| NM_007172 | NUP50    | 1803 | 1892 | 5.57784342966 |               |
| NM_007172 | NUP50    | 1983 | 2094 | 6.16280593038 |               |
| NM_007172 | NUP50    | 1428 | 1493 | 6.15878833021 |               |
| NM_000382 | ALDH3A2  | 2385 | 2466 | 5.6903503027  |               |
| NM_000382 | ALDH3A2  | 1878 | 1935 | 5.69052405279 |               |
| NM_000382 | ALDH3A2  | 2074 | 2121 | 4.69051732196 |               |
| NM_000382 | ALDH3A2  | 1728 | 1814 | 5.69052405302 |               |
| NM_000382 | ALDH3A2  | 521  | 565  | 6.27146895356 |               |
| NM_000382 | ALDH3A2  | 1589 | 1723 | 8.49787897507 |               |
| NM_000382 | ALDH3A2  | 404  | 497  | 6.69052405302 |               |
| NM_000382 | ALDH3A2  | 1485 | 1573 | 4.69052405279 |               |
| NM_000382 | ALDH3A2  | 317  | 402  | 4.69052405279 |               |
| NM_000382 | ALDH3A2  | 2147 | 2244 | 4.69052405302 |               |
| NM_000382 | ALDH3A2  | 2273 | 2331 | 6.27548631782 |               |
| NM_000382 | ALDH3A2  | 1086 | 1151 | 5.69052405279 |               |
| NM_000382 | ALDH3A2  | 2912 | 3175 | 8.14995567165 |               |
| NM_000382 | ALDH3A2  | 1219 | 1420 | 7.69052405302 |               |
| NM_000382 | ALDH3A2  | 578  | 977  | 9.59741464862 |               |
| NM_000382 | ALDH3A2  | 2556 | 2645 | 4.69051732196 |               |
| NM_144963 | FAM91A1  | 411  | 457  | 7.92679807249 |               |
| NM_144963 | FAM91A1  | 4100 | 4140 | 6.34183557177 |               |
| NM_144963 | FAM91A1  | 866  | 936  | 7.42597454524 |               |
| NM_144963 | FAM91A1  | 1056 | 1114 | 6.42195718098 |               |
| NM_144963 | FAM91A1  | 1274 | 1357 | 7.42580103084 |               |
| NM_144963 | FAM91A1  | 1983 | 2033 | 7.42195718098 |               |
| NM_144963 | FAM91A1  | 2347 | 2390 | 7.34183557177 |               |
| NM_000386 | BLMH     | 539  | 603  | 5.16278293469 |               |
| NM_000386 | BLMH     | 1337 | 1389 | 4.49368123213 |               |
| NM_000386 | BLMH     | 2106 | 2169 | 4.5778202056  |               |
| NM_000386 | BLMH     | 1927 | 1992 | 4.49368123213 |               |
| NM_000386 | BLMH     | 2308 | 2363 | 5.15876534206 |               |
| NM_000386 | BLMH     | 862  | 946  | 5.8997485364  |               |
| NM_000386 | BLMH     | 642  | 810  | 5.57782044152 |               |
| NM_000386 | BLMH     | 1486 | 1552 | 4.5778202056  |               |
| NM_000386 | BLMH     | 375  | 481  | 5.16278293469 |               |
| NM_000387 | SLC25A20 |      | 766  | 828           | 7.53005195636 |
| NM_000387 | SLC25A20 |      | 157  | 202           | 7.44591947803 |
| NM_000387 | SLC25A20 |      | 937  | 995           | 9.11502118792 |
| NM_000387 | SLC25A20 |      | 257  | 367           | 9.11502095222 |

|              |          |      |      |                    |
|--------------|----------|------|------|--------------------|
| NM_000389    | CDKN1A   | 194  | 243  | 7.14207875665      |
| NM_000389    | CDKN1A   | 1025 | 1071 | 8.72302366475      |
| NM_000389    | CDKN1A   | 247  | 309  | 8.1420787642       |
| NM_000389    | CDKN1A   | 435  | 491  | 8.72704126492      |
| NM_000389    | CDKN1A   | 1387 | 1449 | 8.72704125737      |
| NM_000389    | CDKN1A   | 1928 | 2112 | 10.3120037656      |
| NM_000389    | CDKN1A   | 667  | 712  | 8.14207203315      |
| NM_000389    | CDKN1A   | 740  | 849  | 8.72704126492      |
| NM_000389    | CDKN1A   | 1768 | 1868 | 9.1420787642       |
| NM_007178    | STRAP    | 1809 | 1862 | 4.97662631814      |
| NM_007178    | STRAP    | 467  | 569  | 5.65469822326      |
| NM_007178    | STRAP    | 93   | 245  | 5.8246232247       |
| NM_007178    | STRAP    | 1667 | 1763 | 4.65469822326      |
| NM_007178    | STRAP    | 596  | 762  | 6.3551379414       |
| NM_007178    | STRAP    | 762  | 1096 | 7.86415158889      |
| NM_007178    | STRAP    | 1100 | 1299 | 6.56158881886      |
| NM_014940    | MON1B    | 1353 | 1408 | 8.41317746493      |
| NM_014940    | MON1B    | 1571 | 1617 | 8.49329907414      |
| NM_014940    | MON1B    | 2670 | 2752 | 8.49731643839      |
| NM_014940    | MON1B    | 2192 | 2347 | 10.082279175       |
| NM_016371    | HSD17B7  | 1025 | 1076 | 5.65062546047      |
| NM_016371    | HSD17B7  | 768  | 838  | 6.65079921078      |
| NM_016371    | HSD17B7  | 536  | 620  | 7.97272729813      |
| NM_016371    | HSD17B7  | 840  | 1024 | 8.45815413284      |
| NM_014947    | FOXJ3    | 2279 | 2323 | 6.04901763066      |
| NM_014947    | FOXJ3    | 165  | 276  | 7.63398013138      |
| NM_014947    | FOXJ3    | 2969 | 3088 | 6.04901763066      |
| NM_014947    | FOXJ3    | 745  | 815  | 6.04500003049      |
| NM_001199847 | SMURF1   | 1609 | 1703 | 5.75156256773      |
| NM_001199847 | SMURF1   | 2380 | 2430 | 6.66759710867      |
| NM_001199847 | SMURF1   | 745  | 793  | 5.74771871788      |
| NM_001199847 | SMURF1   | 511  | 586  | 6.75156256773      |
| NM_001199847 | SMURF1   | 4805 | 4904 | 5.74771871788      |
| NM_001199847 | SMURF1   | 2170 | 2220 | 6.74771871788      |
| NM_001199847 | SMURF1   | 1901 | 1969 | 5.74771871788      |
| NM_001199847 | SMURF1   | 3995 | 4074 | 5.74771871788      |
| NM_001199847 | SMURF1   | 356  | 417  | 7.33669881877      |
| NM_001199847 | SMURF1   | 2225 | 2272 | 6.751729587        |
| NM_138774    | C19orf22 |      | 1095 | 1190 10.170275656  |
| NM_138774    | C19orf22 |      | 1388 | 1436 8.16625805586 |
| NM_138774    | C19orf22 |      | 798  | 849 8.17027542011  |
| NM_138774    | C19orf22 |      | 174  | 263 10.4922037509  |
| NM_138774    | C19orf22 |      | 932  | 1025 9.17027565603 |
| NM_003875    | GMPS     | 643  | 724  | 6.36377519474      |
| NM_003875    | GMPS     | 1655 | 1727 | 7.36377519474      |
| NM_003875    | GMPS     | 355  | 392  | 5.36376846368      |
| NM_003875    | GMPS     | 508  | 610  | 7.82320681338      |
| NM_003875    | GMPS     | 933  | 1037 | 5.94873769546      |
| NM_003875    | GMPS     | 1051 | 1148 | 7.36377519474      |
| NM_003875    | GMPS     | 792  | 932  | 7.36377519474      |

|              |        |      |      |               |
|--------------|--------|------|------|---------------|
| NM_003875    | GMPS   | 1464 | 1645 | 7.82320681338 |
| NM_003875    | GMPS   | 1860 | 1989 | 7.53370019618 |
| NM_003875    | GMPS   | 2162 | 2430 | 7.68570328963 |
| NM_003875    | GMPS   | 1349 | 1381 | 5.27963598535 |
| NM_003875    | GMPS   | 399  | 482  | 6.68570328963 |
| NM_003875    | GMPS   | 2024 | 2111 | 4.36377519474 |
| NM_003875    | GMPS   | 168  | 242  | 5.36377495882 |
| NM_003875    | GMPS   | 1383 | 1463 | 5.94873769524 |
| NM_003875    | GMPS   | 1203 | 1337 | 5.94873769546 |
| NM_003870    | IQGAP1 | 5263 | 5328 | 4.70896177731 |
| NM_003870    | IQGAP1 | 1884 | 1943 | 7.29392427803 |
| NM_003870    | IQGAP1 | 631  | 701  | 5.70896176976 |
| NM_003870    | IQGAP1 | 3686 | 3734 | 5.70896177731 |
| NM_003870    | IQGAP1 | 3292 | 3393 | 7.29392427803 |
| NM_003870    | IQGAP1 | 4938 | 4976 | 5.70896177731 |
| NM_003870    | IQGAP1 | 5054 | 5113 | 7.0308898722  |
| NM_003870    | IQGAP1 | 4984 | 5048 | 6.70896177709 |
| NM_003870    | IQGAP1 | 2348 | 2418 | 7.29392427803 |
| NM_003870    | IQGAP1 | 5185 | 5263 | 6.70896177731 |
| NM_003870    | IQGAP1 | 6932 | 6998 | 5.70895504626 |
| NM_003870    | IQGAP1 | 1696 | 1778 | 6.29392427803 |
| NM_003870    | IQGAP1 | 5716 | 5776 | 5.70494417714 |
| NM_003870    | IQGAP1 | 2987 | 3074 | 6.28990667786 |
| NM_003870    | IQGAP1 | 1095 | 1163 | 4.70895504626 |
| NM_003870    | IQGAP1 | 2190 | 2232 | 5.708788027   |
| NM_003870    | IQGAP1 | 5376 | 5462 | 4.70896177731 |
| NM_003870    | IQGAP1 | 6378 | 6424 | 6.29392427781 |
| NM_003870    | IQGAP1 | 3749 | 3791 | 4.62482256793 |
| NM_003870    | IQGAP1 | 707  | 878  | 6.29392427803 |
| NM_003870    | IQGAP1 | 7025 | 7091 | 4.70896177731 |
| NM_003870    | IQGAP1 | 4623 | 4656 | 4.62482256793 |
| NM_003870    | IQGAP1 | 3861 | 3973 | 7.87888677876 |
| NM_003870    | IQGAP1 | 1491 | 1640 | 7.51631669937 |
| NM_003870    | IQGAP1 | 1252 | 1361 | 7.0308898722  |
| NM_003870    | IQGAP1 | 886  | 1003 | 6.29392427803 |
| NM_003870    | IQGAP1 | 2735 | 2895 | 8.0308898722  |
| NM_003870    | IQGAP1 | 4059 | 4139 | 5.70896177731 |
| NM_003870    | IQGAP1 | 2566 | 2705 | 7.51631669937 |
| NM_003870    | IQGAP1 | 2485 | 2516 | 4.62482256793 |
| NM_003870    | IQGAP1 | 3482 | 3672 | 8.51631669937 |
| NM_003870    | IQGAP1 | 4163 | 4371 | 7.70896177731 |
| NM_003870    | IQGAP1 | 4494 | 4619 | 6.29392427803 |
| NM_003870    | IQGAP1 | 3089 | 3268 | 7.70896177731 |
| NM_003870    | IQGAP1 | 121  | 313  | 7.70896177731 |
| NM_003870    | IQGAP1 | 315  | 557  | 8.61585237292 |
| NM_003870    | IQGAP1 | 1988 | 2117 | 6.70896177731 |
| NM_003870    | IQGAP1 | 1382 | 1481 | 5.70896177731 |
| NM_003870    | IQGAP1 | 6520 | 6594 | 5.70494417714 |
| NM_001128164 | ATXN1  | 8367 | 8420 | 6.62940511515 |
| NM_003878    | GGH    | 545  | 616  | 7.25730784064 |

|              |          |       |       |               |               |
|--------------|----------|-------|-------|---------------|---------------|
| NM_003878    | GGH      | 1104  | 1160  | 5.93537974575 |               |
| NM_003878    | GGH      | 1021  | 1098  | 7.52034224625 |               |
| NM_003878    | GGH      | 445   | 545   | 8.25730784064 |               |
| NM_003878    | GGH      | 1332  | 1434  | 8.10530474719 |               |
| NM_003878    | GGH      | 1233  | 1332  | 6.93537974575 |               |
| NM_003878    | GGH      | 626   | 916   | 9.63581946389 |               |
| NM_001242361 | NRD1     | 2032  | 2124  | 6.72819128096 |               |
| NM_001242361 | NRD1     | 1219  | 1281  | 5.50579212857 |               |
| NM_001242361 | NRD1     | 3164  | 3210  | 4.91681875873 |               |
| NM_001242361 | NRD1     | 3298  | 3348  | 3.92066260858 |               |
| NM_001242361 | NRD1     | 2221  | 2270  | 6.24276445356 |               |
| NM_001242361 | NRD1     | 1774  | 1877  | 6.50579885962 |               |
| NM_001242361 | NRD1     | 2799  | 2907  | 6.72819128096 |               |
| NM_001242361 | NRD1     | 2124  | 2196  | 5.50579885207 |               |
| NM_001242361 | NRD1     | 153   | 300   | 4.9208363589  |               |
| NM_001242361 | NRD1     | 858   | 933   | 5.5057986237  |               |
| NM_001242361 | NRD1     | 1001  | 1127  | 4.9208363589  |               |
| NM_001242361 | NRD1     | 1419  | 1630  | 7.09076136034 |               |
| NM_001242361 | NRD1     | 2621  | 2701  | 3.92083635868 |               |
| NM_001242361 | NRD1     | 2987  | 3140  | 6.72819128096 |               |
| NM_001242361 | NRD1     | 705   | 826   | 5.50579885961 |               |
| NM_001242361 | NRD1     | 2275  | 2586  | 7.9208363589  |               |
| NM_024067    | C7orf26  | 358   | 446   | 9.59138616556 |               |
| NM_024067    | C7orf26  | 111   | 153   | 7.92228445546 |               |
| NM_024067    | C7orf26  | 1581  | 1627  | 9.59138615801 |               |
| NM_024067    | C7orf26  | 521   | 586   | 9.00641693379 |               |
| NM_024067    | C7orf26  | 591   | 694   | 9.00642366484 |               |
| NM_001164762 | PRKAR1B  | 195   | 250   | 7.80230239257 |               |
| NM_001164762 | PRKAR1B  | 2401  | 2468  | 5.80230239257 |               |
| NM_001164762 | PRKAR1B  | 445   | 558   | 8.80230239257 |               |
| NM_001164762 | PRKAR1B  | 1381  | 1480  | 8.12423048746 |               |
| NM_001164762 | PRKAR1B  | 957   | 983   | 5.71816318318 |               |
| NM_001164762 | PRKAR1B  | 627   | 699   | 7.38726489329 |               |
| NM_001164762 | PRKAR1B  | 1036  | 1120  | 5.80230239257 |               |
| NM_001164762 | PRKAR1B  | 136   | 175   | 6.80229566152 |               |
| NM_001164762 | PRKAR1B  | 1246  | 1348  | 5.80229566152 |               |
| NM_001164762 | PRKAR1B  | 1152  | 1230  | 7.38725816224 |               |
| NM_024065    | PDCL3    | 681   | 737   | 4.7480930142  |               |
| NM_024063    | SPATA5L1 |       | 1451  | 1552          | 8.60914138523 |
| NM_024063    | SPATA5L1 |       | 2209  | 2251          | 6.94003967513 |
| NM_024063    | SPATA5L1 |       | 1379  | 1420          | 7.02016128434 |
| NM_024063    | SPATA5L1 |       | 53    | 142           | 8.60914138523 |
| NM_024063    | SPATA5L1 |       | 1993  | 2036          | 7.0240051342  |
| NM_024063    | SPATA5L1 |       | 1803  | 1866          | 6.94003967513 |
| NM_000051    | ATM      | 3276  | 3333  | 7.42304801307 |               |
| NM_000051    | ATM      | 9386  | 9463  | 7.42288099381 |               |
| NM_000051    | ATM      | 1070  | 1144  | 6.83407464323 |               |
| NM_000051    | ATM      | 10215 | 10286 | 5.83809200749 |               |
| NM_000051    | ATM      | 360   | 453   | 7.42304801307 |               |
| NM_173569    | UBN2     | 1847  | 1899  | 8.26145990376 |               |

|           |        |      |      |               |
|-----------|--------|------|------|---------------|
| NM_173569 | UBN2   | 9016 | 9092 | 8.25761605391 |
| NM_173569 | UBN2   | 7607 | 7691 | 8.26163365408 |
| NM_000053 | ATP7B  | 3213 | 3253 | 6.17223207813 |
| NM_000053 | ATP7B  | 4759 | 4831 | 7.16822120901 |
| NM_000053 | ATP7B  | 2211 | 2248 | 6.0880995998  |
| NM_000053 | ATP7B  | 3590 | 3633 | 6.0880995998  |
| NM_000053 | ATP7B  | 4040 | 4084 | 8.16822120901 |
| NM_000053 | ATP7B  | 3681 | 3750 | 7.17206505887 |
| NM_000053 | ATP7B  | 3405 | 3486 | 6.17223207813 |
| NM_145698 | ACBD5  | 179  | 253  | 8.27731284312 |
| NM_145698 | ACBD5  | 583  | 624  | 7.5403405179  |
| NM_145698 | ACBD5  | 2879 | 2946 | 5.95538474801 |
| NM_145698 | ACBD5  | 1915 | 1980 | 7.54034724141 |
| NM_145698 | ACBD5  | 1082 | 1142 | 7.95538474823 |
| NM_145698 | ACBD5  | 1718 | 1856 | 8.54034724896 |
| NM_145698 | ACBD5  | 256  | 352  | 6.95538474824 |
| NM_145698 | ACBD5  | 1191 | 1262 | 5.87124553885 |
| NM_173561 | UNC5CL | 2553 | 2721 | 13.9266208945 |
| NM_003035 | STIL   | 229  | 283  | 8.47677552903 |
| NM_003035 | STIL   | 4325 | 4379 | 9.47694927935 |
| NM_173562 | KCTD20 | 2506 | 2554 | 6.383788149   |
| NM_173562 | KCTD20 | 336  | 385  | 6.46792712246 |
| NM_173562 | KCTD20 | 1507 | 1548 | 6.383788149   |
| NM_173562 | KCTD20 | 3275 | 3360 | 7.46792712246 |
| NM_173562 | KCTD20 | 4220 | 4269 | 5.383788149   |
| NM_173562 | KCTD20 | 992  | 1060 | 7.05288312805 |
| NM_173562 | KCTD20 | 531  | 585  | 5.46390975821 |
| NM_173562 | KCTD20 | 3640 | 3684 | 6.383788149   |
| NM_173562 | KCTD20 | 1166 | 1210 | 6.46390975821 |
| NM_173562 | KCTD20 | 2648 | 2718 | 6.46775360806 |
| NM_173562 | KCTD20 | 3157 | 3202 | 5.46390975821 |
| NM_145693 | LPIN1  | 1158 | 1205 | 7.26112030006 |
| NM_145690 | YWHAZ  | 859  | 943  | 3.73185634691 |
| NM_145690 | YWHAZ  | 585  | 659  | 3.27242472827 |
| NM_145690 | YWHAZ  | 943  | 1027 | 2.85738722899 |
| NM_145690 | YWHAZ  | 1304 | 1402 | 3.59435282316 |
| NM_145690 | YWHAZ  | 2194 | 2244 | 1.27242449235 |
| NM_145690 | YWHAZ  | 1060 | 1165 | 2.59435282316 |
| NM_145690 | YWHAZ  | 1165 | 1240 | 1.85738722899 |
| NM_145690 | YWHAZ  | 1802 | 2028 | 3.85738722899 |
| NM_145690 | YWHAZ  | 1420 | 1487 | 2.59435282316 |
| NM_145690 | YWHAZ  | 2485 | 2708 | 4.07977965033 |
| NM_145690 | YWHAZ  | 2287 | 2474 | 3.44234972971 |
| NM_145690 | YWHAZ  | 2032 | 2161 | 3.44234972971 |
| NM_145690 | YWHAZ  | 680  | 839  | 4.59435282316 |
| NM_145690 | YWHAZ  | 144  | 546  | 5.55782694713 |
| NM_145690 | YWHAZ  | 1493 | 1641 | 2.59435282316 |
| NM_145690 | YWHAZ  | 2797 | 2959 | 2.85738722899 |
| NM_173566 | PRR14L | 3394 | 3451 | 9.61384555458 |
| NM_173566 | PRR14L | 3340 | 3388 | 8.94474384447 |

|           |        |       |       |               |
|-----------|--------|-------|-------|---------------|
| NM_173566 | PRR14L | 5065  | 5135  | 9.61383882352 |
| NM_173566 | PRR14L | 3460  | 3513  | 9.61383882352 |
| NM_173566 | PRR14L | 7353  | 7405  | 10.3467935486 |
| NM_173566 | PRR14L | 10723 | 10799 | 9.61384555457 |
| NM_173566 | PRR14L | 3734  | 3770  | 8.02486545368 |
| NM_173566 | PRR14L | 8758  | 8828  | 9.02486545368 |
| NM_173566 | PRR14L | 7202  | 7255  | 7.94474384447 |
| NM_173566 | PRR14L | 794   | 913   | 9.02888304631 |
| NM_025191 | EDEM3  | 3197  | 3234  | 7.71809934691 |
| NM_025191 | EDEM3  | 5896  | 5955  | 7.13313684619 |
| NM_025191 | EDEM3  | 1272  | 1327  | 7.72211693954 |
| NM_025191 | EDEM3  | 2676  | 2769  | 8.13715444636 |
| NM_025191 | EDEM3  | 3817  | 3907  | 8.13715443881 |
| NM_025191 | EDEM3  | 1912  | 1962  | 6.13715421044 |
| NM_025191 | EDEM3  | 2287  | 2336  | 7.71809934691 |
| NM_025191 | EDEM3  | 3004  | 3058  | 7.13698069605 |
| NM_025191 | EDEM3  | 6492  | 6552  | 6.05301523698 |
| NM_025191 | EDEM3  | 2569  | 2676  | 7.13715444636 |
| NM_025191 | EDEM3  | 881   | 974   | 8.13715444636 |
| NM_025191 | EDEM3  | 4814  | 4881  | 7.13698069605 |
| NM_025191 | EDEM3  | 399   | 455   | 7.13714771531 |
| NM_025191 | EDEM3  | 1568  | 1710  | 9.72211694708 |
| NM_025191 | EDEM3  | 1059  | 1110  | 7.13714771531 |
| NM_025191 | EDEM3  | 2100  | 2175  | 7.72211694708 |
| NM_025191 | EDEM3  | 763   | 813   | 6.13313684619 |
| NM_025191 | EDEM3  | 1741  | 1887  | 9.94450936842 |
| NM_025191 | EDEM3  | 1423  | 1454  | 6.05301523698 |
| NM_025191 | EDEM3  | 460   | 641   | 9.94450936842 |
| NM_025191 | EDEM3  | 4162  | 4259  | 7.72211694708 |
| NM_025191 | EDEM3  | 1112  | 1211  | 8.13715444636 |
| NM_025191 | EDEM3  | 2178  | 2284  | 7.72211694708 |
| NM_025193 | HSD3B7 | 409   | 481   | 9.71314543786 |
| NM_025193 | HSD3B7 | 250   | 329   | 8.12818293692 |
| NM_025193 | HSD3B7 | 348   | 390   | 9.12818293692 |
| NM_025193 | HSD3B7 | 701   | 746   | 8.04404372775 |
| NM_025193 | HSD3B7 | 1325  | 1402  | 9.12818293714 |
| NM_025193 | HSD3B7 | 492   | 521   | 8.04404372775 |
| NM_025193 | HSD3B7 | 1532  | 1638  | 10.9355378592 |
| NM_025193 | HSD3B7 | 1674  | 1743  | 8.12818293714 |
| NM_025193 | HSD3B7 | 1955  | 2084  | 10.7131454379 |
| NM_025193 | HSD3B7 | 845   | 971   | 10.450111032  |
| NM_025193 | HSD3B7 | 1422  | 1500  | 9.71314543031 |
| NM_025193 | HSD3B7 | 973   | 1084  | 9.12818293714 |
| NM_025194 | ITPKC  | 1279  | 1332  | 5.96811383416 |
| NM_025194 | ITPKC  | 3066  | 3125  | 5.96828085343 |
| NM_025195 | TRIB1  | 1718  | 1778  | 6.63832650018 |
| NM_025195 | TRIB1  | 3275  | 3372  | 6.64234410035 |
| NM_025195 | TRIB1  | 2381  | 2485  | 7.64234410035 |
| NM_025196 | GRPEL1 | 213   | 319   | 2.95902045362 |
| NM_025196 | GRPEL1 | 430   | 543   | 2.37405122186 |

|              |          |      |      |                   |
|--------------|----------|------|------|-------------------|
| NM_025196    | GRPEL1   | 959  | 1000 | 2.95901372258     |
| NM_025196    | GRPEL1   | 134  | 206  | 2.28991874353     |
| NM_025196    | GRPEL1   | 346  | 409  | 1.37388420259     |
| NM_025196    | GRPEL1   | 1365 | 1433 | 1.37405794536     |
| NM_025196    | GRPEL1   | 741  | 805  | 2.87488124425     |
| NM_001003678 | C11orf49 |      | 347  | 406 11.1112339176 |
| NM_001080123 | PRNP     | 648  | 711  | 4.97886781423     |
| NM_001080123 | PRNP     | 1079 | 1120 | 4.97886757831     |
| NM_001080123 | PRNP     | 1245 | 1301 | 5.97886780668     |
| NM_001080123 | PRNP     | 915  | 1000 | 6.56383031495     |
| NM_001080123 | PRNP     | 2495 | 2541 | 6.29677830894     |
| NM_001080123 | PRNP     | 1301 | 1355 | 5.55981271478     |
| NM_001080123 | PRNP     | 233  | 329  | 5.97886781423     |
| NM_001080123 | PRNP     | 1685 | 1719 | 3.97485021406     |
| NM_001080123 | PRNP     | 721  | 781  | 5.56383031495     |
| NM_001080123 | PRNP     | 1123 | 1216 | 5.97886781423     |
| NM_001080123 | PRNP     | 802  | 901  | 4.97886781423     |
| NM_003384    | VRK1     | 234  | 283  | 6.66227869507     |
| NM_003384    | VRK1     | 1254 | 1339 | 5.66227869507     |
| NM_003384    | VRK1     | 649  | 746  | 7.98822439013     |
| NM_003384    | VRK1     | 960  | 1057 | 5.66629628769     |
| NM_003380    | VIM      | 340  | 384  | 9.00824241204     |
| NM_003380    | VIM      | 402  | 445  | 9.67734412214     |
| NM_003380    | VIM      | 488  | 540  | 10.0923816214     |
| NM_003380    | VIM      | 2017 | 2063 | 9.67332652197     |
| NM_003380    | VIM      | 1894 | 1982 | 10.0923816214     |
| NM_003380    | VIM      | 1391 | 1836 | 13.820302076      |
| NM_003380    | VIM      | 553  | 1385 | 13.7648069634     |
| NM_153371    | LNx2     | 261  | 327  | 6.61541869164     |
| NM_153371    | LNx2     | 3008 | 3086 | 6.69955790103     |
| NM_153377    | LRIG3    | 267  | 300  | 9.78065326489     |
| NM_153377    | LRIG3    | 2872 | 2900 | 9.11556915496     |
| NM_153377    | LRIG3    | 3297 | 3367 | 10.1997016333     |
| NM_153377    | LRIG3    | 2985 | 3037 | 8.19970163329     |
| NM_153377    | LRIG3    | 2553 | 2609 | 9.78467086484     |
| NM_153377    | LRIG3    | 1901 | 1937 | 9.19569076417     |
| NM_153377    | LRIG3    | 934  | 1090 | 11.3696333658     |
| NM_153377    | LRIG3    | 1350 | 1531 | 11.3696333658     |
| NM_153377    | LRIG3    | 3406 | 3445 | 8.19569076417     |
| NM_153377    | LRIG3    | 3554 | 3642 | 9.1997083568      |
| NM_153377    | LRIG3    | 2264 | 2430 | 11.1997083643     |
| NM_153377    | LRIG3    | 2703 | 2862 | 11.0070632864     |
| NM_153377    | LRIG3    | 3037 | 3126 | 9.78467086507     |
| NM_001195738 | C1orf93  | 838  | 899  | 8.25485767318     |
| NM_001195738 | C1orf93  | 1198 | 1251 | 7.5857559633      |
| NM_001195738 | C1orf93  | 1594 | 1638 | 6.5857559633      |
| NM_001195738 | C1orf93  | 429  | 500  | 8.25084007323     |
| NM_001195738 | C1orf93  | 945  | 1049 | 8.66989517268     |
| NM_001195738 | C1orf93  | 1860 | 1934 | 6.66989517268     |
| NM_001100409 | SENP6    | 1990 | 2077 | 5.33785881178     |



|              |         |      |      |               |
|--------------|---------|------|------|---------------|
| NM_001100409 | SENP6   | 814  | 893  | 4.33785880423 |
| NM_003234    | TFRC    | 5167 | 5224 | 3.49735179731 |
| NM_003234    | TFRC    | 3765 | 3885 | 4.91238929659 |
| NM_003234    | TFRC    | 3190 | 3305 | 5.61282901474 |
| NM_003234    | TFRC    | 3588 | 3746 | 5.08231429804 |
| NM_003234    | TFRC    | 4630 | 4801 | 5.8192798922  |
| NM_003234    | TFRC    | 4991 | 5141 | 6.49735179732 |
| NM_003234    | TFRC    | 3004 | 3185 | 6.16031681004 |
| NM_003234    | TFRC    | 4066 | 4208 | 4.49735179732 |
| NM_003234    | TFRC    | 2771 | 2968 | 6.95678341595 |
| NM_003234    | TFRC    | 4327 | 4592 | 5.71974421865 |
| NM_003234    | TFRC    | 3305 | 3456 | 5.8192798922  |
| NM_003234    | TFRC    | 264  | 2762 | 11.051940649  |
| NM_003234    | TFRC    | 4812 | 4983 | 5.49735179732 |
| NM_001101800 | FAM13B  | 2898 | 2961 | 6.71108076634 |
| NM_001100400 | PDS5A   | 2116 | 2191 | 7.76116731498 |
| NM_001100400 | PDS5A   | 472  | 534  | 6.76116731498 |
| NM_001100400 | PDS5A   | 2217 | 2288 | 5.76116731498 |
| NM_001100400 | PDS5A   | 742  | 839  | 7.76116731498 |
| NM_001100400 | PDS5A   | 627  | 729  | 7.76116731498 |
| NM_001100400 | PDS5A   | 1718 | 1813 | 6.3461298157  |
| NM_001100400 | PDS5A   | 1273 | 1497 | 8.56852223704 |
| NM_001100400 | PDS5A   | 1912 | 2112 | 8.22059893362 |
| NM_001100400 | PDS5A   | 1026 | 1100 | 6.76116731498 |
| NM_001100400 | PDS5A   | 1148 | 1221 | 6.34612957979 |
| NM_001100400 | PDS5A   | 1826 | 1898 | 5.75714971481 |
| NM_001100400 | PDS5A   | 1503 | 1576 | 6.3461298157  |
| NM_001195731 | CHPF    | 1858 | 1943 | 5.56749094145 |
| NM_001195731 | CHPF    | 2397 | 2471 | 6.5674976725  |
| NM_001195731 | CHPF    | 1718 | 1766 | 6.5674976725  |
| NM_001195731 | CHPF    | 2321 | 2371 | 7.14844257305 |
| NM_001195731 | CHPF    | 1955 | 2014 | 7.15246017322 |
| NM_001195731 | CHPF    | 419  | 480  | 7.5674976725  |
| NM_001195731 | CHPF    | 1219 | 1289 | 6.5674976725  |
| NM_001195731 | CHPF    | 1126 | 1171 | 5.56732392218 |
| NM_001195731 | CHPF    | 879  | 943  | 6.56749094145 |
| NM_001195731 | CHPF    | 1350 | 1545 | 7.88942576739 |
| NM_001195733 | PIP5K1C | 2572 | 2627 | 9.00497714883 |
| NM_001195733 | PIP5K1C | 4191 | 4232 | 9.00899451308 |
| NM_001195733 | PIP5K1C | 468  | 541  | 10.5939572422 |
| NM_001195733 | PIP5K1C | 2756 | 2818 | 8.92485553962 |
| NM_014503    | UTP20   | 1934 | 1983 | 7.8492295433  |
| NM_014503    | UTP20   | 7147 | 7188 | 6.85324041242 |
| NM_014503    | UTP20   | 3937 | 4006 | 7.85324714347 |
| NM_014503    | UTP20   | 2342 | 2384 | 6.76910793409 |
| NM_014503    | UTP20   | 4488 | 4531 | 7.85324690756 |
| NM_014503    | UTP20   | 6402 | 6447 | 8.43820291314 |
| NM_014503    | UTP20   | 6135 | 6221 | 9.43820291314 |
| NM_014502    | PRPF19  | 766  | 838  | 6.77722634747 |
| NM_014502    | PRPF19  | 65   | 99   | 5.3711590432  |

|           |         |      |      |               |
|-----------|---------|------|------|---------------|
| NM_014502 | PRPF19  | 656  | 722  | 6.77722633992 |
| NM_014502 | PRPF19  | 1903 | 1942 | 4.3711590432  |
| NM_014502 | PRPF19  | 909  | 999  | 7.26265317464 |
| NM_014502 | PRPF19  | 1366 | 1674 | 9.45529825258 |
| NM_014502 | PRPF19  | 483  | 553  | 4.45529825258 |
| NM_014502 | PRPF19  | 1022 | 1138 | 7.45529825258 |
| NM_014502 | PRPF19  | 246  | 312  | 6.04025402225 |
| NM_014502 | PRPF19  | 1143 | 1364 | 8.97886020864 |
| NM_014502 | PRPF19  | 555  | 653  | 7.0402607533  |
| NM_014501 | UBE2S   | 398  | 458  | 6.43991230134 |
| NM_014501 | UBE2S   | 1137 | 1184 | 5.43991230133 |
| NM_014501 | UBE2S   | 526  | 757  | 9.52737514259 |
| NM_014501 | UBE2S   | 918  | 1136 | 9.34680289695 |
| NM_014500 | HTATSF1 | 695  | 778  | 6.13951840702 |
| NM_014500 | HTATSF1 | 1447 | 1509 | 4.73362485307 |
| NM_014500 | HTATSF1 | 142  | 293  | 6.62511898451 |
| NM_005439 | MLF2    | 567  | 636  | 5.13583930073 |
| NM_005439 | MLF2    | 1298 | 1390 | 5.13583930828 |
| NM_005439 | MLF2    | 1248 | 1297 | 6.13583930827 |
| NM_005439 | MLF2    | 829  | 894  | 4.13583930828 |
| NM_005439 | MLF2    | 432  | 562  | 7.13583930828 |
| NM_005439 | MLF2    | 985  | 1149 | 8.52815673106 |
| NM_005439 | MLF2    | 33   | 412  | 8.65940126434 |
| NM_014506 | TOR1B   | 715  | 750  | 7.15790955884 |
| NM_014506 | TOR1B   | 2135 | 2185 | 6.57294033461 |
| NM_014506 | TOR1B   | 1736 | 1839 | 5.57294705812 |
| NM_014506 | TOR1B   | 639  | 677  | 5.5689294655  |
| NM_014506 | TOR1B   | 534  | 634  | 8.57294706567 |
| NM_014506 | TOR1B   | 264  | 372  | 7.15790956639 |
| NM_014506 | TOR1B   | 402  | 504  | 8.57294706567 |
| NM_014506 | TOR1B   | 1171 | 1211 | 5.48880785628 |
| NM_014506 | TOR1B   | 912  | 997  | 5.57294705812 |
| NM_014506 | TOR1B   | 760  | 881  | 8.57294706567 |
| NM_014504 | RABGEF1 | 2565 | 2609 | 6.86113811801 |
| NM_014504 | RABGEF1 | 1169 | 1228 | 6.94527059634 |
| NM_014504 | RABGEF1 | 3723 | 3772 | 5.3562972265  |
| NM_014504 | RABGEF1 | 540  | 594  | 5.36014107635 |
| NM_014504 | RABGEF1 | 3588 | 3640 | 5.27617561728 |
| NM_014504 | RABGEF1 | 2355 | 2386 | 6.27617561728 |
| NM_014504 | RABGEF1 | 1537 | 1597 | 6.3562972265  |
| NM_014504 | RABGEF1 | 2915 | 2982 | 6.27617561728 |
| NM_014504 | RABGEF1 | 661  | 751  | 6.94527732739 |
| NM_014504 | RABGEF1 | 1889 | 1938 | 5.36031459075 |
| NM_014504 | RABGEF1 | 756  | 858  | 7.36031482667 |
| NM_014504 | RABGEF1 | 156  | 251  | 6.36031482667 |
| NM_014504 | RABGEF1 | 1334 | 1528 | 6.94527732739 |
| NM_005435 | ARHGEF5 | 3337 | 3400 | 10.863866134  |
| NM_005435 | ARHGEF5 | 4721 | 4778 | 10.863866134  |
| NM_005435 | ARHGEF5 | 3693 | 3756 | 12.4528395039 |
| NM_005435 | ARHGEF5 | 4357 | 4424 | 12.4528462274 |

|           |         |      |      |               |
|-----------|---------|------|------|---------------|
| NM_005435 | ARHGEF5 | 3761 | 3800 | 11.863866134  |
| NM_005435 | ARHGEF5 | 4823 | 4910 | 11.8678837267 |
| NM_005435 | ARHGEF5 | 2746 | 2800 | 12.4528462349 |
| NM_005435 | ARHGEF5 | 1012 | 1087 | 10.7837445248 |
| NM_005435 | ARHGEF5 | 1798 | 1859 | 11.8677099839 |
| NM_005435 | ARHGEF5 | 1307 | 1368 | 10.8677099839 |
| NM_005435 | ARHGEF5 | 2905 | 2999 | 10.8678837342 |
| NM_005435 | ARHGEF5 | 1396 | 1474 | 11.8678837342 |
| NM_005435 | ARHGEF5 | 846  | 910  | 11.8678834983 |
| NM_005435 | ARHGEF5 | 4167 | 4254 | 10.863866134  |
| NM_005435 | ARHGEF5 | 4026 | 4107 | 11.8678837342 |
| NM_005435 | ARHGEF5 | 238  | 387  | 14.0378087356 |
| NM_005435 | ARHGEF5 | 538  | 620  | 11.8678837342 |
| NM_005435 | ARHGEF5 | 3815 | 3937 | 12.8678837342 |
| NM_005437 | NCOA4   | 3434 | 3481 | 3.38204594809 |
| NM_005437 | NCOA4   | 324  | 380  | 4.96718219913 |
| NM_005437 | NCOA4   | 1668 | 1716 | 2.3822196984  |
| NM_005437 | NCOA4   | 3200 | 3247 | 2.38204594809 |
| NM_005437 | NCOA4   | 2821 | 2887 | 4.7041477933  |
| NM_005437 | NCOA4   | 2143 | 2194 | 2.3822196984  |
| NM_005437 | NCOA4   | 2970 | 3016 | 2.37820209824 |
| NM_005437 | NCOA4   | 3324 | 3378 | 4.38221969841 |
| NM_005437 | NCOA4   | 1728 | 1792 | 3.38221969841 |
| NM_005437 | NCOA4   | 2355 | 2441 | 4.7041477933  |
| NM_005437 | NCOA4   | 194  | 299  | 3.96718219913 |
| NM_005437 | NCOA4   | 3032 | 3182 | 5.7041477933  |
| NM_005437 | NCOA4   | 1882 | 2129 | 7.18957462047 |
| NM_005437 | NCOA4   | 2579 | 2706 | 4.38221969841 |
| NM_005437 | NCOA4   | 1451 | 1667 | 5.96718219913 |
| NM_005437 | NCOA4   | 2228 | 2327 | 2.38221296736 |
| NM_005437 | NCOA4   | 530  | 754  | 6.38221969841 |
| NM_005437 | NCOA4   | 1300 | 1450 | 4.7041477933  |
| NM_005437 | NCOA4   | 972  | 1086 | 5.18957462047 |
| NM_005437 | NCOA4   | 436  | 526  | 3.96718219913 |
| NM_005437 | NCOA4   | 1095 | 1266 | 6.38221969841 |
| NM_005437 | NCOA4   | 792  | 953  | 5.7041477933  |
| NM_005436 | CCDC6   | 1001 | 1066 | 6.77742001712 |
| NM_005436 | CCDC6   | 3619 | 3670 | 6.1924575164  |
| NM_005436 | CCDC6   | 3416 | 3487 | 6.19262453566 |
| NM_005436 | CCDC6   | 2023 | 2077 | 5.1926310308  |
| NM_005436 | CCDC6   | 3689 | 3742 | 5.10849205733 |
| NM_005436 | CCDC6   | 1864 | 1930 | 6.1926310308  |
| NM_005436 | CCDC6   | 801  | 885  | 5.19263126649 |
| NM_005436 | CCDC6   | 2463 | 2547 | 6.19262453566 |
| NM_005436 | CCDC6   | 1225 | 1311 | 5.19263126672 |
| NM_005436 | CCDC6   | 1628 | 1710 | 5.19262453566 |
| NM_005436 | CCDC6   | 5334 | 5422 | 6.77759376744 |
| NM_005431 | XRCC2   | 1711 | 1739 | 9.35482933248 |
| NM_005433 | YES1    | 2715 | 2752 | 3.53952740337 |
| NM_005433 | YES1    | 1579 | 1679 | 5.20862887756 |

|           |        |      |      |               |
|-----------|--------|------|------|---------------|
| NM_005433 | YES1   | 4027 | 4111 | 4.62366661276 |
| NM_005433 | YES1   | 1057 | 1125 | 4.62366660521 |
| NM_005433 | YES1   | 1375 | 1458 | 5.62366661276 |
| NM_005433 | YES1   | 3681 | 3744 | 3.53952740337 |
| NM_005433 | YES1   | 1709 | 1777 | 4.53952740337 |
| NM_005433 | YES1   | 4443 | 4511 | 3.61964901259 |
| NM_005433 | YES1   | 2035 | 2155 | 4.62366661276 |
| NM_005433 | YES1   | 3934 | 4002 | 5.20862887756 |
| NM_005432 | XRCC3  | 1666 | 1719 | 10.0314894998 |
| NM_021994 | ZNF277 | 1226 | 1275 | 5.16941484168 |
| NM_021994 | ZNF277 | 958  | 1039 | 6.25355404351 |
| NM_003128 | SPTBN1 | 3658 | 3768 | 4.81472372363 |
| NM_003128 | SPTBN1 | 3340 | 3412 | 2.22976122291 |
| NM_003128 | SPTBN1 | 7075 | 7205 | 5.13665181852 |
| NM_003128 | SPTBN1 | 834  | 1042 | 5.81472372363 |
| NM_003128 | SPTBN1 | 6924 | 7073 | 5.03711614496 |
| NM_003128 | SPTBN1 | 3430 | 3650 | 5.13665181852 |
| NM_003128 | SPTBN1 | 2491 | 2634 | 5.39968622435 |
| NM_003128 | SPTBN1 | 2688 | 2879 | 5.13665181852 |
| NM_003128 | SPTBN1 | 319  | 370  | 2.81472372363 |
| NM_003128 | SPTBN1 | 3232 | 3330 | 3.81472372363 |
| NM_003128 | SPTBN1 | 4602 | 4690 | 4.39968622435 |
| NM_003128 | SPTBN1 | 4702 | 5004 | 6.03711614496 |
| NM_003128 | SPTBN1 | 5355 | 5849 | 7.13665181852 |
| NM_003128 | SPTBN1 | 2154 | 2444 | 5.39968622435 |
| NM_003128 | SPTBN1 | 5860 | 6133 | 6.31722406416 |
| NM_003128 | SPTBN1 | 2882 | 3229 | 5.93020094105 |
| NM_003128 | SPTBN1 | 3797 | 4349 | 7.47768873635 |
| NM_003128 | SPTBN1 | 7214 | 7325 | 2.81472372363 |
| NM_003128 | SPTBN1 | 402  | 821  | 6.51516344177 |
| NM_003128 | SPTBN1 | 7335 | 7489 | 4.55168931779 |
| NM_003128 | SPTBN1 | 6567 | 6855 | 5.22976122291 |
| NM_003128 | SPTBN1 | 234  | 298  | 2.22976122291 |
| NM_003128 | SPTBN1 | 1668 | 2152 | 6.81472372363 |
| NM_003128 | SPTBN1 | 7518 | 8072 | 7.16049856047 |
| NM_003128 | SPTBN1 | 6136 | 6556 | 6.81472372363 |
| NM_003128 | SPTBN1 | 5005 | 5355 | 6.35904423985 |
| NM_003128 | SPTBN1 | 1060 | 1664 | 7.55168931779 |
| NM_003128 | SPTBN1 | 8076 | 8439 | 6.68919284154 |
| NM_003128 | SPTBN1 | 4357 | 4584 | 5.87361741268 |
| NM_003659 | AGPS   | 571  | 618  | 2.95848376617 |
| NM_003659 | AGPS   | 309  | 350  | 3.96250113043 |
| NM_003659 | AGPS   | 762  | 801  | 2.96249463529 |
| NM_003659 | AGPS   | 809  | 928  | 4.28442946123 |
| NM_003659 | AGPS   | 1296 | 1357 | 2.96232761603 |
| NM_003659 | AGPS   | 630  | 728  | 4.54729011675 |
| NM_003659 | AGPS   | 1515 | 1687 | 4.96250136635 |
| NM_003659 | AGPS   | 1920 | 2008 | 1.96250136635 |
| NM_003659 | AGPS   | 2338 | 2439 | 2.96250113043 |
| NM_003659 | AGPS   | 2057 | 2173 | 3.54746386707 |

|              |          |      |      |               |               |
|--------------|----------|------|------|---------------|---------------|
| NM_021991    | JUP      | 1697 | 1758 | 6.90652145534 |               |
| NM_021991    | JUP      | 957  | 988  | 5.82639984613 |               |
| NM_021991    | JUP      | 994  | 1038 | 7.49532780592 |               |
| NM_021991    | JUP      | 256  | 285  | 5.90652145534 |               |
| NM_021991    | JUP      | 1075 | 1159 | 8.49550155624 |               |
| NM_021991    | JUP      | 703  | 753  | 5.91053905552 |               |
| NM_021991    | JUP      | 2996 | 3054 | 7.49550155624 |               |
| NM_021991    | JUP      | 497  | 560  | 5.91053905552 |               |
| NM_021991    | JUP      | 1454 | 1604 | 8.91053905552 |               |
| NM_021991    | JUP      | 795  | 952  | 8.49550155624 |               |
| NM_021991    | JUP      | 117  | 211  | 9.08046405696 |               |
| NM_021991    | JUP      | 576  | 643  | 7.91053905552 |               |
| NM_021991    | JUP      | 2232 | 2363 | 8.71789397758 |               |
| NM_021991    | JUP      | 2601 | 2760 | 8.91053905552 |               |
| NM_021991    | JUP      | 2019 | 2171 | 8.91053905552 |               |
| NM_021991    | JUP      | 2464 | 2579 | 7.49550155624 |               |
| NM_021991    | JUP      | 1172 | 1424 | 10.158466569  |               |
| NM_021991    | JUP      | 1781 | 1992 | 9.61097877366 |               |
| NM_006441    | MTHFS    | 216  | 270  | 9.7706679614  |               |
| NM_006440    | TXNRD2   | 1298 | 1379 | 9.19725976176 |               |
| NM_006440    | TXNRD2   | 1089 | 1139 | 8.11312078829 |               |
| NM_006440    | TXNRD2   | 450  | 516  | 8.11312078829 |               |
| NM_006440    | TXNRD2   | 1487 | 1551 | 9.78222249839 |               |
| NM_006440    | TXNRD2   | 1612 | 1738 | 10.1972599977 |               |
| NM_001035267 | RPL41    | 253  | 539  | 3.36457365331 |               |
| NM_001035267 | RPL41    | 73   | 248  | 1.2576584494  |               |
| NM_021999    | ITM2B    | 1128 | 1173 | 3.60064996917 |               |
| NM_021999    | ITM2B    | 971  | 1034 | 5.1856124699  |               |
| NM_021999    | ITM2B    | 310  | 434  | 6.2636149819  |               |
| NM_021999    | ITM2B    | 1514 | 1636 | 5.1856124699  |               |
| NM_021999    | ITM2B    | 435  | 937  | 8.58554307679 |               |
| NM_021999    | ITM2B    | 71   | 150  | 3.01568746846 |               |
| NM_021999    | ITM2B    | 209  | 305  | 3.01568746846 |               |
| NM_021999    | ITM2B    | 1185 | 1452 | 6.2636149819  |               |
| NM_006447    | USP16    | 2339 | 2392 | 5.7578251325  |               |
| NM_006447    | USP16    | 310  | 362  | 4.16901878193 |               |
| NM_018424    | EPB41L4B |      | 2127 | 2207          | 6.09689815924 |
| NM_018424    | EPB41L4B |      | 1375 | 1401          | 5.50791805857 |
| NM_018424    | EPB41L4B |      | 2035 | 2093          | 6.09689815924 |
| NM_018424    | EPB41L4B |      | 2237 | 2301          | 4.51193565119 |
| NM_018424    | EPB41L4B |      | 3433 | 3520          | 6.51193565852 |
| NM_018424    | EPB41L4B |      | 2716 | 2787          | 5.42779644936 |
| NM_018424    | EPB41L4B |      | 2918 | 2977          | 4.42779644936 |
| NM_018424    | EPB41L4B |      | 829  | 940           | 6.51193565874 |
| NM_018426    | TMEM63B  | 542  | 645  | 7.10175767097 |               |
| NM_018426    | TMEM63B  | 1505 | 1614 | 7.6867201717  |               |
| NM_018426    | TMEM63B  | 2200 | 2280 | 6.10175767097 |               |
| NM_018426    | TMEM63B  | 1162 | 1227 | 7.68672016415 |               |
| NM_018426    | TMEM63B  | 1423 | 1505 | 7.6867201717  |               |
| NM_018426    | TMEM63B  | 1648 | 1761 | 8.6867201717  |               |

|              |          |      |      |                    |
|--------------|----------|------|------|--------------------|
| NM_018426    | TMEM63B  | 1271 | 1332 | 7.68671993578      |
| NM_018427    | RRN3     | 1038 | 1136 | 6.78088958797      |
| NM_018427    | RRN3     | 407  | 438  | 4.7768719878       |
| NM_018427    | RRN3     | 334  | 383  | 6.7768719878       |
| NM_018427    | RRN3     | 1798 | 1852 | 4.78088958797      |
| NM_018427    | RRN3     | 2507 | 2557 | 6.69675037858      |
| NM_018427    | RRN3     | 1314 | 1460 | 8.68778018358      |
| NM_018427    | RRN3     | 713  | 803  | 4.78088958042      |
| NM_018427    | RRN3     | 1701 | 1798 | 4.78088958797      |
| NM_018427    | RRN3     | 186  | 308  | 6.36585208869      |
| NM_018427    | RRN3     | 2133 | 2301 | 6.78088958797      |
| NM_018427    | RRN3     | 1143 | 1227 | 4.78088958797      |
| NM_018427    | RRN3     | 1462 | 1564 | 7.36585208869      |
| NM_018427    | RRN3     | 483  | 621  | 6.78088958797      |
| NM_018427    | RRN3     | 921  | 1029 | 7.36585208869      |
| NM_018420    | SLC22A15 |      | 1023 | 1094 10.6127871607 |
| NM_018420    | SLC22A15 |      | 1331 | 1405 11.6087762916 |
| NM_001127358 | PHTF2    | 1489 | 1583 | 9.85099424937      |
| NM_001127358 | PHTF2    | 3945 | 3993 | 7.18189253926      |
| NM_001127358 | PHTF2    | 530  | 589  | 7.26603174865      |
| NM_001127358 | PHTF2    | 2382 | 2434 | 8.26585799833      |
| NM_001127358 | PHTF2    | 4306 | 4348 | 7.26585799833      |
| NM_001127358 | PHTF2    | 620  | 687  | 8.85099424915      |
| NM_001127358 | PHTF2    | 192  | 348  | 9.26603174865      |
| NM_001127358 | PHTF2    | 3836 | 3896 | 7.2660317411       |
| NM_001127358 | PHTF2    | 2010 | 2060 | 8.85099401345      |
| NM_001127358 | PHTF2    | 3654 | 3718 | 8.26585799833      |
| NM_001127358 | PHTF2    | 2570 | 2646 | 8.85099424937      |
| NM_001127358 | PHTF2    | 2249 | 2294 | 9.2660317411       |
| NM_001127358 | PHTF2    | 2505 | 2548 | 8.26585799833      |
| NM_001127358 | PHTF2    | 2065 | 2134 | 8.85099424937      |
| NM_001127358 | PHTF2    | 796  | 981  | 10.2660317486      |
| NM_001127358 | PHTF2    | 382  | 447  | 7.26603151273      |
| NM_001127358 | PHTF2    | 1584 | 1841 | 11.5139592621      |
| NM_001127358 | PHTF2    | 1842 | 1994 | 9.85099424937      |
| NM_001127358 | PHTF2    | 2298 | 2375 | 8.85099424937      |
| NM_001127358 | PHTF2    | 1260 | 1349 | 8.85099424937      |
| NM_001127358 | PHTF2    | 1007 | 1190 | 9.85099424937      |
| NM_018060    | IARS2    | 2298 | 2331 | 4.19175000874      |
| NM_018060    | IARS2    | 3092 | 3128 | 4.19175001606      |
| NM_018060    | IARS2    | 2163 | 2237 | 5.51367811117      |
| NM_018060    | IARS2    | 3388 | 3443 | 4.19174978037      |
| NM_018060    | IARS2    | 2645 | 2872 | 6.99910493834      |
| NM_018060    | IARS2    | 2920 | 2989 | 4.19175000874      |
| NM_018060    | IARS2    | 3342 | 3381 | 4.77671228109      |
| NM_018060    | IARS2    | 593  | 643  | 4.77671251701      |
| NM_018060    | IARS2    | 3033 | 3081 | 4.77653876669      |
| NM_018060    | IARS2    | 82   | 131  | 3.18773241611      |
| NM_018060    | IARS2    | 518  | 581  | 4.77671250946      |
| NM_018060    | IARS2    | 320  | 406  | 4.19175001606      |

|              |         |      |      |               |
|--------------|---------|------|------|---------------|
| NM_018060    | IARS2   | 2110 | 2160 | 5.19174328523 |
| NM_018060    | IARS2   | 936  | 1151 | 7.36167501773 |
| NM_018060    | IARS2   | 1592 | 1687 | 6.51367811117 |
| NM_018060    | IARS2   | 744  | 931  | 6.77671251701 |
| NM_018060    | IARS2   | 2343 | 2425 | 5.51367811117 |
| NM_018060    | IARS2   | 1258 | 1590 | 8.27921285754 |
| NM_018060    | IARS2   | 3128 | 3272 | 3.19175001629 |
| NM_018060    | IARS2   | 1155 | 1229 | 5.99910493834 |
| NM_018060    | IARS2   | 1692 | 1948 | 8.14594632667 |
| NM_018060    | IARS2   | 2428 | 2638 | 8.23614413565 |
| NM_018060    | IARS2   | 414  | 518  | 6.36167501773 |
| NM_018060    | IARS2   | 2010 | 2090 | 5.19175001629 |
| NM_018060    | IARS2   | 222  | 293  | 3.19157626597 |
| NM_001128835 | TRAPPC2 | 1421 | 1514 | 6.35266541623 |
| NM_018434    | RNF130  | 1652 | 1726 | 6.17064542157 |
| NM_018434    | RNF130  | 846  | 1017 | 8.17466302174 |
| NM_018434    | RNF130  | 1116 | 1219 | 6.17466302152 |
| NM_018434    | RNF130  | 1275 | 1423 | 6.17466302174 |
| NM_018434    | RNF130  | 652  | 749  | 7.17466302174 |
| NM_018428    | UTP6    | 1112 | 1164 | 4.13396811044 |
| NM_018428    | UTP6    | 316  | 369  | 5.13397483394 |
| NM_018428    | UTP6    | 47   | 139  | 5.12995724132 |
| NM_018428    | UTP6    | 1692 | 1804 | 6.13397484149 |
| NM_018428    | UTP6    | 396  | 504  | 5.13397484149 |
| NM_018428    | UTP6    | 1277 | 1349 | 5.04983563211 |
| NM_130838    | UBE3A   | 1786 | 1869 | 6.224185984   |
| NM_130838    | UBE3A   | 2514 | 2567 | 5.14004677461 |
| NM_130838    | UBE3A   | 1691 | 1717 | 4.14004677461 |
| NM_130838    | UBE3A   | 70   | 128  | 5.22418597645 |
| NM_130838    | UBE3A   | 758  | 843  | 5.80914847717 |
| NM_130838    | UBE3A   | 368  | 419  | 4.22016838382 |
| NM_130838    | UBE3A   | 1265 | 1332 | 4.22401223368 |
| NM_130838    | UBE3A   | 4355 | 4412 | 4.22016838382 |
| NM_130838    | UBE3A   | 1412 | 1491 | 6.224185984   |
| NM_130838    | UBE3A   | 425  | 517  | 4.22417925294 |
| NM_130838    | UBE3A   | 1516 | 1673 | 6.80914848472 |
| NM_015093    | TAB2    | 1952 | 2011 | 5.78213632588 |
| NM_015093    | TAB2    | 3938 | 3993 | 4.86627529935 |
| NM_015093    | TAB2    | 1426 | 1483 | 4.86627529935 |
| NM_015093    | TAB2    | 572  | 633  | 4.86225793509 |
| NM_015093    | TAB2    | 1062 | 1135 | 4.86627529935 |
| NM_015093    | TAB2    | 1849 | 1936 | 4.86610178495 |
| NM_001498    | GCLC    | 1777 | 1836 | 3.67298081378 |
| NM_001498    | GCLC    | 1610 | 1699 | 4.99491563972 |
| NM_001498    | GCLC    | 641  | 722  | 4.99491563972 |
| NM_001498    | GCLC    | 1105 | 1170 | 3.66896994466 |
| NM_001498    | GCLC    | 882  | 962  | 3.66896994466 |
| NM_001498    | GCLC    | 1274 | 1347 | 5.48034246689 |
| NM_001498    | GCLC    | 2067 | 2190 | 4.67298754483 |
| NM_001498    | GCLC    | 2346 | 2400 | 2.67281379452 |

|           |        |      |      |               |
|-----------|--------|------|------|---------------|
| NM_001498 | GCLC   | 2727 | 2802 | 3.67298754461 |
| NM_001498 | GCLC   | 1349 | 1488 | 3.67298754483 |
| NM_002388 | MCM3   | 924  | 1017 | 5.87399661766 |
| NM_002388 | MCM3   | 1409 | 1463 | 5.38856979049 |
| NM_002388 | MCM3   | 1742 | 1792 | 6.0666416956  |
| NM_002388 | MCM3   | 846  | 923  | 5.0666416956  |
| NM_002388 | MCM3   | 2619 | 2670 | 4.06663496455 |
| NM_002388 | MCM3   | 2996 | 3081 | 5.87399661766 |
| NM_002388 | MCM3   | 2915 | 2991 | 4.0666416956  |
| NM_002388 | MCM3   | 173  | 203  | 2.98250248622 |
| NM_002388 | MCM3   | 1583 | 1732 | 6.65160419632 |
| NM_002388 | MCM3   | 1518 | 1554 | 3.98250248622 |
| NM_002388 | MCM3   | 2724 | 2781 | 4.65160418877 |
| NM_002388 | MCM3   | 2328 | 2409 | 3.06646794528 |
| NM_002388 | MCM3   | 1047 | 1218 | 5.87399661766 |
| NM_002388 | MCM3   | 426  | 766  | 7.97353229121 |
| NM_002388 | MCM3   | 208  | 424  | 6.52607331424 |
| NM_002388 | MCM3   | 1954 | 2244 | 6.0666416956  |
| NM_002388 | MCM3   | 1796 | 1913 | 5.0666416956  |
| NM_002388 | MCM3   | 2460 | 2591 | 5.87399661766 |
| NM_002834 | PTPN11 | 3112 | 3193 | 5.96390887972 |
| NM_002834 | PTPN11 | 3565 | 3620 | 4.95989127955 |
| NM_002834 | PTPN11 | 875  | 981  | 7.13383388117 |
| NM_002834 | PTPN11 | 4828 | 4908 | 3.95989127955 |
| NM_002834 | PTPN11 | 1859 | 1918 | 3.96390887972 |
| NM_002834 | PTPN11 | 4195 | 4250 | 5.54887138044 |
| NM_002834 | PTPN11 | 2836 | 2891 | 5.54887138044 |
| NM_002834 | PTPN11 | 3629 | 3730 | 6.2858369746  |
| NM_002834 | PTPN11 | 807  | 870  | 5.54869763013 |
| NM_002834 | PTPN11 | 5817 | 5885 | 5.96390887972 |
| NM_002834 | PTPN11 | 5176 | 5241 | 6.77126380178 |
| NM_002834 | PTPN11 | 2186 | 2244 | 3.95989127955 |
| NM_002834 | PTPN11 | 2900 | 3072 | 5.96390887972 |
| NM_002834 | PTPN11 | 4985 | 5047 | 3.9637351294  |
| NM_002834 | PTPN11 | 2246 | 2368 | 3.96390887972 |
| NM_002834 | PTPN11 | 5116 | 5171 | 3.9637351294  |
| NM_002834 | PTPN11 | 1029 | 1094 | 4.96390214867 |
| NM_002834 | PTPN11 | 4360 | 4569 | 7.13383388117 |
| NM_002834 | PTPN11 | 462  | 741  | 8.13383388117 |
| NM_002834 | PTPN11 | 1385 | 1460 | 5.54887138044 |
| NM_002834 | PTPN11 | 5293 | 5402 | 5.96390887972 |
| NM_002834 | PTPN11 | 1472 | 1629 | 5.96390887972 |
| NM_002834 | PTPN11 | 1708 | 1849 | 6.54887138044 |
| NM_002835 | PTPN12 | 2642 | 2702 | 4.6565969372  |
| NM_002835 | PTPN12 | 2702 | 2749 | 5.24155943792 |
| NM_002835 | PTPN12 | 1419 | 1487 | 5.57245772782 |
| NM_002835 | PTPN12 | 3013 | 3194 | 6.6565969372  |
| NM_002835 | PTPN12 | 891  | 965  | 3.65659670128 |
| NM_002835 | PTPN12 | 1125 | 1214 | 3.65659693698 |
| NM_002835 | PTPN12 | 698  | 741  | 6.82652193864 |



|              |         |      |      |                 |
|--------------|---------|------|------|-----------------|
| NM_002835    | PTPN12  | 2375 | 2454 | 3.65659693698   |
| NM_002835    | PTPN12  | 1775 | 1975 | 6.97852503209   |
| NM_002835    | PTPN12  | 2072 | 2257 | 6.46395185926   |
| NM_002835    | PTPN12  | 1540 | 1699 | 6.24155943792   |
| NM_002835    | PTPN12  | 767  | 854  | 6.46395185926   |
| NM_002835    | PTPN12  | 396  | 545  | 4.6565969372    |
| NM_002835    | PTPN12  | 1295 | 1385 | 4.65659020615   |
| NM_002835    | PTPN12  | 554  | 697  | 7.46395185926   |
| NM_015091    | FAM179B | 937  | 982  | 8.49956161658   |
| NM_015091    | FAM179B | 3187 | 3259 | 9.49956161658   |
| NM_002383    | MAZ     | 1025 | 1096 | 5.31046455035   |
| NM_002383    | MAZ     | 210  | 286  | 4.31046455034   |
| NM_002383    | MAZ     | 1102 | 1264 | 6.1178194724    |
| NM_002383    | MAZ     | 976  | 1019 | 4.30644695017   |
| NM_002383    | MAZ     | 1286 | 1484 | 6.76989616898   |
| NM_002383    | MAZ     | 819  | 905  | 4.89542705107   |
| NM_002383    | MAZ     | 660  | 793  | 4.31046455035   |
| NM_002383    | MAZ     | 2158 | 2222 | 4.89542705107   |
| NM_002383    | MAZ     | 2381 | 2528 | 6.31046455035   |
| NM_002383    | MAZ     | 1714 | 1979 | 7.89542705107   |
| NM_002381    | MATN3   | 827  | 883  | 5.90943115285   |
| NM_002381    | MATN3   | 1423 | 1496 | 5.90960489561   |
| NM_002381    | MATN3   | 971  | 1102 | 6.64657049733   |
| NM_001204306 | GC      | 175  | 1822 | 20.2345470419   |
| NM_005381    | NCL     | 199  | 273  | -0.797691545044 |
| NM_005381    | NCL     | 1122 | 1260 | 3.72587041101   |
| NM_005381    | NCL     | 1042 | 1116 | 2.3722334564    |
| NM_005381    | NCL     | 289  | 322  | -0.797865295361 |
| NM_005381    | NCL     | 1272 | 1333 | -0.797691545043 |
| NM_005381    | NCL     | 1773 | 2015 | 3.59462587774   |
| NM_005381    | NCL     | 684  | 827  | 1.52423654984   |
| NM_005381    | NCL     | 1344 | 1616 | 3.3722334564    |
| NM_005381    | NCL     | 4    | 177  | 3.00966337701   |
| NM_005381    | NCL     | 828  | 899  | -0.797691545043 |
| NM_005381    | NCL     | 2019 | 2151 | 2.00966337701   |
| NM_005381    | NCL     | 2235 | 2554 | 4.52423654984   |
| NM_005381    | NCL     | 1697 | 1773 | 0.202134704639  |
| NM_152778    | MFSD8   | 1307 | 1349 | 10.3823001424   |
| NM_152778    | MFSD8   | 980  | 1012 | 8.37828277815   |
| NM_152778    | MFSD8   | 294  | 378  | 10.7042284732   |
| NM_005385    | NKTR    | 6958 | 7010 | 4.63134499514   |
| NM_005385    | NKTR    | 5173 | 5234 | 5.21246364601   |
| NM_005385    | NKTR    | 1001 | 1089 | 5.21648124618   |
| NM_005385    | NKTR    | 5022 | 5085 | 5.63151874545   |
| NM_005385    | NKTR    | 710  | 774  | 5.1323420368    |
| NM_005385    | NKTR    | 544  | 637  | 3.63151873791   |
| NM_005385    | NKTR    | 4895 | 5006 | 4.63151850954   |
| NM_005385    | NKTR    | 7036 | 7166 | 6.21648124618   |
| NM_005384    | NFIL3   | 186  | 239  | 3.4458026661    |
| NM_005384    | NFIL3   | 642  | 750  | 4.03093891713   |

|              |           |      |      |               |               |
|--------------|-----------|------|------|---------------|---------------|
| NM_005389    | PCMT1     | 960  | 993  | 5.0234008096  |               |
| NM_005389    | PCMT1     | 290  | 328  | 5.0234008096  |               |
| NM_005389    | PCMT1     | 1411 | 1480 | 5.02357455992 |               |
| NM_005389    | PCMT1     | 343  | 662  | 9.63828440404 |               |
| NM_005389    | PCMT1     | 1503 | 1705 | 7.34550265481 |               |
| NM_005389    | PCMT1     | 664  | 944  | 8.34550265481 |               |
| NM_005389    | PCMT1     | 119  | 257  | 7.93046515553 |               |
| NM_005389    | PCMT1     | 1018 | 1151 | 7.48300617856 |               |
| NM_005389    | PCMT1     | 1173 | 1394 | 8.27150207336 |               |
| NM_005388    | PDCL      | 1023 | 1102 | 6.02150257116 |               |
| NM_005388    | PDCL      | 931  | 1004 | 6.02150929467 |               |
| NM_005388    | PDCL      | 1121 | 1204 | 6.02150257116 |               |
| NM_032204    | ASCC2     | 137  | 223  | 5.8458426339  |               |
| NM_032204    | ASCC2     | 1332 | 1354 | 5.84182503373 |               |
| NM_032204    | ASCC2     | 600  | 667  | 7.43080489871 |               |
| NM_032204    | ASCC2     | 861  | 980  | 8.16777072879 |               |
| NM_032204    | ASCC2     | 334  | 432  | 7.43080513463 |               |
| NM_001497    | B4GALT1   | 1351 | 1413 | 6.84887036391 |               |
| NM_001497    | B4GALT1   | 1934 | 1974 | 7.43382614112 |               |
| NM_001497    | B4GALT1   | 4037 | 4085 | 7.43383286463 |               |
| NM_001497    | B4GALT1   | 4088 | 4140 | 7.43383286463 |               |
| NM_001497    | B4GALT1   | 2746 | 2823 | 7.84887037146 |               |
| NM_001497    | B4GALT1   | 3654 | 3702 | 7.84887036391 |               |
| NM_001497    | B4GALT1   | 1429 | 1482 | 6.84887037123 |               |
| NM_001497    | B4GALT1   | 1761 | 1820 | 8.17079846634 |               |
| NM_001497    | B4GALT1   | 2084 | 2133 | 6.84485277128 |               |
| NM_001497    | B4GALT1   | 1259 | 1340 | 8.65622529351 |               |
| NM_001497    | B4GALT1   | 3322 | 3377 | 7.429815272   |               |
| NM_001497    | B4GALT1   | 1509 | 1623 | 8.65622529351 |               |
| NM_001497    | B4GALT1   | 484  | 521  | 7.429815272   |               |
| NM_001497    | B4GALT1   | 3427 | 3476 | 6.76473116207 |               |
| NM_001497    | B4GALT1   | 252  | 399  | 8.43383287218 |               |
| NM_001497    | B4GALT1   | 993  | 1097 | 8.43383287218 |               |
| NM_001497    | B4GALT1   | 3806 | 3891 | 8.43383287218 |               |
| NM_001497    | B4GALT1   | 1182 | 1256 | 6.84887037145 |               |
| NM_001497    | B4GALT1   | 847  | 958  | 9.84887037146 |               |
| NM_001497    | B4GALT1   | 610  | 722  | 8.84887037146 |               |
| NM_001202438 | C10orf137 |      | 2376 | 2413          | 6.86865647318 |
| NM_001202438 | C10orf137 |      | 771  | 866           | 8.45763656653 |
| NM_001202438 | C10orf137 |      | 2084 | 2146          | 7.86865647318 |
| NM_001202438 | C10orf137 |      | 707  | 767           | 7.87250032304 |
| NM_001202439 | B7H6      | 988  | 1075 | 10.3443050558 |               |
| NM_001202439 | B7H6      | 1615 | 1677 | 9.53695013375 |               |
| NM_001202439 | B7H6      | 1322 | 1391 | 9.53695013375 |               |
| NM_001202439 | B7H6      | 1873 | 1938 | 9.5369501262  |               |
| NM_001202439 | B7H6      | 908  | 981  | 9.85887822864 |               |
| NM_001202439 | B7H6      | 1076 | 1156 | 10.7068751352 |               |
| NM_001202439 | B7H6      | 5102 | 5152 | 8.45281092436 |               |
| NM_001202439 | B7H6      | 2872 | 2945 | 7.53694340269 |               |
| NM_001202439 | B7H6      | 5364 | 5397 | 7.45281092436 |               |

|              |          |      |      |                    |
|--------------|----------|------|------|--------------------|
| NM_001202439 | B7H6     | 1249 | 1303 | 8.5369501262       |
| NM_001202439 | B7H6     | 48   | 127  | 7.53695013375      |
| NM_001202439 | B7H6     | 814  | 908  | 10.3443050558      |
| NM_001202439 | B7H6     | 3314 | 3371 | 8.53293253358      |
| NM_001202439 | B7H6     | 244  | 440  | 11.2373898519      |
| NM_001202439 | B7H6     | 3490 | 3531 | 7.53293253358      |
| NM_001202439 | B7H6     | 2628 | 2727 | 8.53293253358      |
| NM_001202439 | B7H6     | 618  | 699  | 9.12191263446      |
| NM_001202439 | B7H6     | 1162 | 1235 | 7.5369501262       |
| NM_004240    | TRIP10   | 834  | 883  | 3.20758512615      |
| NM_004240    | TRIP10   | 1119 | 1164 | 4.2035675262       |
| NM_004240    | TRIP10   | 126  | 164  | 3.20758512615      |
| NM_004240    | TRIP10   | 1780 | 1859 | 5.20758512637      |
| NM_004240    | TRIP10   | 1863 | 1928 | 4.79254762709      |
| NM_004240    | TRIP10   | 729  | 776  | 4.20757839532      |
| NM_004240    | TRIP10   | 302  | 396  | 4.20758512637      |
| NM_004240    | TRIP10   | 1268 | 1353 | 4.79254762709      |
| NM_001202431 | PRDX1    | 885  | 1001 | 4.84319854375      |
| NM_001202431 | PRDX1    | 196  | 510  | 8.42816104447      |
| NM_001202431 | PRDX1    | 513  | 875  | 7.87294588714      |
| NM_001799    | CDK7     | 726  | 797  | 4.13494888613      |
| NM_001799    | CDK7     | 836  | 945  | 6.21908809552      |
| NM_001799    | CDK7     | 958  | 1050 | 5.80405059602      |
| NM_001799    | CDK7     | 306  | 362  | 5.2190878596       |
| NM_005772    | RCL1     | 1898 | 1967 | 6.38550888977      |
| NM_005772    | RCL1     | 683  | 734  | 7.38567590903      |
| NM_005772    | RCL1     | 1213 | 1271 | 7.38166503992      |
| NM_152592    | C14orf49 |      | 2484 | 2535 9.19181994637 |
| NM_152594    | SPRED1   | 329  | 405  | 9.22808086858      |
| NM_001079559 | HNRNPUL2 |      | 2942 | 3000 3.61954361116 |
| NM_001079559 | HNRNPUL2 |      | 4063 | 4122 5.208516981   |
| NM_001079559 | HNRNPUL2 |      | 1508 | 1553 5.20852371205 |
| NM_001079559 | HNRNPUL2 |      | 1573 | 1639 4.62356121133 |
| NM_001079559 | HNRNPUL2 |      | 1043 | 1117 5.20852371205 |
| NM_001079559 | HNRNPUL2 |      | 4862 | 4915 4.62338746101 |
| NM_001079559 | HNRNPUL2 |      | 2288 | 2398 5.94548930622 |
| NM_001079559 | HNRNPUL2 |      | 745  | 785 4.53942200195  |
| NM_001079559 | HNRNPUL2 |      | 1929 | 2068 5.94548930622 |
| NM_001079559 | HNRNPUL2 |      | 1141 | 1202 3.53942200195 |
| NM_001079559 | HNRNPUL2 |      | 1779 | 1928 6.43091613339 |
| NM_001079559 | HNRNPUL2 |      | 1653 | 1768 5.94548930622 |
| NM_001079559 | HNRNPUL2 |      | 1203 | 1489 8.01587863411 |
| NM_001079559 | HNRNPUL2 |      | 867  | 1015 7.08299282997 |
| NM_001163809 | WDR81    | 999  | 1085 | 8.65444814472      |
| NM_001163809 | WDR81    | 4824 | 4883 | 8.65427440195      |
| NM_001163809 | WDR81    | 2908 | 2976 | 10.2394106528      |
| NM_001163809 | WDR81    | 2302 | 2353 | 8.65043055209      |
| NM_001163809 | WDR81    | 2733 | 2789 | 8.65444142121      |
| NM_001163809 | WDR81    | 5392 | 5451 | 9.65444791635      |
| NM_001163809 | WDR81    | 1151 | 1179 | 8.65043055209      |

|              |           |      |      |                    |
|--------------|-----------|------|------|--------------------|
| NM_001163809 | WDR81     | 412  | 471  | 10.2353930528      |
| NM_001163809 | WDR81     | 777  | 829  | 8.65444814472      |
| NM_001163809 | WDR81     | 5839 | 5884 | 8.65444142121      |
| NM_001163809 | WDR81     | 5522 | 5606 | 10.6544481523      |
| NM_002823    | PTMA      | 795  | 924  | 6.24620248849      |
| NM_002823    | PTMA      | 3    | 59   | 4.09936110016      |
| NM_002823    | PTMA      | 657  | 741  | 2.87696867882      |
| NM_002823    | PTMA      | 1091 | 1160 | 4.61393427299      |
| NM_002823    | PTMA      | 84   | 377  | 5.75143779674      |
| NM_002823    | PTMA      | 381  | 535  | 4.46193117954      |
| NM_002823    | PTMA      | 957  | 1072 | 5.19889677371      |
| NM_002823    | PTMA      | 536  | 643  | 3.2920061781       |
| NM_015670    | SENP3     | 1855 | 1914 | 8.39271456868      |
| NM_015670    | SENP3     | 2122 | 2206 | 7.80775206795      |
| NM_015670    | SENP3     | 869  | 1032 | 9.12968016284      |
| NM_015670    | SENP3     | 1921 | 2042 | 7.80775206795      |
| NM_015670    | SENP3     | 1433 | 1560 | 8.80775206795      |
| NM_015676    | C14orf109 |      | 538  | 584 9.40036527623  |
| NM_001171613 | PREPL     | 999  | 1059 | 7.24737180668      |
| NM_001171613 | PREPL     | 2129 | 2170 | 4.65839170579      |
| NM_001171613 | PREPL     | 1065 | 1202 | 8.1218409246       |
| NM_001171613 | PREPL     | 4288 | 4327 | 4.57827009658      |
| NM_001171613 | PREPL     | 415  | 471  | 6.9843306698       |
| NM_001171613 | PREPL     | 1656 | 1788 | 6.24335420651      |
| NM_001171613 | PREPL     | 1330 | 1432 | 6.66240930596      |
| NM_001171613 | PREPL     | 704  | 822  | 6.98433740085      |
| NM_018287    | ARHGAP12  |      | 3496 | 3532 5.60256184738 |
| NM_018287    | ARHGAP12  |      | 3765 | 3813 4.68670104921 |
| NM_018287    | ARHGAP12  |      | 2310 | 2373 4.60256184738 |
| NM_018287    | ARHGAP12  |      | 3173 | 3262 6.27166355726 |
| NM_018287    | ARHGAP12  |      | 4484 | 4571 6.27166355748 |
| NM_018287    | ARHGAP12  |      | 198  | 239 7.0086224206   |
| NM_018287    | ARHGAP12  |      | 3015 | 3083 6.27148980717 |
| NM_018287    | ARHGAP12  |      | 297  | 389 5.68670104921  |
| NM_018287    | ARHGAP12  |      | 4001 | 4124 5.68669432571 |
| NM_018289    | VPS53     | 1765 | 1824 | 6.35374377901      |
| NM_018289    | VPS53     | 1341 | 1407 | 7.93888002982      |
| NM_018289    | VPS53     | 1585 | 1640 | 6.34989992915      |
| NM_018289    | VPS53     | 992  | 1082 | 6.35391752177      |
| NM_015679    | TRUB2     | 1323 | 1364 | 7.95761681719      |
| NM_015679    | TRUB2     | 1045 | 1090 | 7.28851510708      |
| NM_015679    | TRUB2     | 271  | 361  | 7.95761681697      |
| NM_000940    | PON3      | 863  | 942  | 9.9464311981       |
| NM_000940    | PON3      | 820  | 856  | 8.94643119787      |
| NM_000940    | PON3      | 992  | 1035 | 8.94241359792      |
| NM_000940    | PON3      | 1050 | 1117 | 9.9464311981       |
| NM_000940    | PON3      | 50   | 95   | 7.94625744778      |
| NM_000940    | PON3      | 595  | 706  | 9.9464311981       |
| NM_000940    | PON3      | 394  | 557  | 11.268359293       |
| NM_000940    | PON3      | 97   | 229  | 11.268359293       |

|              |         |      |      |               |
|--------------|---------|------|------|---------------|
| NM_000940    | PON3    | 725  | 817  | 8.9464311981  |
| NM_000940    | PON3    | 240  | 355  | 9.53139369882 |
| NM_017917    | PPP2R3C | 1669 | 1741 | 6.44137322087 |
| NM_017917    | PPP2R3C | 1221 | 1315 | 5.85641072015 |
| NM_002526    | NT5E    | 2084 | 2144 | 8.69025850493 |
| NM_002526    | NT5E    | 3431 | 3488 | 6.36833040982 |
| NM_002526    | NT5E    | 2868 | 2949 | 8.3683304025  |
| NM_002526    | NT5E    | 2228 | 2288 | 9.1756853321  |
| NM_002526    | NT5E    | 1723 | 1815 | 9.1756853321  |
| NM_002526    | NT5E    | 1126 | 1295 | 9.53825541149 |
| NM_002526    | NT5E    | 625  | 711  | 7.36833041005 |
| NM_002526    | NT5E    | 2146 | 2214 | 6.36833017413 |
| NM_002526    | NT5E    | 3552 | 3642 | 7.36833041004 |
| NM_002526    | NT5E    | 1904 | 2060 | 9.1756853321  |
| NM_002526    | NT5E    | 2674 | 2737 | 7.36431280987 |
| NM_002526    | NT5E    | 3286 | 3364 | 8.69025850493 |
| NM_002526    | NT5E    | 3662 | 3717 | 7.36832367899 |
| NM_002526    | NT5E    | 833  | 1089 | 10.6162579235 |
| NM_002526    | NT5E    | 1530 | 1707 | 9.95329291077 |
| NM_002526    | NT5E    | 2292 | 2462 | 9.69025850493 |
| NM_002526    | NT5E    | 2762 | 2856 | 7.95329291077 |
| NM_002526    | NT5E    | 1398 | 1504 | 9.1756853321  |
| NM_002526    | NT5E    | 762  | 810  | 6.36431280987 |
| NM_002524    | NRAS    | 3764 | 3818 | 5.6440073122  |
| NM_002524    | NRAS    | 1334 | 1387 | 4.06306241165 |
| NM_002524    | NRAS    | 2292 | 2338 | 5.0630556806  |
| NM_002524    | NRAS    | 289  | 371  | 5.64802467645 |
| NM_002524    | NRAS    | 1542 | 1590 | 5.06306217573 |
| NM_002524    | NRAS    | 1396 | 1451 | 5.0630556806  |
| NM_002524    | NRAS    | 3072 | 3117 | 5.0630556806  |
| NM_002524    | NRAS    | 1002 | 1053 | 5.0630556806  |
| NM_002524    | NRAS    | 3698 | 3755 | 3.97892320227 |
| NM_002524    | NRAS    | 2745 | 2800 | 5.05904481148 |
| NM_002524    | NRAS    | 751  | 804  | 5.0630624041  |
| NM_002524    | NRAS    | 2542 | 2597 | 4.05904481148 |
| NM_002524    | NRAS    | 853  | 899  | 4.97892320227 |
| NM_002524    | NRAS    | 552  | 672  | 6.64802491237 |
| NM_002524    | NRAS    | 390  | 441  | 5.64801818132 |
| NM_002524    | NRAS    | 4255 | 4319 | 5.05904481148 |
| NM_002524    | NRAS    | 3500 | 3591 | 5.05904481148 |
| NM_002524    | NRAS    | 1054 | 1117 | 4.0630624041  |
| NM_002524    | NRAS    | 204  | 282  | 5.64802491237 |
| NM_002524    | NRAS    | 1225 | 1326 | 5.0630556806  |
| NM_001144013 | RGPD3   | 1046 | 1125 | 9.65847605542 |
| NM_001144013 | RGPD3   | 1216 | 1269 | 8.6583023051  |
| NM_001144013 | RGPD3   | 1129 | 1165 | 6.98937434531 |
| NM_001144013 | RGPD3   | 2795 | 2877 | 8.06949595452 |
| NM_001144013 | RGPD3   | 682  | 769  | 9.39544164958 |
| NM_001144013 | RGPD3   | 3100 | 3186 | 8.0735135547  |
| NM_001144013 | RGPD3   | 3503 | 3683 | 8.0735135547  |

|              |          |      |      |                   |
|--------------|----------|------|------|-------------------|
| NM_001144013 | RGPD3    | 478  | 590  | 9.39544164958     |
| NM_001144013 | RGPD3    | 1905 | 2011 | 7.0735135547      |
| NM_001144013 | RGPD3    | 4357 | 4435 | 8.07351355469     |
| NM_001144012 | TMX2     | 866  | 927  | 6.6692962398      |
| NM_001144012 | TMX2     | 1452 | 1578 | 7.34736814491     |
| NM_001144012 | TMX2     | 678  | 822  | 7.15472306697     |
| NM_001144012 | TMX2     | 94   | 651  | 10.2300111943     |
| NM_001144012 | TMX2     | 951  | 1127 | 7.15472306697     |
| NM_001144012 | TMX2     | 1161 | 1339 | 7.34736814491     |
| NM_002824    | PTMS     | 310  | 409  | 3.44257616531     |
| NM_002824    | PTMS     | 589  | 641  | 4.44257616531     |
| NM_002824    | PTMS     | 707  | 1052 | 8.44257616531     |
| NM_002824    | PTMS     | 455  | 559  | 3.44257616531     |
| NM_212539    | PRKCD    | 2390 | 2455 | 5.79382969319     |
| NM_015016    | MAST3    | 4225 | 4284 | 9.45558607974     |
| NM_015016    | MAST3    | 4388 | 4427 | 8.45557934891     |
| NM_015016    | MAST3    | 3025 | 3081 | 8.37144687058     |
| NM_015016    | MAST3    | 1447 | 1487 | 8.45541232964     |
| NM_015012    | TMEM41B  | 1998 | 2064 | 7.6258138215      |
| NM_015012    | TMEM41B  | 3065 | 3113 | 7.62564007118     |
| NM_015012    | TMEM41B  | 2797 | 2846 | 8.36277941566     |
| NM_015012    | TMEM41B  | 311  | 379  | 7.04085131323     |
| NM_015012    | TMEM41B  | 3281 | 3353 | 9.04085132078     |
| NM_015012    | TMEM41B  | 1341 | 1404 | 8.36277268461     |
| NM_015012    | TMEM41B  | 968  | 1005 | 7.04067757046     |
| NM_015012    | TMEM41B  | 2884 | 2946 | 7.04085132056     |
| NM_015012    | TMEM41B  | 3848 | 3913 | 8.36277940812     |
| NM_015012    | TMEM41B  | 1574 | 1622 | 6.04085108486     |
| NM_015012    | TMEM41B  | 2953 | 3055 | 8.36277941567     |
| NM_015012    | TMEM41B  | 691  | 859  | 10.8482062428     |
| NM_015012    | TMEM41B  | 1203 | 1253 | 6.04067757046     |
| NM_015012    | TMEM41B  | 3634 | 3747 | 9.04085132078     |
| NM_015012    | TMEM41B  | 864  | 967  | 8.6258138215      |
| NM_015012    | TMEM41B  | 406  | 545  | 8.84820624284     |
| NM_015012    | TMEM41B  | 3419 | 3485 | 6.04085131323     |
| NM_015012    | TMEM41B  | 1012 | 1163 | 10.4331687436     |
| NM_015012    | TMEM41B  | 163  | 277  | 7.6258138215      |
| NM_015012    | TMEM41B  | 2122 | 2184 | 8.04084458973     |
| NM_015012    | TMEM41B  | 569  | 681  | 8.36277941567     |
| NM_173825    | RABL3    | 419  | 489  | 7.46374615479     |
| NM_173827    | COX18    | 733  | 801  | 11.6487732876     |
| NM_173827    | COX18    | 2283 | 2312 | 10.067821656      |
| NM_173827    | COX18    | 2101 | 2185 | 11.0678283871     |
| NM_173829    | SREK1IP1 |      | 198  | 236 6.66618271912 |
| NM_173829    | SREK1IP1 |      | 1636 | 1695 5.0812202184 |
| NM_003904    | ZNF259   | 575  | 635  | 4.30600046449     |
| NM_003904    | ZNF259   | 436  | 513  | 5.89096969626     |
| NM_003904    | ZNF259   | 862  | 926  | 5.30198959537     |
| NM_003904    | ZNF259   | 338  | 434  | 4.30583344522     |
| NM_022484    | TMEM168  | 2113 | 2166 | 8.26645980157     |

|           |          |      |      |               |               |
|-----------|----------|------|------|---------------|---------------|
| NM_022484 | TMEM168  | 1093 | 1161 | 9.34658141078 |               |
| NM_022484 | TMEM168  | 899  | 958  | 8.3505922799  |               |
| NM_022484 | TMEM168  | 1755 | 1895 | 11.157953933  |               |
| NM_022484 | TMEM168  | 1235 | 1367 | 8.35059901095 |               |
| NM_058219 | EXOSC6   | 961  | 1021 | 8.63360119978 |               |
| NM_058219 | EXOSC6   | 1255 | 1345 | 7.0486387066  |               |
| NM_005627 | SGK1     | 903  | 975  | 5.25942942078 |               |
| NM_005627 | SGK1     | 1002 | 1050 | 4.25942268973 |               |
| NM_005627 | SGK1     | 1797 | 1861 | 6.58135751567 |               |
| NM_005627 | SGK1     | 2150 | 2234 | 4.25942942056 |               |
| NM_005627 | SGK1     | 1341 | 1500 | 7.06678434284 |               |
| NM_005627 | SGK1     | 210  | 298  | 5.84037432133 |               |
| NM_005627 | SGK1     | 719  | 855  | 6.58135751567 |               |
| NM_024121 | TMEM185B |      | 1149 | 1198          | 11.6800894989 |
| NM_024121 | TMEM185B |      | 1905 | 2007          | 9.68008949888 |
| NM_024121 | TMEM185B |      | 2057 | 2097          | 11.6800894987 |
| NM_024121 | TMEM185B |      | 5511 | 5621          | 10.6800894989 |
| NM_024121 | TMEM185B |      | 4600 | 4647          | 10.6760718987 |
| NM_024121 | TMEM185B |      | 123  | 170           | 9.68008949888 |
| NM_024121 | TMEM185B |      | 1619 | 1685          | 9.68008949888 |
| NM_024121 | TMEM185B |      | 1842 | 1869          | 10.5959502895 |
| NM_024121 | TMEM185B |      | 2281 | 2350          | 9.67607189871 |
| NM_024121 | TMEM185B |      | 1722 | 1811          | 11.6800894989 |
| NM_024121 | TMEM185B |      | 673  | 1143          | 14.6800894989 |
| NM_024121 | TMEM185B |      | 452  | 631           | 12.2650519996 |
| NM_199077 | CNNM2    | 160  | 204  | 8.31607938858 |               |
| NM_134433 | RFX2     | 3149 | 3191 | 10.9600825281 |               |
| NM_130398 | EX01     | 723  | 782  | 7.96827141381 |               |
| NM_030783 | PTDSS2   | 592  | 628  | 5.6904969477  |               |
| NM_030783 | PTDSS2   | 373  | 440  | 8.01243177365 |               |
| NM_030783 | PTDSS2   | 1377 | 1440 | 7.27546594356 |               |
| NM_030783 | PTDSS2   | 545  | 592  | 7.27546594356 |               |
| NM_030783 | PTDSS2   | 774  | 869  | 6.69050367876 |               |
| NM_030783 | PTDSS2   | 1123 | 1182 | 5.68648607859 |               |
| NM_030782 | CLPTM1L  | 1687 | 1866 | 8.04861492637 |               |
| NM_030782 | CLPTM1L  | 378  | 467  | 3.9609783348  |               |
| NM_030782 | CLPTM1L  | 1109 | 1439 | 8.48471404118 |               |
| NM_030782 | CLPTM1L  | 491  | 839  | 7.96115208512 |               |
| NM_030782 | CLPTM1L  | 179  | 369  | 6.54611458584 |               |
| NM_030782 | CLPTM1L  | 1525 | 1622 | 5.96115208512 |               |
| NM_030782 | CLPTM1L  | 860  | 1106 | 8.6050082749  |               |
| NM_030782 | CLPTM1L  | 1949 | 2132 | 7.66159180326 |               |
| NM_030780 | SLC25A32 |      | 662  | 758           | 6.60411844367 |
| NM_017882 | CLN6     | 267  | 368  | 11.0152283726 |               |
| NM_017882 | CLN6     | 669  | 701  | 8.01121077244 |               |
| NM_017882 | CLN6     | 1173 | 1276 | 9.01522837261 |               |
| NM_017882 | CLN6     | 1663 | 1736 | 9.60019087311 |               |
| NM_017882 | CLN6     | 1282 | 1366 | 11.0152283726 |               |
| NM_017882 | CLN6     | 705  | 756  | 8.01522164156 |               |
| NM_017882 | CLN6     | 1063 | 1110 | 9.01121077244 |               |

|              |          |      |      |                   |
|--------------|----------|------|------|-------------------|
| NM_017882    | CLN6     | 847  | 1025 | 11.9221189682     |
| NM_017882    | CLN6     | 582  | 666  | 10.0152283726     |
| NM_017737    | FNBP1L   | 52   | 137  | 3.38611410444     |
| NM_017737    | FNBP1L   | 787  | 874  | 3.97107661249     |
| NM_017736    | THUMPD1  | 843  | 892  | 5.20149795732     |
| NM_017736    | THUMPD1  | 2339 | 2399 | 5.19748059307     |
| NM_017887    | C1orf123 |      | 114  | 164 6.57054123755 |
| NM_017730    | QRICH1   | 1297 | 1344 | 5.72065559854     |
| NM_017730    | QRICH1   | 1955 | 2029 | 7.30561809926     |
| NM_017730    | QRICH1   | 2264 | 2329 | 5.72066232937     |
| NM_017730    | QRICH1   | 1700 | 1741 | 5.63652312021     |
| NM_017730    | QRICH1   | 1769 | 1818 | 5.63652312021     |
| NM_017733    | PIGG     | 286  | 380  | 9.15637754        |
| NM_017733    | PIGG     | 1965 | 2019 | 9.15637753999     |
| NM_017733    | PIGG     | 164  | 221  | 8.74134004072     |
| NM_017733    | PIGG     | 2872 | 2964 | 9.96373246205     |
| NM_017733    | PIGG     | 1336 | 1408 | 9.15637753977     |
| NM_017733    | PIGG     | 510  | 583  | 9.15637754        |
| NM_017733    | PIGG     | 2146 | 2239 | 8.74134004072     |
| NM_017733    | PIGG     | 2541 | 2663 | 10.4783056349     |
| NM_017733    | PIGG     | 1057 | 1110 | 9.47830563488     |
| NM_017733    | PIGG     | 132  | 161  | 7.07223833061     |
| NM_017733    | PIGG     | 2093 | 2131 | 7.15235993982     |
| NM_017733    | PIGG     | 2975 | 3207 | 10.9637324621     |
| NM_017733    | PIGG     | 2379 | 2538 | 11.3263025414     |
| NM_017733    | PIGG     | 1110 | 1335 | 10.9637324621     |
| NM_017733    | PIGG     | 1473 | 1784 | 11.6158091586     |
| NM_017733    | PIGG     | 2669 | 2759 | 9.15637754        |
| NM_017733    | PIGG     | 2764 | 2860 | 9.15637754        |
| NM_017733    | PIGG     | 1831 | 1948 | 9.15637754        |
| NM_017733    | PIGG     | 824  | 958  | 9.15637754        |
| NM_001142416 | AIMP1    | 43   | 108  | 4.93353678092     |
| NM_001142416 | AIMP1    | 209  | 301  | 4.93353004987     |
| NM_001142416 | AIMP1    | 560  | 786  | 6.74089170298     |
| NM_001142416 | AIMP1    | 112  | 171  | 4.9335367807      |
| NM_001142416 | AIMP1    | 818  | 894  | 4.51832553132     |
| NM_001142416 | AIMP1    | 419  | 518  | 3.93353678092     |
| NM_003587    | DHX16    | 2127 | 2203 | 6.39788597235     |
| NM_003587    | DHX16    | 3335 | 3396 | 6.40189684147     |
| NM_003587    | DHX16    | 3117 | 3187 | 6.4017298222      |
| NM_003587    | DHX16    | 1792 | 1847 | 6.39788597235     |
| NM_003587    | DHX16    | 1898 | 1982 | 5.4017298222      |
| NM_003587    | DHX16    | 729  | 804  | 6.4017298222      |
| NM_004697    | PRPF4    | 1636 | 1720 | 5.30167731226     |
| NM_004697    | PRPF4    | 798  | 893  | 7.62361190228     |
| NM_001002860 | BTBD7    | 8289 | 8365 | 9.57054471519     |
| NM_001002860 | BTBD7    | 7688 | 7790 | 10.3075103094     |
| NM_001002860 | BTBD7    | 7905 | 7940 | 8.98156461429     |
| NM_001002860 | BTBD7    | 6623 | 6673 | 8.98156461429     |
| NM_001002860 | BTBD7    | 2133 | 2202 | 9.56652711501     |



|              |        |      |      |               |
|--------------|--------|------|------|---------------|
| NM_001146082 | MBOAT7 | 1275 | 1315 | 7.72230493984 |
| NM_001146082 | MBOAT7 | 269  | 377  | 10.8922301772 |
| NM_001146082 | MBOAT7 | 753  | 920  | 11.3072676765 |
| NM_001146082 | MBOAT7 | 1403 | 1538 | 10.8922301772 |
| NM_001146082 | MBOAT7 | 474  | 733  | 11.6291957714 |
| NM_001146082 | MBOAT7 | 967  | 1196 | 10.5296600978 |
| NM_001903    | CTNNA1 | 1527 | 1582 | 3.79288789256 |
| NM_001903    | CTNNA1 | 267  | 365  | 5.20792539184 |
| NM_001903    | CTNNA1 | 3098 | 3171 | 4.79288789256 |
| NM_001903    | CTNNA1 | 63   | 120  | 3.79271414224 |
| NM_001903    | CTNNA1 | 2155 | 2210 | 4.20792539183 |
| NM_001903    | CTNNA1 | 814  | 882  | 4.79288789255 |
| NM_001903    | CTNNA1 | 3393 | 3462 | 4.20792539184 |
| NM_001903    | CTNNA1 | 2360 | 2395 | 2.12378618246 |
| NM_001903    | CTNNA1 | 3221 | 3301 | 3.12378618246 |
| NM_001903    | CTNNA1 | 2733 | 2787 | 2.20792539184 |
| NM_001903    | CTNNA1 | 474  | 561  | 5.0152803139  |
| NM_001903    | CTNNA1 | 1970 | 2139 | 6.20792539184 |
| NM_001903    | CTNNA1 | 3490 | 3604 | 3.79288789256 |
| NM_001903    | CTNNA1 | 2226 | 2342 | 5.52985348673 |
| NM_001903    | CTNNA1 | 130  | 213  | 4.20792539184 |
| NM_001903    | CTNNA1 | 1596 | 1970 | 7.2523195112  |
| NM_001903    | CTNNA1 | 2843 | 2997 | 5.52985348673 |
| NM_001903    | CTNNA1 | 2397 | 2511 | 4.52985348673 |
| NM_001903    | CTNNA1 | 569  | 813  | 6.11481598745 |
| NM_001903    | CTNNA1 | 904  | 1524 | 7.56547739646 |
| NM_001903    | CTNNA1 | 2518 | 2664 | 4.20792539184 |
| NM_001903    | CTNNA1 | 367  | 473  | 5.37785039328 |
| NM_003584    | DUSP11 | 295  | 357  | 8.65989472413 |
| NM_003584    | DUSP11 | 511  | 552  | 7.15505383262 |
| NM_181313    | TAZ    | 792  | 828  | 7.43016298268 |
| NM_001135564 | HSF2   | 361  | 434  | 7.26280556073 |
| NM_016286    | DCXR   | 675  | 767  | 5.46036704406 |
| NM_016286    | DCXR   | 101  | 129  | 6.3762278349  |
| NM_016286    | DCXR   | 576  | 636  | 6.96119033562 |
| NM_016287    | HP1BP3 | 3562 | 3632 | 7.21648473534 |
| NM_016287    | HP1BP3 | 2511 | 2551 | 5.81041743107 |
| NM_016287    | HP1BP3 | 1337 | 1422 | 6.47951890525 |
| NM_016287    | HP1BP3 | 2840 | 2887 | 6.47951241012 |
| NM_016287    | HP1BP3 | 207  | 274  | 7.21648473534 |
| NM_016287    | HP1BP3 | 3696 | 3775 | 5.89455664045 |
| NM_016287    | HP1BP3 | 3292 | 3348 | 6.47951241012 |
| NM_016287    | HP1BP3 | 2003 | 2130 | 7.70191156251 |
| NM_016287    | HP1BP3 | 3844 | 3869 | 4.89053904028 |
| NM_016287    | HP1BP3 | 1194 | 1288 | 6.89455664045 |
| NM_016287    | HP1BP3 | 1425 | 1498 | 5.8945499094  |
| NM_016284    | CNOT1  | 6809 | 6929 | 7.13790645084 |
| NM_016284    | CNOT1  | 4504 | 4563 | 6.13790645062 |
| NM_016284    | CNOT1  | 5290 | 5366 | 5.72286222051 |
| NM_016284    | CNOT1  | 1755 | 1787 | 5.05376724146 |

|           |       |      |      |               |
|-----------|-------|------|------|---------------|
| NM_016284 | CNOT1 | 422  | 469  | 5.13790645062 |
| NM_016284 | CNOT1 | 7331 | 7374 | 6.13790645084 |
| NM_016284 | CNOT1 | 5934 | 6061 | 7.45983454573 |
| NM_016284 | CNOT1 | 528  | 580  | 5.72269520125 |
| NM_016284 | CNOT1 | 5639 | 5710 | 6.13790645084 |
| NM_016284 | CNOT1 | 331  | 368  | 5.13773270053 |
| NM_016284 | CNOT1 | 1432 | 1479 | 5.72286894402 |
| NM_016284 | CNOT1 | 3179 | 3242 | 6.13790645084 |
| NM_016284 | CNOT1 | 2071 | 2142 | 5.13790645084 |
| NM_016284 | CNOT1 | 3559 | 3629 | 5.13790645084 |
| NM_016284 | CNOT1 | 3355 | 3404 | 4.05376724146 |
| NM_016284 | CNOT1 | 483  | 527  | 6.13790645084 |
| NM_016284 | CNOT1 | 3962 | 4040 | 4.13790645062 |
| NM_016284 | CNOT1 | 2438 | 2496 | 5.72286894402 |
| NM_016284 | CNOT1 | 6107 | 6177 | 6.13790645084 |
| NM_016284 | CNOT1 | 5786 | 5851 | 6.72286895157 |
| NM_016284 | CNOT1 | 6427 | 6492 | 6.13790645084 |
| NM_016284 | CNOT1 | 4425 | 4495 | 4.13790645084 |
| NM_016284 | CNOT1 | 1201 | 1252 | 6.45983454573 |
| NM_016284 | CNOT1 | 6701 | 6740 | 5.13773270053 |
| NM_016284 | CNOT1 | 1802 | 1868 | 6.13790645084 |
| NM_016284 | CNOT1 | 689  | 757  | 5.72286895157 |
| NM_016284 | CNOT1 | 3652 | 3734 | 4.13790645062 |
| NM_016284 | CNOT1 | 6304 | 6359 | 6.45983454573 |
| NM_016284 | CNOT1 | 6662 | 6694 | 4.13388885067 |
| NM_016284 | CNOT1 | 2674 | 2730 | 6.13790645084 |
| NM_016284 | CNOT1 | 5147 | 5207 | 5.1379064433  |
| NM_016284 | CNOT1 | 5452 | 5494 | 5.72286222051 |
| NM_016284 | CNOT1 | 3065 | 3151 | 6.9452613729  |
| NM_016284 | CNOT1 | 2733 | 2840 | 5.13790645084 |
| NM_016284 | CNOT1 | 816  | 866  | 4.05376724146 |
| NM_016284 | CNOT1 | 6519 | 6602 | 5.72286895157 |
| NM_016284 | CNOT1 | 6984 | 7031 | 5.05376724146 |
| NM_016284 | CNOT1 | 587  | 639  | 6.45983454551 |
| NM_016284 | CNOT1 | 1999 | 2053 | 5.13388885067 |
| NM_016284 | CNOT1 | 2164 | 2316 | 6.9452613729  |
| NM_016284 | CNOT1 | 1258 | 1431 | 6.45983454573 |
| NM_016284 | CNOT1 | 1496 | 1555 | 5.72286871565 |
| NM_016284 | CNOT1 | 912  | 1007 | 5.72286895157 |
| NM_016284 | CNOT1 | 7642 | 7760 | 6.72286895157 |
| NM_016284 | CNOT1 | 4564 | 4653 | 4.1379064433  |
| NM_016284 | CNOT1 | 4947 | 5075 | 6.13790645084 |
| NM_016284 | CNOT1 | 1057 | 1159 | 6.13790645084 |
| NM_016284 | CNOT1 | 4780 | 4902 | 6.45983454573 |
| NM_016284 | CNOT1 | 5549 | 5626 | 4.13790645084 |
| NM_016284 | CNOT1 | 2912 | 3025 | 6.9452613729  |
| NM_016284 | CNOT1 | 7070 | 7213 | 6.9452613729  |
| NM_016284 | CNOT1 | 1564 | 1738 | 7.30783145229 |
| NM_016284 | CNOT1 | 4102 | 4339 | 6.45983454573 |
| NM_016284 | CNOT1 | 7456 | 7566 | 5.72286895157 |

|              |         |      |      |               |
|--------------|---------|------|------|---------------|
| NM_016284    | CNOT1   | 3765 | 3907 | 7.13790645084 |
| NM_016937    | POLA1   | 2070 | 2144 | 7.01602324844 |
| NM_016937    | POLA1   | 1927 | 1968 | 7.01602324844 |
| NM_016937    | POLA1   | 4205 | 4244 | 7.01602324844 |
| NM_016937    | POLA1   | 1329 | 1370 | 7.01602324844 |
| NM_016937    | POLA1   | 3982 | 4112 | 7.02004084106 |
| NM_016283    | TAF9    | 324  | 358  | 4.20634413943 |
| NM_016283    | TAF9    | 255  | 313  | 3.53741617964 |
| NM_016283    | TAF9    | 90   | 204  | 4.20651788975 |
| NM_016283    | TAF9    | 578  | 677  | 3.62155515311 |
| NM_016283    | TAF9    | 773  | 880  | 3.62155515311 |
| NM_016281    | TAOK3   | 4013 | 4076 | 5.12634575228 |
| NM_173685    | NSMCE2  | 316  | 429  | 5.6778185967  |
| NM_004368    | CNN2    | 1596 | 1676 | 3.94890965918 |
| NM_004368    | CNN2    | 381  | 497  | 6.53387215991 |
| NM_004368    | CNN2    | 1808 | 1865 | 5.53387215991 |
| NM_004368    | CNN2    | 1456 | 1521 | 5.53369840959 |
| NM_004368    | CNN2    | 898  | 1004 | 5.94890965919 |
| NM_004368    | CNN2    | 759  | 878  | 6.94890965919 |
| NM_004368    | CNN2    | 2357 | 2446 | 5.53387215991 |
| NM_004368    | CNN2    | 1696 | 1775 | 3.94489205901 |
| NM_004368    | CNN2    | 1226 | 1437 | 7.27083775407 |
| NM_004368    | CNN2    | 2081 | 2212 | 5.94890965919 |
| NM_004368    | CNN2    | 1865 | 2030 | 6.53387215991 |
| NM_004368    | CNN2    | 498  | 716  | 8.03637250044 |
| NM_001201428 | GORASP2 | 680  | 746  | 6.13688621783 |
| NM_001201428 | GORASP2 | 2036 | 2062 | 5.55175669784 |
| NM_001201428 | GORASP2 | 1729 | 1795 | 6.55193044816 |
| NM_001201428 | GORASP2 | 269  | 329  | 5.55193044816 |
| NM_001201428 | GORASP2 | 1150 | 1195 | 5.55193044061 |
| NM_001201428 | GORASP2 | 463  | 504  | 6.87368479273 |
| NM_001201428 | GORASP2 | 1051 | 1108 | 6.13689271296 |
| NM_001201428 | GORASP2 | 344  | 424  | 7.55193044816 |
| NM_001201428 | GORASP2 | 126  | 267  | 8.0113620668  |
| NM_001201428 | GORASP2 | 777  | 881  | 6.13689294888 |
| NM_001201428 | GORASP2 | 1933 | 2032 | 5.55193044794 |
| NM_001201428 | GORASP2 | 1372 | 1593 | 8.13689294888 |
| NM_001201428 | GORASP2 | 897  | 1010 | 6.55193044816 |
| NM_001201428 | GORASP2 | 517  | 667  | 7.55193044816 |
| NM_004362    | CLGN    | 1236 | 1307 | 6.90481049497 |
| NM_004362    | CLGN    | 2032 | 2096 | 4.09343797273 |
| NM_004362    | CLGN    | 1520 | 1581 | 6.09745557269 |
| NM_004362    | CLGN    | 44   | 127  | 6.68241807363 |
| NM_004362    | CLGN    | 1315 | 1505 | 9.18491841416 |
| NM_004362    | CLGN    | 756  | 900  | 8.00434616852 |
| NM_004362    | CLGN    | 134  | 268  | 8.41938366779 |
| NM_004362    | CLGN    | 516  | 755  | 9.00434616852 |
| NM_004362    | CLGN    | 1650 | 1698 | 4.09744884185 |
| NM_004362    | CLGN    | 1598 | 1646 | 4.09728182259 |
| NM_004362    | CLGN    | 437  | 494  | 6.09728182259 |

|           |         |      |      |               |
|-----------|---------|------|------|---------------|
| NM_004362 | CLGN    | 1773 | 2027 | 6.68241807363 |
| NM_004362 | CLGN    | 273  | 432  | 6.68241807363 |
| NM_004362 | CLGN    | 922  | 1230 | 9.09745557291 |
| NM_004362 | CLGN    | 2096 | 2287 | 7.26738057435 |
| NM_004363 | CEACAM5 | 178  | 229  | 10.5572985432 |
| NM_004363 | CEACAM5 | 589  | 656  | 12.1422612799 |
| NM_004363 | CEACAM5 | 494  | 522  | 11.5571250288 |
| NM_004360 | CDH1    | 3173 | 3247 | 8.55754526838 |
| NM_004360 | CDH1    | 122  | 207  | 6.75019034632 |
| NM_004360 | CDH1    | 739  | 811  | 8.55754526838 |
| NM_004360 | CDH1    | 1192 | 1259 | 7.75019034632 |
| NM_004360 | CDH1    | 681  | 737  | 8.07211844121 |
| NM_004360 | CDH1    | 3251 | 3294 | 5.75019034632 |
| NM_004360 | CDH1    | 255  | 342  | 8.07211844121 |
| NM_004360 | CDH1    | 370  | 481  | 8.55754526838 |
| NM_004360 | CDH1    | 3127 | 3170 | 6.75019033877 |
| NM_004360 | CDH1    | 4642 | 4770 | 8.92011534776 |
| NM_004360 | CDH1    | 3592 | 3658 | 7.75019034632 |
| NM_004360 | CDH1    | 1481 | 1516 | 7.7501901104  |
| NM_004360 | CDH1    | 1845 | 1942 | 9.45063006446 |
| NM_004360 | CDH1    | 1262 | 1386 | 8.75019034632 |
| NM_004360 | CDH1    | 1386 | 1461 | 8.07211844121 |
| NM_004360 | CDH1    | 3877 | 3970 | 7.75019034632 |
| NM_004360 | CDH1    | 2520 | 2789 | 10.4506300645 |
| NM_004360 | CDH1    | 834  | 1175 | 10.5050778485 |
| NM_004360 | CDH1    | 1535 | 1839 | 10.5050778485 |
| NM_004360 | CDH1    | 595  | 652  | 5.75019034632 |
| NM_004360 | CDH1    | 2106 | 2510 | 11.0355925652 |
| NM_004360 | CDH1    | 489  | 588  | 5.750016596   |
| NM_004360 | CDH1    | 3984 | 4143 | 8.75019034632 |
| NM_004360 | CDH1    | 1957 | 2073 | 7.75019034632 |
| NM_004360 | CDH1    | 3790 | 3876 | 8.75019034632 |
| NM_004360 | CDH1    | 4470 | 4540 | 5.75018361527 |
| NM_004360 | CDH1    | 2847 | 2992 | 7.75019034632 |
| NM_004366 | CLCN2   | 295  | 380  | 9.74231267619 |
| NM_004366 | CLCN2   | 2439 | 2521 | 9.74231940724 |
| NM_004366 | CLCN2   | 1486 | 1517 | 8.73830180707 |
| NM_004366 | CLCN2   | 1601 | 1696 | 10.3271081576 |
| NM_004366 | CLCN2   | 1249 | 1368 | 9.74231940724 |
| NM_004367 | CCR6    | 719  | 795  | 10.2052811051 |
| NM_004367 | CCR6    | 871  | 991  | 10.4276735264 |
| NM_004367 | CCR6    | 359  | 440  | 9.94224669922 |
| NM_004367 | CCR6    | 444  | 518  | 10.6203186043 |
| NM_004367 | CCR6    | 995  | 1064 | 9.62031860433 |
| NM_004367 | CCR6    | 2453 | 2520 | 9.62031860433 |
| NM_004367 | CCR6    | 1622 | 1680 | 8.62031860433 |
| NM_004367 | CCR6    | 2578 | 2634 | 8.62031836841 |
| NM_004367 | CCR6    | 2227 | 2273 | 7.61630100416 |
| NM_004367 | CCR6    | 2117 | 2206 | 8.62031859678 |
| NM_004367 | CCR6    | 533  | 641  | 9.20528110505 |

|              |         |      |      |               |
|--------------|---------|------|------|---------------|
| NM_004367    | CCR6    | 1069 | 1324 | 11.9422466992 |
| NM_004367    | CCR6    | 1339 | 1468 | 9.62031860433 |
| NM_004364    | CEBPA   | 2514 | 2586 | 6.78548343755 |
| NM_004364    | CEBPA   | 1456 | 1536 | 7.52244903172 |
| NM_004364    | CEBPA   | 2218 | 2253 | 5.20052092928 |
| NM_004364    | CEBPA   | 1059 | 1143 | 6.20052093683 |
| NM_004364    | CEBPA   | 2034 | 2087 | 6.78548343755 |
| NM_004364    | CEBPA   | 956  | 1015 | 5.20052092928 |
| NM_004364    | CEBPA   | 1949 | 2027 | 7.20052070091 |
| NM_004364    | CEBPA   | 1728 | 1774 | 5.19650333666 |
| NM_004364    | CEBPA   | 2254 | 2357 | 8.00787585889 |
| NM_004364    | CEBPA   | 2120 | 2199 | 6.19650333666 |
| NM_004364    | CEBPA   | 1323 | 1417 | 5.20052093683 |
| NM_173179    | SLC35C2 | 1293 | 1358 | 8.62504110257 |
| NM_173179    | SLC35C2 | 636  | 687  | 7.03606100167 |
| NM_173179    | SLC35C2 | 760  | 980  | 8.36200669673 |
| NM_173179    | SLC35C2 | 1093 | 1253 | 9.04007860185 |
| NM_173179    | SLC35C2 | 348  | 463  | 8.04007860185 |
| NM_173179    | SLC35C2 | 1954 | 2025 | 7.62504110235 |
| NM_001131017 | CIZ1    | 667  | 769  | 6.37528006654 |
| NM_001131017 | CIZ1    | 2221 | 2256 | 4.78629996587 |
| NM_001131017 | CIZ1    | 352  | 469  | 6.37528006676 |
| NM_001131017 | CIZ1    | 2715 | 2813 | 6.37528006654 |
| NM_001013438 | FXR1    | 618  | 670  | 2.11836142473 |
| NM_001013438 | FXR1    | 996  | 1117 | 3.11853517505 |
| NM_001013438 | FXR1    | 1625 | 1855 | 4.9258900971  |
| NM_001013438 | FXR1    | 2525 | 2613 | 3.11853517482 |
| NM_001013438 | FXR1    | 1244 | 1378 | 4.11853517505 |
| NM_001013438 | FXR1    | 1422 | 1545 | 4.70349767577 |
| NM_001013436 | MPST    | 393  | 428  | 3.04748981447 |
| NM_001013436 | MPST    | 1092 | 1139 | 4.71659151702 |
| NM_001013436 | MPST    | 766  | 822  | 4.63245231519 |
| NM_001013436 | MPST    | 539  | 606  | 3.04748981447 |
| NM_201647    | STAMPB  | 152  | 251  | 5.40610954111 |
| NM_025138    | PROSER1 | 4252 | 4298 | 7.62653791549 |
| NM_025138    | PROSER1 | 2267 | 2391 | 10.6267116658 |
| NM_025138    | PROSER1 | 2189 | 2266 | 9.21166743547 |
| NM_025138    | PROSER1 | 3384 | 3439 | 8.54257245642 |
| NM_025138    | PROSER1 | 4517 | 4605 | 7.62653791549 |
| NM_025138    | PROSER1 | 2634 | 2681 | 7.54257245642 |
| NM_025138    | PROSER1 | 3112 | 3184 | 9.6267116658  |
| NM_001199302 | CNOT2   | 406  | 470  | 5.17544559685 |
| NM_001199302 | CNOT2   | 1641 | 1711 | 7.17544559664 |
| NM_001199302 | CNOT2   | 1945 | 1992 | 5.17543886581 |
| NM_001199302 | CNOT2   | 2117 | 2200 | 5.17142799669 |
| NM_000263    | NAGLU   | 1660 | 1742 | 8.33330599622 |
| NM_000263    | NAGLU   | 2352 | 2413 | 7.74432589533 |
| NM_000263    | NAGLU   | 589  | 665  | 7.7483434955  |
| NM_000263    | NAGLU   | 1574 | 1627 | 6.74432589533 |
| NM_000263    | NAGLU   | 2120 | 2169 | 8.3333057603  |

|           |         |      |      |               |
|-----------|---------|------|------|---------------|
| NM_000263 | NAGLU   | 1471 | 1500 | 6.66420428612 |
| NM_000263 | NAGLU   | 1924 | 2068 | 10.2077751141 |
| NM_000263 | NAGLU   | 1512 | 1564 | 6.74816974518 |
| NM_000263 | NAGLU   | 1004 | 1073 | 8.33330599622 |
| NM_000263 | NAGLU   | 753  | 849  | 8.33330599622 |
| NM_000263 | NAGLU   | 479  | 523  | 7.66420428612 |
| NM_000263 | NAGLU   | 1348 | 1460 | 9.55569841756 |
| NM_000263 | NAGLU   | 892  | 999  | 8.333305996   |
| NM_000263 | NAGLU   | 1080 | 1274 | 9.91826849694 |
| NM_181787 | DPY19L4 | 2046 | 2098 | 8.20344861517 |
| NM_181787 | DPY19L4 | 1161 | 1213 | 9.79242871606 |
| NM_181787 | DPY19L4 | 1079 | 1156 | 8.20745948429 |
| NM_181787 | DPY19L4 | 268  | 335  | 7.12332700596 |
| NM_181787 | DPY19L4 | 3863 | 3911 | 7.20745948429 |
| NM_181787 | DPY19L4 | 2388 | 2467 | 8.20746621533 |
| NM_181787 | DPY19L4 | 1763 | 1844 | 9.20746621534 |
| NM_181787 | DPY19L4 | 1432 | 1518 | 9.52939431023 |
| NM_181787 | DPY19L4 | 459  | 519  | 7.20746620779 |
| NM_181787 | DPY19L4 | 608  | 794  | 10.2074662153 |
| NM_181787 | DPY19L4 | 1541 | 1749 | 11.1143568109 |
| NM_181787 | DPY19L4 | 521  | 590  | 8.78841111589 |
| NM_181787 | DPY19L4 | 1254 | 1343 | 8.20746621534 |
| NM_144570 | HN1L    | 1088 | 1155 | 5.36868976178 |
| NM_144570 | HN1L    | 973  | 1088 | 5.36868976178 |
| NM_144570 | HN1L    | 3349 | 3402 | 4.36467216161 |
| NM_144570 | HN1L    | 3204 | 3244 | 3.36851601147 |
| NM_144570 | HN1L    | 2405 | 2478 | 5.36868976179 |
| NM_144570 | HN1L    | 1621 | 1711 | 5.69061785667 |
| NM_144570 | HN1L    | 2206 | 2274 | 5.36868976179 |
| NM_144570 | HN1L    | 1482 | 1614 | 6.53861476323 |
| NM_144570 | HN1L    | 171  | 355  | 6.36868976179 |
| NM_144570 | HN1L    | 361  | 451  | 4.95365226251 |
| NM_144570 | HN1L    | 1816 | 1874 | 4.95365225496 |
| NM_144570 | HN1L    | 2722 | 2880 | 6.53861476323 |
| NM_144570 | HN1L    | 1172 | 1426 | 7.36868976179 |
| NM_144570 | HN1L    | 2893 | 3018 | 5.36868976179 |
| NM_144570 | HN1L    | 2539 | 2649 | 3.36868976178 |
| NM_144572 | TBC1D2B | 3641 | 3707 | 7.45438606913 |
| NM_144572 | TBC1D2B | 3185 | 3242 | 7.45438606913 |
| NM_181783 | TMTC3   | 2228 | 2304 | 9.44941791237 |
| NM_181783 | TMTC3   | 1009 | 1060 | 8.86445541142 |
| NM_181783 | TMTC3   | 3717 | 3801 | 7.86445541165 |
| NM_181783 | TMTC3   | 4984 | 5036 | 8.86428166133 |
| NM_181783 | TMTC3   | 80   | 159  | 9.44941791237 |
| NM_181783 | TMTC3   | 5602 | 5638 | 7.86043781147 |
| NM_181783 | TMTC3   | 860  | 957  | 10.4494179124 |
| NM_181783 | TMTC3   | 4329 | 4383 | 8.86444868059 |
| NM_181783 | TMTC3   | 4603 | 4669 | 7.86445541165 |
| NM_181783 | TMTC3   | 5111 | 5151 | 9.44924416205 |
| NM_181783 | TMTC3   | 1802 | 1882 | 9.86445541165 |

|           |          |       |       |               |               |
|-----------|----------|-------|-------|---------------|---------------|
| NM_181783 | TMTC3    | 1546  | 1633  | 10.4494179124 |               |
| NM_181783 | TMTC3    | 1088  | 1185  | 9.44941791237 |               |
| NM_181783 | TMTC3    | 1659  | 1756  | 10.1863835065 |               |
| NM_181783 | TMTC3    | 4739  | 4850  | 10.1863835065 |               |
| NM_181783 | TMTC3    | 3130  | 3261  | 8.86445541165 |               |
| NM_181783 | TMTC3    | 536   | 853   | 11.9519182529 |               |
| NM_181783 | TMTC3    | 1934  | 2143  | 11.0343804131 |               |
| NM_181783 | TMTC3    | 2428  | 2539  | 7.86445541164 |               |
| NM_181783 | TMTC3    | 2878  | 3040  | 9.86445541165 |               |
| NM_181783 | TMTC3    | 3807  | 3920  | 9.44941791215 |               |
| NM_181783 | TMTC3    | 1187  | 1295  | 9.86445541165 |               |
| NM_181783 | TMTC3    | 1296  | 1404  | 11.1863835065 |               |
| NM_181783 | TMTC3    | 3311  | 3456  | 9.44941791237 |               |
| NM_000269 | NME1     | 35    | 73    | 1.87124824814 |               |
| NM_000269 | NME1     | 81    | 186   | 3.95538745752 |               |
| NM_000269 | NME1     | 187   | 377   | 6.41481907616 |               |
| NM_000269 | NME1     | 388   | 719   | 6.86227805313 |               |
| NM_000268 | NF2      | 1158  | 1215  | 6.78497824349 |               |
| NM_000268 | NF2      | 3514  | 3593  | 6.78498496699 |               |
| NM_000268 | NF2      | 2387  | 2421  | 7.78481122422 |               |
| NM_000268 | NF2      | 1023  | 1121  | 9.10691306943 |               |
| NM_000268 | NF2      | 613   | 690   | 7.78498497454 |               |
| NM_000268 | NF2      | 500   | 613   | 8.36994747526 |               |
| NM_133378 | TTN      | 74535 | 74572 | 13.5425449675 |               |
| NM_144579 | SFXN5    | 3160  | 3215  | 7.10675180417 |               |
| NM_006633 | IQGAP2   | 1634  | 1706  | 4.64019973551 |               |
| NM_006633 | IQGAP2   | 3783  | 3832  | 5.37716532945 |               |
| NM_006633 | IQGAP2   | 1774  | 1854  | 4.05523050374 |               |
| NM_006633 | IQGAP2   | 4504  | 4570  | 3.05121963462 |               |
| NM_006633 | IQGAP2   | 3452  | 3560  | 5.05523723479 |               |
| NM_006633 | IQGAP2   | 2778  | 2864  | 3.05121963462 |               |
| NM_006633 | IQGAP2   | 1313  | 1443  | 5.64019973551 |               |
| NM_006633 | IQGAP2   | 4962  | 5024  | 3.05121963462 |               |
| NM_006633 | IQGAP2   | 5273  | 5342  | 3.05523699887 |               |
| NM_006636 | MTHFD2   | 285   | 338   | 4.70823245568 |               |
| NM_006636 | MTHFD2   | 1975  | 2033  | 2.38228676816 |               |
| NM_006636 | MTHFD2   | 654   | 683   | 2.30216515895 |               |
| NM_006636 | MTHFD2   | 1795  | 1858  | 3.97109311874 |               |
| NM_006636 | MTHFD2   | 386   | 471   | 4.70823246323 |               |
| NM_006636 | MTHFD2   | 1628  | 1668  | 3.88712765967 |               |
| NM_006636 | MTHFD2   | 1061  | 1205  | 4.38630436834 |               |
| NM_006636 | MTHFD2   | 73    | 129   | 3.38228676816 |               |
| NM_006636 | MTHFD2   | 496   | 608   | 4.97126686906 |               |
| NM_006636 | MTHFD2   | 159   | 271   | 4.38630436834 |               |
| NM_006636 | MTHFD2   | 814   | 1002  | 5.1936592904  |               |
| NM_006141 | DYNC1LI2 |       | 404   | 506           | 7.4150197914  |
| NM_006141 | DYNC1LI2 |       | 1400  | 1470          | 5.60766486179 |
| NM_006141 | DYNC1LI2 |       | 247   | 301           | 4.52352565996 |
| NM_006141 | DYNC1LI2 |       | 2571  | 2657          | 6.19262737006 |
| NM_006141 | DYNC1LI2 |       | 1171  | 1209          | 4.60749111902 |

|           |          |      |      |               |               |
|-----------|----------|------|------|---------------|---------------|
| NM_006141 | DYNC1LI2 |      | 307  | 376           | 6.19262737006 |
| NM_006141 | DYNC1LI2 |      | 2308 | 2368          | 5.60749111902 |
| NM_006141 | DYNC1LI2 |      | 2486 | 2524          | 4.52352565996 |
| NM_006141 | DYNC1LI2 |      | 1546 | 1604          | 4.60749111902 |
| NM_006141 | DYNC1LI2 |      | 1018 | 1115          | 6.19262737006 |
| NM_006141 | DYNC1LI2 |      | 3030 | 3094          | 6.19245361975 |
| NM_006141 | DYNC1LI2 |      | 4021 | 4061          | 4.60766486934 |
| NM_006141 | DYNC1LI2 |      | 3216 | 3300          | 5.60766486934 |
| NM_006141 | DYNC1LI2 |      | 4064 | 4301          | 8.06709648798 |
| NM_006141 | DYNC1LI2 |      | 2385 | 2462          | 4.60766486934 |
| NM_003463 | PTP4A1   | 2261 | 2316 | 3.66713001792 |               |
| NM_003463 | PTP4A1   | 1127 | 1216 | 4.15255684509 |               |
| NM_003463 | PTP4A1   | 1301 | 1330 | 2.92614682358 |               |
| NM_003463 | PTP4A1   | 4632 | 4688 | 1.34519519198 |               |
| NM_003463 | PTP4A1   | 1503 | 1601 | 4.51512692447 |               |
| NM_003463 | PTP4A1   | 2059 | 2114 | 2.34520192303 |               |
| NM_003463 | PTP4A1   | 4827 | 4870 | 1.34520191548 |               |
| NM_003463 | PTP4A1   | 1346 | 1503 | 5.04564164117 |               |
| NM_003463 | PTP4A1   | 1940 | 1986 | 2.34118432286 |               |
| NM_003463 | PTP4A1   | 3663 | 3744 | 1.34519519198 |               |
| NM_003463 | PTP4A1   | 4180 | 4268 | 2.34520192303 |               |
| NM_003463 | PTP4A1   | 3544 | 3606 | 3.34520168711 |               |
| NM_003463 | PTP4A1   | 3843 | 3896 | 2.34520191548 |               |
| NM_003463 | PTP4A1   | 2947 | 3015 | 2.93016442353 |               |
| NM_003463 | PTP4A1   | 1790 | 1888 | 3.66713001792 |               |
| NM_003463 | PTP4A1   | 2464 | 2593 | 4.93016442375 |               |
| NM_003463 | PTP4A1   | 622  | 1104 | 7.12656163656 |               |
| NM_003463 | PTP4A1   | 1239 | 1299 | 3.34520192303 |               |
| NM_003463 | PTP4A1   | 3144 | 3305 | 5.04564164117 |               |
| NM_003463 | PTP4A1   | 1602 | 1779 | 4.80463354167 |               |
| NM_003463 | PTP4A1   | 2723 | 2941 | 5.04564164117 |               |
| NM_003463 | PTP4A1   | 533  | 622  | 2.34520192303 |               |
| NM_153741 | DPM3     | 224  | 261  | 9.89359750589 |               |
| NM_153741 | DPM3     | 38   | 77   | 8.89760837501 |               |
| NM_007041 | ATE1     | 452  | 538  | 6.40044099398 |               |
| NM_007041 | ATE1     | 1179 | 1270 | 7.40044772481 |               |
| NM_006148 | LASP1    | 2367 | 2437 | 2.54347383548 |               |
| NM_006148 | LASP1    | 1375 | 1457 | 4.5434738357  |               |
| NM_006148 | LASP1    | 2487 | 2513 | 2.53945623553 |               |
| NM_006148 | LASP1    | 2907 | 3007 | 3.5434738357  |               |
| NM_006148 | LASP1    | 3423 | 3504 | 5.35082875776 |               |
| NM_006148 | LASP1    | 2733 | 2827 | 6.12843633642 |               |
| NM_006148 | LASP1    | 1544 | 1586 | 3.54347382815 |               |
| NM_006148 | LASP1    | 636  | 703  | 3.5434738357  |               |
| NM_006148 | LASP1    | 533  | 582  | 2.45933462632 |               |
| NM_006148 | LASP1    | 1838 | 1888 | 2.53945623553 |               |
| NM_006148 | LASP1    | 1462 | 1509 | 2.45933462632 |               |
| NM_006148 | LASP1    | 1090 | 1140 | 4.12843633641 |               |
| NM_006148 | LASP1    | 3010 | 3059 | 3.53945623553 |               |
| NM_006148 | LASP1    | 943  | 1090 | 5.35082875776 |               |



|              |         |      |      |               |
|--------------|---------|------|------|---------------|
| NM_006148    | LASP1   | 242  | 505  | 5.86540193059 |
| NM_006148    | LASP1   | 2097 | 2121 | 2.53945623553 |
| NM_006148    | LASP1   | 3562 | 3667 | 4.5434738357  |
| NM_006148    | LASP1   | 3678 | 4099 | 8.21589917767 |
| NM_006148    | LASP1   | 3070 | 3230 | 5.71339883714 |
| NM_006148    | LASP1   | 1728 | 1814 | 3.5434738357  |
| NM_006148    | LASP1   | 1155 | 1371 | 7.06703579176 |
| NM_006148    | LASP1   | 2148 | 2354 | 5.86540193059 |
| NM_001171202 | UBAP1   | 1503 | 1563 | 4.71441949162 |
| NM_001171202 | UBAP1   | 199  | 246  | 5.63028028224 |
| NM_001171202 | UBAP1   | 613  | 698  | 5.71040189145 |
| NM_001171202 | UBAP1   | 2112 | 2168 | 6.29938175642 |
| NM_001171202 | UBAP1   | 901  | 949  | 4.63028028224 |
| NM_001171202 | UBAP1   | 2250 | 2303 | 6.21524278296 |
| NM_001171202 | UBAP1   | 1001 | 1041 | 4.63028028224 |
| NM_001171202 | UBAP1   | 1375 | 1416 | 4.63028028224 |
| NM_001171202 | UBAP1   | 1067 | 1183 | 6.71441949162 |
| NM_025079    | ZC3H12A | 2185 | 2243 | 11.798097651  |
| NM_025079    | ZC3H12A | 2052 | 2122 | 11.7981043818 |
| NM_025079    | ZC3H12A | 1647 | 1729 | 10.2131418811 |
| NM_025079    | ZC3H12A | 280  | 367  | 11.798097651  |
| NM_025079    | ZC3H12A | 1818 | 1875 | 10.212968131  |
| NM_025079    | ZC3H12A | 1134 | 1188 | 10.129002672  |
| NM_025079    | ZC3H12A | 1403 | 1485 | 11.2131418811 |
| NM_025079    | ZC3H12A | 1561 | 1617 | 10.2091242812 |
| NM_025076    | UXS1    | 1604 | 1693 | 4.88147964265 |
| NM_025076    | UXS1    | 1253 | 1309 | 2.87746204248 |
| NM_025076    | UXS1    | 832  | 934  | 3.88147964265 |
| NM_025076    | UXS1    | 700  | 798  | 3.46644214337 |
| NM_025076    | UXS1    | 1749 | 1868 | 3.46644214337 |
| NM_025076    | UXS1    | 1325 | 1543 | 5.34091126129 |
| NM_025076    | UXS1    | 333  | 537  | 5.05140464409 |
| NM_025076    | UXS1    | 995  | 1176 | 4.88147964265 |
| NM_025075    | THOC7   | 191  | 276  | 4.534250938   |
| NM_025073    | SIKE1   | 492  | 540  | 7.66085463362 |
| NM_025073    | SIKE1   | 5326 | 5382 | 7.66469848347 |
| NM_025073    | SIKE1   | 5162 | 5248 | 7.07990973306 |
| NM_025072    | PTGES2  | 1739 | 1772 | 8.02736551767 |
| NM_025072    | PTGES2  | 2142 | 2209 | 7.61232152325 |
| NM_025072    | PTGES2  | 1335 | 1396 | 6.02736551767 |
| NM_025072    | PTGES2  | 1054 | 1176 | 8.02736575359 |
| NM_025072    | PTGES2  | 1634 | 1729 | 7.02736574604 |
| NM_001024938 | SLC2A11 | 477  | 521  | 10.1425220349 |
| NM_025215    | PUS1    | 1870 | 1928 | 7.8509920162  |
| NM_025215    | PUS1    | 945  | 1014 | 7.26603601061 |
| NM_025215    | PUS1    | 1022 | 1070 | 6.26201864636 |
| NM_025215    | PUS1    | 1291 | 1328 | 6.18189703715 |
| NM_025215    | PUS1    | 761  | 848  | 7.85099851133 |
| NM_001199163 | PSMC5   | 1419 | 1479 | 4.67086301617 |
| NM_001199163 | PSMC5   | 283  | 374  | 5.25582552444 |

|              |         |      |      |               |
|--------------|---------|------|------|---------------|
| NM_001199163 | PSMC5   | 464  | 544  | 5.25582552444 |
| NM_001199163 | PSMC5   | 1340 | 1416 | 3.67086302371 |
| NM_001199163 | PSMC5   | 1062 | 1332 | 7.0631804465  |
| NM_001199163 | PSMC5   | 642  | 882  | 6.57775361933 |
| NM_001199163 | PSMC5   | 544  | 640  | 5.47821794578 |
| NM_001199163 | PSMC5   | 892  | 1009 | 3.67086302372 |
| NM_001199163 | PSMC5   | 410  | 459  | 2.6706892734  |
| NM_001199162 | USP19   | 2125 | 2183 | 7.213512472   |
| NM_001199162 | USP19   | 2831 | 2878 | 7.71433577089 |
| NM_001199162 | USP19   | 1868 | 1926 | 6.12937327016 |
| NM_001199162 | USP19   | 2984 | 3057 | 6.2135057485  |
| NM_001199162 | USP19   | 3917 | 4033 | 7.21351247955 |
| NM_001199162 | USP19   | 2756 | 2821 | 6.2135057485  |
| NM_016426    | GTSE1   | 2112 | 2199 | 9.391867645   |
| NM_016426    | GTSE1   | 1692 | 1754 | 8.80689841323 |
| NM_016426    | GTSE1   | 2757 | 2827 | 8.80690513673 |
| NM_016426    | GTSE1   | 345  | 467  | 9.80690514428 |
| NM_016426    | GTSE1   | 2203 | 2308 | 8.80690514428 |
| NM_016426    | GTSE1   | 2930 | 2989 | 8.80673139397 |
| NM_016426    | GTSE1   | 1480 | 1576 | 10.8069051443 |
| NM_016426    | GTSE1   | 1900 | 2004 | 10.391867645  |
| NM_016426    | GTSE1   | 180  | 338  | 10.1288332392 |
| NM_001171166 | CAMTA2  | 1151 | 1186 | 7.67873905756 |
| NM_001171166 | CAMTA2  | 2207 | 2291 | 9.2677191509  |
| NM_001080467 | MY05B   | 1701 | 1751 | 6.1544868015  |
| NM_001080467 | MY05B   | 368  | 418  | 6.1544868015  |
| NM_001080469 | FBX046  | 2901 | 2962 | 10.3382104585 |
| NM_001001    | RPL36AL | 156  | 209  | 3.84762138705 |
| NM_001001    | RPL36AL | 416  | 489  | 2.26265888633 |
| NM_001001    | RPL36AL | 233  | 399  | 5.07001380839 |
| NM_001085471 | FOXN3   | 6025 | 6084 | 4.70426710527 |
| NM_001085471 | FOXN3   | 7492 | 7555 | 5.70828446953 |
| NM_001085471 | FOXN3   | 3196 | 3231 | 6.20910799678 |
| NM_001085471 | FOXN3   | 6634 | 6691 | 5.70811095513 |
| NM_001085471 | FOXN3   | 497  | 543  | 4.62414549606 |
| NM_001085471 | FOXN3   | 4373 | 4453 | 6.29324719862 |
| NM_001085471 | FOXN3   | 6478 | 6542 | 4.70426710527 |
| NM_001085471 | FOXN3   | 3238 | 3372 | 7.03021280033 |
| NM_001085471 | FOXN3   | 289  | 386  | 4.70827797439 |
| NM_023928    | AACS    | 2864 | 2904 | 5.21709624841 |
| NM_023928    | AACS    | 370  | 450  | 6.88619122746 |
| NM_023928    | AACS    | 2552 | 2626 | 5.30106170748 |
| NM_023928    | AACS    | 1259 | 1321 | 6.88218035834 |
| NM_001098205 | HNRNPF  | 435  | 535  | 4.70341423046 |
| NM_001098205 | HNRNPF  | 725  | 815  | 4.70341423046 |
| NM_001098205 | HNRNPF  | 2237 | 2313 | 1.53348922902 |
| NM_001098205 | HNRNPF  | 1457 | 1514 | 3.53348922902 |
| NM_001098205 | HNRNPF  | 1873 | 1903 | 1.52947162885 |
| NM_001098205 | HNRNPF  | 1160 | 1252 | 4.70341423046 |
| NM_001098205 | HNRNPF  | 1377 | 1452 | 3.11845172974 |

|              |          |      |      |                    |
|--------------|----------|------|------|--------------------|
| NM_001098205 | HNRNPF   | 2073 | 2213 | 5.23392894716      |
| NM_001098205 | HNRNPF   | 1916 | 2042 | 4.34084415108      |
| NM_001098205 | HNRNPF   | 156  | 264  | 3.53348922902      |
| NM_001098205 | HNRNPF   | 554  | 722  | 4.70341423046      |
| NM_001098205 | HNRNPF   | 402  | 431  | 1.44935001964      |
| NM_001098205 | HNRNPF   | 1264 | 1355 | 3.53348922902      |
| NM_001098205 | HNRNPF   | 1565 | 1797 | 4.11845172974      |
| NM_001098205 | HNRNPF   | 272  | 393  | 3.11845172974      |
| NM_172226    | CAMKK2   | 4666 | 4725 | 7.41809774088      |
| NM_000849    | GSTM3    | 900  | 941  | 6.54941784141      |
| NM_000849    | GSTM3    | 307  | 384  | 7.35677276347      |
| NM_000849    | GSTM3    | 2181 | 2213 | 5.46527863203      |
| NM_000849    | GSTM3    | 971  | 1062 | 6.87134570038      |
| NM_000849    | GSTM3    | 783  | 858  | 6.13438034213      |
| NM_000849    | GSTM3    | 568  | 743  | 7.35677276347      |
| NM_000849    | GSTM3    | 413  | 538  | 7.13438034213      |
| NM_000846    | GSTA2    | 653  | 672  | 7.2708354549       |
| NM_001123068 | PPIAL4G  | 201  | 236  | 4.52540740375      |
| NM_001123068 | PPIAL4G  | 481  | 522  | 6.84733549864      |
| NM_001123068 | PPIAL4G  | 679  | 721  | 6.52540740375      |
| NM_001123068 | PPIAL4G  | 330  | 416  | 8.11036990447      |
| NM_001123068 | PPIAL4G  | 565  | 600  | 6.84733549864      |
| NM_001123068 | PPIAL4G  | 110  | 171  | 6.11036990447      |
| NM_001123068 | PPIAL4G  | 614  | 673  | 5.52540740375      |
| NM_006244    | PPP2R5B  | 1012 | 1092 | 10.4746755769      |
| NM_006244    | PPP2R5B  | 1870 | 1931 | 9.39053636754      |
| NM_002737    | PRKCA    | 592  | 662  | 7.34268688303      |
| NM_002737    | PRKCA    | 8165 | 8209 | 5.10088039735      |
| NM_002737    | PRKCA    | 728  | 793  | 6.10489126647      |
| NM_002737    | PRKCA    | 2189 | 2255 | 6.68968674793      |
| NM_002737    | PRKCA    | 1244 | 1321 | 7.10088039735      |
| NM_002737    | PRKCA    | 44   | 118  | 6.60572128886      |
| NM_031490    | LONP2    | 987  | 1096 | 7.45331192506      |
| NM_031490    | LONP2    | 1129 | 1172 | 6.13121007986      |
| NM_031490    | LONP2    | 1838 | 1913 | 7.93873875223      |
| NM_031490    | LONP2    | 1916 | 1992 | 6.12736623         |
| NM_031490    | LONP2    | 1469 | 1546 | 5.13138382263      |
| NM_031492    | RBM4B    | 1616 | 1672 | 7.66037470837      |
| NM_031492    | RBM4B    | 1366 | 1462 | 7.66020768911      |
| NM_031492    | RBM4B    | 1705 | 1749 | 5.57624223004      |
| NM_031492    | RBM4B    | 159  | 196  | 6.66038143942      |
| NM_031492    | RBM4B    | 236  | 334  | 8.46773636148      |
| NM_024650    | C11orf80 |      | 1050 | 1099 8.73244438753 |
| NM_024650    | C11orf80 |      | 860  | 964 11.5397995455  |
| NM_024650    | C11orf80 |      | 1711 | 1748 8.64830541407 |
| NM_024650    | C11orf80 |      | 1328 | 1386 9.73244438753 |
| NM_024653    | PRKRIP1  | 324  | 361  | 4.41595956722      |
| NM_024654    | NOL9     | 5894 | 5936 | 7.98238994286      |
| NM_024654    | NOL9     | 1005 | 1059 | 8.56734571275      |
| NM_024654    | NOL9     | 1737 | 1791 | 6.98238321203      |

|           |         |      |      |               |
|-----------|---------|------|------|---------------|
| NM_024654 | NOL9    | 3992 | 4023 | 6.8982507337  |
| NM_024654 | NOL9    | 1491 | 1544 | 8.48321323442 |
| NM_024654 | NOL9    | 1898 | 1984 | 8.56734571275 |
| NM_024656 | GLT25D1 | 448  | 656  | 10.0242317223 |
| NM_024656 | GLT25D1 | 2417 | 2483 | 4.98589620255 |
| NM_024656 | GLT25D1 | 1789 | 1905 | 8.07003541193 |
| NM_024656 | GLT25D1 | 2301 | 2357 | 6.07002868088 |
| NM_024656 | GLT25D1 | 381  | 443  | 7.07003541193 |
| NM_024656 | GLT25D1 | 2703 | 2828 | 7.07003541193 |
| NM_024656 | GLT25D1 | 1628 | 1781 | 9.39196350682 |
| NM_024656 | GLT25D1 | 276  | 375  | 7.39196350682 |
| NM_024656 | GLT25D1 | 1227 | 1617 | 10.2399604134 |
| NM_024656 | GLT25D1 | 3289 | 3430 | 8.39196350682 |
| NM_024656 | GLT25D1 | 2951 | 3044 | 7.39196350682 |
| NM_024656 | GLT25D1 | 1910 | 2018 | 7.07003541193 |
| NM_024656 | GLT25D1 | 668  | 967  | 9.46235283471 |
| NM_024656 | GLT25D1 | 3473 | 3546 | 6.07003541193 |
| NM_024656 | GLT25D1 | 2840 | 2950 | 7.39196350682 |
| NM_024656 | GLT25D1 | 118  | 194  | 6.07003540438 |
| NM_024656 | GLT25D1 | 3082 | 3205 | 8.07003541193 |
| NM_024656 | GLT25D1 | 980  | 1178 | 8.07003541193 |
| NM_024656 | GLT25D1 | 2496 | 2606 | 7.07003541193 |
| NM_024656 | GLT25D1 | 2104 | 2239 | 7.65499791265 |
| NM_024656 | GLT25D1 | 2358 | 2409 | 5.07002868088 |
| NM_024658 | IP04    | 1245 | 1295 | 5.34061567884 |
| NM_024658 | IP04    | 615  | 696  | 8.00971738895 |
| NM_024658 | IP04    | 3174 | 3214 | 7.00971738895 |
| NM_024658 | IP04    | 2664 | 2719 | 6.42073728805 |
| NM_024658 | IP04    | 2817 | 2871 | 5.42073728805 |
| NM_024658 | IP04    | 2467 | 2552 | 6.42475488822 |
| NM_024658 | IP04    | 3343 | 3411 | 6.42073728805 |
| NM_024658 | IP04    | 2067 | 2145 | 6.42475488823 |
| NM_024658 | IP04    | 2591 | 2644 | 7.0097173814  |
| NM_024658 | IP04    | 3448 | 3486 | 6.42458113791 |
| NM_024658 | IP04    | 3215 | 3284 | 5.42475465231 |
| NM_024658 | IP04    | 1121 | 1160 | 6.42475465231 |
| NM_024658 | IP04    | 1014 | 1112 | 5.42475488823 |
| NM_024658 | IP04    | 700  | 786  | 7.74668298311 |
| NM_024658 | IP04    | 816  | 910  | 5.42475488823 |
| NM_024658 | IP04    | 2209 | 2302 | 6.42475488823 |
| NM_024658 | IP04    | 919  | 999  | 6.424754888   |
| NM_024658 | IP04    | 1571 | 1648 | 6.42475488822 |
| NM_024658 | IP04    | 367  | 484  | 5.42475488822 |
| NM_002105 | H2AFX   | 928  | 978  | 5.04077366508 |
| NM_002105 | H2AFX   | 50   | 101  | 6.62975376575 |
| NM_002105 | H2AFX   | 1195 | 1244 | 6.04077366508 |
| NM_002105 | H2AFX   | 211  | 373  | 7.62975376598 |
| NM_002105 | H2AFX   | 1396 | 1605 | 7.62975376598 |
| NM_004299 | ABCB7   | 1246 | 1321 | 6.65061516922 |
| NM_004299 | ABCB7   | 772  | 813  | 5.65061516922 |

|              |         |      |      |               |
|--------------|---------|------|------|---------------|
| NM_004299    | ABCB7   | 1125 | 1212 | 7.97656086428 |
| NM_004299    | ABCB7   | 1004 | 1125 | 5.65462603834 |
| NM_014232    | VAMP2   | 533  | 600  | 6.99722438083 |
| NM_001077180 | METTTL9 | 1150 | 1208 | 7.87799345941 |
| NM_001077180 | METTTL9 | 749  | 812  | 6.46295595258 |
| NM_001077180 | METTTL9 | 655  | 734  | 7.1999215543  |
| NM_001077180 | METTTL9 | 1028 | 1099 | 7.1999215543  |
| NM_001077180 | METTTL9 | 1533 | 1578 | 5.87798672836 |
| NM_001077180 | METTTL9 | 448  | 549  | 8.33742507805 |
| NM_001077180 | METTTL9 | 389  | 448  | 5.87799345941 |
| NM_001077180 | METTTL9 | 866  | 925  | 6.87799345941 |
| NM_001077180 | METTTL9 | 1353 | 1466 | 5.87799345941 |
| NM_001077180 | METTTL9 | 551  | 639  | 8.04791846085 |
| NM_001077180 | METTTL9 | 254  | 339  | 7.1999215543  |
| NM_001077181 | CDC14B  | 4290 | 4329 | 5.58485444007 |
| NM_001136137 | RPL28   | 45   | 249  | 3.17271820084 |
| NM_178549    | ZNF678  | 6260 | 6279 | 9.27815093593 |
| NM_178549    | ZNF678  | 4785 | 4816 | 9.28216180505 |
| NM_178547    | ZBTB80S | 232  | 294  | 7.15682168297 |
| NM_178547    | ZBTB80S | 326  | 383  | 6.41985608881 |
| NM_178544    | ZNF546  | 3104 | 3139 | 8.24432665756 |
| NM_001145268 | FAM185A | 291  | 333  | 7.38569672851 |
| NM_174940    | TMEM80  | 380  | 438  | 10.8056584744 |
| NM_001099645 | RPL22L1 | 430  | 487  | 4.1935377823  |
| NM_001099645 | RPL22L1 | 219  | 275  | 4.77867402579 |
| NM_001099642 | FTSJD1  | 2175 | 2230 | 7.54753241157 |
| NM_015666    | GTPBP5  | 166  | 213  | 6.71989334042 |
| NM_015666    | GTPBP5  | 953  | 1027 | 8.3088732054  |
| NM_015666    | GTPBP5  | 57   | 116  | 7.71989334042 |
| NM_014262    | LEPREL2 | 1248 | 1314 | 7.62547004587 |
| NM_014262    | LEPREL2 | 1712 | 1751 | 6.5413310724  |
| NM_014262    | LEPREL2 | 1885 | 1943 | 8.21025903219 |
| NM_014262    | LEPREL2 | 724  | 771  | 7.62546355073 |
| NM_014262    | LEPREL2 | 179  | 207  | 8.12629357313 |
| NM_014262    | LEPREL2 | 657  | 709  | 6.62529653147 |
| NM_014262    | LEPREL2 | 1100 | 1157 | 6.5413310724  |
| NM_014262    | LEPREL2 | 1639 | 1702 | 7.5413310724  |
| NM_014262    | LEPREL2 | 1496 | 1586 | 7.62547028179 |
| NM_014263    | YME1L1  | 1505 | 1548 | 6.47375554647 |
| NM_014263    | YME1L1  | 2084 | 2144 | 6.79568364135 |
| NM_014263    | YME1L1  | 1234 | 1328 | 7.64368054791 |
| NM_014263    | YME1L1  | 1558 | 1597 | 6.05871804719 |
| NM_014263    | YME1L1  | 2047 | 2079 | 4.46973794629 |
| NM_014263    | YME1L1  | 3727 | 3777 | 4.47375531055 |
| NM_014263    | YME1L1  | 2417 | 2493 | 6.47375554647 |
| NM_014263    | YME1L1  | 168  | 368  | 8.9331871651  |
| NM_014263    | YME1L1  | 1896 | 2028 | 7.28111046852 |
| NM_014263    | YME1L1  | 383  | 528  | 8.17419526461 |
| NM_014263    | YME1L1  | 1618 | 1820 | 9.05871804719 |
| NM_014263    | YME1L1  | 738  | 1225 | 9.9656086428  |

|              |          |      |      |               |               |
|--------------|----------|------|------|---------------|---------------|
| NM_014263    | YME1L1   | 2165 | 2401 | 8.47375554647 |               |
| NM_014263    | YME1L1   | 1335 | 1446 | 7.28111046852 |               |
| NM_014263    | YME1L1   | 554  | 737  | 8.28111046852 |               |
| NM_014263    | YME1L1   | 2745 | 2848 | 6.79568364135 |               |
| NM_014263    | YME1L1   | 3580 | 3706 | 6.79568364135 |               |
| NM_014263    | YME1L1   | 2876 | 3019 | 6.05871804719 |               |
| NM_014260    | PFDN6    | 236  | 323  | 5.53430323585 |               |
| NM_014260    | PFDN6    | 162  | 225  | 5.53429674072 |               |
| NM_014267    | C11orf58 |      | 289  | 357           | 3.38633167438 |
| NM_014267    | C11orf58 |      | 151  | 214           | 2.9712941751  |
| NM_014267    | C11orf58 |      | 608  | 658           | 2.97112042478 |
| NM_014267    | C11orf58 |      | 507  | 588           | 3.9712941751  |
| NM_014267    | C11orf58 |      | 1393 | 1472          | 2.38231407421 |
| NM_014267    | C11orf58 |      | 1304 | 1392          | 2.9712941751  |
| NM_001171988 | AGA      | 1110 | 1165 | 5.58721156034 |               |
| NM_001171988 | AGA      | 278  | 373  | 6.67135076973 |               |
| NM_018294    | CWF19L1  | 463  | 512  | 7.86804268051 |               |
| NM_018294    | CWF19L1  | 253  | 305  | 6.19894097062 |               |
| NM_018294    | CWF19L1  | 799  | 873  | 6.19894097062 |               |
| NM_018292    | QRSL1    | 1317 | 1361 | 6.73907689698 |               |
| NM_018362    | LIN7C    | 2309 | 2355 | 3.89743433527 |               |
| NM_018362    | LIN7C    | 3947 | 4003 | 3.98157354466 |               |
| NM_018362    | LIN7C    | 1789 | 1858 | 3.98139979434 |               |
| NM_015241    | MICAL3   | 2208 | 2249 | 8.77674754812 |               |
| NM_015241    | MICAL3   | 4487 | 4525 | 7.772736679   |               |
| NM_015241    | MICAL3   | 7621 | 7689 | 8.77658052886 |               |
| NM_015241    | MICAL3   | 1895 | 1936 | 8.77658052886 |               |
| NM_015241    | MICAL3   | 8927 | 8968 | 10.0986823665 |               |
| NM_015241    | MICAL3   | 7153 | 7199 | 7.772736679   |               |
| NM_015241    | MICAL3   | 1967 | 2017 | 8.77675427162 |               |
| NM_015241    | MICAL3   | 1724 | 1826 | 9.77675427917 |               |
| NM_015241    | MICAL3   | 1246 | 1358 | 9.36171677989 |               |
| NM_015241    | MICAL3   | 8316 | 8358 | 7.772736679   |               |
| NM_015241    | MICAL3   | 818  | 895  | 9.36171677967 |               |
| NM_015241    | MICAL3   | 6078 | 6172 | 9.36171677989 |               |
| NM_015241    | MICAL3   | 2026 | 2110 | 9.77675427917 |               |
| NM_015241    | MICAL3   | 7483 | 7531 | 7.772736679   |               |
| NM_015241    | MICAL3   | 2745 | 2858 | 9.36171677989 |               |
| NM_015241    | MICAL3   | 8850 | 8903 | 8.77675427162 |               |
| NM_015241    | MICAL3   | 7413 | 7466 | 9.27757757051 |               |
| NM_015241    | MICAL3   | 2432 | 2521 | 8.77675427917 |               |
| NM_015241    | MICAL3   | 7531 | 7607 | 9.36171677967 |               |
| NM_015241    | MICAL3   | 1430 | 1584 | 10.7767542792 |               |
| NM_015241    | MICAL3   | 9291 | 9359 | 7.77675404325 |               |
| NM_015241    | MICAL3   | 388  | 470  | 7.77675404325 |               |
| NM_015241    | MICAL3   | 8224 | 8308 | 7.77675404325 |               |
| NM_015241    | MICAL3   | 4882 | 4996 | 9.77675427917 |               |
| NM_015241    | MICAL3   | 722  | 804  | 9.77675427162 |               |
| NM_018360    | TXLNG    | 1750 | 1801 | 7.02424630153 |               |
| NM_018367    | ACER3    | 2095 | 2143 | 9.49579409492 |               |

|              |         |      |      |               |
|--------------|---------|------|------|---------------|
| NM_018367    | ACER3   | 426  | 476  | 11.1648955691 |
| NM_018367    | ACER3   | 197  | 266  | 11.5799332968 |
| NM_018367    | ACER3   | 266  | 358  | 11.5799330684 |
| NM_015246    | MGRN1   | 1375 | 1453 | 5.56253746594 |
| NM_015246    | MGRN1   | 2005 | 2052 | 5.56253746594 |
| NM_015246    | MGRN1   | 664  | 768  | 6.14750020258 |
| NM_015246    | MGRN1   | 2678 | 2792 | 5.56253770186 |
| NM_015245    | ANKS1A  | 5486 | 5550 | 6.45423884692 |
| NM_015245    | ANKS1A  | 6134 | 6188 | 7.45423907529 |
| NM_015245    | ANKS1A  | 3214 | 3280 | 6.45406533252 |
| NM_015245    | ANKS1A  | 3422 | 3466 | 6.45406533252 |
| NM_015245    | ANKS1A  | 2218 | 2314 | 7.45423235178 |
| NM_015245    | ANKS1A  | 4680 | 4733 | 6.37009987345 |
| NM_015245    | ANKS1A  | 1227 | 1299 | 7.45423884692 |
| NM_018364    | RSBN1   | 1284 | 1367 | 8.12459468904 |
| NM_018369    | DEPDC1B | 662  | 721  | 8.03405908838 |
| NM_018369    | DEPDC1B | 1152 | 1281 | 9.03406581943 |
| NM_018368    | LMBRD1  | 2093 | 2150 | 4.81433352168 |
| NM_018368    | LMBRD1  | 1080 | 1568 | 10.0431522122 |
| NM_018368    | LMBRD1  | 233  | 453  | 7.3992960224  |
| NM_018368    | LMBRD1  | 1588 | 2065 | 9.94361653863 |
| NM_018368    | LMBRD1  | 794  | 1075 | 9.48675886365 |
| NM_018368    | LMBRD1  | 461  | 773  | 10.1541835246 |
| NM_001008938 | CKAP5   | 3610 | 3708 | 6.46405121945 |
| NM_001008938 | CKAP5   | 6594 | 6645 | 4.46405121945 |
| NM_001008938 | CKAP5   | 784  | 848  | 6.4640512119  |
| NM_001008938 | CKAP5   | 3959 | 4021 | 5.46003361928 |
| NM_001008938 | CKAP5   | 2611 | 2703 | 5.46405121945 |
| NM_001008938 | CKAP5   | 2313 | 2352 | 4.46003361928 |
| NM_001008938 | CKAP5   | 4676 | 4734 | 4.4640512119  |
| NM_001008938 | CKAP5   | 4788 | 4832 | 6.46405121945 |
| NM_001008938 | CKAP5   | 1816 | 1920 | 6.04901372017 |
| NM_001008938 | CKAP5   | 3439 | 3531 | 6.04901372017 |
| NM_001008938 | CKAP5   | 4852 | 4902 | 4.46387746913 |
| NM_001008938 | CKAP5   | 6358 | 6422 | 6.04901372016 |
| NM_001008938 | CKAP5   | 5629 | 5680 | 4.46404448839 |
| NM_001008938 | CKAP5   | 4917 | 4974 | 5.46405121945 |
| NM_001008938 | CKAP5   | 649  | 733  | 6.04901372017 |
| NM_001008938 | CKAP5   | 6439 | 6504 | 4.46404448839 |
| NM_001008938 | CKAP5   | 454  | 528  | 4.46405098353 |
| NM_001008938 | CKAP5   | 1991 | 2056 | 6.04901371262 |
| NM_001008938 | CKAP5   | 735  | 782  | 5.46405098353 |
| NM_001008938 | CKAP5   | 2233 | 2296 | 6.04901372017 |
| NM_001008938 | CKAP5   | 2137 | 2230 | 5.46405121945 |
| NM_001008938 | CKAP5   | 2424 | 2544 | 6.04901372017 |
| NM_001008938 | CKAP5   | 5232 | 5341 | 7.04901372017 |
| NM_001008938 | CKAP5   | 5351 | 5487 | 6.04901372017 |
| NM_001008938 | CKAP5   | 2955 | 3224 | 6.78597931434 |
| NM_001008938 | CKAP5   | 5026 | 5151 | 6.78597931434 |
| NM_001008938 | CKAP5   | 1584 | 1717 | 5.46405121945 |

|              |              |      |      |               |               |
|--------------|--------------|------|------|---------------|---------------|
| NM_001008938 | CKAP5        | 4322 | 4420 | 4.46387746913 |               |
| NM_001008938 | CKAP5        | 3835 | 3924 | 6.04901372017 |               |
| NM_001008938 | CKAP5        | 2802 | 2879 | 5.46387746913 |               |
| NM_001008938 | CKAP5        | 1148 | 1229 | 7.27140614151 |               |
| NM_001008938 | CKAP5        | 4588 | 4655 | 6.04901372016 |               |
| NM_001008938 | CKAP5        | 5931 | 6082 | 6.78597931434 |               |
| NM_019013    | FAM64A       | 37   | 124  | 10.5844179055 |               |
| NM_019014    | POLR1B       | 1254 | 1315 | 7.45101031753 |               |
| NM_019014    | POLR1B       | 2386 | 2503 | 8.45118406785 |               |
| NM_019014    | POLR1B       | 3871 | 3957 | 8.03614656857 |               |
| NM_019014    | POLR1B       | 2626 | 2714 | 6.45118406785 |               |
| NM_019014    | POLR1B       | 1364 | 1435 | 8.45118406763 |               |
| NM_019014    | POLR1B       | 4076 | 4172 | 7.4511773368  |               |
| NM_019015    | CHPF2        | 1759 | 1809 | 7.12903857939 |               |
| NM_019015    | CHPF2        | 572  | 644  | 10.3831027902 |               |
| NM_019015    | CHPF2        | 3225 | 3272 | 7.12903857939 |               |
| NM_019015    | CHPF2        | 1573 | 1603 | 8.12903857939 |               |
| NM_019015    | CHPF2        | 2026 | 2080 | 7.2091601886  |               |
| NM_019015    | CHPF2        | 1502 | 1562 | 7.21317778855 |               |
| NM_019015    | CHPF2        | 1840 | 1924 | 8.21317778122 |               |
| NM_019015    | CHPF2        | 479  | 552  | 7.21300403846 |               |
| NM_019015    | CHPF2        | 2385 | 2440 | 7.12903857939 |               |
| NM_019015    | CHPF2        | 3642 | 3701 | 8.71400108011 |               |
| NM_019015    | CHPF2        | 1069 | 1201 | 10.2131777888 |               |
| NM_001135865 | LOC100132247 |      | 664  | 776           | 7.32613702962 |
| NM_001135865 | LOC100132247 |      | 2213 | 2248          | 5.00420869882 |
| NM_001135865 | LOC100132247 |      | 2090 | 2196          | 7.00420893474 |
| NM_001135865 | LOC100132247 |      | 935  | 991           | 5.00420893474 |
| NM_001135865 | LOC100132247 |      | 3518 | 3596          | 5.00420893474 |
| NM_001135865 | LOC100132247 |      | 2645 | 2815          | 7.81156385679 |
| NM_001135865 | LOC100132247 |      | 0    | 107           | 5.00420893474 |
| NM_001135865 | LOC100132247 |      | 3610 | 3757          | 7.58917143546 |
| NM_001135865 | LOC100132247 |      | 233  | 315           | 7.00420893474 |
| NM_001135865 | LOC100132247 |      | 546  | 654           | 6.00420893474 |
| NM_001135865 | LOC100132247 |      | 400  | 541           | 7.32613702962 |
| NM_001135865 | LOC100132247 |      | 2896 | 2977          | 7.00420893474 |
| NM_001135865 | LOC100132247 |      | 1406 | 1656          | 7.81156385679 |
| NM_001135865 | LOC100132247 |      | 2393 | 2618          | 8.32613702962 |
| NM_001135865 | LOC100132247 |      | 2984 | 3398          | 8.46364055337 |
| NM_001135865 | LOC100132247 |      | 1019 | 1250          | 7.58917143546 |
| NM_001135865 | LOC100132247 |      | 2251 | 2393          | 7.32613702962 |
| NM_001135865 | LOC100132247 |      | 1657 | 2090          | 8.17413393618 |
| NM_001135865 | LOC100132247 |      | 3421 | 3511          | 5.00420893474 |
| NM_005178    | BCL3         | 1696 | 1741 | 9.42274961583 |               |
| NM_005178    | BCL3         | 1592 | 1683 | 11.7486953109 |               |
| NM_001204468 | RBM10        | 1997 | 2040 | 4.95982763858 |               |
| NM_001204468 | RBM10        | 1875 | 1930 | 4.96367148844 |               |
| NM_001204468 | RBM10        | 2100 | 2209 | 6.96384523876 |               |
| NM_001204468 | RBM10        | 151  | 195  | 4.96367148844 |               |
| NM_001204468 | RBM10        | 1040 | 1110 | 4.96384523853 |               |



|              |          |      |      |                    |
|--------------|----------|------|------|--------------------|
| NM_001204468 | RBM10    | 2944 | 3026 | 4.96384500284      |
| NM_005174    | ATP5C1   | 674  | 722  | 4.3284626352       |
| NM_005174    | ATP5C1   | 446  | 552  | 6.14956743875      |
| NM_005174    | ATP5C1   | 997  | 1042 | 4.41260184457      |
| NM_005174    | ATP5C1   | 142  | 188  | 3.82362174369      |
| NM_005174    | ATP5C1   | 934  | 976  | 5.41260184458      |
| NM_005174    | ATP5C1   | 564  | 671  | 6.63499426592      |
| NM_005174    | ATP5C1   | 258  | 422  | 6.91510218511      |
| NM_005174    | ATP5C1   | 57   | 128  | 3.82763933631      |
| NM_005174    | ATP5C1   | 726  | 903  | 6.73452993947      |
| NM_005175    | ATP5G1   | 416  | 485  | 9.55768979884      |
| NM_005175    | ATP5G1   | 500  | 558  | 9.55768979884      |
| NM_005175    | ATP5G1   | 340  | 397  | 9.47355059701      |
| NM_005175    | ATP5G1   | 154  | 231  | 10.2946554006      |
| NM_005176    | ATP5G2   | 290  | 339  | 7.94473121734      |
| NM_005176    | ATP5G2   | 751  | 789  | 6.94455746703      |
| NM_005176    | ATP5G2   | 346  | 729  | 10.6996187195      |
| NM_005176    | ATP5G2   | 796  | 865  | 7.52969371806      |
| NM_178156    | FUT8     | 1613 | 1698 | 8.4117109999       |
| NM_178156    | FUT8     | 3163 | 3243 | 8.41170426885      |
| NM_178156    | FUT8     | 3454 | 3494 | 7.32757179052      |
| NM_178156    | FUT8     | 1442 | 1513 | 7.4117109999       |
| NM_178156    | FUT8     | 3687 | 3786 | 8.41170426885      |
| NM_178156    | FUT8     | 1779 | 1877 | 7.41171099968      |
| NM_178156    | FUT8     | 3024 | 3113 | 6.41171099968      |
| NM_178156    | FUT8     | 1719 | 1779 | 6.41170426885      |
| NM_178156    | FUT8     | 2047 | 2273 | 8.99667350062      |
| NM_178156    | FUT8     | 2368 | 2512 | 9.58163600134      |
| NM_005171    | ATF1     | 1501 | 1548 | 8.28995793729      |
| NM_005171    | ATF1     | 132  | 191  | 6.6210299775       |
| NM_152906    | C22orf25 |      | 1516 | 1586 7.90607552302 |
| NM_152906    | C22orf25 |      | 2132 | 2193 9.57115963295 |
| NM_152906    | C22orf25 |      | 940  | 1060 9.57517723312 |
| NM_001137559 | ANAPC5   | 1702 | 1750 | 5.10884398135      |
| NM_001137559 | ANAPC5   | 1012 | 1132 | 6.43077207645      |
| NM_001137559 | ANAPC5   | 792  | 843  | 5.69380647474      |
| NM_001137559 | ANAPC5   | 570  | 619  | 5.02470477218      |
| NM_001137559 | ANAPC5   | 708  | 755  | 4.10884398157      |
| NM_001137559 | ANAPC5   | 1795 | 1862 | 4.10884374565      |
| NM_001137559 | ANAPC5   | 957  | 1002 | 5.02470477218      |
| NM_001137559 | ANAPC5   | 1375 | 1483 | 6.69380648229      |
| NM_001137559 | ANAPC5   | 1929 | 2057 | 5.10884398157      |
| NM_001137559 | ANAPC5   | 399  | 520  | 6.10884398157      |
| NM_001137559 | ANAPC5   | 183  | 364  | 7.27876898301      |
| NM_001137559 | ANAPC5   | 2116 | 2238 | 5.69380648229      |
| NM_001137559 | ANAPC5   | 1555 | 1700 | 6.69380648229      |
| NM_152905    | NEDD1    | 1647 | 1705 | 7.67458341714      |
| NM_152905    | NEDD1    | 940  | 996  | 6.75470502635      |
| NM_152905    | NEDD1    | 1060 | 1101 | 6.7585488762       |
| NM_152905    | NEDD1    | 834  | 909  | 6.7585488762       |

|              |         |       |       |               |
|--------------|---------|-------|-------|---------------|
| NM_152902    | TIPRL   | 310   | 351   | 6.08988488366 |
| NM_152902    | TIPRL   | 1061  | 1109  | 7.67501440365 |
| NM_152902    | TIPRL   | 392   | 466   | 7.08604103381 |
| NM_152902    | TIPRL   | 815   | 867   | 7.09005863398 |
| NM_152902    | TIPRL   | 467   | 545   | 7.09005863398 |
| NM_152903    | KBTBD6  | 765   | 819   | 8.52498925107 |
| NM_001105214 | ASH2L   | 410   | 482   | 6.40359089645 |
| NM_053045    | TMEM203 | 271   | 325   | 8.68860178631 |
| NM_053045    | TMEM203 | 379   | 437   | 7.69261265542 |
| NM_053043    | RBM33   | 460   | 572   | 4.27783714337 |
| NM_053043    | RBM33   | 4446  | 4487  | 5.27783041232 |
| NM_053043    | RBM33   | 9323  | 9398  | 5.27783714315 |
| NM_053043    | RBM33   | 9418  | 9482  | 4.2738195432  |
| NM_053043    | RBM33   | 9703  | 9749  | 5.27783041232 |
| NM_053043    | RBM33   | 5102  | 5141  | 4.19369793399 |
| NM_053043    | RBM33   | 9264  | 9312  | 4.19369793399 |
| NM_053043    | RBM33   | 650   | 724   | 5.27783714337 |
| NM_053043    | RBM33   | 4948  | 5019  | 5.27783690745 |
| NM_053043    | RBM33   | 898   | 965   | 4.2738195432  |
| NM_053043    | RBM33   | 10110 | 10232 | 6.86279964409 |
| NM_053043    | RBM33   | 4714  | 4787  | 4.2738195432  |
| NM_057749    | CCNE2   | 1982  | 2042  | 9.94008753021 |
| NM_057749    | CCNE2   | 1034  | 1088  | 10.9400875302 |
| NM_057749    | CCNE2   | 1492  | 1569  | 10.0202091394 |
| NM_057749    | CCNE2   | 776   | 860   | 10.0202091394 |
| NM_004177    | STX3    | 1066  | 1098  | 4.75453572338 |
| NM_004177    | STX3    | 521   | 580   | 4.83465733259 |
| NM_004177    | STX3    | 3080  | 3134  | 3.83850118244 |
| NM_004177    | STX3    | 1946  | 2001  | 4.83465733259 |
| NM_004177    | STX3    | 848   | 933   | 5.83867493276 |
| NM_004177    | STX3    | 2464  | 2499  | 3.83850118244 |
| NM_004177    | STX3    | 1494  | 1640  | 6.42363743348 |
| NM_004177    | STX3    | 2229  | 2284  | 3.83867469684 |
| NM_004177    | STX3    | 990   | 1062  | 4.83867492521 |
| NM_004177    | STX3    | 2043  | 2072  | 5.3394982241  |
| NM_004177    | STX3    | 773   | 848   | 5.42363719756 |
| NM_004177    | STX3    | 2895  | 3027  | 6.42363743348 |
| NM_004177    | STX3    | 2753  | 2825  | 4.83866820171 |
| NM_004177    | STX3    | 2521  | 2592  | 5.42363743348 |
| NM_004177    | STX3    | 584   | 753   | 5.83867493276 |
| NM_004177    | STX3    | 1309  | 1437  | 6.64602985482 |
| NM_004177    | STX3    | 1187  | 1297  | 6.16060302765 |
| NM_004177    | STX3    | 1661  | 1717  | 5.42363743348 |
| NM_001415    | EIF2S3  | 22    | 122   | 5.7326160123  |
| NM_001415    | EIF2S3  | 2707  | 2808  | 4.31757851302 |
| NM_001415    | EIF2S3  | 898   | 950   | 2.64847680291 |
| NM_001415    | EIF2S3  | 3218  | 3254  | 2.64847680291 |
| NM_001415    | EIF2S3  | 1523  | 1563  | 2.72859841212 |
| NM_001415    | EIF2S3  | 2223  | 2304  | 5.53997093435 |
| NM_001415    | EIF2S3  | 137   | 249   | 6.31757851302 |

|              |          |       |       |                   |
|--------------|----------|-------|-------|-------------------|
| NM_001415    | EIF2S3   | 2981  | 3062  | 2.73244226198     |
| NM_001415    | EIF2S3   | 1585  | 1669  | 5.7326160123      |
| NM_001415    | EIF2S3   | 2317  | 2359  | 3.72859841212     |
| NM_001415    | EIF2S3   | 1730  | 1817  | 3.7326160123      |
| NM_001415    | EIF2S3   | 741   | 875   | 5.7326160123      |
| NM_001415    | EIF2S3   | 1392  | 1491  | 5.53997093435     |
| NM_001415    | EIF2S3   | 3285  | 3379  | 2.73261601229     |
| NM_001415    | EIF2S3   | 279   | 695   | 7.59059700742     |
| NM_001415    | EIF2S3   | 2025  | 2169  | 5.53997093435     |
| NM_001415    | EIF2S3   | 1198  | 1288  | 2.73261601207     |
| NM_001415    | EIF2S3   | 958   | 1131  | 6.05454410718     |
| NM_001109977 | FAM160A1 |       | 742   | 816 10.5372548996 |
| NM_001410    | MEGF8    | 798   | 818   | 8.6705129785      |
| NM_001410    | MEGF8    | 6969  | 7025  | 8.67453034275     |
| NM_001410    | MEGF8    | 5046  | 5095  | 9.67453034275     |
| NM_001410    | MEGF8    | 6520  | 6565  | 10.2594928435     |
| NM_001410    | MEGF8    | 10223 | 10260 | 9.6705129785      |
| NM_001410    | MEGF8    | 5833  | 5901  | 9.67453057112     |
| NM_001410    | MEGF8    | 2817  | 2852  | 8.67435682835     |
| NM_001410    | MEGF8    | 9136  | 9208  | 9.67453057867     |
| NM_001410    | MEGF8    | 7884  | 7921  | 8.6705129785      |
| NM_001410    | MEGF8    | 1862  | 1940  | 8.67435682835     |
| NM_001410    | MEGF8    | 5536  | 5586  | 10.2594930718     |
| NM_001410    | MEGF8    | 5271  | 5300  | 8.59039136929     |
| NM_001410    | MEGF8    | 4464  | 4516  | 8.59039136929     |
| NM_001410    | MEGF8    | 4717  | 4756  | 9.59039136929     |
| NM_001410    | MEGF8    | 6189  | 6246  | 9.67453057867     |
| NM_001410    | MEGF8    | 4104  | 4176  | 8.67452384762     |
| NM_001410    | MEGF8    | 3775  | 3872  | 10.2594930794     |
| NM_001410    | MEGF8    | 834   | 923   | 8.67453057867     |
| NM_001410    | MEGF8    | 8899  | 8951  | 9.6705129785      |
| NM_001410    | MEGF8    | 3489  | 3531  | 8.6705129785      |
| NM_001410    | MEGF8    | 2939  | 3030  | 10.2594930718     |
| NM_001410    | MEGF8    | 4789  | 4862  | 10.2594930792     |
| NM_001410    | MEGF8    | 8375  | 8480  | 10.2594930794     |
| NM_001419    | ELAVL1   | 1204  | 1234  | 3.61771050315     |
| NM_001419    | ELAVL1   | 2246  | 2296  | 4.70184298148     |
| NM_001419    | ELAVL1   | 722   | 781   | 4.70184971253     |
| NM_001419    | ELAVL1   | 1538  | 1602  | 4.70184298148     |
| NM_001419    | ELAVL1   | 2182  | 2219  | 3.69783211236     |
| NM_001419    | ELAVL1   | 1160  | 1204  | 3.70184971253     |
| NM_001419    | ELAVL1   | 818   | 879   | 5.28681221325     |
| NM_001419    | ELAVL1   | 1882  | 1935  | 3.61771050315     |
| NM_001419    | ELAVL1   | 612   | 722   | 4.70184971253     |
| NM_001419    | ELAVL1   | 2048  | 2153  | 6.50920463459     |
| NM_001419    | ELAVL1   | 1374  | 1522  | 5.70184971253     |
| NM_001419    | ELAVL1   | 922   | 1055  | 5.70184971253     |
| NM_001419    | ELAVL1   | 166   | 587   | 8.22541166859     |
| NM_001419    | ELAVL1   | 1234  | 1298  | 4.70184971253     |
| NM_001419    | ELAVL1   | 1941  | 2036  | 5.28681221325     |

|           |         |      |      |               |
|-----------|---------|------|------|---------------|
| NM_022720 | DGCR8   | 2067 | 2121 | 7.96522839239 |
| NM_022720 | DGCR8   | 1685 | 1764 | 7.37624852741 |
| NM_022720 | DGCR8   | 356  | 413  | 6.38026612759 |
| NM_022720 | DGCR8   | 1768 | 1837 | 6.2961269182  |
| NM_022720 | DGCR8   | 1537 | 1650 | 6.38026589167 |
| NM_022720 | DGCR8   | 3598 | 3781 | 7.38026612759 |
| NM_022720 | DGCR8   | 4169 | 4240 | 7.96505487799 |
| NM_022720 | DGCR8   | 1087 | 1201 | 7.9652286283  |
| NM_022720 | DGCR8   | 3989 | 4066 | 6.38026612736 |
| NM_022727 | TRMT2A  | 1563 | 1610 | 9.45124637595 |
| NM_022727 | TRMT2A  | 567  | 636  | 9.451253107   |
| NM_022727 | TRMT2A  | 373  | 410  | 8.45107935668 |
| NM_022727 | TRMT2A  | 1672 | 1717 | 8.45107935668 |
| NM_022727 | TRMT2A  | 2004 | 2048 | 9.44723550683 |
| NM_022727 | TRMT2A  | 1095 | 1148 | 8.45107935668 |
| NM_022098 | XPNPEP3 | 4576 | 4628 | 8.58583951346 |
| NM_022098 | XPNPEP3 | 944  | 983  | 8.58566576314 |
| NM_022098 | XPNPEP3 | 1792 | 1848 | 8.58182191329 |
| NM_022098 | XPNPEP3 | 840  | 890  | 10.5818219133 |
| NM_022098 | XPNPEP3 | 450  | 514  | 8.58182191329 |
| NM_022098 | XPNPEP3 | 585  | 660  | 9.50170030408 |
| NM_183235 | RAB27A  | 212  | 266  | 8.15571081341 |
| NM_183235 | RAB27A  | 756  | 836  | 8.15186696355 |
| NM_183235 | RAB27A  | 2222 | 2293 | 6.56690446283 |
| NM_006996 | SLC19A2 | 1223 | 1256 | 10.2183358161 |
| NM_006996 | SLC19A2 | 1545 | 1616 | 9.21431822348 |
| NM_006996 | SLC19A2 | 1409 | 1462 | 8.2183290926  |
| NM_006996 | SLC19A2 | 614  | 664  | 10.2183358161 |
| NM_006996 | SLC19A2 | 1015 | 1167 | 11.3882608251 |
| NM_006996 | SLC19A2 | 427  | 540  | 9.80329832438 |
| NM_003079 | SMARCE1 | 399  | 469  | 3.93818180399 |
| NM_006993 | NPM3    | 119  | 157  | 7.32119453669 |
| NM_006993 | NPM3    | 588  | 620  | 6.31718366757 |
| NM_006993 | NPM3    | 340  | 481  | 7.64312936263 |
| NM_006993 | NPM3    | 245  | 336  | 7.64312936263 |
| NM_006990 | WASF2   | 5337 | 5425 | 5.38609114525 |
| NM_006990 | WASF2   | 970  | 1018 | 5.30596953604 |
| NM_006990 | WASF2   | 5238 | 5268 | 6.97489749582 |
| NM_006990 | WASF2   | 5540 | 5641 | 6.97507123859 |
| NM_006990 | WASF2   | 3512 | 3580 | 5.39010873787 |
| NM_006990 | WASF2   | 355  | 420  | 7.3901085095  |
| NM_006990 | WASF2   | 3911 | 3988 | 6.39010873787 |
| NM_006990 | WASF2   | 686  | 739  | 6.39010201437 |
| NM_006990 | WASF2   | 554  | 632  | 6.38609114525 |
| NM_006990 | WASF2   | 1665 | 1780 | 7.97507124614 |
| NM_006990 | WASF2   | 4745 | 4853 | 7.97507124614 |
| NM_006990 | WASF2   | 2959 | 3059 | 6.39010873787 |
| NM_018947 | CYCS    | 2823 | 2884 | 1.5020438317  |
| NM_018947 | CYCS    | 977  | 1038 | 3.00287385409 |
| NM_018947 | CYCS    | 1298 | 1361 | 1.50205032684 |

|              |         |      |      |               |
|--------------|---------|------|------|---------------|
| NM_018947    | CYCS    | 1214 | 1293 | 4.50205056275 |
| NM_018947    | CYCS    | 536  | 711  | 5.96148218139 |
| NM_018947    | CYCS    | 718  | 907  | 4.82397865764 |
| NM_018947    | CYCS    | 106  | 478  | 6.36003155788 |
| NM_018947    | CYCS    | 1095 | 1212 | 4.50205056275 |
| NM_018946    | NANS    | 475  | 539  | 5.59608704144 |
| NM_018944    | MIS18A  | 366  | 471  | 8.04607812182 |
| NM_018941    | CLN8    | 315  | 363  | 7.01590496343 |
| NM_018941    | CLN8    | 649  | 752  | 9.82325988571 |
| NM_018941    | CLN8    | 195  | 240  | 7.01188736348 |
| NM_018941    | CLN8    | 2909 | 2972 | 7.01590496365 |
| NM_018941    | CLN8    | 2151 | 2245 | 8.60086722845 |
| NM_018941    | CLN8    | 3938 | 3972 | 6.93176575427 |
| NM_018941    | CLN8    | 943  | 1036 | 9.01590496365 |
| NM_018941    | CLN8    | 243  | 313  | 8.5968498642  |
| NM_018941    | CLN8    | 1293 | 1379 | 8.60086745682 |
| NM_018941    | CLN8    | 373  | 461  | 8.01590472773 |
| NM_020830    | WDFY1   | 1419 | 1473 | 6.52626880329 |
| NM_020830    | WDFY1   | 536  | 580  | 6.53027967241 |
| NM_020830    | WDFY1   | 1200 | 1264 | 4.94531717169 |
| NM_020831    | MKL1    | 644  | 707  | 9.08578547715 |
| NM_020832    | ZNF687  | 217  | 301  | 8.69201143706 |
| NM_001031628 | SMAGP   | 314  | 378  | 9.12141638103 |
| NM_001031628 | SMAGP   | 159  | 252  | 9.71039648192 |
| NM_001031623 | ZNF451  | 281  | 330  | 5.70225586102 |
| NM_001031623 | ZNF451  | 4981 | 5020 | 5.70225586102 |
| NM_001031623 | ZNF451  | 5030 | 5135 | 5.7863950704  |
| NM_001031623 | ZNF451  | 4648 | 4722 | 6.78639507018 |
| NM_022899    | ACTR8   | 2125 | 2206 | 6.27849179429 |
| NM_022899    | ACTR8   | 914  | 970  | 6.7833326858  |
| NM_014851    | KLHL21  | 1431 | 1499 | 9.69930853546 |
| NM_014851    | KLHL21  | 1762 | 1804 | 7.69930829954 |
| NM_014851    | KLHL21  | 3703 | 3747 | 7.69529093529 |
| NM_014851    | KLHL21  | 3850 | 3905 | 7.69529093529 |
| NM_014851    | KLHL21  | 454  | 525  | 8.69930853546 |
| NM_014851    | KLHL21  | 2682 | 2775 | 8.69930853546 |
| NM_014851    | KLHL21  | 1611 | 1701 | 8.69529093529 |
| NM_014851    | KLHL21  | 3415 | 3545 | 8.69930853546 |
| NM_014851    | KLHL21  | 1079 | 1161 | 8.61516932608 |
| NM_022892    | NAIP    | 210  | 231  | 8.31977064846 |
| NM_022892    | NAIP    | 2292 | 2345 | 8.2356314393  |
| NM_022892    | NAIP    | 2807 | 2905 | 9.31977064869 |
| NM_022896    | LPIN3   | 294  | 344  | 6.75035618669 |
| NM_022896    | LPIN3   | 2915 | 2974 | 7.75437378686 |
| NM_032864    | PRPF38A | 1113 | 1213 | 5.61649422857 |
| NM_032864    | PRPF38A | 1326 | 1368 | 5.61247663595 |
| NM_032864    | PRPF38A | 132  | 194  | 7.20145672929 |
| NM_032864    | PRPF38A | 514  | 575  | 5.61649422857 |
| NM_032866    | CGNL1   | 6257 | 6297 | 5.74410652656 |
| NM_032866    | CGNL1   | 6880 | 6920 | 6.74410652656 |

|              |           |      |      |               |               |
|--------------|-----------|------|------|---------------|---------------|
| NM_032866    | CGNL1     | 4681 | 4748 | 5.82824573595 |               |
| NM_032860    | LTV1      | 263  | 337  | 2.8998916482  |               |
| NM_032860    | LTV1      | 703  | 803  | 3.8998916482  |               |
| NM_001007025 | GOSR1     | 2685 | 2737 | 3.61020421589 |               |
| NM_001007025 | GOSR1     | 3742 | 3792 | 5.61021094672 |               |
| NM_001007025 | GOSR1     | 727  | 799  | 4.61021071102 |               |
| NM_001007025 | GOSR1     | 208  | 259  | 3.52607173756 |               |
| NM_001007025 | GOSR1     | 1206 | 1343 | 5.93213904183 |               |
| NM_001007025 | GOSR1     | 460  | 518  | 3.61021094672 |               |
| NM_001007025 | GOSR1     | 60   | 110  | 3.52607173756 |               |
| NM_001007025 | GOSR1     | 1623 | 1689 | 3.61021094694 |               |
| NM_001007025 | GOSR1     | 3607 | 3681 | 4.60619334677 |               |
| NM_001007025 | GOSR1     | 2454 | 2601 | 5.93213904183 |               |
| NM_001007025 | GOSR1     | 2116 | 2374 | 8.00252836972 |               |
| NM_001007025 | GOSR1     | 1369 | 1582 | 5.19517344766 |               |
| NM_001007025 | GOSR1     | 808  | 981  | 6.19517344766 |               |
| NM_001143958 | TMEM30A   | 3900 | 3945 | 6.0439584431  |               |
| NM_001143958 | TMEM30A   | 2470 | 2534 | 8.04413219342 |               |
| NM_001143958 | TMEM30A   | 3570 | 3611 | 6.04413219342 |               |
| NM_001143958 | TMEM30A   | 4368 | 4406 | 6.04011459325 |               |
| NM_001143958 | TMEM30A   | 1781 | 1858 | 8.36606028831 |               |
| NM_001143958 | TMEM30A   | 4256 | 4327 | 6.04412546237 |               |
| NM_001143958 | TMEM30A   | 1283 | 1382 | 9.21405719486 |               |
| NM_001143958 | TMEM30A   | 3130 | 3225 | 7.04413218587 |               |
| NM_001143958 | TMEM30A   | 3438 | 3500 | 8.04413219342 |               |
| NM_001143958 | TMEM30A   | 3036 | 3125 | 9.04413219342 |               |
| NM_001143958 | TMEM30A   | 246  | 402  | 9.36606028831 |               |
| NM_001143958 | TMEM30A   | 2694 | 2808 | 8.04413219342 |               |
| NM_001143958 | TMEM30A   | 1384 | 1709 | 11.6290946941 |               |
| NM_001143958 | TMEM30A   | 1863 | 1980 | 9.62909469414 |               |
| NM_001143958 | TMEM30A   | 2895 | 3032 | 10.5035638121 |               |
| NM_001143958 | TMEM30A   | 3225 | 3388 | 10.1315950347 |               |
| NM_001143958 | TMEM30A   | 2608 | 2677 | 8.36606028831 |               |
| NM_001143958 | TMEM30A   | 2005 | 2224 | 10.5035638121 |               |
| NM_001143958 | TMEM30A   | 888  | 1252 | 12.3109187341 |               |
| NM_001143958 | TMEM30A   | 407  | 877  | 12.2339567523 |               |
| NM_032869    | NUDCD1    | 1233 | 1302 | 7.61717765397 |               |
| NM_032869    | NUDCD1    | 1603 | 1624 | 7.11800094531 |               |
| NM_032869    | NUDCD1    | 500  | 569  | 5.6131600538  |               |
| NM_032869    | NUDCD1    | 869  | 942  | 7.61717765375 |               |
| NM_016639    | TNFRSF12A |      | 427  | 487           | 6.94934097105 |
| NM_016639    | TNFRSF12A |      | 695  | 749           | 6.94934097104 |
| NM_016639    | TNFRSF12A |      | 203  | 257           | 6.94532337087 |
| NM_016639    | TNFRSF12A |      | 297  | 417           | 9.40877258968 |
| NM_016639    | TNFRSF12A |      | 510  | 550           | 5.94532337087 |
| NM_016639    | TNFRSF12A |      | 75   | 160           | 8.27126906593 |
| NM_194449    | PHLPP1    | 2555 | 2618 | 8.92004635139 |               |
| NM_194449    | PHLPP1    | 3613 | 3680 | 7.91602875144 |               |
| NM_001170757 | FAM122B   | 1617 | 1671 | 7.11958635341 |               |
| NM_001170757 | FAM122B   | 2352 | 2410 | 7.0394647442  |               |

|              |             |      |      |               |               |
|--------------|-------------|------|------|---------------|---------------|
| NM_001170757 | FAM122B     | 1954 | 2023 | 8.12360394604 |               |
| NM_001170757 | FAM122B     | 872  | 1000 | 9.12360395359 |               |
| NM_001170757 | FAM122B     | 1130 | 1352 | 8.70856645431 |               |
| NM_018341    | C6orf70     | 491  | 552  | 9.54855314628 |               |
| NM_018341    | C6orf70     | 1519 | 1584 | 9.62867475549 |               |
| NM_001170755 | NBPF15      | 242  | 327  | 9.33354973163 |               |
| NM_001170755 | NBPF15      | 2214 | 2265 | 8.33354949571 |               |
| NM_001170755 | NBPF15      | 4292 | 4381 | 9.33354973163 |               |
| NM_001170755 | NBPF15      | 2555 | 2624 | 8.91851223235 |               |
| NM_001170755 | NBPF15      | 173  | 239  | 9.33354949571 |               |
| NM_001170755 | NBPF15      | 420  | 459  | 8.33354300057 |               |
| NM_001170755 | NBPF15      | 2639 | 2716 | 7.33354949571 |               |
| NM_001170755 | NBPF15      | 2780 | 2842 | 8.9185055013  |               |
| NM_001170755 | NBPF15      | 3579 | 3704 | 8.33354973163 |               |
| NM_001170755 | NBPF15      | 2265 | 2325 | 8.91851223235 |               |
| NM_001170755 | NBPF15      | 4450 | 4637 | 10.5034747331 |               |
| NM_001170755 | NBPF15      | 3733 | 3833 | 7.33354972408 |               |
| NM_015260    | SIN3B       | 5036 | 5095 | 5.45304468449 |               |
| NM_015260    | SIN3B       | 4776 | 4820 | 5.36890547533 |               |
| NM_138287    | DTX3L       | 2892 | 2937 | 7.62926512872 |               |
| NM_138287    | DTX3L       | 306  | 348  | 9.2180714793  |               |
| NM_138287    | DTX3L       | 960  | 1019 | 7.63328272134 |               |
| NM_138287    | DTX3L       | 1755 | 1814 | 7.54914351951 |               |
| NM_138287    | DTX3L       | 4095 | 4124 | 7.54914351951 |               |
| NM_138287    | DTX3L       | 1653 | 1693 | 8.54914351951 |               |
| NM_138287    | DTX3L       | 4306 | 4346 | 7.62926512872 |               |
| NM_138287    | DTX3L       | 4179 | 4239 | 8.62926512872 |               |
| NM_138287    | DTX3L       | 1935 | 1993 | 8.62926512872 |               |
| NM_138287    | DTX3L       | 438  | 531  | 9.95521082378 |               |
| NM_138287    | DTX3L       | 2060 | 2151 | 8.62926512872 |               |
| NM_138287    | DTX3L       | 4381 | 4408 | 7.54914351951 |               |
| NM_138287    | DTX3L       | 3850 | 3898 | 7.54914351951 |               |
| NM_138287    | DTX3L       | 2205 | 2308 | 8.63327599784 |               |
| NM_001198793 | ARPC4-TTLL3 |      | 626  | 700           | 9.51538344442 |
| NM_001198793 | ARPC4-TTLL3 |      | 2834 | 2864          | 7.43124423504 |
| NM_001198793 | ARPC4-TTLL3 |      | 739  | 814           | 9.10034594514 |
| NM_001198793 | ARPC4-TTLL3 |      | 1113 | 1237          | 9.10034594514 |
| NM_015262    | FAM21C      | 800  | 849  | 6.74253600351 |               |
| NM_015262    | FAM21C      | 1158 | 1196 | 5.74637985337 |               |
| NM_015262    | FAM21C      | 2321 | 2362 | 7.33150937335 |               |
| NM_015262    | FAM21C      | 4127 | 4189 | 6.74655359614 |               |
| NM_015262    | FAM21C      | 3578 | 3632 | 5.74253600351 |               |
| NM_015262    | FAM21C      | 3969 | 4030 | 5.74654687263 |               |
| NM_015262    | FAM21C      | 1784 | 1849 | 7.3315161044  |               |
| NM_015262    | FAM21C      | 2198 | 2305 | 6.74655360369 |               |
| NM_015262    | FAM21C      | 239  | 317  | 6.74655336777 |               |
| NM_015262    | FAM21C      | 4047 | 4084 | 6.6624143943  |               |
| NM_015262    | FAM21C      | 3854 | 3910 | 6.74253600351 |               |
| NM_015262    | FAM21C      | 1476 | 1541 | 7.33151610441 |               |
| NM_015262    | FAM21C      | 653  | 786  | 7.33151610441 |               |

|              |         |      |      |               |
|--------------|---------|------|------|---------------|
| NM_015262    | FAM21C  | 470  | 565  | 8.06848169857 |
| NM_015262    | FAM21C  | 3644 | 3746 | 5.74655359614 |
| NM_015262    | FAM21C  | 2713 | 2850 | 8.33151610441 |
| NM_015262    | FAM21C  | 2373 | 2504 | 8.55390852574 |
| NM_015262    | FAM21C  | 2507 | 2552 | 5.6624143943  |
| NM_015262    | FAM21C  | 876  | 1015 | 8.06848169857 |
| NM_015262    | FAM21C  | 2934 | 3059 | 8.06848169857 |
| NM_001172700 | SHROOM1 | 1607 | 1667 | 9.06385067227 |
| NM_001172700 | SHROOM1 | 3408 | 3456 | 9.05983307232 |
| NM_001172700 | SHROOM1 | 2455 | 2507 | 9.05983307232 |
| NM_001172700 | SHROOM1 | 2578 | 2620 | 8.97971146311 |
| NM_001172700 | SHROOM1 | 1457 | 1513 | 8.97971146311 |
| NM_001172700 | SHROOM1 | 1902 | 2003 | 10.6488064422 |
| NM_181077    | GOLGA8A | 3748 | 3788 | 3.65354031252 |
| NM_181077    | GOLGA8A | 2000 | 2043 | 4.65755790514 |
| NM_181077    | GOLGA8A | 2811 | 2867 | 3.65755791269 |
| NM_181077    | GOLGA8A | 2221 | 2271 | 3.65755791269 |
| NM_181077    | GOLGA8A | 2944 | 2988 | 3.57341870331 |
| NM_181077    | GOLGA8A | 2148 | 2221 | 3.65755790514 |
| NM_181077    | GOLGA8A | 2638 | 2717 | 4.65755791269 |
| NM_181077    | GOLGA8A | 2993 | 3155 | 5.65755791269 |
| NM_007157    | ZXDB    | 1823 | 1902 | 7.67763283076 |
| NM_007157    | ZXDB    | 1569 | 1649 | 7.6737889809  |
| NM_030649    | ACAP3   | 1440 | 1515 | 7.17630184681 |
| NM_030649    | ACAP3   | 745  | 778  | 6.17629512331 |
| NM_030649    | ACAP3   | 1543 | 1637 | 6.17630185436 |
| NM_030649    | ACAP3   | 837  | 889  | 7.17612810404 |
| NM_030649    | ACAP3   | 128  | 207  | 6.17629512331 |
| NM_030649    | ACAP3   | 3318 | 3369 | 6.17630185436 |
| NM_030649    | ACAP3   | 2153 | 2285 | 8.49822994925 |
| NM_030649    | ACAP3   | 1746 | 1858 | 8.49822994925 |
| NM_030640    | DUSP16  | 2031 | 2103 | 5.98008153628 |
| NM_030640    | DUSP16  | 441  | 509  | 7.565044037   |
| NM_030640    | DUSP16  | 3524 | 3581 | 7.64900949607 |
| NM_030640    | DUSP16  | 3343 | 3411 | 6.98008153628 |
| NM_030640    | DUSP16  | 4441 | 4496 | 6.06421401461 |
| NM_030640    | DUSP16  | 1875 | 1913 | 5.98008153628 |
| NM_030640    | DUSP16  | 1215 | 1278 | 7.06404699535 |
| NM_030640    | DUSP16  | 958  | 1101 | 9.38614884055 |
| NM_030640    | DUSP16  | 5246 | 5336 | 6.06422073812 |
| NM_030640    | DUSP16  | 3092 | 3149 | 7.64917651534 |
| NM_030640    | DUSP16  | 1372 | 1454 | 7.64918324639 |
| NM_030640    | DUSP16  | 1594 | 1674 | 7.64918324639 |
| NM_030640    | DUSP16  | 1136 | 1210 | 6.06422074545 |
| NM_030640    | DUSP16  | 5003 | 5104 | 7.64918324617 |
| NM_030640    | DUSP16  | 763  | 878  | 7.06422074567 |
| NM_030641    | APOL6   | 1009 | 1089 | 8.47170268453 |
| NM_030641    | APOL6   | 1483 | 1589 | 9.14080439464 |
| NM_030641    | APOL6   | 131  | 202  | 7.47170268453 |
| NM_030645    | SH3BP5L | 2054 | 2108 | 5.92251733483 |



|              |          |      |      |                   |
|--------------|----------|------|------|-------------------|
| NM_030645    | SH3BP5L  | 1864 | 1904 | 5.91867348497     |
| NM_001009933 | DNASE1L1 |      | 680  | 772 10.2267041663 |
| NM_001199434 | NIP7     | 745  | 865  | 7.39554413996     |
| NM_001199434 | NIP7     | 417  | 483  | 5.58417161773     |
| NM_003819    | PABPC4   | 594  | 651  | 4.17248415675     |
| NM_003819    | PABPC4   | 428  | 463  | 3.58752165603     |
| NM_003819    | PABPC4   | 1490 | 1555 | 4.17248415653     |
| NM_003819    | PABPC4   | 1427 | 1478 | 2.58734790572     |
| NM_003819    | PABPC4   | 465  | 494  | 2.58350405586     |
| NM_003819    | PABPC4   | 2868 | 2936 | 4.17248415653     |
| NM_003819    | PABPC4   | 2040 | 2075 | 2.58752142012     |
| NM_003819    | PABPC4   | 2336 | 2393 | 2.58752164848     |
| NM_003819    | PABPC4   | 2252 | 2304 | 2.58734790572     |
| NM_003819    | PABPC4   | 2588 | 2718 | 4.58752165603     |
| NM_003819    | PABPC4   | 111  | 166  | 2.58350405586     |
| NM_003819    | PABPC4   | 1031 | 1164 | 4.58752165603     |
| NM_003819    | PABPC4   | 2394 | 2478 | 4.17248415676     |
| NM_003819    | PABPC4   | 1179 | 1340 | 6.58752165603     |
| NM_003819    | PABPC4   | 1608 | 1833 | 6.17248415676     |
| NM_003819    | PABPC4   | 1894 | 1998 | 5.75744665748     |
| NM_003818    | CDS2     | 1019 | 1085 | 6.59299485241     |
| NM_003818    | CDS2     | 2480 | 2540 | 5.27106674997     |
| NM_003818    | CDS2     | 1679 | 1732 | 4.26704915735     |
| NM_003818    | CDS2     | 1448 | 1510 | 5.27106002646     |
| NM_003818    | CDS2     | 1734 | 1774 | 5.2708930072      |
| NM_003818    | CDS2     | 2591 | 2641 | 5.26704915735     |
| NM_003818    | CDS2     | 2708 | 2772 | 5.27106002646     |
| NM_003818    | CDS2     | 1132 | 1279 | 8.07842167958     |
| NM_003818    | CDS2     | 3364 | 3400 | 4.18692754813     |
| NM_003818    | CDS2     | 804  | 963  | 7.85602925824     |
| NM_003818    | CDS2     | 1967 | 2049 | 5.26704915735     |
| NM_003818    | CDS2     | 658  | 791  | 7.59299485241     |
| NM_003818    | CDS2     | 319  | 447  | 5.85602925824     |
| NM_003818    | CDS2     | 1576 | 1638 | 5.26704915735     |
| NM_003818    | CDS2     | 516  | 644  | 6.27106675752     |
| NM_003818    | CDS2     | 2355 | 2468 | 6.85602925824     |
| NM_003816    | ADAM9    | 406  | 556  | 7.80910210919     |
| NM_003816    | ADAM9    | 3384 | 3464 | 6.29452893636     |
| NM_003816    | ADAM9    | 10   | 97   | 5.4871740143      |
| NM_003816    | ADAM9    | 2317 | 2381 | 5.48717401429     |
| NM_003816    | ADAM9    | 813  | 941  | 7.57463685555     |
| NM_003816    | ADAM9    | 1613 | 1661 | 4.40303480491     |
| NM_003816    | ADAM9    | 2764 | 2837 | 5.80910210919     |
| NM_003816    | ADAM9    | 3493 | 3583 | 5.07213651502     |
| NM_003816    | ADAM9    | 266  | 402  | 6.4871740143      |
| NM_003816    | ADAM9    | 2992 | 3110 | 6.29452893636     |
| NM_003816    | ADAM9    | 2684 | 2716 | 5.0721362791      |
| NM_003816    | ADAM9    | 561  | 681  | 6.07213651502     |
| NM_003816    | ADAM9    | 686  | 810  | 6.80910210919     |
| NM_003816    | ADAM9    | 3587 | 3701 | 6.65709901574     |

|           |         |      |      |               |
|-----------|---------|------|------|---------------|
| NM_003816 | ADAM9   | 2471 | 2661 | 7.73510152774 |
| NM_003816 | ADAM9   | 2847 | 2986 | 6.80910210919 |
| NM_003816 | ADAM9   | 105  | 225  | 5.07213651502 |
| NM_003816 | ADAM9   | 1673 | 2315 | 10.041762866  |
| NM_003816 | ADAM9   | 943  | 1580 | 9.59569847108 |
| NM_003810 | TNFSF10 | 872  | 941  | 6.38878143176 |
| NM_003810 | TNFSF10 | 224  | 273  | 6.38860768144 |
| NM_003810 | TNFSF10 | 809  | 864  | 5.38476383158 |
| NM_003810 | TNFSF10 | 173  | 222  | 6.97357018216 |
| NM_001679 | ATP1B3  | 1634 | 1686 | 5.98658064137 |
| NM_001679 | ATP1B3  | 14   | 124  | 7.79393556343 |
| NM_001679 | ATP1B3  | 128  | 1531 | 13.0526698318 |
| NM_004289 | NFE2L3  | 1383 | 1442 | 8.14084858289 |
| NM_004289 | NFE2L3  | 1176 | 1224 | 6.55588584625 |
| NM_004289 | NFE2L3  | 2196 | 2273 | 6.551868482   |
| NM_004289 | NFE2L3  | 326  | 396  | 7.55588608217 |
| NM_004289 | NFE2L3  | 840  | 890  | 5.551868482   |
| NM_004289 | NFE2L3  | 894  | 1062 | 9.14084858289 |
| NM_004289 | NFE2L3  | 781  | 826  | 5.47174687279 |
| NM_004289 | NFE2L3  | 1268 | 1358 | 7.55588608217 |
| NM_004289 | NFE2L3  | 2634 | 2740 | 6.551868482   |
| NM_004289 | NFE2L3  | 69   | 131  | 5.55588608217 |
| NM_004289 | NFE2L3  | 2461 | 2557 | 6.55588608217 |
| NM_004289 | NFE2L3  | 2337 | 2403 | 8.36324100423 |
| NM_004289 | NFE2L3  | 1448 | 1734 | 10.1997422719 |
| NM_004289 | NFE2L3  | 1740 | 2131 | 10.6433489234 |
| NM_199245 | VAMP1   | 819  | 904  | 7.9751464006  |
| NM_199245 | VAMP1   | 2971 | 3041 | 7.97916400077 |
| NM_004285 | H6PD    | 5661 | 5719 | 8.48141718111 |
| NM_004285 | H6PD    | 71   | 120  | 9.48125016185 |
| NM_004285 | H6PD    | 6701 | 6748 | 10.0663864053 |
| NM_004285 | H6PD    | 272  | 338  | 10.0663864053 |
| NM_004285 | H6PD    | 6773 | 6824 | 9.48142391217 |
| NM_004285 | H6PD    | 1917 | 1978 | 8.48141718111 |
| NM_004285 | H6PD    | 5481 | 5571 | 8.48142391195 |
| NM_004285 | H6PD    | 5278 | 5376 | 11.0663864129 |
| NM_004285 | H6PD    | 1667 | 1768 | 10.4814239122 |
| NM_004285 | H6PD    | 7299 | 7380 | 9.48142391217 |
| NM_004285 | H6PD    | 6572 | 6612 | 9.39728470278 |
| NM_004285 | H6PD    | 3579 | 3642 | 10.0663864129 |
| NM_004285 | H6PD    | 354  | 435  | 10.0663864129 |
| NM_004285 | H6PD    | 6914 | 6974 | 8.48142391195 |
| NM_004285 | H6PD    | 6984 | 7068 | 9.48125016185 |
| NM_004285 | H6PD    | 2610 | 2763 | 11.8033520071 |
| NM_004285 | H6PD    | 8030 | 8163 | 10.8033520071 |
| NM_004285 | H6PD    | 2179 | 2248 | 9.48142391217 |
| NM_004285 | H6PD    | 6613 | 6663 | 8.39728470278 |
| NM_004285 | H6PD    | 804  | 866  | 8.477406312   |
| NM_004285 | H6PD    | 8437 | 8491 | 8.48142391195 |
| NM_004285 | H6PD    | 868  | 965  | 11.4814239122 |

|           |        |       |       |               |
|-----------|--------|-------|-------|---------------|
| NM_004285 | H6PD   | 4333  | 4406  | 10.4814239122 |
| NM_004285 | H6PD   | 4406  | 4504  | 10.0663864129 |
| NM_004285 | H6PD   | 2801  | 2873  | 9.48142391217 |
| NM_004285 | H6PD   | 5079  | 5210  | 10.4814239122 |
| NM_004285 | H6PD   | 578   | 724   | 9.48142391217 |
| NM_004285 | H6PD   | 4626  | 4677  | 8.477406312   |
| NM_004285 | H6PD   | 3187  | 3428  | 12.5688867534 |
| NM_004285 | H6PD   | 4081  | 4297  | 11.2887788342 |
| NM_004285 | H6PD   | 7904  | 7978  | 8.48141718111 |
| NM_004285 | H6PD   | 4766  | 4845  | 9.48142391217 |
| NM_004284 | CHD1L  | 2601  | 2669  | 4.70892260884 |
| NM_004284 | CHD1L  | 2818  | 2924  | 2.70892260884 |
| NM_004284 | CHD1L  | 981   | 1036  | 3.62478339945 |
| NM_004284 | CHD1L  | 1421  | 1521  | 4.2938783785  |
| NM_004284 | CHD1L  | 2437  | 2524  | 4.70892260884 |
| NM_004284 | CHD1L  | 1273  | 1419  | 3.70892260884 |
| NM_004284 | CHD1L  | 2314  | 2400  | 2.70892260883 |
| NM_004284 | CHD1L  | 1540  | 1665  | 3.70892260129 |
| NM_004284 | CHD1L  | 1176  | 1256  | 2.70892260861 |
| NM_001670 | ARVCF  | 2374  | 2428  | 8.70979650558 |
| NM_001670 | ARVCF  | 1371  | 1427  | 8.71364035543 |
| NM_001670 | ARVCF  | 2176  | 2241  | 9.2947590063  |
| NM_001670 | ARVCF  | 3345  | 3401  | 9.7138140982  |
| NM_001670 | ARVCF  | 1881  | 1968  | 8.71381410574 |
| NM_001677 | ATP1B1 | 2112  | 2191  | 4.62413934014 |
| NM_001677 | ATP1B1 | 1355  | 1499  | 6.32457905828 |
| NM_001677 | ATP1B1 | 75    | 1352  | 9.65756234167 |
| NM_001677 | ATP1B1 | 1507  | 2109  | 7.75342235708 |
| NM_020765 | UBR4   | 1555  | 1631  | 7.71926017353 |
| NM_020765 | UBR4   | 13889 | 13961 | 6.71926017353 |
| NM_020765 | UBR4   | 11926 | 11966 | 4.71908642322 |
| NM_020765 | UBR4   | 8036  | 8102  | 7.04118826842 |
| NM_020765 | UBR4   | 13017 | 13076 | 5.71524257336 |
| NM_020765 | UBR4   | 4937  | 5040  | 7.71926017353 |
| NM_020765 | UBR4   | 6057  | 6140  | 5.71926017353 |
| NM_020765 | UBR4   | 3874  | 3966  | 7.30422267426 |
| NM_020765 | UBR4   | 12431 | 12476 | 4.71926017331 |
| NM_020765 | UBR4   | 12037 | 12096 | 4.71926017353 |
| NM_020765 | UBR4   | 14023 | 14067 | 5.71925993762 |
| NM_020765 | UBR4   | 13963 | 14011 | 6.71926017331 |
| NM_020765 | UBR4   | 2360  | 2450  | 5.71926017331 |
| NM_020765 | UBR4   | 5591  | 5649  | 5.71925344248 |
| NM_020765 | UBR4   | 2552  | 2618  | 4.71524257336 |
| NM_020765 | UBR4   | 14740 | 14817 | 4.71926016598 |
| NM_020765 | UBR4   | 7925  | 8036  | 7.04118826842 |
| NM_020765 | UBR4   | 2668  | 2782  | 7.04118826842 |
| NM_020765 | UBR4   | 4587  | 4641  | 4.71925344248 |
| NM_020765 | UBR4   | 7671  | 7737  | 5.71926017331 |
| NM_020765 | UBR4   | 4794  | 4849  | 5.71926016598 |
| NM_020765 | UBR4   | 12847 | 12915 | 6.30422243834 |

|           |      |       |       |               |
|-----------|------|-------|-------|---------------|
| NM_020765 | UBR4 | 15683 | 15742 | 5.71925993762 |
| NM_020765 | UBR4 | 11070 | 11154 | 6.71926017353 |
| NM_020765 | UBR4 | 14106 | 14143 | 4.63512096415 |
| NM_020765 | UBR4 | 14962 | 15040 | 6.71926017353 |
| NM_020765 | UBR4 | 13699 | 13762 | 6.30020507408 |
| NM_020765 | UBR4 | 12649 | 12718 | 5.71925344248 |
| NM_020765 | UBR4 | 4655  | 4779  | 7.52661509559 |
| NM_020765 | UBR4 | 6940  | 6983  | 4.71908642322 |
| NM_020765 | UBR4 | 5400  | 5460  | 6.3042159432  |
| NM_020765 | UBR4 | 11312 | 11376 | 4.71926017331 |
| NM_020765 | UBR4 | 3238  | 3371  | 7.88918517498 |
| NM_020765 | UBR4 | 11396 | 11459 | 4.71926017353 |
| NM_020765 | UBR4 | 12289 | 12360 | 6.30020507408 |
| NM_020765 | UBR4 | 15213 | 15323 | 6.30422267426 |
| NM_020765 | UBR4 | 13582 | 13698 | 7.30422267426 |
| NM_020765 | UBR4 | 7319  | 7396  | 7.30422267426 |
| NM_020765 | UBR4 | 5549  | 5583  | 4.71524257336 |
| NM_020765 | UBR4 | 13766 | 13812 | 4.71908642322 |
| NM_020765 | UBR4 | 2075  | 2195  | 6.71926017353 |
| NM_020765 | UBR4 | 8896  | 9003  | 5.71926017353 |
| NM_020765 | UBR4 | 9391  | 9427  | 4.71925344248 |
| NM_020765 | UBR4 | 7015  | 7144  | 6.71926017353 |
| NM_020765 | UBR4 | 8413  | 8462  | 6.30422243834 |
| NM_020765 | UBR4 | 1707  | 1804  | 7.52661509559 |
| NM_020765 | UBR4 | 12557 | 12631 | 6.3042159432  |
| NM_020765 | UBR4 | 9269  | 9357  | 5.71926017353 |
| NM_020765 | UBR4 | 1896  | 2044  | 8.41969989168 |
| NM_020765 | UBR4 | 5474  | 5522  | 4.71925344248 |
| NM_020765 | UBR4 | 2977  | 3100  | 7.52661509559 |
| NM_020765 | UBR4 | 3410  | 3543  | 7.30422267426 |
| NM_020765 | UBR4 | 5890  | 6042  | 7.04118826842 |
| NM_020765 | UBR4 | 15488 | 15560 | 6.71926017353 |
| NM_020765 | UBR4 | 3545  | 3717  | 8.62615076914 |
| NM_020765 | UBR4 | 331   | 452   | 7.52661509559 |
| NM_020765 | UBR4 | 13422 | 13499 | 4.71926016598 |
| NM_020765 | UBR4 | 6853  | 6930  | 6.30422267426 |
| NM_020765 | UBR4 | 11158 | 11237 | 7.30422267426 |
| NM_020765 | UBR4 | 13146 | 13307 | 7.04118826842 |
| NM_020765 | UBR4 | 5118  | 5279  | 6.30422267426 |
| NM_020765 | UBR4 | 3106  | 3237  | 7.71926017353 |
| NM_020765 | UBR4 | 2783  | 2883  | 7.71926017353 |
| NM_020765 | UBR4 | 6574  | 6686  | 4.71926017353 |
| NM_020765 | UBR4 | 9018  | 9132  | 6.30422267426 |
| NM_020765 | UBR4 | 1218  | 1338  | 7.04118826842 |
| NM_020765 | UBR4 | 10338 | 10417 | 4.71926016598 |
| NM_020765 | UBR4 | 5735  | 5853  | 7.71926017353 |
| NM_020765 | UBR4 | 11471 | 11547 | 5.71926017331 |
| NM_020765 | UBR4 | 10460 | 10597 | 7.88918517498 |
| NM_020765 | UBR4 | 6379  | 6459  | 5.71926017353 |
| NM_020765 | UBR4 | 11569 | 11636 | 4.71926017331 |

|           |       |       |       |               |
|-----------|-------|-------|-------|---------------|
| NM_020765 | UBR4  | 10934 | 11046 | 6.71926017353 |
| NM_020765 | UBR4  | 9512  | 9687  | 7.71926017353 |
| NM_020765 | UBR4  | 7404  | 7561  | 7.04118826842 |
| NM_020765 | UBR4  | 933   | 1129  | 7.30422267426 |
| NM_020765 | UBR4  | 577   | 672   | 5.71925344248 |
| NM_020765 | UBR4  | 3966  | 4150  | 7.52661509559 |
| NM_020765 | UBR4  | 14831 | 14915 | 5.71926017353 |
| NM_020765 | UBR4  | 6259  | 6373  | 7.04118826842 |
| NM_020765 | UBR4  | 4182  | 4566  | 9.11157759631 |
| NM_020765 | UBR4  | 7795  | 7908  | 6.30422267426 |
| NM_020765 | UBR4  | 8119  | 8358  | 8.17869179217 |
| NM_020765 | UBR4  | 10124 | 10323 | 7.52661509559 |
| NM_020765 | UBR4  | 3780  | 3862  | 5.71926017353 |
| NM_020765 | UBR4  | 9168  | 9241  | 5.71925993762 |
| NM_020765 | UBR4  | 6140  | 6209  | 6.30020507408 |
| NM_020765 | UBR4  | 10714 | 10818 | 5.71926017353 |
| NM_020765 | UBR4  | 9798  | 9995  | 7.30422267426 |
| NM_020765 | UBR4  | 8559  | 8748  | 6.71926017353 |
| NM_004283 | RAB3D | 3015  | 3054  | 10.7956350731 |
| NM_004283 | RAB3D | 960   | 1009  | 10.8797675515 |
| NM_004283 | RAB3D | 2461  | 2498  | 9.87575668234 |
| NM_004283 | RAB3D | 1014  | 1054  | 9.87976755146 |
| NM_004283 | RAB3D | 2060  | 2109  | 9.8797740466  |
| NM_004283 | RAB3D | 2662  | 2728  | 11.4607191831 |
| NM_004283 | RAB3D | 1418  | 1478  | 9.87976755146 |
| NM_004283 | RAB3D | 604   | 724   | 11.4647367832 |
| NM_004283 | RAB3D | 2161  | 2213  | 9.79563507313 |
| NM_004283 | RAB3D | 4076  | 4209  | 12.2017023774 |
| NM_004283 | RAB3D | 3930  | 4006  | 12.2017023774 |
| NM_004283 | RAB3D | 1599  | 1704  | 12.2017023774 |
| NM_004283 | RAB3D | 1234  | 1332  | 10.8797742825 |
| NM_004283 | RAB3D | 293   | 441   | 12.6871292046 |
| NM_004283 | RAB3D | 3493  | 3595  | 10.8797740466 |
| NM_004283 | RAB3D | 3364  | 3490  | 11.4647367832 |
| NM_000108 | DLD   | 500   | 543   | 3.84664276061 |
| NM_000108 | DLD   | 1192  | 1229  | 5.43160526133 |
| NM_000108 | DLD   | 1754  | 1867  | 4.93078197    |
| NM_000108 | DLD   | 1652  | 1744  | 5.51574447072 |
| NM_000108 | DLD   | 105   | 184   | 4.93078197    |
| NM_000108 | DLD   | 2004  | 2065  | 3.93077523894 |
| NM_000108 | DLD   | 2283  | 2333  | 4.93077523894 |
| NM_000108 | DLD   | 1241  | 1304  | 5.93078197    |
| NM_000108 | DLD   | 198   | 250   | 5.92676436982 |
| NM_000108 | DLD   | 1548  | 1607  | 3.93078196245 |
| NM_000108 | DLD   | 1053  | 1171  | 6.51574447072 |
| NM_000108 | DLD   | 280   | 444   | 6.93078197    |
| NM_000108 | DLD   | 1430  | 1548  | 6.25271006488 |
| NM_000108 | DLD   | 1877  | 1950  | 5.51574447072 |
| NM_000108 | DLD   | 806   | 947   | 6.25271006488 |
| NM_000100 | CSTB  | 201   | 313   | 5.73514665779 |

|              |          |      |      |                   |
|--------------|----------|------|------|-------------------|
| NM_000100    | CSTB     | 314  | 445  | 5.56522165635     |
| NM_000100    | CSTB     | 445  | 570  | 4.56522165635     |
| NM_024006    | VKORC1   | 322  | 367  | 5.65226138498     |
| NM_024006    | VKORC1   | 469  | 722  | 10.1287180171     |
| NM_024006    | VKORC1   | 15   | 117  | 6.32136309508     |
| NM_024006    | VKORC1   | 371  | 461  | 6.32136309508     |
| NM_024006    | VKORC1   | 180  | 314  | 8.195832213       |
| NM_024006    | VKORC1   | 740  | 820  | 6.32135636403     |
| NM_024006    | VKORC1   | 821  | 985  | 8.64329118997     |
| NM_024003    | L1CAM    | 2914 | 2980 | 11.8482196948     |
| NM_024003    | L1CAM    | 3612 | 3661 | 10.8482197023     |
| NM_024003    | L1CAM    | 2639 | 2697 | 9.848045952       |
| NM_024003    | L1CAM    | 1246 | 1319 | 11.8482197023     |
| NM_024003    | L1CAM    | 2481 | 2576 | 11.433182203      |
| NM_024003    | L1CAM    | 199  | 264  | 9.8482194664      |
| NM_024003    | L1CAM    | 3963 | 4010 | 10.8482197023     |
| NM_024003    | L1CAM    | 362  | 423  | 9.84821969477     |
| NM_024003    | L1CAM    | 3109 | 3180 | 12.433182203      |
| NM_024003    | L1CAM    | 4276 | 4360 | 11.433182203      |
| NM_024003    | L1CAM    | 2993 | 3073 | 12.1701477972     |
| NM_024003    | L1CAM    | 3196 | 3226 | 9.76408049294     |
| NM_024003    | L1CAM    | 4061 | 4220 | 12.1701477972     |
| NM_024003    | L1CAM    | 3302 | 3443 | 13.1701477972     |
| NM_024003    | L1CAM    | 78   | 182  | 12.6555746244     |
| NM_024003    | L1CAM    | 4615 | 4918 | 13.7551102979     |
| NM_024003    | L1CAM    | 2250 | 2363 | 9.84821970232     |
| NM_024003    | L1CAM    | 3448 | 3611 | 12.6555746244     |
| NM_024003    | L1CAM    | 952  | 1112 | 12.8482197023     |
| NM_024003    | L1CAM    | 1125 | 1240 | 11.8482197023     |
| NM_024003    | L1CAM    | 2032 | 2178 | 13.433182203      |
| NM_024003    | L1CAM    | 529  | 681  | 12.1701477972     |
| NM_024003    | L1CAM    | 1757 | 1994 | 11.8482197023     |
| NM_024003    | L1CAM    | 1357 | 1710 | 14.5486594205     |
| NM_024003    | L1CAM    | 682  | 804  | 11.433182203      |
| NM_001142603 | KIAA0141 |      | 101  | 173 7.60839003737 |
| NM_001142603 | KIAA0141 |      | 438  | 538 7.60839676842 |
| NM_005610    | RBBP4    | 2004 | 2056 | 4.86333051415     |
| NM_005610    | RBBP4    | 1023 | 1111 | 7.75482464559     |
| NM_005610    | RBBP4    | 3822 | 3881 | 5.94345212336     |
| NM_005610    | RBBP4    | 1747 | 1818 | 6.53243222426     |
| NM_005610    | RBBP4    | 1499 | 1544 | 5.94729597322     |
| NM_005610    | RBBP4    | 332  | 395  | 6.94746972353     |
| NM_005610    | RBBP4    | 7673 | 7722 | 4.86333051415     |
| NM_005610    | RBBP4    | 5523 | 5594 | 4.94746972353     |
| NM_005610    | RBBP4    | 814  | 1018 | 9.11739472498     |
| NM_005610    | RBBP4    | 170  | 289  | 7.26939781842     |
| NM_005610    | RBBP4    | 1142 | 1318 | 8.85436031914     |
| NM_005610    | RBBP4    | 1332 | 1489 | 8.40690134217     |
| NM_005610    | RBBP4    | 432  | 789  | 9.11739472498     |
| NM_173547    | TRIM65   | 2173 | 2237 | 10.3795159118     |

|              |       |      |      |               |
|--------------|-------|------|------|---------------|
| NM_173542    | PLBD2 | 936  | 1018 | 8.70609863686 |
| NM_173542    | PLBD2 | 2259 | 2307 | 8.12096238582 |
| NM_173542    | PLBD2 | 1905 | 1974 | 8.12113613592 |
| NM_173542    | PLBD2 | 651  | 785  | 10.5805677548 |
| NM_173542    | PLBD2 | 1031 | 1083 | 7.12096238582 |
| NM_173542    | PLBD2 | 2016 | 2105 | 9.70609863686 |
| NM_173542    | PLBD2 | 378  | 546  | 8.12113613614 |
| NM_173542    | PLBD2 | 1316 | 1538 | 10.7060986369 |
| NM_173542    | PLBD2 | 224  | 303  | 8.12113613614 |
| NM_173542    | PLBD2 | 810  | 872  | 8.70609862931 |
| NM_173540    | FUT11 | 1371 | 1433 | 6.26371046813 |
| NM_173540    | FUT11 | 992  | 1072 | 8.84867273293 |
| NM_001146277 | NCEH1 | 777  | 850  | 9.88545505179 |
| NM_001146277 | NCEH1 | 3862 | 3950 | 8.88545505179 |
| NM_001146277 | NCEH1 | 2980 | 3051 | 6.88545505179 |
| NM_001146277 | NCEH1 | 592  | 646  | 9.47041755251 |
| NM_001146277 | NCEH1 | 1833 | 1869 | 6.8013158424  |
| NM_001146277 | NCEH1 | 4104 | 4146 | 8.88143745162 |
| NM_001146277 | NCEH1 | 881  | 921  | 6.88545481587 |
| NM_001146277 | NCEH1 | 2012 | 2092 | 7.88545505179 |
| NM_001146277 | NCEH1 | 232  | 275  | 9.20738314645 |
| NM_001146277 | NCEH1 | 279  | 359  | 10.3448866704 |
| NM_001146277 | NCEH1 | 1175 | 1284 | 9.69280997385 |
| NM_001146277 | NCEH1 | 956  | 1144 | 10.3448866704 |
| NM_001146277 | NCEH1 | 3200 | 3227 | 6.88528130147 |
| NM_001146277 | NCEH1 | 1789 | 1823 | 6.8013158424  |
| NM_001146277 | NCEH1 | 365  | 541  | 10.4704175525 |
| NM_001146277 | NCEH1 | 668  | 754  | 8.88545505179 |
| NM_001146277 | NCEH1 | 1886 | 2001 | 9.47041755251 |
| NM_001146277 | NCEH1 | 3593 | 3660 | 8.46639995234 |
| NM_001146277 | NCEH1 | 3494 | 3574 | 7.88545504424 |
| NM_001146277 | NCEH1 | 1294 | 1559 | 11.2777724746 |
| NM_006289    | TLN1  | 5262 | 5335 | 6.56527796348 |
| NM_006289    | TLN1  | 6661 | 6717 | 6.56510421317 |
| NM_006289    | TLN1  | 483  | 519  | 5.98030873171 |
| NM_006289    | TLN1  | 6190 | 6265 | 4.98031522684 |
| NM_006289    | TLN1  | 1094 | 1185 | 6.56126036331 |
| NM_006289    | TLN1  | 6845 | 6936 | 4.98031546276 |
| NM_006289    | TLN1  | 7498 | 7575 | 5.89617625338 |
| NM_006289    | TLN1  | 2565 | 2621 | 5.98014171244 |
| NM_006289    | TLN1  | 2381 | 2469 | 5.98031546276 |
| NM_006289    | TLN1  | 6099 | 6152 | 5.98031546276 |
| NM_006289    | TLN1  | 5335 | 5386 | 5.97629786259 |
| NM_006289    | TLN1  | 5904 | 5973 | 5.98031546276 |
| NM_006289    | TLN1  | 5412 | 5470 | 4.97629786259 |
| NM_006289    | TLN1  | 932  | 1032 | 5.98031546276 |
| NM_006289    | TLN1  | 1706 | 1748 | 4.97629786259 |
| NM_006289    | TLN1  | 5030 | 5112 | 7.30224355765 |
| NM_006289    | TLN1  | 5112 | 5193 | 5.98031546276 |
| NM_006289    | TLN1  | 4821 | 4916 | 7.56527796348 |

|           |       |      |      |               |
|-----------|-------|------|------|---------------|
| NM_006289 | TLN1  | 7319 | 7398 | 5.98031545521 |
| NM_006289 | TLN1  | 3361 | 3528 | 8.56527796348 |
| NM_006289 | TLN1  | 3700 | 3774 | 6.56527795593 |
| NM_006289 | TLN1  | 5491 | 5536 | 5.89617625338 |
| NM_006289 | TLN1  | 1595 | 1636 | 4.97629786259 |
| NM_006289 | TLN1  | 6397 | 6455 | 5.97629786259 |
| NM_006289 | TLN1  | 4685 | 4745 | 7.56527796348 |
| NM_006289 | TLN1  | 6764 | 6828 | 4.89617625338 |
| NM_006289 | TLN1  | 7034 | 7142 | 8.15024046421 |
| NM_006289 | TLN1  | 4022 | 4112 | 5.98031546276 |
| NM_006289 | TLN1  | 4133 | 4224 | 7.56527796348 |
| NM_006289 | TLN1  | 2873 | 2988 | 7.30224355765 |
| NM_006289 | TLN1  | 2265 | 2324 | 4.89617625338 |
| NM_006289 | TLN1  | 7825 | 7900 | 6.98031546276 |
| NM_006289 | TLN1  | 7684 | 7734 | 4.98030873171 |
| NM_006289 | TLN1  | 3532 | 3635 | 6.56527796348 |
| NM_006289 | TLN1  | 7166 | 7276 | 6.98031546276 |
| NM_006289 | TLN1  | 1450 | 1594 | 7.78767038482 |
| NM_006289 | TLN1  | 1255 | 1442 | 8.15024046421 |
| NM_006289 | TLN1  | 4444 | 4644 | 8.30224355765 |
| NM_006289 | TLN1  | 524  | 840  | 8.88720605837 |
| NM_006289 | TLN1  | 2017 | 2096 | 6.56527796326 |
| NM_006289 | TLN1  | 2721 | 2801 | 4.98031546254 |
| NM_006289 | TLN1  | 1770 | 1926 | 5.98031546276 |
| NM_006289 | TLN1  | 5538 | 5671 | 7.56527796348 |
| NM_006289 | TLN1  | 4293 | 4388 | 5.98031546254 |
| NM_006283 | TACC1 | 6364 | 6454 | 7.34808203991 |
| NM_006283 | TACC1 | 7320 | 7377 | 5.34406443974 |
| NM_006283 | TACC1 | 3435 | 3496 | 5.26394283053 |
| NM_006283 | TACC1 | 4287 | 4373 | 6.34406443974 |
| NM_006283 | TACC1 | 3150 | 3208 | 7.67001013458 |
| NM_006283 | TACC1 | 7609 | 7659 | 6.34808203991 |
| NM_006283 | TACC1 | 4668 | 4697 | 6.84890533125 |
| NM_006283 | TACC1 | 7149 | 7204 | 7.67001012725 |
| NM_006283 | TACC1 | 3519 | 3561 | 5.3479082896  |
| NM_006283 | TACC1 | 6061 | 6121 | 5.34807530886 |
| NM_006283 | TACC1 | 1098 | 1141 | 6.26394283053 |
| NM_006283 | TACC1 | 619  | 656  | 5.26394283053 |
| NM_006283 | TACC1 | 7065 | 7128 | 5.34808203236 |
| NM_006283 | TACC1 | 4557 | 4625 | 6.34807530886 |
| NM_006283 | TACC1 | 3317 | 3406 | 5.34807530886 |
| NM_006283 | TACC1 | 2732 | 2853 | 6.34808203991 |
| NM_014657 | TTI1  | 2266 | 2370 | 8.47145503427 |
| NM_014657 | TTI1  | 889  | 943  | 8.88631879078 |
| NM_014657 | TTI1  | 1090 | 1171 | 8.88649253354 |
| NM_014657 | TTI1  | 1689 | 1757 | 8.47145503427 |
| NM_014657 | TTI1  | 1037 | 1069 | 7.80235333171 |
| NM_014657 | TTI1  | 470  | 532  | 8.46743744164 |
| NM_014657 | TTI1  | 1206 | 1260 | 6.88247494092 |
| NM_014657 | TTI1  | 2561 | 2650 | 6.88648581004 |



|              |       |      |      |                 |
|--------------|-------|------|------|-----------------|
| NM_014657    | TTI1  | 1844 | 1898 | 7.88247494092   |
| NM_014657    | TTI1  | 284  | 313  | 8.46743744164   |
| NM_014657    | TTI1  | 2113 | 2203 | 8.47145504159   |
| NM_014657    | TTI1  | 3607 | 3650 | 7.88648581004   |
| NM_014657    | TTI1  | 754  | 804  | 6.88648581004   |
| NM_014657    | TTI1  | 3687 | 3733 | 7.88247494092   |
| NM_014657    | TTI1  | 537  | 590  | 6.88649230517   |
| NM_014657    | TTI1  | 1413 | 1597 | 8.47145504181   |
| NM_006280    | SSR4  | 545  | 632  | 7.37085418834   |
| NM_006280    | SSR4  | 516  | 543  | 5.7857179373    |
| NM_006280    | SSR4  | 128  | 453  | 10.3708541883   |
| NM_006280    | SSR4  | 59   | 111  | 6.70175247823   |
| NM_006285    | TESK1 | 1054 | 1165 | 10.3921565665   |
| NM_006284    | TAF10 | 395  | 520  | 9.25937426873   |
| NM_001145076 | EML4  | 2098 | 2224 | 3.71600048352   |
| NM_001145076 | EML4  | 3019 | 3088 | 1.59650566593   |
| NM_001145076 | EML4  | 1622 | 1678 | 2.01556076538   |
| NM_001145076 | EML4  | 4693 | 4761 | 1.01555403433   |
| NM_001145076 | EML4  | 5016 | 5062 | 0.0153870150647 |
| NM_001145076 | EML4  | 1476 | 1525 | 0.0155607653766 |
| NM_001145076 | EML4  | 492  | 532  | 1.01154316521   |
| NM_001145076 | EML4  | 4456 | 4504 | 1.6005232661    |
| NM_001145076 | EML4  | 1287 | 1347 | 1.01556076538   |
| NM_001145076 | EML4  | 4393 | 4447 | 2.01556076538   |
| NM_001145076 | EML4  | 1223 | 1287 | 1.6005232661    |
| NM_001145076 | EML4  | 545  | 593  | 1.01556076516   |
| NM_001145076 | EML4  | 3139 | 3199 | 0.0153870150647 |
| NM_001145076 | EML4  | 664  | 752  | 0.0155605294639 |
| NM_001145076 | EML4  | 2489 | 2550 | 2.01556075783   |
| NM_001145076 | EML4  | 406  | 443  | 1.01538701506   |
| NM_001145076 | EML4  | 3669 | 3757 | 2.33748886027   |
| NM_001145076 | EML4  | 259  | 348  | 3.18548576682   |
| NM_001145076 | EML4  | 1366 | 1454 | 2.33748886027   |
| NM_001145076 | EML4  | 5193 | 5296 | 0.0155607653827 |
| NM_001145076 | EML4  | 3592 | 3656 | 1.01538701506   |
| NM_001145076 | EML4  | 2036 | 2082 | 1.59650566593   |
| NM_001145076 | EML4  | 2916 | 2956 | 0.0115431652097 |
| NM_001145076 | EML4  | 3870 | 3903 | 0.931421555999  |
| NM_001145076 | EML4  | 943  | 1216 | 4.26348827883   |
| NM_001145076 | EML4  | 4212 | 4338 | 0.0155607578334 |
| NM_001145076 | EML4  | 2265 | 2473 | 4.10302360663   |
| NM_001145076 | EML4  | 1530 | 1597 | 1.01538701506   |
| NM_001145076 | EML4  | 1681 | 1827 | 3.01556076538   |
| NM_001145076 | EML4  | 773  | 939  | 2.82291568744   |
| NM_001145076 | EML4  | 3328 | 3378 | 0.931421555999  |
| NM_001145076 | EML4  | 3392 | 3466 | 2.6005232661    |
| NM_001145076 | EML4  | 2662 | 2889 | 2.33748886027   |
| NM_001145076 | EML4  | 163  | 252  | 1.01555403433   |
| NM_001145076 | EML4  | 1837 | 2018 | 2.82291568744   |
| NM_001042550 | SMC2  | 3690 | 3750 | 4.85907087406   |

|              |         |      |      |               |
|--------------|---------|------|------|---------------|
| NM_001042550 | SMC2    | 831  | 868  | 4.77894926485 |
| NM_001042550 | SMC2    | 2661 | 2752 | 4.86291472392 |
| NM_001042550 | SMC2    | 5596 | 5662 | 6.86308847424 |
| NM_001042550 | SMC2    | 3633 | 3687 | 6.44805097496 |
| NM_001042550 | SMC2    | 467  | 503  | 4.85907087406 |
| NM_001042550 | SMC2    | 1011 | 1047 | 4.86291472392 |
| NM_001042550 | SMC2    | 1966 | 2036 | 6.44805097495 |
| NM_001042550 | SMC2    | 2773 | 2866 | 5.85907087406 |
| NM_001042550 | SMC2    | 3534 | 3582 | 5.86308174318 |
| NM_001042550 | SMC2    | 1390 | 1486 | 4.86308847424 |
| NM_001042550 | SMC2    | 3137 | 3197 | 6.44805096741 |
| NM_001042550 | SMC2    | 2270 | 2355 | 6.86308847424 |
| NM_001042550 | SMC2    | 3271 | 3400 | 7.18501656912 |
| NM_001042550 | SMC2    | 2372 | 2450 | 4.86308847424 |
| NM_001042550 | SMC2    | 2053 | 2243 | 6.86308847424 |
| NM_001042550 | SMC2    | 1674 | 1761 | 4.86308847423 |
| NM_001042550 | SMC2    | 3963 | 4059 | 6.86308847424 |
| NM_001042550 | SMC2    | 1796 | 1951 | 6.86308847424 |
| NM_001002909 | GPATCH8 | 5033 | 5089 | 6.0978704073  |
| NM_001002909 | GPATCH8 | 2935 | 3012 | 5.09804415762 |
| NM_001002909 | GPATCH8 | 218  | 281  | 6.09402655745 |
| NM_001002909 | GPATCH8 | 5610 | 5655 | 6.09402655745 |
| NM_001002909 | GPATCH8 | 1572 | 1640 | 5.09803742657 |
| NM_001002909 | GPATCH8 | 5469 | 5561 | 5.09803742657 |
| NM_001002909 | GPATCH8 | 996  | 1051 | 5.01390494824 |
| NM_001002909 | GPATCH8 | 6122 | 6225 | 6.68300665834 |
| NM_001042559 | EIF4G2  | 113  | 148  | 2.50976315427 |
| NM_001042559 | EIF4G2  | 447  | 495  | 3.50591930441 |
| NM_001042559 | EIF4G2  | 928  | 981  | 3.50993690458 |
| NM_001042559 | EIF4G2  | 496  | 533  | 3.50591930441 |
| NM_001042559 | EIF4G2  | 3310 | 3443 | 5.50993690458 |
| NM_001042559 | EIF4G2  | 249  | 370  | 4.09489940531 |
| NM_001042559 | EIF4G2  | 1812 | 1874 | 2.50993017353 |
| NM_001042559 | EIF4G2  | 541  | 681  | 5.31729182664 |
| NM_001042559 | EIF4G2  | 2842 | 2919 | 4.50993689704 |
| NM_001042559 | EIF4G2  | 1896 | 2135 | 6.75786441803 |
| NM_001042559 | EIF4G2  | 998  | 1089 | 5.50993690458 |
| NM_001042559 | EIF4G2  | 3464 | 3559 | 5.31729182664 |
| NM_001042559 | EIF4G2  | 2404 | 2654 | 6.31729182664 |
| NM_001042559 | EIF4G2  | 3611 | 3685 | 4.83186499947 |
| NM_001042559 | EIF4G2  | 687  | 928  | 6.59739974584 |
| NM_001042559 | EIF4G2  | 2940 | 3026 | 4.50993690458 |
| NM_001042559 | EIF4G2  | 3144 | 3196 | 2.50591930441 |
| NM_001042559 | EIF4G2  | 1337 | 1661 | 6.59739974584 |
| NM_001042559 | EIF4G2  | 2256 | 2403 | 4.83186499947 |
| NM_001042559 | EIF4G2  | 1144 | 1337 | 5.83186499947 |
| NM_020202    | NIT2    | 112  | 160  | 6.54562454084 |
| NM_020202    | NIT2    | 853  | 893  | 8.05046543235 |
| NM_020202    | NIT2    | 463  | 603  | 7.54964214079 |
| NM_020202    | NIT2    | 306  | 384  | 8.54964214102 |

|              |              |      |      |                |
|--------------|--------------|------|------|----------------|
| NM_001100427 | RAP1GDS1     | 2008 | 2063 | 3.83065129113  |
| NM_001100427 | RAP1GDS1     | 1513 | 1564 | 3.83449514099  |
| NM_001100424 | SPATS2L 700  | 790  |      | 4.37329329534  |
| NM_001100424 | SPATS2L 1915 | 1973 |      | 3.04734760028  |
| NM_001100424 | SPATS2L 802  | 849  |      | 3.0513584694   |
| NM_001100424 | SPATS2L 1827 | 1887 |      | 4.05136520045  |
| NM_001100424 | SPATS2L 861  | 986  |      | 5.22129020189  |
| NM_001100424 | SPATS2L 4896 | 4982 |      | 3.04734760028  |
| NM_001100424 | SPATS2L 2808 | 2844 |      | 2.05136520023  |
| NM_001100424 | SPATS2L 311  | 470  |      | 5.85872012251  |
| NM_001100424 | SPATS2L 2232 | 2333 |      | 5.37329329534  |
| NM_001100424 | SPATS2L 1973 | 2200 |      | 6.2992927139   |
| NM_001100424 | SPATS2L 487  | 571  |      | 3.63632770117  |
| NM_001100424 | SPATS2L 1051 | 1401 |      | 6.05136520045  |
| NM_014077    | FAM32A 272   | 331  |      | 2.88275412021  |
| NM_014077    | FAM32A 481   | 565  |      | 3.88677172039  |
| NM_014077    | FAM32A 1312  | 1370 |      | 3.88676498933  |
| NM_014077    | FAM32A 653   | 705  |      | 2.88275412021  |
| NM_014077    | FAM32A 576   | 649  |      | 4.47172749006  |
| NM_005410    | SEPP1 336    | 389  |      | 2.21719836129  |
| NM_005410    | SEPP1 205    | 291  |      | 3.95818155562  |
| NM_005410    | SEPP1 449    | 503  |      | 2.9581815554   |
| NM_005410    | SEPP1 1023   | 1059 |      | 0.552114251353 |
| NM_005410    | SEPP1 507    | 542  |      | 0.632235860564 |
| NM_005410    | SEPP1 545    | 791  |      | 4.54314405635  |
| NM_005410    | SEPP1 1066   | 1121 |      | 1.63625346074  |
| NM_005410    | SEPP1 58     | 112  |      | 0.632235860564 |
| NM_005415    | SLC20A1 2126 | 2203 |      | 6.71573656499  |
| NM_005415    | SLC20A1 457  | 559  |      | 8.20116339216  |
| NM_005415    | SLC20A1 1241 | 1375 |      | 8.78612589288  |
| NM_005415    | SLC20A1 3057 | 3147 |      | 6.97877097082  |
| NM_005415    | SLC20A1 2218 | 2527 |      | 10.1751681836  |
| NM_005415    | SLC20A1 1108 | 1240 |      | 8.30069906571  |
| NM_005415    | SLC20A1 84   | 200  |      | 6.71573656499  |
| NM_005415    | SLC20A1 1790 | 2107 |      | 9.20116339216  |
| NM_005415    | SLC20A1 203  | 422  |      | 8.71573656499  |
| NM_005415    | SLC20A1 2682 | 2773 |      | 5.39380846255  |
| NM_005415    | SLC20A1 1383 | 1778 |      | 8.71573656499  |
| NM_005415    | SLC20A1 574  | 1097 |      | 10.733658473   |
| NM_005415    | SLC20A1 2784 | 2989 |      | 8.91737042616  |
| NM_005415    | SLC20A1 2527 | 2680 |      | 8.3938084701   |
| NM_005415    | SLC20A1 3183 | 3354 |      | 7.3938084701   |
| NM_014078    | MRPL13 778   | 873  |      | 5.654938429    |
| NM_014078    | MRPL13 447   | 583  |      | 6.46229358697  |
| NM_014078    | MRPL13 313   | 368  |      | 3.6547649146   |
| NM_001035247 | UFD1L 676    | 737  |      | 8.1960216933   |
| NM_001035247 | UFD1L 232    | 264  |      | 6.87007599824  |
| NM_001035247 | UFD1L 164    | 222  |      | 6.87409359819  |
| NM_001035247 | UFD1L 265    | 447  |      | 10.0440185999  |
| NM_001035247 | UFD1L 45     | 123  |      | 5.8740933625   |

|              |        |      |      |               |
|--------------|--------|------|------|---------------|
| NM_001035247 | UFD1L  | 746  | 973  | 8.87409359842 |
| NM_001035247 | UFD1L  | 490  | 658  | 9.68144852047 |
| NM_006468    | POLR3C | 935  | 994  | 7.30511032778 |
| NM_006468    | POLR3C | 124  | 197  | 7.30511032778 |
| NM_006468    | POLR3C | 714  | 794  | 5.71613695794 |
| NM_006468    | POLR3C | 1232 | 1292 | 7.22097784945 |
| NM_003107    | SOX4   | 2273 | 2314 | 10.9873554583 |
| NM_003107    | SOX4   | 4271 | 4321 | 11.9911993082 |
| NM_003107    | SOX4   | 86   | 136  | 10.9913730585 |
| NM_003107    | SOX4   | 4071 | 4121 | 10.9913663274 |
| NM_003107    | SOX4   | 1675 | 1717 | 12.4921963498 |
| NM_003107    | SOX4   | 3127 | 3182 | 10.9072338491 |
| NM_003107    | SOX4   | 4660 | 4724 | 13.3133011534 |
| NM_003107    | SOX4   | 2473 | 2529 | 10.9072338491 |
| NM_003107    | SOX4   | 272  | 379  | 13.7987279805 |
| NM_003107    | SOX4   | 4367 | 4404 | 10.9072338491 |
| NM_003107    | SOX4   | 3275 | 3409 | 13.9913730585 |
| NM_003107    | SOX4   | 2750 | 2866 | 10.9913730585 |
| NM_003107    | SOX4   | 1945 | 2188 | 14.3133011534 |
| NM_003107    | SOX4   | 4493 | 4599 | 12.9913730585 |
| NM_003107    | SOX4   | 505  | 653  | 12.5763355592 |
| NM_006466    | POLR3F | 1745 | 1813 | 7.68843133295 |
| NM_003105    | SORL1  | 3422 | 3454 | 4.47904187913 |
| NM_003105    | SORL1  | 777  | 854  | 3.47503101001 |
| NM_003105    | SORL1  | 2963 | 3013 | 3.47904187913 |
| NM_003105    | SORL1  | 3933 | 4025 | 4.47904187913 |
| NM_003105    | SORL1  | 3511 | 3572 | 3.47887485987 |
| NM_003104    | SORD   | 771  | 819  | 6.05255903564 |
| NM_003104    | SORD   | 207  | 273  | 6.05255927156 |
| NM_003104    | SORD   | 849  | 915  | 4.46759677083 |
| NM_003104    | SORD   | 685  | 769  | 5.46759677062 |
| NM_003104    | SORD   | 1730 | 1786 | 5.46742302052 |
| NM_003104    | SORD   | 1219 | 1353 | 6.46759677084 |
| NM_003104    | SORD   | 1888 | 1960 | 5.46759676329 |
| NM_003104    | SORD   | 481  | 664  | 7.63752177228 |
| NM_003104    | SORD   | 969  | 1180 | 7.46759677084 |
| NM_003104    | SORD   | 2254 | 2419 | 7.05255927156 |
| NM_003104    | SORD   | 2130 | 2224 | 6.78952486573 |
| NM_003104    | SORD   | 275  | 400  | 7.63752177228 |
| NM_003101    | SOAT1  | 99   | 193  | 10.0021042048 |
| NM_003101    | SOAT1  | 3460 | 3523 | 7.54266585515 |
| NM_003101    | SOAT1  | 3070 | 3139 | 7.54267257865 |
| NM_003101    | SOAT1  | 3684 | 3759 | 8.12762835587 |
| NM_003101    | SOAT1  | 2803 | 2857 | 7.54249883588 |
| NM_003101    | SOAT1  | 4792 | 4827 | 6.53865498603 |
| NM_003101    | SOAT1  | 829  | 1009 | 11.4968688966 |
| NM_003101    | SOAT1  | 2482 | 2515 | 6.45853337682 |
| NM_003101    | SOAT1  | 2228 | 2417 | 10.0021042048 |
| NM_003101    | SOAT1  | 532  | 825  | 11.8280748051 |
| NM_003101    | SOAT1  | 226  | 519  | 10.5426725862 |

|              |        |      |      |               |
|--------------|--------|------|------|---------------|
| NM_003101    | SOAT1  | 3935 | 4046 | 6.5426725862  |
| NM_003101    | SOAT1  | 1031 | 2216 | 14.5426725862 |
| NM_006460    | HEXIM1 | 1740 | 1788 | 6.30571655813 |
| NM_006460    | HEXIM1 | 1599 | 1700 | 5.72075405741 |
| NM_006460    | HEXIM1 | 3112 | 3142 | 4.63661484802 |
| NM_006460    | HEXIM1 | 2932 | 2973 | 4.71673645723 |
| NM_001014985 | GLTPD2 | 89   | 168  | 10.4587038357 |
| NM_001014985 | GLTPD2 | 1146 | 1192 | 10.4585300853 |
| NM_001014985 | GLTPD2 | 575  | 627  | 8.86972373477 |
| NM_001014985 | GLTPD2 | 331  | 363  | 8.78960212556 |
| NM_152756    | RICTOR | 4851 | 4890 | 6.86434725117 |
| NM_152756    | RICTOR | 8870 | 8919 | 6.86434725117 |
| NM_032268    | ZNRF1  | 419  | 462  | 5.90864273107 |
| NM_032268    | ZNRF1  | 1159 | 1236 | 7.57774444096 |
| NM_032268    | ZNRF1  | 1089 | 1146 | 7.99278193291 |
| NM_032264    | NBPF3  | 2742 | 2799 | 9.67121011893 |
| NM_032264    | NBPF3  | 2090 | 2156 | 9.67121011893 |
| NM_032264    | NBPF3  | 2599 | 2686 | 8.67121011893 |
| NM_032264    | NBPF3  | 1623 | 1664 | 9.5870776406  |
| NM_152758    | YTHDF3 | 401  | 445  | 6.66033208377 |
| NM_152758    | YTHDF3 | 184  | 228  | 4.6563144836  |
| NM_152758    | YTHDF3 | 1715 | 1856 | 7.24529458449 |
| NM_152758    | YTHDF3 | 2085 | 2298 | 7.66033208377 |
| NM_152758    | YTHDF3 | 2661 | 2704 | 4.66015833345 |
| NM_152758    | YTHDF3 | 1532 | 1677 | 7.66033208377 |
| NM_152758    | YTHDF3 | 2346 | 2409 | 4.57619287439 |
| NM_152758    | YTHDF3 | 799  | 938  | 7.24529458449 |
| NM_152758    | YTHDF3 | 695  | 784  | 6.98226017866 |
| NM_152758    | YTHDF3 | 286  | 388  | 5.66033208377 |
| NM_001014989 | LAT    | 425  | 511  | 8.09149631055 |
| NM_018441    | PECR   | 558  | 610  | 5.50285140221 |
| NM_018441    | PECR   | 944  | 993  | 3.83374969233 |
| NM_003761    | VAMP8  | 292  | 330  | 3.90020828392 |
| NM_003761    | VAMP8  | 508  | 596  | 4.90021501497 |
| NM_003761    | VAMP8  | 639  | 717  | 6.07014001642 |
| NM_003761    | VAMP8  | 114  | 169  | 5.22214310964 |
| NM_003761    | VAMP8  | 176  | 285  | 4.90021501497 |
| NM_003761    | VAMP8  | 337  | 493  | 6.60065473312 |
| NM_001077663 | URGCP  | 1290 | 1374 | 7.1146062324  |
| NM_001077663 | URGCP  | 1109 | 1165 | 8.69956896903 |
| NM_001077663 | URGCP  | 2760 | 2836 | 8.1146064681  |
| NM_001077663 | URGCP  | 2352 | 2390 | 8.11058886815 |
| NM_001077663 | URGCP  | 2519 | 2585 | 7.1146062324  |
| NM_001077663 | URGCP  | 2607 | 2677 | 7.11058886815 |
| NM_001077663 | URGCP  | 3792 | 3837 | 8.11058886815 |
| NM_001077663 | URGCP  | 888  | 941  | 7.1146062324  |
| NM_001077663 | URGCP  | 1658 | 1750 | 8.11460646832 |
| NM_001077663 | URGCP  | 3547 | 3611 | 8.03046725893 |
| NM_001077663 | URGCP  | 1168 | 1247 | 8.69939521872 |
| NM_001077663 | URGCP  | 1386 | 1592 | 10.574038087  |

|              |         |      |      |               |
|--------------|---------|------|------|---------------|
| NM_001077663 | URGCP   | 987  | 1080 | 7.11460646832 |
| NM_001077663 | URGCP   | 730  | 854  | 8.69956896904 |
| NM_001077663 | URGCP   | 505  | 714  | 9.92196139038 |
| NM_001017981 | RNF215  | 1041 | 1070 | 8.46195534652 |
| NM_001077665 | AGAP6   | 2500 | 2564 | 7.69946606384 |
| NM_001077665 | AGAP6   | 2587 | 2685 | 8.69963981416 |
| NM_006314    | CNKSRI  | 1464 | 1514 | 9.7012219898  |
| NM_006314    | CNKSRI  | 162  | 246  | 10.7052328589 |
| NM_006314    | CNKSRI  | 374  | 412  | 10.6211003806 |
| NM_006314    | CNKSRI  | 1402 | 1445 | 10.6211003806 |
| NM_001023563 | ZNF805  | 5830 | 5882 | 12.0879252814 |
| NM_001023563 | ZNF805  | 5287 | 5343 | 11.1720642549 |
| NM_001023563 | ZNF805  | 7054 | 7123 | 11.1720644908 |
| NM_001023563 | ZNF805  | 5094 | 5151 | 12.1720642549 |
| NM_001023567 | GOLGA8B | 3792 | 3849 | 4.67287454127 |
| NM_001023567 | GOLGA8B | 3668 | 3709 | 3.58873533188 |
| NM_001023567 | GOLGA8B | 2883 | 2988 | 3.67287454127 |
| NM_001023567 | GOLGA8B | 2811 | 2867 | 5.25783704199 |
| NM_001023567 | GOLGA8B | 2221 | 2271 | 3.67287454127 |
| NM_001023567 | GOLGA8B | 3435 | 3495 | 3.67270079095 |
| NM_001023567 | GOLGA8B | 3749 | 3790 | 5.25783704177 |
| NM_001023567 | GOLGA8B | 2064 | 2221 | 5.67287454127 |
| NM_001023567 | GOLGA8B | 2725 | 2810 | 3.67287454127 |
| NM_001023567 | GOLGA8B | 2003 | 2042 | 3.67286781021 |
| NM_001023567 | GOLGA8B | 4159 | 4257 | 5.25783704199 |
| NM_001023567 | GOLGA8B | 3051 | 3155 | 4.67287454127 |
| NM_001023567 | GOLGA8B | 2588 | 2717 | 5.25783704199 |
| NM_001023567 | GOLGA8B | 2993 | 3041 | 3.67286781021 |
| NM_001023567 | GOLGA8B | 4028 | 4104 | 4.67287454127 |
| NM_001023567 | GOLGA8B | 3274 | 3404 | 3.67287454127 |
| NM_001023567 | GOLGA8B | 2386 | 2492 | 3.67287454127 |
| NM_001039182 | BOLA2B  | 790  | 857  | 7.88917984325 |
| NM_001039182 | BOLA2B  | 664  | 781  | 7.66678742192 |
| NM_001039182 | BOLA2B  | 909  | 995  | 7.0818249212  |
| NM_003314    | TTC1    | 1013 | 1073 | 5.41106697662 |
| NM_003314    | TTC1    | 935  | 981  | 4.99586245808 |
| NM_003314    | TTC1    | 1166 | 1263 | 4.41107370768 |
| NM_015658    | NOC2L   | 2384 | 2438 | 4.23707964426 |
| NM_015658    | NOC2L   | 1813 | 1870 | 6.23707964426 |
| NM_015658    | NOC2L   | 829  | 881  | 6.82204214498 |
| NM_015658    | NOC2L   | 1674 | 1747 | 6.23707964425 |
| NM_015658    | NOC2L   | 343  | 393  | 6.5590077316  |
| NM_015658    | NOC2L   | 235  | 322  | 5.23707964426 |
| NM_015658    | NOC2L   | 2243 | 2350 | 5.82204214498 |
| NM_015658    | NOC2L   | 1245 | 1318 | 4.23707964426 |
| NM_015658    | NOC2L   | 81   | 166  | 6.23707964426 |
| NM_015658    | NOC2L   | 2627 | 2685 | 4.23707964426 |
| NM_015658    | NOC2L   | 1471 | 1671 | 7.04443456632 |
| NM_015658    | NOC2L   | 1773 | 1804 | 4.15294043487 |
| NM_015658    | NOC2L   | 888  | 1037 | 6.82204214498 |

|              |          |      |      |                    |
|--------------|----------|------|------|--------------------|
| NM_015658    | NOC2L    | 1073 | 1186 | 6.55900773914      |
| NM_015658    | NOC2L    | 586  | 829  | 8.55900773914      |
| NM_015658    | NOC2L    | 1960 | 2224 | 7.69651126289      |
| NM_015658    | NOC2L    | 414  | 538  | 5.82204214498      |
| NM_015658    | NOC2L    | 2453 | 2535 | 6.55900773914      |
| NM_015658    | NOC2L    | 1364 | 1471 | 6.23707964426      |
| NM_015659    | RSL1D1   | 325  | 402  | 3.89013194472      |
| NM_015659    | RSL1D1   | 820  | 894  | 3.15316635055      |
| NM_015659    | RSL1D1   | 155  | 225  | 3.15316635055      |
| NM_015659    | RSL1D1   | 749  | 816  | 1.56820384983      |
| NM_015659    | RSL1D1   | 1622 | 1670 | 2.56418624966      |
| NM_015659    | RSL1D1   | 1143 | 1177 | 2.56418624966      |
| NM_015659    | RSL1D1   | 226  | 274  | 2.56418624966      |
| NM_015659    | RSL1D1   | 689  | 746  | 1.56803009951      |
| NM_015659    | RSL1D1   | 552  | 687  | 5.02763546847      |
| NM_001145928 | SAP130   | 2770 | 2838 | 9.16830577945      |
| NM_001145928 | SAP130   | 2627 | 2685 | 9.5873608789       |
| NM_001145928 | SAP130   | 1542 | 1591 | 9.16830577945      |
| NM_001145928 | SAP130   | 3171 | 3227 | 7.58718712858      |
| NM_001145928 | SAP130   | 2576 | 2627 | 7.50322166952      |
| NM_001145928 | SAP130   | 1687 | 1738 | 8.58735414785      |
| NM_001145928 | SAP130   | 3072 | 3155 | 7.58334327873      |
| NM_015652    | C10orf12 |      | 1634 | 1677 9.82744975696 |
| NM_015652    | C10orf12 |      | 2381 | 2454 8.24248725624 |
| NM_015654    | NAT9     | 508  | 578  | 6.11690394055      |
| NM_015654    | NAT9     | 811  | 893  | 5.11288634038      |
| NM_015386    | COG4     | 320  | 366  | 4.94112318322      |
| NM_015386    | COG4     | 1433 | 1468 | 7.02526238505      |
| NM_015386    | COG4     | 400  | 489  | 7.34719048749      |
| NM_015386    | COG4     | 1623 | 1708 | 7.02525566155      |
| NM_015386    | COG4     | 1472 | 1523 | 6.02526239238      |
| NM_015386    | COG4     | 932  | 1036 | 6.6102248931       |
| NM_015386    | COG4     | 1168 | 1274 | 6.02508864228      |
| NM_015386    | COG4     | 776  | 828  | 6.02124479243      |
| NM_015387    | MOB4     | 287  | 345  | 7.5450058245       |
| NM_015387    | MOB4     | 2532 | 2578 | 5.96004332378      |
| NM_015382    | HECTD1   | 2641 | 2679 | 3.18969393244      |
| NM_015382    | HECTD1   | 1175 | 1216 | 2.10957232323      |
| NM_015382    | HECTD1   | 1464 | 1551 | 4.19371153261      |
| NM_015382    | HECTD1   | 708  | 745  | 3.1935377823       |
| NM_015382    | HECTD1   | 7297 | 7338 | 2.18969393244      |
| NM_015382    | HECTD1   | 8435 | 8527 | 3.77866730228      |
| NM_015382    | HECTD1   | 8336 | 8396 | 3.18969393244      |
| NM_015382    | HECTD1   | 3421 | 3490 | 5.19371153261      |
| NM_015382    | HECTD1   | 7548 | 7602 | 3.18969393244      |
| NM_015382    | HECTD1   | 8561 | 8635 | 3.19371153261      |
| NM_015382    | HECTD1   | 8724 | 8812 | 3.77866730228      |
| NM_015382    | HECTD1   | 1117 | 1167 | 3.1935377823       |
| NM_015382    | HECTD1   | 3016 | 3055 | 2.1937112967       |
| NM_015382    | HECTD1   | 3977 | 4028 | 3.18969393244      |

|           |        |      |      |               |
|-----------|--------|------|------|---------------|
| NM_015382 | HECTD1 | 2929 | 3003 | 3.1937112967  |
| NM_015382 | HECTD1 | 6651 | 6735 | 3.19371153261 |
| NM_015382 | HECTD1 | 1670 | 1785 | 4.19371153261 |
| NM_015382 | HECTD1 | 5784 | 5826 | 2.19370480156 |
| NM_015382 | HECTD1 | 4909 | 5022 | 4.19371153261 |
| NM_015382 | HECTD1 | 1377 | 1452 | 4.19371153261 |
| NM_015382 | HECTD1 | 2252 | 2426 | 5.36363653406 |
| NM_015382 | HECTD1 | 5533 | 5708 | 4.77867403334 |
| NM_015382 | HECTD1 | 4136 | 4259 | 3.19371153261 |
| NM_015382 | HECTD1 | 7786 | 7931 | 3.77867403334 |
| NM_015382 | HECTD1 | 762  | 918  | 5.36363653406 |
| NM_015382 | HECTD1 | 3789 | 3872 | 4.19371153261 |
| NM_015382 | HECTD1 | 2557 | 2638 | 3.77867402579 |
| NM_015382 | HECTD1 | 2170 | 2242 | 3.77867402579 |
| NM_015382 | HECTD1 | 7090 | 7220 | 5.65314315125 |
| NM_015382 | HECTD1 | 7389 | 7448 | 2.1935377823  |
| NM_015382 | HECTD1 | 3513 | 3650 | 5.36363653406 |
| NM_015382 | HECTD1 | 5928 | 6039 | 4.5156396275  |
| NM_015382 | HECTD1 | 918  | 1066 | 5.36363653406 |
| NM_015382 | HECTD1 | 4411 | 4482 | 3.77866730228 |
| NM_015382 | HECTD1 | 3161 | 3249 | 4.19371153239 |
| NM_015382 | HECTD1 | 3295 | 3406 | 3.19371153261 |
| NM_015382 | HECTD1 | 6756 | 6897 | 4.19371153261 |
| NM_015382 | HECTD1 | 445  | 616  | 5.19371153261 |
| NM_003310 | TSSC1  | 644  | 714  | 7.32602359913 |
| NM_003310 | TSSC1  | 420  | 472  | 6.24590198992 |
| NM_015380 | SAMM50 | 457  | 507  | 5.90706320682 |
| NM_015380 | SAMM50 | 1124 | 1187 | 7.57616491693 |
| NM_015380 | SAMM50 | 1071 | 1118 | 6.57615818587 |
| NM_015380 | SAMM50 | 711  | 906  | 8.31313051109 |
| NM_015380 | SAMM50 | 1355 | 1415 | 4.99120240866 |
| NM_015380 | SAMM50 | 160  | 388  | 8.31313051109 |
| NM_015380 | SAMM50 | 551  | 619  | 4.98718481603 |
| NM_015388 | YIPF3  | 506  | 564  | 6.61595915391 |
| NM_015388 | YIPF3  | 118  | 192  | 5.03099665319 |
| NM_015388 | YIPF3  | 598  | 738  | 8.93788725635 |
| NM_015388 | YIPF3  | 744  | 789  | 6.61595892554 |
| NM_015388 | YIPF3  | 397  | 464  | 5.03099666074 |
| NM_015388 | YIPF3  | 251  | 395  | 7.61595916146 |
| NM_015388 | YIPF3  | 1181 | 1462 | 9.20092166218 |
| NM_015388 | YIPF3  | 799  | 1114 | 9.27892417418 |
| NM_002501 | NFIX   | 2895 | 2961 | 8.90251643318 |
| NM_002501 | NFIX   | 4168 | 4247 | 6.90234941391 |
| NM_002501 | NFIX   | 5290 | 5359 | 7.90252315668 |
| NM_002501 | NFIX   | 657  | 766  | 8.90252316423 |
| NM_002501 | NFIX   | 2689 | 2780 | 8.48748566495 |
| NM_002501 | NFIX   | 1342 | 1447 | 6.90251643318 |
| NM_002501 | NFIX   | 351  | 433  | 7.90252292831 |
| NM_002503 | NFKBIB | 329  | 402  | 8.91606969607 |
| NM_002503 | NFKBIB | 279  | 327  | 7.33093344503 |



|              |         |      |      |               |
|--------------|---------|------|------|---------------|
| NM_002503    | NFKBIB  | 220  | 279  | 8.33110719513 |
| NM_002503    | NFKBIB  | 577  | 719  | 9.33110719535 |
| NM_001034116 | EIF2B4  | 1368 | 1390 | 3.60814348478 |
| NM_001034116 | EIF2B4  | 1473 | 1563 | 5.61216108473 |
| NM_001034116 | EIF2B4  | 1628 | 1668 | 3.52802187556 |
| NM_024519    | FAM65A  | 1703 | 1754 | 7.12388088703 |
| NM_024519    | FAM65A  | 3304 | 3392 | 9.12405463735 |
| NM_002508    | NID1    | 4507 | 4555 | 4.2362626357  |
| NM_002508    | NID1    | 4679 | 4766 | 5.82139888674 |
| NM_002508    | NID1    | 3876 | 3941 | 5.23643638602 |
| NM_002508    | NID1    | 4564 | 4650 | 5.45882880736 |
| NM_002508    | NID1    | 5042 | 5097 | 4.2364363858  |
| NM_002508    | NID1    | 1990 | 2276 | 7.86092725093 |
| NM_002508    | NID1    | 2277 | 2441 | 6.73893672655 |
| NM_002508    | NID1    | 1399 | 1696 | 7.86092725093 |
| NM_002508    | NID1    | 3970 | 4125 | 4.23643638602 |
| NM_002508    | NID1    | 4316 | 4504 | 6.73893672655 |
| NM_002508    | NID1    | 334  | 502  | 6.82139888674 |
| NM_002508    | NID1    | 1138 | 1396 | 7.40636138746 |
| NM_002508    | NID1    | 2771 | 3864 | 9.69586800466 |
| NM_002508    | NID1    | 2454 | 2584 | 5.6514738853  |
| NM_002508    | NID1    | 759  | 1135 | 7.89940139874 |
| NM_002508    | NID1    | 5105 | 5205 | 4.23643638602 |
| NM_002508    | NID1    | 514  | 732  | 6.97340198019 |
| NM_002508    | NID1    | 4130 | 4289 | 5.23643638602 |
| NM_002508    | NID1    | 79   | 332  | 6.6514738853  |
| NM_002508    | NID1    | 1696 | 1985 | 7.04379130808 |
| NM_002508    | NID1    | 5338 | 5527 | 6.11090550394 |
| NM_002508    | NID1    | 2597 | 2746 | 5.45882880736 |
| NM_002508    | NID1    | 4811 | 4991 | 6.55836448091 |
| NM_001144030 | NAT10   | 2114 | 2158 | 4.09790926597 |
| NM_001144030 | NAT10   | 2575 | 2647 | 5.68287176669 |
| NM_001144030 | NAT10   | 2508 | 2560 | 5.0139438069  |
| NM_001144030 | NAT10   | 1824 | 1908 | 6.42001111117 |
| NM_001144030 | NAT10   | 2335 | 2418 | 5.09790926597 |
| NM_001144030 | NAT10   | 773  | 908  | 5.09808301629 |
| NM_001144030 | NAT10   | 418  | 474  | 5.68287176669 |
| NM_001144030 | NAT10   | 1521 | 1680 | 5.68304551701 |
| NM_001144030 | NAT10   | 2649 | 2737 | 5.09808278037 |
| NM_001144030 | NAT10   | 983  | 1125 | 6.90543793834 |
| NM_001144030 | NAT10   | 2262 | 2335 | 4.09406541611 |
| NM_001144032 | PPIAL4E | 523  | 564  | 9.00457524045 |
| NM_001144032 | PPIAL4E | 606  | 642  | 8.00457524045 |
| NM_001144032 | PPIAL4E | 164  | 213  | 9.00457524045 |
| NM_001144032 | PPIAL4E | 721  | 745  | 7.00457500453 |
| NM_001144032 | PPIAL4E | 422  | 465  | 9.32650333534 |
| NM_001144032 | PPIAL4E | 215  | 281  | 9.32650333534 |
| NM_014389    | PELP1   | 795  | 880  | 9.04128489807 |
| NM_014389    | PELP1   | 2753 | 2806 | 7.45230479717 |
| NM_014389    | PELP1   | 342  | 384  | 6.45632239734 |

|              |          |      |      |                    |
|--------------|----------|------|------|--------------------|
| NM_014389    | PELP1    | 2042 | 2144 | 8.45632239735      |
| NM_014389    | PELP1    | 2544 | 2605 | 6.45632239712      |
| NM_014389    | PELP1    | 1785 | 1858 | 7.45631566629      |
| NM_014389    | PELP1    | 704  | 755  | 6.37218318796      |
| NM_014389    | PELP1    | 1929 | 2032 | 8.77825049223      |
| NM_014389    | PELP1    | 3401 | 3447 | 7.45230479717      |
| NM_014389    | PELP1    | 597  | 664  | 7.45632239735      |
| NM_014389    | PELP1    | 1301 | 1439 | 10.0412848981      |
| NM_014389    | PELP1    | 1147 | 1283 | 9.62624739879      |
| NM_014389    | PELP1    | 1466 | 1565 | 8.04128489807      |
| NM_014389    | PELP1    | 881  | 966  | 8.04128489807      |
| NM_014388    | DIEXF    | 2106 | 2180 | 9.1115684556       |
| NM_014388    | DIEXF    | 1412 | 1487 | 7.78947334145      |
| NM_014388    | DIEXF    | 4471 | 4523 | 6.78964708422      |
| NM_014388    | DIEXF    | 924  | 1012 | 6.78964036071      |
| NM_001039457 | ATP6V0B  | 800  | 843  | 6.70182731652      |
| NM_001039457 | ATP6V0B  | 180  | 263  | 9.59332144796      |
| NM_001039457 | ATP6V0B  | 272  | 410  | 10.6928571215      |
| NM_001039457 | ATP6V0B  | 33   | 103  | 8.37092902662      |
| NM_001039457 | ATP6V0B  | 414  | 777  | 11.6928571215      |
| NM_014384    | ACAD8    | 194  | 285  | 8.384841147        |
| NM_018009    | TAPBPL   | 1216 | 1272 | 9.61586280279      |
| NM_018009    | TAPBPL   | 1507 | 1574 | 8.69999528112      |
| NM_015038    | KIAA0754 |      | 2345 | 2420 9.03572507317 |
| NM_015038    | KIAA0754 |      | 1444 | 1499 9.03572506562 |
| NM_015038    | KIAA0754 |      | 358  | 436 9.03572507317  |
| NM_018003    | UACA     | 4377 | 4438 | 3.86038907828      |
| NM_018003    | UACA     | 726  | 802  | 3.8643999474       |
| NM_018000    | MREG     | 1882 | 1900 | 5.71802317688      |
| NM_015037    | KIAA0913 |      | 3209 | 3323 7.69394024052 |
| NM_015037    | KIAA0913 |      | 3024 | 3073 8.27890274123 |
| NM_015037    | KIAA0913 |      | 302  | 369 6.69393350946  |
| NM_015037    | KIAA0913 |      | 4866 | 4922 7.68992264034 |
| NM_015037    | KIAA0913 |      | 4112 | 4193 8.27890274124 |
| NM_015037    | KIAA0913 |      | 5822 | 5921 6.68992264034 |
| NM_015037    | KIAA0913 |      | 3797 | 3907 6.69394024052 |
| NM_015037    | KIAA0913 |      | 582  | 654 7.69394024029  |
| NM_015037    | KIAA0913 |      | 4411 | 4505 8.69394024052 |
| NM_018006    | TRMU     | 1016 | 1100 | 8.33943460735      |
| NM_018006    | TRMU     | 685  | 733  | 7.9203795079       |
| NM_018006    | TRMU     | 466  | 521  | 7.92439687215      |
| NM_001433    | ERN1     | 2633 | 2694 | 9.09520152793      |
| NM_001433    | ERN1     | 2530 | 2577 | 9.68015729759      |
| NM_001433    | ERN1     | 587  | 646  | 8.09118392775      |
| NM_001433    | ERN1     | 2404 | 2441 | 9.01106231854      |
| NM_001433    | ERN1     | 833  | 877  | 9.68015729759      |
| NM_001433    | ERN1     | 672  | 740  | 8.09118392775      |
| NM_015032    | PDS5B    | 147  | 184  | 6.04406965342      |
| NM_015032    | PDS5B    | 3784 | 3834 | 6.04808724605      |
| NM_015032    | PDS5B    | 3431 | 3506 | 7.54891054493      |

|              |       |      |      |               |
|--------------|-------|------|------|---------------|
| NM_001130072 | EPN1  | 2401 | 2465 | 5.97451540139 |
| NM_001130072 | EPN1  | 304  | 442  | 6.71148099555 |
| NM_001130072 | EPN1  | 4    | 87   | 5.38955290067 |
| NM_001130072 | EPN1  | 446  | 483  | 5.38553530049 |
| NM_001130072 | EPN1  | 1494 | 1594 | 5.38955290067 |
| NM_001130072 | EPN1  | 1890 | 2022 | 6.38955290067 |
| NM_001130072 | EPN1  | 743  | 894  | 4.38955290067 |
| NM_001130072 | EPN1  | 483  | 729  | 7.71148099555 |
| NM_033133    | CNP   | 1610 | 1709 | 5.96258030196 |
| NM_033133    | CNP   | 2460 | 2518 | 5.96257357091 |
| NM_033133    | CNP   | 1259 | 1304 | 5.96258030196 |
| NM_033133    | CNP   | 1450 | 1493 | 4.87844109258 |
| NM_033133    | CNP   | 1181 | 1227 | 4.87844109258 |
| NM_033133    | CNP   | 969  | 1026 | 6.96258030196 |
| NM_033133    | CNP   | 1501 | 1605 | 6.54754280268 |
| NM_033133    | CNP   | 1842 | 1911 | 5.96258030196 |
| NM_033133    | CNP   | 776  | 892  | 5.96258030196 |
| NM_033133    | CNP   | 379  | 560  | 8.1325053034  |
| NM_033133    | CNP   | 1049 | 1114 | 5.96258030196 |
| NM_033133    | CNP   | 173  | 254  | 5.96258030196 |
| NM_033133    | CNP   | 586  | 767  | 7.54754280268 |
| NM_001130079 | MOV10 | 553  | 625  | 7.47175377805 |
| NM_001130079 | MOV10 | 1676 | 1745 | 8.79368187293 |
| NM_001130079 | MOV10 | 445  | 477  | 6.47158002773 |
| NM_001130079 | MOV10 | 2553 | 2590 | 6.46773617787 |
| NM_001130079 | MOV10 | 2984 | 3047 | 6.47175377805 |
| NM_001130079 | MOV10 | 1858 | 1925 | 7.47175377805 |
| NM_001130079 | MOV10 | 2093 | 2227 | 9.2791087001  |
| NM_001130079 | MOV10 | 273  | 422  | 9.79368187293 |
| NM_001130079 | MOV10 | 781  | 903  | 8.79368187293 |
| NM_001130079 | MOV10 | 990  | 1092 | 9.05671627877 |
| NM_001130079 | MOV10 | 2746 | 2853 | 6.47175377805 |
| NM_001130079 | MOV10 | 1442 | 1546 | 9.2791087001  |
| NM_001130079 | MOV10 | 1281 | 1408 | 8.47175377805 |
| NM_001130079 | MOV10 | 1168 | 1277 | 7.47175377805 |
| NM_001130079 | MOV10 | 3054 | 3144 | 6.47175377782 |
| NM_001130079 | MOV10 | 632  | 775  | 9.05671627877 |
| NM_001130079 | MOV10 | 2429 | 2528 | 8.79368187293 |
| NM_001130079 | MOV10 | 1969 | 2076 | 6.4717537705  |
| NM_001130079 | MOV10 | 3183 | 3319 | 6.47175377805 |
| NM_004857    | AKAP5 | 1042 | 1061 | 11.4218899831 |
| NM_001025242 | IRAK1 | 3019 | 3058 | 4.04946061594 |
| NM_001025242 | IRAK1 | 705  | 753  | 5.05347798019 |
| NM_001025242 | IRAK1 | 3326 | 3402 | 5.63844071683 |
| NM_001025242 | IRAK1 | 1614 | 1651 | 5.05347798019 |
| NM_001025242 | IRAK1 | 1016 | 1053 | 5.05347798019 |
| NM_001025242 | IRAK1 | 2483 | 2547 | 4.05347798019 |
| NM_001025242 | IRAK1 | 1891 | 1964 | 6.375406311   |
| NM_001025242 | IRAK1 | 1770 | 1833 | 5.63844070928 |
| NM_001025242 | IRAK1 | 3128 | 3180 | 3.96933900673 |

|              |          |      |      |                    |
|--------------|----------|------|------|--------------------|
| NM_001025242 | IRAK1    | 2253 | 2316 | 4.05347820856      |
| NM_001025242 | IRAK1    | 2937 | 3018 | 4.05347821611      |
| NM_001025242 | IRAK1    | 606  | 705  | 6.375406311        |
| NM_001025242 | IRAK1    | 1188 | 1236 | 3.96933900673      |
| NM_001025242 | IRAK1    | 1268 | 1432 | 6.86083313817      |
| NM_001025242 | IRAK1    | 2797 | 2936 | 6.63844071683      |
| NM_001025242 | IRAK1    | 2614 | 2728 | 4.05347821611      |
| NM_001025242 | IRAK1    | 754  | 1008 | 7.51290983475      |
| NM_001025242 | IRAK1    | 2118 | 2230 | 6.05347821611      |
| NM_001025242 | IRAK1    | 138  | 232  | 5.0534782161       |
| NM_004504    | AGFG1    | 3887 | 3947 | 6.54280525312      |
| NM_004504    | AGFG1    | 832  | 890  | 7.21190672731      |
| NM_004504    | AGFG1    | 1120 | 1158 | 6.62292686233      |
| NM_004504    | AGFG1    | 361  | 414  | 5.62292686233      |
| NM_004504    | AGFG1    | 1345 | 1419 | 5.62694446229      |
| NM_004504    | AGFG1    | 279  | 320  | 5.54280525312      |
| NM_030816    | ANKRD13C |      | 2839 | 2887 7.61659773119 |
| NM_030815    | PDRG1    | 255  | 329  | 5.71831321128      |
| NM_030815    | PDRG1    | 499  | 556  | 4.12933311039      |
| NM_030815    | PDRG1    | 1292 | 1362 | 4.13334397951      |
| NM_030815    | PDRG1    | 142  | 235  | 4.13335071056      |
| NM_030815    | PDRG1    | 637  | 806  | 6.45527880545      |
| NM_030815    | PDRG1    | 934  | 1049 | 6.71831321128      |
| NM_001384    | DPH2     | 239  | 316  | 7.66702449084      |
| NM_001384    | DPH2     | 1679 | 1728 | 6.66701776734      |
| NM_001384    | DPH2     | 1427 | 1529 | 7.66702449817      |
| NM_001384    | DPH2     | 1581 | 1628 | 7.66300689822      |
| NM_001384    | DPH2     | 1189 | 1238 | 6.58288528901      |
| NM_001384    | DPH2     | 969  | 1029 | 7.66702449839      |
| NM_030813    | CLPB     | 998  | 1076 | 6.967615441        |
| NM_030813    | CLPB     | 1919 | 1991 | 5.88347623184      |
| NM_030811    | MRPS26   | 784  | 816  | 5.55087997776      |
| NM_030810    | TXNDC5   | 2232 | 2336 | 4.54256473325      |
| NM_030810    | TXNDC5   | 1405 | 1508 | 3.95760223253      |
| NM_030810    | TXNDC5   | 1516 | 1705 | 5.86449282813      |
| NM_030810    | TXNDC5   | 2140 | 2181 | 2.53854713307      |
| NM_030810    | TXNDC5   | 459  | 957  | 7.00199635188      |
| NM_030810    | TXNDC5   | 49   | 113  | 1.95760223252      |
| NM_030810    | TXNDC5   | 1060 | 1384 | 6.54256473325      |
| NM_030810    | TXNDC5   | 159  | 452  | 5.6014584223       |
| NM_030810    | TXNDC5   | 2361 | 2721 | 5.91179854291      |
| NM_030810    | TXNDC5   | 1711 | 2135 | 6.97997004555      |
| NM_030810    | TXNDC5   | 2727 | 2887 | 3.54256473325      |
| NM_030810    | TXNDC5   | 966  | 1059 | 3.95760223253      |
| NM_033356    | CASP8    | 730  | 770  | 8.63871964743      |
| NM_033356    | CASP8    | 640  | 696  | 7.05359012744      |
| NM_012383    | OSTF1    | 811  | 880  | 4.72140137407      |
| NM_012383    | OSTF1    | 323  | 418  | 3.39947304349      |
| NM_012383    | OSTF1    | 248  | 307  | 2.31533407002      |
| NM_012382    | TTC33    | 953  | 1037 | 7.55272871032      |

|              |          |      |      |               |               |
|--------------|----------|------|------|---------------|---------------|
| NM_001134492 | HS2ST1   | 374  | 408  | 6.92392649245 |               |
| NM_001134492 | HS2ST1   | 862  | 890  | 5.25499853266 |               |
| NM_001134492 | HS2ST1   | 159  | 200  | 6.33913750613 |               |
| NM_001134492 | HS2ST1   | 476  | 552  | 6.33913774205 |               |
| NM_001134492 | HS2ST1   | 901  | 1071 | 9.50906274349 |               |
| NM_001134492 | HS2ST1   | 629  | 844  | 9.24602833765 |               |
| NM_001134493 | TOMM6    | 777  | 829  | 4.01313928697 |               |
| NM_001134493 | TOMM6    | 714  | 776  | 5.01313928697 |               |
| NM_001134493 | TOMM6    | 632  | 707  | 3.01313928696 |               |
| NM_001134493 | TOMM6    | 501  | 584  | 6.18306428841 |               |
| NM_001134493 | TOMM6    | 267  | 465  | 7.33506738186 |               |
| NM_001009184 | GRINA    | 1164 | 1299 | 6.94358742951 |               |
| NM_001009184 | GRINA    | 1516 | 1567 | 5.62165933462 |               |
| NM_001009184 | GRINA    | 503  | 566  | 4.62165933462 |               |
| NM_001009184 | GRINA    | 1727 | 1765 | 4.62148558431 |               |
| NM_001009184 | GRINA    | 586  | 1159 | 9.99669876597 |               |
| NM_001009184 | GRINA    | 1349 | 1499 | 7.20662183535 |               |
| NM_012384    | GMEB2    | 4032 | 4084 | 6.96903569294 |               |
| NM_012384    | GMEB2    | 741  | 809  | 9.29097051866 |               |
| NM_012384    | GMEB2    | 3243 | 3295 | 9.29097051888 |               |
| NM_012384    | GMEB2    | 953  | 1009 | 8.5538311744  |               |
| NM_012384    | GMEB2    | 3066 | 3108 | 6.88490321461 |               |
| NM_012384    | GMEB2    | 2198 | 2263 | 6.88490321461 |               |
| NM_012384    | GMEB2    | 542  | 628  | 7.88490321461 |               |
| NM_012384    | GMEB2    | 3304 | 3387 | 7.96904241644 |               |
| NM_001084    | PL0D3    | 230  | 321  | 8.81859596609 |               |
| NM_001084    | PL0D3    | 2864 | 2921 | 6.49666787121 |               |
| NM_001084    | PL0D3    | 2922 | 2967 | 7.81859596609 |               |
| NM_001084    | PL0D3    | 2383 | 2491 | 8.08163037193 |               |
| NM_001084    | PL0D3    | 679  | 907  | 10.140524061  |               |
| NM_001084    | PL0D3    | 7    | 89   | 6.49265027103 |               |
| NM_001084    | PL0D3    | 2733 | 2852 | 8.66659287265 |               |
| NM_001084    | PL0D3    | 913  | 962  | 7.49666787098 |               |
| NM_001084    | PL0D3    | 1840 | 1986 | 9.81859596609 |               |
| NM_001084    | PL0D3    | 513  | 678  | 8.66659287265 |               |
| NM_001084    | PL0D3    | 978  | 1332 | 10.9885209675 |               |
| NM_001084    | PL0D3    | 365  | 508  | 7.81859596609 |               |
| NM_001084    | PL0D3    | 1332 | 1834 | 11.0816303719 |               |
| NM_001084    | PL0D3    | 2492 | 2725 | 9.95609948984 |               |
| NM_001084    | PL0D3    | 1989 | 2374 | 10.6665928726 |               |
| NM_001085    | SERPINA3 |      | 1140 | 1185          | 4.08175363057 |
| NM_001085    | SERPINA3 |      | 1089 | 1134          | 1.19025949913 |
| NM_001085    | SERPINA3 |      | 1024 | 1074          | 1.27439870851 |
| NM_001085    | SERPINA3 |      | 1283 | 1332          | 1.27439870851 |
| NM_001085    | SERPINA3 |      | 1355 | 1423          | 3.27439870851 |
| NM_001085    | SERPINA3 |      | 808  | 887           | 4.08175363057 |
| NM_001085    | SERPINA3 |      | 897  | 988           | 3.27439870851 |
| NM_001085    | SERPINA3 |      | 392  | 439           | 2.85918745892 |
| NM_001085    | SERPINA3 |      | 496  | 795           | 5.5963268034  |
| NM_001085    | SERPINA3 |      | 75   | 333           | 5.44432370996 |

|              |          |      |      |      |               |
|--------------|----------|------|------|------|---------------|
| NM_001085    | SERPINA3 |      | 1452 | 1591 | 3.85936120923 |
| NM_001087    | AAMP     | 1062 | 1135 |      | 3.64664016702 |
| NM_001087    | AAMP     | 1358 | 1428 |      | 5.23177641805 |
| NM_001087    | AAMP     | 755  | 830  |      | 4.64681391733 |
| NM_001087    | AAMP     | 876  | 957  |      | 5.64664016702 |
| NM_001087    | AAMP     | 1641 | 1725 |      | 3.64681391733 |
| NM_001087    | AAMP     | 1500 | 1547 |      | 4.64680718628 |
| NM_001087    | AAMP     | 612  | 700  |      | 5.23177641783 |
| NM_001087    | AAMP     | 168  | 261  |      | 6.23177641806 |
| NM_001087    | AAMP     | 1200 | 1313 |      | 5.23177641805 |
| NM_001087    | AAMP     | 347  | 543  |      | 6.23177641806 |
| NM_001190438 | NCOR1    | 2490 | 2546 |      | 4.90795705006 |
| NM_001190438 | NCOR1    | 14   | 77   |      | 5.90795704273 |
| NM_001190438 | NCOR1    | 1660 | 1718 |      | 3.90795031923 |
| NM_014921    | LPHN1    | 1374 | 1448 |      | 11.1193750486 |
| NM_014921    | LPHN1    | 7194 | 7255 |      | 10.1153574484 |
| NM_014921    | LPHN1    | 7459 | 7519 |      | 12.1192012983 |
| NM_014921    | LPHN1    | 3467 | 3529 |      | 11.1193683175 |
| NM_014921    | LPHN1    | 652  | 726  |      | 11.1193750484 |
| NM_014921    | LPHN1    | 801  | 857  |      | 11.1193748127 |
| NM_014921    | LPHN1    | 452  | 556  |      | 10.1193750486 |
| NM_014921    | LPHN1    | 8    | 53   |      | 11.1193683175 |
| NM_014921    | LPHN1    | 7520 | 7602 |      | 11.1193750486 |
| NM_014921    | LPHN1    | 2848 | 3098 |      | 12.9267299706 |
| NM_014921    | LPHN1    | 1238 | 1360 |      | 11.7043375493 |
| NM_014921    | LPHN1    | 5217 | 5337 |      | 11.1193750486 |
| NM_001195156 | ZMYM6NB  | 133  | 297  |      | 11.4440099505 |
| NM_001195156 | ZMYM6NB  | 53   | 99   |      | 8.55251581908 |
| NM_001195156 | ZMYM6NB  | 468  | 518  |      | 9.63263742829 |
| NM_001195156 | ZMYM6NB  | 300  | 440  |      | 11.4440099505 |
| NM_014925    | R3HDM2   | 2878 | 2930 |      | 7.7803794632  |
| NM_001089    | ABCA3    | 1024 | 1104 |      | 14.250913572  |
| NM_001089    | ABCA3    | 1867 | 1972 |      | 15.0582684941 |
| NM_001089    | ABCA3    | 2841 | 2913 |      | 14.250913572  |
| NM_001089    | ABCA3    | 165  | 246  |      | 13.250913572  |
| NM_001089    | ABCA3    | 5938 | 5994 |      | 13.250913572  |
| NM_001089    | ABCA3    | 1185 | 1263 |      | 14.250913572  |
| NM_001089    | ABCA3    | 4097 | 4183 |      | 14.5728416669 |
| NM_001089    | ABCA3    | 6540 | 6598 |      | 13.2509135645 |
| NM_001089    | ABCA3    | 4487 | 4582 |      | 13.250913572  |
| NM_001089    | ABCA3    | 2757 | 2831 |      | 14.2509135718 |
| NM_001089    | ABCA3    | 6011 | 6057 |      | 13.8358760727 |
| NM_001089    | ABCA3    | 4899 | 4941 |      | 12.2468959718 |
| NM_001089    | ABCA3    | 3388 | 3455 |      | 13.2468959718 |
| NM_001089    | ABCA3    | 3523 | 3645 |      | 15.0582684941 |
| NM_001089    | ABCA3    | 5236 | 5266 |      | 13.250906841  |
| NM_001089    | ABCA3    | 5660 | 5753 |      | 13.250913572  |
| NM_001089    | ABCA3    | 2225 | 2299 |      | 12.250913572  |
| NM_001089    | ABCA3    | 6230 | 6291 |      | 12.250906841  |
| NM_001089    | ABCA3    | 4241 | 4484 |      | 16.0582684941 |

|           |        |      |      |               |
|-----------|--------|------|------|---------------|
| NM_001089 | ABCA3  | 5027 | 5168 | 15.0582684941 |
| NM_001089 | ABCA3  | 2470 | 2719 | 15.8358760727 |
| NM_001089 | ABCA3  | 3280 | 3373 | 13.8358760727 |
| NM_001089 | ABCA3  | 4943 | 5010 | 12.250913572  |
| NM_001089 | ABCA3  | 1543 | 1788 | 16.1578041676 |
| NM_001089 | ABCA3  | 2328 | 2415 | 13.250913572  |
| NM_001089 | ABCA3  | 3650 | 3789 | 15.250913572  |
| NM_001089 | ABCA3  | 4666 | 4863 | 15.250913572  |
| NM_001089 | ABCA3  | 3205 | 3275 | 13.2468959718 |
| NM_001089 | ABCA3  | 6080 | 6203 | 14.250913572  |
| NM_001089 | ABCA3  | 1975 | 2026 | 12.2468959718 |
| NM_001089 | ABCA3  | 3835 | 4035 | 14.8358760727 |
| NM_001089 | ABCA3  | 1271 | 1430 | 14.5728416669 |
| NM_001089 | ABCA3  | 334  | 966  | 17.1578041676 |
| NM_001089 | ABCA3  | 2030 | 2176 | 15.7103451907 |
| NM_213649 | SFXN4  | 802  | 856  | 5.86584533551 |
| NM_213649 | SFXN4  | 158  | 247  | 6.45081456728 |
| NM_213649 | SFXN4  | 879  | 946  | 6.45081456728 |
| NM_213649 | SFXN4  | 963  | 1070 | 7.45081456728 |
| NM_213649 | SFXN4  | 257  | 373  | 6.45081456728 |
| NM_213649 | SFXN4  | 627  | 798  | 7.86585206656 |
| NM_213647 | FGFR4  | 1036 | 1090 | 6.82907188604 |
| NM_213647 | FGFR4  | 2954 | 3015 | 6.24410938532 |
| NM_213647 | FGFR4  | 1099 | 1143 | 5.2441093851  |
| NM_213647 | FGFR4  | 2037 | 2076 | 5.24410938532 |
| NM_213647 | FGFR4  | 3021 | 3080 | 5.2441091494  |
| NM_213647 | FGFR4  | 2467 | 2581 | 8.5660374802  |
| NM_213647 | FGFR4  | 53   | 163  | 6.24410938532 |
| NM_213647 | FGFR4  | 2725 | 2757 | 5.24009178514 |
| NM_213647 | FGFR4  | 1632 | 1929 | 9.24410938532 |
| NM_213647 | FGFR4  | 2332 | 2446 | 7.5660374802  |
| NM_213647 | FGFR4  | 207  | 364  | 8.41403438676 |
| NM_213647 | FGFR4  | 2767 | 2942 | 9.05146430738 |
| NM_213647 | FGFR4  | 2077 | 2178 | 9.15099998093 |
| NM_213647 | FGFR4  | 491  | 664  | 8.24410938532 |
| NM_213647 | FGFR4  | 2583 | 2704 | 7.24410938532 |
| NM_213647 | FGFR4  | 2181 | 2306 | 8.5660374802  |
| NM_213647 | FGFR4  | 805  | 995  | 9.24410938532 |
| NM_213647 | FGFR4  | 1148 | 1632 | 9.99899688748 |
| NM_213647 | FGFR4  | 365  | 465  | 8.05146430738 |
| NM_080422 | PTPN2  | 1370 | 1443 | 4.04327242722 |
| NM_017861 | PIGX   | 271  | 326  | 7.78960677463 |
| NM_017861 | PIGX   | 519  | 602  | 9.7936243748  |
| NM_017861 | PIGX   | 412  | 503  | 9.3785868753  |
| NM_017861 | PIGX   | 642  | 728  | 8.7936243748  |
| NM_017861 | PIGX   | 1497 | 1543 | 7.79362436725 |
| NM_017712 | PGPEP1 | 1615 | 1675 | 8.18806496947 |
| NM_017712 | PGPEP1 | 191  | 231  | 8.68888826081 |
| NM_017712 | PGPEP1 | 6986 | 7032 | 8.18806496193 |
| NM_017712 | PGPEP1 | 985  | 1045 | 7.18806496947 |

|              |          |      |      |               |               |
|--------------|----------|------|------|---------------|---------------|
| NM_017712    | PGPEP1   | 348  | 390  | 7.1840473693  |               |
| NM_017712    | PGPEP1   | 788  | 854  | 8.18806496947 |               |
| NM_017712    | PGPEP1   | 3905 | 3957 | 8.77302073914 |               |
| NM_017712    | PGPEP1   | 4994 | 5052 | 8.77302723428 |               |
| NM_017712    | PGPEP1   | 1747 | 1785 | 8.77302073914 |               |
| NM_017712    | PGPEP1   | 3247 | 3296 | 9.18806473356 |               |
| NM_017712    | PGPEP1   | 1086 | 1115 | 8.18806473356 |               |
| NM_017712    | PGPEP1   | 2470 | 2520 | 7.1840473693  |               |
| NM_017712    | PGPEP1   | 498  | 558  | 8.18806473356 |               |
| NM_017712    | PGPEP1   | 612  | 667  | 8.77302747019 |               |
| NM_017712    | PGPEP1   | 2983 | 3051 | 9.18806496947 |               |
| NM_017712    | PGPEP1   | 5618 | 5687 | 8.18806496947 |               |
| NM_017712    | PGPEP1   | 3625 | 3698 | 7.18806496947 |               |
| NM_017712    | PGPEP1   | 2376 | 2451 | 7.18806496947 |               |
| NM_017712    | PGPEP1   | 3756 | 3825 | 7.18805823842 |               |
| NM_017712    | PGPEP1   | 5413 | 5511 | 8.18806496947 |               |
| NM_017712    | PGPEP1   | 6769 | 6985 | 9.50999306436 |               |
| NM_017712    | PGPEP1   | 5823 | 5943 | 10.5099930644 |               |
| NM_017712    | PGPEP1   | 108  | 166  | 7.1840473693  |               |
| NM_017712    | PGPEP1   | 5535 | 5610 | 7.18806496947 |               |
| NM_017712    | PGPEP1   | 6609 | 6671 | 9.18806496947 |               |
| NM_017712    | PGPEP1   | 3363 | 3502 | 9.18806496947 |               |
| NM_017712    | PGPEP1   | 6273 | 6335 | 8.18789121916 |               |
| NM_017712    | PGPEP1   | 6346 | 6414 | 7.18789121916 |               |
| NM_017864    | INTS8    | 758  | 826  | 7.86050472301 |               |
| NM_017866    | TMEM70   | 515  | 560  | 8.64123759763 |               |
| NM_017866    | TMEM70   | 445  | 511  | 7.90409825315 |               |
| NM_017866    | TMEM70   | 1585 | 1616 | 7.90427199592 |               |
| NM_017866    | TMEM70   | 1671 | 1692 | 7.23517029337 |               |
| NM_001032363 | C1orf151 |      | 455  | 505           | 7.37443593491 |
| NM_001032363 | C1orf151 |      | 62   | 163           | 6.63747034074 |
| NM_001032363 | C1orf151 |      | 174  | 221           | 6.6374703332  |
| NM_001032367 | SPINT1   | 148  | 215  | 11.297935852  |               |
| NM_001032367 | SPINT1   | 2142 | 2217 | 10.8828983527 |               |
| NM_001032367 | SPINT1   | 1981 | 2138 | 13.4678608534 |               |
| NM_001032367 | SPINT1   | 1836 | 1980 | 12.8828983527 |               |
| NM_001032367 | SPINT1   | 66   | 135  | 9.29793585196 |               |
| NM_001032367 | SPINT1   | 231  | 524  | 13.105290774  |               |
| NM_001032367 | SPINT1   | 1321 | 1681 | 13.821497808  |               |
| NM_001032367 | SPINT1   | 1688 | 1806 | 11.8828983527 |               |
| NM_001032367 | SPINT1   | 1081 | 1315 | 13.6198639469 |               |
| NM_001032367 | SPINT1   | 540  | 1077 | 14.2048264476 |               |
| NM_033200    | LMF2     | 1791 | 1868 | 10.0232077672 |               |
| NM_033200    | LMF2     | 724  | 776  | 11.0232077672 |               |
| NM_033200    | LMF2     | 1940 | 2028 | 10.0232077672 |               |
| NM_033200    | LMF2     | 781  | 917  | 11.0232077672 |               |
| NM_033200    | LMF2     | 2059 | 2171 | 10.3451358621 |               |
| NM_033200    | LMF2     | 393  | 465  | 10.6081702679 |               |
| NM_033200    | LMF2     | 1282 | 1363 | 9.02320776718 |               |
| NM_033200    | LMF2     | 2329 | 2444 | 10.0232077672 |               |



|              |          |      |      |               |               |
|--------------|----------|------|------|---------------|---------------|
| NM_033200    | LMF2     | 1364 | 1572 | 12.1931327686 |               |
| NM_033200    | LMF2     | 946  | 1278 | 12.7780952693 |               |
| NM_033200    | LMF2     | 518  | 721  | 10.3451358621 |               |
| NM_033200    | LMF2     | 59   | 116  | 9.01919016701 |               |
| NM_033200    | LMF2     | 215  | 363  | 10.6081702679 |               |
| NM_001889    | CRYZ     | 447  | 508  | 4.23497059857 |               |
| NM_001889    | CRYZ     | 1815 | 1885 | 4.90407230868 |               |
| NM_001889    | CRYZ     | 1374 | 1452 | 3.31910980041 |               |
| NM_001889    | CRYZ     | 652  | 696  | 3.31893605764 |               |
| NM_001206984 | METTL23  | 321  | 350  | 6.42144675345 |               |
| NM_001206984 | METTL23  | 354  | 417  | 4.92062345457 |               |
| NM_001206984 | METTL23  | 468  | 514  | 5.91660586194 |               |
| NM_001206984 | METTL23  | 588  | 718  | 6.92062346212 |               |
| NM_001880    | ATF2     | 2730 | 2797 | 4.7457665614  |               |
| NM_001880    | ATF2     | 154  | 215  | 5.74576655385 |               |
| NM_001880    | ATF2     | 88   | 142  | 5.74575983034 |               |
| NM_001880    | ATF2     | 300  | 350  | 6.24658985273 |               |
| NM_001880    | ATF2     | 2036 | 2082 | 4.74559281108 |               |
| NM_001880    | ATF2     | 1940 | 2017 | 5.74576656117 |               |
| NM_001880    | ATF2     | 2188 | 2248 | 4.74174896122 |               |
| NM_001880    | ATF2     | 890  | 996  | 6.7457665614  |               |
| NM_001100165 | PHACTR2  | 3630 | 3670 | 6.52558549853 |               |
| NM_001100165 | PHACTR2  | 2389 | 2470 | 7.11038097999 |               |
| NM_001100165 | PHACTR2  | 7886 | 7923 | 5.52558549853 |               |
| NM_001100165 | PHACTR2  | 3398 | 3477 | 7.11038097999 |               |
| NM_001100165 | PHACTR2  | 8578 | 8627 | 7.11054799926 |               |
| NM_001100165 | PHACTR2  | 7422 | 7535 | 5.52559222959 |               |
| NM_000190    | HMBS     | 1237 | 1271 | 5.52185237263 |               |
| NM_000190    | HMBS     | 981  | 1027 | 5.52586973689 |               |
| NM_000190    | HMBS     | 333  | 468  | 6.5258699728  |               |
| NM_001013631 | HNRNPCL1 |      | 464  | 504           | 4.03811005028 |
| NM_001013631 | HNRNPCL1 |      | 510  | 577           | 6.0381102862  |
| NM_001013631 | HNRNPCL1 |      | 1017 | 1084          | 4.0381102862  |
| NM_001013631 | HNRNPCL1 |      | 802  | 852           | 5.03811028598 |
| NM_001013631 | HNRNPCL1 |      | 409  | 453           | 5.62307278692 |
| NM_001013631 | HNRNPCL1 |      | 725  | 756           | 4.03793653588 |
| NM_006099    | PIAS3    | 2816 | 2896 | 12.107246971  |               |
| NM_006099    | PIAS3    | 1239 | 1290 | 12.8442123292 |               |
| NM_006099    | PIAS3    | 2720 | 2805 | 10.5221107199 |               |
| NM_006099    | PIAS3    | 1936 | 2021 | 11.5222844627 |               |
| NM_001100169 | IMMT     | 2920 | 2968 | 4.2698925596  |               |
| NM_001100169 | IMMT     | 1149 | 1205 | 2.68492332782 |               |
| NM_001100169 | IMMT     | 1055 | 1107 | 3.6809124587  |               |
| NM_001100169 | IMMT     | 2370 | 2435 | 2.68492332782 |               |
| NM_001100169 | IMMT     | 2180 | 2216 | 4.26989232368 |               |
| NM_001100169 | IMMT     | 853  | 937  | 3.68493005132 |               |
| NM_001100169 | IMMT     | 460  | 574  | 6.00685815376 |               |
| NM_001100169 | IMMT     | 2462 | 2504 | 4.26971880928 |               |
| NM_001100169 | IMMT     | 1377 | 1656 | 6.85485506032 |               |
| NM_001100169 | IMMT     | 600  | 772  | 5.68493005887 |               |

|              |          |      |      |                    |
|--------------|----------|------|------|--------------------|
| NM_001100169 | IMMT     | 1670 | 2071 | 6.49228498093      |
| NM_001100169 | IMMT     | 2807 | 2914 | 5.68493005887      |
| NM_001100169 | IMMT     | 2517 | 2660 | 5.00685815376      |
| NM_206839    | MORF4L1  | 511  | 582  | 4.44997270985      |
| NM_206839    | MORF4L1  | 1533 | 1618 | 5.03493521057      |
| NM_206839    | MORF4L1  | 341  | 386  | 2.36583350047      |
| NM_206839    | MORF4L1  | 1643 | 1698 | 4.77190080474      |
| NM_206839    | MORF4L1  | 1904 | 1937 | 2.36583350047      |
| NM_206839    | MORF4L1  | 631  | 661  | 2.44979895953      |
| NM_206839    | MORF4L1  | 757  | 974  | 6.77190080474      |
| NM_206839    | MORF4L1  | 1127 | 1451 | 7.44997270985      |
| NM_206839    | MORF4L1  | 1797 | 1880 | 4.03493521035      |
| NM_206839    | MORF4L1  | 976  | 1113 | 4.03493521057      |
| NM_032331    | ECE2     | 96   | 134  | 9.79219076428      |
| NM_182616    | C15orf38 |      | 5160 | 5226 9.7026381423  |
| NM_206831    | DPH3     | 447  | 486  | 7.96733558981      |
| NM_206831    | DPH3     | 110  | 190  | 8.96733559736      |
| NM_182612    | PDDC1    | 346  | 385  | 9.88615328399      |
| NM_182612    | PDDC1    | 820  | 886  | 8.88632030326      |
| NM_182612    | PDDC1    | 169  | 208  | 9.80218782493      |
| NM_182612    | PDDC1    | 2528 | 2561 | 8.80218782493      |
| NM_001134231 | NT5DC2   | 604  | 641  | 4.85027090691      |
| NM_001134231 | NT5DC2   | 1162 | 1212 | 3.76613193345      |
| NM_001134231 | NT5DC2   | 792  | 840  | 3.85027114283      |
| NM_001134231 | NT5DC2   | 1212 | 1270 | 6.17219923772      |
| NM_001134231 | NT5DC2   | 693  | 765  | 6.17219923772      |
| NM_001134231 | NT5DC2   | 962  | 1022 | 4.85009739251      |
| NM_001134231 | NT5DC2   | 1390 | 1453 | 3.85027090691      |
| NM_001134231 | NT5DC2   | 232  | 260  | 4.76613193345      |
| NM_001134231 | NT5DC2   | 849  | 938  | 6.17219923772      |
| NM_001134231 | NT5DC2   | 1526 | 1689 | 5.43523364355      |
| NM_001134231 | NT5DC2   | 340  | 577  | 7.17219923772      |
| NM_001134231 | NT5DC2   | 1308 | 1384 | 3.85026441178      |
| NM_001134232 | TMEM106B |      | 4104 | 4172 7.045635669   |
| NM_001134232 | TMEM106B |      | 655  | 708 7.045635669    |
| NM_001134232 | TMEM106B |      | 5624 | 5689 7.04161806883 |
| NM_001134232 | TMEM106B |      | 455  | 625 10.3675637639  |
| NM_001134232 | TMEM106B |      | 3035 | 3114 6.04546191869 |
| NM_001134232 | TMEM106B |      | 1315 | 1369 7.04161806883 |
| NM_001134232 | TMEM106B |      | 1706 | 1787 8.04563566878 |
| NM_001134232 | TMEM106B |      | 1145 | 1248 9.95252626461 |
| NM_001134232 | TMEM106B |      | 2749 | 2812 8.85299059106 |
| NM_001134232 | TMEM106B |      | 3444 | 3554 7.04562893795 |
| NM_001134232 | TMEM106B |      | 1015 | 1097 7.63059143867 |
| NM_001134232 | TMEM106B |      | 4365 | 4412 7.04161806883 |
| NM_001134232 | TMEM106B |      | 3243 | 3314 6.96149645962 |
| NM_001134232 | TMEM106B |      | 2335 | 2419 6.045635669   |
| NM_001134232 | TMEM106B |      | 803  | 1013 10.6894918588 |
| NM_001134232 | TMEM106B |      | 5901 | 5955 6.04562893795 |
| NM_001134232 | TMEM106B |      | 249  | 357 8.045635669    |

|           |        |      |      |               |
|-----------|--------|------|------|---------------|
| NM_004612 | TGFBR1 | 1252 | 1340 | 8.50201873661 |
| NM_004612 | TGFBR1 | 4325 | 4387 | 6.49800113644 |
| NM_004612 | TGFBR1 | 173  | 254  | 8.8239468315  |
| NM_004612 | TGFBR1 | 1122 | 1166 | 7.50201873661 |
| NM_004612 | TGFBR1 | 1356 | 1389 | 6.49800113644 |
| NM_004612 | TGFBR1 | 787  | 919  | 8.50201873661 |
| NM_004612 | TGFBR1 | 1757 | 1861 | 6.49800113644 |
| NM_004612 | TGFBR1 | 372  | 517  | 8.08698123733 |
| NM_004341 | CAD    | 6556 | 6635 | 8.72877085607 |
| NM_004341 | CAD    | 1542 | 1624 | 7.14380835534 |
| NM_004341 | CAD    | 4138 | 4204 | 8.72877085607 |
| NM_004341 | CAD    | 2808 | 2849 | 7.05966914596 |
| NM_004341 | CAD    | 5747 | 5866 | 8.14380835534 |
| NM_004341 | CAD    | 1281 | 1377 | 8.14380835534 |
| NM_004341 | CAD    | 2709 | 2757 | 8.72877085607 |
| NM_004341 | CAD    | 3856 | 3955 | 9.46573645023 |
| NM_004341 | CAD    | 669  | 749  | 8.72877085607 |
| NM_004341 | CAD    | 2288 | 2353 | 8.14380811943 |
| NM_004341 | CAD    | 1743 | 1812 | 8.13979075517 |
| NM_004341 | CAD    | 3796 | 3843 | 7.14380162429 |
| NM_004341 | CAD    | 5398 | 5454 | 8.72877085606 |
| NM_004341 | CAD    | 1677 | 1731 | 9.14380835534 |
| NM_004341 | CAD    | 4942 | 4965 | 7.05966914596 |
| NM_004341 | CAD    | 6338 | 6415 | 8.14380835512 |
| NM_004341 | CAD    | 2415 | 2472 | 8.72877084852 |
| NM_004341 | CAD    | 2162 | 2201 | 8.64463164668 |
| NM_004341 | CAD    | 117  | 166  | 7.14380162429 |
| NM_004341 | CAD    | 4587 | 4633 | 7.14363460503 |
| NM_004341 | CAD    | 2477 | 2539 | 7.14363460503 |
| NM_004341 | CAD    | 4485 | 4583 | 9.72877085607 |
| NM_004341 | CAD    | 1193 | 1258 | 8.72877062015 |
| NM_004341 | CAD    | 3428 | 3492 | 8.14380835534 |
| NM_004341 | CAD    | 2920 | 3212 | 11.8442480735 |
| NM_004341 | CAD    | 4678 | 4777 | 8.14380835534 |
| NM_004341 | CAD    | 3558 | 3621 | 8.13979075517 |
| NM_004341 | CAD    | 4302 | 4381 | 7.14380835534 |
| NM_004341 | CAD    | 3971 | 4030 | 8.14363460503 |
| NM_004341 | CAD    | 1921 | 2049 | 8.14380835534 |
| NM_004341 | CAD    | 5167 | 5248 | 8.1438083478  |
| NM_004341 | CAD    | 240  | 436  | 9.72877085607 |
| NM_004341 | CAD    | 501  | 603  | 8.14380835534 |
| NM_004341 | CAD    | 1379 | 1464 | 9.14380835534 |
| NM_004341 | CAD    | 836  | 1124 | 9.46573645023 |
| NM_004341 | CAD    | 6873 | 6996 | 7.14380162429 |
| NM_004342 | CALD1  | 2649 | 2758 | 3.20230755631 |
| NM_004342 | CALD1  | 1080 | 1161 | 3.20230755608 |
| NM_004342 | CALD1  | 3453 | 3501 | 3.20230732039 |
| NM_004342 | CALD1  | 1887 | 1922 | 3.19828995613 |
| NM_004342 | CALD1  | 1297 | 1369 | 3.20230755608 |
| NM_004342 | CALD1  | 3994 | 4052 | 3.20230755631 |

|              |        |      |      |               |
|--------------|--------|------|------|---------------|
| NM_004342    | CALD1  | 2302 | 2387 | 5.20230755631 |
| NM_004342    | CALD1  | 3297 | 3363 | 3.20230732039 |
| NM_004342    | CALD1  | 1646 | 1709 | 4.78325245686 |
| NM_004342    | CALD1  | 1969 | 2071 | 5.52423565119 |
| NM_004342    | CALD1  | 4088 | 4275 | 5.78727005703 |
| NM_004343    | CALR   | 12   | 51   | 2.24584044581 |
| NM_004343    | CALR   | 1721 | 1890 | 4.33330352298 |
| NM_004343    | CALR   | 1508 | 1717 | 6.05319560378 |
| NM_004343    | CALR   | 78   | 1506 | 8.18835518707 |
| NM_004616    | TSPAN8 | 132  | 171  | 10.6868662632 |
| NM_004616    | TSPAN8 | 480  | 587  | 12.3559679733 |
| NM_004616    | TSPAN8 | 618  | 717  | 12.7710054726 |
| NM_004616    | TSPAN8 | 190  | 475  | 14.9409304741 |
| NM_004616    | TSPAN8 | 727  | 930  | 14.0929335675 |
| NM_004616    | TSPAN8 | 973  | 1094 | 11.7710054726 |
| NM_004617    | TM4SF4 | 96   | 176  | 12.3485296417 |
| NM_004617    | TM4SF4 | 1032 | 1096 | 11.5005327351 |
| NM_004617    | TM4SF4 | 347  | 646  | 14.570922063  |
| NM_004617    | TM4SF4 | 1368 | 1469 | 12.5005327351 |
| NM_004617    | TM4SF4 | 702  | 1006 | 14.7635671409 |
| NM_004617    | TM4SF4 | 180  | 327  | 12.7635671409 |
| NM_004615    | TSPAN7 | 574  | 649  | 6.1535690098  |
| NM_004615    | TSPAN7 | 953  | 1005 | 4.15356877388 |
| NM_004615    | TSPAN7 | 1589 | 1663 | 5.73852477946 |
| NM_004615    | TSPAN7 | 402  | 517  | 6.1535690098  |
| NM_004615    | TSPAN7 | 832  | 912  | 5.73853151052 |
| NM_004615    | TSPAN7 | 663  | 795  | 6.73853151052 |
| NM_004615    | TSPAN7 | 169  | 316  | 7.73853151052 |
| NM_004618    | TOP3A  | 2095 | 2143 | 7.15387877676 |
| NM_004618    | TOP3A  | 907  | 939  | 6.15789614102 |
| NM_004618    | TOP3A  | 414  | 511  | 8.15789637694 |
| NM_004618    | TOP3A  | 1255 | 1328 | 6.07375716755 |
| NM_004618    | TOP3A  | 638  | 708  | 7.15788964588 |
| NM_004618    | TOP3A  | 3190 | 3261 | 6.15387877676 |
| NM_004618    | TOP3A  | 1593 | 1714 | 7.74285887766 |
| NM_001131036 | ZCCHC9 | 805  | 857  | 6.61474716061 |
| NM_001131036 | ZCCHC9 | 981  | 1054 | 6.02979139094 |
| NM_001131036 | ZCCHC9 | 491  | 597  | 6.02979139094 |
| NM_001131036 | ZCCHC9 | 706  | 780  | 6.61475389166 |
| NM_001033583 | AC0T9  | 1187 | 1235 | 7.14893042202 |
| NM_001033583 | AC0T9  | 356  | 407  | 7.15294778627 |
| NM_001033583 | AC0T9  | 1501 | 1557 | 6.14893042202 |
| NM_001033583 | AC0T9  | 572  | 641  | 7.737910287   |
| NM_001033583 | AC0T9  | 1067 | 1172 | 8.47487611708 |
| NM_001033583 | AC0T9  | 739  | 835  | 6.14893042202 |
| NM_001033583 | AC0T9  | 407  | 477  | 7.73790379186 |
| NM_134428    | RFX3   | 40   | 75   | 7.91374197911 |
| NM_015483    | KBTBD2 | 2892 | 2939 | 5.51973454784 |
| NM_015483    | KBTBD2 | 592  | 638  | 5.6038735213  |
| NM_015483    | KBTBD2 | 3450 | 3522 | 4.60387375722 |

|              |          |      |      |                   |
|--------------|----------|------|------|-------------------|
| NM_015483    | KBTBD2   | 1833 | 1917 | 6.18883625794     |
| NM_015483    | KBTBD2   | 2066 | 2141 | 5.60387375721     |
| NM_015483    | KBTBD2   | 1043 | 1087 | 6.18882952689     |
| NM_015483    | KBTBD2   | 2463 | 2503 | 4.59985615705     |
| NM_015483    | KBTBD2   | 3369 | 3444 | 4.603873757       |
| NM_015483    | KBTBD2   | 2207 | 2250 | 4.60387374967     |
| NM_015483    | KBTBD2   | 1101 | 1160 | 5.60386702617     |
| NM_015483    | KBTBD2   | 1661 | 1707 | 5.603873757       |
| NM_015483    | KBTBD2   | 323  | 454  | 6.60387375722     |
| NM_001037293 | PALM2    | 1215 | 1303 | 10.4467992303     |
| NM_148956    | NSUN5    | 1585 | 1631 | 9.81484764567     |
| NM_148956    | NSUN5    | 631  | 731  | 8.81484764589     |
| NM_148956    | NSUN5    | 891  | 965  | 8.81484764589     |
| NM_148956    | NSUN5    | 791  | 873  | 8.81484764589     |
| NM_148956    | NSUN5    | 1117 | 1148 | 7.225867545       |
| NM_148956    | NSUN5    | 475  | 606  | 9.81484764589     |
| NM_148956    | NSUN5    | 1291 | 1367 | 8.14574593579     |
| NM_020536    | CSRP2BP  | 1385 | 1473 | 7.87155406663     |
| NM_020536    | CSRP2BP  | 2534 | 2639 | 6.87155405908     |
| NM_020531    | C20orf3  | 614  | 725  | 6.27746873909     |
| NM_020531    | C20orf3  | 1703 | 1810 | 6.10754373764     |
| NM_020531    | C20orf3  | 1400 | 1442 | 3.1075437301      |
| NM_020531    | C20orf3  | 1459 | 1598 | 5.9148986597      |
| NM_020531    | C20orf3  | 505  | 612  | 5.42947183253     |
| NM_020531    | C20orf3  | 1057 | 1377 | 7.75139992742     |
| NM_020531    | C20orf3  | 1628 | 1696 | 4.69250623837     |
| NM_020531    | C20orf3  | 1821 | 2139 | 8.1950065789      |
| NM_020531    | C20orf3  | 155  | 482  | 8.27746873909     |
| NM_020531    | C20orf3  | 743  | 1054 | 7.86243123981     |
| NM_025010    | KLHL18   | 666  | 714  | 9.30380807092     |
| NM_020533    | MCOLN1   | 1634 | 1698 | 11.4480759374     |
| NM_020533    | MCOLN1   | 684  | 726  | 9.86695728651     |
| NM_020533    | MCOLN1   | 1236 | 1313 | 9.86713103683     |
| NM_020533    | MCOLN1   | 354  | 476  | 13.0370560383     |
| NM_020533    | MCOLN1   | 1416 | 1548 | 13.0370560383     |
| NM_020533    | MCOLN1   | 497  | 653  | 13.0370560383     |
| NM_020533    | MCOLN1   | 747  | 824  | 10.8671310368     |
| NM_020533    | MCOLN1   | 1022 | 1155 | 12.6744859589     |
| NM_020533    | MCOLN1   | 828  | 937  | 11.8671310368     |
| NM_016401    | C11orf73 |      | 587  | 641 8.06456290178 |
| NM_016401    | C11orf73 |      | 530  | 572 9.06438915901 |
| NM_016403    | CWC15    | 689  | 787  | 5.17141029631     |
| NM_016404    | TRMT112  | 576  | 615  | 4.19557362268     |
| NM_016404    | TRMT112  | 521  | 574  | 5.78437997326     |
| NM_016404    | TRMT112  | 636  | 729  | 7.65902284149     |
| NM_016404    | TRMT112  | 768  | 1029 | 9.15378753324     |
| NM_016406    | UFC1     | 268  | 340  | 7.26766179597     |
| NM_016406    | UFC1     | 368  | 507  | 7.94573370109     |
| NM_016406    | UFC1     | 953  | 996  | 5.94573346517     |
| NM_016406    | UFC1     | 599  | 725  | 7.26766179597     |

|              |          |      |      |                |               |
|--------------|----------|------|------|----------------|---------------|
| NM_016406    | UFC1     | 756  | 823  | 5.94555995077  |               |
| NM_016407    | C20orf43 |      | 512  | 582            | 2.69342674672 |
| NM_016407    | C20orf43 |      | 1015 | 1056           | 3.69342001567 |
| NM_016407    | C20orf43 |      | 1093 | 1178           | 5.50078166878 |
| NM_016407    | C20orf43 |      | 613  | 670            | 3.69342673917 |
| NM_016407    | C20orf43 |      | 72   | 228            | 5.01535484161 |
| NM_016407    | C20orf43 |      | 242  | 359            | 5.86335174816 |
| NM_016408    | CDK5RAP1 |      | 1008 | 1056           | 7.12953137783 |
| NM_016408    | CDK5RAP1 |      | 603  | 649            | 6.12953138516 |
| NM_016408    | CDK5RAP1 |      | 2031 | 2080           | 7.71432013578 |
| NM_016408    | CDK5RAP1 |      | 1849 | 1908           | 8.12935763506 |
| NM_016408    | CDK5RAP1 |      | 313  | 366            | 7.12952465432 |
| NM_016408    | CDK5RAP1 |      | 1671 | 1722           | 6.12935763506 |
| NM_016408    | CDK5RAP1 |      | 1083 | 1218           | 8.45145948027 |
| NM_016408    | CDK5RAP1 |      | 814  | 900            | 8.12952465432 |
| NM_016408    | CDK5RAP1 |      | 1237 | 1324           | 7.12953137783 |
| NM_016408    | CDK5RAP1 |      | 915  | 993            | 7.12953138538 |
| NM_016408    | CDK5RAP1 |      | 725  | 780            | 7.12935763506 |
| NM_016408    | CDK5RAP1 |      | 1540 | 1640           | 7.7144938861  |
| NM_017411    | SMN2     | 847  | 902  | 6.10312737391  |               |
| NM_017998    | C9orf40  | 1121 | 1174 | 4.93016307245  |               |
| NM_017998    | C9orf40  | 956  | 1015 | 6.01028468166  |               |
| NM_001037126 | EXOC4    | 355  | 421  | 5.86344491502  |               |
| NM_001037126 | EXOC4    | 701  | 745  | 5.86344491502  |               |
| NM_001037126 | EXOC4    | 1005 | 1103 | 7.75493904646  |               |
| NM_001037126 | EXOC4    | 872  | 986  | 6.9475841244   |               |
| NM_145897    | PFDN5    | 468  | 511  | 0.920339369735 |               |
| NM_145897    | PFDN5    | 195  | 324  | 2.92435696991  |               |
| NM_145897    | PFDN5    | 91   | 189  | 3.73171189197  |               |
| NM_172209    | TAPBP    | 554  | 657  | 10.9110629611  |               |
| NM_172209    | TAPBP    | 1436 | 1513 | 9.91106296115  |               |
| NM_172209    | TAPBP    | 1532 | 1572 | 8.32610046021  |               |
| NM_172209    | TAPBP    | 919  | 961  | 8.32610046021  |               |
| NM_172209    | TAPBP    | 282  | 338  | 8.32610045288  |               |
| NM_172209    | TAPBP    | 1298 | 1419 | 11.6480285553  |               |
| NM_172209    | TAPBP    | 1610 | 1679 | 9.91106296114  |               |
| NM_172209    | TAPBP    | 2051 | 2102 | 9.32208286025  |               |
| NM_172209    | TAPBP    | 1143 | 1265 | 11.6480285553  |               |
| NM_172209    | TAPBP    | 1001 | 1094 | 11.1334553825  |               |
| NM_172209    | TAPBP    | 344  | 548  | 11.6480285553  |               |
| NM_172209    | TAPBP    | 2845 | 2936 | 10.3261004604  |               |
| NM_172209    | TAPBP    | 780  | 896  | 10.9110629611  |               |
| NM_172209    | TAPBP    | 3011 | 3180 | 9.32610046043  |               |
| NM_172209    | TAPBP    | 3307 | 3401 | 10.3261004604  |               |
| NM_172209    | TAPBP    | 659  | 769  | 11.4960254619  |               |
| NM_172209    | TAPBP    | 3225 | 3300 | 9.9110629536   |               |
| NM_172209    | TAPBP    | 2143 | 2295 | 9.91106296115  |               |
| NM_172209    | TAPBP    | 2681 | 2770 | 9.32610046043  |               |
| NM_172209    | TAPBP    | 1929 | 2040 | 10.9110629611  |               |
| NM_001103146 | GIGYF2   | 5630 | 5660 | 4.51756416354  |               |

|              |           |      |      |               |               |
|--------------|-----------|------|------|---------------|---------------|
| NM_001103146 | GIGYF2    | 4166 | 4246 | 4.51773791385 |               |
| NM_001103146 | GIGYF2    | 1725 | 1783 | 6.83966600852 |               |
| NM_001103146 | GIGYF2    | 940  | 1055 | 6.10270041435 |               |
| NM_001103146 | GIGYF2    | 1363 | 1434 | 4.51372031368 |               |
| NM_001103146 | GIGYF2    | 1553 | 1651 | 5.51773791385 |               |
| NM_001103146 | GIGYF2    | 4251 | 4336 | 6.83966600874 |               |
| NM_001103146 | GIGYF2    | 361  | 433  | 6.10269368352 |               |
| NM_001103146 | GIGYF2    | 4904 | 5013 | 6.51773791363 |               |
| NM_001103146 | GIGYF2    | 4759 | 4857 | 5.51773791363 |               |
| NM_001103146 | GIGYF2    | 5084 | 5209 | 6.51773791385 |               |
| NM_017518    | HAUS7     | 99   | 124  | 8.12025735703 |               |
| NM_001966    | EHHADH    | 3288 | 3316 | 5.0426152067  |               |
| NM_001966    | EHHADH    | 1325 | 1359 | 6.12675440853 |               |
| NM_001966    | EHHADH    | 177  | 261  | 6.12675441607 |               |
| NM_000821    | GGCX      | 1616 | 1646 | 6.99864567561 |               |
| NM_000821    | GGCX      | 1247 | 1327 | 7.99864568316 |               |
| NM_000821    | GGCX      | 151  | 196  | 6.41367645138 |               |
| NM_000821    | GGCX      | 311  | 449  | 9.11412290058 |               |
| NM_000821    | GGCX      | 1875 | 2011 | 7.73561127732 |               |
| NM_000821    | GGCX      | 5752 | 5781 | 5.40966558226 |               |
| NM_000821    | GGCX      | 1682 | 1835 | 8.58360818388 |               |
| NM_000821    | GGCX      | 3028 | 3079 | 6.32954397305 |               |
| NM_000821    | GGCX      | 202  | 308  | 6.99864568316 |               |
| NM_000821    | GGCX      | 2057 | 2155 | 7.99864568316 |               |
| NM_000821    | GGCX      | 2169 | 2432 | 9.87311480107 |               |
| NM_000821    | GGCX      | 451  | 1105 | 11.6035077413 |               |
| NM_000821    | GGCX      | 1335 | 1584 | 9.80600060521 |               |
| NM_001136562 | AKAP2     | 391  | 423  | 8.7287408677  |               |
| NM_001136562 | AKAP2     | 293  | 344  | 7.73258471755 |               |
| NM_001136562 | AKAP2     | 1611 | 1670 | 7.73275846787 |               |
| NM_001136562 | AKAP2     | 2927 | 2997 | 7.73275173682 |               |
| NM_001136562 | AKAP2     | 1869 | 1906 | 6.64861925849 |               |
| NM_001136562 | AKAP2     | 5654 | 5715 | 7.7287408677  |               |
| NM_001136562 | AKAP2     | 957  | 996  | 6.64861925849 |               |
| NM_001136562 | AKAP2     | 1468 | 1554 | 9.54011338993 |               |
| NM_001136562 | AKAP2     | 2330 | 2407 | 7.7287408677  |               |
| NM_001136561 | LOC440563 |      | 527  | 596           | 7.77507588037 |
| NM_001136561 | LOC440563 |      | 321  | 347           | 6.1901133721  |
| NM_001136561 | LOC440563 |      | 485  | 521           | 5.19011314373 |
| NM_001136561 | LOC440563 |      | 819  | 869           | 6.1901133721  |
| NM_001136561 | LOC440563 |      | 426  | 470           | 6.19011337965 |
| NM_018255    | ELP2      | 2272 | 2344 | 3.64455887192 |               |
| NM_018255    | ELP2      | 633  | 682  | 3.56041989845 |               |
| NM_018255    | ELP2      | 1239 | 1326 | 5.64455910783 |               |
| NM_018255    | ELP2      | 506  | 570  | 5.64455910783 |               |
| NM_018255    | ELP2      | 1784 | 1827 | 4.56041989845 |               |
| NM_018255    | ELP2      | 2024 | 2107 | 3.64455887192 |               |
| NM_018255    | ELP2      | 1179 | 1229 | 5.22934785824 |               |
| NM_018255    | ELP2      | 370  | 491  | 5.64455910761 |               |
| NM_018255    | ELP2      | 1434 | 1536 | 4.64455910783 |               |

|              |       |      |      |               |
|--------------|-------|------|------|---------------|
| NM_018255    | ELP2  | 735  | 837  | 4.64455237678 |
| NM_006618    | KDM5B | 3301 | 3387 | 5.72693619547 |
| NM_006618    | KDM5B | 5267 | 5336 | 5.7229185953  |
| NM_006618    | KDM5B | 363  | 446  | 6.72693619547 |
| NM_006618    | KDM5B | 3919 | 3983 | 5.72693595955 |
| NM_006618    | KDM5B | 1474 | 1523 | 5.72693595955 |
| NM_006618    | KDM5B | 2625 | 2650 | 4.72676244515 |
| NM_006618    | KDM5B | 2379 | 2418 | 6.31172494587 |
| NM_006618    | KDM5B | 2202 | 2262 | 6.31172494587 |
| NM_006618    | KDM5B | 3260 | 3300 | 6.7229185953  |
| NM_006618    | KDM5B | 5432 | 5479 | 5.64279698609 |
| NM_006618    | KDM5B | 710  | 772  | 5.7229185953  |
| NM_006618    | KDM5B | 3774 | 3862 | 4.72676244515 |
| NM_006618    | KDM5B | 537  | 592  | 4.72676244515 |
| NM_006618    | KDM5B | 2320 | 2370 | 6.72693618792 |
| NM_006618    | KDM5B | 5921 | 5990 | 6.7229185953  |
| NM_006618    | KDM5B | 3866 | 3912 | 5.7229185953  |
| NM_006618    | KDM5B | 1710 | 1834 | 5.72693619547 |
| NM_006618    | KDM5B | 1552 | 1642 | 4.72693619547 |
| NM_006618    | KDM5B | 1156 | 1246 | 5.72676244515 |
| NM_006618    | KDM5B | 4049 | 4117 | 6.72693619525 |
| NM_006618    | KDM5B | 1879 | 1964 | 5.72693619546 |
| NM_006618    | KDM5B | 823  | 889  | 4.72692946442 |
| NM_006618    | KDM5B | 1992 | 2200 | 7.72693619547 |
| NM_006618    | KDM5B | 2654 | 2836 | 7.31189869619 |
| NM_006618    | KDM5B | 264  | 349  | 5.72692946442 |
| NM_001193272 | RBBP5 | 568  | 640  | 7.77062816883 |
| NM_001193272 | RBBP5 | 1196 | 1265 | 7.18549192534 |
| NM_001193272 | RBBP5 | 413  | 459  | 7.10152646627 |
| NM_001193272 | RBBP5 | 2794 | 2877 | 7.18549192534 |
| NM_006612    | KIF1C | 3483 | 3520 | 3.2219005442  |
| NM_006612    | KIF1C | 2735 | 2788 | 4.2219005442  |
| NM_006612    | KIF1C | 305  | 400  | 5.54382887501 |
| NM_006612    | KIF1C | 2532 | 2603 | 3.2219005442  |
| NM_006612    | KIF1C | 2854 | 2909 | 3.21788317995 |
| NM_006612    | KIF1C | 4142 | 4207 | 4.80686328084 |
| NM_006612    | KIF1C | 2605 | 2705 | 4.80686328084 |
| NM_006612    | KIF1C | 6813 | 6841 | 3.22189404907 |
| NM_006612    | KIF1C | 779  | 837  | 4.80686328084 |
| NM_006612    | KIF1C | 2979 | 3049 | 3.21788317995 |
| NM_006612    | KIF1C | 3394 | 3442 | 3.21788317995 |
| NM_006612    | KIF1C | 5492 | 5543 | 4.72272407146 |
| NM_006612    | KIF1C | 4838 | 4879 | 4.21788317995 |
| NM_006612    | KIF1C | 1407 | 1544 | 6.54382887501 |
| NM_006612    | KIF1C | 4434 | 4467 | 3.13776157074 |
| NM_006612    | KIF1C | 1165 | 1386 | 7.30936362137 |
| NM_006612    | KIF1C | 4034 | 4110 | 3.22190078012 |
| NM_006612    | KIF1C | 1803 | 1911 | 5.54382887501 |
| NM_006612    | KIF1C | 6649 | 6687 | 3.2217270298  |
| NM_006612    | KIF1C | 2183 | 2429 | 6.80686328084 |



|              |          |      |      |                    |
|--------------|----------|------|------|--------------------|
| NM_006612    | KIF1C    | 3126 | 3235 | 6.02925570218      |
| NM_006612    | KIF1C    | 1615 | 1802 | 5.80686328084      |
| NM_006612    | KIF1C    | 500  | 769  | 6.92234049826      |
| NM_006612    | KIF1C    | 1915 | 2145 | 7.12879137573      |
| NM_006612    | KIF1C    | 868  | 1121 | 7.02925570218      |
| NM_145246    | FRA10AC1 |      | 2350 | 2384 6.49429259817 |
| NM_145243    | OMA1     | 79   | 128  | 9.39487625867      |
| NM_145243    | OMA1     | 1266 | 1303 | 9.98384962851      |
| NM_145243    | OMA1     | 130  | 185  | 10.3987201085      |
| NM_006617    | NES      | 5080 | 5136 | 10.2507941349      |
| NM_006617    | NES      | 358  | 407  | 8.25079389901      |
| NM_006617    | NES      | 2552 | 2645 | 9.25079413493      |
| NM_006617    | NES      | 2708 | 2786 | 10.2507941347      |
| NM_006617    | NES      | 4206 | 4266 | 9.25079413493      |
| NM_006617    | NES      | 1020 | 1133 | 9.83575663565      |
| NM_006617    | NES      | 2093 | 2161 | 9.25078740388      |
| NM_006617    | NES      | 1692 | 1748 | 9.24677653476      |
| NM_006617    | NES      | 1168 | 1287 | 9.25079413493      |
| NM_006617    | NES      | 19   | 236  | 11.4207191364      |
| NM_006617    | NES      | 2253 | 2341 | 9.25079413493      |
| NM_001104647 | SLC25A36 |      | 4295 | 4345 7.35130690161 |
| NM_002755    | MAP2K1   | 1204 | 1247 | 6.23492628401      |
| NM_002755    | MAP2K1   | 2264 | 2315 | 6.55686110995      |
| NM_002755    | MAP2K1   | 1714 | 1763 | 5.23475926475      |
| NM_002755    | MAP2K1   | 1369 | 1432 | 5.81989551579      |
| NM_002755    | MAP2K1   | 155  | 208  | 4.23493277915      |
| NM_002755    | MAP2K1   | 491  | 611  | 5.81989551579      |
| NM_002755    | MAP2K1   | 2160 | 2219 | 6.55668735963      |
| NM_002755    | MAP2K1   | 2391 | 2447 | 4.15079380568      |
| NM_002755    | MAP2K1   | 1881 | 1929 | 5.81989551579      |
| NM_002755    | MAP2K1   | 1958 | 2025 | 6.23493301506      |
| NM_002755    | MAP2K1   | 1433 | 1492 | 6.23492628401      |
| NM_002755    | MAP2K1   | 1055 | 1165 | 5.81989551579      |
| NM_002755    | MAP2K1   | 634  | 732  | 5.23493301507      |
| NM_002755    | MAP2K1   | 876  | 1017 | 7.04228793712      |
| NM_002970    | SAT1     | 158  | 351  | 3.92195365947      |
| NM_002970    | SAT1     | 22   | 134  | 2.55938358008      |
| NM_002970    | SAT1     | 747  | 912  | 3.21146027666      |
| NM_002970    | SAT1     | 354  | 601  | 4.65891925363      |
| NM_002970    | SAT1     | 605  | 744  | 3.45246837617      |
| NM_002970    | SAT1     | 921  | 1061 | 3.33699115875      |
| NM_002973    | ATXN2    | 1146 | 1199 | 6.70492440916      |
| NM_002973    | ATXN2    | 804  | 850  | 6.70108055931      |
| NM_002972    | SBF1     | 6139 | 6228 | 5.23045664032      |
| NM_002972    | SBF1     | 5442 | 5499 | 5.23028289755      |
| NM_002972    | SBF1     | 4140 | 4179 | 6.23045641195      |
| NM_002972    | SBF1     | 4985 | 5079 | 7.23045664786      |
| NM_002972    | SBF1     | 651  | 740  | 8.55238474275      |
| NM_002972    | SBF1     | 7745 | 7805 | 5.23045641195      |
| NM_002972    | SBF1     | 1076 | 1130 | 6.23045664786      |

|           |       |      |      |               |
|-----------|-------|------|------|---------------|
| NM_002972 | SBF1  | 2854 | 2902 | 7.23045664786 |
| NM_002972 | SBF1  | 1246 | 1317 | 5.23045641195 |
| NM_002972 | SBF1  | 5104 | 5172 | 6.23044991681 |
| NM_002972 | SBF1  | 3890 | 3956 | 5.23045664032 |
| NM_002972 | SBF1  | 1710 | 1780 | 6.23045664032 |
| NM_002972 | SBF1  | 4912 | 4974 | 5.23045664786 |
| NM_002972 | SBF1  | 5362 | 5415 | 6.23028289755 |
| NM_002972 | SBF1  | 3090 | 3163 | 6.23045664786 |
| NM_002972 | SBF1  | 2517 | 2570 | 5.22643904769 |
| NM_002972 | SBF1  | 3585 | 3738 | 5.23045664786 |
| NM_002972 | SBF1  | 2323 | 2439 | 7.81541914859 |
| NM_002972 | SBF1  | 4705 | 4771 | 6.23045664786 |
| NM_002972 | SBF1  | 2589 | 2730 | 7.55238474275 |
| NM_002972 | SBF1  | 563  | 637  | 7.55238474275 |
| NM_002972 | SBF1  | 4790 | 4903 | 6.23045664786 |
| NM_002972 | SBF1  | 4380 | 4648 | 8.93089636601 |
| NM_002972 | SBF1  | 1412 | 1535 | 8.23045664786 |
| NM_002972 | SBF1  | 1535 | 1590 | 6.23045664032 |
| NM_002972 | SBF1  | 5656 | 5823 | 9.03781156992 |
| NM_002972 | SBF1  | 387  | 495  | 7.55238474275 |
| NM_002972 | SBF1  | 3170 | 3289 | 5.23045664786 |
| NM_002972 | SBF1  | 2030 | 2228 | 8.23045664786 |
| NM_002972 | SBF1  | 900  | 980  | 5.23045664786 |
| NM_020216 | RNPEP | 1380 | 1426 | 9.60507471108 |
| NM_020216 | RNPEP | 113  | 175  | 8.60507471108 |
| NM_020216 | RNPEP | 2107 | 2147 | 8.1900372118  |
| NM_020216 | RNPEP | 1939 | 1987 | 7.60507471086 |
| NM_020216 | RNPEP | 714  | 789  | 8.19003048075 |
| NM_020216 | RNPEP | 913  | 985  | 7.60507471108 |
| NM_020216 | RNPEP | 2046 | 2096 | 7.5209355017  |
| NM_020216 | RNPEP | 80   | 110  | 6.5209355017  |
| NM_020216 | RNPEP | 1448 | 1531 | 7.60507471108 |
| NM_020216 | RNPEP | 817  | 899  | 9.41242963314 |
| NM_002977 | SCN9A | 9682 | 9729 | 6.18687433129 |
| NM_002977 | SCN9A | 5475 | 5533 | 6.27101354045 |
| NM_002977 | SCN9A | 2572 | 2634 | 5.27101354068 |
| NM_002977 | SCN9A | 4456 | 4514 | 6.27083979036 |
| NM_002977 | SCN9A | 2466 | 2492 | 6.18687433129 |
| NM_002977 | SCN9A | 5962 | 6012 | 5.27100680962 |
| NM_002977 | SCN9A | 1039 | 1167 | 7.8559760414  |
| NM_002977 | SCN9A | 4068 | 4162 | 6.85597604139 |
| NM_002977 | SCN9A | 880  | 926  | 5.18687433129 |
| NM_002977 | SCN9A | 5607 | 5646 | 5.18687433129 |
| NM_002977 | SCN9A | 4610 | 4667 | 6.85596931034 |
| NM_002977 | SCN9A | 3959 | 4037 | 6.27100680962 |
| NM_002977 | SCN9A | 347  | 449  | 7.8559760414  |
| NM_002977 | SCN9A | 4212 | 4260 | 6.18687433129 |
| NM_002977 | SCN9A | 4535 | 4600 | 5.18687433129 |
| NM_002977 | SCN9A | 5253 | 5366 | 8.07836846273 |
| NM_002977 | SCN9A | 3577 | 3657 | 5.2669959405  |

|              |         |      |      |               |
|--------------|---------|------|------|---------------|
| NM_002977    | SCN9A   | 2680 | 2731 | 5.27083979036 |
| NM_002977    | SCN9A   | 4930 | 5044 | 7.59294163556 |
| NM_002977    | SCN9A   | 2213 | 2281 | 6.77183683201 |
| NM_002977    | SCN9A   | 1517 | 1640 | 6.27101354068 |
| NM_002977    | SCN9A   | 2930 | 3067 | 8.07836846273 |
| NM_002977    | SCN9A   | 2308 | 2430 | 6.8559760414  |
| NM_002977    | SCN9A   | 734  | 826  | 5.27101354045 |
| NM_002977    | SCN9A   | 2858 | 2909 | 5.2669959405  |
| NM_002977    | SCN9A   | 3076 | 3212 | 7.8559760414  |
| NM_002752    | MAPK9   | 1039 | 1153 | 4.99789244454 |
| NM_002752    | MAPK9   | 231  | 278  | 6.58286166877 |
| NM_002752    | MAPK9   | 3712 | 3826 | 6.99789917559 |
| NM_002752    | MAPK9   | 748  | 796  | 6.99772542528 |
| NM_031475    | ESPN    | 2197 | 2253 | 6.51771832892 |
| NM_031475    | ESPN    | 2324 | 2383 | 7.51771832892 |
| NM_031475    | ESPN    | 2100 | 2165 | 6.51789184332 |
| NM_031475    | ESPN    | 3275 | 3339 | 7.51788534818 |
| NM_031479    | INHBE   | 2242 | 2311 | 8.60554254552 |
| NM_031479    | INHBE   | 1383 | 1521 | 9.60554254552 |
| NM_031479    | INHBE   | 1525 | 1567 | 6.01656244462 |
| NM_031479    | INHBE   | 872  | 908  | 7.02057331374 |
| NM_031479    | INHBE   | 288  | 330  | 6.01656244462 |
| NM_031479    | INHBE   | 1864 | 2014 | 8.34250813969 |
| NM_031479    | INHBE   | 221  | 281  | 8.34250813969 |
| NM_031479    | INHBE   | 2031 | 2156 | 8.82793496686 |
| NM_031479    | INHBE   | 2338 | 2431 | 8.60554254552 |
| NM_031479    | INHBE   | 923  | 1036 | 8.60554254552 |
| NM_031479    | INHBE   | 498  | 872  | 10.9747763552 |
| NM_031479    | INHBE   | 59   | 220  | 8.82793496686 |
| NM_031479    | INHBE   | 1092 | 1381 | 10.6055425455 |
| NM_031479    | INHBE   | 334  | 498  | 8.82793496686 |
| NM_001964    | EGR1    | 284  | 347  | 10.099717617  |
| NM_024635    | NAA35   | 1891 | 1980 | 6.78810543906 |
| NM_024635    | NAA35   | 1318 | 1357 | 5.78810543906 |
| NM_024635    | NAA35   | 573  | 615  | 5.70798382985 |
| NM_024635    | NAA35   | 1161 | 1252 | 7.79211630818 |
| NM_024635    | NAA35   | 1372 | 1450 | 7.79212303923 |
| NM_024632    | SAP30L  | 2157 | 2178 | 3.95384496843 |
| NM_024632    | SAP30L  | 1148 | 1180 | 3.86970599496 |
| NM_024630    | ZDHHC14 | 2703 | 2776 | 8.44833978386 |
| NM_024630    | ZDHHC14 | 988  | 1030 | 9.44432891474 |
| NM_024630    | ZDHHC14 | 704  | 758  | 9.44432891474 |
| NM_020745    | AARS2   | 1011 | 1079 | 7.53231482307 |
| NM_020745    | AARS2   | 478  | 552  | 9.11745107411 |
| NM_020745    | AARS2   | 712  | 764  | 7.448349364   |
| NM_024638    | QTRTD1  | 1879 | 1961 | 8.84052063078 |
| NM_024638    | QTRTD1  | 347  | 388  | 7.25154726094 |
| NM_024638    | QTRTD1  | 582  | 642  | 8.25154726094 |
| NM_024639    | ZNF322  | 4410 | 4483 | 7.42809867177 |
| NM_001123329 | ZBTB1   | 2571 | 2637 | 6.56847472141 |

|              |         |      |      |               |
|--------------|---------|------|------|---------------|
| NM_001123329 | ZBTB1   | 2765 | 2813 | 5.56847472141 |
| NM_001123329 | ZBTB1   | 1418 | 1523 | 7.56848145247 |
| NM_001123329 | ZBTB1   | 1995 | 2065 | 6.56446385229 |
| NM_001123329 | ZBTB1   | 959  | 1089 | 6.56848144492 |
| NM_001033572 | AMZ2    | 837  | 874  | 4.19206585693 |
| NM_001145838 | MTFR1   | 1146 | 1205 | 6.93628822781 |
| NM_001142403 | CD164   | 583  | 668  | 8.45348080159 |
| NM_001142403 | CD164   | 672  | 705  | 6.75304108323 |
| NM_001142403 | CD164   | 2438 | 2500 | 4.75304108344 |
| NM_001142403 | CD164   | 2215 | 2294 | 7.56039600551 |
| NM_001142403 | CD164   | 1127 | 1212 | 7.07496917834 |
| NM_001142403 | CD164   | 1329 | 1473 | 8.92296608489 |
| NM_001142403 | CD164   | 1938 | 2021 | 5.75304108345 |
| NM_001142403 | CD164   | 1813 | 1905 | 7.33800358417 |
| NM_001142403 | CD164   | 107  | 544  | 10.6599316791 |
| NM_001142403 | CD164   | 1518 | 1598 | 7.07496917834 |
| NM_001142403 | CD164   | 805  | 1111 | 8.45348080159 |
| NM_001142403 | CD164   | 1667 | 1811 | 7.75304108345 |
| NM_001142403 | CD164   | 2387 | 2434 | 4.66890187406 |
| NM_001142403 | CD164   | 2044 | 2111 | 4.75303435239 |
| NM_031216    | SEH1L   | 1189 | 1260 | 6.42075349731 |
| NM_031216    | SEH1L   | 408  | 512  | 7.6431459262  |
| NM_031216    | SEH1L   | 855  | 945  | 6.42075350486 |
| NM_031216    | SEH1L   | 668  | 732  | 6.4207467738  |
| NM_031216    | SEH1L   | 3119 | 3163 | 5.83561725382 |
| NM_031216    | SEH1L   | 246  | 378  | 7.83579100414 |
| NM_031216    | SEH1L   | 959  | 1062 | 6.83579100414 |
| NM_031216    | SEH1L   | 744  | 807  | 6.41673590469 |
| NM_001136159 | OTUD5   | 329  | 370  | 3.5465127049  |
| NM_001136159 | OTUD5   | 972  | 1019 | 4.5465127049  |
| NM_001136159 | OTUD5   | 1345 | 1423 | 4.54668645522 |
| NM_001136159 | OTUD5   | 181  | 253  | 4.54668645521 |
| NM_001136159 | OTUD5   | 268  | 322  | 3.5465127049  |
| NM_031215    | CABLES2 | 1635 | 1724 | 8.78091348967 |
| NM_031210    | SLIRP   | 77   | 183  | 6.14390039106 |
| NM_031210    | SLIRP   | 184  | 281  | 5.49182369448 |
| NM_031210    | SLIRP   | 302  | 384  | 2.68446877242 |
| NM_001145345 | ZNF566  | 4718 | 4805 | 8.87166092106 |
| NM_001136153 | ATF6B   | 755  | 811  | 8.67871722763 |
| NM_001136153 | ATF6B   | 1743 | 1813 | 9.26367972835 |
| NM_001136153 | ATF6B   | 1063 | 1107 | 8.67469986338 |
| NM_001136153 | ATF6B   | 2111 | 2169 | 7.6787107325  |
| NM_001136153 | ATF6B   | 1439 | 1475 | 7.67469986338 |
| NM_001136153 | ATF6B   | 2313 | 2415 | 8.67871746355 |
| NM_001136153 | ATF6B   | 1484 | 1586 | 10.0006455584 |
| NM_001136153 | ATF6B   | 1178 | 1373 | 11.1381490822 |
| NM_001136153 | ATF6B   | 1899 | 1984 | 8.678717456   |
| NM_001136153 | ATF6B   | 184  | 351  | 10.4860723856 |
| NM_001136153 | ATF6B   | 392  | 590  | 10.6787174635 |
| NM_001136153 | ATF6B   | 30   | 115  | 8.678717456   |

|              |           |      |      |                   |
|--------------|-----------|------|------|-------------------|
| NM_001136156 | ZNF507    | 1596 | 1684 | 7.32081106495     |
| NM_031219    | HDHD3     | 557  | 619  | 6.79893636714     |
| NM_178561    | CTAGE6P   | 261  | 310  | 10.2885727202     |
| NM_178562    | TSPAN33   | 715  | 774  | 9.54419763088     |
| NM_178562    | TSPAN33   | 503  | 624  | 10.3555701531     |
| NM_021814    | ELOVL5    | 1752 | 1811 | 6.15789169566     |
| NM_021814    | ELOVL5    | 1847 | 1927 | 7.15789193158     |
| NM_021814    | ELOVL5    | 2107 | 2267 | 10.1578919316     |
| NM_021814    | ELOVL5    | 1581 | 1645 | 8.15789193158     |
| NM_021814    | ELOVL5    | 196  | 241  | 7.73883683213     |
| NM_021814    | ELOVL5    | 1957 | 2091 | 8.7428544323      |
| NM_021814    | ELOVL5    | 2405 | 2602 | 9.96524685364     |
| NM_021814    | ELOVL5    | 2707 | 2786 | 7.7428544323      |
| NM_021814    | ELOVL5    | 351  | 993  | 12.9523077979     |
| NM_021814    | ELOVL5    | 999  | 1569 | 11.8303172736     |
| NM_178566    | ZDHHC21   | 777  | 944  | 11.2365377017     |
| NM_001961    | EEF2      | 0    | 210  | 3.64937132237     |
| NM_001961    | EEF2      | 3025 | 3158 | 1.94893160423     |
| NM_001961    | EEF2      | 2488 | 2564 | 1.27085969912     |
| NM_001961    | EEF2      | 2296 | 2487 | 3.34124902701     |
| NM_001961    | EEF2      | 1559 | 2271 | 5.03639444548     |
| NM_001961    | EEF2      | 2583 | 2992 | 3.64937132237     |
| NM_001961    | EEF2      | 215  | 1559 | 6.51878721256     |
| NM_018157    | RIC8B     | 1638 | 1694 | 8.00532354805     |
| NM_018157    | RIC8B     | 1513 | 1539 | 7.92520193884     |
| NM_000992    | RPL29     | 554  | 623  | 4.69008955176     |
| NM_000992    | RPL29     | 74   | 115  | 2.10512031998     |
| NM_000992    | RPL29     | 122  | 237  | 3.10512705104     |
| NM_032848    | C12orf52  |      | 6    | 33 8.28414138849  |
| NM_001039848 | GPX4      | 727  | 787  | 3.5797204189      |
| NM_001039848 | GPX4      | 836  | 893  | 3.49575495984     |
| NM_001039848 | GPX4      | 418  | 589  | 6.90182226411     |
| NM_001039848 | GPX4      | 284  | 396  | 6.74981917066     |
| NM_001039848 | GPX4      | 672  | 727  | 3.5798939333      |
| NM_001039842 | C17orf90  |      | 378  | 455 8.89176478086 |
| NM_001039841 | ARHGAP11B |      | 602  | 654 8.35736713265 |
| NM_001039841 | ARHGAP11B |      | 847  | 896 8.35352328279 |
| NM_014712    | SETD1A    | 5024 | 5082 | 6.35980647307     |
| NM_014712    | SETD1A    | 1290 | 1360 | 7.35980647307     |
| NM_014712    | SETD1A    | 1705 | 1779 | 7.35998022338     |
| NM_014712    | SETD1A    | 4935 | 4997 | 7.94476897379     |
| NM_014712    | SETD1A    | 6063 | 6134 | 7.35980647307     |
| NM_014712    | SETD1A    | 4523 | 4568 | 6.35596262322     |
| NM_014712    | SETD1A    | 2390 | 2437 | 6.275841014       |
| NM_014712    | SETD1A    | 2644 | 2700 | 6.35596262322     |
| NM_014241    | PTPLA     | 852  | 933  | 12.2738628422     |
| NM_014241    | PTPLA     | 521  | 618  | 13.0108284364     |
| NM_014241    | PTPLA     | 643  | 726  | 12.8588253429     |
| NM_014241    | PTPLA     | 320  | 371  | 9.68488274133     |
| NM_014241    | PTPLA     | 393  | 502  | 13.0108284364     |

|           |         |       |       |               |
|-----------|---------|-------|-------|---------------|
| NM_005999 | TSNAX   | 510   | 560   | 5.80736732012 |
| NM_005999 | TSNAX   | 589   | 663   | 5.89150652195 |
| NM_005999 | TSNAX   | 311   | 405   | 7.21343462439 |
| NM_005999 | TSNAX   | 414   | 474   | 4.80736732012 |
| NM_005999 | TSNAX   | 70    | 125   | 5.88748892933 |
| NM_014245 | RNF7    | 227   | 291   | 5.3443050558  |
| NM_014245 | RNF7    | 302   | 409   | 5.92926755653 |
| NM_014245 | RNF7    | 572   | 669   | 5.92926755653 |
| NM_014246 | CELSR1  | 8855  | 8939  | 14.2433473974 |
| NM_014246 | CELSR1  | 5879  | 5951  | 14.243347405  |
| NM_014246 | CELSR1  | 5695  | 5761  | 13.243347405  |
| NM_014246 | CELSR1  | 863   | 929   | 14.2431736547 |
| NM_014246 | CELSR1  | 5585  | 5648  | 15.2433474048 |
| NM_014246 | CELSR1  | 2746  | 2829  | 14.8281361554 |
| NM_014246 | CELSR1  | 7221  | 7265  | 13.2433471691 |
| NM_014246 | CELSR1  | 8001  | 8065  | 13.243347405  |
| NM_014246 | CELSR1  | 7493  | 7617  | 14.8283099057 |
| NM_014246 | CELSR1  | 4466  | 4518  | 13.2393298048 |
| NM_014246 | CELSR1  | 4655  | 4711  | 14.8242923055 |
| NM_014246 | CELSR1  | 9512  | 9556  | 14.8242923055 |
| NM_014246 | CELSR1  | 3816  | 3888  | 14.2433474048 |
| NM_014246 | CELSR1  | 9808  | 9866  | 14.243347405  |
| NM_014246 | CELSR1  | 2976  | 3018  | 14.2393298048 |
| NM_014246 | CELSR1  | 10801 | 10875 | 13.2433471691 |
| NM_014246 | CELSR1  | 5309  | 5414  | 15.8283099057 |
| NM_014246 | CELSR1  | 3902  | 3965  | 14.2433473974 |
| NM_014246 | CELSR1  | 4994  | 5139  | 15.5652754999 |
| NM_014246 | CELSR1  | 10341 | 10402 | 13.2433473974 |
| NM_014246 | CELSR1  | 2450  | 2579  | 15.5652754999 |
| NM_014246 | CELSR1  | 9557  | 9667  | 15.5652754999 |
| NM_014246 | CELSR1  | 3501  | 3608  | 15.243347405  |
| NM_014246 | CELSR1  | 6713  | 6778  | 13.2431736547 |
| NM_014246 | CELSR1  | 1375  | 1471  | 14.243347405  |
| NM_014246 | CELSR1  | 3059  | 3220  | 16.243347405  |
| NM_014246 | CELSR1  | 3258  | 3344  | 14.2433473974 |
| NM_014246 | CELSR1  | 1899  | 1983  | 14.2433474048 |
| NM_014246 | CELSR1  | 7339  | 7475  | 14.243347405  |
| NM_032847 | C8orf76 | 764   | 839   | 8.83151055857 |
| NM_032847 | C8orf76 | 681   | 736   | 9.41664007855 |
| NM_032847 | C8orf76 | 1035  | 1121  | 7.82766670871 |
| NM_014248 | RBX1    | 51    | 88    | 6.66395296876 |
| NM_014248 | RBX1    | 429   | 541   | 8.66797056893 |
| NM_014248 | RBX1    | 326   | 380   | 5.66779681861 |
| NM_014248 | RBX1    | 106   | 224   | 8.98989866382 |
| NM_014248 | RBX1    | 242   | 322   | 7.25293306965 |
| NM_005993 | TBCD    | 580   | 629   | 5.34693334843 |
| NM_005996 | TBX3    | 70    | 100   | 6.12946370334 |
| NM_005996 | TBX3    | 3152  | 3221  | 6.04532449396 |
| NM_005997 | VPS72   | 442   | 490   | 5.1058800003  |
| NM_005997 | VPS72   | 636   | 698   | 5.1058867238  |

|              |          |      |      |               |               |
|--------------|----------|------|------|---------------|---------------|
| NM_005997    | VPS72    | 199  | 282  | 5.69084923207 |               |
| NM_005997    | VPS72    | 942  | 1006 | 4.02174752197 |               |
| NM_005997    | VPS72    | 751  | 867  | 6.91324165341 |               |
| NM_005997    | VPS72    | 1234 | 1321 | 6.42781482624 |               |
| NM_001042635 | NGDN     | 841  | 948  | 3.51208931273 |               |
| NM_001042635 | NGDN     | 1038 | 1091 | 4.0970518059  |               |
| NM_001042635 | NGDN     | 324  | 387  | 3.42795010334 |               |
| NM_001042635 | NGDN     | 730  | 809  | 3.51208930518 |               |
| NM_001198963 | FKTN     | 578  | 624  | 8.36990305654 |               |
| NM_024066    | ERI3     | 799  | 857  | 6.15034682735 |               |
| NM_024066    | ERI3     | 957  | 986  | 4.4812451248  |               |
| NM_001007793 | BUB3     | 654  | 762  | 6.85899020113 |               |
| NM_001007793 | BUB3     | 977  | 1091 | 6.59595579529 |               |
| NM_001007793 | BUB3     | 1275 | 1504 | 8.08138262246 |               |
| NM_001007793 | BUB3     | 210  | 271  | 4.27402770018 |               |
| NM_001007793 | BUB3     | 420  | 651  | 7.73345931904 |               |
| NM_001007793 | BUB3     | 817  | 970  | 5.85899020113 |               |
| NM_001007793 | BUB3     | 315  | 412  | 3.27402770041 |               |
| NM_001007793 | BUB3     | 1094 | 1225 | 5.59595579529 |               |
| NM_001007067 | SDCBP    | 787  | 851  | 4.66097875475 |               |
| NM_001007067 | SDCBP    | 694  | 780  | 5.33905089578 |               |
| NM_001007067 | SDCBP    | 600  | 684  | 3.9240133965  |               |
| NM_001007067 | SDCBP    | 1158 | 1237 | 4.66097899066 |               |
| NM_001007067 | SDCBP    | 199  | 340  | 5.66097899066 |               |
| NM_001007067 | SDCBP    | 1270 | 1313 | 3.92400666544 |               |
| NM_001007067 | SDCBP    | 1958 | 2033 | 4.33904416472 |               |
| NM_001007067 | SDCBP    | 417  | 551  | 5.33905089578 |               |
| NM_001007067 | SDCBP    | 851  | 1134 | 6.14640581783 |               |
| NM_001195098 | ANKRD28  | 4038 | 4124 | 6.54642655793 |               |
| NM_001195098 | ANKRD28  | 3301 | 3345 | 8.13138905865 |               |
| NM_001195098 | ANKRD28  | 1072 | 1148 | 7.54642655793 |               |
| NM_001195098 | ANKRD28  | 2149 | 2236 | 8.13539992777 |               |
| NM_001195098 | ANKRD28  | 903  | 1000 | 7.55044415811 |               |
| NM_005192    | CDKN3    | 239  | 327  | 8.91551440147 |               |
| NM_005192    | CDKN3    | 527  | 609  | 8.65247999563 |               |
| NM_005190    | CCNC     | 2079 | 2144 | 5.57622287616 |               |
| NM_005190    | CCNC     | 851  | 906  | 6.16118537688 |               |
| NM_005190    | CCNC     | 580  | 645  | 6.16119210039 |               |
| NM_005190    | CCNC     | 266  | 313  | 5.5760558569  |               |
| NM_005190    | CCNC     | 751  | 792  | 5.5760558569  |               |
| NM_152259    | C15orf42 |      | 2477 | 2516          | 9.12197580368 |
| NM_152259    | C15orf42 |      | 2010 | 2065          | 10.1219758037 |
| NM_152259    | C15orf42 |      | 4448 | 4504          | 10.1258196535 |
| NM_152259    | C15orf42 |      | 5334 | 5392          | 9.12581965353 |
| NM_152259    | C15orf42 |      | 2312 | 2375          | 10.7109491735 |
| NM_001114394 | PAPD4    | 1492 | 1533 | 5.63353122386 |               |
| NM_001114394 | PAPD4    | 2112 | 2162 | 5.71365283307 |               |
| NM_001114397 | DHX36    | 2797 | 2874 | 6.28169017474 |               |
| NM_001114397 | DHX36    | 35   | 112  | 6.28151642443 |               |
| NM_001114397 | DHX36    | 3193 | 3254 | 5.86665266792 |               |

|              |        |      |      |               |
|--------------|--------|------|------|---------------|
| NM_001114397 | DHX36  | 918  | 966  | 5.28168993883 |
| NM_001114397 | DHX36  | 1115 | 1164 | 4.27767257457 |
| NM_001114397 | DHX36  | 2950 | 2994 | 6.28151642443 |
| NM_001114397 | DHX36  | 1842 | 1904 | 5.86664594441 |
| NM_001114397 | DHX36  | 2517 | 2563 | 4.28168344369 |
| NM_001114397 | DHX36  | 2290 | 2341 | 6.28168344369 |
| NM_001114397 | DHX36  | 2355 | 2422 | 4.28168344369 |
| NM_001114397 | DHX36  | 1406 | 1522 | 6.28169017474 |
| NM_001114397 | DHX36  | 3262 | 3309 | 5.27767257457 |
| NM_001114397 | DHX36  | 338  | 471  | 5.86665267547 |
| NM_001114397 | DHX36  | 2220 | 2273 | 5.27767257457 |
| NM_001114397 | DHX36  | 1528 | 1616 | 5.86665267547 |
| NM_001114397 | DHX36  | 1731 | 1824 | 5.86665243955 |
| NM_032741    | AGPAT1 | 221  | 347  | 10.1706524372 |
| NM_032741    | AGPAT1 | 1380 | 1444 | 7.00072070469 |
| NM_032741    | AGPAT1 | 447  | 492  | 8.00072743574 |
| NM_032741    | AGPAT1 | 932  | 1020 | 9.00072743575 |
| NM_032741    | AGPAT1 | 1084 | 1253 | 10.4601590544 |
| NM_032741    | AGPAT1 | 117  | 211  | 9.8080823578  |
| NM_032741    | AGPAT1 | 1812 | 1887 | 8.58568993647 |
| NM_152925    | CPNE1  | 1897 | 1985 | 5.16367581412 |
| NM_152925    | CPNE1  | 575  | 627  | 3.84174748331 |
| NM_152925    | CPNE1  | 709  | 772  | 4.84174771923 |
| NM_152925    | CPNE1  | 434  | 486  | 3.84174098817 |
| NM_152925    | CPNE1  | 1532 | 1598 | 4.42671021995 |
| NM_152925    | CPNE1  | 1389 | 1493 | 5.42671021995 |
| NM_152925    | CPNE1  | 1627 | 1707 | 2.83773011906 |
| NM_152925    | CPNE1  | 842  | 889  | 4.42670998403 |
| NM_152925    | CPNE1  | 154  | 187  | 2.83773011906 |
| NM_152925    | CPNE1  | 205  | 373  | 5.42671021995 |
| NM_152925    | CPNE1  | 897  | 1096 | 6.30117933787 |
| NM_152925    | CPNE1  | 1116 | 1262 | 5.42671021995 |
| NM_005198    | CHKB   | 1177 | 1264 | 6.14879942119 |
| NM_005198    | CHKB   | 1021 | 1088 | 5.14879942118 |
| NM_005198    | CHKB   | 891  | 959  | 5.14879942097 |
| NM_032747    | USMG5  | 480  | 554  | 4.77867403334 |
| NM_032747    | USMG5  | 39   | 108  | 4.77866730229 |
| NM_032747    | USMG5  | 353  | 476  | 6.36363653406 |
| NM_170784    | MKKS   | 2126 | 2195 | 8.38263749599 |
| NM_170784    | MKKS   | 363  | 409  | 6.79365739509 |
| NM_170784    | MKKS   | 258  | 321  | 9.38263749599 |
| NM_170784    | MKKS   | 410  | 470  | 9.11960309015 |
| NM_170784    | MKKS   | 2355 | 2416 | 6.71353578588 |
| NM_170784    | MKKS   | 58   | 250  | 10.4981147134 |
| NM_170784    | MKKS   | 1998 | 2094 | 6.79767498772 |
| NM_170783    | ZNRD1  | 309  | 360  | 4.89825581161 |
| NM_053024    | PFN2   | 979  | 1023 | 5.29031984887 |
| NM_053024    | PFN2   | 318  | 378  | 4.28630225625 |
| NM_053024    | PFN2   | 1817 | 1861 | 3.20618064704 |
| NM_053024    | PFN2   | 232  | 300  | 4.2903196205  |



|              |         |      |      |               |
|--------------|---------|------|------|---------------|
| NM_053024    | PFN2    | 60   | 156  | 5.61224795131 |
| NM_053024    | PFN2    | 696  | 750  | 4.28630225625 |
| NM_053024    | PFN2    | 1751 | 1810 | 4.28630225625 |
| NM_053026    | MYLK    | 1660 | 1690 | 7.22735005117 |
| NM_053023    | ZFP91   | 1367 | 1410 | 6.70362519423 |
| NM_053023    | ZFP91   | 1851 | 1934 | 7.2926052949  |
| NM_053023    | ZFP91   | 2337 | 2383 | 6.70362519423 |
| NM_053023    | ZFP91   | 1275 | 1314 | 5.62350358502 |
| NM_053023    | ZFP91   | 2189 | 2245 | 6.70764278685 |
| NM_053023    | ZFP91   | 2807 | 2854 | 5.62350358502 |
| NM_053023    | ZFP91   | 4529 | 4660 | 8.02957088929 |
| NM_053023    | ZFP91   | 2999 | 3122 | 5.70764255848 |
| NM_016589    | TIMMDC1 | 655  | 711  | 4.60296195426 |
| NM_016589    | TIMMDC1 | 713  | 827  | 5.60296219018 |
| NM_016589    | TIMMDC1 | 228  | 310  | 5.60296219018 |
| NM_016589    | TIMMDC1 | 1185 | 1275 | 3.60296218263 |
| NM_016589    | TIMMDC1 | 551  | 649  | 5.60296218263 |
| NM_016589    | TIMMDC1 | 1046 | 1131 | 3.60296219017 |
| NM_016589    | TIMMDC1 | 99   | 158  | 5.18792445498 |
| NM_016589    | TIMMDC1 | 355  | 424  | 5.18792469067 |
| NM_016589    | TIMMDC1 | 832  | 954  | 5.1879246909  |
| NM_015294    | TRIM37  | 4386 | 4463 | 6.78887969246 |
| NM_001099666 | PTAR1   | 9072 | 9124 | 7.7689775089  |
| NM_001099666 | PTAR1   | 1417 | 1483 | 6.7689775089  |
| NM_001099666 | PTAR1   | 3557 | 3621 | 7.7691510233  |
| NM_001099666 | PTAR1   | 8826 | 8919 | 9.35411375994 |
| NM_001099666 | PTAR1   | 306  | 380  | 7.76513365905 |
| NM_001099661 | EIF3CL  | 1938 | 1985 | 2.20977720806 |
| NM_001099661 | EIF3CL  | 600  | 685  | 4.20978393911 |
| NM_001099661 | EIF3CL  | 798  | 856  | 2.20576633894 |
| NM_001099661 | EIF3CL  | 2075 | 2168 | 3.79474643983 |
| NM_001099661 | EIF3CL  | 1202 | 1268 | 4.20978393911 |
| NM_001099661 | EIF3CL  | 1994 | 2068 | 2.20978393889 |
| NM_001099661 | EIF3CL  | 1276 | 1565 | 6.91022365725 |
| NM_001099661 | EIF3CL  | 1685 | 1921 | 6.20978393911 |
| NM_001099661 | EIF3CL  | 1000 | 1194 | 5.79474643983 |
| NM_001099661 | EIF3CL  | 2814 | 2924 | 5.01713886117 |
| NM_001099661 | EIF3CL  | 2623 | 2663 | 2.12564472973 |
| NM_001099661 | EIF3CL  | 690  | 781  | 3.20978393911 |
| NM_001099661 | EIF3CL  | 403  | 537  | 5.531712034   |
| NM_001099661 | EIF3CL  | 869  | 963  | 3.20978393911 |
| NM_001099661 | EIF3CL  | 132  | 401  | 5.20978393911 |
| NM_001099661 | EIF3CL  | 2276 | 2617 | 6.66921555775 |
| NM_001048200 | HIPK3   | 7373 | 7423 | 6.22949323698 |
| NM_001048200 | HIPK3   | 2505 | 2550 | 6.30961484619 |
| NM_001048200 | HIPK3   | 3209 | 3237 | 5.22949323698 |
| NM_001048200 | HIPK3   | 3330 | 3405 | 6.89457734691 |
| NM_001048200 | HIPK3   | 4863 | 4931 | 5.30961484619 |
| NM_001048200 | HIPK3   | 5348 | 5423 | 5.31345869604 |
| NM_001048200 | HIPK3   | 4322 | 4395 | 7.31363243881 |

|              |          |      |      |               |               |
|--------------|----------|------|------|---------------|---------------|
| NM_001003791 | ERLIN2   | 319  | 395  | 9.71741349498 |               |
| NM_001003791 | ERLIN2   | 397  | 458  | 9.12843339409 |               |
| NM_001003791 | ERLIN2   | 463  | 533  | 10.1324507583 |               |
| NM_001003791 | ERLIN2   | 48   | 225  | 11.4543790892 |               |
| NM_014341    | MTCH1    | 485  | 523  | 5.39441635098 |               |
| NM_014341    | MTCH1    | 1547 | 1636 | 7.3944165869  |               |
| NM_014341    | MTCH1    | 1637 | 1677 | 5.39424283658 |               |
| NM_014341    | MTCH1    | 746  | 920  | 9.3944165869  |               |
| NM_014341    | MTCH1    | 2110 | 2197 | 7.71634468179 |               |
| NM_014341    | MTCH1    | 1759 | 1831 | 6.97937235657 |               |
| NM_014341    | MTCH1    | 603  | 658  | 6.97937908007 |               |
| NM_014341    | MTCH1    | 1962 | 2061 | 7.3944165869  |               |
| NM_014341    | MTCH1    | 1036 | 1204 | 7.97937908762 |               |
| NM_014341    | MTCH1    | 1260 | 1529 | 9.48187942815 |               |
| NM_014341    | MTCH1    | 920  | 1020 | 7.3944165869  |               |
| NM_001111067 | ACVR1    | 1105 | 1164 | 9.08999471869 |               |
| NM_001111067 | ACVR1    | 984  | 1024 | 9.09401231886 |               |
| NM_001111067 | ACVR1    | 1687 | 1753 | 9.09383856855 |               |
| NM_001111067 | ACVR1    | 1558 | 1602 | 8.00987310948 |               |
| NM_001111067 | ACVR1    | 347  | 408  | 8.00987310948 |               |
| NM_001111067 | ACVR1    | 765  | 894  | 10.4159404138 |               |
| NM_001111067 | ACVR1    | 1942 | 2030 | 8.09401208294 |               |
| NM_001111067 | ACVR1    | 1030 | 1084 | 9.00987310948 |               |
| NM_001111067 | ACVR1    | 196  | 325  | 10.6789748196 |               |
| NM_001097620 | TMEM184A |      | 4754 | 4843          | 11.2079645269 |
| NM_001097620 | TMEM184A |      | 1069 | 1160          | 11.2079645269 |
| NM_001097620 | TMEM184A |      | 310  | 346           | 8.61898442602 |
| NM_001097620 | TMEM184A |      | 3572 | 3610          | 8.62300201864 |
| NM_001097620 | TMEM184A |      | 3685 | 3763          | 10.6230020262 |
| NM_001097620 | TMEM184A |      | 1519 | 1568          | 8.62300202597 |
| NM_001097620 | TMEM184A |      | 2394 | 2446          | 8.53886281681 |
| NM_001097620 | TMEM184A |      | 1855 | 1922          | 10.6230020262 |
| NM_001097620 | TMEM184A |      | 4612 | 4691          | 10.207964291  |
| NM_001097620 | TMEM184A |      | 3953 | 4017          | 10.2079645267 |
| NM_001097620 | TMEM184A |      | 3442 | 3496          | 10.6230020262 |
| NM_001097620 | TMEM184A |      | 3626 | 3681          | 9.62282827587 |
| NM_001097620 | TMEM184A |      | 3222 | 3274          | 9.62299529514 |
| NM_001097620 | TMEM184A |      | 4468 | 4612          | 11.2079645269 |
| NM_001097620 | TMEM184A |      | 465  | 574           | 11.4303569482 |
| NM_001097620 | TMEM184A |      | 2184 | 2310          | 10.9449301211 |
| NM_001097620 | TMEM184A |      | 3809 | 3861          | 8.53886281681 |
| NM_001097620 | TMEM184A |      | 5144 | 5212          | 9.61898442602 |
| NM_001097620 | TMEM184A |      | 579  | 741           | 12.5298926218 |
| NM_001097620 | TMEM184A |      | 939  | 1067          | 11.2079645269 |
| NM_001097620 | TMEM184A |      | 830  | 919           | 10.2079645269 |
| NM_001097620 | TMEM184A |      | 2649 | 2734          | 8.62300202619 |
| NM_001097620 | TMEM184A |      | 5015 | 5106          | 9.61898442602 |
| NM_001097620 | TMEM184A |      | 1165 | 1279          | 10.2079645269 |
| NM_001097620 | TMEM184A |      | 3288 | 3360          | 9.62300179027 |
| NM_014830    | ZBTB39   | 5039 | 5140 | 8.87724604686 |               |

|              |          |      |      |               |               |
|--------------|----------|------|------|---------------|---------------|
| NM_020857    | VPS18    | 1411 | 1476 | 8.83148232648 |               |
| NM_020857    | VPS18    | 2897 | 2952 | 8.83131530721 |               |
| NM_020857    | VPS18    | 1960 | 2009 | 8.82747145736 |               |
| NM_020857    | VPS18    | 2269 | 2381 | 10.8314890575 |               |
| NM_020857    | VPS18    | 514  | 560  | 8.74734984815 |               |
| NM_020857    | VPS18    | 3614 | 3660 | 9.83148882161 |               |
| NM_020857    | VPS18    | 351  | 403  | 8.74734984815 |               |
| NM_020857    | VPS18    | 2506 | 2618 | 10.4164515583 |               |
| NM_020857    | VPS18    | 3551 | 3606 | 9.83131530721 |               |
| NM_020854    | KIAA1468 |      | 247  | 323           | 8.87899371033 |
| NM_020854    | KIAA1468 |      | 567  | 616           | 7.87899371033 |
| NM_020854    | KIAA1468 |      | 4023 | 4121          | 7.87899371033 |
| NM_020853    | KIAA1467 |      | 805  | 872           | 10.1605259459 |
| NM_020853    | KIAA1467 |      | 1253 | 1322          | 9.15650834571 |
| NM_020853    | KIAA1467 |      | 3222 | 3315          | 10.1605259459 |
| NM_020850    | RANBP10  | 2916 | 2992 | 7.27918743421 |               |
| NM_019030    | DHX29    | 3486 | 3555 | 7.53911297417 |               |
| NM_019032    | ADAMTSL4 |      | 3954 | 4012          | 10.4658183377 |
| NM_019032    | ADAMTSL4 |      | 1693 | 1726          | 9.46581833772 |
| NM_019032    | ADAMTSL4 |      | 2035 | 2107          | 11.4698292068 |
| NM_019032    | ADAMTSL4 |      | 308  | 352           | 10.9706592292 |
| NM_014346    | TBC1D22A |      | 1324 | 1374          | 6.66767929904 |
| NM_019034    | RHOF     | 1012 | 1064 | 6.54084345925 |               |
| NM_019034    | RHOF     | 809  | 888  | 7.12581269102 |               |
| NM_019034    | RHOF     | 1390 | 1475 | 6.54085019008 |               |
| NM_022568    | ALDH8A1  | 2048 | 2096 | 11.2933880875 |               |
| NM_022568    | ALDH8A1  | 2284 | 2332 | 12.2092488781 |               |
| NM_016655    | GABPB1   | 720  | 808  | 6.35906733952 |               |
| NM_001143970 | CDYL     | 1175 | 1281 | 7.43775978843 |               |
| NM_001143970 | CDYL     | 255  | 329  | 7.01870468898 |               |
| NM_022566    | MESDC1   | 2851 | 2930 | 12.1880582384 |               |
| NM_001114132 | NBEAL1   | 3645 | 3690 | 8.76849783472 |               |
| NM_001114132 | NBEAL1   | 2374 | 2423 | 8.84861944393 |               |
| NM_001114132 | NBEAL1   | 8404 | 8526 | 9.85263680819 |               |
| NM_016653    | ZAK      | 393  | 470  | 7.98675496087 |               |
| NM_194463    | RNF128   | 741  | 804  | 4.67272073302 |               |
| NM_194463    | RNF128   | 285  | 348  | 3.67272072548 |               |
| NM_194463    | RNF128   | 2596 | 2657 | 3.67272049711 |               |
| NM_194463    | RNF128   | 1689 | 1741 | 4.25366563357 |               |
| NM_194463    | RNF128   | 1614 | 1683 | 3.67272073302 |               |
| NM_194463    | RNF128   | 2456 | 2502 | 2.67272049711 |               |
| NM_194463    | RNF128   | 2075 | 2132 | 3.6727207328  |               |
| NM_194463    | RNF128   | 1011 | 1105 | 5.99464882791 |               |
| NM_194463    | RNF128   | 1303 | 1581 | 6.13215235166 |               |
| NM_194463    | RNF128   | 813  | 996  | 7.13215235166 |               |
| NM_194463    | RNF128   | 1138 | 1282 | 6.37316045117 |               |
| NM_194463    | RNF128   | 47   | 147  | 5.25768323375 |               |
| NM_194463    | RNF128   | 615  | 698  | 3.67272073302 |               |
| NM_194463    | RNF128   | 366  | 413  | 2.58858152364 |               |
| NM_194460    | RNF126   | 1233 | 1313 | 5.75025616231 |               |

|              |          |      |      |               |               |
|--------------|----------|------|------|---------------|---------------|
| NM_194460    | RNF126   | 112  | 254  | 8.75025616253 |               |
| NM_194460    | RNF126   | 1322 | 1394 | 8.92018116398 |               |
| NM_194460    | RNF126   | 1528 | 1583 | 5.75024943148 |               |
| NM_194460    | RNF126   | 763  | 806  | 5.66611695315 |               |
| NM_001198800 | ASCC1    | 1005 | 1062 | 6.38650302514 |               |
| NM_001198800 | ASCC1    | 1795 | 1885 | 6.97163927618 |               |
| NM_001198800 | ASCC1    | 314  | 417  | 6.97163927618 |               |
| NM_001198802 | EIF4G3   | 2138 | 2223 | 5.65743985394 |               |
| NM_001198802 | EIF4G3   | 2979 | 3062 | 5.65342226131 |               |
| NM_001198802 | EIF4G3   | 4573 | 4629 | 6.5733006521  |               |
| NM_001198802 | EIF4G3   | 3324 | 3394 | 5.65743986126 |               |
| NM_001478    | B4GALNT1 |      | 1182 | 1230          | 11.5754279882 |
| NM_001478    | B4GALNT1 |      | 778  | 824           | 10.5714171191 |
| NM_001478    | B4GALNT1 |      | 1538 | 1594          | 12.160390489  |
| NM_001478    | B4GALNT1 |      | 598  | 649           | 10.5754347193 |
| NM_001478    | B4GALNT1 |      | 667  | 712           | 12.16039722   |
| NM_001478    | B4GALNT1 |      | 1075 | 1137          | 12.1603972198 |
| NM_001478    | B4GALNT1 |      | 2449 | 2525          | 10.5754279882 |
| NM_001478    | B4GALNT1 |      | 1850 | 1933          | 12.16039722   |
| NM_001478    | B4GALNT1 |      | 2566 | 2612          | 11.5754344834 |
| NM_001478    | B4GALNT1 |      | 462  | 531           | 12.16039722   |
| NM_001478    | B4GALNT1 |      | 2073 | 2222          | 12.8973628142 |
| NM_001478    | B4GALNT1 |      | 987  | 1071          | 12.5754347193 |
| NM_001478    | B4GALNT1 |      | 175  | 217           | 10.5714171191 |
| NM_004111    | FEN1     | 463  | 506  | 8.03878054313 |               |
| NM_004111    | FEN1     | 2147 | 2259 | 7.62374304385 |               |
| NM_004111    | FEN1     | 685  | 751  | 6.95464133374 |               |
| NM_004111    | FEN1     | 2037 | 2146 | 9.94567113873 |               |
| NM_004111    | FEN1     | 762  | 819  | 6.03860679281 |               |
| NM_004111    | FEN1     | 826  | 867  | 8.0387805429  |               |
| NM_004111    | FEN1     | 627  | 684  | 7.03878053558 |               |
| NM_004111    | FEN1     | 1238 | 1415 | 10.0387805431 |               |
| NM_004111    | FEN1     | 1874 | 1987 | 8.84613546518 |               |
| NM_004111    | FEN1     | 1438 | 1538 | 7.62374304385 |               |
| NM_004111    | FEN1     | 534  | 623  | 7.62374304385 |               |
| NM_004111    | FEN1     | 319  | 449  | 8.36070863801 |               |
| NM_004111    | FEN1     | 1569 | 1810 | 10.1262433844 |               |
| NM_004111    | FEN1     | 923  | 1222 | 10.7392202613 |               |
| NM_202758    | ENOSF1   | 2956 | 3011 | 5.6164424552  |               |
| NM_202758    | ENOSF1   | 1073 | 1141 | 5.69656406442 |               |
| NM_030662    | MAP2K2   | 568  | 642  | 5.58698947144 |               |
| NM_030662    | MAP2K2   | 1457 | 1518 | 3.58297187126 |               |
| NM_030662    | MAP2K2   | 1355 | 1430 | 5.58698947144 |               |
| NM_030662    | MAP2K2   | 1646 | 1702 | 5.17195197216 |               |
| NM_030662    | MAP2K2   | 1006 | 1062 | 3.58698946389 |               |
| NM_030662    | MAP2K2   | 1176 | 1350 | 7.28742918958 |               |
| NM_030662    | MAP2K2   | 779  | 907  | 7.17195197216 |               |
| NM_030662    | MAP2K2   | 665  | 736  | 5.17195197216 |               |
| NM_030662    | MAP2K2   | 328  | 507  | 6.75691447288 |               |
| NM_030662    | MAP2K2   | 909  | 1006 | 5.90891756632 |               |

|              |           |      |      |               |               |
|--------------|-----------|------|------|---------------|---------------|
| NM_030665    | RAI1      | 6347 | 6377 | 8.18151539255 |               |
| NM_030665    | RAI1      | 2118 | 2190 | 9.18152212361 |               |
| NM_030665    | RAI1      | 5499 | 5561 | 8.09738291422 |               |
| NM_030665    | RAI1      | 1530 | 1589 | 10.1815221236 |               |
| NM_030665    | RAI1      | 5138 | 5198 | 9.18151539255 |               |
| NM_030665    | RAI1      | 7290 | 7437 | 9.76648462433 |               |
| NM_030665    | RAI1      | 4521 | 4595 | 9.18151539255 |               |
| NM_030666    | SERPINB1  |      | 861  | 925           | 5.46190613026 |
| NM_030666    | SERPINB1  |      | 740  | 777           | 4.87292602937 |
| NM_030666    | SERPINB1  |      | 398  | 442           | 4.87676987923 |
| NM_030666    | SERPINB1  |      | 452  | 529           | 6.6842985516  |
| NM_030666    | SERPINB1  |      | 794  | 858           | 3.87694362954 |
| NM_030666    | SERPINB1  |      | 1323 | 1408          | 6.46190613026 |
| NM_030666    | SERPINB1  |      | 925  | 1060          | 7.04686863099 |
| NM_030666    | SERPINB1  |      | 1212 | 1284          | 5.46190613026 |
| NM_030666    | SERPINB1  |      | 1090 | 1180          | 5.46190613026 |
| NM_030666    | SERPINB1  |      | 563  | 711           | 7.19887172443 |
| NM_030666    | SERPINB1  |      | 271  | 360           | 6.87694362954 |
| NM_020998    | MST1      | 1824 | 1866 | 3.53853457286 |               |
| NM_001142593 | ITPK1     | 2697 | 2738 | 7.05542720329 |               |
| NM_001142593 | ITPK1     | 1479 | 1536 | 8.05927105315 |               |
| NM_001142593 | ITPK1     | 2930 | 3032 | 7.05542720329 |               |
| NM_003831    | RIOK3     | 961  | 1041 | 6.63733380557 |               |
| NM_003831    | RIOK3     | 3839 | 3887 | 5.05236458134 |               |
| NM_003831    | RIOK3     | 743  | 829  | 5.05237107648 |               |
| NM_003831    | RIOK3     | 2689 | 2747 | 5.04835371222 |               |
| NM_003831    | RIOK3     | 849  | 917  | 6.6373335772  |               |
| NM_003831    | RIOK3     | 573  | 670  | 7.85972623445 |               |
| NM_003831    | RIOK3     | 1303 | 1366 | 4.96823210301 |               |
| NM_003831    | RIOK3     | 1847 | 1946 | 6.63732708206 |               |
| NM_003839    | TNFRSF11A |      | 246  | 281           | 10.782309633  |
| NM_003839    | TNFRSF11A |      | 708  | 780           | 11.8664488422 |
| NM_001690    | ATP6V1A   | 158  | 212  | 8.22832883968 |               |
| NM_001690    | ATP6V1A   | 2279 | 2344 | 8.96529419793 |               |
| NM_001690    | ATP6V1A   | 3932 | 3989 | 8.96529443385 |               |
| NM_001690    | ATP6V1A   | 3463 | 3522 | 8.22832883968 |               |
| NM_001690    | ATP6V1A   | 2897 | 2934 | 8.64336610304 |               |
| NM_001690    | ATP6V1A   | 240  | 396  | 11.2872225287 |               |
| NM_001690    | ATP6V1A   | 4187 | 4231 | 7.64336633896 |               |
| NM_001690    | ATP6V1A   | 4005 | 4060 | 7.64336633874 |               |
| NM_001690    | ATP6V1A   | 4250 | 4328 | 7.64336633896 |               |
| NM_001690    | ATP6V1A   | 3892 | 3932 | 6.64319258864 |               |
| NM_001690    | ATP6V1A   | 2344 | 2424 | 8.64336633896 |               |
| NM_001690    | ATP6V1A   | 4334 | 4399 | 9.45072126102 |               |
| NM_001690    | ATP6V1A   | 3785 | 3838 | 8.22832883968 |               |
| NM_001690    | ATP6V1A   | 2590 | 2642 | 6.64336633141 |               |
| NM_001690    | ATP6V1A   | 4404 | 4478 | 7.64336633896 |               |
| NM_001690    | ATP6V1A   | 4134 | 4185 | 7.55922712958 |               |
| NM_001690    | ATP6V1A   | 55   | 106  | 6.64335960791 |               |
| NM_001690    | ATP6V1A   | 3578 | 3654 | 7.64336610304 |               |

|              |          |      |      |               |               |
|--------------|----------|------|------|---------------|---------------|
| NM_001690    | ATP6V1A  | 1857 | 1981 | 9.22832883968 |               |
| NM_001690    | ATP6V1A  | 599  | 807  | 11.0356837617 |               |
| NM_001690    | ATP6V1A  | 412  | 593  | 10.450721261  |               |
| NM_001690    | ATP6V1A  | 1985 | 2121 | 10.5502569346 |               |
| NM_001690    | ATP6V1A  | 814  | 988  | 10.3438060571 |               |
| NM_001690    | ATP6V1A  | 1693 | 1828 | 9.22832883968 |               |
| NM_001690    | ATP6V1A  | 2658 | 2731 | 6.63934873879 |               |
| NM_001690    | ATP6V1A  | 3352 | 3432 | 7.64336610304 |               |
| NM_001690    | ATP6V1A  | 1280 | 1656 | 11.8912938524 |               |
| NM_001690    | ATP6V1A  | 2743 | 2813 | 7.64336633896 |               |
| NM_001690    | ATP6V1A  | 990  | 1273 | 11.643366339  |               |
| NM_001693    | ATP6V1B2 |      | 1204 | 1267          | 6.4085006632  |
| NM_001693    | ATP6V1B2 |      | 2199 | 2285          | 5.40850066321 |
| NM_001693    | ATP6V1B2 |      | 2916 | 2963          | 6.99328941361 |
| NM_001693    | ATP6V1B2 |      | 773  | 804           | 6.99328941361 |
| NM_001693    | ATP6V1B2 |      | 1038 | 1091          | 5.40849393215 |
| NM_001693    | ATP6V1B2 |      | 809  | 882           | 5.40448306303 |
| NM_001693    | ATP6V1B2 |      | 894  | 1014          | 7.73042875809 |
| NM_001693    | ATP6V1B2 |      | 691  | 735           | 5.32436145382 |
| NM_001693    | ATP6V1B2 |      | 1720 | 1805          | 6.99346316393 |
| NM_001693    | ATP6V1B2 |      | 2754 | 2875          | 7.73042875809 |
| NM_001693    | ATP6V1B2 |      | 573  | 619           | 6.40832691289 |
| NM_001695    | ATP6V1C1 |      | 772  | 863           | 6.994046027   |
| NM_001695    | ATP6V1C1 |      | 367  | 463           | 7.57900852772 |
| NM_001695    | ATP6V1C1 |      | 4205 | 4239          | 4.99002842682 |
| NM_001695    | ATP6V1C1 |      | 1203 | 1280          | 6.994046027   |
| NM_001695    | ATP6V1C1 |      | 1340 | 1411          | 6.5790082918  |
| NM_001695    | ATP6V1C1 |      | 2313 | 2390          | 5.99387227668 |
| NM_001695    | ATP6V1C1 |      | 1505 | 1560          | 5.994046027   |
| NM_001695    | ATP6V1C1 |      | 1994 | 2099          | 6.57900852749 |
| NM_001695    | ATP6V1C1 |      | 484  | 576           | 7.994046027   |
| NM_001695    | ATP6V1C1 |      | 1566 | 1621          | 7.31597411433 |
| NM_001695    | ATP6V1C1 |      | 3175 | 3224          | 4.99002842682 |
| NM_001695    | ATP6V1C1 |      | 972  | 1017          | 5.90990681761 |
| NM_001695    | ATP6V1C1 |      | 1441 | 1502          | 6.99404579108 |
| NM_001695    | ATP6V1C1 |      | 163  | 288           | 7.57900852772 |
| NM_001695    | ATP6V1C1 |      | 636  | 716           | 6.57900852772 |
| NM_001695    | ATP6V1C1 |      | 1799 | 1872          | 7.31597388596 |
| NM_001128127 | GK       | 2630 | 2710 | 4.95766056237 |               |
| NM_001128127 | GK       | 69   | 112  | 4.95364296242 |               |
| NM_001128127 | GK       | 294  | 353  | 3.95364296242 |               |
| NM_001128127 | GK       | 1287 | 1337 | 4.95765383154 |               |
| NM_001128127 | GK       | 3348 | 3432 | 5.95766056259 |               |
| NM_001128127 | GK       | 1868 | 1906 | 3.87352135321 |               |
| NM_001128127 | GK       | 863  | 908  | 3.95766056259 |               |
| NM_001128127 | GK       | 2474 | 2523 | 4.87352135321 |               |
| NM_001128127 | GK       | 1120 | 1161 | 5.53860546314 |               |
| NM_001128127 | GK       | 1794 | 1856 | 3.95766032667 |               |
| NM_001128127 | GK       | 753  | 855  | 5.95766056259 |               |
| NM_001128127 | GK       | 1161 | 1238 | 4.95766055504 |               |

|              |          |      |      |               |               |
|--------------|----------|------|------|---------------|---------------|
| NM_001128127 | GK       | 934  | 1029 | 5.54262306331 |               |
| NM_001128127 | GK       | 507  | 594  | 5.95766055504 |               |
| NM_001128127 | GK       | 1579 | 1720 | 6.27958865748 |               |
| NM_001128127 | GK       | 1912 | 1988 | 5.54262306331 |               |
| NM_001128127 | GK       | 2162 | 2250 | 4.95766056237 |               |
| NM_020704    | FAM40B   | 3781 | 3832 | 9.48373037955 |               |
| NM_020705    | TBC1D24  | 3680 | 3723 | 9.95941177464 |               |
| NM_020705    | TBC1D24  | 3883 | 3943 | 10.6283397344 |               |
| NM_020705    | TBC1D24  | 133  | 266  | 10.043550984  |               |
| NM_020705    | TBC1D24  | 3371 | 3413 | 9.03953338385 |               |
| NM_020705    | TBC1D24  | 1372 | 1433 | 10.0395333838 |               |
| NM_020702    | KIAA1161 |      | 3323 | 3397          | 10.4942659767 |
| NM_020702    | KIAA1161 |      | 1345 | 1395          | 8.41012676733 |
| NM_020702    | KIAA1161 |      | 63   | 148           | 10.8161940716 |
| NM_020702    | KIAA1161 |      | 1911 | 1952          | 10.4942592457 |
| NM_020702    | KIAA1161 |      | 4466 | 4517          | 8.49425924566 |
| NM_020702    | KIAA1161 |      | 2096 | 2146          | 9.49024837654 |
| NM_020702    | KIAA1161 |      | 2512 | 2572          | 8.49024837654 |
| NM_020702    | KIAA1161 |      | 5925 | 6005          | 10.0792217464 |
| NM_020702    | KIAA1161 |      | 1227 | 1267          | 9.41012676733 |
| NM_020702    | KIAA1161 |      | 4155 | 4189          | 8.41012676733 |
| NM_020702    | KIAA1161 |      | 5073 | 5115          | 8.49409222639 |
| NM_020702    | KIAA1161 |      | 4294 | 4342          | 8.49024837654 |
| NM_020702    | KIAA1161 |      | 5446 | 5535          | 10.8161940716 |
| NM_020702    | KIAA1161 |      | 580  | 622           | 8.49425924566 |
| NM_020702    | KIAA1161 |      | 1701 | 1802          | 9.49426597671 |
| NM_020702    | KIAA1161 |      | 6249 | 6319          | 8.49426574079 |
| NM_020702    | KIAA1161 |      | 2177 | 2313          | 11.0792284774 |
| NM_020702    | KIAA1161 |      | 4544 | 4670          | 8.49426597671 |
| NM_020702    | KIAA1161 |      | 3888 | 3991          | 10.4942659767 |
| NM_020700    | PPM1H    | 4518 | 4607 | 7.22817311676 |               |
| NM_020700    | PPM1H    | 2556 | 2615 | 6.55907140666 |               |
| NM_199229    | RPE      | 128  | 227  | 8.64002384504 |               |
| NM_000120    | EPHX1    | 1668 | 1716 | 6.25061311513 |               |
| NM_000120    | EPHX1    | 379  | 448  | 7.25061310758 |               |
| NM_000120    | EPHX1    | 463  | 629  | 9.71004473377 |               |
| NM_000120    | EPHX1    | 823  | 1127 | 10.2506131151 |               |
| NM_000120    | EPHX1    | 1153 | 1494 | 11.7100447338 |               |
| NM_000120    | EPHX1    | 247  | 347  | 7.25061311513 |               |
| NM_000120    | EPHX1    | 670  | 797  | 9.57254121002 |               |
| NM_000120    | EPHX1    | 1538 | 1660 | 8.83557561585 |               |
| NM_000121    | EPOR     | 547  | 591  | 11.2126921562 |               |
| NM_000121    | EPOR     | 884  | 923  | 10.132570547  |               |
| NM_000122    | ERCC3    | 1092 | 1147 | 7.6831087413  |               |
| NM_000122    | ERCC3    | 68   | 99   | 7.18393226856 |               |
| NM_000122    | ERCC3    | 2356 | 2430 | 5.67909137705 |               |
| NM_000122    | ERCC3    | 1919 | 1997 | 7.68310224617 |               |
| NM_000122    | ERCC3    | 480  | 570  | 6.59896976784 |               |
| NM_000122    | ERCC3    | 889  | 938  | 7.18393226856 |               |
| NM_000122    | ERCC3    | 977  | 1087 | 7.68310897722 |               |

|              |          |      |      |               |               |
|--------------|----------|------|------|---------------|---------------|
| NM_000122    | ERCC3    | 1490 | 1625 | 7.26807147794 |               |
| NM_000122    | ERCC3    | 1795 | 1865 | 7.26806474689 |               |
| NM_024026    | MRP63    | 745  | 775  | 6.15391770312 |               |
| NM_024026    | MRP63    | 831  | 902  | 5.07379609391 |               |
| NM_024026    | MRP63    | 474  | 515  | 5.15391770312 |               |
| NM_024026    | MRP63    | 587  | 660  | 6.15391770312 |               |
| NM_144653    | NACC2    | 2997 | 3056 | 10.4209696687 |               |
| NM_144653    | NACC2    | 4272 | 4340 | 12.0099497694 |               |
| NM_144653    | NACC2    | 2757 | 2845 | 11.4249872689 |               |
| NM_144653    | NACC2    | 5904 | 5976 | 11.4249872689 |               |
| NM_144653    | NACC2    | 1993 | 2052 | 12.4249872614 |               |
| NM_144653    | NACC2    | 1670 | 1720 | 10.4209696687 |               |
| NM_144653    | NACC2    | 1903 | 1969 | 10.4249805379 |               |
| NM_144653    | NACC2    | 1223 | 1261 | 10.3408480595 |               |
| NM_144653    | NACC2    | 6110 | 6180 | 12.4249805379 |               |
| NM_144653    | NACC2    | 4608 | 4690 | 12.7469153638 |               |
| NM_144653    | NACC2    | 3331 | 3403 | 11.4209696687 |               |
| NM_144653    | NACC2    | 3469 | 3555 | 11.4249872689 |               |
| NM_144653    | NACC2    | 6335 | 6523 | 12.4249872689 |               |
| NM_144653    | NACC2    | 1384 | 1515 | 11.4249872689 |               |
| NM_144653    | NACC2    | 5227 | 5370 | 13.0099497696 |               |
| NM_144653    | NACC2    | 6206 | 6289 | 11.4249872687 |               |
| NM_000127    | EXT1     | 1977 | 2098 | 9.07338065194 |               |
| NM_000127    | EXT1     | 2723 | 2777 | 8.48841142771 |               |
| NM_000127    | EXT1     | 2599 | 2652 | 8.4844005586  |               |
| NM_000127    | EXT1     | 909  | 942  | 7.40427894938 |               |
| NM_000127    | EXT1     | 288  | 352  | 9.07338065949 |               |
| NM_000127    | EXT1     | 2976 | 3024 | 7.40427894938 |               |
| NM_000127    | EXT1     | 438  | 521  | 8.4844005586  |               |
| NM_000127    | EXT1     | 1380 | 1471 | 7.48841792285 |               |
| NM_024029    | YIPF2    | 947  | 1010 | 9.76999341011 |               |
| NM_024029    | YIPF2    | 1105 | 1195 | 10.1850309094 |               |
| NM_024029    | YIPF2    | 1011 | 1068 | 7.18503090939 |               |
| NM_024029    | YIPF2    | 245  | 298  | 7.18101330921 |               |
| NM_024029    | YIPF2    | 326  | 513  | 10.3549559108 |               |
| NM_024029    | YIPF2    | 689  | 840  | 10.8854706275 |               |
| NM_024789    | TMEM180  | 1152 | 1207 | 11.8099501112 |               |
| NM_001142622 | GHDC     | 728  | 775  | 9.14597444171 |               |
| NM_001142622 | GHDC     | 1387 | 1433 | 8.55699457673 |               |
| NM_001142622 | GHDC     | 937  | 1017 | 7.56100544585 |               |
| NM_021035    | ZNFX1    | 4371 | 4413 | 7.96922743519 |               |
| NM_021035    | ZNFX1    | 1331 | 1412 | 7.96940094959 |               |
| NM_021035    | ZNFX1    | 1223 | 1253 | 7.88526197612 |               |
| NM_001142621 | TGFBRAP1 |      | 3941 | 4035          | 5.40696918104 |
| NM_001142621 | TGFBRAP1 |      | 2829 | 2864          | 6.40679566664 |
| NM_001142621 | TGFBRAP1 |      | 1668 | 1766          | 6.40696940941 |
| NM_001142621 | TGFBRAP1 |      | 4373 | 4440          | 6.32283020758 |
| NM_001142621 | TGFBRAP1 |      | 3523 | 3556          | 5.40295181679 |
| NM_001142621 | TGFBRAP1 |      | 123  | 179           | 5.32283020758 |
| NM_001142621 | TGFBRAP1 |      | 3215 | 3283          | 6.40696941696 |



|              |          |       |       |                 |               |
|--------------|----------|-------|-------|-----------------|---------------|
| NM_001142621 | TGFBRAP1 |       | 4747  | 4835            | 6.99193191768 |
| NM_001142621 | TGFBRAP1 |       | 602   | 662             | 6.40696268591 |
| NM_021033    | RAP2A    | 3541  | 3612  | 7.62137438576   |               |
| NM_021033    | RAP2A    | 3878  | 3945  | 7.62154813607   |               |
| NM_021033    | RAP2A    | 2035  | 2095  | 7.03641188504   |               |
| NM_021033    | RAP2A    | 436   | 463   | 7.03256803518   |               |
| NM_021033    | RAP2A    | 2199  | 2292  | 7.03658539944   |               |
| NM_021033    | RAP2A    | 482   | 559   | 7.0365789043    |               |
| NM_021033    | RAP2A    | 3703  | 3813  | 7.62154790016   |               |
| NM_000380    | XPA      | 608   | 628   | 5.25426098377   |               |
| NM_201568    | SMG7     | 1338  | 1380  | 6.0459432648    |               |
| NM_201568    | SMG7     | 827   | 885   | 5.96582165559   |               |
| NM_201568    | SMG7     | 2578  | 2637  | 6.04996085743   |               |
| NM_201568    | SMG7     | 5047  | 5097  | 7.04995413392   |               |
| NM_201568    | SMG7     | 3208  | 3282  | 7.04996086497   |               |
| NM_201568    | SMG7     | 5226  | 5308  | 6.04996085743   |               |
| NM_201568    | SMG7     | 2733  | 2764  | 5.96582165559   |               |
| NM_201568    | SMG7     | 3426  | 3462  | 6.96582165559   |               |
| NM_201568    | SMG7     | 492   | 565   | 7.63090576552   |               |
| NM_201568    | SMG7     | 1012  | 1066  | 6.04996086497   |               |
| NM_201568    | SMG7     | 1497  | 1551  | 7.0459432648    |               |
| NM_201568    | SMG7     | 281   | 354   | 6.04995413392   |               |
| NM_201568    | SMG7     | 376   | 487   | 8.04996086497   |               |
| NM_201568    | SMG7     | 3119  | 3185  | 6.04995413392   |               |
| NM_201568    | SMG7     | 1392  | 1486  | 7.6349233657    |               |
| NM_201568    | SMG7     | 4395  | 4457  | 6.04978711466   |               |
| NM_201568    | SMG7     | 5339  | 5435  | 8.37188895986   |               |
| NM_201568    | SMG7     | 3340  | 3423  | 7.63492312978   |               |
| NM_201568    | SMG7     | 1069  | 1267  | 9.21988586642   |               |
| NM_000384    | APOB     | 12898 | 12981 | 3.32899732104   |               |
| NM_000384    | APOB     | 9411  | 9667  | 5.23588791665   |               |
| NM_000384    | APOB     | 1212  | 1252  | -0.340104389065 |               |
| NM_000384    | APOB     | 8069  | 8494  | 5.81012401078   |               |
| NM_000384    | APOB     | 12986 | 13134 | 3.91395982176   |               |
| NM_000384    | APOB     | 8503  | 8688  | 4.38789101009   |               |
| NM_000384    | APOB     | 1075  | 1201  | 3.83149766157   |               |
| NM_000384    | APOB     | 8712  | 9410  | 6.60201581545   |               |
| NM_000384    | APOB     | 12371 | 12885 | 6.18697831617   |               |
| NM_000384    | APOB     | 9674  | 9751  | 3.44447453846   |               |
| NM_000384    | APOB     | 13833 | 14117 | 4.78842893968   |               |
| NM_000384    | APOB     | 5622  | 6597  | 7.12773911279   |               |
| NM_000384    | APOB     | 3498  | 4702  | 7.49892232248   |               |
| NM_000384    | APOB     | 11613 | 12364 | 6.81012401078   |               |
| NM_000384    | APOB     | 2943  | 2992  | -0.255971910734 |               |
| NM_000384    | APOB     | 6598  | 6740  | 3.91395982176   |               |
| NM_000384    | APOB     | 9771  | 11610 | 8.13205210566   |               |
| NM_000384    | APOB     | 2994  | 3497  | 6.0478155685    |               |
| NM_000384    | APOB     | 162   | 1064  | 6.31389042865   |               |
| NM_000384    | APOB     | 1255  | 2939  | 8.00612966569   |               |
| NM_000384    | APOB     | 6743  | 8056  | 7.53845068667   |               |

|           |          |       |       |               |               |
|-----------|----------|-------|-------|---------------|---------------|
| NM_000384 | APOB     | 4705  | 5621  | 7.34394766251 |               |
| NM_000384 | APOB     | 13143 | 13817 | 6.47195527488 |               |
| NM_201566 | SLC16A13 |       | 1485  | 1542          | 10.1495117287 |
| NM_201566 | SLC16A13 |       | 235   | 296           | 10.1495117285 |
| NM_201566 | SLC16A13 |       | 1276  | 1355          | 11.7344742294 |
| NM_201566 | SLC16A13 |       | 479   | 529           | 8.56053162781 |
| NM_201566 | SLC16A13 |       | 945   | 1013          | 10.1495117287 |
| NM_201566 | SLC16A13 |       | 820   | 881           | 8.56053162781 |
| NM_201566 | SLC16A13 |       | 370   | 446           | 9.56454922798 |
| NM_201566 | SLC16A13 |       | 600   | 769           | 12.4714398236 |
| NM_201566 | SLC16A13 |       | 1025  | 1237          | 12.0239808466 |
| NM_012161 | FBXL5    | 2190  | 2240  | 8.31214259137 |               |
| NM_012161 | FBXL5    | 1889  | 1947  | 7.31214259137 |               |
| NM_012161 | FBXL5    | 2292  | 2392  | 7.31214282707 |               |
| NM_006260 | DNAJC3   | 3990  | 4064  | 6.32045571029 |               |
| NM_006260 | DNAJC3   | 5278  | 5345  | 6.3204557103  |               |
| NM_006260 | DNAJC3   | 4454  | 4521  | 7.64238380518 |               |
| NM_006260 | DNAJC3   | 79    | 133   | 6.32045547438 |               |
| NM_006260 | DNAJC3   | 1791  | 1856  | 6.90541821102 |               |
| NM_006260 | DNAJC3   | 375   | 402   | 6.23631650091 |               |
| NM_006260 | DNAJC3   | 2683  | 2724  | 6.90541821101 |               |
| NM_006260 | DNAJC3   | 4385  | 4448  | 5.32044897924 |               |
| NM_006260 | DNAJC3   | 402   | 472   | 6.90541820347 |               |
| NM_006260 | DNAJC3   | 3707  | 3746  | 6.32044897924 |               |
| NM_006260 | DNAJC3   | 177   | 375   | 9.56838322374 |               |
| NM_006260 | DNAJC3   | 3256  | 3325  | 6.32045547438 |               |
| NM_006260 | DNAJC3   | 647   | 884   | 9.71277313308 |               |
| NM_006260 | DNAJC3   | 915   | 961   | 6.32045570275 |               |
| NM_006260 | DNAJC3   | 5049  | 5100  | 5.23631650091 |               |
| NM_006260 | DNAJC3   | 2449  | 2526  | 7.3204557103  |               |
| NM_006260 | DNAJC3   | 5177  | 5216  | 5.23631650091 |               |
| NM_006260 | DNAJC3   | 1542  | 1786  | 9.49038071174 |               |
| NM_006260 | DNAJC3   | 3075  | 3235  | 6.90541821102 |               |
| NM_006260 | DNAJC3   | 1865  | 1967  | 8.12781063235 |               |
| NM_006260 | DNAJC3   | 4102  | 4150  | 5.32045570275 |               |
| NM_006260 | DNAJC3   | 3370  | 3512  | 7.90541821102 |               |
| NM_006260 | DNAJC3   | 4617  | 4678  | 5.32028195998 |               |
| NM_006260 | DNAJC3   | 1008  | 1322  | 9.96431190007 |               |
| NM_006260 | DNAJC3   | 1354  | 1528  | 8.3204557103  |               |
| NM_006260 | DNAJC3   | 3811  | 3876  | 6.32045570275 |               |
| NM_006260 | DNAJC3   | 1993  | 2267  | 9.02089542844 |               |
| NM_006263 | PSME1    | 515   | 574   | 2.41539826692 |               |
| NM_006263 | PSME1    | 607   | 697   | 3.63779741931 |               |
| NM_006263 | PSME1    | 769   | 821   | 1.8304357662  |               |
| NM_006263 | PSME1    | 422   | 487   | 2.41540499775 |               |
| NM_003342 | UBE2G1   | 1435  | 1500  | 7.70426710527 |               |
| NM_003342 | UBE2G1   | 2415  | 2490  | 6.70828470544 |               |
| NM_003342 | UBE2G1   | 3929  | 3997  | 8.70828470544 |               |
| NM_003342 | UBE2G1   | 1595  | 1648  | 8.29324719862 |               |
| NM_003342 | UBE2G1   | 136   | 213   | 7.70426710527 |               |

|           |        |      |      |               |
|-----------|--------|------|------|---------------|
| NM_003342 | UBE2G1 | 1176 | 1256 | 8.28922960599 |
| NM_003342 | UBE2G1 | 4033 | 4085 | 6.70811095513 |
| NM_003342 | UBE2G1 | 546  | 652  | 6.70828446953 |
| NM_003342 | UBE2G1 | 913  | 1021 | 9.29324720617 |
| NM_003342 | UBE2G1 | 1076 | 1168 | 8.29324720617 |
| NM_003342 | UBE2G1 | 1842 | 1893 | 7.70827797439 |
| NM_003342 | UBE2G1 | 1700 | 1788 | 7.7082846979  |
| NM_003342 | UBE2G1 | 316  | 475  | 7.70828470545 |
| NM_006265 | RAD21  | 3563 | 3639 | 3.66703191716 |
| NM_006265 | RAD21  | 2883 | 2924 | 2.08206268538 |
| NM_006265 | RAD21  | 592  | 666  | 3.08206941644 |
| NM_006265 | RAD21  | 1317 | 1358 | 4.40399751132 |
| NM_006265 | RAD21  | 2254 | 2304 | 1.99793020705 |
| NM_006265 | RAD21  | 2820 | 2871 | 3.6670251861  |
| NM_006265 | RAD21  | 2334 | 2421 | 3.08206941621 |
| NM_006265 | RAD21  | 2121 | 2194 | 2.08206941643 |
| NM_006265 | RAD21  | 951  | 1019 | 4.08206941643 |
| NM_006265 | RAD21  | 434  | 529  | 4.40399751132 |
| NM_006265 | RAD21  | 758  | 897  | 5.08206941644 |
| NM_006265 | RAD21  | 1394 | 1546 | 5.25199441788 |
| NM_006265 | RAD21  | 1072 | 1178 | 4.40399751132 |
| NM_006265 | RAD21  | 3098 | 3191 | 4.40399751132 |
| NM_006265 | RAD21  | 3641 | 3729 | 3.66685816684 |
| NM_003344 | UBE2H  | 1226 | 1293 | 5.01404407201 |
| NM_003344 | UBE2H  | 2950 | 2998 | 4.01404407201 |
| NM_003344 | UBE2H  | 405  | 463  | 4.51504111366 |
| NM_003344 | UBE2H  | 2560 | 2624 | 4.01421109127 |
| NM_003344 | UBE2H  | 1837 | 1898 | 2.93007861294 |
| NM_003344 | UBE2H  | 472  | 717  | 6.18414282377 |
| NM_006267 | RANBP2 | 1704 | 1801 | 6.89962978306 |
| NM_006267 | RANBP2 | 8940 | 8982 | 5.57770145225 |
| NM_006267 | RANBP2 | 897  | 953  | 7.16266418889 |
| NM_006267 | RANBP2 | 3427 | 3460 | 6.15864658872 |
| NM_006267 | RANBP2 | 2512 | 2558 | 4.49356247879 |
| NM_006267 | RANBP2 | 9251 | 9311 | 5.57769495712 |
| NM_006267 | RANBP2 | 5671 | 5735 | 6.89962978306 |
| NM_006267 | RANBP2 | 9658 | 9697 | 4.49356247879 |
| NM_006267 | RANBP2 | 3460 | 3520 | 4.57770168817 |
| NM_006267 | RANBP2 | 8327 | 8398 | 7.38505661023 |
| NM_006267 | RANBP2 | 9369 | 9432 | 6.57770168817 |
| NM_006267 | RANBP2 | 6094 | 6180 | 6.16266418889 |
| NM_006267 | RANBP2 | 1336 | 1414 | 6.57770168817 |
| NM_006267 | RANBP2 | 8804 | 8846 | 5.57752793786 |
| NM_006267 | RANBP2 | 5442 | 5514 | 6.89962978306 |
| NM_006267 | RANBP2 | 9810 | 9861 | 4.573684088   |
| NM_006267 | RANBP2 | 5564 | 5649 | 6.16266395298 |
| NM_006267 | RANBP2 | 953  | 1020 | 6.07852497951 |
| NM_006267 | RANBP2 | 5983 | 6052 | 5.57752793786 |
| NM_006267 | RANBP2 | 9701 | 9791 | 4.57769495712 |
| NM_006267 | RANBP2 | 4267 | 4426 | 7.38505661023 |

|              |        |      |      |               |
|--------------|--------|------|------|---------------|
| NM_006267    | RANBP2 | 1038 | 1106 | 6.15864658872 |
| NM_006267    | RANBP2 | 9109 | 9185 | 6.16266395298 |
| NM_006267    | RANBP2 | 6584 | 6663 | 4.57770168817 |
| NM_006267    | RANBP2 | 4533 | 4621 | 5.57770168817 |
| NM_006267    | RANBP2 | 4688 | 4799 | 7.16266418889 |
| NM_006267    | RANBP2 | 1112 | 1257 | 7.16266418889 |
| NM_006267    | RANBP2 | 2093 | 2173 | 6.89962978306 |
| NM_006267    | RANBP2 | 3551 | 3666 | 6.89962978306 |
| NM_006267    | RANBP2 | 8450 | 8618 | 7.89962978306 |
| NM_006267    | RANBP2 | 9313 | 9368 | 5.573684088   |
| NM_006267    | RANBP2 | 3669 | 3802 | 5.57770168817 |
| NM_006267    | RANBP2 | 8113 | 8222 | 5.57770168817 |
| NM_006267    | RANBP2 | 4834 | 4945 | 6.16266418889 |
| NM_006267    | RANBP2 | 547  | 668  | 4.57770168817 |
| NM_006267    | RANBP2 | 6351 | 6476 | 7.16266418889 |
| NM_006267    | RANBP2 | 5818 | 5904 | 4.573684088   |
| NM_006267    | RANBP2 | 2322 | 2414 | 4.49356247879 |
| NM_006267    | RANBP2 | 7309 | 7432 | 5.57770168817 |
| NM_006267    | RANBP2 | 726  | 838  | 7.38505661023 |
| NM_006267    | RANBP2 | 2918 | 2979 | 5.49356247879 |
| NM_006267    | RANBP2 | 1971 | 2085 | 4.57770168817 |
| NM_006267    | RANBP2 | 1522 | 1598 | 4.57769495712 |
| NM_006267    | RANBP2 | 9513 | 9589 | 5.57769495712 |
| NM_006267    | RANBP2 | 3047 | 3193 | 6.57770168817 |
| NM_015871    | ZNF593 | 288  | 341  | 6.67134403867 |
| NM_006268    | DPF2   | 1867 | 1900 | 5.72305486396 |
| NM_006268    | DPF2   | 1114 | 1210 | 7.80719407334 |
| NM_006268    | DPF2   | 594  | 649  | 7.38813897389 |
| NM_006268    | DPF2   | 1212 | 1309 | 6.80719407334 |
| NM_006268    | DPF2   | 215  | 296  | 5.80702032303 |
| NM_006268    | DPF2   | 739  | 808  | 6.80317647317 |
| NM_001172631 | TECPR2 | 249  | 300  | 9.49999420634 |
| NM_153336    | PSTK   | 1185 | 1238 | 6.85730549621 |
| NM_004807    | HS6ST1 | 480  | 509  | 4.98297749714 |
| NM_004807    | HS6ST1 | 2227 | 2298 | 4.06309910635 |
| NM_004807    | HS6ST1 | 930  | 977  | 5.0669429562  |
| NM_004807    | HS6ST1 | 2129 | 2180 | 4.06710997547 |
| NM_004807    | HS6ST1 | 3717 | 3788 | 4.06711669897 |
| NM_004807    | HS6ST1 | 1065 | 1111 | 4.0669429562  |
| NM_004807    | HS6ST1 | 3085 | 3176 | 4.06711669897 |
| NM_004807    | HS6ST1 | 2301 | 2470 | 6.65207920724 |
| NM_004805    | POLR2D | 361  | 401  | 5.59964677513 |
| NM_004805    | POLR2D | 1576 | 1613 | 6.60349062498 |
| NM_004805    | POLR2D | 849  | 902  | 4.59964677513 |
| NM_004804    | CIAO1  | 535  | 617  | 6.46418384409 |
| NM_004804    | CIAO1  | 832  | 871  | 5.72721825014 |
| NM_004804    | CIAO1  | 2841 | 2955 | 5.72721825014 |
| NM_004804    | CIAO1  | 184  | 251  | 5.1422557492  |
| NM_004804    | CIAO1  | 922  | 1034 | 6.72721825014 |
| NM_004804    | CIAO1  | 3230 | 3272 | 5.1420819991  |

|           |         |      |      |                |
|-----------|---------|------|------|----------------|
| NM_004804 | CIA01   | 3634 | 3769 | 6.14225574942  |
| NM_004804 | CIA01   | 425  | 497  | 6.46418384409  |
| NM_004804 | CIA01   | 3425 | 3487 | 4.14225574187  |
| NM_004800 | TM9SF2  | 797  | 843  | 4.65828225385  |
| NM_004800 | TM9SF2  | 125  | 322  | 8.24325148562  |
| NM_004800 | TM9SF2  | 2534 | 2843 | 8.74575182615  |
| NM_004800 | TM9SF2  | 850  | 2387 | 11.8012469387  |
| NM_004800 | TM9SF2  | 2413 | 2462 | 2.9891872748   |
| NM_004800 | TM9SF2  | 324  | 796  | 9.6880363283   |
| NM_001948 | DUT     | 34   | 144  | 4.70911934937  |
| NM_001948 | DUT     | 319  | 385  | 4.70911262587  |
| NM_001948 | DUT     | 386  | 501  | 6.03104745181  |
| NM_001948 | DUT     | 219  | 317  | 5.29408185765  |
| NM_006405 | TM9SF1  | 1294 | 1371 | 9.04768181395  |
| NM_006405 | TM9SF1  | 1955 | 2032 | 8.04768181395  |
| NM_006405 | TM9SF1  | 515  | 577  | 8.63264431467  |
| NM_006405 | TM9SF1  | 2400 | 2469 | 6.46254556291  |
| NM_006405 | TM9SF1  | 580  | 1291 | 11.9705139534  |
| NM_006405 | TM9SF1  | 383  | 508  | 8.63264431467  |
| NM_006405 | TM9SF1  | 2059 | 2346 | 10.855036736   |
| NM_006405 | TM9SF1  | 1372 | 1941 | 11.6525438721  |
| NM_003164 | STX5    | 109  | 136  | 4.9504932232   |
| NM_003164 | STX5    | 1182 | 1282 | 7.53545572414  |
| NM_003167 | SULT2A1 | 812  | 900  | 2.40738225938  |
| NM_003167 | SULT2A1 | 967  | 1018 | 0.738287280329 |
| NM_003167 | SULT2A1 | 656  | 810  | 3.1443545846   |
| NM_006406 | PRDX4   | 12   | 50   | 5.21666951812  |
| NM_006406 | PRDX4   | 55   | 221  | 7.38659452711  |
| NM_006406 | PRDX4   | 242  | 385  | 7.91710924381  |
| NM_006406 | PRDX4   | 400  | 903  | 10.1939494492  |
| NM_003161 | RPS6KB1 | 1362 | 1407 | 6.88646657164  |
| NM_003161 | RPS6KB1 | 2168 | 2229 | 5.30133055652  |
| NM_006400 | DCTN2   | 594  | 665  | 3.38748327601  |
| NM_006400 | DCTN2   | 1763 | 1874 | 5.97244577673  |
| NM_006400 | DCTN2   | 301  | 374  | 4.97244577673  |
| NM_006400 | DCTN2   | 880  | 946  | 5.38748327601  |
| NM_006400 | DCTN2   | 738  | 774  | 3.38748327601  |
| NM_006400 | DCTN2   | 780  | 851  | 4.38748327601  |
| NM_006400 | DCTN2   | 1686 | 1737 | 4.30334406663  |
| NM_006400 | DCTN2   | 398  | 581  | 6.97244577673  |
| NM_006400 | DCTN2   | 1312 | 1487 | 5.97244577673  |
| NM_006400 | DCTN2   | 954  | 1196 | 7.08792299415  |
| NM_006403 | NEDD9   | 2864 | 2909 | 3.49510707226  |
| NM_006403 | NEDD9   | 2472 | 2531 | 2.49510707226  |
| NM_006403 | NEDD9   | 1314 | 1375 | 2.49510707226  |
| NM_006409 | ARPC1A  | 1257 | 1327 | 4.44145934036  |
| NM_006409 | ARPC1A  | 1359 | 1435 | 5.44146607119  |
| NM_006409 | ARPC1A  | 268  | 352  | 6.02642857213  |
| NM_006409 | ARPC1A  | 837  | 898  | 7.24882099347  |
| NM_006409 | ARPC1A  | 387  | 566  | 7.7633941663   |

|              |             |      |      |               |               |
|--------------|-------------|------|------|---------------|---------------|
| NM_006409    | ARPC1A      | 602  | 667  | 6.44145934036 |               |
| NM_006409    | ARPC1A      | 1076 | 1222 | 6.44146607141 |               |
| NM_006409    | ARPC1A      | 89   | 240  | 6.44146607141 |               |
| NM_006409    | ARPC1A      | 904  | 1076 | 7.61139107285 |               |
| NM_003168    | SUPT4H1     | 228  | 283  | 3.7249227134  |               |
| NM_003168    | SUPT4H1     | 383  | 446  | 3.72492247748 |               |
| NM_003168    | SUPT4H1     | 747  | 787  | 1.72090511323 |               |
| NM_003168    | SUPT4H1     | 495  | 563  | 3.72491598235 |               |
| NM_003168    | SUPT4H1     | 662  | 697  | 1.72090511323 |               |
| NM_003168    | SUPT4H1     | 847  | 926  | 1.72492247748 |               |
| NM_003168    | SUPT4H1     | 55   | 224  | 4.89484771484 |               |
| NM_175849    | DNMT3B      | 2048 | 2111 | 10.6064261006 |               |
| NM_005678    | SNURF       | 407  | 477  | 5.9419043822  |               |
| NM_005678    | SNURF       | 489  | 546  | 5.52669313261 |               |
| NM_005678    | SNURF       | 1214 | 1274 | 3.94190437466 |               |
| NM_023080    | C8orf33     | 2281 | 2326 | 6.17803655085 |               |
| NM_023080    | C8orf33     | 1183 | 1238 | 6.25815816006 |               |
| NM_023080    | C8orf33     | 853  | 894  | 6.25815816006 |               |
| NM_023080    | C8orf33     | 1789 | 1833 | 7.76299905157 |               |
| NM_006080    | SEMA3A      | 5523 | 5638 | 13.2773986064 |               |
| NM_006080    | SEMA3A      | 4518 | 4559 | 13.2773918753 |               |
| NM_006080    | SEMA3A      | 2880 | 2930 | 12.2773983705 |               |
| NM_006080    | SEMA3A      | 4308 | 4356 | 13.2772248561 |               |
| NM_006080    | SEMA3A      | 666  | 987  | 17.7692517027 |               |
| NM_006080    | SEMA3A      | 3195 | 3276 | 13.8623611071 |               |
| NM_006080    | SEMA3A      | 4951 | 5015 | 12.2733810062 |               |
| NM_006080    | SEMA3A      | 2627 | 2671 | 13.2773986062 |               |
| NM_006080    | SEMA3A      | 1815 | 1845 | 12.193259397  |               |
| NM_006080    | SEMA3A      | 4182 | 4234 | 13.8623611071 |               |
| NM_006080    | SEMA3A      | 3301 | 3419 | 15.8623611071 |               |
| NM_006080    | SEMA3A      | 3645 | 3815 | 15.2773986064 |               |
| NM_006080    | SEMA3A      | 3077 | 3185 | 14.2773986064 |               |
| NM_006080    | SEMA3A      | 1965 | 2397 | 17.5253261198 |               |
| NM_006080    | SEMA3A      | 484  | 664  | 16.0847535284 |               |
| NM_006080    | SEMA3A      | 1419 | 1798 | 17.9498239483 |               |
| NM_006080    | SEMA3A      | 2420 | 2501 | 13.8623611071 |               |
| NM_006080    | SEMA3A      | 2983 | 3072 | 13.8623611071 |               |
| NM_006080    | SEMA3A      | 1853 | 1960 | 15.736830225  |               |
| NM_006080    | SEMA3A      | 91   | 449  | 17.3648614476 |               |
| NM_006080    | SEMA3A      | 1012 | 1378 | 17.4473236078 |               |
| NM_001202470 | RPS10-NUDT3 |      | 1112 | 1156          | 1.92245661243 |
| NM_001202470 | RPS10-NUDT3 |      | 1167 | 1216          | 2.92228286966 |
| NM_001202470 | RPS10-NUDT3 |      | 56   | 220           | 5.5074191207  |
| NM_001202470 | RPS10-NUDT3 |      | 1219 | 1284          | 1.83831741059 |
| NM_001202470 | RPS10-NUDT3 |      | 1288 | 1336          | 1.9184390198  |
| NM_001202470 | RPS10-NUDT3 |      | 232  | 537           | 6.5074191207  |
| NM_001202470 | RPS10-NUDT3 |      | 1789 | 1877          | 2.92245661243 |
| NM_001202470 | RPS10-NUDT3 |      | 907  | 1013          | 3.92245661998 |
| NM_001202470 | RPS10-NUDT3 |      | 2012 | 2110          | 2.92245661998 |
| NM_001081562 | DMPK        | 976  | 1010 | 7.70085129479 |               |

|              |           |      |      |               |               |
|--------------|-----------|------|------|---------------|---------------|
| NM_001081562 | DMPK      | 388  | 453  | 8.780972904   |               |
| NM_001081562 | DMPK      | 616  | 684  | 8.780972904   |               |
| NM_001003796 | NHP2L1    | 976  | 1034 | 7.40765694663 |               |
| NM_001003796 | NHP2L1    | 478  | 520  | 6.40748319631 |               |
| NM_001003796 | NHP2L1    | 1336 | 1405 | 6.99244569703 |               |
| NM_001003796 | NHP2L1    | 254  | 356  | 7.72958504152 |               |
| NM_001003796 | NHP2L1    | 379  | 437  | 5.40363934646 |               |
| NM_001003796 | NHP2L1    | 542  | 638  | 5.40765693908 |               |
| NM_001003795 | GTF2IRD2B |      | 595  | 667           | 8.63432752921 |
| NM_001003795 | GTF2IRD2B |      | 698  | 744           | 9.21929002992 |
| NM_138777    | MRRF      | 822  | 897  | 4.72264721663 |               |
| NM_138777    | MRRF      | 302  | 377  | 4.71863634751 |               |
| NM_138777    | MRRF      | 716  | 755  | 3.6385147383  |               |
| NM_138777    | MRRF      | 1014 | 1068 | 4.72264721663 |               |
| NM_001098416 | HDAC7     | 1138 | 1195 | 10.4104753039 |               |
| NM_013296    | GPSM2     | 249  | 345  | 9.03156688146 |               |
| NM_014018    | MRPS28    | 442  | 497  | 4.13168473173 |               |
| NM_014018    | MRPS28    | 19   | 68   | 5.13168473173 |               |
| NM_014018    | MRPS28    | 230  | 426  | 7.37961224518 |               |
| NM_014018    | MRPS28    | 72   | 146  | 3.13168449581 |               |
| NM_014018    | MRPS28    | 497  | 656  | 5.93903965379 |               |
| NM_013291    | CPSF1     | 4040 | 4078 | 5.18696502126 |               |
| NM_013291    | CPSF1     | 3715 | 3758 | 6.19098238552 |               |
| NM_013291    | CPSF1     | 1382 | 1429 | 5.19098238552 |               |
| NM_013291    | CPSF1     | 1555 | 1622 | 6.19098262121 |               |
| NM_013291    | CPSF1     | 1769 | 1810 | 5.10684341205 |               |
| NM_013291    | CPSF1     | 367  | 472  | 7.51291071632 |               |
| NM_013291    | CPSF1     | 1886 | 1926 | 6.77192752198 |               |
| NM_013291    | CPSF1     | 3845 | 3901 | 6.19097589038 |               |
| NM_013291    | CPSF1     | 645  | 718  | 6.19098262144 |               |
| NM_013291    | CPSF1     | 3340 | 3409 | 5.18696502126 |               |
| NM_013291    | CPSF1     | 126  | 242  | 6.19098262144 |               |
| NM_013291    | CPSF1     | 2962 | 3038 | 5.19098262144 |               |
| NM_013291    | CPSF1     | 1460 | 1537 | 6.19097589038 |               |
| NM_014015    | DEXI      | 448  | 540  | 9.94358096001 |               |
| NM_014015    | DEXI      | 1080 | 1167 | 7.94358096001 |               |
| NM_014015    | DEXI      | 633  | 740  | 9.94358096001 |               |
| NM_014014    | SNRNP200  |      | 5069 | 5154          | 6.28155254007 |
| NM_014014    | SNRNP200  |      | 503  | 615           | 4.95962444518 |
| NM_014014    | SNRNP200  |      | 2480 | 2601          | 6.12954944662 |
| NM_014014    | SNRNP200  |      | 144  | 243           | 5.76697936724 |
| NM_014014    | SNRNP200  |      | 3660 | 3708          | 2.95962420926 |
| NM_014014    | SNRNP200  |      | 950  | 1071          | 6.28155254007 |
| NM_014014    | SNRNP200  |      | 6683 | 6736          | 2.95962443763 |
| NM_014014    | SNRNP200  |      | 5761 | 5822          | 3.95962444496 |
| NM_014014    | SNRNP200  |      | 1141 | 1201          | 4.5445869459  |
| NM_014014    | SNRNP200  |      | 3844 | 3977          | 6.86651504079 |
| NM_014014    | SNRNP200  |      | 1549 | 1738          | 7.04708728643 |
| NM_014014    | SNRNP200  |      | 4959 | 5027          | 2.95962420926 |
| NM_014014    | SNRNP200  |      | 2901 | 2942          | 4.95962444496 |

|              |             |      |      |               |
|--------------|-------------|------|------|---------------|
| NM_014014    | SNRNP200    | 1213 | 1259 | 2.95961771412 |
| NM_014014    | SNRNP200    | 3978 | 4101 | 5.5445869459  |
| NM_014014    | SNRNP200    | 2346 | 2479 | 6.41905606381 |
| NM_014014    | SNRNP200    | 6361 | 6428 | 3.955606845   |
| NM_014014    | SNRNP200    | 2640 | 2713 | 4.95962444518 |
| NM_014014    | SNRNP200    | 4523 | 4564 | 2.95962443763 |
| NM_014014    | SNRNP200    | 6749 | 6822 | 5.28155254007 |
| NM_014014    | SNRNP200    | 4681 | 4761 | 2.95961771412 |
| NM_014014    | SNRNP200    | 4576 | 4664 | 4.95962444518 |
| NM_014014    | SNRNP200    | 3297 | 3651 | 7.95962444518 |
| NM_014014    | SNRNP200    | 628  | 692  | 5.28155254007 |
| NM_014014    | SNRNP200    | 2970 | 3102 | 5.95962444518 |
| NM_014014    | SNRNP200    | 5927 | 6043 | 5.5445869459  |
| NM_014014    | SNRNP200    | 701  | 778  | 4.5445869459  |
| NM_014014    | SNRNP200    | 264  | 351  | 2.95962444496 |
| NM_014014    | SNRNP200    | 2808 | 2901 | 4.95962444518 |
| NM_014014    | SNRNP200    | 4407 | 4483 | 2.95962444518 |
| NM_014014    | SNRNP200    | 827  | 940  | 5.28155254007 |
| NM_014014    | SNRNP200    | 6045 | 6167 | 5.5445869459  |
| NM_014014    | SNRNP200    | 6461 | 6644 | 6.28155254007 |
| NM_014014    | SNRNP200    | 4836 | 4955 | 6.28155254007 |
| NM_014014    | SNRNP200    | 5287 | 5753 | 8.08890746212 |
| NM_014014    | SNRNP200    | 4108 | 4400 | 6.5445869459  |
| NM_014014    | SNRNP200    | 378  | 490  | 5.28155254007 |
| NM_014014    | SNRNP200    | 2054 | 2328 | 7.28155254007 |
| NM_014014    | SNRNP200    | 1262 | 1527 | 6.66006416332 |
| NM_014014    | SNRNP200    | 3105 | 3284 | 5.28155254007 |
| NM_014014    | SNRNP200    | 3711 | 3842 | 5.76697936724 |
| NM_014014    | SNRNP200    | 1775 | 1925 | 6.28155254007 |
| NM_001039618 | CREBZF 1623 | 1667 |      | 5.24298849644 |
| NM_001039618 | CREBZF 3182 | 3264 |      | 5.23897762732 |
| NM_001039618 | CREBZF 3657 | 3741 |      | 5.24282147718 |
| NM_001039618 | CREBZF 5985 | 6100 |      | 6.82795772821 |
| NM_001039618 | CREBZF 5164 | 5220 |      | 6.82795772822 |
| NM_001039618 | CREBZF 5274 | 5393 |      | 7.56492332238 |
| NM_001039618 | CREBZF 3007 | 3077 |      | 5.15885601811 |
| NM_001039618 | CREBZF 4925 | 5103 |      | 7.56492332238 |
| NM_001039618 | CREBZF 4220 | 4288 |      | 6.23897762732 |
| NM_001039618 | CREBZF 1511 | 1571 |      | 6.82394012804 |
| NM_001039618 | CREBZF 543  | 638  |      | 7.24299521994 |
| NM_001039618 | CREBZF 3554 | 3652 |      | 5.23897762732 |
| NM_001039618 | CREBZF 1227 | 1339 |      | 6.82795772822 |
| NM_001039618 | CREBZF 5106 | 5162 |      | 6.24299522727 |
| NM_014016    | SACM1L 797  | 871  |      | 7.58979813866 |
| NM_014016    | SACM1L 249  | 312  |      | 6.58578053848 |
| NM_014016    | SACM1L 2336 | 2380 |      | 5.58578053848 |
| NM_014016    | SACM1L 1641 | 1772 |      | 6.58578053848 |
| NM_013299    | SAC3D1 1055 | 1114 |      | 7.36470956872 |
| NM_001008216 | GALE 325    | 397  |      | 7.13126926447 |
| NM_001008216 | GALE 220    | 265  |      | 5.80532356941 |



|              |          |      |      |               |               |
|--------------|----------|------|------|---------------|---------------|
| NM_001008216 | GALE     | 644  | 689  | 5.80916741927 |               |
| NM_001008216 | GALE     | 1100 | 1187 | 6.80934116958 |               |
| NM_001008216 | GALE     | 443  | 520  | 6.39430367031 |               |
| NM_001008216 | GALE     | 932  | 1044 | 5.80934093367 |               |
| NM_001008212 | OPTN     | 839  | 905  | 2.27374988664 |               |
| NM_001008212 | OPTN     | 1172 | 1298 | 3.27375638177 |               |
| NM_001008212 | OPTN     | 590  | 639  | 2.18961740831 |               |
| NM_001008212 | OPTN     | 441  | 532  | 3.85871911086 |               |
| NM_015634    | KIAA1279 |      | 1452 | 1498          | 5.80672633414 |
| NM_015634    | KIAA1279 |      | 1269 | 1327          | 6.72660472493 |
| NM_015634    | KIAA1279 |      | 1189 | 1241          | 6.810570184   |
| NM_015634    | KIAA1279 |      | 521  | 593           | 5.81073720326 |
| NM_015634    | KIAA1279 |      | 1505 | 1549          | 7.8107436984  |
| NM_152455    | ZSCAN29  | 3126 | 3222 | 6.10851972182 |               |
| NM_183240    | TMEM37   | 340  | 394  | 7.40248573882 |               |
| NM_183240    | TMEM37   | 105  | 230  | 9.57241747131 |               |
| NM_183240    | TMEM37   | 849  | 924  | 6.40248573882 |               |
| NM_183240    | TMEM37   | 409  | 603  | 9.57241747131 |               |
| NM_148415    | ATXN2L   | 3345 | 3388 | 4.85934945912 |               |
| NM_148415    | ATXN2L   | 2345 | 2410 | 5.85952320944 |               |
| NM_148415    | ATXN2L   | 2009 | 2058 | 4.85952297352 |               |
| NM_148415    | ATXN2L   | 1822 | 1866 | 5.85952320943 |               |
| NM_148415    | ATXN2L   | 2247 | 2324 | 7.18145130433 |               |
| NM_148415    | ATXN2L   | 768  | 824  | 6.44448570261 |               |
| NM_148415    | ATXN2L   | 1127 | 1175 | 5.85934945912 |               |
| NM_148415    | ATXN2L   | 3590 | 3775 | 8.31895482808 |               |
| NM_148415    | ATXN2L   | 834  | 904  | 6.44431195984 |               |
| NM_148415    | ATXN2L   | 154  | 224  | 7.44448571016 |               |
| NM_148415    | ATXN2L   | 2918 | 2981 | 4.77538400005 |               |
| NM_148415    | ATXN2L   | 1447 | 1535 | 7.6668781315  |               |
| NM_148415    | ATXN2L   | 2680 | 2786 | 5.85952320944 |               |
| NM_148415    | ATXN2L   | 1592 | 1810 | 8.02944821088 |               |
| NM_148415    | ATXN2L   | 1880 | 2007 | 8.02944821088 |               |
| NM_148415    | ATXN2L   | 2154 | 2247 | 5.85952320943 |               |
| NM_148415    | ATXN2L   | 911  | 1016 | 7.18145130433 |               |
| NM_148415    | ATXN2L   | 584  | 755  | 8.18145130433 |               |
| NM_148415    | ATXN2L   | 1297 | 1388 | 5.85952320944 |               |
| NM_148415    | ATXN2L   | 1039 | 1125 | 5.85952320944 |               |
| NM_002567    | PEBP1    | 228  | 282  | 2.34635502466 |               |
| NM_002567    | PEBP1    | 487  | 531  | 3.93533512556 |               |
| NM_002567    | PEBP1    | 142  | 206  | 4.35037262484 |               |
| NM_002567    | PEBP1    | 379  | 481  | 5.15772754689 |               |
| NM_002567    | PEBP1    | 59   | 136  | 4.67230071972 |               |
| NM_002567    | PEBP1    | 1092 | 1127 | 3.26623341545 |               |
| NM_002567    | PEBP1    | 1349 | 1488 | 5.52029762628 |               |
| NM_002567    | PEBP1    | 296  | 378  | 5.15772754689 |               |
| NM_002567    | PEBP1    | 760  | 987  | 6.43783546609 |               |
| NM_002567    | PEBP1    | 556  | 747  | 6.15772754689 |               |
| NM_144568    | TMEM55B  | 690  | 734  | 9.13367310348 |               |
| NM_002560    | P2RX4    | 818  | 884  | 7.89161917847 |               |

|              |          |      |      |      |                 |
|--------------|----------|------|------|------|-----------------|
| NM_001039479 | KIAA0317 |      | 2265 | 2325 | 6.04487818611   |
| NM_001039479 | KIAA0317 |      | 1799 | 1858 | 5.96091272705   |
| NM_001039479 | KIAA0317 |      | 3171 | 3233 | 7.04103433626   |
| NM_001039479 | KIAA0317 |      | 217  | 283  | 8.04504520538   |
| NM_001039479 | KIAA0317 |      | 4981 | 5061 | 7.04505192888   |
| NM_001039479 | KIAA0317 |      | 1940 | 2020 | 6.04505192888   |
| NM_001039479 | KIAA0317 |      | 2203 | 2248 | 7.04487818611   |
| NM_001039479 | KIAA0317 |      | 1022 | 1060 | 7.54587522777   |
| NM_001039479 | KIAA0317 |      | 559  | 602  | 6.96091272705   |
| NM_001039479 | KIAA0317 |      | 2818 | 2849 | 5.96091272705   |
| NM_001039479 | KIAA0317 |      | 286  | 362  | 7.6300077061    |
| NM_001039479 | KIAA0317 |      | 2350 | 2445 | 7.04505193643   |
| NM_001039479 | KIAA0317 |      | 4756 | 4870 | 7.63001443715   |
| NM_000252    | MTM1     | 319  | 354  |      | 6.69033666851   |
| NM_000252    | MTM1     | 1650 | 1709 |      | 7.69033666851   |
| NM_000252    | MTM1     | 1470 | 1534 |      | 8.27931003835   |
| NM_002267    | KPNA3    | 1177 | 1252 |      | 6.70879693518   |
| NM_002267    | KPNA3    | 1649 | 1705 |      | 6.70477933501   |
| NM_002267    | KPNA3    | 1062 | 1111 |      | 5.12366068414   |
| NM_002267    | KPNA3    | 965  | 1057 |      | 5.12382770341   |
| NM_002568    | PABPC1   | 2385 | 2459 |      | 1.36865205219   |
| NM_002568    | PABPC1   | 543  | 592  |      | 0.146259630843  |
| NM_002568    | PABPC1   | 238  | 272  |      | -0.522842079256 |
| NM_002568    | PABPC1   | 2636 | 2683 |      | -0.43887662019  |
| NM_002568    | PABPC1   | 2459 | 2584 |      | 0.883225225015  |
| NM_002568    | PABPC1   | 1542 | 1631 |      | 1.56129713013   |
| NM_002568    | PABPC1   | 2074 | 2381 |      | 3.73122213157   |
| NM_002568    | PABPC1   | 3    | 79   |      | 0.561297130122  |
| NM_002568    | PABPC1   | 2716 | 2852 |      | 2.46818772574   |
| NM_002568    | PABPC1   | 319  | 514  |      | 1.73122213157   |
| NM_002568    | PABPC1   | 1650 | 1943 |      | 3.36865205219   |
| NM_002568    | PABPC1   | 593  | 1531 |      | 5.56129713013   |
| NM_002568    | PABPC1   | 1959 | 2064 |      | -0.438702869872 |
| NM_002569    | FURIN    | 552  | 639  |      | 9.21124619191   |
| NM_002569    | FURIN    | 2698 | 2770 |      | 8.21124619191   |
| NM_002569    | FURIN    | 1715 | 1781 |      | 9.5331742868    |
| NM_002569    | FURIN    | 1252 | 1358 |      | 8.79620869263   |
| NM_002569    | FURIN    | 1142 | 1208 |      | 7.21124619191   |
| NM_002569    | FURIN    | 3296 | 3346 |      | 8.21124619191   |
| NM_002569    | FURIN    | 414  | 508  |      | 9.5331742868    |
| NM_002569    | FURIN    | 2021 | 2100 |      | 8.21124595599   |
| NM_002569    | FURIN    | 2238 | 2315 |      | 9.21124619191   |
| NM_002569    | FURIN    | 3091 | 3139 |      | 8.79620196158   |
| NM_002569    | FURIN    | 867  | 929  |      | 9.21124619191   |
| NM_002569    | FURIN    | 1840 | 2014 |      | 10.5331742868   |
| NM_002569    | FURIN    | 3357 | 3425 |      | 9.21124619191   |
| NM_002569    | FURIN    | 2129 | 2216 |      | 8.21124619191   |
| NM_002569    | FURIN    | 647  | 863  |      | 11.018601114    |
| NM_002569    | FURIN    | 2436 | 2681 |      | 11.2987090332   |
| NM_002569    | FURIN    | 3887 | 3978 |      | 9.21124619191   |

|              |           |      |      |               |               |
|--------------|-----------|------|------|---------------|---------------|
| NM_002569    | FURIN     | 4100 | 4242 | 8.79620869263 |               |
| NM_002569    | FURIN     | 2927 | 3090 | 10.018601114  |               |
| NM_002569    | FURIN     | 1429 | 1577 | 10.018601114  |               |
| NM_002569    | FURIN     | 3489 | 3732 | 11.8551023817 |               |
| NM_002569    | FURIN     | 311  | 408  | 9.5331742868  |               |
| NM_002569    | FURIN     | 931  | 1086 | 9.5331742868  |               |
| NM_002569    | FURIN     | 1579 | 1672 | 7.21124619191 |               |
| NM_001260    | CDK8      | 156  | 245  | 5.36074162364 |               |
| NM_001260    | CDK8      | 280  | 350  | 6.94570389599 |               |
| NM_005698    | SCAMP3    | 120  | 179  | 7.02909348778 |               |
| NM_005698    | SCAMP3    | 1259 | 1304 | 8.02909348778 |               |
| NM_005698    | SCAMP3    | 191  | 266  | 6.02908675673 |               |
| NM_005698    | SCAMP3    | 1317 | 1563 | 10.116556329  |               |
| NM_005698    | SCAMP3    | 431  | 597  | 7.6140559885  |               |
| NM_005698    | SCAMP3    | 617  | 675  | 6.9449542784  |               |
| NM_005698    | SCAMP3    | 675  | 1174 | 11.7839809899 |               |
| NM_005694    | COX17     | 241  | 385  | 5.7084046053  |               |
| NM_005694    | COX17     | 5    | 235  | 7.12344210458 |               |
| NM_005697    | SCAMP2    | 921  | 981  | 6.72850073655 |               |
| NM_005697    | SCAMP2    | 1084 | 1134 | 9.53585566615 |               |
| NM_005697    | SCAMP2    | 884  | 921  | 6.72448314392 |               |
| NM_005697    | SCAMP2    | 989  | 1021 | 6.64436153471 |               |
| NM_005697    | SCAMP2    | 691  | 828  | 10.1879323627 |               |
| NM_005697    | SCAMP2    | 1172 | 1196 | 6.72849401304 |               |
| NM_005697    | SCAMP2    | 68   | 216  | 8.7285007441  |               |
| NM_005697    | SCAMP2    | 253  | 684  | 11.9379541097 |               |
| NM_001122752 | SERPINI1  |      | 1076 | 1158          | 9.7044236562  |
| NM_001122752 | SERPINI1  |      | 738  | 828           | 8.85642674964 |
| NM_001122752 | SERPINI1  |      | 1620 | 1659          | 8.53449865454 |
| NM_001122752 | SERPINI1  |      | 171  | 240           | 9.85642674964 |
| NM_001122752 | SERPINI1  |      | 278  | 327           | 8.85642674964 |
| NM_001122752 | SERPINI1  |      | 863  | 919           | 7.53449841884 |
| NM_001122752 | SERPINI1  |      | 347  | 399           | 8.53449865476 |
| NM_001122752 | SERPINI1  |      | 1228 | 1333          | 9.99393027339 |
| NM_001122752 | SERPINI1  |      | 586  | 733           | 9.53449865476 |
| NM_001122752 | SERPINI1  |      | 921  | 1046          | 9.11946115548 |
| NM_001122752 | SERPINI1  |      | 1341 | 1549          | 10.1194611555 |
| NM_032490    | C14orf142 |      | 242  | 326           | 5.70964351642 |
| NM_145212    | MRPL30    | 2308 | 2359 | 5.29050501056 |               |
| NM_145212    | MRPL30    | 1607 | 1649 | 4.21038340135 |               |
| NM_145212    | MRPL30    | 2175 | 2209 | 4.29434886042 |               |
| NM_018022    | TMEM51    | 894  | 998  | 7.18049494435 |               |
| NM_018022    | TMEM51    | 234  | 405  | 9.98785659746 |               |
| NM_018022    | TMEM51    | 1530 | 1658 | 9.50242977029 |               |
| NM_018023    | YEATS2    | 1202 | 1257 | 5.32546880801 |               |
| NM_018023    | YEATS2    | 390  | 433  | 6.32547530314 |               |
| NM_018023    | YEATS2    | 4273 | 4315 | 6.24133632968 |               |
| NM_018023    | YEATS2    | 2897 | 2989 | 5.32546880801 |               |
| NM_018023    | YEATS2    | 229  | 295  | 6.32145793889 |               |
| NM_018023    | YEATS2    | 5016 | 5079 | 5.32547553884 |               |

|           |         |      |      |               |
|-----------|---------|------|------|---------------|
| NM_018023 | YEATS2  | 3916 | 4044 | 6.91043803978 |
| NM_032493 | AP1M1   | 1683 | 1765 | 7.7878595781  |
| NM_032493 | AP1M1   | 992  | 1042 | 7.20272332728 |
| NM_032493 | AP1M1   | 928  | 983  | 6.2028970776  |
| NM_032493 | AP1M1   | 1580 | 1619 | 7.78768582801 |
| NM_032493 | AP1M1   | 661  | 733  | 7.7878595781  |
| NM_032493 | AP1M1   | 448  | 568  | 8.52482517249 |
| NM_032493 | AP1M1   | 1838 | 1941 | 8.2028970776  |
| NM_032493 | AP1M1   | 1178 | 1280 | 7.2028970776  |
| NM_018026 | PACS1   | 1206 | 1283 | 8.24922686747 |
| NM_018026 | PACS1   | 1566 | 1631 | 7.24905311715 |
| NM_018026 | PACS1   | 2230 | 2266 | 7.2452092673  |
| NM_018026 | PACS1   | 3993 | 4064 | 9.83418936819 |
| NM_018026 | PACS1   | 1463 | 1542 | 8.24922686747 |
| NM_018026 | PACS1   | 909  | 993  | 10.2492268675 |
| NM_018026 | PACS1   | 1158 | 1206 | 7.16508765809 |
| NM_018026 | PACS1   | 301  | 361  | 7.2452092673  |
| NM_018026 | PACS1   | 3817 | 3878 | 7.2452092673  |
| NM_018026 | PACS1   | 3701 | 3802 | 8.83418936819 |
| NM_018026 | PACS1   | 1929 | 1999 | 7.24922686747 |
| NM_018026 | PACS1   | 487  | 656  | 10.2492268675 |
| NM_018026 | PACS1   | 996  | 1062 | 8.24922686747 |
| NM_018026 | PACS1   | 425  | 477  | 8.83017176802 |
| NM_018026 | PACS1   | 2364 | 2506 | 8.24922686747 |
| NM_018026 | PACS1   | 722  | 799  | 9.24922686747 |
| NM_018026 | PACS1   | 3273 | 3362 | 8.24922686747 |
| NM_018026 | PACS1   | 2066 | 2206 | 9.24922686747 |
| NM_139045 | SMARCA2 | 5462 | 5521 | 5.91252694595 |
| NM_139045 | SMARCA2 | 3517 | 3565 | 5.91654453857 |
| NM_018028 | SAMD4B  | 3758 | 3826 | 10.3785077609 |
| NM_018028 | SAMD4B  | 1999 | 2072 | 7.57115283882 |
| NM_018028 | SAMD4B  | 3978 | 4017 | 9.15611510363 |
| NM_018028 | SAMD4B  | 3019 | 3081 | 9.15611533954 |
| NM_018028 | SAMD4B  | 3349 | 3395 | 8.57097908851 |
| NM_018028 | SAMD4B  | 1054 | 1100 | 8.57115260291 |
| NM_018028 | SAMD4B  | 4150 | 4222 | 7.57097908851 |
| NM_018028 | SAMD4B  | 1322 | 1374 | 7.57114610777 |
| NM_018028 | SAMD4B  | 808  | 875  | 8.57115283882 |
| NM_033116 | NEK9    | 3322 | 3368 | 5.72591046849 |
| NM_033116 | NEK9    | 1986 | 2023 | 7.23075136    |
| NM_033116 | NEK9    | 1747 | 1815 | 6.72992783274 |
| NM_033116 | NEK9    | 4213 | 4292 | 6.72975431834 |
| NM_033116 | NEK9    | 4358 | 4417 | 6.72975431834 |
| NM_033116 | NEK9    | 4845 | 4889 | 5.72992133761 |
| NM_033116 | NEK9    | 3583 | 3643 | 5.72992806844 |
| NM_033116 | NEK9    | 5280 | 5337 | 6.72992133761 |
| NM_033116 | NEK9    | 493  | 547  | 5.72591046849 |
| NM_033116 | NEK9    | 801  | 982  | 9.05185616355 |
| NM_033116 | NEK9    | 1502 | 1569 | 5.72992133761 |
| NM_033116 | NEK9    | 994  | 1074 | 8.05185616355 |

|              |        |      |      |               |
|--------------|--------|------|------|---------------|
| NM_033116    | NEK9   | 2223 | 2310 | 6.72992806844 |
| NM_033116    | NEK9   | 2687 | 2821 | 6.72992806866 |
| NM_033116    | NEK9   | 1604 | 1711 | 7.31489056938 |
| NM_033116    | NEK9   | 2333 | 2411 | 5.72975431834 |
| NM_033113    | ZNF628 | 1159 | 1202 | 11.2715102106 |
| NM_033113    | ZNF628 | 2329 | 2372 | 11.2715102106 |
| NM_033112    | RRP36  | 993  | 1037 | 5.30603812964 |
| NM_033112    | RRP36  | 150  | 203  | 3.8052148383  |
| NM_033112    | RRP36  | 1093 | 1148 | 3.80119723813 |
| NM_033112    | RRP36  | 366  | 435  | 5.39000358871 |
| NM_006156    | NEDD8  | 538  | 595  | 4.62784913109 |
| NM_006156    | NEDD8  | 358  | 453  | 3.82049420903 |
| NM_006156    | NEDD8  | 455  | 483  | 3.32131750037 |
| NM_006156    | NEDD8  | 235  | 349  | 4.82049420903 |
| NM_006156    | NEDD8  | 89   | 202  | 3.82049420903 |
| NM_001190836 | DCTN1  | 1464 | 1505 | 4.08149788928 |
| NM_001190836 | DCTN1  | 2770 | 2812 | 4.67047798262 |
| NM_001190836 | DCTN1  | 2644 | 2742 | 4.67047799017 |
| NM_001190836 | DCTN1  | 3112 | 3170 | 4.67047775425 |
| NM_001190836 | DCTN1  | 629  | 679  | 4.00137628007 |
| NM_001190836 | DCTN1  | 2151 | 2189 | 4.08149788928 |
| NM_001190836 | DCTN1  | 4025 | 4070 | 3.0855154819  |
| NM_001190836 | DCTN1  | 568  | 628  | 4.08149788928 |
| NM_001190836 | DCTN1  | 2236 | 2368 | 5.40744358434 |
| NM_001190836 | DCTN1  | 1508 | 1551 | 3.0855087584  |
| NM_001190836 | DCTN1  | 3653 | 3705 | 3.08534173913 |
| NM_001190836 | DCTN1  | 790  | 818  | 3.00137628007 |
| NM_001190836 | DCTN1  | 3174 | 3230 | 3.08149788928 |
| NM_001190836 | DCTN1  | 3919 | 3969 | 4.67047799016 |
| NM_001190836 | DCTN1  | 2370 | 2515 | 5.40744358434 |
| NM_001190836 | DCTN1  | 408  | 520  | 5.08551548945 |
| NM_001190836 | DCTN1  | 886  | 947  | 4.08149788928 |
| NM_001190836 | DCTN1  | 2967 | 3082 | 4.08551548945 |
| NM_001190836 | DCTN1  | 1123 | 1250 | 4.67047799017 |
| NM_001190836 | DCTN1  | 1945 | 2124 | 6.40744358434 |
| NM_001190836 | DCTN1  | 1558 | 1676 | 5.08551548945 |
| NM_145214    | TRIM11 | 1444 | 1492 | 8.3445120415  |
| NM_145214    | TRIM11 | 2563 | 2692 | 11.1558845637 |
| NM_145214    | TRIM11 | 1051 | 1154 | 9.93349214239 |
| NM_144611    | CYB5D2 | 570  | 631  | 8.40765163031 |
| NM_016334    | GPR89B | 1740 | 1822 | 8.99383769955 |
| NM_016334    | GPR89B | 1065 | 1165 | 11.8011926218 |
| NM_016334    | GPR89B | 756  | 798  | 9.57879346944 |
| NM_016334    | GPR89B | 997  | 1057 | 10.5788002005 |
| NM_016334    | GPR89B | 562  | 737  | 12.3861551226 |
| NM_016334    | GPR89B | 1299 | 1550 | 12.5788002005 |
| NM_016334    | GPR89B | 1831 | 1899 | 9.57880020049 |
| NM_016334    | GPR89B | 191  | 538  | 13.3157657947 |
| NM_016334    | GPR89B | 877  | 975  | 10.8011926218 |
| NM_016334    | GPR89B | 1553 | 1604 | 7.99383746386 |

|              |        |      |      |               |
|--------------|--------|------|------|---------------|
| NM_016334    | GPR89B | 1169 | 1276 | 9.5788002005  |
| NM_001142364 | ALG5   | 800  | 851  | 5.54403502938 |
| NM_001142364 | ALG5   | 350  | 426  | 7.12917128042 |
| NM_001142364 | ALG5   | 879  | 989  | 8.45109937531 |
| NM_001142364 | ALG5   | 123  | 205  | 6.86613687459 |
| NM_001142364 | ALG5   | 241  | 348  | 8.12917128042 |
| NM_001142364 | ALG5   | 670  | 789  | 8.71413378114 |
| NM_001142364 | ALG5   | 441  | 662  | 9.00364039834 |
| NM_148923    | CYB5A  | 288  | 361  | 5.34659663076 |
| NM_148923    | CYB5A  | 660  | 720  | 3.75761652987 |
| NM_148923    | CYB5A  | 494  | 630  | 4.76163413004 |
| NM_148923    | CYB5A  | 53   | 160  | 4.34659663076 |
| NM_025234    | WDR61  | 833  | 916  | 7.33250039349 |
| NM_025234    | WDR61  | 649  | 700  | 5.75154876188 |
| NM_001099436 | ULK3   | 1771 | 1822 | 8.04668175349 |
| NM_001099436 | ULK3   | 2187 | 2239 | 8.04668175349 |
| NM_001099436 | ULK3   | 1295 | 1348 | 8.04667525835 |
| NM_001099436 | ULK3   | 2398 | 2572 | 10.8540369115 |
| NM_001099436 | ULK3   | 1436 | 1575 | 10.3686100843 |
| NM_005038    | PPID   | 955  | 1007 | 2.2471076019  |
| NM_005038    | PPID   | 1038 | 1087 | 3.24326375205 |
| NM_005038    | PPID   | 694  | 787  | 2.24728134467 |
| NM_014908    | DOLK   | 796  | 822  | 9.42674688815 |
| NM_014908    | DOLK   | 589  | 618  | 8.42674688815 |
| NM_014908    | DOLK   | 183  | 243  | 10.095848598  |
| NM_014908    | DOLK   | 1107 | 1191 | 11.680811099  |
| NM_014908    | DOLK   | 694  | 748  | 9.50686849736 |
| NM_014908    | DOLK   | 1562 | 1709 | 10.5108860975 |
| NM_014908    | DOLK   | 884  | 1000 | 10.5108860975 |
| NM_014908    | DOLK   | 1197 | 1297 | 10.0958485983 |
| NM_014908    | DOLK   | 1805 | 1938 | 11.680811099  |
| NM_005030    | PLK1   | 1385 | 1444 | 4.4740243138  |
| NM_005030    | PLK1   | 933  | 986  | 5.4740243138  |
| NM_005030    | PLK1   | 1547 | 1615 | 5.4740243138  |
| NM_005030    | PLK1   | 2020 | 2064 | 7.05898681452 |
| NM_005030    | PLK1   | 1637 | 1740 | 5.4740243138  |
| NM_005030    | PLK1   | 741  | 895  | 6.4740243138  |
| NM_005030    | PLK1   | 232  | 341  | 7.4740243138  |
| NM_005030    | PLK1   | 16   | 106  | 5.47402430625 |
| NM_005030    | PLK1   | 1219 | 1370 | 8.17446403194 |
| NM_005030    | PLK1   | 993  | 1137 | 5.4740243138  |
| NM_005030    | PLK1   | 364  | 731  | 8.86634173658 |
| NM_005030    | PLK1   | 2094 | 2167 | 5.4740243138  |
| NM_005030    | PLK1   | 1768 | 1913 | 6.05898681452 |
| NM_014905    | GLS    | 2107 | 2176 | 6.96433952018 |
| NM_014905    | GLS    | 466  | 532  | 6.22737392601 |
| NM_014905    | GLS    | 1929 | 2029 | 7.22737392601 |
| NM_014905    | GLS    | 4362 | 4423 | 6.22737392601 |
| NM_014905    | GLS    | 2188 | 2283 | 6.22737392579 |
| NM_014905    | GLS    | 4312 | 4359 | 4.64241118937 |

|           |         |      |      |               |
|-----------|---------|------|------|---------------|
| NM_014905 | GLS     | 0    | 49   | 5.63839382512 |
| NM_014905 | GLS     | 2305 | 2346 | 5.64240469424 |
| NM_014905 | GLS     | 4116 | 4181 | 6.64241142529 |
| NM_014905 | GLS     | 1476 | 1908 | 10.8123364267 |
| NM_014905 | GLS     | 321  | 351  | 5.63839382512 |
| NM_014905 | GLS     | 2530 | 2640 | 5.64241142529 |
| NM_014905 | GLS     | 2775 | 2863 | 6.22737392579 |
| NM_014905 | GLS     | 570  | 732  | 7.64241142529 |
| NM_014905 | GLS     | 736  | 940  | 9.34285114343 |
| NM_014905 | GLS     | 4568 | 4689 | 6.96433952018 |
| NM_014905 | GLS     | 1009 | 1471 | 10.4497663474 |
| NM_014905 | GLS     | 107  | 309  | 6.96433952018 |
| NM_005035 | POLRMT  | 1338 | 1442 | 6.51616073823 |
| NM_005035 | POLRMT  | 2421 | 2507 | 8.10112323895 |
| NM_005035 | POLRMT  | 318  | 358  | 7.51214313806 |
| NM_005035 | POLRMT  | 1765 | 1806 | 6.43202152885 |
| NM_005035 | POLRMT  | 2817 | 2937 | 9.10112323895 |
| NM_005035 | POLRMT  | 3419 | 3468 | 8.1011165079  |
| NM_005035 | POLRMT  | 1452 | 1507 | 6.51616050231 |
| NM_005035 | POLRMT  | 3480 | 3541 | 8.83808883312 |
| NM_005035 | POLRMT  | 560  | 601  | 6.43202152885 |
| NM_005035 | POLRMT  | 2141 | 2215 | 7.51598698791 |
| NM_005035 | POLRMT  | 2711 | 2804 | 6.51616073823 |
| NM_005035 | POLRMT  | 260  | 313  | 6.51616073823 |
| NM_005035 | POLRMT  | 3282 | 3371 | 6.51615400718 |
| NM_005035 | POLRMT  | 3583 | 3645 | 8.51616073823 |
| NM_005035 | POLRMT  | 1998 | 2046 | 6.51598698791 |
| NM_005035 | POLRMT  | 899  | 948  | 7.51214313806 |
| NM_005035 | POLRMT  | 641  | 678  | 7.43202152885 |
| NM_005035 | POLRMT  | 407  | 526  | 7.51616073823 |
| NM_005035 | POLRMT  | 960  | 1111 | 8.51616073823 |
| NM_005035 | POLRMT  | 1166 | 1245 | 7.51616073823 |
| NM_005035 | POLRMT  | 1844 | 1947 | 7.51616073823 |
| NM_005034 | POLR2K  | 192  | 463  | 7.50114005781 |
| NM_005034 | POLR2K  | 115  | 178  | 3.91617732117 |
| NM_005037 | PPARG   | 278  | 318  | 5.38068012792 |
| NM_005036 | PPARA   | 1699 | 1746 | 5.71476161903 |
| NM_005036 | PPARA   | 5738 | 5820 | 5.71476161903 |
| NM_017847 | C1orf27 | 1442 | 1494 | 6.12191263447 |
| NM_017847 | C1orf27 | 2841 | 2886 | 6.12173888415 |
| NM_017847 | C1orf27 | 1139 | 1228 | 9.82235235261 |
| NM_017847 | C1orf27 | 1872 | 1977 | 7.12191263447 |
| NM_017847 | C1orf27 | 1228 | 1417 | 9.58134425311 |
| NM_017847 | C1orf27 | 961  | 1088 | 8.44384072936 |
| NM_017847 | C1orf27 | 791  | 953  | 10.0288032301 |
| NM_017847 | C1orf27 | 1593 | 1657 | 6.12191263446 |
| NM_017847 | C1orf27 | 2472 | 2600 | 7.70687513519 |
| NM_017847 | C1orf27 | 2612 | 2750 | 8.70687513519 |
| NM_017847 | C1orf27 | 3522 | 3619 | 6.12191263425 |
| NM_017847 | C1orf27 | 479  | 720  | 10.2918376359 |

|              |         |      |      |               |
|--------------|---------|------|------|---------------|
| NM_017847    | C1orf27 | 2398 | 2464 | 6.12191263446 |
| NM_017847    | C1orf27 | 2927 | 3124 | 7.12191263447 |
| NM_017847    | C1orf27 | 220  | 470  | 9.70687513519 |
| NM_017845    | COMMD8  | 624  | 690  | 9.88440879159 |
| NM_017841    | SDHAF2  | 646  | 700  | 7.27229188209 |
| NM_017840    | MRPL16  | 193  | 254  | 4.34403440698 |
| NM_017840    | MRPL16  | 470  | 562  | 4.34787825684 |
| NM_017840    | MRPL16  | 952  | 1144 | 4.34805200715 |
| NM_001862    | COX5B   | 167  | 235  | 4.19247581944 |
| NM_001862    | COX5B   | 408  | 467  | 4.19247581944 |
| NM_001862    | COX5B   | 257  | 373  | 4.77743832016 |
| NM_001863    | COX6B1  | 101  | 540  | 9.32650333534 |
| NM_001861    | COX4I1  | 278  | 342  | 3.11541666245 |
| NM_001861    | COX4I1  | 743  | 781  | 1.79348183651 |
| NM_001861    | COX4I1  | 557  | 593  | 1.79348183651 |
| NM_001861    | COX4I1  | 348  | 536  | 4.2529201862  |
| NM_001861    | COX4I1  | 604  | 741  | 3.60084348962 |
| NM_001861    | COX4I1  | 71   | 274  | 3.96341356901 |
| NM_001867    | COX7C   | 307  | 418  | 4.53235350107 |
| NM_001867    | COX7C   | 142  | 305  | 6.7953879069  |
| NM_001867    | COX7C   | 8    | 135  | 5.66985702481 |
| NM_001865    | COX7A2  | 475  | 535  | 4.76625477408 |
| NM_001865    | COX7A2  | 535  | 580  | 3.3512172748  |
| NM_001865    | COX7A2  | 378  | 441  | 4.57360969614 |
| NM_001865    | COX7A2  | 141  | 357  | 5.93617977553 |
| NM_004740    | TIAF1   | 743  | 789  | 8.07995563111 |
| NM_004740    | TIAF1   | 1636 | 1746 | 9.07996235462 |
| NM_004740    | TIAF1   | 2011 | 2090 | 10.0799623622 |
| NM_004740    | TIAF1   | 1377 | 1425 | 8.07978861185 |
| NM_004740    | TIAF1   | 1747 | 1814 | 9.07996236217 |
| NM_004740    | TIAF1   | 1039 | 1120 | 8.07996236216 |
| NM_001001550 | GRB10   | 1032 | 1085 | 8.11471904017 |
| NM_001001550 | GRB10   | 272  | 325  | 9.7798031501  |
| NM_001001550 | GRB10   | 3802 | 3917 | 8.19885824933 |
| NM_001001550 | GRB10   | 2915 | 3044 | 9.19885824955 |
| NM_001517    | GTF2H4  | 15   | 77   | 7.68123923536 |
| NM_001517    | GTF2H4  | 929  | 993  | 7.68140625462 |
| NM_001114185 | MVK     | 475  | 523  | 8.67331804633 |
| NM_001514    | GTF2B   | 113  | 157  | 4.61768082446 |
| NM_001514    | GTF2B   | 679  | 793  | 5.62169818872 |
| NM_001114182 | IRAK4   | 170  | 211  | 9.27907981778 |
| NM_001515    | GTF2H2  | 591  | 636  | 5.11843146825 |
| NM_001515    | GTF2H2  | 501  | 573  | 4.20257067008 |
| NM_001515    | GTF2H2  | 1032 | 1111 | 5.11843146825 |
| NM_001515    | GTF2H2  | 390  | 487  | 5.78753317835 |
| NM_001515    | GTF2H2  | 200  | 260  | 5.20257044171 |
| NM_001515    | GTF2H2  | 1286 | 1365 | 6.20257067763 |
| NM_030877    | CTNNB1  | 164  | 225  | 3.71034715627 |
| NM_030877    | CTNNB1  | 889  | 960  | 5.29146580713 |
| NM_030877    | CTNNB1  | 1103 | 1253 | 6.71052090659 |



|           |         |      |      |               |
|-----------|---------|------|------|---------------|
| NM_024068 | OBFC2B  | 1168 | 1222 | 5.56170725876 |
| NM_024068 | OBFC2B  | 124  | 257  | 8.56572485894 |
| NM_024068 | OBFC2B  | 358  | 442  | 7.56170725876 |
| NM_024068 | OBFC2B  | 533  | 598  | 6.56571812788 |
| NM_182679 | GPATCH4 | 343  | 407  | 6.30863500517 |
| NM_182679 | GPATCH4 | 271  | 306  | 5.22851339596 |
| NM_182678 | UBE2E3  | 1082 | 1129 | 6.15487179075 |
| NM_182678 | UBE2E3  | 264  | 354  | 4.56990255898 |
| NM_182678 | UBE2E3  | 357  | 439  | 6.15487155483 |
| NM_182678 | UBE2E3  | 700  | 838  | 7.73983429147 |
| NM_182678 | UBE2E3  | 915  | 999  | 7.73983429147 |
| NM_182678 | UBE2E3  | 1003 | 1054 | 4.56589168986 |
| NM_182678 | UBE2E3  | 498  | 676  | 7.37726421209 |
| NM_182678 | UBE2E3  | 1136 | 1211 | 6.89183738492 |
| NM_004638 | PRRC2A  | 5556 | 5632 | 7.92687668622 |
| NM_004638 | PRRC2A  | 5079 | 5148 | 6.92687668622 |
| NM_004638 | PRRC2A  | 1740 | 1792 | 5.34190745445 |
| NM_004638 | PRRC2A  | 5168 | 5261 | 7.66384228039 |
| NM_004638 | PRRC2A  | 515  | 583  | 6.92687668622 |
| NM_004638 | PRRC2A  | 6241 | 6395 | 8.3419141855  |
| NM_004638 | PRRC2A  | 5482 | 5540 | 5.34191394958 |
| NM_004638 | PRRC2A  | 5013 | 5074 | 7.926876686   |
| NM_004638 | PRRC2A  | 2928 | 2977 | 5.34191394958 |
| NM_004638 | PRRC2A  | 1057 | 1094 | 5.25777497612 |
| NM_004638 | PRRC2A  | 5646 | 5760 | 8.51183918695 |
| NM_004638 | PRRC2A  | 4176 | 4239 | 7.3419141855  |
| NM_004638 | PRRC2A  | 4644 | 4780 | 6.3419141855  |
| NM_004638 | PRRC2A  | 5290 | 5411 | 8.14926910756 |
| NM_004638 | PRRC2A  | 2397 | 2634 | 9.58984169895 |
| NM_004638 | PRRC2A  | 1831 | 1950 | 7.3419141855  |
| NM_004638 | PRRC2A  | 3961 | 4109 | 6.3419141855  |
| NM_004638 | PRRC2A  | 5994 | 6187 | 8.3419141855  |
| NM_004638 | PRRC2A  | 714  | 892  | 8.66384228039 |
| NM_004638 | PRRC2A  | 3524 | 3616 | 5.34190745445 |
| NM_004638 | PRRC2A  | 1164 | 1348 | 9.14926910756 |
| NM_004638 | PRRC2A  | 3853 | 3946 | 5.34191418528 |
| NM_004638 | PRRC2A  | 391  | 505  | 7.66384228039 |
| NM_004638 | PRRC2A  | 897  | 1006 | 6.92687668622 |
| NM_004638 | PRRC2A  | 4305 | 4499 | 8.14926910756 |
| NM_004638 | PRRC2A  | 1565 | 1709 | 6.3419141855  |
| NM_004638 | PRRC2A  | 2635 | 2750 | 7.92687668622 |
| NM_004638 | PRRC2A  | 5772 | 5992 | 8.3419141855  |
| NM_004638 | PRRC2A  | 164  | 319  | 8.14926910756 |
| NM_004638 | PRRC2A  | 4854 | 4998 | 6.92687668622 |
| NM_004638 | PRRC2A  | 6413 | 6628 | 8.14926910756 |
| NM_004630 | SF1     | 463  | 558  | 4.91266343874 |
| NM_004630 | SF1     | 2779 | 2867 | 4.91266343874 |
| NM_004630 | SF1     | 146  | 209  | 2.91266320283 |
| NM_004630 | SF1     | 1919 | 1952 | 2.82852422936 |
| NM_004630 | SF1     | 887  | 960  | 4.91266343874 |

|              |       |      |      |               |
|--------------|-------|------|------|---------------|
| NM_004630    | SF1   | 788  | 848  | 4.49762593947 |
| NM_004630    | SF1   | 2985 | 3085 | 4.49762593947 |
| NM_004630    | SF1   | 558  | 674  | 6.37209505738 |
| NM_004630    | SF1   | 1077 | 1265 | 6.49762593947 |
| NM_004630    | SF1   | 1784 | 1866 | 4.91266343874 |
| NM_004630    | SF1   | 2600 | 2653 | 2.91265670769 |
| NM_004630    | SF1   | 1290 | 1474 | 6.37209505738 |
| NM_004630    | SF1   | 1477 | 1585 | 5.23459153363 |
| NM_004630    | SF1   | 2874 | 2983 | 6.23459153363 |
| NM_004630    | SF1   | 971  | 1056 | 2.91266343874 |
| NM_004630    | SF1   | 3414 | 3563 | 7.30498086152 |
| NM_004637    | RAB7A | 1347 | 1437 | 4.44313217288 |
| NM_004637    | RAB7A | 1011 | 1092 | 3.44313217288 |
| NM_004637    | RAB7A | 65   | 197  | 5.0280946736  |
| NM_004637    | RAB7A | 515  | 547  | 1.8581629411  |
| NM_004637    | RAB7A | 1913 | 1957 | 3.44312544182 |
| NM_004637    | RAB7A | 2044 | 2131 | 4.18009776704 |
| NM_004637    | RAB7A | 206  | 318  | 5.76506026776 |
| NM_004637    | RAB7A | 888  | 986  | 4.18009776704 |
| NM_004637    | RAB7A | 1129 | 1290 | 5.76506026776 |
| NM_004637    | RAB7A | 1516 | 1706 | 4.66552459421 |
| NM_004637    | RAB7A | 660  | 846  | 5.18009776704 |
| NM_004637    | RAB7A | 547  | 645  | 4.44313217288 |
| NM_004637    | RAB7A | 338  | 515  | 6.18009776704 |
| NM_001001556 | GALK2 | 1650 | 1691 | 7.27837475185 |
| NM_001001556 | GALK2 | 362  | 410  | 7.28238562097 |
| NM_001001556 | GALK2 | 1087 | 1152 | 7.27837475185 |
| NM_001001556 | GALK2 | 651  | 726  | 8.2823921161  |
| NM_001001556 | GALK2 | 811  | 909  | 8.2823921161  |
| NM_004327    | BCR   | 2928 | 2976 | 7.16116185561 |
| NM_004327    | BCR   | 6473 | 6532 | 8.48710755067 |
| NM_004327    | BCR   | 4425 | 4534 | 7.7501419565  |
| NM_004327    | BCR   | 1307 | 1397 | 7.16517945556 |
| NM_004327    | BCR   | 3908 | 3964 | 8.16517945556 |
| NM_004327    | BCR   | 2763 | 2825 | 8.75014195651 |
| NM_004327    | BCR   | 6285 | 6340 | 6.16517921987 |
| NM_004327    | BCR   | 2523 | 2563 | 7.16116185561 |
| NM_004327    | BCR   | 6227 | 6268 | 6.0810402464  |
| NM_004327    | BCR   | 6127 | 6188 | 7.16517921987 |
| NM_004327    | BCR   | 2475 | 2514 | 6.16116185561 |
| NM_004327    | BCR   | 2389 | 2437 | 6.16517272473 |
| NM_004327    | BCR   | 2440 | 2471 | 7.16500570547 |
| NM_004327    | BCR   | 1864 | 1923 | 7.16517945579 |
| NM_004327    | BCR   | 6341 | 6408 | 6.16517272473 |
| NM_004327    | BCR   | 2221 | 2288 | 7.75014195651 |
| NM_004327    | BCR   | 3435 | 3575 | 7.75014195651 |
| NM_004327    | BCR   | 2089 | 2161 | 7.7501419565  |
| NM_004327    | BCR   | 4788 | 4848 | 6.16517921987 |
| NM_004327    | BCR   | 5142 | 5238 | 6.16517272473 |
| NM_004327    | BCR   | 2567 | 2658 | 7.75014195651 |

|           |        |      |      |               |
|-----------|--------|------|------|---------------|
| NM_004327 | BCR    | 3210 | 3293 | 8.75014195651 |
| NM_004327 | BCR    | 751  | 813  | 6.16500570547 |
| NM_004327 | BCR    | 1553 | 1621 | 7.7501419565  |
| NM_004327 | BCR    | 2000 | 2089 | 7.16517945579 |
| NM_004327 | BCR    | 3319 | 3355 | 7.0810402464  |
| NM_004324 | BAX    | 424  | 554  | 6.74390861518 |
| NM_004324 | BAX    | 109  | 155  | 3.65976940579 |
| NM_004324 | BAX    | 665  | 891  | 7.99183612862 |
| NM_004324 | BAX    | 192  | 420  | 7.83137145643 |
| NM_025250 | TTYH3  | 4268 | 4311 | 5.96318209114 |
| NM_025250 | TTYH3  | 2650 | 2724 | 4.96318209136 |
| NM_025250 | TTYH3  | 2423 | 2481 | 6.54814458453 |
| NM_025250 | TTYH3  | 3032 | 3167 | 8.54814459208 |
| NM_025250 | TTYH3  | 684  | 735  | 6.96318209136 |
| NM_025250 | TTYH3  | 1787 | 1860 | 5.96318209136 |
| NM_025250 | TTYH3  | 469  | 522  | 4.96318209135 |
| NM_025250 | TTYH3  | 529  | 571  | 5.96300834104 |
| NM_025250 | TTYH3  | 3514 | 3580 | 4.96318209114 |
| NM_025250 | TTYH3  | 4212 | 4257 | 5.96318209136 |
| NM_025250 | TTYH3  | 2934 | 3022 | 7.54814459208 |
| NM_025250 | TTYH3  | 736  | 874  | 8.87007268697 |
| NM_025250 | TTYH3  | 2363 | 2423 | 4.95916449118 |
| NM_025250 | TTYH3  | 2523 | 2620 | 8.28511018624 |
| NM_025250 | TTYH3  | 1561 | 1672 | 7.28511018624 |
| NM_025250 | TTYH3  | 3899 | 4045 | 9.42261370999 |
| NM_025250 | TTYH3  | 3745 | 3898 | 9.1331070928  |
| NM_025250 | TTYH3  | 582  | 656  | 6.54814459208 |
| NM_025250 | TTYH3  | 1889 | 2306 | 9.35549951414 |
| NM_025250 | TTYH3  | 3286 | 3455 | 8.87007268697 |
| NM_025250 | TTYH3  | 187  | 462  | 9.6636218095  |
| NM_025250 | TTYH3  | 2734 | 2893 | 5.96318209136 |
| NM_025250 | TTYH3  | 4401 | 4800 | 11.0075762107 |
| NM_025250 | TTYH3  | 897  | 1483 | 10.8939194289 |
| NM_004328 | BCS1L  | 657  | 772  | 7.0323424817  |
| NM_004328 | BCS1L  | 1171 | 1230 | 6.02832488153 |
| NM_004328 | BCS1L  | 1339 | 1409 | 6.03234248148 |
| NM_004329 | BMPR1A | 1186 | 1241 | 7.72584529754 |
| NM_004329 | BMPR1A | 1982 | 2031 | 7.31080803396 |
| NM_004329 | BMPR1A | 1486 | 1540 | 6.72584553346 |
| NM_022915 | MRPL44 | 647  | 702  | 4.66261196623 |
| NM_022915 | MRPL44 | 562  | 616  | 5.98454679217 |
| NM_022915 | MRPL44 | 880  | 938  | 5.24757446695 |
| NM_022915 | MRPL44 | 377  | 526  | 5.247581198   |
| NM_022915 | MRPL44 | 1288 | 1357 | 3.66261869728 |
| NM_022915 | MRPL44 | 240  | 346  | 5.66261869728 |
| NM_022915 | MRPL44 | 705  | 839  | 5.98454679217 |
| NM_022917 | NOL6   | 1464 | 1507 | 7.98329605491 |
| NM_022917 | NOL6   | 1515 | 1548 | 7.98329605491 |
| NM_022917 | NOL6   | 3054 | 3198 | 10.0674352643 |
| NM_022917 | NOL6   | 3518 | 3589 | 9.06742853324 |

|              |          |      |      |               |               |
|--------------|----------|------|------|---------------|---------------|
| NM_022916    | VPS33A   | 660  | 757  | 7.54477639559 |               |
| NM_022916    | VPS33A   | 1331 | 1433 | 7.96383149503 |               |
| NM_022916    | VPS33A   | 782  | 884  | 7.96382476398 |               |
| NM_022916    | VPS33A   | 414  | 499  | 6.96383125912 |               |
| NM_022913    | GPBP1    | 2880 | 2923 | 4.84988654635 |               |
| NM_022913    | GPBP1    | 2627 | 2660 | 5.43869289693 |               |
| NM_022913    | GPBP1    | 2949 | 2995 | 3.85373039621 |               |
| NM_022913    | GPBP1    | 1317 | 1445 | 6.43886664725 |               |
| NM_022913    | GPBP1    | 2523 | 2627 | 5.43886664725 |               |
| NM_022913    | GPBP1    | 835  | 989  | 6.17583224141 |               |
| NM_022913    | GPBP1    | 477  | 656  | 5.85390414653 |               |
| NM_022913    | GPBP1    | 2803 | 2868 | 5.43885991619 |               |
| NM_001199346 | C18orf32 |      | 91   | 156           | 9.03920158334 |
| NM_001199346 | C18orf32 |      | 519  | 570           | 8.03919485251 |
| NM_001199346 | C18orf32 |      | 347  | 412           | 8.62399033396 |
| NM_001199346 | C18orf32 |      | 235  | 341           | 8.03920158356 |
| NM_020713    | ZNF512B  | 3376 | 3408 | 6.39777861497 |               |
| NM_022918    | TMEM135  | 1573 | 1624 | 7.06341766411 |               |
| NM_022918    | TMEM135  | 1018 | 1090 | 7.65239776478 |               |
| NM_022918    | TMEM135  | 857  | 895  | 7.65239103395 |               |
| NM_022918    | TMEM135  | 3084 | 3132 | 7.06341766411 |               |
| NM_022918    | TMEM135  | 5731 | 5767 | 6.06743526406 |               |
| NM_022918    | TMEM135  | 468  | 527  | 8.06743525674 |               |
| NM_022918    | TMEM135  | 315  | 368  | 8.06743502837 |               |
| NM_022918    | TMEM135  | 1148 | 1226 | 7.65239775746 |               |
| NM_016433    | GLTP     | 2096 | 2140 | 5.85394750709 |               |
| NM_016433    | GLTP     | 2016 | 2056 | 7.52287546687 |               |
| NM_001146333 | SUMF2    | 939  | 987  | 7.87002007285 |               |
| NM_001146333 | SUMF2    | 1415 | 1486 | 7.87019382317 |               |
| NM_001146333 | SUMF2    | 1034 | 1211 | 9.67754874522 |               |
| NM_001146333 | SUMF2    | 1214 | 1371 | 10.8701938232 |               |
| NM_001146333 | SUMF2    | 1642 | 1740 | 8.87019382317 |               |
| NM_001146333 | SUMF2    | 117  | 423  | 12.3296254418 |               |
| NM_001146333 | SUMF2    | 1751 | 1868 | 6.87019382317 |               |
| NM_001146333 | SUMF2    | 511  | 796  | 11.1921219181 |               |
| NM_016467    | ORMDL1   | 337  | 410  | 9.42566311237 |               |
| NM_016467    | ORMDL1   | 468  | 516  | 9.42548936228 |               |
| NM_016467    | ORMDL1   | 1049 | 1111 | 9.4256631126  |               |
| NM_016467    | ORMDL1   | 2025 | 2086 | 7.42164551242 |               |
| NM_016467    | ORMDL1   | 177  | 255  | 9.74759120748 |               |
| NM_016467    | ORMDL1   | 628  | 708  | 10.0106256133 |               |
| NM_016464    | TMEM138  | 849  | 888  | 10.6252721615 |               |
| NM_016464    | TMEM138  | 1262 | 1357 | 11.2943738716 |               |
| NM_016464    | TMEM138  | 500  | 568  | 11.2903562714 |               |
| NM_016464    | TMEM138  | 731  | 780  | 10.7092376206 |               |
| NM_016464    | TMEM138  | 613  | 720  | 12.0313394658 |               |
| NM_016462    | TMEM14C  | 1063 | 1137 | 5.8966194988  |               |
| NM_016462    | TMEM14C  | 413  | 466  | 4.31165027457 |               |
| NM_016462    | TMEM14C  | 879  | 1028 | 8.01209672377 |               |
| NM_016462    | TMEM14C  | 473  | 643  | 7.11901192768 |               |

|              |         |      |      |               |
|--------------|---------|------|------|---------------|
| NM_016463    | CXXC5   | 1319 | 1379 | 7.11240101957 |
| NM_016463    | CXXC5   | 1124 | 1208 | 7.69753727039 |
| NM_003247    | THBS2   | 2512 | 2559 | 14.4661043964 |
| NM_015997    | RRNAD1  | 1890 | 1937 | 8.57937174748 |
| NM_015997    | RRNAD1  | 1939 | 2010 | 6.99440924698 |
| NM_015997    | RRNAD1  | 467  | 636  | 7.99440924698 |
| NM_016468    | COX16   | 428  | 493  | 7.93067712677 |
| NM_016468    | COX16   | 46   | 144  | 8.93067712678 |
| NM_016468    | COX16   | 501  | 549  | 6.93067712677 |
| NM_016468    | COX16   | 158  | 428  | 10.018139968  |
| NM_015994    | ATP6V1D | 1206 | 1263 | 7.52929583606 |
| NM_015994    | ATP6V1D | 610  | 705  | 8.52929607198 |
| NM_015994    | ATP6V1D | 1088 | 1166 | 8.1142585727  |
| NM_015994    | ATP6V1D | 818  | 864  | 8.52929607198 |
| NM_015994    | ATP6V1D | 713  | 787  | 9.1142585727  |
| NM_015994    | ATP6V1D | 409  | 445  | 8.11408482238 |
| NM_015994    | ATP6V1D | 869  | 900  | 6.52928934093 |
| NM_015994    | ATP6V1D | 930  | 1079 | 7.52929607198 |
| NM_017599    | VEZT    | 1282 | 1336 | 6.9435501128  |
| NM_017599    | VEZT    | 133  | 209  | 7.68051571451 |
| NM_017599    | VEZT    | 1921 | 1970 | 5.27444841024 |
| NM_017599    | VEZT    | 1789 | 1833 | 5.27444841024 |
| NM_017599    | VEZT    | 856  | 922  | 6.9435501128  |
| NM_017599    | VEZT    | 1011 | 1050 | 5.27444841024 |
| NM_017599    | VEZT    | 347  | 390  | 7.35858761962 |
| NM_017599    | VEZT    | 2456 | 2559 | 6.3585873837  |
| NM_017599    | VEZT    | 2614 | 2714 | 5.35858761962 |
| NM_017599    | VEZT    | 534  | 689  | 9.16594254168 |
| NM_017599    | VEZT    | 1407 | 1481 | 6.94354338929 |
| NM_017599    | VEZT    | 1125 | 1261 | 7.35858761962 |
| NM_017599    | VEZT    | 417  | 504  | 7.35858088857 |
| NM_001173408 | OBSL1   | 1895 | 1947 | 4.26393307854 |
| NM_001173408 | OBSL1   | 787  | 839  | 5.26795067871 |
| NM_001173408 | OBSL1   | 2648 | 2701 | 4.26777692839 |
| NM_001173408 | OBSL1   | 3182 | 3256 | 5.26795067871 |
| NM_001173408 | OBSL1   | 1618 | 1708 | 6.26795067871 |
| NM_001173408 | OBSL1   | 2613 | 2645 | 5.85290644838 |
| NM_001173408 | OBSL1   | 1201 | 1295 | 5.85291317943 |
| NM_001173408 | OBSL1   | 2503 | 2606 | 6.85291317943 |
| NM_001173408 | OBSL1   | 1963 | 2095 | 5.26795067871 |
| NM_001173408 | OBSL1   | 443  | 517  | 4.26795067116 |
| NM_001173408 | OBSL1   | 3025 | 3125 | 5.26795067871 |
| NM_001173408 | OBSL1   | 2810 | 2889 | 4.26795067849 |
| NM_001173408 | OBSL1   | 3406 | 3523 | 5.85291317921 |
| NM_017590    | ZC3H7B  | 2069 | 2112 | 4.81523545365 |
| NM_017590    | ZC3H7B  | 1971 | 2025 | 6.89937466304 |
| NM_017590    | ZC3H7B  | 2351 | 2412 | 6.48031956359 |
| NM_017590    | ZC3H7B  | 813  | 878  | 5.89936793198 |
| NM_017590    | ZC3H7B  | 3807 | 3884 | 6.48433692784 |
| NM_017590    | ZC3H7B  | 388  | 455  | 5.89936793198 |

|              |              |      |      |               |               |
|--------------|--------------|------|------|---------------|---------------|
| NM_017590    | ZC3H7B       | 1780 | 1830 | 4.89937442712 |               |
| NM_017590    | ZC3H7B       | 897  | 988  | 5.89937466303 |               |
| NM_017590    | ZC3H7B       | 3042 | 3096 | 4.89535706286 |               |
| NM_017590    | ZC3H7B       | 4961 | 5030 | 4.89937466304 |               |
| NM_017592    | MED29        | 890  | 956  | 6.47781265106 |               |
| NM_017592    | MED29        | 1093 | 1194 | 6.47781265861 |               |
| NM_017592    | MED29        | 1042 | 1075 | 6.47780592756 |               |
| NM_006893    | EIF2D        | 304  | 367  | 7.19754833011 |               |
| NM_006893    | EIF2D        | 1957 | 2038 | 7.19755506116 |               |
| NM_006893    | EIF2D        | 1348 | 1409 | 6.19353746099 |               |
| NM_006893    | EIF2D        | 535  | 589  | 6.19754833011 |               |
| NM_006893    | EIF2D        | 387  | 460  | 7.19353746099 |               |
| NM_005736    | ACTR1A       | 1677 | 1732 | 8.07277745303 |               |
| NM_005736    | ACTR1A       | 1029 | 1065 | 8.48782167581 |               |
| NM_005736    | ACTR1A       | 381  | 423  | 8.07278418386 |               |
| NM_005736    | ACTR1A       | 423  | 488  | 7.4878149523  |               |
| NM_005736    | ACTR1A       | 1429 | 1505 | 7.48782168336 |               |
| NM_005736    | ACTR1A       | 2329 | 2446 | 7.48782167581 |               |
| NM_005736    | ACTR1A       | 490  | 616  | 7.48782168336 |               |
| NM_005736    | ACTR1A       | 2014 | 2073 | 8.07261043376 |               |
| NM_005736    | ACTR1A       | 1217 | 1352 | 10.0727841841 |               |
| NM_005736    | ACTR1A       | 301  | 378  | 8.48782168336 |               |
| NM_005736    | ACTR1A       | 904  | 1021 | 9.48782168336 |               |
| NM_005736    | ACTR1A       | 1081 | 1214 | 9.07278418408 |               |
| NM_005736    | ACTR1A       | 712  | 788  | 8.48782168336 |               |
| NM_005736    | ACTR1A       | 2225 | 2295 | 7.48782168314 |               |
| NM_181659    | NCOA3        | 4557 | 4608 | 6.24144671515 |               |
| NM_181659    | NCOA3        | 2821 | 2865 | 6.24161373441 |               |
| NM_181659    | NCOA3        | 4791 | 4862 | 6.24161373441 |               |
| NM_181659    | NCOA3        | 5108 | 5175 | 6.23760286529 |               |
| NM_181659    | NCOA3        | 6291 | 6342 | 5.15748125608 |               |
| NM_181659    | NCOA3        | 3358 | 3491 | 6.24162046547 |               |
| NM_181659    | NCOA3        | 4955 | 5090 | 6.82658296619 |               |
| NM_001164468 | TMED7-TICAM2 |      | 571  | 640           | 9.43926423887 |
| NM_001164468 | TMED7-TICAM2 |      | 674  | 922           | 10.9131954272 |
| NM_001164468 | TMED7-TICAM2 |      | 142  | 316           | 9.07669415949 |
| NM_001164468 | TMED7-TICAM2 |      | 411  | 571           | 9.59126733232 |
| NM_000801    | FKBP1A       | 593  | 722  | 7.38519994503 |               |
| NM_000801    | FKBP1A       | 970  | 1011 | 2.92175072622 |               |
| NM_000801    | FKBP1A       | 1237 | 1383 | 4.51073082712 |               |
| NM_000801    | FKBP1A       | 447  | 568  | 6.24769642128 |               |
| NM_000801    | FKBP1A       | 282  | 404  | 4.51073082712 |               |
| NM_000801    | FKBP1A       | 1421 | 1570 | 6.38519994503 |               |
| NM_001242598 | TMEM147      | 138  | 188  | 9.92078109064 |               |
| NM_001242598 | TMEM147      | 456  | 510  | 9.3358185897  |               |
| NM_001242598 | TMEM147      | 204  | 449  | 11.2427091855 |               |
| NM_001242598 | TMEM147      | 552  | 641  | 8.92078109064 |               |
| NM_001164463 | RGPD8        | 6131 | 6211 | 7.02035080947 |               |
| NM_001164463 | RGPD8        | 2305 | 2381 | 8.01633320952 |               |
| NM_001164463 | RGPD8        | 1351 | 1404 | 9.02017705937 |               |

|              |         |      |      |               |
|--------------|---------|------|------|---------------|
| NM_001164463 | RGPD8   | 817  | 902  | 9.02035080969 |
| NM_001164463 | RGPD8   | 2159 | 2239 | 9.02035080969 |
| NM_001164463 | RGPD8   | 1181 | 1260 | 9.34227890458 |
| NM_001164463 | RGPD8   | 648  | 725  | 9.02035080214 |
| NM_001164463 | RGPD8   | 1104 | 1175 | 8.02035080214 |
| NM_001164463 | RGPD8   | 1829 | 1870 | 6.93621160031 |
| NM_001164463 | RGPD8   | 3635 | 3802 | 8.02035080969 |
| NM_001164463 | RGPD8   | 3232 | 3318 | 8.02035080969 |
| NM_001164463 | RGPD8   | 2066 | 2151 | 7.02035080968 |
| NM_001164463 | RGPD8   | 4447 | 4578 | 8.02035080969 |
| NM_145261    | DNAJC19 | 404  | 465  | 7.56078343506 |
| NM_145266    | NUDCD2  | 396  | 440  | 4.65423177873 |
| NM_145265    | CCDC127 | 732  | 784  | 5.8047363297  |
| NM_145265    | CCDC127 | 336  | 430  | 6.38969883064 |
| NM_145265    | CCDC127 | 793  | 937  | 6.80473632992 |
| NM_148976    | PSMA1   | 1324 | 1378 | 7.23077707413 |
| NM_148976    | PSMA1   | 465  | 517  | 6.48979387979 |
| NM_148976    | PSMA1   | 379  | 422  | 6.90884224819 |
| NM_148976    | PSMA1   | 1094 | 1159 | 6.90884897924 |
| NM_148976    | PSMA1   | 565  | 711  | 9.55270516901 |
| NM_148976    | PSMA1   | 1207 | 1278 | 5.90867522892 |
| NM_148976    | PSMA1   | 744  | 1076 | 9.90884897924 |
| NM_006675    | TSPAN9  | 2704 | 2749 | 3.84453278151 |
| NM_006675    | TSPAN9  | 2278 | 2335 | 3.92849824057 |
| NM_006675    | TSPAN9  | 1970 | 2030 | 3.92465439072 |
| NM_006675    | TSPAN9  | 610  | 644  | 4.84453278151 |
| NM_006675    | TSPAN9  | 1460 | 1523 | 3.92465439072 |
| NM_006675    | TSPAN9  | 3434 | 3476 | 3.92866525984 |
| NM_006675    | TSPAN9  | 213  | 295  | 7.25060008578 |
| NM_006675    | TSPAN9  | 825  | 906  | 3.92867175497 |
| NM_006675    | TSPAN9  | 314  | 367  | 4.92849824057 |
| NM_006675    | TSPAN9  | 369  | 486  | 6.51363449161 |
| NM_006675    | TSPAN9  | 3211 | 3307 | 4.92866525984 |
| NM_031459    | SESN2   | 3137 | 3200 | 9.08405361338 |
| NM_002958    | RYK     | 252  | 354  | 8.94780786666 |
| NM_002958    | RYK     | 1653 | 1714 | 7.94780786666 |
| NM_002958    | RYK     | 918  | 963  | 7.35882776576 |
| NM_002958    | RYK     | 708  | 763  | 7.36284535839 |
| NM_002958    | RYK     | 847  | 890  | 7.9478011356  |
| NM_002958    | RYK     | 355  | 407  | 7.35882776576 |
| NM_002958    | RYK     | 2017 | 2088 | 6.36284536571 |
| NM_002958    | RYK     | 517  | 623  | 7.94780786666 |
| NM_002958    | RYK     | 445  | 489  | 7.35882776576 |
| NM_002958    | RYK     | 1520 | 1637 | 7.94780786665 |
| NM_002957    | RXRA    | 2357 | 2406 | 6.40953244765 |
| NM_002957    | RXRA    | 4083 | 4123 | 4.82858731118 |
| NM_002957    | RXRA    | 4000 | 4065 | 5.8285875471  |
| NM_002957    | RXRA    | 1201 | 1279 | 6.8285875471  |
| NM_002957    | RXRA    | 2121 | 2220 | 5.8285875471  |
| NM_002957    | RXRA    | 3775 | 3865 | 4.82858081605 |

|              |         |      |      |                |
|--------------|---------|------|------|----------------|
| NM_002957    | RXRA    | 5305 | 5408 | 6.8285875471   |
| NM_002957    | RXRA    | 2969 | 3044 | 5.82858081605  |
| NM_002957    | RXRA    | 1890 | 2030 | 6.8285875471   |
| NM_002957    | RXRA    | 633  | 731  | 5.8285875471   |
| NM_002957    | RXRA    | 1658 | 1756 | 6.41355004782  |
| NM_002957    | RXRA    | 2658 | 2715 | 4.74444833772  |
| NM_002957    | RXRA    | 135  | 202  | 6.74444833772  |
| NM_001184792 | PARD3   | 333  | 376  | 4.11733102845  |
| NM_001184792 | PARD3   | 533  | 576  | 4.19745263766  |
| NM_001184792 | PARD3   | 737  | 819  | 5.19745263766  |
| NM_001184792 | PARD3   | 1235 | 1273 | 4.20129648752  |
| NM_001184792 | PARD3   | 2050 | 2098 | 5.78241513838  |
| NM_001184792 | PARD3   | 2674 | 2740 | 6.20147000192  |
| NM_001184792 | PARD3   | 1285 | 1351 | 5.20147023783  |
| NM_001184792 | PARD3   | 445  | 529  | 6.20147023783  |
| NM_031453    | FAM107B | 1564 | 1642 | 5.30946755862  |
| NM_031453    | FAM107B | 3569 | 3619 | 5.30946732271  |
| NM_031453    | FAM107B | 1253 | 1292 | 4.22532834924  |
| NM_031453    | FAM107B | 1689 | 1723 | 4.30544995845  |
| NM_031453    | FAM107B | 2568 | 2640 | 6.30946732271  |
| NM_031453    | FAM107B | 757  | 856  | 6.30946755862  |
| NM_031453    | FAM107B | 1363 | 1430 | 5.22532834924  |
| NM_031453    | FAM107B | 3200 | 3278 | 4.22532834924  |
| NM_031453    | FAM107B | 2888 | 3052 | 6.63139565351  |
| NM_031453    | FAM107B | 2269 | 2348 | 5.89443005934  |
| NM_031453    | FAM107B | 2059 | 2150 | 6.63139565351  |
| NM_031453    | FAM107B | 3382 | 3459 | 5.30946755108  |
| NM_002953    | RPS6KA1 | 1134 | 1172 | 7.24251500752  |
| NM_002953    | RPS6KA1 | 2543 | 2600 | 8.23867115767  |
| NM_002953    | RPS6KA1 | 1429 | 1467 | 7.15854954846  |
| NM_002952    | RPS2    | 383  | 464  | 3.1782147964   |
| NM_002952    | RPS2    | 13   | 59   | 0.366842274168 |
| NM_002952    | RPS2    | 288  | 364  | 3.1782147964   |
| NM_002952    | RPS2    | 473  | 935  | 5.01471606412  |
| NM_002952    | RPS2    | 77   | 271  | 2.54078487578  |
| NM_002951    | RPN2    | 2204 | 2305 | 3.84695605392  |
| NM_002951    | RPN2    | 2448 | 2491 | 0.842938453745 |
| NM_002951    | RPN2    | 86   | 211  | 3.43191855464  |
| NM_002951    | RPN2    | 1927 | 2199 | 6.65431097598  |
| NM_002951    | RPN2    | 512  | 719  | 5.49081224369  |
| NM_002951    | RPN2    | 308  | 508  | 5.43191855464  |
| NM_002951    | RPN2    | 1504 | 1910 | 6.65431097598  |
| NM_002951    | RPN2    | 2308 | 2445 | 4.75384664953  |
| NM_002951    | RPN2    | 729  | 1490 | 7.32268948488  |
| NM_002950    | RPN1    | 2104 | 2341 | 7.0276148755   |
| NM_002950    | RPN1    | 64   | 2095 | 10.9818111859  |
| NM_024617    | ZCCHC6  | 826  | 942  | 5.55971224738  |
| NM_024612    | DHX40   | 1204 | 1248 | 5.47682003417  |
| NM_024613    | PLEKHF2 | 923  | 976  | 7.55794359526  |
| NM_001130825 | SUPT5H  | 2494 | 2553 | 4.64314842117  |



|              |        |      |      |               |
|--------------|--------|------|------|---------------|
| NM_001130825 | SUPT5H | 2801 | 2869 | 6.64314865708 |
| NM_001130825 | SUPT5H | 1020 | 1087 | 6.22811115781 |
| NM_001130825 | SUPT5H | 2004 | 2080 | 6.22811115781 |
| NM_001130825 | SUPT5H | 1096 | 1180 | 6.64314865709 |
| NM_001130825 | SUPT5H | 490  | 528  | 5.5590094477  |
| NM_001130825 | SUPT5H | 2265 | 2306 | 4.64314842117 |
| NM_001130825 | SUPT5H | 3074 | 3124 | 4.64297490677 |
| NM_001130825 | SUPT5H | 3179 | 3246 | 5.64314865709 |
| NM_001130825 | SUPT5H | 3261 | 3312 | 5.64297490677 |
| NM_001130825 | SUPT5H | 384  | 458  | 5.64314865708 |
| NM_001130825 | SUPT5H | 3482 | 3674 | 8.45050357915 |
| NM_001130825 | SUPT5H | 2093 | 2172 | 5.64314865709 |
| NM_001130825 | SUPT5H | 1218 | 1412 | 7.45050357915 |
| NM_001130825 | SUPT5H | 3320 | 3415 | 6.96507674443 |
| NM_001130825 | SUPT5H | 1741 | 1980 | 8.10258027572 |
| NM_001130825 | SUPT5H | 540  | 677  | 5.64314865709 |
| NM_001130825 | SUPT5H | 96   | 266  | 4.64314865709 |
| NM_001130825 | SUPT5H | 1419 | 1734 | 7.96507675197 |
| NM_017439    | PION   | 2777 | 2831 | 7.54622759911 |
| NM_017439    | PION   | 2495 | 2558 | 8.63019305818 |
| NM_017439    | PION   | 1981 | 2106 | 9.21532930922 |
| NM_031231    | NECAB3 | 364  | 421  | 6.48745150101 |
| NM_031231    | NECAB3 | 1309 | 1410 | 7.48762524378 |
| NM_175066    | DDX51  | 3444 | 3503 | 8.10817250232 |
| NM_175066    | DDX51  | 1716 | 1777 | 8.02805089311 |
| NM_175066    | DDX51  | 1495 | 1590 | 9.11219009495 |
| NM_178507    | OAF    | 1318 | 1417 | 8.08140082185 |
| NM_003578    | SOAT2  | 1942 | 1984 | 6.3842213439  |
| NM_003578    | SOAT2  | 251  | 329  | 7.96935735902 |
| NM_003578    | SOAT2  | 937  | 997  | 6.38439509421 |
| NM_003578    | SOAT2  | 546  | 603  | 7.96918384462 |
| NM_003578    | SOAT2  | 1788 | 1841 | 6.30025588484 |
| NM_003578    | SOAT2  | 796  | 859  | 7.38439509422 |
| NM_003578    | SOAT2  | 1679 | 1742 | 7.38439509421 |
| NM_003578    | SOAT2  | 1193 | 1326 | 9.38439509422 |
| NM_003578    | SOAT2  | 1393 | 1461 | 8.70632318156 |
| NM_178502    | DTX3   | 1528 | 1684 | 11.1271255707 |
| NM_178502    | DTX3   | 532  | 630  | 10.7120880715 |
| NM_178502    | DTX3   | 2052 | 2198 | 12.1271255707 |
| NM_006090    | CEPT1  | 1890 | 1951 | 9.00649474975 |
| NM_006090    | CEPT1  | 411  | 498  | 10.3130263805 |
| NM_006090    | CEPT1  | 973  | 1028 | 9.09063372321 |
| NM_006090    | CEPT1  | 830  | 879  | 9.50567145841 |
| NM_006090    | CEPT1  | 248  | 397  | 10.3130263805 |
| NM_006090    | CEPT1  | 1817 | 1860 | 9.08661635896 |
| NM_006090    | CEPT1  | 887  | 970  | 10.3130263805 |
| NM_006090    | CEPT1  | 1205 | 1543 | 12.412562054  |
| NM_006090    | CEPT1  | 1113 | 1159 | 8.50566472736 |
| NM_006090    | CEPT1  | 1046 | 1101 | 9.50566472736 |
| NM_006090    | CEPT1  | 1617 | 1816 | 11.0906339591 |

|           |          |      |      |               |               |
|-----------|----------|------|------|---------------|---------------|
| NM_006090 | CEPT     | 516  | 828  | 13.0292334145 |               |
| NM_078470 | COX15    | 947  | 988  | 7.89093203676 |               |
| NM_078470 | COX15    | 1000 | 1103 | 9.97507124614 |               |
| NM_078470 | COX15    | 2605 | 2690 | 7.97507101022 |               |
| NM_078470 | COX15    | 1583 | 1635 | 10.5600337466 |               |
| NM_078470 | COX15    | 4145 | 4221 | 8.97105364597 |               |
| NM_078470 | COX15    | 1861 | 1935 | 8.97507124614 |               |
| NM_078470 | COX15    | 798  | 940  | 10.7824261682 |               |
| NM_078470 | COX15    | 1461 | 1543 | 9.56003374686 |               |
| NM_078470 | COX15    | 1313 | 1420 | 10.9750712461 |               |
| NM_006094 | DLC1     | 4473 | 4551 | 5.88208001614 |               |
| NM_006094 | DLC1     | 618  | 679  | 5.88609088526 |               |
| NM_006094 | DLC1     | 4055 | 4107 | 5.885923866   |               |
| NM_006094 | DLC1     | 2405 | 2511 | 7.88609761632 |               |
| NM_006094 | DLC1     | 3503 | 3581 | 5.8860976161  |               |
| NM_006094 | DLC1     | 2263 | 2392 | 6.88609760877 |               |
| NM_178509 | STXBP4   | 773  | 821  | 8.9199517681  |               |
| NM_178509 | STXBP4   | 1285 | 1344 | 8.33498926738 |               |
| NM_178509 | STXBP4   | 1892 | 1937 | 8.25486765817 |               |
| NM_178509 | STXBP4   | 2343 | 2393 | 8.33498926738 |               |
| NM_178509 | STXBP4   | 1635 | 1715 | 8.33498926738 |               |
| NM_014738 | KIAA0195 |      | 3829 | 3878          | 5.64433197362 |
| NM_014738 | KIAA0195 |      | 4320 | 4417          | 7.22929448189 |
| NM_014738 | KIAA0195 |      | 3914 | 3967          | 5.64432525011 |
| NM_014738 | KIAA0195 |      | 2494 | 2554          | 7.22527688171 |
| NM_014738 | KIAA0195 |      | 148  | 222           | 5.64031438099 |
| NM_014738 | KIAA0195 |      | 240  | 288           | 7.22527688171 |
| NM_014738 | KIAA0195 |      | 578  | 621           | 5.64415823085 |
| NM_014738 | KIAA0195 |      | 1896 | 1963          | 6.64432525011 |
| NM_014738 | KIAA0195 |      | 766  | 860           | 5.64433198116 |
| NM_014738 | KIAA0195 |      | 3598 | 3700          | 8.45168690322 |
| NM_014738 | KIAA0195 |      | 2414 | 2483          | 6.64432525011 |
| NM_014739 | BCLAF1   | 3687 | 3756 | 5.41835756643 |               |
| NM_014739 | BCLAF1   | 5437 | 5486 | 4.83322131539 |               |
| NM_014739 | BCLAF1   | 4115 | 4160 | 4.83322131539 |               |
| NM_014739 | BCLAF1   | 5237 | 5297 | 3.83339506549 |               |
| NM_014739 | BCLAF1   | 779  | 846  | 4.83339506571 |               |
| NM_014739 | BCLAF1   | 492  | 575  | 3.83339505816 |               |
| NM_014739 | BCLAF1   | 3015 | 3063 | 3.83322131539 |               |
| NM_014739 | BCLAF1   | 2832 | 2884 | 3.83339482979 |               |
| NM_014739 | BCLAF1   | 1216 | 1272 | 3.83339505816 |               |
| NM_014739 | BCLAF1   | 1064 | 1120 | 3.83339506549 |               |
| NM_014739 | BCLAF1   | 1794 | 1833 | 3.82937746554 |               |
| NM_014739 | BCLAF1   | 968  | 1033 | 3.83339505816 |               |
| NM_014739 | BCLAF1   | 3912 | 3999 | 4.83322131539 |               |
| NM_014739 | BCLAF1   | 1723 | 1790 | 3.82937746554 |               |
| NM_014739 | BCLAF1   | 3757 | 3826 | 5.41835756643 |               |
| NM_014739 | BCLAF1   | 3259 | 3417 | 7.83339506571 |               |
| NM_014739 | BCLAF1   | 4505 | 4615 | 3.83338833466 |               |
| NM_014739 | BCLAF1   | 4965 | 5034 | 4.83339505816 |               |

|           |        |      |      |               |
|-----------|--------|------|------|---------------|
| NM_014739 | BCLAF1 | 1857 | 1930 | 5.83339506571 |
| NM_014739 | BCLAF1 | 3434 | 3533 | 5.41835756643 |
| NM_014739 | BCLAF1 | 2798 | 2832 | 3.82937746554 |
| NM_014739 | BCLAF1 | 354  | 438  | 6.41835756643 |
| NM_014739 | BCLAF1 | 2291 | 2402 | 6.1553231606  |
| NM_014739 | BCLAF1 | 3114 | 3225 | 6.41835756643 |
| NM_014739 | BCLAF1 | 582  | 773  | 6.41835756643 |
| NM_014739 | BCLAF1 | 4319 | 4442 | 6.64074998777 |
| NM_014739 | BCLAF1 | 1968 | 2035 | 5.41835756643 |
| NM_014739 | BCLAF1 | 56   | 159  | 6.41835756643 |
| NM_014739 | BCLAF1 | 186  | 274  | 6.1553231606  |
| NM_014730 | MLEC   | 63   | 104  | 6.49528329051 |
| NM_014730 | MLEC   | 406  | 490  | 7.66922589213 |
| NM_014730 | MLEC   | 2671 | 2781 | 7.08426339141 |
| NM_014730 | MLEC   | 3135 | 3194 | 4.49929415963 |
| NM_014730 | MLEC   | 727  | 810  | 7.30665581275 |
| NM_014730 | MLEC   | 6204 | 6257 | 5.49930089069 |
| NM_014730 | MLEC   | 5776 | 5824 | 5.49528329051 |
| NM_014730 | MLEC   | 1205 | 1260 | 5.49930065477 |
| NM_014730 | MLEC   | 5826 | 5884 | 7.08426339141 |
| NM_014730 | MLEC   | 4960 | 5042 | 4.49930089068 |
| NM_014730 | MLEC   | 6137 | 6195 | 5.49930088314 |
| NM_014730 | MLEC   | 142  | 218  | 5.49930089069 |
| NM_014730 | MLEC   | 2812 | 2868 | 6.08426339141 |
| NM_014730 | MLEC   | 5700 | 5750 | 4.49912714037 |
| NM_014730 | MLEC   | 5087 | 5146 | 6.08426339119 |
| NM_014730 | MLEC   | 2242 | 2290 | 4.49929415963 |
| NM_014730 | MLEC   | 354  | 402  | 5.4151616813  |
| NM_014730 | MLEC   | 1604 | 1650 | 4.4151616813  |
| NM_014730 | MLEC   | 4352 | 4440 | 6.82122898558 |
| NM_014730 | MLEC   | 2060 | 2128 | 4.49930088314 |
| NM_014730 | MLEC   | 4277 | 4331 | 5.49528329051 |
| NM_014730 | MLEC   | 5987 | 6045 | 4.49929415963 |
| NM_014730 | MLEC   | 295  | 346  | 4.49930088314 |
| NM_014730 | MLEC   | 5588 | 5667 | 4.49930065477 |
| NM_014730 | MLEC   | 1409 | 1548 | 7.30665581275 |
| NM_014730 | MLEC   | 4470 | 4534 | 4.49930065477 |
| NM_014730 | MLEC   | 562  | 703  | 8.08426339141 |
| NM_014730 | MLEC   | 2132 | 2216 | 6.0842633914  |
| NM_014730 | MLEC   | 3803 | 3858 | 5.49930088314 |
| NM_014730 | MLEC   | 2955 | 3088 | 6.08426339141 |
| NM_014730 | MLEC   | 5180 | 5240 | 5.49930088314 |
| NM_014730 | MLEC   | 927  | 1072 | 7.49930089069 |
| NM_014730 | MLEC   | 1671 | 1835 | 8.4061914863  |
| NM_014730 | MLEC   | 3981 | 4117 | 7.30665581275 |
| NM_014730 | MLEC   | 3907 | 3963 | 5.49930088314 |
| NM_014730 | MLEC   | 5250 | 5353 | 6.49930089069 |
| NM_014730 | MLEC   | 5417 | 5513 | 5.49930089068 |
| NM_014730 | MLEC   | 3484 | 3759 | 8.58676373194 |
| NM_014730 | MLEC   | 4142 | 4217 | 5.49929415963 |

|           |          |      |      |                     |
|-----------|----------|------|------|---------------------|
| NM_014730 | MLEC     | 2323 | 2496 | 7.08426339141       |
| NM_014732 | KIAA0513 |      | 760  | 833 10.5635425324   |
| NM_014733 | ZFYVE16  | 3163 | 3202 | 7.74274452348       |
| NM_014733 | ZFYVE16  | 2840 | 2898 | 6.82688372531       |
| NM_014733 | ZFYVE16  | 1621 | 1691 | 7.82687700181       |
| NM_014734 | KIAA0247 |      | 552  | 603 8.76030732139   |
| NM_014734 | KIAA0247 |      | 670  | 747 10.4294023004   |
| NM_014734 | KIAA0247 |      | 2707 | 2754 10.4292352812  |
| NM_014734 | KIAA0247 |      | 843  | 897 9.844444652323  |
| NM_014734 | KIAA0247 |      | 4247 | 4303 9.844444629486 |
| NM_014734 | KIAA0247 |      | 1280 | 1379 10.4294090315  |
| NM_014736 | KIAA0101 |      | 300  | 364 6.38008822574   |
| NM_014736 | KIAA0101 |      | 606  | 650 7.29595574741   |
| NM_014736 | KIAA0101 |      | 79   | 174 8.55001995823   |
| NM_014736 | KIAA0101 |      | 742  | 839 7.70202305168   |
| NM_014736 | KIAA0101 |      | 221  | 295 5.38009494924   |
| NM_032189 | ATP11A   | 4851 | 4913 | 6.4258970742        |
| NM_032189 | ATP11A   | 4774 | 4834 | 7.16286266838       |
| NM_032189 | ATP11A   | 3643 | 3721 | 8.16286266838       |
| NM_032189 | ATP11A   | 4645 | 4725 | 6.42589707421       |
| NM_032189 | ATP11A   | 3735 | 3845 | 5.84093457349       |
| NM_032189 | ATP11A   | 220  | 310  | 7.16286266838       |
| NM_032189 | ATP11A   | 6789 | 6870 | 4.84093457327       |
| NM_032189 | ATP11A   | 6403 | 6454 | 4.84093457349       |
| NM_032189 | ATP11A   | 4951 | 4990 | 5.84093457349       |
| NM_032189 | ATP11A   | 5448 | 5503 | 5.84093457349       |
| NM_032189 | ATP11A   | 3576 | 3627 | 4.83691697332       |
| NM_032189 | ATP11A   | 6208 | 6267 | 6.42589707399       |
| NM_032189 | ATP11A   | 5526 | 5635 | 7.84093457349       |
| NM_032189 | ATP11A   | 56   | 208  | 8.01085957493       |
| NM_032189 | ATP11A   | 5065 | 5158 | 6.84093457349       |
| NM_032189 | ATP11A   | 2039 | 2109 | 7.16286266838       |
| NM_032189 | ATP11A   | 5163 | 5234 | 6.42589707421       |
| NM_032189 | ATP11A   | 5250 | 5303 | 4.7567953641        |
| NM_032189 | ATP11A   | 353  | 611  | 9.7478251691        |
| NM_032189 | ATP11A   | 7416 | 7488 | 4.7567953641        |
| NM_032189 | ATP11A   | 2297 | 2477 | 8.54137429163       |
| NM_032189 | ATP11A   | 861  | 1059 | 9.23325199627       |
| NM_032189 | ATP11A   | 6061 | 6097 | 4.84093433757       |
| NM_032189 | ATP11A   | 5924 | 6018 | 6.84093457349       |
| NM_032189 | ATP11A   | 6715 | 6759 | 4.7567953641        |
| NM_032189 | ATP11A   | 8319 | 8437 | 7.42589707421       |
| NM_032189 | ATP11A   | 4057 | 4133 | 4.84093457349       |
| NM_032189 | ATP11A   | 6521 | 6590 | 5.84093457327       |
| NM_032189 | ATP11A   | 1830 | 2039 | 9.08886208693       |
| NM_032189 | ATP11A   | 8554 | 8716 | 7.64828949555       |
| NM_032189 | ATP11A   | 2557 | 2665 | 7.42589707421       |
| NM_032189 | ATP11A   | 2692 | 2956 | 9.84093457349       |
| NM_032189 | ATP11A   | 2131 | 2287 | 6.84093457349       |
| NM_032189 | ATP11A   | 4373 | 4455 | 6.42589707421       |

|           |         |      |      |               |
|-----------|---------|------|------|---------------|
| NM_032189 | ATP11A  | 2970 | 3401 | 10.3955234252 |
| NM_032189 | ATP11A  | 5647 | 5830 | 8.16286266838 |
| NM_032189 | ATP11A  | 628  | 859  | 8.54137429163 |
| NM_032189 | ATP11A  | 8116 | 8253 | 6.84093457349 |
| NM_032189 | ATP11A  | 3423 | 3574 | 7.42589707421 |
| NM_032189 | ATP11A  | 1064 | 1808 | 10.5688550281 |
| NM_014225 | PPP2R1A | 2396 | 2460 | 7.5043825685  |
| NM_014225 | PPP2R1A | 1756 | 1856 | 7.69702764644 |
| NM_014225 | PPP2R1A | 2144 | 2182 | 4.61288843706 |
| NM_014225 | PPP2R1A | 571  | 628  | 5.61288843706 |
| NM_014225 | PPP2R1A | 1856 | 1896 | 4.69702091539 |
| NM_014225 | PPP2R1A | 694  | 849  | 8.39746736458 |
| NM_014225 | PPP2R1A | 467  | 538  | 7.01895574133 |
| NM_014225 | PPP2R1A | 1414 | 1510 | 7.5043825685  |
| NM_014225 | PPP2R1A | 2226 | 2330 | 6.28199014716 |
| NM_014225 | PPP2R1A | 1552 | 1613 | 4.61288843706 |
| NM_014225 | PPP2R1A | 1905 | 2096 | 7.86695264789 |
| NM_014225 | PPP2R1A | 857  | 999  | 8.01895574133 |
| NM_014225 | PPP2R1A | 1618 | 1726 | 7.28199014716 |
| NM_014225 | PPP2R1A | 1006 | 1414 | 8.78449048769 |
| NM_014225 | PPP2R1A | 320  | 462  | 6.28199014716 |
| NM_014222 | NDUFA8  | 568  | 622  | 4.45206776767 |
| NM_014222 | NDUFA8  | 84   | 131  | 4.36793528934 |
| NM_014222 | NDUFA8  | 142  | 220  | 5.0370369919  |
| NM_014222 | NDUFA8  | 659  | 766  | 5.03703699945 |
| NM_014222 | NDUFA8  | 322  | 539  | 6.45207449873 |
| NM_005207 | CRKL    | 4147 | 4207 | 7.44004954465 |
| NM_005207 | CRKL    | 2675 | 2763 | 7.44004954465 |
| NM_005207 | CRKL    | 1571 | 1687 | 9.02501877642 |
| NM_005207 | CRKL    | 693  | 766  | 6.85509377498 |
| NM_005207 | CRKL    | 35   | 88   | 6.85509377498 |
| NM_005207 | CRKL    | 602  | 689  | 9.02501877642 |
| NM_005207 | CRKL    | 958  | 1015 | 5.85509376743 |
| NM_005207 | CRKL    | 874  | 948  | 9.02501877642 |
| NM_005207 | CRKL    | 2784 | 2844 | 6.85509353906 |
| NM_005207 | CRKL    | 4224 | 4272 | 7.85509377498 |
| NM_005207 | CRKL    | 4392 | 4538 | 9.02501877642 |
| NM_005207 | CRKL    | 3044 | 3128 | 6.85509377497 |
| NM_005207 | CRKL    | 5019 | 5058 | 5.85509353906 |
| NM_005207 | CRKL    | 1394 | 1488 | 9.02501877642 |
| NM_005207 | CRKL    | 1067 | 1171 | 6.85509377498 |
| NM_005207 | CRKL    | 526  | 573  | 5.85107617481 |
| NM_005207 | CRKL    | 4730 | 5015 | 9.94255661623 |
| NM_005207 | CRKL    | 4326 | 4391 | 6.85107617481 |
| NM_005207 | CRKL    | 4636 | 4706 | 7.4400562757  |
| NM_005207 | CRKL    | 1969 | 2078 | 8.17702186987 |
| NM_005207 | CRKL    | 3185 | 3317 | 7.4400562757  |
| NM_005207 | CRKL    | 1815 | 1909 | 8.17702186987 |
| NM_005207 | CRKL    | 2331 | 2455 | 7.85509377498 |
| NM_005207 | CRKL    | 316  | 390  | 5.85509376743 |

|              |          |      |      |               |               |
|--------------|----------|------|------|---------------|---------------|
| NM_005207    | CRKL     | 1715 | 1790 | 5.85107617481 |               |
| NM_005204    | MAP3K8   | 902  | 948  | 8.12461906697 |               |
| NM_005204    | MAP3K8   | 2035 | 2081 | 8.04449745776 |               |
| NM_005204    | MAP3K8   | 1076 | 1145 | 8.12846291682 |               |
| NM_032182    | FAM175B  | 931  | 983  | 6.6433741606  |               |
| NM_032182    | FAM175B  | 263  | 312  | 7.2243257922  |               |
| NM_032182    | FAM175B  | 2842 | 2896 | 5.63936329148 |               |
| NM_032182    | FAM175B  | 107  | 189  | 5.6433741606  |               |
| NM_032181    | FAM176A  | 534  | 600  | 6.67301937562 |               |
| NM_152490    | B3GALNT2 |      | 1552 | 1629          | 5.41009723472 |
| NM_152490    | B3GALNT2 |      | 1468 | 1512          | 6.40992349195 |
| NM_152490    | B3GALNT2 |      | 1199 | 1362          | 8.21745216432 |
| NM_001143775 | CTDNEP1  | 847  | 930  | 3.75915147507 |               |
| NM_001143775 | CTDNEP1  | 759  | 829  | 3.75915147485 |               |
| NM_001143775 | CTDNEP1  | 625  | 682  | 3.75897772476 |               |
| NM_001143775 | CTDNEP1  | 1481 | 1705 | 6.08107956996 |               |
| NM_001143775 | CTDNEP1  | 245  | 275  | 2.67501226569 |               |
| NM_001143775 | CTDNEP1  | 1275 | 1442 | 5.75915147507 |               |
| NM_001143775 | CTDNEP1  | 414  | 624  | 5.92907647652 |               |
| NM_001143775 | CTDNEP1  | 682  | 751  | 4.25997476641 |               |
| NM_014229    | SLC6A11  | 1855 | 1904 | 7.74293865588 |               |
| NM_014229    | SLC6A11  | 1359 | 1397 | 9.32388379235 |               |
| NM_014229    | SLC6A11  | 1543 | 1615 | 9.73892129163 |               |
| NM_014229    | SLC6A11  | 791  | 843  | 9.7429388918  |               |
| NM_014229    | SLC6A11  | 939  | 1063 | 10.7429388918 |               |
| NM_014229    | SLC6A11  | 1238 | 1315 | 9.7429388918  |               |
| NM_014229    | SLC6A11  | 1411 | 1543 | 10.3279013925 |               |
| NM_014229    | SLC6A11  | 441  | 653  | 11.3279013925 |               |
| NM_014229    | SLC6A11  | 670  | 780  | 10.0648669867 |               |
| NM_014229    | SLC6A11  | 1186 | 1234 | 7.65879968242 |               |
| NM_014229    | SLC6A11  | 193  | 429  | 11.0648669867 |               |
| NM_006402    | HBXIP    | 726  | 772  | 4.49236747025 |               |
| NM_003385    | VSNL1    | 311  | 384  | 1.22460355895 |               |
| NM_003385    | VSNL1    | 1272 | 1344 | 2.30873603728 |               |
| NM_001163788 | ROD1     | 5436 | 5490 | 8.1937392485  |               |
| NM_001163788 | ROD1     | 180  | 260  | 8.8628409586  |               |
| NM_001163788 | ROD1     | 6781 | 6843 | 7.27386085771 |               |
| NM_001163788 | ROD1     | 4550 | 4587 | 7.27787172683 |               |
| NM_001163788 | ROD1     | 889  | 944  | 7.27770470756 |               |
| NM_001163788 | ROD1     | 1710 | 1764 | 7.27386085771 |               |
| NM_001163788 | ROD1     | 6254 | 6320 | 8.85882335843 |               |
| NM_001163788 | ROD1     | 548  | 602  | 8.27787845788 |               |
| NM_001163788 | ROD1     | 5617 | 5685 | 8.27787172683 |               |
| NM_001163788 | ROD1     | 6463 | 6549 | 8.86283422755 |               |
| NM_001163788 | ROD1     | 2910 | 2995 | 7.27787845788 |               |
| NM_001163788 | ROD1     | 996  | 1051 | 7.27386085771 |               |
| NM_001163788 | ROD1     | 4636 | 4786 | 8.8628409586  |               |
| NM_001163788 | ROD1     | 1141 | 1303 | 10.0852333799 |               |
| NM_001163788 | ROD1     | 1528 | 1674 | 10.0852333799 |               |
| NM_001163788 | ROD1     | 3047 | 3178 | 8.8628409586  |               |

|              |          |      |       |                     |
|--------------|----------|------|-------|---------------------|
| NM_001163788 | ROD1     | 2459 | 2550  | 7.27787172683       |
| NM_001163788 | ROD1     | 6616 | 6773  | 9.27787845788       |
| NM_152272    | CHMP7    | 2245 | 2282  | 7.15830772533       |
| NM_152272    | CHMP7    | 2463 | 2533  | 7.15830772533       |
| NM_152272    | CHMP7    | 1883 | 1924  | 6.15830772533       |
| NM_012227    | GTPBP6   | 464  | 560   | 7.54890750866       |
| NM_002149    | HPCAL1   | 1592 | 1669  | 5.08332412924       |
| NM_053005    | MOB2     | 1056 | 1123  | 8.82347265659       |
| NM_001142470 | C6orf203 |      | 771   | 836 6.23380527862   |
| NM_001142470 | C6orf203 |      | 923   | 988 5.22978791437   |
| NM_001077365 | POMT1    | 434  | 491   | 8.9599091297        |
| NM_001077365 | POMT1    | 538  | 621   | 8.95990239886       |
| NM_001077365 | POMT1    | 681  | 738   | 8.95990912992       |
| NM_001077365 | POMT1    | 1067 | 1126  | 6.95589152974       |
| NM_001077365 | POMT1    | 2292 | 2322  | 6.87576992053       |
| NM_001077365 | POMT1    | 2122 | 2182  | 6.959908894         |
| NM_001077365 | POMT1    | 878  | 927   | 6.959908894         |
| NM_001077365 | POMT1    | 2367 | 2437  | 6.95589152974       |
| NM_001077365 | POMT1    | 936  | 1033  | 10.2818372248       |
| NM_001077365 | POMT1    | 1922 | 2093  | 9.54487163064       |
| NM_001077365 | POMT1    | 283  | 398   | 9.54487163064       |
| NM_001077365 | POMT1    | 1459 | 1552  | 6.95990912992       |
| NM_001077498 | C17orf63 |      | 2198  | 2249 8.47077556685  |
| NM_001077498 | C17orf63 |      | 2804  | 2873 8.55089717606  |
| NM_015312    | KIAA1109 |      | 6408  | 6446 6.07139113679  |
| NM_015312    | KIAA1109 |      | 14931 | 14996 7.15553033863 |
| NM_003367    | USF2     | 1334 | 1404  | 5.0731213918        |
| NM_003367    | USF2     | 697  | 771   | 4.48815889108       |
| NM_003367    | USF2     | 1473 | 1524  | 3.48414129091       |
| NM_003367    | USF2     | 1012 | 1121  | 3.48815889108       |
| NM_003367    | USF2     | 615  | 695   | 3.48815889108       |
| NM_003367    | USF2     | 779  | 921   | 6.0731213918        |
| NM_022766    | CERK     | 4267 | 4327  | 4.98959721173       |
| NM_022766    | CERK     | 2625 | 2666  | 4.9054647334        |
| NM_022766    | CERK     | 439  | 510   | 5.57054884333       |
| NM_022766    | CERK     | 1650 | 1715  | 3.98558634261       |
| NM_022767    | AEN      | 478  | 535   | 4.98988029073       |
| NM_022767    | AEN      | 1967 | 2039  | 4.98988029073       |
| NM_022762    | RMND5B   | 1183 | 1229  | 6.78265967125       |
| NM_022762    | RMND5B   | 404  | 488   | 7.78283318565       |
| NM_022762    | RMND5B   | 641  | 705   | 7.78282669051       |
| NM_022760    | FAM113A  | 645  | 721   | 7.61537654479       |
| NM_022760    | FAM113A  | 352  | 398   | 7.03024052967       |
| NM_022760    | FAM113A  | 607  | 642   | 7.53123757132       |
| NM_022760    | FAM113A  | 291  | 337   | 6.02639667981       |
| NM_022760    | FAM113A  | 1174 | 1235  | 8.03041427998       |
| NM_022760    | FAM113A  | 1266 | 1402  | 6.03041427976       |
| NM_022760    | FAM113A  | 779  | 955   | 9.03041427998       |
| NM_022760    | FAM113A  | 957  | 1086  | 8.03041427998       |
| NM_015179    | RRP12    | 486  | 549   | 8.39790540644       |

|           |         |      |      |               |
|-----------|---------|------|------|---------------|
| NM_015179 | RRP12   | 272  | 348  | 8.31377292811 |
| NM_015179 | RRP12   | 1672 | 1704 | 8.97885703804 |
| NM_015179 | RRP12   | 3047 | 3087 | 7.39389453732 |
| NM_015179 | RRP12   | 2258 | 2326 | 7.39791212994 |
| NM_015179 | RRP12   | 689  | 768  | 8.39791213727 |
| NM_015179 | RRP12   | 1561 | 1616 | 8.39791190157 |
| NM_015179 | RRP12   | 2171 | 2233 | 9.39791213749 |
| NM_015179 | RRP12   | 1192 | 1286 | 7.39791213749 |
| NM_015179 | RRP12   | 992  | 1096 | 8.98287463821 |
| NM_015179 | RRP12   | 1386 | 1447 | 7.39389453732 |
| NM_015179 | RRP12   | 1927 | 2052 | 8.39791213749 |
| NM_015179 | RRP12   | 1771 | 1837 | 8.98287463066 |
| NM_015179 | RRP12   | 2552 | 2633 | 8.39790540644 |
| NM_015178 | RH0BTB2 | 802  | 882  | 11.2858077117 |
| NM_015171 | XP06    | 28   | 95   | 6.9787309127  |
| NM_015171 | XP06    | 2131 | 2228 | 6.39376841953 |
| NM_015171 | XP06    | 556  | 596  | 6.39376841198 |
| NM_015171 | XP06    | 1494 | 1544 | 8.20112334158 |
| NM_015171 | XP06    | 3870 | 3915 | 6.97873092025 |
| NM_015171 | XP06    | 2794 | 2903 | 5.3937684193  |
| NM_015171 | XP06    | 3916 | 3978 | 6.39376818361 |
| NM_015171 | XP06    | 1994 | 2040 | 6.30962921014 |
| NM_015171 | XP06    | 4094 | 4165 | 5.38975081935 |
| NM_015171 | XP06    | 792  | 844  | 5.39376841952 |
| NM_015171 | XP06    | 3347 | 3403 | 5.38975081935 |
| NM_015171 | XP06    | 3791 | 3858 | 6.97855716993 |
| NM_015171 | XP06    | 4327 | 4405 | 6.39376841198 |
| NM_015171 | XP06    | 2045 | 2129 | 6.97873068433 |
| NM_015171 | XP06    | 3534 | 3621 | 7.97873092025 |
| NM_015171 | XP06    | 1779 | 1903 | 8.71569651441 |
| NM_015171 | XP06    | 698  | 791  | 7.97873092025 |
| NM_015171 | XP06    | 3031 | 3151 | 6.97873092025 |
| NM_015171 | XP06    | 601  | 695  | 6.97873092025 |
| NM_015171 | XP06    | 849  | 1010 | 8.39376841953 |
| NM_015171 | XP06    | 1018 | 1154 | 7.39376841953 |
| NM_015171 | XP06    | 3197 | 3239 | 5.39359466921 |
| NM_015171 | XP06    | 440  | 501  | 5.3937684193  |
| NM_015171 | XP06    | 2255 | 2423 | 8.20112334158 |
| NM_015171 | XP06    | 1257 | 1421 | 7.97873092025 |
| NM_015171 | XP06    | 4243 | 4326 | 5.39359466921 |
| NM_015173 | TBC1D1  | 3747 | 3768 | 5.70111297617 |
| NM_015173 | TBC1D1  | 1897 | 1968 | 5.70128671894 |
| NM_015173 | TBC1D1  | 2492 | 2530 | 5.70111297617 |
| NM_015173 | TBC1D1  | 4050 | 4106 | 6.69726912631 |
| NM_015173 | TBC1D1  | 1333 | 1377 | 5.70128671894 |
| NM_015173 | TBC1D1  | 2568 | 2638 | 6.69726912631 |
| NM_015173 | TBC1D1  | 2834 | 2930 | 7.2862492272  |
| NM_015172 | PRRC2C  | 2285 | 2329 | 5.03899608037 |
| NM_015172 | PRRC2C  | 6740 | 6826 | 5.12313528976 |
| NM_015172 | PRRC2C  | 8480 | 8541 | 6.12313528976 |



|           |        |       |       |               |
|-----------|--------|-------|-------|---------------|
| NM_015172 | PRRC2C | 1587  | 1674  | 5.12313528976 |
| NM_015172 | PRRC2C | 7199  | 7321  | 6.70809779048 |
| NM_015172 | PRRC2C | 6169  | 6292  | 5.12313528976 |
| NM_015172 | PRRC2C | 4186  | 4247  | 6.44506338464 |
| NM_015172 | PRRC2C | 4881  | 4943  | 6.12313528976 |
| NM_015172 | PRRC2C | 2461  | 2538  | 6.44506338464 |
| NM_015172 | PRRC2C | 6453  | 6521  | 5.70809779048 |
| NM_015172 | PRRC2C | 5323  | 5426  | 5.70809779048 |
| NM_015172 | PRRC2C | 2987  | 3123  | 5.70809779048 |
| NM_015172 | PRRC2C | 743   | 779   | 5.70408019031 |
| NM_015172 | PRRC2C | 5770  | 5841  | 6.12313528976 |
| NM_015172 | PRRC2C | 7381  | 7448  | 6.44506338464 |
| NM_015172 | PRRC2C | 1036  | 1098  | 4.11911768958 |
| NM_015172 | PRRC2C | 6587  | 6631  | 5.12296153944 |
| NM_015172 | PRRC2C | 8545  | 8604  | 5.1231285587  |
| NM_015172 | PRRC2C | 9592  | 9648  | 5.12313528953 |
| NM_015172 | PRRC2C | 8049  | 8106  | 5.70809779048 |
| NM_015172 | PRRC2C | 7810  | 7890  | 5.70809779048 |
| NM_015172 | PRRC2C | 3385  | 3446  | 5.12296153944 |
| NM_015172 | PRRC2C | 6096  | 6164  | 4.12296153944 |
| NM_015172 | PRRC2C | 1444  | 1491  | 4.03899608037 |
| NM_015172 | PRRC2C | 7904  | 8006  | 7.12313528976 |
| NM_015172 | PRRC2C | 6319  | 6439  | 6.70809779048 |
| NM_015172 | PRRC2C | 2330  | 2450  | 6.70809779048 |
| NM_015172 | PRRC2C | 943   | 983   | 5.12313528975 |
| NM_015172 | PRRC2C | 8200  | 8258  | 4.12296153944 |
| NM_015172 | PRRC2C | 4037  | 4105  | 4.12313528976 |
| NM_015172 | PRRC2C | 4364  | 4496  | 5.70809779048 |
| NM_015172 | PRRC2C | 3170  | 3302  | 6.12313528976 |
| NM_015172 | PRRC2C | 2871  | 2979  | 7.12313528976 |
| NM_015172 | PRRC2C | 152   | 330   | 7.44506338464 |
| NM_015172 | PRRC2C | 3789  | 3875  | 4.12313505384 |
| NM_015172 | PRRC2C | 9681  | 9751  | 4.12313528976 |
| NM_015172 | PRRC2C | 7621  | 7798  | 8.44506338464 |
| NM_015172 | PRRC2C | 331   | 450   | 5.70809779048 |
| NM_015172 | PRRC2C | 9068  | 9236  | 6.93049021181 |
| NM_015172 | PRRC2C | 4704  | 4820  | 6.12313528976 |
| NM_015172 | PRRC2C | 1124  | 1294  | 7.2930602912  |
| NM_015172 | PRRC2C | 9751  | 9836  | 6.70809779048 |
| NM_015172 | PRRC2C | 3567  | 3683  | 6.12313528976 |
| NM_015172 | PRRC2C | 3701  | 3770  | 5.11911768958 |
| NM_015172 | PRRC2C | 2578  | 2862  | 7.8235750079  |
| NM_015172 | PRRC2C | 4605  | 4704  | 5.12313528976 |
| NM_015172 | PRRC2C | 5167  | 5284  | 6.44506338464 |
| NM_015172 | PRRC2C | 784   | 938   | 7.2930602912  |
| NM_015172 | PRRC2C | 8613  | 8755  | 5.12313528976 |
| NM_015172 | PRRC2C | 10146 | 10338 | 6.70809779048 |
| NM_015172 | PRRC2C | 9251  | 9488  | 8.03002588537 |
| NM_015172 | PRRC2C | 9837  | 10136 | 8.21059813101 |
| NM_015175 | NBEAL2 | 1410  | 1492  | 9.01786020228 |

|              |        |      |      |               |
|--------------|--------|------|------|---------------|
| NM_015175    | NBEAL2 | 225  | 265  | 8.01786020228 |
| NM_015175    | NBEAL2 | 4806 | 4875 | 9.09798181149 |
| NM_015175    | NBEAL2 | 6120 | 6176 | 8.09798181149 |
| NM_015175    | NBEAL2 | 3007 | 3081 | 9.09798181149 |
| NM_015175    | NBEAL2 | 7849 | 7970 | 9.68696191239 |
| NM_020870    | SH3RF1 | 1001 | 1084 | 11.2716098277 |
| NM_020870    | SH3RF1 | 3815 | 3894 | 9.26759222752 |
| NM_020870    | SH3RF1 | 3063 | 3144 | 10.2716030966 |
| NM_020870    | SH3RF1 | 219  | 311  | 10.2675922275 |
| NM_019059    | TOMM7  | 12   | 54   | 1.1025897192  |
| NM_019059    | TOMM7  | 90   | 419  | 5.23204648646 |
| NM_181861    | APAF1  | 2974 | 3026 | 9.61401155753 |
| NM_181861    | APAF1  | 3219 | 3285 | 10.6101677077 |
| NM_181861    | APAF1  | 5560 | 5648 | 10.1991410775 |
| NM_181861    | APAF1  | 5054 | 5097 | 8.61016770768 |
| NM_019054    | FAM35A | 2897 | 2923 | 5.69658728971 |
| NM_019054    | FAM35A | 1315 | 1367 | 5.6164656805  |
| NM_019054    | FAM35A | 32   | 132  | 7.02253298477 |
| NM_019054    | FAM35A | 2177 | 2252 | 4.70043113957 |
| NM_019054    | FAM35A | 323  | 385  | 4.6164656805  |
| NM_019054    | FAM35A | 3212 | 3340 | 5.70060488989 |
| NM_019052    | CCHCR1 | 1643 | 1695 | 7.896932654   |
| NM_019052    | CCHCR1 | 697  | 740  | 7.89676563473 |
| NM_019052    | CCHCR1 | 163  | 246  | 7.89693914913 |
| NM_019052    | CCHCR1 | 543  | 619  | 6.89693914913 |
| NM_019053    | EXOC6  | 1910 | 1955 | 7.60989162686 |
| NM_019053    | EXOC6  | 618  | 702  | 7.02475538337 |
| NM_019050    | USP53  | 140  | 164  | 6.57398597604 |
| NM_019050    | USP53  | 3548 | 3636 | 8.56996838342 |
| NM_019051    | MRPL50 | 694  | 724  | 3.92259599537 |
| NM_019051    | MRPL50 | 77   | 126  | 4.58768010531 |
| NM_001143994 | RASSF7 | 38   | 104  | 9.7625609675  |
| NM_001174066 | FGFR1  | 1466 | 1501 | 6.39639693676 |
| NM_003364    | UPP1   | 1022 | 1086 | 8.9607706727  |
| NM_003364    | UPP1   | 869  | 914  | 9.88064906349 |
| NM_054026    | CNOT7  | 314  | 370  | 3.30333782561 |
| NM_205847    | GMPPA  | 1469 | 1521 | 6.99270715115 |
| NM_205847    | GMPPA  | 661  | 735  | 8.57766315674 |
| NM_205845    | AKR1C2 | 704  | 755  | 4.35605775796 |
| NM_205845    | AKR1C2 | 475  | 571  | 4.5487028359  |
| NM_205845    | AKR1C2 | 656  | 704  | 2.5487028359  |
| NM_205845    | AKR1C2 | 1200 | 1240 | 3.13366533662 |
| NM_205845    | AKR1C2 | 766  | 820  | 3.87063093079 |
| NM_205845    | AKR1C2 | 299  | 393  | 4.35605775796 |
| NM_205845    | AKR1C2 | 845  | 1198 | 6.63616567715 |
| NM_205845    | AKR1C2 | 1247 | 1400 | 6.00813445454 |
| NM_015425    | POLR1A | 3952 | 3995 | 6.5244167395  |
| NM_015425    | POLR1A | 3071 | 3157 | 8.52442347033 |
| NM_015425    | POLR1A | 4450 | 4522 | 7.524423463   |
| NM_015425    | POLR1A | 1981 | 2027 | 8.52442347055 |

|           |        |      |      |               |
|-----------|--------|------|------|---------------|
| NM_015425 | POLR1A | 1145 | 1248 | 8.10938597127 |
| NM_015425 | POLR1A | 2918 | 2994 | 6.524423463   |
| NM_015425 | POLR1A | 555  | 643  | 8.1053683711  |
| NM_015425 | POLR1A | 6450 | 6516 | 7.52040587038 |
| NM_015425 | POLR1A | 1576 | 1625 | 7.524423463   |
| NM_015425 | POLR1A | 2256 | 2313 | 6.44028426117 |
| NM_015425 | POLR1A | 2610 | 2652 | 6.44028426117 |
| NM_015425 | POLR1A | 434  | 552  | 8.10938597127 |
| NM_015425 | POLR1A | 325  | 410  | 8.02524676189 |
| NM_015425 | POLR1A | 4694 | 4729 | 6.52040587038 |
| NM_015425 | POLR1A | 5721 | 5768 | 7.52424972024 |
| NM_015425 | POLR1A | 4947 | 5022 | 7.52424972024 |
| NM_015425 | POLR1A | 1343 | 1534 | 8.52442347055 |
| NM_015425 | POLR1A | 646  | 822  | 9.694348472   |
| NM_015425 | POLR1A | 2320 | 2474 | 8.84635156544 |
| NM_001321 | CSRP2  | 420  | 500  | 10.376099155  |
| NM_001325 | CSTF2  | 255  | 310  | 7.28578485888 |
| NM_001325 | CSTF2  | 129  | 195  | 7.28980245905 |
| NM_001325 | CSTF2  | 582  | 660  | 8.87476495978 |
| NM_001456 | FLNA   | 6095 | 6240 | 6.86765585285 |
| NM_001456 | FLNA   | 5430 | 5491 | 5.86765585285 |
| NM_001456 | FLNA   | 328  | 389  | 4.28269335212 |
| NM_001456 | FLNA   | 1308 | 1340 | 5.28268662108 |
| NM_001456 | FLNA   | 966  | 1051 | 6.86765585285 |
| NM_001456 | FLNA   | 7812 | 7892 | 6.28269335213 |
| NM_001456 | FLNA   | 2671 | 2754 | 6.60462144702 |
| NM_001456 | FLNA   | 7183 | 7238 | 4.28269335212 |
| NM_001456 | FLNA   | 4071 | 4125 | 5.86765585285 |
| NM_001456 | FLNA   | 1764 | 1802 | 4.19855414275 |
| NM_001456 | FLNA   | 1968 | 2018 | 5.28269335213 |
| NM_001456 | FLNA   | 2344 | 2478 | 5.86765585285 |
| NM_001456 | FLNA   | 5556 | 5605 | 5.86765561693 |
| NM_001456 | FLNA   | 6686 | 6753 | 5.86765585285 |
| NM_001456 | FLNA   | 7641 | 7669 | 5.19855414275 |
| NM_001456 | FLNA   | 5723 | 5775 | 5.28269334458 |
| NM_001456 | FLNA   | 5797 | 5848 | 5.28269335212 |
| NM_001456 | FLNA   | 7359 | 7413 | 4.28251960181 |
| NM_001456 | FLNA   | 6473 | 6537 | 5.28269335213 |
| NM_001456 | FLNA   | 4663 | 4772 | 6.60462144702 |
| NM_001456 | FLNA   | 530  | 701  | 7.86765585285 |
| NM_001456 | FLNA   | 1120 | 1202 | 4.28269334458 |
| NM_001456 | FLNA   | 2025 | 2164 | 6.28269335213 |
| NM_001456 | FLNA   | 7671 | 7721 | 5.86765561693 |
| NM_001456 | FLNA   | 7516 | 7616 | 6.28269335213 |
| NM_001456 | FLNA   | 3160 | 3217 | 6.28269335213 |
| NM_001456 | FLNA   | 2556 | 2662 | 6.28269335213 |
| NM_001456 | FLNA   | 407  | 504  | 7.09004827419 |
| NM_001456 | FLNA   | 7277 | 7308 | 4.19855414275 |
| NM_001456 | FLNA   | 6755 | 6813 | 5.86765585285 |
| NM_001456 | FLNA   | 1653 | 1696 | 4.28269335212 |

|           |       |      |      |               |
|-----------|-------|------|------|---------------|
| NM_001456 | FLNA  | 5950 | 5985 | 5.28268662108 |
| NM_001456 | FLNA  | 5287 | 5403 | 7.09004827419 |
| NM_001456 | FLNA  | 805  | 906  | 5.86765585285 |
| NM_001456 | FLNA  | 4810 | 4886 | 5.28268662108 |
| NM_001456 | FLNA  | 1244 | 1281 | 4.27867575196 |
| NM_001456 | FLNA  | 2226 | 2343 | 5.28269335213 |
| NM_001456 | FLNA  | 4155 | 4315 | 7.45261835357 |
| NM_001456 | FLNA  | 4953 | 5021 | 5.28269335213 |
| NM_001456 | FLNA  | 1380 | 1569 | 6.86765585285 |
| NM_001456 | FLNA  | 915  | 960  | 4.19855414275 |
| NM_001456 | FLNA  | 6342 | 6428 | 6.60462144702 |
| NM_001456 | FLNA  | 5021 | 5086 | 5.28251960181 |
| NM_001456 | FLNA  | 2874 | 3107 | 7.09004827419 |
| NM_001456 | FLNA  | 7054 | 7167 | 4.28269335213 |
| NM_001456 | FLNA  | 1829 | 1963 | 7.09004827419 |
| NM_001456 | FLNA  | 3630 | 3887 | 7.45261835357 |
| NM_001456 | FLNA  | 4344 | 4511 | 5.28269335213 |
| NM_001456 | FLNA  | 5634 | 5703 | 4.28269311621 |
| NM_001456 | FLNA  | 3387 | 3497 | 6.60462144702 |
| NM_001456 | FLNA  | 4558 | 4622 | 5.28269335213 |
| NM_001455 | FOX03 | 2159 | 2216 | 7.65501722958 |
| NM_001455 | FOX03 | 2066 | 2133 | 9.23997973031 |
| NM_001455 | FOX03 | 1725 | 1790 | 9.24015348062 |
| NM_001455 | FOX03 | 4201 | 4279 | 8.57105177052 |
| NM_001455 | FOX03 | 1324 | 1384 | 7.65518424885 |
| NM_001455 | FOX03 | 1980 | 2026 | 8.65117337973 |
| NM_001455 | FOX03 | 2289 | 2338 | 9.23997973031 |
| NM_001455 | FOX03 | 3672 | 3714 | 7.57105177052 |
| NM_001455 | FOX03 | 2712 | 2786 | 9.6551909799  |
| NM_001455 | FOX03 | 1003 | 1047 | 7.65117337973 |
| NM_001455 | FOX03 | 1810 | 1911 | 7.6551909799  |
| NM_001455 | FOX03 | 5472 | 5552 | 7.65117337973 |
| NM_001455 | FOX03 | 1466 | 1521 | 8.65518424885 |
| NM_001455 | FOX03 | 1651 | 1705 | 7.57105177052 |
| NM_004134 | HSPA9 | 2463 | 2556 | 4.44180152972 |
| NM_004134 | HSPA9 | 1992 | 2156 | 4.73130814692 |
| NM_004134 | HSPA9 | 225  | 336  | 4.27187652828 |
| NM_004134 | HSPA9 | 2874 | 2927 | 1.26785892811 |
| NM_004134 | HSPA9 | 1709 | 1979 | 5.79543848434 |
| NM_004134 | HSPA9 | 2944 | 3023 | 4.07923145034 |
| NM_004134 | HSPA9 | 2239 | 2460 | 4.856839029   |
| NM_004134 | HSPA9 | 389  | 453  | 2.85683902145 |
| NM_004134 | HSPA9 | 884  | 1688 | 7.84173213661 |
| NM_004134 | HSPA9 | 461  | 868  | 6.12985752341 |
| NM_004134 | HSPA9 | 2556 | 2654 | 2.27187652828 |
| NM_015131 | WDR43 | 1479 | 1534 | 3.96329191931 |
| NM_015131 | WDR43 | 821  | 855  | 3.95927455505 |
| NM_001458 | FLNC  | 4917 | 4963 | 13.0939404531 |
| NM_001458 | FLNC  | 4173 | 4216 | 13.0939404531 |
| NM_001458 | FLNC  | 748  | 818  | 13.0979580457 |

|           |         |      |      |               |
|-----------|---------|------|------|---------------|
| NM_001458 | FLNC    | 913  | 971  | 13.0979580532 |
| NM_001458 | FLNC    | 1601 | 1655 | 13.0138188439 |
| NM_001458 | FLNC    | 2627 | 2672 | 13.0939404531 |
| NM_001458 | FLNC    | 4056 | 4103 | 14.6829138229 |
| NM_001458 | FLNC    | 482  | 526  | 14.682920554  |
| NM_001458 | FLNC    | 4016 | 4046 | 13.0977843029 |
| NM_001458 | FLNC    | 7400 | 7458 | 14.0979580457 |
| NM_001458 | FLNC    | 6643 | 6691 | 13.0979578173 |
| NM_001458 | FLNC    | 2129 | 2191 | 13.0979580532 |
| NM_001458 | FLNC    | 4494 | 4544 | 13.0939404531 |
| NM_001458 | FLNC    | 3355 | 3416 | 14.0979580457 |
| NM_001458 | FLNC    | 2033 | 2124 | 13.0979580532 |
| NM_001458 | FLNC    | 6441 | 6491 | 14.0979513222 |
| NM_001458 | FLNC    | 543  | 640  | 13.0979580532 |
| NM_001458 | FLNC    | 7492 | 7591 | 13.0979580457 |
| NM_001458 | FLNC    | 5915 | 5992 | 15.0979580532 |
| NM_001458 | FLNC    | 3713 | 3820 | 13.0979580457 |
| NM_001458 | FLNC    | 6907 | 7042 | 14.0979580532 |
| NM_001458 | FLNC    | 6090 | 6144 | 14.6827468037 |
| NM_001458 | FLNC    | 5266 | 5341 | 14.0979580532 |
| NM_001458 | FLNC    | 1251 | 1318 | 13.0979580532 |
| NM_001458 | FLNC    | 4313 | 4349 | 13.0939404531 |
| NM_001458 | FLNC    | 8802 | 8866 | 13.0977843029 |
| NM_007114 | TMF1    | 2007 | 2032 | 5.99044507611 |
| NM_007114 | TMF1    | 5981 | 6024 | 4.40146497522 |
| NM_014051 | TMEM14A | 66   | 113  | 9.86517218356 |
| NM_014051 | TMEM14A | 423  | 490  | 10.4501346845 |
| NM_014051 | TMEM14A | 148  | 319  | 11.952635025  |
| NM_000320 | QDPR    | 709  | 753  | 2.65766806546 |
| NM_000320 | QDPR    | 1369 | 1466 | 3.66168566564 |
| NM_000320 | QDPR    | 762  | 920  | 4.98361376052 |
| NM_000320 | QDPR    | 1171 | 1219 | 3.66168566541 |
| NM_000320 | QDPR    | 333  | 414  | 5.46904058769 |
| NM_000320 | QDPR    | 205  | 286  | 3.66167893458 |
| NM_000320 | QDPR    | 1029 | 1168 | 5.24664816636 |
| NM_000320 | QDPR    | 464  | 534  | 5.24664816636 |
| NM_000320 | QDPR    | 1225 | 1335 | 5.24664816636 |
| NM_000320 | QDPR    | 953  | 1013 | 3.66167893458 |
| NM_000320 | QDPR    | 591  | 704  | 4.66168566564 |
| NM_007110 | TEP1    | 7668 | 7716 | 8.0695700333  |
| NM_007110 | TEP1    | 6334 | 6389 | 9.65453253402 |
| NM_007111 | TFDP1   | 1209 | 1262 | 6.99234923757 |
| NM_007111 | TFDP1   | 466  | 521  | 5.18499430797 |
| NM_007111 | TFDP1   | 2300 | 2347 | 5.18499430797 |
| NM_007111 | TFDP1   | 1996 | 2090 | 7.76995681624 |
| NM_007111 | TFDP1   | 2417 | 2487 | 4.18499431552 |
| NM_007111 | TFDP1   | 1293 | 1331 | 5.76995008518 |
| NM_007111 | TFDP1   | 152  | 286  | 7.76995681624 |
| NM_007111 | TFDP1   | 2098 | 2191 | 7.76995681624 |
| NM_007111 | TFDP1   | 2194 | 2295 | 6.18499431552 |

|           |        |      |      |               |
|-----------|--------|------|------|---------------|
| NM_007111 | TFDP1  | 966  | 1206 | 8.18499431552 |
| NM_007111 | TFDP1  | 732  | 950  | 8.18499431552 |
| NM_007111 | TFDP1  | 323  | 419  | 6.5069224104  |
| NM_007111 | TFDP1  | 559  | 644  | 4.18498758446 |
| NM_007111 | TFDP1  | 1382 | 1775 | 9.31427733246 |
| NM_007111 | TFDP1  | 1798 | 1918 | 5.76995681624 |
| NM_000499 | CYP1A1 | 2275 | 2334 | 9.19558881986 |
| NM_000499 | CYP1A1 | 1924 | 2002 | 9.78055108466 |
| NM_000499 | CYP1A1 | 1382 | 1433 | 10.1955888196 |
| NM_000499 | CYP1A1 | 327  | 376  | 9.19558858394 |
| NM_000499 | CYP1A1 | 2135 | 2184 | 9.19157121968 |
| NM_000499 | CYP1A1 | 1524 | 1588 | 8.19558858394 |
| NM_000499 | CYP1A1 | 2381 | 2438 | 9.11144961047 |
| NM_000499 | CYP1A1 | 1816 | 1865 | 9.19558881985 |
| NM_000499 | CYP1A1 | 85   | 220  | 11.3655138213 |
| NM_000499 | CYP1A1 | 1734 | 1808 | 11.0029437419 |
| NM_000499 | CYP1A1 | 1439 | 1507 | 10.5175169147 |
| NM_000499 | CYP1A1 | 2003 | 2057 | 9.19558858394 |
| NM_000499 | CYP1A1 | 1315 | 1359 | 8.11144961047 |
| NM_000499 | CYP1A1 | 605  | 669  | 9.78055131303 |
| NM_000499 | CYP1A1 | 835  | 986  | 10.5175169147 |
| NM_000499 | CYP1A1 | 463  | 594  | 11.1955888199 |
| NM_000499 | CYP1A1 | 993  | 1131 | 11.6550204385 |
| NM_000499 | CYP1A1 | 723  | 814  | 9.78055132058 |
| NM_000499 | CYP1A1 | 1165 | 1291 | 11.1955888199 |
| NM_015420 | DCAF13 | 1338 | 1400 | 5.24831943764 |
| NM_015420 | DCAF13 | 1577 | 1641 | 5.25233703027 |
| NM_015420 | DCAF13 | 1439 | 1508 | 5.25233703027 |
| NM_015420 | DCAF13 | 1939 | 1995 | 4.24831943764 |
| NM_015420 | DCAF13 | 1511 | 1572 | 6.5742651327  |
| NM_015420 | DCAF13 | 1720 | 1805 | 6.83729953854 |
| NM_015420 | DCAF13 | 1645 | 1669 | 4.16819782843 |
| NM_015420 | DCAF13 | 966  | 1035 | 5.83328193836 |
| NM_015420 | DCAF13 | 1191 | 1316 | 6.83729953854 |
| NM_015420 | DCAF13 | 1055 | 1182 | 5.83729953854 |
| NM_015420 | DCAF13 | 2084 | 2194 | 5.83729953099 |
| NM_007118 | TRIO   | 677  | 732  | 6.64681246449 |
| NM_007118 | TRIO   | 888  | 937  | 7.23160145081 |
| NM_007118 | TRIO   | 2276 | 2312 | 6.64279510024 |
| NM_007118 | TRIO   | 9828 | 9917 | 6.64681270041 |
| NM_007118 | TRIO   | 8836 | 8956 | 6.64680596936 |
| NM_007118 | TRIO   | 461  | 527  | 6.64681246449 |
| NM_007118 | TRIO   | 8720 | 8773 | 5.64663895009 |
| NM_007118 | TRIO   | 4314 | 4350 | 6.64279510024 |
| NM_007118 | TRIO   | 1147 | 1206 | 7.6468127004  |
| NM_007118 | TRIO   | 3814 | 3874 | 5.64681246449 |
| NM_007118 | TRIO   | 1360 | 1454 | 7.23177520113 |
| NM_007118 | TRIO   | 6244 | 6350 | 5.64680596936 |
| NM_007118 | TRIO   | 3668 | 3736 | 5.64279510024 |
| NM_007118 | TRIO   | 1807 | 1880 | 5.64680596936 |

|           |          |      |      |                    |
|-----------|----------|------|------|--------------------|
| NM_007118 | TRIO     | 6697 | 6767 | 6.64681270041      |
| NM_007118 | TRIO     | 1716 | 1758 | 6.64279510024      |
| NM_007118 | TRIO     | 5828 | 5862 | 7.14763599175      |
| NM_007118 | TRIO     | 9186 | 9291 | 7.23177520091      |
| NM_007118 | TRIO     | 968  | 1078 | 7.64681270019      |
| NM_007118 | TRIO     | 1954 | 2025 | 5.64681269286      |
| NM_007118 | TRIO     | 3303 | 3392 | 7.23177520112      |
| NM_007118 | TRIO     | 2036 | 2109 | 5.64681270041      |
| NM_007118 | TRIO     | 8551 | 8639 | 7.22775760096      |
| NM_007118 | TRIO     | 8358 | 8422 | 5.64681270019      |
| NM_007118 | TRIO     | 4616 | 4685 | 7.64680596936      |
| NM_014053 | FLVCR1   | 2379 | 2436 | 8.7592463903       |
| NM_014053 | FLVCR1   | 5558 | 5631 | 10.7592396668      |
| NM_014053 | FLVCR1   | 743  | 788  | 9.75522879768      |
| NM_014053 | FLVCR1   | 5849 | 5897 | 8.75522879768      |
| NM_014053 | FLVCR1   | 2580 | 2626 | 9.67510718847      |
| NM_014053 | FLVCR1   | 5775 | 5830 | 10.3442086627      |
| NM_014053 | FLVCR1   | 906  | 963  | 9.75924639785      |
| NM_014053 | FLVCR1   | 498  | 664  | 13.0071739113      |
| NM_014053 | FLVCR1   | 1965 | 2017 | 9.75907264753      |
| NM_014053 | FLVCR1   | 5652 | 5716 | 10.344208891       |
| NM_014053 | FLVCR1   | 666  | 725  | 10.3442088986      |
| NM_014053 | FLVCR1   | 4576 | 4682 | 10.7592463979      |
| NM_014053 | FLVCR1   | 5507 | 5542 | 10.3401912984      |
| NM_014053 | FLVCR1   | 2312 | 2364 | 8.75522879768      |
| NM_014053 | FLVCR1   | 2986 | 3066 | 8.75907264753      |
| NM_014053 | FLVCR1   | 788  | 835  | 8.75907264753      |
| NM_014053 | FLVCR1   | 5392 | 5469 | 11.0811677617      |
| NM_014053 | FLVCR1   | 1083 | 1261 | 12.8467092391      |
| NM_014053 | FLVCR1   | 2657 | 2746 | 11.0811744927      |
| NM_014053 | FLVCR1   | 5087 | 5181 | 9.7592463903       |
| NM_014053 | FLVCR1   | 1262 | 1750 | 14.8467092391      |
| NM_014053 | FLVCR1   | 2060 | 2217 | 11.5666013199      |
| NM_014053 | FLVCR1   | 1876 | 1963 | 9.75924639785      |
| NM_021231 | C19orf29 |      | 1984 | 2103 10.3702439212 |
| NM_021231 | C19orf29 |      | 729  | 784 8.28610471179  |
| NM_021235 | EPS15L1  | 496  | 598  | 5.56812077996      |
| NM_021235 | EPS15L1  | 691  | 759  | 7.56812077996      |
| NM_021235 | EPS15L1  | 204  | 353  | 7.15308328068      |
| NM_021237 | SELK     | 432  | 493  | 5.54990279853      |
| NM_021237 | SELK     | 237  | 275  | 5.54973577927      |
| NM_021239 | RBM25    | 460  | 514  | 3.07508514526      |
| NM_021239 | RBM25    | 177  | 221  | 3.07910273788      |
| NM_021239 | RBM25    | 1673 | 1740 | 4.07508514526      |
| NM_021239 | RBM25    | 3906 | 3974 | 4.6640585151       |
| NM_021239 | RBM25    | 3076 | 3123 | 4.07909601438      |
| NM_021239 | RBM25    | 85   | 157  | 4.07508514526      |
| NM_021239 | RBM25    | 2453 | 2489 | 2.99496353605      |
| NM_021239 | RBM25    | 2034 | 2111 | 4.66389149584      |
| NM_021239 | RBM25    | 4038 | 4201 | 4.66406524615      |

|           |                |      |      |                |
|-----------|----------------|------|------|----------------|
| NM_021239 | RBM25          | 2985 | 3056 | 3.07910274521  |
| NM_021239 | RBM25          | 2762 | 2944 | 5.07910274543  |
| NM_021239 | RBM25          | 2297 | 2411 | 4.66406524615  |
| NM_021239 | RBM25          | 2125 | 2188 | 3.07892899511  |
| NM_021239 | RBM25          | 2489 | 2573 | 4.07910273788  |
| NM_021238 | FAM60A         | 395  | 474  | 7.89285015789  |
| NM_021238 | FAM60A         | 2939 | 3005 | 5.30788765695  |
| NM_021238 | FAM60A         | 1509 | 1602 | 5.30788765717  |
| NM_021238 | FAM60A         | 2375 | 2433 | 5.22374844779  |
| NM_021238 | FAM60A         | 2197 | 2270 | 5.30788765717  |
| NM_021238 | FAM60A         | 1065 | 1134 | 5.30788765717  |
| NM_182895 | SCARF2         | 1309 | 1420 | 9.92133584417  |
| NM_138795 | ARL8A          | 497  | 534  | 7.23885534018  |
| NM_138795 | ARL8A          | 242  | 325  | 7.32299431364  |
| NM_138795 | ARL8A          | 1530 | 1607 | 7.31897694939  |
| NM_012199 | EIF2C1         | 4291 | 4334 | 10.0480181119  |
| NM_012199 | EIF2C1         | 1833 | 1902 | 9.46305561121  |
| NM_138793 | CANT1          | 2335 | 2382 | 8.30567198003  |
| NM_138793 | CANT1          | 2010 | 2083 | 7.72070971523  |
| NM_138793 | CANT1          | 618  | 698  | 9.04263781011  |
| NM_138793 | CANT1          | 3412 | 3491 | 9.04263781011  |
| NM_138793 | CANT1          | 213  | 273  | 6.72070298417  |
| NM_138793 | CANT1          | 1792 | 1832 | 6.63657050584  |
| NM_138793 | CANT1          | 3104 | 3181 | 7.63657050584  |
| NM_138793 | CANT1          | 2713 | 2796 | 6.720709715    |
| NM_138793 | CANT1          | 3193 | 3234 | 8.71669211505  |
| NM_138793 | CANT1          | 2122 | 2197 | 8.72070971522  |
| NM_138793 | CANT1          | 478  | 544  | 7.720709715    |
| NM_138793 | CANT1          | 1532 | 1598 | 7.72070298417  |
| NM_138793 | CANT1          | 2814 | 2882 | 6.71669211505  |
| NM_138793 | CANT1          | 2528 | 2613 | 7.72070971523  |
| NM_138793 | CANT1          | 2623 | 2712 | 7.72070971523  |
| NM_138793 | CANT1          | 3281 | 3395 | 8.30567198003  |
| NM_012193 | FZD4           | 6041 | 6093 | 6.45692483299  |
| NM_014056 | HIGD1A         | 347  | 398  | 2.12301669188  |
| NM_014056 | HIGD1A         | 146  | 211  | 2.12302318701  |
| NM_014056 | HIGD1A         | 1168 | 1239 | 1.53404332204  |
| NM_014056 | HIGD1A         | 472  | 517  | 0.537887171893 |
| NM_014056 | HIGD1A         | 238  | 346  | 2.12302341538  |
| NM_012197 | RABGAP1        | 4173 | 4226 | 5.74027213602  |
| NM_199203 | TMEM189-UBE2V1 | 389  | 452  | 4.72551400139  |
| NM_199203 | TMEM189-UBE2V1 | 732  | 772  | 3.72551400139  |
| NM_199203 | TMEM189-UBE2V1 | 1560 | 1604 | 3.72568775149  |
| NM_199203 | TMEM189-UBE2V1 | 2580 | 2649 | 3.72551400139  |
| NM_199203 | TMEM189-UBE2V1 | 858  | 906  | 5.22651104304  |
| NM_199203 | TMEM189-UBE2V1 | 1328 | 1401 | 3.7256877517   |
| NM_199203 | TMEM189-UBE2V1 | 2072 | 2139 | 3.72568775171  |
| NM_199203 | TMEM189-UBE2V1 | 2247 | 2373 | 4.72568775171  |
| NM_020728 | ESYT2          | 2966 | 3047 | 8.40878421575  |
| NM_020728 | ESYT2          | 2908 | 2956 | 7.40878421574  |



|              |        |      |      |               |
|--------------|--------|------|------|---------------|
| NM_020728    | ESYT2  | 1755 | 1813 | 5.82381498397 |
| NM_020728    | ESYT2  | 2227 | 2278 | 5.81980411485 |
| NM_020728    | ESYT2  | 619  | 671  | 5.82381498397 |
| NM_020728    | ESYT2  | 951  | 1034 | 9.14574980991 |
| NM_020728    | ESYT2  | 1856 | 1905 | 6.8238217148  |
| NM_020728    | ESYT2  | 1187 | 1249 | 6.82381498397 |
| NM_020728    | ESYT2  | 2768 | 2818 | 5.81980411485 |
| NM_020728    | ESYT2  | 1573 | 1618 | 7.82364796471 |
| NM_020728    | ESYT2  | 879  | 924  | 7.40476661557 |
| NM_020728    | ESYT2  | 2379 | 2420 | 6.81980411485 |
| NM_020728    | ESYT2  | 1263 | 1390 | 9.28325333366 |
| NM_020728    | ESYT2  | 2427 | 2459 | 7.32464500636 |
| NM_020728    | ESYT2  | 542  | 600  | 8.14574980991 |
| NM_020728    | ESYT2  | 2627 | 2759 | 6.82382171503 |
| NM_020728    | ESYT2  | 1131 | 1187 | 6.82364796471 |
| NM_020728    | ESYT2  | 1419 | 1558 | 8.82382171503 |
| NM_020728    | ESYT2  | 772  | 878  | 8.14574980991 |
| NM_000146    | FTL    | 5    | 883  | 7.81716093137 |
| NM_005066    | SFPQ   | 2727 | 2773 | 2.95742622019 |
| NM_005066    | SFPQ   | 2841 | 2897 | 2.95742622041 |
| NM_005066    | SFPQ   | 390  | 451  | 1.95742622041 |
| NM_005066    | SFPQ   | 2541 | 2583 | 3.54221497081 |
| NM_005066    | SFPQ   | 2126 | 2195 | 1.95742622041 |
| NM_005066    | SFPQ   | 209  | 247  | 1.95340862023 |
| NM_005066    | SFPQ   | 2810 | 2835 | 1.95340862023 |
| NM_005066    | SFPQ   | 27   | 85   | 2.95742622041 |
| NM_005066    | SFPQ   | 2203 | 2238 | 1.95340862023 |
| NM_005066    | SFPQ   | 1877 | 1957 | 2.95742621286 |
| NM_005066    | SFPQ   | 1570 | 1670 | 1.95742622041 |
| NM_005066    | SFPQ   | 1242 | 1487 | 6.65786593855 |
| NM_005066    | SFPQ   | 1671 | 1876 | 5.54238872113 |
| NM_005066    | SFPQ   | 891  | 1238 | 7.20535373385 |
| NM_005066    | SFPQ   | 86   | 203  | 2.95742622041 |
| NM_005066    | SFPQ   | 2304 | 2462 | 3.95742622041 |
| NM_000143    | FH     | 722  | 813  | 6.01055652234 |
| NM_000143    | FH     | 831  | 942  | 6.01055652234 |
| NM_000143    | FH     | 949  | 1154 | 7.88502564026 |
| NM_000143    | FH     | 158  | 256  | 6.23294894368 |
| NM_000143    | FH     | 262  | 332  | 5.01055652234 |
| NM_000143    | FH     | 1383 | 1539 | 6.01055652234 |
| NM_000143    | FH     | 394  | 657  | 7.01055652234 |
| NM_000140    | FECH   | 447  | 503  | 7.28381711449 |
| NM_000140    | FECH   | 1519 | 1566 | 9.36795632387 |
| NM_000140    | FECH   | 2471 | 2501 | 8.28381711449 |
| NM_001142641 | FBRSL1 | 2261 | 2332 | 8.80870759614 |
| NM_001142641 | FBRSL1 | 3271 | 3369 | 11.6162362685 |
| NM_001142641 | FBRSL1 | 3148 | 3240 | 9.80888134646 |
| NM_001142641 | FBRSL1 | 1413 | 1534 | 9.80888134646 |
| NM_001142641 | FBRSL1 | 4084 | 4147 | 8.80888134645 |
| NM_001142641 | FBRSL1 | 3370 | 3540 | 11.1308094413 |

|              |           |       |       |               |               |
|--------------|-----------|-------|-------|---------------|---------------|
| NM_194071    | CREB3L2   | 2081  | 2131  | 6.46643313258 |               |
| NM_194071    | CREB3L2   | 1905  | 1952  | 6.46660688289 |               |
| NM_194071    | CREB3L2   | 1253  | 1320  | 5.46643313258 |               |
| NM_001142646 | TPRA1     | 470   | 587   | 9.36003838109 |               |
| NM_001142646 | TPRA1     | 667   | 791   | 9.36003838109 |               |
| NM_001142646 | TPRA1     | 339   | 412   | 8.35602078092 |               |
| NM_021052    | HIST1H2AE |       | 15    | 93            | 11.7153119723 |
| NM_021052    | HIST1H2AE |       | 113   | 168           | 8.25570660339 |
| NM_021052    | HIST1H2AE |       | 197   | 286           | 10.8408428544 |
| NM_173500    | TTBK2     | 663   | 712   | 8.79700958869 |               |
| NM_173054    | RELN      | 9387  | 9429  | 5.23760495332 |               |
| NM_173054    | RELN      | 9325  | 9357  | 4.6526424526  |               |
| NM_173054    | RELN      | 10558 | 10662 | 5.9745707834  |               |
| NM_173054    | RELN      | 1354  | 1463  | 5.23760518924 |               |
| NM_173054    | RELN      | 3846  | 3883  | 3.64862508834 |               |
| NM_173054    | RELN      | 2988  | 3059  | 5.23760518901 |               |
| NM_173054    | RELN      | 1139  | 1218  | 5.9745707834  |               |
| NM_173054    | RELN      | 581   | 635   | 4.65264268829 |               |
| NM_173054    | RELN      | 5019  | 5121  | 7.11207430715 |               |
| NM_173054    | RELN      | 4008  | 4079  | 6.65264268852 |               |
| NM_173054    | RELN      | 1464  | 1523  | 5.23760518924 |               |
| NM_173054    | RELN      | 9583  | 9641  | 3.65264268852 |               |
| NM_173054    | RELN      | 2159  | 2267  | 6.45999761057 |               |
| NM_173054    | RELN      | 355   | 450   | 4.65264268852 |               |
| NM_173054    | RELN      | 9895  | 9938  | 5.23760518924 |               |
| NM_173054    | RELN      | 3902  | 3949  | 5.97457077585 |               |
| NM_173054    | RELN      | 4629  | 4681  | 3.65264268852 |               |
| NM_173054    | RELN      | 1234  | 1290  | 4.65263595746 |               |
| NM_173054    | RELN      | 2078  | 2129  | 4.6526424526  |               |
| NM_173054    | RELN      | 9443  | 9523  | 5.23760518924 |               |
| NM_173054    | RELN      | 6951  | 7052  | 5.23759845818 |               |
| NM_173054    | RELN      | 4310  | 4377  | 3.64862508834 |               |
| NM_173054    | RELN      | 11275 | 11314 | 3.65263595746 |               |
| NM_173054    | RELN      | 6401  | 6507  | 6.23760518924 |               |
| NM_173054    | RELN      | 4902  | 5010  | 7.23760518924 |               |
| NM_173054    | RELN      | 10663 | 10736 | 4.65263595746 |               |
| NM_173054    | RELN      | 2282  | 2391  | 7.23760518924 |               |
| NM_173054    | RELN      | 2938  | 2980  | 5.15346597985 |               |
| NM_173054    | RELN      | 8483  | 8600  | 6.65264268852 |               |
| NM_173054    | RELN      | 8214  | 8474  | 7.82256768996 |               |
| NM_173054    | RELN      | 4557  | 4618  | 5.23759845818 |               |
| NM_173054    | RELN      | 8650  | 8697  | 3.6524689382  |               |
| NM_173054    | RELN      | 9230  | 9319  | 6.65264268852 |               |
| NM_173054    | RELN      | 8085  | 8185  | 6.65264268852 |               |
| NM_173054    | RELN      | 7076  | 7145  | 5.9745707834  |               |
| NM_173054    | RELN      | 255   | 283   | 3.56850347913 |               |
| NM_173054    | RELN      | 7926  | 8056  | 6.23760518924 |               |
| NM_173054    | RELN      | 2431  | 2547  | 5.9745707834  |               |
| NM_173054    | RELN      | 7235  | 7397  | 7.23760518924 |               |
| NM_173054    | RELN      | 4402  | 4548  | 6.9745707834  |               |

|           |       |       |       |               |
|-----------|-------|-------|-------|---------------|
| NM_173054 | RELN  | 1534  | 1630  | 6.9745707834  |
| NM_173054 | RELN  | 863   | 924   | 5.23760518924 |
| NM_173054 | RELN  | 5624  | 5729  | 6.23760518924 |
| NM_173054 | RELN  | 6550  | 6648  | 6.23760518924 |
| NM_173054 | RELN  | 7642  | 7881  | 7.45999761057 |
| NM_173054 | RELN  | 3364  | 3550  | 7.55953328412 |
| NM_173054 | RELN  | 473   | 571   | 5.23760518924 |
| NM_173054 | RELN  | 4096  | 4266  | 6.45999761057 |
| NM_173054 | RELN  | 10019 | 10109 | 5.23760518923 |
| NM_173054 | RELN  | 2705  | 2825  | 6.23760518924 |
| NM_173054 | RELN  | 2831  | 2930  | 5.9745707834  |
| NM_173054 | RELN  | 3176  | 3243  | 5.9745707834  |
| NM_173054 | RELN  | 6790  | 6897  | 6.9745707834  |
| NM_173054 | RELN  | 956   | 1059  | 6.23760518924 |
| NM_173054 | RELN  | 65    | 126   | 4.65264268852 |
| NM_173054 | RELN  | 5146  | 5623  | 8.6068389989  |
| NM_173054 | RELN  | 695   | 863   | 6.9745707834  |
| NM_173054 | RELN  | 7398  | 7561  | 6.23760518924 |
| NM_173054 | RELN  | 8698  | 8969  | 8.11207430715 |
| NM_173054 | RELN  | 8997  | 9221  | 7.65264268852 |
| NM_173054 | RELN  | 6145  | 6334  | 7.23760518924 |
| NM_173054 | RELN  | 4769  | 4887  | 4.65264268852 |
| NM_173054 | RELN  | 1634  | 2047  | 8.51062368364 |
| NM_173054 | RELN  | 2556  | 2681  | 6.82256768996 |
| NM_173054 | RELN  | 4692  | 4762  | 5.65264268852 |
| NM_173054 | RELN  | 10889 | 11087 | 6.65264268852 |
| NM_173054 | RELN  | 10392 | 10531 | 5.65264268852 |
| NM_173054 | RELN  | 9680  | 9837  | 5.23760518924 |
| NM_173054 | RELN  | 6669  | 6757  | 5.23760518924 |
| NM_173054 | RELN  | 5891  | 6061  | 8.04496011129 |
| NM_003129 | SQLE  | 1096  | 1167  | 7.12573878485 |
| NM_003129 | SQLE  | 1367  | 1453  | 6.54077628412 |
| NM_003129 | SQLE  | 2159  | 2256  | 7.12573878485 |
| NM_003129 | SQLE  | 2403  | 2637  | 8.59966997318 |
| NM_003129 | SQLE  | 192   | 280   | 5.54077604821 |
| NM_003129 | SQLE  | 751   | 836   | 6.76316870546 |
| NM_003129 | SQLE  | 1455  | 1499  | 5.54060253381 |
| NM_003129 | SQLE  | 1928  | 1977  | 6.27774187829 |
| NM_003129 | SQLE  | 1818  | 1872  | 5.9558137834  |
| NM_003129 | SQLE  | 313   | 411   | 6.54077628412 |
| NM_003129 | SQLE  | 1655  | 1791  | 7.41524540204 |
| NM_003129 | SQLE  | 2276  | 2401  | 7.54077628412 |
| NM_003129 | SQLE  | 467   | 533   | 5.54076955307 |
| NM_003129 | SQLE  | 1168  | 1349  | 6.54077628412 |
| NM_003129 | SQLE  | 1978  | 2095  | 6.9558137834  |
| NM_003129 | SQLE  | 2646  | 2803  | 4.9558137834  |
| NM_003129 | SQLE  | 863   | 1064  | 7.86270437901 |
| NM_004798 | KIF3B | 886   | 945   | 5.61343053083 |
| NM_004798 | KIF3B | 5795  | 5852  | 4.61343053105 |
| NM_004798 | KIF3B | 994   | 1077  | 4.6134305235  |

|              |          |      |      |               |               |
|--------------|----------|------|------|---------------|---------------|
| NM_004798    | KIF3B    | 2566 | 2641 | 5.61343053105 |               |
| NM_004798    | KIF3B    | 3556 | 3642 | 6.19839303177 |               |
| NM_004798    | KIF3B    | 4290 | 4323 | 4.60941293088 |               |
| NM_004798    | KIF3B    | 4188 | 4248 | 6.19839279585 |               |
| NM_004798    | KIF3B    | 265  | 329  | 5.60941293088 |               |
| NM_004798    | KIF3B    | 2240 | 2278 | 5.52929132167 |               |
| NM_004798    | KIF3B    | 4605 | 4682 | 6.19839303177 |               |
| NM_004798    | KIF3B    | 2723 | 2805 | 6.93535862594 |               |
| NM_004798    | KIF3B    | 1081 | 1180 | 6.19839303177 |               |
| NM_004798    | KIF3B    | 5221 | 5324 | 5.61343053105 |               |
| NM_004798    | KIF3B    | 4909 | 4954 | 4.61325678073 |               |
| NM_004798    | KIF3B    | 4975 | 5098 | 6.61343053105 |               |
| NM_004798    | KIF3B    | 4344 | 4445 | 6.61343053105 |               |
| NM_004798    | KIF3B    | 5718 | 5780 | 5.61343029513 |               |
| NM_004798    | KIF3B    | 633  | 714  | 4.60941293088 |               |
| NM_004798    | KIF3B    | 88   | 204  | 8.07286214969 |               |
| NM_004798    | KIF3B    | 334  | 443  | 8.07286214969 |               |
| NM_004798    | KIF3B    | 3760 | 3873 | 6.93535862594 |               |
| NM_004798    | KIF3B    | 1433 | 1515 | 4.61343029513 |               |
| NM_004798    | KIF3B    | 1587 | 1657 | 4.52929132167 |               |
| NM_004798    | KIF3B    | 3902 | 3961 | 4.6134238     |               |
| NM_004798    | KIF3B    | 5917 | 6070 | 7.61343053105 |               |
| NM_004798    | KIF3B    | 2139 | 2207 | 6.19839303177 |               |
| NM_004798    | KIF3B    | 4791 | 4883 | 6.19839303177 |               |
| NM_004798    | KIF3B    | 3645 | 3747 | 5.61343053105 |               |
| NM_004798    | KIF3B    | 3314 | 3406 | 6.61343053105 |               |
| NM_004798    | KIF3B    | 3204 | 3273 | 4.60941293088 |               |
| NM_004798    | KIF3B    | 5337 | 5467 | 6.61343053105 |               |
| NM_004798    | KIF3B    | 2887 | 2952 | 5.61343053105 |               |
| NM_004798    | KIF3B    | 3002 | 3067 | 6.19839302422 |               |
| NM_004798    | KIF3B    | 5471 | 5630 | 7.61343053105 |               |
| NM_144732    | HNRNPUL1 |      | 966  | 1109          | 7.87548849569 |
| NM_144732    | HNRNPUL1 |      | 2426 | 2453          | 4.2865083948  |
| NM_144732    | HNRNPUL1 |      | 2034 | 2070          | 4.2865083948  |
| NM_144732    | HNRNPUL1 |      | 3110 | 3228          | 7.61245408986 |
| NM_144732    | HNRNPUL1 |      | 2207 | 2358          | 6.29052599497 |
| NM_144732    | HNRNPUL1 |      | 388  | 543           | 7.74995761361 |
| NM_144732    | HNRNPUL1 |      | 2587 | 2666          | 6.61245408986 |
| NM_144732    | HNRNPUL1 |      | 307  | 378           | 4.29052599497 |
| NM_144732    | HNRNPUL1 |      | 550  | 698           | 7.61245408986 |
| NM_144732    | HNRNPUL1 |      | 2481 | 2586          | 5.29052599497 |
| NM_144732    | HNRNPUL1 |      | 102  | 247           | 5.87548849569 |
| NM_144732    | HNRNPUL1 |      | 1116 | 1241          | 5.87548849569 |
| NM_144732    | HNRNPUL1 |      | 2923 | 3019          | 7.29052599497 |
| NM_144732    | HNRNPUL1 |      | 1373 | 1631          | 8.09788091703 |
| NM_144732    | HNRNPUL1 |      | 2771 | 2845          | 5.87548849569 |
| NM_144732    | HNRNPUL1 |      | 698  | 962           | 8.87548849569 |
| NM_144732    | HNRNPUL1 |      | 1303 | 1373          | 4.29052599475 |
| NM_001174126 | SLC11A2  | 656  | 701  | 7.46776351882 |               |
| NM_001174126 | SLC11A2  | 504  | 578  | 7.46777024987 |               |

|              |         |      |      |               |
|--------------|---------|------|------|---------------|
| NM_001174126 | SLC11A2 | 1790 | 1893 | 7.88280774915 |
| NM_001174126 | SLC11A2 | 1365 | 1507 | 9.46777024987 |
| NM_001174126 | SLC11A2 | 406  | 497  | 9.20473584404 |
| NM_001174126 | SLC11A2 | 1520 | 1594 | 8.46777024987 |
| NM_001174126 | SLC11A2 | 601  | 654  | 5.8828010181  |
| NM_001174126 | SLC11A2 | 104  | 217  | 7.88280774915 |
| NM_001174126 | SLC11A2 | 847  | 944  | 7.88280774915 |
| NM_001174126 | SLC11A2 | 314  | 402  | 8.46777024987 |
| NM_001174126 | SLC11A2 | 1603 | 1773 | 9.88280774915 |
| NM_001174126 | SLC11A2 | 706  | 800  | 9.34223936779 |
| NM_001174126 | SLC11A2 | 972  | 1364 | 10.4677702499 |
| NM_004793    | LONP1   | 542  | 590  | 3.59548071306 |
| NM_004793    | LONP1   | 465  | 519  | 4.595473982   |
| NM_004793    | LONP1   | 2454 | 2511 | 3.59146311288 |
| NM_004793    | LONP1   | 142  | 188  | 3.59548070551 |
| NM_004793    | LONP1   | 221  | 311  | 3.59548070551 |
| NM_004793    | LONP1   | 2723 | 2789 | 3.51134150367 |
| NM_004793    | LONP1   | 1638 | 1708 | 4.59548071305 |
| NM_004793    | LONP1   | 1325 | 1377 | 4.59548047714 |
| NM_004793    | LONP1   | 1148 | 1252 | 5.18044321378 |
| NM_004793    | LONP1   | 602  | 834  | 7.05491233169 |
| NM_004793    | LONP1   | 2299 | 2452 | 6.40283563511 |
| NM_004793    | LONP1   | 2164 | 2236 | 4.59548071306 |
| NM_004793    | LONP1   | 1377 | 1637 | 6.7654057145  |
| NM_004793    | LONP1   | 922  | 1079 | 6.18044321378 |
| NM_004793    | LONP1   | 1772 | 2132 | 7.7654057145  |
| NM_004793    | LONP1   | 2904 | 3044 | 4.59548071306 |
| NM_004792    | PPIG    | 715  | 751  | 3.39128331805 |
| NM_004792    | PPIG    | 623  | 694  | 2.39128331805 |
| NM_004792    | PPIG    | 414  | 477  | 2.47140492726 |
| NM_004792    | PPIG    | 276  | 377  | 3.47542252743 |
| NM_181501    | ITGA1   | 1354 | 1440 | 9.01824291518 |
| NM_181501    | ITGA1   | 3344 | 3415 | 8.55881129654 |
| NM_181501    | ITGA1   | 882  | 961  | 8.3661662186  |
| NM_181501    | ITGA1   | 163  | 292  | 8.3661662186  |
| NM_181501    | ITGA1   | 2043 | 2094 | 7.88073939143 |
| NM_181501    | ITGA1   | 656  | 715  | 5.55881129653 |
| NM_181501    | ITGA1   | 3439 | 3472 | 6.55479369637 |
| NM_181501    | ITGA1   | 1174 | 1282 | 9.01824291518 |
| NM_181501    | ITGA1   | 2788 | 2941 | 9.14377379726 |
| NM_181501    | ITGA1   | 65   | 133  | 6.55881106062 |
| NM_181501    | ITGA1   | 779  | 822  | 5.55881129632 |
| NM_181501    | ITGA1   | 2947 | 3004 | 7.55881129654 |
| NM_181501    | ITGA1   | 990  | 1138 | 8.88073939143 |
| NM_181501    | ITGA1   | 2109 | 2174 | 6.55479369637 |
| NM_181501    | ITGA1   | 2299 | 2450 | 9.64627413779 |
| NM_181501    | ITGA1   | 3472 | 3590 | 9.46570189215 |
| NM_181501    | ITGA1   | 1529 | 1727 | 9.14377379726 |
| NM_181501    | ITGA1   | 401  | 595  | 8.72873629798 |
| NM_181501    | ITGA1   | 2459 | 2642 | 8.88073939143 |

|              |           |      |      |               |               |
|--------------|-----------|------|------|---------------|---------------|
| NM_181501    | ITGA1     | 3084 | 3342 | 10.2592510147 |               |
| NM_181501    | ITGA1     | 292  | 342  | 6.47467208715 |               |
| NM_181501    | ITGA1     | 2646 | 2746 | 8.55881129654 |               |
| NM_181501    | ITGA1     | 1444 | 1526 | 6.55881106062 |               |
| NM_181501    | ITGA1     | 1763 | 2040 | 9.55881129654 |               |
| NM_181501    | ITGA1     | 2177 | 2278 | 8.55881129654 |               |
| NM_201542    | MED8      | 1188 | 1243 | 3.60770386608 |               |
| NM_201542    | MED8      | 138  | 197  | 3.69183634441 |               |
| NM_175902    | C17orf101 |      | 3306 | 3344          | 5.83035739144 |
| NM_175902    | C17orf101 |      | 1420 | 1467          | 4.9144963649  |
| NM_175902    | C17orf101 |      | 616  | 678           | 5.91448986977 |
| NM_175902    | C17orf101 |      | 725  | 789           | 6.41531989216 |
| NM_175902    | C17orf101 |      | 3420 | 3483          | 6.91047900065 |
| NM_175902    | C17orf101 |      | 2299 | 2359          | 4.83035739144 |
| NM_175902    | C17orf101 |      | 947  | 1010          | 5.91448986977 |
| NM_175902    | C17orf101 |      | 1101 | 1176          | 4.91047900065 |
| NM_001102371 | FOXRED2   | 2098 | 2171 | 8.11613790777 |               |
| NM_001102371 | FOXRED2   | 516  | 579  | 8.11613790777 |               |
| NM_001102371 | FOXRED2   | 2805 | 2852 | 8.11613790776 |               |
| NM_001102371 | FOXRED2   | 373  | 440  | 8.11613790755 |               |
| NM_001102371 | FOXRED2   | 4468 | 4546 | 8.11596415745 |               |
| NM_001102371 | FOXRED2   | 1764 | 1887 | 9.11613790777 |               |
| NM_001102371 | FOXRED2   | 2401 | 2481 | 8.11613767185 |               |
| NM_001102371 | FOXRED2   | 1515 | 1548 | 7.03199869839 |               |
| NM_001102371 | FOXRED2   | 1097 | 1196 | 9.43806600266 |               |
| NM_001102371 | FOXRED2   | 3102 | 3143 | 7.11613117672 |               |
| NM_001102371 | FOXRED2   | 4247 | 4295 | 7.11613117672 |               |
| NM_001102371 | FOXRED2   | 1556 | 1653 | 10.1161379078 |               |
| NM_001102371 | FOXRED2   | 694  | 799  | 9.70110040849 |               |
| NM_001102371 | FOXRED2   | 843  | 965  | 9.43806600266 |               |
| NM_001102371 | FOXRED2   | 4646 | 4772 | 9.70110040849 |               |
| NM_139353    | TAF1C     | 391  | 462  | 8.7302620409  |               |
| NM_139353    | TAF1C     | 2551 | 2597 | 9.64612956257 |               |
| NM_031296    | RAB33B    | 1850 | 1895 | 6.0697836602  |               |
| NM_006795    | EHD1      | 745  | 785  | 6.78127829593 |               |
| NM_006795    | EHD1      | 1432 | 1464 | 5.86139990514 |               |
| NM_006795    | EHD1      | 515  | 586  | 5.8654172694  |               |
| NM_006795    | EHD1      | 875  | 988  | 5.86541750531 |               |
| NM_006795    | EHD1      | 803  | 859  | 6.86139990514 |               |
| NM_003366    | UQCRC2    | 559  | 610  | 4.39254493438 |               |
| NM_003366    | UQCRC2    | 96   | 178  | 4.61493735571 |               |
| NM_003366    | UQCRC2    | 1408 | 1541 | 4.61493735571 |               |
| NM_003366    | UQCRC2    | 1238 | 1361 | 4.9775074351  |               |
| NM_003366    | UQCRC2    | 388  | 463  | 3.39254493438 |               |
| NM_003366    | UQCRC2    | 830  | 947  | 3.80758243366 |               |
| NM_003366    | UQCRC2    | 629  | 827  | 6.12951052854 |               |
| NM_003366    | UQCRC2    | 269  | 372  | 4.80758243366 |               |
| NM_003366    | UQCRC2    | 472  | 544  | 4.80758243366 |               |
| NM_003366    | UQCRC2    | 1103 | 1230 | 4.9775074351  |               |
| NM_001002029 | C4B       | 1470 | 1558 | 4.7414867751  |               |

|              |         |      |      |                |
|--------------|---------|------|------|----------------|
| NM_001002029 | C4B     | 1911 | 1982 | 4.15652427437  |
| NM_001002029 | C4B     | 3368 | 3419 | 4.15652426683  |
| NM_001002029 | C4B     | 131  | 161  | 4.1525066742   |
| NM_001002029 | C4B     | 2381 | 2496 | 5.47845236927  |
| NM_001002029 | C4B     | 3959 | 4026 | 5.15652426683  |
| NM_001002029 | C4B     | 1258 | 1324 | 4.15652427438  |
| NM_001002029 | C4B     | 2788 | 2863 | 3.15652427438  |
| NM_001002029 | C4B     | 3423 | 3488 | 4.74148653918  |
| NM_001002029 | C4B     | 44   | 80   | 4.1525066742   |
| NM_001002029 | C4B     | 2866 | 3035 | 6.15652427438  |
| NM_001002029 | C4B     | 4711 | 4753 | 4.15635052406  |
| NM_001002029 | C4B     | 1346 | 1418 | 3.15652426683  |
| NM_001002029 | C4B     | 377  | 428  | 3.07238506499  |
| NM_001002029 | C4B     | 1561 | 1664 | 5.15652427438  |
| NM_001002029 | C4B     | 2255 | 2285 | 4.15652403846  |
| NM_001002029 | C4B     | 440  | 611  | 4.7414867751   |
| NM_001002029 | C4B     | 5093 | 5216 | 5.15652427438  |
| NM_001002029 | C4B     | 642  | 750  | 4.74148676755  |
| NM_001002029 | C4B     | 4608 | 4704 | 3.15652427438  |
| NM_001002029 | C4B     | 4771 | 4851 | 4.1525066742   |
| NM_001002029 | C4B     | 4275 | 4406 | 3.15652427438  |
| NM_001002029 | C4B     | 4498 | 4582 | 4.15652427438  |
| NM_001002029 | C4B     | 2009 | 2115 | 4.15652427438  |
| NM_001002029 | C4B     | 2549 | 2672 | 5.7414867751   |
| NM_001002029 | C4B     | 4134 | 4271 | 3.15652427438  |
| NM_001002029 | C4B     | 3046 | 3269 | 5.47845236927  |
| NM_153649    | TPM3    | 596  | 664  | 3.58428948765  |
| NM_153649    | TPM3    | 2442 | 2498 | 0.999326986934 |
| NM_153649    | TPM3    | 1451 | 1494 | 1.99530938676  |
| NM_153649    | TPM3    | 1001 | 1125 | 3.32125508182  |
| NM_153649    | TPM3    | 282  | 340  | 2.99932698693  |
| NM_153649    | TPM3    | 1624 | 1834 | 4.69976670507  |
| NM_153649    | TPM3    | 1501 | 1604 | 4.32125508182  |
| NM_153649    | TPM3    | 1964 | 2123 | 4.90621758254  |
| NM_153649    | TPM3    | 74   | 187  | 2.99932698693  |
| NM_153649    | TPM3    | 700  | 1001 | 4.80668190899  |
| NM_153649    | TPM3    | 354  | 595  | 3.80668190899  |
| NM_153649    | TPM3    | 1157 | 1268 | 2.99932698693  |
| NM_153649    | TPM3    | 1843 | 1946 | 2.58428948765  |
| NM_006243    | PPP2R5A | 2298 | 2388 | 8.14638031749  |
| NM_006243    | PPP2R5A | 892  | 951  | 6.82043462243  |
| NM_006243    | PPP2R5A | 1710 | 1783 | 5.82444549155  |
| NM_006243    | PPP2R5A | 804  | 861  | 6.8244522226   |
| NM_006243    | PPP2R5A | 241  | 292  | 7.40940799227  |
| NM_006243    | PPP2R5A | 1123 | 1248 | 8.99437722404  |
| NM_003362    | UNG     | 1176 | 1227 | 4.04515835184  |
| NM_003362    | UNG     | 1677 | 1734 | 5.12527996105  |
| NM_003362    | UNG     | 1027 | 1092 | 5.71425982603  |
| NM_003362    | UNG     | 1901 | 1943 | 4.12929083017  |
| NM_003362    | UNG     | 1475 | 1529 | 5.04515835184  |

|              |          |      |      |                   |
|--------------|----------|------|------|-------------------|
| NM_003362    | UNG      | 716  | 796  | 5.71426006195     |
| NM_003362    | UNG      | 884  | 945  | 5.12527996105     |
| NM_003362    | UNG      | 2027 | 2108 | 6.71426006195     |
| NM_003362    | UNG      | 121  | 218  | 5.71426006195     |
| NM_006241    | PPP1R2   | 1467 | 1583 | 4.11864095303     |
| NM_006241    | PPP1R2   | 1116 | 1166 | 4.03450174365     |
| NM_006241    | PPP1R2   | 263  | 359  | 4.53367845231     |
| NM_001042517 | DIAPH3   | 2130 | 2213 | 6.46778332865     |
| NM_001042517 | DIAPH3   | 2913 | 2974 | 7.46795684305     |
| NM_001042517 | DIAPH3   | 527  | 633  | 7.46795684305     |
| NM_003368    | USP1     | 3727 | 3788 | 5.82221148174     |
| NM_003368    | USP1     | 3249 | 3321 | 6.82220475068     |
| NM_003368    | USP1     | 704  | 746  | 5.23323138084     |
| NM_003368    | USP1     | 2262 | 2341 | 6.55917707568     |
| NM_003368    | USP1     | 1205 | 1239 | 4.15310977163     |
| NM_003368    | USP1     | 632  | 697  | 5.23724224996     |
| NM_003368    | USP1     | 3018 | 3100 | 5.2370752307      |
| NM_004864    | GDF15    | 5    | 610  | 10.5958003226     |
| NM_004864    | GDF15    | 863  | 1214 | 10.2868500817     |
| NM_004864    | GDF15    | 611  | 863  | 9.07874188639     |
| NM_020184    | CNNM4    | 2096 | 2141 | 8.04084707747     |
| NM_020184    | CNNM4    | 534  | 626  | 8.70994878735     |
| NM_020184    | CNNM4    | 2148 | 2241 | 8.70994878757     |
| NM_020184    | CNNM4    | 1348 | 1426 | 8.70994878757     |
| NM_020184    | CNNM4    | 4643 | 4700 | 8.70994205652     |
| NM_020184    | CNNM4    | 2305 | 2386 | 7.12498628663     |
| NM_020184    | CNNM4    | 293  | 358  | 7.12498605093     |
| NM_020184    | CNNM4    | 651  | 732  | 8.12498628663     |
| NM_004863    | SPTLC2   | 1077 | 1128 | 7.6719539615      |
| NM_004863    | SPTLC2   | 903  | 970  | 7.6719541972      |
| NM_004863    | SPTLC2   | 1552 | 1616 | 8.47930911948     |
| NM_004863    | SPTLC2   | 1265 | 1389 | 7.99388229231     |
| NM_004863    | SPTLC2   | 5202 | 5241 | 6.66793659725     |
| NM_004863    | SPTLC2   | 329  | 413  | 6.66793659725     |
| NM_004863    | SPTLC2   | 1411 | 1450 | 5.58781498804     |
| NM_004863    | SPTLC2   | 2549 | 2588 | 6.66793659725     |
| NM_004863    | SPTLC2   | 464  | 660  | 8.67195419742     |
| NM_004863    | SPTLC2   | 803  | 903  | 7.67195419742     |
| NM_004863    | SPTLC2   | 1621 | 1687 | 6.66793659725     |
| NM_004863    | SPTLC2   | 1804 | 1893 | 6.67195419742     |
| NM_020187    | C3orf37  | 518  | 654  | 8.88286606932     |
| NM_020187    | C3orf37  | 827  | 908  | 8.2979035686      |
| NM_020187    | C3orf37  | 236  | 317  | 8.2979035686      |
| NM_020187    | C3orf37  | 1299 | 1366 | 6.29789683754     |
| NM_020187    | C3orf37  | 1129 | 1291 | 9.10525849065     |
| NM_020187    | C3orf37  | 1441 | 1499 | 6.29789683754     |
| NM_020187    | C3orf37  | 734  | 815  | 7.88286606932     |
| NM_020187    | C3orf37  | 454  | 511  | 6.29388596842     |
| NM_020188    | C16orf61 |      | 194  | 255 2.93717525941 |
| NM_020188    | C16orf61 |      | 145  | 178 2.34819515851 |



|           |          |      |      |      |               |
|-----------|----------|------|------|------|---------------|
| NM_020188 | C16orf61 |      | 273  | 382  | 3.93717525941 |
| NM_020188 | C16orf61 |      | 460  | 561  | 2.35221275869 |
| NM_006445 | PRPF8    | 5301 | 5438 |      | 6.96944918255 |
| NM_006445 | PRPF8    | 166  | 239  |      | 3.26900946441 |
| NM_006445 | PRPF8    | 4127 | 4193 |      | 5.85397196513 |
| NM_006445 | PRPF8    | 3233 | 3305 |      | 6.43893446585 |
| NM_006445 | PRPF8    | 404  | 439  |      | 4.26499186423 |
| NM_006445 | PRPF8    | 7085 | 7153 |      | 5.26900946441 |
| NM_006445 | PRPF8    | 3540 | 3695 |      | 6.72844108304 |
| NM_006445 | PRPF8    | 6747 | 6827 |      | 5.2690094644  |
| NM_006445 | PRPF8    | 308  | 369  |      | 4.2690094644  |
| NM_006445 | PRPF8    | 6610 | 6675 |      | 4.26499186423 |
| NM_006445 | PRPF8    | 251  | 294  |      | 4.26900922849 |
| NM_006445 | PRPF8    | 2633 | 2748 |      | 6.26900946441 |
| NM_006445 | PRPF8    | 5528 | 5582 |      | 3.26499186423 |
| NM_006445 | PRPF8    | 749  | 937  |      | 7.17590006001 |
| NM_006445 | PRPF8    | 943  | 1108 |      | 6.72844108304 |
| NM_006445 | PRPF8    | 2315 | 2530 |      | 6.72844108304 |
| NM_006445 | PRPF8    | 443  | 616  |      | 6.96944918255 |
| NM_006445 | PRPF8    | 4214 | 4275 |      | 5.26499186423 |
| NM_006445 | PRPF8    | 66   | 147  |      | 5.59093755929 |
| NM_006445 | PRPF8    | 625  | 748  |      | 5.85397196513 |
| NM_006445 | PRPF8    | 3317 | 3528 |      | 7.43893446585 |
| NM_006445 | PRPF8    | 5439 | 5519 |      | 5.59093755929 |
| NM_006445 | PRPF8    | 1555 | 1708 |      | 6.85397196513 |
| NM_006445 | PRPF8    | 6319 | 6504 |      | 6.72844108304 |
| NM_006445 | PRPF8    | 2767 | 3227 |      | 8.79257142046 |
| NM_006445 | PRPF8    | 1710 | 2278 |      | 8.99692991897 |
| NM_006445 | PRPF8    | 4283 | 5241 |      | 9.57279021258 |
| NM_006445 | PRPF8    | 3720 | 4115 |      | 8.07636438646 |
| NM_006445 | PRPF8    | 5582 | 6266 |      | 8.59093755929 |
| NM_006445 | PRPF8    | 6879 | 6999 |      | 6.26900946441 |
| NM_006445 | PRPF8    | 7170 | 7279 |      | 5.59093755929 |
| NM_006445 | PRPF8    | 1108 | 1527 |      | 8.26900946441 |
| NM_004869 | VPS4B    | 652  | 719  |      | 4.73394549877 |
| NM_004869 | VPS4B    | 830  | 901  |      | 4.73394549877 |
| NM_004869 | VPS4B    | 995  | 1135 |      | 6.31891473054 |
| NM_003124 | SPR      | 1309 | 1365 |      | 6.41336998791 |
| NM_003124 | SPR      | 764  | 806  |      | 6.40935262366 |
| NM_003124 | SPR      | 816  | 901  |      | 8.73529831872 |
| NM_003124 | SPR      | 955  | 1044 |      | 7.41336349278 |
| NM_003124 | SPR      | 63   | 94   |      | 6.41336998791 |
| NM_003124 | SPR      | 620  | 750  |      | 8.99833272455 |
| NM_003124 | SPR      | 332  | 505  |      | 9.58329522527 |
| NM_003124 | SPR      | 1176 | 1256 |      | 6.41337021628 |
| NM_003124 | SPR      | 508  | 616  |      | 8.73529831872 |
| NM_144679 | C17orf56 |      | 2035 | 2089 | 8.429976498   |
| NM_144679 | C17orf56 |      | 753  | 834  | 9.51411570717 |
| NM_144679 | C17orf56 |      | 302  | 355  | 8.51410897633 |
| NM_144679 | C17orf56 |      | 1179 | 1251 | 9.51411569984 |

|              |            |      |               |               |
|--------------|------------|------|---------------|---------------|
| NM_001199885 | C15orf63   | 227  | 276           | 1.77568131986 |
| NM_001199885 | C15orf63   | 368  | 455           | 3.85982052924 |
| NM_003655    | CBX4 278   | 331  | 5.11595065002 |               |
| NM_003655    | CBX4 1555  | 1595 | 5.11595065002 |               |
| NM_003655    | CBX4 1785  | 1820 | 4.03198519096 |               |
| NM_003655    | CBX4 2146  | 2263 | 6.11612440034 |               |
| NM_001199663 | PMF1-BGLAP | 262  | 380           | 10.0047577561 |
| NM_144676    | TMED6 682  | 737  | 6.89601743697 |               |
| NM_144676    | TMED6 777  | 895  | 7.89601743697 |               |
| NM_144676    | TMED6 414  | 674  | 10.0659424384 |               |
| NM_144676    | TMED6 56   | 285  | 9.06594243842 |               |
| NM_198150    | ARSK 329   | 398  | 8.84655650561 |               |
| NM_198150    | ARSK 1617  | 1746 | 8.84655650562 |               |
| NM_198150    | ARSK 1206  | 1314 | 9.43151900634 |               |
| NM_198150    | ARSK 784   | 846  | 7.84654977456 |               |
| NM_198150    | ARSK 879   | 954  | 7.8463827553  |               |
| NM_198150    | ARSK 648   | 760  | 8.43151900633 |               |
| NM_198150    | ARSK 1848  | 1960 | 8.43151900634 |               |
| NM_198150    | ARSK 1053  | 1127 | 6.84655650561 |               |
| NM_198150    | ARSK 508   | 610  | 8.84655650562 |               |
| NM_198150    | ARSK 1412  | 1531 | 9.43151900634 |               |
| NM_001007561 | IRGQ 2721  | 2764 | 10.9661783713 |               |
| NM_001007561 | IRGQ 1243  | 1341 | 9.97019597147 |               |
| NM_001007561 | IRGQ 7593  | 7648 | 9.97002222115 |               |
| NM_001007561 | IRGQ 832   | 918  | 12.2921240664 |               |
| NM_001007561 | IRGQ 7403  | 7521 | 13.2921240664 |               |
| NM_001007561 | IRGQ 1167  | 1225 | 10.9701959639 |               |
| NM_001007561 | IRGQ 3259  | 3317 | 11.5551584722 |               |
| NM_001007561 | IRGQ 4744  | 4799 | 10.9701959715 |               |
| NM_001007561 | IRGQ 473   | 534  | 10.9701892404 |               |
| NM_001007561 | IRGQ 3797  | 3853 | 10.9701959639 |               |
| NM_001007561 | IRGQ 3402  | 3490 | 11.5551582363 |               |
| NM_001007561 | IRGQ 2012  | 2076 | 11.5549847219 |               |
| NM_001007561 | IRGQ 6423  | 6501 | 9.88605676208 |               |
| NM_001007561 | IRGQ 1941  | 2009 | 9.97019597124 |               |
| NM_001007561 | IRGQ 3881  | 3922 | 11.551140872  |               |
| NM_001007561 | IRGQ 963   | 1005 | 11.5549847219 |               |
| NM_001007561 | IRGQ 2867  | 2910 | 11.5549847219 |               |
| NM_001007561 | IRGQ 86    | 195  | 12.5551584722 |               |
| NM_001007561 | IRGQ 4313  | 4414 | 9.97019597147 |               |
| NM_001007561 | IRGQ 4100  | 4224 | 10.9701959715 |               |
| NM_001007561 | IRGQ 7089  | 7137 | 9.97002222115 |               |
| NM_001007561 | IRGQ 1624  | 1740 | 9.97019597147 |               |
| NM_001007561 | IRGQ 2080  | 2209 | 11.9701959715 |               |
| NM_001007561 | IRGQ 6713  | 6820 | 12.2921240664 |               |
| NM_001007561 | IRGQ 5356  | 5431 | 9.97019597146 |               |
| NM_001007561 | IRGQ 543   | 644  | 9.97019597147 |               |
| NM_006429    | CCT7 1515  | 1556 | 1.41975441356 |               |
| NM_006429    | CCT7 432   | 478  | 1.50389338702 |               |
| NM_006429    | CCT7 1558  | 1766 | 5.96332524158 |               |

|           |         |      |      |                |
|-----------|---------|------|------|----------------|
| NM_006429 | CCT7    | 1787 | 1848 | 3.50389362294  |
| NM_006429 | CCT7    | 1278 | 1451 | 4.82582171783  |
| NM_006429 | CCT7    | 1059 | 1177 | 4.50389362294  |
| NM_006429 | CCT7    | 144  | 413  | 5.75182113638  |
| NM_006429 | CCT7    | 490  | 1028 | 6.99574671927  |
| NM_006428 | MRPL28  | 89   | 126  | 6.49931845461  |
| NM_006428 | MRPL28  | 391  | 495  | 8.08445470565  |
| NM_003143 | SSBP1   | 630  | 685  | 6.06843826366  |
| NM_003143 | SSBP1   | 529  | 601  | 7.39054010887  |
| NM_003143 | SSBP1   | 387  | 433  | 6.06861177806  |
| NM_003143 | SSBP1   | 489  | 525  | 4.98447280459  |
| NM_003143 | SSBP1   | 167  | 289  | 8.39054010887  |
| NM_003143 | SSBP1   | 36   | 156  | 8.23853701542  |
| NM_003142 | SSB     | 106  | 169  | 2.2824170335   |
| NM_003142 | SSB     | 1553 | 1594 | 1.69745452523  |
| NM_003142 | SSB     | 857  | 920  | 0.697454296858 |
| NM_003142 | SSB     | 660  | 757  | 2.2824170335   |
| NM_003142 | SSB     | 1101 | 1193 | 0.697454525228 |
| NM_003142 | SSB     | 172  | 236  | 0.693436932604 |
| NM_003142 | SSB     | 1251 | 1370 | 0.697454532777 |
| NM_003142 | SSB     | 241  | 450  | 4.15688615141  |
| NM_003142 | SSB     | 452  | 578  | 3.86737953422  |
| NM_006421 | ARFGEF1 | 3796 | 3861 | 7.17835060122  |
| NM_006421 | ARFGEF1 | 4678 | 4716 | 6.67350970971  |
| NM_006421 | ARFGEF1 | 5814 | 5858 | 7.17835060122  |
| NM_006421 | ARFGEF1 | 3743 | 3783 | 5.67350970971  |
| NM_006421 | ARFGEF1 | 2055 | 2114 | 6.67350970971  |
| NM_006421 | ARFGEF1 | 4108 | 4161 | 5.67350970971  |
| NM_006421 | ARFGEF1 | 4197 | 4262 | 7.26248307955  |
| NM_006420 | ARFGEF2 | 1394 | 1451 | 4.61205562647  |
| NM_006420 | ARFGEF2 | 3409 | 3473 | 6.93399045241  |
| NM_006420 | ARFGEF2 | 1466 | 1537 | 7.41941727958  |
| NM_006420 | ARFGEF2 | 5378 | 5413 | 5.61205562647  |
| NM_006420 | ARFGEF2 | 5750 | 5799 | 4.60804475735  |
| NM_006420 | ARFGEF2 | 698  | 749  | 4.6120623573   |
| NM_006420 | ARFGEF2 | 4647 | 4696 | 6.11288564886  |
| NM_006420 | ARFGEF2 | 562  | 597  | 5.52792314814  |
| NM_006420 | ARFGEF2 | 6634 | 6706 | 6.19685110793  |
| NM_006420 | ARFGEF2 | 8024 | 8077 | 4.61188860721  |
| NM_006420 | ARFGEF2 | 4283 | 4356 | 4.61206235752  |
| NM_006420 | ARFGEF2 | 1203 | 1242 | 5.52792314814  |
| NM_006420 | ARFGEF2 | 8445 | 8518 | 4.61206212161  |
| NM_006420 | ARFGEF2 | 1931 | 2006 | 4.60804475735  |
| NM_006420 | ARFGEF2 | 489  | 553  | 5.60804475735  |
| NM_006420 | ARFGEF2 | 3272 | 3403 | 6.61206235752  |
| NM_006420 | ARFGEF2 | 1641 | 1718 | 6.1970248507   |
| NM_006420 | ARFGEF2 | 4022 | 4082 | 6.19701812719  |
| NM_003146 | SSRP1   | 135  | 174  | 3.13818843355  |
| NM_003146 | SSRP1   | 2373 | 2430 | 4.72332468437  |
| NM_003146 | SSRP1   | 2640 | 2704 | 4.13835545281  |

|           |       |      |      |                |
|-----------|-------|------|------|----------------|
| NM_003146 | SSRP1 | 680  | 741  | 4.13835545281  |
| NM_003146 | SSRP1 | 1710 | 1750 | 3.1343445837   |
| NM_003146 | SSRP1 | 1286 | 1472 | 7.22582502512  |
| NM_003146 | SSRP1 | 2741 | 2823 | 5.13836218387  |
| NM_003146 | SSRP1 | 1047 | 1238 | 6.46029027876  |
| NM_003146 | SSRP1 | 2036 | 2095 | 3.13835545281  |
| NM_003146 | SSRP1 | 1540 | 1617 | 5.13836218387  |
| NM_003146 | SSRP1 | 859  | 1044 | 7.22582502512  |
| NM_003146 | SSRP1 | 2446 | 2639 | 6.13836218387  |
| NM_003146 | SSRP1 | 407  | 653  | 6.46029027876  |
| NM_003146 | SSRP1 | 2260 | 2344 | 3.13836218387  |
| NM_003146 | SSRP1 | 251  | 369  | 5.13836218387  |
| NM_003146 | SSRP1 | 769  | 843  | 3.13836218365  |
| NM_003145 | SSR2  | 24   | 129  | 6.47664715832  |
| NM_003145 | SSR2  | 716  | 826  | 5.99122033115  |
| NM_003145 | SSR2  | 842  | 1083 | 7.31314842603  |
| NM_003145 | SSR2  | 139  | 715  | 9.17708687646  |
| NM_003144 | SSR1  | 2857 | 2936 | 1.99459054     |
| NM_003144 | SSR1  | 8539 | 8673 | 4.58357064089  |
| NM_003144 | SSR1  | 4153 | 4188 | 0.994590539996 |
| NM_003144 | SSR1  | 2212 | 2268 | 2.99843438985  |
| NM_003144 | SSR1  | 9500 | 9566 | 1.99860790425  |
| NM_003144 | SSR1  | 9400 | 9443 | 1.99860790425  |
| NM_003144 | SSR1  | 766  | 990  | 6.39092556295  |
| NM_003144 | SSR1  | 1760 | 1828 | 2.58357064089  |
| NM_003144 | SSR1  | 2752 | 2786 | 1.91446893078  |
| NM_003144 | SSR1  | 1419 | 1485 | 1.99860814016  |
| NM_003144 | SSR1  | 1604 | 1733 | 4.16853314161  |
| NM_003144 | SSR1  | 7867 | 7924 | 0.914468930785 |
| NM_003144 | SSR1  | 2982 | 3052 | 0.998608140169 |
| NM_003144 | SSR1  | 474  | 763  | 7.06469733063  |
| NM_003144 | SSR1  | 3164 | 3200 | 1.99860813262  |
| NM_003144 | SSR1  | 1509 | 1561 | 0.998434389851 |
| NM_003144 | SSR1  | 4547 | 4610 | 2.58339689057  |
| NM_003144 | SSR1  | 139  | 468  | 6.61331798428  |
| NM_003144 | SSR1  | 2466 | 2521 | 1.91446893078  |
| NM_003144 | SSR1  | 1251 | 1403 | 5.32053623506  |
| NM_003144 | SSR1  | 3249 | 3327 | 3.58357064089  |
| NM_003144 | SSR1  | 2805 | 2856 | 0.994590539996 |
| NM_003144 | SSR1  | 2054 | 2163 | 3.80596306223  |
| NM_003144 | SSR1  | 8761 | 8852 | 3.32053623506  |
| NM_003144 | SSR1  | 8343 | 8460 | 2.99860814016  |
| NM_003144 | SSR1  | 1000 | 1226 | 6.28401035903  |
| NM_003144 | SSR1  | 2585 | 2663 | 1.99860790425  |
| NM_003144 | SSR1  | 9445 | 9495 | 0.994590539996 |
| NM_003144 | SSR1  | 2316 | 2424 | 3.58357064089  |
| NM_003144 | SSR1  | 5658 | 5804 | 3.32053623506  |
| NM_003144 | SSR1  | 1958 | 2041 | 1.99860814017  |
| NM_003144 | SSR1  | 5420 | 5492 | 0.998608140163 |
| NM_003144 | SSR1  | 4008 | 4085 | 0.998608139946 |

|              |          |      |      |               |
|--------------|----------|------|------|---------------|
| NM_001128854 | SRRT     | 2343 | 2433 | 6.38441908137 |
| NM_001128854 | SRRT     | 2238 | 2286 | 5.3804014812  |
| NM_001128854 | SRRT     | 1915 | 1966 | 5.38441908137 |
| NM_001128854 | SRRT     | 254  | 349  | 7.96938158209 |
| NM_001128854 | SRRT     | 1636 | 1791 | 8.70634717626 |
| NM_001128854 | SRRT     | 2592 | 2626 | 5.38441884545 |
| NM_001128854 | SRRT     | 946  | 993  | 6.38441908137 |
| NM_001128854 | SRRT     | 73   | 187  | 8.19177400343 |
| NM_001128854 | SRRT     | 490  | 541  | 5.38441908137 |
| NM_001128854 | SRRT     | 1498 | 1542 | 6.96937485104 |
| NM_001128854 | SRRT     | 996  | 1052 | 5.38424533105 |
| NM_001128854 | SRRT     | 2814 | 2977 | 9.77673650415 |
| NM_001128854 | SRRT     | 1298 | 1403 | 5.38441908137 |
| NM_001128854 | SRRT     | 355  | 490  | 8.19177400343 |
| NM_001128854 | SRRT     | 1801 | 1907 | 6.96938158209 |
| NM_001128854 | SRRT     | 2042 | 2174 | 8.70634717626 |
| NM_001128854 | SRRT     | 675  | 838  | 6.96938158209 |
| NM_001128854 | SRRT     | 2745 | 2806 | 6.3804014812  |
| NM_002898    | RBMS2    | 4827 | 4898 | 7.42607347919 |
| NM_002894    | RBBP8    | 1766 | 1829 | 5.13843621706 |
| NM_002894    | RBBP8    | 592  | 639  | 5.05831460785 |
| NM_002893    | RBBP7    | 1153 | 1239 | 7.08524420137 |
| NM_002893    | RBBP7    | 487  | 532  | 6.50010795034 |
| NM_002893    | RBBP7    | 1379 | 1456 | 6.08524420137 |
| NM_002893    | RBBP7    | 1531 | 1578 | 5.50010795034 |
| NM_002893    | RBBP7    | 1034 | 1140 | 7.82220979554 |
| NM_002893    | RBBP7    | 215  | 305  | 6.08524420137 |
| NM_002893    | RBBP7    | 892  | 1021 | 7.30763662271 |
| NM_002893    | RBBP7    | 354  | 430  | 6.08524420137 |
| NM_002893    | RBBP7    | 550  | 624  | 6.08524420137 |
| NM_002893    | RBBP7    | 792  | 870  | 4.50028170065 |
| NM_002893    | RBBP7    | 1239 | 1309 | 5.50028170065 |
| NM_002893    | RBBP7    | 1874 | 1938 | 6.08524420137 |
| NM_002893    | RBBP7    | 1582 | 1842 | 8.95971331929 |
| NM_002893    | RBBP7    | 648  | 783  | 7.08524420137 |
| NM_002890    | RASA1    | 654  | 690  | 6.09135765538 |
| NM_181725    | METTTL2A | 390  | 434  | 6.04089587456 |
| NM_181725    | METTTL2A | 277  | 384  | 8.62585838283 |
| NM_181725    | METTTL2A | 655  | 741  | 8.62585838283 |
| NM_181725    | METTTL2A | 912  | 987  | 8.36282374107 |
| NM_181725    | METTTL2A | 998  | 1117 | 8.36282397699 |
| NM_181725    | METTTL2A | 486  | 654  | 9.50032750074 |
| NM_153232    | EID2     | 738  | 821  | 9.90930559884 |
| NM_001813    | CENPE    | 6530 | 6609 | 7.56752247944 |
| NM_001813    | CENPE    | 1585 | 1653 | 6.56351161032 |
| NM_001813    | CENPE    | 3237 | 3290 | 6.48339000111 |
| NM_001813    | CENPE    | 3132 | 3185 | 6.56351161032 |
| NM_001813    | CENPE    | 2922 | 2981 | 7.56735546018 |
| NM_130809    | PRRC1    | 1199 | 1244 | 6.99335903167 |
| NM_130809    | PRRC1    | 909  | 969  | 5.98951518181 |

|              |         |      |      |               |
|--------------|---------|------|------|---------------|
| NM_130809    | PRRC1   | 4452 | 4524 | 6.99352605093 |
| NM_130809    | PRRC1   | 1089 | 1168 | 6.99352605093 |
| NM_130809    | PRRC1   | 3963 | 4036 | 6.99352605093 |
| NM_130809    | PRRC1   | 469  | 569  | 8.80088770404 |
| NM_130809    | PRRC1   | 711  | 789  | 5.98951518181 |
| NM_130809    | PRRC1   | 398  | 465  | 5.99352605093 |
| NM_130809    | PRRC1   | 211  | 316  | 6.99353278198 |
| NM_130809    | PRRC1   | 3828 | 3889 | 6.99335903167 |
| NM_018429    | BDP1    | 9355 | 9404 | 6.03156595392 |
| NM_001040454 | SLC26A6 | 2220 | 2265 | 6.43462493913 |
| NM_001040454 | SLC26A6 | 884  | 955  | 5.43461820808 |
| NM_001040454 | SLC26A6 | 1205 | 1279 | 6.01556983968 |
| NM_001040454 | SLC26A6 | 2018 | 2103 | 4.43462493158 |
| NM_001040454 | SLC26A6 | 1747 | 1807 | 5.43462493913 |
| NM_001040454 | SLC26A6 | 1468 | 1562 | 4.43462493913 |
| NM_001040454 | SLC26A6 | 783  | 874  | 6.75655303401 |
| NM_001040454 | SLC26A6 | 382  | 477  | 7.01958743985 |
| NM_001040454 | SLC26A6 | 1567 | 1640 | 4.43461820808 |
| NM_001040454 | SLC26A6 | 1643 | 1731 | 6.43462470321 |
| NM_001040454 | SLC26A6 | 527  | 661  | 6.43462493913 |
| NM_001040456 | RHBDD2  | 1394 | 1475 | 10.0260741496 |
| NM_001040456 | RHBDD2  | 1600 | 1648 | 10.026074142  |
| NM_001040456 | RHBDD2  | 1481 | 1583 | 12.195999151  |
| NM_001040456 | RHBDD2  | 579  | 709  | 12.195999151  |
| NM_001040456 | RHBDD2  | 1197 | 1341 | 12.4855057682 |
| NM_001040456 | RHBDD2  | 1049 | 1126 | 10.6110366503 |
| NM_001040456 | RHBDD2  | 283  | 482  | 13.6110366503 |
| NM_001040456 | RHBDD2  | 709  | 840  | 9.02607414957 |
| NM_001040456 | RHBDD2  | 146  | 258  | 11.8334290716 |
| NM_001040456 | RHBDD2  | 961  | 1039 | 9.02607414957 |
| NM_001810    | CENPB   | 511  | 595  | 5.49995367045 |
| NM_001810    | CENPB   | 750  | 818  | 4.49995367045 |
| NM_001810    | CENPB   | 1983 | 2028 | 4.49593607028 |
| NM_001810    | CENPB   | 421  | 466  | 5.49593607028 |
| NM_001810    | CENPB   | 1705 | 1753 | 6.49995367045 |
| NM_001810    | CENPB   | 1757 | 1844 | 6.08491617117 |
| NM_001810    | CENPB   | 1304 | 1393 | 6.08491617117 |
| NM_001810    | CENPB   | 2499 | 2609 | 6.82188176534 |
| NM_001810    | CENPB   | 1034 | 1075 | 4.49593607028 |
| NM_001810    | CENPB   | 1893 | 1974 | 5.4999469394  |
| NM_001810    | CENPB   | 309  | 393  | 5.49995367045 |
| NM_001040452 | RUFY1   | 2121 | 2213 | 6.24356008207 |
| NM_004925    | AQP3    | 773  | 834  | 9.50944544787 |
| NM_004925    | AQP3    | 200  | 256  | 9.5094454481  |
| NM_004925    | AQP3    | 423  | 472  | 8.92448294737 |
| NM_004925    | AQP3    | 1479 | 1525 | 7.92430919706 |
| NM_004925    | AQP3    | 1769 | 1838 | 9.42530623871 |
| NM_004925    | AQP3    | 612  | 646  | 9.92430919706 |
| NM_004925    | AQP3    | 717  | 772  | 7.92448293982 |
| NM_004925    | AQP3    | 1079 | 1166 | 7.92448293982 |

|              |          |      |      |               |
|--------------|----------|------|------|---------------|
| NM_004925    | AQP3     | 1580 | 1645 | 9.5094454481  |
| NM_004925    | AQP3     | 489  | 604  | 10.7318378694 |
| NM_004925    | AQP3     | 277  | 407  | 10.7318378694 |
| NM_004925    | AQP3     | 1330 | 1385 | 7.84034373799 |
| NM_004925    | AQP3     | 877  | 1011 | 8.92448294737 |
| NM_001127350 | MED18    | 902  | 982  | 8.14269346171 |
| NM_002096    | GTF2F1   | 489  | 537  | 6.00331165926 |
| NM_002096    | GTF2F1   | 1664 | 1724 | 6.00331815439 |
| NM_002096    | GTF2F1   | 1729 | 1789 | 4.41834915853 |
| NM_002096    | GTF2F1   | 312  | 353  | 6.00331839009 |
| NM_002096    | GTF2F1   | 2081 | 2177 | 5.41835588959 |
| NM_002096    | GTF2F1   | 813  | 858  | 5.3342166802  |
| NM_002096    | GTF2F1   | 1851 | 1901 | 4.41834915853 |
| NM_002096    | GTF2F1   | 1902 | 2044 | 6.41835588959 |
| NM_002096    | GTF2F1   | 203  | 277  | 4.41433828942 |
| NM_002097    | GTF3A    | 770  | 822  | 4.8242562834  |
| NM_002097    | GTF3A    | 1024 | 1081 | 4.32325924175 |
| NM_002097    | GTF3A    | 923  | 989  | 3.32342626101 |
| NM_002097    | GTF3A    | 396  | 472  | 4.90839549256 |
| NM_002095    | GTF2E2   | 572  | 622  | 3.81805857161 |
| NM_002095    | GTF2E2   | 250  | 314  | 4.48314268154 |
| NM_002095    | GTF2E2   | 901  | 975  | 4.48314268154 |
| NM_002095    | GTF2E2   | 372  | 432  | 2.90219778077 |
| NM_002095    | GTF2E2   | 1123 | 1244 | 3.90219104994 |
| NM_002092    | GRSF1    | 1352 | 1392 | 6.05918220084 |
| NM_002092    | GRSF1    | 1900 | 1957 | 5.0591821933  |
| NM_002092    | GRSF1    | 855  | 916  | 6.05918220085 |
| NM_002092    | GRSF1    | 1145 | 1180 | 4.97504299146 |
| NM_002092    | GRSF1    | 1392 | 1444 | 4.05917546979 |
| NM_002092    | GRSF1    | 162  | 223  | 5.64414470134 |
| NM_002092    | GRSF1    | 2483 | 2531 | 4.05918220084 |
| NM_002092    | GRSF1    | 1665 | 1710 | 4.05516460067 |
| NM_002092    | GRSF1    | 1459 | 1611 | 7.38111029573 |
| NM_002092    | GRSF1    | 731  | 855  | 6.38111029573 |
| NM_002092    | GRSF1    | 3136 | 3214 | 5.05918196493 |
| NM_002092    | GRSF1    | 2289 | 2363 | 5.05516460067 |
| NM_002092    | GRSF1    | 507  | 718  | 8.22910720229 |
| NM_002092    | GRSF1    | 1192 | 1302 | 6.8665371229  |
| NM_014033    | METTTL7A | 995  | 1067 | 5.62777205375 |
| NM_014033    | METTTL7A | 1821 | 1871 | 4.04280282198 |
| NM_014033    | METTTL7A | 60   | 127  | 4.03879195286 |
| NM_014033    | METTTL7A | 177  | 211  | 5.6277653227  |
| NM_014033    | METTTL7A | 2646 | 2693 | 4.04280955303 |
| NM_014033    | METTTL7A | 3146 | 3211 | 5.62777181783 |
| NM_014033    | METTTL7A | 230  | 400  | 8.62777205375 |
| NM_014033    | METTTL7A | 2703 | 2826 | 5.04280955303 |
| NM_014033    | METTTL7A | 1317 | 1392 | 4.04280955303 |
| NM_014033    | METTTL7A | 411  | 514  | 5.62777205375 |
| NM_014033    | METTTL7A | 2967 | 3045 | 4.04280955303 |
| NM_014033    | METTTL7A | 585  | 933  | 9.17209256998 |

|              |            |      |      |               |               |
|--------------|------------|------|------|---------------|---------------|
| NM_014030    | GIT1       | 1219 | 1257 | 7.34569100602 |               |
| NM_014030    | GIT1       | 838  | 932  | 6.34569124194 |               |
| NM_014030    | GIT1       | 1737 | 1787 | 6.26155203256 |               |
| NM_014030    | GIT1       | 1454 | 1501 | 8.26155203256 |               |
| NM_014030    | GIT1       | 1030 | 1092 | 7.93065374266 |               |
| NM_014030    | GIT1       | 620  | 675  | 6.34569100602 |               |
| NM_014030    | GIT1       | 2216 | 2315 | 7.34569100602 |               |
| NM_014030    | GIT1       | 286  | 353  | 6.34569100602 |               |
| NM_130801    | MEN1       | 609  | 681  | 8.14404160683 |               |
| NM_130801    | MEN1       | 2023 | 2158 | 7.14421535715 |               |
| NM_130801    | MEN1       | 154  | 234  | 8.72917785765 |               |
| NM_130801    | MEN1       | 789  | 849  | 8.14019775698 |               |
| NM_014034    | ASF1A      | 456  | 536  | 3.84699040426 |               |
| NM_014034    | ASF1A      | 573  | 654  | 4.84297953514 |               |
| NM_014039    | C11orf54   |      | 129  | 213           | 6.3947421343  |
| NM_014039    | C11orf54   |      | 253  | 305           | 5.31060292492 |
| NM_014039    | C11orf54   |      | 540  | 610           | 5.31060292492 |
| NM_014039    | C11orf54   |      | 735  | 787           | 5.97970462747 |
| NM_014039    | C11orf54   |      | 939  | 988           | 5.31060292492 |
| NM_014039    | C11orf54   |      | 319  | 509           | 7.3947421343  |
| NM_014038    | BZW2       | 464  | 522  | 5.64599856362 |               |
| NM_014038    | BZW2       | 102  | 168  | 5.64600529467 |               |
| NM_014038    | BZW2       | 1716 | 1754 | 5.0610360629  |               |
| NM_014038    | BZW2       | 194  | 255  | 4.06104279395 |               |
| NM_014038    | BZW2       | 1440 | 1519 | 6.06104279395 |               |
| NM_014038    | BZW2       | 1757 | 1832 | 5.06104279394 |               |
| NM_014038    | BZW2       | 726  | 922  | 8.23096779539 |               |
| NM_014038    | BZW2       | 922  | 1019 | 7.06104279395 |               |
| NM_014038    | BZW2       | 1570 | 1650 | 5.64600529467 |               |
| NM_014038    | BZW2       | 1368 | 1429 | 5.06104279395 |               |
| NM_014038    | BZW2       | 1651 | 1713 | 6.64600529467 |               |
| NM_014038    | BZW2       | 1021 | 1132 | 7.86839771601 |               |
| NM_014038    | BZW2       | 1192 | 1300 | 7.38297088884 |               |
| NM_014038    | BZW2       | 256  | 463  | 8.45336021673 |               |
| NM_014038    | BZW2       | 528  | 665  | 6.86839771601 |               |
| NM_018590    | CSGALNACT2 |      | 3460 | 3505          | 6.79220718144 |
| NM_001145961 | SLC12A4    | 2920 | 2962 | 6.73126774455 |               |
| NM_001145961 | SLC12A4    | 2096 | 2170 | 6.73126101372 |               |
| NM_001145961 | SLC12A4    | 1402 | 1485 | 7.73126774477 |               |
| NM_001145961 | SLC12A4    | 594  | 658  | 7.73126774477 |               |
| NM_001145961 | SLC12A4    | 2215 | 2297 | 6.73126774455 |               |
| NM_001145961 | SLC12A4    | 1100 | 1150 | 6.73126774455 |               |
| NM_001145961 | SLC12A4    | 2650 | 2711 | 7.31622351444 |               |
| NM_001145961 | SLC12A4    | 843  | 929  | 7.73126774477 |               |
| NM_001145961 | SLC12A4    | 956  | 1026 | 7.3162302455  |               |
| NM_001145961 | SLC12A4    | 237  | 290  | 5.73126774455 |               |
| NM_001145961 | SLC12A4    | 1803 | 1853 | 5.73126101372 |               |
| NM_001145961 | SLC12A4    | 2862 | 2909 | 7.31221264532 |               |
| NM_001145961 | SLC12A4    | 2982 | 3125 | 7.73126774477 |               |
| NM_001145961 | SLC12A4    | 1523 | 1629 | 8.90119274622 |               |



|              |         |       |       |               |
|--------------|---------|-------|-------|---------------|
| NM_001145961 | SLC12A4 | 1654  | 1708  | 7.3162302455  |
| NM_001145961 | SLC12A4 | 1883  | 2066  | 8.90119274622 |
| NM_001145961 | SLC12A4 | 668   | 771   | 8.73126774477 |
| NM_001145961 | SLC12A4 | 2480  | 2589  | 7.3162302455  |
| NM_001145961 | SLC12A4 | 1174  | 1316  | 8.3162302455  |
| NM_001145961 | SLC12A4 | 2377  | 2431  | 5.73109399446 |
| NM_001145961 | SLC12A4 | 296   | 420   | 7.73126774477 |
| NM_018221    | MOB1A   | 758   | 815   | 5.80972408946 |
| NM_018221    | MOB1A   | 650   | 729   | 3.4837783944  |
| NM_018221    | MOB1A   | 267   | 476   | 6.48779599458 |
| NM_018226    | RNPEPL1 | 1336  | 1396  | 6.85781070638 |
| NM_018226    | RNPEPL1 | 1473  | 1531  | 5.85763719198 |
| NM_018226    | RNPEPL1 | 1762  | 1818  | 7.44277343547 |
| NM_018226    | RNPEPL1 | 1161  | 1220  | 7.44276671196 |
| NM_018226    | RNPEPL1 | 2425  | 2465  | 5.77367173291 |
| NM_001008895 | CUL4A   | 2755  | 2825  | 5.33887846065 |
| NM_001008895 | CUL4A   | 2728  | 2752  | 4.67379435072 |
| NM_001008895 | CUL4A   | 3055  | 3152  | 5.3428960606  |
| NM_001008895 | CUL4A   | 1796  | 1893  | 3.7579335601  |
| NM_001008895 | CUL4A   | 2350  | 2438  | 4.75793355255 |
| NM_001008895 | CUL4A   | 1114  | 1198  | 5.34289606082 |
| NM_001008895 | CUL4A   | 1453  | 1531  | 3.75792682905 |
| NM_001008895 | CUL4A   | 3524  | 3579  | 3.67379435072 |
| NM_001008895 | CUL4A   | 944   | 1025  | 4.75793355255 |
| NM_001008895 | CUL4A   | 2545  | 2581  | 4.75792682905 |
| NM_001008895 | CUL4A   | 2463  | 2527  | 6.56528848216 |
| NM_001008895 | CUL4A   | 241   | 315   | 3.75793355988 |
| NM_001008895 | CUL4A   | 1314  | 1361  | 3.67379435072 |
| NM_001008895 | CUL4A   | 2239  | 2288  | 4.75775980978 |
| NM_001008895 | CUL4A   | 2964  | 3035  | 3.75775980978 |
| NM_001008895 | CUL4A   | 1203  | 1311  | 5.34289606082 |
| NM_001008895 | CUL4A   | 2596  | 2678  | 6.34289606082 |
| NM_001008895 | CUL4A   | 2085  | 2177  | 4.75793355255 |
| NM_001008895 | CUL4A   | 363   | 468   | 5.7579335601  |
| NM_001008895 | CUL4A   | 711   | 844   | 5.34289606082 |
| NM_001008895 | CUL4A   | 485   | 686   | 6.56528848216 |
| NM_001008895 | CUL4A   | 1664  | 1726  | 4.7579335601  |
| NM_001008895 | CUL4A   | 3393  | 3464  | 3.75793332418 |
| NM_001145966 | MKI67   | 4360  | 4423  | 5.53828392755 |
| NM_001145966 | MKI67   | 7995  | 8084  | 6.12324666419 |
| NM_001145966 | MKI67   | 10491 | 10558 | 4.5342665633  |
| NM_001145966 | MKI67   | 10993 | 11046 | 6.12324665664 |
| NM_001145966 | MKI67   | 5846  | 5924  | 5.53828416346 |
| NM_001145966 | MKI67   | 9510  | 9557  | 6.12323993314 |
| NM_001145966 | MKI67   | 2539  | 2611  | 6.53828416347 |
| NM_001145966 | MKI67   | 9822  | 9966  | 7.34563908553 |
| NM_001145966 | MKI67   | 3793  | 3847  | 4.53827743242 |
| NM_001145966 | MKI67   | 9668  | 9711  | 4.53827743242 |
| NM_001145966 | MKI67   | 3066  | 3122  | 6.12324666419 |
| NM_001145966 | MKI67   | 7534  | 7615  | 5.53828416347 |

|              |       |       |       |               |
|--------------|-------|-------|-------|---------------|
| NM_001145966 | MKI67 | 794   | 832   | 6.03910745481 |
| NM_001145966 | MKI67 | 6490  | 6546  | 5.53828415592 |
| NM_001145966 | MKI67 | 6230  | 6286  | 5.53828416346 |
| NM_001145966 | MKI67 | 7733  | 7821  | 5.53828415592 |
| NM_001145966 | MKI67 | 7274  | 7307  | 4.5342665633  |
| NM_001145966 | MKI67 | 9750  | 9811  | 6.12324642827 |
| NM_001145966 | MKI67 | 3999  | 4053  | 5.53828392755 |
| NM_001145966 | MKI67 | 4959  | 5006  | 4.53828392755 |
| NM_001145966 | MKI67 | 3149  | 3212  | 6.12324642827 |
| NM_001145966 | MKI67 | 1055  | 1128  | 7.34563908553 |
| NM_001145966 | MKI67 | 9248  | 9354  | 6.53828416347 |
| NM_001145966 | MKI67 | 2926  | 2984  | 6.12324666397 |
| NM_001145966 | MKI67 | 1143  | 1210  | 4.53828416347 |
| NM_001145966 | MKI67 | 10674 | 10722 | 6.11922906402 |
| NM_001145966 | MKI67 | 8401  | 8454  | 4.45414495409 |
| NM_001145966 | MKI67 | 7623  | 7706  | 5.53828416346 |
| NM_001145966 | MKI67 | 7331  | 7452  | 4.53828416347 |
| NM_001145966 | MKI67 | 8220  | 8398  | 7.12324666419 |
| NM_001145966 | MKI67 | 3421  | 3461  | 4.45414495409 |
| NM_001145966 | MKI67 | 2382  | 2461  | 5.53828416347 |
| NM_001145966 | MKI67 | 32    | 233   | 8.53828416347 |
| NM_001145966 | MKI67 | 6050  | 6171  | 5.53828416347 |
| NM_001145966 | MKI67 | 1476  | 1552  | 6.86021225836 |
| NM_001145966 | MKI67 | 11226 | 11272 | 5.53828392755 |
| NM_001145966 | MKI67 | 5930  | 5991  | 4.5342665633  |
| NM_001145966 | MKI67 | 402   | 521   | 7.70820916491 |
| NM_001145966 | MKI67 | 2327  | 2380  | 5.53828416347 |
| NM_001145966 | MKI67 | 1993  | 2080  | 6.86021225836 |
| NM_001145966 | MKI67 | 1566  | 1637  | 6.12324666419 |
| NM_001145966 | MKI67 | 1821  | 1980  | 6.12324666419 |
| NM_001145966 | MKI67 | 3755  | 3792  | 4.5342665633  |
| NM_001145966 | MKI67 | 5080  | 5155  | 5.53811041315 |
| NM_001145966 | MKI67 | 4194  | 4319  | 6.86021225836 |
| NM_001145966 | MKI67 | 7853  | 7929  | 5.53828416325 |
| NM_001145966 | MKI67 | 4498  | 4751  | 7.34563908553 |
| NM_001145966 | MKI67 | 3508  | 3625  | 6.12324666419 |
| NM_001145966 | MKI67 | 11072 | 11151 | 5.5342665633  |
| NM_001145966 | MKI67 | 2794  | 2845  | 6.12323993314 |
| NM_001145966 | MKI67 | 8948  | 9111  | 7.34563908553 |
| NM_001145966 | MKI67 | 551   | 755   | 8.12324666419 |
| NM_001145966 | MKI67 | 5326  | 5475  | 7.12324666419 |
| NM_001145966 | MKI67 | 6320  | 6368  | 5.53828392755 |
| NM_001145966 | MKI67 | 3867  | 3960  | 5.53828416347 |
| NM_001145966 | MKI67 | 1656  | 1812  | 6.86021225836 |
| NM_001145966 | MKI67 | 2848  | 2917  | 4.53828392755 |
| NM_001145966 | MKI67 | 5549  | 5803  | 6.86021225836 |
| NM_001145966 | MKI67 | 9384  | 9510  | 6.53828416347 |
| NM_001145966 | MKI67 | 6748  | 6822  | 4.53828416347 |
| NM_001145966 | MKI67 | 7121  | 7231  | 5.53828416346 |
| NM_001145966 | MKI67 | 3649  | 3728  | 5.53828416347 |

|              |         |      |      |               |
|--------------|---------|------|------|---------------|
| NM_001145966 | MKI67   | 8745 | 8932 | 6.86021225836 |
| NM_001145966 | MKI67   | 2195 | 2266 | 5.53828416346 |
| NM_018225    | SMU1    | 336  | 387  | 6.60278370243 |
| NM_018225    | SMU1    | 539  | 614  | 7.18373533403 |
| NM_018225    | SMU1    | 971  | 1007 | 5.5186512241  |
| NM_018225    | SMU1    | 879  | 920  | 6.60279019757 |
| NM_018225    | SMU1    | 1114 | 1156 | 6.59877283331 |
| NM_018225    | SMU1    | 2197 | 2264 | 5.60279043349 |
| NM_018225    | SMU1    | 1720 | 1783 | 7.60278370243 |
| NM_018225    | SMU1    | 1906 | 1958 | 5.60278370243 |
| NM_018225    | SMU1    | 1064 | 1114 | 7.10361372482 |
| NM_018225    | SMU1    | 1193 | 1287 | 8.18775293421 |
| NM_018225    | SMU1    | 1299 | 1354 | 7.60261668317 |
| NM_018225    | SMU1    | 1963 | 2044 | 7.18774620315 |
| NM_018225    | SMU1    | 1364 | 1644 | 9.41014535554 |
| NM_018225    | SMU1    | 726  | 845  | 7.60279043349 |
| NM_018225    | SMU1    | 77   | 336  | 9.06222205212 |
| NM_015348    | TMEM131 | 5386 | 5434 | 5.91341657545 |
| NM_015348    | TMEM131 | 5440 | 5501 | 7.50239644042 |
| NM_015348    | TMEM131 | 3460 | 3555 | 7.50239667612 |
| NM_015348    | TMEM131 | 1869 | 1903 | 6.91341657545 |
| NM_015348    | TMEM131 | 2165 | 2212 | 6.91742744457 |
| NM_015348    | TMEM131 | 4932 | 4989 | 7.50238994529 |
| NM_015348    | TMEM131 | 2432 | 2478 | 6.91341657545 |
| NM_015348    | TMEM131 | 3721 | 3789 | 5.83329496624 |
| NM_015348    | TMEM131 | 2948 | 3011 | 5.91341657545 |
| NM_015348    | TMEM131 | 6316 | 6367 | 5.9172604253  |
| NM_015348    | TMEM131 | 3567 | 3643 | 8.50239667634 |
| NM_015348    | TMEM131 | 1509 | 1555 | 5.83329496624 |
| NM_015348    | TMEM131 | 6090 | 6160 | 6.91743417562 |
| NM_015348    | TMEM131 | 2775 | 2852 | 7.50239644042 |
| NM_015348    | TMEM131 | 1965 | 2060 | 7.50239667634 |
| NM_015348    | TMEM131 | 417  | 495  | 7.50239667634 |
| NM_015348    | TMEM131 | 946  | 1069 | 6.9174341754  |
| NM_002387    | MCC     | 2917 | 2937 | 11.7968163922 |
| NM_002387    | MCC     | 4614 | 4698 | 13.377935043  |
| NM_002547    | OPHN1   | 7135 | 7192 | 10.8747901863 |
| NM_002547    | OPHN1   | 7210 | 7255 | 10.8747901863 |
| NM_002547    | OPHN1   | 6880 | 6945 | 10.8747901863 |
| NM_002547    | OPHN1   | 6720 | 6789 | 9.28982768562 |
| NM_002547    | OPHN1   | 7000 | 7088 | 10.8747901863 |
| NM_002541    | OGDH    | 2426 | 2471 | 6.64600218559 |
| NM_002541    | OGDH    | 1771 | 1821 | 6.64617569999 |
| NM_002541    | OGDH    | 4151 | 4253 | 7.64616920485 |
| NM_002541    | OGDH    | 3264 | 3303 | 6.64215833573 |
| NM_002541    | OGDH    | 1315 | 1376 | 6.56203672652 |
| NM_002541    | OGDH    | 2292 | 2363 | 8.23113843663 |
| NM_002541    | OGDH    | 3037 | 3094 | 7.64215833573 |
| NM_002541    | OGDH    | 950  | 1033 | 7.64617592836 |
| NM_002541    | OGDH    | 1035 | 1193 | 10.5530665315 |

|              |         |      |      |               |
|--------------|---------|------|------|---------------|
| NM_002541    | OGDH    | 558  | 670  | 8.23113843663 |
| NM_002541    | OGDH    | 1563 | 1648 | 8.96810403079 |
| NM_002541    | OGDH    | 1827 | 1948 | 9.81610093735 |
| NM_002541    | OGDH    | 133  | 373  | 11.169737892  |
| NM_002541    | OGDH    | 1377 | 1508 | 9.23113843663 |
| NM_002541    | OGDH    | 1959 | 2207 | 11.1056075545 |
| NM_002541    | OGDH    | 441  | 558  | 7.64617593591 |
| NM_002541    | OGDH    | 3958 | 4097 | 9.45353085797 |
| NM_002541    | OGDH    | 2216 | 2281 | 8.6461759359  |
| NM_002541    | OGDH    | 2624 | 2794 | 9.81610093735 |
| NM_002541    | OGDH    | 670  | 938  | 10.7336387772 |
| NM_002541    | OGDH    | 3553 | 3704 | 9.81610093735 |
| NM_002541    | OGDH    | 3151 | 3259 | 8.96810403079 |
| NM_002541    | OGDH    | 2814 | 2887 | 7.6461759359  |
| NM_002541    | OGDH    | 3328 | 3393 | 6.64215833573 |
| NM_024407    | NDUFS7  | 267  | 315  | 9.33731982604 |
| NM_024407    | NDUFS7  | 223  | 266  | 7.25318062421 |
| NM_024407    | NDUFS7  | 323  | 366  | 7.33330223342 |
| NM_003910    | BUD31   | 597  | 631  | 3.71477468541 |
| NM_003910    | BUD31   | 633  | 699  | 4.29991093644 |
| NM_003910    | BUD31   | 252  | 369  | 5.03687653061 |
| NM_003910    | BUD31   | 711  | 927  | 3.71494843573 |
| NM_003910    | BUD31   | 470  | 585  | 5.29991093645 |
| NM_032510    | PARD6G  | 2366 | 2443 | 9.15524634428 |
| NM_002833    | PTPN9   | 885  | 961  | 7.01643087996 |
| NM_002833    | PTPN9   | 628  | 672  | 7.93229167058 |
| NM_002833    | PTPN9   | 1131 | 1184 | 6.93229167058 |
| NM_002833    | PTPN9   | 161  | 245  | 8.01643064405 |
| NM_002833    | PTPN9   | 2289 | 2376 | 8.01643087242 |
| NM_002833    | PTPN9   | 1765 | 1857 | 7.01241327979 |
| NM_032515    | BOK     | 1170 | 1210 | 8.02167971903 |
| NM_018046    | AGGF1   | 992  | 1070 | 5.71753594225 |
| NM_018046    | AGGF1   | 1468 | 1487 | 4.71753594225 |
| NM_018046    | AGGF1   | 66   | 118  | 4.71754243739 |
| NM_001170544 | PGAM5   | 1388 | 1441 | 6.92808127433 |
| NM_001170544 | PGAM5   | 1272 | 1340 | 6.92791425507 |
| NM_001170544 | PGAM5   | 2398 | 2472 | 7.92808800539 |
| NM_001170544 | PGAM5   | 1048 | 1122 | 8.51305050589 |
| NM_001170544 | PGAM5   | 629  | 683  | 8.42891129673 |
| NM_001170544 | PGAM5   | 914  | 971  | 8.92791425507 |
| NM_001170544 | PGAM5   | 245  | 372  | 9.51305050611 |
| NM_001170544 | PGAM5   | 389  | 537  | 9.51305050611 |
| NM_001170544 | PGAM5   | 713  | 838  | 7.92808800539 |
| NM_018045    | BSDC1   | 388  | 434  | 4.90890977769 |
| NM_018045    | BSDC1   | 2417 | 2474 | 5.99287523675 |
| NM_018045    | BSDC1   | 1191 | 1330 | 6.57801148779 |
| NM_001130031 | ZNF562  | 2208 | 2265 | 7.69453482395 |
| NM_001130031 | ZNF562  | 3482 | 3548 | 7.77867403334 |
| NM_018049    | PLEKHJ1 | 681  | 726  | 5.96280653137 |
| NM_018049    | PLEKHJ1 | 435  | 486  | 3.96280652383 |

|              |          |      |      |                    |
|--------------|----------|------|------|--------------------|
| NM_018049    | PLEKHJ1  | 1043 | 1146 | 5.5477690321       |
| NM_018049    | PLEKHJ1  | 550  | 657  | 5.5477690321       |
| NM_018049    | PLEKHJ1  | 153  | 401  | 7.66324624952      |
| NM_003916    | AP1S2    | 523  | 592  | 7.34244231178      |
| NM_003916    | AP1S2    | 594  | 701  | 8.34244231179      |
| NM_001025204 | U2AF1    | 933  | 1015 | 5.40259136851      |
| NM_001025204 | U2AF1    | 741  | 785  | 4.40241762574      |
| NM_001025204 | U2AF1    | 286  | 395  | 7.40259137606      |
| NM_001025204 | U2AF1    | 406  | 555  | 6.98755387678      |
| NM_001025204 | U2AF1    | 94   | 234  | 6.40259137606      |
| NM_001025204 | U2AF1    | 803  | 925  | 6.98755387678      |
| NM_001025204 | U2AF1    | 557  | 663  | 7.40259137606      |
| NM_001204300 | ARHGAP19 |      | 1546 | 1632 10.8077352393 |
| NM_014699    | ZNF646   | 905  | 951  | 8.01348107937      |
| NM_014698    | TMEM63A  | 412  | 495  | 7.78348507556      |
| NM_014698    | TMEM63A  | 2191 | 2224 | 8.19852257462      |
| NM_014698    | TMEM63A  | 3110 | 3151 | 6.11438336546      |
| NM_014698    | TMEM63A  | 1789 | 1856 | 7.19852257484      |
| NM_014698    | TMEM63A  | 1898 | 1948 | 7.78348506802      |
| NM_014698    | TMEM63A  | 695  | 741  | 6.19852256729      |
| NM_014698    | TMEM63A  | 893  | 946  | 7.78348507556      |
| NM_014698    | TMEM63A  | 3032 | 3079 | 6.19834882453      |
| NM_014698    | TMEM63A  | 2250 | 2308 | 8.19852257484      |
| NM_014698    | TMEM63A  | 2344 | 2421 | 7.19834882453      |
| NM_014698    | TMEM63A  | 753  | 878  | 10.0058774969      |
| NM_014698    | TMEM63A  | 1396 | 1489 | 8.19852257484      |
| NM_014698    | TMEM63A  | 2672 | 2822 | 7.78348507556      |
| NM_014698    | TMEM63A  | 2520 | 2608 | 7.19852257484      |
| NM_014698    | TMEM63A  | 1505 | 1643 | 7.19852257484      |
| NM_014698    | TMEM63A  | 2971 | 3000 | 6.11438336546      |
| NM_014698    | TMEM63A  | 1063 | 1300 | 10.4464500883      |
| NM_014698    | TMEM63A  | 1968 | 2143 | 8.52045066973      |
| NM_014691    | AQR      | 2168 | 2250 | 8.59019115834      |
| NM_014691    | AQR      | 4742 | 4818 | 8.2682630559       |
| NM_014691    | AQR      | 2087 | 2135 | 6.26808931313      |
| NM_014691    | AQR      | 3124 | 3179 | 7.2682630559       |
| NM_014691    | AQR      | 3540 | 3591 | 7.76908635479      |
| NM_014691    | AQR      | 1211 | 1269 | 8.59019092242      |
| NM_014691    | AQR      | 3750 | 3812 | 7.2682563324       |
| NM_014691    | AQR      | 1942 | 2018 | 7.26826306345      |
| NM_014691    | AQR      | 1564 | 1704 | 9.43818806489      |
| NM_014691    | AQR      | 2373 | 2420 | 6.26424546328      |
| NM_014691    | AQR      | 4072 | 4154 | 8.2682630559       |
| NM_014691    | AQR      | 1381 | 1426 | 7.18412385407      |
| NM_014691    | AQR      | 3197 | 3251 | 6.26424546328      |
| NM_080648    | APEX1    | 780  | 875  | 4.42026835428      |
| NM_080648    | APEX1    | 129  | 168  | 4.00121325483      |
| NM_080648    | APEX1    | 292  | 335  | 2.33612914489      |
| NM_080648    | APEX1    | 691  | 777  | 4.42026835428      |
| NM_080648    | APEX1    | 927  | 1260 | 6.59019335572      |

|              |          |      |      |               |               |
|--------------|----------|------|------|---------------|---------------|
| NM_080648    | APEX1    | 436  | 662  | 5.22762327633 |               |
| NM_033394    | TANC1    | 2128 | 2184 | 10.2585238746 |               |
| NM_033394    | TANC1    | 3632 | 3703 | 11.8475039752 |               |
| NM_033396    | TNKS1BP1 |      | 3821 | 3885          | 7.54097613323 |
| NM_033396    | TNKS1BP1 |      | 5578 | 5641          | 7.54097590486 |
| NM_033396    | TNKS1BP1 |      | 5500 | 5569          | 9.54097614078 |
| NM_033396    | TNKS1BP1 |      | 4186 | 4218          | 7.4568369314  |
| NM_033396    | TNKS1BP1 |      | 5292 | 5356          | 7.4568369314  |
| NM_033396    | TNKS1BP1 |      | 3983 | 4034          | 9.12576489119 |
| NM_033396    | TNKS1BP1 |      | 1046 | 1119          | 7.53695854061 |
| NM_001099415 | POM121C  | 5410 | 5528 | 9.10206357867 |               |
| NM_001099415 | POM121C  | 4990 | 5036 | 7.10206357845 |               |
| NM_001099415 | POM121C  | 4084 | 4152 | 9.68702607939 |               |
| NM_001099415 | POM121C  | 1093 | 1161 | 8.10206357867 |               |
| NM_001099415 | POM121C  | 3465 | 3508 | 7.10205684762 |               |
| NM_001099415 | POM121C  | 3586 | 3630 | 7.10206357845 |               |
| NM_001099415 | POM121C  | 5044 | 5112 | 7.10206357866 |               |
| NM_001099415 | POM121C  | 1321 | 1373 | 8.10188982835 |               |
| NM_001099415 | POM121C  | 567  | 604  | 8.01792436929 |               |
| NM_001099415 | POM121C  | 5579 | 5615 | 7.01792436929 |               |
| NM_001099415 | POM121C  | 3045 | 3121 | 8.68702607939 |               |
| NM_001099415 | POM121C  | 4853 | 4932 | 7.10206357866 |               |
| NM_001099415 | POM121C  | 1672 | 1710 | 8.10206357867 |               |
| NM_001099415 | POM121C  | 436  | 491  | 7.10206357112 |               |
| NM_001099415 | POM121C  | 1725 | 1787 | 8.68702607939 |               |
| NM_001099415 | POM121C  | 1176 | 1262 | 9.10206357867 |               |
| NM_001099415 | POM121C  | 4277 | 4436 | 10.1020635787 |               |
| NM_001099415 | POM121C  | 838  | 927  | 9.10206357867 |               |
| NM_001099415 | POM121C  | 945  | 1090 | 9.42399167356 |               |
| NM_001099415 | POM121C  | 1846 | 1966 | 7.10206357867 |               |
| NM_001099415 | POM121C  | 3722 | 3973 | 10.4239916736 |               |
| NM_001099415 | POM121C  | 4444 | 4585 | 9.68702607939 |               |
| NM_001099415 | POM121C  | 1506 | 1597 | 9.68702607939 |               |
| NM_001099415 | POM121C  | 4628 | 4852 | 11.4943810014 |               |
| NM_001099415 | POM121C  | 5660 | 5855 | 7.10206357867 |               |
| NM_001099415 | POM121C  | 619  | 824  | 10.2719885801 |               |
| NM_001099415 | POM121C  | 5294 | 5397 | 8.10206357867 |               |
| NM_001099415 | POM121C  | 2376 | 2610 | 8.68702607939 |               |
| NM_001099415 | POM121C  | 2824 | 2930 | 8.68702607939 |               |
| NM_012343    | NNT      | 1414 | 1560 | 9.70209635284 |               |
| NM_012343    | NNT      | 4104 | 4144 | 7.89456768046 |               |
| NM_012343    | NNT      | 3188 | 3254 | 7.89072383061 |               |
| NM_012343    | NNT      | 2103 | 2165 | 6.89474143078 |               |
| NM_012343    | NNT      | 2725 | 2801 | 8.4797039315  |               |
| NM_012343    | NNT      | 2666 | 2720 | 9.21666952567 |               |
| NM_012343    | NNT      | 1601 | 1650 | 6.89474119486 |               |
| NM_012343    | NNT      | 3943 | 3996 | 7.89072383061 |               |
| NM_012343    | NNT      | 3583 | 3661 | 8.4797039315  |               |
| NM_012343    | NNT      | 682  | 729  | 6.89474119486 |               |
| NM_012343    | NNT      | 2278 | 2358 | 8.89474143078 |               |

|              |        |      |      |               |
|--------------|--------|------|------|---------------|
| NM_012343    | NNT    | 2940 | 3009 | 6.89456768046 |
| NM_012343    | NNT    | 516  | 575  | 7.89473469972 |
| NM_012343    | NNT    | 2189 | 2266 | 8.47970393128 |
| NM_012343    | NNT    | 1000 | 1053 | 8.4797039315  |
| NM_012343    | NNT    | 3343 | 3417 | 8.89474143078 |
| NM_012343    | NNT    | 1054 | 1164 | 7.89474142323 |
| NM_012343    | NNT    | 219  | 305  | 6.89474143078 |
| NM_012343    | NNT    | 1828 | 1897 | 7.89473469972 |
| NM_012342    | BAMBI  | 43   | 86   | 4.84744078065 |
| NM_012342    | BAMBI  | 1400 | 1438 | 3.8434231807  |
| NM_012342    | BAMBI  | 473  | 699  | 7.01736578232 |
| NM_012342    | BAMBI  | 399  | 466  | 5.42838568143 |
| NM_012342    | BAMBI  | 874  | 978  | 6.65479570293 |
| NM_012342    | BAMBI  | 1033 | 1123 | 6.16936887576 |
| NM_012342    | BAMBI  | 1154 | 1364 | 6.65479570293 |
| NM_012341    | GTPBP4 | 1950 | 2003 | 4.04122358092 |
| NM_012341    | GTPBP4 | 678  | 778  | 6.04122358115 |
| NM_012341    | GTPBP4 | 1604 | 1677 | 5.62618608187 |
| NM_012341    | GTPBP4 | 550  | 597  | 4.04121685009 |
| NM_012341    | GTPBP4 | 79   | 168  | 4.04122358115 |
| NM_012341    | GTPBP4 | 307  | 376  | 6.04122358115 |
| NM_012341    | GTPBP4 | 380  | 482  | 7.04122358115 |
| NM_012341    | GTPBP4 | 2211 | 2323 | 5.62618608187 |
| NM_012341    | GTPBP4 | 1249 | 1352 | 6.8485785032  |
| NM_012341    | GTPBP4 | 828  | 984  | 6.8485785032  |
| NM_001020825 | NR3C1  | 2465 | 2535 | 8.26776558486 |
| NM_001020825 | NR3C1  | 476  | 524  | 8.6829701034  |
| NM_001020825 | NR3C1  | 1574 | 1652 | 8.68297683446 |
| NM_001020825 | NR3C1  | 2348 | 2395 | 8.18380012579 |
| NM_001020825 | NR3C1  | 1038 | 1095 | 7.6829701034  |
| NM_001020825 | NR3C1  | 2260 | 2320 | 9.00489819829 |
| NM_001020825 | NR3C1  | 1114 | 1183 | 7.59883762507 |
| NM_001020825 | NR3C1  | 1196 | 1297 | 8.68297683446 |
| NM_001020825 | NR3C1  | 1447 | 1518 | 8.263921735   |
| NM_001020825 | NR3C1  | 3638 | 3707 | 6.67895923428 |
| NM_001020825 | NR3C1  | 2079 | 2229 | 9.00490492934 |
| NM_014966    | DHX30  | 690  | 775  | 6.90007231736 |
| NM_014966    | DHX30  | 2669 | 2709 | 5.89989856704 |
| NM_014966    | DHX30  | 2347 | 2460 | 8.48503481808 |
| NM_014966    | DHX30  | 3199 | 3242 | 6.81593310797 |
| NM_014966    | DHX30  | 3369 | 3412 | 5.81593310797 |
| NM_014966    | DHX30  | 1211 | 1258 | 6.90007208144 |
| NM_014966    | DHX30  | 2982 | 3023 | 5.89989856704 |
| NM_014966    | DHX30  | 1136 | 1207 | 7.90007231736 |
| NM_014963    | SBN02  | 2684 | 2739 | 7.29677192453 |
| NM_014963    | SBN02  | 4550 | 4627 | 8.96586690358 |
| NM_014963    | SBN02  | 3091 | 3169 | 8.96587363463 |
| NM_014963    | SBN02  | 2205 | 2253 | 8.38091112636 |
| NM_014963    | SBN02  | 2265 | 2330 | 8.38091112636 |
| NM_014963    | SBN02  | 3857 | 3931 | 7.38090440286 |

|           |        |      |      |               |
|-----------|--------|------|------|---------------|
| NM_014963 | SBN02  | 1932 | 1990 | 7.29677192453 |
| NM_014963 | SBN02  | 3225 | 3289 | 7.38073738359 |
| NM_014963 | SBN02  | 2359 | 2427 | 7.38091112636 |
| NM_014963 | SBN02  | 2917 | 2974 | 7.29677192453 |
| NM_014963 | SBN02  | 485  | 601  | 10.188266056  |
| NM_005015 | OXA1L  | 693  | 755  | 3.72488037633 |
| NM_005015 | OXA1L  | 763  | 881  | 6.72889797651 |
| NM_005015 | OXA1L  | 1100 | 1389 | 7.97682548995 |
| NM_005015 | OXA1L  | 416  | 594  | 6.89882297795 |
| NM_005015 | OXA1L  | 168  | 247  | 5.31386047723 |
| NM_005015 | OXA1L  | 892  | 1080 | 7.63578857211 |
| NM_005015 | OXA1L  | 1426 | 1574 | 7.63578857211 |
| NM_005013 | NUCB2  | 1162 | 1208 | 2.85647966654 |
| NM_005013 | NUCB2  | 1368 | 1428 | 3.94061887592 |
| NM_005013 | NUCB2  | 1482 | 1564 | 2.9406188757  |
| NM_005013 | NUCB2  | 156  | 222  | 4.94061887592 |
| NM_005013 | NUCB2  | 733  | 810  | 3.9404451256  |
| NM_005013 | NUCB2  | 231  | 320  | 4.52558137664 |
| NM_005013 | NUCB2  | 536  | 708  | 5.26254697081 |
| NM_005010 | NRCAM  | 1222 | 1306 | 13.8944380229 |
| NM_005010 | NRCAM  | 558  | 608  | 14.4795675429 |
| NM_005010 | NRCAM  | 1879 | 1915 | 14.8104725639 |
| NM_005010 | NRCAM  | 2366 | 2446 | 14.8946117732 |
| NM_005010 | NRCAM  | 2798 | 2848 | 14.8946115373 |
| NM_005010 | NRCAM  | 4040 | 4132 | 12.8946117657 |
| NM_005010 | NRCAM  | 2917 | 3064 | 14.479574274  |
| NM_005010 | NRCAM  | 3288 | 3364 | 14.479574274  |
| NM_005010 | NRCAM  | 2685 | 2755 | 14.4755566738 |
| NM_005010 | NRCAM  | 3566 | 3687 | 15.8946117732 |
| NM_005010 | NRCAM  | 3066 | 3108 | 14.4795675429 |
| NM_005010 | NRCAM  | 3936 | 3994 | 12.8104725639 |
| NM_005010 | NRCAM  | 157  | 208  | 12.8104725639 |
| NM_005010 | NRCAM  | 2481 | 2530 | 12.8104725639 |
| NM_005010 | NRCAM  | 1341 | 1393 | 12.8905941731 |
| NM_005010 | NRCAM  | 1984 | 2033 | 14.4755566738 |
| NM_005010 | NRCAM  | 698  | 782  | 14.4795742737 |
| NM_005010 | NRCAM  | 3829 | 3900 | 13.8946115373 |
| NM_177433 | MAGED2 | 1768 | 1822 | 5.25934586597 |
| NM_177433 | MAGED2 | 779  | 835  | 4.3434783443  |
| NM_177433 | MAGED2 | 1621 | 1707 | 5.34331132503 |
| NM_177433 | MAGED2 | 1717 | 1758 | 4.34331132503 |
| NM_177433 | MAGED2 | 222  | 350  | 7.15083999741 |
| NM_177433 | MAGED2 | 1084 | 1189 | 5.34348507535 |
| NM_177433 | MAGED2 | 1492 | 1575 | 6.66541317024 |
| NM_177433 | MAGED2 | 1194 | 1354 | 7.15083999741 |
| NM_177433 | MAGED2 | 1367 | 1480 | 6.92844757607 |
| NM_177433 | MAGED2 | 1949 | 2101 | 5.92844757607 |
| NM_176818 | GATC   | 104  | 184  | 7.7316705082  |
| NM_176812 | CHMP4B | 368  | 416  | 2.34428809735 |
| NM_176812 | CHMP4B | 780  | 833  | 1.34428833305 |



|              |          |       |       |                    |
|--------------|----------|-------|-------|--------------------|
| NM_176812    | CHMP4B   | 1161  | 1219  | 3.66621642815      |
| NM_176812    | CHMP4B   | 1517  | 1590  | 1.34428832572      |
| NM_176812    | CHMP4B   | 1049  | 1159  | 4.66621642816      |
| NM_176812    | CHMP4B   | 837   | 928   | 2.34428833327      |
| NM_176812    | CHMP4B   | 1298  | 1514  | 5.15164325533      |
| NM_176812    | CHMP4B   | 557   | 760   | 4.34428833327      |
| NM_176816    | CCDC125  | 1928  | 1966  | 7.64005719881      |
| NM_176814    | ZNF800   | 863   | 930   | 7.67413186506      |
| NM_176814    | ZNF800   | 2461  | 2533  | 9.08019243828      |
| NM_001185080 | CLDN15   | 1326  | 1434  | 10.5226668944      |
| NM_001185080 | CLDN15   | 1119  | 1200  | 11.1076293876      |
| NM_001185080 | CLDN15   | 644   | 795   | 12.8445949893      |
| NM_001185080 | CLDN15   | 304   | 345   | 9.52266016334      |
| NM_001185080 | CLDN15   | 1201  | 1311  | 11.8445949893      |
| NM_001034841 | ITPRIPL2 |       | 1264  | 1321 10.5808246094 |
| NM_001042681 | RERE     | 421   | 481   | 4.72205334012      |
| NM_001042681 | RERE     | 5467  | 5533  | 4.80619254195      |
| NM_001042681 | RERE     | 7362  | 7446  | 5.8061925495       |
| NM_001042681 | RERE     | 7487  | 7569  | 6.39115505022      |
| NM_001042681 | RERE     | 5318  | 5431  | 4.80619254195      |
| NM_001042681 | RERE     | 7120  | 7169  | 5.80618581845      |
| NM_001042681 | RERE     | 959   | 1038  | 6.39115505         |
| NM_001042681 | RERE     | 1235  | 1327  | 6.8061925495       |
| NM_001042681 | RERE     | 7920  | 7980  | 5.72205334012      |
| NM_001042681 | RERE     | 2767  | 2837  | 4.80217494933      |
| NM_001042681 | RERE     | 2060  | 2128  | 5.72205334012      |
| NM_006076    | AGFG2    | 2483  | 2585  | 8.48197868819      |
| NM_006076    | AGFG2    | 3150  | 3193  | 6.8929985873       |
| NM_006076    | AGFG2    | 375   | 443   | 8.89701618747      |
| NM_006076    | AGFG2    | 445   | 534   | 9.89701618747      |
| NM_006076    | AGFG2    | 3285  | 3362  | 8.48197868819      |
| NM_006076    | AGFG2    | 3387  | 3471  | 6.89701618747      |
| NM_006076    | AGFG2    | 889   | 952   | 6.89684243715      |
| NM_006076    | AGFG2    | 2116  | 2207  | 8.48197868819      |
| NM_006076    | AGFG2    | 2354  | 2405  | 6.89701617992      |
| NM_006076    | AGFG2    | 2289  | 2348  | 6.89700945642      |
| NM_006076    | AGFG2    | 1558  | 1692  | 8.48197868819      |
| NM_006076    | AGFG2    | 1428  | 1532  | 6.89701618747      |
| NM_006076    | AGFG2    | 308   | 374   | 6.89684243715      |
| NM_006076    | AGFG2    | 648   | 845   | 9.48197868819      |
| NM_201379    | PLEC     | 267   | 308   | 7.10837332214      |
| NM_201379    | PLEC     | 828   | 874   | 7.10838005319      |
| NM_201379    | PLEC     | 12285 | 12377 | 8.10838004565      |
| NM_201379    | PLEC     | 12381 | 12459 | 8.69334255392      |
| NM_201379    | PLEC     | 8112  | 8148  | 7.02424084381      |
| NM_201379    | PLEC     | 7551  | 7625  | 7.10436245302      |
| NM_201379    | PLEC     | 14304 | 14408 | 8.1083800532       |
| NM_201379    | PLEC     | 8149  | 8218  | 8.69334255392      |
| NM_201379    | PLEC     | 1843  | 1942  | 9.1083800532       |
| NM_201379    | PLEC     | 1380  | 1487  | 9.69334255392      |

|              |         |       |       |               |
|--------------|---------|-------|-------|---------------|
| NM_201379    | PLEC    | 2908  | 2963  | 8.1083800532  |
| NM_201379    | PLEC    | 13707 | 13744 | 7.10436245302 |
| NM_201379    | PLEC    | 9808  | 9865  | 8.1083800532  |
| NM_201379    | PLEC    | 3978  | 4110  | 8.69334255392 |
| NM_201379    | PLEC    | 10559 | 10635 | 8.69334255392 |
| NM_201379    | PLEC    | 9308  | 9387  | 8.69334254637 |
| NM_201379    | PLEC    | 8609  | 8666  | 7.10837981728 |
| NM_201379    | PLEC    | 13349 | 13477 | 8.1083800532  |
| NM_201379    | PLEC    | 12012 | 12170 | 9.69334255392 |
| NM_201379    | PLEC    | 2733  | 2811  | 9.43030814808 |
| NM_201379    | PLEC    | 9896  | 9987  | 9.1083800532  |
| NM_201379    | PLEC    | 13078 | 13129 | 7.1083800532  |
| NM_201379    | PLEC    | 10647 | 10726 | 8.69333582286 |
| NM_201379    | PLEC    | 416   | 508   | 8.10838005319 |
| NM_201379    | PLEC    | 10983 | 11094 | 8.69334255392 |
| NM_201379    | PLEC    | 9088  | 9204  | 8.1083800532  |
| NM_201379    | PLEC    | 8290  | 8362  | 7.10820630288 |
| NM_201379    | PLEC    | 10060 | 10141 | 9.1083800532  |
| NM_201379    | PLEC    | 3846  | 3955  | 8.1083800532  |
| NM_201379    | PLEC    | 356   | 415   | 8.02424084381 |
| NM_201379    | PLEC    | 12852 | 12961 | 7.10838005297 |
| NM_201379    | PLEC    | 1958  | 2102  | 7.1083800532  |
| NM_201379    | PLEC    | 13586 | 13670 | 7.1083800532  |
| NM_201379    | PLEC    | 2328  | 2419  | 8.1083800532  |
| NM_201379    | PLEC    | 1623  | 1717  | 8.693342318   |
| NM_201379    | PLEC    | 663   | 812   | 9.1083800532  |
| NM_201379    | PLEC    | 14228 | 14287 | 7.10837981728 |
| NM_201379    | PLEC    | 8829  | 8900  | 8.10838004565 |
| NM_001206941 | FAM115A | 438   | 498   | 5.95810005117 |
| NM_001206941 | FAM115A | 164   | 314   | 9.12802505262 |
| NM_001206941 | FAM115A | 2456  | 2543  | 5.87396084179 |
| NM_001206941 | FAM115A | 2001  | 2043  | 5.95810004362 |
| NM_001206941 | FAM115A | 829   | 877   | 7.54306255189 |
| NM_001206941 | FAM115A | 517   | 608   | 8.95810005117 |
| NM_001206941 | FAM115A | 721   | 797   | 5.95792630086 |
| NM_001206941 | FAM115A | 2291  | 2359  | 5.95792630086 |
| NM_001206941 | FAM115A | 917   | 1012  | 9.28002814606 |
| NM_001206941 | FAM115A | 367   | 432   | 6.95810005117 |
| NM_001206941 | FAM115A | 1674  | 1777  | 9.28002814606 |
| NM_001206941 | FAM115A | 1319  | 1447  | 9.28002814606 |
| NM_001206941 | FAM115A | 1886  | 1998  | 8.54306255189 |
| NM_001206941 | FAM115A | 1027  | 1291  | 10.2800281461 |
| NM_001206941 | FAM115A | 2124  | 2195  | 7.95810005117 |
| NM_001206941 | FAM115A | 1539  | 1664  | 8.95810005117 |
| NM_133368    | RSPRY1  | 1158  | 1222  | 6.41546723674 |
| NM_133368    | RSPRY1  | 1642  | 1686  | 7.00042973746 |
| NM_133368    | RSPRY1  | 621   | 645   | 6.41546723674 |
| NM_003591    | CUL2    | 1311  | 1377  | 7.45646219978 |
| NM_003591    | CUL2    | 226   | 295   | 5.45646219956 |
| NM_003591    | CUL2    | 623   | 680   | 7.45646219223 |

|           |         |      |      |               |
|-----------|---------|------|------|---------------|
| NM_003591 | CUL2    | 351  | 403  | 7.0414247005  |
| NM_003591 | CUL2    | 1435 | 1471 | 5.3723229904  |
| NM_003591 | CUL2    | 2217 | 2287 | 6.45244459961 |
| NM_003591 | CUL2    | 1113 | 1199 | 8.45646219978 |
| NM_003591 | CUL2    | 2359 | 2423 | 5.45244459961 |
| NM_003591 | CUL2    | 418  | 554  | 7.77839029467 |
| NM_003591 | CUL2    | 1493 | 1599 | 7.45646219978 |
| NM_206876 | PPP1CB  | 1831 | 1893 | 4.76397487017 |
| NM_206876 | PPP1CB  | 1066 | 1131 | 5.50094047189 |
| NM_206876 | PPP1CB  | 1983 | 2024 | 3.17900564595 |
| NM_206876 | PPP1CB  | 2482 | 2569 | 3.179012377   |
| NM_206876 | PPP1CB  | 1281 | 1341 | 3.17499477683 |
| NM_206876 | PPP1CB  | 609  | 851  | 7.82286856678 |
| NM_206876 | PPP1CB  | 416  | 484  | 3.179012377   |
| NM_206876 | PPP1CB  | 300  | 408  | 4.76397487772 |
| NM_206876 | PPP1CB  | 1494 | 1580 | 3.17901237678 |
| NM_206876 | PPP1CB  | 857  | 1032 | 6.98636729906 |
| NM_206873 | PPP1CA  | 1080 | 1128 | 5.51191654146 |
| NM_206873 | PPP1CA  | 1181 | 1257 | 4.92695404074 |
| NM_206873 | PPP1CA  | 123  | 240  | 7.24888213563 |
| NM_206873 | PPP1CA  | 245  | 387  | 7.7343089628  |
| NM_206873 | PPP1CA  | 390  | 968  | 9.8095970901  |
| NM_153816 | SNX14   | 2397 | 2451 | 5.47424525211 |
| NM_153816 | SNX14   | 3115 | 3160 | 5.47022765948 |
| NM_153816 | SNX14   | 3055 | 3096 | 6.05903401006 |
| NM_153816 | SNX14   | 2922 | 3051 | 7.93367687829 |
| NM_153816 | SNX14   | 1876 | 2096 | 8.28160018171 |
| NM_153816 | SNX14   | 2458 | 2501 | 6.0551901602  |
| NM_153816 | SNX14   | 2750 | 2875 | 7.28160018171 |
| NM_153816 | SNX14   | 346  | 421  | 8.1746849778  |
| NM_153816 | SNX14   | 2522 | 2741 | 8.86656268243 |
| NM_153816 | SNX14   | 1415 | 1505 | 6.47424525966 |
| NM_153816 | SNX14   | 1512 | 1576 | 6.05920775283 |
| NM_153816 | SNX14   | 1670 | 1717 | 4.47407150934 |
| NM_153816 | SNX14   | 849  | 1408 | 10.3322262548 |
| NM_153816 | SNX14   | 1768 | 1859 | 4.47424525966 |
| NM_153816 | SNX14   | 187  | 326  | 6.79617335454 |
| NM_153816 | SNX14   | 435  | 694  | 8.05920776038 |
| NM_153816 | SNX14   | 2109 | 2261 | 7.05920776038 |
| NM_001159 | AOX1    | 3198 | 3248 | 6.59568905001 |
| NM_004308 | ARHGAP1 | 1645 | 1745 | 8.59136185956 |
| NM_004308 | ARHGAP1 | 2867 | 2945 | 8.00639935883 |
| NM_004308 | ARHGAP1 | 651  | 682  | 6.92226014946 |
| NM_004308 | ARHGAP1 | 3252 | 3312 | 7.00639262779 |
| NM_004308 | ARHGAP1 | 796  | 827  | 8.00639262779 |
| NM_004308 | ARHGAP1 | 2036 | 2086 | 6.92226014946 |
| NM_004308 | ARHGAP1 | 242  | 286  | 8.00639935862 |
| NM_004308 | ARHGAP1 | 3321 | 3354 | 8.00622560852 |
| NM_004308 | ARHGAP1 | 157  | 241  | 9.32832745373 |
| NM_004308 | ARHGAP1 | 2567 | 2635 | 7.00639935129 |

|           |          |      |      |               |               |
|-----------|----------|------|------|---------------|---------------|
| NM_004308 | ARHGAP1  | 483  | 557  | 9.32832745373 |               |
| NM_004308 | ARHGAP1  | 1772 | 1927 | 9.32832745373 |               |
| NM_025238 | BTBD1    | 1199 | 1250 | 5.08467776137 |               |
| NM_025238 | BTBD1    | 3009 | 3046 | 6.67348411194 |               |
| NM_025238 | BTBD1    | 2301 | 2381 | 5.08852161122 |               |
| NM_153810 | C10orf46 |      | 4074 | 4137          | 8.60093569835 |
| NM_153810 | C10orf46 |      | 2139 | 2227          | 9.18589842744 |
| NM_153810 | C10orf46 |      | 823  | 872           | 8.51679672489 |
| NM_025235 | TNKS2    | 1055 | 1146 | 8.49870190359 |               |
| NM_025235 | TNKS2    | 2371 | 2445 | 7.76156255911 |               |
| NM_025235 | TNKS2    | 1457 | 1522 | 7.17677380871 |               |
| NM_025235 | TNKS2    | 4175 | 4229 | 7.17275620853 |               |
| NM_025235 | TNKS2    | 3910 | 3967 | 6.17676707765 |               |
| NM_025235 | TNKS2    | 5190 | 5247 | 7.76172957837 |               |
| NM_025235 | TNKS2    | 3184 | 3220 | 6.17275620853 |               |
| NM_025235 | TNKS2    | 2749 | 2805 | 6.17660005839 |               |
| NM_025235 | TNKS2    | 2510 | 2551 | 6.09263459932 |               |
| NM_025235 | TNKS2    | 4910 | 4952 | 6.09263459932 |               |
| NM_025235 | TNKS2    | 3067 | 3155 | 6.17677380116 |               |
| NM_025235 | TNKS2    | 1212 | 1255 | 7.17275620853 |               |
| NM_025235 | TNKS2    | 1532 | 1666 | 8.17677380871 |               |
| NM_025235 | TNKS2    | 3446 | 3494 | 6.17275620853 |               |
| NM_025235 | TNKS2    | 5995 | 6072 | 6.17677380116 |               |
| NM_001153 | ANXA4    | 1613 | 1650 | 4.54313829567 |               |
| NM_001153 | ANXA4    | 806  | 858  | 6.12827454671 |               |
| NM_001153 | ANXA4    | 1752 | 1809 | 4.54331181007 |               |
| NM_001153 | ANXA4    | 169  | 237  | 6.35066696805 |               |
| NM_001153 | ANXA4    | 2044 | 2096 | 5.12827454671 |               |
| NM_001153 | ANXA4    | 1313 | 1396 | 5.54331203844 |               |
| NM_001153 | ANXA4    | 310  | 588  | 6.71323704743 |               |
| NM_001153 | ANXA4    | 594  | 803  | 6.86524014088 |               |
| NM_001153 | ANXA4    | 1045 | 1283 | 7.63077488724 |               |
| NM_001153 | ANXA4    | 870  | 978  | 5.12827454671 |               |
| NM_001150 | ANPEP    | 2306 | 2375 | 3.38839797756 |               |
| NM_001150 | ANPEP    | 2165 | 2232 | 4.38839774919 |               |
| NM_001150 | ANPEP    | 1813 | 1851 | 3.38438038493 |               |
| NM_001150 | ANPEP    | 2065 | 2095 | 3.38438038493 |               |
| NM_001150 | ANPEP    | 1332 | 1397 | 3.38839798511 |               |
| NM_001150 | ANPEP    | 1166 | 1256 | 5.71032584407 |               |
| NM_001150 | ANPEP    | 2825 | 2887 | 4.30425877572 |               |
| NM_001150 | ANPEP    | 1447 | 1553 | 3.38839797756 |               |
| NM_001151 | SLC25A4  | 492  | 557  | 5.01921380138 |               |
| NM_001151 | SLC25A4  | 964  | 996  | 3.935074592   |               |
| NM_001151 | SLC25A4  | 1230 | 1281 | 4.01904005107 |               |
| NM_001151 | SLC25A4  | 856  | 916  | 4.01519620121 |               |
| NM_001151 | SLC25A4  | 659  | 770  | 4.01921380116 |               |
| NM_001151 | SLC25A4  | 567  | 653  | 6.34114189627 |               |
| NM_001151 | SLC25A4  | 237  | 289  | 5.60015870193 |               |
| NM_001157 | ANXA11   | 1262 | 1313 | 6.06027718472 |               |
| NM_001157 | ANXA11   | 1856 | 1960 | 7.86763210678 |               |

|              |          |      |      |               |               |
|--------------|----------|------|------|---------------|---------------|
| NM_001157    | ANXA11   | 1086 | 1153 | 5.06027718471 |               |
| NM_001157    | ANXA11   | 317  | 366  | 4.97613797534 |               |
| NM_001157    | ANXA11   | 1991 | 2034 | 6.06027045367 |               |
| NM_001157    | ANXA11   | 368  | 439  | 6.64523968544 |               |
| NM_001157    | ANXA11   | 1420 | 1500 | 6.56110047606 |               |
| NM_001157    | ANXA11   | 1581 | 1644 | 5.06027718472 |               |
| NM_001157    | ANXA11   | 1645 | 1711 | 6.64523944952 |               |
| NM_001157    | ANXA11   | 1742 | 1841 | 7.64523968544 |               |
| NM_001157    | ANXA11   | 904  | 1076 | 8.38220527961 |               |
| NM_001157    | ANXA11   | 1153 | 1213 | 4.97613797534 |               |
| NM_001154    | ANXA5    | 1276 | 1350 | 5.35585918346 |               |
| NM_001154    | ANXA5    | 641  | 737  | 4.6188935893  |               |
| NM_001154    | ANXA5    | 764  | 923  | 5.94082168419 |               |
| NM_001154    | ANXA5    | 923  | 1183 | 6.20385609002 |               |
| NM_001154    | ANXA5    | 111  | 577  | 7.64864093269 |               |
| NM_004651    | USP11    | 3002 | 3071 | 5.74620598029 |               |
| NM_004651    | USP11    | 3132 | 3179 | 5.6620667709  |               |
| NM_004651    | USP11    | 3218 | 3285 | 7.06813407517 |               |
| NM_004651    | USP11    | 1331 | 1378 | 4.74619924923 |               |
| NM_004651    | USP11    | 2691 | 2776 | 4.6620667709  |               |
| NM_004651    | USP11    | 2150 | 2214 | 5.74603222997 |               |
| NM_004651    | USP11    | 1642 | 1701 | 4.74619924923 |               |
| NM_004651    | USP11    | 1704 | 1778 | 6.32715088083 |               |
| NM_004651    | USP11    | 1395 | 1457 | 6.331168481   |               |
| NM_004651    | USP11    | 2226 | 2319 | 6.33116848079 |               |
| NM_004651    | USP11    | 2320 | 2394 | 4.74620597274 |               |
| NM_004651    | USP11    | 2540 | 2631 | 6.74620598029 |               |
| NM_004651    | USP11    | 1786 | 1856 | 6.33116824509 |               |
| NM_004651    | USP11    | 718  | 793  | 6.33116848101 |               |
| NM_004651    | USP11    | 1223 | 1302 | 5.74620598028 |               |
| NM_004651    | USP11    | 407  | 512  | 4.74620598029 |               |
| NM_004651    | USP11    | 858  | 984  | 7.55356090234 |               |
| NM_001195563 | CAMTA1   | 359  | 440  | 7.01544776533 |               |
| NM_001143835 | NFRKB    | 1993 | 2032 | 7.02351042116 |               |
| NM_001143835 | NFRKB    | 1013 | 1061 | 6.10363203037 |               |
| NM_000791    | DHFR     | 808  | 855  | 5.78638212092 |               |
| NM_000791    | DHFR     | 886  | 935  | 4.7823645283  |               |
| NM_000791    | DHFR     | 531  | 593  | 4.7823645283  |               |
| NM_000791    | DHFR     | 1068 | 1159 | 6.36732702902 |               |
| NM_016199    | LSM7     | 41   | 92   | 5.09195307932 |               |
| NM_016199    | LSM7     | 138  | 254  | 8.09597067949 |               |
| NM_016199    | LSM7     | 397  | 438  | 5.09195307932 |               |
| NM_001171155 | C19orf79 |      | 235  | 306           | 6.49618726483 |
| NM_001171155 | C19orf79 |      | 62   | 120           | 7.49618726484 |
| NM_001171155 | C19orf79 |      | 150  | 196           | 4.82708555473 |
| NM_017828    | COMMD4   | 894  | 934  | 7.28244645134 |               |
| NM_017828    | COMMD4   | 92   | 182  | 9.86758270238 |               |
| NM_017828    | COMMD4   | 337  | 381  | 8.27860260148 |               |
| NM_017828    | COMMD4   | 666  | 764  | 9.28262020166 |               |
| NM_017828    | COMMD4   | 198  | 274  | 8.19848099227 |               |

|              |          |      |      |               |               |
|--------------|----------|------|------|---------------|---------------|
| NM_017825    | ADPHL2   | 676  | 710  | 8.01809491293 |               |
| NM_017824    | MARCH5   | 330  | 408  | 6.25721446737 |               |
| NM_017824    | MARCH5   | 577  | 623  | 5.25721446737 |               |
| NM_017824    | MARCH5   | 939  | 1004 | 5.84217024459 |               |
| NM_017824    | MARCH5   | 1165 | 1234 | 5.25721446737 |               |
| NM_017824    | MARCH5   | 625  | 751  | 7.42713947637 |               |
| NM_017824    | MARCH5   | 756  | 851  | 7.25721447492 |               |
| NM_017827    | SARS2    | 1923 | 1985 | 8.08934487878 |               |
| NM_017827    | SARS2    | 420  | 512  | 8.08951862909 |               |
| NM_017827    | SARS2    | 1764 | 1889 | 9.08951862155 |               |
| NM_017827    | SARS2    | 818  | 915  | 9.08951862155 |               |
| NM_017822    | C12orf41 |      | 745  | 797           | 7.04105258148 |
| NM_017822    | C12orf41 |      | 1983 | 2104          | 8.63003268237 |
| NM_017822    | C12orf41 |      | 1578 | 1630          | 9.04489643133 |
| NM_017822    | C12orf41 |      | 1078 | 1161          | 8.0450634506  |
| NM_017822    | C12orf41 |      | 135  | 207           | 9.04489643133 |
| NM_017822    | C12orf41 |      | 1650 | 1751          | 9.04507018165 |
| NM_020062    | SLC2A4RG |      | 503  | 561           | 6.83669356945 |
| NM_020062    | SLC2A4RG |      | 728  | 834           | 7.33587027811 |
| NM_001146314 | ABHD14B  | 1420 | 1486 | 6.57995420507 |               |
| NM_001146314 | ABHD14B  | 1272 | 1372 | 7.3169133041  |               |
| NM_016338    | IP011    | 1665 | 1719 | 7.72081764501 |               |
| NM_016338    | IP011    | 1011 | 1088 | 8.30578014573 |               |
| NM_016338    | IP011    | 364  | 443  | 7.63685218594 |               |
| NM_016338    | IP011    | 671  | 723  | 8.22181468666 |               |
| NM_016448    | DTL      | 3086 | 3125 | 8.26387927345 |               |
| NM_016448    | DTL      | 2728 | 2801 | 8.26789014257 |               |
| NM_016448    | DTL      | 2669 | 2706 | 8.26387927345 |               |
| NM_016448    | DTL      | 1260 | 1300 | 8.2677231233  |               |
| NM_016448    | DTL      | 703  | 742  | 8.2677231233  |               |
| NM_016448    | DTL      | 4184 | 4219 | 7.18375766424 |               |
| NM_016448    | DTL      | 2461 | 2542 | 7.26387927345 |               |
| NM_016448    | DTL      | 2933 | 2978 | 7.18375766424 |               |
| NM_016448    | DTL      | 1112 | 1210 | 10.2678968736 |               |
| NM_016448    | DTL      | 1717 | 1765 | 8.26387927345 |               |
| NM_016448    | DTL      | 4067 | 4101 | 9.58981823746 |               |
| NM_016448    | DTL      | 942  | 1054 | 10.4378218751 |               |
| NM_016448    | DTL      | 1221 | 1258 | 8.26387927345 |               |
| NM_016448    | DTL      | 1985 | 2124 | 9.85285937434 |               |
| NM_016448    | DTL      | 246  | 379  | 10.4378218751 |               |
| NM_016448    | DTL      | 776  | 930  | 10.2678968736 |               |
| NM_016448    | DTL      | 3030 | 3081 | 8.2677231233  |               |
| NM_016448    | DTL      | 1419 | 1524 | 9.58982496851 |               |
| NM_016448    | DTL      | 399  | 528  | 8.2678966377  |               |
| NM_020466    | LYRM2    | 216  | 254  | 6.02735123498 |               |
| NM_020466    | LYRM2    | 533  | 617  | 7.10747284419 |               |
| NM_016332    | SEPX1    | 798  | 881  | 5.19426099952 |               |
| NM_016332    | SEPX1    | 680  | 740  | 6.77904998584 |               |
| NM_016332    | SEPX1    | 318  | 402  | 7.51618933033 |               |
| NM_016332    | SEPX1    | 1208 | 1288 | 6.19426122789 |               |

|           |       |      |      |               |
|-----------|-------|------|------|---------------|
| NM_016332 | SEPX1 | 168  | 224  | 5.19408748512 |
| NM_016333 | SRRM2 | 3673 | 3780 | 6.31403108579 |
| NM_016333 | SRRM2 | 4116 | 4181 | 5.57706549162 |
| NM_016333 | SRRM2 | 5799 | 5861 | 3.99210275498 |
| NM_016333 | SRRM2 | 9277 | 9326 | 4.57706549162 |
| NM_016333 | SRRM2 | 3454 | 3521 | 4.9921029909  |
| NM_016333 | SRRM2 | 8804 | 8873 | 3.99192924058 |
| NM_016333 | SRRM2 | 7831 | 7890 | 2.99210299068 |
| NM_016333 | SRRM2 | 8461 | 8517 | 4.57706549162 |
| NM_016333 | SRRM2 | 5868 | 5961 | 5.9921029909  |
| NM_016333 | SRRM2 | 1820 | 1893 | 3.9921029909  |
| NM_016333 | SRRM2 | 8599 | 8659 | 4.57706549162 |
| NM_016333 | SRRM2 | 7239 | 7295 | 2.99210299068 |
| NM_016333 | SRRM2 | 5501 | 5553 | 5.57706549162 |
| NM_016333 | SRRM2 | 3589 | 3665 | 5.57706549162 |
| NM_016333 | SRRM2 | 1718 | 1769 | 3.9921029909  |
| NM_016333 | SRRM2 | 3533 | 3589 | 2.99192924058 |
| NM_016333 | SRRM2 | 1542 | 1621 | 4.9921029909  |
| NM_016333 | SRRM2 | 2618 | 2735 | 5.9921029909  |
| NM_016333 | SRRM2 | 9128 | 9264 | 5.57706549162 |
| NM_016333 | SRRM2 | 8123 | 8272 | 6.79945791296 |
| NM_016333 | SRRM2 | 1311 | 1433 | 6.69254270904 |
| NM_016333 | SRRM2 | 3111 | 3261 | 6.79945791296 |
| NM_016333 | SRRM2 | 5302 | 5484 | 6.79945791296 |
| NM_016333 | SRRM2 | 4471 | 4739 | 7.89899358651 |
| NM_016333 | SRRM2 | 5570 | 5726 | 6.89899358651 |
| NM_016333 | SRRM2 | 1622 | 1709 | 3.9921029909  |
| NM_016333 | SRRM2 | 4253 | 4471 | 6.89899358651 |
| NM_016333 | SRRM2 | 3323 | 3411 | 4.57706549162 |
| NM_016333 | SRRM2 | 2898 | 3109 | 6.31403108579 |
| NM_016333 | SRRM2 | 7919 | 8068 | 6.69254270904 |
| NM_016333 | SRRM2 | 7013 | 7235 | 7.07956583215 |
| NM_016333 | SRRM2 | 7714 | 7829 | 5.31403108579 |
| NM_016333 | SRRM2 | 8890 | 9019 | 5.9921029909  |
| NM_016333 | SRRM2 | 2249 | 2491 | 7.24003050434 |
| NM_016333 | SRRM2 | 7365 | 7625 | 6.16202799234 |
| NM_016333 | SRRM2 | 2013 | 2128 | 5.31403108579 |
| NM_016333 | SRRM2 | 4856 | 4958 | 5.57706549162 |
| NM_016333 | SRRM2 | 4741 | 4855 | 6.31403108579 |
| NM_016333 | SRRM2 | 693  | 1173 | 7.69254270904 |
| NM_016333 | SRRM2 | 3820 | 4093 | 7.45153460954 |
| NM_016333 | SRRM2 | 6007 | 7010 | 9.1418501104  |
| NM_016333 | SRRM2 | 4998 | 5299 | 7.24003050434 |
| NM_016447 | MPP6  | 522  | 578  | 6.73777481924 |
| NM_016447 | MPP6  | 1481 | 1547 | 7.74178568836 |
| NM_016447 | MPP6  | 1373 | 1434 | 7.73777481924 |
| NM_016447 | MPP6  | 1660 | 1756 | 8.74179241941 |
| NM_016447 | MPP6  | 2034 | 2122 | 8.32675492013 |
| NM_016447 | MPP6  | 1823 | 1900 | 7.74179241941 |
| NM_016440 | VRK3  | 695  | 769  | 7.18861366654 |

|           |        |      |      |               |
|-----------|--------|------|------|---------------|
| NM_016440 | VRK3   | 805  | 844  | 6.10849205733 |
| NM_016440 | VRK3   | 325  | 446  | 8.77759376744 |
| NM_016441 | CRIM1  | 990  | 1065 | 7.64956900931 |
| NM_016441 | CRIM1  | 376  | 441  | 4.84204033693 |
| NM_016441 | CRIM1  | 2264 | 2310 | 6.42717658796 |
| NM_016441 | CRIM1  | 1084 | 1166 | 7.42717658797 |
| NM_016441 | CRIM1  | 1589 | 1675 | 7.64956900931 |
| NM_016441 | CRIM1  | 4026 | 4070 | 5.84220735619 |
| NM_016441 | CRIM1  | 2117 | 2175 | 6.84221408724 |
| NM_016441 | CRIM1  | 1455 | 1520 | 6.42716985692 |
| NM_016441 | CRIM1  | 882  | 968  | 6.42717658797 |
| NM_016441 | CRIM1  | 591  | 668  | 4.84220735619 |
| NM_016441 | CRIM1  | 488  | 555  | 5.84204033693 |
| NM_016441 | CRIM1  | 1709 | 1794 | 5.83819648707 |
| NM_016441 | CRIM1  | 1288 | 1344 | 4.84220735619 |
| NM_016441 | CRIM1  | 1360 | 1416 | 4.83819648707 |
| NM_016441 | CRIM1  | 3644 | 3723 | 5.75807487786 |
| NM_016441 | CRIM1  | 254  | 349  | 5.84221408724 |
| NM_016441 | CRIM1  | 2178 | 2254 | 5.84204033693 |
| NM_016441 | CRIM1  | 780  | 844  | 6.42717658797 |
| NM_016441 | CRIM1  | 1855 | 1928 | 5.83819648707 |
| NM_016441 | CRIM1  | 2319 | 2472 | 7.64956900931 |
| NM_016441 | CRIM1  | 3167 | 3228 | 4.84204033693 |
| NM_016442 | ERAP1  | 786  | 833  | 5.46157317765 |
| NM_016442 | ERAP1  | 517  | 619  | 8.04654240942 |
| NM_016442 | ERAP1  | 2457 | 2524 | 7.04654240942 |
| NM_016442 | ERAP1  | 3100 | 3166 | 5.46157967278 |
| NM_016442 | ERAP1  | 1280 | 1348 | 6.46157967278 |
| NM_016442 | ERAP1  | 309  | 358  | 5.37744069932 |
| NM_016442 | ERAP1  | 2607 | 2677 | 5.46157990115 |
| NM_016442 | ERAP1  | 881  | 938  | 5.46157990115 |
| NM_016442 | ERAP1  | 1871 | 1930 | 6.46140615838 |
| NM_016442 | ERAP1  | 984  | 1078 | 8.4615799087  |
| NM_016442 | ERAP1  | 1979 | 2042 | 6.46157990115 |
| NM_016442 | ERAP1  | 2141 | 2359 | 8.92101152734 |
| NM_016442 | ERAP1  | 1715 | 1811 | 8.04654240942 |
| NM_016442 | ERAP1  | 375  | 509  | 8.92101152734 |
| NM_016442 | ERAP1  | 1179 | 1263 | 7.04636865911 |
| NM_016442 | ERAP1  | 1381 | 1702 | 9.78350800359 |
| NM_016442 | ERAP1  | 2878 | 2955 | 6.46157967278 |
| NM_181093 | SCYL3  | 1470 | 1531 | 8.8961899505  |
| NM_181093 | SCYL3  | 418  | 465  | 10.4849963011 |
| NM_015971 | MRPS7  | 661  | 718  | 5.50685874196 |
| NM_015971 | MRPS7  | 1073 | 1250 | 7.09182124268 |
| NM_015972 | POLR1D | 713  | 765  | 1.00595069489 |
| NM_015972 | POLR1D | 235  | 269  | 2.5107915864  |
| NM_015972 | POLR1D | 463  | 524  | 2.00996156401 |
| NM_015972 | POLR1D | 333  | 411  | 3.00996829506 |
| NM_024980 | GPR157 | 971  | 1042 | 8.43259390645 |
| NM_024980 | GPR157 | 330  | 481  | 8.43259390645 |



|              |         |       |       |               |
|--------------|---------|-------|-------|---------------|
| NM_015976    | SNX7    | 1698  | 1739  | 6.68688047307 |
| NM_015976    | SNX7    | 660   | 712   | 7.27568682365 |
| NM_015976    | SNX7    | 167   | 222   | 7.27585384291 |
| NM_015976    | SNX7    | 1166  | 1238  | 5.69089134219 |
| NM_001037165 | FOXK1   | 5950  | 6000  | 8.23776329937 |
| NM_001037165 | FOXK1   | 7562  | 7616  | 9.32190250853 |
| NM_001037165 | FOXK1   | 4103  | 4142  | 9.32172875844 |
| NM_001037165 | FOXK1   | 3653  | 3716  | 8.32190227284 |
| NM_001037165 | FOXK1   | 7024  | 7115  | 9.90686500947 |
| NM_001037165 | FOXK1   | 641   | 708   | 9.32190250875 |
| NM_001037165 | FOXK1   | 10542 | 10583 | 8.31788490858 |
| NM_001037165 | FOXK1   | 4234  | 4295  | 8.32190227284 |
| NM_001037165 | FOXK1   | 9559  | 9631  | 9.90686477356 |
| NM_001037165 | FOXK1   | 5795  | 5886  | 9.90686500925 |
| NM_001037165 | FOXK1   | 9012  | 9068  | 8.23776329937 |
| NM_001037165 | FOXK1   | 8721  | 8791  | 9.32190250875 |
| NM_001037165 | FOXK1   | 2811  | 2893  | 9.90686500947 |
| NM_001037165 | FOXK1   | 2349  | 2493  | 11.1292574308 |
| NM_001037165 | FOXK1   | 6482  | 6509  | 8.31788490858 |
| NM_001037165 | FOXK1   | 7811  | 7855  | 8.3218957777  |
| NM_001037165 | FOXK1   | 7260  | 7445  | 10.9068650095 |
| NM_001037165 | FOXK1   | 4163  | 4192  | 8.32190227284 |
| NM_001037165 | FOXK1   | 1140  | 1208  | 9.32190250875 |
| NM_001037165 | FOXK1   | 7667  | 7737  | 9.90686500193 |
| NM_001037165 | FOXK1   | 6221  | 6327  | 10.3219025088 |
| NM_001037165 | FOXK1   | 9257  | 9338  | 8.31788490858 |
| NM_001037165 | FOXK1   | 8093  | 8135  | 8.32172875844 |
| NM_001037165 | FOXK1   | 4566  | 4655  | 9.32190250875 |
| NM_001037165 | FOXK1   | 4658  | 4870  | 11.3219025088 |
| NM_001037165 | FOXK1   | 4400  | 4496  | 9.90685827842 |
| NM_001037163 | C7orf70 | 321   | 395   | 9.17850209005 |
| NM_001037161 | ACOT1   | 870   | 933   | 6.70507734861 |
| NM_001037161 | ACOT1   | 637   | 765   | 8.70508407967 |
| NM_001037161 | ACOT1   | 1031  | 1129  | 8.02701217455 |
| NM_138473    | SP1     | 1090  | 1132  | 6.53113624653 |
| NM_138473    | SP1     | 1622  | 1676  | 6.45101463732 |
| NM_138473    | SP1     | 4728  | 4803  | 8.11609874725 |
| NM_138477    | CDAN1   | 2242  | 2319  | 10.6993402965 |
| NM_138477    | CDAN1   | 1236  | 1294  | 10.0302385866 |
| NM_138477    | CDAN1   | 1468  | 1569  | 9.11420404565 |
| NM_138477    | CDAN1   | 2726  | 2771  | 9.11036019579 |
| NM_138477    | CDAN1   | 3607  | 3697  | 10.1103601958 |
| NM_138477    | CDAN1   | 1026  | 1070  | 9.03023858658 |
| NM_181672    | OGT     | 1357  | 1406  | 3.69114555335 |
| NM_181672    | OGT     | 1042  | 1120  | 6.01324739856 |
| NM_181672    | OGT     | 2794  | 2877  | 6.86124430511 |
| NM_181672    | OGT     | 322   | 384   | 5.27628180417 |
| NM_181672    | OGT     | 2738  | 2792  | 5.27628180439 |
| NM_181672    | OGT     | 651   | 736   | 5.69131930367 |
| NM_181672    | OGT     | 4525  | 4575  | 5.27610805407 |

|              |         |      |      |                |
|--------------|---------|------|------|----------------|
| NM_181672    | OGT     | 3845 | 3918 | 5.69131930345  |
| NM_181672    | OGT     | 80   | 129  | 3.6873017035   |
| NM_181672    | OGT     | 2399 | 2468 | 6.27628180439  |
| NM_181672    | OGT     | 3150 | 3264 | 6.27628180439  |
| NM_181672    | OGT     | 2100 | 2185 | 5.27628180439  |
| NM_181672    | OGT     | 5228 | 5292 | 4.69131930367  |
| NM_181672    | OGT     | 1982 | 2032 | 5.27628180439  |
| NM_181672    | OGT     | 1582 | 1758 | 6.86124430511  |
| NM_181672    | OGT     | 769  | 930  | 7.01324739856  |
| NM_181672    | OGT     | 572  | 625  | 5.27627507334  |
| NM_181672    | OGT     | 2569 | 2722 | 7.15075092231  |
| NM_181672    | OGT     | 3577 | 3647 | 6.01324739855  |
| NM_181672    | OGT     | 2206 | 2325 | 6.69131930367  |
| NM_181672    | OGT     | 1149 | 1317 | 6.49867422573  |
| NM_181672    | OGT     | 4871 | 4947 | 3.69131930367  |
| NM_181672    | OGT     | 414  | 569  | 6.49867422573  |
| NM_181672    | OGT     | 3266 | 3423 | 6.01324739856  |
| NM_181672    | OGT     | 4026 | 4093 | 4.69131930367  |
| NM_181672    | OGT     | 2915 | 2966 | 5.27610805407  |
| NM_181672    | OGT     | 3663 | 3841 | 6.69131930367  |
| NM_181672    | OGT     | 1830 | 1961 | 6.27628180439  |
| NM_198892    | BMP2K   | 482  | 590  | 9.39320753403  |
| NM_001040431 | CCDC56  | 415  | 496  | 6.9962654684   |
| NM_001040431 | CCDC56  | 533  | 662  | 7.99626546841  |
| NM_001012727 | AGPAT2  | 606  | 691  | 12.0470210878  |
| NM_001012727 | AGPAT2  | 912  | 957  | 10.0470208521  |
| NM_001012727 | AGPAT2  | 176  | 315  | 13.047021088   |
| NM_001012727 | AGPAT2  | 1051 | 1193 | 11.6319835887  |
| NM_001012727 | AGPAT2  | 455  | 546  | 10.047021088   |
| NM_001012727 | AGPAT2  | 317  | 431  | 12.6319835887  |
| NM_001012727 | AGPAT2  | 96   | 149  | 9.96288187864  |
| NM_006659    | TUBGCP2 | 2836 | 2886 | 6.13729170163  |
| NM_006659    | TUBGCP2 | 1668 | 1750 | 7.13729193     |
| NM_006659    | TUBGCP2 | 1753 | 1843 | 6.13729193755  |
| NM_006659    | TUBGCP2 | 391  | 515  | 7.13729193755  |
| NM_006659    | TUBGCP2 | 537  | 684  | 8.45922003244  |
| NM_006659    | TUBGCP2 | 2460 | 2634 | 9.13729193755  |
| NM_002937    | RNASE4  | 492  | 544  | 2.73000327325  |
| NM_002937    | RNASE4  | 920  | 1003 | 0.729996542421 |
| NM_002931    | RING1   | 1310 | 1379 | 7.86540616524  |
| NM_002931    | RING1   | 292  | 445  | 9.36458287391  |
| NM_002931    | RING1   | 541  | 619  | 7.94953864357  |
| NM_198335    | GANAB   | 3766 | 3846 | 4.58702426074  |
| NM_198335    | GANAB   | 3851 | 3886 | 6.17198003041  |
| NM_198335    | GANAB   | 3121 | 3217 | 7.3943791828   |
| NM_198335    | GANAB   | 3905 | 4013 | 5.58702426074  |
| NM_198335    | GANAB   | 2549 | 3121 | 10.8724264796  |
| NM_198335    | GANAB   | 2200 | 2341 | 8.67448710199  |
| NM_198335    | GANAB   | 3218 | 3719 | 10.1719867615  |
| NM_198335    | GANAB   | 93   | 2194 | 12.9664026278  |

|           |          |      |      |                    |
|-----------|----------|------|------|--------------------|
| NM_198335 | GANAB    | 2377 | 2544 | 8.83495177418      |
| NM_031434 | TMUB1    | 1196 | 1230 | 9.0470210878       |
| NM_031434 | TMUB1    | 630  | 685  | 11.3689491829      |
| NM_031434 | TMUB1    | 986  | 1065 | 9.04702108801      |
| NM_031434 | TMUB1    | 346  | 427  | 8.04702108047      |
| NM_031434 | TMUB1    | 1233 | 1316 | 9.63198358852      |
| NM_031434 | TMUB1    | 449  | 579  | 8.0470210878       |
| NM_031432 | UCK1     | 811  | 891  | 6.92625113597      |
| NM_031432 | UCK1     | 1277 | 1366 | 5.92625785948      |
| NM_002938 | RNF4     | 2019 | 2087 | 4.18901086653      |
| NM_002938 | RNF4     | 185  | 241  | 5.18499350227      |
| NM_002938 | RNF4     | 1561 | 1666 | 4.18901110244      |
| NM_002938 | RNF4     | 2872 | 2925 | 4.18883735213      |
| NM_002938 | RNF4     | 2331 | 2394 | 4.18900437139      |
| NM_002938 | RNF4     | 982  | 1054 | 6.51093919733      |
| NM_002938 | RNF4     | 1162 | 1225 | 4.18883735213      |
| NM_002938 | RNF4     | 459  | 604  | 6.18901110245      |
| NM_002938 | RNF4     | 245  | 330  | 5.18900437139      |
| NM_002938 | RNF4     | 830  | 905  | 4.18900437139      |
| NM_002938 | RNF4     | 1911 | 1960 | 4.1890110949       |
| NM_031431 | COG3     | 1063 | 1132 | 6.89237933184      |
| NM_031431 | COG3     | 738  | 806  | 5.89622318169      |
| NM_005441 | CHAF1B   | 519  | 587  | 8.14156330119      |
| NM_005441 | CHAF1B   | 63   | 110  | 7.72651907086      |
| NM_005441 | CHAF1B   | 1075 | 1137 | 6.05742409181      |
| NM_005441 | CHAF1B   | 1647 | 1702 | 7.14138955087      |
| NM_005441 | CHAF1B   | 977  | 1065 | 6.14156306527      |
| NM_005441 | CHAF1B   | 851  | 932  | 8.46349139608      |
| NM_005441 | CHAF1B   | 141  | 185  | 6.13754570102      |
| NM_005441 | CHAF1B   | 1224 | 1337 | 7.72652580191      |
| NM_178526 | SLC25A42 |      | 186  | 237 10.6755232411  |
| NM_178526 | SLC25A42 |      | 2482 | 2574 11.6795408413 |
| NM_175737 | KLB      | 971  | 1046 | 7.55283977228      |
| NM_175737 | KLB      | 5857 | 5925 | 5.88373806218      |
| NM_175737 | KLB      | 2383 | 2432 | 4.96770352124      |
| NM_175737 | KLB      | 771  | 828  | 6.55283977206      |
| NM_175737 | KLB      | 3311 | 3354 | 4.96385967139      |
| NM_175737 | KLB      | 3222 | 3255 | 4.96787054051      |
| NM_175737 | KLB      | 3558 | 3630 | 6.96787727156      |
| NM_175737 | KLB      | 4152 | 4212 | 5.96385967139      |
| NM_175737 | KLB      | 3407 | 3457 | 4.96787703564      |
| NM_175737 | KLB      | 1797 | 1845 | 5.96787054051      |
| NM_175737 | KLB      | 3000 | 3070 | 5.96787727156      |
| NM_175737 | KLB      | 3463 | 3538 | 6.55283977228      |
| NM_175737 | KLB      | 2596 | 2706 | 7.28980536645      |
| NM_175737 | KLB      | 1273 | 1371 | 7.55283977228      |
| NM_175737 | KLB      | 462  | 559  | 6.96787727156      |
| NM_175737 | KLB      | 828  | 965  | 7.55283977228      |
| NM_175737 | KLB      | 1100 | 1264 | 8.4273088902       |
| NM_175737 | KLB      | 3074 | 3160 | 7.96787727156      |

|              |          |      |       |                    |
|--------------|----------|------|-------|--------------------|
| NM_175737    | KLB      | 2066 | 2219  | 6.96787727156      |
| NM_175737    | KLB      | 93   | 156   | 7.2898053589       |
| NM_175737    | KLB      | 1428 | 1611  | 9.05534011281      |
| NM_175737    | KLB      | 1658 | 1790  | 8.137802273        |
| NM_175737    | KLB      | 171  | 441   | 9.61173346133      |
| NM_175737    | KLB      | 2707 | 2810  | 4.96787727156      |
| NM_175737    | KLB      | 1853 | 2046  | 8.137802273        |
| NM_175737    | KLB      | 570  | 738   | 8.55283977228      |
| NM_175737    | KLB      | 2880 | 2939  | 6.55266602196      |
| NM_003557    | PIP5K1A  | 886  | 956   | 8.60917465887      |
| NM_003557    | PIP5K1A  | 804  | 853   | 5.43523205726      |
| NM_003557    | PIP5K1A  | 481  | 533   | 5.43924964988      |
| NM_003557    | PIP5K1A  | 1033 | 1084  | 5.43924942151      |
| NM_003557    | PIP5K1A  | 115  | 148   | 7.43924965721      |
| NM_003557    | PIP5K1A  | 2527 | 2579  | 7.02019455798      |
| NM_003557    | PIP5K1A  | 2669 | 2735  | 7.76117775232      |
| NM_003557    | PIP5K1A  | 1633 | 1671  | 5.43924292638      |
| NM_003557    | PIP5K1A  | 2426 | 2516  | 7.43924965743      |
| NM_003557    | PIP5K1A  | 2107 | 2167  | 6.43907590711      |
| NM_003557    | PIP5K1A  | 1086 | 1140  | 6.43924942151      |
| NM_003557    | PIP5K1A  | 1293 | 1359  | 7.02421215815      |
| NM_003557    | PIP5K1A  | 1519 | 1578  | 5.43924942151      |
| NM_003557    | PIP5K1A  | 1791 | 1855  | 7.02421215793      |
| NM_003558    | PIP5K1B  | 1075 | 1128  | 9.15528057411      |
| NM_003559    | PIP4K2B  | 1258 | 1351  | 5.53969156734      |
| NM_003559    | PIP4K2B  | 3974 | 4055  | 4.53567396717      |
| NM_003559    | PIP4K2B  | 1078 | 1137  | 5.53567396717      |
| NM_003559    | PIP4K2B  | 1162 | 1245  | 5.53969156734      |
| NM_003559    | PIP4K2B  | 2697 | 2795  | 6.53969156734      |
| NM_001145207 | HBS1L    | 300  | 366   | 5.93700025562      |
| NM_001145207 | HBS1L    | 544  | 622   | 6.52598034897      |
| NM_001145207 | HBS1L    | 468  | 540   | 5.9410178558       |
| NM_001145206 | KIAA1671 |      | 8024  | 8055 9.19688091611 |
| NM_001145206 | KIAA1671 |      | 9861  | 9909 11.2008985163 |
| NM_001145206 | KIAA1671 |      | 6400  | 6437 9.1167593069  |
| NM_001145206 | KIAA1671 |      | 5887  | 5983 11.785861017  |
| NM_001145206 | KIAA1671 |      | 3255  | 3316 9.20089851606 |
| NM_001145206 | KIAA1671 |      | 9055  | 9107 10.1167593069 |
| NM_001145206 | KIAA1671 |      | 3351  | 3393 11.2008985087 |
| NM_001145206 | KIAA1671 |      | 6823  | 6868 10.7818434168 |
| NM_001145206 | KIAA1671 |      | 9198  | 9237 9.1167593069  |
| NM_001145206 | KIAA1671 |      | 6039  | 6126 10.2008985163 |
| NM_001145206 | KIAA1671 |      | 10063 | 10116 9.1167593069 |
| NM_001145206 | KIAA1671 |      | 9661  | 9740 10.1968809161 |
| NM_001145206 | KIAA1671 |      | 8801  | 8919 11.2008985163 |
| NM_001145206 | KIAA1671 |      | 9494  | 9536 9.19688091611 |
| NM_014494    | TNRC6A   | 4728 | 4782  | 6.64099675927      |
| NM_014494    | TNRC6A   | 7008 | 7081  | 5.64116377853      |
| NM_014494    | TNRC6A   | 7186 | 7277  | 7.64117050959      |
| NM_014494    | TNRC6A   | 8267 | 8329  | 7.22613277439      |

|              |        |      |      |               |
|--------------|--------|------|------|---------------|
| NM_014494    | TNRC6A | 6335 | 6418 | 8.22613301031 |
| NM_014494    | TNRC6A | 6540 | 6590 | 5.5570313002  |
| NM_014494    | TNRC6A | 6231 | 6289 | 5.64099675927 |
| NM_014494    | TNRC6A | 2168 | 2280 | 7.64117050959 |
| NM_014494    | TNRC6A | 4629 | 4697 | 6.64099675927 |
| NM_014494    | TNRC6A | 5765 | 5810 | 5.64099675927 |
| NM_014494    | TNRC6A | 4790 | 4863 | 5.64099675927 |
| NM_014494    | TNRC6A | 7936 | 8018 | 7.22613301009 |
| NM_014494    | TNRC6A | 1686 | 1773 | 5.63715290941 |
| NM_014494    | TNRC6A | 7768 | 7914 | 7.64117050959 |
| NM_207009    | FAM45A | 57   | 129  | 5.4845387893  |
| NM_018285    | IMP3   | 884  | 947  | 8.14825510381 |
| NM_018285    | IMP3   | 801  | 837  | 7.06411589443 |
| NM_018285    | IMP3   | 376  | 477  | 8.14825510381 |
| NM_005228    | EGFR   | 4697 | 4784 | 8.68874587619 |
| NM_005228    | EGFR   | 275  | 337  | 7.10378337547 |
| NM_005228    | EGFR   | 5121 | 5191 | 9.10378337547 |
| NM_005228    | EGFR   | 744  | 918  | 9.91113829753 |
| NM_005228    | EGFR   | 4089 | 4142 | 8.10378337525 |
| NM_005228    | EGFR   | 1127 | 1235 | 9.68874587619 |
| NM_005228    | EGFR   | 3731 | 3784 | 8.68874587619 |
| NM_005228    | EGFR   | 2878 | 2906 | 8.10377664442 |
| NM_005228    | EGFR   | 3787 | 3937 | 9.56321499411 |
| NM_005228    | EGFR   | 978  | 1121 | 9.56321499411 |
| NM_005228    | EGFR   | 3963 | 4084 | 9.56321499411 |
| NM_005228    | EGFR   | 1241 | 1727 | 12.1261511885 |
| NM_005228    | EGFR   | 2769 | 2856 | 9.10378337547 |
| NM_005228    | EGFR   | 4461 | 4669 | 10.1037833755 |
| NM_005228    | EGFR   | 5307 | 5346 | 7.60460666681 |
| NM_005228    | EGFR   | 4175 | 4326 | 9.68874587619 |
| NM_005228    | EGFR   | 2566 | 2766 | 10.1037833755 |
| NM_005228    | EGFR   | 2119 | 2551 | 11.0579796859 |
| NM_005228    | EGFR   | 1750 | 2035 | 10.6887458762 |
| NM_005228    | EGFR   | 4807 | 4913 | 8.42571147036 |
| NM_005228    | EGFR   | 3447 | 3709 | 9.91113829753 |
| NM_005228    | EGFR   | 5047 | 5117 | 6.10378337547 |
| NM_005228    | EGFR   | 2927 | 3442 | 11.6887458762 |
| NM_005228    | EGFR   | 340  | 667  | 11.3517108889 |
| NM_001039802 | CDC42  | 1577 | 1697 | 5.44601857603 |
| NM_001039802 | CDC42  | 298  | 354  | 6.09809527261 |
| NM_001039802 | CDC42  | 240  | 295  | 4.22345240438 |
| NM_001039802 | CDC42  | 948  | 1019 | 2.63866341805 |
| NM_001039802 | CDC42  | 1303 | 1355 | 2.6346460538  |
| NM_001039802 | CDC42  | 2073 | 2146 | 3.63866365397 |
| NM_001039802 | CDC42  | 2152 | 2226 | 4.22362591878 |
| NM_001039802 | CDC42  | 1173 | 1298 | 5.80858865542 |
| NM_001039802 | CDC42  | 363  | 939  | 8.47155366814 |
| NM_001039802 | CDC42  | 1373 | 1464 | 3.63866365397 |
| NM_001039802 | CDC42  | 91   | 153  | 2.63866364642 |
| NM_001039802 | CDC42  | 1811 | 1932 | 3.63866365397 |

|              |        |      |      |               |
|--------------|--------|------|------|---------------|
| NM_001001330 | REEP3  | 2711 | 2782 | 4.27854343259 |
| NM_001001330 | REEP3  | 976  | 1037 | 5.86349920226 |
| NM_001001330 | REEP3  | 476  | 581  | 6.60047152748 |
| NM_001001330 | REEP3  | 747  | 805  | 4.27853670154 |
| NM_001001330 | REEP3  | 3256 | 3292 | 5.27836968227 |
| NM_001001330 | REEP3  | 3348 | 3416 | 5.27853670154 |
| NM_001001330 | REEP3  | 2598 | 2692 | 4.27452583242 |
| NM_001001330 | REEP3  | 254  | 394  | 7.60047152748 |
| NM_014757    | MAML1  | 4508 | 4564 | 8.87644713276 |
| NM_014757    | MAML1  | 940  | 989  | 7.29131761277 |
| NM_014754    | PTDSS1 | 1079 | 1150 | 7.72467002704 |
| NM_014754    | PTDSS1 | 1006 | 1079 | 7.89459502848 |
| NM_014754    | PTDSS1 | 1431 | 1496 | 4.72466329598 |
| NM_014754    | PTDSS1 | 182  | 248  | 7.04659812192 |
| NM_014754    | PTDSS1 | 254  | 351  | 7.89459502848 |
| NM_014754    | PTDSS1 | 2448 | 2525 | 7.72467002704 |
| NM_014754    | PTDSS1 | 1707 | 1757 | 5.72449627672 |
| NM_014754    | PTDSS1 | 2028 | 2090 | 6.72467001949 |
| NM_014754    | PTDSS1 | 1620 | 1676 | 4.72065242686 |
| NM_014754    | PTDSS1 | 1233 | 1424 | 9.42510974518 |
| NM_014754    | PTDSS1 | 353  | 575  | 9.11698744982 |
| NM_014754    | PTDSS1 | 580  | 1002 | 10.2165231234 |
| NM_001190864 | MRPS35 | 1256 | 1291 | 5.20066292853 |
| NM_001190864 | MRPS35 | 244  | 277  | 5.28078453774 |
| NM_001190864 | MRPS35 | 1310 | 1401 | 5.28480213791 |
| NM_001190864 | MRPS35 | 383  | 471  | 6.86976463863 |
| NM_001190864 | MRPS35 | 91   | 145  | 5.86976463841 |
| NM_001190864 | MRPS35 | 623  | 706  | 5.28480213791 |
| NM_001190864 | MRPS35 | 543  | 581  | 5.2848021379  |
| NM_001190864 | MRPS35 | 901  | 970  | 6.28480190199 |
| NM_001190864 | MRPS35 | 1092 | 1179 | 6.86976463863 |
| NM_001190864 | MRPS35 | 1627 | 1676 | 5.86959088831 |
| NM_005224    | ARID3A | 284  | 345  | 3.99368692431 |
| NM_005224    | ARID3A | 2020 | 2078 | 4.99351317399 |
| NM_005224    | ARID3A | 30   | 82   | 6.3156150192  |
| NM_005224    | ARID3A | 1835 | 1930 | 5.57864942503 |
| NM_005224    | ARID3A | 1702 | 1762 | 5.57864942503 |
| NM_005224    | ARID3A | 1442 | 1508 | 4.99368692409 |
| NM_005224    | ARID3A | 1763 | 1824 | 4.99368668839 |
| NM_005224    | ARID3A | 2301 | 2355 | 3.98966932414 |
| NM_005224    | ARID3A | 795  | 851  | 3.90954771492 |
| NM_005224    | ARID3A | 2455 | 2713 | 8.24161443775 |
| NM_005224    | ARID3A | 1095 | 1195 | 6.57864942503 |
| NM_005224    | ARID3A | 937  | 1090 | 6.57864942503 |
| NM_005225    | E2F1   | 1832 | 1882 | 7.72357643092 |
| NM_005225    | E2F1   | 874  | 926  | 4.91622127294 |
| NM_005225    | E2F1   | 807  | 863  | 6.50118400958 |
| NM_005225    | E2F1   | 1088 | 1134 | 5.91622150864 |
| NM_005225    | E2F1   | 2390 | 2480 | 7.50118400958 |
| NM_005225    | E2F1   | 1551 | 1629 | 4.91622150886 |

|              |          |      |      |                   |
|--------------|----------|------|------|-------------------|
| NM_005225    | E2F1     | 982  | 1040 | 6.49716640941     |
| NM_005225    | E2F1     | 1888 | 2035 | 7.72357643092     |
| NM_005225    | E2F1     | 1401 | 1486 | 6.50118400958     |
| NM_005225    | E2F1     | 650  | 765  | 5.91621477781     |
| NM_005225    | E2F1     | 301  | 343  | 4.83208229948     |
| NM_005225    | E2F1     | 1239 | 1295 | 4.91220390869     |
| NM_005225    | E2F1     | 2109 | 2225 | 7.23814960375     |
| NM_005225    | E2F1     | 510  | 625  | 6.91622150886     |
| NM_014750    | DLGAP5   | 2437 | 2547 | 7.08029803177     |
| NM_014750    | DLGAP5   | 1785 | 1820 | 7.0762804316      |
| NM_014750    | DLGAP5   | 1580 | 1631 | 5.99615882239     |
| NM_014750    | DLGAP5   | 1658 | 1760 | 8.40222612666     |
| NM_014750    | DLGAP5   | 2190 | 2260 | 6.08029803177     |
| NM_014750    | DLGAP5   | 2075 | 2133 | 7.66526029658     |
| NM_014750    | DLGAP5   | 307  | 427  | 7.6652605325      |
| NM_014750    | DLGAP5   | 742  | 854  | 7.66526053249     |
| NM_032164    | ZNF394   | 1235 | 1290 | 8.85235274555     |
| NM_032164    | ZNF394   | 1434 | 1478 | 7.85235274555     |
| NM_032168    | WDR75    | 1843 | 1906 | 4.11992961738     |
| NM_032168    | WDR75    | 1706 | 1794 | 7.12394721756     |
| NM_032168    | WDR75    | 1505 | 1596 | 5.70890971828     |
| NM_032168    | WDR75    | 1218 | 1274 | 5.11992961738     |
| NM_032168    | WDR75    | 969  | 1036 | 5.6247705089      |
| NM_032168    | WDR75    | 1369 | 1443 | 5.70489211811     |
| NM_032168    | WDR75    | 82   | 144  | 4.1239404865      |
| NM_032168    | WDR75    | 210  | 260  | 5.11992961738     |
| NM_032168    | WDR75    | 271  | 415  | 7.12394721756     |
| NM_032168    | WDR75    | 2317 | 2402 | 4.12377346724     |
| NM_032168    | WDR75    | 2449 | 2543 | 5.12394721756     |
| NM_032168    | WDR75    | 2563 | 2641 | 5.70890971828     |
| NM_032806    | C3orf39  | 1412 | 1462 | 10.8669572865     |
| NM_018691    | FAM114A2 |      | 594  | 638 7.67657769348 |
| NM_018697    | LANCL2   | 935  | 992  | 6.58244457691     |
| NM_018697    | LANCL2   | 792  | 842  | 6.49847911784     |
| NM_018697    | LANCL2   | 1958 | 2076 | 7.58261832723     |
| NM_018695    | ERBB2IP  | 4703 | 4764 | 6.42730421042     |
| NM_018695    | ERBB2IP  | 2263 | 2353 | 6.43132181037     |
| NM_018695    | ERBB2IP  | 1813 | 1856 | 6.42730421042     |
| NM_018695    | ERBB2IP  | 3651 | 3696 | 6.42730421042     |
| NM_018695    | ERBB2IP  | 602  | 632  | 6.42730421042     |
| NM_018695    | ERBB2IP  | 4120 | 4183 | 6.34718260121     |
| NM_018695    | ERBB2IP  | 2658 | 2703 | 8.016110561       |
| NM_018695    | ERBB2IP  | 3    | 54   | 6.43132157468     |
| NM_018695    | ERBB2IP  | 896  | 973  | 8.43132180305     |
| NM_018695    | ERBB2IP  | 1346 | 1407 | 7.42730421042     |
| NM_018695    | ERBB2IP  | 3492 | 3536 | 6.34718260121     |
| NM_001171991 | HCCS     | 793  | 872  | 7.09417267694     |
| NM_001171991 | HCCS     | 718  | 746  | 4.68810537267     |
| NM_014458    | KLHL20   | 2329 | 2428 | 8.05462468829     |
| NM_001123363 | RGPD6    | 4877 | 4919 | 6.81290829282     |

|              |             |      |      |                   |
|--------------|-------------|------|------|-------------------|
| NM_001123363 | RGPD6       | 6485 | 6547 | 6.81691916194     |
| NM_001123363 | RGPD6       | 989  | 1094 | 8.81692589299     |
| NM_001123363 | RGPD6       | 3574 | 3659 | 7.81692589299     |
| NM_001123363 | RGPD6       | 2170 | 2211 | 6.73278668361     |
| NM_001123363 | RGPD6       | 3058 | 3093 | 7.73278668361     |
| NM_001123363 | RGPD6       | 1164 | 1213 | 7.81692588544     |
| NM_001123363 | RGPD6       | 1522 | 1590 | 8.81692589299     |
| NM_001123363 | RGPD6       | 2508 | 2575 | 8.81692589299     |
| NM_001123363 | RGPD6       | 2114 | 2157 | 7.81290829282     |
| NM_001123363 | RGPD6       | 2767 | 2821 | 6.81290829282     |
| NM_001123363 | RGPD6       | 4830 | 4871 | 6.73278668361     |
| NM_001123363 | RGPD6       | 2587 | 2722 | 8.81692589299     |
| NM_001123363 | RGPD6       | 4063 | 4148 | 6.81692588544     |
| NM_001153552 | SC0C        | 598  | 654  | 5.45550683042     |
| NM_001153552 | SC0C        | 243  | 296  | 5.37538522121     |
| NM_001204158 | SPHK2       | 958  | 1005 | 10.8124456058     |
| NM_001204158 | SPHK2       | 2488 | 2560 | 11.8164632058     |
| NM_001204158 | SPHK2       | 1296 | 1346 | 9.81244560585     |
| NM_001204158 | SPHK2       | 1424 | 1479 | 10.8162894557     |
| NM_001204158 | SPHK2       | 2685 | 2727 | 10.8164629701     |
| NM_001204158 | SPHK2       | 2309 | 2370 | 9.8162894557      |
| NM_001204158 | SPHK2       | 748  | 833  | 9.81646320602     |
| NM_001204158 | SPHK2       | 1081 | 1242 | 12.816463206      |
| NM_001129900 | ZNF673      | 156  | 208  | 7.14354800702     |
| NM_001204401 | XIAP        | 1802 | 1878 | 8.49485345863     |
| NM_001204401 | XIAP        | 137  | 202  | 9.81678155374     |
| NM_001204401 | XIAP        | 6962 | 6997 | 7.49485345886     |
| NM_001204401 | XIAP        | 6489 | 6545 | 8.49467970854     |
| NM_001204401 | XIAP        | 7806 | 7844 | 7.49467970854     |
| NM_001204401 | XIAP        | 1152 | 1195 | 8.41071424947     |
| NM_001204151 | MBD1        | 475  | 569  | 9.01198011483     |
| NM_001204151 | MBD1        | 10   | 121  | 8.59693588449     |
| NM_001204151 | MBD1        | 143  | 230  | 9.01198010728     |
| NM_001040439 | MAPK8IP3    |      | 282  | 342 5.55173874874 |
| NM_032704    | TUBA1C      | 0    | 83   | 7.38230419781     |
| NM_032704    | TUBA1C      | 86   | 246  | 7.38230419781     |
| NM_032704    | TUBA1C      | 1123 | 1542 | 9.40783928992     |
| NM_032704    | TUBA1C      | 260  | 1099 | 10.7348206125     |
| NM_016167    | NOL7        | 808  | 852  | 3.70891104483     |
| NM_016167    | NOL7        | 455  | 504  | 5.29404728832     |
| NM_016167    | NOL7        | 737  | 797  | 4.70891104483     |
| NM_001040666 | STEAP2      | 1350 | 1449 | 12.0547984384     |
| NM_001040664 | PPAN-P2RY11 |      | 418  | 459 7.0858843198  |
| NM_001098625 | JKAMP       | 599  | 663  | 11.2533240581     |
| NM_001098625 | JKAMP       | 445  | 532  | 10.6683615574     |
| NM_001098625 | JKAMP       | 782  | 919  | 11.6683615574     |
| NM_001098625 | JKAMP       | 229  | 343  | 10.4053271516     |
| NM_001098625 | JKAMP       | 995  | 1076 | 9.08339905669     |
| NM_022744    | C16orf58    |      | 306  | 347 4.11711383946 |
| NM_022744    | C16orf58    |      | 869  | 909 4.11711360377 |



|              |          |      |      |               |
|--------------|----------|------|------|---------------|
| NM_022744    | C16orf58 | 2252 | 2294 | 4.11710710863 |
| NM_022744    | C16orf58 | 584  | 641  | 6.11694008937 |
| NM_022744    | C16orf58 | 937  | 1013 | 5.11711360377 |
| NM_022744    | C16orf58 | 2537 | 2622 | 5.11711383969 |
| NM_022744    | C16orf58 | 443  | 580  | 5.11711383969 |
| NM_022745    | ATPAF1   | 822  | 1006 | 6.93696386356 |
| NM_022746    | MOSC1    | 1814 | 1856 | 9.14642112414 |
| NM_022746    | MOSC1    | 1454 | 1554 | 7.56145863097 |
| NM_022746    | MOSC1    | 2093 | 2138 | 9.14642113169 |
| NM_022746    | MOSC1    | 1385 | 1430 | 9.14642112414 |
| NM_022746    | MOSC1    | 1956 | 2043 | 8.56145863096 |
| NM_022746    | MOSC1    | 1165 | 1210 | 8.5574410308  |
| NM_022746    | MOSC1    | 979  | 1070 | 8.56145863097 |
| NM_022746    | MOSC1    | 520  | 670  | 9.88338672586 |
| NM_022746    | MOSC1    | 828  | 931  | 8.56145863097 |
| NM_022037    | TIA1     | 3327 | 3384 | 6.93248668441 |
| NM_022037    | TIA1     | 676  | 757  | 4.12111416217 |
| NM_022037    | TIA1     | 3705 | 3777 | 4.12513176213 |
| NM_022037    | TIA1     | 120  | 175  | 5.12111416217 |
| NM_022037    | TIA1     | 2071 | 2119 | 4.12111416217 |
| NM_022037    | TIA1     | 820  | 906  | 5.12513152643 |
| NM_022037    | TIA1     | 1774 | 1865 | 5.12513176235 |
| NM_022037    | TIA1     | 254  | 349  | 6.71009426307 |
| NM_001142685 | ARHGAP32 | 5793 | 5835 | 10.0510112089 |
| NM_001142685 | ARHGAP32 | 142  | 222  | 8.9708895997  |
| NM_022039    | FBXW4    | 1272 | 1329 | 7.44365365883 |
| NM_022039    | FBXW4    | 532  | 606  | 6.85468028899 |
| NM_022039    | FBXW4    | 1118 | 1195 | 5.85869115811 |
| NM_022039    | FBXW4    | 1509 | 1588 | 6.85852413884 |
| NM_022748    | TNS3     | 6531 | 6621 | 9.17745930689 |
| NM_022748    | TNS3     | 4853 | 4932 | 8.76242180761 |
| NM_022748    | TNS3     | 6329 | 6381 | 6.17728555657 |
| NM_022748    | TNS3     | 3063 | 3130 | 7.76242180761 |
| NM_022748    | TNS3     | 4665 | 4741 | 6.17745930689 |
| NM_022748    | TNS3     | 7336 | 7395 | 6.17344170672 |
| NM_022748    | TNS3     | 4773 | 4847 | 7.17745930689 |
| NM_022748    | TNS3     | 250  | 294  | 6.17745257584 |
| NM_022748    | TNS3     | 5624 | 5663 | 8.17745907097 |
| NM_022748    | TNS3     | 3273 | 3359 | 7.7622480573  |
| NM_022748    | TNS3     | 295  | 371  | 8.49921365146 |
| NM_022748    | TNS3     | 2981 | 3051 | 7.17745930689 |
| NM_022748    | TNS3     | 6944 | 6984 | 6.09332009751 |
| NM_022748    | TNS3     | 6629 | 6699 | 6.17745257584 |
| NM_022748    | TNS3     | 1893 | 1945 | 6.17745930667 |
| NM_022748    | TNS3     | 6054 | 6132 | 6.17745930667 |
| NM_022748    | TNS3     | 1413 | 1455 | 7.17728555657 |
| NM_022748    | TNS3     | 4595 | 4637 | 7.76242180006 |
| NM_022748    | TNS3     | 7540 | 7594 | 7.7622480573  |
| NM_022748    | TNS3     | 4472 | 4512 | 7.76242157169 |
| NM_022748    | TNS3     | 5952 | 6036 | 7.17745930689 |

|              |          |       |       |                    |
|--------------|----------|-------|-------|--------------------|
| NM_022748    | TNS3     | 399   | 452   | 8.49938740178      |
| NM_022748    | TNS3     | 3763  | 3820  | 6.17745907097      |
| NM_022748    | TNS3     | 1262  | 1396  | 8.49938740178      |
| NM_022748    | TNS3     | 1495  | 1574  | 8.17745930689      |
| NM_022748    | TNS3     | 1084  | 1150  | 7.17745929934      |
| NM_022748    | TNS3     | 6197  | 6226  | 6.09332009751      |
| NM_022748    | TNS3     | 7408  | 7510  | 9.63689092553      |
| NM_022748    | TNS3     | 5170  | 5225  | 6.17745907097      |
| NM_022748    | TNS3     | 1614  | 1845  | 9.98481422895      |
| NM_022748    | TNS3     | 3821  | 3982  | 9.17745930689      |
| NM_022748    | TNS3     | 1950  | 2037  | 8.49938740178      |
| NM_022748    | TNS3     | 4284  | 4411  | 7.76242180761      |
| NM_022748    | TNS3     | 480   | 614   | 8.76242180761      |
| NM_022748    | TNS3     | 99    | 229   | 8.17745930689      |
| NM_022748    | TNS3     | 1156  | 1244  | 8.49938740178      |
| NM_022748    | TNS3     | 5695  | 5766  | 7.17728555657      |
| NM_022748    | TNS3     | 2791  | 2868  | 7.17745930689      |
| NM_022748    | TNS3     | 3992  | 4141  | 7.76242180761      |
| NM_022748    | TNS3     | 820   | 998   | 9.34738430833      |
| NM_022749    | FAM160B2 |       | 1904  | 1988 7.9532727856  |
| NM_022749    | FAM160B2 |       | 1773  | 1818 7.95711663546 |
| NM_001008405 | BCAP29   | 653   | 704   | 7.43638234062      |
| NM_001008405 | BCAP29   | 119   | 167   | 7.11446074086      |
| NM_001008405 | BCAP29   | 238   | 294   | 6.11446097678      |
| NM_001008405 | BCAP29   | 186   | 235   | 6.69942347728      |
| NM_001008405 | BCAP29   | 9     | 90    | 7.11446097678      |
| NM_001008405 | BCAP29   | 321   | 461   | 8.43638907167      |
| NM_001008405 | BCAP29   | 487   | 617   | 6.11446097678      |
| NM_001008401 | ZNF761   | 3872  | 3972  | 7.86356293092      |
| NM_001008401 | ZNF761   | 62    | 138   | 6.86356293092      |
| NM_001008401 | ZNF761   | 484   | 608   | 7.44852543164      |
| NM_001008401 | ZNF761   | 1711  | 1854  | 8.18549102581      |
| NM_015409    | EP400    | 5781  | 5849  | 6.32933625209      |
| NM_015409    | EP400    | 7237  | 7293  | 7.41347545392      |
| NM_015409    | EP400    | 2917  | 2954  | 6.4094578613       |
| NM_015409    | EP400    | 1306  | 1355  | 8.41346873042      |
| NM_015409    | EP400    | 2759  | 2852  | 6.41347546147      |
| NM_015409    | EP400    | 3765  | 3830  | 7.99843796197      |
| NM_015409    | EP400    | 10727 | 10794 | 6.41330171115      |
| NM_015409    | EP400    | 2318  | 2358  | 6.32933625209      |
| NM_015409    | EP400    | 6282  | 6315  | 7.4094578613       |
| NM_015409    | EP400    | 11726 | 11762 | 6.32933625209      |
| NM_015409    | EP400    | 5468  | 5522  | 7.41330171115      |
| NM_015409    | EP400    | 11348 | 11422 | 7.99843772627      |
| NM_015409    | EP400    | 286   | 321   | 6.4094578613       |
| NM_015409    | EP400    | 9788  | 9879  | 6.41347546147      |
| NM_015409    | EP400    | 4102  | 4151  | 6.4094578613       |
| NM_015409    | EP400    | 7528  | 7566  | 6.32933625209      |
| NM_015409    | EP400    | 2183  | 2247  | 6.4094578613       |
| NM_015409    | EP400    | 3324  | 3411  | 7.99843796197      |

|           |          |       |       |                    |
|-----------|----------|-------|-------|--------------------|
| NM_015409 | EP400    | 6123  | 6232  | 8.41347546147      |
| NM_015409 | EP400    | 6437  | 6516  | 6.4094578613       |
| NM_015409 | EP400    | 2360  | 2446  | 7.41347545392      |
| NM_015409 | EP400    | 2087  | 2171  | 7.99843796197      |
| NM_015409 | EP400    | 11938 | 12015 | 7.41346873042      |
| NM_015156 | RCOR1    | 3265  | 3309  | 5.54796815741      |
| NM_015156 | RCOR1    | 2676  | 2716  | 6.63210736679      |
| NM_015156 | RCOR1    | 2107  | 2148  | 5.54796815741      |
| NM_015156 | RCOR1    | 3850  | 3902  | 6.63210063574      |
| NM_015156 | RCOR1    | 4693  | 4734  | 5.54796815741      |
| NM_015156 | RCOR1    | 4508  | 4563  | 5.62808976662      |
| NM_015156 | RCOR1    | 2329  | 2408  | 5.54796815741      |
| NM_015156 | RCOR1    | 2621  | 2674  | 5.63210063574      |
| NM_015155 | LARP4B   | 1479  | 1547  | 7.00002517347      |
| NM_015155 | LARP4B   | 2718  | 2774  | 6.00001844242      |
| NM_015155 | LARP4B   | 1081  | 1144  | 7.99985142315      |
| NM_015155 | LARP4B   | 917   | 994   | 8.58498767419      |
| NM_015155 | LARP4B   | 786   | 864   | 7.58498766664      |
| NM_015155 | LARP4B   | 2819  | 2904  | 7.00002517347      |
| NM_015155 | LARP4B   | 1284  | 1356  | 8.00002493755      |
| NM_015155 | LARP4B   | 297   | 369   | 8.00002517347      |
| NM_015155 | LARP4B   | 5784  | 5827  | 5.9960075733       |
| NM_015155 | LARP4B   | 3301  | 3396  | 7.00002517347      |
| NM_015155 | LARP4B   | 645   | 736   | 8.32195326836      |
| NM_015155 | LARP4B   | 1944  | 2085  | 7.00002517347      |
| NM_015155 | LARP4B   | 3926  | 4052  | 6.00002517347      |
| NM_015155 | LARP4B   | 3413  | 3584  | 8.32195326836      |
| NM_015155 | LARP4B   | 1610  | 1788  | 8.32195326836      |
| NM_015155 | LARP4B   | 3757  | 3893  | 8.00002517347      |
| NM_015155 | LARP4B   | 4188  | 4334  | 8.00002517347      |
| NM_015154 | MESDC2   | 224   | 313   | 6.01571323064      |
| NM_015154 | MESDC2   | 1076  | 1161  | 5.01571323064      |
| NM_015154 | MESDC2   | 1232  | 1283  | 5.7526788248       |
| NM_015154 | MESDC2   | 100   | 152   | 6.01571323063      |
| NM_015154 | MESDC2   | 1342  | 1407  | 5.43075072992      |
| NM_015154 | MESDC2   | 382   | 458   | 5.7526788248       |
| NM_015154 | MESDC2   | 734   | 851   | 5.01571323064      |
| NM_015154 | MESDC2   | 505   | 652   | 7.13119044806      |
| NM_015154 | MESDC2   | 966   | 1076  | 6.43075072992      |
| NM_015153 | PHF3     | 6509  | 6588  | 4.52306296787      |
| NM_015153 | PHF3     | 4008  | 4086  | 4.52707383699      |
| NM_015153 | PHF3     | 4369  | 4447  | 5.11204306876      |
| NM_015153 | PHF3     | 94    | 164   | 3.52306296787      |
| NM_015153 | PHF3     | 3594  | 3661  | 5.11203633771      |
| NM_015153 | PHF3     | 2115  | 2176  | 3.44294135866      |
| NM_015153 | PHF3     | 1172  | 1246  | 3.52690681772      |
| NM_015153 | PHF3     | 2236  | 2315  | 5.52708056804      |
| NM_020890 | KIAA1524 |       | 2093  | 2155 6.41036888794 |
| NM_020890 | KIAA1524 |       | 424   | 482 8.3262296861   |
| NM_020890 | KIAA1524 |       | 1658  | 1734 6.41036889549 |

|              |          |      |      |      |               |
|--------------|----------|------|------|------|---------------|
| NM_020890    | KIAA1524 |      | 3270 | 3359 | 7.41036889549 |
| NM_020890    | KIAA1524 |      | 1775 | 1879 | 8.73229699038 |
| NM_020890    | KIAA1524 |      | 762  | 880  | 8.41036865957 |
| NM_020894    | KIAA1530 |      | 4445 | 4523 | 9.09046644117 |
| NM_020894    | KIAA1530 |      | 3857 | 3921 | 9.09047317222 |
| NM_020894    | KIAA1530 |      | 3511 | 3540 | 8.00633396284 |
| NM_020898    | CALCOC01 |      | 2371 | 2410 | 4.99135883734 |
| NM_020899    | ZBTB4    | 3753 | 3811 |      | 10.4613051133 |
| NM_020899    | ZBTB4    | 5490 | 5534 |      | 11.7834002275 |
| NM_020899    | ZBTB4    | 5563 | 5632 |      | 9.46147886363 |
| NM_019070    | DDX49    | 1231 | 1282 |      | 6.42949133067 |
| NM_019070    | DDX49    | 72   | 200  |      | 8.43350893085 |
| NM_019070    | DDX49    | 365  | 419  |      | 6.43350219979 |
| NM_019070    | DDX49    | 564  | 624  |      | 6.34936972146 |
| NM_019070    | DDX49    | 746  | 822  |      | 6.43350893063 |
| NM_019071    | ING3     | 1115 | 1173 |      | 7.96494052224 |
| NM_019072    | SGTB     | 2647 | 2681 |      | 6.84918963448 |
| NM_018358    | ABCF3    | 856  | 904  |      | 6.62947965744 |
| NM_018358    | ABCF3    | 411  | 471  |      | 7.12865613019 |
| NM_018358    | ABCF3    | 2367 | 2433 |      | 5.04451715672 |
| NM_018358    | ABCF3    | 1925 | 1971 |      | 5.12463876593 |
| NM_018358    | ABCF3    | 2032 | 2119 |      | 5.12865635856 |
| NM_018358    | ABCF3    | 1640 | 1760 |      | 7.45058446099 |
| NM_018359    | UFSP2    | 313  | 369  |      | 7.17313806697 |
| NM_018359    | UFSP2    | 1000 | 1059 |      | 7.25727704044 |
| NM_001178101 | ZNF37A   | 5379 | 5415 |      | 9.08719694956 |
| NM_001178101 | ZNF37A   | 5792 | 5852 |      | 8.09121454973 |
| NM_001178101 | ZNF37A   | 3436 | 3472 |      | 8.00707534035 |
| NM_018356    | C5orf22  | 668  | 721  |      | 8.6682864016  |
| NM_018356    | C5orf22  | 977  | 1061 |      | 7.66426903734 |
| NM_018356    | C5orf22  | 1582 | 1699 |      | 8.9902147324  |
| NM_018356    | C5orf22  | 761  | 829  |      | 6.66827990646 |
| NM_016497    | MRPL51   | 448  | 509  |      | 6.09102315142 |
| NM_016497    | MRPL51   | 515  | 656  |      | 6.4535932308  |
| NM_016497    | MRPL51   | 110  | 386  |      | 7.19055882497 |
| NM_001305    | CLDN4    | 904  | 1027 |      | 10.0052009123 |
| NM_001305    | CLDN4    | 354  | 414  |      | 9.50602420366 |
| NM_001305    | CLDN4    | 186  | 278  |      | 10.590163413  |
| NM_001305    | CLDN4    | 1338 | 1407 |      | 8.00520090478 |
| NM_001305    | CLDN4    | 645  | 725  |      | 10.0052009123 |
| NM_001304    | CPD      | 3367 | 3436 |      | 8.56212511477 |
| NM_001304    | CPD      | 7059 | 7104 |      | 6.10269349613 |
| NM_001304    | CPD      | 5397 | 5451 |      | 7.10269349613 |
| NM_001304    | CPD      | 3859 | 4027 |      | 9.91004841819 |
| NM_001304    | CPD      | 473  | 531  |      | 7.10269349613 |
| NM_001304    | CPD      | 6808 | 6873 |      | 7.10269349613 |
| NM_001304    | CPD      | 6311 | 6364 |      | 7.10269349613 |
| NM_001304    | CPD      | 3297 | 3360 |      | 7.91004841819 |
| NM_001304    | CPD      | 6950 | 7057 |      | 8.56212511477 |
| NM_001304    | CPD      | 73   | 211  |      | 7.68765599685 |

|           |        |      |      |               |
|-----------|--------|------|------|---------------|
| NM_001304 | CPD    | 6366 | 6477 | 7.42462159102 |
| NM_001304 | CPD    | 7194 | 7256 | 7.10269349613 |
| NM_001304 | CPD    | 7960 | 8016 | 5.10269326021 |
| NM_001304 | CPD    | 6576 | 6655 | 7.10269349591 |
| NM_001304 | CPD    | 370  | 411  | 5.01855428675 |
| NM_001304 | CPD    | 221  | 272  | 7.10269349613 |
| NM_001304 | CPD    | 3794 | 3823 | 6.09867589596 |
| NM_001304 | CPD    | 5824 | 6096 | 9.00958409174 |
| NM_001304 | CPD    | 6873 | 6936 | 7.68765599685 |
| NM_001304 | CPD    | 303  | 370  | 5.10269348858 |
| NM_001304 | CPD    | 8540 | 8588 | 6.01855428675 |
| NM_001304 | CPD    | 4557 | 4650 | 6.10269349613 |
| NM_001304 | CPD    | 6701 | 6802 | 7.10269349613 |
| NM_001304 | CPD    | 682  | 735  | 6.10269326021 |
| NM_001304 | CPD    | 547  | 663  | 6.68765599685 |
| NM_001304 | CPD    | 2784 | 3290 | 11.6418523072 |
| NM_001304 | CPD    | 2493 | 2669 | 9.68765599685 |
| NM_001304 | CPD    | 7539 | 7649 | 7.10269349613 |
| NM_001304 | CPD    | 7871 | 7958 | 6.10269349613 |
| NM_001304 | CPD    | 4688 | 4844 | 7.10269349613 |
| NM_001304 | CPD    | 5567 | 5660 | 7.91004841819 |
| NM_001304 | CPD    | 955  | 1591 | 11.5945465925 |
| NM_001304 | CPD    | 1591 | 2481 | 12.1795090932 |
| NM_001304 | CPD    | 5008 | 5376 | 9.96067449126 |
| NM_001304 | CPD    | 6160 | 6273 | 7.10269349613 |
| NM_001304 | CPD    | 4457 | 4518 | 6.68765599685 |
| NM_001304 | CPD    | 749  | 912  | 9.68765599685 |
| NM_001304 | CPD    | 4027 | 4190 | 8.42462159102 |
| NM_001304 | CPD    | 2689 | 2773 | 6.68765599685 |
| NM_001304 | CPD    | 7351 | 7477 | 8.10269349613 |
| NM_001304 | CPD    | 3479 | 3794 | 10.2726184976 |
| NM_001304 | CPD    | 4865 | 5003 | 8.27261849757 |
| NM_001304 | CPD    | 4239 | 4432 | 9.19015633738 |
| NM_016492 | RANGRF | 202  | 299  | 5.69072633406 |
| NM_030628 | INTS5  | 158  | 192  | 12.425382309  |
| NM_030628 | INTS5  | 1857 | 1911 | 13.0103448097 |
| NM_030628 | INTS5  | 692  | 759  | 13.0944837831 |
| NM_030628 | INTS5  | 1914 | 1977 | 12.509347768  |
| NM_030628 | INTS5  | 245  | 290  | 12.5095215181 |
| NM_030628 | INTS5  | 3048 | 3128 | 12.5095147873 |
| NM_030628 | INTS5  | 1503 | 1608 | 13.0944840191 |
| NM_030628 | INTS5  | 832  | 915  | 13.094477288  |
| NM_030629 | CMIP   | 2808 | 2861 | 4.61855537368 |
| NM_030629 | CMIP   | 3113 | 3173 | 4.62239922353 |
| NM_030629 | CMIP   | 3407 | 3473 | 6.20736172425 |
| NM_030629 | CMIP   | 1217 | 1274 | 4.62257297363 |
| NM_030629 | CMIP   | 2936 | 3044 | 7.20753547457 |
| NM_030629 | CMIP   | 1616 | 1676 | 4.62257273793 |
| NM_030629 | CMIP   | 138  | 181  | 4.61855537368 |
| NM_030629 | CMIP   | 385  | 428  | 5.6225662428  |

|           |        |      |      |               |
|-----------|--------|------|------|---------------|
| NM_030629 | CMIP   | 3480 | 3548 | 4.62239922353 |
| NM_030629 | CMIP   | 3799 | 3844 | 4.62257297363 |
| NM_030629 | CMIP   | 530  | 627  | 4.6225662428  |
| NM_030629 | CMIP   | 1151 | 1217 | 5.6225662428  |
| NM_030629 | CMIP   | 1887 | 1990 | 6.6225729663  |
| NM_030624 | KLHL15 | 837  | 892  | 9.42638416009 |
| NM_030624 | KLHL15 | 1048 | 1089 | 8.92538711843 |
| NM_030627 | CPEB4  | 5519 | 5588 | 9.51483432743 |
| NM_030627 | CPEB4  | 3745 | 3836 | 7.92969807639 |
| NM_030627 | CPEB4  | 7334 | 7374 | 7.84573261733 |
| NM_030627 | CPEB4  | 5595 | 5656 | 9.51483431988 |
| NM_030627 | CPEB4  | 3981 | 4036 | 8.92585422654 |
| NM_030621 | DICER1 | 5222 | 5309 | 6.4720609461  |
| NM_030621 | DICER1 | 6736 | 6784 | 6.47205421505 |
| NM_030621 | DICER1 | 2056 | 2124 | 5.88692469507 |
| NM_030621 | DICER1 | 3665 | 3775 | 6.47206094611 |
| NM_030621 | DICER1 | 4336 | 4376 | 4.802959236   |
| NM_030621 | DICER1 | 1373 | 1418 | 6.47188719579 |
| NM_030621 | DICER1 | 2327 | 2416 | 6.47206094611 |
| NM_030621 | DICER1 | 2916 | 3028 | 5.88709844516 |
| NM_030621 | DICER1 | 9549 | 9609 | 5.88709844516 |
| NM_030621 | DICER1 | 1024 | 1113 | 5.88709844539 |
| NM_030621 | DICER1 | 8917 | 8951 | 5.88308084521 |
| NM_030621 | DICER1 | 1225 | 1282 | 5.88709171433 |
| NM_030621 | DICER1 | 2561 | 2607 | 4.802959236   |
| NM_030621 | DICER1 | 4770 | 4836 | 5.88709844539 |
| NM_030621 | DICER1 | 3258 | 3306 | 6.47205421505 |
| NM_030621 | DICER1 | 1613 | 1658 | 4.88308084521 |
| NM_030621 | DICER1 | 4408 | 4457 | 6.47188719579 |
| NM_030621 | DICER1 | 9091 | 9155 | 4.88308084521 |
| NM_030621 | DICER1 | 536  | 608  | 4.88709820947 |
| NM_030621 | DICER1 | 7449 | 7558 | 6.47206094611 |
| NM_030621 | DICER1 | 2727 | 2819 | 4.88709844539 |
| NM_030621 | DICER1 | 5849 | 5953 | 5.88709844538 |
| NM_030621 | DICER1 | 4165 | 4217 | 5.88308084521 |
| NM_030621 | DICER1 | 9242 | 9378 | 6.47206094611 |
| NM_030621 | DICER1 | 3334 | 3447 | 6.47206071019 |
| NM_030621 | DICER1 | 4468 | 4524 | 5.802959236   |
| NM_030621 | DICER1 | 8499 | 8588 | 6.88709844539 |
| NM_030621 | DICER1 | 4920 | 5007 | 4.88692469507 |
| NM_030621 | DICER1 | 8735 | 8856 | 5.88709844539 |
| NM_030621 | DICER1 | 4836 | 4914 | 4.802959236   |
| NM_021215 | RPRD1B | 400  | 465  | 3.67529605757 |
| NM_021215 | RPRD1B | 1692 | 1720 | 5.17611958483 |
| NM_021215 | RPRD1B | 2766 | 2817 | 3.59115708411 |
| NM_021215 | RPRD1B | 1504 | 1572 | 5.67529628594 |
| NM_021215 | RPRD1B | 3486 | 3539 | 5.59115708411 |
| NM_021215 | RPRD1B | 824  | 934  | 5.26025879421 |
| NM_021215 | RPRD1B | 2910 | 3061 | 5.67529629349 |
| NM_021215 | RPRD1B | 2245 | 2283 | 3.67127869332 |

|           |         |      |      |               |
|-----------|---------|------|------|---------------|
| NM_021213 | PCTP    | 231  | 294  | 3.45137269765 |
| NM_021218 | C9orf80 | 326  | 370  | 9.98017864679 |
| NM_019556 | MOSPD1  | 1824 | 1875 | 11.1983726533 |
| NM_019556 | MOSPD1  | 1776 | 1820 | 9.61341015261 |
| NM_019556 | MOSPD1  | 1399 | 1444 | 9.5332885434  |
| NM_019556 | MOSPD1  | 1889 | 1944 | 10.6174275169 |
| NM_019556 | MOSPD1  | 352  | 450  | 10.6174277452 |
| NM_019556 | MOSPD1  | 2119 | 2251 | 11.6174277528 |
| NM_021079 | NMT1    | 4721 | 4785 | 5.10253993246 |
| NM_021079 | NMT1    | 3048 | 3149 | 4.51757743174 |
| NM_021079 | NMT1    | 4294 | 4345 | 3.51740368143 |
| NM_021079 | NMT1    | 2780 | 2861 | 6.3249323538  |
| NM_021079 | NMT1    | 2683 | 2747 | 5.10253993247 |
| NM_021079 | NMT1    | 1662 | 1729 | 6.10253993247 |
| NM_021079 | NMT1    | 1744 | 1793 | 5.10236618215 |
| NM_021079 | NMT1    | 106  | 153  | 3.51740368143 |
| NM_021079 | NMT1    | 592  | 641  | 3.51355983157 |
| NM_021079 | NMT1    | 1606 | 1647 | 3.51757070069 |
| NM_021079 | NMT1    | 3738 | 3800 | 4.51757719583 |
| NM_021079 | NMT1    | 645  | 701  | 5.51757742419 |
| NM_021079 | NMT1    | 3285 | 3349 | 6.3249323538  |
| NM_021079 | NMT1    | 2627 | 2680 | 4.51757743174 |
| NM_021079 | NMT1    | 2248 | 2290 | 4.51757070069 |
| NM_021079 | NMT1    | 2167 | 2218 | 4.51757070069 |
| NM_021079 | NMT1    | 1927 | 1999 | 5.10253320141 |
| NM_021079 | NMT1    | 3807 | 3888 | 4.51757743174 |
| NM_021079 | NMT1    | 486  | 579  | 5.51757743174 |
| NM_021079 | NMT1    | 1502 | 1574 | 3.51757742419 |
| NM_021079 | NMT1    | 235  | 344  | 3.51757070069 |
| NM_021079 | NMT1    | 1191 | 1337 | 6.10253993247 |
| NM_021079 | NMT1    | 1354 | 1443 | 5.10253993247 |
| NM_021079 | NMT1    | 3513 | 3667 | 6.3249323538  |
| NM_021079 | NMT1    | 4080 | 4142 | 4.51757742419 |
| NM_021079 | NMT1    | 2079 | 2157 | 3.51740368143 |
| NM_021079 | NMT1    | 919  | 1083 | 5.83950552663 |
| NM_021078 | KAT2A   | 1820 | 1872 | 6.02510966975 |
| NM_021078 | KAT2A   | 818  | 879  | 7.61007217801 |
| NM_021078 | KAT2A   | 2694 | 2734 | 6.02510967708 |
| NM_021078 | KAT2A   | 2568 | 2639 | 7.02510294625 |
| NM_021078 | KAT2A   | 1931 | 2032 | 6.0251096773  |
| NM_021078 | KAT2A   | 737  | 778  | 6.02493592698 |
| NM_021078 | KAT2A   | 2319 | 2360 | 6.02109207713 |
| NM_021078 | KAT2A   | 2889 | 2952 | 6.02510294625 |
| NM_021078 | KAT2A   | 1765 | 1816 | 7.60605457785 |
| NM_021078 | KAT2A   | 2734 | 2789 | 6.02109207713 |
| NM_021078 | KAT2A   | 546  | 614  | 6.0251096773  |
| NM_021078 | KAT2A   | 1001 | 1045 | 7.60605457785 |
| NM_021078 | KAT2A   | 2367 | 2493 | 7.61007217802 |
| NM_021078 | KAT2A   | 1606 | 1737 | 7.61007217802 |
| NM_021075 | NDUFV3  | 1387 | 1446 | 8.76593803786 |

|              |        |      |      |               |
|--------------|--------|------|------|---------------|
| NM_021074    | NDUFV2 | 685  | 802  | 5.74253344108 |
| NM_021074    | NDUFV2 | 583  | 670  | 4.93517851902 |
| NM_021074    | NDUFV2 | 170  | 294  | 5.52014101974 |
| NM_021074    | NDUFV2 | 449  | 563  | 5.52014101974 |
| NM_173079    | RUNDC1 | 2867 | 2922 | 7.32357801908 |
| NM_173079    | RUNDC1 | 676  | 755  | 8.40771049741 |
| NM_153485    | NUP155 | 3945 | 4032 | 10.6852191146 |
| NM_153485    | NUP155 | 1289 | 1350 | 8.10024988285 |
| NM_153485    | NUP155 | 3003 | 3062 | 8.68521911462 |
| NM_153485    | NUP155 | 1179 | 1246 | 9.90761153596 |
| NM_153485    | NUP155 | 2256 | 2329 | 8.1002566139  |
| NM_153485    | NUP155 | 1503 | 1559 | 9.90761153596 |
| NM_153485    | NUP155 | 2799 | 2859 | 8.1002566139  |
| NM_153485    | NUP155 | 757  | 863  | 9.90761153596 |
| NM_153485    | NUP155 | 1352 | 1401 | 8.1002566139  |
| NM_153485    | NUP155 | 3138 | 3264 | 9.68521911462 |
| NM_153485    | NUP155 | 4177 | 4235 | 9.1002566139  |
| NM_153485    | NUP155 | 4053 | 4167 | 9.68521911462 |
| NM_153485    | NUP155 | 3350 | 3469 | 10.907611536  |
| NM_153485    | NUP155 | 3544 | 3714 | 10.2701816153 |
| NM_153485    | NUP155 | 4307 | 4430 | 7.1002566139  |
| NM_153485    | NUP155 | 3764 | 3905 | 11.1877194552 |
| NM_153485    | NUP155 | 2335 | 2392 | 7.01611740452 |
| NM_153485    | NUP155 | 1016 | 1173 | 10.800696332  |
| NM_153485    | NUP155 | 487  | 756  | 11.800696332  |
| NM_153485    | NUP155 | 2487 | 2678 | 11.0071472095 |
| NM_153485    | NUP155 | 1728 | 1980 | 10.4221847088 |
| NM_153485    | NUP155 | 2864 | 2967 | 9.68521911462 |
| NM_153485    | NUP155 | 95   | 178  | 9.1002566139  |
| NM_153485    | NUP155 | 1602 | 1722 | 9.42218470879 |
| NM_153485    | NUP155 | 2089 | 2237 | 10.6852191146 |
| NM_153485    | NUP155 | 308  | 486  | 10.4221847088 |
| NM_153485    | NUP155 | 179  | 308  | 9.68521911462 |
| NM_153485    | NUP155 | 4241 | 4297 | 8.10024988285 |
| NM_001174108 | ZBED6  | 589  | 664  | 9.93241261134 |
| NM_001174108 | ZBED6  | 1338 | 1394 | 10.1954470172 |
| NM_001174108 | ZBED6  | 1429 | 1524 | 10.7804095179 |
| NM_001174108 | ZBED6  | 754  | 834  | 7.61048451645 |
| NM_001174108 | ZBED6  | 902  | 1048 | 9.93241261134 |
| NM_001174108 | ZBED6  | 1061 | 1124 | 8.60646691628 |
| NM_001174108 | ZBED6  | 53   | 108  | 8.61048451645 |
| NM_001174108 | ZBED6  | 1140 | 1223 | 8.61048451623 |
| NM_001174108 | ZBED6  | 235  | 402  | 9.61048451645 |
| NM_001174108 | ZBED6  | 2770 | 2908 | 10.1954470172 |
| NM_001174108 | ZBED6  | 1530 | 1708 | 10.1954470172 |
| NM_001174108 | ZBED6  | 1748 | 1952 | 10.1954470172 |
| NM_001174108 | ZBED6  | 2419 | 2565 | 10.7804095179 |
| NM_001174108 | ZBED6  | 2136 | 2253 | 9.61048451645 |
| NM_001174100 | PCBP4  | 1099 | 1137 | 8.00868453382 |
| NM_001174100 | PCBP4  | 906  | 980  | 8.42372204065 |



|              |        |      |      |               |
|--------------|--------|------|------|---------------|
| NM_001001925 | MTUS1  | 4696 | 4745 | 6.08791493329 |
| NM_001001925 | MTUS1  | 901  | 943  | 6.67689479827 |
| NM_001001925 | MTUS1  | 589  | 675  | 6.09193252592 |
| NM_001001925 | MTUS1  | 5822 | 5907 | 7.09193229755 |
| NM_001001925 | MTUS1  | 2671 | 2732 | 5.09175878315 |
| NM_001001925 | MTUS1  | 6116 | 6200 | 5.09193252592 |
| NM_001174105 | CD14   | 367  | 440  | 11.4315190063 |
| NM_001174105 | CD14   | 857  | 928  | 12.4315190063 |
| NM_001174105 | CD14   | 620  | 685  | 11.4315190061 |
| NM_001174105 | CD14   | 1105 | 1180 | 11.4315122753 |
| NM_001174105 | CD14   | 219  | 281  | 12.0164815071 |
| NM_001174105 | CD14   | 1413 | 1500 | 10.4275014062 |
| NM_000308    | CTSA   | 2110 | 2243 | 6.65427512074 |
| NM_000308    | CTSA   | 1941 | 2016 | 6.33234702586 |
| NM_000308    | CTSA   | 2031 | 2106 | 5.33234702586 |
| NM_000308    | CTSA   | 423  | 1940 | 11.6898990305 |
| NM_201524    | GPR56  | 2947 | 3029 | 10.410690516  |
| NM_201524    | GPR56  | 1728 | 1790 | 12.410690516  |
| NM_201524    | GPR56  | 2267 | 2297 | 10.4106902801 |
| NM_201524    | GPR56  | 2571 | 2659 | 13.410690516  |
| NM_201524    | GPR56  | 2216 | 2265 | 10.4106837849 |
| NM_201524    | GPR56  | 1640 | 1707 | 10.4106837849 |
| NM_201524    | GPR56  | 3181 | 3274 | 11.410690516  |
| NM_201524    | GPR56  | 1208 | 1273 | 10.4106837849 |
| NM_201524    | GPR56  | 2529 | 2563 | 10.3265513066 |
| NM_201524    | GPR56  | 3516 | 3567 | 10.4066729158 |
| NM_201524    | GPR56  | 3969 | 4016 | 11.3265513066 |
| NM_201524    | GPR56  | 869  | 924  | 11.4106905084 |
| NM_201524    | GPR56  | 692  | 792  | 12.9956530167 |
| NM_201524    | GPR56  | 1518 | 1586 | 12.410690516  |
| NM_201524    | GPR56  | 1333 | 1406 | 11.4105167657 |
| NM_201524    | GPR56  | 1844 | 2091 | 14.218045438  |
| NM_201524    | GPR56  | 2298 | 2443 | 13.410690516  |
| NM_201524    | GPR56  | 2670 | 2753 | 11.4106905084 |
| NM_201524    | GPR56  | 956  | 1182 | 13.218045438  |
| NM_201524    | GPR56  | 3669 | 3789 | 11.9956530167 |
| NM_181465    | MRPL55 | 152  | 215  | 5.0490292254  |
| NM_181465    | MRPL55 | 333  | 373  | 5.04518537554 |
| NM_181465    | MRPL55 | 418  | 502  | 6.04920297572 |
| NM_000302    | PL0D1  | 833  | 941  | 6.31141460375 |
| NM_000302    | PL0D1  | 534  | 592  | 4.14148959476 |
| NM_000302    | PL0D1  | 2186 | 2261 | 4.72645210303 |
| NM_000302    | PL0D1  | 2273 | 2364 | 5.46341769719 |
| NM_000302    | PL0D1  | 1244 | 1319 | 5.14148960231 |
| NM_000302    | PL0D1  | 1793 | 1860 | 4.72645210303 |
| NM_000302    | PL0D1  | 415  | 468  | 3.13747200213 |
| NM_000302    | PL0D1  | 1393 | 1462 | 6.14148960231 |
| NM_000302    | PL0D1  | 197  | 395  | 6.14148960231 |
| NM_000302    | PL0D1  | 2746 | 2863 | 3.14148959476 |
| NM_000302    | PL0D1  | 608  | 826  | 6.46341769719 |

|              |        |       |       |               |
|--------------|--------|-------|-------|---------------|
| NM_000302    | PLOD1  | 2612  | 2683  | 4.14148960208 |
| NM_000302    | PLOD1  | 1010  | 1094  | 4.7264521028  |
| NM_000302    | PLOD1  | 1466  | 1565  | 3.14148960231 |
| NM_000302    | PLOD1  | 1863  | 2018  | 5.94884452436 |
| NM_000302    | PLOD1  | 2441  | 2600  | 6.31141460375 |
| NM_181466    | EIF6   | 911   | 1062  | 6.25072057733 |
| NM_181466    | EIF6   | 583   | 676   | 6.7361474045  |
| NM_181466    | EIF6   | 74    | 198   | 7.25072057733 |
| NM_181466    | EIF6   | 317   | 582   | 7.62923220058 |
| NM_181466    | EIF6   | 744   | 903   | 7.38822410108 |
| NM_001164273 | MGA    | 5829  | 5911  | 6.41424019035 |
| NM_001164273 | MGA    | 4998  | 5054  | 8.73616829279 |
| NM_001164273 | MGA    | 10650 | 10691 | 6.41423346685 |
| NM_001164273 | MGA    | 2292  | 2341  | 7.41423996198 |
| NM_001164273 | MGA    | 5308  | 5369  | 6.4142401979  |
| NM_001164273 | MGA    | 2355  | 2405  | 6.41022259773 |
| NM_001164273 | MGA    | 10996 | 11053 | 6.41423996198 |
| NM_001164273 | MGA    | 4391  | 4439  | 6.41022259773 |
| NM_001164273 | MGA    | 1325  | 1400  | 6.41022259773 |
| NM_001164273 | MGA    | 2809  | 2867  | 6.41406644758 |
| NM_001164273 | MGA    | 3978  | 4045  | 7.99920269862 |
| NM_001164273 | MGA    | 1879  | 1954  | 7.41423346685 |
| NM_001164273 | MGA    | 2037  | 2084  | 6.33010098852 |
| NM_001164273 | MGA    | 9746  | 9788  | 7.41406644758 |
| NM_001164273 | MGA    | 6807  | 6867  | 7.91506348924 |
| NM_001164273 | MGA    | 5205  | 5267  | 6.33010098852 |
| NM_001164273 | MGA    | 1571  | 1665  | 7.99919596757 |
| NM_001164273 | MGA    | 3783  | 3843  | 7.41406644758 |
| NM_001164273 | MGA    | 8213  | 8254  | 6.33010098852 |
| NM_001164273 | MGA    | 416   | 465   | 7.91506348924 |
| NM_001164273 | MGA    | 7076  | 7262  | 9.4142401979  |
| NM_001164273 | MGA    | 10398 | 10446 | 6.41406644758 |
| NM_001164273 | MGA    | 9454  | 9515  | 7.33010098852 |
| NM_001164273 | MGA    | 2980  | 3057  | 7.9992026984  |
| NM_001164273 | MGA    | 4675  | 4752  | 6.41406644758 |
| NM_001164273 | MGA    | 2627  | 2710  | 7.99919596757 |
| NM_001164273 | MGA    | 5711  | 5813  | 7.4142401979  |
| NM_001102426 | TBC1D8 | 2439  | 2518  | 4.78052350997 |
| NM_001102426 | TBC1D8 | 2761  | 2814  | 5.78053023348 |
| NM_001102426 | TBC1D8 | 3033  | 3098  | 4.78053024103 |
| NM_001102426 | TBC1D8 | 3919  | 3984  | 4.77651264086 |
| NM_001102426 | TBC1D8 | 3473  | 3561  | 4.78053024103 |
| NM_001102426 | TBC1D8 | 2035  | 2207  | 6.78053024103 |
| NM_003309    | TSPYL1 | 2868  | 2939  | 5.25958097673 |
| NM_003309    | TSPYL1 | 1282  | 1346  | 7.25958098428 |
| NM_003309    | TSPYL1 | 1189  | 1232  | 6.844543485   |
| NM_003309    | TSPYL1 | 1615  | 1682  | 5.25958098427 |
| NM_003309    | TSPYL1 | 1685  | 1780  | 8.42950598572 |
| NM_003309    | TSPYL1 | 3267  | 3336  | 5.25958098406 |
| NM_003309    | TSPYL1 | 1373  | 1426  | 5.25957425323 |

|              |         |      |      |               |
|--------------|---------|------|------|---------------|
| NM_003309    | TSPYL1  | 1849 | 1896 | 5.25958097673 |
| NM_003309    | TSPYL1  | 2727 | 2764 | 5.25957425323 |
| NM_003309    | TSPYL1  | 1917 | 1996 | 7.25958098428 |
| NM_003309    | TSPYL1  | 2001 | 2067 | 6.84454348478 |
| NM_003309    | TSPYL1  | 2069 | 2122 | 7.844543485   |
| NM_003309    | TSPYL1  | 1429 | 1572 | 7.58150907917 |
| NM_003309    | TSPYL1  | 2978 | 3055 | 6.844543485   |
| NM_003309    | TSPYL1  | 236  | 400  | 8.06693590634 |
| NM_003309    | TSPYL1  | 2362 | 2420 | 5.25940723396 |
| NM_003309    | TSPYL1  | 960  | 1130 | 7.58150907917 |
| NM_175921    | C5orf51 | 2777 | 2834 | 7.51329150595 |
| NM_175921    | C5orf51 | 3270 | 3347 | 6.51345852522 |
| NM_175921    | C5orf51 | 2852 | 2911 | 8.09441015682 |
| NM_175921    | C5orf51 | 4509 | 4663 | 9.09842775699 |
| NM_175921    | C5orf51 | 1716 | 1806 | 7.51346502035 |
| NM_003304    | TRPC1   | 2152 | 2243 | 6.83692809155 |
| NM_003304    | TRPC1   | 343  | 405  | 8.83291722243 |
| NM_003304    | TRPC1   | 559  | 627  | 6.83693458669 |
| NM_003304    | TRPC1   | 1308 | 1370 | 7.83676107229 |
| NM_003304    | TRPC1   | 1981 | 2053 | 6.83291722243 |
| NM_006221    | PIN1    | 992  | 1037 | 5.41082448654 |
| NM_006221    | PIN1    | 415  | 493  | 6.99578722318 |
| NM_001002001 | GMPR2   | 906  | 982  | 3.35977979497 |
| NM_001002001 | GMPR2   | 1512 | 1612 | 4.94474229569 |
| NM_001002001 | GMPR2   | 203  | 273  | 3.35960604465 |
| NM_001002001 | GMPR2   | 658  | 756  | 5.94474229569 |
| NM_001002001 | GMPR2   | 525  | 653  | 5.68170788986 |
| NM_004849    | ATG5    | 1389 | 1445 | 4.4839998862  |
| NM_004849    | ATG5    | 413  | 458  | 3.48400638134 |
| NM_004849    | ATG5    | 907  | 999  | 5.80593471214 |
| NM_004849    | ATG5    | 302  | 409  | 5.48400661726 |
| NM_005662    | VDAC3   | 1406 | 1452 | 5.02224492768 |
| NM_005662    | VDAC3   | 178  | 286  | 6.02626252785 |
| NM_005662    | VDAC3   | 562  | 653  | 6.61122502857 |
| NM_005662    | VDAC3   | 693  | 825  | 7.34819062274 |
| NM_005662    | VDAC3   | 1023 | 1213 | 7.02626252785 |
| NM_005662    | VDAC3   | 387  | 525  | 8.02626252785 |
| NM_005662    | VDAC3   | 835  | 944  | 6.0262557968  |
| NM_001042535 | AGAP3   | 648  | 694  | 6.19438931352 |
| NM_001042535 | AGAP3   | 522  | 590  | 7.19823316338 |
| NM_001042535 | AGAP3   | 763  | 859  | 7.19840691369 |
| NM_001042535 | AGAP3   | 1114 | 1183 | 7.19438931352 |
| NM_004843    | IL27RA  | 1277 | 1335 | 9.24507154144 |
| NM_004843    | IL27RA  | 246  | 325  | 10.8300340422 |
| NM_004843    | IL27RA  | 1063 | 1114 | 9.24105394882 |
| NM_004843    | IL27RA  | 506  | 562  | 9.24105394882 |
| NM_004843    | IL27RA  | 930  | 977  | 9.1609323396  |
| NM_004843    | IL27RA  | 833  | 876  | 9.24105394882 |
| NM_004515    | ILF2    | 1496 | 1606 | 6.97117843603 |
| NM_004515    | ILF2    | 1238 | 1295 | 5.55596718643 |

|              |        |      |      |               |
|--------------|--------|------|------|---------------|
| NM_004515    | ILF2   | 115  | 159  | 5.5561409292  |
| NM_004515    | ILF2   | 966  | 1090 | 7.43061005467 |
| NM_004515    | ILF2   | 1664 | 1730 | 5.55614093674 |
| NM_004515    | ILF2   | 895  | 955  | 6.77853335809 |
| NM_004515    | ILF2   | 1109 | 1170 | 6.29310653092 |
| NM_004515    | ILF2   | 1297 | 1422 | 5.55614093675 |
| NM_004515    | ILF2   | 201  | 893  | 10.3634958588 |
| NM_004514    | FOXK2  | 3313 | 3376 | 5.59416473468 |
| NM_004514    | FOXK2  | 2236 | 2273 | 6.25924884461 |
| NM_004514    | FOXK2  | 1034 | 1130 | 6.67830394407 |
| NM_004514    | FOXK2  | 500  | 551  | 5.67813019375 |
| NM_004514    | FOXK2  | 2901 | 3046 | 4.67830394407 |
| NM_004514    | FOXK2  | 2128 | 2220 | 6.26326644479 |
| NM_004514    | FOXK2  | 1947 | 2015 | 6.26326643724 |
| NM_004517    | ILK    | 428  | 479  | 4.36814478975 |
| NM_004517    | ILK    | 1460 | 1527 | 5.95328104079 |
| NM_004517    | ILK    | 523  | 593  | 5.36831853985 |
| NM_004517    | ILK    | 975  | 1304 | 7.36831854007 |
| NM_004517    | ILK    | 837  | 923  | 6.36831180902 |
| NM_004517    | ILK    | 204  | 281  | 4.36831180902 |
| NM_004517    | ILK    | 669  | 795  | 6.36831854007 |
| NM_181443    | BTBD3  | 2849 | 2900 | 5.82936624671 |
| NM_181443    | BTBD3  | 1018 | 1079 | 6.82919922745 |
| NM_181443    | BTBD3  | 793  | 845  | 5.82919922745 |
| NM_181443    | BTBD3  | 570  | 759  | 9.5298126959  |
| NM_005160    | ADRBK2 | 3267 | 3321 | 6.32531737664 |
| NM_005160    | ADRBK2 | 2385 | 2470 | 6.9102866082  |
| NM_144693    | ZNF558 | 1606 | 1689 | 8.43194252162 |
| NM_032954    | MLXIPL | 3125 | 3196 | 6.52433932246 |
| NM_032954    | MLXIPL | 774  | 843  | 7.10930182296 |
| NM_032954    | MLXIPL | 2712 | 2830 | 7.52433932246 |
| NM_032954    | MLXIPL | 2395 | 2510 | 5.52433932246 |
| NM_032954    | MLXIPL | 2903 | 2997 | 5.52433932223 |
| NM_000169    | GLA    | 177  | 298  | 9.58618393484 |
| NM_000169    | GLA    | 103  | 168  | 7.8857442167  |
| NM_000169    | GLA    | 308  | 422  | 9.58618393484 |
| NM_000169    | GLA    | 1281 | 1360 | 7.47070671742 |
| NM_000169    | GLA    | 449  | 1280 | 12.6272112031 |
| NM_001102420 | ZFAND5 | 1189 | 1256 | 5.32675059188 |
| NM_001102420 | ZFAND5 | 2256 | 2304 | 3.65764888178 |
| NM_001102420 | ZFAND5 | 2361 | 2433 | 4.74178809116 |
| NM_001102420 | ZFAND5 | 956  | 1011 | 3.74178785524 |
| NM_001102420 | ZFAND5 | 1715 | 1787 | 2.73777049099 |
| NM_001102420 | ZFAND5 | 2698 | 2744 | 2.74178809116 |
| NM_001102420 | ZFAND5 | 325  | 384  | 2.74161434084 |
| NM_001102420 | ZFAND5 | 1609 | 1685 | 2.74161434084 |
| NM_001102420 | ZFAND5 | 744  | 812  | 3.74178808361 |
| NM_001102420 | ZFAND5 | 1985 | 2068 | 3.74178808361 |
| NM_000161    | GCH1   | 1866 | 1953 | 6.07022847163 |
| NM_000161    | GCH1   | 962  | 1038 | 6.06621087901 |

|           |        |      |      |               |
|-----------|--------|------|------|---------------|
| NM_000161 | GCH1   | 2024 | 2116 | 6.07022847163 |
| NM_005513 | GTF2E1 | 1834 | 1871 | 7.00665233675 |
| NM_000367 | TPMT   | 137  | 182  | 5.80953361489 |
| NM_000367 | TPMT   | 1274 | 1317 | 5.22457111417 |
| NM_000367 | TPMT   | 184  | 259  | 4.3087035925  |
| NM_020300 | MGST1  | 38   | 141  | 6.38018857445 |
| NM_020300 | MGST1  | 149  | 913  | 9.81557471912 |
| NM_020307 | CCNL1  | 810  | 869  | 3.30120899765 |
| NM_020307 | CCNL1  | 953  | 1006 | 4.70726957087 |
| NM_020307 | CCNL1  | 1216 | 1264 | 2.30120899765 |
| NM_020307 | CCNL1  | 2416 | 2516 | 4.70727630192 |
| NM_020307 | CCNL1  | 1266 | 1345 | 3.38534797112 |
| NM_020307 | CCNL1  | 701  | 747  | 2.30120899765 |
| NM_020307 | CCNL1  | 2222 | 2349 | 4.38534820703 |
| NM_006802 | SF3A3  | 428  | 495  | 4.82167884234 |
| NM_006802 | SF3A3  | 1478 | 1547 | 3.82167884967 |
| NM_006802 | SF3A3  | 541  | 655  | 5.62903377195 |
| NM_006802 | SF3A3  | 1298 | 1376 | 4.4066413506  |
| NM_006802 | SF3A3  | 747  | 812  | 3.82167884234 |
| NM_006802 | SF3A3  | 846  | 939  | 5.40664135061 |
| NM_006802 | SF3A3  | 259  | 393  | 4.82167884989 |
| NM_002317 | LOX    | 3622 | 3685 | 4.94468960134 |
| NM_002317 | LOX    | 1118 | 1174 | 7.26661769623 |
| NM_002317 | LOX    | 3260 | 3368 | 7.52965210206 |
| NM_002317 | LOX    | 1660 | 1739 | 6.52964537101 |
| NM_002317 | LOX    | 1176 | 1235 | 5.94468960112 |
| NM_002317 | LOX    | 1741 | 1807 | 6.94468959379 |
| NM_002317 | LOX    | 1954 | 2027 | 5.94468287028 |
| NM_002317 | LOX    | 635  | 668  | 4.94067200116 |
| NM_002317 | LOX    | 861  | 953  | 6.94468960134 |
| NM_002317 | LOX    | 3965 | 4116 | 6.52965210206 |
| NM_002317 | LOX    | 488  | 539  | 4.94468287028 |
| NM_002317 | LOX    | 700  | 781  | 4.94468960134 |
| NM_002317 | LOX    | 1015 | 1115 | 5.94468960134 |
| NM_002317 | LOX    | 1257 | 1580 | 9.64512931948 |
| NM_002317 | LOX    | 224  | 448  | 7.94468960134 |
| NM_002317 | LOX    | 89   | 219  | 6.52965210206 |
| NM_006200 | PCSK5  | 1211 | 1309 | 14.5210887411 |
| NM_006200 | PCSK5  | 3286 | 3321 | 12.1991539151 |
| NM_006200 | PCSK5  | 3204 | 3263 | 11.195143046  |
| NM_006200 | PCSK5  | 1328 | 1405 | 13.1991606462 |
| NM_006200 | PCSK5  | 656  | 804  | 14.1991606462 |
| NM_006200 | PCSK5  | 1515 | 1624 | 12.1991606462 |
| NM_006200 | PCSK5  | 1739 | 1917 | 15.1060512418 |
| NM_006200 | PCSK5  | 3041 | 3190 | 14.3690856476 |
| NM_006200 | PCSK5  | 1635 | 1726 | 12.1991606462 |
| NM_006200 | PCSK5  | 2817 | 2895 | 13.5210887411 |
| NM_006200 | PCSK5  | 3427 | 3477 | 11.1150214368 |
| NM_006200 | PCSK5  | 959  | 1207 | 15.6585922648 |
| NM_006200 | PCSK5  | 1409 | 1509 | 13.5210887411 |

|              |        |       |       |                  |
|--------------|--------|-------|-------|------------------|
| NM_006200    | PCSK5  | 822   | 907   | 12.7841231469    |
| NM_006200    | PCSK5  | 2660  | 2809  | 13.7841231469    |
| NM_006200    | PCSK5  | 2356  | 2572  | 15.2866234874    |
| NM_006200    | PCSK5  | 2906  | 3021  | 14.0065155682    |
| NM_006200    | PCSK5  | 2002  | 2054  | 12.1991539151    |
| NM_006200    | PCSK5  | 3874  | 3936  | 12.195143046     |
| NM_006200    | PCSK5  | 1935  | 2001  | 11.1991606459    |
| NM_006200    | PCSK5  | 2077  | 2345  | 15.7227226022    |
| NM_006200    | PCSK5  | 4532  | 4634  | 11.1991606462    |
| NM_022551    | RPS18  | 479   | 534   | -0.0356241301323 |
| NM_022551    | RPS18  | 14    | 464   | 3.37941336915    |
| NM_001023587 | ABCC5  | 250   | 316   | 7.34622684825    |
| NM_001023587 | ABCC5  | 637   | 692   | 8.34220925563    |
| NM_001023587 | ABCC5  | 79    | 192   | 9.3462268558     |
| NM_001023587 | ABCC5  | 390   | 635   | 11.433689697     |
| NM_003776    | MRPL40 | 140   | 178   | 6.43460632899    |
| NM_013257    | SGK3   | 180   | 232   | 7.5971308739     |
| NM_013254    | TBK1   | 1213  | 1281  | 5.91588758972    |
| NM_013254    | TBK1   | 151   | 214   | 7.50084986208    |
| NM_013255    | MKLN1  | 656   | 768   | 8.18056704594    |
| NM_013255    | MKLN1  | 3870  | 3906  | 6.17654944576    |
| NM_013255    | MKLN1  | 1990  | 2075  | 8.18056704594    |
| NM_013255    | MKLN1  | 9270  | 9341  | 7.76552954666    |
| NM_013255    | MKLN1  | 3151  | 3206  | 7.68139033727    |
| NM_013255    | MKLN1  | 313   | 380   | 7.18056704594    |
| NM_013255    | MKLN1  | 7641  | 7699  | 6.18056704594    |
| NM_013255    | MKLN1  | 10780 | 10848 | 7.18056704593    |
| NM_013255    | MKLN1  | 2810  | 2859  | 8.5024949049     |
| NM_013255    | MKLN1  | 6393  | 6487  | 8.50249514082    |
| NM_013255    | MKLN1  | 1490  | 1653  | 10.3504920474    |
| NM_013255    | MKLN1  | 2295  | 2405  | 8.50249514082    |
| NM_013255    | MKLN1  | 6792  | 6871  | 7.76552954665    |
| NM_013255    | MKLN1  | 10880 | 11032 | 8.50249514082    |
| NM_013255    | MKLN1  | 410   | 583   | 9.35049204738    |
| NM_013255    | MKLN1  | 9852  | 9931  | 8.50249514082    |
| NM_013255    | MKLN1  | 1349  | 1446  | 8.76552954666    |
| NM_013255    | MKLN1  | 898   | 1327  | 11.0385480411    |
| NM_013255    | MKLN1  | 6585  | 6643  | 7.76552953911    |
| NM_013255    | MKLN1  | 149   | 306   | 8.18056704594    |
| NM_013255    | MKLN1  | 6660  | 6716  | 7.09642783655    |
| NM_013255    | MKLN1  | 2102  | 2284  | 8.98792196799    |
| NM_013255    | MKLN1  | 1863  | 1989  | 8.50249514082    |
| NM_006305    | ANP32A | 879   | 926   | 1.83884567089    |
| NM_006305    | ANP32A | 1915  | 2030  | 3.83885240172    |
| NM_006305    | ANP32A | 933   | 992   | 3.83885240194    |
| NM_006305    | ANP32A | 1870  | 1913  | 2.83483480177    |
| NM_006305    | ANP32A | 1274  | 1315  | 1.83483480177    |
| NM_006305    | ANP32A | 588   | 634   | 1.83483480177    |
| NM_006305    | ANP32A | 1110  | 1189  | 4.16078049661    |
| NM_006305    | ANP32A | 1670  | 1814  | 5.00877740339    |

|           |        |      |      |               |
|-----------|--------|------|------|---------------|
| NM_006305 | ANP32A | 54   | 347  | 5.29828402058 |
| NM_024501 | HOXD1  | 263  | 283  | 9.04202836443 |
| NM_002210 | ITGAV  | 4525 | 4603 | 6.52268839053 |
| NM_002210 | ITGAV  | 5228 | 5295 | 5.52268815461 |
| NM_002210 | ITGAV  | 5889 | 5963 | 7.69261339197 |
| NM_002210 | ITGAV  | 4014 | 4062 | 6.10765089125 |
| NM_002210 | ITGAV  | 6782 | 6847 | 4.52251464021 |
| NM_002210 | ITGAV  | 6718 | 6766 | 5.52268839053 |
| NM_002210 | ITGAV  | 5138 | 5190 | 4.52268838298 |
| NM_002210 | ITGAV  | 4142 | 4212 | 6.10765065533 |
| NM_002210 | ITGAV  | 5739 | 5796 | 4.51867079036 |
| NM_002210 | ITGAV  | 6441 | 6506 | 7.10765089125 |
| NM_002210 | ITGAV  | 5799 | 5839 | 4.43854918115 |
| NM_002210 | ITGAV  | 26   | 83   | 4.52268839053 |
| NM_002210 | ITGAV  | 5336 | 5386 | 4.52268165948 |
| NM_002210 | ITGAV  | 4708 | 4809 | 7.33004331259 |
| NM_002210 | ITGAV  | 3434 | 3489 | 5.52268838298 |
| NM_002210 | ITGAV  | 6306 | 6439 | 6.10765089125 |
| NM_002210 | ITGAV  | 3881 | 3973 | 7.33004331259 |
| NM_002210 | ITGAV  | 3499 | 3545 | 5.52268839052 |
| NM_002210 | ITGAV  | 1466 | 1574 | 7.52268839053 |
| NM_002210 | ITGAV  | 2755 | 2943 | 8.91500581331 |
| NM_002210 | ITGAV  | 2356 | 2535 | 8.91500581331 |
| NM_002210 | ITGAV  | 2537 | 2740 | 9.33004331259 |
| NM_002210 | ITGAV  | 6522 | 6599 | 4.52268839053 |
| NM_002210 | ITGAV  | 4392 | 4500 | 7.10765089125 |
| NM_002210 | ITGAV  | 4980 | 5137 | 6.84461648542 |
| NM_002210 | ITGAV  | 2943 | 3228 | 9.77061590397 |
| NM_002210 | ITGAV  | 3246 | 3433 | 8.84461648542 |
| NM_002210 | ITGAV  | 85   | 167  | 6.1076441602  |
| NM_002210 | ITGAV  | 4244 | 4390 | 7.52268839053 |
| NM_002210 | ITGAV  | 3595 | 3813 | 8.33004331259 |
| NM_002210 | ITGAV  | 428  | 627  | 7.98212000917 |
| NM_002210 | ITGAV  | 1597 | 2356 | 11.3555784047 |
| NM_002210 | ITGAV  | 628  | 1440 | 11.4295789861 |
| NM_002210 | ITGAV  | 6161 | 6300 | 5.52268839053 |
| NM_002210 | ITGAV  | 268  | 424  | 8.42957898614 |
| NM_002211 | ITGB1  | 304  | 364  | 4.09179785932 |
| NM_002211 | ITGB1  | 1337 | 1495 | 5.82876345349 |
| NM_002211 | ITGB1  | 3045 | 3247 | 6.67676036004 |
| NM_002211 | ITGB1  | 3289 | 3352 | 2.5068353586  |
| NM_002211 | ITGB1  | 135  | 303  | 6.67676036004 |
| NM_002211 | ITGB1  | 3375 | 3693 | 7.99868845493 |
| NM_002211 | ITGB1  | 375  | 602  | 6.5068353586  |
| NM_002211 | ITGB1  | 3770 | 3871 | 3.5068353586  |
| NM_002211 | ITGB1  | 608  | 1329 | 9.36481635373 |
| NM_002211 | ITGB1  | 2760 | 2992 | 7.67676036004 |
| NM_002211 | ITGB1  | 1504 | 2703 | 10.2279345473 |
| NM_022553 | VPS52  | 468  | 561  | 6.93681838948 |
| NM_022553 | VPS52  | 2700 | 2761 | 6.35184939362 |

|              |        |      |      |                 |
|--------------|--------|------|------|-----------------|
| NM_022553    | VPS52  | 1132 | 1180 | 5.35185611713   |
| NM_022553    | VPS52  | 2608 | 2694 | 5.35168237436   |
| NM_022553    | VPS52  | 1863 | 1906 | 6.26771691529   |
| NM_022553    | VPS52  | 2065 | 2190 | 6.9368186254    |
| NM_022553    | VPS52  | 2472 | 2519 | 6.35185612467   |
| NM_022553    | VPS52  | 397  | 450  | 5.35185611713   |
| NM_022553    | VPS52  | 2202 | 2293 | 7.67378421956   |
| NM_022553    | VPS52  | 1446 | 1532 | 7.67378421202   |
| NM_022553    | VPS52  | 1550 | 1704 | 6.9368186254    |
| NM_022553    | VPS52  | 2859 | 2990 | 6.35185612468   |
| NM_022553    | VPS52  | 157  | 302  | 7.35185612468   |
| NM_002213    | ITGB5  | 2970 | 3035 | 7.83429728741   |
| NM_002213    | ITGB5  | 1669 | 1716 | 6.83429728741   |
| NM_002213    | ITGB5  | 1783 | 1843 | 6.24933478669   |
| NM_002213    | ITGB5  | 3045 | 3087 | 6.24933477914   |
| NM_002213    | ITGB5  | 1072 | 1119 | 6.24933455077   |
| NM_002213    | ITGB5  | 578  | 675  | 7.57126288158   |
| NM_002213    | ITGB5  | 2031 | 2071 | 5.24933478668   |
| NM_002213    | ITGB5  | 1892 | 2006 | 7.83429728741   |
| NM_002213    | ITGB5  | 1724 | 1782 | 6.83429728719   |
| NM_002213    | ITGB5  | 2195 | 2453 | 9.57126288158   |
| NM_002213    | ITGB5  | 2616 | 2772 | 8.24933478669   |
| NM_002213    | ITGB5  | 924  | 1063 | 8.57126288158   |
| NM_002213    | ITGB5  | 315  | 542  | 9.05668970875   |
| NM_002213    | ITGB5  | 2458 | 2578 | 7.83429728741   |
| NM_002213    | ITGB5  | 3129 | 3351 | 9.33679762794   |
| NM_002213    | ITGB5  | 694  | 893  | 9.41925978813   |
| NM_002213    | ITGB5  | 1233 | 1662 | 9.89319097647   |
| NM_002216    | ITIH2  | 3031 | 3108 | 3.0666429826    |
| NM_002216    | ITIH2  | 20   | 108  | 2.71871967918   |
| NM_002216    | ITIH2  | 3146 | 3183 | -0.744729539633 |
| NM_002216    | ITIH2  | 1317 | 1488 | 3.71871967918   |
| NM_002216    | ITIH2  | 859  | 1284 | 5.21348437093   |
| NM_002216    | ITIH2  | 146  | 856  | 6.00075504694   |
| NM_002216    | ITIH2  | 1492 | 2268 | 6.02747238532   |
| NM_002216    | ITIH2  | 2280 | 3019 | 5.76708270074   |
| NM_001166102 | NDUFV1 | 588  | 625  | 4.58370876496   |
| NM_001166102 | NDUFV1 | 650  | 776  | 6.90563709577   |
| NM_001166102 | NDUFV1 | 1060 | 1176 | 7.1686715016    |
| NM_001166102 | NDUFV1 | 214  | 365  | 7.39106392294   |
| NM_001166102 | NDUFV1 | 1375 | 1497 | 7.75363400232   |
| NM_001166102 | NDUFV1 | 1176 | 1276 | 6.58370900088   |
| NM_001166102 | NDUFV1 | 902  | 1044 | 8.04314061952   |
| NM_001166102 | NDUFV1 | 365  | 479  | 6.1686715016    |
| NM_031370    | HNRNPD | 1617 | 1684 | 4.17078865476   |
| NM_031370    | HNRNPD | 1182 | 1235 | 3.58582591812   |
| NM_031370    | HNRNPD | 908  | 1053 | 4.58582615404   |
| NM_031370    | HNRNPD | 1089 | 1166 | 1.58582615403   |
| NM_031370    | HNRNPD | 1259 | 1367 | 3.17078865476   |
| NM_031370    | HNRNPD | 564  | 819  | 5.49271674965   |



|              |        |      |      |                |
|--------------|--------|------|------|----------------|
| NM_031370    | HNRNPD | 1490 | 1616 | 5.17078865476  |
| NM_031372    | HNRPDL | 877  | 937  | 0.958895745909 |
| NM_031372    | HNRPDL | 3180 | 3224 | 1.95888901486  |
| NM_031372    | HNRPDL | 1836 | 1917 | 3.54385824663  |
| NM_031372    | HNRPDL | 1577 | 1626 | 0.95889550999  |
| NM_031372    | HNRPDL | 1496 | 1576 | 0.95889573836  |
| NM_031372    | HNRPDL | 1787 | 1821 | 0.95889550999  |
| NM_031372    | HNRPDL | 1925 | 2034 | 3.95889574591  |
| NM_031372    | HNRPDL | 1391 | 1458 | 2.54385801071  |
| NM_031372    | HNRPDL | 938  | 1197 | 5.12882074735  |
| NM_031372    | HNRPDL | 1236 | 1350 | 4.65933546405  |
| NM_031372    | HNRPDL | 1640 | 1766 | 3.76625066797  |
| NM_031372    | HNRPDL | 2237 | 2353 | 1.95889574591  |
| NM_001166109 | PALLD  | 2837 | 2877 | 10.8962550615  |
| NM_001166109 | PALLD  | 2096 | 2164 | 10.8962552972  |
| NM_001166109 | PALLD  | 1491 | 1549 | 11.8922376973  |
| NM_001166109 | PALLD  | 1353 | 1399 | 10.8922376973  |
| NM_001166109 | PALLD  | 2320 | 2373 | 10.8922376973  |
| NM_001166109 | PALLD  | 4638 | 4726 | 11.8962552974  |
| NM_001166109 | PALLD  | 1673 | 1746 | 9.89223769725  |
| NM_001166109 | PALLD  | 3928 | 3978 | 9.89223769725  |
| NM_001166109 | PALLD  | 2717 | 2800 | 10.8962485664  |
| NM_001136035 | TRMT1  | 1620 | 1675 | 6.47372246618  |
| NM_001136035 | TRMT1  | 1518 | 1616 | 6.47372919724  |
| NM_001136035 | TRMT1  | 360  | 402  | 5.47372918969  |
| NM_001136035 | TRMT1  | 1421 | 1498 | 5.47372919724  |
| NM_001136035 | TRMT1  | 633  | 750  | 8.05869169796  |
| NM_001136035 | TRMT1  | 62   | 159  | 7.47372919724  |
| NM_001136035 | TRMT1  | 459  | 537  | 5.47355544692  |
| NM_001190987 | SRSF11 | 1475 | 1540 | 2.92351405377  |
| NM_001190987 | SRSF11 | 93   | 164  | 3.50847655449  |
| NM_001190987 | SRSF11 | 2049 | 2125 | 2.92351405377  |
| NM_001190987 | SRSF11 | 2612 | 2667 | 1.92334030345  |
| NM_001190987 | SRSF11 | 1926 | 1991 | 1.92351404622  |
| NM_001190987 | SRSF11 | 2533 | 2585 | 2.92334030345  |
| NM_001190987 | SRSF11 | 1544 | 1731 | 5.24544214866  |
| NM_001190987 | SRSF11 | 2127 | 2212 | 4.24544214866  |
| NM_001190987 | SRSF11 | 232  | 805  | 6.7814950489   |
| NM_001190987 | SRSF11 | 871  | 950  | 1.92350732272  |
| NM_016605    | FAM53C | 2237 | 2273 | 8.36060574754  |
| NM_016605    | FAM53C | 2393 | 2459 | 8.44072735675  |
| NM_016605    | FAM53C | 2496 | 2576 | 9.44474472101  |
| NM_016605    | FAM53C | 514  | 576  | 8.36060574754  |
| NM_016605    | FAM53C | 1041 | 1102 | 8.36060574754  |
| NM_016605    | FAM53C | 3744 | 3865 | 8.44474495693  |
| NM_016605    | FAM53C | 1533 | 1680 | 9.02970745765  |
| NM_016605    | FAM53C | 3967 | 4125 | 9.76667305182  |
| NM_015250    | BICD2  | 978  | 1124 | 6.28576907173  |
| NM_032574    | DPY30  | 590  | 663  | 1.67714537575  |
| NM_032574    | DPY30  | 184  | 236  | 1.6731277758   |

|              |        |      |      |               |
|--------------|--------|------|------|---------------|
| NM_033624    | FBX021 | 428  | 491  | 7.81179108746 |
| NM_033624    | FBX021 | 638  | 691  | 7.22682185568 |
| NM_033624    | FBX021 | 337  | 400  | 6.22281098656 |
| NM_033624    | FBX021 | 787  | 851  | 7.22682857919 |
| NM_033624    | FBX021 | 113  | 189  | 7.22682858673 |
| NM_033624    | FBX021 | 1757 | 1852 | 7.22281098656 |
| NM_033624    | FBX021 | 1545 | 1614 | 8.22682858674 |
| NM_001935    | DPP4   | 562  | 624  | 4.36514274095 |
| NM_001935    | DPP4   | 818  | 872  | 5.36514274095 |
| NM_001935    | DPP4   | 2095 | 2155 | 5.58753516229 |
| NM_001935    | DPP4   | 3127 | 3209 | 4.78018024022 |
| NM_001935    | DPP4   | 3049 | 3104 | 4.78017350918 |
| NM_001935    | DPP4   | 2218 | 2272 | 5.10210833512 |
| NM_001935    | DPP4   | 956  | 1002 | 4.28100353157 |
| NM_001935    | DPP4   | 2317 | 2383 | 3.78018024023 |
| NM_001935    | DPP4   | 1242 | 1304 | 4.36514274095 |
| NM_001935    | DPP4   | 1047 | 1084 | 4.36112514078 |
| NM_001935    | DPP4   | 2692 | 2811 | 4.36514274095 |
| NM_001935    | DPP4   | 1945 | 2094 | 5.78018024023 |
| NM_001935    | DPP4   | 1478 | 1655 | 5.95010524167 |
| NM_001935    | DPP4   | 1707 | 1810 | 4.36514274095 |
| NM_001935    | DPP4   | 2505 | 2645 | 5.10210833512 |
| NM_001935    | DPP4   | 1306 | 1424 | 6.10210833512 |
| NM_001935    | DPP4   | 1084 | 1233 | 5.10210833512 |
| NM_001935    | DPP4   | 2881 | 2959 | 4.3651360099  |
| NM_001935    | DPP4   | 1861 | 1909 | 3.69604103085 |
| NM_001935    | DPP4   | 627  | 804  | 6.36514274095 |
| NM_001935    | DPP4   | 2391 | 2502 | 5.10210833512 |
| NM_001392    | DTNA   | 1362 | 1428 | 8.65006594773 |
| NM_001392    | DTNA   | 530  | 653  | 10.2350284484 |
| NM_001392    | DTNA   | 147  | 217  | 9.65006571181 |
| NM_001242868 | SLAIN1 | 2565 | 2635 | 11.5658193217 |
| NM_001931    | DLAT   | 1041 | 1095 | 6.68464856061 |
| NM_001931    | DLAT   | 2605 | 2648 | 5.60068310154 |
| NM_001931    | DLAT   | 1757 | 1816 | 6.68482207501 |
| NM_001931    | DLAT   | 1618 | 1695 | 5.68080471076 |
| NM_001931    | DLAT   | 2325 | 2384 | 5.68080471076 |
| NM_001931    | DLAT   | 2187 | 2224 | 5.60068310154 |
| NM_001931    | DLAT   | 643  | 726  | 6.68482231071 |
| NM_001396    | DYRK1A | 41   | 79   | 7.39199915195 |
| NM_001396    | DYRK1A | 3650 | 3715 | 7.97696164512 |
| NM_001396    | DYRK1A | 3478 | 3517 | 7.38798155177 |
| NM_001396    | DYRK1A | 828  | 864  | 6.30785994256 |
| NM_001396    | DYRK1A | 1781 | 1830 | 6.30785994256 |
| NM_001396    | DYRK1A | 3518 | 3574 | 7.39199915172 |
| NM_001396    | DYRK1A | 2478 | 2542 | 6.38798155177 |
| NM_001396    | DYRK1A | 879  | 922  | 6.30785994256 |
| NM_001396    | DYRK1A | 547  | 632  | 8.39199915195 |
| NM_001396    | DYRK1A | 2136 | 2236 | 7.39182540163 |
| NM_004145    | MY09B  | 2548 | 2607 | 6.82712353075 |

|              |          |      |      |                    |
|--------------|----------|------|------|--------------------|
| NM_004145    | MY09B    | 2681 | 2769 | 7.8271302618       |
| NM_004145    | MY09B    | 1216 | 1302 | 6.82713026181      |
| NM_004145    | MY09B    | 278  | 306  | 6.82311266163      |
| NM_004145    | MY09B    | 3729 | 3800 | 6.74299105242      |
| NM_004145    | MY09B    | 5737 | 5791 | 8.41209276253      |
| NM_004145    | MY09B    | 6996 | 7057 | 6.82311266163      |
| NM_004145    | MY09B    | 833  | 895  | 8.41209276252      |
| NM_004145    | MY09B    | 573  | 629  | 7.82311266163      |
| NM_004145    | MY09B    | 4665 | 4736 | 8.40807516236      |
| NM_004145    | MY09B    | 4826 | 4867 | 7.82695651149      |
| NM_004145    | MY09B    | 5214 | 5271 | 6.82695651149      |
| NM_004145    | MY09B    | 333  | 375  | 7.82311266163      |
| NM_004145    | MY09B    | 1854 | 1886 | 6.74299105242      |
| NM_004145    | MY09B    | 7313 | 7361 | 6.74299105242      |
| NM_004145    | MY09B    | 3009 | 3075 | 6.82713026181      |
| NM_004145    | MY09B    | 1983 | 2129 | 8.82713026181      |
| NM_004145    | MY09B    | 6857 | 6951 | 8.82713026181      |
| NM_004145    | MY09B    | 6640 | 6705 | 7.82695651149      |
| NM_001398    | ECH1     | 574  | 662  | 6.57640414736      |
| NM_001398    | ECH1     | 1127 | 1220 | 6.38375906942      |
| NM_001398    | ECH1     | 663  | 767  | 4.57640414736      |
| NM_001398    | ECH1     | 772  | 855  | 3.57640414736      |
| NM_001398    | ECH1     | 889  | 1084 | 6.74632914881      |
| NM_001398    | ECH1     | 83   | 549  | 8.66386698861      |
| NM_013327    | PARVB    | 327  | 449  | 13.195999151       |
| NM_013327    | PARVB    | 1029 | 1092 | 11.1919815508      |
| NM_001145418 | TTC28    | 5902 | 5969 | 9.27615100346      |
| NM_001145418 | TTC28    | 315  | 427  | 9.27615100346      |
| NM_080660    | ZC3HAV1L |      | 1154 | 1183 10.9135681513 |
| NM_015360    | SKIV2L2  | 2867 | 2975 | 6.33224855846      |
| NM_015360    | SKIV2L2  | 1174 | 1234 | 4.74326845757      |
| NM_015360    | SKIV2L2  | 2800 | 2860 | 4.74728582182      |
| NM_015360    | SKIV2L2  | 1011 | 1066 | 6.74728605774      |
| NM_015360    | SKIV2L2  | 1084 | 1131 | 5.66314684835      |
| NM_015360    | SKIV2L2  | 2330 | 2386 | 6.74728605774      |
| NM_015360    | SKIV2L2  | 2594 | 2688 | 4.74728605019      |
| NM_015360    | SKIV2L2  | 936  | 1003 | 4.74728605774      |
| NM_015360    | SKIV2L2  | 1818 | 1893 | 4.74728605774      |
| NM_018201    | TBC1D13  | 1523 | 1589 | 9.36202320766      |
| NM_018201    | TBC1D13  | 1786 | 1847 | 8.77723422134      |
| NM_018201    | TBC1D13  | 2993 | 3032 | 8.77706070694      |
| NM_018201    | TBC1D13  | 1195 | 1257 | 9.36202320766      |
| NM_018202    | TMEM57   | 1130 | 1193 | 6.84011951771      |
| NM_018202    | TMEM57   | 600  | 643  | 5.03276459565      |
| NM_018202    | TMEM57   | 436  | 525  | 7.03276459565      |
| NM_018202    | TMEM57   | 2167 | 2227 | 5.61772709638      |
| NM_018202    | TMEM57   | 2381 | 2418 | 4.03259084534      |
| NM_018202    | TMEM57   | 1327 | 1370 | 5.0327578646       |
| NM_018202    | TMEM57   | 647  | 756  | 7.03276459565      |
| NM_018202    | TMEM57   | 1771 | 1844 | 5.61772709638      |

|           |         |      |      |                |
|-----------|---------|------|------|----------------|
| NM_018202 | TMEM57  | 2016 | 2083 | 4.03259084534  |
| NM_018202 | TMEM57  | 1392 | 1576 | 5.61772709638  |
| NM_018202 | TMEM57  | 254  | 427  | 7.03276459565  |
| NM_018202 | TMEM57  | 2419 | 2515 | 5.61772036532  |
| NM_018204 | CKAP2   | 981  | 1045 | 5.01177614025  |
| NM_018204 | CKAP2   | 545  | 606  | 6.0156199901   |
| NM_018204 | CKAP2   | 2280 | 2346 | 5.01578700937  |
| NM_018204 | CKAP2   | 1121 | 1165 | 6.01177614025  |
| NM_018204 | CKAP2   | 336  | 383  | 5.0156199901   |
| NM_018204 | CKAP2   | 3348 | 3425 | 4.93165453104  |
| NM_001428 | EN01    | 1070 | 1608 | 2.70636188091  |
| NM_001428 | EN01    | 1608 | 1837 | 1.84576493757  |
| NM_001428 | EN01    | 1840 | 1913 | -1.08023448099 |
| NM_001428 | EN01    | 392  | 1067 | 3.25604890688  |
| NM_001428 | EN01    | 1948 | 2180 | 1.05726904276  |
| NM_080669 | SLC46A1 | 2438 | 2489 | 8.00644691346  |
| NM_080669 | SLC46A1 | 1576 | 1630 | 9.59140940685  |
| NM_080669 | SLC46A1 | 2739 | 2850 | 8.00644018263  |
| NM_080669 | SLC46A1 | 2212 | 2291 | 9.00644667776  |
| NM_080669 | SLC46A1 | 628  | 680  | 9.59140917849  |
| NM_080669 | SLC46A1 | 340  | 430  | 11.1763719151  |
| NM_080669 | SLC46A1 | 5911 | 5970 | 8.00627316336  |
| NM_080669 | SLC46A1 | 2333 | 2381 | 8.00644018263  |
| NM_080669 | SLC46A1 | 1377 | 1479 | 9.5914094144   |
| NM_080669 | SLC46A1 | 3208 | 3262 | 8.00644018263  |
| NM_080669 | SLC46A1 | 6196 | 6296 | 10.0064469137  |
| NM_080669 | SLC46A1 | 5813 | 5882 | 9.59123566409  |
| NM_080669 | SLC46A1 | 1264 | 1375 | 10.0064469137  |
| NM_080669 | SLC46A1 | 1192 | 1254 | 9.00644691368  |
| NM_080669 | SLC46A1 | 6005 | 6071 | 9.00644691368  |
| NM_080669 | SLC46A1 | 488  | 624  | 10.0064469137  |
| NM_080669 | SLC46A1 | 917  | 1153 | 11.3283750086  |
| NM_080668 | CDCA5   | 2298 | 2349 | 7.58251695701  |
| NM_080668 | CDCA5   | 2114 | 2192 | 9.25161866712  |
| NM_080668 | CDCA5   | 2352 | 2410 | 8.66665616639  |
| NM_080668 | CDCA5   | 347  | 427  | 9.16747945773  |
| NM_080668 | CDCA5   | 2528 | 2599 | 8.66664943534  |
| NM_080668 | CDCA5   | 1013 | 1076 | 9.24760106694  |
| NM_080668 | CDCA5   | 2036 | 2097 | 9.16747945773  |
| NM_080668 | CDCA5   | 1974 | 2034 | 10.2516186596  |
| NM_080668 | CDCA5   | 829  | 906  | 8.66648241608  |
| NM_080668 | CDCA5   | 1488 | 1618 | 9.98858426128  |
| NM_012329 | MMD     | 717  | 792  | 5.12498628685  |
| NM_012329 | MMD     | 797  | 838  | 5.54002377858  |
| NM_012329 | MMD     | 1857 | 1922 | 5.86195188102  |
| NM_012329 | MMD     | 1083 | 1143 | 3.54001705508  |
| NM_012329 | MMD     | 1200 | 1271 | 4.54002378612  |
| NM_012329 | MMD     | 2097 | 2130 | 3.53600618596  |
| NM_012329 | MMD     | 988  | 1032 | 4.53600618596  |
| NM_012329 | MMD     | 2533 | 2588 | 5.54002377858  |

|           |          |      |      |                    |
|-----------|----------|------|------|--------------------|
| NM_012329 | MMD      | 2219 | 2318 | 5.86195188102      |
| NM_012329 | MMD      | 234  | 276  | 4.54002377858      |
| NM_012329 | MMD      | 100  | 153  | 3.53600618596      |
| NM_012329 | MMD      | 2623 | 2695 | 4.54001705508      |
| NM_012329 | MMD      | 1669 | 1698 | 4.45588457675      |
| NM_012329 | MMD      | 589  | 712  | 6.70994878757      |
| NM_012329 | MMD      | 405  | 582  | 6.70994878757      |
| NM_012329 | MMD      | 2411 | 2531 | 4.54002378591      |
| NM_012329 | MMD      | 278  | 373  | 5.54002378613      |
| NM_012328 | DNAJB9   | 902  | 1002 | 4.45185185921      |
| NM_012328 | DNAJB9   | 797  | 872  | 4.44783449496      |
| NM_012328 | DNAJB9   | 703  | 780  | 6.03681435994      |
| NM_012328 | DNAJB9   | 610  | 698  | 7.25920701719      |
| NM_012328 | DNAJB9   | 1005 | 1138 | 7.03681459585      |
| NM_012328 | DNAJB9   | 326  | 393  | 4.44783449496      |
| NM_012328 | DNAJB9   | 1745 | 1884 | 6.77378019002      |
| NM_012325 | MAPRE1   | 1748 | 1807 | 2.35471445837      |
| NM_012325 | MAPRE1   | 1584 | 1644 | 0.769751957426     |
| NM_012325 | MAPRE1   | 2464 | 2519 | 2.76975195765      |
| NM_012325 | MAPRE1   | 57   | 615  | 6.62773295278      |
| NM_012325 | MAPRE1   | 632  | 1066 | 6.19601671235      |
| NM_012325 | MAPRE1   | 1381 | 1575 | 4.22918357629      |
| NM_012325 | MAPRE1   | 1815 | 2066 | 5.01767947109      |
| NM_012325 | MAPRE1   | 2096 | 2430 | 6.47019167579      |
| NM_012325 | MAPRE1   | 1068 | 1328 | 4.67664255326      |
| NM_012324 | MAPK8IP2 |      | 2872 | 2946 11.0513038183 |
| NM_012327 | PIGN     | 2102 | 2138 | 7.51179409424      |
| NM_012327 | PIGN     | 501  | 540  | 9.01663498575      |
| NM_012327 | PIGN     | 2787 | 2839 | 7.51179409424      |
| NM_012327 | PIGN     | 363  | 458  | 10.5158116944      |
| NM_012321 | LSM4     | 505  | 537  | 4.28784660564      |
| NM_012321 | LSM4     | 638  | 682  | 5.28784660564      |
| NM_012321 | LSM4     | 166  | 355  | 8.7472782245       |
| NM_012321 | LSM4     | 893  | 1013 | 7.28784660587      |
| NM_012321 | LSM4     | 759  | 877  | 5.87280910659      |
| NM_012320 | PLA2G15  | 2657 | 2719 | 8.52907787329      |
| NM_012320 | PLA2G15  | 296  | 364  | 9.53309547346      |
| NM_012320 | PLA2G15  | 1119 | 1199 | 9.2700610674       |
| NM_012320 | PLA2G15  | 1531 | 1600 | 7.94795922242      |
| NM_012320 | PLA2G15  | 539  | 579  | 6.94795922242      |
| NM_012320 | PLA2G15  | 1401 | 1461 | 6.94795922242      |
| NM_012320 | PLA2G15  | 110  | 190  | 6.94812624168      |
| NM_012322 | LSM5     | 267  | 329  | 7.18152212361      |
| NM_012322 | LSM5     | 59   | 259  | 7.98887704567      |
| NM_014949 | KIAA0907 |      | 2651 | 2740 7.79947794915 |
| NM_014949 | KIAA0907 |      | 466  | 538 6.79947121809  |
| NM_014949 | KIAA0907 |      | 1084 | 1124 6.79546034898 |
| NM_014949 | KIAA0907 |      | 942  | 1023 6.79947794893 |
| NM_014949 | KIAA0907 |      | 1866 | 1990 9.38444044987 |
| NM_014949 | KIAA0907 |      | 2569 | 2639 6.71533873976 |

|           |          |      |      |      |               |
|-----------|----------|------|------|------|---------------|
| NM_014949 | KIAA0907 |      | 541  | 610  | 6.79947794914 |
| NM_014949 | KIAA0907 |      | 316  | 397  | 8.38444021395 |
| NM_014949 | KIAA0907 |      | 2756 | 2909 | 10.3844404499 |
| NM_014949 | KIAA0907 |      | 2309 | 2458 | 8.79947794915 |
| NM_014949 | KIAA0907 |      | 1674 | 1798 | 9.12140604404 |
| NM_014948 | UBOX5    | 3176 | 3214 |      | 8.39728470278 |
| NM_014943 | ZHX2     | 1362 | 1424 |      | 5.96517078212 |
| NM_014941 | MORC2    | 1902 | 1942 |      | 6.02702243618 |
| NM_014941 | MORC2    | 4001 | 4079 |      | 6.0271961865  |
| NM_014941 | MORC2    | 1651 | 1718 |      | 5.0271961865  |
| NM_014941 | MORC2    | 3480 | 3520 |      | 5.02702243618 |
| NM_014941 | MORC2    | 2967 | 3049 |      | 5.0271961865  |
| NM_014941 | MORC2    | 4137 | 4192 |      | 5.02719618628 |
| NM_014941 | MORC2    | 2564 | 2610 |      | 5.02702243618 |
| NM_014941 | MORC2    | 4210 | 4257 |      | 6.02317858633 |
| NM_014941 | MORC2    | 278  | 311  |      | 5.02317858633 |
| NM_014941 | MORC2    | 1421 | 1466 |      | 5.02702243618 |
| NM_014941 | MORC2    | 2663 | 2727 |      | 6.61215195617 |
| NM_014941 | MORC2    | 2759 | 2786 |      | 5.02317858633 |
| NM_014941 | MORC2    | 1731 | 1847 |      | 6.6119849369  |
| NM_014941 | MORC2    | 115  | 243  |      | 6.0271961865  |
| NM_014941 | MORC2    | 3819 | 3947 |      | 7.0271961865  |
| NM_014941 | MORC2    | 2225 | 2350 |      | 7.34912428139 |
| NM_014941 | MORC2    | 1329 | 1396 |      | 6.612158687   |
| NM_014412 | CACYBP   | 966  | 1262 |      | 6.59719487304 |
| NM_014412 | CACYBP   | 351  | 685  |      | 6.33416046721 |
| NM_014412 | CACYBP   | 760  | 942  |      | 5.01223237232 |
| NM_014944 | CLSTN1   | 2305 | 2434 |      | 7.93304368984 |
| NM_014944 | CLSTN1   | 1529 | 1597 |      | 4.93304368984 |
| NM_014944 | CLSTN1   | 2688 | 2745 |      | 4.93304345392 |
| NM_014944 | CLSTN1   | 4417 | 4475 |      | 4.93304368229 |
| NM_014944 | CLSTN1   | 2957 | 3002 |      | 3.93303695878 |
| NM_014944 | CLSTN1   | 903  | 960  |      | 3.93304368983 |
| NM_014944 | CLSTN1   | 3215 | 3272 |      | 4.93304368962 |
| NM_014944 | CLSTN1   | 1797 | 1883 |      | 5.51800619034 |
| NM_014944 | CLSTN1   | 1653 | 1688 |      | 3.84890448045 |
| NM_014944 | CLSTN1   | 3283 | 3344 |      | 6.51800619056 |
| NM_014944 | CLSTN1   | 3681 | 3746 |      | 5.93304368984 |
| NM_014944 | CLSTN1   | 4616 | 4668 |      | 3.92902608966 |
| NM_014944 | CLSTN1   | 1046 | 1155 |      | 6.25497178472 |
| NM_014944 | CLSTN1   | 3348 | 3455 |      | 5.51800619056 |
| NM_014944 | CLSTN1   | 1380 | 1471 |      | 5.93304368984 |
| NM_014944 | CLSTN1   | 2518 | 2616 |      | 5.51800619056 |
| NM_014944 | CLSTN1   | 1294 | 1376 |      | 4.93304345392 |
| NM_014944 | CLSTN1   | 4105 | 4291 |      | 7.93304368984 |
| NM_014944 | CLSTN1   | 3003 | 3132 |      | 6.25497178472 |
| NM_014944 | CLSTN1   | 4908 | 5042 |      | 5.93304368984 |
| NM_014944 | CLSTN1   | 2774 | 2915 |      | 5.51800619056 |
| NM_014944 | CLSTN1   | 1886 | 2248 |      | 8.18097120328 |
| NM_014944 | CLSTN1   | 963  | 1043 |      | 5.51800619056 |

|              |         |       |       |               |
|--------------|---------|-------|-------|---------------|
| NM_014944    | CLSTN1  | 3755  | 3852  | 6.25497178472 |
| NM_005077    | TLE1    | 1768  | 1829  | 5.86826004648 |
| NM_005077    | TLE1    | 709   | 774   | 5.86826004648 |
| NM_005077    | TLE1    | 922   | 968   | 7.4532225472  |
| NM_005077    | TLE1    | 1992  | 2088  | 6.4532225472  |
| NM_005077    | TLE1    | 3101  | 3162  | 6.45322253965 |
| NM_005077    | TLE1    | 20    | 68    | 6.45321581615 |
| NM_005077    | TLE1    | 2596  | 2636  | 6.45304879689 |
| NM_005077    | TLE1    | 563   | 611   | 6.36908333782 |
| NM_005077    | TLE1    | 1118  | 1223  | 7.4532225472  |
| NM_005077    | TLE1    | 2284  | 2377  | 5.86826004648 |
| NM_005077    | TLE1    | 2637  | 2721  | 5.86826004648 |
| NM_005073    | SLC15A1 | 1085  | 1136  | 13.6691011826 |
| NM_005073    | SLC15A1 | 2023  | 2087  | 13.3471730875 |
| NM_005073    | SLC15A1 | 1521  | 1586  | 13.3471730877 |
| NM_005073    | SLC15A1 | 225   | 331   | 12.3471730877 |
| NM_005073    | SLC15A1 | 995   | 1081  | 12.9319618381 |
| NM_005073    | SLC15A1 | 427   | 546   | 13.6691011826 |
| NM_005073    | SLC15A1 | 1840  | 1925  | 11.3471730877 |
| NM_005073    | SLC15A1 | 125   | 221   | 11.3471663566 |
| NM_032390    | MKI67IP | 298   | 401   | 6.10411547124 |
| NM_032390    | MKI67IP | 500   | 603   | 3.29676031327 |
| NM_032390    | MKI67IP | 807   | 880   | 3.29658679887 |
| NM_032390    | MKI67IP | 220   | 291   | 4.29274294901 |
| NM_001105192 | TLE3    | 3322  | 3367  | 7.83223167352 |
| NM_001105192 | TLE3    | 194   | 253   | 6.25128004191 |
| NM_001105192 | TLE3    | 445   | 511   | 6.25128677297 |
| NM_001105192 | TLE3    | 3428  | 3462  | 6.16714756358 |
| NM_001105192 | TLE3    | 1048  | 1116  | 7.25111302265 |
| NM_005079    | TPD52   | 1099  | 1171  | 5.23706413485 |
| NM_005079    | TPD52   | 399   | 453   | 4.2330467706  |
| NM_018064    | AKIRIN2 | 96    | 137   | 6.16579940811 |
| NM_018064    | AKIRIN2 | 449   | 496   | 4.58066988812 |
| NM_018064    | AKIRIN2 | 515   | 563   | 4.49670442906 |
| NM_018064    | AKIRIN2 | 175   | 247   | 4.58084363089 |
| NM_015097    | CLASP2  | 4050  | 4100  | 8.6968422728  |
| NM_018066    | GPN2    | 544   | 626   | 9.64285344694 |
| NM_018066    | GPN2    | 741   | 796   | 9.05789744135 |
| NM_018066    | GPN2    | 815   | 888   | 9.05789744135 |
| NM_018067    | MAP7D1  | 3102  | 3162  | 8.27338654789 |
| NM_018067    | MAP7D1  | 1246  | 1322  | 7.27338005275 |
| NM_015092    | SMG1    | 6744  | 6802  | 4.96208410636 |
| NM_015092    | SMG1    | 2661  | 2706  | 6.46290740525 |
| NM_015092    | SMG1    | 8723  | 8816  | 6.9620841139  |
| NM_015092    | SMG1    | 5371  | 5454  | 4.96207738285 |
| NM_015092    | SMG1    | 915   | 967   | 5.96208411391 |
| NM_015092    | SMG1    | 14801 | 14864 | 5.96208410636 |
| NM_015092    | SMG1    | 1432  | 1526  | 6.96208411391 |
| NM_015092    | SMG1    | 398   | 462   | 4.96208411369 |
| NM_015092    | SMG1    | 13254 | 13349 | 5.96208410636 |

|           |         |       |       |               |
|-----------|---------|-------|-------|---------------|
| NM_015092 | SMG1    | 6805  | 6871  | 4.96208411391 |
| NM_015092 | SMG1    | 1299  | 1362  | 4.96208411391 |
| NM_015092 | SMG1    | 4134  | 4191  | 4.96207738285 |
| NM_015092 | SMG1    | 15511 | 15597 | 6.54704661462 |
| NM_015092 | SMG1    | 4600  | 4657  | 5.95806651374 |
| NM_015092 | SMG1    | 1387  | 1429  | 4.96208411369 |
| NM_015092 | SMG1    | 4450  | 4501  | 5.96208411391 |
| NM_015092 | SMG1    | 9724  | 9789  | 4.96208411391 |
| NM_015092 | SMG1    | 2706  | 2737  | 4.95806651374 |
| NM_015092 | SMG1    | 9683  | 9717  | 4.87794490452 |
| NM_015092 | SMG1    | 8975  | 9029  | 5.96208411391 |
| NM_015092 | SMG1    | 10015 | 10086 | 6.54687286431 |
| NM_015092 | SMG1    | 6154  | 6191  | 4.96191036359 |
| NM_015092 | SMG1    | 3387  | 3563  | 8.66252383205 |
| NM_015092 | SMG1    | 6023  | 6078  | 6.96208411369 |
| NM_015092 | SMG1    | 2105  | 2264  | 7.96208411391 |
| NM_015092 | SMG1    | 2526  | 2645  | 7.54704661463 |
| NM_015092 | SMG1    | 6916  | 6998  | 5.96208411391 |
| NM_015092 | SMG1    | 5692  | 5757  | 5.95806651374 |
| NM_015092 | SMG1    | 8851  | 8960  | 7.54704661463 |
| NM_015092 | SMG1    | 4664  | 4707  | 4.87794490452 |
| NM_015092 | SMG1    | 3931  | 4117  | 8.2840122088  |
| NM_015092 | SMG1    | 297   | 342   | 4.96191036359 |
| NM_015092 | SMG1    | 9412  | 9526  | 6.54704661463 |
| NM_015092 | SMG1    | 10393 | 10585 | 7.2840122088  |
| NM_015092 | SMG1    | 3096  | 3353  | 9.13200911535 |
| NM_015092 | SMG1    | 14093 | 14203 | 5.96208411391 |
| NM_015092 | SMG1    | 8627  | 8686  | 4.95806651374 |
| NM_015092 | SMG1    | 1644  | 1955  | 10.0913671309 |
| NM_015092 | SMG1    | 7341  | 7420  | 6.54704661441 |
| NM_015092 | SMG1    | 2264  | 2479  | 9.04954695516 |
| NM_015092 | SMG1    | 1961  | 2087  | 7.96208411391 |
| NM_015092 | SMG1    | 9622  | 9682  | 5.96208410636 |
| NM_015092 | SMG1    | 4192  | 4440  | 8.54704661463 |
| NM_015092 | SMG1    | 15792 | 15906 | 6.54704661463 |
| NM_015092 | SMG1    | 4861  | 5068  | 7.2840122088  |
| NM_015092 | SMG1    | 7167  | 7322  | 5.9620841139  |
| NM_015092 | SMG1    | 496   | 589   | 6.96208411391 |
| NM_015092 | SMG1    | 13929 | 14002 | 4.95806651374 |
| NM_015092 | SMG1    | 978   | 1106  | 6.54704661463 |
| NM_015092 | SMG1    | 12081 | 12225 | 7.2840122088  |
| NM_015092 | SMG1    | 2894  | 3052  | 8.66252383205 |
| NM_015092 | SMG1    | 3563  | 3749  | 8.76943903597 |
| NM_015092 | SMG1    | 14344 | 14548 | 7.76943903597 |
| NM_015092 | SMG1    | 3774  | 3924  | 8.42151573255 |
| NM_015092 | SMG1    | 2775  | 2850  | 5.96208410636 |
| NM_015092 | SMG1    | 7737  | 7905  | 6.54704661463 |
| NM_018061 | PRPF38B | 61    | 109   | 3.13944000702 |
| NM_018061 | PRPF38B | 1804  | 1873  | 3.14328385687 |
| NM_018061 | PRPF38B | 414   | 534   | 4.72842010791 |



|              |         |      |      |               |
|--------------|---------|------|------|---------------|
| NM_018061    | PRPF38B | 1018 | 1058 | 3.05931839781 |
| NM_018061    | PRPF38B | 732  | 787  | 4.05931839781 |
| NM_018061    | PRPF38B | 788  | 881  | 4.72842010791 |
| NM_018062    | FANCL   | 1070 | 1122 | 5.80407195045 |
| NM_018062    | FANCL   | 558  | 613  | 5.80407195045 |
| NM_018062    | FANCL   | 913  | 1014 | 8.12617379565 |
| NM_018062    | FANCL   | 1497 | 1618 | 7.38920820148 |
| NM_018062    | FANCL   | 260  | 341  | 5.80407195045 |
| NM_018063    | HELLS   | 321  | 383  | 6.84292947588 |
| NM_018063    | HELLS   | 1590 | 1650 | 7.84292947588 |
| NM_018063    | HELLS   | 814  | 881  | 8.84292275237 |
| NM_018063    | HELLS   | 1652 | 1701 | 6.8429294832  |
| NM_018063    | HELLS   | 2165 | 2208 | 6.83891188325 |
| NM_018063    | HELLS   | 1090 | 1161 | 7.84292275237 |
| NM_018063    | HELLS   | 2393 | 2484 | 7.84292948342 |
| NM_018063    | HELLS   | 1484 | 1568 | 8.8429294832  |
| NM_018063    | HELLS   | 1262 | 1356 | 9.16485757831 |
| NM_018063    | HELLS   | 2875 | 2930 | 7.8429294832  |
| NM_018063    | HELLS   | 1051 | 1082 | 8.42771823383 |
| NM_018063    | HELLS   | 2987 | 3106 | 8.84292948343 |
| NM_018063    | HELLS   | 2630 | 2761 | 7.84292948343 |
| NM_018063    | HELLS   | 1363 | 1436 | 8.42789198393 |
| NM_018063    | HELLS   | 932  | 1034 | 8.42789198415 |
| NM_018063    | HELLS   | 1872 | 2088 | 10.4278919841 |
| NM_018063    | HELLS   | 2769 | 2858 | 8.42789198415 |
| NM_018063    | HELLS   | 1737 | 1838 | 8.42789198415 |
| NM_001009877 | BRD9    | 1161 | 1225 | 5.62456599653 |
| NM_001009877 | BRD9    | 1764 | 1893 | 7.29366770664 |
| NM_001798    | CDK2    | 659  | 709  | 6.58602895539 |
| NM_001798    | CDK2    | 69   | 121  | 7.58201135522 |
| NM_001798    | CDK2    | 207  | 264  | 7.58602871947 |
| NM_001798    | CDK2    | 982  | 1031 | 6.58201135522 |
| NM_001798    | CDK2    | 1173 | 1255 | 8.58602895517 |
| NM_001798    | CDK2    | 712  | 767  | 7.58602895517 |
| NM_001798    | CDK2    | 1094 | 1162 | 7.58602895539 |
| NM_001798    | CDK2    | 1973 | 2056 | 7.58602894784 |
| NM_001798    | CDK2    | 773  | 944  | 10.045460574  |
| NM_001798    | CDK2    | 2085 | 2171 | 8.17099145611 |
| NM_001798    | CDK2    | 375  | 650  | 10.2864686735 |
| NM_130464    | NPIPL3  | 1054 | 1113 | 5.06085594943 |
| NM_130464    | NPIPL3  | 476  | 560  | 7.06085594943 |
| NM_130464    | NPIPL3  | 732  | 788  | 5.06085594943 |
| NM_130464    | NPIPL3  | 1670 | 1775 | 6.64581845015 |
| NM_130464    | NPIPL3  | 3315 | 3401 | 6.06085594943 |
| NM_130464    | NPIPL3  | 2390 | 2424 | 5.06085594921 |
| NM_130464    | NPIPL3  | 2138 | 2171 | 5.06085594943 |
| NM_130464    | NPIPL3  | 3402 | 3554 | 8.06085594943 |
| NM_130464    | NPIPL3  | 2517 | 2626 | 7.06085594943 |
| NM_130464    | NPIPL3  | 1543 | 1634 | 6.06085594943 |
| NM_130464    | NPIPL3  | 3228 | 3308 | 6.06085594943 |

|           |         |      |      |               |
|-----------|---------|------|------|---------------|
| NM_130464 | NPIPL3  | 816  | 1047 | 7.86821087149 |
| NM_130464 | NPIPL3  | 197  | 338  | 6.64581845015 |
| NM_130464 | NPIPL3  | 343  | 451  | 7.06085594943 |
| NM_130464 | NPIPL3  | 2693 | 2944 | 8.23078095087 |
| NM_130464 | NPIPL3  | 1203 | 1535 | 9.06085594943 |
| NM_130464 | NPIPL3  | 1782 | 2134 | 8.52028756807 |
| NM_130464 | NPIPL3  | 2945 | 3219 | 7.06085594943 |
| NM_130464 | NPIPL3  | 2174 | 2383 | 7.64581845015 |
| NM_130464 | NPIPL3  | 48   | 117  | 6.06085594943 |
| NM_001829 | CLCN3   | 3539 | 3598 | 6.90736975329 |
| NM_001829 | CLCN3   | 2859 | 2911 | 7.90736974574 |
| NM_001829 | CLCN3   | 5491 | 5544 | 6.90335215312 |
| NM_001829 | CLCN3   | 1351 | 1423 | 5.90736975329 |
| NM_001829 | CLCN3   | 6042 | 6087 | 5.82323054391 |
| NM_001829 | CLCN3   | 1910 | 2051 | 9.07729475473 |
| NM_001829 | CLCN3   | 763  | 806  | 7.49215850369 |
| NM_001829 | CLCN3   | 2150 | 2221 | 5.90335215312 |
| NM_001829 | CLCN3   | 686  | 740  | 7.48831465384 |
| NM_001829 | CLCN3   | 2683 | 2753 | 8.22929761226 |
| NM_001829 | CLCN3   | 1782 | 1865 | 8.49233225401 |
| NM_001829 | CLCN3   | 2498 | 2609 | 7.90736975329 |
| NM_001829 | CLCN3   | 2284 | 2396 | 7.49233225401 |
| NM_001829 | CLCN3   | 988  | 1036 | 6.90335215312 |
| NM_001826 | CKS1B   | 247  | 309  | 6.38658534177 |
| NM_001826 | CKS1B   | 635  | 791  | 9.2936496877  |
| NM_001826 | CKS1B   | 372  | 552  | 9.77907651487 |
| NM_001826 | CKS1B   | 73   | 243  | 8.84619071073 |
| NM_001827 | CKS2    | 1    | 84   | 5.94835759975 |
| NM_001827 | CKS2    | 92   | 388  | 8.62642950486 |
| NM_001827 | CKS2    | 414  | 522  | 6.21139200558 |
| NM_001823 | CKB     | 728  | 844  | 5.35885647811 |
| NM_001823 | CKB     | 1151 | 1207 | 4.76987637721 |
| NM_001823 | CKB     | 193  | 238  | 3.76987637721 |
| NM_001823 | CKB     | 878  | 969  | 6.09582207227 |
| NM_001823 | CKB     | 1347 | 1448 | 6.09582207227 |
| NM_001823 | CKB     | 598  | 664  | 4.76987637721 |
| NM_001823 | CKB     | 1009 | 1137 | 3.77389397739 |
| NM_001792 | CDH2    | 3148 | 3210 | 4.78974857016 |
| NM_001792 | CDH2    | 2118 | 2157 | 4.70560959669 |
| NM_001792 | CDH2    | 509  | 616  | 5.78957505576 |
| NM_001821 | CHML    | 1302 | 1394 | 7.85734261834 |
| NM_022087 | GALNT11 | 168  | 207  | 8.6131448474  |
| NM_022087 | GALNT11 | 224  | 306  | 9.19810757649 |
| NM_022087 | GALNT11 | 95   | 133  | 9.11396837466 |
| NM_022087 | GALNT11 | 2366 | 2401 | 7.60912748315 |
| NM_022087 | GALNT11 | 2480 | 2552 | 8.61314507577 |
| NM_022488 | ATG3    | 329  | 406  | 4.30552530002 |
| NM_022483 | C5orf28 | 311  | 394  | 8.89390350644 |
| NM_022483 | C5orf28 | 1495 | 1533 | 7.22480180389 |
| NM_022483 | C5orf28 | 404  | 534  | 7.30894101327 |

|              |          |      |      |                   |
|--------------|----------|------|------|-------------------|
| NM_022486    | SUSD1    | 1745 | 1805 | 8.443913238       |
| NM_022486    | SUSD1    | 1054 | 1096 | 7.443913238       |
| NM_022486    | SUSD1    | 2561 | 2693 | 8.44391347392     |
| NM_022486    | SUSD1    | 1953 | 2068 | 9.02887597464     |
| NM_022485    | MTMR14   | 1239 | 1291 | 5.3077127846      |
| NM_152309    | PIK3AP1  | 2620 | 2668 | 8.99573628293     |
| NM_152309    | PIK3AP1  | 524  | 608  | 8.99974715205     |
| NM_152309    | PIK3AP1  | 2222 | 2279 | 8.99573628293     |
| NM_152309    | PIK3AP1  | 830  | 947  | 11.4591855017     |
| NM_152309    | PIK3AP1  | 1144 | 1181 | 7.91561467372     |
| NM_152309    | PIK3AP1  | 952  | 997  | 8.99573628293     |
| NM_152309    | PIK3AP1  | 307  | 378  | 8.99975364719     |
| NM_152309    | PIK3AP1  | 1002 | 1144 | 10.5847163838     |
| NM_032936    | TMEM60   | 116  | 165  | 8.84116995152     |
| NM_032936    | TMEM60   | 250  | 332  | 9.84116995907     |
| NM_032936    | TMEM60   | 213  | 248  | 7.84116322802     |
| NM_032936    | TMEM60   | 392  | 434  | 7.8371523589      |
| NM_032936    | TMEM60   | 352  | 391  | 8.8371523589      |
| NM_032936    | TMEM60   | 46   | 90   | 7.8371523589      |
| NM_032936    | TMEM60   | 455  | 543  | 9.42613245979     |
| NM_032936    | TMEM60   | 564  | 671  | 10.4261324598     |
| NM_000183    | HADHB    | 1416 | 1459 | 5.03276473117     |
| NM_000183    | HADHB    | 510  | 545  | 4.1168972095      |
| NM_000183    | HADHB    | 708  | 752  | 5.11288634038     |
| NM_000183    | HADHB    | 1169 | 1242 | 5.11288634038     |
| NM_000183    | HADHB    | 601  | 663  | 5.6978488411      |
| NM_000183    | HADHB    | 1500 | 1532 | 4.03276473117     |
| NM_000183    | HADHB    | 755  | 860  | 6.11690394055     |
| NM_000183    | HADHB    | 1254 | 1321 | 5.70186644127     |
| NM_000183    | HADHB    | 860  | 999  | 5.70186644127     |
| NM_001160116 | C15orf40 |      | 332  | 396 9.36760293494 |
| NM_032344    | NUDT22   | 693  | 755  | 11.6688747303     |
| NM_020931    | KIAA1586 |      | 281  | 348 6.41201452857 |
| NM_020935    | USP37    | 369  | 457  | 6.17050042413     |
| NM_020935    | USP37    | 1240 | 1324 | 7.17049392899     |
| NM_020937    | FANCM    | 152  | 209  | 9.75127924208     |
| NM_001172    | ARG2     | 244  | 329  | 5.9660599973      |
| NM_001172    | ARG2     | 1018 | 1105 | 4.38109726821     |
| NM_001172    | ARG2     | 144  | 216  | 4.38109726821     |
| NM_001172    | ARG2     | 329  | 373  | 4.37707990395     |
| NM_001172    | ARG2     | 1197 | 1277 | 5.38109726821     |
| NM_001172    | ARG2     | 680  | 841  | 7.70302559901     |
| NM_152307    | TRMT61A  | 421  | 469  | 11.1947127849     |
| NM_004671    | PIAS2    | 241  | 278  | 4.8180277527      |
| NM_004671    | PIAS2    | 1394 | 1474 | 4.89814936191     |
| NM_004672    | MAP3K6   | 578  | 617  | 12.3481263403     |
| NM_025214    | CCDC68   | 1658 | 1715 | 5.02652660219     |
| NM_025214    | CCDC68   | 3652 | 3703 | 6.11066557565     |
| NM_025214    | CCDC68   | 2539 | 2600 | 5.1066482114      |
| NM_025214    | CCDC68   | 184  | 240  | 6.02652660219     |

|              |          |      |      |                   |
|--------------|----------|------|------|-------------------|
| NM_025214    | CCDC68   | 3857 | 3889 | 5.02652660219     |
| NM_025214    | CCDC68   | 2219 | 2300 | 6.11049206125     |
| NM_025219    | DNAJC5   | 3397 | 3431 | 5.41488624053     |
| NM_025219    | DNAJC5   | 2937 | 2997 | 6.4189038407      |
| NM_025219    | DNAJC5   | 2533 | 2626 | 6.00386634143     |
| NM_025219    | DNAJC5   | 878  | 927  | 4.41890384071     |
| NM_025219    | DNAJC5   | 1619 | 1671 | 6.00386634142     |
| NM_025219    | DNAJC5   | 970  | 1009 | 4.33476463132     |
| NM_025219    | DNAJC5   | 565  | 647  | 4.41890360479     |
| NM_025219    | DNAJC5   | 1543 | 1605 | 6.41890384071     |
| NM_025219    | DNAJC5   | 2337 | 2428 | 6.00386634121     |
| NM_025219    | DNAJC5   | 3467 | 3506 | 6.65669272621     |
| NM_025219    | DNAJC5   | 2692 | 2776 | 4.4189038407      |
| NM_025219    | DNAJC5   | 3838 | 3973 | 6.41890384071     |
| NM_025219    | DNAJC5   | 4279 | 4474 | 7.00386634143     |
| NM_025219    | DNAJC5   | 1051 | 1179 | 6.00386634143     |
| NM_025219    | DNAJC5   | 1931 | 1997 | 5.41889710965     |
| NM_032340    | C6orf125 |      | 219  | 266 4.86292906418 |
| NM_032340    | C6orf125 |      | 467  | 524 6.86309608344 |
| NM_032340    | C6orf125 |      | 357  | 411 5.86309608344 |
| NM_032340    | C6orf125 |      | 66   | 169 7.67045773656 |
| NM_001135789 | PPIAL4C  | 523  | 565  | 6.92795395885     |
| NM_001135789 | PPIAL4C  | 152  | 213  | 6.19098836468     |
| NM_001135789 | PPIAL4C  | 243  | 281  | 6.60602586396     |
| NM_001135789 | PPIAL4C  | 607  | 641  | 6.60602586396     |
| NM_001135789 | PPIAL4C  | 369  | 458  | 8.41338078602     |
| NM_017802    | HEATR2   | 839  | 908  | 7.84150720808     |
| NM_017802    | HEATR2   | 1964 | 1996 | 7.75736799869     |
| NM_017802    | HEATR2   | 1575 | 1606 | 6.83748960791     |
| NM_017802    | HEATR2   | 1276 | 1348 | 9.16343530297     |
| NM_017802    | HEATR2   | 2768 | 2825 | 8.4264697088      |
| NM_017802    | HEATR2   | 3030 | 3097 | 6.83748960791     |
| NM_017802    | HEATR2   | 1862 | 1952 | 8.4264697088      |
| NM_017802    | HEATR2   | 1705 | 1817 | 8.4264697088      |
| NM_017802    | HEATR2   | 1480 | 1575 | 6.84150720808     |
| NM_017802    | HEATR2   | 2138 | 2314 | 8.4264697088      |
| NM_017802    | HEATR2   | 927  | 1026 | 7.84150720786     |
| NM_017802    | HEATR2   | 728  | 823  | 7.84150720808     |
| NM_017801    | CMTM6    | 2719 | 2783 | 8.11904779532     |
| NM_017801    | CMTM6    | 2318 | 2389 | 8.11503019537     |
| NM_017801    | CMTM6    | 2509 | 2590 | 9.119047788       |
| NM_017801    | CMTM6    | 985  | 1027 | 8.61987108688     |
| NM_017801    | CMTM6    | 256  | 334  | 9.70401029627     |
| NM_017801    | CMTM6    | 356  | 438  | 10.4409758904     |
| NM_017801    | CMTM6    | 737  | 798  | 7.11887404523     |
| NM_017801    | CMTM6    | 2073 | 2150 | 8.03490858616     |
| NM_017801    | CMTM6    | 2599 | 2676 | 9.44097565451     |
| NM_017801    | CMTM6    | 1611 | 1813 | 9.9264027176      |
| NM_017801    | CMTM6    | 465  | 706  | 11.8194875137     |
| NM_153812    | PHF13    | 3283 | 3398 | 7.65079921078     |

|           |         |      |      |               |
|-----------|---------|------|------|---------------|
| NM_153812 | PHF13   | 2119 | 2181 | 6.65062546047 |
| NM_153812 | PHF13   | 1238 | 1287 | 6.65079897487 |
| NM_153812 | PHF13   | 990  | 1079 | 7.65079247973 |
| NM_153812 | PHF13   | 411  | 520  | 7.65079921079 |
| NM_018976 | SLC38A2 | 3415 | 3468 | 2.15278834842 |
| NM_018976 | SLC38A2 | 3297 | 3344 | 2.73775061323 |
| NM_018976 | SLC38A2 | 4575 | 4632 | 2.1527883482  |
| NM_018976 | SLC38A2 | 4338 | 4525 | 4.96014327048 |
| NM_018976 | SLC38A2 | 4111 | 4187 | 3.96014327048 |
| NM_018976 | SLC38A2 | 3348 | 3407 | 2.73775084914 |
| NM_018976 | SLC38A2 | 2043 | 2346 | 6.43819056729 |
| NM_018976 | SLC38A2 | 4044 | 4082 | 2.06864913904 |
| NM_018976 | SLC38A2 | 2892 | 2954 | 3.15278834087 |
| NM_018976 | SLC38A2 | 172  | 417  | 6.40071586187 |
| NM_018976 | SLC38A2 | 4197 | 4293 | 3.47471644331 |
| NM_018976 | SLC38A2 | 434  | 1216 | 8.78941296897 |
| NM_018976 | SLC38A2 | 3034 | 3179 | 4.15278834842 |
| NM_018976 | SLC38A2 | 3179 | 3284 | 4.47471644331 |
| NM_018976 | SLC38A2 | 3488 | 3601 | 4.73775084914 |
| NM_018976 | SLC38A2 | 1218 | 2042 | 8.94069090781 |
| NM_018976 | SLC38A2 | 4660 | 4806 | 4.73775084914 |
| NM_018976 | SLC38A2 | 76   | 147  | 3.47471644331 |
| NM_018976 | SLC38A2 | 2675 | 2812 | 3.47471644331 |
| NM_018976 | SLC38A2 | 3777 | 4039 | 5.5451057712  |
| NM_018976 | SLC38A2 | 3616 | 3751 | 5.05967894403 |
| NM_172003 | CBWD2   | 562  | 603  | 5.70637602657 |
| NM_172003 | CBWD2   | 625  | 660  | 5.7062022838  |
| NM_172003 | CBWD2   | 442  | 507  | 5.70637603411 |
| NM_172003 | CBWD2   | 831  | 885  | 4.70637602657 |
| NM_172003 | CBWD2   | 885  | 966  | 6.29116478452 |
| NM_172003 | CBWD2   | 1061 | 1146 | 6.29133853484 |
| NM_172003 | CBWD2   | 313  | 425  | 7.02830412901 |
| NM_172003 | CBWD2   | 109  | 296  | 7.29133853484 |
| NM_172002 | HSCB    | 811  | 879  | 6.37350486687 |
| NM_016310 | POLR3K  | 400  | 482  | 9.12740195165 |
| NM_016312 | WBP11   | 2358 | 2444 | 5.87579207451 |
| NM_016312 | WBP11   | 126  | 188  | 4.5538639794  |
| NM_016312 | WBP11   | 1051 | 1109 | 4.55386397962 |
| NM_016312 | WBP11   | 1198 | 1259 | 4.55386397962 |
| NM_016312 | WBP11   | 388  | 449  | 5.13865273002 |
| NM_016312 | WBP11   | 1861 | 1952 | 4.55386397207 |
| NM_016312 | WBP11   | 233  | 364  | 5.55386397962 |
| NM_016312 | WBP11   | 656  | 762  | 4.55386397962 |
| NM_016312 | WBP11   | 822  | 894  | 4.55386397962 |
| NM_015957 | APIP    | 182  | 266  | 8.11636992178 |
| NM_015956 | MRPL4   | 858  | 914  | 7.78619612789 |
| NM_015956 | MRPL4   | 989  | 1033 | 8.20124012231 |
| NM_015956 | MRPL4   | 1054 | 1139 | 7.20124035823 |
| NM_015956 | MRPL4   | 480  | 577  | 7.20124035822 |
| NM_015955 | MEM01   | 1343 | 1408 | 5.96514993211 |

|              |         |      |      |               |
|--------------|---------|------|------|---------------|
| NM_015955    | MEMO1   | 823  | 958  | 6.46432664077 |
| NM_015954    | DERA    | 587  | 654  | 5.5221526499  |
| NM_015954    | DERA    | 466  | 529  | 5.60227425911 |
| NM_015954    | DERA    | 967  | 1051 | 5.60629162337 |
| NM_015954    | DERA    | 1162 | 1251 | 5.02132935856 |
| NM_015953    | NOSIP   | 746  | 833  | 6.56465035526 |
| NM_015953    | NOSIP   | 362  | 427  | 7.14576900612 |
| NM_015953    | NOSIP   | 908  | 975  | 7.56482409803 |
| NM_015953    | NOSIP   | 24   | 51   | 5.5608065054  |
| NM_015953    | NOSIP   | 225  | 336  | 7.56482410558 |
| NM_015953    | NOSIP   | 599  | 689  | 6.56465035526 |
| NM_015950    | MRPL2   | 582  | 625  | 5.27603740358 |
| NM_015950    | MRPL2   | 297  | 334  | 6.27202653446 |
| NM_015950    | MRPL2   | 999  | 1069 | 6.85698903518 |
| NM_138455    | CTHRC1  | 939  | 976  | 7.46440885436 |
| NM_138455    | CTHRC1  | 459  | 584  | 9.78651069956 |
| NM_138455    | CTHRC1  | 599  | 876  | 10.7865106996 |
| NM_138455    | CTHRC1  | 379  | 450  | 7.46458260467 |
| NM_138457    | FOXP4   | 1858 | 1960 | 5.3855475193  |
| NM_138457    | FOXP4   | 2012 | 2050 | 5.38538050003 |
| NM_138457    | FOXP4   | 1774 | 1828 | 6.30141504097 |
| NM_138457    | FOXP4   | 1273 | 1335 | 7.38555425035 |
| NM_138457    | FOXP4   | 3436 | 3478 | 5.3855542428  |
| NM_138457    | FOXP4   | 1635 | 1692 | 6.38555425035 |
| NM_138457    | FOXP4   | 438  | 498  | 7.38555425035 |
| NM_138457    | FOXP4   | 2065 | 2126 | 5.3855542428  |
| NM_138457    | FOXP4   | 2899 | 2998 | 6.97051675107 |
| NM_138459    | NUS1    | 2745 | 2820 | 6.08485854539 |
| NM_138459    | NUS1    | 1294 | 1367 | 5.4958784445  |
| NM_138459    | NUS1    | 1539 | 1579 | 4.49989580875 |
| NM_138459    | NUS1    | 3278 | 3322 | 4.4958784445  |
| NM_138459    | NUS1    | 666  | 721  | 5.49972229435 |
| NM_138459    | NUS1    | 296  | 374  | 5.49989603712 |
| NM_138459    | NUS1    | 3516 | 3671 | 6.82182413956 |
| NM_138459    | NUS1    | 760  | 963  | 7.66982104611 |
| NM_138459    | NUS1    | 993  | 1200 | 7.95932766331 |
| NM_138459    | NUS1    | 1677 | 1895 | 7.95932766331 |
| NM_001033002 | RPAIN   | 792  | 879  | 7.37727394198 |
| NM_001033002 | RPAIN   | 1165 | 1245 | 6.79230471021 |
| NM_001199292 | HSD17B4 | 2246 | 2314 | 5.73803204884 |
| NM_001199292 | HSD17B4 | 2495 | 2534 | 4.73802531779 |
| NM_001199292 | HSD17B4 | 647  | 732  | 6.32299454956 |
| NM_001199292 | HSD17B4 | 1206 | 1313 | 5.73803204884 |
| NM_001199292 | HSD17B4 | 1446 | 1505 | 6.90795705028 |
| NM_001199292 | HSD17B4 | 1380 | 1431 | 6.5453869709  |
| NM_001199292 | HSD17B4 | 1876 | 1941 | 4.73803204883 |
| NM_001199292 | HSD17B4 | 1673 | 1723 | 4.73802531779 |
| NM_001199292 | HSD17B4 | 2038 | 2104 | 5.73803204884 |
| NM_001199292 | HSD17B4 | 1505 | 1562 | 6.05996014373 |
| NM_001199292 | HSD17B4 | 2343 | 2446 | 5.32299454956 |

|              |                 |      |      |               |
|--------------|-----------------|------|------|---------------|
| NM_001199292 | HSD17B4         | 1728 | 1835 | 5.32299454956 |
| NM_001199292 | HSD17B4         | 2149 | 2188 | 5.32282079924 |
| NM_001199292 | HSD17B4         | 740  | 932  | 7.05996014373 |
| NM_001199292 | HSD17B4         | 1059 | 1194 | 6.5453869709  |
| NM_001199292 | HSD17B4         | 248  | 437  | 6.05996014373 |
| NM_001199292 | HSD17B4         | 466  | 556  | 4.65389283946 |
| NM_001199290 | PHOSPH02-KLHL23 | 1739 | 1792 | 6.17803434167 |
| NM_001199290 | PHOSPH02-KLHL23 | 820  | 886  | 6.09791273246 |
| NM_001199290 | PHOSPH02-KLHL23 | 3957 | 4013 | 7.18205170592 |
| NM_001199290 | PHOSPH02-KLHL23 | 1323 | 1440 | 8.18205194184 |
| NM_001199290 | PHOSPH02-KLHL23 | 2020 | 2078 | 7.18204521079 |
| NM_001199290 | PHOSPH02-KLHL23 | 556  | 665  | 7.76701444256 |
| NM_001199290 | PHOSPH02-KLHL23 | 694  | 816  | 7.76701420665 |
| NM_178439    | GMCL1           | 1245 | 1294 | 5.86529352221 |
| NM_178439    | GMCL1           | 909  | 972  | 4.86529352221 |
| NM_001080501 | TMEM223         | 341  | 387  | 9.10060212822 |
| NM_001080501 | TMEM223         | 305  | 340  | 8.09658452805 |
| NM_001080501 | TMEM223         | 146  | 254  | 10.1006021282 |
| NM_001080501 | TMEM223         | 480  | 646  | 10.1006021282 |
| NM_001032296 | STK24           | 1102 | 1171 | 4.92645698762 |
| NM_001032296 | STK24           | 1928 | 2023 | 3.11910206556 |
| NM_001032296 | STK24           | 1359 | 1432 | 4.44103016045 |
| NM_001032296 | STK24           | 1500 | 1546 | 3.70406456628 |
| NM_001032296 | STK24           | 2485 | 2692 | 5.70406456628 |
| NM_001032296 | STK24           | 475  | 595  | 5.5785336842  |
| NM_001032296 | STK24           | 2043 | 2209 | 5.5785336842  |
| NM_001032296 | STK24           | 871  | 1083 | 5.44103016045 |
| NM_001032296 | STK24           | 2217 | 2296 | 5.11910206556 |
| NM_001032296 | STK24           | 1206 | 1351 | 5.5785336842  |
| NM_001032296 | STK24           | 606  | 864  | 6.289027067   |
| NM_001032296 | STK24           | 1717 | 1784 | 3.11910205801 |
| NM_001032293 | ZNF207          | 332  | 380  | 4.74160869693 |
| NM_001032293 | ZNF207          | 1600 | 1698 | 7.74160893285 |
| NM_001032293 | ZNF207          | 1281 | 1320 | 4.65746972346 |
| NM_001032293 | ZNF207          | 258  | 312  | 7.32657143357 |
| NM_001032293 | ZNF207          | 405  | 463  | 6.32657143357 |
| NM_001032293 | ZNF207          | 745  | 827  | 6.74160893285 |
| NM_001032293 | ZNF207          | 1490 | 1568 | 6.32657143357 |
| NM_001032293 | ZNF207          | 834  | 929  | 5.74160893285 |
| NM_001032293 | ZNF207          | 27   | 217  | 8.8290717741  |
| NM_001032293 | ZNF207          | 1795 | 1877 | 7.06353702773 |
| NM_001032293 | ZNF207          | 1736 | 1793 | 7.06353702773 |
| NM_001032293 | ZNF207          | 466  | 615  | 8.06353702773 |
| NM_001032293 | ZNF207          | 934  | 1061 | 6.74160893285 |
| NM_001032291 | PSRC1           | 526  | 592  | 5.20984066088 |
| NM_001032291 | PSRC1           | 792  | 857  | 5.20582979176 |
| NM_001032291 | PSRC1           | 1165 | 1231 | 5.20582979176 |
| NM_001032291 | PSRC1           | 105  | 155  | 7.20967364161 |
| NM_001032291 | PSRC1           | 232  | 264  | 6.79079229248 |
| NM_001032291 | PSRC1           | 1384 | 1419 | 5.12570818255 |

|              |         |      |      |               |
|--------------|---------|------|------|---------------|
| NM_001032291 | PSRC1   | 1506 | 1659 | 6.79480989265 |
| NM_199437    | PRDM10  | 5794 | 5832 | 7.89453981694 |
| NM_199437    | PRDM10  | 946  | 1002 | 9.56346777673 |
| NM_199437    | PRDM10  | 5110 | 5169 | 8.97850527601 |
| NM_199437    | PRDM10  | 4125 | 4217 | 9.47950231767 |
| NM_031419    | NFKBIZ  | 2141 | 2195 | 8.49830064883 |
| NM_031419    | NFKBIZ  | 2747 | 2798 | 9.50231824146 |
| NM_031419    | NFKBIZ  | 2925 | 3023 | 9.50231824901 |
| NM_031419    | NFKBIZ  | 2473 | 2527 | 10.5021444987 |
| NM_031419    | NFKBIZ  | 592  | 685  | 8.50231824901 |
| NM_001080533 | UNC119B | 3795 | 3851 | 5.82803821722 |
| NM_001080533 | UNC119B | 2788 | 2847 | 6.82787119795 |
| NM_001080533 | UNC119B | 3037 | 3123 | 5.82787119795 |
| NM_001080533 | UNC119B | 578  | 630  | 7.82804494827 |
| NM_001080533 | UNC119B | 3546 | 3610 | 5.82804494827 |
| NM_001080533 | UNC119B | 2107 | 2166 | 6.8240273481  |
| NM_014256    | B3GNT3  | 2382 | 2432 | 10.2273066011 |
| NM_014256    | B3GNT3  | 1832 | 1872 | 10.2271328507 |
| NM_014256    | B3GNT3  | 1949 | 2041 | 12.549234696  |
| NM_014256    | B3GNT3  | 2203 | 2247 | 11.8082515016 |
| NM_014256    | B3GNT3  | 463  | 524  | 11.2273065935 |
| NM_014256    | B3GNT3  | 599  | 746  | 13.0346615231 |
| NM_014256    | B3GNT3  | 178  | 248  | 11.2273066011 |
| NM_014256    | B3GNT3  | 1638 | 1739 | 12.8122691018 |
| NM_014256    | B3GNT3  | 1231 | 1272 | 10.2273066011 |
| NM_014256    | B3GNT3  | 331  | 453  | 13.2273066011 |
| NM_014256    | B3GNT3  | 121  | 171  | 10.2273065935 |
| NM_014256    | B3GNT3  | 532  | 576  | 10.2232890009 |
| NM_014256    | B3GNT3  | 1891 | 1940 | 12.2232890009 |
| NM_014256    | B3GNT3  | 1329 | 1630 | 14.549234696  |
| NM_014256    | B3GNT3  | 746  | 960  | 13.9277463192 |
| NM_014256    | B3GNT3  | 962  | 1226 | 15.2273066011 |
| NM_020774    | MIB1    | 4726 | 4771 | 6.48403861213 |
| NM_020774    | MIB1    | 5231 | 5285 | 4.98304157048 |
| NM_020774    | MIB1    | 5886 | 5947 | 5.98304157048 |
| NM_020774    | MIB1    | 2761 | 2824 | 7.30514341546 |
| NM_020774    | MIB1    | 2575 | 2618 | 5.89907611141 |
| NM_020774    | MIB1    | 8220 | 8266 | 5.98304157048 |
| NM_020774    | MIB1    | 1476 | 1542 | 6.97919772062 |
| NM_020774    | MIB1    | 2830 | 2880 | 5.97919772062 |
| NM_020774    | MIB1    | 631  | 694  | 4.9832153208  |
| NM_020774    | MIB1    | 5501 | 5622 | 6.56817782152 |
| NM_020774    | MIB1    | 2639 | 2728 | 6.98321532057 |
| NM_020774    | MIB1    | 2956 | 3005 | 4.97919772062 |
| NM_020774    | MIB1    | 4106 | 4192 | 6.98321532057 |
| NM_020774    | MIB1    | 2090 | 2220 | 7.56817782152 |
| NM_020774    | MIB1    | 993  | 1105 | 6.98321532079 |
| NM_024301    | FKRP    | 1362 | 1421 | 10.1791856913 |
| NM_024301    | FKRP    | 2172 | 2234 | 10.7643152113 |
| NM_024301    | FKRP    | 358  | 386  | 9.17534184147 |



|              |           |       |       |                    |
|--------------|-----------|-------|-------|--------------------|
| NM_024301    | FKRP      | 2577  | 2644  | 10.7643152113      |
| NM_017739    | POMGNT1   | 1449  | 1480  | 6.58549987355      |
| NM_017739    | POMGNT1   | 1174  | 1227  | 7.58549987355      |
| NM_017739    | POMGNT1   | 275   | 355   | 7.66946533262      |
| NM_017739    | POMGNT1   | 113   | 245   | 7.66963907539      |
| NM_017739    | POMGNT1   | 1564  | 1682  | 6.66963908294      |
| NM_001080539 | CCDC150   | 3536  | 3608  | 7.40284564895      |
| NM_020772    | NUFIP2    | 8817  | 8881  | 6.9740116773       |
| NM_020772    | NUFIP2    | 7286  | 7311  | 4.65208358219      |
| NM_020772    | NUFIP2    | 3150  | 3187  | 5.65208357487      |
| NM_020772    | NUFIP2    | 6468  | 6528  | 4.65208358219      |
| NM_020772    | NUFIP2    | 8240  | 8284  | 6.23703935208      |
| NM_020772    | NUFIP2    | 2090  | 2125  | 6.23687233282      |
| NM_020772    | NUFIP2    | 10623 | 10691 | 6.65208358219      |
| NM_020772    | NUFIP2    | 1024  | 1114  | 4.65208358242      |
| NM_020772    | NUFIP2    | 7126  | 7170  | 6.23704608313      |
| NM_020772    | NUFIP2    | 4507  | 4588  | 5.65208358242      |
| NM_020772    | NUFIP2    | 7703  | 7757  | 4.64806598224      |
| NM_020772    | NUFIP2    | 1176  | 1234  | 4.65208357487      |
| NM_020772    | NUFIP2    | 4825  | 4900  | 6.23704608314      |
| NM_020772    | NUFIP2    | 2032  | 2076  | 5.56794437303      |
| NM_020772    | NUFIP2    | 5070  | 5129  | 6.65208358241      |
| NM_020772    | NUFIP2    | 4125  | 4220  | 7.65208358242      |
| NM_020772    | NUFIP2    | 7824  | 7888  | 4.65208358242      |
| NM_020772    | NUFIP2    | 702   | 751   | 6.23704607559      |
| NM_020772    | NUFIP2    | 9296  | 9361  | 4.65208357487      |
| NM_020772    | NUFIP2    | 1779  | 1859  | 5.65208358242      |
| NM_020772    | NUFIP2    | 9466  | 9527  | 4.56794437303      |
| NM_020772    | NUFIP2    | 4347  | 4392  | 5.6519098321       |
| NM_020772    | NUFIP2    | 8124  | 8240  | 6.65208358242      |
| NM_020772    | NUFIP2    | 1281  | 1389  | 6.9740116773       |
| NM_020772    | NUFIP2    | 3638  | 3707  | 6.23704608314      |
| NM_020772    | NUFIP2    | 4043  | 4089  | 5.64806598224      |
| NM_020772    | NUFIP2    | 4936  | 5036  | 6.23704608314      |
| NM_020772    | NUFIP2    | 554   | 658   | 6.23704608314      |
| NM_020772    | NUFIP2    | 2576  | 2648  | 6.9740116773       |
| NM_020772    | NUFIP2    | 781   | 835   | 4.56794437303      |
| NM_020772    | NUFIP2    | 3059  | 3148  | 5.65208358242      |
| NM_020772    | NUFIP2    | 8728  | 8806  | 6.23704608314      |
| NM_020772    | NUFIP2    | 448   | 537   | 6.23704584722      |
| NM_020772    | NUFIP2    | 2408  | 2507  | 7.82200858386      |
| NM_020772    | NUFIP2    | 2858  | 3008  | 6.65208358242      |
| NM_020772    | NUFIP2    | 1904  | 2006  | 7.23704608314      |
| NM_020772    | NUFIP2    | 7320  | 7434  | 6.23704608314      |
| NM_020772    | NUFIP2    | 1396  | 1509  | 6.23704608314      |
| NM_020772    | NUFIP2    | 9146  | 9252  | 5.65208358242      |
| NM_020772    | NUFIP2    | 8885  | 8943  | 5.56794437303      |
| NM_020772    | NUFIP2    | 3739  | 3903  | 7.9740116773       |
| NM_020772    | NUFIP2    | 6051  | 6141  | 6.65208357487      |
| NM_199340    | LRRRC37A3 |       | 4843  | 4884 9.40597533121 |

|              |         |      |      |      |                |
|--------------|---------|------|------|------|----------------|
| NM_199340    | LRR37A3 |      | 1968 | 2057 | 9.40213148136  |
| NM_004071    | CLK1    | 1337 | 1388 |      | 1.80713206062  |
| NM_004071    | CLK1    | 1613 | 1681 |      | 3.39209456134  |
| NM_004071    | CLK1    | 526  | 584  |      | 1.80712532957  |
| NM_004071    | CLK1    | 1453 | 1507 |      | 1.80713205307  |
| NM_004071    | CLK1    | 1701 | 1740 |      | 2.80712532957  |
| NM_004071    | CLK1    | 1751 | 1785 |      | 2.72299285124  |
| NM_004071    | CLK1    | 1403 | 1450 |      | 3.72299285124  |
| NM_004071    | CLK1    | 736  | 823  |      | 1.80311446045  |
| NM_004071    | CLK1    | 844  | 1011 |      | 4.12906015551  |
| NM_017734    | PALMD   | 383  | 451  |      | 4.53347413031  |
| NM_001001484 | PTER    | 372  | 417  |      | 7.60831838557  |
| NM_001001484 | PTER    | 1715 | 1759 |      | 6.60831838557  |
| NM_001001484 | PTER    | 1817 | 1856 |      | 8.60831838557  |
| NM_001001484 | PTER    | 1392 | 1487 |      | 7.69245759473  |
| NM_001001486 | ATP2C1  | 119  | 183  |      | 5.34202460343  |
| NM_001001486 | ATP2C1  | 1881 | 2011 |      | 7.14937952549  |
| NM_001001486 | ATP2C1  | 209  | 257  |      | 5.9269803731   |
| NM_001001486 | ATP2C1  | 2457 | 2629 |      | 8.73434202621  |
| NM_001001486 | ATP2C1  | 2045 | 2317 |      | 7.92698710415  |
| NM_001001486 | ATP2C1  | 825  | 957  |      | 6.92698710415  |
| NM_001001486 | ATP2C1  | 1483 | 1696 |      | 8.42948744468  |
| NM_001001486 | ATP2C1  | 994  | 1438 |      | 9.92698710415  |
| NM_001001486 | ATP2C1  | 336  | 403  |      | 5.34202460343  |
| NM_001001486 | ATP2C1  | 468  | 605  |      | 7.14937952549  |
| NM_001001486 | ATP2C1  | 624  | 737  |      | 6.92698710415  |
| NM_001001486 | ATP2C1  | 2318 | 2452 |      | 8.34202460343  |
| NM_001001486 | ATP2C1  | 2710 | 2892 |      | 7.51194960487  |
| NM_001001486 | ATP2C1  | 1697 | 1861 |      | 8.14937952549  |
| NM_017886    | ULK4    | 1562 | 1627 |      | 10.5429949449  |
| NM_001984    | ESD     | 615  | 694  |      | 9.31756066351  |
| NM_001984    | ESD     | 113  | 147  |      | 6.91149335924  |
| NM_001984    | ESD     | 498  | 542  |      | 9.31756066351  |
| NM_001984    | ESD     | 379  | 427  |      | 8.58059506934  |
| NM_001984    | ESD     | 698  | 794  |      | 9.58059506934  |
| NM_001984    | ESD     | 154  | 214  |      | 7.99563256107  |
| NM_001984    | ESD     | 804  | 948  |      | 9.58059506934  |
| NM_021871    | FGA     | 419  | 492  |      | 1.48411727092  |
| NM_021871    | FGA     | 1854 | 1927 |      | -1.10101898012 |
| NM_021871    | FGA     | 1797 | 1851 |      | 0.484117270915 |
| NM_021871    | FGA     | 152  | 284  |      | 2.59959448834  |
| NM_021871    | FGA     | 1928 | 1974 |      | 0.899154534275 |
| NM_021871    | FGA     | 503  | 802  |      | 3.65404227236  |
| NM_021871    | FGA     | 1976 | 2179 |      | 4.14708228364  |
| NM_021871    | FGA     | 8    | 151  |      | 2.8060453658   |
| NM_021871    | FGA     | 1607 | 1795 |      | 2.8060453658   |
| NM_021871    | FGA     | 325  | 404  |      | 0.899154770194 |
| NM_021871    | FGA     | 807  | 1607 |      | 5.54301095997  |
| NM_145808    | MTPN    | 1304 | 1398 |      | 7.47199889937  |
| NM_145808    | MTPN    | 3675 | 3729 |      | 7.15007079694  |

|              |          |      |      |               |               |
|--------------|----------|------|------|---------------|---------------|
| NM_145808    | MTPN     | 2990 | 3039 | 6.15007079694 |               |
| NM_145808    | MTPN     | 2749 | 2788 | 6.0659315951  |               |
| NM_145808    | MTPN     | 2692 | 2749 | 6.73503330521 |               |
| NM_145808    | MTPN     | 3492 | 3539 | 7.47199889937 |               |
| NM_145808    | MTPN     | 2917 | 2972 | 5.15007080426 |               |
| NM_145808    | MTPN     | 3274 | 3337 | 6.15007056857 |               |
| NM_145808    | MTPN     | 472  | 523  | 7.15007080426 |               |
| NM_145808    | MTPN     | 2146 | 2235 | 6.15007080448 |               |
| NM_145808    | MTPN     | 1783 | 1845 | 5.14605320431 |               |
| NM_145808    | MTPN     | 1019 | 1083 | 6.73485955489 |               |
| NM_145808    | MTPN     | 1590 | 1730 | 8.60950242312 |               |
| NM_145808    | MTPN     | 550  | 802  | 8.95742572654 |               |
| NM_145808    | MTPN     | 3364 | 3487 | 6.15007080449 |               |
| NM_145808    | MTPN     | 317  | 428  | 7.15007080449 |               |
| NM_145802    | SEPT6    | 302  | 353  | 5.38271518254 |               |
| NM_001102653 | OTUD4    | 2610 | 2654 | 6.73712299254 |               |
| NM_001102653 | OTUD4    | 2189 | 2244 | 5.7411403568  |               |
| NM_001102653 | OTUD4    | 4478 | 4554 | 5.74113386166 |               |
| NM_001102653 | OTUD4    | 618  | 665  | 5.65700138333 |               |
| NM_001102653 | OTUD4    | 1976 | 2023 | 5.73712299254 |               |
| NM_001102653 | OTUD4    | 1793 | 1825 | 5.65700138333 |               |
| NM_145806    | ZNF511   | 293  | 342  | 4.74974922999 |               |
| NM_145806    | ZNF511   | 633  | 695  | 5.75376659425 |               |
| NM_145806    | ZNF511   | 436  | 507  | 6.75376659425 |               |
| NM_003531    | HIST1H3C |      | 135  | 204           | 11.7800822277 |
| NM_003531    | HIST1H3C |      | 5    | 60            | 9.78007549668 |
| NM_003531    | HIST1H3C |      | 211  | 343           | 12.9500072292 |
| NM_198256    | E2F6     | 1446 | 1487 | 3.57687912125 |               |
| NM_198256    | E2F6     | 2150 | 2242 | 4.66101833063 |               |
| NM_198256    | E2F6     | 979  | 1059 | 3.65700073046 |               |
| NM_001007228 | SPOP     | 2073 | 2144 | 7.89517843801 |               |
| NM_001007228 | SPOP     | 1086 | 1122 | 7.89500469524 |               |
| NM_001007228 | SPOP     | 655  | 715  | 7.47612334611 |               |
| NM_001007228 | SPOP     | 1148 | 1223 | 5.8951717145  |               |
| NM_002913    | RFC1     | 1797 | 1877 | 5.03787528827 |               |
| NM_002913    | RFC1     | 4490 | 4569 | 5.03786855723 |               |
| NM_002913    | RFC1     | 4587 | 4644 | 4.9537360789  |               |
| NM_002913    | RFC1     | 3373 | 3461 | 4.03787528073 |               |
| NM_002913    | RFC1     | 4209 | 4273 | 5.62283755308 |               |
| NM_002913    | RFC1     | 1215 | 1265 | 3.9537360789  |               |
| NM_002913    | RFC1     | 2863 | 2917 | 4.03385768811 |               |
| NM_002913    | RFC1     | 3714 | 3767 | 5.03385768811 |               |
| NM_002913    | RFC1     | 2388 | 2498 | 6.84523021034 |               |
| NM_002913    | RFC1     | 2031 | 2084 | 5.03385768811 |               |
| NM_002913    | RFC1     | 2686 | 2723 | 4.9537360789  |               |
| NM_002913    | RFC1     | 3462 | 3499 | 4.03787528073 |               |
| NM_002913    | RFC1     | 3788 | 3953 | 5.03787528828 |               |
| NM_002913    | RFC1     | 3166 | 3273 | 6.622837789   |               |
| NM_002913    | RFC1     | 2132 | 2240 | 6.03787528828 |               |
| NM_002913    | RFC1     | 2280 | 2372 | 5.03786855723 |               |

|              |           |       |       |                   |
|--------------|-----------|-------|-------|-------------------|
| NM_002913    | RFC1      | 1936  | 2015  | 5.03787528073     |
| NM_002913    | RFC1      | 4345  | 4397  | 5.62283105795     |
| NM_002913    | RFC1      | 2993  | 3158  | 7.622837789       |
| NM_002913    | RFC1      | 1487  | 1610  | 4.03787528828     |
| NM_002912    | REV3L     | 10706 | 10767 | 7.02701468047     |
| NM_002912    | REV3L     | 5925  | 6037  | 9.03103228064     |
| NM_002912    | REV3L     | 10388 | 10459 | 6.94689307126     |
| NM_002912    | REV3L     | 6199  | 6312  | 6.94689307126     |
| NM_002912    | REV3L     | 7346  | 7433  | 8.03103227309     |
| NM_002911    | UPF1      | 4421  | 4489  | 7.14779321148     |
| NM_002911    | UPF1      | 1676  | 1759  | 7.95514813354     |
| NM_002911    | UPF1      | 294   | 342   | 6.14761946116     |
| NM_002911    | UPF1      | 2436  | 2496  | 6.14779321148     |
| NM_002911    | UPF1      | 4525  | 4611  | 6.14779320393     |
| NM_002911    | UPF1      | 4110  | 4157  | 6.14377561131     |
| NM_002911    | UPF1      | 4789  | 4850  | 6.14779321148     |
| NM_002911    | UPF1      | 2872  | 2948  | 6.7327557122      |
| NM_002911    | UPF1      | 2271  | 2325  | 5.14377561131     |
| NM_002911    | UPF1      | 2223  | 2265  | 6.14779321126     |
| NM_002911    | UPF1      | 2376  | 2427  | 5.14778648043     |
| NM_002911    | UPF1      | 3708  | 3770  | 6.14779321148     |
| NM_002911    | UPF1      | 4286  | 4355  | 5.14761946116     |
| NM_002911    | UPF1      | 504   | 763   | 9.14779321148     |
| NM_002911    | UPF1      | 5245  | 5313  | 6.14779321148     |
| NM_002911    | UPF1      | 4957  | 5056  | 6.7327557122      |
| NM_002911    | UPF1      | 1807  | 1843  | 5.14377561131     |
| NM_002911    | UPF1      | 3264  | 3415  | 6.14779321148     |
| NM_002911    | UPF1      | 2508  | 2595  | 6.14779321148     |
| NM_002911    | UPF1      | 1846  | 1915  | 6.14779297556     |
| NM_002911    | UPF1      | 3506  | 3617  | 6.7327557122      |
| NM_002911    | UPF1      | 5165  | 5237  | 6.14779321148     |
| NM_002911    | UPF1      | 56    | 93    | 5.0636540021      |
| NM_002911    | UPF1      | 920   | 1021  | 6.7327557122      |
| NM_002911    | UPF1      | 1069  | 1143  | 6.14779321148     |
| NM_002911    | UPF1      | 350   | 419   | 6.7327557122      |
| NM_002911    | UPF1      | 1955  | 2104  | 7.14779321148     |
| NM_002911    | UPF1      | 2729  | 2871  | 6.7327557122      |
| NM_002911    | UPF1      | 4673  | 4787  | 6.7327557122      |
| NM_002911    | UPF1      | 3924  | 4044  | 7.14779321148     |
| NM_002911    | UPF1      | 3119  | 3236  | 6.14779321148     |
| NM_002911    | UPF1      | 1418  | 1491  | 5.14779320393     |
| NM_002911    | UPF1      | 1499  | 1643  | 8.84823292962     |
| NM_002911    | UPF1      | 763   | 912   | 8.14779321148     |
| NM_002911    | UPF1      | 1152  | 1409  | 9.14779321148     |
| NM_003510    | HIST1H2AK |       | 239   | 293 9.39338387723 |
| NM_002917    | RFNG      | 931   | 986   | 8.43466374283     |
| NM_002917    | RFNG      | 344   | 433   | 7.84969474697     |
| NM_002915    | RFC3      | 573   | 641   | 6.90660263577     |
| NM_002915    | RFC3      | 1691  | 1777  | 5.90259176665     |
| NM_001166357 | SHMT2     | 1962  | 2051  | 6.42241975218     |

|              |          |       |       |               |               |
|--------------|----------|-------|-------|---------------|---------------|
| NM_001166357 | SHMT2    | 1562  | 1738  | 6.57442284563 |               |
| NM_001166357 | SHMT2    | 1293  | 1376  | 5.25249475074 |               |
| NM_001166357 | SHMT2    | 1419  | 1551  | 4.25249475074 |               |
| NM_001166357 | SHMT2    | 699   | 945   | 7.15938534635 |               |
| NM_001166357 | SHMT2    | 1764  | 1846  | 6.0598496728  |               |
| NM_001166357 | SHMT2    | 947   | 1024  | 3.25232100042 |               |
| NM_001166357 | SHMT2    | 1057  | 1234  | 6.83745725146 |               |
| NM_001166357 | SHMT2    | 303   | 674   | 7.25249475074 |               |
| NM_014774    | KIAA0494 |       | 1168  | 1215          | 7.40997236223 |
| NM_014774    | KIAA0494 |       | 453   | 508           | 7.99476112018 |
| NM_014774    | KIAA0494 |       | 1626  | 1667          | 6.3258331604  |
| NM_014774    | KIAA0494 |       | 1845  | 1903          | 7.3258331604  |
| NM_014774    | KIAA0494 |       | 2936  | 3020          | 7.99493463458 |
| NM_014774    | KIAA0494 |       | 585   | 664           | 8.40997236978 |
| NM_014774    | KIAA0494 |       | 2291  | 2436          | 8.40997236978 |
| NM_014777    | URB2     | 473   | 549   | 9.34893458285 |               |
| NM_014777    | URB2     | 1183  | 1238  | 10.3489345829 |               |
| NM_014777    | URB2     | 1344  | 1427  | 9.35295218302 |               |
| NM_014777    | URB2     | 2020  | 2072  | 9.93790795269 |               |
| NM_014777    | URB2     | 2927  | 2989  | 10.6748802779 |               |
| NM_014777    | URB2     | 1730  | 1775  | 8.34893458285 |               |
| NM_014777    | URB2     | 3855  | 3930  | 10.6748802779 |               |
| NM_014777    | URB2     | 2994  | 3040  | 8.34893458285 |               |
| NM_014777    | URB2     | 569   | 639   | 9.34893458285 |               |
| NM_014777    | URB2     | 4180  | 4266  | 9.35295218302 |               |
| NM_014777    | URB2     | 4919  | 5020  | 10.6748802779 |               |
| NM_014777    | URB2     | 2815  | 2883  | 8.35295218303 |               |
| NM_014777    | URB2     | 2102  | 2239  | 10.9379146837 |               |
| NM_014771    | RNF40    | 4322  | 4378  | 5.72695451972 |               |
| NM_014771    | RNF40    | 2737  | 2789  | 4.05785954067 |               |
| NM_014771    | RNF40    | 2273  | 2317  | 5.14182499974 |               |
| NM_014771    | RNF40    | 1997  | 2036  | 4.13798114988 |               |
| NM_014771    | RNF40    | 997   | 1049  | 5.14199874983 |               |
| NM_014771    | RNF40    | 4540  | 4598  | 4.141992019   |               |
| NM_014771    | RNF40    | 2970  | 3053  | 4.14199874251 |               |
| NM_014772    | CTIF     | 5060  | 5101  | 6.2418202456  |               |
| NM_005245    | FAT1     | 6834  | 6879  | 5.90324868211 |               |
| NM_005245    | FAT1     | 3633  | 3730  | 7.71060360417 |               |
| NM_005245    | FAT1     | 569   | 646   | 7.71060360417 |               |
| NM_005245    | FAT1     | 2155  | 2185  | 4.81910947273 |               |
| NM_005245    | FAT1     | 10547 | 10605 | 5.90324868211 |               |
| NM_005245    | FAT1     | 14464 | 14556 | 6.90324868211 |               |
| NM_005245    | FAT1     | 2896  | 2956  | 4.90324868189 |               |
| NM_005245    | FAT1     | 13503 | 13559 | 7.225176777   |               |
| NM_005245    | FAT1     | 3927  | 4007  | 6.48821118261 |               |
| NM_005245    | FAT1     | 3737  | 3869  | 8.07317368356 |               |
| NM_005245    | FAT1     | 10307 | 10357 | 5.90324868211 |               |
| NM_005245    | FAT1     | 2188  | 2254  | 6.48821118283 |               |
| NM_005245    | FAT1     | 10394 | 10447 | 6.90324195106 |               |
| NM_005245    | FAT1     | 6750  | 6823  | 4.9030749318  |               |

|           |      |       |       |               |
|-----------|------|-------|-------|---------------|
| NM_005245 | FAT1 | 14249 | 14303 | 4.90324844619 |
| NM_005245 | FAT1 | 10858 | 10997 | 8.60368840025 |
| NM_005245 | FAT1 | 10450 | 10492 | 6.48821117529 |
| NM_005245 | FAT1 | 4122  | 4182  | 6.48821118283 |
| NM_005245 | FAT1 | 14004 | 14029 | 4.89923108194 |
| NM_005245 | FAT1 | 3393  | 3626  | 9.54710487189 |
| NM_005245 | FAT1 | 196   | 369   | 9.15117619556 |
| NM_005245 | FAT1 | 2656  | 2694  | 5.90324867456 |
| NM_005245 | FAT1 | 12945 | 13267 | 9.07317368356 |
| NM_005245 | FAT1 | 14333 | 14417 | 7.225176777   |
| NM_005245 | FAT1 | 7266  | 7616  | 10.0325316991 |
| NM_005245 | FAT1 | 5527  | 5835  | 9.99071152336 |
| NM_005245 | FAT1 | 13924 | 13997 | 7.225176777   |
| NM_005245 | FAT1 | 8904  | 9051  | 7.90324868211 |
| NM_005245 | FAT1 | 13579 | 13616 | 4.89923108194 |
| NM_005245 | FAT1 | 384   | 525   | 8.36268030075 |
| NM_005245 | FAT1 | 6885  | 7260  | 10.4882111828 |
| NM_005245 | FAT1 | 7971  | 8152  | 8.60368840025 |
| NM_005245 | FAT1 | 14047 | 14228 | 8.99071152336 |
| NM_005245 | FAT1 | 2964  | 3212  | 8.71060360417 |
| NM_005245 | FAT1 | 5272  | 5523  | 9.81013927772 |
| NM_005245 | FAT1 | 1898  | 2127  | 9.225176777   |
| NM_005245 | FAT1 | 10616 | 10738 | 7.71060360417 |
| NM_005245 | FAT1 | 11046 | 11072 | 5.90324844619 |
| NM_005245 | FAT1 | 9051  | 9629  | 10.2608006867 |
| NM_005245 | FAT1 | 2715  | 2890  | 8.07317368356 |
| NM_005245 | FAT1 | 4520  | 4870  | 10.6581361843 |
| NM_005245 | FAT1 | 9634  | 10183 | 11.0117731389 |
| NM_005245 | FAT1 | 8159  | 8583  | 10.5179585262 |
| NM_005245 | FAT1 | 664   | 1046  | 9.90324868211 |
| NM_005245 | FAT1 | 4015  | 4121  | 6.90324868211 |
| NM_005245 | FAT1 | 13621 | 13905 | 9.54710487189 |
| NM_005245 | FAT1 | 5876  | 6031  | 8.81013927772 |
| NM_005245 | FAT1 | 6031  | 6478  | 10.1127020477 |
| NM_005245 | FAT1 | 1054  | 1313  | 9.71060360417 |
| NM_005245 | FAT1 | 7668  | 7961  | 9.60368840025 |
| NM_005245 | FAT1 | 1590  | 1665  | 7.71060360417 |
| NM_005245 | FAT1 | 1318  | 1385  | 6.48821118261 |
| NM_005245 | FAT1 | 13268 | 13502 | 9.42681063817 |
| NM_005245 | FAT1 | 12371 | 12882 | 10.6311691367 |
| NM_005245 | FAT1 | 4891  | 5257  | 10.5471048719 |
| NM_005245 | FAT1 | 14562 | 14698 | 7.225176777   |
| NM_005245 | FAT1 | 6478  | 6729  | 9.225176777   |
| NM_005245 | FAT1 | 11933 | 12358 | 9.81013927772 |
| NM_005245 | FAT1 | 1387  | 1542  | 6.90324868211 |
| NM_005245 | FAT1 | 8594  | 8831  | 9.65813618428 |
| NM_005245 | FAT1 | 2274  | 2643  | 10.4268106382 |
| NM_005245 | FAT1 | 3237  | 3378  | 8.225176777   |
| NM_005245 | FAT1 | 1698  | 1895  | 9.29556610489 |
| NM_005245 | FAT1 | 10773 | 10840 | 6.48821094692 |

|              |              |       |       |                   |
|--------------|--------------|-------|-------|-------------------|
| NM_005245    | FAT1         | 11077 | 11931 | 11.4882111828     |
| NM_005245    | FAT1         | 4187  | 4501  | 9.76122967724     |
| NM_005242    | F2RL1        | 509   | 566   | 11.2054965074     |
| NM_005242    | F2RL1        | 342   | 415   | 11.6205407376     |
| NM_005242    | F2RL1        | 650   | 706   | 10.6165231376     |
| NM_005242    | F2RL1        | 971   | 1012  | 10.6165231376     |
| NM_005242    | F2RL1        | 1135  | 1204  | 10.6205407302     |
| NM_005242    | F2RL1        | 1334  | 1454  | 11.6205407378     |
| NM_005242    | F2RL1        | 1033  | 1129  | 11.6205407378     |
| NM_005242    | F2RL1        | 806   | 887   | 10.6205340067     |
| NM_005242    | F2RL1        | 1722  | 1798  | 10.6205407302     |
| NM_014779    | TSC22D2      | 2226  | 2270  | 7.00393489148     |
| NM_014779    | TSC22D2      | 3014  | 3055  | 7.00009104162     |
| NM_014779    | TSC22D2      | 216   | 322   | 7.58906441146     |
| NM_032144    | RAB6C        | 2571  | 2630  | 8.35609613032     |
| NM_032142    | CEP192       | 7658  | 7713  | 7.89280180796     |
| NM_032142    | CEP192       | 2397  | 2482  | 7.89664565781     |
| NM_032142    | CEP192       | 5467  | 5578  | 7.89664565781     |
| NM_032141    | NSRP1        | 13    | 71    | 5.12549856413     |
| NM_032492    | JAGN1        | 422   | 517   | 8.81419321402     |
| NM_032492    | JAGN1        | 248   | 323   | 8.81419321402     |
| NM_032148    | SLC41A2      | 2702  | 2751  | 9.93872531449     |
| NM_032148    | SLC41A2      | 356   | 415   | 10.8586037053     |
| NM_032148    | SLC41A2      | 89    | 172   | 11.9427429071     |
| NM_032148    | SLC41A2      | 2627  | 2664  | 9.85860370528     |
| NM_032148    | SLC41A2      | 1382  | 1412  | 10.8586037053     |
| NM_032148    | SLC41A2      | 1842  | 1908  | 10.9427429147     |
| NM_032148    | SLC41A2      | 1661  | 1755  | 12.7500978367     |
| NM_032148    | SLC41A2      | 1982  | 2021  | 9.93872531449     |
| NM_032148    | SLC41A2      | 913   | 1024  | 11.5277054154     |
| NM_032148    | SLC41A2      | 569   | 636   | 11.5276986843     |
| NM_032148    | SLC41A2      | 1065  | 1176  | 12.5277054154     |
| NM_001123385 | BCOR         | 559   | 608   | 5.77374914494     |
| NM_001123385 | BCOR         | 2287  | 2338  | 6.85387075415     |
| NM_001123385 | BCOR         | 5152  | 5261  | 6.85788835431     |
| NM_001123385 | BCOR         | 2631  | 2721  | 6.85788162327     |
| NM_001204173 | C8orf44-SGK3 |       | 551   | 603 8.55021830215 |
| NM_152231    | FBX034       | 1465  | 1512  | 9.10172855776     |
| NM_152231    | FBX034       | 430   | 490   | 8.51676629274     |
| NM_152231    | FBX034       | 2365  | 2437  | 8.51676605704     |
| NM_152231    | FBX034       | 1686  | 1749  | 8.5167595619      |
| NM_152231    | FBX034       | 1318  | 1414  | 9.10172879368     |
| NM_152231    | FBX034       | 840   | 900   | 9.5167595619      |
| NM_152233    | SNX6         | 1769  | 1863  | 3.00616199815     |
| NM_152233    | SNX6         | 1533  | 1600  | 4.6752569772      |
| NM_152233    | SNX6         | 632   | 745   | 4.67526370825     |
| NM_002669    | PLRG1        | 987   | 1043  | 5.92306488449     |
| NM_002669    | PLRG1        | 614   | 661   | 5.34211325289     |
| NM_002669    | PLRG1        | 1499  | 1550  | 5.92306488449     |
| NM_002669    | PLRG1        | 1727  | 1778  | 4.33810238377     |

|              |       |      |      |               |
|--------------|-------|------|------|---------------|
| NM_002669    | PLRG1 | 1239 | 1298 | 4.34194623363 |
| NM_002669    | PLRG1 | 1045 | 1108 | 5.92708224875 |
| NM_002669    | PLRG1 | 1384 | 1475 | 5.92708248467 |
| NM_002669    | PLRG1 | 68   | 152  | 5.34211325289 |
| NM_002669    | PLRG1 | 339  | 409  | 4.34194623363 |
| NM_002669    | PLRG1 | 725  | 832  | 6.66404807883 |
| NM_001987    | ETV6  | 1926 | 2022 | 9.15031765193 |
| NM_002661    | PLCG2 | 7939 | 8181 | 15.6863918303 |
| NM_001127889 | SPG21 | 173  | 256  | 9.32320229599 |
| NM_001127889 | SPG21 | 361  | 413  | 7.00127396518 |
| NM_001127889 | SPG21 | 1320 | 1394 | 8.58623670182 |
| NM_001127889 | SPG21 | 1399 | 1464 | 8.58622997077 |
| NM_001127889 | SPG21 | 611  | 701  | 9.32320229599 |
| NM_001127889 | SPG21 | 311  | 355  | 8.00110045078 |
| NM_001127889 | SPG21 | 500  | 595  | 9.32320229599 |
| NM_001127889 | SPG21 | 702  | 826  | 10.0012742011 |
| NM_001127889 | SPG21 | 1116 | 1314 | 10.1711992025 |
| NM_013449    | BAZ2A | 1012 | 1103 | 5.63400776521 |
| NM_013449    | BAZ2A | 2727 | 2825 | 6.63400776521 |
| NM_013449    | BAZ2A | 7686 | 7730 | 4.63383401489 |
| NM_013449    | BAZ2A | 1270 | 1377 | 6.21897026593 |
| NM_013449    | BAZ2A | 4809 | 4864 | 5.63383401489 |
| NM_013449    | BAZ2A | 2870 | 2933 | 5.63383401489 |
| NM_013449    | BAZ2A | 6286 | 6357 | 4.63400776521 |
| NM_013449    | BAZ2A | 607  | 653  | 4.63400752929 |
| NM_013449    | BAZ2A | 6506 | 6556 | 4.62999016503 |
| NM_013449    | BAZ2A | 7820 | 7896 | 6.63400776521 |
| NM_013449    | BAZ2A | 6948 | 6989 | 5.63383401489 |
| NM_013449    | BAZ2A | 3492 | 3569 | 4.63400103415 |
| NM_013449    | BAZ2A | 6107 | 6156 | 4.62999016503 |
| NM_013449    | BAZ2A | 7090 | 7195 | 6.95593586009 |
| NM_013449    | BAZ2A | 1396 | 1447 | 4.62999016503 |
| NM_013449    | BAZ2A | 337  | 389  | 6.21897026593 |
| NM_013449    | BAZ2A | 1722 | 1812 | 7.21897026593 |
| NM_013449    | BAZ2A | 4269 | 4320 | 5.63400103415 |
| NM_013449    | BAZ2A | 1522 | 1617 | 6.95593586009 |
| NM_013449    | BAZ2A | 2107 | 2169 | 4.54986855582 |
| NM_013449    | BAZ2A | 863  | 985  | 7.21897026593 |
| NM_013449    | BAZ2A | 2938 | 3019 | 5.63400775766 |
| NM_013449    | BAZ2A | 5218 | 5297 | 6.21897026593 |
| NM_013449    | BAZ2A | 6592 | 6661 | 4.62999016503 |
| NM_013449    | BAZ2A | 4492 | 4554 | 4.63400103415 |
| NM_013449    | BAZ2A | 674  | 771  | 6.21897026593 |
| NM_013449    | BAZ2A | 8157 | 8216 | 5.63383401489 |
| NM_013449    | BAZ2A | 389  | 531  | 6.95593586009 |
| NM_013449    | BAZ2A | 3149 | 3241 | 7.21897026593 |
| NM_013449    | BAZ2A | 4934 | 5066 | 6.63400776521 |
| NM_013446    | MKRN1 | 1334 | 1375 | 5.75078228839 |
| NM_013446    | MKRN1 | 923  | 974  | 6.48774787501 |
| NM_013446    | MKRN1 | 609  | 675  | 5.16581978745 |



|              |        |      |      |               |
|--------------|--------|------|------|---------------|
| NM_013446    | MKRN1  | 1166 | 1242 | 5.1618021875  |
| NM_013446    | MKRN1  | 1446 | 1521 | 4.16581978767 |
| NM_013446    | MKRN1  | 1051 | 1095 | 6.16581978767 |
| NM_013446    | MKRN1  | 676  | 750  | 4.16581978767 |
| NM_013446    | MKRN1  | 2940 | 2985 | 4.16564603735 |
| NM_013446    | MKRN1  | 412  | 552  | 5.75078228839 |
| NM_013446    | MKRN1  | 1599 | 1715 | 6.16581978767 |
| NM_013444    | UBQLN2 | 3160 | 3218 | 8.44893867878 |
| NM_013442    | STOML2 | 251  | 301  | 4.68018143225 |
| NM_013442    | STOML2 | 904  | 994  | 4.68018143225 |
| NM_013442    | STOML2 | 438  | 491  | 5.6801814247  |
| NM_013442    | STOML2 | 1253 | 1313 | 3.67616383207 |
| NM_013442    | STOML2 | 302  | 435  | 6.68018143225 |
| NM_013442    | STOML2 | 153  | 226  | 4.6801814247  |
| NM_013442    | STOML2 | 499  | 658  | 6.85010643369 |
| NM_013441    | RCAN3  | 1836 | 1885 | 6.2703725903  |
| NM_001097642 | GJB1   | 1264 | 1322 | 5.5724627773  |
| NM_001097642 | GJB1   | 168  | 235  | 5.25053468241 |
| NM_001097642 | GJB1   | 893  | 962  | 4.25053467486 |
| NM_001097642 | GJB1   | 27   | 140  | 6.25053468241 |
| NM_001097642 | GJB1   | 1045 | 1085 | 4.24651708224 |
| NM_001097642 | GJB1   | 771  | 876  | 4.25053468241 |
| NM_001097642 | GJB1   | 578  | 698  | 6.83549718313 |
| NM_001097642 | GJB1   | 241  | 344  | 5.25053468241 |
| NM_001097642 | GJB1   | 477  | 577  | 6.42045968385 |
| NM_015135    | NUP205 | 4310 | 4358 | 7.69083081878 |
| NM_015135    | NUP205 | 5550 | 5620 | 8.42779641294 |
| NM_015135    | NUP205 | 6165 | 6237 | 9.10586831806 |
| NM_015135    | NUP205 | 261  | 309  | 7.69083081123 |
| NM_015135    | NUP205 | 2415 | 2533 | 8.10586831806 |
| NM_015135    | NUP205 | 1495 | 1555 | 7.69083081877 |
| NM_015135    | NUP205 | 1808 | 1843 | 7.10185071788 |
| NM_015135    | NUP205 | 4724 | 4789 | 8.10586831806 |
| NM_015135    | NUP205 | 152  | 191  | 7.105861587   |
| NM_015135    | NUP205 | 2744 | 2814 | 8.69083081123 |
| NM_015135    | NUP205 | 3229 | 3299 | 8.91322324011 |
| NM_015135    | NUP205 | 330  | 376  | 8.9132230042  |
| NM_015135    | NUP205 | 5653 | 5719 | 7.10569456774 |
| NM_015135    | NUP205 | 1684 | 1764 | 8.10586831806 |
| NM_015135    | NUP205 | 391  | 527  | 9.42779641294 |
| NM_015135    | NUP205 | 945  | 1046 | 8.69083081878 |
| NM_015135    | NUP205 | 535  | 670  | 8.91322324011 |
| NM_015135    | NUP205 | 25   | 139  | 8.69083081878 |
| NM_015135    | NUP205 | 3931 | 4124 | 9.2757933195  |
| NM_015135    | NUP205 | 4199 | 4305 | 8.91322324011 |
| NM_015135    | NUP205 | 4862 | 4910 | 7.02172910867 |
| NM_015135    | NUP205 | 1051 | 1198 | 8.91322324011 |
| NM_015135    | NUP205 | 1853 | 1989 | 7.69083081878 |
| NM_015135    | NUP205 | 5346 | 5438 | 8.42779641294 |
| NM_015135    | NUP205 | 3723 | 3814 | 7.69083081878 |

|              |          |      |      |                   |
|--------------|----------|------|------|-------------------|
| NM_015135    | NUP205   | 5988 | 6114 | 9.10586831806     |
| NM_015135    | NUP205   | 5797 | 5903 | 8.91322324011     |
| NM_015135    | NUP205   | 2852 | 3184 | 10.3537958315     |
| NM_015135    | NUP205   | 4439 | 4693 | 10.6294302741     |
| NM_015135    | NUP205   | 4960 | 5066 | 8.69083081878     |
| NM_015135    | NUP205   | 2546 | 2663 | 7.69083081878     |
| NM_015135    | NUP205   | 887  | 941  | 7.69065706846     |
| NM_015135    | NUP205   | 2326 | 2412 | 9.10586831806     |
| NM_015135    | NUP205   | 3819 | 3931 | 8.69083081878     |
| NM_015135    | NUP205   | 5070 | 5303 | 10.3537958315     |
| NM_015135    | NUP205   | 1325 | 1488 | 9.42779641294     |
| NM_015135    | NUP205   | 3303 | 3472 | 9.2757933195      |
| NM_015135    | NUP205   | 1559 | 1660 | 7.69083081878     |
| NM_015135    | NUP205   | 738  | 872  | 7.69083081878     |
| NM_015135    | NUP205   | 1999 | 2302 | 10.1058683181     |
| NM_015135    | NUP205   | 3495 | 3717 | 10.2757933195     |
| NM_015137    | EFR3A    | 4471 | 4509 | 5.49977031466     |
| NM_015423    | AASDHPPT |      | 622  | 663 3.33041047137 |
| NM_015130    | TBC1D9   | 704  | 751  | 8.54512885492     |
| NM_015130    | TBC1D9   | 3276 | 3326 | 8.1302583749      |
| NM_015130    | TBC1D9   | 411  | 462  | 7.46116339585     |
| NM_015130    | TBC1D9   | 5053 | 5125 | 6.54529587418     |
| NM_015130    | TBC1D9   | 2891 | 2967 | 6.54530236932     |
| NM_015130    | TBC1D9   | 560  | 596  | 6.46116339585     |
| NM_015130    | TBC1D9   | 4117 | 4187 | 8.54530236932     |
| NM_015130    | TBC1D9   | 2567 | 2665 | 8.13026510596     |
| NM_015130    | TBC1D9   | 5160 | 5318 | 8.13026510596     |
| NM_015421    | TMEM186  | 383  | 418  | 7.84879036913     |
| NM_015421    | TMEM186  | 590  | 655  | 6.92891197834     |
| NM_015132    | SNX13    | 2447 | 2508 | 6.85375350519     |
| NM_015132    | SNX13    | 468  | 533  | 6.93789247866     |
| NM_015132    | SNX13    | 677  | 724  | 7.93788598352     |
| NM_015132    | SNX13    | 3122 | 3180 | 6.93789270703     |
| NM_015132    | SNX13    | 2733 | 2803 | 5.93789271435     |
| NM_015132    | SNX13    | 3467 | 3613 | 8.74524763663     |
| NM_015132    | SNX13    | 1241 | 1341 | 6.93789270703     |
| NM_015132    | SNX13    | 2671 | 2724 | 7.9338751144      |
| NM_001142864 | PIEZ01   | 7516 | 7584 | 8.42348407111     |
| NM_001142864 | PIEZ01   | 3540 | 3595 | 8.42348407111     |
| NM_001142864 | PIEZ01   | 5908 | 5963 | 8.42348407089     |
| NM_001142864 | PIEZ01   | 65   | 140  | 10.2308389932     |
| NM_001142864 | PIEZ01   | 217  | 274  | 9.00844657183     |
| NM_001142864 | PIEZ01   | 7386 | 7491 | 10.2308389932     |
| NM_001142864 | PIEZ01   | 4908 | 4962 | 8.42348406356     |
| NM_001142864 | PIEZ01   | 1522 | 1625 | 9.745412166       |
| NM_001142864 | PIEZ01   | 3958 | 4010 | 7.42331032079     |
| NM_001142864 | PIEZ01   | 4504 | 4552 | 8.42348406356     |
| NM_001142864 | PIEZ01   | 3850 | 3880 | 8.42347734005     |
| NM_001142864 | PIEZ01   | 6298 | 6390 | 10.2308389932     |
| NM_001142864 | PIEZ01   | 0    | 62   | 7.41946647093     |

|              |        |      |      |               |
|--------------|--------|------|------|---------------|
| NM_001142864 | PIEZ01 | 450  | 529  | 8.42348407111 |
| NM_001142864 | PIEZ01 | 952  | 999  | 7.41946647093 |
| NM_001142864 | PIEZ01 | 3600 | 3710 | 10.2308389932 |
| NM_001142864 | PIEZ01 | 2365 | 2547 | 10.2308389932 |
| NM_001142864 | PIEZ01 | 837  | 941  | 9.42348407111 |
| NM_001142864 | PIEZ01 | 2895 | 3069 | 11.5934090726 |
| NM_001142864 | PIEZ01 | 636  | 768  | 9.745412166   |
| NM_001142864 | PIEZ01 | 7311 | 7348 | 7.33934486172 |
| NM_001142864 | PIEZ01 | 7206 | 7296 | 8.42348407111 |
| NM_001142864 | PIEZ01 | 5095 | 5174 | 9.00844657183 |
| NM_001142864 | PIEZ01 | 3098 | 3319 | 10.4234840711 |
| NM_001142864 | PIEZ01 | 1033 | 1181 | 9.42348407111 |
| NM_001142864 | PIEZ01 | 3788 | 3849 | 9.00844657161 |
| NM_001142864 | PIEZ01 | 4234 | 4315 | 9.00844657183 |
| NM_001142864 | PIEZ01 | 6444 | 6610 | 7.42348407111 |
| NM_001142864 | PIEZ01 | 6127 | 6248 | 9.00844657183 |
| NM_001142864 | PIEZ01 | 1644 | 1901 | 11.6714115846 |
| NM_001142864 | PIEZ01 | 1242 | 1486 | 11.9470460272 |
| NM_001142864 | PIEZ01 | 2548 | 2698 | 10.0084465718 |
| NM_001142864 | PIEZ01 | 5324 | 5497 | 9.00844657183 |
| NM_001142864 | PIEZ01 | 6754 | 6831 | 8.42348406356 |
| NM_001142864 | PIEZ01 | 1913 | 2101 | 10.8829156897 |
| NM_001142864 | PIEZ01 | 299  | 444  | 10.4234840711 |
| NM_001142864 | PIEZ01 | 5026 | 5082 | 8.42348406356 |
| NM_015138    | RTF1   | 4036 | 4078 | 5.20408992202 |
| NM_015138    | RTF1   | 3191 | 3265 | 6.87318490107 |
| NM_015138    | RTF1   | 2738 | 2803 | 6.20408992202 |
| NM_015138    | RTF1   | 2202 | 2266 | 6.28822240035 |
| NM_052972    | LRG1   | 1050 | 1154 | 8.62462523022 |
| NM_052972    | LRG1   | 769  | 1033 | 11.3615908244 |
| NM_052972    | LRG1   | 465  | 748  | 12.0840568489 |
| NM_052972    | LRG1   | 1437 | 1744 | 11.9938590399 |
| NM_052972    | LRG1   | 11   | 464  | 11.1271255707 |
| NM_052972    | LRG1   | 1251 | 1421 | 9.36159082438 |
| NM_001190716 | DNM2   | 3561 | 3643 | 5.6701640019  |
| NM_001190716 | DNM2   | 610  | 690  | 6.25511977157 |
| NM_001190716 | DNM2   | 228  | 278  | 4.66999025158 |
| NM_001190716 | DNM2   | 358  | 419  | 5.67016400189 |
| NM_001190716 | DNM2   | 698  | 760  | 4.6701640019  |
| NM_001190716 | DNM2   | 552  | 608  | 6.99209209679 |
| NM_001190716 | DNM2   | 458  | 525  | 5.67016376598 |
| NM_001190716 | DNM2   | 2155 | 2181 | 5.58602479252 |
| NM_001190716 | DNM2   | 1181 | 1263 | 4.67016400189 |
| NM_001190716 | DNM2   | 899  | 960  | 6.25512650262 |
| NM_001190716 | DNM2   | 1431 | 1497 | 5.67015727085 |
| NM_001190716 | DNM2   | 2613 | 2712 | 4.6701640019  |
| NM_001190716 | DNM2   | 2385 | 2449 | 4.67015727085 |
| NM_001190716 | DNM2   | 761  | 880  | 6.25512650262 |
| NM_001190716 | DNM2   | 1304 | 1423 | 7.47751892396 |
| NM_001190716 | DNM2   | 2955 | 3001 | 4.67015727085 |

|              |          |      |      |                    |
|--------------|----------|------|------|--------------------|
| NM_001190716 | DNM2     | 2241 | 2355 | 5.6701640019       |
| NM_001190716 | DNM2     | 1742 | 2073 | 8.12959562054      |
| NM_014175    | MRPL15   | 683  | 745  | 8.1433761519       |
| NM_014175    | MRPL15   | 804  | 855  | 6.55841364364      |
| NM_014175    | MRPL15   | 589  | 651  | 8.55823990087      |
| NM_014175    | MRPL15   | 300  | 335  | 7.55439605102      |
| NM_014175    | MRPL15   | 939  | 1020 | 8.1433761519       |
| NM_033452    | TRIM47   | 1348 | 1391 | 8.44989511473      |
| NM_033452    | TRIM47   | 1949 | 2008 | 8.44989512228      |
| NM_033452    | TRIM47   | 1654 | 1727 | 10.034857623       |
| NM_033452    | TRIM47   | 98   | 139  | 10.4498951221      |
| NM_033452    | TRIM47   | 1299 | 1346 | 8.44972137196      |
| NM_033452    | TRIM47   | 1881 | 1946 | 9.44988839123      |
| NM_033452    | TRIM47   | 1472 | 1525 | 9.44989488636      |
| NM_033452    | TRIM47   | 1805 | 1864 | 8.44587752211      |
| NM_033453    | ITPA     | 213  | 327  | 6.70546418639      |
| NM_033453    | ITPA     | 390  | 443  | 7.28640908693      |
| NM_033453    | ITPA     | 471  | 559  | 7.70546418639      |
| NM_033453    | ITPA     | 894  | 1027 | 7.70546418639      |
| NM_033453    | ITPA     | 580  | 713  | 7.70546418639      |
| NM_014172    | PHPT1    | 637  | 677  | 3.92583376949      |
| NM_014172    | PHPT1    | 961  | 1005 | 1.92583376949      |
| NM_014172    | PHPT1    | 855  | 889  | 1.84186831042      |
| NM_014172    | PHPT1    | 721  | 847  | 4.24793561469      |
| NM_001080394 | KIAA0146 |      | 1609 | 1665 6.93495419497 |
| NM_001080394 | KIAA0146 |      | 1152 | 1176 5.34999169425 |
| NM_001080394 | KIAA0146 |      | 452  | 543 6.43412417258  |
| NM_006634    | VAMP5    | 326  | 369  | 8.0923813855       |
| NM_006634    | VAMP5    | 143  | 184  | 8.00824241203      |
| NM_006571    | DCTN6    | 287  | 359  | 5.69823104078      |
| NM_006571    | DCTN6    | 130  | 203  | 5.69823104078      |
| NM_006571    | DCTN6    | 621  | 679  | 3.69823080486      |
| NM_015094    | HIC2     | 2334 | 2411 | 7.72257783839      |
| NM_032290    | ANKRD32  | 2141 | 2184 | 7.97703277401      |
| NM_145810    | CDCA7    | 2028 | 2131 | 7.09414710609      |
| NM_145810    | CDCA7    | 738  | 794  | 5.50901085505      |
| NM_145810    | CDCA7    | 2154 | 2259 | 6.50918436945      |
| NM_145810    | CDCA7    | 1131 | 1156 | 5.50516700519      |
| NM_145810    | CDCA7    | 229  | 265  | 6.50516700519      |
| NM_145810    | CDCA7    | 1920 | 1989 | 5.50901085505      |
| NM_145810    | CDCA7    | 413  | 488  | 7.09414687017      |
| NM_145810    | CDCA7    | 862  | 941  | 6.50516700519      |
| NM_006577    | B3GNT2   | 2361 | 2444 | 4.38032491674      |
| NM_006577    | B3GNT2   | 1073 | 1110 | 5.384342281        |
| NM_006577    | B3GNT2   | 208  | 277  | 6.38434251692      |
| NM_006577    | B3GNT2   | 2541 | 2622 | 6.70626388075      |
| NM_006577    | B3GNT2   | 1349 | 1422 | 5.38433578586      |
| NM_006577    | B3GNT2   | 993  | 1060 | 5.38434251692      |
| NM_006577    | B3GNT2   | 393  | 444  | 4.30020330753      |
| NM_006577    | B3GNT2   | 1184 | 1306 | 5.96930501764      |

|           |         |      |      |               |
|-----------|---------|------|------|---------------|
| NM_014171 | CRIPT   | 2347 | 2409 | 6.65282784231 |
| NM_014171 | CRIPT   | 3419 | 3466 | 7.64881024236 |
| NM_178040 | ERC1    | 2601 | 2662 | 5.5745265855  |
| NM_178040 | ERC1    | 3742 | 3790 | 6.57453308064 |
| NM_178040 | ERC1    | 7899 | 7978 | 5.57435956624 |
| NM_178040 | ERC1    | 8054 | 8107 | 7.15948908622 |
| NM_178040 | ERC1    | 4146 | 4200 | 6.57453331633 |
| NM_178040 | ERC1    | 3823 | 3855 | 5.57051571638 |
| NM_178040 | ERC1    | 2891 | 2987 | 5.57453308064 |
| NM_178040 | ERC1    | 1883 | 1958 | 6.5745265855  |
| NM_178040 | ERC1    | 90   | 165  | 5.57453308064 |
| NM_021090 | MTMR3   | 1690 | 1745 | 7.75273434664 |
| NM_021090 | MTMR3   | 1135 | 1207 | 6.75290136591 |
| NM_021095 | SLC5A6  | 2293 | 2321 | 4.04915027463 |
| NM_021095 | SLC5A6  | 1975 | 2027 | 6.37125211984 |
| NM_021095 | SLC5A6  | 461  | 513  | 5.63428652545 |
| NM_021095 | SLC5A6  | 2591 | 2656 | 6.04932402495 |
| NM_021095 | SLC5A6  | 2389 | 2452 | 5.04915027463 |
| NM_021095 | SLC5A6  | 2966 | 3080 | 6.85667894701 |
| NM_021095 | SLC5A6  | 3148 | 3220 | 6.04932402495 |
| NM_021095 | SLC5A6  | 2481 | 2541 | 4.0493240174  |
| NM_021095 | SLC5A6  | 2256 | 2291 | 5.04530642478 |
| NM_021095 | SLC5A6  | 515  | 722  | 7.95621462056 |
| NM_021095 | SLC5A6  | 2762 | 2931 | 6.85667894701 |
| NM_021095 | SLC5A6  | 1709 | 1769 | 6.04932402495 |
| NM_021095 | SLC5A6  | 2040 | 2243 | 8.04932402495 |
| NM_021095 | SLC5A6  | 1782 | 1937 | 7.63428652567 |
| NM_021095 | SLC5A6  | 1488 | 1701 | 8.21924902639 |
| NM_021095 | SLC5A6  | 756  | 1100 | 9.50875564359 |
| NM_021095 | SLC5A6  | 249  | 450  | 7.85667894701 |
| NM_021095 | SLC5A6  | 1240 | 1486 | 7.04932402495 |
| NM_021095 | SLC5A6  | 1114 | 1203 | 6.63428652567 |
| NM_021098 | CACNA1H | 3209 | 3249 | 12.4801916254 |
| NM_021098 | CACNA1H | 1452 | 1528 | 12.5643241037 |
| NM_021098 | CACNA1H | 999  | 1052 | 14.5603132346 |
| NM_021098 | CACNA1H | 5444 | 5517 | 13.5643308348 |
| NM_021098 | CACNA1H | 1312 | 1351 | 12.4801916254 |
| NM_021098 | CACNA1H | 5076 | 5160 | 13.5643308272 |
| NM_021098 | CACNA1H | 2751 | 2804 | 12.4801916254 |
| NM_021098 | CACNA1H | 7169 | 7203 | 12.5603132346 |
| NM_021098 | CACNA1H | 3762 | 3804 | 12.4801916254 |
| NM_021098 | CACNA1H | 3288 | 3378 | 12.4801916254 |
| NM_001587 | OCRL    | 575  | 618  | 7.54262552669 |
| NM_001587 | OCRL    | 843  | 906  | 6.95766302597 |
| NM_001587 | OCRL    | 1764 | 1808 | 5.87754141676 |
| NM_001587 | OCRL    | 2018 | 2073 | 6.96150687583 |
| NM_001587 | OCRL    | 2554 | 2618 | 5.96168039023 |
| NM_001587 | OCRL    | 2355 | 2439 | 6.95766302597 |
| NM_001587 | OCRL    | 4827 | 4875 | 5.96150687583 |
| NM_001587 | OCRL    | 3489 | 3540 | 5.87754141676 |

|              |        |      |      |               |
|--------------|--------|------|------|---------------|
| NM_001587    | OCRL   | 1280 | 1370 | 5.96168062614 |
| NM_001587    | OCRL   | 926  | 1047 | 8.54664312687 |
| NM_001587    | OCRL   | 2230 | 2317 | 7.54664312687 |
| NM_001587    | OCRL   | 3665 | 3724 | 5.95766302597 |
| NM_001587    | OCRL   | 2842 | 2921 | 6.96167389509 |
| NM_001587    | OCRL   | 2465 | 2542 | 5.96167389509 |
| NM_001587    | OCRL   | 2722 | 2796 | 7.96167389509 |
| NM_001587    | OCRL   | 1406 | 1469 | 7.96168062592 |
| NM_001076785 | SLC7A6 | 1588 | 1645 | 9.9733935852  |
| NM_001076785 | SLC7A6 | 4403 | 4457 | 7.65145875926 |
| NM_001076785 | SLC7A6 | 2730 | 2794 | 9.23642798349 |
| NM_001076785 | SLC7A6 | 2650 | 2730 | 9.65146549032 |
| NM_001076785 | SLC7A6 | 6189 | 6250 | 8.65146549032 |
| NM_001076785 | SLC7A6 | 4484 | 4523 | 7.56732628093 |
| NM_001076785 | SLC7A6 | 1218 | 1301 | 9.23642798349 |
| NM_001076785 | SLC7A6 | 1499 | 1557 | 8.65146548277 |
| NM_001076785 | SLC7A6 | 539  | 591  | 8.65146549032 |
| NM_001076785 | SLC7A6 | 1111 | 1179 | 9.9733935852  |
| NM_001076785 | SLC7A6 | 784  | 872  | 10.6514654903 |
| NM_001076785 | SLC7A6 | 2538 | 2606 | 9.6514652544  |
| NM_001076785 | SLC7A6 | 1418 | 1477 | 7.56732628093 |
| NM_001076785 | SLC7A6 | 3240 | 3352 | 10.236427991  |
| NM_001076785 | SLC7A6 | 2957 | 3029 | 8.64744789014 |
| NM_001076785 | SLC7A6 | 1317 | 1415 | 10.236427991  |
| NM_001076785 | SLC7A6 | 885  | 1104 | 10.6514654903 |
| NM_001076785 | SLC7A6 | 141  | 240  | 9.23642799104 |
| NM_006809    | TOMM34 | 289  | 391  | 5.08344621772 |
| NM_006809    | TOMM34 | 1423 | 1484 | 4.07960236787 |
| NM_006809    | TOMM34 | 434  | 506  | 6.8909748901  |
| NM_006809    | TOMM34 | 873  | 968  | 6.08361996804 |
| NM_006809    | TOMM34 | 672  | 738  | 4.08344621772 |
| NM_006808    | SEC61B | 179  | 211  | 5.54857316351 |
| NM_006808    | SEC61B | 5    | 65   | 6.55259076367 |
| NM_006808    | SEC61B | 99   | 137  | 5.55259075613 |
| NM_006808    | SEC61B | 282  | 481  | 9.87451885857 |
| NM_000368    | TSC1   | 2623 | 2691 | 5.47251559815 |
| NM_000368    | TSC1   | 815  | 883  | 6.97334562054 |
| NM_006801    | KDELR1 | 1050 | 1157 | 8.5510168735  |
| NM_006801    | KDELR1 | 922  | 1049 | 7.67654775559 |
| NM_006801    | KDELR1 | 1457 | 1535 | 5.67654775559 |
| NM_006801    | KDELR1 | 150  | 182  | 4.08756765469 |
| NM_006801    | KDELR1 | 1386 | 1419 | 6.09158525487 |
| NM_006801    | KDELR1 | 872  | 922  | 6.09158525487 |
| NM_006801    | KDELR1 | 74   | 149  | 5.09158525487 |
| NM_006801    | KDELR1 | 184  | 617  | 10.3395127683 |
| NM_006801    | KDELR1 | 646  | 865  | 9.13597937423 |
| NM_006801    | KDELR1 | 1221 | 1356 | 6.09158525487 |
| NM_133259    | LRPPRC | 1081 | 1130 | 3.6011068037  |
| NM_133259    | LRPPRC | 3316 | 3384 | 3.60110681124 |
| NM_133259    | LRPPRC | 674  | 734  | 5.18606931197 |

|           |         |      |      |               |
|-----------|---------|------|------|---------------|
| NM_133259 | LRPPRC  | 1374 | 1414 | 4.92303490613 |
| NM_133259 | LRPPRC  | 4259 | 4330 | 4.92303490613 |
| NM_133259 | LRPPRC  | 409  | 470  | 4.18606931197 |
| NM_133259 | LRPPRC  | 830  | 884  | 2.60093306093 |
| NM_133259 | LRPPRC  | 3941 | 4013 | 4.60110681124 |
| NM_133259 | LRPPRC  | 3068 | 3119 | 4.18606931197 |
| NM_133259 | LRPPRC  | 1147 | 1290 | 6.4084617333  |
| NM_133259 | LRPPRC  | 3530 | 3594 | 3.60110681102 |
| NM_133259 | LRPPRC  | 302  | 352  | 5.18606931197 |
| NM_133259 | LRPPRC  | 3398 | 3446 | 2.59708921107 |
| NM_133259 | LRPPRC  | 1961 | 2082 | 6.18606931197 |
| NM_133259 | LRPPRC  | 184  | 223  | 3.51696760186 |
| NM_133259 | LRPPRC  | 575  | 618  | 3.59708921107 |
| NM_133259 | LRPPRC  | 3847 | 3931 | 4.18606931197 |
| NM_133259 | LRPPRC  | 888  | 974  | 3.60110681124 |
| NM_133259 | LRPPRC  | 3120 | 3238 | 5.77103181269 |
| NM_133259 | LRPPRC  | 4556 | 4705 | 5.77103181269 |
| NM_133259 | LRPPRC  | 471  | 556  | 5.18606931197 |
| NM_133259 | LRPPRC  | 2096 | 2162 | 3.60110008019 |
| NM_133259 | LRPPRC  | 4342 | 4555 | 6.06053842988 |
| NM_133259 | LRPPRC  | 4854 | 4972 | 4.60110681124 |
| NM_133259 | LRPPRC  | 3688 | 3789 | 3.6011068037  |
| NM_133259 | LRPPRC  | 2472 | 2752 | 7.06053842988 |
| NM_133259 | LRPPRC  | 2162 | 2350 | 6.50799740685 |
| NM_133259 | LRPPRC  | 2763 | 2990 | 6.30154652939 |
| NM_133259 | LRPPRC  | 1689 | 1909 | 6.68856965249 |
| NM_133259 | LRPPRC  | 4050 | 4252 | 5.18606931197 |
| NM_133259 | LRPPRC  | 1429 | 1644 | 6.77103181269 |
| NM_000365 | TPI1    | 1166 | 1215 | 1.47200449869 |
| NM_000365 | TPI1    | 844  | 976  | 5.05696699942 |
| NM_000365 | TPI1    | 982  | 1075 | 3.27935942075 |
| NM_000365 | TPI1    | 712  | 836  | 3.05696699942 |
| NM_000365 | TPI1    | 5    | 705  | 6.40274183626 |
| NM_006805 | HNRNPA0 | 645  | 674  | 4.21699590621 |
| NM_006805 | HNRNPA0 | 765  | 818  | 5.21699590621 |
| NM_006805 | HNRNPA0 | 1914 | 1955 | 5.30113510805 |
| NM_006805 | HNRNPA0 | 1516 | 1560 | 5.80195840693 |
| NM_006805 | HNRNPA0 | 264  | 412  | 7.88609761632 |
| NM_006805 | HNRNPA0 | 45   | 111  | 6.3011351156  |
| NM_006805 | HNRNPA0 | 678  | 742  | 5.88609088526 |
| NM_006805 | HNRNPA0 | 2239 | 2288 | 4.29711751542 |
| NM_006805 | HNRNPA0 | 1957 | 2017 | 5.88208001614 |
| NM_006805 | HNRNPA0 | 193  | 260  | 5.88609761632 |
| NM_006805 | HNRNPA0 | 996  | 1056 | 5.29711751542 |
| NM_006805 | HNRNPA0 | 1328 | 1498 | 8.10849003765 |
| NM_006805 | HNRNPA0 | 469  | 641  | 6.62306321048 |
| NM_006805 | HNRNPA0 | 1075 | 1199 | 4.3011351156  |
| NM_006804 | STARD3  | 1367 | 1431 | 6.99754584449 |
| NM_006804 | STARD3  | 854  | 902  | 6.57849074504 |
| NM_006804 | STARD3  | 310  | 551  | 9.45697746313 |

|           |        |      |      |               |
|-----------|--------|------|------|---------------|
| NM_006804 | STARD3 | 1891 | 2013 | 6.58250834521 |
| NM_006804 | STARD3 | 751  | 822  | 6.99754584449 |
| NM_006804 | STARD3 | 1671 | 1815 | 7.31947393938 |
| NM_006804 | STARD3 | 600  | 721  | 6.99754584449 |
| NM_006750 | SNTB2  | 1994 | 2059 | 8.59422849995 |
| NM_006750 | SNTB2  | 3750 | 3827 | 9.594235231   |
| NM_006750 | SNTB2  | 4244 | 4311 | 9.59021763083 |
| NM_006750 | SNTB2  | 740  | 824  | 8.59422849995 |
| NM_003321 | TUFM   | 69   | 121  | 5.20527302824 |
| NM_003321 | TUFM   | 1252 | 1663 | 7.94223862241 |
| NM_003321 | TUFM   | 534  | 1164 | 8.77005764703 |
| NM_003321 | TUFM   | 181  | 508  | 6.94223862241 |
| NM_182931 | MLL5   | 6129 | 6215 | 6.4071730537  |
| NM_182931 | MLL5   | 5059 | 5115 | 5.4071730537  |
| NM_006755 | TALD01 | 613  | 689  | 5.85379940631 |
| NM_006755 | TALD01 | 309  | 391  | 5.85379940631 |
| NM_006755 | TALD01 | 913  | 1035 | 6.66115432837 |
| NM_006755 | TALD01 | 1058 | 1210 | 7.76069000192 |
| NM_006755 | TALD01 | 776  | 877  | 5.43876189949 |
| NM_006755 | TALD01 | 410  | 599  | 7.66115432837 |
| NM_006755 | TALD01 | 35   | 98   | 5.43876190703 |
| NM_003325 | HIRA   | 414  | 486  | 6.03817808822 |
| NM_003325 | HIRA   | 663  | 774  | 7.8455330105  |
| NM_003325 | HIRA   | 1547 | 1594 | 6.03817808089 |
| NM_003325 | HIRA   | 2174 | 2211 | 6.03416048827 |
| NM_003325 | HIRA   | 2680 | 2836 | 8.8455330105  |
| NM_003325 | HIRA   | 1716 | 1768 | 5.03416048827 |
| NM_003325 | HIRA   | 856  | 917  | 6.62313385811 |
| NM_003325 | HIRA   | 2424 | 2495 | 6.03817808089 |
| NM_003325 | HIRA   | 3645 | 3688 | 5.95403887906 |
| NM_003325 | HIRA   | 1972 | 2028 | 5.03416048827 |
| NM_003325 | HIRA   | 280  | 352  | 6.62314058916 |
| NM_003325 | HIRA   | 807  | 842  | 6.03817135739 |
| NM_003325 | HIRA   | 1372 | 1426 | 5.03817808089 |
| NM_003325 | HIRA   | 2499 | 2568 | 6.03817808089 |
| NM_003325 | HIRA   | 990  | 1060 | 7.03817808844 |
| NM_003325 | HIRA   | 2111 | 2171 | 5.03817135739 |
| NM_003325 | HIRA   | 1799 | 1933 | 7.36010618333 |
| NM_003325 | HIRA   | 577  | 642  | 6.03817135739 |
| NM_003325 | HIRA   | 1596 | 1702 | 7.03817808844 |
| NM_003325 | HIRA   | 3707 | 3789 | 6.03817808844 |
| NM_003325 | HIRA   | 1103 | 1300 | 8.49760970708 |
| NM_003325 | HIRA   | 3800 | 3857 | 6.62314058894 |
| NM_003325 | HIRA   | 3129 | 3226 | 6.62314058894 |
| NM_006759 | UGP2   | 1293 | 1349 | 6.05408955538 |
| NM_006759 | UGP2   | 1519 | 1573 | 5.73216146072 |
| NM_006759 | UGP2   | 587  | 626  | 3.64802225133 |
| NM_006759 | UGP2   | 676  | 836  | 7.63905205632 |
| NM_006759 | UGP2   | 2056 | 2112 | 4.72814386054 |
| NM_006759 | UGP2   | 365  | 504  | 6.73216146072 |



|              |        |      |      |               |
|--------------|--------|------|------|---------------|
| NM_006759    | UGP2   | 979  | 1165 | 7.81962430197 |
| NM_006759    | UGP2   | 1196 | 1286 | 5.73216146072 |
| NM_006759    | UGP2   | 1351 | 1516 | 7.43260117886 |
| NM_006759    | UGP2   | 838  | 978  | 5.73216146072 |
| NM_006759    | UGP2   | 1719 | 1919 | 7.31712396144 |
| NM_006759    | UGP2   | 1649 | 1713 | 4.72814386054 |
| NM_003329    | TXN    | 123  | 214  | 7.90644081783 |
| NM_003329    | TXN    | 226  | 500  | 10.4089411584 |
| NM_006208    | ENPP1  | 1735 | 1786 | 3.62328093678 |
| NM_006208    | ENPP1  | 1161 | 1259 | 5.208250161   |
| NM_006208    | ENPP1  | 1091 | 1152 | 3.61927006766 |
| NM_006208    | ENPP1  | 691  | 767  | 3.62328743191 |
| NM_006208    | ENPP1  | 2872 | 2930 | 3.53914845845 |
| NM_006208    | ENPP1  | 6760 | 6798 | 3.62311391751 |
| NM_006208    | ENPP1  | 2643 | 2736 | 5.20825016855 |
| NM_006208    | ENPP1  | 6436 | 6498 | 3.62328766783 |
| NM_006208    | ENPP1  | 4024 | 4075 | 3.61927006766 |
| NM_006208    | ENPP1  | 1871 | 1967 | 5.208250161   |
| NM_006208    | ENPP1  | 1556 | 1711 | 5.20825016855 |
| NM_006208    | ENPP1  | 1318 | 1416 | 6.62328766783 |
| NM_006208    | ENPP1  | 368  | 465  | 5.62328766783 |
| NM_006208    | ENPP1  | 2385 | 2462 | 5.62328766783 |
| NM_001167749 | ADCY10 | 903  | 965  | 14.7797985117 |
| NM_003981    | PRC1   | 566  | 662  | 5.34118766633 |
| NM_003981    | PRC1   | 430  | 483  | 4.9261501595  |
| NM_003981    | PRC1   | 2256 | 2313 | 3.34118093527 |
| NM_003981    | PRC1   | 959  | 1015 | 3.25704845694 |
| NM_003981    | PRC1   | 2729 | 2836 | 6.14854258839 |
| NM_003981    | PRC1   | 1618 | 1714 | 3.34118766633 |
| NM_003981    | PRC1   | 2515 | 2573 | 4.25704845694 |
| NM_003981    | PRC1   | 2838 | 2926 | 4.92615016705 |
| NM_003981    | PRC1   | 361  | 406  | 4.33717006615 |
| NM_003981    | PRC1   | 1201 | 1297 | 4.92615016705 |
| NM_003981    | PRC1   | 1020 | 1175 | 5.92615016705 |
| NM_003981    | PRC1   | 2989 | 3087 | 6.34118766633 |
| NM_003981    | PRC1   | 2395 | 2490 | 5.34118766633 |
| NM_003981    | PRC1   | 1448 | 1611 | 4.34118766633 |
| NM_003981    | PRC1   | 2044 | 2184 | 5.92615016705 |
| NM_003981    | PRC1   | 188  | 313  | 4.34118766633 |
| NM_003981    | PRC1   | 1731 | 1820 | 6.14854258839 |
| NM_003981    | PRC1   | 765  | 855  | 4.34118766633 |
| NM_001172697 | TSFM   | 532  | 587  | 7.65284671652 |
| NM_001172697 | TSFM   | 319  | 430  | 7.65685758564 |
| NM_170743    | IL28RA | 3960 | 4051 | 8.90242594431 |
| NM_004539    | NARS   | 2492 | 2565 | 2.34846545619 |
| NM_004539    | NARS   | 2007 | 2038 | 3.34863919896 |
| NM_004539    | NARS   | 1955 | 2003 | 4.67056706548 |
| NM_004539    | NARS   | 1889 | 1929 | 3.34462160633 |
| NM_004539    | NARS   | 2330 | 2416 | 2.34863920651 |
| NM_004539    | NARS   | 794  | 959  | 6.43610204776 |

|              |           |      |      |               |               |
|--------------|-----------|------|------|---------------|---------------|
| NM_004539    | NARS      | 224  | 268  | 3.34846545619 |               |
| NM_004539    | NARS      | 2072 | 2148 | 2.34863920651 |               |
| NM_004539    | NARS      | 2812 | 2842 | 2.34846545619 |               |
| NM_004539    | NARS      | 2652 | 2704 | 3.34863920629 |               |
| NM_004539    | NARS      | 1082 | 1712 | 8.34863920651 |               |
| NM_004539    | NARS      | 2190 | 2290 | 5.34863920651 |               |
| NM_004539    | NARS      | 2709 | 2770 | 3.93360170722 |               |
| NM_004539    | NARS      | 966  | 1081 | 3.34863920651 |               |
| NM_004539    | NARS      | 274  | 533  | 4.93360170723 |               |
| NM_004539    | NARS      | 540  | 769  | 5.34863920651 |               |
| NM_004539    | NARS      | 1728 | 1842 | 6.34863920651 |               |
| NM_001009936 | PHF19     | 868  | 939  | 8.62880274317 |               |
| NM_198447    | GOLT1A    | 201  | 359  | 11.5148343274 |               |
| NM_198447    | GOLT1A    | 657  | 784  | 7.34490932599 |               |
| NM_198447    | GOLT1A    | 414  | 534  | 8.34490932599 |               |
| NM_198447    | GOLT1A    | 538  | 649  | 10.5148343274 |               |
| NM_001199623 | CIDEC     | 561  | 602  | 7.51118111188 |               |
| NM_001199623 | CIDEC     | 472  | 529  | 6.51118111188 |               |
| NM_001199620 | NCOA7     | 3299 | 3360 | 7.43344787964 |               |
| NM_001199620 | NCOA7     | 1200 | 1248 | 5.84831835965 |               |
| NM_000182    | HADHA     | 1724 | 1761 | 2.77285037151 |               |
| NM_000182    | HADHA     | 252  | 310  | 1.10374866141 |               |
| NM_000182    | HADHA     | 686  | 748  | 2.18387027062 |               |
| NM_000182    | HADHA     | 1610 | 1724 | 1.18788787079 |               |
| NM_000182    | HADHA     | 814  | 904  | 1.18788787079 |               |
| NM_000182    | HADHA     | 1457 | 1568 | 2.77285037152 |               |
| NM_000182    | HADHA     | 1792 | 1996 | 3.50981596568 |               |
| NM_000182    | HADHA     | 1262 | 1441 | 4.35781287224 |               |
| NM_000182    | HADHA     | 2015 | 2147 | 3.18788787079 |               |
| NM_000182    | HADHA     | 989  | 1180 | 4.50981596568 |               |
| NM_000182    | HADHA     | 2214 | 2333 | 2.77285037152 |               |
| NM_032937    | C9orf37   | 472  | 564  | 11.1504506777 |               |
| NM_000181    | GUSB      | 227  | 302  | 7.35548311531 |               |
| NM_000181    | GUSB      | 986  | 1144 | 8.61851752114 |               |
| NM_000181    | GUSB      | 841  | 977  | 8.84090994248 |               |
| NM_000181    | GUSB      | 594  | 808  | 8.84090994248 |               |
| NM_000181    | GUSB      | 1176 | 1267 | 8.03355502042 |               |
| NM_000181    | GUSB      | 1703 | 1989 | 9.98775133081 |               |
| NM_000181    | GUSB      | 1294 | 1688 | 10.1628380374 |               |
| NM_000181    | GUSB      | 2056 | 2242 | 8.61851752114 |               |
| NM_000181    | GUSB      | 306  | 502  | 8.73399473856 |               |
| NM_032932    | RAB11FIP4 |      | 619  | 666           | 3.30613713537 |
| NM_032932    | RAB11FIP4 |      | 6615 | 6667          | 3.30613713537 |
| NM_032932    | RAB11FIP4 |      | 1029 | 1114          | 4.38625874458 |
| NM_032932    | RAB11FIP4 |      | 1834 | 1939          | 4.39027634475 |
| NM_000187    | HGD       | 779  | 831  | 6.88547302858 |               |
| NM_000187    | HGD       | 1340 | 1406 | 7.30050380435 |               |
| NM_000187    | HGD       | 397  | 442  | 7.30051029949 |               |
| NM_000187    | HGD       | 1917 | 2004 | 6.29649293523 |               |
| NM_000187    | HGD       | 1644 | 1745 | 7.62243862275 |               |

|              |          |      |      |               |                |
|--------------|----------|------|------|---------------|----------------|
| NM_000187    | HGD      | 458  | 513  | 6.88145543596 |                |
| NM_000185    | SERPIND1 |      | 2130 | 2173          | 0.693765078683 |
| NM_000185    | SERPIND1 |      | 995  | 1022          | 0.693765078683 |
| NM_000185    | SERPIND1 |      | 292  | 340           | 1.77388668789  |
| NM_000185    | SERPIND1 |      | 1280 | 1332          | 1.77388668789  |
| NM_000185    | SERPIND1 |      | 1211 | 1257          | 0.777904280517 |
| NM_000185    | SERPIND1 |      | 1030 | 1092          | 1.77790405215  |
| NM_000185    | SERPIND1 |      | 517  | 610           | 1.77790428052  |
| NM_000185    | SERPIND1 |      | 658  | 714           | 1.77790428807  |
| NM_000185    | SERPIND1 |      | 890  | 945           | 2.35884918861  |
| NM_000185    | SERPIND1 |      | 1740 | 1854          | 1.77790428807  |
| NM_000185    | SERPIND1 |      | 762  | 856           | 0.777897557013 |
| NM_000189    | HK2      | 3974 | 4058 | 4.50017613766 |                |
| NM_000189    | HK2      | 6576 | 6615 | 3.50017590174 |                |
| NM_000189    | HK2      | 3750 | 3792 | 4.50000238734 |                |
| NM_000189    | HK2      | 4454 | 4496 | 5.08513863083 |                |
| NM_000189    | HK2      | 3315 | 3376 | 4.49615853749 |                |
| NM_000189    | HK2      | 2743 | 2822 | 4.50017613766 |                |
| NM_000189    | HK2      | 4283 | 4334 | 4.50000238734 |                |
| NM_000189    | HK2      | 4088 | 4135 | 4.50016940661 |                |
| NM_000189    | HK2      | 2259 | 2324 | 4.50017590174 |                |
| NM_000189    | HK2      | 4635 | 4718 | 3.50016940661 |                |
| NM_000189    | HK2      | 2345 | 2397 | 3.50000238734 |                |
| NM_000189    | HK2      | 3859 | 3948 | 3.50017613766 |                |
| NM_000189    | HK2      | 3016 | 3076 | 3.49615853749 |                |
| NM_000189    | HK2      | 2505 | 2592 | 5.82210423255 |                |
| NM_003185    | TAF4     | 4300 | 4381 | 5.31237550323 |                |
| NM_003184    | TAF2     | 4930 | 4968 | 6.69541698554 |                |
| NM_003184    | TAF2     | 4499 | 4572 | 6.77553859475 |                |
| NM_003184    | TAF2     | 2705 | 2761 | 7.77938244461 |                |
| NM_003184    | TAF2     | 2168 | 2207 | 6.77553859475 |                |
| NM_003184    | TAF2     | 3909 | 3962 | 8.36050109548 |                |
| NM_003184    | TAF2     | 3567 | 3606 | 6.69541698554 |                |
| NM_003184    | TAF2     | 1333 | 1430 | 6.77955595901 |                |
| NM_003184    | TAF2     | 2890 | 2947 | 7.69541698554 |                |
| NM_003183    | ADAM17   | 269  | 329  | 7.47035437988 |                |
| NM_003183    | ADAM17   | 2281 | 2358 | 6.88539187937 |                |
| NM_003183    | ADAM17   | 1100 | 1152 | 8.4703543801  |                |
| NM_003183    | ADAM17   | 1210 | 1252 | 7.47018062978 |                |
| NM_003183    | ADAM17   | 1607 | 1688 | 7.4703543801  |                |
| NM_003183    | ADAM17   | 1365 | 1453 | 7.47035437988 |                |
| NM_003183    | ADAM17   | 488  | 565  | 8.69274680144 |                |
| NM_003183    | ADAM17   | 64   | 89   | 5.8813742792  |                |
| NM_003183    | ADAM17   | 3212 | 3285 | 7.88539187938 |                |
| NM_003183    | ADAM17   | 1891 | 2179 | 9.88539187938 |                |
| NM_003183    | ADAM17   | 2727 | 2792 | 7.8813742792  |                |
| NM_003183    | ADAM17   | 2182 | 2280 | 7.4703543801  |                |
| NM_003183    | ADAM17   | 935  | 995  | 7.4703543801  |                |
| NM_020320    | RARS2    | 816  | 852  | 3.04435456928 |                |
| NM_001197129 | SYS1     | 371  | 443  | 8.80719407334 |                |

|              |        |      |      |                 |
|--------------|--------|------|------|-----------------|
| NM_001197129 | SYS1   | 2529 | 2581 | 9.80317647317   |
| NM_001197129 | SYS1   | 1938 | 1989 | 10.3881389739   |
| NM_001197129 | SYS1   | 621  | 697  | 10.8071940733   |
| NM_001197129 | SYS1   | 469  | 609  | 10.3921565741   |
| NM_000988    | RPL27  | 195  | 262  | 0.234635046052  |
| NM_000988    | RPL27  | 26   | 188  | 4.87849123583   |
| NM_000988    | RPL27  | 271  | 369  | 4.04198996811   |
| NM_000988    | RPL27  | 382  | 474  | 3.04198996811   |
| NM_000989    | RPL30  | 64   | 501  | 5.05702555088   |
| NM_000982    | RPL21  | 3    | 70   | 2.02790658238   |
| NM_000982    | RPL21  | 301  | 430  | 4.03192418255   |
| NM_000982    | RPL21  | 453  | 561  | 3.83927910461   |
| NM_000982    | RPL21  | 73   | 298  | 4.83927910461   |
| NM_000983    | RPL22  | 229  | 281  | 1.16362861135   |
| NM_000983    | RPL22  | 307  | 365  | 1.97098353341   |
| NM_000983    | RPL22  | 1373 | 1443 | 0.748591112071  |
| NM_000983    | RPL22  | 814  | 868  | 0.163628611127  |
| NM_000983    | RPL22  | 373  | 565  | 2.74859111207   |
| NM_000983    | RPL22  | 82   | 228  | 3.07051920696   |
| NM_000983    | RPL22  | 633  | 777  | 2.16362861135   |
| NM_000983    | RPL22  | 1583 | 1702 | 1.97098353341   |
| NM_000983    | RPL22  | 878  | 977  | 0.748591112071  |
| NM_000980    | RPL18A | 353  | 401  | 3.29246944663   |
| NM_000980    | RPL18A | 404  | 555  | 4.29246968255   |
| NM_000980    | RPL18A | 138  | 346  | 6.56548817695   |
| NM_000981    | RPL19  | 650  | 707  | 0.23561162052   |
| NM_000981    | RPL19  | 68   | 284  | 1.97257721469   |
| NM_000981    | RPL19  | 321  | 509  | 2.45800404186   |
| NM_000981    | RPL19  | 510  | 647  | -1.3493508802   |
| NM_000986    | RPL24  | 1    | 384  | 5.0487310908    |
| NM_000986    | RPL24  | 401  | 497  | 3.26023519599   |
| NM_000987    | RPL26  | 87   | 159  | 0.154682920525  |
| NM_000987    | RPL26  | 166  | 495  | 1.61411453916   |
| NM_000984    | RPL23A | 835  | 942  | 0.866472647207  |
| NM_000984    | RPL23A | 77   | 210  | 0.451435147934  |
| NM_000984    | RPL23A | 720  | 820  | -0.133527588706 |
| NM_000984    | RPL23A | 226  | 587  | 4.53889798918   |
| NM_000985    | RPL17  | 593  | 858  | 6.44285482477   |
| NM_000985    | RPL17  | 109  | 417  | 6.53031766603   |
| NM_000985    | RPL17  | 429  | 544  | 4.76478291966   |
| NM_005273    | GNB2   | 573  | 661  | 7.20539058325   |
| NM_005273    | GNB2   | 315  | 504  | 8.5839022065    |
| NM_005273    | GNB2   | 867  | 1177 | 8.97092532961   |
| NM_005273    | GNB2   | 1207 | 1321 | 6.88346248836   |
| NM_005273    | GNB2   | 697  | 861  | 7.46842498908   |
| NM_002052    | GATA4  | 2409 | 2452 | 7.39150235018   |
| NM_002052    | GATA4  | 3143 | 3199 | 8.7975696469    |
| NM_002052    | GATA4  | 1166 | 1229 | 7.9764648509    |
| NM_002052    | GATA4  | 398  | 510  | 8.47564155957   |
| NM_002052    | GATA4  | 2970 | 3040 | 7.47546780925   |

|           |         |      |      |               |
|-----------|---------|------|------|---------------|
| NM_002052 | GATA4   | 2549 | 2631 | 7.47564155934 |
| NM_002052 | GATA4   | 179  | 311  | 8.06060406029 |
| NM_002052 | GATA4   | 1966 | 2043 | 8.06059732923 |
| NM_013279 | C11orf9 | 5398 | 5476 | 9.62274340958 |
| NM_013279 | C11orf9 | 3875 | 3999 | 9.81538848752 |
| NM_013279 | C11orf9 | 3333 | 3390 | 9.62274340958 |
| NM_013279 | C11orf9 | 3069 | 3171 | 9.40035098824 |
| NM_013279 | C11orf9 | 121  | 211  | 9.81538848752 |
| NM_013279 | C11orf9 | 4659 | 4702 | 6.81538847997 |
| NM_013279 | C11orf9 | 5649 | 5715 | 8.40035098824 |
| NM_013279 | C11orf9 | 2519 | 2567 | 6.81137088735 |
| NM_013279 | C11orf9 | 2765 | 2821 | 6.81538848752 |
| NM_013279 | C11orf9 | 394  | 458  | 6.81538847997 |
| NM_013279 | C11orf9 | 4772 | 4867 | 9.13731658241 |
| NM_013279 | C11orf9 | 1775 | 1856 | 8.81538848752 |
| NM_013279 | C11orf9 | 1488 | 1593 | 7.81538848752 |
| NM_013279 | C11orf9 | 3738 | 3804 | 8.40035098824 |
| NM_013279 | C11orf9 | 3234 | 3294 | 9.13731658241 |
| NM_013279 | C11orf9 | 2567 | 2662 | 8.81538848752 |
| NM_013279 | C11orf9 | 3438 | 3522 | 6.81538848752 |
| NM_013279 | C11orf9 | 1307 | 1420 | 8.40035098824 |
| NM_013279 | C11orf9 | 4727 | 4770 | 6.81137088735 |
| NM_013279 | C11orf9 | 2956 | 3069 | 8.40035098824 |
| NM_013279 | C11orf9 | 4010 | 4058 | 6.73124927814 |
| NM_013279 | C11orf9 | 593  | 679  | 6.81538848752 |
| NM_013279 | C11orf9 | 4362 | 4492 | 8.81538848752 |
| NM_013279 | C11orf9 | 1071 | 1198 | 9.62274340958 |
| NM_013279 | C11orf9 | 1003 | 1071 | 6.81137088735 |
| NM_013279 | C11orf9 | 4565 | 4656 | 6.81538848752 |
| NM_013279 | C11orf9 | 5254 | 5396 | 8.81538848752 |
| NM_013279 | C11orf9 | 1909 | 2126 | 8.81538848752 |
| NM_013279 | C11orf9 | 1694 | 1761 | 8.40035098802 |
| NM_013279 | C11orf9 | 731  | 889  | 6.81538848752 |
| NM_013279 | C11orf9 | 5580 | 5647 | 8.8153884873  |
| NM_013279 | C11orf9 | 4115 | 4299 | 9.40035098824 |
| NM_013279 | C11orf9 | 4907 | 5171 | 10.4003509882 |
| NM_013279 | C11orf9 | 2339 | 2515 | 8.40035098824 |
| NM_002056 | GFPT1   | 195  | 260  | 3.7458920247  |
| NM_002056 | GFPT1   | 3799 | 3901 | 3.74589202492 |
| NM_002056 | GFPT1   | 6277 | 6322 | 4.66175281554 |
| NM_002056 | GFPT1   | 2904 | 2986 | 4.33085452564 |
| NM_002056 | GFPT1   | 1523 | 1602 | 4.33085428972 |
| NM_002056 | GFPT1   | 6473 | 6551 | 3.74187442475 |
| NM_002056 | GFPT1   | 827  | 905  | 5.06782011981 |
| NM_002056 | GFPT1   | 1339 | 1521 | 5.91581702636 |
| NM_002056 | GFPT1   | 1984 | 2135 | 5.91581702636 |
| NM_002056 | GFPT1   | 2169 | 2287 | 5.55324694698 |
| NM_002056 | GFPT1   | 1636 | 1834 | 6.55324694698 |
| NM_002056 | GFPT1   | 1022 | 1092 | 2.74589202492 |
| NM_002056 | GFPT1   | 1096 | 1336 | 6.33085452564 |

|           |         |       |       |               |
|-----------|---------|-------|-------|---------------|
| NM_002056 | GFPT1   | 1851  | 1961  | 6.33085452564 |
| NM_013275 | ANKRD11 | 350   | 404   | 3.88516432893 |
| NM_013275 | ANKRD11 | 6354  | 6392  | 3.88516410056 |
| NM_013275 | ANKRD11 | 2125  | 2211  | 3.8811467363  |
| NM_013275 | ANKRD11 | 651   | 712   | 3.88515760542 |
| NM_013275 | ANKRD11 | 5632  | 5698  | 5.47012683719 |
| NM_013275 | ANKRD11 | 2905  | 3005  | 4.88516433648 |
| NM_013275 | ANKRD11 | 1538  | 1597  | 4.80102512709 |
| NM_013275 | ANKRD11 | 5808  | 5878  | 4.88515760542 |
| NM_013276 | SHPK    | 1513  | 1587  | 10.7139730439 |
| NM_013276 | SHPK    | 1288  | 1337  | 9.12499294323 |
| NM_013276 | SHPK    | 722   | 784   | 10.1249929432 |
| NM_013276 | SHPK    | 553   | 614   | 10.044871334  |
| NM_013276 | SHPK    | 1934  | 2013  | 10.1288367931 |
| NM_005904 | SMAD7   | 1701  | 1756  | 7.53971342343 |
| NM_005904 | SMAD7   | 1791  | 1832  | 8.45574796437 |
| NM_181784 | SPRED2  | 1679  | 1759  | 5.12375984921 |
| NM_181784 | SPRED2  | 2239  | 2285  | 6.03962063983 |
| NM_181784 | SPRED2  | 2041  | 2105  | 6.70872234971 |
| NM_181784 | SPRED2  | 673   | 783   | 6.70872234993 |
| NM_005275 | GNL1    | 1945  | 1981  | 7.38952456298 |
| NM_005275 | GNL1    | 1623  | 1655  | 5.80456206226 |
| NM_005275 | GNL1    | 3227  | 3294  | 8.13050775732 |
| NM_005275 | GNL1    | 2498  | 2641  | 8.80857966243 |
| NM_005275 | GNL1    | 1749  | 1798  | 7.38952456298 |
| NM_005275 | GNL1    | 1800  | 1941  | 7.80857966243 |
| NM_005275 | GNL1    | 2008  | 2058  | 6.80857966243 |
| NM_005275 | GNL1    | 2719  | 2850  | 5.80857966243 |
| NM_005275 | GNL1    | 2127  | 2205  | 6.80857966243 |
| NM_005275 | GNL1    | 2205  | 2380  | 7.80857966243 |
| NM_005274 | GNG5    | 678   | 771   | 9.78710265541 |
| NM_005274 | GNG5    | 592   | 677   | 8.56471023406 |
| NM_005274 | GNG5    | 421   | 586   | 10.7871026554 |
| NM_005274 | GNG5    | 317   | 420   | 6.97974773334 |
| NM_000260 | MY07A   | 6154  | 6203  | 8.03352093417 |
| NM_000260 | MY07A   | 1567  | 1629  | 9.03753829842 |
| NM_000260 | MY07A   | 7281  | 7320  | 8.03736478402 |
| NM_000260 | MY07A   | 7146  | 7216  | 10.0375385343 |
| NM_005540 | INPP5B  | 3144  | 3186  | 8.997526785   |
| NM_005540 | INPP5B  | 2233  | 2319  | 9.99752654908 |
| NM_032151 | PCBD2   | 2086  | 2116  | 7.87628526079 |
| NM_000267 | NF1     | 4872  | 4928  | 7.15683557521 |
| NM_000267 | NF1     | 928   | 975   | 6.23695718442 |
| NM_000267 | NF1     | 5676  | 5721  | 7.23695718442 |
| NM_000267 | NF1     | 10601 | 10657 | 6.24097454867 |
| NM_000267 | NF1     | 4292  | 4350  | 7.23695718442 |
| NM_000267 | NF1     | 7403  | 7470  | 6.24097454867 |
| NM_000267 | NF1     | 626   | 683   | 7.24096805354 |
| NM_000267 | NF1     | 7127  | 7185  | 7.24097454867 |
| NM_000267 | NF1     | 9029  | 9086  | 7.24097477704 |

|           |       |       |       |               |
|-----------|-------|-------|-------|---------------|
| NM_000267 | NF1   | 1344  | 1473  | 7.8259372853  |
| NM_000267 | NF1   | 1096  | 1151  | 6.23695718442 |
| NM_000267 | NF1   | 1545  | 1613  | 6.15683557521 |
| NM_000267 | NF1   | 2842  | 2883  | 7.24096805354 |
| NM_000267 | NF1   | 10893 | 10959 | 7.82191968514 |
| NM_000267 | NF1   | 8143  | 8197  | 7.23695718442 |
| NM_000267 | NF1   | 3481  | 3529  | 6.23695718442 |
| NM_000267 | NF1   | 2312  | 2360  | 6.15683557521 |
| NM_000267 | NF1   | 5383  | 5465  | 7.24097478437 |
| NM_000267 | NF1   | 1270  | 1333  | 6.15683557521 |
| NM_000267 | NF1   | 2439  | 2492  | 7.23695718442 |
| NM_000267 | NF1   | 3210  | 3367  | 7.24097478459 |
| NM_000267 | NF1   | 10023 | 10106 | 7.24096805354 |
| NM_000267 | NF1   | 4082  | 4184  | 8.82593728531 |
| NM_002583 | PAWR  | 1281  | 1332  | 2.34808968499 |
| NM_002583 | PAWR  | 681   | 733   | 2.35210728516 |
| NM_002583 | PAWR  | 1155  | 1247  | 3.35210704924 |
| NM_002582 | PARN  | 1411  | 1484  | 6.31849057937 |
| NM_002582 | PARN  | 1359  | 1407  | 5.2343516059  |
| NM_002582 | PARN  | 1847  | 1893  | 4.2343516059  |
| NM_002582 | PARN  | 974   | 1085  | 6.64041891017 |
| NM_133373 | PLCD3 | 2954  | 3015  | 8.04387807076 |
| NM_133373 | PLCD3 | 1321  | 1355  | 7.95973886138 |
| NM_133373 | PLCD3 | 1251  | 1298  | 9.0398604706  |
| NM_133373 | PLCD3 | 2052  | 2125  | 8.0398604706  |
| NM_133373 | PLCD3 | 2191  | 2225  | 7.95973886138 |
| NM_133373 | PLCD3 | 265   | 312   | 9.0398604706  |
| NM_133373 | PLCD3 | 3082  | 3114  | 8.95973886138 |
| NM_015339 | ADNP  | 647   | 729   | 6.82511938856 |
| NM_015339 | ADNP  | 3130  | 3178  | 5.82494563824 |
| NM_015339 | ADNP  | 1666  | 1745  | 6.82511938834 |
| NM_015339 | ADNP  | 2031  | 2084  | 5.82110178839 |
| NM_015339 | ADNP  | 228   | 263   | 5.82494563824 |
| NM_015339 | ADNP  | 810   | 880   | 5.82511915264 |
| NM_015339 | ADNP  | 2467  | 2515  | 5.82494563824 |
| NM_015339 | ADNP  | 393   | 472   | 6.41008188928 |
| NM_015339 | ADNP  | 3797  | 3864  | 5.82511265751 |
| NM_015339 | ADNP  | 3541  | 3620  | 6.41008188928 |
| NM_015339 | ADNP  | 1800  | 1925  | 7.14704748345 |
| NM_015339 | ADNP  | 4336  | 4377  | 5.74098017918 |
| NM_015339 | ADNP  | 3218  | 3303  | 5.82110178839 |
| NM_015339 | ADNP  | 2857  | 2953  | 6.41008188906 |
| NM_015339 | ADNP  | 475   | 583   | 5.82511938856 |
| NM_002586 | PBX2  | 1265  | 1355  | 5.59678869482 |
| NM_002586 | PBX2  | 730   | 819   | 6.18175119532 |
| NM_002586 | PBX2  | 531   | 624   | 4.5966149445  |
| NM_002586 | PBX2  | 1844  | 2010  | 6.18175119554 |
| NM_002276 | KRT19 | 1103  | 1151  | 3.4583791962  |
| NM_002276 | KRT19 | 1046  | 1103  | 5.78030729131 |
| NM_002276 | KRT19 | 689   | 1043  | 8.26573411848 |

|              |           |      |      |               |               |
|--------------|-----------|------|------|---------------|---------------|
| NM_002276    | KRT19     | 84   | 226  | 7.15881891456 |               |
| NM_002276    | KRT19     | 329  | 687  | 8.95023229275 |               |
| NM_002276    | KRT19     | 266  | 316  | 5.04334169714 |               |
| NM_002276    | KRT19     | 1172 | 1485 | 7.70630670986 |               |
| NM_001166161 | PPP1R9A   | 627  | 687  | 7.86520176166 |               |
| NM_001166161 | PPP1R9A   | 555  | 619  | 8.94916722073 |               |
| NM_001166161 | PPP1R9A   | 1509 | 1603 | 7.9493409635  |               |
| NM_001166161 | PPP1R9A   | 4870 | 4917 | 7.94532337087 |               |
| NM_001166161 | PPP1R9A   | 1134 | 1211 | 6.94933423999 |               |
| NM_001166161 | PPP1R9A   | 15   | 122  | 9.7566958931  |               |
| NM_001166161 | PPP1R9A   | 760  | 995  | 9.94934097105 |               |
| NM_001166161 | PPP1R9A   | 161  | 203  | 6.94916722073 |               |
| NM_001166161 | PPP1R9A   | 6162 | 6209 | 6.86520176166 |               |
| NM_002273    | KRT8      | 1674 | 1801 | 3.20103089777 |               |
| NM_002273    | KRT8      | 1408 | 1671 | 5.30056657132 |               |
| NM_002273    | KRT8      | 11   | 1405 | 7.81994073041 |               |
| NM_002271    | IP05      | 4639 | 4688 | 2.17104532973 |               |
| NM_002271    | IP05      | 4124 | 4188 | 4.17104533728 |               |
| NM_002271    | IP05      | 3591 | 3660 | 4.49297343217 |               |
| NM_002271    | IP05      | 626  | 673  | 4.16702773711 |               |
| NM_002271    | IP05      | 4204 | 4259 | 2.0869061279  |               |
| NM_002271    | IP05      | 853  | 988  | 6.17104533728 |               |
| NM_002271    | IP05      | 3711 | 3807 | 3.17104510136 |               |
| NM_002271    | IP05      | 690  | 832  | 5.63047695592 |               |
| NM_002271    | IP05      | 556  | 610  | 4.49297343217 |               |
| NM_002271    | IP05      | 4479 | 4579 | 4.97840025934 |               |
| NM_002271    | IP05      | 3808 | 3963 | 5.17104533728 |               |
| NM_002271    | IP05      | 385  | 524  | 6.49297343217 |               |
| NM_002271    | IP05      | 2847 | 3001 | 5.97840025934 |               |
| NM_002271    | IP05      | 1614 | 1964 | 7.56336276006 |               |
| NM_002271    | IP05      | 270  | 351  | 3.17104533728 |               |
| NM_002271    | IP05      | 2766 | 2838 | 3.17104533728 |               |
| NM_002271    | IP05      | 1053 | 1607 | 7.756007838   |               |
| NM_002271    | IP05      | 3326 | 3565 | 6.25850817853 |               |
| NM_002271    | IP05      | 3002 | 3324 | 6.07793593289 |               |
| NM_002271    | IP05      | 1967 | 2752 | 8.49297343217 |               |
| NM_002271    | IP05      | 5539 | 5653 | 4.49297343217 |               |
| NM_001166168 | NEK6      | 2267 | 2306 | 4.87799070194 |               |
| NM_001166168 | NEK6      | 1495 | 1574 | 3.87799070195 |               |
| NM_001166168 | NEK6      | 1581 | 1671 | 3.87799070195 |               |
| NM_001166168 | NEK6      | 921  | 952  | 3.79385149256 |               |
| NM_001166168 | NEK6      | 680  | 755  | 2.87397310177 |               |
| NM_001166168 | NEK6      | 1825 | 1925 | 2.8779906944  |               |
| NM_001166168 | NEK6      | 450  | 527  | 2.87397310177 |               |
| NM_144578    | MAPK1IP1L |      | 1955 | 1989          | 10.2476110781 |
| NM_144578    | MAPK1IP1L |      | 5296 | 5347          | 7.921665619   |
| NM_144578    | MAPK1IP1L |      | 2262 | 2355          | 7.92567648812 |
| NM_144578    | MAPK1IP1L |      | 170  | 248           | 9.5106457199  |
| NM_144578    | MAPK1IP1L |      | 1159 | 1220          | 8.84154400979 |
| NM_144578    | MAPK1IP1L |      | 1096 | 1141          | 9.50662811973 |



|              |             |      |      |               |
|--------------|-------------|------|------|---------------|
| NM_144578    | MAPK1IP1L   | 900  | 954  | 7.92568298326 |
| NM_144578    | MAPK1IP1L   | 3348 | 3426 | 7.92568321918 |
| NM_144578    | MAPK1IP1L   | 3696 | 3766 | 7.92568321917 |
| NM_144578    | MAPK1IP1L   | 772  | 869  | 9.5106457199  |
| NM_144578    | MAPK1IP1L   | 293  | 447  | 10.2476113141 |
| NM_001029885 | GLTPD1 879  | 955  |      | 8.52061081056 |
| NM_001029885 | GLTPD1 1159 | 1229 |      | 10.1095841804 |
| NM_001029882 | AHDC1 6231  | 6275 |      | 10.8091612487 |
| NM_032557    | USP38 2083  | 2137 |      | 10.5823371775 |
| NM_032557    | USP38 1454  | 1511 |      | 8.57832630841 |
| NM_032551    | KISS1R 221  | 297  |      | 12.3246038024 |
| NM_032551    | KISS1R 362  | 453  |      | 13.0615693966 |
| NM_032551    | KISS1R 1051 | 1112 |      | 12.7396413015 |
| NM_032551    | KISS1R 647  | 681  |      | 11.6555020923 |
| NM_032551    | KISS1R 522  | 607  |      | 12.7396413017 |
| NM_032551    | KISS1R 300  | 358  |      | 10.7396413017 |
| NM_032551    | KISS1R 1376 | 1518 |      | 14.3246038024 |
| NM_199250    | C19orf48    | 784  | 881  | 7.60993019111 |
| NM_199250    | C19orf48    | 508  | 582  | 7.60591259094 |
| NM_199250    | C19orf48    | 312  | 393  | 6.60975644079 |
| NM_199250    | C19orf48    | 1006 | 1075 | 6.60591259094 |
| NM_199250    | C19orf48    | 590  | 633  | 7.52579098173 |
| NM_032558    | HIATL1 595  | 652  |      | 8.0122462538  |
| NM_032558    | HIATL1 2895 | 2942 |      | 7.01224601788 |
| NM_032558    | HIATL1 1848 | 1886 |      | 7.59703500421 |
| NM_032558    | HIATL1 1562 | 1622 |      | 8.33417411277 |
| NM_032558    | HIATL1 2355 | 2419 |      | 6.01223952275 |
| NM_032558    | HIATL1 2602 | 2650 |      | 7.59703500421 |
| NM_032558    | HIATL1 656  | 767  |      | 9.91913684941 |
| NM_032558    | HIATL1 1345 | 1392 |      | 7.59319115435 |
| NM_032558    | HIATL1 2034 | 2070 |      | 6.00822865363 |
| NM_032558    | HIATL1 903  | 978  |      | 8.81960117586 |
| NM_032558    | HIATL1 985  | 1086 |      | 9.33417434869 |
| NM_032558    | HIATL1 16   | 105  |      | 8.81960117586 |
| NM_032558    | HIATL1 397  | 488  |      | 9.0122462538  |
| NM_032558    | HIATL1 1679 | 1827 |      | 8.0122462538  |
| NM_032558    | HIATL1 518  | 592  |      | 7.59720875452 |
| NM_032558    | HIATL1 849  | 903  |      | 7.59720875452 |
| NM_032558    | HIATL1 2171 | 2268 |      | 8.59720875452 |
| NM_032558    | HIATL1 1088 | 1326 |      | 10.6561024436 |
| NM_032558    | HIATL1 2732 | 2843 |      | 9.18217125524 |
| NM_032558    | HIATL1 1392 | 1551 |      | 9.0122462538  |
| NM_006145    | DNAJB1 770  | 820  |      | 5.48890195083 |
| NM_006145    | DNAJB1 713  | 763  |      | 4.90778329997 |
| NM_006145    | DNAJB1 1237 | 1279 |      | 3.90393945011 |
| NM_006145    | DNAJB1 1563 | 1618 |      | 6.22988514517 |
| NM_006145    | DNAJB1 1840 | 1891 |      | 3.90393945011 |
| NM_006145    | DNAJB1 1447 | 1562 |      | 7.60839676842 |
| NM_006145    | DNAJB1 1099 | 1231 |      | 5.90795705028 |
| NM_006145    | DNAJB1 522  | 622  |      | 5.49291954346 |

|              |         |      |      |               |
|--------------|---------|------|------|---------------|
| NM_144609    | CCDC43  | 1413 | 1467 | 4.9787078514  |
| NM_003461    | ZYX     | 167  | 226  | 8.49544101108 |
| NM_003461    | ZYX     | 417  | 492  | 7.49544100353 |
| NM_003461    | ZYX     | 929  | 992  | 8.23240660525 |
| NM_003461    | ZYX     | 567  | 685  | 9.71783343242 |
| NM_003461    | ZYX     | 2131 | 2186 | 5.91047851014 |
| NM_003461    | ZYX     | 1207 | 1328 | 8.91047851036 |
| NM_003461    | ZYX     | 845  | 904  | 6.91047850281 |
| NM_003461    | ZYX     | 1558 | 1951 | 10.6653660125 |
| NM_005581    | BCAM    | 985  | 1038 | 4.00443592949 |
| NM_005581    | BCAM    | 1569 | 1634 | 4.00443616518 |
| NM_005581    | BCAM    | 532  | 615  | 4.58939866612 |
| NM_005581    | BCAM    | 2271 | 2362 | 4.58939866613 |
| NM_005581    | BCAM    | 184  | 241  | 4.58939866613 |
| NM_005581    | BCAM    | 1245 | 1289 | 4.00442943435 |
| NM_005581    | BCAM    | 1118 | 1202 | 5.0044361654  |
| NM_005581    | BCAM    | 1913 | 1987 | 4.00426241509 |
| NM_005581    | BCAM    | 1056 | 1116 | 4.00443615786 |
| NM_080605    | B3GALT6 | 745  | 782  | 10.5479217674 |
| NM_080605    | B3GALT6 | 1504 | 1575 | 10.5479284909 |
| NM_080605    | B3GALT6 | 816  | 883  | 8.96295926668 |
| NM_080605    | B3GALT6 | 444  | 524  | 8.96296599773 |
| NM_080605    | B3GALT6 | 1285 | 1492 | 11.5479284985 |
| NM_006635    | ZNF460  | 693  | 758  | 9.82170108102 |
| NM_006635    | ZNF460  | 2099 | 2191 | 11.4064900673 |
| NM_006635    | ZNF460  | 3181 | 3220 | 9.81768371676 |
| NM_006635    | ZNF460  | 759  | 820  | 10.8216945859 |
| NM_006635    | ZNF460  | 3101 | 3163 | 9.81768371676 |
| NM_006635    | ZNF460  | 349  | 428  | 9.82170131671 |
| NM_006635    | ZNF460  | 1418 | 1490 | 11.4064900673 |
| NM_006635    | ZNF460  | 431  | 522  | 10.8217013169 |
| NM_006635    | ZNF460  | 2803 | 2948 | 11.8217013169 |
| NM_006635    | ZNF460  | 2698 | 2765 | 11.4066638101 |
| NM_006635    | ZNF460  | 3437 | 3582 | 11.4066638177 |
| NM_006635    | ZNF460  | 3753 | 3848 | 9.82170131693 |
| NM_005588    | MEP1A   | 2378 | 2468 | 8.70632318911 |
| NM_005588    | MEP1A   | 822  | 883  | 9.29111193951 |
| NM_005588    | MEP1A   | 405  | 481  | 8.70632318911 |
| NM_005588    | MEP1A   | 1697 | 1759 | 8.70632318156 |
| NM_005588    | MEP1A   | 690  | 782  | 7.70631645806 |
| NM_001145438 | PGAP2   | 876  | 931  | 10.6286871207 |
| NM_001145438 | PGAP2   | 738  | 798  | 11.8512532923 |
| NM_001145438 | PGAP2   | 644  | 689  | 10.0398807701 |
| NM_001145438 | PGAP2   | 517  | 592  | 10.0437246199 |
| NM_001145438 | PGAP2   | 264  | 339  | 10.628860871  |
| NM_001145438 | PGAP2   | 414  | 466  | 9.04389836271 |
| NM_015308    | FNBP4   | 3393 | 3439 | 4.95039584288 |
| NM_015308    | FNBP4   | 3830 | 3891 | 6.27232393799 |
| NM_015308    | FNBP4   | 3471 | 3532 | 5.5353583436  |
| NM_015308    | FNBP4   | 2211 | 2280 | 5.95038911205 |

|           |        |      |      |               |
|-----------|--------|------|------|---------------|
| NM_015308 | FNBP4  | 821  | 874  | 5.53134074365 |
| NM_015308 | FNBP4  | 3622 | 3776 | 5.53535834382 |
| NM_015308 | FNBP4  | 486  | 524  | 3.94637824293 |
| NM_015308 | FNBP4  | 1695 | 1764 | 5.53134074365 |
| NM_015308 | FNBP4  | 400  | 447  | 3.86625663372 |
| NM_015308 | FNBP4  | 3952 | 4081 | 6.53535834382 |
| NM_018269 | ADI1   | 652  | 714  | 6.25190472045 |
| NM_018269 | ADI1   | 926  | 969  | 4.66694871486 |
| NM_018269 | ADI1   | 182  | 303  | 6.98887704567 |
| NM_018269 | ADI1   | 341  | 467  | 6.25191145128 |
| NM_018269 | ADI1   | 750  | 891  | 7.98887704567 |
| NM_015306 | USP24  | 3899 | 3974 | 7.33219872818 |
| NM_015306 | USP24  | 2388 | 2462 | 6.33219896388 |
| NM_015306 | USP24  | 3067 | 3101 | 5.24805975472 |
| NM_015306 | USP24  | 4264 | 4311 | 5.32818136393 |
| NM_015306 | USP24  | 9377 | 9416 | 5.32818136393 |
| NM_015306 | USP24  | 1074 | 1117 | 6.24805975472 |
| NM_015306 | USP24  | 4895 | 4949 | 5.32818136393 |
| NM_015306 | USP24  | 7141 | 7179 | 5.24805975472 |
| NM_015306 | USP24  | 1268 | 1320 | 5.32818136393 |
| NM_015306 | USP24  | 3703 | 3775 | 6.91716146482 |
| NM_015306 | USP24  | 1614 | 1690 | 6.91314386465 |
| NM_015306 | USP24  | 1855 | 1949 | 6.33219872818 |
| NM_015306 | USP24  | 5498 | 5586 | 6.91716146482 |
| NM_015306 | USP24  | 6359 | 6464 | 6.33219896388 |
| NM_018264 | TYW1   | 3093 | 3140 | 9.34057920387 |
| NM_018264 | TYW1   | 2250 | 2292 | 7.34057920387 |
| NM_018264 | TYW1   | 2834 | 2897 | 7.34057920387 |
| NM_018264 | TYW1   | 1430 | 1511 | 7.34459007299 |
| NM_018264 | TYW1   | 1102 | 1149 | 7.34057920387 |
| NM_018264 | TYW1   | 1179 | 1228 | 7.34057920387 |
| NM_018264 | TYW1   | 750  | 793  | 7.3445967965  |
| NM_018264 | TYW1   | 384  | 437  | 8.92955906885 |
| NM_018264 | TYW1   | 1769 | 1848 | 8.34459680405 |
| NM_018264 | TYW1   | 679  | 733  | 9.66635114862 |
| NM_018264 | TYW1   | 238  | 337  | 8.92955930477 |
| NM_018264 | TYW1   | 1576 | 1633 | 8.34057920387 |
| NM_018264 | TYW1   | 519  | 635  | 9.66652489893 |
| NM_018264 | TYW1   | 94   | 175  | 9.66652489871 |
| NM_018264 | TYW1   | 2304 | 2458 | 10.1519517261 |
| NM_018264 | TYW1   | 946  | 1021 | 8.34459007299 |
| NM_018264 | TYW1   | 1868 | 1999 | 9.34459680405 |
| NM_018264 | TYW1   | 2105 | 2245 | 9.66652489893 |
| NM_015305 | ANGEL1 | 1079 | 1120 | 8.78559689899 |
| NM_015305 | ANGEL1 | 2477 | 2542 | 9.78961449916 |
| NM_015305 | ANGEL1 | 3835 | 3894 | 10.7894407488 |
| NM_015305 | ANGEL1 | 1680 | 1719 | 9.70547528978 |
| NM_015305 | ANGEL1 | 555  | 636  | 10.3745702688 |
| NM_015305 | ANGEL1 | 2255 | 2326 | 9.78961449895 |
| NM_015305 | ANGEL1 | 1941 | 2114 | 11.3745769999 |

|              |       |      |      |                |
|--------------|-------|------|------|----------------|
| NM_015302    | HAUS5 | 3264 | 3350 | 6.99314494487  |
| NM_001164754 | ASPH  | 1638 | 1689 | 1.90943681614  |
| NM_001164754 | ASPH  | 2032 | 2141 | 3.49439931686  |
| NM_001164754 | ASPH  | 2572 | 2620 | 2.49439908094  |
| NM_001164754 | ASPH  | 2150 | 2253 | 2.90943681614  |
| NM_001164754 | ASPH  | 1196 | 1318 | 4.49439931686  |
| NM_001164754 | ASPH  | 2460 | 2570 | 3.49439931686  |
| NM_001164754 | ASPH  | 373  | 1132 | 7.49439931686  |
| NM_001164754 | ASPH  | 1887 | 1985 | 2.90943681614  |
| NM_001164754 | ASPH  | 1352 | 1604 | 5.36886843477  |
| NM_001164754 | ASPH  | 2629 | 2793 | 4.36886843477  |
| NM_001164754 | ASPH  | 99   | 156  | 0.909436816136 |
| NM_001164754 | ASPH  | 2254 | 2373 | 3.23136491102  |
| NM_012302    | LPHN2 | 3397 | 3443 | 9.1218854439   |
| NM_012302    | LPHN2 | 1155 | 1205 | 7.45278373402  |
| NM_012302    | LPHN2 | 113  | 174  | 8.85885103829  |
| NM_012302    | LPHN2 | 3699 | 3730 | 6.53290534323  |
| NM_012302    | LPHN2 | 2739 | 2876 | 9.12188544412  |
| NM_012302    | LPHN2 | 1447 | 1539 | 7.5369229434   |
| NM_012302    | LPHN2 | 4779 | 4862 | 8.5369229434   |
| NM_012302    | LPHN2 | 212  | 277  | 8.12188544412  |
| NM_012302    | LPHN2 | 1342 | 1416 | 8.5369229434   |
| NM_012302    | LPHN2 | 3061 | 3130 | 8.5369229434   |
| NM_012302    | LPHN2 | 719  | 784  | 7.5369229434   |
| NM_012302    | LPHN2 | 4466 | 4520 | 7.53692293585  |
| NM_012302    | LPHN2 | 3779 | 3819 | 7.53692294318  |
| NM_012302    | LPHN2 | 4744 | 4779 | 7.53290534323  |
| NM_012302    | LPHN2 | 1877 | 2094 | 10.1218854441  |
| NM_012302    | LPHN2 | 610  | 711  | 8.12188544412  |
| NM_012302    | LPHN2 | 1636 | 1867 | 9.34427786546  |
| NM_012302    | LPHN2 | 3975 | 4135 | 7.5369229434   |
| NM_012302    | LPHN2 | 2947 | 3019 | 7.53692294318  |
| NM_012302    | LPHN2 | 2393 | 2646 | 10.443813539   |
| NM_012302    | LPHN2 | 2103 | 2310 | 9.70684794485  |
| NM_012302    | LPHN2 | 3275 | 3372 | 8.12188544412  |
| NM_012302    | LPHN2 | 828  | 954  | 8.85885103829  |
| NM_012302    | LPHN2 | 3564 | 3696 | 8.85885103829  |
| NM_012302    | LPHN2 | 347  | 539  | 10.2373626615  |
| NM_012302    | LPHN2 | 4521 | 4573 | 8.12187871307  |
| NM_153747    | PIGC  | 1083 | 1126 | 8.20267877521  |
| NM_153747    | PIGC  | 426  | 481  | 10.2026785393  |
| NM_153747    | PIGC  | 1018 | 1082 | 9.19866117503  |
| NM_153747    | PIGC  | 860  | 908  | 9.78746752561  |
| NM_153747    | PIGC  | 86   | 129  | 9.11853956582  |
| NM_153747    | PIGC  | 383  | 426  | 9.78746752561  |
| NM_153747    | PIGC  | 1384 | 1444 | 8.20267877521  |
| NM_153747    | PIGC  | 248  | 328  | 10.2026787752  |
| NM_153747    | PIGC  | 558  | 623  | 9.2026787752   |
| NM_012308    | KDM2A | 4981 | 5033 | 6.7733894302   |
| NM_012308    | KDM2A | 2104 | 2191 | 8.35835193093  |

|           |        |      |      |               |
|-----------|--------|------|------|---------------|
| NM_012308 | KDM2A  | 2883 | 2960 | 5.77338943021 |
| NM_012308 | KDM2A  | 842  | 902  | 6.77338942998 |
| NM_012308 | KDM2A  | 7116 | 7173 | 6.77338943021 |
| NM_012308 | KDM2A  | 4279 | 4371 | 5.77338943021 |
| NM_012308 | KDM2A  | 616  | 685  | 8.35835193093 |
| NM_012308 | KDM2A  | 2029 | 2102 | 8.35835193093 |
| NM_012308 | KDM2A  | 569  | 606  | 6.68925022082 |
| NM_012308 | KDM2A  | 1847 | 1907 | 8.09531752509 |
| NM_012308 | KDM2A  | 6570 | 6620 | 5.68925022082 |
| NM_012308 | KDM2A  | 4424 | 4474 | 6.77338942266 |
| NM_012308 | KDM2A  | 942  | 1008 | 7.35835193093 |
| NM_012308 | KDM2A  | 1645 | 1754 | 8.77338943021 |
| NM_012308 | KDM2A  | 1583 | 1628 | 6.77321567989 |
| NM_012308 | KDM2A  | 1978 | 2021 | 5.77338919429 |
| NM_012308 | KDM2A  | 5039 | 5094 | 7.77338943021 |
| NM_012308 | KDM2A  | 1779 | 1838 | 8.09531752509 |
| NM_012308 | KDM2A  | 2191 | 2342 | 8.77338943021 |
| NM_012308 | KDM2A  | 4865 | 4981 | 8.58074435226 |
| NM_012308 | KDM2A  | 4040 | 4227 | 9.68028002581 |
| NM_012308 | KDM2A  | 6413 | 6497 | 7.35835193093 |
| NM_012308 | KDM2A  | 5746 | 5912 | 9.68028002581 |
| NM_012308 | KDM2A  | 5094 | 5213 | 8.58074435226 |
| NM_012308 | KDM2A  | 3852 | 4025 | 9.09531752509 |
| NM_012308 | KDM2A  | 3714 | 3851 | 8.09531752509 |
| NM_012308 | KDM2A  | 1012 | 1212 | 9.23282104884 |
| NM_012308 | KDM2A  | 2515 | 2688 | 8.77338943021 |
| NM_012308 | KDM2A  | 3486 | 3696 | 9.68028002581 |
| NM_012308 | KDM2A  | 6925 | 7048 | 6.77338943021 |
| NM_012308 | KDM2A  | 6647 | 6751 | 7.77338943021 |
| NM_012308 | KDM2A  | 3009 | 3067 | 6.68925022082 |
| NM_012308 | KDM2A  | 4550 | 4664 | 5.77338943021 |
| NM_012308 | KDM2A  | 691  | 800  | 8.58074435226 |
| NM_012308 | KDM2A  | 1347 | 1532 | 9.35835193093 |
| NM_012308 | KDM2A  | 5565 | 5695 | 8.58074435226 |
| NM_012308 | KDM2A  | 3189 | 3368 | 7.77338943021 |
| NM_012308 | KDM2A  | 6060 | 6398 | 10.2969513863 |
| NM_012308 | KDM2A  | 5421 | 5504 | 7.77338943021 |
| NM_012308 | KDM2A  | 2751 | 2881 | 9.09531752509 |
| NM_024075 | TSEN34 | 1095 | 1180 | 7.50535641832 |
| NM_024075 | TSEN34 | 1012 | 1071 | 7.50535665402 |
| NM_024075 | TSEN34 | 335  | 445  | 8.09031915496 |
| NM_024075 | TSEN34 | 858  | 921  | 7.50518290393 |
| NM_024075 | TSEN34 | 1182 | 1283 | 9.3127115763  |
| NM_024075 | TSEN34 | 1290 | 1398 | 8.09031915496 |
| NM_005729 | PPIF   | 950  | 1025 | 4.94074698539 |
| NM_005729 | PPIF   | 437  | 508  | 4.9407469854  |
| NM_005729 | PPIF   | 1573 | 1685 | 5.67771257957 |
| NM_005729 | PPIF   | 823  | 930  | 5.35578448468 |
| NM_005729 | PPIF   | 23   | 78   | 4.35578447713 |
| NM_005729 | PPIF   | 1117 | 1188 | 4.9407469854  |

|           |         |      |      |               |
|-----------|---------|------|------|---------------|
| NM_005729 | PPIF    | 266  | 366  | 5.35578448468 |
| NM_005729 | PPIF    | 1495 | 1560 | 3.35176688451 |
| NM_005729 | PPIF    | 532  | 714  | 6.16313940674 |
| NM_005729 | PPIF    | 1225 | 1361 | 6.16313940674 |
| NM_005729 | PPIF    | 1873 | 2030 | 6.35578448468 |
| NM_005729 | PPIF    | 1371 | 1479 | 4.9407469854  |
| NM_005729 | PPIF    | 188  | 255  | 4.35578448468 |
| NM_000117 | EMD     | 254  | 352  | 7.36514800098 |
| NM_000117 | EMD     | 456  | 553  | 6.36514800098 |
| NM_000117 | EMD     | 631  | 736  | 6.95011049415 |
| NM_000117 | EMD     | 389  | 456  | 6.95010377064 |
| NM_014437 | SLC39A1 | 2158 | 2193 | 8.65334065895 |
| NM_014437 | SLC39A1 | 2341 | 2425 | 10.2383031597 |
| NM_014437 | SLC39A1 | 1001 | 1133 | 10.1127722776 |
| NM_014437 | SLC39A1 | 1526 | 1651 | 8.65334065896 |
| NM_014437 | SLC39A1 | 2199 | 2294 | 9.23830315968 |
| NM_014437 | SLC39A1 | 1134 | 1402 | 11.8627940246 |
| NM_014437 | SLC39A1 | 1662 | 1872 | 10.7408035002 |
| NM_014437 | SLC39A1 | 1410 | 1523 | 8.65334065896 |
| NM_014437 | SLC39A1 | 1881 | 2157 | 11.1127722776 |
| NM_014437 | SLC39A1 | 529  | 970  | 11.7826236759 |
| NM_005720 | ARPC1B  | 1147 | 1253 | 8.03353485767 |
| NM_005720 | ARPC1B  | 1295 | 1341 | 7.03353485767 |
| NM_005720 | ARPC1B  | 150  | 198  | 6.71160676278 |
| NM_005720 | ARPC1B  | 905  | 1091 | 7.88153176423 |
| NM_005720 | ARPC1B  | 223  | 370  | 7.71160676278 |
| NM_005720 | ARPC1B  | 702  | 878  | 7.29656926351 |
| NM_005720 | ARPC1B  | 390  | 662  | 9.17103838142 |
| NM_005051 | QARS    | 2618 | 2652 | 3.70482814925 |
| NM_005051 | QARS    | 807  | 926  | 4.29380824993 |
| NM_005051 | QARS    | 1383 | 1460 | 5.03077384431 |
| NM_005051 | QARS    | 373  | 444  | 5.03077384431 |
| NM_005051 | QARS    | 685  | 738  | 3.70884551351 |
| NM_005051 | QARS    | 1142 | 1227 | 3.70884574942 |
| NM_005051 | QARS    | 2358 | 2410 | 4.29380825015 |
| NM_005051 | QARS    | 1690 | 1842 | 6.29380825015 |
| NM_005051 | QARS    | 2675 | 2732 | 3.70482814925 |
| NM_005051 | QARS    | 971  | 1049 | 3.70884574943 |
| NM_005051 | QARS    | 1576 | 1663 | 4.70884574943 |
| NM_005051 | QARS    | 2048 | 2086 | 2.70482814925 |
| NM_005051 | QARS    | 2446 | 2613 | 5.87877075087 |
| NM_005051 | QARS    | 1845 | 1983 | 3.70884574943 |
| NM_005722 | ACTR2   | 2905 | 2978 | 3.82020753341 |
| NM_005722 | ACTR2   | 3770 | 3859 | 3.23524503269 |
| NM_005722 | ACTR2   | 2238 | 2312 | 3.23524503247 |
| NM_005722 | ACTR2   | 1350 | 1418 | 5.55717312758 |
| NM_005722 | ACTR2   | 1280 | 1350 | 5.23524503269 |
| NM_005722 | ACTR2   | 1810 | 1890 | 4.82020753341 |
| NM_005722 | ACTR2   | 2657 | 2757 | 4.23524503269 |
| NM_005722 | ACTR2   | 3000 | 3153 | 5.23524503269 |

|              |        |      |      |               |
|--------------|--------|------|------|---------------|
| NM_005722    | ACTR2  | 3487 | 3628 | 4.55717312758 |
| NM_005722    | ACTR2  | 1982 | 2047 | 4.23524503269 |
| NM_005722    | ACTR2  | 3169 | 3353 | 4.23524503269 |
| NM_005722    | ACTR2  | 2056 | 2142 | 2.23524479677 |
| NM_005722    | ACTR2  | 1421 | 1599 | 6.55717312758 |
| NM_005722    | ACTR2  | 332  | 779  | 7.87910122247 |
| NM_005722    | ACTR2  | 140  | 326  | 6.40517003414 |
| NM_005722    | ACTR2  | 2418 | 2638 | 6.1421356283  |
| NM_005722    | ACTR2  | 1602 | 1730 | 5.40517003414 |
| NM_005722    | ACTR2  | 1899 | 1970 | 2.23523830164 |
| NM_005722    | ACTR2  | 782  | 1267 | 8.04259995475 |
| NM_005724    | TSPAN3 | 1370 | 1441 | 4.62250622228 |
| NM_005724    | TSPAN3 | 302  | 371  | 5.207468723   |
| NM_005724    | TSPAN3 | 1170 | 1365 | 8.26636241205 |
| NM_005724    | TSPAN3 | 1485 | 1839 | 8.79243122372 |
| NM_005724    | TSPAN3 | 880  | 1169 | 9.04877097698 |
| NM_005724    | TSPAN3 | 813  | 880  | 5.62250622228 |
| NM_005724    | TSPAN3 | 371  | 808  | 9.45539623644 |
| NM_005727    | TSPAN1 | 912  | 959  | 10.2764936181 |
| NM_005727    | TSPAN1 | 404  | 481  | 9.27649361807 |
| NM_005054    | RGPD5  | 2052 | 2124 | 8.8313169853  |
| NM_005054    | RGPD5  | 702  | 748  | 8.41627947847 |
| NM_005054    | RGPD5  | 1951 | 2036 | 6.83131698508 |
| NM_005054    | RGPD5  | 2605 | 2638 | 8.41627275497 |
| NM_005054    | RGPD5  | 4060 | 4140 | 6.82729938513 |
| NM_005054    | RGPD5  | 3607 | 3692 | 6.8313169853  |
| NM_005054    | RGPD5  | 3520 | 3593 | 6.82729938513 |
| NM_005054    | RGPD5  | 518  | 639  | 9.15324508019 |
| NM_005054    | RGPD5  | 1066 | 1145 | 8.41627948602 |
| NM_005054    | RGPD5  | 1236 | 1321 | 9.15324508019 |
| NM_005054    | RGPD5  | 4328 | 4455 | 6.8313169853  |
| NM_001013843 | SLTM   | 3380 | 3428 | 5.16041388747 |
| NM_001013843 | SLTM   | 3467 | 3517 | 3.16041388747 |
| NM_001013843 | SLTM   | 3100 | 3257 | 4.74939398837 |
| NM_001005367 | TTYH1  | 298  | 348  | 8.88928760292 |
| NM_001005367 | TTYH1  | 769  | 829  | 8.80514862945 |
| NM_018082    | POLR3B | 3362 | 3452 | 7.05097897435 |
| NM_018083    | ZNF358 | 1625 | 1680 | 9.02964912993 |
| NM_018083    | ZNF358 | 267  | 325  | 9.02563153731 |
| NM_018081    | WRAP53 | 1168 | 1212 | 7.90270769906 |
| NM_018081    | WRAP53 | 796  | 891  | 10.2246357942 |
| NM_018081    | WRAP53 | 1459 | 1536 | 7.90270746336 |
| NM_018081    | WRAP53 | 1665 | 1718 | 8.90253394897 |
| NM_018086    | FIGN   | 3959 | 3994 | 8.89723533265 |
| NM_018087    | TMEM48 | 1645 | 1701 | 9.45910483801 |
| NM_018087    | TMEM48 | 419  | 524  | 9.45910483801 |
| NM_018087    | TMEM48 | 3971 | 4056 | 7.87414232974 |
| NM_018087    | TMEM48 | 1524 | 1576 | 6.87012473712 |
| NM_018087    | TMEM48 | 1464 | 1521 | 6.87396858697 |
| NM_018087    | TMEM48 | 3771 | 3817 | 6.79000312791 |

|              |        |      |      |               |
|--------------|--------|------|------|---------------|
| NM_018087    | TMEM48 | 1268 | 1325 | 8.45910483801 |
| NM_018087    | TMEM48 | 1940 | 2037 | 10.0440673387 |
| NM_018087    | TMEM48 | 335  | 397  | 8.87414233729 |
| NM_018087    | TMEM48 | 1722 | 1915 | 10.5745820554 |
| NM_018087    | TMEM48 | 2338 | 2461 | 9.68149725935 |
| NM_018087    | TMEM48 | 3322 | 3433 | 7.87414233728 |
| NM_018087    | TMEM48 | 528  | 689  | 10.0440673387 |
| NM_018087    | TMEM48 | 2132 | 2279 | 10.0440673387 |
| NM_018087    | TMEM48 | 1062 | 1238 | 11.0440673387 |
| NM_018087    | TMEM48 | 693  | 875  | 10.5745820554 |
| NM_018087    | TMEM48 | 1325 | 1452 | 9.45910483801 |
| NM_018087    | TMEM48 | 3880 | 3964 | 8.87414210137 |
| NM_018087    | TMEM48 | 886  | 1049 | 10.5745820554 |
| NM_001172335 | PLS3   | 1811 | 1949 | 6.1427503649  |
| NM_001172335 | PLS3   | 200  | 280  | 5.92035794357 |
| NM_001172335 | PLS3   | 133  | 197  | 5.92035794357 |
| NM_001172335 | PLS3   | 1663 | 1781 | 5.92035794357 |
| NM_001172335 | PLS3   | 971  | 1070 | 5.33539544285 |
| NM_001172335 | PLS3   | 340  | 400  | 5.33539544285 |
| NM_001172335 | PLS3   | 1089 | 1124 | 3.33137784267 |
| NM_001172335 | PLS3   | 2402 | 2471 | 4.33539544285 |
| NM_001172335 | PLS3   | 1130 | 1175 | 3.33137784267 |
| NM_001172335 | PLS3   | 443  | 580  | 6.79482706148 |
| NM_001172335 | PLS3   | 2956 | 3037 | 3.33539544284 |
| NM_001172335 | PLS3   | 2188 | 2341 | 7.1427503649  |
| NM_001172335 | PLS3   | 2733 | 2854 | 4.92035794357 |
| NM_001172335 | PLS3   | 1475 | 1659 | 7.03583516099 |
| NM_001172335 | PLS3   | 2118 | 2173 | 3.33137784267 |
| NM_001172335 | PLS3   | 1997 | 2093 | 6.33539544285 |
| NM_001172335 | PLS3   | 1183 | 1463 | 7.50532044429 |
| NM_001172335 | PLS3   | 612  | 954  | 7.65732353773 |
| NM_018085    | IP09   | 1625 | 1693 | 7.20244796246 |
| NM_018085    | IP09   | 692  | 743  | 5.61748546152 |
| NM_018085    | IP09   | 3046 | 3110 | 6.61346786157 |
| NM_018085    | IP09   | 2028 | 2109 | 7.20244796246 |
| NM_018085    | IP09   | 358  | 422  | 7.20244772654 |
| NM_018085    | IP09   | 2934 | 3035 | 8.61748546174 |
| NM_018085    | IP09   | 2745 | 2832 | 5.61748546174 |
| NM_018085    | IP09   | 526  | 589  | 6.61747873069 |
| NM_018085    | IP09   | 1155 | 1297 | 8.61748546174 |
| NM_018085    | IP09   | 1335 | 1389 | 5.61731171142 |
| NM_018085    | IP09   | 1886 | 2022 | 8.78741046318 |
| NM_018085    | IP09   | 627  | 684  | 6.61748546174 |
| NM_018085    | IP09   | 944  | 1083 | 8.78741046318 |
| NM_018085    | IP09   | 1484 | 1583 | 7.61748546174 |
| NM_018085    | IP09   | 3318 | 3463 | 8.20244796246 |
| NM_018085    | IP09   | 2191 | 2346 | 6.61748546174 |
| NM_018085    | IP09   | 162  | 354  | 9.20244796246 |
| NM_018085    | IP09   | 2421 | 2654 | 8.61748546174 |
| NM_018085    | IP09   | 1791 | 1853 | 7.93941355663 |



|           |         |      |      |               |
|-----------|---------|------|------|---------------|
| NM_018085 | IP09    | 3571 | 3664 | 5.61748522582 |
| NM_018085 | IP09    | 2842 | 2932 | 5.61748546174 |
| NM_130445 | COL18A1 | 1426 | 1507 | 6.68340759634 |
| NM_130445 | COL18A1 | 287  | 347  | 7.68340759634 |
| NM_130445 | COL18A1 | 220  | 281  | 6.09844509562 |
| NM_130445 | COL18A1 | 3881 | 3940 | 6.09844509562 |
| NM_130445 | COL18A1 | 503  | 601  | 6.68340759634 |
| NM_130445 | COL18A1 | 4330 | 4410 | 6.09844509562 |
| NM_130445 | COL18A1 | 4151 | 4209 | 7.09844509562 |
| NM_130445 | COL18A1 | 2160 | 2225 | 6.09844509562 |
| NM_130445 | COL18A1 | 3169 | 3247 | 6.09843836456 |
| NM_130445 | COL18A1 | 3253 | 3321 | 6.0982713453  |
| NM_130445 | COL18A1 | 2449 | 2532 | 6.68340759634 |
| NM_130445 | COL18A1 | 2732 | 2816 | 6.09844509562 |
| NM_130445 | COL18A1 | 145  | 209  | 5.09843836456 |
| NM_130445 | COL18A1 | 4002 | 4102 | 7.09844509562 |
| NM_130445 | COL18A1 | 3642 | 3846 | 7.68340759634 |
| NM_130445 | COL18A1 | 356  | 478  | 6.68340759634 |
| NM_130445 | COL18A1 | 877  | 1020 | 7.09844509562 |
| NM_130445 | COL18A1 | 613  | 828  | 7.90580001768 |
| NM_001802 | CDR2    | 510  | 572  | 4.34013661126 |
| NM_001802 | CDR2    | 1644 | 1685 | 4.34013638289 |
| NM_001802 | CDR2    | 609  | 679  | 3.75516738704 |
| NM_001802 | CDR2    | 2172 | 2249 | 3.75517388217 |
| NM_001802 | CDR2    | 780  | 859  | 2.75115651792 |
| NM_130440 | PTPRF   | 7565 | 7614 | 6.79104657849 |
| NM_130440 | PTPRF   | 6284 | 6325 | 4.46894473328 |
| NM_130440 | PTPRF   | 1461 | 1529 | 5.46510088343 |
| NM_130440 | PTPRF   | 2659 | 2727 | 6.4691184836  |
| NM_130440 | PTPRF   | 5908 | 6041 | 7.05408098432 |
| NM_130440 | PTPRF   | 6102 | 6153 | 6.05408098432 |
| NM_130440 | PTPRF   | 3715 | 3851 | 7.05408098432 |
| NM_130440 | PTPRF   | 812  | 924  | 7.27647340566 |
| NM_130440 | PTPRF   | 1333 | 1398 | 6.79104657849 |
| NM_130440 | PTPRF   | 2254 | 2401 | 6.79104657849 |
| NM_130440 | PTPRF   | 7453 | 7496 | 5.46510088343 |
| NM_130440 | PTPRF   | 6175 | 6225 | 6.05408098431 |
| NM_130440 | PTPRF   | 2774 | 2896 | 7.05408098432 |
| NM_130440 | PTPRF   | 3617 | 3693 | 6.79104657849 |
| NM_130440 | PTPRF   | 6625 | 6678 | 6.05408098432 |
| NM_130440 | PTPRF   | 5208 | 5254 | 5.46911824768 |
| NM_130440 | PTPRF   | 5581 | 5634 | 7.05408098432 |
| NM_130440 | PTPRF   | 7049 | 7139 | 5.4691184836  |
| NM_130440 | PTPRF   | 7273 | 7370 | 7.05408098432 |
| NM_130440 | PTPRF   | 3356 | 3586 | 8.71704599704 |
| NM_130440 | PTPRF   | 5265 | 5433 | 7.92855010224 |
| NM_130440 | PTPRF   | 2906 | 3078 | 8.27647340566 |
| NM_130440 | PTPRF   | 267  | 421  | 8.05408098432 |
| NM_130440 | PTPRF   | 3175 | 3226 | 5.4691184836  |
| NM_130440 | PTPRF   | 1659 | 1768 | 5.4691184836  |

|              |        |      |      |                 |
|--------------|--------|------|------|-----------------|
| NM_130440    | PTPRF  | 6467 | 6610 | 7.63904348504   |
| NM_130440    | PTPRF  | 4401 | 4511 | 7.05408098432   |
| NM_130440    | PTPRF  | 58   | 165  | 4.46911848359   |
| NM_130440    | PTPRF  | 1849 | 2105 | 8.4691184836    |
| NM_130440    | PTPRF  | 421  | 495  | 4.4691184836    |
| NM_130440    | PTPRF  | 3866 | 4281 | 9.16955820174   |
| NM_130440    | PTPRF  | 593  | 699  | 6.05408098432   |
| NM_130440    | PTPRF  | 5653 | 5896 | 8.27647340566   |
| NM_130440    | PTPRF  | 4973 | 5134 | 7.79104657849   |
| NM_130440    | PTPRF  | 2489 | 2652 | 7.27647340566   |
| NM_130440    | PTPRF  | 1067 | 1328 | 8.4691184836    |
| NM_130440    | PTPRF  | 941  | 1047 | 5.46911848359   |
| NM_130440    | PTPRF  | 5437 | 5570 | 6.05408098432   |
| NM_130440    | PTPRF  | 4573 | 4809 | 7.4691184836    |
| NM_130440    | PTPRF  | 4287 | 4398 | 6.4691184836    |
| NM_130440    | PTPRF  | 6343 | 6466 | 6.79104657849   |
| NM_001779    | CD58   | 221  | 253  | 9.42878095839   |
| NM_001779    | CD58   | 292  | 344  | 10.1697641525   |
| NM_001779    | CD58   | 416  | 506  | 7.84783605784   |
| NM_001779    | CD58   | 561  | 653  | 9.84783605784   |
| NM_001779    | CD58   | 835  | 905  | 9.84381845767   |
| NM_001809    | CENPA  | 577  | 638  | 8.27813048891   |
| NM_022461    | AZI2   | 507  | 573  | 5.23441467509   |
| NM_022460    | HS1BP3 | 934  | 998  | 7.60227950287   |
| NM_022463    | NXN    | 743  | 790  | 8.6798822998    |
| NM_022463    | NXN    | 350  | 454  | 7.09508681835   |
| NM_022463    | NXN    | 1242 | 1286 | 7.09107594923   |
| NM_022463    | NXN    | 90   | 200  | 8.09508681835   |
| NM_022465    | IKZF4  | 364  | 393  | 9.87950060423   |
| NM_001037738 | NPM1   | 1273 | 1336 | -2.23487422933  |
| NM_001037738 | NPM1   | 1198 | 1256 | -0.234874229326 |
| NM_001037738 | NPM1   | 1085 | 1159 | 0.0870538655613 |
| NM_001037738 | NPM1   | 702  | 992  | 2.57248069273   |
| NM_001037738 | NPM1   | 152  | 698  | 3.59801578484   |
| NM_021128    | POLR2L | 137  | 201  | 4.72154392605   |
| NM_021128    | POLR2L | 212  | 306  | 5.72154392605   |
| NM_021128    | POLR2L | 11   | 107  | 7.52889884811   |
| NM_182692    | SRPK2  | 18   | 49   | 5.32534319446   |
| NM_182692    | SRPK2  | 2263 | 2325 | 5.32551693722   |
| NM_182692    | SRPK2  | 1864 | 1946 | 6.91047920958   |
| NM_182692    | SRPK2  | 299  | 344  | 5.32551021372   |
| NM_182692    | SRPK2  | 2340 | 2451 | 6.32551694477   |
| NM_001520    | GTF3C1 | 2359 | 2447 | 8.03766753665   |
| NM_001520    | GTF3C1 | 2292 | 2356 | 6.71573944176   |
| NM_001520    | GTF3C1 | 6973 | 7047 | 5.71573944176   |
| NM_001520    | GTF3C1 | 6677 | 6735 | 7.30070194248   |
| NM_001520    | GTF3C1 | 2547 | 2619 | 7.30070193493   |
| NM_001520    | GTF3C1 | 667  | 713  | 7.71573944154   |
| NM_001520    | GTF3C1 | 6509 | 6576 | 7.30070194248   |
| NM_001520    | GTF3C1 | 40   | 131  | 5.71573944176   |

|              |        |      |      |               |
|--------------|--------|------|------|---------------|
| NM_001520    | GTF3C1 | 3128 | 3176 | 7.71573271071 |
| NM_001520    | GTF3C1 | 3404 | 3519 | 7.30070194248 |
| NM_001520    | GTF3C1 | 5466 | 5525 | 5.71573943421 |
| NM_001520    | GTF3C1 | 4062 | 4118 | 8.30070194248 |
| NM_001520    | GTF3C1 | 6278 | 6391 | 8.03766753665 |
| NM_001520    | GTF3C1 | 4738 | 4843 | 8.30070194248 |
| NM_001520    | GTF3C1 | 2915 | 3017 | 9.03766753665 |
| NM_001520    | GTF3C1 | 5635 | 5679 | 5.63160023238 |
| NM_001520    | GTF3C1 | 4259 | 4362 | 5.71573944176 |
| NM_001520    | GTF3C1 | 3912 | 4036 | 8.8856644432  |
| NM_001520    | GTF3C1 | 3035 | 3119 | 5.71573944176 |
| NM_001520    | GTF3C1 | 2171 | 2195 | 6.71172184159 |
| NM_001520    | GTF3C1 | 2032 | 2167 | 8.30070194248 |
| NM_001520    | GTF3C1 | 237  | 337  | 8.30070194248 |
| NM_001520    | GTF3C1 | 1182 | 1265 | 6.71573944176 |
| NM_001520    | GTF3C1 | 5408 | 5440 | 5.71556569144 |
| NM_001520    | GTF3C1 | 1269 | 1329 | 5.71573271071 |
| NM_001520    | GTF3C1 | 5210 | 5279 | 5.71573944154 |
| NM_001520    | GTF3C1 | 4562 | 4737 | 8.52309436382 |
| NM_001520    | GTF3C1 | 2666 | 2871 | 8.71573944176 |
| NM_001520    | GTF3C1 | 715  | 909  | 8.71573944176 |
| NM_001520    | GTF3C1 | 6168 | 6230 | 5.71573271071 |
| NM_001520    | GTF3C1 | 5849 | 6023 | 5.71573944176 |
| NM_001520    | GTF3C1 | 3558 | 3653 | 8.30070194248 |
| NM_001520    | GTF3C1 | 1948 | 2012 | 5.71573271071 |
| NM_001520    | GTF3C1 | 919  | 1171 | 8.71573944176 |
| NM_001520    | GTF3C1 | 4846 | 4952 | 6.71573944176 |
| NM_001520    | GTF3C1 | 1751 | 1922 | 8.03766753665 |
| NM_001012994 | SNX30  | 716  | 780  | 6.43259961439 |
| NM_020919    | ALS2   | 5405 | 5463 | 6.59586126741 |
| NM_020919    | ALS2   | 2312 | 2354 | 6.51172878908 |
| NM_020919    | ALS2   | 657  | 728  | 7.59586126741 |
| NM_020918    | GPAM   | 742  | 799  | 5.11292590873 |
| NM_031288    | IN080B | 527  | 593  | 8.77167955082 |
| NM_001116    | ADCY9  | 3334 | 3411 | 7.19340367684 |
| NM_001116    | ADCY9  | 4067 | 4118 | 6.10926446746 |
| NM_001116    | ADCY9  | 3459 | 3548 | 7.19340367684 |
| NM_001116    | ADCY9  | 3993 | 4049 | 6.19340367662 |
| NM_001116    | ADCY9  | 283  | 369  | 8.19340367684 |
| NM_001116    | ADCY9  | 6554 | 6602 | 7.77835944651 |
| NM_001116    | ADCY9  | 2042 | 2115 | 8.77836617756 |
| NM_001116    | ADCY9  | 7107 | 7182 | 7.19322992652 |
| NM_001116    | ADCY9  | 6163 | 6223 | 6.19340367684 |
| NM_001116    | ADCY9  | 4691 | 4718 | 6.10926446746 |
| NM_001116    | ADCY9  | 4905 | 4956 | 7.77836617734 |
| NM_001116    | ADCY9  | 1718 | 1758 | 7.18938607667 |
| NM_001116    | ADCY9  | 6405 | 6457 | 7.18938607667 |
| NM_001116    | ADCY9  | 1773 | 1838 | 6.18938607667 |
| NM_001116    | ADCY9  | 3226 | 3306 | 7.77836617756 |
| NM_001116    | ADCY9  | 4187 | 4239 | 7.19339694579 |

|              |        |      |      |               |
|--------------|--------|------|------|---------------|
| NM_001116    | ADCY9  | 1838 | 1928 | 8.19340367684 |
| NM_001116    | ADCY9  | 1228 | 1343 | 9.0007585989  |
| NM_001116    | ADCY9  | 4338 | 4442 | 8.51533177173 |
| NM_001116    | ADCY9  | 7543 | 7647 | 8.51533177173 |
| NM_001116    | ADCY9  | 3591 | 3653 | 6.18938607667 |
| NM_001116    | ADCY9  | 4649 | 4687 | 6.10926446746 |
| NM_001116    | ADCY9  | 5998 | 6108 | 9.19340367684 |
| NM_001116    | ADCY9  | 4978 | 5105 | 9.51533177173 |
| NM_001116    | ADCY9  | 2690 | 2752 | 6.19340367662 |
| NM_001116    | ADCY9  | 7458 | 7521 | 7.19339694579 |
| NM_001116    | ADCY9  | 2383 | 2474 | 7.77836617756 |
| NM_001116    | ADCY9  | 936  | 1149 | 9.89384339498 |
| NM_001116    | ADCY9  | 2147 | 2223 | 8.51533177173 |
| NM_001116    | ADCY9  | 3053 | 3141 | 7.77836594164 |
| NM_001116    | ADCY9  | 3823 | 3871 | 6.10926446746 |
| NM_001116    | ADCY9  | 2784 | 2963 | 9.0007585989  |
| NM_001110    | ADAM10 | 4581 | 4674 | 6.07286447879 |
| NM_001110    | ADAM10 | 3067 | 3114 | 5.3358988844  |
| NM_001110    | ADAM10 | 3151 | 3189 | 3.75093637635 |
| NM_001110    | ADAM10 | 430  | 521  | 5.33589888462 |
| NM_001110    | ADAM10 | 4485 | 4572 | 6.07286447879 |
| NM_001110    | ADAM10 | 3491 | 3546 | 5.75093638389 |
| NM_001110    | ADAM10 | 616  | 650  | 3.66679717451 |
| NM_001110    | ADAM10 | 3792 | 3836 | 5.75093638368 |
| NM_001110    | ADAM10 | 4220 | 4284 | 5.33589888461 |
| NM_001110    | ADAM10 | 4315 | 4480 | 6.92086138534 |
| NM_001110    | ADAM10 | 1913 | 2560 | 10.27449834   |
| NM_001110    | ADAM10 | 526  | 564  | 3.74691878373 |
| NM_001110    | ADAM10 | 249  | 297  | 3.74691878373 |
| NM_001110    | ADAM10 | 2619 | 2708 | 6.07286447879 |
| NM_001110    | ADAM10 | 3395 | 3490 | 6.07286447879 |
| NM_001110    | ADAM10 | 2876 | 3037 | 6.33589888462 |
| NM_001110    | ADAM10 | 690  | 1189 | 9.65782697951 |
| NM_001110    | ADAM10 | 2736 | 2852 | 3.75093638389 |
| NM_001110    | ADAM10 | 3207 | 3341 | 6.55829130596 |
| NM_001110    | ADAM10 | 3588 | 3647 | 3.75093638389 |
| NM_001110    | ADAM10 | 1189 | 1908 | 10.3947925737 |
| NM_001110    | ADAM10 | 4674 | 4780 | 4.75093638389 |
| NM_001110    | ADAM10 | 343  | 422  | 5.33589888462 |
| NM_001146688 | KDM3A  | 360  | 447  | 4.53160947888 |
| NM_001146688 | KDM3A  | 801  | 878  | 4.53144245961 |
| NM_001119    | ADD1   | 2460 | 2495 | 6.13914088177 |
| NM_001119    | ADD1   | 2318 | 2420 | 5.55417838128 |
| NM_001119    | ADD1   | 3343 | 3451 | 6.87610647616 |
| NM_001119    | ADD1   | 136  | 232  | 7.139140882   |
| NM_001119    | ADD1   | 1506 | 1577 | 5.55417838128 |
| NM_001119    | ADD1   | 2035 | 2151 | 6.87610647616 |
| NM_001119    | ADD1   | 789  | 836  | 7.139140882   |
| NM_001119    | ADD1   | 1453 | 1506 | 4.55417814536 |
| NM_001119    | ADD1   | 2737 | 2910 | 8.46106897688 |

|              |                |      |      |               |
|--------------|----------------|------|------|---------------|
| NM_001119    | ADD1           | 1276 | 1429 | 8.01360999991 |
| NM_001119    | ADD1           | 3103 | 3284 | 8.72410338272 |
| NM_001119    | ADD1           | 1136 | 1244 | 7.36153330333 |
| NM_001119    | ADD1           | 3493 | 3543 | 6.13512328182 |
| NM_001119    | ADD1           | 1583 | 1804 | 7.72410338272 |
| NM_001119    | ADD1           | 2630 | 2737 | 6.139140882   |
| NM_001119    | ADD1           | 837  | 955  | 6.139140882   |
| NM_001119    | ADD1           | 3592 | 3779 | 7.87610647616 |
| NM_001119    | ADD1           | 451  | 789  | 9.139140882   |
| NM_001119    | ADD1           | 981  | 1131 | 7.72410338272 |
| NM_001119    | ADD1           | 233  | 425  | 7.55417838128 |
| NM_001119    | ADD1           | 2927 | 3099 | 7.36153330333 |
| NM_016151    | TAOK2          | 1552 | 1623 | 7.3419286837  |
| NM_016151    | TAOK2          | 474  | 513  | 8.33791108375 |
| NM_016151    | TAOK2          | 1072 | 1128 | 6.33791108375 |
| NM_198321    | GALNT10        | 5312 | 5368 | 9.31547179373 |
| NM_198321    | GALNT10        | 1071 | 1134 | 10.3996042721 |
| NM_016154    | RAB4B          | 139  | 213  | 11.102854344  |
| NM_016154    | RAB4B          | 236  | 370  | 10.6878170807 |
| NM_016154    | RAB4B          | 988  | 1065 | 9.10285457996 |
| NM_001033056 | GLUL           | 1346 | 1399 | 2.86813306077 |
| NM_001033056 | GLUL           | 2042 | 2088 | 3.45309555394 |
| NM_001033056 | GLUL           | 1094 | 1162 | 3.45292181117 |
| NM_001033056 | GLUL           | 1023 | 1071 | 3.45309556149 |
| NM_001033056 | GLUL           | 316  | 444  | 5.77502365638 |
| NM_001033056 | GLUL           | 760  | 831  | 1.86813306076 |
| NM_001033056 | GLUL           | 2164 | 2214 | 1.86795931045 |
| NM_001033056 | GLUL           | 722  | 757  | 2.86813282485 |
| NM_001033056 | GLUL           | 1170 | 1284 | 4.45309556149 |
| NM_001033056 | GLUL           | 1403 | 1533 | 4.67548798283 |
| NM_001033056 | GLUL           | 2358 | 2452 | 3.86795931045 |
| NM_001033056 | GLUL           | 448  | 666  | 5.86813306077 |
| NM_001033056 | GLUL           | 841  | 1016 | 6.19006115566 |
| NM_001033056 | GLUL           | 1855 | 1960 | 1.86813306077 |
| NM_022341    | PDF            | 727  | 801  | 8.50580526739 |
| NM_001039583 | PICK1          | 261  | 359  | 6.24529651811 |
| NM_001199535 | TGIF2-C200RF24 | 1023 | 1067 | 8.01368455755 |
| NM_001199535 | TGIF2-C200RF24 | 832  | 1011 | 11.1011473988 |
| NM_001199535 | TGIF2-C200RF24 | 536  | 826  | 12.261612071  |
| NM_001199535 | TGIF2-C200RF24 | 308  | 535  | 12.2231379232 |
| NM_016075    | VPS36          | 4060 | 4107 | 5.46271242685 |
| NM_016489    | NT5C3          | 517  | 580  | 5.61309941049 |
| NM_016489    | NT5C3          | 589  | 646  | 6.61309964641 |
| NM_016489    | NT5C3          | 1224 | 1404 | 8.07253126505 |
| NM_016489    | NT5C3          | 321  | 506  | 7.42045456847 |
| NM_016489    | NT5C3          | 1031 | 1205 | 7.9350277413  |
| NM_016489    | NT5C3          | 1636 | 1701 | 5.61309963886 |
| NM_016489    | NT5C3          | 699  | 983  | 9.13666160247 |
| NM_172020    | POM121         | 4194 | 4275 | 9.64416313138 |
| NM_172020    | POM121         | 2620 | 2680 | 9.381128718   |

|           |        |      |      |               |
|-----------|--------|------|------|---------------|
| NM_172020 | POM121 | 4914 | 4965 | 8.05920062311 |
| NM_172020 | POM121 | 1240 | 1284 | 8.05920063066 |
| NM_172020 | POM121 | 1289 | 1374 | 8.05920063066 |
| NM_172020 | POM121 | 5151 | 5199 | 8.05518303049 |
| NM_172020 | POM121 | 3497 | 3538 | 8.64014553121 |
| NM_172020 | POM121 | 667  | 735  | 8.05920063066 |
| NM_172020 | POM121 | 1048 | 1171 | 9.64416313138 |
| NM_172020 | POM121 | 5019 | 5104 | 7.05518303049 |
| NM_172020 | POM121 | 750  | 825  | 8.64416313138 |
| NM_172020 | POM121 | 2681 | 2721 | 8.64416289546 |
| NM_172020 | POM121 | 3030 | 3073 | 7.05920039474 |
| NM_172020 | POM121 | 4277 | 4420 | 10.3811287255 |
| NM_172020 | POM121 | 3606 | 3719 | 8.64416313138 |
| NM_172020 | POM121 | 14   | 69   | 7.05919389961 |
| NM_172020 | POM121 | 895  | 980  | 7.05920063066 |
| NM_172020 | POM121 | 2398 | 2504 | 8.64416313138 |
| NM_172020 | POM121 | 2026 | 2184 | 8.64416313138 |
| NM_172020 | POM121 | 4012 | 4128 | 9.05920063066 |
| NM_172020 | POM121 | 3797 | 3940 | 10.2291256321 |
| NM_172020 | POM121 | 3291 | 3496 | 10.0592006307 |
| NM_172020 | POM121 | 5254 | 5475 | 8.05920063066 |
| NM_172020 | POM121 | 193  | 501  | 10.5186322493 |
| NM_172020 | POM121 | 4421 | 4604 | 10.0592006307 |
| NM_172020 | POM121 | 1420 | 1540 | 7.05920063066 |
| NM_172020 | POM121 | 1950 | 2025 | 8.05920063044 |
| NM_172020 | POM121 | 1575 | 1720 | 7.05920063066 |
| NM_172020 | POM121 | 519  | 664  | 9.38112872555 |
| NM_016077 | PTRH2  | 315  | 393  | 3.61632264179 |
| NM_016077 | PTRH2  | 146  | 243  | 5.9382509726  |
| NM_016077 | PTRH2  | 653  | 729  | 6.20128537843 |
| NM_016077 | PTRH2  | 425  | 627  | 7.42367779977 |
| NM_181050 | AXIN1  | 294  | 359  | 3.98197454246 |
| NM_016484 | PDZD11 | 313  | 406  | 7.77730719735 |
| NM_016485 | VTA1   | 1226 | 1288 | 3.31235304434 |
| NM_016485 | VTA1   | 1513 | 1560 | 4.89730882155 |
| NM_016485 | VTA1   | 894  | 979  | 5.89731555261 |
| NM_016485 | VTA1   | 223  | 351  | 6.31235305189 |
| NM_016485 | VTA1   | 422  | 546  | 6.48227805333 |
| NM_016485 | VTA1   | 179  | 219  | 4.31217930157 |
| NM_016485 | VTA1   | 611  | 673  | 3.30833545171 |
| NM_016486 | TMEM69 | 771  | 874  | 8.08323167708 |
| NM_016486 | TMEM69 | 485  | 555  | 8.66819417026 |
| NM_016376 | ANKFY1 | 3103 | 3163 | 8.13031265785 |
| NM_016376 | ANKFY1 | 6238 | 6328 | 8.126468808   |
| NM_016376 | ANKFY1 | 7303 | 7387 | 9.13048640817 |
| NM_016376 | ANKFY1 | 5130 | 5210 | 7.13048640817 |
| NM_016376 | ANKFY1 | 3414 | 3451 | 7.13047967712 |
| NM_016376 | ANKFY1 | 3975 | 4063 | 7.13048640795 |
| NM_016376 | ANKFY1 | 5243 | 5342 | 8.71544217784 |
| NM_016376 | ANKFY1 | 817  | 864  | 7.13048640795 |

|              |        |      |      |               |
|--------------|--------|------|------|---------------|
| NM_016376    | ANKFY1 | 4410 | 4489 | 8.71544217784 |
| NM_016376    | ANKFY1 | 5002 | 5121 | 9.71544890889 |
| NM_016376    | ANKFY1 | 7147 | 7187 | 8.04634719879 |
| NM_016376    | ANKFY1 | 3464 | 3545 | 8.13047967712 |
| NM_016376    | ANKFY1 | 3650 | 3763 | 8.13048640817 |
| NM_016376    | ANKFY1 | 369  | 463  | 9.13048640817 |
| NM_016376    | ANKFY1 | 1737 | 1899 | 9.45241450306 |
| NM_016376    | ANKFY1 | 2613 | 2732 | 9.13048640817 |
| NM_016376    | ANKFY1 | 493  | 600  | 8.13048640817 |
| NM_016376    | ANKFY1 | 6411 | 6510 | 8.71544890134 |
| NM_016376    | ANKFY1 | 719  | 795  | 8.126468808   |
| NM_015939    | TRMT6  | 1410 | 1447 | 6.53255537241 |
| NM_015939    | TRMT6  | 1292 | 1356 | 7.20165707496 |
| NM_015938    | NMD3   | 1894 | 1971 | 3.64717213598 |
| NM_015938    | NMD3   | 873  | 914  | 4.6471721433  |
| NM_015938    | NMD3   | 209  | 244  | 4.2321346367  |
| NM_015938    | NMD3   | 2323 | 2358 | 2.56303293414 |
| NM_015938    | NMD3   | 1193 | 1241 | 2.64315454335 |
| NM_015938    | NMD3   | 1599 | 1712 | 4.64717214353 |
| NM_015938    | NMD3   | 275  | 368  | 3.64716541247 |
| NM_015938    | NMD3   | 551  | 657  | 4.96910023841 |
| NM_015938    | NMD3   | 683  | 807  | 4.96910023841 |
| NM_001164814 | ACIN1  | 4478 | 4524 | 5.55335973255 |
| NM_001164814 | ACIN1  | 3154 | 3242 | 5.96857098214 |
| NM_001164814 | ACIN1  | 4650 | 4708 | 5.55353324695 |
| NM_001164814 | ACIN1  | 2035 | 2116 | 5.55353348286 |
| NM_001164814 | ACIN1  | 3755 | 3812 | 3.96455338197 |
| NM_001164814 | ACIN1  | 1845 | 1909 | 5.55353347531 |
| NM_001164814 | ACIN1  | 2922 | 2979 | 4.96455338197 |
| NM_001164814 | ACIN1  | 2999 | 3079 | 4.96857098214 |
| NM_001164814 | ACIN1  | 1917 | 1998 | 5.55353348286 |
| NM_001164814 | ACIN1  | 4843 | 4896 | 3.96857098192 |
| NM_001164814 | ACIN1  | 2650 | 2705 | 4.96856425109 |
| NM_001164814 | ACIN1  | 3372 | 3609 | 6.55353348286 |
| NM_030981    | RAB1B  | 30   | 159  | 8.85200861965 |
| NM_030981    | RAB1B  | 974  | 1115 | 9.79542509128 |
| NM_030981    | RAB1B  | 1130 | 1201 | 7.15156890151 |
| NM_030981    | RAB1B  | 494  | 551  | 6.73653140201 |
| NM_030981    | RAB1B  | 650  | 691  | 5.15139515119 |
| NM_030981    | RAB1B  | 562  | 649  | 7.73653140223 |
| NM_030981    | RAB1B  | 1447 | 1564 | 7.4734969964  |
| NM_030981    | RAB1B  | 183  | 473  | 9.54388632429 |
| NM_030981    | RAB1B  | 1216 | 1382 | 8.15156890151 |
| NM_030981    | RAB1B  | 772  | 968  | 9.32149390295 |
| NM_030981    | RAB1B  | 1590 | 1814 | 10.1515689015 |
| NM_015934    | NOP58  | 596  | 654  | 3.91326302533 |
| NM_015934    | NOP58  | 1071 | 1116 | 3.91308928256 |
| NM_015934    | NOP58  | 907  | 972  | 4.65022861949 |
| NM_015934    | NOP58  | 406  | 512  | 2.32830053215 |
| NM_015934    | NOP58  | 659  | 740  | 3.3282938011  |

|              |         |      |      |               |
|--------------|---------|------|------|---------------|
| NM_015934    | NOP58   | 767  | 813  | 2.32812678184 |
| NM_015934    | NOP58   | 91   | 188  | 3.32830053193 |
| NM_015937    | PIGT    | 618  | 689  | 8.51342520643 |
| NM_015937    | PIGT    | 559  | 614  | 8.83535330132 |
| NM_015937    | PIGT    | 917  | 982  | 6.51342520643 |
| NM_015937    | PIGT    | 1228 | 1334 | 8.51342520643 |
| NM_015937    | PIGT    | 1793 | 1867 | 8.51342520643 |
| NM_015937    | PIGT    | 2125 | 2164 | 6.51342497052 |
| NM_015937    | PIGT    | 314  | 377  | 7.50940760626 |
| NM_015937    | PIGT    | 408  | 457  | 9.09838770716 |
| NM_015937    | PIGT    | 993  | 1107 | 9.51342520643 |
| NM_015937    | PIGT    | 1160 | 1219 | 7.51342520643 |
| NM_015937    | PIGT    | 2194 | 2242 | 6.51342497052 |
| NM_015937    | PIGT    | 2070 | 2119 | 7.51325145612 |
| NM_015937    | PIGT    | 99   | 269  | 9.09838770716 |
| NM_015937    | PIGT    | 760  | 900  | 8.09838770716 |
| NM_015937    | PIGT    | 1352 | 1479 | 8.51342520643 |
| NM_015937    | PIGT    | 1521 | 1615 | 9.09838770716 |
| NM_015937    | PIGT    | 457  | 537  | 8.51342520643 |
| NM_015937    | PIGT    | 1638 | 1739 | 8.51342520643 |
| NM_015933    | CCDC72  | 114  | 155  | 2.68563842346 |
| NM_015933    | CCDC72  | 244  | 368  | 2.76977763285 |
| NM_015933    | CCDC72  | 177  | 237  | 3.76977763284 |
| NM_015932    | POMP    | 115  | 335  | 10.2089908083 |
| NM_015932    | POMP    | 677  | 732  | 6.56496086824 |
| NM_015932    | POMP    | 374  | 648  | 9.813062132   |
| NM_001012507 | CENPW   | 573  | 763  | 5.55597172154 |
| NM_138434    | C7orf29 | 1711 | 1801 | 10.9873148419 |
| NM_138434    | C7orf29 | 2606 | 2697 | 10.9873148417 |
| NM_138434    | C7orf29 | 862  | 923  | 9.98731483435 |
| NM_138434    | C7orf29 | 2055 | 2094 | 9.40234561012 |
| NM_138434    | C7orf29 | 2749 | 2816 | 9.98731483435 |
| NM_138434    | C7orf29 | 2255 | 2330 | 9.98730811084 |
| NM_138434    | C7orf29 | 478  | 566  | 8.40235234117 |
| NM_138434    | C7orf29 | 1135 | 1217 | 9.40235234118 |
| NM_138434    | C7orf29 | 1225 | 1307 | 9.40235234118 |
| NM_138434    | C7orf29 | 0    | 92   | 9.40235234118 |
| NM_138431    | MFSD3   | 477  | 551  | 12.3743977274 |
| NM_138431    | MFSD3   | 6    | 95   | 11.9593602282 |
| NM_138431    | MFSD3   | 1330 | 1412 | 11.9593602282 |
| NM_138431    | MFSD3   | 976  | 1051 | 11.3743977199 |
| NM_138431    | MFSD3   | 886  | 971  | 10.3743977274 |
| NM_005165    | ALDOC   | 1351 | 1391 | 4.57270113052 |
| NM_005165    | ALDOC   | 452  | 672  | 6.65684033991 |
| NM_001242534 | MFSD11  | 554  | 610  | 8.45388264181 |
| NM_001242534 | MFSD11  | 1707 | 1757 | 8.45388264181 |
| NM_001242534 | MFSD11  | 986  | 1059 | 9.19084823598 |
| NM_001242534 | MFSD11  | 1659 | 1705 | 8.45388264181 |
| NM_001242534 | MFSD11  | 1061 | 1131 | 8.45388264181 |
| NM_001242534 | MFSD11  | 2115 | 2183 | 7.86892014109 |



|              |        |       |       |               |
|--------------|--------|-------|-------|---------------|
| NM_001242534 | MFSD11 | 1333  | 1395  | 10.190848236  |
| NM_001242534 | MFSD11 | 881   | 985   | 8.86892014109 |
| NM_001242534 | MFSD11 | 1859  | 2027  | 10.4538826418 |
| NM_001242534 | MFSD11 | 1791  | 1854  | 8.45388264159 |
| NM_001242534 | MFSD11 | 2052  | 2101  | 8.86874639078 |
| NM_001242534 | MFSD11 | 1395  | 1552  | 10.190848236  |
| NM_001242534 | MFSD11 | 1142  | 1323  | 9.67627506315 |
| NM_001242534 | MFSD11 | 668   | 843   | 10.0388451425 |
| NM_007348    | ATF6   | 1274  | 1350  | 6.75986715577 |
| NM_007348    | ATF6   | 1692  | 1749  | 5.75986042472 |
| NM_007348    | ATF6   | 1376  | 1431  | 5.75969340546 |
| NM_007348    | ATF6   | 950   | 997   | 6.75986042472 |
| NM_007348    | ATF6   | 408   | 454   | 4.75986715577 |
| NM_007348    | ATF6   | 2137  | 2190  | 5.7558495556  |
| NM_007348    | ATF6   | 723   | 764   | 4.67572794639 |
| NM_007348    | ATF6   | 1915  | 1995  | 7.08179525066 |
| NM_007348    | ATF6   | 2351  | 2436  | 4.75986714822 |
| NM_007348    | ATF6   | 143   | 294   | 7.08179525066 |
| NM_007348    | ATF6   | 1130  | 1268  | 6.34482965649 |
| NM_007348    | ATF6   | 1433  | 1525  | 4.75969340546 |
| NM_007348    | ATF6   | 297   | 361   | 6.34482964895 |
| NM_007348    | ATF6   | 455   | 621   | 7.34482965649 |
| NM_007348    | ATF6   | 1548  | 1691  | 6.75986715577 |
| NM_007345    | ZNF236 | 4146  | 4199  | 10.469227994  |
| NM_007347    | AP4E1  | 5794  | 5840  | 7.97927208188 |
| NM_007347    | AP4E1  | 2137  | 2200  | 7.97542823202 |
| NM_007347    | AP4E1  | 5934  | 5990  | 7.9794458322  |
| NM_007347    | AP4E1  | 2075  | 2132  | 9.97943910114 |
| NM_007346    | OGFR   | 254   | 319   | 6.31850715856 |
| NM_007346    | OGFR   | 342   | 452   | 6.90346965929 |
| NM_001242539 | NCOA6  | 3536  | 3630  | 7.75550486888 |
| NM_001242539 | NCOA6  | 354   | 416   | 7.75148726871 |
| NM_001242539 | NCOA6  | 3857  | 3914  | 5.75549813783 |
| NM_001242539 | NCOA6  | 2574  | 2640  | 6.75533111856 |
| NM_001242539 | NCOA6  | 3233  | 3282  | 6.75533111856 |
| NM_001242539 | NCOA6  | 919   | 994   | 5.75148726871 |
| NM_001242539 | NCOA6  | 3428  | 3484  | 5.75148726871 |
| NM_001242539 | NCOA6  | 3155  | 3201  | 5.75148726871 |
| NM_001242539 | NCOA6  | 1016  | 1066  | 6.75549813783 |
| NM_001242539 | NCOA6  | 205   | 311   | 8.07743296377 |
| NM_001242539 | NCOA6  | 3921  | 4035  | 5.75550486888 |
| NM_007342    | NUPL2  | 980   | 1051  | 7.99894190692 |
| NM_007342    | NUPL2  | 382   | 417   | 8.00278575677 |
| NM_007342    | NUPL2  | 843   | 907   | 8.58792200759 |
| NM_007342    | NUPL2  | 484   | 615   | 9.32488760198 |
| NM_017684    | VPS13C | 6495  | 6529  | 8.24668808858 |
| NM_017684    | VPS13C | 10606 | 10680 | 7.16656647937 |
| NM_017684    | VPS13C | 9886  | 9963  | 8.83549443916 |
| NM_017684    | VPS13C | 3963  | 4022  | 7.25070568853 |
| NM_017684    | VPS13C | 10946 | 11000 | 7.25053193844 |

|           |          |       |       |                    |
|-----------|----------|-------|-------|--------------------|
| NM_017684 | VPS13C   | 10032 | 10097 | 7.24668808858      |
| NM_017684 | VPS13C   | 4562  | 4648  | 9.57263377609      |
| NM_017684 | VPS13C   | 7390  | 7451  | 8.25070568121      |
| NM_017684 | VPS13C   | 5371  | 5428  | 8.83566818925      |
| NM_017684 | VPS13C   | 12270 | 12340 | 8.8316505893       |
| NM_017684 | VPS13C   | 11535 | 11597 | 7.24668808858      |
| NM_017684 | VPS13C   | 11792 | 11869 | 7.25070568875      |
| NM_017684 | VPS13C   | 3545  | 3619  | 7.16656647937      |
| NM_017684 | VPS13C   | 2107  | 2171  | 8.83566795356      |
| NM_017684 | VPS13C   | 8980  | 9062  | 7.24668808858      |
| NM_017684 | VPS13C   | 12852 | 12901 | 7.2506989577       |
| NM_017684 | VPS13C   | 9186  | 9248  | 8.25070568875      |
| NM_017684 | VPS13C   | 8862  | 8913  | 8.16656647937      |
| NM_017684 | VPS13C   | 6087  | 6146  | 9.25070545284      |
| NM_017684 | VPS13C   | 7870  | 7903  | 8.16656647937      |
| NM_017684 | VPS13C   | 10201 | 10280 | 7.24668808858      |
| NM_017684 | VPS13C   | 12770 | 12817 | 7.25070568853      |
| NM_017684 | VPS13C   | 8787  | 8850  | 8.16656647937      |
| NM_017684 | VPS13C   | 12703 | 12766 | 8.25070568875      |
| NM_017684 | VPS13C   | 3495  | 3542  | 7.25053193844      |
| NM_017684 | VPS13C   | 7457  | 7545  | 8.24668808858      |
| NM_017684 | VPS13C   | 12151 | 12225 | 7.25070568875      |
| NM_017684 | VPS13C   | 6348  | 6399  | 8.24668808858      |
| NM_017684 | VPS13C   | 6728  | 6864  | 9.25070568875      |
| NM_017684 | VPS13C   | 11633 | 11712 | 7.25070568875      |
| NM_017684 | VPS13C   | 324   | 393   | 8.25053193844      |
| NM_017684 | VPS13C   | 5715  | 5818  | 9.57263378364      |
| NM_017684 | VPS13C   | 2570  | 2642  | 8.16656647937      |
| NM_017684 | VPS13C   | 5091  | 5210  | 7.2506989577       |
| NM_173481 | C19orf21 |       | 1920  | 1973 9.66396583337 |
| NM_173481 | C19orf21 |       | 1810  | 1864 8.58384422416 |
| NM_017688 | BSPRY    | 624   | 700   | 10.5276343453      |
| NM_017688 | BSPRY    | 229   | 291   | 11.5316452144      |
| NM_025099 | CTC1     | 5201  | 5233  | 11.3109773017      |
| NM_025099 | CTC1     | 3438  | 3525  | 8.7260080699       |
| NM_025099 | CTC1     | 5242  | 5285  | 9.72601480096      |
| NM_025099 | CTC1     | 3757  | 3819  | 8.7260080699       |
| NM_025099 | CTC1     | 4828  | 4898  | 11.533369723       |
| NM_025099 | CTC1     | 5595  | 5659  | 11.3109773017      |
| NM_025090 | USP36    | 1160  | 1207  | 7.82237682822      |
| NM_025090 | USP36    | 4871  | 4955  | 6.82238355927      |
| NM_025092 | ATHL1    | 2294  | 2350  | 7.53594692188      |
| NM_024329 | EFHD2    | 2111  | 2155  | 4.28349925523      |
| NM_024324 | CRELD2   | 1173  | 1267  | 8.24492047353      |
| NM_024324 | CRELD2   | 457   | 567   | 8.56684856842      |
| NM_024324 | CRELD2   | 342   | 433   | 7.24492047352      |
| NM_024324 | CRELD2   | 1053  | 1119  | 8.24492046598      |
| NM_024324 | CRELD2   | 1296  | 1388  | 7.24492047353      |
| NM_024324 | CRELD2   | 951   | 1028  | 8.24492047353      |
| NM_024324 | CRELD2   | 670   | 894   | 8.56684856842      |

|              |         |      |      |               |
|--------------|---------|------|------|---------------|
| NM_001080512 | BICC1   | 1220 | 1264 | 9.91388977012 |
| NM_001080512 | BICC1   | 2413 | 2505 | 8.91389000604 |
| NM_001080512 | BICC1   | 2155 | 2222 | 10.9137162557 |
| NM_001080512 | BICC1   | 2591 | 2655 | 9.91388327499 |
| NM_001080512 | BICC1   | 594  | 683  | 11.4948349066 |
| NM_001080512 | BICC1   | 1323 | 1366 | 9.91371625572 |
| NM_001080512 | BICC1   | 2019 | 2072 | 8.82975079665 |
| NM_001080512 | BICC1   | 1380 | 1477 | 9.91389000604 |
| NM_001080512 | BICC1   | 1578 | 1675 | 9.91389000604 |
| NM_001080512 | BICC1   | 2952 | 3039 | 9.91388977012 |
| NM_004215    | EBAG9   | 565  | 625  | 5.33330223342 |
| NM_024857    | ATAD5   | 5728 | 5796 | 8.38496193711 |
| NM_024857    | ATAD5   | 4621 | 4706 | 10.3849619298 |
| NM_001080517 | SETD5   | 1205 | 1248 | 3.82253467151 |
| NM_001080517 | SETD5   | 3314 | 3378 | 5.40749717224 |
| NM_001080517 | SETD5   | 1447 | 1500 | 3.82253467151 |
| NM_001080517 | SETD5   | 6039 | 6126 | 4.82253490743 |
| NM_001080517 | SETD5   | 4759 | 4822 | 3.82236115712 |
| NM_001080517 | SETD5   | 3132 | 3263 | 5.82253490743 |
| NM_001080517 | SETD5   | 433  | 484  | 5.82253489988 |
| NM_001080517 | SETD5   | 4262 | 4318 | 3.82252817638 |
| NM_001080517 | SETD5   | 5075 | 5157 | 4.82253467151 |
| NM_001080517 | SETD5   | 6509 | 6565 | 3.73839569805 |
| NM_001080517 | SETD5   | 4551 | 4633 | 3.82253489988 |
| NM_175886    | PRPS1L1 | 452  | 491  | 12.2604857419 |
| NM_017420    | SIX4    | 4023 | 4146 | 9.77241237957 |
| NM_017426    | NUP54   | 987  | 1026 | 6.78180822327 |
| NM_017426    | NUP54   | 276  | 347  | 6.19684572255 |
| NM_017426    | NUP54   | 1981 | 2021 | 5.28098469601 |
| NM_001195478 | TFG     | 767  | 825  | 4.8723916903  |
| NM_001195478 | TFG     | 1612 | 1678 | 4.8723916903  |
| NM_001195478 | TFG     | 495  | 555  | 6.67974661236 |
| NM_001195478 | TFG     | 577  | 617  | 4.87221793998 |
| NM_001195478 | TFG     | 685  | 720  | 3.87221793998 |
| NM_001195478 | TFG     | 868  | 952  | 5.45735419102 |
| NM_001195478 | TFG     | 1246 | 1385 | 4.8723916903  |
| NM_001195478 | TFG     | 48   | 173  | 6.8723916903  |
| NM_001195478 | TFG     | 1413 | 1593 | 7.77928228591 |
| NM_001195478 | TFG     | 265  | 489  | 8.12031920374 |
| NM_001195478 | TFG     | 1056 | 1196 | 6.45735419102 |
| NM_003847    | PEX11A  | 706  | 771  | 8.58940880923 |
| NM_001193417 | DDX3X   | 3376 | 3462 | 4.43936029779 |
| NM_001193417 | DDX3X   | 4673 | 4755 | 2.85439779707 |
| NM_001193417 | DDX3X   | 4931 | 5004 | 4.43936029779 |
| NM_001193417 | DDX3X   | 1343 | 1436 | 5.43936029779 |
| NM_001193417 | DDX3X   | 3739 | 3849 | 2.85439779707 |
| NM_001193417 | DDX3X   | 3467 | 3497 | 4.43918654748 |
| NM_001193417 | DDX3X   | 962  | 1046 | 2.85439779707 |
| NM_001193417 | DDX3X   | 1443 | 1524 | 4.43936029779 |
| NM_001193417 | DDX3X   | 2516 | 2609 | 4.43936029779 |

|              |           |      |      |               |               |
|--------------|-----------|------|------|---------------|---------------|
| NM_001193417 | DDX3X     | 1243 | 1303 | 5.17632589196 |               |
| NM_001193417 | DDX3X     | 2849 | 2937 | 3.85439779707 |               |
| NM_001193417 | DDX3X     | 3280 | 3347 | 2.85439778952 |               |
| NM_001193417 | DDX3X     | 4775 | 4858 | 4.43936029779 |               |
| NM_001193417 | DDX3X     | 1053 | 1227 | 5.85439779707 |               |
| NM_001193417 | DDX3X     | 1642 | 1933 | 7.98368081402 |               |
| NM_001193417 | DDX3X     | 2289 | 2507 | 7.10232531052 |               |
| NM_001193417 | DDX3X     | 5008 | 5088 | 4.43936029779 |               |
| NM_001193417 | DDX3X     | 3053 | 3237 | 7.02432279851 |               |
| NM_001193417 | DDX3X     | 1949 | 2202 | 7.49825398685 |               |
| NM_001193417 | DDX3X     | 4539 | 4615 | 2.85439779685 |               |
| NM_001193417 | DDX3X     | 2698 | 2767 | 2.85439779707 |               |
| NM_001193417 | DDX3X     | 3882 | 3983 | 3.85439779707 |               |
| NM_001193417 | DDX3X     | 822  | 921  | 4.43936029779 |               |
| NM_001193417 | DDX3X     | 1533 | 1594 | 2.85439756115 |               |
| NM_003518    | HIST1H2BG |      | 328  | 423           | 8.50053272757 |
| NM_003518    | HIST1H2BG |      | 163  | 252           | 10.5005327351 |
| NM_003518    | HIST1H2BG |      | 37   | 125           | 9.50053273511 |
| NM_003519    | HIST1H2BL |      | 194  | 248           | 10.8631028145 |
| NM_003519    | HIST1H2BL |      | 128  | 192           | 8.8631028145  |
| NM_003514    | HIST1H2AM |      | 92   | 170           | 10.352741893  |
| NM_003514    | HIST1H2AM |      | 197  | 251           | 7.54538697089 |
| NM_003514    | HIST1H2AM |      | 5    | 72            | 10.352741893  |
| NM_003514    | HIST1H2AM |      | 275  | 480           | 10.8673150658 |
| NM_032051    | PATZ1     | 1719 | 1762 | 6.59517804495 |               |
| NM_032051    | PATZ1     | 483  | 529  | 8.67529965416 |               |
| NM_003517    | HIST2H2AC |      | 150  | 319           | 9.30213002964 |
| NM_003047    | SLC9A1    | 4140 | 4194 | 8.1674022051  |               |
| NM_003047    | SLC9A1    | 1085 | 1140 | 9.16757595542 |               |
| NM_003047    | SLC9A1    | 2426 | 2505 | 8.16757594787 |               |
| NM_003047    | SLC9A1    | 792  | 848  | 9.75253822022 |               |
| NM_003047    | SLC9A1    | 2270 | 2323 | 8.16756922437 |               |
| NM_003047    | SLC9A1    | 1585 | 1685 | 9.16757595542 |               |
| NM_003512    | HIST1H2AC |      | 31   | 134           | 11.0090431754 |
| NM_003512    | HIST1H2AC |      | 308  | 405           | 8.76111566195 |
| NM_003512    | HIST1H2AC |      | 458  | 517           | 8.34607816267 |
| NM_003512    | HIST1H2AC |      | 229  | 300           | 8.76111566195 |
| NM_003513    | HIST1H2AB |      | 15   | 88            | 10.9783463782 |
| NM_003513    | HIST1H2AB |      | 164  | 228           | 10.3933838775 |
| NM_003513    | HIST1H2AB |      | 265  | 309           | 9.3933771464  |
| NM_003513    | HIST1H2AB |      | 331  | 414           | 10.3933838772 |
| NM_001139457 | BCAP31    | 1335 | 1400 | 2.39275159126 |               |
| NM_001139457 | BCAP31    | 88   | 146  | 3.39274486021 |               |
| NM_001139457 | BCAP31    | 1409 | 1622 | 6.8521832099  |               |
| NM_001139457 | BCAP31    | 1043 | 1323 | 6.64067910471 |               |
| NM_001139457 | BCAP31    | 1657 | 1818 | 4.97771409199 |               |
| NM_001139457 | BCAP31    | 604  | 913  | 8.17411130479 |               |
| NM_001139457 | BCAP31    | 917  | 1029 | 6.20010651332 |               |
| NM_207046    | ENSA      | 83   | 119  | 3.84930246763 |               |
| NM_207046    | ENSA      | 133  | 185  | 3.84930246763 |               |

|              |        |      |      |               |
|--------------|--------|------|------|---------------|
| NM_207046    | ENSA   | 799  | 875  | 3.85332006025 |
| NM_001206682 | ATF7   | 165  | 234  | 6.78276678042 |
| NM_001042404 | CEP170 | 579  | 642  | 7.84260833887 |
| NM_001042404 | CEP170 | 5927 | 6020 | 6.25764560245 |
| NM_001042404 | CEP170 | 3155 | 3259 | 8.25764583814 |
| NM_001031710 | KLHL7  | 1780 | 1834 | 6.9590810043  |
| NM_001031710 | KLHL7  | 507  | 619  | 6.96309860447 |
| NM_001031710 | KLHL7  | 2422 | 2478 | 6.9590810043  |
| NM_005911    | MAT2A  | 2170 | 2240 | 4.28856678559 |
| NM_005911    | MAT2A  | 2058 | 2112 | 4.28856005453 |
| NM_005911    | MAT2A  | 2864 | 2899 | 4.28454918541 |
| NM_005911    | MAT2A  | 297  | 352  | 5.28856678558 |
| NM_005911    | MAT2A  | 2549 | 2623 | 4.28856678559 |
| NM_005911    | MAT2A  | 1151 | 1212 | 6.28856654967 |
| NM_005911    | MAT2A  | 1507 | 1562 | 4.28856005453 |
| NM_005911    | MAT2A  | 1062 | 1117 | 6.28856678559 |
| NM_005911    | MAT2A  | 1706 | 1809 | 6.28856678559 |
| NM_005911    | MAT2A  | 1313 | 1455 | 4.28856678559 |
| NM_005911    | MAT2A  | 1577 | 1706 | 8.09592170764 |
| NM_005911    | MAT2A  | 1221 | 1286 | 5.87352928631 |
| NM_005911    | MAT2A  | 1829 | 2058 | 8.28856678559 |
| NM_005911    | MAT2A  | 356  | 431  | 5.87352255525 |
| NM_005911    | MAT2A  | 2318 | 2509 | 7.61049488047 |
| NM_005911    | MAT2A  | 459  | 663  | 7.61049488047 |
| NM_005911    | MAT2A  | 671  | 778  | 5.87352928631 |
| NM_005911    | MAT2A  | 796  | 937  | 4.28856678559 |
| NM_152438    | DDX11  | 1457 | 1500 | 6.79380753351 |
| NM_152438    | DDX11  | 1844 | 1904 | 7.38278762685 |
| NM_152438    | DDX11  | 1705 | 1751 | 6.79380753351 |
| NM_152438    | DDX11  | 3069 | 3123 | 5.79782489776 |
| NM_152438    | DDX11  | 2303 | 2375 | 7.38278090335 |
| NM_152438    | DDX11  | 1010 | 1085 | 6.79782513368 |
| NM_152438    | DDX11  | 3459 | 3515 | 6.79380753351 |
| NM_152438    | DDX11  | 1509 | 1628 | 7.3827876344  |
| NM_152438    | DDX11  | 2568 | 2633 | 6.79782512613 |
| NM_152438    | DDX11  | 3335 | 3427 | 7.3827876344  |
| NM_152438    | DDX11  | 310  | 424  | 7.3827876344  |
| NM_005915    | MCM6   | 2708 | 2738 | 5.95291797199 |
| NM_005915    | MCM6   | 822  | 876  | 8.84441210344 |
| NM_005915    | MCM6   | 922  | 983  | 6.03705718138 |
| NM_005915    | MCM6   | 2622 | 2680 | 7.03705717383 |
| NM_005915    | MCM6   | 1048 | 1128 | 8.35898527627 |
| NM_005915    | MCM6   | 2796 | 2857 | 7.61800208193 |
| NM_005915    | MCM6   | 1782 | 1843 | 8.35898527627 |
| NM_005915    | MCM6   | 1560 | 1658 | 8.6220196821  |
| NM_005915    | MCM6   | 519  | 629  | 8.35898527627 |
| NM_005915    | MCM6   | 1136 | 1248 | 7.6220196821  |
| NM_005915    | MCM6   | 1264 | 1320 | 7.03688343106 |
| NM_005915    | MCM6   | 2102 | 2158 | 7.62201944618 |
| NM_005915    | MCM6   | 2530 | 2621 | 7.03705718137 |

|              |         |      |      |               |
|--------------|---------|------|------|---------------|
| NM_005915    | MCM6    | 1669 | 1779 | 9.6220196821  |
| NM_005915    | MCM6    | 2451 | 2521 | 8.35898527627 |
| NM_005915    | MCM6    | 1372 | 1553 | 10.4293746042 |
| NM_005915    | MCM6    | 1867 | 2097 | 9.20698218282 |
| NM_005915    | MCM6    | 226  | 518  | 10.2849846948 |
| NM_005915    | MCM6    | 2194 | 2413 | 9.84441210344 |
| NM_032125    | TMEM222 | 327  | 404  | 9.06869288005 |
| NM_032125    | TMEM222 | 493  | 632  | 10.2910853016 |
| NM_032124    | HDHD2   | 146  | 181  | 4.60513414922 |
| NM_032124    | HDHD2   | 675  | 731  | 4.68926662755 |
| NM_005918    | MDH2    | 754  | 819  | 5.77413725273 |
| NM_005918    | MDH2    | 1199 | 1236 | 3.77413052169 |
| NM_005918    | MDH2    | 831  | 1026 | 7.47457697088 |
| NM_005918    | MDH2    | 1027 | 1177 | 6.77413725274 |
| NM_005918    | MDH2    | 1253 | 1319 | 6.09606534763 |
| NM_005918    | MDH2    | 66   | 564  | 8.90342026969 |
| NM_005918    | MDH2    | 592  | 748  | 6.5814921748  |
| NM_005918    | MDH2    | 1333 | 1460 | 5.77413725274 |
| NM_032121    | MAGT1   | 1651 | 1706 | 8.07265962053 |
| NM_032121    | MAGT1   | 493  | 578  | 9.35276753973 |
| NM_032121    | MAGT1   | 1175 | 1243 | 8.8502671992  |
| NM_032121    | MAGT1   | 2615 | 2652 | 5.26529796742 |
| NM_032121    | MAGT1   | 3388 | 3478 | 7.8502671992  |
| NM_032121    | MAGT1   | 615  | 885  | 11.1232856936 |
| NM_032121    | MAGT1   | 142  | 492  | 10.8502671992 |
| NM_032121    | MAGT1   | 3930 | 3998 | 6.2612870983  |
| NM_032121    | MAGT1   | 1246 | 1352 | 7.58723279336 |
| NM_032121    | MAGT1   | 3576 | 3676 | 8.43522969992 |
| NM_032121    | MAGT1   | 906  | 1160 | 10.6915694532 |
| NM_032121    | MAGT1   | 1364 | 1453 | 7.8502671992  |
| NM_032121    | MAGT1   | 3100 | 3187 | 5.2612870983  |
| NM_032120    | C7orf64 | 573  | 646  | 5.66092450801 |
| NM_032122    | DTNBP1  | 1203 | 1270 | 6.90186967493 |
| NM_031299    | CDCA3   | 289  | 411  | 7.21607934565 |
| NM_031299    | CDCA3   | 861  | 921  | 6.21607261459 |
| NM_031299    | CDCA3   | 969  | 1026 | 8.21206174547 |
| NM_031299    | CDCA3   | 1027 | 1108 | 8.53800744053 |
| NM_031299    | CDCA3   | 474  | 588  | 8.21607934565 |
| NM_001039591 | USP9X   | 2616 | 2667 | 7.7311545874  |
| NM_001039591 | USP9X   | 3080 | 3110 | 6.32508728313 |
| NM_001039591 | USP9X   | 6446 | 6525 | 6.99418875731 |
| NM_001039591 | USP9X   | 5569 | 5650 | 6.99418875731 |
| NM_001039591 | USP9X   | 9232 | 9293 | 6.40905274219 |
| NM_001039591 | USP9X   | 6004 | 6062 | 6.99418899323 |
| NM_001039591 | USP9X   | 8631 | 8706 | 5.40520889234 |
| NM_001039591 | USP9X   | 806  | 835  | 5.40520889234 |
| NM_001039591 | USP9X   | 3110 | 3153 | 6.40921976146 |
| NM_001039591 | USP9X   | 1887 | 1950 | 6.99418226218 |
| NM_001039591 | USP9X   | 1967 | 2021 | 6.40520889234 |
| NM_001039591 | USP9X   | 3547 | 3606 | 6.99418899323 |

|              |         |       |       |                |
|--------------|---------|-------|-------|----------------|
| NM_001039591 | USP9X   | 4109  | 4184  | 6.99418899301  |
| NM_001039591 | USP9X   | 3310  | 3354  | 5.32508728313  |
| NM_001039591 | USP9X   | 6756  | 6847  | 8.21658141457  |
| NM_001039591 | USP9X   | 1119  | 1178  | 6.99017139306  |
| NM_001039591 | USP9X   | 1040  | 1115  | 7.99418899323  |
| NM_001039591 | USP9X   | 2026  | 2074  | 5.40922625659  |
| NM_001039591 | USP9X   | 3426  | 3513  | 7.73115458739  |
| NM_001039591 | USP9X   | 1579  | 1655  | 5.40905274219  |
| NM_001039591 | USP9X   | 3929  | 3989  | 6.4092264925   |
| NM_001039591 | USP9X   | 10531 | 10575 | 5.40922649229  |
| NM_001039591 | USP9X   | 9144  | 9186  | 5.32508728313  |
| NM_001039591 | USP9X   | 5394  | 5477  | 7.40922649251  |
| NM_001039591 | USP9X   | 7642  | 7756  | 7.7311545874   |
| NM_001039591 | USP9X   | 436   | 600   | 9.40922649251  |
| NM_001039591 | USP9X   | 4448  | 4526  | 6.40520889234  |
| NM_001039591 | USP9X   | 7568  | 7635  | 7.40922649251  |
| NM_001039591 | USP9X   | 1217  | 1316  | 7.99418899323  |
| NM_001039591 | USP9X   | 2668  | 2914  | 8.99418899323  |
| NM_001039591 | USP9X   | 4659  | 4721  | 7.4092264925   |
| NM_001039591 | USP9X   | 5050  | 5229  | 8.40922649251  |
| NM_001039591 | USP9X   | 4554  | 4598  | 6.91004978385  |
| NM_001039591 | USP9X   | 4804  | 5025  | 6.99418899323  |
| NM_001039591 | USP9X   | 5261  | 5393  | 8.21658141457  |
| NM_001039591 | USP9X   | 7791  | 7902  | 5.40922649251  |
| NM_001039591 | USP9X   | 6216  | 6267  | 6.40520889234  |
| NM_001039591 | USP9X   | 2128  | 2312  | 8.40922649251  |
| NM_001039591 | USP9X   | 8012  | 8117  | 7.40922649251  |
| NM_001039591 | USP9X   | 7476  | 7566  | 7.40922649251  |
| NM_001039591 | USP9X   | 3183  | 3305  | 6.99418899301  |
| NM_031297    | RNF208  | 256   | 295   | 8.31108366773  |
| NM_018266    | TMEM39A | 307   | 364   | 6.00275084645  |
| NM_018266    | TMEM39A | 797   | 870   | 6.08287245566  |
| NM_018266    | TMEM39A | 2116  | 2175  | 7.67185232064  |
| NM_018266    | TMEM39A | 444   | 549   | 7.08689005584  |
| NM_018266    | TMEM39A | 1199  | 1265  | 7.08689005584  |
| NM_018266    | TMEM39A | 871   | 1072  | 9.25681505728  |
| NM_018266    | TMEM39A | 600   | 691   | 8.89424497789  |
| NM_018266    | TMEM39A | 1387  | 1501  | 8.89424497789  |
| NM_018266    | TMEM39A | 1624  | 1894  | 9.25681505728  |
| NM_018266    | TMEM39A | 107   | 211   | 8.89424497789  |
| NM_001127662 | GSN     | 154   | 225   | 3.19919915826  |
| NM_001127662 | GSN     | 662   | 696   | 0.877270827449 |
| NM_001127662 | GSN     | 2343  | 2413  | 3.19919915826  |
| NM_001127662 | GSN     | 2414  | 2468  | 1.87709731305  |
| NM_001127662 | GSN     | 1698  | 1780  | 3.68462598543  |
| NM_001127662 | GSN     | 1460  | 1584  | 2.46223356409  |
| NM_001127662 | GSN     | 2234  | 2326  | 3.68462598543  |
| NM_001127662 | GSN     | 556   | 656   | 3.46223356409  |
| NM_001127662 | GSN     | 244   | 549   | 5.04719606481  |
| NM_001127662 | GSN     | 1277  | 1433  | 4.33670268201  |

|              |         |       |       |               |
|--------------|---------|-------|-------|---------------|
| NM_001127662 | GSN     | 1985  | 2214  | 5.33670268201 |
| NM_001127662 | GSN     | 838   | 1103  | 4.04719606481 |
| NM_001127662 | GSN     | 1889  | 1977  | 3.19919915826 |
| NM_002647    | PIK3C3  | 1746  | 1842  | 6.17392504628 |
| NM_002646    | PIK3C2B | 697   | 753   | 11.4534480653 |
| NM_002646    | PIK3C2B | 2194  | 2284  | 11.4494371961 |
| NM_002646    | PIK3C2B | 6791  | 6864  | 11.4534480653 |
| NM_002646    | PIK3C2B | 3626  | 3678  | 11.3693155869 |
| NM_002646    | PIK3C2B | 4495  | 4600  | 11.4534547963 |
| NM_002646    | PIK3C2B | 6934  | 7054  | 11.4534547963 |
| NM_002645    | PIK3C2A | 4948  | 5028  | 6.20567770265 |
| NM_002645    | PIK3C2A | 8021  | 8049  | 5.2018338528  |
| NM_002645    | PIK3C2A | 5750  | 5798  | 5.20585145275 |
| NM_002645    | PIK3C2A | 3984  | 4051  | 5.12171224359 |
| NM_002645    | PIK3C2A | 5895  | 5983  | 5.20585144542 |
| NM_002645    | PIK3C2A | 6477  | 6530  | 5.20584472192 |
| NM_002645    | PIK3C2A | 3831  | 3955  | 7.2018338528  |
| NM_002645    | PIK3C2A | 8216  | 8289  | 5.20585145296 |
| NM_002643    | PIGF    | 381   | 493   | 8.65738186118 |
| NM_002643    | PIGF    | 173   | 214   | 7.33143616612 |
| NM_002643    | PIGF    | 620   | 697   | 7.33143616612 |
| NM_002643    | PIGF    | 839   | 884   | 6.33545375874 |
| NM_002643    | PIGF    | 723   | 793   | 8.33545376629 |
| NM_002643    | PIGF    | 512   | 576   | 8.65738186118 |
| NM_002643    | PIGF    | 235   | 329   | 8.65738186118 |
| NM_004489    | GPS2    | 564   | 629   | 6.6608277147  |
| NM_004489    | GPS2    | 258   | 309   | 6.66082795062 |
| NM_004489    | GPS2    | 846   | 915   | 6.6608279504  |
| NM_015303    | VPS8    | 667   | 741   | 8.25967903771 |
| NM_001039375 | C20orf7 | 443   | 485   | 7.08602633635 |
| NM_001039375 | C20orf7 | 604   | 725   | 8.67500643725 |
| NM_001039375 | C20orf7 | 240   | 368   | 7.09004393653 |
| NM_015113    | ZZEF1   | 7739  | 7768  | 7.85284820963 |
| NM_015113    | ZZEF1   | 9099  | 9147  | 8.85284820963 |
| NM_015113    | ZZEF1   | 3159  | 3205  | 7.93681366869 |
| NM_015113    | ZZEF1   | 1813  | 1848  | 8.85284820963 |
| NM_015113    | ZZEF1   | 1663  | 1721  | 8.85284820963 |
| NM_015113    | ZZEF1   | 3900  | 3981  | 9.52194991218 |
| NM_015113    | ZZEF1   | 1175  | 1226  | 9.51793231956 |
| NM_015113    | ZZEF1   | 2535  | 2616  | 10.2587417636 |
| NM_015113    | ZZEF1   | 4745  | 4784  | 8.93698068796 |
| NM_015113    | ZZEF1   | 8613  | 8677  | 7.93698718309 |
| NM_015113    | ZZEF1   | 8734  | 8828  | 8.93681366869 |
| NM_015113    | ZZEF1   | 9841  | 9964  | 8.93698741901 |
| NM_015113    | ZZEF1   | 5113  | 5174  | 8.93681366869 |
| NM_015113    | ZZEF1   | 9744  | 9794  | 7.93296981884 |
| NM_015113    | ZZEF1   | 5204  | 5262  | 9.52194318868 |
| NM_015113    | ZZEF1   | 7486  | 7551  | 8.93296981884 |
| NM_015113    | ZZEF1   | 10492 | 10557 | 7.93698718309 |
| NM_015113    | ZZEF1   | 2091  | 2127  | 8.85284820963 |



|              |          |      |      |               |               |
|--------------|----------|------|------|---------------|---------------|
| NM_015113    | ZZEF1    | 1585 | 1656 | 9.52194968381 |               |
| NM_015113    | ZZEF1    | 5558 | 5630 | 7.93698718309 |               |
| NM_015113    | ZZEF1    | 8366 | 8468 | 8.93698741146 |               |
| NM_015113    | ZZEF1    | 1309 | 1413 | 7.93698741901 |               |
| NM_015113    | ZZEF1    | 4890 | 5016 | 10.936987419  |               |
| NM_015113    | ZZEF1    | 5362 | 5442 | 10.5219499197 |               |
| NM_015113    | ZZEF1    | 3206 | 3367 | 10.5219499197 |               |
| NM_015112    | MAST2    | 2278 | 2344 | 7.25174622304 |               |
| NM_015112    | MAST2    | 2456 | 2527 | 7.33588543242 |               |
| NM_015112    | MAST2    | 2114 | 2157 | 6.3357116821  |               |
| NM_015112    | MAST2    | 2613 | 2680 | 7.92084793314 |               |
| NM_015112    | MAST2    | 2686 | 2782 | 6.33588543242 |               |
| NM_015112    | MAST2    | 3515 | 3573 | 6.33186783225 |               |
| NM_015112    | MAST2    | 5436 | 5511 | 6.3358851965  |               |
| NM_015112    | MAST2    | 1898 | 2017 | 8.33588543242 |               |
| NM_015446    | AHCTF1   | 1316 | 1388 | 6.34845919518 |               |
| NM_015446    | AHCTF1   | 941  | 1024 | 5.76332295169 |               |
| NM_015446    | AHCTF1   | 874  | 936  | 6.34845247168 |               |
| NM_015446    | AHCTF1   | 8015 | 8072 | 4.75947910184 |               |
| NM_015446    | AHCTF1   | 1144 | 1198 | 5.75947910184 |               |
| NM_015446    | AHCTF1   | 1566 | 1619 | 4.76349646609 |               |
| NM_015446    | AHCTF1   | 3670 | 3725 | 5.76332295169 |               |
| NM_015446    | AHCTF1   | 2435 | 2531 | 6.34845920273 |               |
| NM_015446    | AHCTF1   | 1391 | 1455 | 5.76349646609 |               |
| NM_015446    | AHCTF1   | 2207 | 2264 | 5.76349670201 |               |
| NM_015446    | AHCTF1   | 3293 | 3346 | 4.67935749263 |               |
| NM_015446    | AHCTF1   | 3249 | 3283 | 6.34845896681 |               |
| NM_015446    | AHCTF1   | 2265 | 2367 | 7.76349670201 |               |
| NM_015446    | AHCTF1   | 116  | 171  | 6.34845920251 |               |
| NM_015446    | AHCTF1   | 2119 | 2166 | 6.34845896681 |               |
| NM_015446    | AHCTF1   | 1753 | 1832 | 6.34845920273 |               |
| NM_015446    | AHCTF1   | 2536 | 2603 | 6.26431999335 |               |
| NM_015446    | AHCTF1   | 2832 | 2886 | 4.76349669446 |               |
| NM_015446    | AHCTF1   | 401  | 473  | 6.34845919518 |               |
| NM_015446    | AHCTF1   | 581  | 657  | 5.76348997096 |               |
| NM_015446    | AHCTF1   | 3008 | 3090 | 6.76349670201 |               |
| NM_015446    | AHCTF1   | 4535 | 4684 | 7.0854247969  |               |
| NM_015446    | AHCTF1   | 1637 | 1734 | 7.0854247969  |               |
| NM_015446    | AHCTF1   | 185  | 280  | 6.34845920273 |               |
| NM_015446    | AHCTF1   | 4138 | 4298 | 4.76349670201 |               |
| NM_015446    | AHCTF1   | 4812 | 4940 | 6.34845920273 |               |
| NM_001006607 | LRR37A2  |      | 4315 | 4359          | 8.84759346758 |
| NM_001006607 | LRR37A2  |      | 1440 | 1529          | 8.84357610333 |
| NM_015443    | KIAA1267 |      | 148  | 190           | 8.09028752311 |
| NM_015443    | KIAA1267 |      | 1502 | 1575          | 8.09028752311 |
| NM_015443    | KIAA1267 |      | 3095 | 3141          | 7.35331519811 |
| NM_015443    | KIAA1267 |      | 4521 | 4555          | 5.68422021906 |
| NM_015443    | KIAA1267 |      | 574  | 644           | 7.76835942845 |
| NM_015443    | KIAA1267 |      | 3652 | 3736          | 7.7683594209  |
| NM_015443    | KIAA1267 |      | 4414 | 4508          | 5.76835942845 |

|              |              |      |      |               |
|--------------|--------------|------|------|---------------|
| NM_015443    | KIAA1267     | 3737 | 3814 | 6.68422021906 |
| NM_015443    | KIAA1267     | 381  | 453  | 5.76835942845 |
| NM_015443    | KIAA1267     | 953  | 1028 | 7.35332192917 |
| NM_015443    | KIAA1267     | 4025 | 4173 | 6.76835942845 |
| NM_015443    | KIAA1267     | 734  | 937  | 6.76835942845 |
| NM_015443    | KIAA1267     | 40   | 129  | 6.76835942845 |
| NM_015443    | KIAA1267     | 1123 | 1169 | 7.34930432899 |
| NM_015114    | ANKLE2 531   | 579  |      | 5.25168798567 |
| NM_015114    | ANKLE2 2582  | 2651 |      | 6.2516944808  |
| NM_015114    | ANKLE2 2354  | 2426 |      | 6.83665721744 |
| NM_015114    | ANKLE2 3830  | 3942 |      | 7.83665721744 |
| NM_015114    | ANKLE2 3494  | 3579 |      | 6.83665721744 |
| NM_015114    | ANKLE2 3696  | 3826 |      | 7.83665721744 |
| NM_015114    | ANKLE2 2257  | 2354 |      | 8.25169471672 |
| NM_015114    | ANKLE2 2894  | 2948 |      | 6.83665698152 |
| NM_015114    | ANKLE2 4117  | 4171 |      | 5.2516947165  |
| NM_015114    | ANKLE2 272   | 376  |      | 8.05904963878 |
| NM_015114    | ANKLE2 4349  | 4413 |      | 5.24767711655 |
| NM_015114    | ANKLE2 1801  | 1951 |      | 8.05904963878 |
| NM_015114    | ANKLE2 3133  | 3214 |      | 5.25168798567 |
| NM_015114    | ANKLE2 1343  | 1532 |      | 8.57362281161 |
| NM_015114    | ANKLE2 2663  | 2774 |      | 6.25169471672 |
| NM_015114    | ANKLE2 809   | 918  |      | 7.25169471672 |
| NM_015114    | ANKLE2 1170  | 1336 |      | 8.57362281161 |
| NM_015114    | ANKLE2 730   | 790  |      | 5.24767711655 |
| NM_015114    | ANKLE2 1992  | 2137 |      | 6.25169471672 |
| NM_015114    | ANKLE2 1005  | 1121 |      | 7.57362281161 |
| NM_015114    | ANKLE2 118   | 197  |      | 5.25169470917 |
| NM_001031689 | PLAA 1347    | 1406 |      | 5.08078691609 |
| NM_001031689 | PLAA 985     | 1033 |      | 6.08079363959 |
| NM_001031689 | PLAA 1125    | 1216 |      | 7.40272174203 |
| NM_001031689 | PLAA 1238    | 1281 |      | 5.08078691609 |
| NM_001031689 | PLAA 2781    | 2819 |      | 5.07677604697 |
| NM_001031689 | PLAA 2089    | 2164 |      | 6.08079364714 |
| NM_001031689 | PLAA 755     | 941  |      | 8.40272174203 |
| NM_012203    | GRHPR 880    | 950  |      | 5.58252158378 |
| NM_012203    | GRHPR 784    | 870  |      | 6.16346649188 |
| NM_012203    | GRHPR 275    | 394  |      | 4.58252158378 |
| NM_001031685 | TP53BP2 1683 | 1751 |      | 7.20790860663 |
| NM_001031685 | TP53BP2 3530 | 3608 |      | 6.2079085993  |
| NM_001031685 | TP53BP2 438  | 513  |      | 7.79287110757 |
| NM_001031685 | TP53BP2 2560 | 2623 |      | 6.20773485653 |
| NM_001031685 | TP53BP2 2755 | 2796 |      | 7.20389100668 |
| NM_001031685 | TP53BP2 2305 | 2361 |      | 7.20790837093 |
| NM_001031685 | TP53BP2 1206 | 1248 |      | 7.20773485653 |
| NM_001031685 | TP53BP2 640  | 725  |      | 6.20790860685 |
| NM_001031685 | TP53BP2 1842 | 1912 |      | 7.20790860685 |
| NM_001031685 | TP53BP2 3091 | 3137 |      | 7.7888535074  |
| NM_001031685 | TP53BP2 2100 | 2147 |      | 6.20773485653 |
| NM_001031685 | TP53BP2 379  | 436  |      | 8.20790860663 |

|              |          |      |       |               |               |
|--------------|----------|------|-------|---------------|---------------|
| NM_001031685 | TP53BP2  | 1552 | 1596  | 7.20790837093 |               |
| NM_001031685 | TP53BP2  | 4294 | 4378  | 6.20773485653 |               |
| NM_001031685 | TP53BP2  | 2630 | 2753  | 8.52983670174 |               |
| NM_001031685 | TP53BP2  | 523  | 621   | 7.79287110757 |               |
| NM_001031685 | TP53BP2  | 3912 | 3989  | 6.20773485653 |               |
| NM_001031685 | TP53BP2  | 3238 | 3355  | 7.79287110757 |               |
| NM_001031685 | TP53BP2  | 3642 | 3741  | 7.79287110757 |               |
| NM_001031684 | SRSF7    | 162  | 215   | 3.41933722849 |               |
| NM_001031684 | SRSF7    | 972  | 1105  | 5.41951097881 |               |
| NM_001031684 | SRSF7    | 1106 | 1171  | 4.41549337864 |               |
| NM_001031684 | SRSF7    | 716  | 902   | 7.11995069695 |               |
| NM_001031684 | SRSF7    | 234  | 687   | 8.00447347953 |               |
| NM_033296    | MRFAP1   | 596  | 1002  | 6.98136299201 |               |
| NM_033296    | MRFAP1   | 1083 | 2111  | 9.05771387814 |               |
| NM_033290    | MID1     | 1881 | 1928  | 10.1141787733 |               |
| NM_033290    | MID1     | 683  | 764   | 9.11435228773 |               |
| NM_033290    | MID1     | 1993 | 2125  | 10.6993150244 |               |
| NM_033290    | MID1     | 4517 | 4593  | 10.1103349235 |               |
| NM_001015052 | MPG      | 806  | 895   | 7.32901148547 |               |
| NM_001015052 | MPG      | 756  | 800   | 6.24487227609 |               |
| NM_001015052 | MPG      | 557  | 659   | 9.13636640753 |               |
| NM_001015055 | RTKN     | 601  | 695   | 6.51744187013 |               |
| NM_001015055 | RTKN     | 458  | 520   | 6.93247936941 |               |
| NM_001015055 | RTKN     | 2076 | 2125  | 4.93247936919 |               |
| NM_001015055 | RTKN     | 1910 | 1950  | 4.9323056191  |               |
| NM_001015055 | RTKN     | 1318 | 1362  | 4.84834016003 |               |
| NM_001015055 | RTKN     | 921  | 1004  | 5.9324791335  |               |
| NM_001015055 | RTKN     | 1137 | 1177  | 4.93247263836 |               |
| NM_001015055 | RTKN     | 1990 | 2071  | 4.93247936941 |               |
| NM_001015055 | RTKN     | 1363 | 1426  | 6.93247936941 |               |
| NM_001109662 | C12orf51 |      | 8990  | 9050          | 7.96245557555 |
| NM_001109662 | C12orf51 |      | 2162  | 2222          | 8.9586117257  |
| NM_001109662 | C12orf51 |      | 7432  | 7492          | 9.54357422642 |
| NM_001109662 | C12orf51 |      | 1470  | 1530          | 9.46345261721 |
| NM_001109662 | C12orf51 |      | 10    | 75            | 7.96262931832 |
| NM_001109662 | C12orf51 |      | 126   | 284           | 7.96262932587 |
| NM_001109662 | C12orf51 |      | 464   | 549           | 7.87849011648 |
| NM_001109662 | C12orf51 |      | 13883 | 13960         | 7.96262259481 |
| NM_181800    | UBE2C    | 65   | 142   | 8.97324851053 |               |
| NM_181800    | UBE2C    | 592  | 729   | 9.86633330661 |               |
| NM_181800    | UBE2C    | 345  | 542   | 10.2533564297 |               |
| NM_181806    | AASDH    | 894  | 968   | 10.6716187069 |               |
| NM_181806    | AASDH    | 291  | 364   | 10.0826453371 |               |
| NM_181806    | AASDH    | 1455 | 1521  | 9.08264533709 |               |
| NM_004486    | GOLGA2   | 364  | 439   | 4.24881222417 |               |
| NM_004486    | GOLGA2   | 3421 | 3538  | 4.24898597448 |               |
| NM_052916    | RNF157   | 2206 | 2268  | 10.6346428193 |               |
| NM_052916    | RNF157   | 1082 | 1141  | 12.2197788344 |               |
| NM_052916    | RNF157   | 922  | 987   | 12.6348165621 |               |
| NM_052916    | RNF157   | 195  | 264   | 10.6346428193 |               |

|              |         |      |      |               |
|--------------|---------|------|------|---------------|
| NM_052916    | RNF157  | 1884 | 2002 | 12.9567446645 |
| NM_052916    | RNF157  | 2397 | 2605 | 13.2197790703 |
| NM_052916    | RNF157  | 2285 | 2394 | 12.9567446645 |
| NM_052916    | RNF157  | 814  | 889  | 11.6348165694 |
| NM_052917    | GALNT13 | 1650 | 1694 | 11.1017771973 |
| NM_052917    | GALNT13 | 664  | 721  | 11.1057880664 |
| NM_052917    | GALNT13 | 1807 | 1845 | 11.1017771973 |
| NM_052917    | GALNT13 | 1297 | 1392 | 11.1057947974 |
| NM_001006613 | WBP5    | 818  | 912  | 5.51257982776 |
| NM_001006613 | WBP5    | 596  | 759  | 7.83450792264 |
| NM_001162497 | LPAR6   | 2160 | 2229 | 7.3686614901  |
| NM_001006616 | TSPAN17 | 363  | 440  | 10.1391559118 |
| NM_014317    | PDSS1   | 1084 | 1145 | 10.7998853773 |
| NM_001343    | DAB2    | 1233 | 1298 | 8.19515439404 |
| NM_001343    | DAB2    | 526  | 560  | 6.61018516249 |
| NM_001343    | DAB2    | 4156 | 4208 | 8.61018516249 |
| NM_001343    | DAB2    | 2232 | 2274 | 6.61001814322 |
| NM_001343    | DAB2    | 3103 | 3158 | 6.60617429337 |
| NM_001343    | DAB2    | 799  | 862  | 6.52605268416 |
| NM_001343    | DAB2    | 254  | 310  | 8.19515439404 |
| NM_001343    | DAB2    | 3956 | 4018 | 6.61019188599 |
| NM_001343    | DAB2    | 2876 | 2989 | 8.61019189354 |
| NM_001343    | DAB2    | 2443 | 2514 | 7.61019189354 |
| NM_001343    | DAB2    | 1119 | 1202 | 8.61019189353 |
| NM_001343    | DAB2    | 1518 | 1595 | 7.61001814322 |
| NM_001343    | DAB2    | 1850 | 1994 | 7.61019189354 |
| NM_001343    | DAB2    | 2606 | 2681 | 8.19515439426 |
| NM_001347    | DGKQ    | 4450 | 4510 | 9.01140593103 |
| NM_001347    | DGKQ    | 522  | 588  | 10.5925245819 |
| NM_001344    | DAD1    | 39   | 360  | 7.48154143854 |
| NM_001344    | DAD1    | 361  | 569  | 6.89657893782 |
| NM_001344    | DAD1    | 581  | 686  | 4.15961334365 |
| NM_001349    | DARS    | 1281 | 1338 | 1.62031982704 |
| NM_001349    | DARS    | 331  | 387  | 1.62031959112 |
| NM_001349    | DARS    | 1370 | 1453 | 3.62031982704 |
| NM_001349    | DARS    | 632  | 678  | 2.62014607672 |
| NM_001349    | DARS    | 1230 | 1271 | 1.53618061765 |
| NM_001349    | DARS    | 540  | 617  | 3.20528209184 |
| NM_001349    | DARS    | 1934 | 1987 | 1.62031981949 |
| NM_001349    | DARS    | 988  | 1190 | 4.94224792193 |
| NM_001349    | DARS    | 1612 | 1707 | 3.94224792193 |
| NM_001348    | DAPK3   | 315  | 390  | 7.70687513519 |
| NM_001348    | DAPK3   | 645  | 722  | 5.70687513519 |
| NM_001348    | DAPK3   | 465  | 580  | 7.29183763591 |
| NM_001348    | DAPK3   | 112  | 200  | 7.29183763591 |
| NM_022078    | GPATCH3 | 1091 | 1181 | 8.09907820811 |
| NM_022075    | CERS2   | 2417 | 2470 | 5.3037527532  |
| NM_022075    | CERS2   | 2278 | 2365 | 5.3037527532  |
| NM_022075    | CERS2   | 2061 | 2266 | 9.24235220854 |
| NM_022075    | CERS2   | 1469 | 2051 | 9.88871525392 |

|              |         |      |      |               |
|--------------|---------|------|------|---------------|
| NM_022075    | CERS2   | 367  | 1464 | 11.5066928119 |
| NM_022072    | NSUN3   | 986  | 1031 | 10.1907172632 |
| NM_022070    | HEATR6  | 2600 | 2694 | 7.78364757602 |
| NM_021252    | RAB18   | 670  | 770  | 6.22697940645 |
| NM_001024845 | SLC6A9  | 2670 | 2730 | 8.0118474212  |
| NM_001024845 | SLC6A9  | 504  | 536  | 8.01569127105 |
| NM_021259    | TMEM8A  | 3556 | 3612 | 7.56773362715 |
| NM_021259    | TMEM8A  | 779  | 823  | 5.8986386481  |
| NM_021259    | TMEM8A  | 969  | 1025 | 7.5677403582  |
| NM_021259    | TMEM8A  | 276  | 344  | 6.97876025731 |
| NM_021259    | TMEM8A  | 2204 | 2301 | 7.56774035065 |
| NM_021259    | TMEM8A  | 1911 | 1977 | 7.5677403582  |
| NM_021259    | TMEM8A  | 3241 | 3296 | 5.98277784993 |
| NM_021259    | TMEM8A  | 3329 | 3381 | 5.98277785747 |
| NM_021259    | TMEM8A  | 616  | 765  | 6.98277785748 |
| NM_021259    | TMEM8A  | 2006 | 2122 | 8.79013277954 |
| NM_021259    | TMEM8A  | 2854 | 2898 | 6.8986386481  |
| NM_021259    | TMEM8A  | 2675 | 2827 | 7.98277785748 |
| NM_021259    | TMEM8A  | 1697 | 1759 | 5.98277785748 |
| NM_021259    | TMEM8A  | 3045 | 3132 | 8.30470595215 |
| NM_021259    | TMEM8A  | 1194 | 1319 | 7.98277785748 |
| NM_021259    | TMEM8A  | 2379 | 2592 | 8.98277785748 |
| NM_021259    | TMEM8A  | 1335 | 1673 | 10.6266340473 |
| NM_021258    | IL22RA1 | 559  | 602  | 8.42815697504 |
| NM_021258    | IL22RA1 | 749  | 802  | 8.51212243411 |
| NM_021258    | IL22RA1 | 199  | 286  | 9.51229618443 |
| NM_194314    | ZBTB41  | 1859 | 1911 | 10.1415073977 |
| NM_194314    | ZBTB41  | 1963 | 2027 | 8.56038874679 |
| NM_194314    | ZBTB41  | 1650 | 1732 | 10.5605622612 |
| NM_005053    | RAD23A  | 1101 | 1137 | 3.98484944405 |
| NM_005053    | RAD23A  | 1153 | 1230 | 6.30695128926 |
| NM_005053    | RAD23A  | 413  | 460  | 5.56997896404 |
| NM_005053    | RAD23A  | 569  | 699  | 6.98502319437 |
| NM_005053    | RAD23A  | 312  | 391  | 5.56998569509 |
| NM_005053    | RAD23A  | 114  | 311  | 6.79237811643 |
| NM_005053    | RAD23A  | 1491 | 1525 | 3.98484944405 |
| NM_005053    | RAD23A  | 1646 | 1681 | 3.90088398499 |
| NM_012469    | PRPF6   | 1551 | 1590 | 4.56296972969 |
| NM_012469    | PRPF6   | 1380 | 1461 | 4.98202482915 |
| NM_012469    | PRPF6   | 1266 | 1356 | 3.98202482892 |
| NM_012469    | PRPF6   | 2248 | 2334 | 3.98185107883 |
| NM_012469    | PRPF6   | 471  | 541  | 2.98185107883 |
| NM_012469    | PRPF6   | 2459 | 2534 | 2.98202482915 |
| NM_012469    | PRPF6   | 2401 | 2456 | 2.98185107883 |
| NM_012469    | PRPF6   | 117  | 192  | 3.98201809809 |
| NM_012469    | PRPF6   | 341  | 391  | 2.89788561976 |
| NM_012469    | PRPF6   | 833  | 946  | 4.98202482915 |
| NM_005052    | RAC3    | 604  | 652  | 10.1039257601 |
| NM_005052    | RAC3    | 214  | 395  | 12.3579899709 |
| NM_005052    | RAC3    | 726  | 806  | 9.18806496947 |

|           |          |      |      |               |               |
|-----------|----------|------|------|---------------|---------------|
| NM_005052 | RAC3     | 439  | 600  | 10.7730274702 |               |
| NM_012463 | ATP6V0A2 |      | 1649 | 1745          | 11.743656598  |
| NM_012463 | ATP6V0A2 |      | 1454 | 1522          | 10.936301676  |
| NM_012463 | ATP6V0A2 |      | 2259 | 2303          | 8.93612792566 |
| NM_012463 | ATP6V0A2 |      | 2782 | 2823          | 8.93612792566 |
| NM_012463 | ATP6V0A2 |      | 2454 | 2494          | 8.85216246659 |
| NM_012463 | ATP6V0A2 |      | 757  | 841           | 11.5212641767 |
| NM_012463 | ATP6V0A2 |      | 1993 | 2080          | 11.936301676  |
| NM_012463 | ATP6V0A2 |      | 2380 | 2433          | 10.5212641767 |
| NM_012463 | ATP6V0A2 |      | 2594 | 2671          | 8.93630167597 |
| NM_012463 | ATP6V0A2 |      | 529  | 706           | 11.2582297709 |
| NM_012463 | ATP6V0A2 |      | 1782 | 1981          | 12.1062266774 |
| NM_012463 | ATP6V0A2 |      | 1079 | 1207          | 10.936301676  |
| NM_012460 | TIMM9    | 666  | 762  | 4.18320605369 |               |
| NM_014435 | NAAA     | 570  | 662  | 8.15371346469 |               |
| NM_014435 | NAAA     | 295  | 329  | 7.14969586451 |               |
| NM_014435 | NAAA     | 357  | 411  | 8.47563482852 |               |
| NM_014435 | NAAA     | 456  | 544  | 7.15371322877 |               |
| NM_014435 | NAAA     | 163  | 260  | 7.7386759654  |               |
| NM_144703 | LSM14B   | 419  | 465  | 4.76009416756 |               |
| NM_144703 | LSM14B   | 2346 | 2432 | 3.84422664589 |               |
| NM_144703 | LSM14B   | 1014 | 1090 | 3.84405962663 |               |
| NM_144703 | LSM14B   | 1488 | 1569 | 4.84423337694 |               |
| NM_174917 | ACSF3    | 1761 | 1821 | 7.92240351301 |               |
| NM_174917 | ACSF3    | 261  | 357  | 9.92642111318 |               |
| NM_174916 | UBR1     | 4527 | 4568 | 6.76092445276 |               |
| NM_174916 | UBR1     | 6719 | 6759 | 7.76092445276 |               |
| NM_174916 | UBR1     | 2775 | 2838 | 7.68080284355 |               |
| NM_174913 | C14orf21 |      | 1982 | 2045          | 7.43517443237 |
| NM_174913 | C14orf21 |      | 715  | 770           | 5.8502119241  |
| NM_174913 | C14orf21 |      | 360  | 439           | 6.85021169573 |
| NM_174913 | C14orf21 |      | 1455 | 1501          | 6.76607272226 |
| NM_174913 | C14orf21 |      | 1691 | 1777          | 7.43517442482 |
| NM_174913 | C14orf21 |      | 3561 | 3603          | 5.76607272226 |
| NM_174913 | C14orf21 |      | 814  | 939           | 7.43517443237 |
| NM_174913 | C14orf21 |      | 961  | 1047          | 7.85020520059 |
| NM_174913 | C14orf21 |      | 2797 | 2886          | 7.43517443237 |
| NM_174913 | C14orf21 |      | 4969 | 5093          | 6.85021193165 |
| NM_133450 | ANKS3    | 1619 | 1671 | 9.50008777603 |               |
| NM_178026 | GGT7     | 827  | 922  | 8.17506112042 |               |
| NM_178026 | GGT7     | 1544 | 1625 | 8.17506112042 |               |
| NM_178026 | GGT7     | 555  | 678  | 10.1750611204 |               |
| NM_178026 | GGT7     | 1922 | 2022 | 9.17506112042 |               |
| NM_014430 | CIDEB    | 1371 | 1422 | 3.51619580133 |               |
| NM_014430 | CIDEB    | 1468 | 1506 | 3.51235195148 |               |
| NM_014430 | CIDEB    | 1826 | 2000 | 5.51636955165 |               |
| NM_014430 | CIDEB    | 1586 | 1690 | 5.51636955165 |               |
| NM_004731 | SLC16A7  | 5065 | 5210 | 13.2665140672 |               |
| NM_004731 | SLC16A7  | 5461 | 5570 | 14.588442162  |               |
| NM_004731 | SLC16A7  | 6559 | 6633 | 13.8514765679 |               |

|           |               |       |               |
|-----------|---------------|-------|---------------|
| NM_004731 | SLC16A7 11011 | 11074 | 12.2665140672 |
| NM_004731 | SLC16A7 7496  | 7570  | 13.8514765679 |
| NM_004731 | SLC16A7 4312  | 4404  | 13.588442162  |
| NM_004731 | SLC16A7 8152  | 8181  | 11.262496467  |
| NM_004731 | SLC16A7 2910  | 2984  | 13.2665140672 |
| NM_004731 | SLC16A7 879   | 943   | 13.2665140672 |
| NM_004731 | SLC16A7 2410  | 2490  | 12.2665140672 |
| NM_004731 | SLC16A7 7606  | 7671  | 11.2665140672 |
| NM_004731 | SLC16A7 3039  | 3119  | 12.8514765679 |
| NM_004731 | SLC16A7 4812  | 4868  | 13.2665140672 |
| NM_004731 | SLC16A7 8879  | 8909  | 12.8514765679 |
| NM_004731 | SLC16A7 3309  | 3363  | 12.8513028176 |
| NM_004731 | SLC16A7 1878  | 1955  | 13.2665140672 |
| NM_004731 | SLC16A7 445   | 490   | 13.2665140672 |
| NM_004731 | SLC16A7 784   | 854   | 13.2665140672 |
| NM_004731 | SLC16A7 4882  | 4988  | 12.8514765679 |
| NM_004731 | SLC16A7 263   | 298   | 12.2665140596 |
| NM_004731 | SLC16A7 4198  | 4270  | 13.2665140672 |
| NM_004731 | SLC16A7 4750  | 4811  | 13.588442162  |
| NM_004731 | SLC16A7 9182  | 9275  | 12.2665140672 |
| NM_004731 | SLC16A7 4618  | 4714  | 12.8514765679 |
| NM_004731 | SLC16A7 181   | 253   | 12.8514765679 |
| NM_004731 | SLC16A7 7993  | 8031  | 11.262496467  |
| NM_004731 | SLC16A7 3747  | 3787  | 11.2665073361 |
| NM_004731 | SLC16A7 7209  | 7331  | 14.588442162  |
| NM_004731 | SLC16A7 3802  | 3902  | 12.8514765679 |
| NM_004731 | SLC16A7 4123  | 4196  | 12.2665140672 |
| NM_004731 | SLC16A7 5896  | 5944  | 12.262496467  |
| NM_004731 | SLC16A7 8753  | 8798  | 11.2665138312 |
| NM_004731 | SLC16A7 9647  | 9708  | 12.1823748578 |
| NM_004731 | SLC16A7 1554  | 1652  | 12.851476332  |
| NM_004731 | SLC16A7 494   | 525   | 12.262496467  |
| NM_004731 | SLC16A7 7080  | 7208  | 14.0738689892 |
| NM_004731 | SLC16A7 5760  | 5839  | 12.8514765679 |
| NM_004731 | SLC16A7 9994  | 10148 | 13.588442162  |
| NM_004731 | SLC16A7 6433  | 6551  | 14.7259456858 |
| NM_004731 | SLC16A7 3511  | 3707  | 14.588442162  |
| NM_004731 | SLC16A7 8327  | 8405  | 12.8514765679 |
| NM_004731 | SLC16A7 335   | 435   | 13.8514765679 |
| NM_004731 | SLC16A7 6929  | 7021  | 14.0738689892 |
| NM_004731 | SLC16A7 11157 | 11289 | 13.588442162  |
| NM_004731 | SLC16A7 5570  | 5679  | 12.2665140672 |
| NM_004731 | SLC16A7 10196 | 10367 | 13.8514765679 |
| NM_004731 | SLC16A7 2814  | 2910  | 13.2665140672 |
| NM_004731 | SLC16A7 2321  | 2408  | 12.2665140672 |
| NM_004731 | SLC16A7 8189  | 8261  | 13.2665140672 |
| NM_004731 | SLC16A7 10893 | 10988 | 12.8514765679 |
| NM_004731 | SLC16A7 959   | 1549  | 17.6240660718 |
| NM_004731 | SLC16A7 3905  | 4086  | 14.9669537853 |
| NM_004731 | SLC16A7 10579 | 10710 | 13.2665140672 |

|           |         |       |       |               |
|-----------|---------|-------|-------|---------------|
| NM_004731 | SLC16A7 | 11361 | 11685 | 15.1734046628 |
| NM_004731 | SLC16A7 | 8608  | 8750  | 12.8514765679 |
| NM_004731 | SLC16A7 | 576   | 783   | 15.5144415806 |
| NM_004731 | SLC16A7 | 1771  | 1857  | 13.8514765679 |
| NM_004731 | SLC16A7 | 9815  | 9883  | 12.8514765679 |
| NM_004731 | SLC16A7 | 6686  | 6843  | 15.2665140672 |
| NM_004731 | SLC16A7 | 7686  | 7762  | 11.2665140672 |
| NM_004730 | ETF1    | 3503  | 3551  | 5.34117744085 |
| NM_004730 | ETF1    | 705   | 768   | 3.75621470421 |
| NM_004730 | ETF1    | 1594  | 1663  | 4.75620820907 |
| NM_004730 | ETF1    | 2970  | 3056  | 4.75621494013 |
| NM_004730 | ETF1    | 3249  | 3281  | 2.67207573074 |
| NM_004730 | ETF1    | 484   | 546   | 5.75621494013 |
| NM_004730 | ETF1    | 1804  | 1844  | 2.75621470421 |
| NM_004730 | ETF1    | 1938  | 1983  | 2.75620820907 |
| NM_004730 | ETF1    | 1879  | 1909  | 3.75219733996 |
| NM_004730 | ETF1    | 613   | 693   | 5.56356986219 |
| NM_004730 | ETF1    | 2247  | 2391  | 6.34117744085 |
| NM_004730 | ETF1    | 3072  | 3221  | 5.75621494013 |
| NM_004730 | ETF1    | 2011  | 2089  | 4.34117744063 |
| NM_004730 | ETF1    | 3623  | 3672  | 2.75219733996 |
| NM_004730 | ETF1    | 332   | 482   | 5.75621494013 |
| NM_004730 | ETF1    | 808   | 956   | 6.34117744085 |
| NM_004730 | ETF1    | 1256  | 1411  | 5.75621494013 |
| NM_004730 | ETF1    | 173   | 289   | 3.75621494013 |
| NM_004730 | ETF1    | 1414  | 1522  | 4.34117744085 |
| NM_004730 | ETF1    | 987   | 1242  | 6.56356986219 |
| NM_004730 | ETF1    | 2668  | 2745  | 3.75219733996 |
| NM_004733 | SLC33A1 | 1514  | 1559  | 10.3099305149 |
| NM_004733 | SLC33A1 | 1217  | 1342  | 10.3099305149 |
| NM_004733 | SLC33A1 | 241   | 371   | 10.5025755928 |
| NM_004733 | SLC33A1 | 2397  | 2499  | 9.82450368769 |
| NM_004733 | SLC33A1 | 374   | 417   | 9.0873643432  |
| NM_004733 | SLC33A1 | 515   | 617   | 9.5025755928  |
| NM_004733 | SLC33A1 | 435   | 500   | 9.50257535688 |
| NM_004733 | SLC33A1 | 662   | 740   | 9.50257558525 |
| NM_004733 | SLC33A1 | 2068  | 2151  | 9.82450368769 |
| NM_004733 | SLC33A1 | 1387  | 1495  | 10.0875380935 |
| NM_004733 | SLC33A1 | 2501  | 2649  | 9.08753809352 |
| NM_004733 | SLC33A1 | 1815  | 2052  | 12.0875380935 |
| NM_004733 | SLC33A1 | 1610  | 1727  | 10.6725005942 |
| NM_004733 | SLC33A1 | 825   | 1210  | 12.3605565879 |
| NM_004735 | LRRFIP1 | 3483  | 3533  | 2.05057077316 |
| NM_005420 | SULT1E1 | 83    | 221   | 10.3649427316 |
| NM_005420 | SULT1E1 | 413   | 570   | 11.3649427316 |
| NM_004739 | MTA2    | 1549  | 1636  | 8.28063108821 |
| NM_004739 | MTA2    | 970   | 1047  | 8.01759668238 |
| NM_004739 | MTA2    | 705   | 795   | 8.50302350955 |
| NM_004739 | MTA2    | 74    | 126   | 5.61152937811 |
| NM_004739 | MTA2    | 2920  | 2991  | 5.69566858749 |



|              |        |      |      |               |
|--------------|--------|------|------|---------------|
| NM_004739    | MTA2   | 525  | 582  | 5.69165098732 |
| NM_004739    | MTA2   | 798  | 928  | 8.86559358893 |
| NM_004739    | MTA2   | 1660 | 1796 | 5.69566858749 |
| NM_004739    | MTA2   | 1428 | 1493 | 7.69165098732 |
| NM_004739    | MTA2   | 1866 | 1984 | 8.28063108821 |
| NM_004739    | MTA2   | 1148 | 1280 | 8.28063108821 |
| NM_004739    | MTA2   | 1047 | 1124 | 7.69566858749 |
| NM_004739    | MTA2   | 2513 | 2572 | 5.69165098732 |
| NM_004739    | MTA2   | 2582 | 2659 | 5.69566858727 |
| NM_004739    | MTA2   | 2323 | 2427 | 8.01759668238 |
| NM_004739    | MTA2   | 366  | 508  | 9.28063108821 |
| NM_004086    | COCH   | 1502 | 1548 | 7.02904885965 |
| NM_004086    | COCH   | 1559 | 1635 | 9.72948858534 |
| NM_004086    | COCH   | 1242 | 1304 | 9.35097696209 |
| NM_004086    | COCH   | 1307 | 1378 | 8.02904886719 |
| NM_004086    | COCH   | 414  | 497  | 7.0290488672  |
| NM_004086    | COCH   | 1422 | 1502 | 8.0290488672  |
| NM_004086    | COCH   | 1638 | 1727 | 8.83640378926 |
| NM_004086    | COCH   | 505  | 714  | 10.42136629   |
| NM_004086    | COCH   | 767  | 802  | 7.02503126703 |
| NM_004086    | COCH   | 1729 | 1776 | 6.02887511688 |
| NM_004086    | COCH   | 67   | 160  | 8.61401136792 |
| NM_004086    | COCH   | 167  | 395  | 9.72948858534 |
| NM_004086    | COCH   | 817  | 1226 | 11.1989738686 |
| NM_004086    | COCH   | 1908 | 2021 | 6.0290488672  |
| NM_001201545 | RBM15  | 2203 | 2286 | 8.8255499958  |
| NM_001201545 | RBM15  | 1800 | 1843 | 9.4105122606  |
| NM_001201545 | RBM15  | 2508 | 2575 | 7.82153239563 |
| NM_001201545 | RBM15  | 1466 | 1533 | 9.40649489635 |
| NM_001128126 | AP4S1  | 1390 | 1435 | 5.7328703435  |
| NM_001128126 | AP4S1  | 1827 | 1897 | 5.73287034373 |
| NM_000344    | SMN1   | 847  | 902  | 7.31847532897 |
| NM_000346    | S0X9   | 1672 | 1736 | 3.97680213422 |
| NM_000346    | S0X9   | 3105 | 3170 | 5.56176463494 |
| NM_000346    | S0X9   | 2339 | 2390 | 5.56176463472 |
| NM_000346    | S0X9   | 606  | 647  | 5.56176462739 |
| NM_000346    | S0X9   | 2172 | 2302 | 6.56176463494 |
| NM_000346    | S0X9   | 2435 | 2476 | 5.56176439902 |
| NM_000346    | S0X9   | 3757 | 3840 | 4.97680213421 |
| NM_000346    | S0X9   | 2052 | 2094 | 4.97680212667 |
| NM_000346    | S0X9   | 159  | 233  | 3.97680213422 |
| NM_000346    | S0X9   | 1173 | 1218 | 3.97278453405 |
| NM_000346    | S0X9   | 2936 | 2993 | 4.97679540317 |
| NM_000346    | S0X9   | 444  | 495  | 3.89266292484 |
| NM_000346    | S0X9   | 1900 | 2006 | 4.97680213422 |
| NM_001164232 | DDHD2  | 642  | 675  | 5.31161168261 |
| NM_001164232 | DDHD2  | 2349 | 2413 | 6.89657418333 |
| NM_000340    | SLC2A2 | 870  | 982  | 9.22541103799 |
| NM_000340    | SLC2A2 | 1856 | 1911 | 7.64044853727 |
| NM_000340    | SLC2A2 | 541  | 583  | 7.05146843637 |

|           |        |      |      |               |
|-----------|--------|------|------|---------------|
| NM_000340 | SLC2A2 | 584  | 629  | 7.05146843637 |
| NM_000340 | SLC2A2 | 1086 | 1128 | 6.97134682716 |
| NM_000340 | SLC2A2 | 995  | 1051 | 7.64044853726 |
| NM_000340 | SLC2A2 | 1628 | 1755 | 9.75592575469 |
| NM_000340 | SLC2A2 | 420  | 466  | 6.97134682716 |
| NM_000340 | SLC2A2 | 1781 | 1842 | 7.05548580063 |
| NM_000340 | SLC2A2 | 1426 | 1558 | 9.05548603654 |
| NM_000340 | SLC2A2 | 691  | 826  | 8.37741413143 |
| NM_133502 | ZNF274 | 1500 | 1557 | 8.06817406358 |
| NM_133502 | ZNF274 | 2082 | 2159 | 8.65698041416 |
| NM_000434 | NEU1   | 113  | 441  | 11.3927099958 |
| NM_000434 | NEU1   | 657  | 902  | 10.8691480398 |
| NM_000434 | NEU1   | 924  | 1265 | 11.4237368914 |
| NM_000434 | NEU1   | 1265 | 2048 | 12.3610011361 |
| NM_000434 | NEU1   | 455  | 633  | 10.5695877579 |
| NM_006827 | TMED10 | 2000 | 2042 | 5.00845803301 |
| NM_006827 | TMED10 | 3537 | 3607 | 6.82956283656 |
| NM_006827 | TMED10 | 2661 | 2708 | 4.50746099135 |
| NM_006827 | TMED10 | 893  | 970  | 7.20807445981 |
| NM_006827 | TMED10 | 3869 | 3930 | 5.09259051134 |
| NM_006827 | TMED10 | 1342 | 1402 | 6.50763474167 |
| NM_006827 | TMED10 | 2236 | 2281 | 4.50763474145 |
| NM_006827 | TMED10 | 2290 | 2339 | 4.50746099135 |
| NM_006827 | TMED10 | 1750 | 1802 | 5.09259700647 |
| NM_006827 | TMED10 | 1642 | 1706 | 3.5036171415  |
| NM_006827 | TMED10 | 2343 | 2437 | 5.09259724239 |
| NM_006827 | TMED10 | 65   | 277  | 8.03119669773 |
| NM_006827 | TMED10 | 813  | 885  | 5.50763474167 |
| NM_006827 | TMED10 | 1515 | 1596 | 6.31498966373 |
| NM_006827 | TMED10 | 2877 | 3169 | 7.31498966373 |
| NM_006827 | TMED10 | 1252 | 1330 | 5.82956283656 |
| NM_006827 | TMED10 | 3608 | 3820 | 6.50763474167 |
| NM_006827 | TMED10 | 1868 | 1931 | 3.5036171415  |
| NM_006827 | TMED10 | 3940 | 4022 | 5.82956283656 |
| NM_006827 | TMED10 | 1009 | 1244 | 8.55202886103 |
| NM_006827 | TMED10 | 284  | 797  | 9.48491466517 |
| NM_006827 | TMED10 | 2725 | 2874 | 5.09259724239 |
| NM_006826 | YWHAQ  | 1565 | 1640 | 3.266373377   |
| NM_006826 | YWHAQ  | 192  | 226  | 2.68141087627 |
| NM_006826 | YWHAQ  | 1843 | 1903 | 2.68141087628 |
| NM_006826 | YWHAQ  | 855  | 943  | 4.00333897117 |
| NM_006826 | YWHAQ  | 2097 | 2148 | 3.68140414522 |
| NM_006826 | YWHAQ  | 307  | 521  | 5.00333897117 |
| NM_006826 | YWHAQ  | 680  | 845  | 5.266373377   |
| NM_006826 | YWHAQ  | 529  | 640  | 4.00333897117 |
| NM_006826 | YWHAQ  | 1034 | 1282 | 5.76887371753 |
| NM_006826 | YWHAQ  | 1384 | 1464 | 3.266373377   |
| NM_006825 | CKAP4  | 2938 | 3000 | 5.33112994412 |
| NM_006825 | CKAP4  | 2202 | 2268 | 5.65305803901 |
| NM_006825 | CKAP4  | 2671 | 2725 | 5.65305803901 |

|           |        |      |      |               |
|-----------|--------|------|------|---------------|
| NM_006825 | CKAP4  | 1950 | 2052 | 6.50105494557 |
| NM_006825 | CKAP4  | 499  | 652  | 6.33112994412 |
| NM_006825 | CKAP4  | 1490 | 1593 | 5.33112994412 |
| NM_006825 | CKAP4  | 2297 | 2459 | 7.9749861339  |
| NM_006825 | CKAP4  | 1593 | 1943 | 8.82298304045 |
| NM_006825 | CKAP4  | 1217 | 1413 | 7.13848486618 |
| NM_006825 | CKAP4  | 2464 | 2564 | 5.91609244485 |
| NM_006825 | CKAP4  | 2570 | 2659 | 5.91609244485 |
| NM_006825 | CKAP4  | 2055 | 2202 | 7.50105494557 |
| NM_006825 | CKAP4  | 346  | 473  | 6.33112994412 |
| NM_006825 | CKAP4  | 2750 | 2918 | 7.7234473669  |
| NM_006825 | CKAP4  | 656  | 1086 | 8.41859278537 |
| NM_006936 | SUM03  | 1260 | 1331 | 4.56759147122 |
| NM_006936 | SUM03  | 1337 | 1411 | 5.15255420786 |
| NM_006936 | SUM03  | 595  | 642  | 4.48345249775 |
| NM_006936 | SUM03  | 1587 | 1674 | 5.56759170714 |
| NM_006936 | SUM03  | 1678 | 1778 | 5.15255420786 |
| NM_006936 | SUM03  | 354  | 414  | 3.56357410697 |
| NM_006936 | SUM03  | 481  | 577  | 6.15255420786 |
| NM_006936 | SUM03  | 1179 | 1251 | 4.48345249775 |
| NM_006936 | SUM03  | 650  | 833  | 5.88951980203 |
| NM_006936 | SUM03  | 1432 | 1523 | 6.73751670858 |
| NM_006821 | AC0T2  | 1337 | 1390 | 5.35148881867 |
| NM_006821 | AC0T2  | 1040 | 1103 | 6.35148881867 |
| NM_006821 | AC0T2  | 251  | 318  | 6.35550641862 |
| NM_006821 | AC0T2  | 1624 | 1688 | 6.35550618293 |
| NM_006821 | AC0T2  | 1201 | 1299 | 7.94046891957 |
| NM_006821 | AC0T2  | 789  | 1015 | 8.94046891957 |
| NM_006777 | ZBTB33 | 1420 | 1495 | 7.43143879738 |
| NM_006777 | ZBTB33 | 4353 | 4429 | 7.43545639001 |
| NM_006777 | ZBTB33 | 293  | 343  | 9.02041866236 |
| NM_006777 | ZBTB33 | 4006 | 4052 | 7.35131718817 |
| NM_006777 | ZBTB33 | 1574 | 1643 | 7.43143879738 |
| NM_006777 | ZBTB33 | 3933 | 3987 | 7.43528264724 |
| NM_006777 | ZBTB33 | 746  | 838  | 9.43545639733 |
| NM_198971 | HINFP  | 328  | 386  | 7.8187944622  |
| NM_006775 | QKI    | 665  | 713  | 2.29385054975 |
| NM_006775 | QKI    | 3987 | 4055 | 3.87881305025 |
| NM_006775 | QKI    | 731  | 837  | 3.29385054975 |
| NM_006775 | QKI    | 1283 | 1368 | 3.29385054975 |
| NM_006775 | QKI    | 4175 | 4214 | 2.29385031383 |
| NM_006775 | QKI    | 603  | 646  | 2.20971134036 |
| NM_006775 | QKI    | 2001 | 2081 | 3.2938505422  |
| NM_006775 | QKI    | 1573 | 1638 | 4.29385054974 |
| NM_006775 | QKI    | 4060 | 4109 | 3.29384381869 |
| NM_006775 | QKI    | 2426 | 2489 | 2.29384381869 |
| NM_006775 | QKI    | 3771 | 3846 | 2.29385054974 |
| NM_006773 | DDX18  | 1383 | 1473 | 5.98120304463 |
| NM_006773 | DDX18  | 1286 | 1346 | 5.98120304463 |
| NM_006773 | DDX18  | 792  | 835  | 5.24423071941 |

|              |        |       |       |               |
|--------------|--------|-------|-------|---------------|
| NM_006773    | DDX18  | 894   | 955   | 5.65927494974 |
| NM_006773    | DDX18  | 1621  | 1658  | 4.65927471382 |
| NM_006773    | DDX18  | 3170  | 3220  | 4.65525734957 |
| NM_006773    | DDX18  | 965   | 1017  | 3.65525734957 |
| NM_006773    | DDX18  | 1063  | 1250  | 7.24423745046 |
| NM_006773    | DDX18  | 2156  | 2279  | 6.24423745046 |
| NM_006773    | DDX18  | 644   | 717   | 5.24423744291 |
| NM_006773    | DDX18  | 1846  | 1974  | 5.98120304463 |
| NM_006773    | DDX18  | 1538  | 1614  | 4.65927494974 |
| NM_006773    | DDX18  | 482   | 539   | 3.65525734957 |
| NM_015466    | PTPN23 | 253   | 313   | 7.52921918734 |
| NM_015466    | PTPN23 | 798   | 834   | 6.44508021388 |
| NM_015466    | PTPN23 | 1922  | 1988  | 7.52520182309 |
| NM_015466    | PTPN23 | 166   | 253   | 9.11418192398 |
| NM_001168236 | ABL2   | 11550 | 11621 | 8.61944380522 |
| NM_001168236 | ABL2   | 6001  | 6041  | 8.61944380522 |
| NM_001168236 | ABL2   | 1492  | 1571  | 10.6194438052 |
| NM_001168236 | ABL2   | 4801  | 4883  | 10.2045800487 |
| NM_003211    | TDG    | 275   | 320   | 6.30596953603 |
| NM_003211    | TDG    | 814   | 883   | 7.97105364596 |
| NM_003211    | TDG    | 1539  | 1626  | 6.39010874541 |
| NM_003211    | TDG    | 609   | 696   | 7.38609114524 |
| NM_181741    | ORC4   | 4646  | 4744  | 8.68336372075 |
| NM_181741    | ORC4   | 6003  | 6077  | 6.09840122003 |
| NM_181741    | ORC4   | 5231  | 5291  | 8.42032931492 |
| NM_181741    | ORC4   | 4605  | 4629  | 6.01426201064 |
| NM_181741    | ORC4   | 5315  | 5379  | 7.68336372075 |
| NM_181741    | ORC4   | 5489  | 5532  | 7.68336372075 |
| NM_181741    | ORC4   | 5549  | 5697  | 8.90575614209 |
| NM_181741    | ORC4   | 4848  | 5057  | 11.09840122   |
| NM_181741    | ORC4   | 5082  | 5170  | 8.09840122003 |
| NM_181741    | ORC4   | 5430  | 5489  | 6.09822746971 |
| NM_181741    | ORC4   | 5720  | 5869  | 7.68336372075 |
| NM_020122    | KCMF1  | 1550  | 1628  | 6.20335566241 |
| NM_020122    | KCMF1  | 947   | 982   | 3.31186153097 |
| NM_020122    | KCMF1  | 509   | 567   | 5.71792883524 |
| NM_020122    | KCMF1  | 1723  | 1756  | 3.31186153097 |
| NM_020122    | KCMF1  | 394   | 447   | 4.89682403169 |
| NM_020122    | KCMF1  | 578   | 653   | 5.39600074036 |
| NM_020122    | KCMF1  | 763   | 888   | 5.39600074036 |
| NM_020122    | KCMF1  | 667   | 729   | 4.39600050444 |
| NM_020123    | TM9SF3 | 3081  | 3164  | 6.73703561861 |
| NM_020123    | TM9SF3 | 2570  | 2640  | 7.32199811933 |
| NM_020123    | TM9SF3 | 3227  | 3291  | 6.0589637135  |
| NM_020123    | TM9SF3 | 5259  | 5309  | 4.73686186829 |
| NM_020123    | TM9SF3 | 5450  | 5551  | 5.32199811933 |
| NM_020123    | TM9SF3 | 3518  | 3559  | 3.73702888755 |
| NM_020123    | TM9SF3 | 3165  | 3219  | 3.73703561839 |
| NM_020123    | TM9SF3 | 5882  | 5960  | 3.73703538269 |
| NM_020123    | TM9SF3 | 2662  | 2833  | 7.19646723725 |

|           |        |      |      |               |
|-----------|--------|------|------|---------------|
| NM_020123 | TM9SF3 | 2912 | 3066 | 7.32199811933 |
| NM_020123 | TM9SF3 | 2322 | 2398 | 6.32199811933 |
| NM_020123 | TM9SF3 | 4280 | 4345 | 3.73703561106 |
| NM_020123 | TM9SF3 | 3391 | 3511 | 6.32199811933 |
| NM_020123 | TM9SF3 | 4570 | 4672 | 5.32199811933 |
| NM_020123 | TM9SF3 | 789  | 1347 | 10.6795501239 |
| NM_020123 | TM9SF3 | 1352 | 2218 | 11.531451485  |
| NM_020123 | TM9SF3 | 2224 | 2306 | 5.32199811933 |
| NM_020123 | TM9SF3 | 3868 | 3947 | 5.32199138828 |
| NM_020123 | TM9SF3 | 4351 | 4446 | 4.73702888755 |
| NM_020123 | TM9SF3 | 262  | 571  | 8.98496313205 |
| NM_020123 | TM9SF3 | 586  | 772  | 8.691231929   |
| NM_020123 | TM9SF3 | 85   | 157  | 4.73702888755 |
| NM_020123 | TM9SF3 | 2433 | 2543 | 7.43747533675 |
| NM_020123 | TM9SF3 | 5573 | 5739 | 4.73703561861 |
| NM_020120 | UGGT1  | 7167 | 7274 | 5.66561002257 |
| NM_020120 | UGGT1  | 7511 | 7546 | 3.99650831247 |
| NM_020120 | UGGT1  | 4838 | 4876 | 5.08064752163 |
| NM_020120 | UGGT1  | 427  | 461  | 6.0806407908  |
| NM_020120 | UGGT1  | 1063 | 1109 | 4.08047377153 |
| NM_020120 | UGGT1  | 2425 | 2522 | 7.08064752185 |
| NM_020120 | UGGT1  | 248  | 314  | 6.66561002257 |
| NM_020120 | UGGT1  | 1762 | 1867 | 6.88800244391 |
| NM_020120 | UGGT1  | 3994 | 4072 | 5.08064752185 |
| NM_020120 | UGGT1  | 9570 | 9617 | 4.0806475143  |
| NM_020120 | UGGT1  | 3109 | 3177 | 6.40257561674 |
| NM_020120 | UGGT1  | 3561 | 3634 | 6.40257561674 |
| NM_020120 | UGGT1  | 2975 | 3050 | 4.08064752184 |
| NM_020120 | UGGT1  | 3947 | 3982 | 5.08047377153 |
| NM_020120 | UGGT1  | 2847 | 2914 | 5.08064752185 |
| NM_020120 | UGGT1  | 1568 | 1609 | 4.07662992168 |
| NM_020120 | UGGT1  | 521  | 575  | 5.66561001502 |
| NM_020120 | UGGT1  | 3661 | 3704 | 4.08064752163 |
| NM_020120 | UGGT1  | 591  | 815  | 8.54007914049 |
| NM_020120 | UGGT1  | 1140 | 1245 | 7.08064752185 |
| NM_020120 | UGGT1  | 1639 | 1742 | 7.08064752185 |
| NM_020120 | UGGT1  | 864  | 976  | 7.08064752185 |
| NM_020120 | UGGT1  | 1255 | 1352 | 6.88800244391 |
| NM_020120 | UGGT1  | 4887 | 5076 | 7.66561002257 |
| NM_020120 | UGGT1  | 4693 | 4823 | 5.08064752185 |
| NM_020120 | UGGT1  | 2765 | 2847 | 6.08064752184 |
| NM_020120 | UGGT1  | 4168 | 4321 | 6.88800244391 |
| NM_020120 | UGGT1  | 3181 | 3321 | 7.40257561674 |
| NM_020120 | UGGT1  | 2536 | 2666 | 7.08064752185 |
| NM_020120 | UGGT1  | 7644 | 7711 | 5.08064752184 |
| NM_020120 | UGGT1  | 1870 | 2089 | 8.25057252329 |
| NM_020120 | UGGT1  | 5834 | 5982 | 6.40257561674 |
| NM_020120 | UGGT1  | 3788 | 3940 | 7.25057252329 |
| NM_020120 | UGGT1  | 3352 | 3524 | 7.66561002257 |
| NM_020120 | UGGT1  | 1388 | 1551 | 6.40257561674 |

|           |         |      |      |               |
|-----------|---------|------|------|---------------|
| NM_020120 | UGGT1   | 2091 | 2415 | 8.60420947791 |
| NM_020120 | UGGT1   | 4337 | 4486 | 6.66561002257 |
| NM_020121 | UGGT2   | 2572 | 2645 | 5.26952489892 |
| NM_020121 | UGGT2   | 2076 | 2149 | 6.27354249909 |
| NM_020121 | UGGT2   | 423  | 494  | 6.27354249909 |
| NM_020121 | UGGT2   | 589  | 684  | 7.85850499982 |
| NM_020121 | UGGT2   | 2367 | 2437 | 6.85849826876 |
| NM_020121 | UGGT2   | 1154 | 1216 | 6.27354249909 |
| NM_020121 | UGGT2   | 1328 | 1422 | 6.27354226318 |
| NM_020121 | UGGT2   | 294  | 345  | 6.26952489892 |
| NM_020121 | UGGT2   | 4063 | 4103 | 5.27336874878 |
| NM_020121 | UGGT2   | 2271 | 2367 | 6.27354249887 |
| NM_020121 | UGGT2   | 1996 | 2034 | 6.27354226318 |
| NM_020121 | UGGT2   | 4462 | 4558 | 7.59547059398 |
| NM_020121 | UGGT2   | 368  | 409  | 5.18940328971 |
| NM_020121 | UGGT2   | 1064 | 1129 | 6.85850499959 |
| NM_020121 | UGGT2   | 724  | 864  | 7.59547059398 |
| NM_020121 | UGGT2   | 4151 | 4246 | 7.59547059398 |
| NM_020121 | UGGT2   | 3242 | 3311 | 5.27354249909 |
| NM_020121 | UGGT2   | 2152 | 2227 | 6.18940328971 |
| NM_020121 | UGGT2   | 1618 | 1732 | 7.59547059398 |
| NM_020121 | UGGT2   | 4272 | 4375 | 5.27354249909 |
| NM_020121 | UGGT2   | 898  | 1064 | 8.59547059398 |
| NM_004551 | NDUFS3  | 323  | 362  | 6.69358164652 |
| NM_004551 | NDUFS3  | 205  | 261  | 5.9566093213  |
| NM_004551 | NDUFS3  | 427  | 708  | 8.69358164652 |
| NM_004550 | NDUFS2  | 1807 | 1848 | 5.1631304657  |
| NM_004550 | NDUFS2  | 1547 | 1641 | 4.42616487153 |
| NM_004550 | NDUFS2  | 500  | 535  | 4.42599112121 |
| NM_004550 | NDUFS2  | 1706 | 1804 | 6.01112737225 |
| NM_004550 | NDUFS2  | 1377 | 1510 | 6.42616487153 |
| NM_004550 | NDUFS2  | 1849 | 1985 | 6.01112737225 |
| NM_004550 | NDUFS2  | 620  | 1122 | 8.51362771278 |
| NM_004550 | NDUFS2  | 1133 | 1377 | 7.48505856058 |
| NM_004553 | NDUFS6  | 166  | 237  | 5.16368081085 |
| NM_004553 | NDUFS6  | 448  | 515  | 5.1636808033  |
| NM_004553 | NDUFS6  | 265  | 413  | 6.16368081085 |
| NM_003645 | SLC27A2 | 1905 | 1976 | 7.88642388873 |
| NM_003645 | SLC27A2 | 1396 | 1519 | 9.38892422926 |
| NM_003645 | SLC27A2 | 1523 | 1588 | 5.301461388   |
| NM_003645 | SLC27A2 | 267  | 353  | 6.88642388873 |
| NM_003645 | SLC27A2 | 1703 | 1762 | 7.6233894829  |
| NM_003645 | SLC27A2 | 394  | 420  | 5.21732217862 |
| NM_003645 | SLC27A2 | 439  | 494  | 6.88642388873 |
| NM_003645 | SLC27A2 | 946  | 1109 | 9.82502334407 |
| NM_003645 | SLC27A2 | 634  | 669  | 6.29744378784 |
| NM_003645 | SLC27A2 | 693  | 888  | 9.69377881079 |
| NM_003645 | SLC27A2 | 889  | 945  | 5.30128763769 |
| NM_003645 | SLC27A2 | 1613 | 1701 | 7.6233894829  |
| NM_003645 | SLC27A2 | 1116 | 1394 | 10.2556576984 |

|              |         |      |      |                |
|--------------|---------|------|------|----------------|
| NM_003645    | SLC27A2 | 1766 | 1883 | 7.30146138801  |
| NM_003645    | SLC27A2 | 1989 | 2218 | 9.69377881079  |
| NM_020699    | GATAD2B | 4650 | 4696 | 8.74932007877  |
| NM_020699    | GATAD2B | 3220 | 3299 | 10.0710811544  |
| NM_020699    | GATAD2B | 3393 | 3516 | 7.7493265739   |
| NM_020699    | GATAD2B | 2750 | 2814 | 8.74932007877  |
| NM_020699    | GATAD2B | 1899 | 2003 | 9.33411556022  |
| NM_020699    | GATAD2B | 4890 | 5001 | 7.74932680982  |
| NM_020699    | GATAD2B | 4797 | 4879 | 8.74530920965  |
| NM_020699    | GATAD2B | 2213 | 2301 | 10.0712549047  |
| NM_020699    | GATAD2B | 3108 | 3160 | 8.7491530595   |
| NM_020699    | GATAD2B | 1146 | 1251 | 10.3342893105  |
| NM_020699    | GATAD2B | 458  | 585  | 9.33428931054  |
| NM_004559    | YBX1    | 295  | 544  | 4.46961153013  |
| NM_004559    | YBX1    | 762  | 917  | 2.01017991149  |
| NM_004559    | YBX1    | 614  | 732  | 1.01017991149  |
| NM_004559    | YBX1    | 925  | 1068 | 2.59514241221  |
| NM_004559    | YBX1    | 1069 | 1299 | 4.9170705071   |
| NM_004559    | YBX1    | 1408 | 1524 | 3.59514241221  |
| NM_017925    | DENND4C | 74   | 114  | 7.92562170522  |
| NM_017925    | DENND4C | 765  | 846  | 7.42462466357  |
| NM_198467    | RSBN1L  | 101  | 167  | 7.57831816467  |
| NM_198467    | RSBN1L  | 311  | 376  | 7.57831816467  |
| NM_198467    | RSBN1L  | 2372 | 2432 | 8.57832488817  |
| NM_198467    | RSBN1L  | 2298 | 2344 | 7.57430729555  |
| NM_198467    | RSBN1L  | 1272 | 1313 | 6.49418568634  |
| NM_198467    | RSBN1L  | 1701 | 1786 | 6.5783248955   |
| NM_001164095 | COPS7A  | 1286 | 1426 | 7.91787652947  |
| NM_003136    | SRP54   | 838  | 901  | 2.36868904908  |
| NM_003136    | SRP54   | 1770 | 1806 | 2.28455657075  |
| NM_003136    | SRP54   | 2059 | 2124 | 3.69062387502  |
| NM_003136    | SRP54   | 1222 | 1313 | 3.69062387502  |
| NM_003136    | SRP54   | 211  | 283  | 2.36869554421  |
| NM_003136    | SRP54   | 1155 | 1207 | 3.69062387502  |
| NM_003136    | SRP54   | 1808 | 1862 | 2.36467817996  |
| NM_003136    | SRP54   | 1411 | 1729 | 3.95365828085  |
| NM_003136    | SRP54   | 717  | 798  | 2.36869577258  |
| NM_003136    | SRP54   | 573  | 701  | 3.95365828085  |
| NM_003136    | SRP54   | 1051 | 1135 | 2.9536582733   |
| NM_198468    | MMS22L  | 1197 | 1251 | 10.9619311729  |
| NM_198468    | MMS22L  | 2929 | 2987 | 10.9657750227  |
| NM_198468    | MMS22L  | 764  | 835  | 12.5468936736  |
| NM_003641    | IFITM1  | 263  | 317  | 9.48909784005  |
| NM_003641    | IFITM1  | 334  | 473  | 10.6045750575  |
| NM_181713    | UBXN2A  | 626  | 672  | 6.21255150077  |
| NM_003134    | SRP14   | 325  | 380  | -0.80183620933 |
| NM_003134    | SRP14   | 581  | 768  | 2.90262110898  |
| NM_003134    | SRP14   | 66   | 319  | 2.52410948573  |
| NM_000922    | PDE3B   | 964  | 1049 | 5.03648253778  |
| NM_000922    | PDE3B   | 2953 | 3001 | 6.12062173961  |

|              |          |      |      |               |               |
|--------------|----------|------|------|---------------|---------------|
| NM_000922    | PDE3B    | 1926 | 1993 | 7.44254984205 |               |
| NM_000922    | PDE3B    | 2047 | 2091 | 6.70156664771 |               |
| NM_000922    | PDE3B    | 5154 | 5205 | 5.12061501611 |               |
| NM_000922    | PDE3B    | 1374 | 1410 | 5.11660414699 |               |
| NM_000922    | PDE3B    | 1655 | 1758 | 6.70557751683 |               |
| NM_000922    | PDE3B    | 164  | 193  | 5.03648253778 |               |
| NM_000922    | PDE3B    | 1790 | 1867 | 7.12062174716 |               |
| NM_000922    | PDE3B    | 2106 | 2162 | 6.6214450385  |               |
| NM_000922    | PDE3B    | 833  | 875  | 5.12061501611 |               |
| NM_000922    | PDE3B    | 1116 | 1227 | 6.12062174694 |               |
| NM_000922    | PDE3B    | 4747 | 4842 | 7.12062174716 |               |
| NM_000922    | PDE3B    | 2647 | 2698 | 7.12062174716 |               |
| NM_001127399 | YPEL5    | 316  | 372  | 5.23714160033 |               |
| NM_020342    | SLC39A10 |      | 3887 | 3941          | 5.45764825882 |
| NM_020342    | SLC39A10 |      | 226  | 276           | 6.45764153532 |
| NM_020342    | SLC39A10 |      | 2566 | 2653          | 9.36453886198 |
| NM_020342    | SLC39A10 |      | 5090 | 5140          | 5.37350905699 |
| NM_020342    | SLC39A10 |      | 4145 | 4214          | 5.45764153532 |
| NM_020342    | SLC39A10 |      | 2261 | 2313          | 8.26500318843 |
| NM_020342    | SLC39A10 |      | 4827 | 4881          | 7.45764826637 |
| NM_020342    | SLC39A10 |      | 2860 | 2904          | 6.45764826637 |
| NM_020342    | SLC39A10 |      | 2208 | 2255          | 6.45764803045 |
| NM_020342    | SLC39A10 |      | 4902 | 4960          | 7.45764803045 |
| NM_020342    | SLC39A10 |      | 3462 | 3510          | 7.04261075954 |
| NM_020342    | SLC39A10 |      | 2673 | 2771          | 7.45764826637 |
| NM_020342    | SLC39A10 |      | 331  | 394           | 7.45764825882 |
| NM_020342    | SLC39A10 |      | 4391 | 4448          | 5.45764803045 |
| NM_020342    | SLC39A10 |      | 4748 | 4823          | 7.04261075954 |
| NM_020342    | SLC39A10 |      | 616  | 684           | 6.45764803045 |
| NM_020342    | SLC39A10 |      | 1483 | 1574          | 7.77957636126 |
| NM_020342    | SLC39A10 |      | 3279 | 3330          | 6.45747451605 |
| NM_020342    | SLC39A10 |      | 1365 | 1461          | 9.04261076709 |
| NM_020342    | SLC39A10 |      | 3105 | 3210          | 7.04261076709 |
| NM_020342    | SLC39A10 |      | 2787 | 2852          | 7.04261076709 |
| NM_020342    | SLC39A10 |      | 1582 | 1724          | 9.54511110762 |
| NM_020342    | SLC39A10 |      | 2429 | 2566          | 9.04261076709 |
| NM_020342    | SLC39A10 |      | 2107 | 2201          | 8.77957636126 |
| NM_020342    | SLC39A10 |      | 399  | 494           | 6.45764826637 |
| NM_020342    | SLC39A10 |      | 1107 | 1363          | 9.45764826637 |
| NM_020342    | SLC39A10 |      | 764  | 1086          | 9.77957636126 |
| NM_020342    | SLC39A10 |      | 1747 | 1930          | 9.54511110762 |
| NM_020342    | SLC39A10 |      | 4293 | 4375          | 6.45764826637 |
| NM_020342    | SLC39A10 |      | 2320 | 2389          | 6.45764826637 |
| NM_020342    | SLC39A10 |      | 2914 | 3065          | 7.04261076709 |
| NM_181715    | CRTC2    | 2066 | 2151 | 11.0081861605 |               |
| NM_181715    | CRTC2    | 2454 | 2522 | 10.0041685604 |               |
| NM_181715    | CRTC2    | 885  | 1004 | 9.42322365227 |               |
| NM_181715    | CRTC2    | 635  | 697  | 9.4232234239  |               |
| NM_181715    | CRTC2    | 755  | 834  | 8.42322365227 |               |
| NM_181715    | CRTC2    | 2287 | 2379 | 8.42322365982 |               |



|              |              |       |               |               |
|--------------|--------------|-------|---------------|---------------|
| NM_020340    | KIAA1244     | 12818 | 12872         | 8.15083403213 |
| NM_020340    | KIAA1244     | 2444  | 2498          | 8.23095564135 |
| NM_020340    | KIAA1244     | 4491  | 4535          | 9.81992901119 |
| NM_020340    | KIAA1244     | 3959  | 3997          | 9.81591814207 |
| NM_020340    | KIAA1244     | 3809  | 3899          | 9.23497324152 |
| NM_020340    | KIAA1244     | 6675  | 6729          | 10.2349665105 |
| NM_020340    | KIAA1244     | 4585  | 4634          | 9.23496651046 |
| NM_020340    | KIAA1244     | 2220  | 2289          | 8.23095564135 |
| NM_020340    | KIAA1244     | 11775 | 11835         | 8.15083403213 |
| NM_020340    | KIAA1244     | 4940  | 5005          | 10.5569013362 |
| NM_172341    | PSENE1 457   | 571   | 11.1308751393 |               |
| NM_172341    | PSENE1 184   | 422   | 12.1308751393 |               |
| NM_172341    | PSENE1 102   | 181   | 10.5459126386 |               |
| NM_172341    | PSENE1 604   | 723   | 11.1308751393 |               |
| NM_020348    | CNNM1 684    | 730   | 10.5797034082 |               |
| NM_020348    | CNNM1 3388   | 3494  | 13.7498021599 |               |
| NM_020348    | CNNM1 3633   | 3723  | 11.5797034082 |               |
| NM_020348    | CNNM1 4691   | 4734  | 12.160822059  |               |
| NM_020348    | CNNM1 2055   | 2118  | 12.1646659089 |               |
| NM_020348    | CNNM1 4900   | 4995  | 11.5798771509 |               |
| NM_020348    | CNNM1 1110   | 1165  | 11.5758595583 |               |
| NM_020348    | CNNM1 1807   | 1890  | 12.5798771583 |               |
| NM_020348    | CNNM1 4199   | 4253  | 11.5758595583 |               |
| NM_020348    | CNNM1 982    | 1063  | 12.9018052534 |               |
| NM_020348    | CNNM1 1614   | 1663  | 10.5798771509 |               |
| NM_020348    | CNNM1 3295   | 3369  | 10.5798771585 |               |
| NM_020348    | CNNM1 3496   | 3549  | 10.5798704274 |               |
| NM_020348    | CNNM1 1705   | 1803  | 12.9018052534 |               |
| NM_020348    | CNNM1 316    | 403   | 12.5798771583 |               |
| NM_020348    | CNNM1 1930   | 2044  | 12.9018052534 |               |
| NM_020348    | CNNM1 5510   | 5587  | 11.5797034082 |               |
| NM_020348    | CNNM1 2398   | 2518  | 13.9018052534 |               |
| NM_020348    | CNNM1 2985   | 3059  | 12.1648329281 |               |
| NM_020348    | CNNM1 2131   | 2338  | 13.3872320805 |               |
| NM_007280    | OIP5 959     | 1049  | 9.30656987937 |               |
| NM_007280    | OIP5 440     | 519   | 7.72160737887 |               |
| NM_007285    | GABARAPL2    | 557   | 615           | 3.94924290706 |
| NM_007285    | GABARAPL2    | 145   | 326           | 8.03687949863 |
| NM_001033855 | DCLRE1C 5114 | 5144  | 7.49828404664 |               |
| NM_052903    | TUBGCP5 448  | 506   | 7.63658008387 |               |
| NM_052903    | TUBGCP5 2834 | 2873  | 6.63658008387 |               |
| NM_052903    | TUBGCP5 2136 | 2208  | 8.30567506292 |               |
| NM_052902    | STK11IP 1021 | 1091  | 9.41887376254 |               |
| NM_052902    | STK11IP 653  | 726   | 9.50301273601 |               |
| NM_052902    | STK11IP 2430 | 2464  | 8.50283922161 |               |
| NM_145305    | SLC25A43     | 588   | 673           | 10.928067721  |
| NM_182916    | TRNT1 1699   | 1757  | 4.87000761382 |               |
| NM_182917    | EIF4G1 5297  | 5381  | 6.404669685   |               |
| NM_182917    | EIF4G1 3405  | 3482  | 3.94523806636 |               |
| NM_182917    | EIF4G1 3320  | 3400  | 6.26716616125 |               |

|           |        |      |      |               |
|-----------|--------|------|------|---------------|
| NM_182917 | EIF4G1 | 623  | 686  | 3.94523806636 |
| NM_182917 | EIF4G1 | 5169 | 5297 | 3.94523806636 |
| NM_182917 | EIF4G1 | 5445 | 5492 | 3.9452313353  |
| NM_182917 | EIF4G1 | 2717 | 2758 | 3.94122046619 |
| NM_182917 | EIF4G1 | 1546 | 1656 | 5.26716616125 |
| NM_182917 | EIF4G1 | 2294 | 2462 | 6.85212866197 |
| NM_182917 | EIF4G1 | 4113 | 4198 | 4.53020056708 |
| NM_182917 | EIF4G1 | 899  | 1028 | 5.75259298842 |
| NM_182917 | EIF4G1 | 2073 | 2290 | 6.94523806636 |
| NM_182917 | EIF4G1 | 3483 | 3587 | 6.26716616125 |
| NM_182917 | EIF4G1 | 2505 | 2680 | 5.94523806636 |
| NM_182917 | EIF4G1 | 4781 | 5162 | 8.30279007098 |
| NM_182917 | EIF4G1 | 2885 | 3305 | 8.70012556852 |
| NM_182917 | EIF4G1 | 5496 | 5625 | 6.6456777845  |
| NM_182917 | EIF4G1 | 1892 | 2058 | 6.1151630678  |
| NM_182917 | EIF4G1 | 801  | 857  | 2.94523806636 |
| NM_182917 | EIF4G1 | 308  | 500  | 6.1151630678  |
| NM_182917 | EIF4G1 | 1719 | 1876 | 5.26716616125 |
| NM_182917 | EIF4G1 | 3605 | 3977 | 7.70012556852 |
| NM_182917 | EIF4G1 | 4244 | 4778 | 8.75259298842 |
| NM_182917 | EIF4G1 | 1163 | 1545 | 8.58909425613 |
| NM_002078 | GOLGA4 | 7204 | 7266 | 2.95534055255 |
| NM_002078 | GOLGA4 | 6898 | 6944 | 3.95149670269 |
| NM_002079 | GOT1   | 1619 | 1665 | 5.49524647899 |
| NM_002079 | GOT1   | 1468 | 1515 | 6.49524647899 |
| NM_002079 | GOT1   | 1680 | 1731 | 6.08020897949 |
| NM_002079 | GOT1   | 407  | 491  | 7.30260140105 |
| NM_002079 | GOT1   | 2027 | 2081 | 6.49524624308 |
| NM_002079 | GOT1   | 129  | 224  | 6.49524647899 |
| NM_002079 | GOT1   | 335  | 399  | 6.49524647899 |
| NM_002079 | GOT1   | 1930 | 2000 | 4.49507272868 |
| NM_002079 | GOT1   | 256  | 330  | 4.49524647144 |
| NM_002079 | GOT1   | 1112 | 1305 | 8.19568619713 |
| NM_002079 | GOT1   | 524  | 761  | 8.08020897971 |
| NM_002079 | GOT1   | 763  | 1092 | 9.30260140105 |
| NM_002079 | GOT1   | 1735 | 1883 | 7.30260140105 |
| NM_002070 | GNAI2  | 1432 | 1515 | 4.89785174346 |
| NM_002070 | GNAI2  | 691  | 791  | 4.89785174368 |
| NM_002072 | GNAQ   | 672  | 736  | 7.96662791186 |
| NM_002072 | GNAQ   | 1141 | 1169 | 7.29752620198 |
| NM_002072 | GNAQ   | 957  | 1022 | 7.37764781119 |
| NM_002072 | GNAQ   | 4868 | 4919 | 7.37764781119 |
| NM_002074 | GNB1   | 3004 | 3084 | 6.92285592666 |
| NM_002074 | GNB1   | 2530 | 2591 | 5.92285592666 |
| NM_002074 | GNB1   | 2139 | 2206 | 5.50781842738 |
| NM_002074 | GNB1   | 2621 | 2717 | 6.50781842738 |
| NM_002074 | GNB1   | 3102 | 3193 | 6.24478402155 |
| NM_002074 | GNB1   | 1053 | 1092 | 5.50781819146 |
| NM_002074 | GNB1   | 276  | 513  | 7.73021084872 |
| NM_002074 | GNB1   | 2064 | 2131 | 4.92285591911 |

|              |         |      |      |               |
|--------------|---------|------|------|---------------|
| NM_002074    | GNB1    | 2858 | 2894 | 3.91883832649 |
| NM_002074    | GNB1    | 2915 | 3003 | 6.50781842738 |
| NM_002074    | GNB1    | 596  | 650  | 5.92285592666 |
| NM_002074    | GNB1    | 657  | 1047 | 9.3822875453  |
| NM_002074    | GNB1    | 1970 | 2063 | 6.50781842738 |
| NM_002074    | GNB1    | 2292 | 2512 | 7.50781842738 |
| NM_002074    | GNB1    | 1701 | 1890 | 7.6232956448  |
| NM_002074    | GNB1    | 1111 | 1700 | 9.6232956448  |
| NM_001806    | CEBPG   | 1897 | 1979 | 4.67048266518 |
| NM_001806    | CEBPG   | 3015 | 3113 | 3.67048267251 |
| NM_001040438 | C6orf48 | 200  | 285  | 6.28329442574 |
| NM_001040438 | C6orf48 | 290  | 359  | 7.28329442574 |
| NM_001040438 | C6orf48 | 375  | 645  | 9.92715061552 |
| NM_001040438 | C6orf48 | 4    | 94   | 6.86825692646 |
| NM_002077    | GOLGA1  | 3170 | 3237 | 4.85014145555 |
| NM_002077    | GOLGA1  | 938  | 982  | 4.77001984634 |
| NM_001242768 | MTHFD1L | 2189 | 2237 | 5.61318929514 |
| NM_001242768 | MTHFD1L | 2048 | 2097 | 5.61720689531 |
| NM_001242768 | MTHFD1L | 1413 | 1508 | 5.61703314499 |
| NM_001242768 | MTHFD1L | 1925 | 1975 | 4.61703314499 |
| NM_001242768 | MTHFD1L | 1764 | 1837 | 5.53306768593 |
| NM_001242768 | MTHFD1L | 2420 | 2521 | 6.61720689531 |
| NM_001242768 | MTHFD1L | 1510 | 1533 | 4.53306768593 |
| NM_001242768 | MTHFD1L | 288  | 334  | 6.20216916012 |
| NM_001242768 | MTHFD1L | 137  | 263  | 6.61720665939 |
| NM_001242768 | MTHFD1L | 486  | 529  | 5.61318929514 |
| NM_001242768 | MTHFD1L | 2990 | 3051 | 4.61720016426 |
| NM_001242768 | MTHFD1L | 1118 | 1241 | 5.61720016426 |
| NM_001242768 | MTHFD1L | 660  | 849  | 7.20216939603 |
| NM_001242768 | MTHFD1L | 2709 | 2835 | 5.61720689531 |
| NM_001242768 | MTHFD1L | 2243 | 2305 | 5.61720689531 |
| NM_001242768 | MTHFD1L | 1666 | 1735 | 6.19815179586 |
| NM_001003712 | OSBPL8  | 1366 | 1483 | 7.99506536003 |
| NM_001003712 | OSBPL8  | 2336 | 2418 | 6.99506535981 |
| NM_001003712 | OSBPL8  | 5968 | 6015 | 6.99505862898 |
| NM_001003712 | OSBPL8  | 4842 | 4902 | 6.99489160971 |
| NM_001003712 | OSBPL8  | 4380 | 4449 | 5.99104775986 |
| NM_001003712 | OSBPL8  | 2155 | 2219 | 6.99505862898 |
| NM_001003712 | OSBPL8  | 1623 | 1687 | 6.99489160971 |
| NM_001003712 | OSBPL8  | 2853 | 2919 | 6.99506535248 |
| NM_001003712 | OSBPL8  | 4124 | 4186 | 5.99506535248 |
| NM_001003712 | OSBPL8  | 997  | 1048 | 5.91092615065 |
| NM_001003712 | OSBPL8  | 882  | 975  | 7.58002786075 |
| NM_001003712 | OSBPL8  | 2098 | 2148 | 5.99489160971 |
| NM_001003712 | OSBPL8  | 3395 | 3442 | 6.99489160971 |
| NM_001003712 | OSBPL8  | 1524 | 1593 | 5.99506512411 |
| NM_145169    | SFT2D1  | 155  | 216  | 8.22021266501 |
| NM_145169    | SFT2D1  | 582  | 634  | 6.05028766357 |
| NM_145169    | SFT2D1  | 512  | 579  | 6.05028766357 |
| NM_145169    | SFT2D1  | 467  | 508  | 6.63524992837 |

|              |          |      |       |                     |
|--------------|----------|------|-------|---------------------|
| NM_145169    | SFT2D1   | 340  | 424   | 8.22021266501       |
| NM_145169    | SFT2D1   | 232  | 324   | 8.05028766357       |
| NM_145165    | CHURC1   | 175  | 232   | 5.20208594235       |
| NM_006487    | FBLN1    | 729  | 1097  | 9.37483348108       |
| NM_006487    | FBLN1    | 503  | 726   | 8.2113347488        |
| NM_006487    | FBLN1    | 163  | 351   | 7.81540607247       |
| NM_006487    | FBLN1    | 1106 | 1845  | 9.83426509972       |
| NM_006487    | FBLN1    | 359  | 494   | 6.73740356047       |
| NM_145167    | PIGM     | 1257 | 1340  | 11.997312944        |
| NM_145167    | PIGM     | 2020 | 2052  | 10.412350443        |
| NM_145167    | PIGM     | 512  | 647   | 12.4123504432       |
| NM_145167    | PIGM     | 677  | 794   | 13.8717820619       |
| NM_145167    | PIGM     | 180  | 409   | 13.8717820619       |
| NM_145167    | PIGM     | 833  | 1146  | 14.4123504432       |
| NM_145167    | PIGM     | 1466 | 1621  | 13.4123504432       |
| NM_006483    | DYRK1B   | 862  | 916   | 9.07794793868       |
| NM_001029863 | C6orf120 |      | 795   | 958 9.02855433936   |
| NM_001145635 | TRIM45   | 2791 | 2889  | 10.5737738035       |
| NM_022464    | SIL1     | 378  | 440   | 6.25532786871       |
| NM_022464    | SIL1     | 608  | 697   | 7.57742971392       |
| NM_022464    | SIL1     | 800  | 874   | 6.84046411974       |
| NM_022464    | SIL1     | 980  | 1031  | 6.75632491037       |
| NM_022464    | SIL1     | 708  | 741   | 7.25549488798       |
| NM_022464    | SIL1     | 65   | 138   | 5.25550138311       |
| NM_022464    | SIL1     | 1406 | 1479  | 6.25549488798       |
| NM_022831    | AIDA     | 1796 | 1851  | 5.84105670825       |
| NM_022831    | AIDA     | 767  | 839   | 4.25609420774       |
| NM_022831    | AIDA     | 552  | 607   | 5.84088295815       |
| NM_022831    | AIDA     | 2219 | 2263  | 4.25592045743       |
| NM_022831    | AIDA     | 1723 | 1792  | 5.84105670092       |
| NM_022831    | AIDA     | 1661 | 1700  | 4.25207660758       |
| NM_022831    | AIDA     | 903  | 940   | 6.57400470246       |
| NM_022831    | AIDA     | 1572 | 1629  | 4.25207660758       |
| NM_022831    | AIDA     | 1420 | 1487  | 5.84104997742       |
| NM_022831    | AIDA     | 2469 | 2564  | 5.84105670847       |
| NM_022831    | AIDA     | 1259 | 1357  | 6.57802230264       |
| NM_014631    | SH3PXD2A |      | 9576  | 9630 6.13847902814  |
| NM_014631    | SH3PXD2A |      | 11096 | 11170 7.22261150647 |
| NM_014631    | SH3PXD2A |      | 215   | 305 7.22261822997   |
| NM_014631    | SH3PXD2A |      | 4385  | 4432 6.21860063735  |
| NM_014631    | SH3PXD2A |      | 487   | 571 6.13847902814   |
| NM_014630    | ZNF592   | 4195 | 4266  | 9.19893473519       |
| NM_014633    | CTR9     | 325  | 371   | 6.64088549534       |
| NM_014633    | CTR9     | 3227 | 3290  | 5.64088549534       |
| NM_014633    | CTR9     | 1666 | 1770  | 5.72100710455       |
| NM_014633    | CTR9     | 750  | 889   | 7.72502470472       |
| NM_003963    | TM4SF5   | 334  | 381   | 6.6306663828        |
| NM_003963    | TM4SF5   | 44   | 187   | 8.50513550071       |
| NM_003963    | TM4SF5   | 200  | 328   | 8.6306663828        |
| NM_003963    | TM4SF5   | 386  | 461   | 5.04553013176       |

|              |         |      |      |               |
|--------------|---------|------|------|---------------|
| NM_003963    | TM4SF5  | 469  | 699  | 7.6306663828  |
| NM_014188    | SSU72   | 984  | 1028 | 5.58652287774 |
| NM_014188    | SSU72   | 879  | 929  | 6.39387803572 |
| NM_014188    | SSU72   | 934  | 978  | 5.17148561416 |
| NM_014188    | SSU72   | 502  | 675  | 7.39387803572 |
| NM_014188    | SSU72   | 414  | 496  | 6.17148561438 |
| NM_014188    | SSU72   | 772  | 862  | 5.90845120855 |
| NM_014188    | SSU72   | 1149 | 1301 | 5.58652311366 |
| NM_014639    | TTC37   | 4194 | 4245 | 4.81239645348 |
| NM_001204315 | PRLR    | 807  | 850  | 9.54876154089 |
| NM_001204315 | PRLR    | 84   | 176  | 7.96379904017 |
| NM_014184    | CNIH4   | 410  | 464  | 7.48948046703 |
| NM_014184    | CNIH4   | 465  | 557  | 9.81140856192 |
| NM_014184    | CNIH4   | 574  | 673  | 8.90451796631 |
| NM_014184    | CNIH4   | 272  | 410  | 10.0744429678 |
| NM_014184    | CNIH4   | 122  | 254  | 10.7118728884 |
| NM_014183    | DYNLRB1 | 224  | 475  | 7.28653500587 |
| NM_014183    | DYNLRB1 | 577  | 676  | 6.18699933232 |
| NM_014183    | DYNLRB1 | 475  | 574  | 6.37964441026 |
| NM_014182    | ORMDL2  | 60   | 115  | 5.47276843649 |
| NM_014182    | ORMDL2  | 276  | 400  | 8.55690764588 |
| NM_014182    | ORMDL2  | 145  | 271  | 7.87883574076 |
| NM_014181    | LGALSL  | 405  | 477  | 7.62538356926 |
| NM_014181    | LGALSL  | 592  | 655  | 8.20650222013 |
| NM_014180    | MRPL22  | 613  | 673  | 4.47585972551 |
| NM_014180    | MRPL22  | 391  | 441  | 5.47585972552 |
| NM_014180    | MRPL22  | 191  | 255  | 6.06082222623 |
| NM_014180    | MRPL22  | 268  | 361  | 6.47585972552 |
| NM_014180    | MRPL22  | 36   | 91   | 4.4758597253  |
| NM_080626    | BRI3BP  | 268  | 329  | 10.0170785367 |
| NM_080626    | BRI3BP  | 702  | 763  | 10.0170787727 |
| NM_080626    | BRI3BP  | 988  | 1129 | 9.60204127338 |
| NM_080626    | BRI3BP  | 831  | 932  | 10.3390068675 |
| NM_080626    | BRI3BP  | 358  | 484  | 12.2650062861 |
| NM_080626    | BRI3BP  | 505  | 696  | 11.9239693683 |
| NM_003703    | NOP14   | 2951 | 3002 | 5.78838817789 |
| NM_003703    | NOP14   | 1471 | 1521 | 5.78838817789 |
| NM_003703    | NOP14   | 2026 | 2070 | 5.199408077   |
| NM_003703    | NOP14   | 1666 | 1755 | 5.78838817789 |
| NM_003703    | NOP14   | 591  | 645  | 6.20342567717 |
| NM_003703    | NOP14   | 2320 | 2375 | 4.199408077   |
| NM_003703    | NOP14   | 1759 | 1882 | 6.78838817789 |
| NM_003703    | NOP14   | 2507 | 2565 | 4.199408077   |
| NM_003703    | NOP14   | 819  | 898  | 6.20342544125 |
| NM_003703    | NOP14   | 1590 | 1642 | 4.20342544125 |
| NM_003703    | NOP14   | 2410 | 2485 | 5.199408077   |
| NM_003703    | NOP14   | 2141 | 2315 | 6.78838817789 |
| NM_003703    | NOP14   | 2080 | 2140 | 5.199408077   |
| NM_003703    | NOP14   | 1937 | 2001 | 5.78838817789 |
| NM_003703    | NOP14   | 2791 | 2950 | 7.37335067861 |

|           |          |      |      |               |               |
|-----------|----------|------|------|---------------|---------------|
| NM_005393 | PLXNB3   | 5653 | 5725 | 12.2625679055 |               |
| NM_003704 | FAM193A  | 801  | 865  | 6.59500987756 |               |
| NM_003704 | FAM193A  | 1949 | 1994 | 6.59500315405 |               |
| NM_003704 | FAM193A  | 4223 | 4279 | 7.59500964919 |               |
| NM_003704 | FAM193A  | 4123 | 4215 | 7.59500315405 |               |
| NM_003704 | FAM193A  | 491  | 568  | 6.59483613479 |               |
| NM_003704 | FAM193A  | 4463 | 4603 | 8.59500988511 |               |
| NM_003707 | RUVBL1   | 281  | 353  | 6.2655270052  |               |
| NM_003707 | RUVBL1   | 422  | 476  | 5.85048950592 |               |
| NM_003707 | RUVBL1   | 1623 | 1680 | 6.26553373625 |               |
| NM_003707 | RUVBL1   | 957  | 1048 | 5.26553372871 |               |
| NM_003707 | RUVBL1   | 1054 | 1216 | 6.85049623698 |               |
| NM_015324 | RRP8     | 1633 | 1688 | 6.76165720374 |               |
| NM_015324 | RRP8     | 1176 | 1241 | 7.76550105359 |               |
| NM_015325 | KIAA0947 |      | 5563 | 5635          | 8.16731335354 |
| NM_015325 | KIAA0947 |      | 6014 | 6071          | 6.58235085282 |
| NM_015325 | KIAA0947 |      | 85   | 133           | 8.08719174433 |
| NM_015325 | KIAA0947 |      | 1319 | 1352          | 6.58619470268 |
| NM_015325 | KIAA0947 |      | 6582 | 6691          | 9.17133095372 |
| NM_015325 | KIAA0947 |      | 1541 | 1623          | 7.58636172194 |
| NM_015325 | KIAA0947 |      | 3647 | 3717          | 7.58636845277 |
| NM_015325 | KIAA0947 |      | 4827 | 4890          | 7.58235085282 |
| NM_018246 | CCDC25   | 1030 | 1088 | 3.47675903069 |               |
| NM_015327 | SMG5     | 2587 | 2646 | 4.58508323568 |               |
| NM_015327 | SMG5     | 3625 | 3699 | 6.5850832359  |               |
| NM_015327 | SMG5     | 3511 | 3560 | 6.5850832359  |               |
| NM_015327 | SMG5     | 1370 | 1458 | 5.58508323568 |               |
| NM_015327 | SMG5     | 1306 | 1365 | 6.1700455007  |               |
| NM_015327 | SMG5     | 1874 | 1936 | 5.5850832359  |               |
| NM_015327 | SMG5     | 2705 | 2755 | 4.58507650485 |               |
| NM_015327 | SMG5     | 3843 | 3895 | 6.17004573661 |               |
| NM_015327 | SMG5     | 2793 | 2843 | 5.5850832359  |               |
| NM_015327 | SMG5     | 204  | 276  | 7.17004573662 |               |
| NM_015327 | SMG5     | 3704 | 3790 | 4.58508323568 |               |
| NM_015327 | SMG5     | 2093 | 2429 | 8.90701133079 |               |
| NM_015327 | SMG5     | 1188 | 1268 | 6.5850832359  |               |
| NM_015327 | SMG5     | 1639 | 1748 | 5.5850832359  |               |
| NM_015327 | SMG5     | 1040 | 1137 | 6.17004573662 |               |
| NM_015327 | SMG5     | 3386 | 3470 | 6.5850832359  |               |
| NM_015327 | SMG5     | 4161 | 4340 | 7.5850832359  |               |
| NM_015327 | SMG5     | 4459 | 4538 | 6.17004573662 |               |
| NM_015327 | SMG5     | 285  | 410  | 7.17004573662 |               |
| NM_015327 | SMG5     | 1545 | 1629 | 7.17004573662 |               |
| NM_015327 | SMG5     | 697  | 793  | 7.17004573662 |               |
| NM_015327 | SMG5     | 3129 | 3307 | 7.39243815796 |               |
| NM_015327 | SMG5     | 3795 | 3843 | 4.58507650485 |               |
| NM_015327 | SMG5     | 3960 | 4038 | 5.58490948558 |               |
| NM_015327 | SMG5     | 1980 | 2060 | 4.58508299998 |               |
| NM_015327 | SMG5     | 2864 | 3027 | 7.17004573662 |               |
| NM_015327 | SMG5     | 871  | 981  | 6.5850832359  |               |

|              |        |      |      |               |
|--------------|--------|------|------|---------------|
| NM_015327    | SMG5   | 443  | 694  | 8.04451485454 |
| NM_015322    | FEM1B  | 2174 | 2224 | 6.44406909162 |
| NM_015322    | FEM1B  | 4766 | 4837 | 7.52419070084 |
| NM_015322    | FEM1B  | 1843 | 1917 | 6.52419070084 |
| NM_018243    | SEPT11 | 3656 | 3741 | 5.84517366866 |
| NM_018243    | SEPT11 | 438  | 495  | 6.17607195856 |
| NM_018243    | SEPT11 | 1497 | 1540 | 4.26003741762 |
| NM_018243    | SEPT11 | 1621 | 1674 | 5.26021093202 |
| NM_018243    | SEPT11 | 971  | 1018 | 4.17607195856 |
| NM_018243    | SEPT11 | 2418 | 2486 | 4.26020443689 |
| NM_018243    | SEPT11 | 2008 | 2069 | 5.26020443689 |
| NM_018243    | SEPT11 | 1024 | 1080 | 5.84516693761 |
| NM_018243    | SEPT11 | 4950 | 5001 | 5.25619356777 |
| NM_018243    | SEPT11 | 173  | 309  | 7.06756609    |
| NM_018243    | SEPT11 | 5213 | 5324 | 6.26021116794 |
| NM_018243    | SEPT11 | 4604 | 4663 | 4.26003741762 |
| NM_018243    | SEPT11 | 1748 | 1851 | 5.26021116794 |
| NM_001048199 | RCC1   | 120  | 206  | 6.69127804422 |
| NM_001048199 | RCC1   | 1294 | 1339 | 5.02217657003 |
| NM_001048199 | RCC1   | 1395 | 1461 | 6.10631577942 |
| NM_001048199 | RCC1   | 651  | 747  | 6.69127828014 |
| NM_001048199 | RCC1   | 1063 | 1142 | 6.69127828014 |
| NM_001048199 | RCC1   | 794  | 889  | 6.69127827992 |
| NM_015329    | MAU2   | 1423 | 1466 | 8.60220927997 |
| NM_015329    | MAU2   | 232  | 275  | 7.10121223831 |
| NM_015329    | MAU2   | 344  | 427  | 9.10138598863 |
| NM_015329    | MAU2   | 1617 | 1682 | 8.60220927997 |
| NM_015329    | MAU2   | 1939 | 2005 | 7.10137925758 |
| NM_015329    | MAU2   | 889  | 957  | 8.6863484818  |
| NM_015329    | MAU2   | 3474 | 3535 | 8.01724677925 |
| NM_015329    | MAU2   | 1196 | 1242 | 8.6863484818  |
| NM_015329    | MAU2   | 1371 | 1416 | 7.10138598862 |
| NM_015329    | MAU2   | 113  | 191  | 8.10137925758 |
| NM_015329    | MAU2   | 3917 | 4000 | 8.10138598108 |
| NM_015329    | MAU2   | 1472 | 1545 | 7.09736838846 |
| NM_015329    | MAU2   | 495  | 632  | 8.68634848935 |
| NM_019116    | UBFD1  | 1078 | 1120 | 4.18682395757 |
| NM_019116    | UBFD1  | 1236 | 1280 | 4.77195997269 |
| NM_019116    | UBFD1  | 2357 | 2418 | 4.77196020861 |
| NM_019116    | UBFD1  | 2430 | 2534 | 5.50892580278 |
| NM_019116    | UBFD1  | 237  | 289  | 4.18699770767 |
| NM_019116    | UBFD1  | 450  | 532  | 5.18699770789 |
| NM_019116    | UBFD1  | 2847 | 2950 | 4.77195347756 |
| NM_019116    | UBFD1  | 4790 | 4850 | 4.18298010772 |
| NM_019116    | UBFD1  | 4730 | 4786 | 5.50892579523 |
| NM_019116    | UBFD1  | 1542 | 1596 | 4.1028584985  |
| NM_019116    | UBFD1  | 1366 | 1423 | 3.18298010772 |
| NM_019116    | UBFD1  | 1155 | 1233 | 4.7719602086  |
| NM_019116    | UBFD1  | 843  | 956  | 5.77196020861 |
| NM_019116    | UBFD1  | 3836 | 3928 | 4.77196020839 |

|              |        |      |      |               |
|--------------|--------|------|------|---------------|
| NM_019116    | UBFD1  | 2646 | 2724 | 4.77195997269 |
| NM_019112    | ABCA7  | 1315 | 1379 | 7.02195431988 |
| NM_019112    | ABCA7  | 4951 | 5008 | 7.02212806265 |
| NM_001004127 | ALG11  | 87   | 201  | 8.92959296423 |
| NM_001004127 | ALG11  | 1418 | 1495 | 6.60749111903 |
| NM_001004127 | ALG11  | 738  | 838  | 8.92959296423 |
| NM_001004127 | ALG11  | 628  | 668  | 7.60749111903 |
| NM_001004127 | ALG11  | 1174 | 1259 | 8.19262737007 |
| NM_001004127 | ALG11  | 247  | 317  | 7.6076648618  |
| NM_001004127 | ALG11  | 425  | 543  | 8.92959296423 |
| NM_001004128 | QS0X1  | 1573 | 1614 | 6.4577173669  |
| NM_001004128 | QS0X1  | 580  | 651  | 7.126819077   |
| NM_001004128 | QS0X1  | 1480 | 1523 | 7.126819077   |
| NM_001004128 | QS0X1  | 762  | 844  | 7.126819077   |
| NM_001004128 | QS0X1  | 1615 | 1655 | 6.54185634036 |
| NM_001004128 | QS0X1  | 654  | 715  | 5.54185656873 |
| NM_001004128 | QS0X1  | 1285 | 1361 | 6.54185657628 |
| NM_001004128 | QS0X1  | 476  | 553  | 7.12681907678 |
| NM_001004128 | QS0X1  | 1091 | 1158 | 6.53783897611 |
| NM_001004128 | QS0X1  | 1678 | 1726 | 6.53783897611 |
| NM_001004128 | QS0X1  | 844  | 903  | 5.54184984523 |
| NM_001004128 | QS0X1  | 2312 | 2373 | 7.54185657628 |
| NM_001004128 | QS0X1  | 2151 | 2264 | 6.54185657628 |
| NM_001004128 | QS0X1  | 1400 | 1462 | 7.12681234595 |
| NM_001014999 | SLX1A  | 876  | 942  | 4.90568499786 |
| NM_001014999 | SLX1A  | 741  | 791  | 5.90952884772 |
| NM_001014999 | SLX1A  | 279  | 386  | 6.90970259803 |
| NM_001014999 | SLX1A  | 957  | 1076 | 6.90970259803 |
| NM_014455    | RNF115 | 641  | 680  | 6.25260043171 |
| NM_014455    | RNF115 | 1009 | 1055 | 6.25260043171 |
| NM_014455    | RNF115 | 262  | 326  | 7.25260043171 |
| NM_014455    | RNF115 | 423  | 539  | 8.3367396411  |
| NM_014455    | RNF115 | 879  | 936  | 6.33272204092 |
| NM_014454    | SESN1  | 1792 | 1833 | 5.57003150928 |
| NM_014456    | PDCD4  | 2092 | 2140 | 4.53315202796 |
| NM_014456    | PDCD4  | 1683 | 1723 | 3.53314529691 |
| NM_014456    | PDCD4  | 1263 | 1349 | 5.11811452868 |
| NM_014456    | PDCD4  | 1011 | 1071 | 5.11409692851 |
| NM_014456    | PDCD4  | 1982 | 2031 | 5.11811429277 |
| NM_014456    | PDCD4  | 800  | 867  | 3.52913442779 |
| NM_014456    | PDCD4  | 1072 | 1250 | 5.11811452868 |
| NM_014456    | PDCD4  | 1466 | 1529 | 3.53297827765 |
| NM_014456    | PDCD4  | 1385 | 1460 | 4.52913442779 |
| NM_014456    | PDCD4  | 481  | 547  | 3.52913442779 |
| NM_014456    | PDCD4  | 713  | 797  | 3.53315179204 |
| NM_014983    | HMGXB3 | 3332 | 3393 | 7.24289455656 |
| NM_014983    | HMGXB3 | 2706 | 2756 | 9.56884025162 |
| NM_014983    | HMGXB3 | 3874 | 3932 | 7.24690542568 |
| NM_014983    | HMGXB3 | 2780 | 2854 | 9.24691215673 |
| NM_014983    | HMGXB3 | 3414 | 3492 | 7.24289455656 |



|           |          |      |      |               |               |
|-----------|----------|------|------|---------------|---------------|
| NM_014983 | HMGXB3   | 3493 | 3531 | 7.16277294735 |               |
| NM_014983 | HMGXB3   | 671  | 760  | 8.24691215672 |               |
| NM_014982 | PCNX     | 8867 | 8911 | 6.798051441   |               |
| NM_014982 | PCNX     | 2218 | 2285 | 7.80206903362 |               |
| NM_014982 | PCNX     | 4742 | 4806 | 6.80189529085 |               |
| NM_014982 | PCNX     | 4901 | 4965 | 8.38703153434 |               |
| NM_014982 | PCNX     | 2315 | 2379 | 7.80206880525 |               |
| NM_014982 | PCNX     | 6054 | 6115 | 6.80189529085 |               |
| NM_014982 | PCNX     | 3674 | 3713 | 7.80206231012 |               |
| NM_014982 | PCNX     | 882  | 948  | 7.80189529085 |               |
| NM_014982 | PCNX     | 6417 | 6489 | 8.38703130597 |               |
| NM_014982 | PCNX     | 682  | 762  | 6.798051441   |               |
| NM_014982 | PCNX     | 5612 | 5673 | 8.80206904117 |               |
| NM_014982 | PCNX     | 5687 | 5763 | 7.80206904117 |               |
| NM_014452 | TNFRSF21 |      | 902  | 959           | 5.78971793805 |
| NM_014452 | TNFRSF21 |      | 496  | 562           | 4.78971793805 |
| NM_014452 | TNFRSF21 |      | 2008 | 2054          | 4.70557872867 |
| NM_014452 | TNFRSF21 |      | 2763 | 2825          | 5.78570033788 |
| NM_014452 | TNFRSF21 |      | 3177 | 3252          | 5.78954418773 |
| NM_014452 | TNFRSF21 |      | 648  | 693           | 4.78570033788 |
| NM_014452 | TNFRSF21 |      | 2351 | 2452          | 7.37468043877 |
| NM_014452 | TNFRSF21 |      | 1889 | 1978          | 6.78971793783 |
| NM_014452 | TNFRSF21 |      | 2596 | 2657          | 4.78570033788 |
| NM_014452 | TNFRSF21 |      | 2712 | 2759          | 6.37468020285 |
| NM_014452 | TNFRSF21 |      | 3408 | 3473          | 4.78971793783 |
| NM_014452 | TNFRSF21 |      | 2069 | 2128          | 5.78954418773 |
| NM_014452 | TNFRSF21 |      | 1466 | 1580          | 6.78971793805 |
| NM_014452 | TNFRSF21 |      | 1177 | 1257          | 5.78971793783 |
| NM_014452 | TNFRSF21 |      | 2165 | 2278          | 4.7897179305  |
| NM_014452 | TNFRSF21 |      | 3034 | 3158          | 6.37468043877 |
| NM_005706 | TSSC4    | 14   | 110  | 9.46545960721 |               |
| NM_005706 | TSSC4    | 213  | 314  | 11.050428839  |               |
| NM_005702 | ERAL1    | 1679 | 1739 | 5.09898971446 |               |
| NM_005702 | ERAL1    | 1191 | 1240 | 6.76809141702 |               |
| NM_005702 | ERAL1    | 230  | 304  | 6.76808469351 |               |
| NM_005702 | ERAL1    | 1262 | 1336 | 7.18312219279 |               |
| NM_005702 | ERAL1    | 577  | 670  | 6.76809142456 |               |
| NM_005702 | ERAL1    | 15   | 83   | 6.09898971446 |               |
| NM_005702 | ERAL1    | 698  | 792  | 6.18312868792 |               |
| NM_005702 | ERAL1    | 441  | 503  | 6.09898971446 |               |
| NM_005702 | ERAL1    | 849  | 942  | 5.18312892384 |               |
| NM_005700 | DPP3     | 1727 | 1792 | 7.39540624077 |               |
| NM_005700 | DPP3     | 2271 | 2345 | 7.98036874149 |               |
| NM_005700 | DPP3     | 726  | 787  | 6.39540600485 |               |
| NM_005700 | DPP3     | 1061 | 1194 | 7.98036874149 |               |
| NM_005700 | DPP3     | 2576 | 2692 | 6.39540623322 |               |
| NM_005700 | DPP3     | 1814 | 1960 | 8.39540624077 |               |
| NM_005700 | DPP3     | 474  | 543  | 5.39540624077 |               |
| NM_005700 | DPP3     | 429  | 468  | 5.31126703139 |               |
| NM_005700 | DPP3     | 543  | 686  | 8.71733433566 |               |

|              |          |      |      |                    |
|--------------|----------|------|------|--------------------|
| NM_005700    | DPP3     | 2420 | 2574 | 8.85483785941      |
| NM_005700    | DPP3     | 907  | 1056 | 8.56533124221      |
| NM_005700    | DPP3     | 1964 | 2249 | 10.0392624305      |
| NM_005700    | DPP3     | 814  | 903  | 5.39540624077      |
| NM_005700    | DPP3     | 2811 | 2923 | 8.71733433566      |
| NM_005700    | DPP3     | 2728 | 2811 | 6.39540624077      |
| NM_005700    | DPP3     | 1376 | 1724 | 9.91896819683      |
| NM_006512    | SAA4     | 46   | 109  | 7.58602222434      |
| NM_006512    | SAA4     | 397  | 471  | 7.58602895539      |
| NM_006512    | SAA4     | 481  | 559  | 8.58602895517      |
| NM_176877    | INADL    | 5111 | 5165 | 7.28468486086      |
| NM_176877    | INADL    | 1555 | 1617 | 7.36881733919      |
| NM_176877    | INADL    | 1696 | 1799 | 7.36882407002      |
| NM_176877    | INADL    | 5312 | 5360 | 7.36865031992      |
| NM_176877    | INADL    | 725  | 783  | 7.95377983991      |
| NM_176877    | INADL    | 3203 | 3277 | 6.36480647007      |
| NM_176877    | INADL    | 2625 | 2702 | 7.36865031992      |
| NM_176877    | INADL    | 2106 | 2172 | 7.94976897079      |
| NM_176877    | INADL    | 4669 | 4768 | 8.36882407024      |
| NM_176877    | INADL    | 1991 | 2096 | 8.95378657096      |
| NM_176877    | INADL    | 2242 | 2303 | 6.36881733919      |
| NM_176877    | INADL    | 1201 | 1270 | 7.36882407024      |
| NM_176877    | INADL    | 2332 | 2391 | 7.86964736158      |
| NM_176877    | INADL    | 1484 | 1536 | 6.36865031992      |
| NM_176877    | INADL    | 414  | 469  | 7.28468486086      |
| NM_176877    | INADL    | 176  | 217  | 7.28468486086      |
| NM_176877    | INADL    | 3707 | 3914 | 9.36882407024      |
| NM_176877    | INADL    | 3291 | 3409 | 7.95378657096      |
| NM_176877    | INADL    | 3458 | 3532 | 6.36882383432      |
| NM_057175    | NAA15    | 2668 | 2743 | 6.42252998719      |
| NM_057175    | NAA15    | 3704 | 3767 | 7.00347512366      |
| NM_057175    | NAA15    | 2887 | 2943 | 6.42252998719      |
| NM_057175    | NAA15    | 2759 | 2835 | 5.41851262294      |
| NM_057175    | NAA15    | 2233 | 2277 | 5.33839101373      |
| NM_057175    | NAA15    | 1137 | 1192 | 7.00748599278      |
| NM_057175    | NAA15    | 295  | 366  | 7.74445831799      |
| NM_057175    | NAA15    | 851  | 914  | 5.42252349206      |
| NM_057175    | NAA15    | 3256 | 3361 | 7.42253022311      |
| NM_057175    | NAA15    | 432  | 562  | 8.00749272383      |
| NM_001139490 | TRAF3IP1 |      | 3168 | 3249 5.82506794355 |
| NM_001287    | CLCN7    | 2028 | 2076 | 9.44478612246      |
| NM_001287    | CLCN7    | 2429 | 2459 | 7.3606469133       |
| NM_001287    | CLCN7    | 455  | 502  | 8.44478588676      |
| NM_001287    | CLCN7    | 1248 | 1326 | 8.44478612268      |
| NM_001287    | CLCN7    | 1690 | 1745 | 8.44478611513      |
| NM_001287    | CLCN7    | 2793 | 2841 | 7.44478612268      |
| NM_001287    | CLCN7    | 1896 | 1961 | 7.44478588676      |
| NM_001287    | CLCN7    | 884  | 958  | 7.44478612268      |
| NM_001287    | CLCN7    | 1378 | 1452 | 9.44478612268      |
| NM_001287    | CLCN7    | 387  | 447  | 8.44478611513      |

|           |       |      |      |               |
|-----------|-------|------|------|---------------|
| NM_001287 | CLCN7 | 2958 | 2993 | 7.44478612246 |
| NM_001287 | CLCN7 | 3299 | 3355 | 8.44478588676 |
| NM_001287 | CLCN7 | 256  | 361  | 10.0297486234 |
| NM_001287 | CLCN7 | 3140 | 3219 | 9.02974862318 |
| NM_001287 | CLCN7 | 747  | 858  | 10.0297486234 |
| NM_001287 | CLCN7 | 1758 | 1893 | 9.0297486234  |
| NM_001287 | CLCN7 | 1465 | 1510 | 7.3606469133  |
| NM_001287 | CLCN7 | 503  | 706  | 11.2521410447 |
| NM_001287 | CLCN7 | 1034 | 1218 | 10.7667142176 |
| NM_001287 | CLCN7 | 1518 | 1688 | 9.76671421757 |
| NM_001284 | AP3S1 | 810  | 857  | 6.35225914407 |
| NM_001284 | AP3S1 | 277  | 369  | 6.93722164479 |
| NM_001282 | AP2B1 | 1079 | 1124 | 4.12386750198 |
| NM_001282 | AP2B1 | 1997 | 2055 | 6.44579583279 |
| NM_001282 | AP2B1 | 3152 | 3203 | 4.12386773035 |
| NM_001282 | AP2B1 | 640  | 687  | 5.70883023862 |
| NM_001282 | AP2B1 | 3020 | 3129 | 6.70883023862 |
| NM_001282 | AP2B1 | 1450 | 1529 | 6.1238677379  |
| NM_001282 | AP2B1 | 3221 | 3272 | 5.1238677379  |
| NM_001282 | AP2B1 | 2633 | 2688 | 4.11985013773 |
| NM_001282 | AP2B1 | 63   | 137  | 5.12386773035 |
| NM_001282 | AP2B1 | 5503 | 5569 | 5.7088302384  |
| NM_001282 | AP2B1 | 961  | 1040 | 6.1238677379  |
| NM_001282 | AP2B1 | 2908 | 2988 | 6.44579583279 |
| NM_001282 | AP2B1 | 2531 | 2574 | 4.11985013773 |
| NM_001282 | AP2B1 | 1529 | 1606 | 6.1238677379  |
| NM_001282 | AP2B1 | 3313 | 3349 | 4.03972852852 |
| NM_001282 | AP2B1 | 2575 | 2609 | 5.03972852852 |
| NM_001282 | AP2B1 | 4053 | 4113 | 4.11985013773 |
| NM_001282 | AP2B1 | 2338 | 2463 | 5.70883023862 |
| NM_001282 | AP2B1 | 5177 | 5244 | 4.11985013773 |
| NM_001282 | AP2B1 | 2190 | 2337 | 7.1238677379  |
| NM_001282 | AP2B1 | 2791 | 2906 | 6.93122265996 |
| NM_001282 | AP2B1 | 3805 | 3885 | 5.70865648831 |
| NM_001282 | AP2B1 | 268  | 420  | 6.70883023862 |
| NM_001282 | AP2B1 | 449  | 640  | 7.44579583279 |
| NM_001282 | AP2B1 | 153  | 266  | 5.1238677379  |
| NM_001282 | AP2B1 | 4275 | 4376 | 6.44579582524 |
| NM_001282 | AP2B1 | 727  | 949  | 6.70883023862 |
| NM_001282 | AP2B1 | 3651 | 3793 | 5.1238677379  |
| NM_001282 | AP2B1 | 1165 | 1417 | 7.93122265996 |
| NM_001282 | AP2B1 | 1729 | 1940 | 6.44579583279 |
| NM_001283 | AP1S1 | 543  | 574  | 6.11693317344 |
| NM_001283 | AP1S1 | 664  | 741  | 7.12095077362 |
| NM_001283 | AP1S1 | 591  | 650  | 5.53598827289 |
| NM_001283 | AP1S1 | 148  | 200  | 5.53598154184 |
| NM_001283 | AP1S1 | 215  | 281  | 5.53581452258 |
| NM_001283 | AP1S1 | 283  | 454  | 8.34334319495 |
| NM_001280 | CIRBP | 574  | 629  | 3.66345391979 |
| NM_001280 | CIRBP | 1047 | 1167 | 3.66345392734 |

|              |         |      |      |               |
|--------------|---------|------|------|---------------|
| NM_001280    | CIRBP   | 264  | 421  | 5.07849142662 |
| NM_001280    | CIRBP   | 167  | 260  | 4.40041952151 |
| NM_001280    | CIRBP   | 639  | 838  | 4.88584634868 |
| NM_001280    | CIRBP   | 60   | 138  | 3.07849142662 |
| NM_001281    | TBCB    | 1228 | 1342 | 8.13642260381 |
| NM_001281    | TBCB    | 1349 | 1461 | 6.13642260381 |
| NM_001281    | TBCB    | 1101 | 1227 | 7.45835069869 |
| NM_001288    | CLIC1   | 817  | 856  | 1.07878546011 |
| NM_001288    | CLIC1   | 1107 | 1215 | 3.89015798234 |
| NM_001288    | CLIC1   | 241  | 816  | 7.49219399642 |
| NM_001288    | CLIC1   | 859  | 1103 | 4.89015798234 |
| NM_001288    | CLIC1   | 49   | 198  | 5.40473115517 |
| NM_206891    | DIP2A   | 1830 | 1885 | 7.71871031859 |
| NM_022449    | RAB17   | 1849 | 1916 | 4.70033831892 |
| NM_022449    | RAB17   | 266  | 296  | 3.61619910954 |
| NM_022449    | RAB17   | 755  | 808  | 3.700338083   |
| NM_022449    | RAB17   | 1034 | 1081 | 4.70033158787 |
| NM_022449    | RAB17   | 1348 | 1402 | 3.700338083   |
| NM_022449    | RAB17   | 1754 | 1802 | 3.70033831892 |
| NM_022449    | RAB17   | 97   | 160  | 5.7001645686  |
| NM_022449    | RAB17   | 551  | 632  | 6.02226641381 |
| NM_022449    | RAB17   | 453  | 542  | 5.70033831892 |
| NM_022449    | RAB17   | 1498 | 1577 | 4.700338083   |
| NM_007069    | PLA2G16 | 445  | 487  | 9.70940463985 |
| NM_007069    | PLA2G16 | 498  | 548  | 9.29436714057 |
| NM_015584    | POLDIP2 | 316  | 391  | 6.71988470213 |
| NM_015584    | POLDIP2 | 1278 | 1335 | 6.13491547035 |
| NM_015584    | POLDIP2 | 909  | 1023 | 7.13492220141 |
| NM_015584    | POLDIP2 | 1601 | 1665 | 6.13492220118 |
| NM_015584    | POLDIP2 | 537  | 655  | 8.30484720285 |
| NM_015584    | POLDIP2 | 398  | 475  | 7.45685029629 |
| NM_015584    | POLDIP2 | 1335 | 1373 | 6.13491547035 |
| NM_015584    | POLDIP2 | 1121 | 1202 | 7.45685029629 |
| NM_015584    | POLDIP2 | 689  | 907  | 8.30484720285 |
| NM_015584    | POLDIP2 | 1684 | 1854 | 7.94227712346 |
| NM_015584    | POLDIP2 | 1904 | 2026 | 7.13492220141 |
| NM_001008388 | CISD2   | 417  | 510  | 6.70339792203 |
| NM_001008388 | CISD2   | 332  | 415  | 8.02532601692 |
| NM_001008388 | CISD2   | 1515 | 1544 | 6.61925871265 |
| NM_001008388 | CISD2   | 881  | 937  | 8.02532601691 |
| NM_001008388 | CISD2   | 756  | 833  | 7.28836042275 |
| NM_001008388 | CISD2   | 84   | 291  | 9.16282954067 |
| NM_001008388 | CISD2   | 563  | 743  | 9.51075284409 |
| NM_015589    | SAMD4A  | 2019 | 2089 | 6.07937712617 |
| NM_015589    | SAMD4A  | 62   | 149  | 7.74847883627 |
| NM_015589    | SAMD4A  | 785  | 886  | 6.16351633554 |
| NM_032873    | UBASH3B | 1763 | 1812 | 10.6230531992 |
| NM_032873    | UBASH3B | 1076 | 1137 | 11.7031748084 |
| NM_032873    | UBASH3B | 33   | 99   | 11.7071856775 |
| NM_032873    | UBASH3B | 1585 | 1642 | 11.6230531992 |

|              |        |      |      |               |
|--------------|--------|------|------|---------------|
| NM_016172    | UBAC1  | 1521 | 1575 | 6.33090261943 |
| NM_001143852 | TCHP   | 2975 | 3014 | 7.04758374592 |
| NM_016176    | SDF4   | 1792 | 1867 | 4.43079402874 |
| NM_016176    | SDF4   | 1349 | 1421 | 1.62343910667 |
| NM_016176    | SDF4   | 1660 | 1773 | 4.62343910668 |
| NM_016176    | SDF4   | 842  | 1013 | 5.2084016074  |
| NM_016176    | SDF4   | 1025 | 1348 | 6.01575652946 |
| NM_016176    | SDF4   | 367  | 834  | 7.17802795836 |
| NM_016176    | SDF4   | 106  | 321  | 5.62343910668 |
| NM_016176    | SDF4   | 1465 | 1620 | 3.94536720156 |
| NM_013986    | EWSR1  | 2414 | 2473 | 4.97737461252 |
| NM_013986    | EWSR1  | 1074 | 1153 | 3.9773743766  |
| NM_013986    | EWSR1  | 1158 | 1253 | 4.56233711324 |
| NM_013986    | EWSR1  | 1674 | 1712 | 2.89323540314 |
| NM_013986    | EWSR1  | 2475 | 2509 | 3.9772008622  |
| NM_013986    | EWSR1  | 2065 | 2116 | 2.97737461252 |
| NM_013986    | EWSR1  | 1603 | 1654 | 4.56233687732 |
| NM_013986    | EWSR1  | 1878 | 1978 | 4.56233711324 |
| NM_013986    | EWSR1  | 434  | 555  | 5.56233711324 |
| NM_013986    | EWSR1  | 2514 | 2645 | 5.56233711324 |
| NM_013986    | EWSR1  | 284  | 412  | 4.56233711324 |
| NM_013986    | EWSR1  | 751  | 796  | 2.89323540314 |
| NM_013986    | EWSR1  | 623  | 682  | 2.89323540314 |
| NM_013986    | EWSR1  | 2140 | 2374 | 5.29930270741 |
| NM_013986    | EWSR1  | 826  | 1038 | 6.43680623116 |
| NM_013986    | EWSR1  | 1257 | 1577 | 7.73226211469 |
| NM_007062    | PWP1   | 905  | 961  | 5.75931296138 |
| NM_007062    | PWP1   | 456  | 528  | 5.75931296871 |
| NM_007062    | PWP1   | 1156 | 1199 | 4.17033286803 |
| NM_007062    | PWP1   | 623  | 767  | 6.75931296893 |
| NM_007062    | PWP1   | 1657 | 1804 | 6.98170539026 |
| NM_007062    | PWP1   | 322  | 415  | 4.17435046821 |
| NM_001178084 | ZFX    | 4845 | 4918 | 6.21032086905 |
| NM_001178084 | ZFX    | 1438 | 1490 | 4.54121915894 |
| NM_001178084 | ZFX    | 4623 | 4684 | 4.62518461801 |
| NM_001178084 | ZFX    | 890  | 965  | 4.62535836078 |
| NM_001178084 | ZFX    | 1908 | 1958 | 6.62535163727 |
| NM_001178084 | ZFX    | 3767 | 3835 | 5.54121915894 |
| NM_001178084 | ZFX    | 5205 | 5263 | 5.62134076815 |
| NM_001178084 | ZFX    | 3131 | 3267 | 6.62535836832 |
| NM_001178084 | ZFX    | 3282 | 3361 | 5.62518461801 |
| NM_001178084 | ZFX    | 760  | 808  | 4.62134076815 |
| NM_001178084 | ZFX    | 2237 | 2334 | 6.62535836832 |
| NM_001178084 | ZFX    | 224  | 331  | 7.21032086905 |
| NM_001178084 | ZFX    | 517  | 669  | 7.21032086905 |
| NM_001178084 | ZFX    | 4252 | 4301 | 4.62134076815 |
| NM_001178081 | STAT6  | 1829 | 1871 | 6.50619883519 |
| NM_001178081 | STAT6  | 3179 | 3262 | 6.59033131352 |
| NM_033089    | ZCCHC3 | 1760 | 1808 | 5.78271263757 |
| NM_033089    | ZCCHC3 | 1476 | 1542 | 7.4477967475  |

|              |        |      |      |               |
|--------------|--------|------|------|---------------|
| NM_033089    | ZCCHC3 | 1812 | 1861 | 5.86667809664 |
| NM_033089    | ZCCHC3 | 777  | 839  | 5.86283424678 |
| NM_033088    | FAM40A | 1976 | 2043 | 7.20313341794 |
| NM_033088    | FAM40A | 2579 | 2645 | 6.70230989069 |
| NM_033081    | DID01  | 2362 | 2428 | 5.50007869531 |
| NM_033081    | DID01  | 2469 | 2496 | 5.50007869531 |
| NM_033081    | DID01  | 3334 | 3390 | 6.50408956442 |
| NM_033081    | DID01  | 2888 | 2963 | 4.50409629548 |
| NM_033081    | DID01  | 5414 | 5458 | 5.50409628793 |
| NM_033081    | DID01  | 4653 | 4744 | 5.50409629548 |
| NM_033081    | DID01  | 6771 | 6818 | 5.41995708609 |
| NM_033081    | DID01  | 3594 | 3730 | 5.50409629548 |
| NM_033081    | DID01  | 7602 | 7652 | 4.50408956442 |
| NM_033081    | DID01  | 3818 | 3891 | 4.50409629548 |
| NM_033081    | DID01  | 3112 | 3157 | 4.50007869531 |
| NM_033081    | DID01  | 7518 | 7562 | 4.50007869531 |
| NM_033081    | DID01  | 3977 | 4022 | 4.50409628793 |
| NM_033081    | DID01  | 106  | 272  | 7.67402129692 |
| NM_033081    | DID01  | 2998 | 3109 | 5.50409628793 |
| NM_033081    | DID01  | 7118 | 7231 | 6.0890587962  |
| NM_033081    | DID01  | 3395 | 3533 | 5.50409629548 |
| NM_033081    | DID01  | 1193 | 1304 | 6.82602439037 |
| NM_033081    | DID01  | 7913 | 8011 | 6.0890587962  |
| NM_033081    | DID01  | 1370 | 1480 | 5.50409629548 |
| NM_033083    | EAF1   | 2778 | 2824 | 7.54181593042 |
| NM_033083    | EAF1   | 3187 | 3250 | 7.62595490389 |
| NM_033083    | EAF1   | 656  | 763  | 8.21091763298 |
| NM_033082    | SARNP  | 339  | 414  | 5.39315562098 |
| NM_033082    | SARNP  | 593  | 657  | 4.07122751855 |
| NM_033082    | SARNP  | 494  | 583  | 4.6561897909  |
| NM_004330    | BNIP2  | 1094 | 1169 | 5.54157927754 |
| NM_033087    | ALG2   | 1141 | 1182 | 6.56270831199 |
| NM_033087    | ALG2   | 1779 | 1837 | 8.23181002209 |
| NM_033087    | ALG2   | 1583 | 1646 | 7.64684752137 |
| NM_033087    | ALG2   | 1033 | 1129 | 8.64684751382 |
| NM_033087    | ALG2   | 839  | 952  | 9.23181002209 |
| NM_033087    | ALG2   | 739  | 836  | 8.64684752137 |
| NM_033087    | ALG2   | 1319 | 1412 | 7.64684752137 |
| NM_033087    | ALG2   | 427  | 583  | 9.23181002209 |
| NM_001040196 | AGTRAP | 569  | 627  | 9.79393826632 |
| NM_001040196 | AGTRAP | 399  | 442  | 10.3827446169 |
| NM_001040196 | AGTRAP | 111  | 174  | 9.79393826632 |
| NM_001752    | CAT    | 374  | 429  | 6.38518006531 |
| NM_001752    | CAT    | 1518 | 1595 | 7.89002095682 |
| NM_001752    | CAT    | 1164 | 1240 | 9.19655258754 |
| NM_001752    | CAT    | 780  | 823  | 7.38919765793 |
| NM_001752    | CAT    | 135  | 193  | 7.9741601662  |
| NM_001752    | CAT    | 1714 | 1774 | 6.3050584561  |
| NM_001752    | CAT    | 208  | 307  | 9.19655258754 |
| NM_001752    | CAT    | 596  | 725  | 9.9741601662  |

|           |          |      |      |                    |
|-----------|----------|------|------|--------------------|
| NM_001752 | CAT      | 1398 | 1490 | 8.38919766548      |
| NM_001752 | CAT      | 938  | 1032 | 7.9741601662       |
| NM_199368 | TRPC4AP  | 1519 | 1579 | 4.00614707439      |
| NM_199368 | TRPC4AP  | 1438 | 1489 | 4.0862686836       |
| NM_199368 | TRPC4AP  | 204  | 278  | 4.09011253345      |
| NM_199368 | TRPC4AP  | 676  | 729  | 4.09028628376      |
| NM_199368 | TRPC4AP  | 896  | 959  | 5.67524877694      |
| NM_199368 | TRPC4AP  | 1153 | 1206 | 4.0862686836       |
| NM_199368 | TRPC4AP  | 762  | 837  | 4.09028627622      |
| NM_199368 | TRPC4AP  | 421  | 561  | 6.41221437866      |
| NM_199368 | TRPC4AP  | 1874 | 1941 | 5.09028628355      |
| NM_199368 | TRPC4AP  | 2188 | 2278 | 6.41221437866      |
| NM_199368 | TRPC4AP  | 2309 | 2387 | 5.09028627622      |
| NM_199368 | TRPC4AP  | 2874 | 2969 | 6.67524878449      |
| NM_001756 | SERPINA6 |      | 1014 | 1318 9.85014457145 |
| NM_001756 | SERPINA6 |      | 394  | 539 7.99216357632  |
| NM_001756 | SERPINA6 |      | 60   | 351 9.51572553238  |
| NM_001756 | SERPINA6 |      | 544  | 805 9.94635988671  |
| NM_001756 | SERPINA6 |      | 807  | 979 9.31409167121  |
| NM_015913 | TXNDC12  | 954  | 1034 | 5.16709754001      |
| NM_015913 | TXNDC12  | 1698 | 1750 | 5.16709753979      |
| NM_015913 | TXNDC12  | 2291 | 2333 | 4.58212830824      |
| NM_015913 | TXNDC12  | 1255 | 1422 | 7.4890256349       |
| NM_015913 | TXNDC12  | 1104 | 1252 | 7.75206004073      |
| NM_015913 | TXNDC12  | 1490 | 1560 | 5.58213503929      |
| NM_015913 | TXNDC12  | 2165 | 2279 | 4.58213503929      |
| NM_015913 | TXNDC12  | 1801 | 2030 | 6.58213503929      |
| NM_015914 | TXNDC11  | 591  | 650  | 6.58295555212      |
| NM_015914 | TXNDC11  | 1891 | 1932 | 5.99397545122      |
| NM_015914 | TXNDC11  | 403  | 467  | 7.31992114628      |
| NM_015914 | TXNDC11  | 2631 | 2702 | 4.99781930108      |
| NM_015914 | TXNDC11  | 2885 | 2940 | 4.99798632034      |
| NM_015914 | TXNDC11  | 2358 | 2416 | 6.99799305139      |
| NM_015914 | TXNDC11  | 889  | 940  | 4.91385384201      |
| NM_015914 | TXNDC11  | 735  | 797  | 6.58295555211      |
| NM_015914 | TXNDC11  | 1725 | 1861 | 6.58295555212      |
| NM_015914 | TXNDC11  | 2119 | 2290 | 7.58295555212      |
| NM_015918 | POP5     | 213  | 323  | 9.11961581004      |
| NM_138418 | FAM195A  | 695  | 831  | 11.2358838858      |
| NM_138419 | FAM54A   | 304  | 362  | 9.57231795902      |
| NM_032927 | TMEM128  | 802  | 840  | 11.0108163557      |
| NM_001134 | AFP      | 1419 | 1557 | 0.89584455499      |
| NM_001134 | AFP      | 702  | 785  | 0.136852654494     |
| NM_001134 | AFP      | 651  | 695  | -2.64772627303     |
| NM_001134 | AFP      | 1560 | 2009 | 3.03632577854      |
| NM_001134 | AFP      | 799  | 1414 | 2.79396494097      |
| NM_001134 | AFP      | 60   | 640  | 2.89584455499      |
| NM_001130 | AES      | 983  | 1043 | 3.91802099711      |
| NM_001130 | AES      | 693  | 786  | 4.50299022888      |
| NM_001130 | AES      | 811  | 886  | 4.91802772816      |

|              |            |      |      |               |               |
|--------------|------------|------|------|---------------|---------------|
| NM_001130    | AES        | 474  | 560  | 4.50299022888 |               |
| NM_001130    | AES        | 177  | 292  | 6.23995582305 |               |
| NM_001130    | AES        | 1055 | 1160 | 3.91802772816 |               |
| NM_001130    | AES        | 299  | 446  | 6.3774593468  |               |
| NM_001141980 | TP53BP1    | 4572 | 4611 | 9.03028590161 |               |
| NM_001141980 | TP53BP1    | 1190 | 1229 | 8.44130603663 |               |
| NM_001141980 | TP53BP1    | 5538 | 5569 | 8.36118442742 |               |
| NM_001141980 | TP53BP1    | 1038 | 1103 | 8.44514988649 |               |
| NM_001141980 | TP53BP1    | 1732 | 1780 | 7.44130603663 |               |
| NM_001135162 | COMT       | 970  | 1017 | 5.41370637272 |               |
| NM_001135162 | COMT       | 616  | 905  | 9.11414609087 |               |
| NM_001135162 | COMT       | 1022 | 1275 | 8.93726832878 |               |
| NM_001135162 | COMT       | 129  | 615  | 9.58363137417 |               |
| NM_000884    | IMPDH2     | 589  | 655  | 4.6998376979  |               |
| NM_000884    | IMPDH2     | 728  | 798  | 4.37790960324 |               |
| NM_000884    | IMPDH2     | 884  | 976  | 3.37790960324 |               |
| NM_000884    | IMPDH2     | 1408 | 1446 | 3.37790936732 |               |
| NM_000884    | IMPDH2     | 113  | 184  | 3.37790936732 |               |
| NM_000884    | IMPDH2     | 1451 | 1489 | 4.37773585292 |               |
| NM_000884    | IMPDH2     | 1242 | 1274 | 3.37389200307 |               |
| NM_000884    | IMPDH2     | 1500 | 1560 | 3.37790287219 |               |
| NM_000884    | IMPDH2     | 354  | 433  | 3.96287210396 |               |
| NM_000884    | IMPDH2     | 1296 | 1368 | 3.96287210395 |               |
| NM_000884    | IMPDH2     | 186  | 303  | 4.96287210396 |               |
| NM_001204890 | ISY1-RAB43 |      | 2095 | 2164          | 9.23715314564 |
| NM_001204890 | ISY1-RAB43 |      | 1838 | 1881          | 6.42962447326 |
| NM_001204890 | ISY1-RAB43 |      | 3401 | 3457          | 8.0147607243  |
| NM_001204890 | ISY1-RAB43 |      | 2328 | 2377          | 6.42979821603 |
| NM_001204890 | ISY1-RAB43 |      | 1339 | 1399          | 8.01476048838 |
| NM_001204890 | ISY1-RAB43 |      | 4822 | 4887          | 6.42979822336 |
| NM_001204890 | ISY1-RAB43 |      | 329  | 375           | 7.42979149253 |
| NM_001204890 | ISY1-RAB43 |      | 3357 | 3393          | 6.3456590142  |
| NM_001204890 | ISY1-RAB43 |      | 2641 | 2681          | 6.42578062341 |
| NM_001204890 | ISY1-RAB43 |      | 1482 | 1540          | 7.42979149253 |
| NM_001204890 | ISY1-RAB43 |      | 2212 | 2258          | 6.42578062341 |
| NM_001204890 | ISY1-RAB43 |      | 662  | 728           | 7.42979149253 |
| NM_001204890 | ISY1-RAB43 |      | 3070 | 3146          | 6.42979149253 |
| NM_001204890 | ISY1-RAB43 |      | 1213 | 1312          | 7.42979822358 |
| NM_001204890 | ISY1-RAB43 |      | 3794 | 3858          | 6.42979822336 |
| NM_001204890 | ISY1-RAB43 |      | 4093 | 4198          | 8.0147607243  |
| NM_000661    | RPL9       | 663  | 742  | 2.29896368731 |               |
| NM_000661    | RPL9       | 31   | 663  | 6.63286442387 |               |
| NM_000660    | TGFB1      | 1467 | 1563 | 8.25722385376 |               |
| NM_000660    | TGFB1      | 174  | 237  | 6.44986220065 |               |
| NM_000660    | TGFB1      | 2013 | 2064 | 6.4498689317  |               |
| NM_000660    | TGFB1      | 685  | 766  | 5.4498689317  |               |
| NM_000660    | TGFB1      | 1414 | 1459 | 5.44986220065 |               |
| NM_000660    | TGFB1      | 268  | 336  | 6.4498689317  |               |
| NM_000660    | TGFB1      | 1277 | 1406 | 9.15030864984 |               |
| NM_000660    | TGFB1      | 441  | 685  | 9.35675952731 |               |



|              |           |      |      |                    |
|--------------|-----------|------|------|--------------------|
| NM_000660    | TGFB1     | 921  | 1054 | 8.77179702659      |
| NM_000660    | TGFB1     | 1570 | 1690 | 7.4498689317       |
| NM_000660    | TGFB1     | 1694 | 1943 | 9.4498689317       |
| NM_001142726 | C1orf122  |      | 883  | 949 6.80103511531  |
| NM_001042734 | SEC24B    | 3092 | 3166 | 8.18209962358      |
| NM_001042734 | SEC24B    | 1928 | 1982 | 8.68694051509      |
| NM_001042734 | SEC24B    | 1832 | 1906 | 7.18209962358      |
| NM_001042734 | SEC24B    | 865  | 926  | 8.18594347343      |
| NM_001042734 | SEC24B    | 3416 | 3452 | 8.68694051509      |
| NM_001042734 | SEC24B    | 599  | 655  | 7.10197801436      |
| NM_024874    | KIAA0319L |      | 3060 | 3130 7.71005291494 |
| NM_024874    | KIAA0319L |      | 963  | 1015 8.12508368316 |
| NM_024874    | KIAA0319L |      | 1902 | 1949 6.12107281404 |
| NM_024874    | KIAA0319L |      | 596  | 646 6.12508368316  |
| NM_024874    | KIAA0319L |      | 3237 | 3289 7.12107281404 |
| NM_024874    | KIAA0319L |      | 3297 | 3359 7.12509040667 |
| NM_024874    | KIAA0319L |      | 1282 | 1321 7.12508368316 |
| NM_024874    | KIAA0319L |      | 2875 | 2936 7.71005267902 |
| NM_024874    | KIAA0319L |      | 646  | 702 7.71005290739  |
| NM_024874    | KIAA0319L |      | 3015 | 3056 6.12508368316 |
| NM_024874    | KIAA0319L |      | 1171 | 1224 8.1249166639  |
| NM_024874    | KIAA0319L |      | 4560 | 4608 6.125090414   |
| NM_024874    | KIAA0319L |      | 1343 | 1446 8.12509041422 |
| NM_024874    | KIAA0319L |      | 2477 | 2528 6.12107281404 |
| NM_024874    | KIAA0319L |      | 468  | 542 7.71005291472  |
| NM_024874    | KIAA0319L |      | 1784 | 1845 7.1250901783  |
| NM_024874    | KIAA0319L |      | 1641 | 1742 8.71005291494 |
| NM_024874    | KIAA0319L |      | 2939 | 3012 7.71005290739 |
| NM_024874    | KIAA0319L |      | 1963 | 2036 6.1249166639  |
| NM_024874    | KIAA0319L |      | 4482 | 4559 7.12509041422 |
| NM_024874    | KIAA0319L |      | 207  | 276 7.12509041421  |
| NM_024874    | KIAA0319L |      | 2190 | 2308 8.12509041422 |
| NM_175573    | ADRM1     | 777  | 844  | 4.31240996634      |
| NM_175573    | ADRM1     | 928  | 977  | 4.89737919789      |
| NM_175573    | ADRM1     | 1004 | 1082 | 4.89737919811      |
| NM_175573    | ADRM1     | 1216 | 1333 | 4.89737919811      |
| NM_175573    | ADRM1     | 644  | 727  | 3.31241669739      |
| NM_175573    | ADRM1     | 268  | 563  | 8.17039769252      |
| NM_175573    | ADRM1     | 568  | 643  | 4.31241669739      |
| NM_032095    | PCDHGB1   | 1351 | 1400 | 12.3485294057      |
| NM_032095    | PCDHGB1   | 913  | 979  | 11.7595495408      |
| NM_032095    | PCDHGB1   | 277  | 352  | 12.3485229106      |
| NM_003286    | TOP1      | 63   | 144  | 2.69770607643      |
| NM_003286    | TOP1      | 3646 | 3718 | 3.28266857716      |
| NM_003286    | TOP1      | 2844 | 2901 | 2.69753232612      |
| NM_003286    | TOP1      | 3485 | 3520 | 1.69368847626      |
| NM_003286    | TOP1      | 2513 | 2548 | 3.69769934538      |
| NM_003286    | TOP1      | 2377 | 2442 | 3.69770607643      |
| NM_003286    | TOP1      | 587  | 627  | 2.69753232612      |
| NM_003286    | TOP1      | 4    | 41   | 3.28249482684      |

|           |        |      |      |               |
|-----------|--------|------|------|---------------|
| NM_003286 | TOP1   | 1353 | 1464 | 4.50506099849 |
| NM_003286 | TOP1   | 1216 | 1343 | 4.50506099849 |
| NM_003286 | TOP1   | 2577 | 2637 | 2.69753232612 |
| NM_003286 | TOP1   | 834  | 923  | 3.28266856961 |
| NM_003286 | TOP1   | 3270 | 3376 | 4.28266857716 |
| NM_003286 | TOP1   | 1525 | 1695 | 5.15713769507 |
| NM_003286 | TOP1   | 2744 | 2832 | 3.69770607643 |
| NM_003286 | TOP1   | 2961 | 3128 | 3.69770607643 |
| NM_003286 | TOP1   | 1027 | 1121 | 2.69770607643 |
| NM_003286 | TOP1   | 2157 | 2300 | 4.28266857716 |
| NM_003286 | TOP1   | 268  | 379  | 2.69770607643 |
| NM_003286 | TOP1   | 1787 | 2155 | 6.28266857716 |
| NM_003286 | TOP1   | 1716 | 1777 | 4.01963416377 |
| NM_004949 | DSC2   | 2379 | 2431 | 4.62590206582 |
| NM_004949 | DSC2   | 2568 | 2657 | 7.21488216672 |
| NM_004949 | DSC2   | 1421 | 1481 | 6.62991943008 |
| NM_004949 | DSC2   | 3859 | 3955 | 6.62991966599 |
| NM_004949 | DSC2   | 713  | 775  | 5.62991965845 |
| NM_004949 | DSC2   | 3195 | 3258 | 6.95184102983 |
| NM_004949 | DSC2   | 3967 | 4042 | 5.62991966599 |
| NM_004949 | DSC2   | 577  | 634  | 6.21488215917 |
| NM_004949 | DSC2   | 2438 | 2469 | 6.21487543566 |
| NM_004949 | DSC2   | 2490 | 2522 | 5.62974591568 |
| NM_004949 | DSC2   | 3595 | 3683 | 5.62991966599 |
| NM_004949 | DSC2   | 642  | 670  | 5.54578045661 |
| NM_004949 | DSC2   | 1209 | 1336 | 7.79984466744 |
| NM_004949 | DSC2   | 2127 | 2274 | 7.79984466744 |
| NM_004949 | DSC2   | 1690 | 1729 | 5.62991943008 |
| NM_004949 | DSC2   | 3790 | 3835 | 6.13074295733 |
| NM_004949 | DSC2   | 1800 | 1928 | 7.21488216672 |
| NM_004949 | DSC2   | 3070 | 3194 | 7.21488216672 |
| NM_004949 | DSC2   | 3522 | 3587 | 6.2148819308  |
| NM_004949 | DSC2   | 468  | 540  | 4.62991966599 |
| NM_004949 | DSC2   | 1738 | 1777 | 6.13074295733 |
| NM_004949 | DSC2   | 1503 | 1645 | 7.79984466744 |
| NM_004949 | DSC2   | 981  | 1143 | 8.71738250725 |
| NM_004949 | DSC2   | 840  | 968  | 6.62991966599 |
| NM_004949 | DSC2   | 2275 | 2376 | 7.21488216672 |
| NM_004949 | DSC2   | 2730 | 2836 | 5.62991966599 |
| NM_004949 | DSC2   | 4089 | 4236 | 6.21488216672 |
| NM_000701 | ATP1A1 | 64   | 3746 | 10.6882951526 |
| NM_004943 | DMWD   | 2596 | 2658 | 10.3831559848 |
| NM_004943 | DMWD   | 2290 | 2337 | 10.3831557489 |
| NM_004943 | DMWD   | 1334 | 1447 | 10.9681184855 |
| NM_004943 | DMWD   | 2474 | 2530 | 10.3831559772 |
| NM_004943 | DMWD   | 2123 | 2189 | 10.3831559848 |
| NM_004943 | DMWD   | 2344 | 2387 | 9.3791383846  |
| NM_004943 | DMWD   | 551  | 735  | 11.3831559848 |
| NM_004941 | DHX8   | 948  | 1004 | 5.75414286089 |
| NM_004941 | DHX8   | 2623 | 2659 | 6.33508776166 |

|              |         |      |      |               |
|--------------|---------|------|------|---------------|
| NM_004941    | DHX8    | 1991 | 2044 | 6.33910536183 |
| NM_004941    | DHX8    | 2115 | 2185 | 6.33910536183 |
| NM_004941    | DHX8    | 722  | 789  | 4.75012526094 |
| NM_004941    | DHX8    | 2289 | 2353 | 4.75012526094 |
| NM_004941    | DHX8    | 2853 | 2946 | 5.75414286111 |
| NM_004941    | DHX8    | 1307 | 1404 | 6.33910536183 |
| NM_004941    | DHX8    | 2412 | 2481 | 6.75414285356 |
| NM_004941    | DHX8    | 131  | 241  | 6.75414285356 |
| NM_004941    | DHX8    | 453  | 509  | 4.75012526094 |
| NM_001013255 | LSP1    | 786  | 894  | 8.7323854857  |
| NM_178582    | HM13    | 551  | 586  | 7.20427239737 |
| NM_178582    | HM13    | 626  | 688  | 7.20828326649 |
| NM_178582    | HM13    | 54   | 165  | 10.5302180924 |
| NM_178582    | HM13    | 277  | 504  | 12.0662709927 |
| NM_006540    | NCOA2   | 4768 | 4840 | 6.23325425353 |
| NM_006540    | NCOA2   | 1220 | 1289 | 7.22923688928 |
| NM_006540    | NCOA2   | 3371 | 3459 | 7.22923688928 |
| NM_006540    | NCOA2   | 1862 | 1945 | 7.2332477584  |
| NM_006540    | NCOA2   | 346  | 430  | 7.81821025912 |
| NM_006540    | NCOA2   | 94   | 176  | 7.2332544819  |
| NM_006013    | RPL10   | 578  | 651  | 4.60951730832 |
| NM_006013    | RPL10   | 531  | 574  | 2.80198863594 |
| NM_006013    | RPL10   | 687  | 891  | 6.44601857603 |
| NM_006013    | RPL10   | 150  | 526  | 7.70905298187 |
| NM_006010    | MANF    | 841  | 889  | 2.95312109327 |
| NM_006010    | MANF    | 306  | 355  | 4.03726030266 |
| NM_006010    | MANF    | 552  | 595  | 4.03708655234 |
| NM_006010    | MANF    | 633  | 685  | 4.03726030243 |
| NM_006010    | MANF    | 390  | 547  | 5.62222280338 |
| NM_006544    | EXOC5   | 401  | 470  | 5.34074658262 |
| NM_006544    | EXOC5   | 2301 | 2383 | 4.34074008748 |
| NM_006544    | EXOC5   | 2193 | 2252 | 6.66267490588 |
| NM_006544    | EXOC5   | 1827 | 1936 | 7.1481017406  |
| NM_006544    | EXOC5   | 1589 | 1722 | 6.66267491343 |
| NM_006017    | PROM1   | 3114 | 3223 | 9.70299170071 |
| NM_006017    | PROM1   | 2163 | 2233 | 9.24356008207 |
| NM_006017    | PROM1   | 2056 | 2157 | 10.3310229233 |
| NM_006017    | PROM1   | 3020 | 3112 | 10.1504506777 |
| NM_006017    | PROM1   | 2794 | 3012 | 11.1504506777 |
| NM_006017    | PROM1   | 3271 | 3386 | 10.4134850835 |
| NM_006017    | PROM1   | 3795 | 3976 | 9.56548817696 |
| NM_006017    | PROM1   | 2240 | 2764 | 13.1860745874 |
| NM_006017    | PROM1   | 481  | 1059 | 12.719293513  |
| NM_006017    | PROM1   | 1060 | 2052 | 13.719293513  |
| NM_006017    | PROM1   | 2    | 479  | 12.2659278951 |
| NM_006017    | PROM1   | 3452 | 3759 | 10.565488177  |
| NM_006546    | IGF2BP1 | 6470 | 6537 | 6.02676805322 |
| NM_006546    | IGF2BP1 | 5479 | 5526 | 4.62070074895 |
| NM_006546    | IGF2BP1 | 512  | 558  | 4.70483995078 |
| NM_006546    | IGF2BP1 | 3268 | 3319 | 3.70483322728 |

|           |         |      |      |               |
|-----------|---------|------|------|---------------|
| NM_006546 | IGF2BP1 | 5609 | 5667 | 5.2898024515  |
| NM_006546 | IGF2BP1 | 6861 | 6888 | 3.70082235816 |
| NM_006546 | IGF2BP1 | 1403 | 1462 | 5.28980245905 |
| NM_006546 | IGF2BP1 | 1759 | 1815 | 3.70483972241 |
| NM_006546 | IGF2BP1 | 5535 | 5594 | 4.62070074895 |
| NM_006546 | IGF2BP1 | 8553 | 8590 | 4.70483995078 |
| NM_006546 | IGF2BP1 | 287  | 348  | 3.70483322728 |
| NM_006546 | IGF2BP1 | 4996 | 5020 | 3.62070074895 |
| NM_006546 | IGF2BP1 | 8465 | 8549 | 3.70483995811 |
| NM_006546 | IGF2BP1 | 118  | 168  | 4.70082235816 |
| NM_006546 | IGF2BP1 | 1187 | 1309 | 5.28980245905 |
| NM_006546 | IGF2BP1 | 2606 | 2704 | 3.70483995833 |
| NM_006546 | IGF2BP1 | 5057 | 5105 | 5.28578485888 |
| NM_006546 | IGF2BP1 | 608  | 691  | 5.70483995833 |
| NM_006546 | IGF2BP1 | 6973 | 7075 | 3.70483995833 |
| NM_006546 | IGF2BP1 | 1651 | 1757 | 5.70483995833 |
| NM_006546 | IGF2BP1 | 2113 | 2193 | 3.70483322728 |
| NM_006546 | IGF2BP1 | 350  | 496  | 4.70483995833 |
| NM_006546 | IGF2BP1 | 1072 | 1184 | 6.02676805322 |
| NM_006546 | IGF2BP1 | 1847 | 2013 | 5.70483995833 |
| NM_006547 | IGF2BP3 | 1097 | 1161 | 6.57693196598 |
| NM_006547 | IGF2BP3 | 238  | 362  | 6.16188773565 |
| NM_006547 | IGF2BP3 | 982  | 1062 | 6.1618944667  |
| NM_006547 | IGF2BP3 | 3    | 52   | 6.16188773565 |
| NM_006547 | IGF2BP3 | 3889 | 3955 | 5.57693196598 |
| NM_006547 | IGF2BP3 | 3338 | 3435 | 6.57693196598 |
| NM_006547 | IGF2BP3 | 1347 | 1396 | 5.57675821566 |
| NM_006547 | IGF2BP3 | 1465 | 1512 | 6.15787686653 |
| NM_006547 | IGF2BP3 | 3783 | 3862 | 4.57693196598 |
| NM_006547 | IGF2BP3 | 1168 | 1248 | 5.57692523493 |
| NM_006547 | IGF2BP3 | 3445 | 3501 | 5.4927927566  |
| NM_006547 | IGF2BP3 | 3613 | 3656 | 6.15787686653 |
| NM_006547 | IGF2BP3 | 645  | 714  | 4.57291436581 |
| NM_006547 | IGF2BP3 | 2497 | 2542 | 4.57675821566 |
| NM_006547 | IGF2BP3 | 2851 | 2945 | 6.1618944667  |
| NM_006547 | IGF2BP3 | 3275 | 3332 | 6.16189423078 |
| NM_006547 | IGF2BP3 | 2703 | 2742 | 4.4927927566  |
| NM_006547 | IGF2BP3 | 1953 | 2088 | 5.57693196598 |
| NM_006547 | IGF2BP3 | 442  | 549  | 5.57291436581 |
| NM_006548 | IGF2BP2 | 1756 | 1834 | 2.71772806366 |
| NM_006548 | IGF2BP2 | 2686 | 2735 | 1.71790157806 |
| NM_006548 | IGF2BP2 | 2820 | 2875 | 1.71772806366 |
| NM_006548 | IGF2BP2 | 3223 | 3273 | 2.71789508293 |
| NM_006548 | IGF2BP2 | 2186 | 2218 | 1.71388421381 |
| NM_006548 | IGF2BP2 | 904  | 978  | 2.71388421381 |
| NM_006548 | IGF2BP2 | 749  | 810  | 1.6337626046  |
| NM_003069 | SMARCA1 | 3087 | 3130 | 2.23942136945 |
| NM_003069 | SMARCA1 | 3507 | 3569 | 2.82840147012 |
| NM_003069 | SMARCA1 | 3870 | 3946 | 2.82840147034 |
| NM_003069 | SMARCA1 | 78   | 132  | 1.23942136945 |

|              |          |      |      |               |               |
|--------------|----------|------|------|---------------|---------------|
| NM_003069    | SMARCA1  | 2218 | 2270 | 2.24343896962 |               |
| NM_003069    | SMARCA1  | 3791 | 3858 | 3.24343896962 |               |
| NM_003069    | SMARCA1  | 3631 | 3664 | 2.74426226096 |               |
| NM_003069    | SMARCA1  | 862  | 906  | 3.82839473929 |               |
| NM_003069    | SMARCA1  | 2628 | 2729 | 2.82840147034 |               |
| NM_003069    | SMARCA1  | 3665 | 3709 | 2.82438387017 |               |
| NM_003069    | SMARCA1  | 2335 | 2398 | 2.82840147034 |               |
| NM_003069    | SMARCA1  | 3137 | 3263 | 3.56536706451 |               |
| NM_003069    | SMARCA1  | 3729 | 3773 | 1.24343223857 |               |
| NM_003069    | SMARCA1  | 745  | 842  | 3.24343896962 |               |
| NM_003069    | SMARCA1  | 2813 | 2949 | 3.82840147034 |               |
| NM_003069    | SMARCA1  | 676  | 726  | 3.24343896207 |               |
| NM_003069    | SMARCA1  | 1956 | 2122 | 4.41336397106 |               |
| NM_003069    | SMARCA1  | 2491 | 2619 | 3.24343896962 |               |
| NM_003069    | SMARCA1  | 1512 | 1756 | 5.76700092568 |               |
| NM_003069    | SMARCA1  | 1827 | 1950 | 4.41336397106 |               |
| NM_003069    | SMARCA1  | 1096 | 1257 | 5.56536706451 |               |
| NM_003069    | SMARCA1  | 2975 | 3078 | 2.82840147034 |               |
| NM_003069    | SMARCA1  | 353  | 528  | 3.56536706451 |               |
| NM_003069    | SMARCA1  | 1259 | 1512 | 5.76700092568 |               |
| NM_003069    | SMARCA1  | 913  | 1091 | 5.33090181087 |               |
| NM_006018    | HCAR3    | 155  | 235  | 11.0826036485 |               |
| NM_006018    | HCAR3    | 340  | 424  | 10.3456380544 |               |
| NM_006018    | HCAR3    | 918  | 998  | 9.76067555364 |               |
| NM_006019    | TCIRG1   | 966  | 1010 | 9.13174536763 |               |
| NM_006019    | TCIRG1   | 265  | 320  | 9.72072546098 |               |
| NM_006019    | TCIRG1   | 2357 | 2399 | 9.13576296026 |               |
| NM_006019    | TCIRG1   | 769  | 865  | 9.13576296781 |               |
| NM_006019    | TCIRG1   | 2638 | 2673 | 8.13174536763 |               |
| NM_006019    | TCIRG1   | 1296 | 1367 | 10.4576910627 |               |
| NM_006019    | TCIRG1   | 2464 | 2592 | 10.7207254685 |               |
| NM_006019    | TCIRG1   | 2280 | 2357 | 8.13576296781 |               |
| NM_006019    | TCIRG1   | 183  | 263  | 9.72072546853 |               |
| NM_006019    | TCIRG1   | 1081 | 1140 | 8.05162375842 |               |
| NM_006019    | TCIRG1   | 1673 | 1815 | 10.9431178899 |               |
| NM_006019    | TCIRG1   | 2144 | 2263 | 10.4576910627 |               |
| NM_006019    | TCIRG1   | 1824 | 2002 | 11.9431178899 |               |
| NM_006019    | TCIRG1   | 1376 | 1597 | 12.0426535634 |               |
| NM_001127230 | AURKAIP1 |      | 127  | 170           | 4.31934603415 |
| NM_001127230 | AURKAIP1 |      | 170  | 307           | 3.73455728374 |
| NM_001127230 | AURKAIP1 |      | 347  | 443           | 3.73455728374 |
| NM_001127230 | AURKAIP1 |      | 521  | 675           | 4.31951978446 |
| NM_001171135 | ZBED1    | 3857 | 3912 | 8.23091719614 |               |
| NM_001206665 | IGSF8    | 780  | 868  | 6.84358823116 |               |
| NM_001206665 | IGSF8    | 1371 | 1439 | 6.84358823116 |               |
| NM_001206665 | IGSF8    | 1668 | 1707 | 6.75944902178 |               |
| NM_001206665 | IGSF8    | 1785 | 1832 | 5.75944902178 |               |
| NM_001206665 | IGSF8    | 687  | 780  | 8.16551632605 |               |
| NM_001206665 | IGSF8    | 1893 | 2024 | 8.42855073188 |               |
| NM_001206665 | IGSF8    | 217  | 272  | 7.42855073188 |               |

|              |                 |      |      |               |
|--------------|-----------------|------|------|---------------|
| NM_001206665 | IGSF8           | 106  | 212  | 7.84358823116 |
| NM_001128914 | PCBP2           | 1251 | 1315 | 3.51530431198 |
| NM_001128914 | PCBP2           | 1317 | 1411 | 4.38977342989 |
| NM_001128914 | PCBP2           | 812  | 876  | 1.93034181126 |
| NM_001128914 | PCBP2           | 1534 | 1707 | 4.93034181126 |
| NM_001128914 | PCBP2           | 245  | 466  | 5.1002668127  |
| NM_001128914 | PCBP2           | 467  | 809  | 5.1782693247  |
| NM_001128914 | PCBP2           | 1432 | 1516 | 4.1002668127  |
| NM_001128914 | PCBP2           | 883  | 1250 | 6.1002668127  |
| NM_001171132 | FAM3A           | 607  | 688  | 6.12583941972 |
| NM_001171132 | FAM3A           | 91   | 153  | 6.04170021033 |
| NM_001128919 | MARK3           | 2772 | 2832 | 4.78721701508 |
| NM_001128919 | MARK3           | 606  | 651  | 4.78704999581 |
| NM_001128919 | MARK3           | 740  | 817  | 5.78320614596 |
| NM_020690    | ANKHD1-EIF4EBP3 | 4342 | 4384 | 5.46480827209 |
| NM_020690    | ANKHD1-EIF4EBP3 | 1883 | 1952 | 5.46881914121 |
| NM_020690    | ANKHD1-EIF4EBP3 | 7024 | 7083 | 6.46882587226 |
| NM_020690    | ANKHD1-EIF4EBP3 | 1067 | 1148 | 7.46882586471 |
| NM_020690    | ANKHD1-EIF4EBP3 | 6416 | 6509 | 7.05378837298 |
| NM_020690    | ANKHD1-EIF4EBP3 | 2192 | 2273 | 6.46882587226 |
| NM_020690    | ANKHD1-EIF4EBP3 | 793  | 891  | 6.46881914121 |
| NM_020690    | ANKHD1-EIF4EBP3 | 2441 | 2536 | 5.46881914121 |
| NM_020690    | ANKHD1-EIF4EBP3 | 6914 | 6955 | 5.46865212195 |
| NM_020690    | ANKHD1-EIF4EBP3 | 3471 | 3538 | 5.46480827209 |
| NM_020690    | ANKHD1-EIF4EBP3 | 7325 | 7379 | 6.46480827209 |
| NM_020690    | ANKHD1-EIF4EBP3 | 7482 | 7517 | 5.46480827209 |
| NM_020690    | ANKHD1-EIF4EBP3 | 3111 | 3160 | 7.05378813707 |
| NM_020690    | ANKHD1-EIF4EBP3 | 2983 | 3050 | 5.46881914121 |
| NM_020690    | ANKHD1-EIF4EBP3 | 3594 | 3689 | 5.46882586471 |
| NM_020690    | ANKHD1-EIF4EBP3 | 3694 | 3769 | 6.46882563634 |
| NM_020690    | ANKHD1-EIF4EBP3 | 3317 | 3409 | 7.79075396714 |
| NM_020690    | ANKHD1-EIF4EBP3 | 7620 | 7673 | 5.38468666288 |
| NM_020690    | ANKHD1-EIF4EBP3 | 1191 | 1284 | 6.46882587226 |
| NM_020690    | ANKHD1-EIF4EBP3 | 532  | 603  | 7.05378836544 |
| NM_020690    | ANKHD1-EIF4EBP3 | 1579 | 1724 | 6.46882587226 |
| NM_020690    | ANKHD1-EIF4EBP3 | 1380 | 1523 | 8.27618079432 |
| NM_020690    | ANKHD1-EIF4EBP3 | 6052 | 6189 | 5.46882587226 |
| NM_020690    | ANKHD1-EIF4EBP3 | 6770 | 6871 | 6.46882587226 |
| NM_001079812 | DIAPH1          | 4031 | 4098 | 5.82405794272 |
| NM_001079812 | DIAPH1          | 4622 | 4700 | 4.239095442   |
| NM_001079812 | DIAPH1          | 3907 | 3989 | 5.239095442   |
| NM_001079812 | DIAPH1          | 2361 | 2417 | 5.82405794272 |
| NM_001079812 | DIAPH1          | 274  | 314  | 4.23909543445 |
| NM_001079812 | DIAPH1          | 5063 | 5105 | 4.23909520608 |
| NM_001079812 | DIAPH1          | 3803 | 3856 | 6.56102353688 |
| NM_001079812 | DIAPH1          | 5336 | 5421 | 5.239095442   |
| NM_001079812 | DIAPH1          | 3655 | 3733 | 6.239095442   |
| NM_001079812 | DIAPH1          | 4189 | 4232 | 5.82405794272 |
| NM_001079812 | DIAPH1          | 2152 | 2222 | 4.23909544178 |
| NM_001079812 | DIAPH1          | 4285 | 4479 | 9.239095442   |

|              |         |      |      |               |
|--------------|---------|------|------|---------------|
| NM_001079812 | DIAPH1  | 4508 | 4570 | 4.23909543445 |
| NM_001079812 | DIAPH1  | 2829 | 2944 | 7.40902044344 |
| NM_001079812 | DIAPH1  | 4860 | 4902 | 4.23909543445 |
| NM_001079812 | DIAPH1  | 1402 | 1697 | 9.36837845894 |
| NM_001079812 | DIAPH1  | 1299 | 1396 | 6.239095442   |
| NM_001079812 | DIAPH1  | 2458 | 2825 | 9.52449766086 |
| NM_001079812 | DIAPH1  | 2006 | 2152 | 7.40902044344 |
| NM_001079812 | DIAPH1  | 2946 | 3195 | 7.82405794272 |
| NM_001079812 | DIAPH1  | 5445 | 5595 | 7.04645036406 |
| NM_001079812 | DIAPH1  | 1699 | 1938 | 8.88295163177 |
| NM_001079812 | DIAPH1  | 2234 | 2324 | 5.239095442   |
| NM_001079812 | DIAPH1  | 3374 | 3597 | 7.04645036406 |
| NM_001079812 | DIAPH1  | 378  | 524  | 7.69852706064 |
| NM_001079812 | DIAPH1  | 4709 | 4854 | 7.56102353689 |
| NM_001079812 | DIAPH1  | 526  | 1290 | 10.2163753655 |
| NM_001079812 | DIAPH1  | 3202 | 3369 | 8.04645036406 |
| NM_001079818 | ITGA6   | 2484 | 2524 | 3.68308966472 |
| NM_001079818 | ITGA6   | 3931 | 3973 | 3.68710053384 |
| NM_001079818 | ITGA6   | 3703 | 3773 | 3.6871072649  |
| NM_001079818 | ITGA6   | 3984 | 4043 | 6.49446218695 |
| NM_001079818 | ITGA6   | 815  | 911  | 5.6871072649  |
| NM_001079818 | ITGA6   | 268  | 305  | 3.68710702898 |
| NM_001079818 | ITGA6   | 2163 | 2239 | 3.68710725735 |
| NM_001079818 | ITGA6   | 3048 | 3171 | 7.27206976562 |
| NM_001079818 | ITGA6   | 3540 | 3594 | 5.6871072649  |
| NM_001079818 | ITGA6   | 2334 | 2385 | 5.2720695297  |
| NM_001079818 | ITGA6   | 1838 | 1871 | 3.68308966472 |
| NM_001079818 | ITGA6   | 4955 | 5028 | 5.27206975807 |
| NM_001079818 | ITGA6   | 2952 | 3041 | 6.27206976562 |
| NM_001079818 | ITGA6   | 1748 | 1817 | 4.68710702898 |
| NM_001079818 | ITGA6   | 967  | 1026 | 5.2720695297  |
| NM_001079818 | ITGA6   | 1997 | 2059 | 4.68710726489 |
| NM_001079818 | ITGA6   | 1382 | 1449 | 5.68710726489 |
| NM_001079818 | ITGA6   | 204  | 266  | 3.60296805551 |
| NM_001079818 | ITGA6   | 1216 | 1341 | 6.00903535978 |
| NM_001079818 | ITGA6   | 2590 | 2766 | 6.27206976562 |
| NM_001079818 | ITGA6   | 621  | 785  | 5.6871072649  |
| NM_001079818 | ITGA6   | 3189 | 3396 | 8.33096345467 |
| NM_001079818 | ITGA6   | 1478 | 1615 | 7.00903535978 |
| NM_032451    | SPIRE2  | 1874 | 1966 | 8.2964251074  |
| NM_032451    | SPIRE2  | 1640 | 1742 | 8.30044270757 |
| NM_152417    | TMEM68  | 1325 | 1395 | 7.8369457368  |
| NM_152417    | TMEM68  | 1070 | 1116 | 6.16784402692 |
| NM_152417    | TMEM68  | 236  | 396  | 8.83694573702 |
| NM_152417    | TMEM68  | 755  | 839  | 8.57391133119 |
| NM_001017390 | SULT1A4 | 956  | 1054 | 5.90092609521 |
| NM_001017390 | SULT1A4 | 779  | 848  | 5.31596359448 |
| NM_152419    | HGSNAT  | 2593 | 2682 | 7.74976350718 |
| NM_152419    | HGSNAT  | 579  | 629  | 8.74976373555 |
| NM_152419    | HGSNAT  | 4062 | 4118 | 8.74975701204 |

|           |          |       |       |                    |
|-----------|----------|-------|-------|--------------------|
| NM_152419 | HGSNAT   | 477   | 539   | 9.74976374309      |
| NM_152419 | HGSNAT   | 847   | 917   | 9.74976374309      |
| NM_152419 | HGSNAT   | 2036  | 2086  | 7.74976373555      |
| NM_152419 | HGSNAT   | 1858  | 1911  | 8.74574614292      |
| NM_152419 | HGSNAT   | 208   | 274   | 9.74976374309      |
| NM_152419 | HGSNAT   | 339   | 422   | 8.74574614292      |
| NM_152419 | HGSNAT   | 781   | 842   | 9.33070864364      |
| NM_152419 | HGSNAT   | 1524  | 1638  | 11.2091953617      |
| NM_152419 | HGSNAT   | 3466  | 3557  | 7.74976350718      |
| NM_024936 | ZCCHC4   | 2000  | 2077  | 8.29793585196      |
| NM_018188 | ATAD3A   | 1545  | 1592  | 7.91487272475      |
| NM_018188 | ATAD3A   | 2226  | 2313  | 6.33008397435      |
| NM_018188 | ATAD3A   | 945   | 1079  | 8.65201206924      |
| NM_018188 | ATAD3A   | 1801  | 1911  | 8.65201206924      |
| NM_018183 | SBN01    | 2229  | 2288  | 6.69178686193      |
| NM_018183 | SBN01    | 4267  | 4361  | 6.10665734194      |
| NM_018183 | SBN01    | 1002  | 1043  | 6.69178686193      |
| NM_018183 | SBN01    | 1504  | 1552  | 7.42875895123      |
| NM_018183 | SBN01    | 8593  | 8636  | 5.02269188288      |
| NM_018183 | SBN01    | 3317  | 3432  | 7.10665734194      |
| NM_018183 | SBN01    | 3221  | 3294  | 5.10683109226      |
| NM_018183 | SBN01    | 4717  | 4765  | 5.10281349209      |
| NM_018183 | SBN01    | 2881  | 2941  | 6.69179359276      |
| NM_018183 | SBN01    | 3787  | 3859  | 6.10281349209      |
| NM_018183 | SBN01    | 5224  | 5289  | 6.10683109204      |
| NM_018183 | SBN01    | 4161  | 4219  | 6.6076543836       |
| NM_018183 | SBN01    | 2630  | 2767  | 7.42875918715      |
| NM_018183 | SBN01    | 1244  | 1310  | 7.42875918715      |
| NM_018183 | SBN01    | 1873  | 1941  | 5.10682436121      |
| NM_018183 | SBN01    | 10485 | 10574 | 6.10683085634      |
| NM_018183 | SBN01    | 3898  | 3960  | 5.10665734194      |
| NM_018180 | DHX32    | 1912  | 2043  | 8.90214883159      |
| NM_018180 | DHX32    | 1292  | 1358  | 7.89813123141      |
| NM_018180 | DHX32    | 1855  | 1906  | 7.90214210053      |
| NM_018180 | DHX32    | 2643  | 2711  | 6.31701258055      |
| NM_018180 | DHX32    | 909   | 990   | 6.31718632332      |
| NM_018180 | DHX32    | 581   | 662   | 7.90214859567      |
| NM_018180 | DHX32    | 2364  | 2419  | 7.31316873069      |
| NM_018180 | DHX32    | 2516  | 2583  | 7.90214210053      |
| NM_018180 | DHX32    | 1047  | 1175  | 8.31718633087      |
| NM_018180 | DHX32    | 417   | 514   | 7.31718633087      |
| NM_018186 | C1orf112 |       | 2607  | 2716 10.1751661524 |
| NM_018186 | C1orf112 |       | 1701  | 1752 9.59002990134 |
| NM_018184 | ARL8B    | 1382  | 1434  | 6.06664806525      |
| NM_018184 | ARL8B    | 492   | 551   | 6.48169229558      |
| NM_018184 | ARL8B    | 1830  | 1895  | 7.0666547963       |
| NM_018184 | ARL8B    | 1320  | 1378  | 4.48169228803      |
| NM_018184 | ARL8B    | 1919  | 1968  | 4.48169229558      |
| NM_018184 | ARL8B    | 896   | 947   | 6.0666547963       |
| NM_018184 | ARL8B    | 814   | 871   | 7.28904721764      |



|              |       |      |      |               |
|--------------|-------|------|------|---------------|
| NM_018184    | ARL8B | 1993 | 2047 | 5.47767469541 |
| NM_018184    | ARL8B | 613  | 753  | 6.80362039047 |
| NM_018184    | ARL8B | 1555 | 1638 | 4.48169229558 |
| NM_018184    | ARL8B | 2524 | 2593 | 6.48169229557 |
| NM_018184    | ARL8B | 1484 | 1530 | 5.47767469541 |
| NM_018184    | ARL8B | 1010 | 1070 | 4.3975530862  |
| NM_018184    | ARL8B | 377  | 491  | 7.48169229558 |
| NM_018184    | ARL8B | 2438 | 2515 | 5.48169228803 |
| NM_018184    | ARL8B | 130  | 374  | 8.80362039047 |
| NM_018184    | ARL8B | 2320 | 2432 | 6.80362039047 |
| NM_001127641 | LAMB3 | 180  | 288  | 15.296179395  |
| NM_001127641 | LAMB3 | 965  | 1024 | 13.8811418957 |
| NM_001127641 | LAMB3 | 2239 | 2302 | 14.8811418957 |
| NM_001127641 | LAMB3 | 2750 | 2851 | 14.296179395  |
| NM_001127641 | LAMB3 | 2314 | 2375 | 12.296179395  |
| NM_001127641 | LAMB3 | 679  | 754  | 13.296179395  |
| NM_001127641 | LAMB3 | 1599 | 1654 | 13.2961793948 |
| NM_001127641 | LAMB3 | 2943 | 2971 | 13.2921617948 |
| NM_001127641 | LAMB3 | 2645 | 2696 | 13.8811418955 |
| NM_001127641 | LAMB3 | 3319 | 3405 | 13.8811418957 |
| NM_001127641 | LAMB3 | 555  | 625  | 14.6181074899 |
| NM_001127641 | LAMB3 | 3046 | 3171 | 13.8811418957 |
| NM_001127641 | LAMB3 | 2885 | 2937 | 13.8811418957 |
| NM_001127641 | LAMB3 | 1527 | 1599 | 12.296179395  |
| NM_001127641 | LAMB3 | 3425 | 3521 | 14.296179395  |
| NM_001127641 | LAMB3 | 1495 | 1524 | 13.2961791591 |
| NM_001127641 | LAMB3 | 3930 | 3975 | 12.2921617948 |
| NM_001127641 | LAMB3 | 2197 | 2222 | 12.2120401856 |
| NM_001127641 | LAMB3 | 508  | 551  | 13.8811418881 |
| NM_001127641 | LAMB3 | 2414 | 2521 | 14.6181074899 |
| NM_001127641 | LAMB3 | 1292 | 1454 | 15.296179395  |
| NM_001127641 | LAMB3 | 308  | 338  | 12.2120401856 |
| NM_001127641 | LAMB3 | 2116 | 2182 | 13.296179395  |
| NM_001127641 | LAMB3 | 1670 | 1751 | 14.6181074899 |
| NM_001127641 | LAMB3 | 1862 | 2036 | 15.103534317  |
| NM_001127641 | LAMB3 | 3536 | 3618 | 13.296179395  |
| NM_001127641 | LAMB3 | 3176 | 3281 | 14.6181074899 |
| NM_001127641 | LAMB3 | 79   | 176  | 14.296179395  |
| NM_001127641 | LAMB3 | 832  | 963  | 14.6181074899 |
| NM_001127641 | LAMB3 | 3735 | 3914 | 15.296179395  |
| NM_001127641 | LAMB3 | 1051 | 1290 | 15.6181074899 |
| NM_001127641 | LAMB3 | 349  | 493  | 15.103534317  |
| NM_001127649 | PEX26 | 2418 | 2471 | 10.8537434603 |
| NM_001127649 | PEX26 | 2606 | 2664 | 8.8498996104  |
| NM_001127649 | PEX26 | 3084 | 3158 | 8.85391720302 |
| NM_001127649 | PEX26 | 2014 | 2115 | 10.4388797113 |
| NM_001127649 | PEX26 | 3754 | 3839 | 11.4388797113 |
| NM_001127649 | PEX26 | 1041 | 1225 | 10.8539172106 |
| NM_001127649 | PEX26 | 849  | 895  | 9.8498996104  |
| NM_002626    | PFKL  | 715  | 772  | 2.98177083705 |

|           |       |      |      |               |
|-----------|-------|------|------|---------------|
| NM_002626 | PFKL  | 1588 | 1635 | 3.06189244626 |
| NM_002626 | PFKL  | 1879 | 2022 | 4.65087254715 |
| NM_002626 | PFKL  | 790  | 878  | 4.65087254715 |
| NM_002622 | PFDN1 | 888  | 950  | 2.93067039573 |
| NM_002622 | PFDN1 | 527  | 601  | 1.93067712678 |
| NM_013403 | STRN4 | 1844 | 1884 | 6.01773803504 |
| NM_013403 | STRN4 | 2916 | 2977 | 4.43277577023 |
| NM_013403 | STRN4 | 942  | 992  | 4.43277577023 |
| NM_013403 | STRN4 | 2535 | 2566 | 4.43276903918 |
| NM_013403 | STRN4 | 3003 | 3055 | 6.01773803504 |
| NM_013403 | STRN4 | 3061 | 3108 | 6.01773827073 |
| NM_013403 | STRN4 | 812  | 896  | 6.01773827095 |
| NM_013403 | STRN4 | 1254 | 1351 | 6.01773827095 |
| NM_013403 | STRN4 | 426  | 493  | 5.42875817006 |
| NM_013403 | STRN4 | 340  | 411  | 6.01773827095 |
| NM_013403 | STRN4 | 1353 | 1537 | 6.01773827095 |
| NM_013403 | STRN4 | 1033 | 1147 | 5.43277577023 |
| NM_013402 | FADS1 | 3972 | 4012 | 8.87077258617 |
| NM_013402 | FADS1 | 2831 | 2886 | 9.45975268707 |
| NM_013402 | FADS1 | 2621 | 2668 | 8.87461643603 |
| NM_013402 | FADS1 | 1871 | 1933 | 9.45975268707 |
| NM_013402 | FADS1 | 1553 | 1624 | 9.45975268707 |
| NM_013402 | FADS1 | 3486 | 3536 | 7.87461643603 |
| NM_013402 | FADS1 | 2502 | 2567 | 7.8747901788  |
| NM_013402 | FADS1 | 3605 | 3681 | 9.4557350869  |
| NM_013402 | FADS1 | 816  | 912  | 11.4597526871 |
| NM_013402 | FADS1 | 4017 | 4079 | 8.87479018634 |
| NM_013402 | FADS1 | 3261 | 3350 | 9.87479018635 |
| NM_013402 | FADS1 | 1747 | 1803 | 9.87478345529 |
| NM_013402 | FADS1 | 2405 | 2499 | 10.1967182812 |
| NM_013402 | FADS1 | 2952 | 3069 | 10.6821451084 |
| NM_013402 | FADS1 | 480  | 808  | 13.1967182812 |
| NM_013402 | FADS1 | 1289 | 1383 | 10.8747901863 |
| NM_013402 | FADS1 | 962  | 1141 | 11.0447151878 |
| NM_013402 | FADS1 | 1143 | 1288 | 11.8747901863 |
| NM_013402 | FADS1 | 2234 | 2363 | 9.87479018635 |
| NM_013402 | FADS1 | 1383 | 1487 | 10.6821451084 |
| NM_013402 | FADS1 | 299  | 433  | 8.87479018635 |
| NM_013402 | FADS1 | 4107 | 4215 | 9.45975268707 |
| NM_002629 | PGAM1 | 414  | 482  | 4.50810595482 |
| NM_002629 | PGAM1 | 1237 | 1364 | 5.64560947857 |
| NM_002629 | PGAM1 | 801  | 1052 | 6.77114036065 |
| NM_002629 | PGAM1 | 169  | 355  | 6.57849528271 |
| NM_002629 | PGAM1 | 1061 | 1228 | 6.27364070118 |
| NM_002629 | PGAM1 | 483  | 614  | 5.88661757807 |
| NM_002629 | PGAM1 | 1516 | 1689 | 6.09306845554 |
| NM_002629 | PGAM1 | 3    | 161  | 4.99353278199 |
| NM_002629 | PGAM1 | 614  | 774  | 6.27364070118 |
| NM_013404 | MSLN  | 587  | 689  | 11.5712610023 |
| NM_013404 | MSLN  | 1643 | 1696 | 9.98629177051 |

|              |       |       |       |               |
|--------------|-------|-------|-------|---------------|
| NM_013404    | MSLN  | 1499  | 1573  | 9.90215929218 |
| NM_013404    | MSLN  | 1195  | 1245  | 10.9861247512 |
| NM_013404    | MSLN  | 1705  | 1749  | 10.9822809014 |
| NM_013404    | MSLN  | 334   | 496   | 9.98629850156 |
| NM_013404    | MSLN  | 1924  | 1989  | 9.98629177051 |
| NM_001199868 | GLRX3 | 1225  | 1273  | 3.31900181128 |
| NM_001199868 | GLRX3 | 851   | 943   | 3.40314102067 |
| NM_001199868 | GLRX3 | 779   | 831   | 2.40313428961 |
| NM_001199868 | GLRX3 | 155   | 358   | 6.57306602211 |
| NM_001199868 | GLRX3 | 386   | 531   | 4.98810352139 |
| NM_001199868 | GLRX3 | 584   | 742   | 4.72506911555 |
| NM_001199868 | GLRX3 | 988   | 1121  | 4.40314102067 |
| NM_005932    | MIPEP | 422   | 504   | 8.67281138123 |
| NM_005932    | MIPEP | 1370  | 1437  | 7.66880051211 |
| NM_005933    | MLL   | 8718  | 8768  | 9.17276123272 |
| NM_005933    | MLL   | 3363  | 3413  | 7.17275450167 |
| NM_005933    | MLL   | 6780  | 6874  | 8.75772373344 |
| NM_005933    | MLL   | 5614  | 5671  | 9.49468932761 |
| NM_005933    | MLL   | 10483 | 10537 | 7.16874363255 |
| NM_005933    | MLL   | 5509  | 5547  | 7.16874363255 |
| NM_005933    | MLL   | 9417  | 9479  | 9.17276123272 |
| NM_005933    | MLL   | 14865 | 14926 | 8.75772349752 |
| NM_005933    | MLL   | 15497 | 15539 | 7.16874363255 |
| NM_005933    | MLL   | 6382  | 6431  | 7.1725874824  |
| NM_005933    | MLL   | 5279  | 5321  | 8.16874363255 |
| NM_005933    | MLL   | 4945  | 5004  | 8.75370613327 |
| NM_005933    | MLL   | 1360  | 1408  | 8.75772373344 |
| NM_005933    | MLL   | 9074  | 9121  | 7.17275450167 |
| NM_005933    | MLL   | 1428  | 1499  | 7.1727609968  |
| NM_005933    | MLL   | 9234  | 9296  | 8.16874363255 |
| NM_005933    | MLL   | 2303  | 2407  | 8.75772373344 |
| NM_005933    | MLL   | 13841 | 13989 | 8.17276123272 |
| NM_005933    | MLL   | 7425  | 7502  | 8.1727612325  |
| NM_005933    | MLL   | 4338  | 4433  | 8.75772373344 |
| NM_005933    | MLL   | 6438  | 6517  | 8.1727609968  |
| NM_005933    | MLL   | 8782  | 8827  | 7.08862202334 |
| NM_005933    | MLL   | 12000 | 12074 | 7.1727609968  |
| NM_005933    | MLL   | 8090  | 8121  | 7.1725874824  |
| NM_005933    | MLL   | 7019  | 7111  | 7.17276123272 |
| NM_005933    | MLL   | 12665 | 12750 | 7.17276123272 |
| NM_005933    | MLL   | 4713  | 4811  | 9.17276123272 |
| NM_005933    | MLL   | 9837  | 9914  | 8.75772373344 |
| NM_005933    | MLL   | 5556  | 5614  | 8.75771700239 |
| NM_005933    | MLL   | 6055  | 6165  | 9.75772373344 |
| NM_005933    | MLL   | 6706  | 6776  | 8.16874363255 |
| NM_005933    | MLL   | 5879  | 6046  | 7.17276123272 |
| NM_005933    | MLL   | 4217  | 4335  | 8.75772373344 |
| NM_005933    | MLL   | 6567  | 6649  | 8.17275450167 |
| NM_005933    | MLL   | 5722  | 5842  | 9.49468932761 |
| NM_005933    | MLL   | 4465  | 4531  | 7.16874363255 |

|           |         |       |       |               |
|-----------|---------|-------|-------|---------------|
| NM_005933 | MLL     | 16071 | 16249 | 9.75772373344 |
| NM_005933 | MLL     | 8458  | 8563  | 7.17276123272 |
| NM_005934 | MLLT1   | 4214  | 4265  | 8.30619400296 |
| NM_005934 | MLLT1   | 4167  | 4208  | 7.30602025265 |
| NM_005934 | MLLT1   | 3521  | 3596  | 9.30619400296 |
| NM_005934 | MLLT1   | 1283  | 1362  | 7.30619400296 |
| NM_005934 | MLLT1   | 3830  | 3862  | 7.22205479358 |
| NM_005934 | MLLT1   | 1636  | 1692  | 8.89098275337 |
| NM_005934 | MLLT1   | 2954  | 2998  | 8.30217640279 |
| NM_005934 | MLLT1   | 3655  | 3714  | 8.89115650368 |
| NM_005934 | MLLT1   | 4302  | 4426  | 9.89115650368 |
| NM_005934 | MLLT1   | 174   | 218   | 8.22205479358 |
| NM_005934 | MLLT1   | 2320  | 2427  | 10.7656256216 |
| NM_005934 | MLLT1   | 2474  | 2521  | 9.30619400296 |
| NM_005934 | MLLT1   | 3362  | 3444  | 9.30619400296 |
| NM_005934 | MLLT1   | 2679  | 2760  | 7.30619400296 |
| NM_005934 | MLLT1   | 2240  | 2319  | 7.30618727191 |
| NM_005934 | MLLT1   | 614   | 729   | 9.62812209785 |
| NM_005934 | MLLT1   | 3111  | 3216  | 8.30619400296 |
| NM_005934 | MLLT1   | 247   | 339   | 8.89115650368 |
| NM_005934 | MLLT1   | 431   | 563   | 9.62812209785 |
| NM_005934 | MLLT1   | 1700  | 1834  | 10.7656256216 |
| NM_005934 | MLLT1   | 3990  | 4089  | 9.30619400296 |
| NM_005934 | MLLT1   | 2771  | 2911  | 10.7656256216 |
| NM_005935 | AFF1    | 4689  | 4741  | 8.20203382664 |
| NM_005935 | AFF1    | 6903  | 6931  | 8.20587767649 |
| NM_005935 | AFF1    | 8725  | 8808  | 8.20203382664 |
| NM_005937 | MLLT6   | 162   | 200   | 5.23900191829 |
| NM_005937 | MLLT6   | 4757  | 4836  | 6.32314112767 |
| NM_005937 | MLLT6   | 1819  | 1880  | 7.32314112767 |
| NM_005937 | MLLT6   | 6583  | 6623  | 6.32296737735 |
| NM_005937 | MLLT6   | 3409  | 3491  | 6.32314112767 |
| NM_005937 | MLLT6   | 4074  | 4120  | 6.90810362084 |
| NM_005937 | MLLT6   | 2414  | 2477  | 6.32314112766 |
| NM_005937 | MLLT6   | 3594  | 3652  | 7.32314112767 |
| NM_005937 | MLLT6   | 6526  | 6582  | 6.32314112767 |
| NM_005937 | MLLT6   | 2263  | 2303  | 6.23900191829 |
| NM_005937 | MLLT6   | 452   | 511   | 6.23900191829 |
| NM_015462 | NOL11   | 2123  | 2177  | 6.27890420024 |
| NM_015462 | NOL11   | 35    | 101   | 4.69394169952 |
| NM_015462 | NOL11   | 2312  | 2399  | 3.69394169952 |
| NM_015462 | NOL11   | 1089  | 1156  | 3.69394169197 |
| NM_015462 | NOL11   | 2026  | 2104  | 6.01569604409 |
| NM_015462 | NOL11   | 1569  | 1611  | 5.6939414636  |
| NM_015462 | NOL11   | 837   | 889   | 4.69394169952 |
| NM_015462 | NOL11   | 1833  | 1957  | 6.69394169952 |
| NM_015462 | NOL11   | 433   | 513   | 3.69394169951 |
| NM_015462 | NOL11   | 572   | 803   | 7.94186921296 |
| NM_015462 | NOL11   | 1218  | 1373  | 5.69394169952 |
| NM_018981 | DNAJC10 | 2313  | 2410  | 4.43837077633 |

|           |         |      |      |               |
|-----------|---------|------|------|---------------|
| NM_018981 | DNAJC10 | 1255 | 1307 | 6.02315953429 |
| NM_018981 | DNAJC10 | 3976 | 4021 | 6.43837078388 |
| NM_018981 | DNAJC10 | 1410 | 1443 | 4.43837077633 |
| NM_018981 | DNAJC10 | 1678 | 1754 | 7.24572570594 |
| NM_018981 | DNAJC10 | 2158 | 2244 | 6.76029887877 |
| NM_018981 | DNAJC10 | 2797 | 2870 | 6.0233332846  |
| NM_018981 | DNAJC10 | 1308 | 1386 | 7.43837078388 |
| NM_018981 | DNAJC10 | 1772 | 1957 | 8.52583362513 |
| NM_018981 | DNAJC10 | 2420 | 2499 | 6.76029887877 |
| NM_018981 | DNAJC10 | 4862 | 4906 | 4.43435318371 |
| NM_018981 | DNAJC10 | 2246 | 2311 | 6.43837078388 |
| NM_018981 | DNAJC10 | 3416 | 3518 | 5.43837078388 |
| NM_018981 | DNAJC10 | 4554 | 4593 | 4.3542315745  |
| NM_018981 | DNAJC10 | 2657 | 2690 | 4.43819703356 |
| NM_018981 | DNAJC10 | 501  | 595  | 6.0233332846  |
| NM_018981 | DNAJC10 | 2720 | 2786 | 6.43837078388 |
| NM_018981 | DNAJC10 | 1964 | 2110 | 7.24572570594 |
| NM_018981 | DNAJC10 | 3177 | 3243 | 5.43837078388 |
| NM_018981 | DNAJC10 | 2952 | 3090 | 6.43837078388 |
| NM_018981 | DNAJC10 | 980  | 1228 | 8.43837078388 |
| NM_018981 | DNAJC10 | 4256 | 4324 | 4.43435318371 |
| NM_018981 | DNAJC10 | 3770 | 3871 | 4.43836405283 |
| NM_018981 | DNAJC10 | 1444 | 1559 | 7.43837078388 |
| NM_018981 | DNAJC10 | 3316 | 3408 | 6.76029887877 |
| NM_018981 | DNAJC10 | 4102 | 4190 | 4.43837078388 |
| NM_018986 | SH3TC1  | 3705 | 3738 | 7.98915545234 |
| NM_018986 | SH3TC1  | 510  | 560  | 7.9929993022  |
| NM_015465 | GEMIN5  | 2958 | 3033 | 8.14641716422 |
| NM_015465 | GEMIN5  | 2379 | 2432 | 6.47748920443 |
| NM_015465 | GEMIN5  | 3135 | 3182 | 7.5614546635  |
| NM_015465 | GEMIN5  | 1231 | 1288 | 6.56162168276 |
| NM_018984 | SSH1    | 3796 | 3844 | 8.34606698869 |
| NM_018984 | SSH1    | 1028 | 1080 | 9.93102948941 |
| NM_018989 | RBM27   | 1641 | 1723 | 6.15511293558 |
| NM_018989 | RBM27   | 3345 | 3416 | 7.15511293558 |
| NM_013341 | OLA1    | 764  | 820  | 4.34035060018 |
| NM_013341 | OLA1    | 1578 | 1689 | 2.34436820035 |
| NM_013341 | OLA1    | 306  | 369  | 2.34436820013 |
| NM_013341 | OLA1    | 1134 | 1175 | 2.26022899097 |
| NM_013341 | OLA1    | 223  | 294  | 4.66629629524 |
| NM_013341 | OLA1    | 1197 | 1270 | 2.34035060018 |
| NM_002168 | IDH2    | 1275 | 1342 | 6.60097929686 |
| NM_002168 | IDH2    | 1536 | 1588 | 5.2750336018  |
| NM_002168 | IDH2    | 768  | 828  | 4.19491199259 |
| NM_002168 | IDH2    | 287  | 373  | 6.60097929686 |
| NM_002168 | IDH2    | 879  | 1027 | 7.86401370269 |
| NM_002168 | IDH2    | 114  | 204  | 5.27905120197 |
| NM_002168 | IDH2    | 384  | 657  | 8.44897620341 |
| NM_002168 | IDH2    | 1032 | 1225 | 8.08640612403 |
| NM_002168 | IDH2    | 1352 | 1531 | 7.73848282061 |

|           |          |      |      |                    |
|-----------|----------|------|------|--------------------|
| NM_019589 | YLPM1    | 5676 | 5730 | 5.50788766391      |
| NM_019589 | YLPM1    | 4277 | 4343 | 6.50789439496      |
| NM_019589 | YLPM1    | 6472 | 6531 | 6.42375518558      |
| NM_019589 | YLPM1    | 2257 | 2309 | 6.5038767948       |
| NM_019589 | YLPM1    | 4786 | 4925 | 7.09285689569      |
| NM_019589 | YLPM1    | 3932 | 4075 | 7.09285689569      |
| NM_019589 | YLPM1    | 6101 | 6176 | 7.08883929552      |
| NM_019589 | YLPM1    | 6852 | 6977 | 7.09285689569      |
| NM_019589 | YLPM1    | 4487 | 4588 | 7.09285689569      |
| NM_019589 | YLPM1    | 5094 | 5219 | 5.50789439497      |
| NM_019589 | YLPM1    | 3766 | 3862 | 5.50789439497      |
| NM_019589 | YLPM1    | 231  | 301  | 6.5038767948       |
| NM_019589 | YLPM1    | 5611 | 5674 | 5.5038767948       |
| NM_021969 | NR0B2    | 584  | 666  | 7.4852996162       |
| NM_021969 | NR0B2    | 864  | 915  | 7.40133415714      |
| NM_021969 | NR0B2    | 1017 | 1102 | 8.48547335897      |
| NM_052935 | NT5C3L   | 538  | 600  | 6.16537530172      |
| NM_052935 | NT5C3L   | 331  | 379  | 4.08525369251      |
| NM_052935 | NT5C3L   | 170  | 229  | 5.75434867156      |
| NM_052935 | NT5C3L   | 897  | 932  | 5.16921915157      |
| NM_052936 | ATG4A    | 1331 | 1419 | 12.6465318898      |
| NM_052936 | ATG4A    | 969  | 1034 | 11.9095662956      |
| NM_052932 | TMEM123  | 1405 | 1473 | 1.27005907849      |
| NM_052932 | TMEM123  | 1328 | 1397 | 2.27005907871      |
| NM_052932 | TMEM123  | 1183 | 1246 | 2.27005907871      |
| NM_052932 | TMEM123  | 2449 | 2500 | 0.269885328396     |
| NM_052932 | TMEM123  | 402  | 497  | 2.5919871736       |
| NM_052932 | TMEM123  | 2356 | 2397 | 0.269885328396     |
| NM_052932 | TMEM123  | 512  | 726  | 4.5919871736       |
| NM_052932 | TMEM123  | 1704 | 1774 | 2.5919871736       |
| NM_052932 | TMEM123  | 2144 | 2194 | 1.85501484838      |
| NM_052932 | TMEM123  | 2611 | 2715 | 3.07741400077      |
| NM_052932 | TMEM123  | 776  | 1099 | 5.55546129758      |
| NM_052932 | TMEM123  | 1516 | 1617 | 2.5919871736       |
| NM_052932 | TMEM123  | 2938 | 3079 | 3.27005907871      |
| NM_052932 | TMEM123  | 1826 | 2136 | 4.27005907871      |
| NM_052932 | TMEM123  | 3082 | 3285 | 4.51798659216      |
| NM_052932 | TMEM123  | 2736 | 2918 | 3.5919871736       |
| NM_016481 | C9orf156 |      | 1422 | 1534 7.49492509874 |
| NM_021961 | TEAD1    | 5411 | 5495 | 7.49771771928      |
| NM_021961 | TEAD1    | 9099 | 9149 | 7.08268022023      |
| NM_021961 | TEAD1    | 6907 | 6969 | 5.49370011933      |
| NM_021961 | TEAD1    | 5205 | 5257 | 5.49771098845      |
| NM_021961 | TEAD1    | 1809 | 1860 | 5.49370011933      |
| NM_021961 | TEAD1    | 4962 | 5003 | 5.41357851012      |
| NM_021961 | TEAD1    | 8722 | 8836 | 5.49771771951      |
| NM_021960 | MCL1     | 1497 | 1584 | 4.90270963627      |
| NM_021960 | MCL1     | 2304 | 2335 | 3.31372953537      |
| NM_021960 | MCL1     | 2022 | 2096 | 4.90270962872      |
| NM_021960 | MCL1     | 3799 | 3884 | 4.90270963627      |

|              |          |       |       |                   |
|--------------|----------|-------|-------|-------------------|
| NM_021960    | MCL1     | 1684  | 1763  | 5.63967523043     |
| NM_021960    | MCL1     | 2118  | 2182  | 4.31774713555     |
| NM_021960    | MCL1     | 204   | 258   | 3.31774713554     |
| NM_021960    | MCL1     | 1799  | 1849  | 3.31774040449     |
| NM_021960    | MCL1     | 2342  | 2377  | 4.23360792616     |
| NM_021960    | MCL1     | 1077  | 1297  | 6.90270963627     |
| NM_021960    | MCL1     | 2447  | 2542  | 4.90270963627     |
| NM_021960    | MCL1     | 1857  | 1940  | 4.90270962872     |
| NM_021960    | MCL1     | 2755  | 2914  | 7.1251020576      |
| NM_021960    | MCL1     | 3903  | 4071  | 4.90270963627     |
| NM_021960    | MCL1     | 3295  | 3423  | 5.90270963627     |
| NM_021960    | MCL1     | 965   | 1076  | 5.90270963627     |
| NM_021960    | MCL1     | 3606  | 3745  | 4.90270963627     |
| NM_021960    | MCL1     | 614   | 691   | 3.31774713555     |
| NM_021960    | MCL1     | 829   | 920   | 4.90270963604     |
| NM_021960    | MCL1     | 2941  | 3109  | 6.48767213699     |
| NM_021960    | MCL1     | 3430  | 3536  | 5.63967523043     |
| NM_021964    | ZNF148   | 485   | 540   | 8.52138592164     |
| NM_021964    | ZNF148   | 2654  | 2690  | 7.52138592164     |
| NM_021964    | ZNF148   | 2452  | 2539  | 8.60150753085     |
| NM_018366    | CNO      | 343   | 412   | 6.38545211177     |
| NM_018366    | CNO      | 1072  | 1175  | 7.38545211932     |
| NM_001697    | ATP50    | 248   | 288   | 4.23588973176     |
| NM_001697    | ATP50    | 305   | 342   | 5.23588973176     |
| NM_001697    | ATP50    | 403   | 484   | 6.15576812255     |
| NM_001697    | ATP50    | 507   | 738   | 8.04726225399     |
| NM_001697    | ATP50    | 158   | 234   | 5.82486983243     |
| NM_001170795 | C2orf28  | 147   | 779   | 9.94912483238     |
| NM_033416    | IMP4     | 881   | 953   | 6.58095958572     |
| NM_033416    | IMP4     | 311   | 353   | 5.17489228145     |
| NM_033416    | IMP4     | 436   | 478   | 4.17489228145     |
| NM_033416    | IMP4     | 818   | 853   | 4.17489228145     |
| NM_033416    | IMP4     | 209   | 262   | 5.84399399133     |
| NM_033416    | IMP4     | 719   | 808   | 6.25903148328     |
| NM_033416    | IMP4     | 550   | 646   | 6.84399399155     |
| NM_033414    | ZNF622   | 1387  | 1454  | 5.62349305577     |
| NM_033414    | ZNF622   | 1204  | 1302  | 4.03853055505     |
| NM_033414    | ZNF622   | 828   | 935   | 5.62349306331     |
| NM_033414    | ZNF622   | 444   | 510   | 5.62349306332     |
| NM_033414    | ZNF622   | 716   | 823   | 6.0385305626      |
| NM_033419    | PGAP3    | 1101  | 1152  | 10.6885671171     |
| NM_033419    | PGAP3    | 846   | 894   | 9.68839336679     |
| NM_018948    | ERRFI1   | 402   | 454   | 2.23972177167     |
| NM_014849    | SV2A     | 2750  | 2861  | 10.437556718      |
| NM_171982    | TRIM35   | 1696  | 1733  | 9.31102995108     |
| NM_171982    | TRIM35   | 2784  | 2896  | 10.3110299586     |
| NM_014846    | KIAA0196 |       | 837   | 903 7.55200238624 |
| NM_148894    | BOD1L    | 835   | 889   | 4.88794101536     |
| NM_148894    | BOD1L    | 10040 | 10111 | 5.97208022452     |
| NM_148894    | BOD1L    | 1371  | 1452  | 4.97208021719     |

|           |         |      |      |               |
|-----------|---------|------|------|---------------|
| NM_148894 | BOD1L   | 4056 | 4098 | 5.88794101536 |
| NM_022051 | EGLN1   | 4393 | 4461 | 7.22285787828 |
| NM_022051 | EGLN1   | 4919 | 4983 | 6.22268412796 |
| NM_022051 | EGLN1   | 5578 | 5650 | 5.63387777738 |
| NM_022051 | EGLN1   | 4668 | 4775 | 6.95982347244 |
| NM_022051 | EGLN1   | 4593 | 4640 | 4.55375616817 |
| NM_022051 | EGLN1   | 3724 | 3831 | 5.63789537755 |
| NM_022051 | EGLN1   | 3960 | 4020 | 6.95982347244 |
| NM_022051 | EGLN1   | 4065 | 4282 | 8.44525029961 |
| NM_022051 | EGLN1   | 3198 | 3333 | 6.22285787828 |
| NM_080546 | SLC44A1 | 412  | 468  | 5.45619031903 |
| NM_080546 | SLC44A1 | 8557 | 8600 | 4.45619031903 |
| NM_080546 | SLC44A1 | 890  | 925  | 7.26353851004 |
| NM_080546 | SLC44A1 | 4465 | 4528 | 6.03713521958 |
| NM_080546 | SLC44A1 | 1158 | 1220 | 4.45601656872 |
| NM_080546 | SLC44A1 | 1577 | 1628 | 4.37205110965 |
| NM_080546 | SLC44A1 | 758  | 838  | 7.04115281976 |
| NM_080546 | SLC44A1 | 1758 | 1843 | 6.04115281953 |
| NM_080546 | SLC44A1 | 1235 | 1444 | 8.77811841392 |
| NM_080546 | SLC44A1 | 5558 | 5578 | 4.45217271886 |
| NM_080546 | SLC44A1 | 961  | 1103 | 7.91562193767 |
| NM_080546 | SLC44A1 | 4323 | 4411 | 6.03713521958 |
| NM_080546 | SLC44A1 | 1879 | 2019 | 7.91562193767 |
| NM_080546 | SLC44A1 | 2146 | 2254 | 5.45619008312 |
| NM_080546 | SLC44A1 | 512  | 754  | 7.62611532048 |
| NM_080546 | SLC44A1 | 248  | 404  | 6.04115281976 |
| NM_080546 | SLC44A1 | 2020 | 2146 | 8.15663003718 |
| NM_024782 | NHEJ1   | 461  | 502  | 7.34751353462 |
| NM_024782 | NHEJ1   | 619  | 693  | 5.84668351223 |
| NM_012112 | TPX2    | 282  | 333  | 5.75608260212 |
| NM_012112 | TPX2    | 2800 | 2841 | 5.17112010162 |
| NM_012112 | TPX2    | 3604 | 3680 | 4.17112009407 |
| NM_012112 | TPX2    | 2667 | 2747 | 4.17112010162 |
| NM_012112 | TPX2    | 342  | 382  | 5.08698089224 |
| NM_012112 | TPX2    | 3537 | 3593 | 4.08698089224 |
| NM_012112 | TPX2    | 1305 | 1453 | 7.17112010162 |
| NM_012112 | TPX2    | 1458 | 2130 | 10.3208672211 |
| NM_012112 | TPX2    | 1210 | 1301 | 5.17112010162 |
| NM_012112 | TPX2    | 3360 | 3525 | 7.63055172026 |
| NM_012112 | TPX2    | 2844 | 3333 | 10.3609446605 |
| NM_012112 | TPX2    | 2133 | 2666 | 9.78582994574 |
| NM_012112 | TPX2    | 417  | 1189 | 10.6789147418 |
| NM_012112 | TPX2    | 204  | 279  | 6.49304819651 |
| NM_012110 | CHIC2   | 460  | 508  | 6.82887874824 |
| NM_012110 | CHIC2   | 1040 | 1115 | 7.41384797246 |
| NM_012110 | CHIC2   | 759  | 790  | 5.74474626991 |
| NM_199287 | CCDC137 | 1131 | 1179 | 7.96899000068 |
| NM_012116 | CBLC    | 1102 | 1175 | 9.87187824087 |
| NM_030980 | ISG20L2 | 252  | 308  | 9.31050881516 |
| NM_030980 | ISG20L2 | 922  | 955  | 7.64140710505 |



|           |         |      |      |               |
|-----------|---------|------|------|---------------|
| NM_030980 | ISG20L2 | 1373 | 1405 | 6.64140710505 |
| NM_012448 | STAT5B  | 1536 | 1618 | 5.93614488507 |
| NM_012448 | STAT5B  | 3514 | 3584 | 5.93631862784 |
| NM_012449 | STEAP1  | 357  | 420  | 5.18065112816 |
| NM_012449 | STEAP1  | 1189 | 1246 | 5.18065112816 |
| NM_012449 | STEAP1  | 600  | 751  | 8.76561362888 |
| NM_012449 | STEAP1  | 996  | 1037 | 7.18065112794 |
| NM_012449 | STEAP1  | 806  | 994  | 10.3099341451 |
| NM_012449 | STEAP1  | 1070 | 1189 | 8.50257922305 |
| NM_012449 | STEAP1  | 184  | 307  | 6.18065112816 |
| NM_012449 | STEAP1  | 428  | 508  | 7.18065112816 |
| NM_174936 | PCSK9   | 2739 | 2804 | 9.8831773278  |
| NM_174936 | PCSK9   | 420  | 495  | 8.46813982853 |
| NM_174936 | PCSK9   | 3506 | 3544 | 6.88317732026 |
| NM_174936 | PCSK9   | 3258 | 3310 | 7.8831773278  |
| NM_174936 | PCSK9   | 1700 | 1773 | 9.20510542269 |
| NM_174936 | PCSK9   | 3114 | 3163 | 7.8831773278  |
| NM_174936 | PCSK9   | 2673 | 2736 | 8.8831773278  |
| NM_174936 | PCSK9   | 1545 | 1656 | 10.2051054227 |
| NM_174936 | PCSK9   | 3190 | 3246 | 7.88317059675 |
| NM_174936 | PCSK9   | 3545 | 3690 | 11.0531023292 |
| NM_174936 | PCSK9   | 2463 | 2551 | 9.20510542269 |
| NM_174936 | PCSK9   | 3316 | 3448 | 10.0531023292 |
| NM_174936 | PCSK9   | 112  | 173  | 7.8831773278  |
| NM_174936 | PCSK9   | 2223 | 2362 | 7.8831773278  |
| NM_174936 | PCSK9   | 2562 | 2658 | 8.8831773278  |
| NM_174936 | PCSK9   | 1282 | 1354 | 7.8831773278  |
| NM_174936 | PCSK9   | 1139 | 1237 | 7.8831773278  |
| NM_174936 | PCSK9   | 226  | 358  | 9.20510542269 |
| NM_174936 | PCSK9   | 561  | 614  | 8.8831773278  |
| NM_174936 | PCSK9   | 698  | 883  | 11.1311048412 |
| NM_174936 | PCSK9   | 922  | 1025 | 6.8831773278  |
| NM_174936 | PCSK9   | 2817 | 2910 | 6.8831773278  |
| NM_174936 | PCSK9   | 2925 | 3089 | 9.20510542269 |
| NM_174936 | PCSK9   | 1385 | 1531 | 9.8831773278  |
| NM_001177 | ARL1    | 2152 | 2209 | 3.68287120972 |
| NM_001177 | ARL1    | 170  | 202  | 3.60274960051 |
| NM_001177 | ARL1    | 2902 | 2942 | 2.60274960051 |
| NM_201274 | MPRIP   | 1467 | 1517 | 5.91477164983 |
| NM_201274 | MPRIP   | 1543 | 1578 | 4.91476491878 |
| NM_201274 | MPRIP   | 273  | 324  | 5.91477164983 |
| NM_201274 | MPRIP   | 4007 | 4080 | 5.91075404967 |
| NM_201274 | MPRIP   | 1227 | 1327 | 7.23669974473 |
| NM_201274 | MPRIP   | 7780 | 7811 | 4.91075404967 |
| NM_201274 | MPRIP   | 491  | 533  | 5.91459789952 |
| NM_201274 | MPRIP   | 9525 | 9576 | 4.91459789952 |
| NM_201274 | MPRIP   | 1890 | 1955 | 5.91477164984 |
| NM_201274 | MPRIP   | 4997 | 5080 | 5.91477164984 |
| NM_201274 | MPRIP   | 3281 | 3498 | 8.49973415056 |
| NM_201274 | MPRIP   | 3807 | 3876 | 4.91459789952 |

|           |         |      |      |               |
|-----------|---------|------|------|---------------|
| NM_201274 | MPRIP   | 179  | 268  | 6.91477141392 |
| NM_201274 | MPRIP   | 3689 | 3771 | 6.91477164983 |
| NM_201274 | MPRIP   | 2649 | 2741 | 5.91477164984 |
| NM_201274 | MPRIP   | 2776 | 2912 | 6.49973415056 |
| NM_178001 | PPP2R4  | 2011 | 2085 | 6.89594008551 |
| NM_178001 | PPP2R4  | 1317 | 1382 | 6.89594007796 |
| NM_178001 | PPP2R4  | 320  | 372  | 5.89576633519 |
| NM_178001 | PPP2R4  | 1640 | 1710 | 7.89593335446 |
| NM_178001 | PPP2R4  | 2371 | 2407 | 5.89593335446 |
| NM_178001 | PPP2R4  | 1170 | 1203 | 6.89192248534 |
| NM_178001 | PPP2R4  | 619  | 716  | 7.89594008551 |
| NM_178001 | PPP2R4  | 1065 | 1167 | 6.89594008551 |
| NM_178001 | PPP2R4  | 114  | 212  | 7.48090258623 |
| NM_178001 | PPP2R4  | 400  | 481  | 6.89594007796 |
| NM_178001 | PPP2R4  | 1556 | 1626 | 5.89593984959 |
| NM_178001 | PPP2R4  | 1397 | 1494 | 7.48090258623 |
| NM_178001 | PPP2R4  | 858  | 914  | 6.89593984959 |
| NM_178001 | PPP2R4  | 2187 | 2319 | 7.89594008551 |
| NM_178001 | PPP2R4  | 243  | 299  | 5.89593335446 |
| NM_018011 | ARGLU1  | 907  | 996  | 3.04797782033 |
| NM_018011 | ARGLU1  | 1462 | 1674 | 4.63294032105 |
| NM_018011 | ARGLU1  | 1033 | 1455 | 6.50740943896 |
| NM_182552 | WDR27   | 1547 | 1637 | 9.80588220705 |
| NM_182552 | WDR27   | 628  | 683  | 9.39067095746 |
| NM_182557 | BCL9L   | 5586 | 5634 | 7.29347603855 |
| NM_182557 | BCL9L   | 2870 | 2912 | 7.28945867429 |
| NM_182557 | BCL9L   | 3697 | 3766 | 9.29347627446 |
| NM_182557 | BCL9L   | 5681 | 5740 | 8.29347603855 |
| NM_182557 | BCL9L   | 6014 | 6108 | 10.1008311965 |
| NM_182557 | BCL9L   | 5925 | 6000 | 9.61540436935 |
| NM_182557 | BCL9L   | 1406 | 1483 | 7.29347626692 |
| NM_182557 | BCL9L   | 4039 | 4075 | 8.28945867429 |
| NM_182557 | BCL9L   | 3275 | 3336 | 7.29347627446 |
| NM_018013 | SOBP    | 662  | 709  | 8.14354586667 |
| NM_018013 | SOBP    | 1206 | 1260 | 8.80862997661 |
| NM_173587 | RCOR2   | 892  | 914  | 7.41027124517 |
| NM_203459 | CAMSAP2 | 6708 | 6765 | 6.82792388574 |
| NM_203459 | CAMSAP2 | 1317 | 1376 | 6.83193475486 |
| NM_203459 | CAMSAP2 | 428  | 524  | 6.82792388574 |
| NM_018015 | CXorf57 | 2466 | 2525 | 10.3349892674 |
| NM_173589 | DNHD1   | 1486 | 1525 | 8.1233845874  |
| NM_004716 | PCSK7   | 3584 | 3630 | 7.8730558166  |
| NM_004716 | PCSK7   | 3365 | 3432 | 7.79293420739 |
| NM_004716 | PCSK7   | 1751 | 1802 | 8.87689966646 |
| NM_004716 | PCSK7   | 3729 | 3778 | 9.37789670811 |
| NM_004716 | PCSK7   | 2326 | 2374 | 7.87707318085 |
| NM_004716 | PCSK7   | 596  | 649  | 7.8730558166  |
| NM_004716 | PCSK7   | 2629 | 2677 | 7.79293420739 |
| NM_004716 | PCSK7   | 821  | 894  | 7.87706668572 |
| NM_004713 | NEMF    | 1046 | 1095 | 4.23124758835 |

|              |         |      |      |               |
|--------------|---------|------|------|---------------|
| NM_004712    | HGS     | 2618 | 2652 | 6.06829682284 |
| NM_004712    | HGS     | 1676 | 1713 | 5.56747329558 |
| NM_004712    | HGS     | 1241 | 1305 | 4.56746680045 |
| NM_004712    | HGS     | 1433 | 1477 | 6.88940139047 |
| NM_004712    | HGS     | 205  | 314  | 6.88940162639 |
| NM_004712    | HGS     | 2710 | 2795 | 6.15243603222 |
| NM_004712    | HGS     | 2454 | 2592 | 7.73739853295 |
| NM_004712    | HGS     | 735  | 809  | 4.56747353128 |
| NM_004712    | HGS     | 1042 | 1159 | 7.15243603222 |
| NM_004712    | HGS     | 383  | 489  | 5.5674735315  |
| NM_004712    | HGS     | 591  | 731  | 6.15243603222 |
| NM_004710    | SYNGR2  | 327  | 408  | 11.2077002922 |
| NM_004710    | SYNGR2  | 1064 | 1100 | 7.03776855972 |
| NM_004710    | SYNGR2  | 921  | 975  | 7.03776855972 |
| NM_004710    | SYNGR2  | 1323 | 1375 | 7.03760154045 |
| NM_004710    | SYNGR2  | 483  | 648  | 10.3597033857 |
| NM_004710    | SYNGR2  | 115  | 194  | 10.3597033857 |
| NM_004710    | SYNGR2  | 1411 | 1478 | 8.03777529077 |
| NM_004710    | SYNGR2  | 276  | 321  | 8.62273106044 |
| NM_004710    | SYNGR2  | 1106 | 1197 | 8.03776855972 |
| NM_004710    | SYNGR2  | 653  | 824  | 9.03777529077 |
| NM_001195200 | CCDC107 | 106  | 160  | 9.16173720758 |
| NM_015024    | XP07    | 445  | 495  | 7.41503315978 |
| NM_015024    | XP07    | 3036 | 3110 | 6.83007089497 |
| NM_015024    | XP07    | 2131 | 2186 | 6.7459316856  |
| NM_015024    | XP07    | 2641 | 2704 | 5.82605329481 |
| NM_015024    | XP07    | 4710 | 4764 | 7.41101579553 |
| NM_015024    | XP07    | 338  | 382  | 7.41503339548 |
| NM_015024    | XP07    | 4193 | 4239 | 6.82989714466 |
| NM_015024    | XP07    | 2786 | 2884 | 8.63742581704 |
| NM_015024    | XP07    | 844  | 938  | 6.83007089498 |
| NM_015024    | XP07    | 4388 | 4419 | 5.82605329481 |
| NM_015024    | XP07    | 1769 | 1873 | 7.83007089498 |
| NM_015024    | XP07    | 3826 | 3880 | 6.82605329481 |
| NM_015024    | XP07    | 1342 | 1484 | 8.4150333957  |
| NM_015024    | XP07    | 2362 | 2430 | 7.41485964538 |
| NM_015024    | XP07    | 2552 | 2639 | 6.83007088743 |
| NM_004719    | SCAF11  | 860  | 919  | 6.6244448695  |
| NM_004719    | SCAF11  | 3818 | 3863 | 4.6244448695  |
| NM_004719    | SCAF11  | 2552 | 2633 | 7.20940737022 |
| NM_004719    | SCAF11  | 460  | 518  | 4.6244448695  |
| NM_004719    | SCAF11  | 4918 | 4986 | 6.20941410127 |
| NM_004719    | SCAF11  | 4802 | 4885 | 4.62445160056 |
| NM_004719    | SCAF11  | 2036 | 2086 | 4.6244448695  |
| NM_004719    | SCAF11  | 3325 | 3358 | 5.6244448695  |
| NM_004719    | SCAF11  | 1929 | 2022 | 6.62445160056 |
| NM_004719    | SCAF11  | 256  | 408  | 6.62445160056 |
| NM_004719    | SCAF11  | 2455 | 2547 | 6.62445160033 |
| NM_004719    | SCAF11  | 148  | 198  | 4.62043400038 |
| NM_004719    | SCAF11  | 3068 | 3157 | 5.62043400038 |

|           |         |      |      |               |
|-----------|---------|------|------|---------------|
| NM_004719 | SCAF11  | 1715 | 1859 | 6.20941410128 |
| NM_004718 | COX7A2L | 616  | 663  | 5.98329605491 |
| NM_004718 | COX7A2L | 280  | 387  | 6.65239776501 |
| NM_000418 | IL4R    | 443  | 492  | 10.2455235142 |
| NM_000418 | IL4R    | 760  | 825  | 11.2456972645 |
| NM_000418 | IL4R    | 627  | 695  | 10.8306597652 |
| NM_000418 | IL4R    | 2691 | 2719 | 10.1615580551 |
| NM_000418 | IL4R    | 3139 | 3213 | 9.24569725697 |
| NM_004401 | DFFA    | 302  | 330  | 5.14846714698 |
| NM_000411 | HLCS    | 1552 | 1623 | 7.57600470377 |
| NM_000411 | HLCS    | 1031 | 1094 | 7.5719871036  |
| NM_000416 | IFNGR1  | 139  | 204  | 5.50055092214 |
| NM_000416 | IFNGR1  | 207  | 253  | 3.9154146711  |
| NM_000416 | IFNGR1  | 1468 | 1565 | 7.50055092214 |
| NM_000416 | IFNGR1  | 817  | 909  | 7.08551342286 |
| NM_000416 | IFNGR1  | 1871 | 1953 | 3.91558842142 |
| NM_000416 | IFNGR1  | 1343 | 1450 | 7.37502004006 |
| NM_000416 | IFNGR1  | 454  | 520  | 4.91558842142 |
| NM_000416 | IFNGR1  | 1101 | 1318 | 8.50055092214 |
| NM_000416 | IFNGR1  | 554  | 708  | 7.37502004006 |
| NM_000416 | IFNGR1  | 938  | 1076 | 7.37502004006 |
| NM_000416 | IFNGR1  | 260  | 443  | 8.00305126267 |
| NM_000416 | IFNGR1  | 1580 | 1768 | 8.55944461119 |
| NM_006845 | KIF2C   | 1452 | 1517 | 6.83411110682 |
| NM_006845 | KIF2C   | 1390 | 1444 | 5.24914859855 |
| NM_006845 | KIF2C   | 387  | 435  | 6.24897485578 |
| NM_006845 | KIF2C   | 2542 | 2647 | 7.16500939672 |
| NM_006845 | KIF2C   | 970  | 1083 | 8.05650352816 |
| NM_006845 | KIF2C   | 810  | 903  | 7.2491486061  |
| NM_006845 | KIF2C   | 2733 | 2782 | 6.24513100593 |
| NM_006845 | KIF2C   | 64   | 165  | 7.83411110682 |
| NM_006845 | KIF2C   | 1553 | 1686 | 6.83411110682 |
| NM_006845 | KIF2C   | 1261 | 1357 | 6.2491486061  |
| NM_006845 | KIF2C   | 685  | 809  | 7.57107670099 |
| NM_006845 | KIF2C   | 1689 | 1897 | 8.41907360754 |
| NM_006845 | KIF2C   | 2043 | 2177 | 6.2491486061  |
| NM_006845 | KIF2C   | 208  | 365  | 9.2491486061  |
| NM_006844 | ILVBL   | 511  | 576  | 8.25209856845 |
| NM_006844 | ILVBL   | 364  | 432  | 6.93017047356 |
| NM_006844 | ILVBL   | 873  | 919  | 6.93016374251 |
| NM_006844 | ILVBL   | 2002 | 2140 | 8.93017047356 |
| NM_006844 | ILVBL   | 2196 | 2311 | 8.51513297428 |
| NM_006844 | ILVBL   | 1450 | 1591 | 6.93017047356 |
| NM_006844 | ILVBL   | 1672 | 1868 | 9.3896020922  |
| NM_006844 | ILVBL   | 968  | 1138 | 8.73752539562 |
| NM_006844 | ILVBL   | 580  | 832  | 9.6306101917  |
| NM_006844 | ILVBL   | 1167 | 1364 | 9.100095475   |
| NM_006844 | ILVBL   | 201  | 294  | 6.93017047356 |
| NM_006841 | SLC38A3 | 1379 | 1431 | 5.24076240594 |
| NM_006841 | SLC38A3 | 898  | 951  | 6.90584651588 |

|              |          |      |      |               |               |
|--------------|----------|------|------|---------------|---------------|
| NM_006841    | SLC38A3  | 1479 | 1545 | 5.32472786501 |               |
| NM_006841    | SLC38A3  | 391  | 514  | 6.90986411605 |               |
| NM_006842    | SF3B2    | 277  | 368  | 4.81516647538 |               |
| NM_006842    | SF3B2    | 2577 | 2647 | 4.00781155332 |               |
| NM_006842    | SF3B2    | 2393 | 2453 | 3.00780482227 |               |
| NM_006842    | SF3B2    | 683  | 741  | 3.00781155331 |               |
| NM_006842    | SF3B2    | 2736 | 2862 | 4.59277405404 |               |
| NM_006842    | SF3B2    | 2453 | 2568 | 5.46724317196 |               |
| NM_006842    | SF3B2    | 497  | 639  | 4.59277405404 |               |
| NM_006842    | SF3B2    | 1381 | 1558 | 5.81516647538 |               |
| NM_006842    | SF3B2    | 763  | 838  | 4.32973964821 |               |
| NM_006842    | SF3B2    | 141  | 272  | 5.00781155332 |               |
| NM_006842    | SF3B2    | 1093 | 1371 | 6.32973964821 |               |
| NM_006842    | SF3B2    | 1558 | 1923 | 5.91470214893 |               |
| NM_006842    | SF3B2    | 851  | 1090 | 5.70825127146 |               |
| NM_006842    | SF3B2    | 1970 | 2391 | 6.96200786371 |               |
| NM_001040436 | YARS2    | 898  | 957  | 6.35643258168 |               |
| NM_001040436 | YARS2    | 767  | 893  | 7.94156883272 |               |
| NM_001040436 | YARS2    | 1132 | 1189 | 7.35659960094 |               |
| NM_001040436 | YARS2    | 1263 | 1302 | 8.35258873182 |               |
| NM_004578    | RAB4A    | 613  | 706  | 4.43300783951 |               |
| NM_004578    | RAB4A    | 1178 | 1236 | 5.75494266545 |               |
| NM_004578    | RAB4A    | 442  | 520  | 4.43301456301 |               |
| NM_004578    | RAB4A    | 981  | 1063 | 4.43301456301 |               |
| NM_001165969 | STRADA   | 376  | 461  | 7.79342061116 |               |
| NM_032595    | PPP1R9B  | 2791 | 2828 | 6.0624753166  |               |
| NM_004571    | PKNOX1   | 3989 | 4019 | 9.08671941498 |               |
| NM_004577    | PSPH     | 1403 | 1446 | 7.05735791436 |               |
| NM_004577    | PSPH     | 1032 | 1140 | 6.73542982702 |               |
| NM_004577    | PSPH     | 275  | 358  | 6.32039232774 |               |
| NM_004577    | PSPH     | 1563 | 1597 | 4.73141222685 |               |
| NM_004577    | PSPH     | 1927 | 1970 | 4.73542309597 |               |
| NM_004577    | PSPH     | 1160 | 1218 | 5.73542981947 |               |
| NM_004577    | PSPH     | 574  | 732  | 8.43586954516 |               |
| NM_004577    | PSPH     | 203  | 275  | 5.7354298268  |               |
| NM_004577    | PSPH     | 761  | 880  | 7.32039232774 |               |
| NM_004577    | PSPH     | 1633 | 1721 | 4.73542982702 |               |
| NM_004577    | PSPH     | 1246 | 1398 | 8.19486144566 |               |
| NM_004577    | PSPH     | 1786 | 1908 | 4.73542982702 |               |
| NM_005834    | TIMM17B  | 374  | 420  | 8.94747868342 |               |
| NM_001040455 | SIDT2    | 1766 | 1833 | 6.54393850156 |               |
| NM_005177    | ATP6V0A1 |      | 3742 | 3797          | 6.90564572851 |
| NM_005177    | ATP6V0A1 |      | 3992 | 4055          | 7.49060846515 |
| NM_005177    | ATP6V0A1 |      | 3446 | 3517          | 7.49060846515 |
| NM_005177    | ATP6V0A1 |      | 1141 | 1193          | 7.90563923337 |
| NM_005177    | ATP6V0A1 |      | 657  | 699           | 6.90564572851 |
| NM_005177    | ATP6V0A1 |      | 732  | 864           | 6.90564596442 |
| NM_005177    | ATP6V0A1 |      | 2534 | 2583          | 5.90162836425 |
| NM_005177    | ATP6V0A1 |      | 2623 | 2669          | 5.90162836425 |
| NM_005177    | ATP6V0A1 |      | 1062 | 1140          | 9.22757405931 |

|           |          |      |      |               |               |
|-----------|----------|------|------|---------------|---------------|
| NM_005177 | ATP6V0A1 |      | 2709 | 2897          | 9.49060846515 |
| NM_005177 | ATP6V0A1 |      | 165  | 399           | 9.71300088648 |
| NM_005177 | ATP6V0A1 |      | 2312 | 2519          | 10.1535734779 |
| NM_005177 | ATP6V0A1 |      | 1203 | 1351          | 9.36507758306 |
| NM_005177 | ATP6V0A1 |      | 2986 | 3078          | 8.22757405931 |
| NM_005177 | ATP6V0A1 |      | 1359 | 2302          | 12.7636269596 |
| NM_005177 | ATP6V0A1 |      | 930  | 1045          | 8.90564596442 |
| NM_005177 | ATP6V0A1 |      | 426  | 625           | 8.71300088648 |
| NM_005177 | ATP6V0A1 |      | 66   | 164           | 7.90564596442 |
| NM_005524 | HES1     | 1220 | 1268 | 5.81990751426 |               |
| NM_178150 | FBX018   | 1203 | 1254 | 5.42822155106 |               |
| NM_178150 | FBX018   | 653  | 702  | 6.42822155106 |               |
| NM_178150 | FBX018   | 962  | 1024 | 7.01318405178 |               |
| NM_178150 | FBX018   | 1807 | 1916 | 7.01720165173 |               |
| NM_178150 | FBX018   | 2831 | 2919 | 7.43223891532 |               |
| NM_000424 | KRT5     | 1314 | 1336 | 10.8041284252 |               |
| NM_001336 | CTSZ     | 603  | 677  | 12.5693392926 |               |
| NM_001336 | CTSZ     | 998  | 1031 | 10.7579667704 |               |
| NM_001336 | CTSZ     | 1112 | 1254 | 13.3469468713 |               |
| NM_001336 | CTSZ     | 842  | 978  | 12.7619843706 |               |
| NM_001336 | CTSZ     | 1314 | 1400 | 12.5693392926 |               |
| NM_001336 | CTSZ     | 678  | 829  | 12.931909372  |               |
| NM_001336 | CTSZ     | 479  | 601  | 12.931909372  |               |
| NM_001336 | CTSZ     | 161  | 259  | 10.7619843706 |               |
| NM_001336 | CTSZ     | 384  | 461  | 9.76198437058 |               |
| NM_001336 | CTSZ     | 269  | 384  | 11.7619843706 |               |
| NM_020368 | UTP3     | 1004 | 1039 | 5.21239597344 |               |
| NM_020368 | UTP3     | 1242 | 1318 | 7.53834166095 |               |
| NM_020368 | UTP3     | 57   | 129  | 6.13227436423 |               |
| NM_020368 | UTP3     | 1572 | 1631 | 6.80136934328 |               |
| NM_020368 | UTP3     | 1170 | 1235 | 6.2162398233  |               |
| NM_020368 | UTP3     | 154  | 219  | 6.2162398233  |               |
| NM_020368 | UTP3     | 782  | 846  | 5.13227436423 |               |
| NM_020368 | UTP3     | 1895 | 1936 | 5.13227436423 |               |
| NM_020365 | EIF2B3   | 514  | 608  | 7.63340077455 |               |
| NM_181453 | GCC2     | 311  | 425  | 3.51468842087 |               |
| NM_181453 | GCC2     | 5799 | 5889 | 3.51468841333 |               |
| NM_020360 | PLSCR3   | 405  | 469  | 11.0189233044 |               |
| NM_020360 | PLSCR3   | 764  | 874  | 8.43396056797 |               |
| NM_020362 | PITHD1   | 373  | 468  | 7.5285718603  |               |
| NM_020362 | PITHD1   | 1423 | 1476 | 6.52455426035 |               |
| NM_020362 | PITHD1   | 507  | 544  | 6.44443265114 |               |
| NM_020362 | PITHD1   | 1235 | 1281 | 7.52455426035 |               |
| NM_020362 | PITHD1   | 585  | 681  | 8.11353436124 |               |
| NM_020362 | PITHD1   | 812  | 862  | 6.52455426035 |               |
| NM_020362 | PITHD1   | 1065 | 1187 | 8.11353436124 |               |
| NM_144589 | COMTD1   | 543  | 604  | 10.5527289387 |               |
| NM_006813 | PNRC1    | 67   | 133  | 6.64915856147 |               |
| NM_006813 | PNRC1    | 139  | 221  | 8.64933231179 |               |
| NM_006813 | PNRC1    | 1489 | 1574 | 6.64933230424 |               |

|              |              |      |               |               |
|--------------|--------------|------|---------------|---------------|
| NM_144581    | C14orf149    | 516  | 591           | 9.37452484998 |
| NM_144580    | C1orf85 13   | 77   | 10.2828782328 |               |
| NM_144580    | C1orf85 1434 | 1476 | 10.2828782328 |               |
| NM_144580    | C1orf85 395  | 474  | 10.2828782328 |               |
| NM_144580    | C1orf85 480  | 610  | 12.3532675607 |               |
| NM_144580    | C1orf85 949  | 1133 | 12.1308751393 |               |
| NM_144580    | C1orf85 247  | 384  | 11.5459126386 |               |
| NM_144580    | C1orf85 1178 | 1410 | 12.484512094  |               |
| NM_144580    | C1orf85 1484 | 1602 | 11.1308751393 |               |
| NM_144580    | C1orf85 80   | 247  | 12.4203817565 |               |
| NM_144580    | C1orf85 694  | 913  | 11.76830506   |               |
| NM_144582    | TEX261 3039  | 3100 | 7.23234937632 |               |
| NM_144582    | TEX261 2738  | 2776 | 6.31631483539 |               |
| NM_144582    | TEX261 1143  | 1309 | 8.90145108643 |               |
| NM_144582    | TEX261 2776  | 2834 | 7.63841668059 |               |
| NM_144582    | TEX261 2691  | 2727 | 7.90144435537 |               |
| NM_144582    | TEX261 2887  | 2973 | 6.3164885857  |               |
| NM_144582    | TEX261 110   | 153  | 6.3164885857  |               |
| NM_144582    | TEX261 1388  | 1461 | 6.90145108643 |               |
| NM_144582    | TEX261 2976  | 3024 | 6.90127733611 |               |
| NM_144582    | TEX261 2534  | 2581 | 6.31631483539 |               |
| NM_144582    | TEX261 477   | 587  | 7.63841668059 |               |
| NM_144582    | TEX261 675   | 741  | 5.31247098553 |               |
| NM_144582    | TEX261 258   | 439  | 8.90145108643 |               |
| NM_144582    | TEX261 169   | 238  | 6.90145108642 |               |
| NM_144582    | TEX261 1519  | 1579 | 6.31631483539 |               |
| NM_144582    | TEX261 852   | 922  | 5.31648834979 |               |
| NM_144582    | TEX261 2152  | 2218 | 5.31631483539 |               |
| NM_144582    | TEX261 2238  | 2422 | 8.12384350776 |               |
| NM_144582    | TEX261 1602  | 1708 | 6.90145108643 |               |
| NM_144582    | TEX261 3111  | 3310 | 8.12384350776 |               |
| NM_002306    | LGALS3 598   | 665  | 8.22892622498 |               |
| NM_002306    | LGALS3 465   | 509  | 8.22875247488 |               |
| NM_002306    | LGALS3 678   | 723  | 8.72974951654 |               |
| NM_006811    | SERINC3 2122 | 2185 | 7.18097554469 |               |
| NM_006811    | SERINC3 1750 | 1794 | 4.85502984963 |               |
| NM_006811    | SERINC3 1804 | 1926 | 8.02897245124 |               |
| NM_006811    | SERINC3 1478 | 1718 | 9.44400995052 |               |
| NM_006811    | SERINC3 649  | 1346 | 11.2340868811 |               |
| NM_006811    | SERINC3 2420 | 2512 | 6.8590474498  |               |
| NM_006811    | SERINC3 552  | 625  | 7.8590474498  |               |
| NM_006811    | SERINC3 170  | 547  | 10.1444496687 |               |
| NM_006811    | SERINC3 1350 | 1474 | 7.66640237186 |               |
| NM_001012333 | MDK 398      | 465  | 5.7478095275  |               |
| NM_001012333 | MDK 755      | 806  | 3.42186383244 |               |
| NM_001012333 | MDK 685      | 755  | 5.01084393333 |               |
| NM_006714    | SMPDL3A 1555 | 1605 | 6.81061376159 |               |
| NM_006714    | SMPDL3A 567  | 609  | 5.48851191638 |               |
| NM_006714    | SMPDL3A 510  | 551  | 4.48466806653 |               |
| NM_006714    | SMPDL3A 1330 | 1486 | 7.65861066814 |               |

|           |          |      |      |               |               |
|-----------|----------|------|------|---------------|---------------|
| NM_006714 | SMPDL3A  | 1141 | 1199 | 6.07364143637 |               |
| NM_006714 | SMPDL3A  | 927  | 1023 | 6.48868566648 |               |
| NM_006717 | SPIN1    | 2962 | 3011 | 4.46526610477 |               |
| NM_006717 | SPIN1    | 2841 | 2885 | 6.04621100554 |               |
| NM_006717 | SPIN1    | 573  | 651  | 6.46526610499 |               |
| NM_006717 | SPIN1    | 4040 | 4103 | 4.46526610498 |               |
| NM_006717 | SPIN1    | 4260 | 4324 | 5.46124850482 |               |
| NM_006717 | SPIN1    | 4198 | 4254 | 4.46509235467 |               |
| NM_006717 | SPIN1    | 204  | 246  | 4.46124850482 |               |
| NM_006717 | SPIN1    | 2499 | 2573 | 5.46525937394 |               |
| NM_006717 | SPIN1    | 2725 | 2821 | 6.46526610477 |               |
| NM_006717 | SPIN1    | 932  | 1009 | 4.46526609744 |               |
| NM_006716 | DBF4     | 2230 | 2301 | 5.76583681678 |               |
| NM_006713 | SUB1     | 668  | 732  | 4.06158288463 |               |
| NM_006713 | SUB1     | 1192 | 1303 | 3.64654538536 |               |
| NM_006713 | SUB1     | 932  | 1050 | 3.64654538514 |               |
| NM_006713 | SUB1     | 301  | 650  | 7.06158288464 |               |
| NM_006713 | SUB1     | 89   | 290  | 5.96847348025 |               |
| NM_006712 | FASTK    | 1803 | 1838 | 9.03308357844 |               |
| NM_006712 | FASTK    | 215  | 289  | 8.0330903095  |               |
| NM_006712 | FASTK    | 1171 | 1212 | 7.94895110011 |               |
| NM_006712 | FASTK    | 487  | 600  | 9.0330903095  |               |
| NM_006712 | FASTK    | 1318 | 1400 | 9.0330903095  |               |
| NM_138957 | MAPK1    | 324  | 395  | 6.33668924007 |               |
| NM_138957 | MAPK1    | 1229 | 1326 | 6.33668924007 |               |
| NM_138957 | MAPK1    | 921  | 1025 | 6.07365483423 |               |
| NM_138957 | MAPK1    | 415  | 528  | 6.33668924007 |               |
| NM_138957 | MAPK1    | 55   | 134  | 6.07365483423 |               |
| NM_138957 | MAPK1    | 273  | 322  | 3.75172000829 |               |
| NM_138957 | MAPK1    | 768  | 911  | 7.21115835798 |               |
| NM_138957 | MAPK1    | 534  | 760  | 8.21115835798 |               |
| NM_138957 | MAPK1    | 1046 | 1215 | 7.5590816614  |               |
| NM_006743 | RBM3     | 418  | 462  | 3.83762265856 |               |
| NM_006743 | RBM3     | 581  | 662  | 5.84164025873 |               |
| NM_006743 | RBM3     | 667  | 819  | 7.30107187737 |               |
| NM_006743 | RBM3     | 928  | 1022 | 6.16356835362 |               |
| NM_006743 | RBM3     | 271  | 385  | 5.84164025873 |               |
| NM_006743 | RBM3     | 1461 | 1573 | 5.42660275945 |               |
| NM_006743 | RBM3     | 103  | 264  | 6.84164025873 |               |
| NM_006743 | RBM3     | 1234 | 1375 | 3.84164025873 |               |
| NM_015344 | LEPROTL1 |      | 124  | 194           | 7.93623404066 |
| NM_015344 | LEPROTL1 |      | 318  | 379           | 6.93623403312 |
| NM_015344 | LEPROTL1 |      | 459  | 551           | 6.93623380475 |
| NM_015344 | LEPROTL1 |      | 251  | 312           | 6.93622730961 |
| NM_002014 | FKBP4    | 1842 | 1932 | 4.29041034049 |               |
| NM_002014 | FKBP4    | 1435 | 1473 | 4.29040360944 |               |
| NM_002014 | FKBP4    | 236  | 320  | 4.29041034049 |               |
| NM_002014 | FKBP4    | 1281 | 1376 | 5.61233843538 |               |
| NM_002014 | FKBP4    | 916  | 1126 | 7.29041034049 |               |
| NM_002014 | FKBP4    | 562  | 690  | 6.09776526255 |               |



|              |         |      |      |               |
|--------------|---------|------|------|---------------|
| NM_002014    | FKBP4   | 321  | 476  | 7.1973009361  |
| NM_002014    | FKBP4   | 700  | 795  | 5.29041034049 |
| NM_002014    | FKBP4   | 1645 | 1756 | 5.29041034049 |
| NM_002014    | FKBP4   | 813  | 903  | 5.61233843538 |
| NM_002014    | FKBP4   | 1980 | 2217 | 7.09776526255 |
| NM_002014    | FKBP4   | 1143 | 1251 | 4.87537284121 |
| NM_002015    | FOX01   | 2709 | 2772 | 7.38015428758 |
| NM_015545    | PTCD1   | 612  | 679  | 8.09374823177 |
| NM_015545    | PTCD1   | 4033 | 4090 | 8.09374823177 |
| NM_002013    | FKBP3   | 290  | 337  | 1.45701569668 |
| NM_002013    | FKBP3   | 595  | 657  | 1.4610265658  |
| NM_002013    | FKBP3   | 722  | 789  | 2.45701569668 |
| NM_002013    | FKBP3   | 794  | 913  | 2.46103329685 |
| NM_013234    | EIF3K   | 159  | 227  | 5.33058963312 |
| NM_013234    | EIF3K   | 642  | 707  | 5.55298205446 |
| NM_013234    | EIF3K   | 477  | 628  | 6.20505875104 |
| NM_013234    | EIF3K   | 285  | 396  | 4.33058963311 |
| NM_013234    | EIF3K   | 707  | 822  | 5.55298205446 |
| NM_006337    | MCRS1   | 987  | 1124 | 7.97460936202 |
| NM_006337    | MCRS1   | 646  | 687  | 5.38964013024 |
| NM_006337    | MCRS1   | 1207 | 1248 | 5.3896468613  |
| NM_006337    | MCRS1   | 190  | 248  | 5.38964686107 |
| NM_006337    | MCRS1   | 1723 | 1763 | 5.38964013024 |
| NM_006337    | MCRS1   | 1319 | 1357 | 5.30550765191 |
| NM_006337    | MCRS1   | 1448 | 1513 | 6.38562926112 |
| NM_006337    | MCRS1   | 573  | 639  | 6.38964662538 |
| NM_006337    | MCRS1   | 53   | 166  | 7.71157495618 |
| NM_013236    | ATXN10  | 1352 | 1417 | 5.62420620984 |
| NM_013236    | ATXN10  | 1046 | 1090 | 5.36116507295 |
| NM_013236    | ATXN10  | 356  | 474  | 6.49867532775 |
| NM_013236    | ATXN10  | 1421 | 1482 | 4.62420620984 |
| NM_013236    | ATXN10  | 528  | 710  | 7.62420620984 |
| NM_013236    | ATXN10  | 714  | 1044 | 7.62420620984 |
| NM_013236    | ATXN10  | 180  | 263  | 4.62420620984 |
| NM_013236    | ATXN10  | 1648 | 1764 | 5.03924370911 |
| NM_013236    | ATXN10  | 1095 | 1349 | 7.73968342726 |
| NM_013236    | ATXN10  | 1784 | 1965 | 6.62420620984 |
| NM_013237    | PRELID1 | 627  | 671  | 4.34372138226 |
| NM_013237    | PRELID1 | 675  | 739  | 3.02179328738 |
| NM_013237    | PRELID1 | 187  | 298  | 4.6067557881  |
| NM_013237    | PRELID1 | 92   | 127  | 1.937654078   |
| NM_013237    | PRELID1 | 338  | 625  | 7.02179328738 |
| NM_001164619 | GPC3    | 2018 | 2135 | 2.28842021829 |
| NM_001164619 | GPC3    | 49   | 213  | 2.08196934083 |
| NM_001164619 | GPC3    | 216  | 2008 | 6.61514929944 |
| NM_013233    | STK39   | 1485 | 1544 | 5.93038338839 |
| NM_013233    | STK39   | 1307 | 1360 | 3.93037665755 |
| NM_013233    | STK39   | 607  | 662  | 4.93038338839 |
| NM_013233    | STK39   | 676  | 748  | 3.93038338861 |
| NM_013233    | STK39   | 2795 | 2841 | 3.93038315269 |

|              |        |       |       |               |
|--------------|--------|-------|-------|---------------|
| NM_013233    | STK39  | 2422  | 2532  | 6.51534588933 |
| NM_013233    | STK39  | 983   | 1031  | 3.84624417922 |
| NM_013233    | STK39  | 2913  | 3000  | 3.93038338861 |
| NM_013233    | STK39  | 754   | 824   | 5.51534588178 |
| NM_013233    | STK39  | 1180  | 1234  | 3.93020963829 |
| NM_013233    | STK39  | 2280  | 2364  | 5.93038338861 |
| NM_013233    | STK39  | 2537  | 2639  | 5.51534588911 |
| NM_013233    | STK39  | 2665  | 2738  | 5.93038338839 |
| NM_013233    | STK39  | 297   | 476   | 6.73773831066 |
| NM_013233    | STK39  | 1625  | 1780  | 6.73773831066 |
| NM_013233    | STK39  | 1970  | 2130  | 5.51534588933 |
| NM_013233    | STK39  | 2848  | 2913  | 4.93020963829 |
| NM_001080495 | TNRC18 | 9634  | 9682  | 7.66913541331 |
| NM_001080495 | TNRC18 | 4503  | 4563  | 7.08417291259 |
| NM_001080495 | TNRC18 | 839   | 927   | 6.08417291236 |
| NM_001080495 | TNRC18 | 4210  | 4273  | 7.66913541331 |
| NM_001080495 | TNRC18 | 4883  | 4929  | 7.08416618153 |
| NM_001080495 | TNRC18 | 1154  | 1224  | 6.08417267667 |
| NM_001080495 | TNRC18 | 10477 | 10536 | 8.40610100747 |
| NM_001080495 | TNRC18 | 1985  | 2028  | 6.08416618153 |
| NM_001080495 | TNRC18 | 591   | 660   | 7.08417291259 |
| NM_001080495 | TNRC18 | 7705  | 7766  | 7.08417267667 |
| NM_001080495 | TNRC18 | 9013  | 9056  | 7.08417291236 |
| NM_001080495 | TNRC18 | 5694  | 5782  | 7.66913541331 |
| NM_001080495 | TNRC18 | 3661  | 3757  | 7.08417291259 |
| NM_001080495 | TNRC18 | 2046  | 2101  | 6.0000337032  |
| NM_001080495 | TNRC18 | 3557  | 3609  | 7.66912868225 |
| NM_001080495 | TNRC18 | 722   | 765   | 6.08416618153 |
| NM_001080495 | TNRC18 | 3172  | 3224  | 6.08015531241 |
| NM_001080495 | TNRC18 | 4306  | 4392  | 7.08417291259 |
| NM_001080495 | TNRC18 | 5226  | 5385  | 8.66913541331 |
| NM_001080495 | TNRC18 | 4425  | 4466  | 6.0000337032  |
| NM_001080495 | TNRC18 | 3925  | 4112  | 9.08417291259 |
| NM_001080495 | TNRC18 | 8772  | 8845  | 8.66913541331 |
| NM_001080495 | TNRC18 | 6305  | 6391  | 7.08417291259 |
| NM_001080495 | TNRC18 | 5915  | 5952  | 6.0000337032  |
| NM_001080495 | TNRC18 | 7291  | 7317  | 7.66912868225 |
| NM_001080495 | TNRC18 | 5493  | 5605  | 8.89152783464 |
| NM_001080495 | TNRC18 | 8208  | 8331  | 8.40610100747 |
| NM_001080495 | TNRC18 | 4595  | 4699  | 7.66913541331 |
| NM_001080495 | TNRC18 | 6951  | 6999  | 6.08416618153 |
| NM_001080495 | TNRC18 | 5789  | 5862  | 7.66913541331 |
| NM_001080495 | TNRC18 | 7009  | 7230  | 9.54360453122 |
| NM_001080495 | TNRC18 | 3768  | 3904  | 7.08417291259 |
| NM_001080495 | TNRC18 | 5058  | 5222  | 7.08417291259 |
| NM_001080495 | TNRC18 | 2130  | 2239  | 7.08417291259 |
| NM_001080495 | TNRC18 | 2381  | 2682  | 9.9910635082  |
| NM_001080495 | TNRC18 | 4708  | 4830  | 8.89152783464 |
| NM_001080495 | TNRC18 | 2891  | 2998  | 8.66913541331 |
| NM_001080495 | TNRC18 | 9065  | 9249  | 8.08417291259 |

|              |         |      |      |               |
|--------------|---------|------|------|---------------|
| NM_001080495 | TNRC18  | 6673 | 6903 | 9.54360453122 |
| NM_001080495 | TNRC18  | 2764 | 2881 | 9.08417291259 |
| NM_001164615 | FZD6    | 1024 | 1063 | 5.96827938533 |
| NM_001164615 | FZD6    | 1158 | 1222 | 8.05241835879 |
| NM_001164615 | FZD6    | 1068 | 1119 | 8.63738109521 |
| NM_001164615 | FZD6    | 1358 | 1417 | 7.63738109542 |
| NM_001164615 | FZD6    | 569  | 624  | 7.05241186366 |
| NM_001164615 | FZD6    | 1514 | 1682 | 8.3743466896  |
| NM_001164615 | FZD6    | 861  | 1023 | 8.85977351677 |
| NM_007001    | SLC35D2 | 924  | 968  | 5.51136666848 |
| NM_007001    | SLC35D2 | 317  | 410  | 7.51137339953 |
| NM_007001    | SLC35D2 | 436  | 516  | 6.09633590003 |
| NM_007001    | SLC35D2 | 640  | 694  | 4.50735579936 |
| NM_007001    | SLC35D2 | 1354 | 1465 | 6.83330149442 |
| NM_007001    | SLC35D2 | 802  | 900  | 5.51136666848 |
| NM_007001    | SLC35D2 | 980  | 1188 | 7.83330149442 |
| NM_007001    | SLC35D2 | 156  | 258  | 6.83330149442 |
| NM_007006    | NUDT21  | 764  | 812  | 5.00854925632 |
| NM_007006    | NUDT21  | 1922 | 1995 | 2.68662116121 |
| NM_007006    | NUDT21  | 630  | 675  | 2.68260356126 |
| NM_007006    | NUDT21  | 4240 | 4296 | 2.68644741111 |
| NM_007006    | NUDT21  | 815  | 845  | 3.60248195205 |
| NM_007006    | NUDT21  | 107  | 233  | 4.27158366215 |
| NM_007006    | NUDT21  | 500  | 598  | 5.00854925632 |
| NM_007006    | NUDT21  | 310  | 416  | 5.00854925632 |
| NM_007006    | NUDT21  | 1022 | 1081 | 2.68661443038 |
| NM_007007    | CPSF6   | 4972 | 5018 | 5.33621336042 |
| NM_007007    | CPSF6   | 1471 | 1532 | 6.74210691438 |
| NM_007007    | CPSF6   | 1543 | 1680 | 7.22770749187 |
| NM_007007    | CPSF6   | 6286 | 6331 | 5.33621336042 |
| NM_007007    | CPSF6   | 696  | 746  | 4.42035256981 |
| NM_007007    | CPSF6   | 4885 | 4963 | 5.41633496964 |
| NM_007007    | CPSF6   | 1819 | 1919 | 7.42035256981 |
| NM_007007    | CPSF6   | 1920 | 2013 | 4.42035256981 |
| NM_007007    | CPSF6   | 73   | 220  | 7.59027757125 |
| NM_007007    | CPSF6   | 521  | 596  | 7.42035256981 |
| NM_007007    | CPSF6   | 5952 | 6014 | 5.42017881949 |
| NM_007007    | CPSF6   | 6465 | 6524 | 5.42035256226 |
| NM_007007    | CPSF6   | 1276 | 1470 | 8.12079228795 |
| NM_007007    | CPSF6   | 223  | 412  | 7.42035256981 |
| NM_006351    | TIMM44  | 403  | 480  | 7.05923564134 |
| NM_006351    | TIMM44  | 1413 | 1464 | 6.47444689071 |
| NM_006351    | TIMM44  | 1115 | 1212 | 6.47444689093 |
| NM_003331    | TYK2    | 853  | 906  | 9.0921239743  |
| NM_003331    | TYK2    | 3434 | 3489 | 7.50314387341 |
| NM_003331    | TYK2    | 139  | 246  | 9.0921239743  |
| NM_003331    | TYK2    | 3623 | 3693 | 9.50716147358 |
| NM_003331    | TYK2    | 690  | 761  | 9.0921239743  |
| NM_003331    | TYK2    | 1994 | 2047 | 8.50716147358 |
| NM_003331    | TYK2    | 1461 | 1549 | 9.09212373838 |

|              |          |      |      |                    |
|--------------|----------|------|------|--------------------|
| NM_003331    | TYK2     | 4044 | 4157 | 9.82908956847      |
| NM_003331    | TYK2     | 2537 | 2603 | 8.50715474253      |
| NM_003331    | TYK2     | 3216 | 3288 | 8.50716123766      |
| NM_003331    | TYK2     | 1555 | 1682 | 7.50716147358      |
| NM_003331    | TYK2     | 2994 | 3087 | 9.0921239743       |
| NM_003331    | TYK2     | 2406 | 2475 | 8.50716147357      |
| NM_003331    | TYK2     | 471  | 559  | 8.50716146603      |
| NM_006212    | PFKFB2   | 5891 | 5939 | 10.2712724755      |
| NM_006212    | PFKFB2   | 1078 | 1116 | 11.2712724755      |
| NM_145185    | MAP2K7   | 1905 | 1963 | 6.93514032267      |
| NM_145185    | MAP2K7   | 1111 | 1254 | 4.93514032267      |
| NM_145185    | MAP2K7   | 2042 | 2085 | 5.93514032267      |
| NM_145185    | MAP2K7   | 1695 | 1831 | 8.25706841756      |
| NM_145185    | MAP2K7   | 733  | 794  | 4.9311227225       |
| NM_145185    | MAP2K7   | 970  | 1020 | 4.93496657235      |
| NM_145185    | MAP2K7   | 2610 | 2654 | 5.93496657235      |
| NM_145185    | MAP2K7   | 1415 | 1461 | 4.9311227225       |
| NM_145185    | MAP2K7   | 554  | 615  | 4.93514031512      |
| NM_001172681 | ZNF641   | 388  | 418  | 9.42472188549      |
| NM_003338    | UBE2D1   | 793  | 874  | 10.6693723595      |
| NM_003338    | UBE2D1   | 460  | 560  | 12.0844100947      |
| NM_003338    | UBE2D1   | 899  | 932  | 10.0002708853      |
| NM_003338    | UBE2D1   | 1453 | 1487 | 9.08039249455      |
| NM_031311    | CPVL     | 1137 | 1204 | 5.8308575008       |
| NM_031311    | CPVL     | 701  | 743  | 5.4158200013       |
| NM_031311    | CPVL     | 587  | 695  | 6.53129721894      |
| NM_031311    | CPVL     | 1213 | 1428 | 6.73774809641      |
| NM_031311    | CPVL     | 1445 | 1610 | 6.73774809641      |
| NM_031311    | CPVL     | 750  | 1125 | 8.44556734491      |
| NM_031311    | CPVL     | 95   | 582  | 8.22317492358      |
| NM_016480    | PAIP2    | 111  | 166  | 3.45700373855      |
| NM_016480    | PAIP2    | 326  | 371  | 2.79191962861      |
| NM_016480    | PAIP2    | 646  | 729  | 2.87605883799      |
| NM_016480    | PAIP2    | 545  | 610  | 2.87605883799      |
| NM_024482    | GMEB1    | 503  | 567  | 7.49831737757      |
| NM_024482    | GMEB1    | 1045 | 1096 | 8.49831737757      |
| NM_001136050 | DHRS1    | 1214 | 1273 | 5.76919967532      |
| NM_001136050 | DHRS1    | 855  | 909  | 4.68506046594      |
| NM_001114600 | C1orf144 |      | 1250 | 1299 7.69187167182 |
| NM_001114600 | C1orf144 |      | 2940 | 3029 6.68786080271 |
| NM_001114600 | C1orf144 |      | 751  | 842 9.01380649777  |
| NM_001114600 | C1orf144 |      | 1625 | 1684 6.68786080271 |
| NM_001114600 | C1orf144 |      | 2159 | 2216 6.68786080271 |
| NM_001114600 | C1orf144 |      | 1316 | 1377 7.68786080271 |
| NM_001114600 | C1orf144 |      | 843  | 875 7.60773919349  |
| NM_001114600 | C1orf144 |      | 1867 | 1962 8.27684066768 |
| NM_015540    | RPAP1    | 4502 | 4547 | 7.72935478407      |
| NM_015540    | RPAP1    | 1933 | 1997 | 7.72533741981      |
| NM_015540    | RPAP1    | 4284 | 4350 | 8.72935478407      |
| NM_015540    | RPAP1    | 4377 | 4502 | 8.72935501999      |

|           |         |       |       |               |
|-----------|---------|-------|-------|---------------|
| NM_015540 | RPAP1   | 1875  | 1923  | 7.72935501998 |
| NM_015540 | RPAP1   | 2081  | 2193  | 7.72935501244 |
| NM_015540 | RPAP1   | 3980  | 4074  | 10.0512831149 |
| NM_015540 | RPAP1   | 2470  | 2543  | 10.3143107897 |
| NM_015540 | RPAP1   | 404   | 475   | 7.72934828893 |
| NM_020130 | C8orf4  | 1162  | 1212  | 2.89309943305 |
| NM_003491 | NAA10   | 378   | 440   | 7.54720059139 |
| NM_003491 | NAA10   | 281   | 344   | 6.96625545492 |
| NM_003491 | NAA10   | 198   | 264   | 7.55121819156 |
| NM_003491 | NAA10   | 590   | 665   | 5.96625569062 |
| NM_003491 | NAA10   | 453   | 575   | 5.96625569084 |
| NM_003492 | TMEM187 | 1207  | 1245  | 11.0480492619 |
| NM_003496 | TRRAP   | 9462  | 9515  | 9.53366197026 |
| NM_003496 | TRRAP   | 7517  | 7579  | 7.21173363945 |
| NM_003496 | TRRAP   | 136   | 197   | 8.79267877592 |
| NM_003496 | TRRAP   | 11950 | 12006 | 8.79267877592 |
| NM_003496 | TRRAP   | 5135  | 5191  | 8.79668964504 |
| NM_003496 | TRRAP   | 8039  | 8102  | 7.21173386782 |
| NM_003496 | TRRAP   | 11256 | 11309 | 8.79669637608 |
| NM_003496 | TRRAP   | 1820  | 1921  | 8.79669637587 |
| NM_003496 | TRRAP   | 2869  | 2974  | 9.53366197026 |
| NM_003496 | TRRAP   | 6419  | 6483  | 9.21173387537 |
| NM_003496 | TRRAP   | 3750  | 3840  | 8.79669637608 |
| NM_003496 | TRRAP   | 7232  | 7302  | 8.79669614017 |
| NM_003496 | TRRAP   | 3685  | 3743  | 7.21173387536 |
| NM_003496 | TRRAP   | 5622  | 5662  | 8.21156012505 |
| NM_003496 | TRRAP   | 3488  | 3536  | 7.21172714431 |
| NM_003496 | TRRAP   | 1078  | 1131  | 7.21172714431 |
| NM_003496 | TRRAP   | 12024 | 12119 | 7.21173387537 |
| NM_003496 | TRRAP   | 5091  | 5132  | 8.79669637609 |
| NM_003496 | TRRAP   | 11483 | 11542 | 7.20771627519 |
| NM_003496 | TRRAP   | 7927  | 7985  | 8.79669637608 |
| NM_003496 | TRRAP   | 6497  | 6564  | 8.21173386782 |
| NM_003496 | TRRAP   | 5975  | 6010  | 8.12759466598 |
| NM_003496 | TRRAP   | 4844  | 4890  | 7.12759466598 |
| NM_003496 | TRRAP   | 8450  | 8521  | 7.21156012505 |
| NM_003496 | TRRAP   | 6290  | 6325  | 7.21172714431 |
| NM_003496 | TRRAP   | 6785  | 6836  | 7.21173386782 |
| NM_003496 | TRRAP   | 9320  | 9365  | 7.20771627519 |
| NM_003496 | TRRAP   | 6636  | 6699  | 9.21173387515 |
| NM_003496 | TRRAP   | 10536 | 10595 | 8.79652262577 |
| NM_003496 | TRRAP   | 1451  | 1502  | 8.20771627519 |
| NM_003496 | TRRAP   | 6147  | 6279  | 9.21173387537 |
| NM_003496 | TRRAP   | 540   | 613   | 8.79669636854 |
| NM_003496 | TRRAP   | 2409  | 2484  | 7.21173387537 |
| NM_003496 | TRRAP   | 10371 | 10427 | 8.21173363945 |
| NM_003496 | TRRAP   | 9251  | 9317  | 7.21173386782 |
| NM_003496 | TRRAP   | 2060  | 2127  | 7.21173387515 |
| NM_003496 | TRRAP   | 5390  | 5499  | 8.79669637609 |
| NM_003496 | TRRAP   | 6568  | 6629  | 8.21173363945 |

|           |         |       |       |                |
|-----------|---------|-------|-------|----------------|
| NM_003496 | TRRAP   | 11873 | 11937 | 7.21173363945  |
| NM_003496 | TRRAP   | 9675  | 9769  | 8.21173387537  |
| NM_003496 | TRRAP   | 811   | 876   | 8.21156012505  |
| NM_003496 | TRRAP   | 10250 | 10326 | 8.79669637587  |
| NM_003496 | TRRAP   | 8769  | 8835  | 8.21172714431  |
| NM_003496 | TRRAP   | 7362  | 7517  | 9.79669637609  |
| NM_003496 | TRRAP   | 2241  | 2406  | 10.3816588768  |
| NM_003496 | TRRAP   | 2169  | 2238  | 8.21172714431  |
| NM_003496 | TRRAP   | 2975  | 3123  | 8.21173387537  |
| NM_003496 | TRRAP   | 4497  | 4581  | 8.79669637609  |
| NM_003496 | TRRAP   | 11104 | 11240 | 10.0190887974  |
| NM_003496 | TRRAP   | 3584  | 3684  | 8.79668964504  |
| NM_003496 | TRRAP   | 9051  | 9121  | 8.79669637609  |
| NM_003496 | TRRAP   | 11363 | 11461 | 8.79669637609  |
| NM_003496 | TRRAP   | 4367  | 4482  | 9.21173387537  |
| NM_003496 | TRRAP   | 2688  | 2804  | 9.79669637609  |
| NM_003496 | TRRAP   | 1544  | 1661  | 10.3816588768  |
| NM_003496 | TRRAP   | 12324 | 12435 | 7.21173387536  |
| NM_003496 | TRRAP   | 5246  | 5346  | 8.79669637609  |
| NM_003496 | TRRAP   | 2496  | 2667  | 10.0190887974  |
| NM_003496 | TRRAP   | 1251  | 1334  | 7.21172714431  |
| NM_003496 | TRRAP   | 4702  | 4810  | 9.79669637609  |
| NM_207368 | FAM195B | 1174  | 1208  | 5.81890235048  |
| NM_020132 | AGPAT3  | 432   | 484   | 4.82485667064  |
| NM_020132 | AGPAT3  | 587   | 669   | 6.6322115927   |
| NM_020132 | AGPAT3  | 1239  | 1332  | 4.82485667064  |
| NM_020132 | AGPAT3  | 2094  | 2162  | 3.82485667042  |
| NM_020132 | AGPAT3  | 682   | 746   | 5.40981917136  |
| NM_020132 | AGPAT3  | 364   | 408   | 3.82485666309  |
| NM_020132 | AGPAT3  | 1748  | 1795  | 3.82083907047  |
| NM_020132 | AGPAT3  | 3455  | 3519  | 3.82485667064  |
| NM_020132 | AGPAT3  | 122   | 179   | 3.82083907047  |
| NM_020132 | AGPAT3  | 508   | 580   | 6.40981917136  |
| NM_020132 | AGPAT3  | 1336  | 1405  | 3.82485643472  |
| NM_020132 | AGPAT3  | 240   | 361   | 6.40981917136  |
| NM_020132 | AGPAT3  | 1967  | 2084  | 6.14678476553  |
| NM_020132 | AGPAT3  | 1118  | 1235  | 6.40981917136  |
| NM_020132 | AGPAT3  | 2208  | 2390  | 6.6322115927   |
| NM_020132 | AGPAT3  | 868   | 1073  | 6.40981917136  |
| NM_001417 | EIF4B   | 2910  | 2980  | 2.23577838346  |
| NM_001417 | EIF4B   | 170   | 218   | 1.23560463315  |
| NM_001417 | EIF4B   | 2326  | 2422  | 0.235778383457 |
| NM_001417 | EIF4B   | 3435  | 3478  | 0.235778147545 |
| NM_001417 | EIF4B   | 1665  | 1708  | 0.231760783291 |
| NM_001417 | EIF4B   | 605   | 671   | 3.55770647835  |
| NM_001417 | EIF4B   | 3632  | 3703  | 2.23577838346  |
| NM_001417 | EIF4B   | 2445  | 2511  | 2.82074088418  |
| NM_001417 | EIF4B   | 1297  | 1352  | 1.23577838324  |
| NM_001417 | EIF4B   | 3792  | 3837  | 1.82074088418  |
| NM_001417 | EIF4B   | 519   | 582   | 1.23176078329  |

|           |          |      |      |                    |
|-----------|----------|------|------|--------------------|
| NM_001417 | EIF4B    | 2609 | 2718 | 1.23577838346      |
| NM_001417 | EIF4B    | 2028 | 2182 | 3.55770647835      |
| NM_001417 | EIF4B    | 1751 | 1954 | 3.04313330552      |
| NM_001417 | EIF4B    | 949  | 1293 | 4.62809580624      |
| NM_001417 | EIF4B    | 242  | 516  | 4.87963457324      |
| NM_001417 | EIF4B    | 1353 | 1517 | 2.82074088418      |
| NM_001417 | EIF4B    | 673  | 933  | 4.04313330552      |
| NM_001417 | EIF4B    | 3070 | 3217 | 3.23577838346      |
| NM_001417 | EIF4B    | 3844 | 3949 | 3.04313330552      |
| NM_001417 | EIF4B    | 3332 | 3406 | 1.82074088418      |
| NM_004175 | SNRPD3   | 1785 | 1830 | 1.99760389159      |
| NM_004175 | SNRPD3   | 724  | 818  | 4.66670560169      |
| NM_004175 | SNRPD3   | 623  | 707  | 5.25166810241      |
| NM_004175 | SNRPD3   | 347  | 402  | 4.08174310097      |
| NM_004175 | SNRPD3   | 2763 | 2794 | 2.0777255008       |
| NM_004175 | SNRPD3   | 998  | 1049 | 4.08174310075      |
| NM_004175 | SNRPD3   | 404  | 579  | 6.32967061441      |
| NM_004175 | SNRPD3   | 818  | 906  | 5.40367119586      |
| NM_004175 | SNRPD3   | 2507 | 2567 | 2.08174286505      |
| NM_004175 | SNRPD3   | 1370 | 1442 | 2.08174310075      |
| NM_004175 | SNRPD3   | 906  | 989  | 3.08174309342      |
| NM_004095 | EIF4EBP1 |      | 231  | 286 5.9323056191   |
| NM_014616 | ATP11B   | 5968 | 6020 | 6.68270228681      |
| NM_014616 | ATP11B   | 370  | 454  | 7.26767151858      |
| NM_014616 | ATP11B   | 3303 | 3369 | 7.26767151858      |
| NM_014616 | ATP11B   | 4651 | 4717 | 5.68270901031      |
| NM_014616 | ATP11B   | 2256 | 2310 | 5.68270878194      |
| NM_014616 | ATP11B   | 4804 | 4859 | 5.68270901031      |
| NM_014616 | ATP11B   | 1555 | 1604 | 6.68270901031      |
| NM_014616 | ATP11B   | 1363 | 1406 | 7.68270901031      |
| NM_014616 | ATP11B   | 1414 | 1469 | 7.26767151858      |
| NM_014616 | ATP11B   | 847  | 893  | 7.26767128267      |
| NM_014616 | ATP11B   | 675  | 772  | 8.49006393992      |
| NM_014616 | ATP11B   | 4175 | 4229 | 6.68270878194      |
| NM_014616 | ATP11B   | 1122 | 1164 | 6.67869141769      |
| NM_014616 | ATP11B   | 1686 | 1754 | 7.26749776827      |
| NM_014616 | ATP11B   | 287  | 365  | 5.68270228681      |
| NM_014616 | ATP11B   | 2598 | 2731 | 7.68270901786      |
| NM_014616 | ATP11B   | 1814 | 2012 | 8.85263401931      |
| NM_014616 | ATP11B   | 7145 | 7240 | 7.26766478753      |
| NM_014615 | KIAA0182 |      | 6749 | 6802 7.19448497225 |
| NM_014615 | KIAA0182 |      | 4154 | 4192 7.1985025722  |
| NM_014615 | KIAA0182 |      | 5083 | 5155 7.11436336304 |
| NM_014615 | KIAA0182 |      | 2508 | 2533 5.52940086232 |
| NM_014615 | KIAA0182 |      | 2152 | 2200 6.60952247153 |
| NM_014615 | KIAA0182 |      | 1857 | 1918 6.61353334065 |
| NM_014615 | KIAA0182 |      | 1034 | 1089 5.60952247153 |
| NM_014615 | KIAA0182 |      | 2790 | 2828 5.60952247153 |
| NM_014615 | KIAA0182 |      | 4694 | 4754 6.61336632138 |
| NM_014615 | KIAA0182 |      | 3884 | 3998 6.6135400717  |

|           |          |      |      |      |               |
|-----------|----------|------|------|------|---------------|
| NM_014615 | KIAA0182 |      | 5545 | 5679 | 6.6135400717  |
| NM_014614 | PSME4    | 5427 | 5514 |      | 4.64214305172 |
| NM_014614 | PSME4    | 6221 | 6274 |      | 6.22710555244 |
| NM_014614 | PSME4    | 5327 | 5374 |      | 4.6421428158  |
| NM_014614 | PSME4    | 4653 | 4704 |      | 5.64213632067 |
| NM_014614 | PSME4    | 4730 | 4813 |      | 6.22710555244 |
| NM_014614 | PSME4    | 5522 | 5566 |      | 5.63812545155 |
| NM_014614 | PSME4    | 6096 | 6153 |      | 5.64213632067 |
| NM_014614 | PSME4    | 5132 | 5182 |      | 5.64214304417 |
| NM_014614 | PSME4    | 2031 | 2153 |      | 6.64214305172 |
| NM_014614 | PSME4    | 6374 | 6424 |      | 4.63812545155 |
| NM_014614 | PSME4    | 2602 | 2653 |      | 5.63812545155 |
| NM_014614 | PSME4    | 5606 | 5708 |      | 6.96407114661 |
| NM_014614 | PSME4    | 320  | 380  |      | 5.63812545155 |
| NM_014614 | PSME4    | 1675 | 1740 |      | 5.64214305172 |
| NM_014614 | PSME4    | 1538 | 1668 |      | 6.96407114661 |
| NM_014614 | PSME4    | 4483 | 4544 |      | 5.64214305172 |
| NM_014614 | PSME4    | 959  | 1021 |      | 4.55800384234 |
| NM_014614 | PSME4    | 459  | 538  |      | 5.64214304417 |
| NM_014614 | PSME4    | 2398 | 2537 |      | 7.96407114661 |
| NM_014614 | PSME4    | 1286 | 1384 |      | 6.64214305172 |
| NM_014614 | PSME4    | 5878 | 6027 |      | 4.64214305172 |
| NM_014614 | PSME4    | 3618 | 3721 |      | 4.64214305172 |
| NM_014614 | PSME4    | 2288 | 2360 |      | 5.64213632067 |
| NM_014614 | PSME4    | 3124 | 3235 |      | 6.64214305172 |
| NM_014614 | PSME4    | 2992 | 3110 |      | 5.64214305172 |
| NM_014614 | PSME4    | 1943 | 2009 |      | 4.6419693014  |
| NM_014613 | FAF2     | 4304 | 4351 |      | 5.36125783544 |
| NM_014613 | FAF2     | 3904 | 3966 |      | 6.94622706721 |
| NM_014613 | FAF2     | 2289 | 2369 |      | 6.94622706721 |
| NM_014613 | FAF2     | 3992 | 4070 |      | 5.36126455894 |
| NM_014613 | FAF2     | 2624 | 2700 |      | 7.36126456649 |
| NM_014613 | FAF2     | 1065 | 1138 |      | 6.36126456649 |
| NM_014613 | FAF2     | 267  | 300  |      | 5.36126433057 |
| NM_014613 | FAF2     | 372  | 434  |      | 7.36126456649 |
| NM_014613 | FAF2     | 577  | 715  |      | 8.94622706721 |
| NM_014613 | FAF2     | 2522 | 2564 |      | 5.35724696632 |
| NM_014613 | FAF2     | 2041 | 2097 |      | 6.36126433057 |
| NM_014613 | FAF2     | 2097 | 2160 |      | 6.35724696632 |
| NM_014613 | FAF2     | 2462 | 2521 |      | 6.36126456627 |
| NM_014613 | FAF2     | 1316 | 1441 |      | 7.94622706721 |
| NM_014613 | FAF2     | 727  | 882  |      | 8.94622706721 |
| NM_014613 | FAF2     | 1159 | 1247 |      | 8.36126456649 |
| NM_014613 | FAF2     | 1517 | 1556 |      | 6.36109081617 |
| NM_014613 | FAF2     | 2760 | 2840 |      | 6.36126456627 |
| NM_014613 | FAF2     | 68   | 231  |      | 8.82069618513 |
| NM_005544 | IRS1     | 752  | 796  |      | 6.44901801894 |
| NM_005544 | IRS1     | 1560 | 1651 |      | 8.45303561912 |
| NM_005544 | IRS1     | 1322 | 1358 |      | 6.45303561157 |
| NM_005544 | IRS1     | 3045 | 3096 |      | 7.4528618688  |



|           |        |      |      |               |
|-----------|--------|------|------|---------------|
| NM_005544 | IRS1   | 244  | 359  | 6.45303561912 |
| NM_005544 | IRS1   | 3758 | 3825 | 7.4530353832  |
| NM_005544 | IRS1   | 1198 | 1308 | 7.45303561912 |
| NM_005544 | IRS1   | 2743 | 2814 | 8.45302888806 |
| NM_005899 | NBR1   | 2258 | 2305 | 4.02926529252 |
| NM_005899 | NBR1   | 2080 | 2121 | 4.53008881978 |
| NM_005899 | NBR1   | 2868 | 2965 | 4.02926552089 |
| NM_005899 | NBR1   | 400  | 465  | 4.02926552089 |
| NM_005899 | NBR1   | 1116 | 1237 | 5.02926552844 |
| NM_005899 | NBR1   | 1571 | 1651 | 3.02925879739 |
| NM_005899 | NBR1   | 2534 | 2614 | 4.61405427884 |
| NM_005897 | IPP    | 619  | 713  | 11.6291076472 |
| NM_005896 | IDH1   | 1282 | 1325 | 3.23034962841 |
| NM_005896 | IDH1   | 1958 | 2036 | 5.03771128152 |
| NM_005896 | IDH1   | 1892 | 1957 | 3.23035635946 |
| NM_005896 | IDH1   | 2059 | 2105 | 2.23018260914 |
| NM_005896 | IDH1   | 1688 | 1756 | 3.81531886018 |
| NM_005896 | IDH1   | 1363 | 1541 | 6.81531886018 |
| NM_005896 | IDH1   | 2138 | 2214 | 4.81531886018 |
| NM_005896 | IDH1   | 1772 | 1849 | 5.4002813609  |
| NM_005896 | IDH1   | 2105 | 2138 | 3.81514510986 |
| NM_005896 | IDH1   | 619  | 705  | 4.55228445412 |
| NM_005896 | IDH1   | 1544 | 1629 | 4.81531886018 |
| NM_005896 | IDH1   | 2245 | 2375 | 6.31781920071 |
| NM_005896 | IDH1   | 198  | 493  | 6.23035635946 |
| NM_005896 | IDH1   | 706  | 1271 | 7.3596393764  |
| NM_005896 | IDH1   | 97   | 188  | 4.81531886018 |
| NM_005896 | IDH1   | 519  | 609  | 4.23035635946 |
| NM_005895 | GOLGA3 | 1096 | 1139 | 7.29544923414 |
| NM_005895 | GOLGA3 | 6421 | 6470 | 7.29544250308 |
| NM_005895 | GOLGA3 | 7161 | 7204 | 7.21131002475 |
| NM_005895 | GOLGA3 | 8924 | 8975 | 8.29544923414 |
| NM_005895 | GOLGA3 | 1265 | 1338 | 6.29544899822 |
| NM_005895 | GOLGA3 | 4913 | 4953 | 6.21131002475 |
| NM_005895 | GOLGA3 | 3176 | 3222 | 6.29143163396 |
| NM_005895 | GOLGA3 | 2914 | 2956 | 6.29143163396 |
| NM_005895 | GOLGA3 | 5458 | 5526 | 6.29143163396 |
| NM_005895 | GOLGA3 | 5249 | 5357 | 7.29544923414 |
| NM_005895 | GOLGA3 | 7612 | 7691 | 7.29544923414 |
| NM_005895 | GOLGA3 | 3380 | 3441 | 7.29544922659 |
| NM_005895 | GOLGA3 | 8587 | 8675 | 7.88041173485 |
| NM_005895 | GOLGA3 | 1930 | 2037 | 7.88041149894 |
| NM_005895 | GOLGA3 | 6666 | 6829 | 8.29544923414 |
| NM_005895 | GOLGA3 | 6059 | 6147 | 8.61737732902 |
| NM_005895 | GOLGA3 | 6845 | 6965 | 8.61737732902 |
| NM_005895 | GOLGA3 | 8192 | 8295 | 7.29544923414 |
| NM_005895 | GOLGA3 | 1390 | 1485 | 7.29527548382 |
| NM_005895 | GOLGA3 | 1584 | 1672 | 7.87639413468 |
| NM_005895 | GOLGA3 | 2342 | 2450 | 7.29544923414 |
| NM_005891 | ACAT2  | 1048 | 1083 | 3.34298507976 |

|           |         |      |      |               |
|-----------|---------|------|------|---------------|
| NM_005891 | ACAT2   | 529  | 591  | 4.66491318219 |
| NM_005891 | ACAT2   | 746  | 787  | 2.33896748713 |
| NM_005891 | ACAT2   | 1107 | 1157 | 4.34298508708 |
| NM_005891 | ACAT2   | 1321 | 1351 | 3.92392998785 |
| NM_005891 | ACAT2   | 1173 | 1311 | 4.66491318219 |
| NM_005891 | ACAT2   | 600  | 736  | 3.92794758803 |
| NM_005891 | ACAT2   | 415  | 508  | 4.34298508731 |
| NM_005891 | ACAT2   | 825  | 1047 | 5.66491318219 |
| NM_005891 | ACAT2   | 117  | 406  | 6.73530251008 |
| NM_001412 | EIF1AX  | 377  | 460  | 5.09986361014 |
| NM_001412 | EIF1AX  | 3498 | 3554 | 2.84579939932 |
| NM_001412 | EIF1AX  | 972  | 1043 | 1.92993187765 |
| NM_001412 | EIF1AX  | 552  | 712  | 5.25186670359 |
| NM_001412 | EIF1AX  | 214  | 367  | 3.51490110942 |
| NM_018518 | MCM10   | 902  | 969  | 6.91497772156 |
| NM_003721 | RFXANK  | 610  | 651  | 8.00716960722 |
| NM_003721 | RFXANK  | 1010 | 1084 | 9.59614970811 |
| NM_014478 | CRCP    | 1170 | 1255 | 4.80346993764 |
| NM_014478 | CRCP    | 382  | 434  | 5.79945234501 |
| NM_014473 | DIMT1   | 528  | 578  | 5.98762323596 |
| NM_014473 | DIMT1   | 270  | 316  | 6.06774484517 |
| NM_014473 | DIMT1   | 1150 | 1236 | 6.07175571429 |
| NM_014473 | DIMT1   | 816  | 871  | 5.98762323596 |
| NM_052897 | MBD6    | 3941 | 3977 | 10.5271723537 |
| NM_052897 | MBD6    | 2899 | 2939 | 9.52332850383 |
| NM_052897 | MBD6    | 3235 | 3305 | 10.5273461038 |
| NM_052897 | MBD6    | 2233 | 2322 | 10.4432068946 |
| NM_005095 | ZMYM4   | 2142 | 2188 | 6.43671176578 |
| NM_005095 | ZMYM4   | 6781 | 6817 | 6.35274630671 |
| NM_005095 | ZMYM4   | 4991 | 5040 | 6.35274630671 |
| NM_005095 | ZMYM4   | 6338 | 6412 | 6.43286791592 |
| NM_005095 | ZMYM4   | 1586 | 1633 | 6.43687878504 |
| NM_005095 | ZMYM4   | 4462 | 4578 | 8.01783041664 |
| NM_005094 | SLC27A4 | 1280 | 1343 | 9.53999441516 |
| NM_005094 | SLC27A4 | 2410 | 2485 | 8.54000113866 |
| NM_005094 | SLC27A4 | 855  | 903  | 8.54000091029 |
| NM_005094 | SLC27A4 | 1432 | 1485 | 8.54000113866 |
| NM_005094 | SLC27A4 | 322  | 417  | 9.54000114621 |
| NM_005094 | SLC27A4 | 210  | 295  | 8.54000114621 |
| NM_005094 | SLC27A4 | 1745 | 1838 | 8.54000114621 |
| NM_005094 | SLC27A4 | 1864 | 2048 | 10.1249636469 |
| NM_005094 | SLC27A4 | 2064 | 2178 | 10.1249636469 |
| NM_005094 | SLC27A4 | 513  | 621  | 10.1249636469 |
| NM_005094 | SLC27A4 | 982  | 1051 | 8.53982739589 |
| NM_005094 | SLC27A4 | 664  | 745  | 9.54000114621 |
| NM_005094 | SLC27A4 | 1119 | 1259 | 10.1249636469 |
| NM_005761 | PLXNC1  | 1121 | 1178 | 9.02692396519 |
| NM_005761 | PLXNC1  | 1951 | 1996 | 8.02692396519 |
| NM_005761 | PLXNC1  | 3072 | 3125 | 9.11106316702 |
| NM_005761 | PLXNC1  | 1523 | 1574 | 9.02692396519 |

|              |         |      |      |               |
|--------------|---------|------|------|---------------|
| NM_005761    | PLXNC1  | 2969 | 3060 | 9.69602543937 |
| NM_005761    | PLXNC1  | 3803 | 3875 | 9.1070455744  |
| NM_005761    | PLXNC1  | 1691 | 1756 | 9.1070455744  |
| NM_005761    | PLXNC1  | 1789 | 1925 | 10.4329912695 |
| NM_005761    | PLXNC1  | 3184 | 3292 | 10.4329912695 |
| NM_005761    | PLXNC1  | 1356 | 1441 | 10.1110629387 |
| NM_005760    | CEBPZ   | 2111 | 2167 | 5.2700712296  |
| NM_005760    | CEBPZ   | 516  | 576  | 4.68510199805 |
| NM_005760    | CEBPZ   | 979  | 1040 | 3.68109112893 |
| NM_005760    | CEBPZ   | 1722 | 1802 | 5.68109112893 |
| NM_005760    | CEBPZ   | 1411 | 1454 | 5.26605362965 |
| NM_005760    | CEBPZ   | 1829 | 1933 | 6.00703682399 |
| NM_005760    | CEBPZ   | 2510 | 2587 | 3.68510872155 |
| NM_005762    | TRIM28  | 458  | 514  | 5.13613972053 |
| NM_005762    | TRIM28  | 521  | 616  | 6.13613972053 |
| NM_005762    | TRIM28  | 1586 | 1932 | 8.94349464259 |
| NM_005762    | TRIM28  | 4    | 142  | 6.72110222125 |
| NM_005762    | TRIM28  | 1091 | 1560 | 9.72110222125 |
| NM_005762    | TRIM28  | 619  | 1046 | 9.83657943867 |
| NM_005762    | TRIM28  | 1937 | 2966 | 10.7211022213 |
| NM_152357    | ZNF440  | 3274 | 3332 | 9.26006984994 |
| NM_001005851 | ZNF780B | 4352 | 4388 | 7.75953484278 |
| NM_005768    | LPCAT3  | 117  | 195  | 6.62663149559 |
| NM_005768    | LPCAT3  | 2133 | 2181 | 7.21159398876 |
| NM_005768    | LPCAT3  | 842  | 916  | 7.62663149559 |
| NM_005768    | LPCAT3  | 1581 | 1611 | 6.62663148804 |
| NM_005768    | LPCAT3  | 923  | 1087 | 9.5335220912  |
| NM_005768    | LPCAT3  | 528  | 651  | 9.5335220912  |
| NM_005768    | LPCAT3  | 2239 | 2274 | 5.62261389542 |
| NM_005768    | LPCAT3  | 1661 | 1716 | 7.21158726526 |
| NM_005768    | LPCAT3  | 1157 | 1357 | 9.32707121373 |
| NM_005768    | LPCAT3  | 1904 | 1981 | 5.62663149559 |
| NM_005768    | LPCAT3  | 337  | 474  | 8.79655649703 |
| NM_005768    | LPCAT3  | 2042 | 2114 | 6.62663149559 |
| NM_005768    | LPCAT3  | 1374 | 1505 | 8.79655649703 |
| NM_176895    | PPAP2A  | 1382 | 1454 | 10.1807885096 |
| NM_176895    | PPAP2A  | 662  | 727  | 10.1807885096 |
| NM_176895    | PPAP2A  | 417  | 509  | 10.9177541038 |
| NM_176895    | PPAP2A  | 994  | 1062 | 10.1807885096 |
| NM_176895    | PPAP2A  | 804  | 892  | 10.9177541038 |
| NM_176895    | PPAP2A  | 1076 | 1292 | 12.8437535223 |
| NM_022092    | CHTF18  | 1996 | 2051 | 10.0308466504 |
| NM_033643    | RPL36   | 100  | 277  | 4.80584472892 |
| NM_033643    | RPL36   | 6    | 69   | 1.99447220669 |
| NM_033643    | RPL36   | 312  | 432  | 4.1684148083  |
| NM_001077261 | NCOR2   | 8416 | 8482 | 6.10844714506 |
| NM_001077261 | NCOR2   | 1698 | 1773 | 6.10844714483 |
| NM_033645    | FBXW11  | 1500 | 1579 | 7.97016347338 |
| NM_033645    | FBXW11  | 4152 | 4198 | 7.64823514257 |
| NM_033645    | FBXW11  | 1709 | 1794 | 8.45559030055 |

|              |          |      |      |                    |
|--------------|----------|------|------|--------------------|
| NM_033645    | FBXW11   | 2411 | 2501 | 8.81816037993      |
| NM_033645    | FBXW11   | 892  | 972  | 7.23319787921      |
| NM_033645    | FBXW11   | 472  | 572  | 7.97016347338      |
| NM_033645    | FBXW11   | 3899 | 3936 | 5.64421777832      |
| NM_033645    | FBXW11   | 2736 | 2835 | 7.23319787921      |
| NM_033645    | FBXW11   | 1439 | 1481 | 6.64806162817      |
| NM_033645    | FBXW11   | 4204 | 4262 | 7.23319787921      |
| NM_033645    | FBXW11   | 2859 | 2900 | 5.64822864744      |
| NM_033645    | FBXW11   | 3479 | 3536 | 5.64421777832      |
| NM_033645    | FBXW11   | 1371 | 1435 | 6.64822864744      |
| NM_033645    | FBXW11   | 3112 | 3170 | 5.64806162817      |
| NM_033645    | FBXW11   | 1167 | 1267 | 7.97016347338      |
| NM_033645    | FBXW11   | 379  | 456  | 7.64823537849      |
| NM_033645    | FBXW11   | 2620 | 2716 | 6.64823537849      |
| NM_033645    | FBXW11   | 3587 | 3682 | 6.64823537849      |
| NM_033645    | FBXW11   | 1842 | 1976 | 8.23319787921      |
| NM_033645    | FBXW11   | 1992 | 2077 | 8.23319787921      |
| NM_033645    | FBXW11   | 1580 | 1652 | 6.64823537094      |
| NM_033645    | FBXW11   | 4000 | 4083 | 6.64823537849      |
| NM_032902    | PPP1R16A |      | 982  | 1050 8.39192918104 |
| NM_001144877 | SCAI     | 9343 | 9423 | 10.4708932447      |
| NM_001077268 | ZFYVE19  | 462  | 510  | 6.04345275957      |
| NM_152663    | RALGPS2  | 2755 | 2800 | 4.94180334685      |
| NM_152663    | RALGPS2  | 2664 | 2706 | 5.02192495606      |
| NM_152663    | RALGPS2  | 2397 | 2475 | 5.02594255623      |
| NM_003541    | HIST1H4K |      | 280  | 322 11.0594448032  |
| NM_003541    | HIST1H4K |      | 150  | 226 10.6444073042  |
| NM_198450    | AP00L    | 3988 | 4024 | 8.99633305442      |
| NM_198450    | AP00L    | 2445 | 2488 | 8.00017690427      |
| NM_005782    | THOC4    | 27   | 80   | 5.38486917113      |
| NM_005782    | THOC4    | 565  | 664  | 5.06294107625      |
| NM_005782    | THOC4    | 282  | 554  | 7.45525849903      |
| NM_005782    | THOC4    | 816  | 1047 | 6.06294107625      |
| NM_005782    | THOC4    | 737  | 797  | 4.0629410687       |
| NM_020959    | AN08     | 319  | 417  | 11.046241042       |
| NM_020959    | AN08     | 2401 | 2470 | 10.9621018326      |
| NM_020959    | AN08     | 1473 | 1560 | 12.3681691369      |
| NM_032348    | MXRA8    | 308  | 358  | 7.51703323227      |
| NM_001040011 | SWI5     | 745  | 791  | 6.29220476478      |
| NM_001004106 | GRK6     | 1210 | 1243 | 6.44210236324      |
| NM_001004106 | GRK6     | 1596 | 1666 | 8.1111973423       |
| NM_001004106 | GRK6     | 2136 | 2199 | 6.52623484157      |
| NM_001004106 | GRK6     | 352  | 411  | 7.52222397245      |
| NM_001080496 | RGP1     | 804  | 868  | 8.59860721562      |
| NM_032607    | CREB3L3  | 944  | 997  | 6.92138879473      |
| NM_032607    | CREB3L3  | 307  | 388  | 8.92155581399      |
| NM_032607    | CREB3L3  | 98   | 235  | 7.92156254505      |
| NM_016118    | NUB1     | 1034 | 1123 | 3.73027747762      |
| NM_016118    | NUB1     | 2723 | 2810 | 5.31541372865      |
| NM_016115    | ASB3     | 1392 | 1442 | 8.51038631416      |

|           |          |      |      |               |               |
|-----------|----------|------|------|---------------|---------------|
| NM_016115 | ASB3     | 133  | 176  | 7.51423016401 |               |
| NM_000671 | ADH5     | 2230 | 2291 | 4.17838803818 |               |
| NM_000671 | ADH5     | 261  | 352  | 3.67756474684 |               |
| NM_000671 | ADH5     | 1364 | 1427 | 4.67756474684 |               |
| NM_000671 | ADH5     | 191  | 258  | 4.26252724734 |               |
| NM_000671 | ADH5     | 2103 | 2169 | 4.26252724756 |               |
| NM_000671 | ADH5     | 699  | 826  | 5.67756474684 |               |
| NM_000671 | ADH5     | 69   | 158  | 4.26252724756 |               |
| NM_000671 | ADH5     | 830  | 973  | 4.99949284173 |               |
| NM_000671 | ADH5     | 1007 | 1262 | 6.58445534245 |               |
| NM_000671 | ADH5     | 488  | 691  | 6.4849196689  |               |
| NM_016113 | TRPV2    | 484  | 505  | 7.19414501361 |               |
| NM_016111 | TEL02    | 1125 | 1194 | 8.67753396627 |               |
| NM_016111 | TEL02    | 1827 | 1885 | 7.67753396627 |               |
| NM_016111 | TEL02    | 1722 | 1780 | 7.67753396627 |               |
| NM_016111 | TEL02    | 848  | 926  | 8.68155156644 |               |
| NM_032350 | C7orf50  | 407  | 473  | 4.34977114793 |               |
| NM_015702 | MMADHC   | 1104 | 1161 | 5.65491592029 |               |
| NM_015702 | MMADHC   | 722  | 793  | 5.24005216378 |               |
| NM_015702 | MMADHC   | 531  | 609  | 5.65491592029 |               |
| NM_015702 | MMADHC   | 427  | 478  | 5.97701103444 |               |
| NM_015702 | MMADHC   | 814  | 1019 | 7.46244459266 |               |
| NM_015702 | MMADHC   | 240  | 422  | 7.82501467205 |               |
| NM_015702 | MMADHC   | 630  | 699  | 5.65508967038 |               |
| NM_015703 | RRP7A    | 1088 | 1134 | 5.14183560915 |               |
| NM_015703 | RRP7A    | 856  | 887  | 6.06171399994 |               |
| NM_015703 | RRP7A    | 550  | 602  | 6.14585320931 |               |
| NM_015703 | RRP7A    | 97   | 148  | 6.1458529734  |               |
| NM_015703 | RRP7A    | 166  | 222  | 5.1458529734  |               |
| NM_032351 | MRPL45   | 1530 | 1608 | 2.76121683626 |               |
| NM_032351 | MRPL45   | 635  | 686  | 5.08314493115 |               |
| NM_032351 | MRPL45   | 336  | 435  | 5.76121683626 |               |
| NM_032351 | MRPL45   | 989  | 1032 | 3.76104308594 |               |
| NM_032351 | MRPL45   | 187  | 261  | 4.34617933698 |               |
| NM_032351 | MRPL45   | 1324 | 1386 | 4.2620401276  |               |
| NM_032351 | MRPL45   | 689  | 784  | 4.34617933698 |               |
| NM_015704 | PPPDE2   | 1595 | 1657 | 6.8316505893  |               |
| NM_015704 | PPPDE2   | 230  | 334  | 8.4206306902  |               |
| NM_015704 | PPPDE2   | 408  | 443  | 8.33649148081 |               |
| NM_015704 | PPPDE2   | 2635 | 2672 | 6.8316505893  |               |
| NM_015704 | PPPDE2   | 506  | 670  | 10.0055931909 |               |
| NM_015705 | SGSM3    | 2275 | 2372 | 6.54916954682 |               |
| NM_015705 | SGSM3    | 2025 | 2077 | 7.46503033743 |               |
| NM_015705 | SGSM3    | 1903 | 1959 | 6.54916281576 |               |
| NM_015705 | SGSM3    | 70   | 141  | 6.54515194664 |               |
| NM_015705 | SGSM3    | 141  | 200  | 6.54916281576 |               |
| NM_138389 | FAM114A1 |      | 1648 | 1715          | 4.34566116864 |
| NM_138389 | FAM114A1 |      | 729  | 778           | 5.42979364697 |
| NM_138389 | FAM114A1 |      | 2628 | 2721          | 5.42980037802 |
| NM_138384 | MTG1     | 1199 | 1250 | 6.37170595648 |               |

|              |         |      |      |               |
|--------------|---------|------|------|---------------|
| NM_138384    | MTG1    | 880  | 943  | 4.37170596403 |
| NM_138384    | MTG1    | 770  | 847  | 5.37170596403 |
| NM_138384    | MTG1    | 199  | 255  | 4.28756675465 |
| NM_138384    | MTG1    | 639  | 739  | 6.37169923298 |
| NM_138384    | MTG1    | 1310 | 1421 | 5.95666846475 |
| NM_138387    | G6PC3   | 695  | 739  | 8.73065228256 |
| NM_138387    | G6PC3   | 1046 | 1138 | 8.73065228256 |
| NM_138387    | G6PC3   | 937  | 991  | 9.73064578742 |
| NM_138387    | G6PC3   | 1441 | 1494 | 9.73065228256 |
| NM_138387    | G6PC3   | 385  | 440  | 9.7266349183  |
| NM_138387    | G6PC3   | 1142 | 1206 | 11.9005775199 |
| NM_138387    | G6PC3   | 236  | 368  | 10.3156150192 |
| NM_138387    | G6PC3   | 763  | 863  | 10.7306525185 |
| NM_138383    | MTSS1L  | 4793 | 4863 | 3.74900807658 |
| NM_138383    | MTSS1L  | 3563 | 3673 | 6.55636299864 |
| NM_138383    | MTSS1L  | 1310 | 1359 | 3.74900784067 |
| NM_138383    | MTSS1L  | 3952 | 4035 | 6.07093617147 |
| NM_138383    | MTSS1L  | 923  | 968  | 4.74900807636 |
| NM_138383    | MTSS1L  | 3227 | 3266 | 3.74883432627 |
| NM_138383    | MTSS1L  | 3362 | 3508 | 6.74900807658 |
| NM_138383    | MTSS1L  | 4611 | 4745 | 7.83647091784 |
| NM_138383    | MTSS1L  | 1226 | 1298 | 4.74900807658 |
| NM_138383    | MTSS1L  | 1811 | 1894 | 4.74900806904 |
| NM_138383    | MTSS1L  | 4220 | 4389 | 6.33397057731 |
| NM_138383    | MTSS1L  | 541  | 713  | 5.74900807658 |
| NM_138383    | MTSS1L  | 275  | 425  | 6.33397057731 |
| NM_138383    | MTSS1L  | 1610 | 1754 | 4.74900807658 |
| NM_138383    | MTSS1L  | 2665 | 2805 | 6.07093617147 |
| NM_001002880 | CBY1    | 616  | 670  | 5.96359064555 |
| NM_015549    | PLEKHG3 | 3713 | 3759 | 8.95911857399 |
| NM_015549    | PLEKHG3 | 1623 | 1677 | 9.96296242385 |
| NM_015549    | PLEKHG3 | 4178 | 4356 | 11.7704910962 |
| NM_001018060 | AIFM3   | 2264 | 2326 | 8.57325542624 |
| NM_001735    | C5      | 1636 | 1681 | 4.95141128068 |
| NM_001735    | C5      | 576  | 685  | 5.36662253027 |
| NM_001735    | C5      | 2601 | 2681 | 3.3626049301  |
| NM_001735    | C5      | 1250 | 1326 | 4.36662252272 |
| NM_001735    | C5      | 1424 | 1470 | 3.3626049301  |
| NM_001733    | C1R     | 1731 | 1798 | 11.6459071058 |
| NM_001733    | C1R     | 1289 | 1368 | 11.0569272408 |
| NM_001733    | C1R     | 1908 | 2000 | 11.6459073417 |
| NM_001733    | C1R     | 2124 | 2184 | 11.0609446051 |
| NM_001733    | C1R     | 466  | 503  | 11.0569272408 |
| NM_001733    | C1R     | 243  | 407  | 13.2308698424 |
| NM_001733    | C1R     | 2292 | 2344 | 10.9768056316 |
| NM_001733    | C1R     | 923  | 1079 | 11.060944841  |
| NM_001730    | KLF5    | 1051 | 1078 | 9.35211598774 |
| NM_001730    | KLF5    | 928  | 1005 | 11.0212109668 |
| NM_001730    | KLF5    | 1120 | 1253 | 10.4362551971 |
| NM_001730    | KLF5    | 2890 | 2934 | 10.3521159877 |

|           |         |      |      |               |
|-----------|---------|------|------|---------------|
| NM_001731 | BTG1    | 1654 | 1696 | 5.66608725445 |
| NM_001731 | BTG1    | 425  | 486  | 4.34415915955 |
| NM_001731 | BTG1    | 942  | 1012 | 4.34415915956 |
| NM_001731 | BTG1    | 562  | 652  | 5.34415915956 |
| NM_001731 | BTG1    | 705  | 794  | 4.92912166028 |
| NM_001731 | BTG1    | 799  | 938  | 5.66608725445 |
| NM_001731 | BTG1    | 64   | 207  | 6.15151408162 |
| NM_144772 | APOA1BP | 507  | 606  | 8.68889361046 |
| NM_144772 | APOA1BP | 386  | 437  | 7.10393784078 |
| NM_144772 | APOA1BP | 930  | 970  | 8.0197986314  |
| NM_144772 | APOA1BP | 842  | 909  | 8.10393110973 |
| NM_144772 | APOA1BP | 162  | 316  | 9.91129276285 |
| NM_000060 | BTD     | 261  | 345  | 9.09971785274 |
| NM_000060 | BTD     | 841  | 896  | 8.09954410265 |
| NM_000060 | BTD     | 1192 | 1238 | 8.68468035369 |
| NM_000060 | BTD     | 1926 | 1967 | 7.09954410265 |
| NM_000060 | BTD     | 458  | 532  | 9.09971784541 |
| NM_000060 | BTD     | 1341 | 1387 | 7.09570025279 |
| NM_000060 | BTD     | 1650 | 1705 | 8.01557864358 |
| NM_000060 | BTD     | 346  | 403  | 7.09570025279 |
| NM_000060 | BTD     | 1724 | 1772 | 7.01557864358 |
| NM_000060 | BTD     | 1248 | 1332 | 8.6005411443  |
| NM_000060 | BTD     | 1553 | 1638 | 8.09954410265 |
| NM_000065 | C6      | 1666 | 1752 | 12.7465178326 |
| NM_000065 | C6      | 1587 | 1647 | 12.7465178326 |
| NM_000065 | C6      | 1926 | 1994 | 12.7463440899 |
| NM_000065 | C6      | 1188 | 1368 | 14.9164428416 |
| NM_000065 | C6      | 2477 | 2580 | 11.7463440899 |
| NM_000065 | C6      | 493  | 584  | 13.3274627407 |
| NM_000065 | C6      | 255  | 361  | 14.5538727622 |
| NM_000065 | C6      | 2120 | 2175 | 12.74250024   |
| NM_000065 | C6      | 1373 | 1445 | 11.7465178326 |
| NM_000064 | C3      | 3881 | 4904 | 6.42782628797 |
| NM_000064 | C3      | 3412 | 3878 | 5.38648549259 |
| NM_000064 | C3      | 2    | 3411 | 8.04768357914 |
| NM_000064 | C3      | 4904 | 5101 | 2.96022073789 |
| NM_144778 | MBNL2   | 4080 | 4145 | 6.95357791644 |
| NM_144778 | MBNL2   | 1164 | 1221 | 5.36860868466 |
| NM_144778 | MBNL2   | 3712 | 3788 | 7.6905435106  |
| NM_144778 | MBNL2   | 4266 | 4337 | 5.36861541572 |
| NM_144778 | MBNL2   | 517  | 602  | 6.36861541572 |
| NM_144778 | MBNL2   | 4566 | 4636 | 6.3686151798  |
| NM_144778 | MBNL2   | 2537 | 2592 | 6.94956031626 |
| NM_144778 | MBNL2   | 1319 | 1398 | 7.36861541572 |
| NM_144778 | MBNL2   | 66   | 143  | 5.3686151798  |
| NM_144778 | MBNL2   | 4413 | 4487 | 5.3686151798  |
| NM_144778 | MBNL2   | 2954 | 3004 | 6.36861540817 |
| NM_144778 | MBNL2   | 425  | 491  | 7.36861540817 |
| NM_144778 | MBNL2   | 2384 | 2432 | 6.94956031626 |
| NM_144778 | MBNL2   | 616  | 735  | 8.6905435106  |

|              |         |      |      |               |
|--------------|---------|------|------|---------------|
| NM_144778    | MBNL2   | 2708 | 2778 | 6.95357118538 |
| NM_144778    | MBNL2   | 3905 | 3990 | 5.36860868466 |
| NM_144778    | MBNL2   | 2812 | 2954 | 6.95357791644 |
| NM_144778    | MBNL2   | 2048 | 2124 | 7.36861541549 |
| NM_144778    | MBNL2   | 758  | 863  | 7.6905435106  |
| NM_144778    | MBNL2   | 1045 | 1120 | 6.36861541572 |
| NM_144778    | MBNL2   | 1928 | 2029 | 6.95357791644 |
| NM_144778    | MBNL2   | 875  | 1045 | 7.6905435106  |
| NM_144778    | MBNL2   | 273  | 396  | 7.6905435106  |
| NM_001397    | ECE1    | 5013 | 5074 | 8.41303133447 |
| NM_001397    | ECE1    | 962  | 1040 | 6.95359971584 |
| NM_001397    | ECE1    | 2197 | 2258 | 6.95359970829 |
| NM_001397    | ECE1    | 2089 | 2171 | 5.95359970829 |
| NM_001397    | ECE1    | 2825 | 2885 | 5.95359970829 |
| NM_001397    | ECE1    | 241  | 332  | 7.27552781072 |
| NM_001397    | ECE1    | 2723 | 2776 | 6.53856221656 |
| NM_001397    | ECE1    | 1041 | 1125 | 6.53856221655 |
| NM_001397    | ECE1    | 1693 | 1762 | 5.95359970829 |
| NM_001397    | ECE1    | 1240 | 1290 | 5.95359971561 |
| NM_001397    | ECE1    | 1437 | 1543 | 4.95359971584 |
| NM_001397    | ECE1    | 2279 | 2370 | 6.95359971584 |
| NM_001397    | ECE1    | 1768 | 2046 | 8.86049031144 |
| NM_001397    | ECE1    | 608  | 748  | 6.95359971584 |
| NM_001397    | ECE1    | 1575 | 1676 | 7.27552781072 |
| NM_001397    | ECE1    | 3634 | 3710 | 4.95359947992 |
| NM_001397    | ECE1    | 763  | 928  | 8.65403943398 |
| NM_001397    | ECE1    | 1334 | 1430 | 7.53856221656 |
| NM_001397    | ECE1    | 351  | 440  | 6.53856221656 |
| NM_001397    | ECE1    | 2512 | 2575 | 4.94958211566 |
| NM_021199    | SQRDL   | 1778 | 1834 | 6.91651233273 |
| NM_021199    | SQRDL   | 1444 | 1484 | 6.91634531347 |
| NM_021199    | SQRDL   | 685  | 873  | 8.91651906379 |
| NM_021199    | SQRDL   | 1374 | 1427 | 6.91634531347 |
| NM_021194    | SLC30A1 | 1104 | 1188 | 8.92913452809 |
| NM_021194    | SLC30A1 | 796  | 884  | 8.19217565743 |
| NM_021194    | SLC30A1 | 1583 | 1631 | 6.52307395488 |
| NM_014434    | NDOR1   | 1011 | 1077 | 9.51644447077 |
| NM_014434    | NDOR1   | 769  | 833  | 9.516270728   |
| NM_014434    | NDOR1   | 2726 | 2797 | 11.0973893789 |
| NM_014434    | NDOR1   | 1287 | 1346 | 9.43230526893 |
| NM_014434    | NDOR1   | 4049 | 4125 | 11.101406979  |
| NM_014434    | NDOR1   | 2918 | 3003 | 9.5164442424  |
| NM_001130475 | THAP5   | 253  | 317  | 7.94416491962 |
| NM_001130475 | THAP5   | 1913 | 1960 | 9.02428652883 |
| NM_001130475 | THAP5   | 2182 | 2238 | 9.02830412901 |
| NM_024852    | EIF2C3  | 1019 | 1082 | 8.30558566553 |
| NM_004380    | CREBBP  | 190  | 242  | 7.25213863206 |
| NM_004380    | CREBBP  | 1473 | 1503 | 6.66315853117 |
| NM_004380    | CREBBP  | 7811 | 7868 | 5.6671761238  |
| NM_004380    | CREBBP  | 2671 | 2705 | 6.58303692196 |



|              |          |      |      |               |               |
|--------------|----------|------|------|---------------|---------------|
| NM_004380    | CREBBP   | 828  | 869  | 5.66315853117 |               |
| NM_004380    | CREBBP   | 4368 | 4443 | 7.25213863206 |               |
| NM_004380    | CREBBP   | 4293 | 4366 | 6.6671761238  |               |
| NM_004380    | CREBBP   | 1875 | 1921 | 5.66315853117 |               |
| NM_004380    | CREBBP   | 4515 | 4588 | 7.25213190101 |               |
| NM_004380    | CREBBP   | 3576 | 3678 | 5.66717613135 |               |
| NM_004380    | CREBBP   | 275  | 359  | 7.66717613135 |               |
| NM_004380    | CREBBP   | 4687 | 4753 | 5.66315853117 |               |
| NM_004380    | CREBBP   | 931  | 981  | 5.66315853117 |               |
| NM_004380    | CREBBP   | 4026 | 4100 | 7.66700238103 |               |
| NM_004380    | CREBBP   | 3489 | 3576 | 5.66717613113 |               |
| NM_004383    | CSK      | 642  | 705  | 7.60262828796 |               |
| NM_004383    | CSK      | 1173 | 1216 | 5.93352657786 |               |
| NM_004383    | CSK      | 428  | 498  | 6.01364818707 |               |
| NM_004383    | CSK      | 747  | 811  | 6.0176657797  |               |
| NM_004383    | CSK      | 1598 | 1683 | 7.60262828797 |               |
| NM_004383    | CSK      | 2284 | 2331 | 7.01364818707 |               |
| NM_004383    | CSK      | 2076 | 2126 | 6.01749203693 |               |
| NM_004383    | CSK      | 1431 | 1583 | 8.60262828797 |               |
| NM_004388    | CTBS     | 227  | 275  | 6.47839055028 |               |
| NM_001141969 | DAXX     | 2390 | 2450 | 8.55528021689 |               |
| NM_001141969 | DAXX     | 1173 | 1252 | 6.97031770862 |               |
| NM_001141969 | DAXX     | 561  | 624  | 6.97031771617 |               |
| NM_001141969 | DAXX     | 2493 | 2556 | 5.97031748025 |               |
| NM_001141969 | DAXX     | 369  | 454  | 6.97031771617 |               |
| NM_001141969 | DAXX     | 2223 | 2363 | 7.55528021689 |               |
| NM_024104    | C19orf42 |      | 872  | 929           | 6.75705186375 |
| NM_024104    | C19orf42 |      | 33   | 125           | 8.75722561407 |
| NM_024104    | C19orf42 |      | 824  | 863           | 6.67308640469 |
| NM_024104    | C19orf42 |      | 335  | 389           | 8.07915347304 |
| NM_024104    | C19orf42 |      | 162  | 318           | 9.45766533221 |
| NM_024104    | C19orf42 |      | 629  | 693           | 5.75722561407 |
| NM_024105    | ALG12    | 687  | 761  | 6.37986677703 |               |
| NM_024105    | ALG12    | 1824 | 1880 | 7.37986677702 |               |
| NM_024105    | ALG12    | 784  | 849  | 9.37986677703 |               |
| NM_024105    | ALG12    | 395  | 444  | 6.37584917686 |               |
| NM_024105    | ALG12    | 516  | 643  | 9.83929839567 |               |
| NM_024105    | ALG12    | 366  | 395  | 6.29572756765 |               |
| NM_024105    | ALG12    | 851  | 958  | 9.18722169909 |               |
| NM_024105    | ALG12    | 67   | 116  | 7.37986677703 |               |
| NM_024105    | ALG12    | 171  | 277  | 8.70179487192 |               |
| NM_024105    | ALG12    | 1216 | 1335 | 9.37986677703 |               |
| NM_024105    | ALG12    | 978  | 1179 | 9.70179487192 |               |
| NM_000607    | ORM1     | 710  | 833  | 4.65162838832 |               |
| NM_000607    | ORM1     | 76   | 708  | 6.81082698317 |               |
| NM_000606    | C8G      | 78   | 147  | 9.02660153923 |               |
| NM_024100    | WDR18    | 926  | 968  | 8.19474255173 |               |
| NM_024100    | WDR18    | 1404 | 1495 | 9.7797117835  |               |
| NM_024100    | WDR18    | 51   | 118  | 7.19474904686 |               |
| NM_024100    | WDR18    | 165  | 313  | 10.3646742842 |               |

|              |          |      |      |               |               |
|--------------|----------|------|------|---------------|---------------|
| NM_024100    | WDR18    | 332  | 467  | 10.5166773777 |               |
| NM_024100    | WDR18    | 1113 | 1162 | 8.19073168261 |               |
| NM_024100    | WDR18    | 1209 | 1319 | 8.19474928278 |               |
| NM_024100    | WDR18    | 800  | 891  | 8.19474928278 |               |
| NM_024100    | WDR18    | 548  | 608  | 7.19073168261 |               |
| NM_024100    | WDR18    | 611  | 747  | 7.19474928278 |               |
| NM_024102    | WDR77    | 1809 | 1857 | 6.50631359931 |               |
| NM_024102    | WDR77    | 319  | 388  | 8.0912763284  |               |
| NM_024102    | WDR77    | 861  | 906  | 6.42217462585 |               |
| NM_024102    | WDR77    | 423  | 490  | 8.09110258563 |               |
| NM_024102    | WDR77    | 552  | 631  | 8.82824193012 |               |
| NM_024102    | WDR77    | 647  | 761  | 8.09127633595 |               |
| NM_024102    | WDR77    | 984  | 1086 | 7.50631383523 |               |
| NM_024103    | SLC25A23 |      | 1027 | 1085          | 7.40823588024 |
| NM_024103    | SLC25A23 |      | 1771 | 1858          | 7.82327338707 |
| NM_024103    | SLC25A23 |      | 1469 | 1522          | 6.82327338685 |
| NM_024103    | SLC25A23 |      | 3254 | 3323          | 7.40823588779 |
| NM_024103    | SLC25A23 |      | 1086 | 1129          | 7.40806213747 |
| NM_024103    | SLC25A23 |      | 2565 | 2646          | 5.82327337952 |
| NM_024103    | SLC25A23 |      | 1182 | 1266          | 7.82327315115 |
| NM_024103    | SLC25A23 |      | 2306 | 2411          | 6.82327338707 |
| NM_024103    | SLC25A23 |      | 568  | 671           | 8.40823588779 |
| NM_024103    | SLC25A23 |      | 178  | 267           | 6.82327338707 |
| NM_024103    | SLC25A23 |      | 430  | 565           | 8.63062830913 |
| NM_024103    | SLC25A23 |      | 2480 | 2549          | 6.8192557869  |
| NM_000608    | ORM2     | 81   | 311  | 5.72484461661 |               |
| NM_000608    | ORM2     | 314  | 838  | 7.09407842627 |               |
| NM_017643    | MBTD1    | 238  | 320  | 4.75037195457 |               |
| NM_017643    | MBTD1    | 1659 | 1714 | 4.83049356378 |               |
| NM_017645    | HAUS6    | 769  | 817  | 5.50111319861 |               |
| NM_017645    | HAUS6    | 403  | 452  | 7.001943221   |               |
| NM_017645    | HAUS6    | 3060 | 3130 | 5.50094617934 |               |
| NM_017645    | HAUS6    | 1156 | 1214 | 6.41698072028 |               |
| NM_017645    | HAUS6    | 563  | 614  | 6.49710232949 |               |
| NM_017645    | HAUS6    | 1029 | 1088 | 5.50111319861 |               |
| NM_001195100 | PTP4A2   | 1249 | 1328 | 6.02189015199 |               |
| NM_001195100 | PTP4A2   | 83   | 172  | 6.82924507427 |               |
| NM_001195100 | PTP4A2   | 2784 | 2851 | 6.02189015221 |               |
| NM_001195100 | PTP4A2   | 1    | 74   | 5.02189015221 |               |
| NM_001195100 | PTP4A2   | 2381 | 2435 | 5.60684592188 |               |
| NM_001195100 | PTP4A2   | 685  | 734  | 6.02188342116 |               |
| NM_001195100 | PTP4A2   | 576  | 681  | 5.60685265293 |               |
| NM_001195100 | PTP4A2   | 977  | 1111 | 6.3438182471  |               |
| NM_001195100 | PTP4A2   | 2689 | 2766 | 3.93775094283 |               |
| NM_001195100 | PTP4A2   | 2582 | 2642 | 5.60684592188 |               |
| NM_001195100 | PTP4A2   | 296  | 368  | 5.01787255204 |               |
| NM_017647    | FTSJ3    | 2616 | 2706 | 6.21652042619 |               |
| NM_017647    | FTSJ3    | 1780 | 1882 | 6.63155816139 |               |
| NM_017647    | FTSJ3    | 2474 | 2556 | 4.63155816139 |               |
| NM_017647    | FTSJ3    | 1463 | 1496 | 4.54741895201 |               |

|              |          |      |      |               |               |
|--------------|----------|------|------|---------------|---------------|
| NM_017647    | FTSJ3    | 3104 | 3163 | 4.63155792547 |               |
| NM_017647    | FTSJ3    | 2007 | 2064 | 4.63155792547 |               |
| NM_017647    | FTSJ3    | 1193 | 1305 | 5.63155816139 |               |
| NM_017647    | FTSJ3    | 1602 | 1656 | 4.63138441107 |               |
| NM_017647    | FTSJ3    | 646  | 703  | 4.54741895201 |               |
| NM_017647    | FTSJ3    | 737  | 813  | 6.21652066189 |               |
| NM_017647    | FTSJ3    | 2220 | 2330 | 6.21651393106 |               |
| NM_017647    | FTSJ3    | 1502 | 1602 | 6.21652066211 |               |
| NM_017647    | FTSJ3    | 1048 | 1166 | 7.63155816139 |               |
| NM_017647    | FTSJ3    | 930  | 1041 | 4.63155816139 |               |
| NM_017647    | FTSJ3    | 1311 | 1449 | 7.63155816139 |               |
| NM_017646    | TRIT1    | 1074 | 1115 | 7.43733921093 |               |
| NM_017646    | TRIT1    | 1941 | 2029 | 6.51746082014 |               |
| NM_017646    | TRIT1    | 862  | 928  | 6.52147168926 |               |
| NM_001130519 | ZNF195   | 1135 | 1186 | 7.80103511531 |               |
| NM_001130519 | ZNF195   | 657  | 698  | 7.71690263698 |               |
| NM_020457    | THAP11   | 1622 | 1706 | 8.13775512664 |               |
| NM_020457    | THAP11   | 299  | 365  | 6.05361591725 |               |
| NM_020457    | THAP11   | 1249 | 1337 | 7.72271762714 |               |
| NM_000676    | ADORA2B  | 1149 | 1254 | 10.1564337876 |               |
| NM_001002262 | ZFYVE27  | 836  | 892  | 9.27576549904 |               |
| NM_001002262 | ZFYVE27  | 431  | 537  | 8.9538374117  |               |
| NM_001002262 | ZFYVE27  | 1557 | 1592 | 6.86969820232 |               |
| NM_001002262 | ZFYVE27  | 315  | 405  | 7.9538374117  |               |
| NM_001002262 | ZFYVE27  | 722  | 828  | 8.53879991242 |               |
| NM_001002262 | ZFYVE27  | 1218 | 1317 | 8.9538374117  |               |
| NM_004763    | ITGB1BP1 |      | 868  | 923           | 2.74427104168 |
| NM_004763    | ITGB1BP1 |      | 344  | 424           | 4.40935515161 |
| NM_004763    | ITGB1BP1 |      | 728  | 785           | 2.74427104168 |
| NM_004763    | ITGB1BP1 |      | 571  | 658           | 4.41337274423 |
| NM_020186    | ACN9     | 1688 | 1755 | 5.06708899191 |               |
| NM_020186    | ACN9     | 1929 | 1967 | 5.15122147024 |               |
| NM_024816    | RABEP2   | 475  | 522  | 8.53784066109 |               |
| NM_024814    | CBLL1    | 1985 | 2040 | 7.26368990544 |               |
| NM_024814    | CBLL1    | 1574 | 1611 | 7.17955742711 |               |
| NM_024814    | CBLL1    | 1047 | 1127 | 6.6747165356  |               |
| NM_024814    | CBLL1    | 2910 | 2971 | 7.25967903632 |               |
| NM_024814    | CBLL1    | 838  | 930  | 7.26369663649 |               |
| NM_178836    | PLD6     | 1627 | 1664 | 10.2605888621 |               |
| NM_178833    | SLC9B2   | 1793 | 1837 | 5.21697404005 |               |
| NM_024818    | UBA5     | 758  | 844  | 7.24181793875 |               |
| NM_024818    | UBA5     | 2032 | 2093 | 5.83575087039 |               |
| NM_024818    | UBA5     | 1436 | 1501 | 5.91971632946 |               |
| NM_024818    | UBA5     | 1042 | 1120 | 4.91988334872 |               |
| NM_024818    | UBA5     | 431  | 480  | 4.83575087039 |               |
| NM_024818    | UBA5     | 883  | 997  | 7.72724500183 |               |
| NM_178831    | GATS     | 260  | 356  | 8.5807497239  |               |
| NM_203390    | RBM12B   | 1203 | 1290 | 9.39501713542 |               |
| NM_203390    | RBM12B   | 443  | 497  | 6.58364461319 |               |
| NM_203394    | E2F7     | 5558 | 5605 | 11.4024500285 |               |

|              |         |      |      |               |
|--------------|---------|------|------|---------------|
| NM_203394    | E2F7    | 1728 | 1780 | 11.8174875202 |
| NM_203394    | E2F7    | 2474 | 2583 | 10.8174807967 |
| NM_203394    | E2F7    | 1083 | 1185 | 11.8134699276 |
| NM_003265    | TLR3    | 2037 | 2091 | 12.1848788028 |
| NM_001042432 | CLN3    | 1865 | 1905 | 9.23372721146 |
| NM_001042432 | CLN3    | 1036 | 1099 | 9.23372721146 |
| NM_001042432 | CLN3    | 1742 | 1797 | 8.81851596187 |
| NM_001042432 | CLN3    | 1417 | 1734 | 12.7572891675 |
| NM_001042432 | CLN3    | 1165 | 1411 | 12.8484370556 |
| NM_001042432 | CLN3    | 539  | 843  | 12.1879235219 |
| NM_001042432 | CLN3    | 226  | 538  | 12.0410821335 |
| NM_001003680 | LEPR    | 3004 | 3078 | 10.9274850759 |
| NM_001003680 | LEPR    | 2956 | 2999 | 9.34252257522 |
| NM_004964    | HDAC1   | 812  | 878  | 4.76966874774 |
| NM_004964    | HDAC1   | 1766 | 1831 | 4.18470624701 |
| NM_004964    | HDAC1   | 1571 | 1624 | 4.76966874773 |
| NM_004964    | HDAC1   | 1504 | 1552 | 4.18470624679 |
| NM_004964    | HDAC1   | 1916 | 1998 | 5.76966874774 |
| NM_004964    | HDAC1   | 1699 | 1766 | 5.5066343419  |
| NM_004964    | HDAC1   | 1212 | 1335 | 5.99206116907 |
| NM_004964    | HDAC1   | 240  | 492  | 7.82856243679 |
| NM_004964    | HDAC1   | 160  | 212  | 5.76966874774 |
| NM_004964    | HDAC1   | 497  | 778  | 7.18470624702 |
| NM_004964    | HDAC1   | 892  | 1197 | 7.43263376046 |
| NM_004964    | HDAC1   | 28   | 160  | 4.76966874774 |
| NM_004965    | HMG1    | 518  | 562  | 3.18877846771 |
| NM_004965    | HMG1    | 582  | 641  | 3.27291767709 |
| NM_004965    | HMG1    | 1206 | 1295 | 4.27291767709 |
| NM_004965    | HMG1    | 715  | 787  | 5.59484577198 |
| NM_004965    | HMG1    | 1155 | 1193 | 4.26890007692 |
| NM_004965    | HMG1    | 894  | 1151 | 8.31731179645 |
| NM_015139    | SLC35D1 | 391  | 434  | 7.78088955753 |
| NM_015139    | SLC35D1 | 491  | 576  | 8.7849071577  |
| NM_015139    | SLC35D1 | 595  | 654  | 8.36986965087 |
| NM_015139    | SLC35D1 | 1423 | 1524 | 7.7849071577  |
| NM_015139    | SLC35D1 | 870  | 971  | 9.10683525259 |
| NM_015139    | SLC35D1 | 1305 | 1408 | 6.78490692178 |
| NM_015139    | SLC35D1 | 1010 | 1101 | 8.36986965087 |
| NM_004969    | IDE     | 2057 | 2121 | 8.85501808436 |
| NM_004969    | IDE     | 1267 | 1341 | 8.27005558364 |
| NM_004969    | IDE     | 345  | 385  | 7.26603798347 |
| NM_004969    | IDE     | 1082 | 1147 | 7.27005534772 |
| NM_004969    | IDE     | 2732 | 2779 | 7.26988183332 |
| NM_004969    | IDE     | 2225 | 2268 | 6.27005534772 |
| NM_004969    | IDE     | 873  | 915  | 7.85501135331 |
| NM_004969    | IDE     | 1576 | 1633 | 7.26603798347 |
| NM_004969    | IDE     | 1416 | 1489 | 8.27005558364 |
| NM_004969    | IDE     | 2880 | 2936 | 7.85501808436 |
| NM_004969    | IDE     | 1495 | 1576 | 7.85501808436 |
| NM_004969    | IDE     | 918  | 1003 | 7.85501808436 |

|              |             |      |      |               |               |
|--------------|-------------|------|------|---------------|---------------|
| NM_004969    | IDE         | 2491 | 2538 | 8.59198367852 |               |
| NM_004969    | IDE         | 2289 | 2346 | 7.85484433405 |               |
| NM_004969    | IDE         | 1664 | 1702 | 7.27004885259 |               |
| NM_004969    | IDE         | 2133 | 2221 | 9.0774105057  |               |
| NM_004969    | IDE         | 1147 | 1242 | 7.85501808436 |               |
| NM_004969    | IDE         | 735  | 869  | 8.85501808436 |               |
| NM_004969    | IDE         | 2548 | 2629 | 7.27005558342 |               |
| NM_004969    | IDE         | 3041 | 3159 | 8.27005558364 |               |
| NM_004969    | IDE         | 1772 | 1879 | 7.85501808436 |               |
| NM_017727    | TMEM214     | 1034 | 1116 | 7.61017013914 |               |
| NM_017727    | TMEM214     | 961  | 1023 | 7.61017013914 |               |
| NM_017727    | TMEM214     | 763  | 793  | 4.94106842903 |               |
| NM_017727    | TMEM214     | 1535 | 1625 | 7.61017013914 |               |
| NM_017727    | TMEM214     | 1636 | 1688 | 7.02520763842 |               |
| NM_017727    | TMEM214     | 1478 | 1528 | 5.0250338881  |               |
| NM_017727    | TMEM214     | 1903 | 1971 | 6.02119003825 |               |
| NM_017727    | TMEM214     | 482  | 546  | 6.02520090737 |               |
| NM_017727    | TMEM214     | 1743 | 1775 | 5.0250338881  |               |
| NM_017727    | TMEM214     | 2857 | 2924 | 6.61017013914 |               |
| NM_017727    | TMEM214     | 202  | 277  | 6.61017013914 |               |
| NM_017727    | TMEM214     | 656  | 742  | 6.02520763842 |               |
| NM_017727    | TMEM214     | 2968 | 3032 | 5.02119003825 |               |
| NM_017727    | TMEM214     | 1122 | 1302 | 8.48463925706 |               |
| NM_017727    | TMEM214     | 877  | 944  | 5.02119003825 |               |
| NM_017727    | TMEM214     | 2093 | 2180 | 7.02520763842 |               |
| NM_017727    | TMEM214     | 2427 | 2604 | 7.02520763842 |               |
| NM_017727    | TMEM214     | 2325 | 2410 | 6.02520763842 |               |
| NM_017727    | TMEM214     | 2215 | 2310 | 5.02520763842 |               |
| NM_145649    | GCNT2       | 367  | 475  | 7.92961593141 |               |
| NM_145649    | GCNT2       | 1940 | 2001 | 7.92559833124 |               |
| NM_145649    | GCNT2       | 4063 | 4126 | 6.92961592386 |               |
| NM_145649    | GCNT2       | 532  | 565  | 6.92559833124 |               |
| NM_145649    | GCNT2       | 2749 | 2802 | 7.84547672203 |               |
| NM_145649    | GCNT2       | 4251 | 4307 | 6.92559833124 |               |
| NM_145649    | GCNT2       | 851  | 946  | 8.51457843213 |               |
| NM_145648    | SLC15A4     | 1433 | 1483 | 9.29469969828 |               |
| NM_145648    | SLC15A4     | 2537 | 2611 | 9.29487344859 |               |
| NM_145648    | SLC15A4     | 2075 | 2136 | 7.70589334771 |               |
| NM_145648    | SLC15A4     | 2666 | 2719 | 8.70991094033 |               |
| NM_145648    | SLC15A4     | 277  | 334  | 7.70973719756 |               |
| NM_145648    | SLC15A4     | 1794 | 1946 | 11.410350666  |               |
| NM_145648    | SLC15A4     | 1505 | 1755 | 12.7099109479 |               |
| NM_145648    | SLC15A4     | 648  | 886  | 12.1693425665 |               |
| NM_145648    | SLC15A4     | 174  | 251  | 10.0318390428 |               |
| NM_145648    | SLC15A4     | 1994 | 2069 | 10.0318390428 |               |
| NM_145648    | SLC15A4     | 889  | 1083 | 12.1022283707 |               |
| NM_145648    | SLC15A4     | 1095 | 1413 | 12.2334729039 |               |
| NM_001202559 | CHURC1-FNTB |      | 119  | 174           | 7.08223068899 |
| NM_001202559 | CHURC1-FNTB |      | 175  | 232           | 7.58140716173 |
| NM_006031    | PCNT        | 1287 | 1343 | 6.89390121914 |               |

|           |          |      |      |               |               |
|-----------|----------|------|------|---------------|---------------|
| NM_006031 | PCNT     | 370  | 450  | 6.89389472401 |               |
| NM_006031 | PCNT     | 9070 | 9123 | 6.88988385489 |               |
| NM_006031 | PCNT     | 6731 | 6791 | 8.47484635561 |               |
| NM_006031 | PCNT     | 3682 | 3803 | 9.21582954994 |               |
| NM_006035 | CDC42BPB |      | 1074 | 1128          | 4.46149751937 |
| NM_006035 | CDC42BPB |      | 5197 | 5302          | 5.54563672875 |
| NM_006035 | CDC42BPB |      | 1000 | 1049          | 6.13059249842 |
| NM_006035 | CDC42BPB |      | 4518 | 4583          | 6.13059249842 |
| NM_006035 | CDC42BPB |      | 4041 | 4088          | 6.13059249842 |
| NM_006035 | CDC42BPB |      | 5453 | 5501          | 4.46149751937 |
| NM_006035 | CDC42BPB |      | 3584 | 3647          | 6.1305922193  |
| NM_006035 | CDC42BPB |      | 864  | 908           | 6.04646002009 |
| NM_006035 | CDC42BPB |      | 3092 | 3148          | 5.5456367212  |
| NM_006035 | CDC42BPB |      | 1137 | 1234          | 5.5456299977  |
| NM_017723 | C9orf167 |      | 484  | 604           | 10.8273879425 |
| NM_017723 | C9orf167 |      | 1879 | 1920          | 10.090248598  |
| NM_017723 | C9orf167 |      | 55   | 87            | 8.42132063823 |
| NM_017723 | C9orf167 |      | 3535 | 3607          | 8.50545984761 |
| NM_017723 | C9orf167 |      | 3629 | 3747          | 11.0904223483 |
| NM_017723 | C9orf167 |      | 618  | 687           | 9.5054596117  |
| NM_017723 | C9orf167 |      | 1372 | 1457          | 8.5052860973  |
| NM_017723 | C9orf167 |      | 3792 | 3882          | 10.8273879425 |
| NM_017723 | C9orf167 |      | 889  | 967           | 9.50545984762 |
| NM_006527 | SLBP     | 20   | 85   | 5.92883577996 |               |
| NM_006527 | SLBP     | 1469 | 1581 | 6.34387327924 |               |
| NM_006527 | SLBP     | 993  | 1047 | 7.15122820129 |               |
| NM_006527 | SLBP     | 713  | 786  | 4.33985567906 |               |
| NM_006527 | SLBP     | 1252 | 1306 | 5.92883577996 |               |
| NM_006527 | SLBP     | 790  | 884  | 7.34387327924 |               |
| NM_006527 | SLBP     | 262  | 398  | 6.66580137412 |               |
| NM_006527 | SLBP     | 185  | 248  | 5.34387327923 |               |
| NM_006527 | SLBP     | 1364 | 1449 | 6.66580137412 |               |
| NM_006527 | SLBP     | 448  | 713  | 8.86743523529 |               |
| NM_003004 | SECTM1   | 1824 | 1872 | 8.64363371256 |               |
| NM_003004 | SECTM1   | 515  | 593  | 9.64363394848 |               |
| NM_003004 | SECTM1   | 430  | 500  | 8.64362721743 |               |
| NM_003004 | SECTM1   | 352  | 386  | 8.63961634831 |               |
| NM_003004 | SECTM1   | 857  | 922  | 10.4509888705 |               |
| NM_003004 | SECTM1   | 925  | 1045 | 8.64363394826 |               |
| NM_153182 | MINA     | 1399 | 1449 | 5.26857642819 |               |
| NM_153182 | MINA     | 569  | 620  | 6.18845481898 |               |
| NM_003002 | SDHD     | 1050 | 1121 | 6.64291436917 |               |
| NM_003002 | SDHD     | 59   | 218  | 9.10636358798 |               |
| NM_003002 | SDHD     | 225  | 631  | 10.6011282797 |               |
| NM_003002 | SDHD     | 727  | 801  | 7.64675821902 |               |
| NM_017720 | STAP2    | 968  | 1093 | 8.47147670182 |               |
| NM_017720 | STAP2    | 726  | 884  | 9.31947360838 |               |
| NM_017720 | STAP2    | 1365 | 1448 | 7.14954860694 |               |
| NM_017720 | STAP2    | 383  | 484  | 8.14954860694 |               |
| NM_017720 | STAP2    | 200  | 297  | 8.95690352899 |               |

|              |        |      |      |               |
|--------------|--------|------|------|---------------|
| NM_006520    | DYNLT3 | 403  | 452  | 8.37787063844 |
| NM_003001    | SDHC   | 277  | 367  | 9.73848701968 |
| NM_003001    | SDHC   | 1118 | 1177 | 8.56856201824 |
| NM_003001    | SDHC   | 563  | 634  | 8.89049011313 |
| NM_003001    | SDHC   | 933  | 1008 | 7.56856201802 |
| NM_003001    | SDHC   | 635  | 725  | 8.89049011313 |
| NM_003001    | SDHC   | 377  | 527  | 10.0279936369 |
| NM_003001    | SDHC   | 126  | 199  | 8.89049011313 |
| NM_003001    | SDHC   | 31   | 106  | 7.56856201802 |
| NM_003001    | SDHC   | 786  | 895  | 7.56856201824 |
| NM_003001    | SDHC   | 1183 | 1309 | 8.89049011313 |
| NM_153188    | TNP01  | 520  | 597  | 7.9765117805  |
| NM_153188    | TNP01  | 3326 | 3372 | 5.16513925827 |
| NM_153188    | TNP01  | 4155 | 4201 | 6.16915012739 |
| NM_153188    | TNP01  | 5522 | 5579 | 5.16915662252 |
| NM_153188    | TNP01  | 1171 | 1249 | 7.16915685844 |
| NM_153188    | TNP01  | 2869 | 2910 | 6.08501764906 |
| NM_153188    | TNP01  | 723  | 798  | 6.75411935916 |
| NM_153188    | TNP01  | 1855 | 1992 | 8.33908185988 |
| NM_153188    | TNP01  | 4021 | 4074 | 6.75411935161 |
| NM_153188    | TNP01  | 8390 | 8480 | 6.16915685844 |
| NM_153188    | TNP01  | 3741 | 3787 | 6.08501764906 |
| NM_153188    | TNP01  | 1251 | 1371 | 9.16915685844 |
| NM_153188    | TNP01  | 4946 | 4981 | 6.16513925827 |
| NM_153188    | TNP01  | 2673 | 2810 | 7.75411935916 |
| NM_153188    | TNP01  | 439  | 520  | 7.16915685844 |
| NM_153188    | TNP01  | 3591 | 3633 | 5.16898310812 |
| NM_153188    | TNP01  | 1716 | 1775 | 6.16915662252 |
| NM_153188    | TNP01  | 4996 | 5099 | 6.75411935894 |
| NM_153188    | TNP01  | 3120 | 3163 | 7.16898310812 |
| NM_153188    | TNP01  | 1045 | 1155 | 6.75411935916 |
| NM_153188    | TNP01  | 2532 | 2568 | 6.66998014978 |
| NM_153188    | TNP01  | 924  | 1020 | 7.49108495333 |
| NM_153188    | TNP01  | 2393 | 2503 | 7.49108495333 |
| NM_153188    | TNP01  | 2996 | 3089 | 6.16915685844 |
| NM_153188    | TNP01  | 6710 | 6735 | 6.16513925827 |
| NM_153188    | TNP01  | 599  | 717  | 7.49108495333 |
| NM_153188    | TNP01  | 1379 | 1617 | 8.62858847708 |
| NM_153188    | TNP01  | 1790 | 1829 | 6.16915685089 |
| NM_153188    | TNP01  | 1680 | 1708 | 6.08501764906 |
| NM_153188    | TNP01  | 6146 | 6239 | 6.16915685844 |
| NM_153188    | TNP01  | 3855 | 3928 | 6.16915685089 |
| NM_153188    | TNP01  | 8161 | 8378 | 8.33908185988 |
| NM_153188    | TNP01  | 1993 | 2173 | 8.86959657658 |
| NM_153188    | TNP01  | 5610 | 5690 | 6.75411935894 |
| NM_153188    | TNP01  | 806  | 923  | 7.49108495333 |
| NM_153188    | TNP01  | 4092 | 4146 | 5.16513925827 |
| NM_153188    | TNP01  | 229  | 311  | 6.16915685844 |
| NM_153188    | TNP01  | 5208 | 5279 | 6.16513925827 |
| NM_001206647 | AKIP1  | 72   | 150  | 8.50205331848 |

|              |          |      |      |               |               |
|--------------|----------|------|------|---------------|---------------|
| NM_001206647 | AKIP1    | 798  | 861  | 8.50607091866 |               |
| NM_001206647 | AKIP1    | 439  | 486  | 9.42193170927 |               |
| NM_001206641 | C1orf31  | 138  | 177  | 7.45697466966 |               |
| NM_001206641 | C1orf31  | 507  | 553  | 6.78804670987 |               |
| NM_001206641 | C1orf31  | 411  | 506  | 7.87218591926 |               |
| NM_001206641 | C1orf31  | 178  | 225  | 7.45714841997 |               |
| NM_001127213 | LY6E     | 271  | 374  | 6.11160112717 |               |
| NM_001127211 | KIAA1598 |      | 3830 | 3920          | 4.78891168053 |
| NM_001127211 | KIAA1598 |      | 3688 | 3750          | 7.11084001133 |
| NM_001127211 | KIAA1598 |      | 3094 | 3138          | 4.78489431627 |
| NM_001127211 | KIAA1598 |      | 3494 | 3637          | 5.78891191645 |
| NM_001127211 | KIAA1598 |      | 2845 | 3003          | 6.78891191645 |
| NM_001127211 | KIAA1598 |      | 2792 | 2844          | 6.37370066685 |
| NM_001127211 | KIAA1598 |      | 2454 | 2523          | 4.78873816613 |
| NM_032477    | MRPL41   | 306  | 356  | 3.84406799413 |               |
| NM_032477    | MRPL41   | 235  | 298  | 6.43304809503 |               |
| NM_032477    | MRPL41   | 415  | 477  | 3.84808535839 |               |
| NM_032476    | MRPS6    | 652  | 691  | 5.58891605086 |               |
| NM_032476    | MRPS6    | 211  | 344  | 7.17789615176 |               |
| NM_032472    | PPIL3    | 178  | 271  | 5.61074307377 |               |
| NM_032479    | MRPL36   | 246  | 309  | 4.67171464263 |               |
| NM_032479    | MRPL36   | 68   | 147  | 6.2566771509  |               |
| NM_032479    | MRPL36   | 152  | 226  | 4.67171465017 |               |
| NM_032479    | MRPL36   | 314  | 389  | 4.08675214191 |               |
| NM_032478    | MRPL38   | 335  | 412  | 4.78627384897 |               |
| NM_032478    | MRPL38   | 748  | 795  | 4.78627384897 |               |
| NM_032478    | MRPL38   | 1020 | 1085 | 6.7862738492  |               |
| NM_032478    | MRPL38   | 664  | 717  | 4.78225624902 |               |
| NM_032478    | MRPL38   | 1099 | 1168 | 4.78225624902 |               |
| NM_001037813 | ZNF284   | 2100 | 2165 | 10.7274718787 |               |
| NM_001037813 | ZNF284   | 104  | 197  | 11.3965733529 |               |
| NM_001037811 | HSD17B10 |      | 199  | 263           | 7.85930124434 |
| NM_001037811 | HSD17B10 |      | 264  | 296           | 6.2741649933  |
| NM_001037811 | HSD17B10 |      | 567  | 600           | 6.27032114344 |
| NM_001037811 | HSD17B10 |      | 670  | 802           | 8.27433874361 |
| NM_007106    | UBL3     | 951  | 1045 | 7.24219839906 |               |
| NM_007106    | UBL3     | 843  | 920  | 6.24219167556 |               |
| NM_007106    | UBL3     | 3285 | 3373 | 8.24219839906 |               |
| NM_013398    | ZNF224   | 412  | 465  | 9.12610537093 |               |
| NM_013393    | FTSJ2    | 1550 | 1590 | 6.93313453524 |               |
| NM_013393    | FTSJ2    | 1398 | 1448 | 9.01726701357 |               |
| NM_013393    | FTSJ2    | 535  | 584  | 7.01325614445 |               |
| NM_013393    | FTSJ2    | 95   | 177  | 8.01727374463 |               |
| NM_013393    | FTSJ2    | 458  | 518  | 7.01727373708 |               |
| NM_013393    | FTSJ2    | 791  | 902  | 7.01727374463 |               |
| NM_013393    | FTSJ2    | 627  | 694  | 8.60223624512 |               |
| NM_013393    | FTSJ2    | 339  | 440  | 9.01727374463 |               |
| NM_013392    | NRBP1    | 742  | 833  | 3.50996500974 |               |
| NM_013392    | NRBP1    | 1918 | 1984 | 2.18803691463 |               |
| NM_013392    | NRBP1    | 931  | 958  | 2.68886020619 |               |



|              |          |      |      |               |               |
|--------------|----------|------|------|---------------|---------------|
| NM_013392    | NRBP1    | 1716 | 1778 | 1.18401931468 |               |
| NM_013392    | NRBP1    | 291  | 362  | 2.1880369073  |               |
| NM_013392    | NRBP1    | 1227 | 1337 | 2.18803691485 |               |
| NM_013392    | NRBP1    | 1531 | 1627 | 2.77299917965 |               |
| NM_001242393 | ACSS2    | 1570 | 1635 | 4.38343040342 |               |
| NM_001242393 | ACSS2    | 1149 | 1207 | 5.38343016751 |               |
| NM_001242393 | ACSS2    | 557  | 631  | 5.9683928966  |               |
| NM_001242393 | ACSS2    | 2498 | 2582 | 5.38343039587 |               |
| NM_013396    | USP25    | 3671 | 3757 | 5.86686568678 |               |
| NM_000437    | PAFAH2   | 1488 | 1531 | 8.13279421956 |               |
| NM_018161    | NADSYN1  | 2090 | 2154 | 6.30476023585 |               |
| NM_018164    | C12orf11 |      | 677  | 742           | 7.10332676555 |
| NM_018164    | C12orf11 |      | 1036 | 1101          | 6.01918755618 |
| NM_018164    | C12orf11 |      | 1685 | 1728          | 5.09930916539 |
| NM_018164    | C12orf11 |      | 756  | 816           | 7.10332003451 |
| NM_018166    | FAM176B  | 499  | 576  | 10.0536865696 |               |
| NM_018169    | C12orf35 |      | 223  | 270           | 6.07722684135 |
| NM_002359    | MAFG     | 1784 | 1838 | 5.49218064713 |               |
| NM_002359    | MAFG     | 3102 | 3163 | 5.49218065468 |               |
| NM_002359    | MAFG     | 2008 | 2088 | 6.48816305451 |               |
| NM_002359    | MAFG     | 3530 | 3611 | 6.49218065468 |               |
| NM_002359    | MAFG     | 4202 | 4246 | 6.4080414453  |               |
| NM_002359    | MAFG     | 4078 | 4124 | 6.49217392363 |               |
| NM_002359    | MAFG     | 1937 | 1997 | 7.81410874957 |               |
| NM_002359    | MAFG     | 4508 | 4559 | 5.4080414453  |               |
| NM_002359    | MAFG     | 3356 | 3412 | 5.49200690436 |               |
| NM_002359    | MAFG     | 3912 | 3965 | 7.07312555523 |               |
| NM_002359    | MAFG     | 844  | 935  | 5.49218064713 |               |
| NM_002358    | MAD2L1   | 851  | 891  | 7.00515637507 |               |
| NM_002358    | MAD2L1   | 1305 | 1375 | 6.26819054499 |               |
| NM_002358    | MAD2L1   | 761  | 798  | 4.59908907081 |               |
| NM_002358    | MAD2L1   | 359  | 466  | 6.68322828019 |               |
| NM_002358    | MAD2L1   | 233  | 358  | 7.26819078091 |               |
| NM_002358    | MAD2L1   | 542  | 631  | 6.26819078091 |               |
| NM_002350    | LYN      | 763  | 822  | 10.1024726844 |               |
| NM_002350    | LYN      | 2923 | 2993 | 11.0984618153 |               |
| NM_002350    | LYN      | 1544 | 1596 | 12.1024794152 |               |
| NM_002350    | LYN      | 1659 | 1735 | 12.1024726844 |               |
| NM_002350    | LYN      | 279  | 345  | 10.0984618153 |               |
| NM_002350    | LYN      | 2652 | 2687 | 11.0984618153 |               |
| NM_002350    | LYN      | 1396 | 1466 | 11.683424316  |               |
| NM_002355    | M6PR     | 1235 | 1310 | 8.36981540631 |               |
| NM_002355    | M6PR     | 1985 | 2042 | 6.04788731143 |               |
| NM_002355    | M6PR     | 2307 | 2410 | 6.04788731143 |               |
| NM_002355    | M6PR     | 1157 | 1231 | 6.63284981215 |               |
| NM_002355    | M6PR     | 137  | 187  | 5.04788058037 |               |
| NM_002355    | M6PR     | 1901 | 1969 | 6.63284981215 |               |
| NM_002355    | M6PR     | 2047 | 2166 | 6.04788731143 |               |
| NM_002355    | M6PR     | 220  | 491  | 10.3698154063 |               |
| NM_002355    | M6PR     | 1517 | 1716 | 8.50731893006 |               |

|              |          |      |      |                   |
|--------------|----------|------|------|-------------------|
| NM_002355    | M6PR     | 1379 | 1495 | 5.04788731143     |
| NM_002355    | M6PR     | 2173 | 2305 | 8.04788731143     |
| NM_002355    | M6PR     | 840  | 1151 | 10.2178123129     |
| NM_002355    | M6PR     | 1718 | 1889 | 8.04788731143     |
| NM_002355    | M6PR     | 497  | 838  | 9.85524223348     |
| NM_002354    | EPCAM    | 257  | 299  | 2.26129155724     |
| NM_002354    | EPCAM    | 173  | 255  | 3.58321965967     |
| NM_002354    | EPCAM    | 1586 | 1670 | 3.58321965967     |
| NM_002354    | EPCAM    | 687  | 1574 | 8.91234325596     |
| NM_002354    | EPCAM    | 324  | 683  | 7.14393461415     |
| NM_002605    | PDE8A    | 1176 | 1216 | 6.89815477901     |
| NM_002605    | PDE8A    | 1746 | 1799 | 5.89815477901     |
| NM_002605    | PDE8A    | 340  | 399  | 5.90199862886     |
| NM_002605    | PDE8A    | 2602 | 2682 | 7.4871348799      |
| NM_002605    | PDE8A    | 645  | 684  | 7.40299567052     |
| NM_002605    | PDE8A    | 3377 | 3445 | 7.48696112958     |
| NM_002605    | PDE8A    | 3545 | 3652 | 6.90217237918     |
| NM_002356    | MARCKS   | 2307 | 2377 | 9.62609282126     |
| NM_002356    | MARCKS   | 41   | 266  | 12.8224900341     |
| NM_002356    | MARCKS   | 276  | 395  | 10.5005619392     |
| NM_002356    | MARCKS   | 2145 | 2216 | 8.04113032053     |
| NM_002356    | MARCKS   | 1677 | 1762 | 8.04113032053     |
| NM_002356    | MARCKS   | 2440 | 2549 | 10.0411303205     |
| NM_002356    | MARCKS   | 1405 | 1510 | 10.0411303205     |
| NM_002356    | MARCKS   | 2219 | 2307 | 9.04113032053     |
| NM_002356    | MARCKS   | 449  | 574  | 9.04113032053     |
| NM_002356    | MARCKS   | 887  | 969  | 7.04113032031     |
| NM_002356    | MARCKS   | 2008 | 2133 | 9.36305841542     |
| NM_002356    | MARCKS   | 1581 | 1673 | 9.36305841542     |
| NM_001039887 | C19orf55 |      | 603  | 675 12.8574852522 |
| NM_001039886 | ZNF808   | 2507 | 2549 | 11.0287548939     |
| NM_006067    | COX4NB   | 786  | 837  | 5.99948583995     |
| NM_006067    | COX4NB   | 928  | 991  | 7.0035034399      |
| NM_006067    | COX4NB   | 1294 | 1358 | 4.91936423074     |
| NM_006067    | COX4NB   | 1024 | 1117 | 5.00349670907     |
| NM_014287    | NOM01    | 2473 | 2566 | 5.57038135036     |
| NM_014287    | NOM01    | 2253 | 2468 | 7.66991702391     |
| NM_014287    | NOM01    | 119  | 652  | 8.87155088508     |
| NM_014287    | NOM01    | 3798 | 4202 | 8.59591644247     |
| NM_014287    | NOM01    | 2735 | 2963 | 7.62100742343     |
| NM_014287    | NOM01    | 2992 | 3645 | 9.20596992415     |
| NM_014287    | NOM01    | 657  | 845  | 7.28658838436     |
| NM_014287    | NOM01    | 2566 | 2734 | 6.46346614644     |
| NM_014287    | NOM01    | 848  | 1319 | 8.69376376586     |
| NM_014287    | NOM01    | 3649 | 3757 | 2.7630264283      |
| NM_014287    | NOM01    | 1322 | 2191 | 9.8183088638      |
| NM_014280    | DNAJC8   | 251  | 292  | 3.9510818327      |
| NM_014281    | PUF60    | 494  | 561  | 6.4748663636      |
| NM_014281    | PUF60    | 579  | 645  | 6.47486612768     |
| NM_014281    | PUF60    | 1446 | 1494 | 5.88973011256     |

|              |         |      |      |               |
|--------------|---------|------|------|---------------|
| NM_014281    | PUF60   | 872  | 915  | 5.88973011256 |
| NM_014281    | PUF60   | 396  | 447  | 4.80576465349 |
| NM_014281    | PUF60   | 206  | 228  | 4.80576465349 |
| NM_014281    | PUF60   | 1279 | 1339 | 4.8858862627  |
| NM_014281    | PUF60   | 1050 | 1112 | 5.88989713182 |
| NM_014281    | PUF60   | 674  | 801  | 6.88990386288 |
| NM_014281    | PUF60   | 1380 | 1443 | 6.47084876343 |
| NM_014281    | PUF60   | 1652 | 1761 | 8.34933548151 |
| NM_014281    | PUF60   | 1523 | 1626 | 5.88990386288 |
| NM_005956    | MTHFD1  | 1549 | 1592 | 5.90015569178 |
| NM_005956    | MTHFD1  | 507  | 581  | 5.980277301   |
| NM_005956    | MTHFD1  | 2325 | 2435 | 7.20668732251 |
| NM_005956    | MTHFD1  | 2200 | 2267 | 5.39915865013 |
| NM_005956    | MTHFD1  | 597  | 711  | 6.39933240045 |
| NM_005956    | MTHFD1  | 1427 | 1542 | 6.98429490117 |
| NM_005956    | MTHFD1  | 1742 | 1877 | 7.72126049533 |
| NM_005956    | MTHFD1  | 1885 | 2147 | 7.98429490117 |
| NM_005956    | MTHFD1  | 2820 | 2933 | 6.98429490117 |
| NM_005956    | MTHFD1  | 1323 | 1426 | 6.72126049533 |
| NM_005956    | MTHFD1  | 3212 | 3355 | 6.98429490117 |
| NM_005956    | MTHFD1  | 734  | 881  | 6.98429490117 |
| NM_005956    | MTHFD1  | 2437 | 2695 | 7.56925740189 |
| NM_005956    | MTHFD1  | 432  | 493  | 5.39531480027 |
| NM_005956    | MTHFD1  | 886  | 958  | 5.98429466525 |
| NM_005956    | MTHFD1  | 3048 | 3172 | 4.39933240045 |
| NM_005957    | MTHFR   | 1066 | 1106 | 9.87063944095 |
| NM_000435    | NOTCH3  | 3293 | 3332 | 13.8624921655 |
| NM_000435    | NOTCH3  | 1911 | 1978 | 14.8624921655 |
| NM_014288    | ITGB3BP | 926  | 984  | 6.90452964016 |
| NM_018706    | DHTKD1  | 326  | 395  | 6.81611260159 |
| NM_018703    | RBBP6   | 1187 | 1247 | 5.89977670339 |
| NM_018703    | RBBP6   | 1280 | 1332 | 4.31464068827 |
| NM_018703    | RBBP6   | 1889 | 1953 | 4.31464068827 |
| NM_018703    | RBBP6   | 2226 | 2280 | 5.31481420267 |
| NM_018703    | RBBP6   | 1040 | 1130 | 5.31481443104 |
| NM_018703    | RBBP6   | 1340 | 1417 | 5.31481443858 |
| NM_018703    | RBBP6   | 3042 | 3102 | 5.31481420267 |
| NM_018703    | RBBP6   | 770  | 807  | 5.89960318899 |
| NM_018703    | RBBP6   | 2518 | 2576 | 5.31079683841 |
| NM_018703    | RBBP6   | 674  | 736  | 5.31481443858 |
| NM_018703    | RBBP6   | 814  | 974  | 7.12216936064 |
| NM_018703    | RBBP6   | 5048 | 5148 | 4.31481443836 |
| NM_018703    | RBBP6   | 2081 | 2213 | 5.89977693931 |
| NM_018703    | RBBP6   | 2611 | 2721 | 5.89977693931 |
| NM_001077690 | ALG9    | 856  | 934  | 10.0595234266 |
| NM_001077690 | ALG9    | 963  | 1014 | 9.05934967627 |
| NM_001077690 | ALG9    | 1229 | 1273 | 10.0595234266 |
| NM_001077690 | ALG9    | 1644 | 1682 | 7.97538421721 |
| NM_001077690 | ALG9    | 498  | 568  | 9.05952342659 |
| NM_001077690 | ALG9    | 1291 | 1417 | 10.6444859273 |

|              |         |      |      |               |
|--------------|---------|------|------|---------------|
| NM_001077690 | ALG9    | 622  | 762  | 10.8668783486 |
| NM_001077690 | ALG9    | 316  | 407  | 8.05951669554 |
| NM_001077690 | ALG9    | 3766 | 3832 | 9.05952319067 |
| NM_018708    | FEM1A   | 1044 | 1092 | 11.072863977  |
| NM_018708    | FEM1A   | 2735 | 2780 | 9.40376226685 |
| NM_018708    | FEM1A   | 2884 | 2963 | 10.4879014762 |
| NM_018708    | FEM1A   | 1331 | 1430 | 11.072863977  |
| NM_018708    | FEM1A   | 2515 | 2596 | 11.0688463768 |
| NM_018708    | FEM1A   | 2787 | 2878 | 10.4879014762 |
| NM_033257    | DGCR6L  | 621  | 660  | 6.58462888549 |
| NM_018094    | GSPT2   | 1563 | 1596 | 12.659787994  |
| NM_018094    | GSPT2   | 612  | 661  | 12.6597879865 |
| NM_018094    | GSPT2   | 1695 | 1737 | 11.5756487846 |
| NM_018094    | GSPT2   | 1987 | 2027 | 11.5756487846 |
| NM_014366    | GNL3    | 1106 | 1169 | 3.24639714412 |
| NM_014366    | GNL3    | 1776 | 1856 | 2.24639715145 |
| NM_014366    | GNL3    | 1233 | 1285 | 2.74722044301 |
| NM_014366    | GNL3    | 552  | 603  | 2.74722044301 |
| NM_014366    | GNL3    | 1858 | 1923 | 2.24639715167 |
| NM_014366    | GNL3    | 1334 | 1364 | 1.2423795515  |
| NM_014366    | GNL3    | 1383 | 1481 | 3.83135965239 |
| NM_005655    | KLF10   | 610  | 667  | 5.99798294003 |
| NM_018471    | ZC3H15  | 1739 | 1786 | 1.11615929651 |
| NM_018471    | ZC3H15  | 668  | 744  | 1.11615929651 |
| NM_018471    | ZC3H15  | 1325 | 1381 | 2.12017016563 |
| NM_018471    | ZC3H15  | 1587 | 1687 | 3.7051393974  |
| NM_001032999 | CBFA2T2 | 2173 | 2212 | 5.12629988038 |
| NM_001032999 | CBFA2T2 | 2458 | 2538 | 5.12629988038 |
| NM_152299    | NCAPH2  | 1285 | 1335 | 6.4767337204  |
| NM_152299    | NCAPH2  | 467  | 540  | 9.06169622135 |
| NM_152299    | NCAPH2  | 862  | 956  | 7.4767337204  |
| NM_152299    | NCAPH2  | 151  | 281  | 8.47673372063 |
| NM_152299    | NCAPH2  | 1491 | 1655 | 9.06169622135 |
| NM_152299    | NCAPH2  | 1113 | 1208 | 6.47673372063 |
| NM_152299    | NCAPH2  | 1351 | 1451 | 7.47673372063 |
| NM_021946    | BCORL1  | 156  | 211  | 8.83777058854 |
| NM_021946    | BCORL1  | 5632 | 5681 | 8.83777058854 |
| NM_021946    | BCORL1  | 1540 | 1618 | 8.84178818849 |
| NM_152295    | TARS    | 2524 | 2565 | 4.42902398498 |
| NM_152295    | TARS    | 1388 | 1486 | 5.75095208009 |
| NM_152295    | TARS    | 405  | 467  | 5.4290239852  |
| NM_152295    | TARS    | 251  | 326  | 5.4290239852  |
| NM_152295    | TARS    | 2311 | 2380 | 5.01398648592 |
| NM_152295    | TARS    | 1836 | 1945 | 5.01398648592 |
| NM_152295    | TARS    | 737  | 780  | 5.0138127356  |
| NM_152295    | TARS    | 572  | 733  | 7.23637890726 |
| NM_152295    | TARS    | 1235 | 1351 | 5.01398648592 |
| NM_152295    | TARS    | 2706 | 2771 | 3.42902374928 |
| NM_152295    | TARS    | 2154 | 2306 | 6.23637890726 |
| NM_152295    | TARS    | 848  | 1135 | 7.12946370334 |

|           |          |      |      |               |               |
|-----------|----------|------|------|---------------|---------------|
| NM_152295 | TARS     | 1508 | 1796 | 8.18391148736 |               |
| NM_021943 | ZFAND3   | 904  | 976  | 6.06788339569 |               |
| NM_021943 | ZFAND3   | 607  | 662  | 4.47890329481 |               |
| NM_021943 | ZFAND3   | 2103 | 2157 | 5.39878168559 |               |
| NM_021943 | ZFAND3   | 669  | 725  | 4.48292089476 |               |
| NM_021943 | ZFAND3   | 808  | 891  | 6.0678833957  |               |
| NM_021943 | ZFAND3   | 3102 | 3171 | 5.48292089498 |               |
| NM_021943 | ZFAND3   | 2628 | 2726 | 6.80484898987 |               |
| NM_021943 | ZFAND3   | 493  | 529  | 4.48274714466 |               |
| NM_021943 | ZFAND3   | 2207 | 2308 | 6.0678833957  |               |
| NM_021943 | ZFAND3   | 1157 | 1286 | 7.48292089498 |               |
| NM_152293 | TADA2B   | 2684 | 2733 | 8.23216659071 |               |
| NM_152293 | TADA2B   | 2883 | 2927 | 6.56307161166 |               |
| NM_152293 | TADA2B   | 2330 | 2379 | 6.64720408999 |               |
| NM_152293 | TADA2B   | 377  | 459  | 6.64721082082 |               |
| NM_152293 | TADA2B   | 2249 | 2322 | 6.64703707073 |               |
| NM_032782 | HAVCR2   | 1606 | 1649 | 9.33741360947 |               |
| NM_004252 | SLC9A3R1 |      | 1022 | 1057          | 3.83666740503 |
| NM_004252 | SLC9A3R1 |      | 654  | 709           | 3.83666740503 |
| NM_004252 | SLC9A3R1 |      | 1771 | 1822          | 5.42162990575 |
| NM_004252 | SLC9A3R1 |      | 1426 | 1469          | 4.83666740503 |
| NM_004252 | SLC9A3R1 |      | 1673 | 1740          | 4.83667413609 |
| NM_004252 | SLC9A3R1 |      | 36   | 159           | 7.00659913753 |
| NM_004252 | SLC9A3R1 |      | 1824 | 1911          | 4.7525349267  |
| NM_004252 | SLC9A3R1 |      | 1116 | 1328          | 7.15860223097 |
| NM_004252 | SLC9A3R1 |      | 807  | 960           | 6.15860223097 |
| NM_004252 | SLC9A3R1 |      | 260  | 331           | 3.7525349267  |
| NM_004252 | SLC9A3R1 |      | 1560 | 1653          | 3.83666740503 |
| NM_014860 | SUPT7L   | 1093 | 1165 | 6.5358828474  |               |
| NM_014860 | SUPT7L   | 1310 | 1363 | 4.95074659637 |               |
| NM_014860 | SUPT7L   | 1183 | 1227 | 5.8667811373  |               |
| NM_014860 | SUPT7L   | 1006 | 1081 | 6.53588283986 |               |
| NM_014860 | SUPT7L   | 563  | 668  | 5.95092034669 |               |
| NM_014860 | SUPT7L   | 1641 | 1767 | 4.95092033914 |               |
| NM_014860 | SUPT7L   | 924  | 1006 | 4.95092034669 |               |
| NM_014864 | FAM20B   | 1375 | 1417 | 7.3374859154  |               |
| NM_014864 | FAM20B   | 4621 | 4675 | 7.3374859154  |               |
| NM_014864 | FAM20B   | 746  | 800  | 8.34132976525 |               |
| NM_014864 | FAM20B   | 5193 | 5255 | 7.92629226597 |               |
| NM_014864 | FAM20B   | 3805 | 3840 | 7.92244841612 |               |
| NM_014864 | FAM20B   | 422  | 442  | 6.3374859154  |               |
| NM_014865 | NCAPD2   | 3765 | 3806 | 6.34212783931 |               |
| NM_014865 | NCAPD2   | 4284 | 4347 | 6.34212807523 |               |
| NM_014865 | NCAPD2   | 1544 | 1630 | 6.02019998034 |               |
| NM_014865 | NCAPD2   | 1644 | 1770 | 6.60516248106 |               |
| NM_014865 | NCAPD2   | 3986 | 4058 | 6.02019324929 |               |
| NM_014865 | NCAPD2   | 3886 | 3982 | 6.34212807523 |               |
| NM_014865 | NCAPD2   | 2062 | 2120 | 5.60516248106 |               |
| NM_014865 | NCAPD2   | 2690 | 2725 | 4.93606077096 |               |
| NM_014865 | NCAPD2   | 3820 | 3880 | 4.02019998034 |               |

|           |        |      |      |               |
|-----------|--------|------|------|---------------|
| NM_014865 | NCAPD2 | 4156 | 4208 | 5.02019997279 |
| NM_014865 | NCAPD2 | 4409 | 4485 | 4.02019974442 |
| NM_014865 | NCAPD2 | 78   | 118  | 5.02019997279 |
| NM_014865 | NCAPD2 | 1366 | 1410 | 5.60516248106 |
| NM_014865 | NCAPD2 | 521  | 706  | 6.8275549024  |
| NM_014865 | NCAPD2 | 21   | 75   | 5.01618238017 |
| NM_014865 | NCAPD2 | 3406 | 3534 | 6.60516248106 |
| NM_014865 | NCAPD2 | 768  | 999  | 7.34212807523 |
| NM_014865 | NCAPD2 | 1786 | 1899 | 6.8275549024  |
| NM_014865 | NCAPD2 | 340  | 514  | 7.8275549024  |
| NM_014865 | NCAPD2 | 999  | 1106 | 7.19012498178 |
| NM_014865 | NCAPD2 | 3627 | 3741 | 4.02019998034 |
| NM_014865 | NCAPD2 | 3020 | 3404 | 8.7750874825  |
| NM_014865 | NCAPD2 | 121  | 301  | 7.47963159898 |
| NM_014865 | NCAPD2 | 2326 | 2607 | 8.34212807523 |
| NM_014865 | NCAPD2 | 2133 | 2324 | 7.19012498178 |
| NM_014865 | NCAPD2 | 1972 | 2060 | 5.60516248106 |
| NM_014865 | NCAPD2 | 2797 | 2863 | 4.02019998034 |
| NM_014865 | NCAPD2 | 2867 | 3010 | 6.34212807523 |
| NM_014865 | NCAPD2 | 1150 | 1304 | 7.34212807523 |
| NM_014866 | SEC16A | 1642 | 1736 | 9.83342623869 |
| NM_014866 | SEC16A | 2906 | 2978 | 9.24846373797 |
| NM_014866 | SEC16A | 6517 | 6569 | 7.24846373797 |
| NM_014866 | SEC16A | 5965 | 6021 | 7.16432452858 |
| NM_014866 | SEC16A | 5172 | 5252 | 8.83342623869 |
| NM_014866 | SEC16A | 5347 | 5418 | 8.83342623869 |
| NM_014866 | SEC16A | 2027 | 2069 | 7.24846350205 |
| NM_014866 | SEC16A | 718  | 753  | 8.83325248837 |
| NM_014866 | SEC16A | 4949 | 5014 | 8.83342623869 |
| NM_014866 | SEC16A | 2761 | 2827 | 9.83341950764 |
| NM_014866 | SEC16A | 5852 | 5892 | 7.24846350205 |
| NM_014866 | SEC16A | 6128 | 6207 | 8.24444613779 |
| NM_014866 | SEC16A | 6867 | 6897 | 7.16432452858 |
| NM_014866 | SEC16A | 8513 | 8748 | 10.7078953566 |
| NM_014866 | SEC16A | 6386 | 6499 | 7.24846373775 |
| NM_014866 | SEC16A | 7561 | 7646 | 8.83342623114 |
| NM_014866 | SEC16A | 5427 | 5502 | 8.83342623868 |
| NM_014866 | SEC16A | 8381 | 8498 | 10.248463738  |
| NM_014866 | SEC16A | 7393 | 7519 | 7.24846373797 |
| NM_014868 | RNF10  | 1718 | 1775 | 4.98215593001 |
| NM_014868 | RNF10  | 2199 | 2252 | 4.98617329427 |
| NM_014868 | RNF10  | 1047 | 1140 | 7.30810162508 |
| NM_014868 | RNF10  | 1266 | 1325 | 6.98617329427 |
| NM_014868 | RNF10  | 1631 | 1716 | 6.57113603091 |
| NM_014868 | RNF10  | 1777 | 1828 | 4.98215593001 |
| NM_014868 | RNF10  | 2418 | 2466 | 6.56711843074 |
| NM_014868 | RNF10  | 1174 | 1231 | 4.98599977987 |
| NM_014868 | RNF10  | 988  | 1045 | 4.98616679913 |
| NM_014868 | RNF10  | 873  | 983  | 8.15609853163 |
| NM_005370 | RAB8A  | 819  | 902  | 4.89987470398 |

|              |        |       |       |               |
|--------------|--------|-------|-------|---------------|
| NM_005370    | RAB8A  | 984   | 1046  | 4.3149054722  |
| NM_005370    | RAB8A  | 218   | 282   | 4.31491220303 |
| NM_005370    | RAB8A  | 1055  | 1121  | 4.31491196734 |
| NM_005370    | RAB8A  | 1663  | 1855  | 6.31491220326 |
| NM_005370    | RAB8A  | 517   | 595   | 4.89987446806 |
| NM_005370    | RAB8A  | 285   | 453   | 7.0153519214  |
| NM_001005920 | JMJD8  | 578   | 610   | 8.93284532656 |
| NM_138288    | SPTSSA | 752   | 811   | 6.03117172008 |
| NM_138288    | SPTSSA | 1657  | 1687  | 3.62510441603 |
| NM_138288    | SPTSSA | 487   | 562   | 4.70924362519 |
| NM_012138    | AATF   | 1849  | 1898  | 4.06837126134 |
| NM_012138    | AATF   | 541   | 622   | 5.65333353369 |
| NM_012138    | AATF   | 1576  | 1618  | 6.06837126134 |
| NM_012138    | AATF   | 1405  | 1488  | 6.06837126867 |
| NM_012138    | AATF   | 493   | 538   | 3.98423205951 |
| NM_012138    | AATF   | 1622  | 1713  | 5.06837126134 |
| NM_173210    | TGIF1  | 1440  | 1509  | 5.36592229378 |
| NM_173210    | TGIF1  | 381   | 425   | 3.780953062   |
| NM_173214    | NFAT5  | 3685  | 3741  | 7.04073737064 |
| NM_173214    | NFAT5  | 1944  | 2009  | 7.04057035138 |
| NM_173214    | NFAT5  | 7823  | 7883  | 7.04074410147 |
| NM_173214    | NFAT5  | 12762 | 12833 | 7.54156739303 |
| NM_173214    | NFAT5  | 5588  | 5638  | 5.95660489231 |
| NM_173214    | NFAT5  | 9325  | 9384  | 6.03672650152 |
| NM_173214    | NFAT5  | 1384  | 1490  | 8.84809902375 |
| NM_173214    | NFAT5  | 327   | 376   | 6.04074409415 |
| NM_173214    | NFAT5  | 8346  | 8402  | 6.04074386578 |
| NM_173214    | NFAT5  | 1493  | 1562  | 6.0407441017  |
| NM_173214    | NFAT5  | 8049  | 8141  | 6.04074386578 |
| NM_173214    | NFAT5  | 6672  | 6741  | 7.0407441017  |
| NM_173214    | NFAT5  | 1842  | 1898  | 7.62168900224 |
| NM_173214    | NFAT5  | 12985 | 13064 | 8.62570660241 |
| NM_173214    | NFAT5  | 154   | 196   | 6.04073737064 |
| NM_173214    | NFAT5  | 4453  | 4508  | 6.03672650152 |
| NM_173214    | NFAT5  | 12582 | 12677 | 6.0407441017  |
| NM_173214    | NFAT5  | 4933  | 5024  | 7.6255328521  |
| NM_173214    | NFAT5  | 1118  | 1272  | 7.0407441017  |
| NM_173214    | NFAT5  | 6550  | 6646  | 7.04074410147 |
| NM_012133    | COPG2  | 1521  | 1578  | 7.14940988013 |
| NM_012133    | COPG2  | 2524  | 2571  | 7.14940988013 |
| NM_012133    | COPG2  | 1796  | 1871  | 7.14940988013 |
| NM_012133    | COPG2  | 2320  | 2355  | 7.14941637527 |
| NM_012133    | COPG2  | 1216  | 1263  | 6.14539901101 |
| NM_012133    | COPG2  | 2705  | 2766  | 6.0652774018  |
| NM_012133    | COPG2  | 1038  | 1089  | 7.0652774018  |
| NM_012133    | COPG2  | 1933  | 2020  | 7.14941637527 |
| NM_012133    | COPG2  | 1636  | 1704  | 6.14924286087 |
| NM_012133    | COPG2  | 1270  | 1386  | 7.73437911191 |
| NM_012137    | DDAH1  | 3738  | 3817  | 5.81400617139 |
| NM_012137    | DDAH1  | 310   | 358   | 4.22502607805 |

|           |         |      |      |               |
|-----------|---------|------|------|---------------|
| NM_012137 | DDAH1   | 3897 | 3954 | 5.80998857877 |
| NM_012137 | DDAH1   | 636  | 742  | 5.81399944789 |
| NM_012137 | DDAH1   | 3043 | 3085 | 4.2288699279  |
| NM_012137 | DDAH1   | 1296 | 1387 | 6.5509717731  |
| NM_012137 | DDAH1   | 3612 | 3654 | 5.80998857877 |
| NM_012137 | DDAH1   | 1910 | 1938 | 4.14490446884 |
| NM_012137 | DDAH1   | 1060 | 1149 | 7.22904367822 |
| NM_012137 | DDAH1   | 588  | 628  | 5.22904367067 |
| NM_012137 | DDAH1   | 777  | 836  | 5.22904367822 |
| NM_012137 | DDAH1   | 893  | 1046 | 6.22904367822 |
| NM_012137 | DDAH1   | 1955 | 2032 | 4.22904367822 |
| NM_012137 | DDAH1   | 3246 | 3301 | 5.80998857877 |
| NM_012137 | DDAH1   | 3157 | 3245 | 6.81400617894 |
| NM_012137 | DDAH1   | 2146 | 2323 | 7.22904367822 |
| NM_012137 | DDAH1   | 506  | 574  | 5.2288699279  |
| NM_012426 | SF3B3   | 614  | 686  | 6.46611706875 |
| NM_012426 | SF3B3   | 817  | 898  | 3.65474454652 |
| NM_012426 | SF3B3   | 3085 | 3152 | 5.65876214669 |
| NM_012426 | SF3B3   | 1661 | 1733 | 6.46611706875 |
| NM_012426 | SF3B3   | 4202 | 4267 | 3.65858839638 |
| NM_012426 | SF3B3   | 2823 | 2873 | 3.65474454652 |
| NM_012426 | SF3B3   | 4142 | 4202 | 5.98069024158 |
| NM_012426 | SF3B3   | 2741 | 2823 | 5.98069024158 |
| NM_012426 | SF3B3   | 2875 | 2976 | 6.82868714814 |
| NM_012426 | SF3B3   | 3426 | 3476 | 3.65876213914 |
| NM_012426 | SF3B3   | 4100 | 4141 | 3.65875541564 |
| NM_012426 | SF3B3   | 2979 | 3063 | 5.24372464741 |
| NM_012426 | SF3B3   | 1450 | 1616 | 7.74622498794 |
| NM_012426 | SF3B3   | 546  | 612  | 5.65876214669 |
| NM_012426 | SF3B3   | 3164 | 3223 | 6.24372464741 |
| NM_012426 | SF3B3   | 1378 | 1442 | 5.98069024158 |
| NM_012426 | SF3B3   | 3279 | 3425 | 5.98069024158 |
| NM_012426 | SF3B3   | 2483 | 2651 | 7.24372464741 |
| NM_012426 | SF3B3   | 3603 | 3826 | 6.82868714814 |
| NM_012426 | SF3B3   | 3831 | 3935 | 4.65876214669 |
| NM_012426 | SF3B3   | 2382 | 2477 | 5.98069024158 |
| NM_012426 | SF3B3   | 3936 | 4077 | 6.24372464741 |
| NM_012426 | SF3B3   | 3477 | 3601 | 5.65876214669 |
| NM_012426 | SF3B3   | 700  | 812  | 5.98069024158 |
| NM_012426 | SF3B3   | 939  | 1350 | 8.86821551232 |
| NM_012426 | SF3B3   | 37   | 335  | 7.24372464741 |
| NM_012426 | SF3B3   | 1902 | 2336 | 9.24372464741 |
| NM_012426 | SF3B3   | 1774 | 1899 | 6.24372464741 |
| NM_012426 | SF3B3   | 394  | 546  | 6.65876214669 |
| NM_012424 | RPS6KC1 | 454  | 501  | 6.57817006726 |
| NM_012424 | RPS6KC1 | 630  | 712  | 8.66230927665 |
| NM_012424 | RPS6KC1 | 758  | 798  | 7.65829167647 |
| NM_012425 | RSU1    | 611  | 662  | 8.55484730015 |
| NM_012425 | RSU1    | 1232 | 1280 | 7.9698847992  |
| NM_012425 | RSU1    | 308  | 361  | 7.96988479943 |



|              |            |      |      |                |               |
|--------------|------------|------|------|----------------|---------------|
| NM_012425    | RSU1       | 110  | 185  | 7.96586719925  |               |
| NM_012425    | RSU1       | 444  | 610  | 9.96988479943  |               |
| NM_012423    | RPL13A     | 139  | 219  | 2.71102330021  |               |
| NM_012423    | RPL13A     | 54   | 138  | 0.711023300211 |               |
| NM_012423    | RPL13A     | 408  | 548  | 3.29598580093  |               |
| NM_012423    | RPL13A     | 917  | 1058 | 3.0329513951   |               |
| NM_012423    | RPL13A     | 224  | 406  | 3.29598580093  |               |
| NM_012423    | RPL13A     | 548  | 912  | 4.0329513951   |               |
| NM_004528    | MGST3      | 422  | 497  | 9.18491841415  |               |
| NM_004528    | MGST3      | 672  | 933  | 9.99227333622  |               |
| NM_003516    | HIST2H2AA3 |      | 482  | 530            | 5.90795705029 |
| NM_003516    | HIST2H2AA3 |      | 377  | 452            | 8.22988514517 |
| NM_003516    | HIST2H2AA3 |      | 199  | 370            | 9.49291955101 |
| NM_003516    | HIST2H2AA3 |      | 1    | 113            | 9.22988514517 |
| NM_001014764 | TMEM93     | 483  | 535  | 7.35462615106  |               |
| NM_001014764 | TMEM93     | 627  | 717  | 6.03269806372  |               |
| NM_001014764 | TMEM93     | 719  | 817  | 7.35462615861  |               |
| NM_152834    | TMEM18     | 395  | 462  | 3.46561621109  |               |
| NM_206917    | NGFRAP1    | 315  | 389  | 5.5983800585   |               |
| NM_206917    | NGFRAP1    | 488  | 898  | 11.0246448132  |               |
| NM_182533    | C1orf86    | 112  | 157  | 8.47829385126  |               |
| NM_182533    | C1orf86    | 246  | 329  | 8.48231144389  |               |
| NM_182531    | ZNF778     | 1348 | 1379 | 9.23844445684  |               |
| NM_182531    | ZNF778     | 3355 | 3406 | 10.8234069576  |               |
| NM_001017928 | CCDC58     | 461  | 503  | 2.5983924968   |               |
| NM_003045    | SLC7A1     | 7006 | 7055 | 5.68005461612  |               |
| NM_003045    | SLC7A1     | 4990 | 5035 | 6.68005461612  |               |
| NM_003045    | SLC7A1     | 6088 | 6150 | 6.68022836644  |               |
| NM_003045    | SLC7A1     | 1708 | 1770 | 8.26519086716  |               |
| NM_003045    | SLC7A1     | 7192 | 7252 | 6.68022835889  |               |
| NM_003045    | SLC7A1     | 2620 | 2714 | 6.68022836644  |               |
| NM_003045    | SLC7A1     | 411  | 471  | 5.68022813052  |               |
| NM_003045    | SLC7A1     | 4824 | 4871 | 6.68022163539  |               |
| NM_003045    | SLC7A1     | 194  | 259  | 6.68022836622  |               |
| NM_003045    | SLC7A1     | 271  | 402  | 8.26519086716  |               |
| NM_003045    | SLC7A1     | 3218 | 3282 | 6.68022163539  |               |
| NM_003045    | SLC7A1     | 6151 | 6199 | 5.68022163539  |               |
| NM_003045    | SLC7A1     | 3977 | 4039 | 5.68022813052  |               |
| NM_003045    | SLC7A1     | 1117 | 1171 | 7.68022836644  |               |
| NM_003045    | SLC7A1     | 2498 | 2557 | 7.26519086716  |               |
| NM_003045    | SLC7A1     | 2236 | 2283 | 5.68022836644  |               |
| NM_003045    | SLC7A1     | 6748 | 6795 | 6.67621076627  |               |
| NM_003045    | SLC7A1     | 4123 | 4232 | 8.4875832885   |               |
| NM_003045    | SLC7A1     | 7059 | 7147 | 8.00215646133  |               |
| NM_003045    | SLC7A1     | 660  | 955  | 10.0725457892  |               |
| NM_003045    | SLC7A1     | 3804 | 3866 | 6.67621076627  |               |
| NM_003045    | SLC7A1     | 6227 | 6301 | 6.68022836644  |               |
| NM_003045    | SLC7A1     | 2840 | 2934 | 6.67621076627  |               |
| NM_003045    | SLC7A1     | 958  | 1107 | 9.38066808458  |               |
| NM_003045    | SLC7A1     | 5281 | 5408 | 7.68022836644  |               |

|              |              |      |      |               |               |
|--------------|--------------|------|------|---------------|---------------|
| NM_003045    | SLC7A1       | 1457 | 1674 | 10.1396599851 |               |
| NM_003045    | SLC7A1       | 473  | 658  | 9.00215646133 |               |
| NM_003045    | SLC7A1       | 3484 | 3578 | 6.68022813052 |               |
| NM_003045    | SLC7A1       | 1818 | 2017 | 9.4875832885  |               |
| NM_003045    | SLC7A1       | 4279 | 4386 | 8.26519086716 |               |
| NM_003045    | SLC7A1       | 1182 | 1439 | 10.0021564613 |               |
| NM_003045    | SLC7A1       | 2042 | 2228 | 8.85015336788 |               |
| NM_003045    | SLC7A1       | 3045 | 3177 | 8.26519086716 |               |
| NM_001198954 | RNF103-VPS24 |      | 1080 | 1135          | 4.60565252693 |
| NM_001198954 | RNF103-VPS24 |      | 1244 | 1301          | 5.1906082966  |
| NM_001198954 | RNF103-VPS24 |      | 3042 | 3125          | 4.60564579588 |
| NM_001198954 | RNF103-VPS24 |      | 733  | 850           | 5.92758062182 |
| NM_001198954 | RNF103-VPS24 |      | 530  | 612           | 5.18659742748 |
| NM_004779    | CNOT8        | 264  | 312  | 3.5754536392  |               |
| NM_004779    | CNOT8        | 1499 | 1551 | 3.49533202999 |               |
| NM_004779    | CNOT8        | 1170 | 1208 | 2.5754536392  |               |
| NM_004779    | CNOT8        | 1730 | 1803 | 4.16041613992 |               |
| NM_004779    | CNOT8        | 792  | 851  | 4.90139909834 |               |
| NM_004779    | CNOT8        | 1577 | 1644 | 3.49533202999 |               |
| NM_001071    | TYMS         | 1493 | 1537 | 4.93024132142 |               |
| NM_001071    | TYMS         | 740  | 837  | 6.51922142231 |               |
| NM_001071    | TYMS         | 995  | 1035 | 4.93408517128 |               |
| NM_001071    | TYMS         | 1282 | 1355 | 6.51922142231 |               |
| NM_001071    | TYMS         | 272  | 740  | 9.8411495172  |               |
| NM_001071    | TYMS         | 1062 | 1199 | 4.93425892159 |               |
| NM_001071    | TYMS         | 1201 | 1280 | 6.51922142231 |               |
| NM_001071    | TYMS         | 841  | 979  | 6.93425892159 |               |
| NM_001070    | TUBG1        | 1256 | 1326 | 4.45392364486 |               |
| NM_001070    | TUBG1        | 573  | 628  | 2.86896114414 |               |
| NM_001070    | TUBG1        | 629  | 708  | 2.86896114414 |               |
| NM_001070    | TUBG1        | 1537 | 1580 | 3.78482193475 |               |
| NM_001070    | TUBG1        | 1620 | 1701 | 5.45392364486 |               |
| NM_001070    | TUBG1        | 1094 | 1230 | 5.19088923902 |               |
| NM_001070    | TUBG1        | 968  | 1061 | 4.86896114414 |               |
| NM_001070    | TUBG1        | 733  | 953  | 6.19088923902 |               |
| NM_001070    | TUBG1        | 404  | 483  | 5.19088923902 |               |
| NM_001070    | TUBG1        | 1806 | 1942 | 6.03888614558 |               |
| NM_001073    | UGT2B11      | 434  | 495  | 10.3840082905 |               |
| NM_001073    | UGT2B11      | 1113 | 1150 | 10.6470426963 |               |
| NM_001073    | UGT2B11      | 1375 | 1418 | 11.0620801956 |               |
| NM_001073    | UGT2B11      | 985  | 1103 | 11.9689707912 |               |
| NM_001073    | UGT2B11      | 6    | 109  | 10.8694351177 |               |
| NM_001073    | UGT2B11      | 824  | 874  | 9.0620801956  |               |
| NM_001073    | UGT2B11      | 875  | 953  | 11.6470426963 |               |
| NM_001073    | UGT2B11      | 744  | 801  | 7.97794098622 |               |
| NM_001073    | UGT2B11      | 112  | 198  | 10.6470426963 |               |
| NM_001073    | UGT2B11      | 1459 | 1537 | 10.6470426963 |               |
| NM_001073    | UGT2B11      | 622  | 735  | 11.5215118142 |               |
| NM_001073    | UGT2B11      | 1193 | 1362 | 11.5215118142 |               |
| NM_004776    | B4GALT5      | 2994 | 3047 | 5.05433452444 |               |

|              |         |      |      |               |
|--------------|---------|------|------|---------------|
| NM_004776    | B4GALT5 | 835  | 916  | 7.05433452466 |
| NM_004776    | B4GALT5 | 2243 | 2295 | 6.05432779361 |
| NM_004776    | B4GALT5 | 993  | 1047 | 5.05433452466 |
| NM_004776    | B4GALT5 | 1813 | 1862 | 5.05031692449 |
| NM_004776    | B4GALT5 | 447  | 490  | 6.63527942521 |
| NM_004776    | B4GALT5 | 507  | 556  | 5.97019531528 |
| NM_004776    | B4GALT5 | 3354 | 3427 | 5.05433452466 |
| NM_004776    | B4GALT5 | 2952 | 2987 | 5.05031692449 |
| NM_004776    | B4GALT5 | 3153 | 3201 | 5.05031692449 |
| NM_004776    | B4GALT5 | 236  | 323  | 7.37626261955 |
| NM_004776    | B4GALT5 | 922  | 973  | 6.05432779361 |
| NM_004776    | B4GALT5 | 1197 | 1261 | 6.63527942521 |
| NM_004776    | B4GALT5 | 327  | 424  | 7.63929702538 |
| NM_004776    | B4GALT5 | 1530 | 1590 | 6.555157816   |
| NM_001075    | UGT2B10 | 1124 | 1165 | 6.81291594643 |
| NM_001075    | UGT2B10 | 1467 | 1537 | 7.29834277382 |
| NM_001075    | UGT2B10 | 454  | 533  | 6.49098785177 |
| NM_001075    | UGT2B10 | 17   | 111  | 8.19142756991 |
| NM_001075    | UGT2B10 | 1338 | 1443 | 8.19142756991 |
| NM_001075    | UGT2B10 | 1032 | 1118 | 6.49098785177 |
| NM_001075    | UGT2B10 | 337  | 391  | 5.40684864238 |
| NM_001075    | UGT2B10 | 1550 | 1672 | 7.66091285321 |
| NM_001075    | UGT2B10 | 835  | 986  | 8.81291594665 |
| NM_001075    | UGT2B10 | 1236 | 1333 | 7.29834277382 |
| NM_001075    | UGT2B10 | 697  | 815  | 5.49098785177 |
| NM_001075    | UGT2B10 | 117  | 252  | 8.29834277382 |
| NM_001074    | UGT2B7  | 382  | 438  | 5.83363872959 |
| NM_001074    | UGT2B7  | 1143 | 1187 | 8.15556682448 |
| NM_001074    | UGT2B7  | 149  | 185  | 8.41860123032 |
| NM_001074    | UGT2B7  | 1687 | 1736 | 5.82962112942 |
| NM_001074    | UGT2B7  | 474  | 604  | 10.003563731  |
| NM_001074    | UGT2B7  | 264  | 365  | 8.15556682448 |
| NM_001074    | UGT2B7  | 186  | 262  | 7.83363872959 |
| NM_001074    | UGT2B7  | 848  | 1104 | 11.0430920952 |
| NM_001074    | UGT2B7  | 1222 | 1681 | 11.8109186531 |
| NM_001074    | UGT2B7  | 608  | 847  | 11.1555668245 |
| NM_001074    | UGT2B7  | 14   | 142  | 8.83363872959 |
| NM_001135820 | TMEM2   | 1311 | 1343 | 5.95633265101 |
| NM_001135820 | TMEM2   | 20   | 53   | 4.37120313102 |
| NM_001135820 | TMEM2   | 536  | 593  | 5.37137687379 |
| NM_001135820 | TMEM2   | 5903 | 5983 | 6.37137688134 |
| NM_001135820 | TMEM2   | 681  | 769  | 6.37137688134 |
| NM_001135820 | TMEM2   | 5228 | 5320 | 7.54130188278 |
| NM_001135820 | TMEM2   | 1146 | 1179 | 4.28723767195 |
| NM_001135820 | TMEM2   | 1184 | 1293 | 7.54130188278 |
| NM_001135820 | TMEM2   | 882  | 1111 | 9.1262643835  |
| NM_001135820 | TMEM2   | 1943 | 1986 | 4.36735928116 |
| NM_001135820 | TMEM2   | 405  | 536  | 8.07181659948 |
| NM_001135820 | TMEM2   | 4690 | 4806 | 7.69330497623 |
| NM_001135820 | TMEM2   | 5829 | 5870 | 5.37137688112 |

|              |        |      |      |               |
|--------------|--------|------|------|---------------|
| NM_001135820 | TMEM2  | 1680 | 1931 | 9.1262643835  |
| NM_001135820 | TMEM2  | 4830 | 4955 | 6.69330497623 |
| NM_001135820 | TMEM2  | 5320 | 5491 | 9.1787318034  |
| NM_001135820 | TMEM2  | 1360 | 1673 | 9.4157710007  |
| NM_001135820 | TMEM2  | 4418 | 4672 | 7.83080849997 |
| NM_001135820 | TMEM2  | 4131 | 4189 | 6.37137688112 |
| NM_001135820 | TMEM2  | 5518 | 5569 | 6.37120313102 |
| NM_001135820 | TMEM2  | 1986 | 2277 | 9.1787318034  |
| NM_001135820 | TMEM2  | 3603 | 4109 | 10.0152330711 |
| NM_001135820 | TMEM2  | 3035 | 3595 | 10.6751576295 |
| NM_001135820 | TMEM2  | 2284 | 2819 | 10.4157710007 |
| NM_001135820 | TMEM2  | 4192 | 4413 | 8.61930439478 |
| NM_001135820 | TMEM2  | 6053 | 6276 | 8.83080849997 |
| NM_001135820 | TMEM2  | 2819 | 2980 | 8.37137688134 |
| NM_001135820 | TMEM2  | 4962 | 5216 | 8.27826747695 |
| NM_001135821 | FDPS   | 1401 | 1473 | 2.65131086646 |
| NM_001135821 | FDPS   | 1323 | 1377 | 3.65130413541 |
| NM_001135821 | FDPS   | 50   | 100  | 2.65113711614 |
| NM_001135821 | FDPS   | 343  | 1035 | 9.09425436231 |
| NM_001135821 | FDPS   | 1071 | 1297 | 7.3517505846  |
| NM_000476    | AK1    | 461  | 498  | 5.70546417884 |
| NM_000476    | AK1    | 897  | 947  | 6.70529043607 |
| NM_006861    | RAB35  | 1089 | 1136 | 4.46486978277 |
| NM_006861    | RAB35  | 875  | 913  | 4.4647027635  |
| NM_006861    | RAB35  | 484  | 586  | 6.04983901454 |
| NM_006861    | RAB35  | 2061 | 2153 | 6.04983901432 |
| NM_001142551 | WDR47  | 186  | 216  | 7.48212015005 |
| NM_001142556 | HMMR   | 2310 | 2342 | 6.09019262146 |
| NM_001142556 | HMMR   | 1271 | 1384 | 4.5092477209  |
| NM_001142556 | HMMR   | 464  | 535  | 4.50523012073 |
| NM_004593    | TRA2B  | 1446 | 1495 | 4.03545137186 |
| NM_004593    | TRA2B  | 1637 | 1705 | 5.03545810291 |
| NM_004593    | TRA2B  | 260  | 329  | 3.03144050274 |
| NM_004593    | TRA2B  | 507  | 559  | 4.62042060363 |
| NM_004593    | TRA2B  | 1386 | 1427 | 4.61640300346 |
| NM_004593    | TRA2B  | 1727 | 1787 | 3.03545137186 |
| NM_004593    | TRA2B  | 340  | 388  | 4.03545786699 |
| NM_004593    | TRA2B  | 706  | 868  | 6.20538310435 |
| NM_004593    | TRA2B  | 571  | 682  | 6.3573861978  |
| NM_004593    | TRA2B  | 1242 | 1346 | 5.3573861978  |
| NM_004593    | TRA2B  | 1079 | 1227 | 7.03545810291 |
| NM_004593    | TRA2B  | 886  | 992  | 5.3573861978  |
| NM_004592    | SFSWAP | 355  | 395  | 6.51845802559 |
| NM_004592    | SFSWAP | 3114 | 3178 | 7.18755972815 |
| NM_004595    | SMS    | 1511 | 1576 | 2.14928561868 |
| NM_004595    | SMS    | 234  | 282  | 2.0651464093  |
| NM_004595    | SMS    | 338  | 426  | 4.47121371357 |
| NM_004595    | SMS    | 884  | 985  | 4.14928561868 |
| NM_004595    | SMS    | 432  | 574  | 4.47121371357 |
| NM_004595    | SMS    | 607  | 683  | 2.14928538276 |

|              |        |      |      |               |
|--------------|--------|------|------|---------------|
| NM_004595    | SMS    | 1252 | 1319 | 4.47121371357 |
| NM_004595    | SMS    | 1612 | 1767 | 4.7342481194  |
| NM_004595    | SMS    | 807  | 879  | 3.14928561868 |
| NM_004595    | SMS    | 985  | 1252 | 6.14928561868 |
| NM_004595    | SMS    | 1320 | 1425 | 3.14928561868 |
| NM_001131028 | ATG10  | 310  | 354  | 10.471282804  |
| NM_004597    | SNRPD2 | 470  | 540  | 7.45739448647 |
| NM_004597    | SNRPD2 | 254  | 308  | 5.45739425055 |
| NM_004597    | SNRPD2 | 426  | 469  | 4.45739425055 |
| NM_004597    | SNRPD2 | 325  | 422  | 7.62731948791 |
| NM_004597    | SNRPD2 | 607  | 736  | 7.45739448647 |
| NM_004596    | SNRPA  | 805  | 878  | 8.47097057817 |
| NM_004596    | SNRPA  | 1340 | 1417 | 7.47097057817 |
| NM_004596    | SNRPA  | 591  | 662  | 6.47097057817 |
| NM_004596    | SNRPA  | 382  | 422  | 6.38683136879 |
| NM_004596    | SNRPA  | 1135 | 1234 | 8.05593307889 |
| NM_004596    | SNRPA  | 319  | 378  | 7.47097057795 |
| NM_004596    | SNRPA  | 426  | 570  | 9.05593307889 |
| NM_004599    | SREBF2 | 476  | 549  | 4.62574454276 |
| NM_004599    | SREBF2 | 1881 | 1951 | 6.62574454276 |
| NM_004599    | SREBF2 | 1035 | 1120 | 5.62574454276 |
| NM_004599    | SREBF2 | 895  | 968  | 6.21070031243 |
| NM_004599    | SREBF2 | 4538 | 4614 | 6.62574430685 |
| NM_004599    | SREBF2 | 414  | 466  | 6.21070704348 |
| NM_004599    | SREBF2 | 5066 | 5132 | 5.62574454276 |
| NM_004599    | SREBF2 | 4632 | 4717 | 4.62574454276 |
| NM_004599    | SREBF2 | 2783 | 2855 | 7.62574454276 |
| NM_004599    | SREBF2 | 1170 | 1281 | 6.62574454276 |
| NM_004599    | SREBF2 | 3705 | 3775 | 6.21070704348 |
| NM_004599    | SREBF2 | 322  | 375  | 5.62574453521 |
| NM_004599    | SREBF2 | 3195 | 3258 | 4.62573781171 |
| NM_004599    | SREBF2 | 1357 | 1394 | 4.62172694259 |
| NM_004599    | SREBF2 | 4085 | 4181 | 7.43309946482 |
| NM_004599    | SREBF2 | 175  | 294  | 7.21070704348 |
| NM_004599    | SREBF2 | 2012 | 2126 | 7.43309946482 |
| NM_004599    | SREBF2 | 3048 | 3092 | 5.54160533338 |
| NM_004599    | SREBF2 | 3794 | 3875 | 5.62574454276 |
| NM_004599    | SREBF2 | 2232 | 2397 | 7.43309946482 |
| NM_004599    | SREBF2 | 2858 | 2966 | 6.62574454276 |
| NM_004599    | SREBF2 | 3094 | 3195 | 6.62574454276 |
| NM_004599    | SREBF2 | 3461 | 3609 | 6.94767263765 |
| NM_004599    | SREBF2 | 2443 | 2768 | 9.67013866212 |
| NM_004599    | SREBF2 | 607  | 740  | 6.94767263765 |
| NM_004599    | SREBF2 | 1401 | 1867 | 10.4330994648 |
| NM_004599    | SREBF2 | 3895 | 4044 | 8.53263513837 |
| NM_004599    | SREBF2 | 3643 | 3695 | 5.62172694259 |
| NM_015607    | CHTOP  | 1423 | 1503 | 6.51435092399 |
| NM_015607    | CHTOP  | 998  | 1043 | 7.51435092399 |
| NM_015607    | CHTOP  | 1558 | 1626 | 7.51435069562 |
| NM_015607    | CHTOP  | 182  | 236  | 7.51435093154 |

|              |         |       |       |               |
|--------------|---------|-------|-------|---------------|
| NM_015607    | CHTOP   | 791   | 860   | 7.43021172215 |
| NM_015607    | CHTOP   | 1051  | 1245  | 9.68427593298 |
| NM_020162    | DHX33   | 3502  | 3545  | 6.36057062457 |
| NM_020162    | DHX33   | 4477  | 4556  | 6.36458798882 |
| NM_020162    | DHX33   | 2138  | 2215  | 6.28044901536 |
| NM_020162    | DHX33   | 3077  | 3144  | 6.36057062457 |
| NM_020162    | DHX33   | 4006  | 4146  | 8.94955072546 |
| NM_020162    | DHX33   | 630   | 712   | 6.36057062457 |
| NM_020162    | DHX33   | 745   | 927   | 9.1719431468  |
| NM_001173989 | C9orf86 | 386   | 488   | 3.24853555736 |
| NM_001173989 | C9orf86 | 778   | 891   | 3.24853555736 |
| NM_001173989 | C9orf86 | 209   | 251   | 2.24451795719 |
| NM_001173989 | C9orf86 | 650   | 759   | 4.24853555736 |
| NM_001199682 | RWDD3   | 775   | 838   | 6.49731419064 |
| NM_016252    | BIRC6   | 2493  | 2519  | 6.65321665575 |
| NM_016252    | BIRC6   | 5579  | 5622  | 6.65723402001 |
| NM_016252    | BIRC6   | 7708  | 7771  | 6.57309504654 |
| NM_016252    | BIRC6   | 9464  | 9564  | 7.97916211489 |
| NM_016252    | BIRC6   | 4840  | 4880  | 6.65722752487 |
| NM_016252    | BIRC6   | 4478  | 4536  | 6.65321665575 |
| NM_016252    | BIRC6   | 7400  | 7471  | 6.65321665575 |
| NM_016252    | BIRC6   | 6212  | 6251  | 5.65321665575 |
| NM_016252    | BIRC6   | 5274  | 5325  | 6.65321665575 |
| NM_016252    | BIRC6   | 8353  | 8390  | 7.57309504654 |
| NM_016252    | BIRC6   | 2601  | 2660  | 7.65723424838 |
| NM_016252    | BIRC6   | 10226 | 10346 | 7.65723425593 |
| NM_016252    | BIRC6   | 7271  | 7333  | 6.65321665575 |
| NM_016252    | BIRC6   | 1095  | 1185  | 8.24219675665 |
| NM_016252    | BIRC6   | 6427  | 6507  | 7.24219675664 |
| NM_016252    | BIRC6   | 11357 | 11401 | 6.65706050561 |
| NM_016252    | BIRC6   | 14662 | 14746 | 6.65722752487 |
| NM_016252    | BIRC6   | 10346 | 10476 | 6.65723425593 |
| NM_016252    | BIRC6   | 868   | 936   | 7.65722752487 |
| NM_016252    | BIRC6   | 14294 | 14371 | 6.65722752487 |
| NM_016252    | BIRC6   | 11260 | 11319 | 7.24202300633 |
| NM_016252    | BIRC6   | 12124 | 12170 | 6.57309504654 |
| NM_016252    | BIRC6   | 14551 | 14614 | 5.65321665575 |
| NM_016252    | BIRC6   | 1482  | 1546  | 5.65706050561 |
| NM_016252    | BIRC6   | 564   | 627   | 6.65723425593 |
| NM_016252    | BIRC6   | 2218  | 2260  | 6.65321665575 |
| NM_016252    | BIRC6   | 2673  | 2760  | 7.24219002559 |
| NM_016252    | BIRC6   | 459   | 506   | 7.65722752487 |
| NM_016252    | BIRC6   | 1890  | 1991  | 5.65723425593 |
| NM_016252    | BIRC6   | 7806  | 7911  | 7.65723424838 |
| NM_016252    | BIRC6   | 8768  | 8873  | 7.97916235081 |
| NM_016252    | BIRC6   | 5453  | 5570  | 7.24219675665 |
| NM_016252    | BIRC6   | 2347  | 2486  | 8.65723425593 |
| NM_016252    | BIRC6   | 6258  | 6339  | 5.65723402001 |
| NM_016255    | FAM8A1  | 3521  | 3560  | 7.83431870033 |
| NM_016255    | FAM8A1  | 927   | 990   | 9.50342041043 |

|           |          |      |      |                    |
|-----------|----------|------|------|--------------------|
| NM_016255 | FAM8A1   | 1202 | 1251 | 8.91845790972      |
| NM_016255 | FAM8A1   | 3654 | 3741 | 7.91845790972      |
| NM_016255 | FAM8A1   | 4001 | 4031 | 6.9182841594       |
| NM_016255 | FAM8A1   | 1001 | 1062 | 9.50342041044      |
| NM_016255 | FAM8A1   | 1458 | 1514 | 8.91845790972      |
| NM_016255 | FAM8A1   | 1302 | 1394 | 9.91845790972      |
| NM_016255 | FAM8A1   | 859  | 903  | 8.91845790217      |
| NM_016255 | FAM8A1   | 469  | 513  | 8.49940281027      |
| NM_016255 | FAM8A1   | 2665 | 2751 | 9.50342041044      |
| NM_016255 | FAM8A1   | 1097 | 1198 | 9.50342041044      |
| NM_016255 | FAM8A1   | 1762 | 1859 | 7.91845790971      |
| NM_016255 | FAM8A1   | 4085 | 4184 | 7.91845790971      |
| NM_004355 | CD74     | 586  | 624  | 4.14613353128      |
| NM_004355 | CD74     | 393  | 479  | 5.81523500547      |
| NM_004355 | CD74     | 323  | 373  | 5.23027274045      |
| NM_004355 | CD74     | 1166 | 1229 | 6.23009899035      |
| NM_004355 | CD74     | 655  | 767  | 6.55220083556      |
| NM_016256 | NAGPA    | 1257 | 1305 | 7.96793915511      |
| NM_016256 | NAGPA    | 565  | 647  | 7.96793915511      |
| NM_016256 | NAGPA    | 849  | 913  | 7.38297664684      |
| NM_016256 | NAGPA    | 1009 | 1063 | 6.37895905422      |
| NM_016256 | NAGPA    | 926  | 973  | 7.29883744501      |
| NM_016256 | NAGPA    | 1972 | 2024 | 6.38297665439      |
| NM_007266 | GPN1     | 785  | 830  | 4.51959612633      |
| NM_007266 | GPN1     | 291  | 356  | 4.5197698691       |
| NM_007266 | GPN1     | 1000 | 1106 | 4.5197698691       |
| NM_003569 | STX7     | 1485 | 1534 | 3.94494904705      |
| NM_003569 | STX7     | 327  | 401  | 4.86482743784      |
| NM_003569 | STX7     | 805  | 859  | 4.94896663968      |
| NM_003569 | STX7     | 1718 | 1786 | 3.94895991617      |
| NM_003569 | STX7     | 709  | 802  | 4.94494904705      |
| NM_020382 | SETD8    | 1982 | 2031 | 5.22886279552      |
| NM_020382 | SETD8    | 889  | 1017 | 6.22886280307      |
| NM_020382 | SETD8    | 301  | 387  | 5.22886280284      |
| NM_020382 | SETD8    | 1196 | 1323 | 7.55079089795      |
| NM_014252 | SLC25A15 |      | 1768 | 1814 5.20127692149 |
| NM_020385 | REX04    | 1102 | 1154 | 6.14215461745      |
| NM_020385 | REX04    | 1400 | 1440 | 6.1381370175       |
| NM_000292 | PHKA2    | 2723 | 2784 | 4.55057122377      |
| NM_000292 | PHKA2    | 229  | 289  | 4.6347037021       |
| NM_000292 | PHKA2    | 1355 | 1444 | 6.21966620282      |
| NM_000292 | PHKA2    | 1021 | 1093 | 4.6347037021       |
| NM_000292 | PHKA2    | 2260 | 2321 | 6.21967269796      |
| NM_000291 | PGK1     | 503  | 603  | 3.16870966603      |
| NM_000291 | PGK1     | 1545 | 1676 | 3.45821628322      |
| NM_000291 | PGK1     | 1388 | 1502 | 2.99878466459      |
| NM_000291 | PGK1     | 1677 | 1823 | 4.24671217803      |
| NM_000291 | PGK1     | 697  | 1385 | 6.02115247761      |
| NM_000291 | PGK1     | 88   | 496  | 5.49063776091      |
| NM_012160 | FBXL4    | 1118 | 1186 | 9.09519732378      |

|              |          |      |      |               |                 |
|--------------|----------|------|------|---------------|-----------------|
| NM_012160    | FBXL4    | 402  | 461  | 7.09502357347 |                 |
| NM_012160    | FBXL4    | 1484 | 1539 | 7.09117972361 |                 |
| NM_012160    | FBXL4    | 1373 | 1480 | 9.09519732378 |                 |
| NM_000295    | SERPINA1 |      | 2896 | 2974          | 1.305772396     |
| NM_000295    | SERPINA1 |      | 2134 | 2177          | 0.890734896497  |
| NM_000295    | SERPINA1 |      | 2089 | 2130          | 0.221633186614  |
| NM_000295    | SERPINA1 |      | 2274 | 2354          | 0.890734896719  |
| NM_000295    | SERPINA1 |      | 2507 | 2555          | 0.305772395992  |
| NM_000295    | SERPINA1 |      | 2993 | 3141          | 1.89073489672   |
| NM_000295    | SERPINA1 |      | 2653 | 2726          | -0.694234335056 |
| NM_000295    | SERPINA1 |      | 141  | 1736          | 7.37723475855   |
| NM_000295    | SERPINA1 |      | 1994 | 2073          | 0.305772395992  |
| NM_000295    | SERPINA1 |      | 47   | 133           | -0.694227604002 |
| NM_003193    | TBCE     | 390  | 478  | 6.97416015865 |                 |
| NM_001619    | ADRBK1   | 704  | 769  | 6.30796513603 |                 |
| NM_001619    | ADRBK1   | 987  | 1033 | 7.30796513603 |                 |
| NM_001619    | ADRBK1   | 597  | 642  | 4.63886342592 |                 |
| NM_001619    | ADRBK1   | 3330 | 3418 | 7.04493073019 |                 |
| NM_001619    | ADRBK1   | 2706 | 2756 | 4.72300263509 |                 |
| NM_001619    | ADRBK1   | 261  | 329  | 7.04493073019 |                 |
| NM_001619    | ADRBK1   | 2480 | 2504 | 4.72282888499 |                 |
| NM_001619    | ADRBK1   | 386  | 575  | 8.53035755737 |                 |
| NM_001619    | ADRBK1   | 2788 | 2829 | 5.71898503513 |                 |
| NM_001619    | ADRBK1   | 2316 | 2360 | 4.72300262776 |                 |
| NM_001619    | ADRBK1   | 2367 | 2411 | 5.72300239939 |                 |
| NM_001619    | ADRBK1   | 2246 | 2296 | 4.72300239939 |                 |
| NM_001619    | ADRBK1   | 3064 | 3103 | 5.71898503513 |                 |
| NM_001619    | ADRBK1   | 842  | 984  | 7.53035755737 |                 |
| NM_001619    | ADRBK1   | 1316 | 1420 | 7.53035755737 |                 |
| NM_001619    | ADRBK1   | 2833 | 3053 | 8.62989323092 |                 |
| NM_001619    | ADRBK1   | 1062 | 1292 | 8.04493073019 |                 |
| NM_001619    | ADRBK1   | 1704 | 1896 | 7.89292763675 |                 |
| NM_001619    | ADRBK1   | 2508 | 2659 | 5.72300263531 |                 |
| NM_001619    | ADRBK1   | 2076 | 2222 | 7.53035755737 |                 |
| NM_001619    | ADRBK1   | 1436 | 1669 | 8.72300263531 |                 |
| NM_001619    | ADRBK1   | 774  | 839  | 6.30796513602 |                 |
| NM_001619    | ADRBK1   | 1898 | 1973 | 5.72300263531 |                 |
| NM_003194    | TBP      | 1757 | 1880 | 6.42111512241 |                 |
| NM_003194    | TBP      | 776  | 832  | 6.41709752225 |                 |
| NM_014746    | RNF144A  | 4593 | 4630 | 11.0713243357 |                 |
| NM_003921    | BCL10    | 775  | 831  | 5.52721904751 |                 |
| NM_003921    | BCL10    | 699  | 750  | 5.61135152584 |                 |
| NM_001194937 | POGZ     | 2578 | 2641 | 6.62278564403 |                 |
| NM_001194937 | POGZ     | 4690 | 4763 | 7.20774814475 |                 |
| NM_001194937 | POGZ     | 3344 | 3420 | 7.2077548758  |                 |
| NM_001194937 | POGZ     | 365  | 403  | 5.61877477491 |                 |
| NM_001194937 | POGZ     | 1599 | 1674 | 7.2077548758  |                 |
| NM_001194937 | POGZ     | 1682 | 1731 | 6.61877477491 |                 |
| NM_001194937 | POGZ     | 4392 | 4433 | 5.61877477491 |                 |
| NM_001194937 | POGZ     | 2228 | 2293 | 6.61877477491 |                 |



|              |        |       |       |               |
|--------------|--------|-------|-------|---------------|
| NM_001194937 | POGZ   | 1964  | 1993  | 5.5386531657  |
| NM_001194937 | POGZ   | 6266  | 6328  | 5.62278564403 |
| NM_001194937 | POGZ   | 4913  | 4954  | 5.62261862477 |
| NM_001194937 | POGZ   | 3176  | 3212  | 5.61877477491 |
| NM_001194937 | POGZ   | 4066  | 4119  | 6.62278564403 |
| NM_001194937 | POGZ   | 4964  | 5000  | 5.62261862477 |
| NM_001194937 | POGZ   | 3604  | 3779  | 8.2077548758  |
| NM_003922    | HERC1  | 13337 | 13414 | 6.83603614576 |
| NM_003922    | HERC1  | 2839  | 2951  | 8.50513761995 |
| NM_003922    | HERC1  | 3921  | 4010  | 8.50513785586 |
| NM_003922    | HERC1  | 11796 | 11898 | 6.92017535514 |
| NM_003925    | MBD4   | 1071  | 1115  | 5.88583351315 |
| NM_003925    | MBD4   | 2224  | 2272  | 6.88583351315 |
| NM_003925    | MBD4   | 1820  | 2021  | 8.47481361405 |
| NM_003925    | MBD4   | 321   | 418   | 7.4748136065  |
| NM_003925    | MBD4   | 2028  | 2109  | 5.88985111332 |
| NM_003925    | MBD4   | 1655  | 1787  | 7.47481361405 |
| NM_006736    | DNAJB2 | 696   | 778   | 7.73069954167 |
| NM_006736    | DNAJB2 | 376   | 495   | 8.46766513583 |
| NM_006736    | DNAJB2 | 2518  | 2560  | 7.73069281061 |
| NM_006736    | DNAJB2 | 2573  | 2604  | 6.14556329063 |
| NM_006736    | DNAJB2 | 644   | 694   | 8.14573704094 |
| NM_006736    | DNAJB2 | 566   | 630   | 6.06159783156 |
| NM_006736    | DNAJB2 | 853   | 918   | 7.14573030989 |
| NM_006736    | DNAJB2 | 242   | 326   | 8.14573704094 |
| NM_003927    | MBD2   | 1891  | 1936  | 5.02199555015 |
| NM_003927    | MBD2   | 1398  | 1444  | 6.01815170029 |
| NM_003927    | MBD2   | 1084  | 1143  | 7.02216930046 |
| NM_003927    | MBD2   | 1231  | 1317  | 6.60712507013 |
| NM_006734    | HIVEP2 | 5602  | 5669  | 5.60325634306 |
| NM_003929    | RAB7L1 | 455   | 506   | 9.0336958721  |
| NM_003929    | RAB7L1 | 1173  | 1208  | 8.36460089305 |
| NM_003929    | RAB7L1 | 1229  | 1333  | 8.44874010243 |
| NM_003929    | RAB7L1 | 529   | 618   | 9.77066146627 |
| NM_006739    | MCM5   | 2440  | 2511  | 5.76546771887 |
| NM_006739    | MCM5   | 228   | 369   | 7.35060396991 |
| NM_006739    | MCM5   | 1299  | 1360  | 5.76564146896 |
| NM_006739    | MCM5   | 2167  | 2206  | 4.76563473813 |
| NM_006739    | MCM5   | 840   | 909   | 5.76564146918 |
| NM_006739    | MCM5   | 1683  | 1764  | 6.35060396991 |
| NM_006739    | MCM5   | 1381  | 1461  | 4.76564146918 |
| NM_006739    | MCM5   | 715   | 796   | 6.35060396991 |
| NM_006739    | MCM5   | 1777  | 1897  | 7.08756956407 |
| NM_006739    | MCM5   | 1468  | 1555  | 6.76564146918 |
| NM_006739    | MCM5   | 461   | 580   | 7.35060396991 |
| NM_006739    | MCM5   | 1162  | 1270  | 7.76564146918 |
| NM_006739    | MCM5   | 1556  | 1663  | 7.08756956407 |
| NM_006739    | MCM5   | 2300  | 2426  | 4.76564146918 |
| NM_004429    | EFNB1  | 1504  | 1572  | 8.94902733964 |
| NM_001130107 | KLC1   | 1416  | 1486  | 4.84744745312 |

|              |         |      |      |               |
|--------------|---------|------|------|---------------|
| NM_001130107 | KLC1    | 1240 | 1302 | 3.84342985294 |
| NM_001130107 | KLC1    | 591  | 651  | 5.43240971792 |
| NM_001130107 | KLC1    | 61   | 89   | 3.76330824373 |
| NM_001130107 | KLC1    | 1973 | 2018 | 3.76330824373 |
| NM_001130107 | KLC1    | 291  | 385  | 4.84744745312 |
| NM_001130107 | KLC1    | 1111 | 1219 | 5.43240995384 |
| NM_001130107 | KLC1    | 506  | 579  | 4.84744072206 |
| NM_001130107 | KLC1    | 1510 | 1615 | 5.43240995384 |
| NM_001130107 | KLC1    | 1862 | 1929 | 4.84342985294 |
| NM_002035    | KDSR    | 960  | 1005 | 8.2458748685  |
| NM_002035    | KDSR    | 1049 | 1137 | 7.50890928188 |
| NM_002035    | KDSR    | 307  | 373  | 7.50890255083 |
| NM_002035    | KDSR    | 424  | 466  | 5.91992918099 |
| NM_002035    | KDSR    | 1571 | 1678 | 7.92394678116 |
| NM_002031    | FRK     | 1770 | 1820 | 9.58014464967 |
| NM_002031    | FRK     | 207  | 239  | 7.91104294712 |
| NM_002031    | FRK     | 744  | 812  | 8.99116455633 |
| NM_002031    | FRK     | 447  | 514  | 9.5799709069  |
| NM_002031    | FRK     | 1840 | 1922 | 9.58014465722 |
| NM_002031    | FRK     | 982  | 1071 | 9.9951821565  |
| NM_002031    | FRK     | 1548 | 1621 | 8.99116455633 |
| NM_002031    | FRK     | 583  | 667  | 8.9951821565  |
| NM_002031    | FRK     | 2316 | 2464 | 8.99518215628 |
| NM_002031    | FRK     | 1314 | 1397 | 8.99517542545 |
| NM_002031    | FRK     | 272  | 403  | 9.9951821565  |
| NM_002032    | FTH1    | 869  | 929  | 1.46443091093 |
| NM_002032    | FTH1    | 33   | 194  | 1.81235421435 |
| NM_002032    | FTH1    | 211  | 823  | 4.69149981948 |
| NM_007265    | ECD     | 1743 | 1839 | 7.37893503422 |
| NM_007265    | ECD     | 1567 | 1613 | 5.78995493333 |
| NM_007265    | ECD     | 545  | 637  | 6.7939725335  |
| NM_007265    | ECD     | 1121 | 1308 | 9.11590062839 |
| NM_007265    | ECD     | 1977 | 2048 | 5.79379878319 |
| NM_007265    | ECD     | 1321 | 1394 | 6.79396580245 |
| NM_024715    | TXNDC15 | 1045 | 1090 | 5.75382215735 |
| NM_024715    | TXNDC15 | 1133 | 1196 | 6.33878465807 |
| NM_024715    | TXNDC15 | 1585 | 1646 | 5.75382192143 |
| NM_024715    | TXNDC15 | 1814 | 1854 | 6.33877792702 |
| NM_024715    | TXNDC15 | 892  | 975  | 7.07575025224 |
| NM_024715    | TXNDC15 | 1677 | 1781 | 7.56117707941 |
| NM_024715    | TXNDC15 | 1475 | 1584 | 5.75382215735 |
| NM_024715    | TXNDC15 | 694  | 806  | 7.07575025224 |
| NM_024715    | TXNDC15 | 1218 | 1410 | 8.75382215735 |
| NM_024715    | TXNDC15 | 3009 | 3060 | 4.74980455718 |
| NM_007026    | DUSP14  | 533  | 578  | 8.14967189693 |
| NM_007027    | TOPBP1  | 4825 | 4882 | 7.11311392252 |
| NM_007027    | TOPBP1  | 1968 | 2036 | 7.1972531319  |
| NM_007027    | TOPBP1  | 3219 | 3264 | 7.19323553173 |
| NM_007027    | TOPBP1  | 4739 | 4821 | 7.78221563263 |
| NM_007027    | TOPBP1  | 945  | 1035 | 6.19725289599 |

|              |         |      |      |               |
|--------------|---------|------|------|---------------|
| NM_007027    | TOPBP1  | 3961 | 4016 | 7.19323553173 |
| NM_007027    | TOPBP1  | 2387 | 2442 | 7.19323553173 |
| NM_007027    | TOPBP1  | 684  | 757  | 7.19323553173 |
| NM_007027    | TOPBP1  | 1638 | 1672 | 6.11311392252 |
| NM_007027    | TOPBP1  | 2049 | 2094 | 6.19724640085 |
| NM_007027    | TOPBP1  | 2209 | 2265 | 6.19323553173 |
| NM_007027    | TOPBP1  | 2451 | 2527 | 8.19724640085 |
| NM_007027    | TOPBP1  | 277  | 345  | 7.19725312436 |
| NM_007027    | TOPBP1  | 3700 | 3795 | 7.78221563263 |
| NM_007027    | TOPBP1  | 4131 | 4296 | 8.78221563263 |
| NM_024719    | GRTP1   | 1140 | 1206 | 7.42729945971 |
| NM_024719    | GRTP1   | 596  | 656  | 7.84233695899 |
| NM_024719    | GRTP1   | 400  | 524  | 6.84233696654 |
| NM_024719    | GRTP1   | 694  | 781  | 7.42729946726 |
| NM_024719    | GRTP1   | 798  | 902  | 7.84233696654 |
| NM_030798    | WBSCR16 | 1625 | 1692 | 5.90899235355 |
| NM_030798    | WBSCR16 | 2265 | 2326 | 8.7163472756  |
| NM_030798    | WBSCR16 | 798  | 849  | 6.90899211763 |
| NM_030798    | WBSCR16 | 1152 | 1251 | 8.90899235355 |
| NM_030798    | WBSCR16 | 419  | 605  | 8.7163472756  |
| NM_030798    | WBSCR16 | 862  | 950  | 5.90899235355 |
| NM_030798    | WBSCR16 | 1464 | 1497 | 7.49394812321 |
| NM_030798    | WBSCR16 | 1338 | 1373 | 5.90497475337 |
| NM_030798    | WBSCR16 | 708  | 779  | 5.82485314416 |
| NM_030798    | WBSCR16 | 613  | 704  | 8.49395485404 |
| NM_030798    | WBSCR16 | 79   | 191  | 7.49395485427 |
| NM_030798    | WBSCR16 | 1041 | 1116 | 6.90899235355 |
| NM_030798    | WBSCR16 | 1719 | 1996 | 9.49395485427 |
| NM_030798    | WBSCR16 | 299  | 363  | 6.90497475337 |
| NM_005262    | GFER    | 635  | 683  | 6.50773021207 |
| NM_001130702 | BSCL2   | 407  | 454  | 10.2688563691 |
| NM_001130702 | BSCL2   | 335  | 373  | 8.68389364004 |
| NM_001130702 | BSCL2   | 490  | 583  | 10.2688563767 |
| NM_001130702 | BSCL2   | 722  | 809  | 9.68389387595 |
| NM_001130702 | BSCL2   | 635  | 691  | 8.68372012564 |
| NM_001130702 | BSCL2   | 1172 | 1293 | 10.683893876  |
| NM_001167582 | RBM6    | 2166 | 2210 | 3.75582017092 |
| NM_152437    | ZNF664  | 2394 | 2443 | 8.2212802755  |
| NM_152437    | ZNF664  | 384  | 422  | 9.22512412536 |
| NM_152437    | ZNF664  | 2458 | 2544 | 9.54722597056 |
| NM_152437    | ZNF664  | 2309 | 2356 | 7.2212802755  |
| NM_152437    | ZNF664  | 1548 | 1644 | 7.22529787567 |
| NM_152437    | ZNF664  | 2690 | 2763 | 9.81026037639 |
| NM_152437    | ZNF664  | 3299 | 3387 | 7.22529786812 |
| NM_152437    | ZNF664  | 212  | 384  | 10.6847294943 |
| NM_152437    | ZNF664  | 1973 | 2072 | 9.81026037639 |
| NM_152437    | ZNF664  | 3459 | 3682 | 9.54722597056 |
| NM_152437    | ZNF664  | 716  | 856  | 9.22529787567 |
| NM_152437    | ZNF664  | 2211 | 2292 | 8.22529787567 |
| NM_203472    | SELS    | 345  | 380  | 3.81132847805 |

|              |          |      |      |                    |
|--------------|----------|------|------|--------------------|
| NM_203472    | SELS     | 1190 | 1236 | 3.8113284856       |
| NM_203472    | SELS     | 522  | 579  | 4.396117236        |
| NM_203472    | SELS     | 277  | 338  | 4.81132824968      |
| NM_203472    | SELS     | 596  | 682  | 2.81132175455      |
| NM_203472    | SELS     | 394  | 483  | 2.8113284856       |
| NM_032127    | FAM160A2 |      | 2382 | 2438 11.2587321789 |
| NM_032127    | FAM160A2 |      | 1518 | 1591 10.6777870424 |
| NM_001214906 | ZNF48    | 648  | 719  | 8.98878302208      |
| NM_000273    | GPR143   | 974  | 1063 | 12.9311173352      |
| NM_000273    | GPR143   | 607  | 659  | 11.3461481034      |
| NM_000273    | GPR143   | 1402 | 1472 | 13.9311173352      |
| NM_000273    | GPR143   | 782  | 825  | 12.9311106041      |
| NM_000273    | GPR143   | 1210 | 1282 | 12.3461548269      |
| NM_000273    | GPR143   | 361  | 607  | 14.9311173352      |
| NM_001166621 | TRAPPC1  | 163  | 194  | 7.84234424678      |
| NM_001166621 | TRAPPC1  | 57   | 138  | 8.25738175361      |
| NM_001166621 | TRAPPC1  | 253  | 588  | 10.2573817536      |
| NM_020761    | RPTOR    | 1848 | 1917 | 6.95499300628      |
| NM_020761    | RPTOR    | 1668 | 1722 | 7.5401290214       |
| NM_020761    | RPTOR    | 733  | 786  | 5.95516002555      |
| NM_020761    | RPTOR    | 532  | 570  | 5.95516002555      |
| NM_020761    | RPTOR    | 2936 | 3032 | 6.95516002555      |
| NM_020761    | RPTOR    | 2342 | 2432 | 6.9551667566       |
| NM_020761    | RPTOR    | 4216 | 4285 | 5.87102754722      |
| NM_001671    | ASGR1    | 688  | 755  | 2.46611949166      |
| NM_001671    | ASGR1    | 232  | 384  | 3.88115699094      |
| NM_001671    | ASGR1    | 758  | 965  | 4.88115699094      |
| NM_001671    | ASGR1    | 1331 | 1485 | 2.46611949166      |
| NM_001671    | ASGR1    | 406  | 657  | 4.46611949166      |
| NM_001671    | ASGR1    | 965  | 1215 | 4.05108199238      |
| NM_006197    | PCM1     | 3371 | 3443 | 2.81591873773      |
| NM_006197    | PCM1     | 4830 | 4880 | 4.40088100276      |
| NM_006197    | PCM1     | 1711 | 1750 | 4.3968636385       |
| NM_006197    | PCM1     | 1662 | 1700 | 4.31674202929      |
| NM_006197    | PCM1     | 447  | 522  | 3.81190113778      |
| NM_006197    | PCM1     | 4658 | 4729 | 2.8159120069       |
| NM_006197    | PCM1     | 5416 | 5461 | 3.8159120069       |
| NM_006197    | PCM1     | 4985 | 5035 | 2.81190113778      |
| NM_006197    | PCM1     | 4890 | 4936 | 4.81591850203      |
| NM_006197    | PCM1     | 4211 | 4304 | 2.81591873773      |
| NM_006196    | PCBP1    | 861  | 905  | 2.93156955128      |
| NM_006196    | PCBP1    | 1374 | 1443 | 6.63201600048      |
| NM_006196    | PCBP1    | 1567 | 1716 | 6.63201600048      |
| NM_006196    | PCBP1    | 1465 | 1555 | 4.93157628233      |
| NM_006196    | PCBP1    | 1308 | 1373 | 4.51653878305      |
| NM_006196    | PCBP1    | 1194 | 1241 | 2.92755868216      |
| NM_006196    | PCBP1    | 233  | 569  | 7.63201600048      |
| NM_006196    | PCBP1    | 614  | 693  | 2.93140253202      |
| NM_006196    | PCBP1    | 725  | 823  | 4.93157628233      |
| NM_006196    | PCBP1    | 922  | 1190 | 7.57543247211      |

|           |         |      |      |               |
|-----------|---------|------|------|---------------|
| NM_006191 | PA2G4   | 535  | 581  | 3.96132060857 |
| NM_006191 | PA2G4   | 415  | 481  | 4.96132733962 |
| NM_006191 | PA2G4   | 2399 | 2440 | 3.96132060857 |
| NM_006191 | PA2G4   | 1224 | 1356 | 6.13125234107 |
| NM_006191 | PA2G4   | 2090 | 2139 | 4.95730973945 |
| NM_006191 | PA2G4   | 1029 | 1208 | 6.76868226168 |
| NM_006191 | PA2G4   | 1771 | 1836 | 4.96132710371 |
| NM_006191 | PA2G4   | 1647 | 1698 | 4.54628984012 |
| NM_006191 | PA2G4   | 858  | 959  | 5.28325543451 |
| NM_006191 | PA2G4   | 258  | 365  | 4.96132733962 |
| NM_006191 | PA2G4   | 1535 | 1607 | 4.54628984035 |
| NM_006191 | PA2G4   | 1412 | 1518 | 4.54628984035 |
| NM_006191 | PA2G4   | 1952 | 2050 | 2.96132733962 |
| NM_006191 | PA2G4   | 698  | 845  | 6.13125234107 |
| NM_006190 | ORC2    | 188  | 254  | 5.76690091892 |
| NM_006190 | ORC2    | 2233 | 2296 | 5.76690069055 |
| NM_006190 | ORC2    | 2132 | 2189 | 5.76288332629 |
| NM_006190 | ORC2    | 462  | 502  | 4.76672717615 |
| NM_006190 | ORC2    | 2064 | 2130 | 4.76690069055 |
| NM_006190 | ORC2    | 1589 | 1661 | 4.68276171708 |
| NM_207346 | TSEN54  | 1281 | 1365 | 7.94494452671 |
| NM_207346 | TSEN54  | 374  | 433  | 8.94494452671 |
| NM_207346 | TSEN54  | 1568 | 1629 | 7.94477750745 |
| NM_207346 | TSEN54  | 1439 | 1557 | 9.94495125777 |
| NM_207346 | TSEN54  | 1727 | 1888 | 8.94495125777 |
| NM_004282 | BAG2    | 855  | 947  | 5.67248768949 |
| NM_004282 | BAG2    | 573  | 789  | 7.48386021172 |
| NM_207342 | STEAP1B | 566  | 647  | 9.19985818262 |
| NM_207342 | STEAP1B | 822  | 901  | 11.0072131047 |
| NM_207342 | STEAP1B | 749  | 819  | 10.3697831841 |
| NM_207342 | STEAP1B | 383  | 471  | 8.19985818262 |
| NM_207340 | ZDHHC24 | 374  | 434  | 12.8386943878 |
| NM_207340 | ZDHHC24 | 207  | 263  | 10.8346767877 |
| NM_207340 | ZDHHC24 | 816  | 863  | 10.8386941519 |
| NM_207340 | ZDHHC24 | 613  | 704  | 11.8386943878 |
| NM_207340 | ZDHHC24 | 704  | 813  | 13.1606224827 |
| NM_207340 | ZDHHC24 | 543  | 608  | 12.8385206375 |
| NM_014674 | EDEM1   | 1023 | 1112 | 8.80837262962 |
| NM_014674 | EDEM1   | 1161 | 1206 | 7.8081988793  |
| NM_014674 | EDEM1   | 656  | 703  | 8.80836589857 |
| NM_014674 | EDEM1   | 3355 | 3395 | 6.72423342024 |
| NM_014674 | EDEM1   | 849  | 918  | 6.80435502945 |
| NM_014674 | EDEM1   | 1750 | 1830 | 9.13030072451 |
| NM_014674 | EDEM1   | 5058 | 5143 | 7.80837262962 |
| NM_014674 | EDEM1   | 4425 | 4521 | 7.80435502945 |
| NM_014674 | EDEM1   | 5313 | 5401 | 7.80837262962 |
| NM_014674 | EDEM1   | 1389 | 1498 | 8.80837262962 |
| NM_014674 | EDEM1   | 5687 | 5763 | 7.8081988793  |
| NM_014676 | PUM1    | 2637 | 2688 | 5.63568002001 |
| NM_014676 | PUM1    | 761  | 811  | 6.22466012069 |

|           |          |      |      |               |               |
|-----------|----------|------|------|---------------|---------------|
| NM_014676 | PUM1     | 1820 | 1892 | 6.22466011336 |               |
| NM_014676 | PUM1     | 3908 | 3959 | 5.63969738427 |               |
| NM_014676 | PUM1     | 3739 | 3792 | 4.63952386987 |               |
| NM_014676 | PUM1     | 2808 | 2885 | 6.2246601209  |               |
| NM_014676 | PUM1     | 428  | 479  | 5.63969088913 |               |
| NM_014676 | PUM1     | 123  | 174  | 4.63568002001 |               |
| NM_014676 | PUM1     | 2355 | 2424 | 5.63969761996 |               |
| NM_014676 | PUM1     | 4552 | 4607 | 5.63969761264 |               |
| NM_014676 | PUM1     | 2986 | 3025 | 5.63568002001 |               |
| NM_014676 | PUM1     | 3230 | 3284 | 4.5555584108  |               |
| NM_014676 | PUM1     | 1758 | 1798 | 5.63969761264 |               |
| NM_014676 | PUM1     | 5297 | 5392 | 4.63969762018 |               |
| NM_014676 | PUM1     | 2521 | 2632 | 6.22466012091 |               |
| NM_014676 | PUM1     | 909  | 961  | 4.5555584108  |               |
| NM_014676 | PUM1     | 837  | 905  | 4.63969762018 |               |
| NM_014676 | PUM1     | 4445 | 4549 | 6.22466012091 |               |
| NM_014676 | PUM1     | 1007 | 1052 | 5.5555584108  |               |
| NM_014671 | UBE3C    | 2163 | 2223 | 5.08778986919 |               |
| NM_014671 | UBE3C    | 4755 | 4811 | 6.67275236991 |               |
| NM_014671 | UBE3C    | 3728 | 3790 | 6.67275236991 |               |
| NM_014671 | UBE3C    | 1854 | 1918 | 6.67275236991 |               |
| NM_014671 | UBE3C    | 3521 | 3569 | 6.08778313836 |               |
| NM_014671 | UBE3C    | 743  | 778  | 6.58861316075 |               |
| NM_014671 | UBE3C    | 3639 | 3683 | 5.08778313836 |               |
| NM_014671 | UBE3C    | 4598 | 4690 | 5.08761611909 |               |
| NM_014671 | UBE3C    | 3288 | 3352 | 6.08778986186 |               |
| NM_014671 | UBE3C    | 1295 | 1436 | 7.08778986941 |               |
| NM_014671 | UBE3C    | 2944 | 3027 | 7.08778986186 |               |
| NM_014671 | UBE3C    | 2639 | 2745 | 7.08778986941 |               |
| NM_014671 | UBE3C    | 4158 | 4323 | 7.67275237013 |               |
| NM_014671 | UBE3C    | 1176 | 1246 | 7.08778986186 |               |
| NM_014672 | KIAA0391 |      | 1851 | 1955          | 8.95808885221 |
| NM_014672 | KIAA0391 |      | 1022 | 1095          | 6.63214315715 |
| NM_014672 | KIAA0391 |      | 489  | 542           | 6.6361607571  |
| NM_014672 | KIAA0391 |      | 575  | 628           | 7.63214315715 |
| NM_014672 | KIAA0391 |      | 349  | 428           | 8.22112325805 |
| NM_014672 | KIAA0391 |      | 1282 | 1381          | 6.63615402627 |
| NM_014672 | KIAA0391 |      | 2401 | 2483          | 6.63616052141 |
| NM_005567 | LGALS3BP |      | 49   | 126           | 4.27772981583 |
| NM_005567 | LGALS3BP |      | 986  | 1064          | 6.08508473789 |
| NM_005567 | LGALS3BP |      | 2202 | 2256          | 5.27772981583 |
| NM_005567 | LGALS3BP |      | 126  | 553           | 8.67004723861 |
| NM_005567 | LGALS3BP |      | 913  | 979           | 5.27772981583 |
| NM_005567 | LGALS3BP |      | 1871 | 2201          | 8.032617318   |
| NM_005567 | LGALS3BP |      | 569  | 876           | 8.18462041144 |
| NM_005567 | LGALS3BP |      | 1127 | 1843          | 9.65276924718 |
| NM_005564 | LCN2     | 40   | 405  | 15.6125523979 |               |
| NM_005564 | LCN2     | 408  | 688  | 15.3553945584 |               |
| NM_005563 | STMN1    | 450  | 516  | 3.33185782539 |               |
| NM_005563 | STMN1    | 149  | 194  | 3.65378592005 |               |

|           |       |       |       |               |
|-----------|-------|-------|-------|---------------|
| NM_005563 | STMN1 | 195   | 361   | 4.79128944402 |
| NM_005563 | STMN1 | 517   | 873   | 6.13921274744 |
| NM_005563 | STMN1 | 86    | 147   | 2.33185782516 |
| NM_005563 | STMN1 | 888   | 1071  | 5.41932066664 |
| NM_005561 | LAMP1 | 301   | 366   | 6.56613255246 |
| NM_005561 | LAMP1 | 116   | 188   | 5.7587776304  |
| NM_005561 | LAMP1 | 367   | 1810  | 11.5203288628 |
| NM_005561 | LAMP1 | 1940  | 2534  | 10.3437401311 |
| NM_005561 | LAMP1 | 1811  | 1908  | 4.7587776304  |
| NM_005560 | LAMA5 | 2584  | 2623  | 8.36959165516 |
| NM_005560 | LAMA5 | 4308  | 4360  | 7.36574780531 |
| NM_005560 | LAMA5 | 2244  | 2291  | 6.36574780531 |
| NM_005560 | LAMA5 | 9888  | 9943  | 7.9547279062  |
| NM_005560 | LAMA5 | 2872  | 2922  | 6.36574780531 |
| NM_005560 | LAMA5 | 4572  | 4611  | 6.28562619609 |
| NM_005560 | LAMA5 | 11206 | 11282 | 9.53969040692 |
| NM_005560 | LAMA5 | 2683  | 2719  | 6.36574780531 |
| NM_005560 | LAMA5 | 1521  | 1588  | 7.36976540526 |
| NM_005560 | LAMA5 | 5971  | 6055  | 8.36976540548 |
| NM_005560 | LAMA5 | 1407  | 1460  | 7.36975867443 |
| NM_005560 | LAMA5 | 6556  | 6628  | 7.95472789865 |
| NM_005560 | LAMA5 | 2496  | 2551  | 7.9547279062  |
| NM_005560 | LAMA5 | 7458  | 7514  | 7.36959165516 |
| NM_005560 | LAMA5 | 7924  | 7973  | 6.36976516956 |
| NM_005560 | LAMA5 | 4842  | 4891  | 6.36976516956 |
| NM_005560 | LAMA5 | 8517  | 8593  | 8.36976540548 |
| NM_005560 | LAMA5 | 5106  | 5163  | 6.36574780531 |
| NM_005560 | LAMA5 | 544   | 584   | 6.36976516956 |
| NM_005560 | LAMA5 | 1772  | 1871  | 8.36976540548 |
| NM_005560 | LAMA5 | 4448  | 4522  | 7.36976540547 |
| NM_005560 | LAMA5 | 8393  | 8466  | 7.36976540548 |
| NM_005560 | LAMA5 | 9598  | 9660  | 8.36976540548 |
| NM_005560 | LAMA5 | 6649  | 6720  | 6.36976540547 |
| NM_005560 | LAMA5 | 722   | 822   | 7.9547279062  |
| NM_005560 | LAMA5 | 4615  | 4680  | 7.9547279062  |
| NM_005560 | LAMA5 | 4063  | 4246  | 8.36976540548 |
| NM_005560 | LAMA5 | 4759  | 4842  | 7.36976516956 |
| NM_005560 | LAMA5 | 1589  | 1660  | 7.95472790598 |
| NM_005560 | LAMA5 | 5610  | 5758  | 7.9547279062  |
| NM_005560 | LAMA5 | 3071  | 3205  | 7.36976540548 |
| NM_005560 | LAMA5 | 8833  | 8926  | 6.36976516956 |
| NM_005560 | LAMA5 | 2063  | 2126  | 7.95472117515 |
| NM_005560 | LAMA5 | 10889 | 10948 | 6.28562619609 |
| NM_005560 | LAMA5 | 3302  | 3363  | 6.36975867443 |
| NM_005560 | LAMA5 | 10655 | 10772 | 7.36976540548 |
| NM_005560 | LAMA5 | 2296  | 2355  | 6.36976540526 |
| NM_005560 | LAMA5 | 7807  | 7909  | 6.36976540548 |
| NM_005560 | LAMA5 | 1949  | 2026  | 7.36959165516 |
| NM_003747 | TNKS  | 1898  | 2020  | 7.33232143048 |
| NM_003747 | TNKS  | 200   | 274   | 6.33232120211 |

|           |        |      |      |               |
|-----------|--------|------|------|---------------|
| NM_003747 | TNKS   | 867  | 972  | 7.9172839312  |
| NM_003746 | DYNLL1 | 66   | 114  | 1.75210430538 |
| NM_003746 | DYNLL1 | 399  | 521  | 3.33706681365 |
| NM_003746 | DYNLL1 | 325  | 366  | 1.08300260283 |
| NM_003746 | DYNLL1 | 188  | 315  | 3.16714181221 |
| NM_003746 | DYNLL1 | 538  | 611  | 1.75209758188 |
| NM_003741 | CHRD   | 1146 | 1223 | 8.43618119795 |
| NM_018571 | STRADB | 1851 | 1903 | 5.53945623553 |
| NM_018571 | STRADB | 1505 | 1583 | 5.54330008538 |
| NM_002291 | LAMB1  | 5694 | 5783 | 2.67283586945 |
| NM_002291 | LAMB1  | 2941 | 3075 | 6.13226748808 |
| NM_002291 | LAMB1  | 3569 | 3630 | 4.99476396433 |
| NM_002291 | LAMB1  | 4865 | 4907 | 2.67282913839 |
| NM_002291 | LAMB1  | 2516 | 2570 | 3.67283586945 |
| NM_002291 | LAMB1  | 4919 | 5001 | 3.67283586945 |
| NM_002291 | LAMB1  | 3668 | 3757 | 5.25779837017 |
| NM_002291 | LAMB1  | 5140 | 5247 | 4.99476396433 |
| NM_002291 | LAMB1  | 5551 | 5649 | 4.25779837017 |
| NM_002291 | LAMB1  | 880  | 1000 | 6.7602987107  |
| NM_002291 | LAMB1  | 5276 | 5332 | 2.67283586945 |
| NM_002291 | LAMB1  | 1001 | 1100 | 5.25779837017 |
| NM_002291 | LAMB1  | 568  | 637  | 5.4801907915  |
| NM_002291 | LAMB1  | 654  | 733  | 5.25779837017 |
| NM_002291 | LAMB1  | 743  | 872  | 6.84276087089 |
| NM_002291 | LAMB1  | 3780 | 3820 | 3.58869666006 |
| NM_002291 | LAMB1  | 4490 | 4603 | 4.25779837017 |
| NM_002291 | LAMB1  | 1110 | 1312 | 6.92076338289 |
| NM_002291 | LAMB1  | 2195 | 2251 | 2.67283563353 |
| NM_002291 | LAMB1  | 1494 | 1665 | 7.42772337161 |
| NM_002291 | LAMB1  | 5376 | 5497 | 5.84276087089 |
| NM_002291 | LAMB1  | 4356 | 4441 | 5.25779837017 |
| NM_002291 | LAMB1  | 4059 | 4272 | 5.99476396433 |
| NM_002291 | LAMB1  | 4605 | 4853 | 6.57972646505 |
| NM_002291 | LAMB1  | 3851 | 3941 | 3.67283586945 |
| NM_002291 | LAMB1  | 2606 | 2935 | 7.06515329222 |
| NM_002291 | LAMB1  | 3962 | 4043 | 4.99476396433 |
| NM_002291 | LAMB1  | 1319 | 1469 | 6.4801907915  |
| NM_002291 | LAMB1  | 386  | 557  | 5.4801907915  |
| NM_002291 | LAMB1  | 3090 | 3252 | 6.84276087089 |
| NM_002291 | LAMB1  | 2317 | 2499 | 7.06515329222 |
| NM_002291 | LAMB1  | 3275 | 3556 | 7.25779837017 |
| NM_002291 | LAMB1  | 1671 | 2187 | 7.88228923507 |
| NM_002292 | LAMB2  | 1433 | 1509 | 3.86255840492 |
| NM_002292 | LAMB2  | 926  | 1037 | 4.86255864084 |
| NM_002292 | LAMB2  | 2066 | 2108 | 3.85854104067 |
| NM_002292 | LAMB2  | 529  | 594  | 5.44350354139 |
| NM_002292 | LAMB2  | 2127 | 2184 | 4.86255864062 |
| NM_002292 | LAMB2  | 1650 | 1703 | 3.85854104067 |
| NM_002292 | LAMB2  | 449  | 518  | 3.86238489052 |
| NM_002292 | LAMB2  | 4798 | 4894 | 3.86255840492 |



|           |         |      |      |               |
|-----------|---------|------|------|---------------|
| NM_002292 | LAMB2   | 2358 | 2435 | 4.86255864084 |
| NM_002293 | LAMC1   | 7634 | 7683 | 4.17152931048 |
| NM_002293 | LAMC1   | 656  | 696  | 2.58656680976 |
| NM_002293 | LAMC1   | 7198 | 7252 | 4.17152931048 |
| NM_002293 | LAMC1   | 7062 | 7102 | 2.58656658139 |
| NM_002293 | LAMC1   | 5085 | 5138 | 3.58656008626 |
| NM_002293 | LAMC1   | 6846 | 6894 | 2.58656681709 |
| NM_002293 | LAMC1   | 5769 | 5846 | 2.58656681731 |
| NM_002293 | LAMC1   | 5167 | 5230 | 4.58656681731 |
| NM_002293 | LAMC1   | 330  | 395  | 2.58656681709 |
| NM_002293 | LAMC1   | 6634 | 6749 | 6.04599843595 |
| NM_002293 | LAMC1   | 4966 | 5074 | 5.17152931803 |
| NM_002293 | LAMC1   | 4316 | 4415 | 5.17152931803 |
| NM_002293 | LAMC1   | 5328 | 5378 | 3.58254921714 |
| NM_002293 | LAMC1   | 2147 | 2328 | 7.34145431947 |
| NM_002293 | LAMC1   | 4529 | 4729 | 6.04599843595 |
| NM_002293 | LAMC1   | 6930 | 7053 | 4.9084949122  |
| NM_002293 | LAMC1   | 6299 | 6338 | 3.58639306699 |
| NM_002293 | LAMC1   | 7257 | 7326 | 5.17152931803 |
| NM_002293 | LAMC1   | 4738 | 4940 | 6.58656681731 |
| NM_002293 | LAMC1   | 3523 | 3725 | 6.75649181875 |
| NM_002293 | LAMC1   | 2330 | 2883 | 8.51730415487 |
| NM_002293 | LAMC1   | 3738 | 4263 | 7.71584983425 |
| NM_002293 | LAMC1   | 6573 | 6633 | 4.17152931781 |
| NM_002293 | LAMC1   | 911  | 1245 | 7.75649181875 |
| NM_002293 | LAMC1   | 2896 | 3504 | 8.75649181875 |
| NM_002293 | LAMC1   | 420  | 595  | 5.39392173937 |
| NM_002293 | LAMC1   | 703  | 898  | 5.75649181875 |
| NM_002293 | LAMC1   | 6120 | 6239 | 4.58656681731 |
| NM_002293 | LAMC1   | 7684 | 7800 | 2.58656681731 |
| NM_002293 | LAMC1   | 1250 | 2120 | 9.34145431947 |
| NM_002293 | LAMC1   | 5951 | 6034 | 4.17152931781 |
| NM_002293 | LAMC1   | 7327 | 7460 | 4.17152931803 |
| NM_144635 | FAM131A | 716  | 780  | 11.3965347787 |
| NM_144635 | FAM131A | 2066 | 2101 | 10.3123958052 |
| NM_002296 | LBR     | 2298 | 2387 | 10.241912031  |
| NM_002296 | LBR     | 2641 | 2747 | 8.9788776252  |
| NM_002296 | LBR     | 3690 | 3754 | 6.65293193014 |
| NM_002296 | LBR     | 3549 | 3645 | 8.9788776252  |
| NM_002296 | LBR     | 3474 | 3540 | 8.65694953031 |
| NM_002296 | LBR     | 2755 | 2806 | 7.6569492944  |
| NM_002296 | LBR     | 2808 | 2876 | 8.65694279926 |
| NM_002296 | LBR     | 418  | 612  | 11.1805114864 |
| NM_002296 | LBR     | 3045 | 3150 | 6.65694953031 |
| NM_002296 | LBR     | 1889 | 2271 | 12.6569495303 |
| NM_002296 | LBR     | 618  | 1861 | 14.6681767857 |
| NM_002296 | LBR     | 58   | 407  | 11.4118370325 |
| NM_005749 | TOB1    | 421  | 449  | 4.88997688549 |
| NM_005749 | TOB1    | 883  | 974  | 7.6973385386  |
| NM_005749 | TOB1    | 658  | 700  | 5.88997688549 |

|           |        |      |      |                 |
|-----------|--------|------|------|-----------------|
| NM_005749 | TOB1   | 1036 | 1100 | 4.88998338062   |
| NM_005749 | TOB1   | 343  | 383  | 5.88980986623   |
| NM_005749 | TOB1   | 1713 | 1786 | 5.88998338062   |
| NM_000101 | CYBA   | 651  | 686  | 6.89409639936   |
| NM_000101 | CYBA   | 60   | 119  | 6.30913413434   |
| NM_000101 | CYBA   | 146  | 494  | 10.1671151297   |
| NM_052875 | VPS26B | 2033 | 2092 | 5.80444355027   |
| NM_052875 | VPS26B | 945  | 984  | 4.72047809121   |
| NM_052874 | STX1B  | 2105 | 2162 | 8.46650792017   |
| NM_014497 | ZNF638 | 2353 | 2408 | 4.27503018475   |
| NM_014497 | ZNF638 | 4819 | 4865 | 5.85999268547   |
| NM_014497 | ZNF638 | 6084 | 6137 | 5.85999292139   |
| NM_014497 | ZNF638 | 3358 | 3435 | 5.85999292139   |
| NM_014497 | ZNF638 | 3157 | 3195 | 5.27101282049   |
| NM_014497 | ZNF638 | 5493 | 5553 | 4.27503042044   |
| NM_014497 | ZNF638 | 5570 | 5634 | 4.27502368961   |
| NM_014497 | ZNF638 | 1672 | 1748 | 5.85999268547   |
| NM_014497 | ZNF638 | 136  | 186  | 4.27101282049   |
| NM_014497 | ZNF638 | 498  | 583  | 4.27485667035   |
| NM_014497 | ZNF638 | 2756 | 2800 | 5.85998619033   |
| NM_014497 | ZNF638 | 5867 | 5937 | 4.27502368961   |
| NM_014497 | ZNF638 | 1579 | 1656 | 6.27503042067   |
| NM_014497 | ZNF638 | 2598 | 2636 | 4.27502368961   |
| NM_014497 | ZNF638 | 3761 | 3822 | 5.27101282049   |
| NM_014497 | ZNF638 | 769  | 844  | 5.85999291384   |
| NM_014497 | ZNF638 | 5310 | 5389 | 5.85999291384   |
| NM_014497 | ZNF638 | 981  | 1079 | 6.85999292139   |
| NM_014497 | ZNF638 | 1209 | 1397 | 5.85999292139   |
| NM_014497 | ZNF638 | 2886 | 2969 | 5.27101282049   |
| NM_014497 | ZNF638 | 2017 | 2143 | 5.27503042067   |
| NM_014497 | ZNF638 | 3460 | 3573 | 4.27503042067   |
| NM_014497 | ZNF638 | 37   | 131  | 6.27503042067   |
| NM_014497 | ZNF638 | 1405 | 1504 | 5.27503042066   |
| NM_052876 | NACC1  | 3237 | 3278 | 8.90060163277   |
| NM_052876 | NACC1  | 429  | 468  | 8.90461250189   |
| NM_052876 | NACC1  | 1211 | 1255 | 7.31563913205   |
| NM_052876 | NACC1  | 3126 | 3173 | 8.31965000117   |
| NM_052876 | NACC1  | 4231 | 4273 | 7.31965000117   |
| NM_052876 | NACC1  | 472  | 508  | 9.31948298191   |
| NM_052876 | NACC1  | 1798 | 1902 | 8.90461899703   |
| NM_052876 | NACC1  | 659  | 702  | 8.90444548263   |
| NM_052876 | NACC1  | 181  | 281  | 8.90461923294   |
| NM_052876 | NACC1  | 1433 | 1532 | 8.31965673222   |
| NM_052876 | NACC1  | 1011 | 1085 | 7.31965673222   |
| NM_052876 | NACC1  | 4387 | 4461 | 7.31965000117   |
| NM_005742 | PDIA6  | 1235 | 1276 | 1.33701055718   |
| NM_005742 | PDIA6  | 358  | 401  | -0.662996173876 |
| NM_005742 | PDIA6  | 84   | 328  | 4.86057251324   |
| NM_005742 | PDIA6  | 417  | 1232 | 6.40309974764   |
| NM_005742 | PDIA6  | 1276 | 1883 | 5.42447339843   |

|           |         |      |      |               |
|-----------|---------|------|------|---------------|
| NM_005741 | ZNF263  | 1539 | 1586 | 7.57563119947 |
| NM_005746 | NAMPT   | 942  | 985  | 5.31421841208 |
| NM_005746 | NAMPT   | 1603 | 1687 | 5.31421841208 |
| NM_005746 | NAMPT   | 1779 | 1823 | 5.31404466176 |
| NM_005746 | NAMPT   | 1463 | 1509 | 5.31421841208 |
| NM_005746 | NAMPT   | 653  | 701  | 5.3102008119  |
| NM_005746 | NAMPT   | 593  | 632  | 4.23007920269 |
| NM_005746 | NAMPT   | 1824 | 1977 | 6.63614650696 |
| NM_005746 | NAMPT   | 1345 | 1461 | 7.12157333413 |
| NM_005746 | NAMPT   | 2786 | 2835 | 6.3102008119  |
| NM_005746 | NAMPT   | 701  | 771  | 7.48414341352 |
| NM_005746 | NAMPT   | 989  | 1037 | 4.3102008119  |
| NM_005746 | NAMPT   | 1513 | 1566 | 4.31421817616 |
| NM_005746 | NAMPT   | 1060 | 1330 | 7.8991809128  |
| NM_005746 | NAMPT   | 821  | 935  | 6.63614650696 |
| NM_005746 | NAMPT   | 2014 | 2068 | 4.3102008119  |
| NM_005746 | NAMPT   | 2317 | 2394 | 6.31421841207 |
| NM_005746 | NAMPT   | 335  | 590  | 6.8991809128  |
| NM_005744 | ARIH1   | 1122 | 1204 | 4.76152619583 |
| NM_005744 | ARIH1   | 755  | 816  | 6.34665571581 |
| NM_005744 | ARIH1   | 349  | 440  | 4.76169994592 |
| NM_005744 | ARIH1   | 816  | 954  | 7.08362804103 |
| NM_032312 | YIPF4   | 132  | 173  | 7.9196249126  |
| NM_032312 | YIPF4   | 50   | 117  | 7.91578106275 |
| NM_032312 | YIPF4   | 404  | 535  | 9.3348361622  |
| NM_032312 | YIPF4   | 1695 | 1775 | 6.33081856203 |
| NM_032312 | YIPF4   | 1015 | 1102 | 9.3348361622  |
| NM_032312 | YIPF4   | 965  | 1004 | 7.91979193187 |
| NM_032312 | YIPF4   | 597  | 742  | 10.0352758803 |
| NM_032312 | YIPF4   | 1162 | 1236 | 8.65676425687 |
| NM_032312 | YIPF4   | 785  | 959  | 10.2417267578 |
| NM_032312 | YIPF4   | 287  | 375  | 7.91979866292 |
| NM_032313 | C4orf14 | 1773 | 1869 | 5.04126798884 |
| NM_032313 | C4orf14 | 1004 | 1083 | 6.03725038867 |
| NM_032313 | C4orf14 | 1973 | 2019 | 6.04126798884 |
| NM_032313 | C4orf14 | 774  | 831  | 5.04109423852 |
| NM_032313 | C4orf14 | 714  | 764  | 6.03725038867 |
| NM_032313 | C4orf14 | 222  | 295  | 6.62623048956 |
| NM_032313 | C4orf14 | 1732 | 1773 | 6.04126125779 |
| NM_032313 | C4orf14 | 1276 | 1347 | 5.04126798884 |
| NM_032313 | C4orf14 | 2142 | 2226 | 5.04126798884 |
| NM_032313 | C4orf14 | 1113 | 1191 | 5.04126798129 |
| NM_152624 | DCP2    | 458  | 508  | 8.19247120726 |
| NM_152624 | DCP2    | 4086 | 4136 | 9.18862735741 |
| NM_152624 | DCP2    | 6768 | 6811 | 9.10850574819 |
| NM_152624 | DCP2    | 3103 | 3170 | 9.19264495757 |
| NM_152624 | DCP2    | 3391 | 3443 | 9.77760722238 |
| NM_152624 | DCP2    | 2237 | 2315 | 9.77760745075 |
| NM_152624 | DCP2    | 621  | 778  | 10.5145730525 |
| NM_152330 | FRMD6   | 2474 | 2516 | 11.9906167414 |

|              |          |      |      |               |               |
|--------------|----------|------|------|---------------|---------------|
| NM_152330    | FRMD6    | 911  | 958  | 12.48979345   |               |
| NM_032319    | PRADC1   | 55   | 129  | 8.11597062306 |               |
| NM_001098728 | GTF2H2C  | 907  | 958  | 4.23138355619 |               |
| NM_001098728 | GTF2H2C  | 504  | 566  | 4.22753970634 |               |
| NM_001098728 | GTF2H2C  | 595  | 639  | 4.14741809713 |               |
| NM_001098728 | GTF2H2C  | 1289 | 1368 | 6.5534854014  |               |
| NM_001098728 | GTF2H2C  | 1035 | 1168 | 6.23155730651 |               |
| NM_001098728 | GTF2H2C  | 400  | 490  | 4.23155730629 |               |
| NM_001098722 | GNG4     | 1616 | 1664 | 5.67308640469 |               |
| NM_001098722 | GNG4     | 1786 | 1829 | 5.75705186375 |               |
| NM_018593    | SLC16A10 |      | 742  | 800           | 10.9954131605 |
| NM_018593    | SLC16A10 |      | 1172 | 1241          | 11.9954198915 |
| NM_018593    | SLC16A10 |      | 895  | 945           | 10.9954198915 |
| NM_018593    | SLC16A10 |      | 1430 | 1472          | 11.5802086419 |
| NM_018593    | SLC16A10 |      | 830  | 873           | 9.99140229136 |
| NM_018593    | SLC16A10 |      | 1035 | 1123          | 12.3173479864 |
| NM_018593    | SLC16A10 |      | 1631 | 1749          | 9.99541989131 |
| NM_022152    | TMBIM1   | 1467 | 1495 | 5.12062799225 |               |
| NM_022152    | TMBIM1   | 1516 | 1625 | 8.12080174257 |               |
| NM_022152    | TMBIM1   | 1918 | 1960 | 4.03666253319 |               |
| NM_022152    | TMBIM1   | 2159 | 2269 | 6.92815666463 |               |
| NM_022152    | TMBIM1   | 1643 | 1732 | 6.70576424329 |               |
| NM_022152    | TMBIM1   | 1985 | 2146 | 8.58023336121 |               |
| NM_022152    | TMBIM1   | 1808 | 1905 | 7.12080174257 |               |
| NM_022152    | TMBIM1   | 343  | 1450 | 11.3592064819 |               |
| NM_022152    | TMBIM1   | 119  | 191  | 4.12080174257 |               |
| NM_022156    | DUS1L    | 1336 | 1396 | 6.53986996571 |               |
| NM_022156    | DUS1L    | 1464 | 1568 | 6.53986996593 |               |
| NM_022156    | DUS1L    | 391  | 558  | 7.53986996593 |               |
| NM_022156    | DUS1L    | 753  | 912  | 6.95490746521 |               |
| NM_022158    | FN3K     | 695  | 768  | 5.72651050679 |               |
| NM_018390    | PLCXD1   | 759  | 841  | 4.86069926477 |               |
| NM_018390    | PLCXD1   | 2845 | 2912 | 3.19159755467 |               |
| NM_018390    | PLCXD1   | 1065 | 1101 | 3.19159755467 |               |
| NM_018390    | PLCXD1   | 1251 | 1296 | 4.86052551445 |               |
| NM_018390    | PLCXD1   | 3255 | 3308 | 4.8566816646  |               |
| NM_018390    | PLCXD1   | 228  | 293  | 4.27573676405 |               |
| NM_018390    | PLCXD1   | 595  | 681  | 4.27573676405 |               |
| NM_018390    | PLCXD1   | 1323 | 1397 | 4.27573676405 |               |
| NM_018390    | PLCXD1   | 3453 | 3495 | 4.27171916388 |               |
| NM_018390    | PLCXD1   | 5189 | 5231 | 4.86069253372 |               |
| NM_018390    | PLCXD1   | 4124 | 4178 | 3.27171916388 |               |
| NM_018390    | PLCXD1   | 913  | 959  | 4.19159755467 |               |
| NM_018390    | PLCXD1   | 437  | 530  | 4.27573676383 |               |
| NM_018390    | PLCXD1   | 3768 | 3813 | 4.27573676405 |               |
| NM_018390    | PLCXD1   | 4527 | 4618 | 3.27573676405 |               |
| NM_018390    | PLCXD1   | 3396 | 3444 | 3.19159755467 |               |
| NM_018390    | PLCXD1   | 4259 | 4401 | 5.86069926477 |               |
| NM_001048223 | DBNDD2   | 806  | 879  | 7.54670963433 |               |
| NM_001048223 | DBNDD2   | 293  | 409  | 7.86863772922 |               |

|              |        |      |      |               |
|--------------|--------|------|------|---------------|
| NM_001048223 | DBNDD2 | 249  | 288  | 6.54269203416 |
| NM_001048223 | DBNDD2 | 470  | 534  | 7.13167213506 |
| NM_001048223 | DBNDD2 | 700  | 805  | 6.54670963433 |
| NM_001048223 | DBNDD2 | 886  | 1026 | 8.35406455639 |
| NM_018397    | CHDH   | 1794 | 1839 | 6.55277386636 |
| NM_018397    | CHDH   | 409  | 447  | 6.46863466453 |
| NM_018394    | ABHD10 | 181  | 253  | 6.87598538854 |
| NM_018394    | ABHD10 | 285  | 383  | 7.88000298871 |
| NM_133367    | PAQR8  | 765  | 819  | 9.79833255911 |
| NM_133367    | PAQR8  | 1126 | 1178 | 9.79833232319 |
| NM_133367    | PAQR8  | 2445 | 2543 | 10.6056874812 |
| NM_133367    | PAQR8  | 2375 | 2425 | 9.37927745966 |
| NM_133367    | PAQR8  | 1217 | 1315 | 10.6056874812 |
| NM_133367    | PAQR8  | 846  | 898  | 8.79833255156 |
| NM_133367    | PAQR8  | 1810 | 1881 | 10.3832950598 |
| NM_133367    | PAQR8  | 1336 | 1405 | 7.79431495893 |
| NM_133367    | PAQR8  | 2066 | 2118 | 8.71419334972 |
| NM_133367    | PAQR8  | 706  | 764  | 9.38329505982 |
| NM_133367    | PAQR8  | 983  | 1081 | 10.7983325591 |
| NM_133367    | PAQR8  | 2718 | 2828 | 7.79833255911 |
| NM_133367    | PAQR8  | 477  | 705  | 11.7983325591 |
| NM_133367    | PAQR8  | 394  | 474  | 9.38329505961 |
| NM_133367    | PAQR8  | 1532 | 1627 | 8.79833255889 |
| NM_030920    | ANP32E | 2304 | 2363 | 4.20834368931 |
| NM_030920    | ANP32E | 2472 | 2537 | 5.20834346095 |
| NM_030920    | ANP32E | 2185 | 2226 | 4.20432609669 |
| NM_030920    | ANP32E | 1127 | 1168 | 5.20834346095 |
| NM_030920    | ANP32E | 469  | 540  | 6.53027179175 |
| NM_030920    | ANP32E | 2902 | 2964 | 4.20833696581 |
| NM_030920    | ANP32E | 1657 | 1720 | 5.79330619736 |
| NM_030920    | ANP32E | 1329 | 1408 | 6.79330619759 |
| NM_030920    | ANP32E | 1902 | 1986 | 5.79330619759 |
| NM_030920    | ANP32E | 2576 | 2656 | 5.12420448748 |
| NM_030920    | ANP32E | 1722 | 1830 | 6.20834369686 |
| NM_030920    | ANP32E | 3017 | 3133 | 6.20834369686 |
| NM_030920    | ANP32E | 3138 | 3297 | 5.79330619759 |
| NM_030920    | ANP32E | 661  | 856  | 7.6677753155  |
| NM_016134    | PGCP   | 890  | 957  | 4.17775277237 |
| NM_016134    | PGCP   | 1411 | 1475 | 5.17390892251 |
| NM_016134    | PGCP   | 1496 | 1606 | 6.17791979163 |
| NM_016134    | PGCP   | 1167 | 1330 | 6.98528144474 |
| NM_016134    | PGCP   | 246  | 321  | 4.17775277237 |
| NM_016134    | PGCP   | 1010 | 1111 | 5.7628890234  |
| NM_013943    | CLIC4  | 2183 | 2254 | 4.71524599911 |
| NM_013943    | CLIC4  | 3275 | 3320 | 3.71507897985 |
| NM_013943    | CLIC4  | 3828 | 3895 | 3.71525272262 |
| NM_013943    | CLIC4  | 590  | 672  | 5.71525273017 |
| NM_013943    | CLIC4  | 1676 | 1737 | 5.71525249425 |
| NM_013943    | CLIC4  | 326  | 386  | 4.71525249425 |
| NM_013943    | CLIC4  | 425  | 580  | 6.71525273017 |

|           |        |      |      |               |
|-----------|--------|------|------|---------------|
| NM_013943 | CLIC4  | 872  | 975  | 6.03718082505 |
| NM_013943 | CLIC4  | 1102 | 1200 | 5.30021523089 |
| NM_013943 | CLIC4  | 693  | 870  | 6.71525273017 |
| NM_013943 | CLIC4  | 1495 | 1569 | 4.71525272262 |
| NM_016131 | RAB10  | 1380 | 1459 | 4.61723091058 |
| NM_016131 | RAB10  | 1323 | 1361 | 3.21116360631 |
| NM_016131 | RAB10  | 262  | 353  | 5.29530281569 |
| NM_016131 | RAB10  | 575  | 629  | 3.29128521552 |
| NM_016131 | RAB10  | 2338 | 2387 | 3.8800915661  |
| NM_016131 | RAB10  | 369  | 424  | 2.29128521552 |
| NM_016131 | RAB10  | 1480 | 1531 | 4.88026531642 |
| NM_016131 | RAB10  | 737  | 814  | 4.29530281569 |
| NM_016131 | RAB10  | 642  | 714  | 3.29530281569 |
| NM_016131 | RAB10  | 1179 | 1304 | 2.29530281569 |
| NM_016131 | RAB10  | 1081 | 1164 | 4.29530281569 |
| NM_016131 | RAB10  | 3390 | 3479 | 4.61723091058 |
| NM_016131 | RAB10  | 3584 | 3653 | 2.29530281569 |
| NM_016131 | RAB10  | 821  | 901  | 3.88026531642 |
| NM_016131 | RAB10  | 1950 | 2026 | 4.61723091058 |
| NM_016132 | MYEF2  | 3405 | 3479 | 5.56283859854 |
| NM_016133 | INSIG2 | 2273 | 2314 | 2.26358235972 |
| NM_016133 | INSIG2 | 789  | 856  | 3.26759322884 |
| NM_016133 | INSIG2 | 269  | 322  | 4.85256246062 |
| NM_016133 | INSIG2 | 73   | 118  | 3.8525624604  |
| NM_016133 | INSIG2 | 509  | 605  | 4.85256246062 |
| NM_016133 | INSIG2 | 1100 | 1146 | 3.18346075051 |
| NM_016133 | INSIG2 | 1428 | 1485 | 2.26742620958 |
| NM_016133 | INSIG2 | 341  | 385  | 4.58935430447 |
| NM_016133 | INSIG2 | 606  | 721  | 5.85256246062 |
| NM_016133 | INSIG2 | 922  | 1022 | 4.85256246062 |
| NM_016133 | INSIG2 | 2100 | 2204 | 4.26759995989 |
| NM_016139 | CHCHD2 | 48   | 104  | 3.89690186177 |
| NM_016139 | CHCHD2 | 668  | 781  | 7.98436470302 |
| NM_016139 | CHCHD2 | 118  | 156  | 3.8928842616  |
| NM_016139 | CHCHD2 | 415  | 630  | 8.59734157991 |
| NM_016139 | CHCHD2 | 187  | 414  | 8.42046381783 |
| NM_015721 | GEMIN4 | 2404 | 2456 | 8.27836861336 |
| NM_015721 | GEMIN4 | 2639 | 2690 | 8.28237948248 |
| NM_015721 | GEMIN4 | 440  | 496  | 7.28221246322 |
| NM_015721 | GEMIN4 | 1386 | 1442 | 7.27836861336 |
| NM_015721 | GEMIN4 | 1922 | 1972 | 9.28238620599 |
| NM_015721 | GEMIN4 | 549  | 581  | 8.27836861336 |
| NM_015721 | GEMIN4 | 198  | 250  | 7.28237948248 |
| NM_015721 | GEMIN4 | 1141 | 1224 | 7.28238621354 |
| NM_015721 | GEMIN4 | 3084 | 3147 | 7.28237948248 |
| NM_015721 | GEMIN4 | 2062 | 2132 | 7.28238597762 |
| NM_015721 | GEMIN4 | 1470 | 1555 | 9.27836861336 |
| NM_015723 | PNPLA8 | 1725 | 1806 | 7.77425686528 |
| NM_015723 | PNPLA8 | 2503 | 2568 | 6.10515515518 |
| NM_015723 | PNPLA8 | 3125 | 3176 | 7.18527676439 |

|              |       |      |      |               |
|--------------|-------|------|------|---------------|
| NM_001040158 | H2AFY | 167  | 205  | 5.13647589804 |
| NM_001040158 | H2AFY | 1709 | 1778 | 6.80557760815 |
| NM_001040158 | H2AFY | 1670 | 1708 | 5.80557760814 |
| NM_001040158 | H2AFY | 729  | 770  | 4.13647589804 |
| NM_001040158 | H2AFY | 1280 | 1372 | 6.80557760815 |
| NM_001040158 | H2AFY | 1428 | 1627 | 7.80557760815 |
| NM_001040158 | H2AFY | 359  | 492  | 6.54254320231 |
| NM_001040158 | H2AFY | 858  | 1130 | 8.80557760815 |
| NM_001040158 | H2AFY | 1142 | 1270 | 7.39054010887 |
| NM_015726    | DCAF8 | 1548 | 1601 | 6.69930180441 |
| NM_015726    | DCAF8 | 1948 | 1987 | 5.69930180441 |
| NM_015726    | DCAF8 | 3231 | 3285 | 4.69930829954 |
| NM_015726    | DCAF8 | 1206 | 1246 | 5.61516932608 |
| NM_015726    | DCAF8 | 2997 | 3047 | 4.69529093529 |
| NM_015726    | DCAF8 | 1831 | 1882 | 6.28025343601 |
| NM_015726    | DCAF8 | 2552 | 2663 | 5.69930853546 |
| NM_015726    | DCAF8 | 1248 | 1365 | 6.28427080027 |
| NM_015726    | DCAF8 | 3432 | 3552 | 5.69930853524 |
| NM_015726    | DCAF8 | 2063 | 2160 | 6.28427103618 |
| NM_003935    | TOP3B | 3079 | 3142 | 6.52731583444 |
| NM_003935    | TOP3B | 453  | 568  | 8.11629593533 |
| NM_001177643 | DAG1  | 2669 | 2742 | 9.5498682289  |
| NM_001177643 | DAG1  | 4218 | 4278 | 9.13483072207 |
| NM_001177643 | DAG1  | 3741 | 3789 | 8.54986799298 |
| NM_001177643 | DAG1  | 669  | 715  | 7.54969447858 |
| NM_001177643 | DAG1  | 355  | 423  | 7.5498682289  |
| NM_001177643 | DAG1  | 5378 | 5438 | 9.13483072961 |
| NM_001177643 | DAG1  | 1084 | 1201 | 10.357223151  |
| NM_001177643 | DAG1  | 5062 | 5110 | 9.54986822135 |
| NM_001177643 | DAG1  | 4485 | 4555 | 9.54986822868 |
| NM_001177643 | DAG1  | 4582 | 4623 | 8.54986822135 |
| NM_001177643 | DAG1  | 2961 | 3016 | 7.54986822868 |
| NM_001177643 | DAG1  | 1777 | 1857 | 8.54986822868 |
| NM_001177643 | DAG1  | 748  | 784  | 8.54969447858 |
| NM_001177643 | DAG1  | 4624 | 4767 | 10.7197932303 |
| NM_001177643 | DAG1  | 5137 | 5191 | 8.5498682289  |
| NM_001177643 | DAG1  | 3995 | 4038 | 7.46572901951 |
| NM_001177643 | DAG1  | 1674 | 1726 | 8.54986149785 |
| NM_001177643 | DAG1  | 2300 | 2413 | 9.5498682289  |
| NM_001177643 | DAG1  | 437  | 609  | 11.1348307296 |
| NM_001177643 | DAG1  | 1237 | 1354 | 9.5498682289  |
| NM_001177643 | DAG1  | 4859 | 4919 | 7.54986149785 |
| NM_001177643 | DAG1  | 3168 | 3328 | 10.357223151  |
| NM_001177643 | DAG1  | 1927 | 2088 | 10.1348307296 |
| NM_001177643 | DAG1  | 1557 | 1652 | 8.5498682289  |
| NM_001177643 | DAG1  | 3333 | 3461 | 11.1348307296 |
| NM_001177643 | DAG1  | 2821 | 2929 | 10.1348307296 |
| NM_001177643 | DAG1  | 2427 | 2619 | 11.250307947  |
| NM_001177643 | DAG1  | 898  | 1071 | 10.5498682289 |
| NM_001177643 | DAG1  | 3469 | 3695 | 11.5498682289 |

|              |              |      |      |               |               |
|--------------|--------------|------|------|---------------|---------------|
| NM_138363    | CEP95        | 119  | 157  | 3.60240522687 |               |
| NM_138363    | CEP95        | 1941 | 2023 | 3.60624907673 |               |
| NM_019088    | PAF1         | 1682 | 1746 | 6.14002999469 |               |
| NM_019088    | PAF1         | 147  | 187  | 5.55506748642 |               |
| NM_019088    | PAF1         | 1901 | 1961 | 6.14002999468 |               |
| NM_019088    | PAF1         | 226  | 284  | 4.55506749397 |               |
| NM_019088    | PAF1         | 953  | 1024 | 4.55506749397 |               |
| NM_019088    | PAF1         | 403  | 465  | 6.14002998714 |               |
| NM_019088    | PAF1         | 1159 | 1238 | 5.55506749397 |               |
| NM_019088    | PAF1         | 1082 | 1156 | 6.14002999469 |               |
| NM_019088    | PAF1         | 513  | 647  | 5.55506749397 |               |
| NM_138368    | DKFZp761E198 |      | 791  | 855           | 12.8757566823 |
| NM_138368    | DKFZp761E198 |      | 2795 | 2893          | 11.8797742825 |
| NM_138368    | DKFZp761E198 |      | 2275 | 2314          | 12.8796005322 |
| NM_138368    | DKFZp761E198 |      | 1391 | 1489          | 13.4647367832 |
| NM_138368    | DKFZp761E198 |      | 630  | 702           | 11.7956350731 |
| NM_138368    | DKFZp761E198 |      | 3272 | 3362          | 11.8797675515 |
| NM_138369    | BOD1         | 1074 | 1133 | 2.22055370085 |               |
| NM_138369    | BOD1         | 414  | 461  | 2.13658824179 |               |
| NM_138369    | BOD1         | 816  | 899  | 3.216709851   |               |
| NM_001240    | CCNT1        | 5104 | 5160 | 7.48452351905 |               |
| NM_001240    | CCNT1        | 2185 | 2251 | 7.56464512827 |               |
| NM_001240    | CCNT1        | 1311 | 1389 | 8.56866272844 |               |
| NM_001240    | CCNT1        | 1063 | 1209 | 7.56866272844 |               |
| NM_001240    | CCNT1        | 699  | 779  | 7.56866272089 |               |
| NM_001247    | ENTPD6       | 1648 | 1710 | 4.53209846907 |               |
| NM_001247    | ENTPD6       | 1383 | 1448 | 4.53227221939 |               |
| NM_001247    | ENTPD6       | 1453 | 1533 | 5.53226548834 |               |
| NM_001247    | ENTPD6       | 913  | 947  | 4.44813301001 |               |
| NM_001247    | ENTPD6       | 2545 | 2579 | 4.44813301001 |               |
| NM_001247    | ENTPD6       | 812  | 901  | 6.53227221939 |               |
| NM_001247    | ENTPD6       | 300  | 349  | 5.53227221184 |               |
| NM_001247    | ENTPD6       | 573  | 710  | 7.33962714145 |               |
| NM_001247    | ENTPD6       | 2314 | 2495 | 8.53227221939 |               |
| NM_001247    | ENTPD6       | 1009 | 1094 | 6.53227221939 |               |
| NM_001247    | ENTPD6       | 1813 | 1926 | 6.11723471989 |               |
| NM_148977    | PANK1        | 2345 | 2412 | 4.91664657579 |               |
| NM_148977    | PANK1        | 1956 | 2060 | 6.50178282682 |               |
| NM_001207014 | SERPINH1     |      | 192  | 233           | 5.80624277622 |
| NM_001207014 | SERPINH1     |      | 540  | 591           | 5.72612116701 |
| NM_001207014 | SERPINH1     |      | 966  | 1134          | 8.26969199503 |
| NM_001207014 | SERPINH1     |      | 798  | 863           | 6.81026037639 |
| NM_001207014 | SERPINH1     |      | 2081 | 2191          | 6.81026037639 |
| NM_001207014 | SERPINH1     |      | 1155 | 1255          | 7.39522287712 |
| NM_001207014 | SERPINH1     |      | 713  | 782           | 7.13218847128 |
| NM_001207014 | SERPINH1     |      | 1804 | 1893          | 6.81026037639 |
| NM_001207014 | SERPINH1     |      | 1567 | 1611          | 5.81008662608 |
| NM_001207014 | SERPINH1     |      | 1727 | 1798          | 5.81025364534 |
| NM_001207014 | SERPINH1     |      | 1270 | 1501          | 8.51070009454 |
| NM_001207012 | PGF          | 511  | 550  | 7.82703455358 |               |



|           |        |      |      |               |
|-----------|--------|------|------|---------------|
| NM_000755 | CRAT   | 1235 | 1304 | 6.93601215588 |
| NM_000755 | CRAT   | 534  | 584  | 5.35506725511 |
| NM_000046 | ARSB   | 1782 | 1933 | 6.31351393377 |
| NM_000046 | ARSB   | 2295 | 2365 | 4.72855119713 |
| NM_000046 | ARSB   | 2905 | 2963 | 6.22937472439 |
| NM_000046 | ARSB   | 2134 | 2173 | 4.64441222367 |
| NM_000046 | ARSB   | 1631 | 1695 | 4.728544702   |
| NM_000046 | ARSB   | 1696 | 1756 | 5.72453383288 |
| NM_000046 | ARSB   | 2650 | 2712 | 4.72855119713 |
| NM_000046 | ARSB   | 1975 | 2053 | 5.7285514255  |
| NM_000042 | APOH   | 1008 | 1117 | 2.9432527564  |
| NM_000042 | APOH   | 586  | 669  | 3.9432527564  |
| NM_000042 | APOH   | 956  | 1003 | 1.9432527564  |
| NM_000042 | APOH   | 307  | 514  | 5.80123375153 |
| NM_000042 | APOH   | 531  | 584  | 1.94325274885 |
| NM_000042 | APOH   | 845  | 940  | 2.52821525712 |
| NM_000042 | APOH   | 167  | 241  | 2.52821525712 |
| NM_000042 | APOH   | 679  | 834  | 5.19118026985 |
| NM_000042 | APOH   | 245  | 302  | 3.52821525712 |
| NM_000042 | APOH   | 40   | 154  | 4.75060767846 |
| NM_000593 | TAP1   | 946  | 1047 | 10.1277352471 |
| NM_000593 | TAP1   | 1559 | 1689 | 8.80580715224 |
| NM_000593 | TAP1   | 1500 | 1549 | 7.80563340192 |
| NM_000593 | TAP1   | 1965 | 2016 | 7.80563340192 |
| NM_000593 | TAP1   | 1182 | 1287 | 10.1277352471 |
| NM_000593 | TAP1   | 386  | 463  | 9.80580715224 |
| NM_000593 | TAP1   | 2205 | 2252 | 9.30663044357 |
| NM_000593 | TAP1   | 2582 | 2636 | 9.39076941704 |
| NM_000040 | APOC3  | 429  | 461  | 2.90507423834 |
| NM_000598 | IGFBP3 | 1493 | 1560 | 3.40211818469 |
| NM_000598 | IGFBP3 | 1816 | 1869 | 5.72789012943 |
| NM_000598 | IGFBP3 | 535  | 592  | 5.40613577731 |
| NM_000598 | IGFBP3 | 2031 | 2084 | 5.32199657548 |
| NM_000598 | IGFBP3 | 2322 | 2371 | 4.40596203454 |
| NM_000598 | IGFBP3 | 1097 | 1156 | 5.40613578485 |
| NM_000598 | IGFBP3 | 1562 | 1612 | 5.40613578485 |
| NM_000598 | IGFBP3 | 1614 | 1670 | 3.40613554894 |
| NM_000598 | IGFBP3 | 302  | 352  | 3.40596203454 |
| NM_000598 | IGFBP3 | 900  | 942  | 4.40612905381 |
| NM_000598 | IGFBP3 | 2203 | 2270 | 4.40596203454 |
| NM_000598 | IGFBP3 | 963  | 1097 | 5.72806387975 |
| NM_000598 | IGFBP3 | 5    | 116  | 6.21349070692 |
| NM_000598 | IGFBP3 | 1156 | 1484 | 7.40613578486 |
| NM_000598 | IGFBP3 | 648  | 785  | 5.99109828558 |
| NM_000598 | IGFBP3 | 1886 | 1947 | 3.32199657548 |
| NM_000598 | IGFBP3 | 785  | 843  | 4.40596203454 |
| NM_000598 | IGFBP3 | 151  | 259  | 4.40613578486 |
| NM_021173 | POLD4  | 854  | 885  | 8.84701238202 |
| NM_021173 | POLD4  | 387  | 433  | 8.85102974628 |
| NM_021173 | POLD4  | 786  | 853  | 10.8510232511 |

|           |          |       |       |               |               |
|-----------|----------|-------|-------|---------------|---------------|
| NM_021173 | POLD4    | 889   | 942   | 8.84701238202 |               |
| NM_021170 | HES4     | 445   | 474   | 8.57092182709 |               |
| NM_021170 | HES4     | 874   | 944   | 8.57092206301 |               |
| NM_021177 | LSM2     | 241   | 373   | 6.33950963634 |               |
| NM_021174 | KIAA1967 |       | 394   | 437           | 5.20587600967 |
| NM_021174 | KIAA1967 |       | 1596  | 1652          | 6.79083874631 |
| NM_021174 | KIAA1967 |       | 1113  | 1186          | 7.79083874631 |
| NM_021174 | KIAA1967 |       | 626   | 678           | 7.52780434048 |
| NM_021174 | KIAA1967 |       | 3347  | 3407          | 5.20587623804 |
| NM_021174 | KIAA1967 |       | 3484  | 3526          | 6.7908385104  |
| NM_021174 | KIAA1967 |       | 3714  | 3797          | 5.20587600967 |
| NM_021174 | KIAA1967 |       | 3530  | 3629          | 6.20587624559 |
| NM_021174 | KIAA1967 |       | 1701  | 1772          | 6.78682114614 |
| NM_021174 | KIAA1967 |       | 1342  | 1439          | 7.79083874631 |
| NM_021174 | KIAA1967 |       | 3814  | 3877          | 5.20587623804 |
| NM_021174 | KIAA1967 |       | 2755  | 2786          | 5.20185864542 |
| NM_021174 | KIAA1967 |       | 2017  | 2154          | 6.79083874631 |
| NM_021174 | KIAA1967 |       | 1917  | 2009          | 6.20587624559 |
| NM_021174 | KIAA1967 |       | 2306  | 2449          | 6.79083874631 |
| NM_021174 | KIAA1967 |       | 845   | 1040          | 8.52780434048 |
| NM_021174 | KIAA1967 |       | 1849  | 1914          | 6.20587623804 |
| NM_021174 | KIAA1967 |       | 2465  | 2637          | 8.79083874631 |
| NM_021174 | KIAA1967 |       | 455   | 583           | 5.20587624559 |
| NM_021174 | KIAA1967 |       | 1187  | 1340          | 8.37580124704 |
| NM_152523 | CCNYL1   | 2410  | 2457  | 6.57841227617 |               |
| NM_152523 | CCNYL1   | 2678  | 2698  | 6.574394676   |               |
| NM_199166 | ALAS1    | 467   | 519   | 7.45996949088 |               |
| NM_199166 | ALAS1    | 1567  | 1710  | 9.12907120099 |               |
| NM_199166 | ALAS1    | 1280  | 1360  | 6.95914619932 |               |
| NM_199166 | ALAS1    | 667   | 718   | 5.959146192   |               |
| NM_199166 | ALAS1    | 999   | 1235  | 9.7665011216  |               |
| NM_199166 | ALAS1    | 852   | 940   | 6.95914619955 |               |
| NM_199127 | GGTLC2   | 530   | 572   | 5.74677740059 |               |
| NM_199129 | TMEM189  | 1188  | 1229  | 6.66773221213 |               |
| NM_199129 | TMEM189  | 820   | 922   | 7.66790596245 |               |
| NM_199129 | TMEM189  | 274   | 356   | 6.66388836227 |               |
| NM_012094 | PRDX5    | 831   | 882   | 3.68987826962 |               |
| NM_012094 | PRDX5    | 561   | 657   | 6.69005201994 |               |
| NM_012094 | PRDX5    | 346   | 426   | 6.01198011483 |               |
| NM_012094 | PRDX5    | 432   | 543   | 6.69005201994 |               |
| NM_012094 | PRDX5    | 165   | 257   | 4.69005201993 |               |
| NM_012094 | PRDX5    | 683   | 830   | 4.69005201994 |               |
| NM_012090 | MACF1    | 6695  | 6804  | 7.4446600713  |               |
| NM_012090 | MACF1    | 1053  | 1109  | 5.12272524536 |               |
| NM_012090 | MACF1    | 11531 | 11581 | 6.12273197641 |               |
| NM_012090 | MACF1    | 11931 | 11961 | 5.03859276703 |               |
| NM_012090 | MACF1    | 3043  | 3107  | 7.4446600713  |               |
| NM_012090 | MACF1    | 10671 | 10716 | 5.03859276703 |               |
| NM_012090 | MACF1    | 9536  | 9602  | 7.03859276703 |               |
| NM_012090 | MACF1    | 13015 | 13077 | 7.12273174049 |               |

|           |       |       |       |               |
|-----------|-------|-------|-------|---------------|
| NM_012090 | MACF1 | 14788 | 14863 | 7.70769447713 |
| NM_012090 | MACF1 | 15743 | 15808 | 6.12273174049 |
| NM_012090 | MACF1 | 13860 | 13920 | 7.12273197641 |
| NM_012090 | MACF1 | 16312 | 16394 | 5.12273197641 |
| NM_012090 | MACF1 | 11012 | 11088 | 6.12273174049 |
| NM_012090 | MACF1 | 356   | 413   | 6.12273197641 |
| NM_012090 | MACF1 | 443   | 516   | 6.11871437624 |
| NM_012090 | MACF1 | 8931  | 9023  | 6.70769447713 |
| NM_012090 | MACF1 | 8734  | 8784  | 5.12273197641 |
| NM_012090 | MACF1 | 12044 | 12090 | 5.12272524536 |
| NM_012090 | MACF1 | 15555 | 15605 | 5.12273174049 |
| NM_012090 | MACF1 | 3143  | 3195  | 6.12273197641 |
| NM_012090 | MACF1 | 1356  | 1424  | 6.12272524536 |
| NM_012090 | MACF1 | 16396 | 16474 | 6.70769446958 |
| NM_012090 | MACF1 | 6867  | 6973  | 6.12272524536 |
| NM_012090 | MACF1 | 15969 | 16033 | 5.11871437624 |
| NM_012090 | MACF1 | 4195  | 4258  | 6.70769447713 |
| NM_012090 | MACF1 | 12263 | 12436 | 7.12273197641 |
| NM_012090 | MACF1 | 2704  | 2775  | 6.12273196886 |
| NM_012090 | MACF1 | 8259  | 8321  | 5.03859276703 |
| NM_012090 | MACF1 | 11137 | 11215 | 6.12273197641 |
| NM_012090 | MACF1 | 13716 | 13774 | 5.12273174049 |
| NM_012090 | MACF1 | 12714 | 12803 | 6.70769447713 |
| NM_012090 | MACF1 | 12121 | 12164 | 5.12273174049 |
| NM_012090 | MACF1 | 11233 | 11301 | 6.70769447713 |
| NM_012090 | MACF1 | 10268 | 10310 | 7.12272524536 |
| NM_012090 | MACF1 | 11411 | 11455 | 6.12272524536 |
| NM_012090 | MACF1 | 16487 | 16554 | 5.12273174049 |
| NM_012090 | MACF1 | 2920  | 2961  | 6.12272524536 |
| NM_012090 | MACF1 | 13535 | 13566 | 6.12255822609 |
| NM_012090 | MACF1 | 9051  | 9158  | 6.70769447691 |
| NM_012090 | MACF1 | 1300  | 1345  | 6.11871437624 |
| NM_012090 | MACF1 | 17188 | 17259 | 6.12273197619 |
| NM_012090 | MACF1 | 9696  | 9820  | 7.12273197641 |
| NM_012090 | MACF1 | 8417  | 8515  | 7.70769447713 |
| NM_012090 | MACF1 | 16945 | 17015 | 7.12273197619 |
| NM_012090 | MACF1 | 15166 | 15352 | 8.12273197641 |
| NM_012090 | MACF1 | 13253 | 13338 | 7.12273197641 |
| NM_012090 | MACF1 | 10118 | 10201 | 6.12273196886 |
| NM_012090 | MACF1 | 10774 | 10869 | 6.12273197641 |
| NM_012090 | MACF1 | 3507  | 3666  | 6.12273197641 |
| NM_012090 | MACF1 | 5657  | 5745  | 6.11871437624 |
| NM_012090 | MACF1 | 15356 | 15460 | 7.12273197641 |
| NM_012090 | MACF1 | 14365 | 14461 | 6.70769447713 |
| NM_012090 | MACF1 | 14106 | 14230 | 7.12273197641 |
| NM_012090 | MACF1 | 10490 | 10561 | 6.12255822609 |
| NM_012090 | MACF1 | 1738  | 1860  | 7.93008689847 |
| NM_012090 | MACF1 | 2062  | 2191  | 6.70769447713 |
| NM_012090 | MACF1 | 8042  | 8170  | 7.70769447713 |
| NM_012090 | MACF1 | 12450 | 12615 | 6.70769447713 |

|              |         |       |       |               |
|--------------|---------|-------|-------|---------------|
| NM_012090    | MACF1   | 5204  | 5287  | 5.12255822609 |
| NM_012090    | MACF1   | 739   | 859   | 6.12273197641 |
| NM_012090    | MACF1   | 13958 | 14052 | 7.12273197641 |
| NM_012090    | MACF1   | 12872 | 12938 | 5.12272524536 |
| NM_019086    | VSIG10  | 868   | 943   | 8.65563577566 |
| NM_019086    | VSIG10  | 512   | 556   | 8.65562904461 |
| NM_017667    | CCDC132 | 2174  | 2217  | 5.85059989708 |
| NM_017667    | CCDC132 | 1987  | 2016  | 7.43957326692 |
| NM_017667    | CCDC132 | 2367  | 2408  | 7.43957326692 |
| NM_017667    | CCDC132 | 3171  | 3238  | 7.85461748971 |
| NM_017667    | CCDC132 | 60    | 118   | 7.85461726134 |
| NM_017667    | CCDC132 | 2053  | 2164  | 8.43957999798 |
| NM_017667    | CCDC132 | 2414  | 2491  | 5.85059989708 |
| NM_017667    | CCDC132 | 1256  | 1311  | 6.77047828787 |
| NM_017667    | CCDC132 | 3490  | 3527  | 7.4355623978  |
| NM_017667    | CCDC132 | 1132  | 1182  | 6.8546107662  |
| NM_017667    | CCDC132 | 1211  | 1250  | 5.85461726134 |
| NM_017667    | CCDC132 | 1784  | 1847  | 5.77047828787 |
| NM_017667    | CCDC132 | 1048  | 1109  | 5.85059989708 |
| NM_017667    | CCDC132 | 301   | 377   | 7.43957999797 |
| NM_017665    | ZCCHC10 | 778   | 837   | 6.0304953376  |
| NM_017665    | ZCCHC10 | 461   | 554   | 7.0304953376  |
| NM_001035534 | FAM129B | 490   | 570   | 7.45635270852 |
| NM_001035534 | FAM129B | 1601  | 1702  | 6.4563527083  |
| NM_001035534 | FAM129B | 2445  | 2562  | 6.45635270853 |
| NM_001035534 | FAM129B | 617   | 678   | 4.78725099842 |
| NM_001035534 | FAM129B | 1955  | 2030  | 5.87138347675 |
| NM_017660    | GATAD2A | 3552  | 3587  | 6.13188428856 |
| NM_017660    | GATAD2A | 1182  | 1234  | 5.13205803133 |
| NM_017660    | GATAD2A | 2374  | 2475  | 8.30198304032 |
| NM_017660    | GATAD2A | 5343  | 5411  | 6.13205803888 |
| NM_017660    | GATAD2A | 3708  | 3776  | 5.13205803133 |
| NM_017660    | GATAD2A | 2748  | 2795  | 6.13205803133 |
| NM_017660    | GATAD2A | 2497  | 2542  | 5.13205803887 |
| NM_017660    | GATAD2A | 687   | 809   | 6.71702053205 |
| NM_017660    | GATAD2A | 4021  | 4114  | 6.13205803133 |
| NM_017660    | GATAD2A | 424   | 502   | 5.13205780296 |
| NM_017660    | GATAD2A | 1454  | 1496  | 7.13188428856 |
| NM_017660    | GATAD2A | 5604  | 5659  | 6.71702053959 |
| NM_017660    | GATAD2A | 3395  | 3483  | 7.13205803887 |
| NM_017660    | GATAD2A | 601   | 650   | 5.12804043871 |
| NM_017660    | GATAD2A | 3630  | 3669  | 7.71684678928 |
| NM_017660    | GATAD2A | 526   | 594   | 6.71701380855 |
| NM_017660    | GATAD2A | 2557  | 2708  | 7.7170205396  |
| NM_017660    | GATAD2A | 1099  | 1179  | 6.13205803888 |
| NM_017660    | GATAD2A | 3041  | 3077  | 6.13188428856 |
| NM_017660    | GATAD2A | 1995  | 2072  | 7.13205803888 |
| NM_017660    | GATAD2A | 3275  | 3377  | 7.7170205396  |
| NM_017660    | GATAD2A | 3155  | 3213  | 5.0479188295  |
| NM_017660    | GATAD2A | 889   | 962   | 5.13205803888 |

|              |          |      |      |                    |
|--------------|----------|------|------|--------------------|
| NM_017660    | GATAD2A  | 2929 | 3018 | 5.13205803888      |
| NM_017660    | GATAD2A  | 1381 | 1450 | 6.13205130783      |
| NM_017668    | NDE1     | 587  | 668  | 3.39239804466      |
| NM_001083625 | ANKRD12  | 8915 | 8977 | 5.38718692894      |
| NM_001083625 | ANKRD12  | 4332 | 4387 | 5.38718692894      |
| NM_001083625 | ANKRD12  | 1926 | 1976 | 6.38334307908      |
| NM_001083625 | ANKRD12  | 7024 | 7101 | 5.38718692894      |
| NM_001083625 | ANKRD12  | 1148 | 1213 | 6.38736067171      |
| NM_001012    | RPS8     | 545  | 644  | 2.50054673898      |
| NM_001012    | RPS8     | 21   | 58   | 1.08533548938      |
| NM_001012    | RPS8     | 176  | 358  | 4.25543424114      |
| NM_001012    | RPS8     | 383  | 475  | 1.50054673898      |
| NM_016399    | TRIAP1   | 296  | 378  | 7.81680915467      |
| NM_016399    | TRIAP1   | 192  | 234  | 7.81663541191      |
| NM_016399    | TRIAP1   | 497  | 541  | 6.73266995284      |
| NM_016390    | C9orf114 |      | 1681 | 1760 6.20526858382 |
| NM_016391    | NOP16    | 657  | 702  | 5.95058016917      |
| NM_016391    | NOP16    | 268  | 325  | 5.36578468771      |
| NM_016395    | PTPLAD1  | 2819 | 2853 | 3.08215646089      |
| NM_016395    | PTPLAD1  | 44   | 79   | 4.08215622498      |
| NM_016395    | PTPLAD1  | 386  | 426  | 3.08214972985      |
| NM_016395    | PTPLAD1  | 1624 | 1688 | 5.88951138296      |
| NM_016395    | PTPLAD1  | 1552 | 1619 | 5.08215646089      |
| NM_016395    | PTPLAD1  | 433  | 1119 | 10.4744738837      |
| NM_016395    | PTPLAD1  | 2346 | 2440 | 5.40408455579      |
| NM_016395    | PTPLAD1  | 135  | 381  | 7.66711896162      |
| NM_016395    | PTPLAD1  | 2519 | 2748 | 6.88951138296      |
| NM_016395    | PTPLAD1  | 1707 | 2033 | 7.54158807954      |
| NM_016395    | PTPLAD1  | 1133 | 1486 | 8.40408455579      |
| NM_016395    | PTPLAD1  | 2857 | 3190 | 8.21143947785      |
| NM_016396    | CTDSPL2  | 2500 | 2568 | 6.22088963089      |
| NM_016396    | CTDSPL2  | 2806 | 2855 | 6.21687876177      |
| NM_003249    | THOP1    | 973  | 1009 | 5.34311813313      |
| NM_003249    | THOP1    | 1967 | 2017 | 5.3471357333       |
| NM_003249    | THOP1    | 1242 | 1288 | 6.84795902464      |
| NM_003249    | THOP1    | 600  | 724  | 7.34713573331      |
| NM_003249    | THOP1    | 1622 | 1727 | 7.3471357333       |
| NM_003249    | THOP1    | 1792 | 1928 | 6.93209822648      |
| NM_003249    | THOP1    | 183  | 330  | 7.66906382819      |
| NM_003249    | THOP1    | 415  | 596  | 8.51706073475      |
| NM_003249    | THOP1    | 2291 | 2361 | 6.34712900225      |
| NM_178812    | MTDH     | 3397 | 3467 | 7.31750274605      |
| NM_178812    | MTDH     | 3032 | 3099 | 4.99557441524      |
| NM_178812    | MTDH     | 775  | 810  | 4.99540090084      |
| NM_178812    | MTDH     | 3475 | 3543 | 4.99557465116      |
| NM_178812    | MTDH     | 625  | 770  | 9.1654996526       |
| NM_178812    | MTDH     | 2956 | 3003 | 4.91143544178      |
| NM_178812    | MTDH     | 2764 | 2836 | 4.91143544178      |
| NM_178812    | MTDH     | 3177 | 3263 | 5.99557465116      |
| NM_178812    | MTDH     | 4374 | 4449 | 6.58053715188      |

|              |          |      |      |                   |
|--------------|----------|------|------|-------------------|
| NM_178812    | MTDH     | 257  | 563  | 9.4550062698      |
| NM_178812    | MTDH     | 2378 | 2502 | 7.31750274605     |
| NM_178812    | MTDH     | 832  | 2107 | 12.3443028054     |
| NM_001014433 | CUTA     | 729  | 782  | 8.54718114479     |
| NM_001014433 | CUTA     | 172  | 314  | 9.86910923968     |
| NM_001014433 | CUTA     | 668  | 725  | 6.96204489375     |
| NM_001014433 | CUTA     | 445  | 660  | 10.6060748338     |
| NM_001014433 | CUTA     | 316  | 440  | 9.42165026271     |
| NM_017443    | POLE3    | 1676 | 1762 | 4.15479942262     |
| NM_017443    | POLE3    | 1513 | 1597 | 4.15479942262     |
| NM_017443    | POLE3    | 2146 | 2228 | 4.15479942262     |
| NM_017915    | C12orf48 |      | 112  | 229 11.8057506565 |
| NM_178819    | AGPAT6   | 637  | 684  | 5.33166936299     |
| NM_178819    | AGPAT6   | 1994 | 2070 | 7.33568696316     |
| NM_178819    | AGPAT6   | 241  | 290  | 6.92064273283     |
| NM_178819    | AGPAT6   | 937  | 1036 | 7.92064946388     |
| NM_178819    | AGPAT6   | 1820 | 1886 | 5.33568696316     |
| NM_178819    | AGPAT6   | 2229 | 2315 | 5.33568696294     |
| NM_178819    | AGPAT6   | 1041 | 1115 | 6.33568696316     |
| NM_178819    | AGPAT6   | 1314 | 1384 | 6.33568695561     |
| NM_178819    | AGPAT6   | 3119 | 3197 | 5.33568672724     |
| NM_178819    | AGPAT6   | 2913 | 3033 | 8.5056119646      |
| NM_178819    | AGPAT6   | 1248 | 1306 | 7.33568696316     |
| NM_178819    | AGPAT6   | 2492 | 2679 | 8.14304188522     |
| NM_178819    | AGPAT6   | 784  | 923  | 7.92064946388     |
| NM_178819    | AGPAT6   | 290  | 378  | 7.33568696316     |
| NM_003246    | THBS1    | 5505 | 5599 | 7.75455794593     |
| NM_003246    | THBS1    | 5077 | 5133 | 6.75455794571     |
| NM_003246    | THBS1    | 4452 | 4514 | 6.75455794593     |
| NM_003246    | THBS1    | 4643 | 4705 | 7.75455794593     |
| NM_003246    | THBS1    | 5444 | 5491 | 6.75455771001     |
| NM_003246    | THBS1    | 4709 | 4781 | 9.33952044665     |
| NM_003246    | THBS1    | 644  | 936  | 11.0024854594     |
| NM_003246    | THBS1    | 4138 | 4439 | 10.8838409629     |
| NM_003246    | THBS1    | 4966 | 5047 | 9.07648604082     |
| NM_003246    | THBS1    | 3450 | 3911 | 12.3091467976     |
| NM_003246    | THBS1    | 533  | 644  | 8.75455794593     |
| NM_003246    | THBS1    | 4794 | 4905 | 9.07648604082     |
| NM_003246    | THBS1    | 5202 | 5352 | 8.07648604082     |
| NM_003246    | THBS1    | 100  | 529  | 11.3395204467     |
| NM_003246    | THBS1    | 3947 | 4127 | 10.0024854594     |
| NM_003246    | THBS1    | 1620 | 1982 | 11.3984141357     |
| NM_003246    | THBS1    | 24   | 99   | 8.07648604082     |
| NM_003246    | THBS1    | 936  | 1609 | 12.4410584731     |
| NM_003246    | THBS1    | 1983 | 3429 | 13.4480449034     |
| NM_017916    | PIH1D1   | 241  | 289  | 6.12731273555     |
| NM_017916    | PIH1D1   | 334  | 370  | 6.04318025722     |
| NM_017916    | PIH1D1   | 519  | 561  | 7.62814275794     |
| NM_017916    | PIH1D1   | 626  | 784  | 8.1273194666      |
| NM_017916    | PIH1D1   | 96   | 232  | 7.1273194666      |

|              |        |      |      |               |
|--------------|--------|------|------|---------------|
| NM_153211    | TTC39C | 1284 | 1359 | 6.67074410266 |
| NM_153211    | TTC39C | 1660 | 1701 | 8.25588035348 |
| NM_153211    | TTC39C | 1704 | 1746 | 6.66690025281 |
| NM_153211    | TTC39C | 2158 | 2230 | 6.66690025281 |
| NM_153211    | TTC39C | 1365 | 1411 | 6.67091761706 |
| NM_153211    | TTC39C | 3330 | 3383 | 7.67091761706 |
| NM_153211    | TTC39C | 1147 | 1230 | 6.66690025281 |
| NM_153211    | TTC39C | 882  | 948  | 6.67074410266 |
| NM_153211    | TTC39C | 1431 | 1513 | 7.67091785298 |
| NM_001042414 | PSPC1  | 760  | 796  | 4.34793505189 |
| NM_001042414 | PSPC1  | 586  | 631  | 3.6790070921  |
| NM_001042414 | PSPC1  | 947  | 988  | 3.6790070921  |
| NM_001042414 | PSPC1  | 632  | 743  | 5.08507439638 |
| NM_001042414 | PSPC1  | 1825 | 1897 | 3.75912870132 |
| NM_001042414 | PSPC1  | 1740 | 1824 | 2.76314630149 |
| NM_001042414 | PSPC1  | 134  | 182  | 2.6790070921  |
| NM_001042414 | PSPC1  | 1104 | 1164 | 2.75912870132 |
| NM_001042414 | PSPC1  | 467  | 546  | 5.08507439638 |
| NM_001042414 | PSPC1  | 401  | 463  | 2.76314630149 |
| NM_001042414 | PSPC1  | 1005 | 1101 | 2.76313957043 |
| NM_173791    | PDZD8  | 2062 | 2132 | 7.66160841392 |
| NM_173791    | PDZD8  | 2987 | 3158 | 8.83153365129 |
| NM_173791    | PDZD8  | 793  | 879  | 8.4689635719  |
| NM_173791    | PDZD8  | 141  | 180  | 5.57746944046 |
| NM_173791    | PDZD8  | 1479 | 1553 | 7.24656441951 |
| NM_173791    | PDZD8  | 198  | 282  | 8.24657115056 |
| NM_173791    | PDZD8  | 2728 | 2810 | 7.24657115056 |
| NM_173791    | PDZD8  | 3241 | 3287 | 7.66160864984 |
| NM_173791    | PDZD8  | 3171 | 3234 | 5.65759104967 |
| NM_173791    | PDZD8  | 3287 | 3398 | 7.24657115056 |
| NM_173791    | PDZD8  | 2672 | 2711 | 5.66160864962 |
| NM_173791    | PDZD8  | 2482 | 2545 | 5.65759104967 |
| NM_173791    | PDZD8  | 3662 | 3810 | 8.4689635719  |
| NM_173791    | PDZD8  | 1920 | 1973 | 6.66160191879 |
| NM_173791    | PDZD8  | 1805 | 1874 | 6.66160864984 |
| NM_173791    | PDZD8  | 2170 | 2311 | 8.4689635719  |
| NM_173791    | PDZD8  | 624  | 689  | 5.66160864229 |
| NM_173791    | PDZD8  | 1087 | 1238 | 7.66160864984 |
| NM_173791    | PDZD8  | 2831 | 2960 | 7.66160864984 |
| NM_173791    | PDZD8  | 1244 | 1437 | 9.83153365129 |
| NM_173791    | PDZD8  | 1556 | 1726 | 9.24657115056 |
| NM_173791    | PDZD8  | 2328 | 2450 | 6.66160864984 |
| NM_173791    | PDZD8  | 3445 | 3645 | 8.4689635719  |
| NM_173791    | PDZD8  | 475  | 621  | 7.24657115056 |
| NM_173791    | PDZD8  | 994  | 1063 | 6.66160864984 |
| NM_014415    | ZBTB11 | 1049 | 1144 | 8.71554019271 |
| NM_014415    | ZBTB11 | 961  | 1017 | 8.30050268588 |
| NM_014415    | ZBTB11 | 3378 | 3444 | 6.63140098332 |
| NM_014415    | ZBTB11 | 1472 | 1516 | 6.71152259253 |
| NM_004907    | IER2   | 208  | 258  | 8.68341592645 |

|              |           |      |      |               |               |
|--------------|-----------|------|------|---------------|---------------|
| NM_004907    | IER2      | 1919 | 1959 | 8.68340943131 |               |
| NM_004907    | IER2      | 418  | 451  | 7.59927695298 |               |
| NM_004907    | IER2      | 342  | 394  | 8.67939856219 |               |
| NM_004907    | IER2      | 1338 | 1438 | 9.26837866309 |               |
| NM_004907    | IER2      | 1241 | 1329 | 8.68341616237 |               |
| NM_004905    | PRDX6     | 672  | 716  | 4.09205871522 |               |
| NM_004905    | PRDX6     | 1212 | 1293 | 5.67702793944 |               |
| NM_004905    | PRDX6     | 779  | 813  | 5.00792623689 |               |
| NM_004905    | PRDX6     | 35   | 177  | 7.41399354116 |               |
| NM_004905    | PRDX6     | 936  | 1065 | 7.99895604188 |               |
| NM_004905    | PRDX6     | 1569 | 1612 | 5.67301034682 |               |
| NM_004905    | PRDX6     | 355  | 562  | 8.17952828752 |               |
| NM_004905    | PRDX6     | 568  | 659  | 6.67702794699 |               |
| NM_004905    | PRDX6     | 183  | 341  | 7.41399354116 |               |
| NM_004901    | ENTPD4    | 721  | 771  | 9.33332527318 |               |
| NM_004901    | ENTPD4    | 1307 | 1388 | 8.59635967901 |               |
| NM_004901    | ENTPD4    | 1674 | 1721 | 7.01139694237 |               |
| NM_004901    | ENTPD4    | 1413 | 1480 | 8.59635294796 |               |
| NM_004901    | ENTPD4    | 3773 | 3828 | 7.01122342797 |               |
| NM_004901    | ENTPD4    | 1555 | 1624 | 9.01139044724 |               |
| NM_004901    | ENTPD4    | 1485 | 1548 | 7.00737957812 |               |
| NM_004901    | ENTPD4    | 324  | 412  | 9.01139717829 |               |
| NM_004901    | ENTPD4    | 842  | 1028 | 10.4708287969 |               |
| NM_001199744 | SAA2-SAA4 |      | 589  | 656           | 8.63573347299 |
| NM_001199744 | SAA2-SAA4 |      | 666  | 744           | 9.22069597349 |
| NM_198836    | ACACA     | 3320 | 3383 | 7.64714441063 |               |
| NM_198836    | ACACA     | 1679 | 1734 | 7.23193316104 |               |
| NM_198836    | ACACA     | 4460 | 4514 | 6.64312681046 |               |
| NM_198836    | ACACA     | 3070 | 3119 | 5.56300520125 |               |
| NM_198836    | ACACA     | 4047 | 4117 | 7.23210691135 |               |
| NM_198836    | ACACA     | 8142 | 8219 | 7.23210691135 |               |
| NM_198836    | ACACA     | 1436 | 1481 | 5.64714440308 |               |
| NM_198836    | ACACA     | 4394 | 4457 | 6.64697066032 |               |
| NM_198836    | ACACA     | 2542 | 2596 | 7.23210691135 |               |
| NM_198836    | ACACA     | 5338 | 5387 | 5.64697066032 |               |
| NM_198836    | ACACA     | 1052 | 1098 | 7.23210691135 |               |
| NM_198836    | ACACA     | 4882 | 4938 | 6.64312681046 |               |
| NM_198836    | ACACA     | 4550 | 4627 | 5.64714441063 |               |
| NM_198836    | ACACA     | 4731 | 4783 | 5.56300520125 |               |
| NM_198836    | ACACA     | 1486 | 1530 | 7.14796770197 |               |
| NM_198836    | ACACA     | 6501 | 6545 | 6.64713767958 |               |
| NM_198836    | ACACA     | 1260 | 1351 | 7.23210691135 |               |
| NM_198836    | ACACA     | 333  | 402  | 5.64714440308 |               |
| NM_198836    | ACACA     | 6378 | 6411 | 7.22808931118 |               |
| NM_198836    | ACACA     | 3456 | 3567 | 8.45449933269 |               |
| NM_198836    | ACACA     | 80   | 198  | 7.64714441063 |               |
| NM_198836    | ACACA     | 2961 | 3006 | 7.64713767958 |               |
| NM_198836    | ACACA     | 209  | 323  | 7.23210691135 |               |
| NM_198836    | ACACA     | 3235 | 3317 | 7.23210691135 |               |
| NM_198836    | ACACA     | 6552 | 6646 | 5.64714440308 |               |



|           |          |      |      |               |               |
|-----------|----------|------|------|---------------|---------------|
| NM_198836 | ACACA    | 4999 | 5105 | 7.23210691135 |               |
| NM_198836 | ACACA    | 2457 | 2542 | 6.64714441041 |               |
| NM_198836 | ACACA    | 470  | 533  | 5.64312681046 |               |
| NM_198836 | ACACA    | 4664 | 4731 | 6.64312681046 |               |
| NM_198836 | ACACA    | 5277 | 5329 | 6.64713767958 |               |
| NM_198836 | ACACA    | 913  | 1038 | 7.23210691135 |               |
| NM_198836 | ACACA    | 3843 | 3980 | 7.96907250552 |               |
| NM_198836 | ACACA    | 6036 | 6215 | 7.23210691135 |               |
| NM_198836 | ACACA    | 5112 | 5218 | 6.64714441063 |               |
| NM_198836 | ACACA    | 8679 | 8871 | 8.81706941208 |               |
| NM_198836 | ACACA    | 1796 | 2044 | 9.45449933269 |               |
| NM_198836 | ACACA    | 2123 | 2228 | 7.64714441063 |               |
| NM_000628 | IL10RB   | 109  | 167  | 6.86957980027 |               |
| NM_000628 | IL10RB   | 1632 | 1678 | 5.28445028028 |               |
| NM_000628 | IL10RB   | 1878 | 1938 | 6.28461729955 |               |
| NM_000628 | IL10RB   | 208  | 262  | 6.28060643043 |               |
| NM_000628 | IL10RB   | 616  | 662  | 7.2846240306  |               |
| NM_000628 | IL10RB   | 364  | 441  | 6.869412781   |               |
| NM_000628 | IL10RB   | 994  | 1031 | 5.28445028028 |               |
| NM_000628 | IL10RB   | 789  | 856  | 6.2846240306  |               |
| NM_000628 | IL10RB   | 292  | 341  | 6.28462403038 |               |
| NM_000628 | IL10RB   | 493  | 607  | 8.74405564924 |               |
| NM_000628 | IL10RB   | 1095 | 1225 | 6.28462403038 |               |
| NM_198526 | ZNF710   | 3143 | 3251 | 7.14318858534 |               |
| NM_181699 | PPP2R1B  | 1129 | 1189 | 7.12789329486 |               |
| NM_181699 | PPP2R1B  | 957  | 1007 | 7.04777168565 |               |
| NM_181699 | PPP2R1B  | 297  | 362  | 7.13191089481 |               |
| NM_181699 | PPP2R1B  | 379  | 512  | 8.45383898992 |               |
| NM_181699 | PPP2R1B  | 695  | 728  | 7.13190416398 |               |
| NM_181699 | PPP2R1B  | 181  | 283  | 7.71687339553 |               |
| NM_000624 | SERPINA5 |      | 556  | 1003          | 7.19395682038 |
| NM_000624 | SERPINA5 |      | 422  | 533           | 4.60899431966 |
| NM_000624 | SERPINA5 |      | 47   | 412           | 6.38158382356 |
| NM_000624 | SERPINA5 |      | 1008 | 1779          | 7.831386741   |
| NM_000624 | SERPINA5 |      | 1795 | 2330          | 7.15331483589 |
| NM_139161 | CRB3     | 655  | 723  | 10.5964304151 |               |
| NM_139161 | CRB3     | 933  | 979  | 11.9223761102 |               |
| NM_139161 | CRB3     | 33   | 103  | 9.60027426499 |               |
| NM_139161 | CRB3     | 337  | 450  | 11.6004480153 |               |
| NM_139161 | CRB3     | 586  | 649  | 10.6004477794 |               |
| NM_139161 | CRB3     | 857  | 926  | 9.6004480153  |               |
| NM_003028 | SHB      | 1825 | 1891 | 6.92006971725 |               |
| NM_003028 | SHB      | 1397 | 1426 | 5.83994810804 |               |
| NM_003028 | SHB      | 1442 | 1525 | 7.50904981814 |               |
| NM_003028 | SHB      | 2226 | 2312 | 6.92408731742 |               |
| NM_003028 | SHB      | 1013 | 1055 | 6.92408058637 |               |
| NM_003028 | SHB      | 2174 | 2215 | 7.50503221797 |               |
| NM_003028 | SHB      | 2041 | 2123 | 8.24601541231 |               |
| NM_003028 | SHB      | 1287 | 1359 | 6.9240873172  |               |
| NM_006509 | RELB     | 279  | 344  | 11.1276785154 |               |

|           |        |      |      |               |
|-----------|--------|------|------|---------------|
| NM_006509 | RELB   | 1208 | 1265 | 10.5427160147 |
| NM_006509 | RELB   | 1486 | 1604 | 11.5427162506 |
| NM_006509 | RELB   | 2100 | 2186 | 10.5427160147 |
| NM_006509 | RELB   | 952  | 1051 | 10.5427162506 |
| NM_001017 | RPS13  | 5    | 39   | 1.40765410746 |
| NM_001017 | RPS13  | 160  | 204  | 2.99663420814 |
| NM_001017 | RPS13  | 42   | 155  | 4.99663420836 |
| NM_001017 | RPS13  | 215  | 524  | 6.99663420836 |
| NM_003025 | SH3GL1 | 666  | 733  | 6.80659633532 |
| NM_003025 | SH3GL1 | 573  | 653  | 6.39155883605 |
| NM_003025 | SH3GL1 | 2030 | 2091 | 4.80659609941 |
| NM_003025 | SH3GL1 | 1049 | 1084 | 5.80659632777 |
| NM_003025 | SH3GL1 | 981  | 1029 | 4.80257873515 |
| NM_003025 | SH3GL1 | 1745 | 1776 | 4.80257873515 |
| NM_003025 | SH3GL1 | 1479 | 1551 | 5.80659633532 |
| NM_003025 | SH3GL1 | 1912 | 1983 | 4.80659633532 |
| NM_003025 | SH3GL1 | 2248 | 2423 | 7.39155883605 |
| NM_003025 | SH3GL1 | 461  | 533  | 5.72245712594 |
| NM_003025 | SH3GL1 | 1106 | 1212 | 6.80659633532 |
| NM_139169 | TRUB1  | 2349 | 2393 | 4.69228384463 |
| NM_139169 | TRUB1  | 1291 | 1377 | 6.69245759473 |
| NM_139169 | TRUB1  | 377  | 489  | 5.6924508639  |
| NM_006500 | MCAM   | 2937 | 3005 | 8.03141326031 |
| NM_006500 | MCAM   | 1348 | 1384 | 9.11153486952 |
| NM_006500 | MCAM   | 189  | 252  | 9.11555246968 |
| NM_006500 | MCAM   | 1685 | 1757 | 9.11554573864 |
| NM_006500 | MCAM   | 1018 | 1101 | 10.1155524697 |
| NM_006500 | MCAM   | 1947 | 1976 | 8.03141326031 |
| NM_006500 | MCAM   | 1590 | 1657 | 9.11555246969 |
| NM_006500 | MCAM   | 3129 | 3256 | 11.2854774711 |
| NM_006500 | MCAM   | 21   | 154  | 9.70051497041 |
| NM_006500 | MCAM   | 2803 | 2866 | 8.11555246969 |
| NM_006500 | MCAM   | 923  | 1018 | 9.11555246969 |
| NM_006500 | MCAM   | 1427 | 1554 | 9.70051497041 |
| NM_003021 | SGTA   | 1107 | 1195 | 6.21046871618 |
| NM_003021 | SGTA   | 1033 | 1066 | 5.54136700607 |
| NM_003021 | SGTA   | 124  | 175  | 4.62550621523 |
| NM_003021 | SGTA   | 1486 | 1544 | 6.94743431034 |
| NM_003021 | SGTA   | 1780 | 1861 | 5.62550621546 |
| NM_003021 | SGTA   | 1591 | 1647 | 4.62148861528 |
| NM_003021 | SGTA   | 1873 | 1916 | 6.62550597954 |
| NM_003021 | SGTA   | 1236 | 1277 | 5.54136700607 |
| NM_003021 | SGTA   | 395  | 477  | 5.62550620791 |
| NM_003021 | SGTA   | 989  | 1031 | 4.6254994844  |
| NM_003021 | SGTA   | 803  | 982  | 7.43286113751 |
| NM_003021 | SGTA   | 670  | 766  | 4.62550621523 |
| NM_003021 | SGTA   | 218  | 392  | 7.94743431034 |
| NM_006502 | POLH   | 6563 | 6617 | 8.59481560027 |
| NM_006502 | POLH   | 300  | 362  | 9.59481559273 |
| NM_020448 | NIPAL3 | 2022 | 2100 | 8.89383570612 |

|              |                 |      |      |                    |
|--------------|-----------------|------|------|--------------------|
| NM_020448    | NIPAL3          | 959  | 1046 | 9.89383594182      |
| NM_020448    | NIPAL3          | 1067 | 1126 | 8.80969673266      |
| NM_003993    | CLK2            | 444  | 497  | 4.68171230323      |
| NM_003993    | CLK2            | 1353 | 1434 | 4.59757309406      |
| NM_020440    | PTGFRN          | 1351 | 1381 | 11.64527296        |
| NM_020440    | PTGFRN          | 5760 | 5809 | 11.7294054383      |
| NM_020440    | PTGFRN          | 1202 | 1296 | 11.7294121694      |
| NM_020440    | PTGFRN          | 832  | 946  | 12.1444496687      |
| NM_020440    | PTGFRN          | 2885 | 2917 | 11.64527296        |
| NM_020440    | PTGFRN          | 1297 | 1351 | 11.1442759183      |
| NM_020440    | PTGFRN          | 160  | 208  | 10.1404320685      |
| NM_020440    | PTGFRN          | 4635 | 4733 | 11.1444494327      |
| NM_020440    | PTGFRN          | 3313 | 3377 | 11.7294054383      |
| NM_020440    | PTGFRN          | 3589 | 3623 | 11.1404320685      |
| NM_020440    | PTGFRN          | 382  | 461  | 10.1444496687      |
| NM_020440    | PTGFRN          | 2756 | 2856 | 12.4663777636      |
| NM_020440    | PTGFRN          | 3385 | 3491 | 12.7294121694      |
| NM_020440    | PTGFRN          | 978  | 1060 | 12.7294121694      |
| NM_020440    | PTGFRN          | 1450 | 1704 | 14.6038812873      |
| NM_020440    | PTGFRN          | 3851 | 3930 | 11.7294121694      |
| NM_020440    | PTGFRN          | 2568 | 2719 | 13.4663777636      |
| NM_020440    | PTGFRN          | 3044 | 3190 | 14.0513402643      |
| NM_020440    | PTGFRN          | 4064 | 4403 | 13.3143746701      |
| NM_020440    | PTGFRN          | 1742 | 1851 | 13.1444496687      |
| NM_020440    | PTGFRN          | 1855 | 2110 | 14.7883058584      |
| NM_020440    | PTGFRN          | 2148 | 2219 | 10.1404320685      |
| NM_020440    | PTGFRN          | 5526 | 5593 | 10.1444429376      |
| NM_020440    | PTGFRN          | 2920 | 3026 | 11.7294121694      |
| NM_020440    | PTGFRN          | 220  | 362  | 11.1444496687      |
| NM_020440    | PTGFRN          | 2224 | 2566 | 15.0513402643      |
| NM_025125    | C10orf57        |      | 487  | 605 10.2208400053  |
| NM_020447    | C15orf17        |      | 3456 | 3507 9.50839812646 |
| NM_025126    | RNF34           | 568  | 618  | 5.1948001601       |
| NM_025126    | RNF34           | 1790 | 1875 | 7.27893936948      |
| NM_025126    | RNF34           | 151  | 209  | 6.1948001601       |
| NM_025126    | RNF34           | 793  | 835  | 5.27492176931      |
| NM_001204848 | TNFAIP8L2-SCNM1 | 684  | 684  | 751 7.94026008566  |
| NM_001204848 | TNFAIP8L2-SCNM1 | 1060 | 1060 | 1154 6.94026681672 |
| NM_001204848 | TNFAIP8L2-SCNM1 | 587  | 587  | 645 6.94026008566  |
| NM_002997    | SDC1            | 596  | 660  | 6.38483711587      |
| NM_002997    | SDC1            | 1212 | 1259 | 6.38484383937      |
| NM_002997    | SDC1            | 1264 | 1359 | 5.7998813462       |
| NM_002997    | SDC1            | 346  | 461  | 8.38484384692      |
| NM_002997    | SDC1            | 2065 | 2105 | 5.7998813462       |
| NM_002997    | SDC1            | 462  | 541  | 6.38484384692      |
| NM_002997    | SDC1            | 130  | 200  | 6.38484384692      |
| NM_002997    | SDC1            | 570  | 594  | 4.79586374603      |
| NM_002997    | SDC1            | 3112 | 3154 | 6.30070463754      |
| NM_002997    | SDC1            | 903  | 1005 | 7.7998813462       |
| NM_002997    | SDC1            | 666  | 857  | 6.38484384692      |

|           |        |      |      |                |
|-----------|--------|------|------|----------------|
| NM_002997 | SDC1   | 2655 | 2761 | 7.12180944109  |
| NM_002997 | SDC1   | 287  | 346  | 4.7998813462   |
| NM_002997 | SDC1   | 2782 | 2857 | 4.79988133865  |
| NM_002997 | SDC1   | 1370 | 1532 | 8.7998813462   |
| NM_002997 | SDC1   | 2927 | 3092 | 8.12180944109  |
| NM_002997 | SDC1   | 2108 | 2226 | 7.38484384692  |
| NM_002997 | SDC1   | 1017 | 1172 | 8.25931296484  |
| NM_002997 | SDC1   | 2281 | 2361 | 5.7998813462   |
| NM_002997 | SDC1   | 2368 | 2618 | 9.44373753598  |
| NM_002997 | SDC1   | 1534 | 2035 | 9.75407765659  |
| NM_002996 | CX3CL1 | 2444 | 2496 | 6.71611166671  |
| NM_002996 | CX3CL1 | 1236 | 1291 | 7.45308399193  |
| NM_002996 | CX3CL1 | 3101 | 3194 | 6.13115589704  |
| NM_002996 | CX3CL1 | 884  | 947  | 6.12713829687  |
| NM_002996 | CX3CL1 | 177  | 239  | 7.45308399193  |
| NM_002996 | CX3CL1 | 425  | 459  | 5.13114916599  |
| NM_002996 | CX3CL1 | 1624 | 1712 | 6.71611839776  |
| NM_002996 | CX3CL1 | 1870 | 1934 | 6.71611839776  |
| NM_002996 | CX3CL1 | 372  | 414  | 5.04701668766  |
| NM_002996 | CX3CL1 | 1188 | 1231 | 5.12713829687  |
| NM_002996 | CX3CL1 | 635  | 726  | 5.13115589704  |
| NM_002996 | CX3CL1 | 0    | 152  | 8.71611839776  |
| NM_002996 | CX3CL1 | 1484 | 1566 | 6.13115588949  |
| NM_002996 | CX3CL1 | 250  | 352  | 6.71611839776  |
| NM_002999 | SDC4   | 847  | 908  | 9.87498580601  |
| NM_002999 | SDC4   | 2171 | 2220 | 8.29002330507  |
| NM_002999 | SDC4   | 1213 | 1272 | 8.70506080457  |
| NM_002999 | SDC4   | 1947 | 2061 | 10.4055005227  |
| NM_002999 | SDC4   | 1690 | 1790 | 9.51241572663  |
| NM_002999 | SDC4   | 373  | 424  | 8.28600570512  |
| NM_002999 | SDC4   | 1034 | 1201 | 10.6119514002  |
| NM_002999 | SDC4   | 1619 | 1675 | 8.29002306937  |
| NM_002999 | SDC4   | 437  | 843  | 12.0626128092  |
| NM_002999 | SDC4   | 1794 | 1944 | 9.87498580601  |
| NM_002999 | SDC4   | 931  | 1021 | 7.70506080457  |
| NM_002999 | SDC4   | 38   | 370  | 11.952988318   |
| NM_002999 | SDC4   | 1295 | 1374 | 7.70506080457  |
| NM_002998 | SDC2   | 2581 | 2703 | 3.63532919305  |
| NM_002998 | SDC2   | 1717 | 1776 | 1.63532919305  |
| NM_002998 | SDC2   | 1357 | 1435 | 3.80525419449  |
| NM_002998 | SDC2   | 2706 | 2789 | 3.22029169377  |
| NM_002998 | SDC2   | 1670 | 1707 | 0.63131159288  |
| NM_002998 | SDC2   | 1204 | 1352 | 4.80525419449  |
| NM_002998 | SDC2   | 2209 | 2342 | 3.22029169377  |
| NM_002998 | SDC2   | 499  | 1198 | 7.32182972024  |
| NM_002998 | SDC2   | 332  | 481  | 0.635329193046 |
| NM_002998 | SDC2   | 1776 | 1920 | 3.63532919305  |
| NM_002998 | SDC2   | 1981 | 2186 | 4.63532919305  |
| NM_002998 | SDC2   | 128  | 304  | 4.22029169377  |
| NM_002998 | SDC2   | 1478 | 1664 | 4.22029169377  |

|              |          |      |      |                   |
|--------------|----------|------|------|-------------------|
| NM_001134693 | OST4     | 54   | 200  | 5.68812033385     |
| NM_205767    | C19orf70 |      | 640  | 728 7.57632882814 |
| NM_024834    | MCMBP    | 685  | 733  | 6.5601184454      |
| NM_024834    | MCMBP    | 1931 | 2008 | 7.38122324895     |
| NM_024834    | MCMBP    | 907  | 982  | 7.38122324895     |
| NM_024834    | MCMBP    | 789  | 843  | 6.05929515407     |
| NM_024834    | MCMBP    | 1361 | 1415 | 6.05527755389     |
| NM_024834    | MCMBP    | 1313 | 1358 | 6.64408390447     |
| NM_024834    | MCMBP    | 2106 | 2231 | 6.64425765479     |
| NM_024834    | MCMBP    | 1010 | 1168 | 8.75973487221     |
| NM_024834    | MCMBP    | 2014 | 2083 | 6.05929515407     |
| NM_024834    | MCMBP    | 1484 | 1615 | 7.64425765479     |
| NM_024834    | MCMBP    | 1656 | 1702 | 7.05928842301     |
| NM_024834    | MCMBP    | 1715 | 1880 | 6.64425765479     |
| NM_024834    | MCMBP    | 590  | 670  | 7.64425765479     |
| NM_024834    | MCMBP    | 2590 | 2665 | 6.64425092373     |
| NM_024835    | GGNBP2   | 2185 | 2233 | 4.39386622894     |
| NM_024835    | GGNBP2   | 1742 | 1820 | 4.39386646486     |
| NM_024835    | GGNBP2   | 963  | 1050 | 5.71579455975     |
| NM_024835    | GGNBP2   | 569  | 685  | 4.97882896558     |
| NM_024835    | GGNBP2   | 1175 | 1293 | 5.97882896558     |
| NM_024835    | GGNBP2   | 390  | 467  | 5.71579455952     |
| NM_024835    | GGNBP2   | 1095 | 1163 | 4.38984886469     |
| NM_024835    | GGNBP2   | 847  | 957  | 4.97882896558     |
| NM_024835    | GGNBP2   | 2275 | 2563 | 6.39386646486     |
| NM_024836    | ZNF672   | 2355 | 2418 | 10.0928323932     |
| NM_024836    | ZNF672   | 1290 | 1346 | 10.0928321573     |
| NM_024836    | ZNF672   | 2134 | 2200 | 8.50769614215     |
| NM_006828    | ASCC3    | 1824 | 1887 | 7.88772256632     |
| NM_006828    | ASCC3    | 3191 | 3256 | 7.88772256632     |
| NM_006828    | ASCC3    | 2194 | 2229 | 6.21862085644     |
| NM_006828    | ASCC3    | 856  | 924  | 7.30276005827     |
| NM_006828    | ASCC3    | 6817 | 6872 | 6.30275333477     |
| NM_006828    | ASCC3    | 4149 | 4222 | 7.887722559       |
| NM_006828    | ASCC3    | 6193 | 6249 | 7.30276006582     |
| NM_006828    | ASCC3    | 61   | 114  | 8.30276006582     |
| NM_006828    | ASCC3    | 2262 | 2303 | 7.88772256632     |
| NM_006828    | ASCC3    | 438  | 544  | 7.30276006582     |
| NM_006828    | ASCC3    | 2864 | 2897 | 7.30258631551     |
| NM_006828    | ASCC3    | 5437 | 5479 | 7.88771583549     |
| NM_006828    | ASCC3    | 1732 | 1816 | 7.88772256632     |
| NM_006828    | ASCC3    | 5829 | 5907 | 6.30276005827     |
| NM_006828    | ASCC3    | 3606 | 3658 | 8.30276006582     |
| NM_006828    | ASCC3    | 3335 | 3383 | 8.30258631551     |
| NM_006828    | ASCC3    | 4351 | 4442 | 8.30276006582     |
| NM_006828    | ASCC3    | 1365 | 1419 | 7.21862085644     |
| NM_006828    | ASCC3    | 313  | 389  | 7.88772256654     |
| NM_006828    | ASCC3    | 1921 | 1984 | 8.30276006582     |
| NM_006828    | ASCC3    | 3826 | 3895 | 6.29874246565     |
| NM_006828    | ASCC3    | 5491 | 5553 | 6.30275333477     |

|           |        |      |      |               |
|-----------|--------|------|------|---------------|
| NM_006828 | ASCC3  | 2030 | 2058 | 6.21862085644 |
| NM_006828 | ASCC3  | 7548 | 7596 | 6.29874246565 |
| NM_006828 | ASCC3  | 1115 | 1236 | 8.88772256654 |
| NM_006828 | ASCC3  | 2332 | 2469 | 8.88772256654 |
| NM_006828 | ASCC3  | 6917 | 7015 | 9.11011498788 |
| NM_006828 | ASCC3  | 6461 | 6545 | 7.30275333477 |
| NM_006828 | ASCC3  | 6075 | 6181 | 8.30276006582 |
| NM_006828 | ASCC3  | 3664 | 3734 | 7.88771583549 |
| NM_006828 | ASCC3  | 1420 | 1599 | 8.62468816071 |
| NM_006828 | ASCC3  | 5199 | 5253 | 6.21862085644 |
| NM_006828 | ASCC3  | 5599 | 5764 | 9.11011498788 |
| NM_024830 | LPCAT1 | 787  | 830  | 4.95852690216 |
| NM_024830 | LPCAT1 | 2527 | 2591 | 4.95852667379 |
| NM_024830 | LPCAT1 | 3302 | 3362 | 4.87438770033 |
| NM_024830 | LPCAT1 | 391  | 431  | 3.95450930954 |
| NM_024830 | LPCAT1 | 1019 | 1089 | 3.9585269097  |
| NM_024830 | LPCAT1 | 2207 | 2250 | 5.95835315939 |
| NM_024830 | LPCAT1 | 2136 | 2193 | 3.87438770033 |
| NM_024830 | LPCAT1 | 2351 | 2394 | 5.95852667379 |
| NM_024830 | LPCAT1 | 3373 | 3439 | 4.9585269097  |
| NM_024830 | LPCAT1 | 3636 | 3754 | 5.54348941043 |
| NM_024830 | LPCAT1 | 1243 | 1387 | 7.76588183177 |
| NM_024830 | LPCAT1 | 486  | 714  | 6.2804550046  |
| NM_024830 | LPCAT1 | 830  | 966  | 7.41795852835 |
| NM_024830 | LPCAT1 | 235  | 388  | 5.95852690971 |
| NM_024830 | LPCAT1 | 1128 | 1212 | 3.95852690216 |
| NM_024830 | LPCAT1 | 1559 | 1662 | 3.95852690971 |
| NM_024832 | RIN3   | 430  | 477  | 10.546381447  |
| NM_002871 | RABIF  | 388  | 446  | 7.72898667332 |
| NM_006282 | STK4   | 5973 | 6023 | 3.96132136465 |
| NM_006282 | STK4   | 1994 | 2055 | 5.6304230672  |
| NM_006282 | STK4   | 353  | 438  | 4.04144297386 |
| NM_006282 | STK4   | 5761 | 5806 | 5.04144297386 |
| NM_006282 | STK4   | 6238 | 6274 | 4.04546033811 |
| NM_006282 | STK4   | 4800 | 4844 | 4.04545384298 |
| NM_006282 | STK4   | 1191 | 1251 | 3.96132136465 |
| NM_006282 | STK4   | 6053 | 6157 | 5.04546056648 |
| NM_006282 | STK4   | 973  | 1091 | 5.6304163437  |
| NM_006282 | STK4   | 1627 | 1718 | 5.04545384298 |
| NM_006282 | STK4   | 3927 | 4013 | 5.63042307475 |
| NM_002197 | AC01   | 2085 | 2149 | 8.78224600023 |
| NM_002197 | AC01   | 257  | 315  | 8.78207224991 |
| NM_002197 | AC01   | 3195 | 3231 | 7.77822840005 |
| NM_002197 | AC01   | 736  | 831  | 8.78224600022 |
| NM_002197 | AC01   | 1627 | 1794 | 9.58960092228 |
| NM_002197 | AC01   | 3046 | 3158 | 9.78224600023 |
| NM_002197 | AC01   | 1888 | 1956 | 6.78207224991 |
| NM_002197 | AC01   | 2728 | 2809 | 7.78223926917 |
| NM_002197 | AC01   | 1976 | 2083 | 8.36720850095 |
| NM_002197 | AC01   | 1162 | 1348 | 8.78224600023 |

|              |         |      |      |               |
|--------------|---------|------|------|---------------|
| NM_002197    | AC01    | 1352 | 1549 | 9.95217100167 |
| NM_002194    | INPP1   | 1489 | 1521 | 6.01526017176 |
| NM_002194    | INPP1   | 431  | 481  | 6.09538178097 |
| NM_002194    | INPP1   | 1285 | 1342 | 5.09939937359 |
| NM_002194    | INPP1   | 556  | 592  | 7.09922563082 |
| NM_002194    | INPP1   | 1034 | 1068 | 6.09939265009 |
| NM_002194    | INPP1   | 1744 | 1854 | 6.09939938114 |
| NM_002194    | INPP1   | 843  | 914  | 5.01526017176 |
| NM_002194    | INPP1   | 1525 | 1599 | 6.09939914522 |
| NM_001010983 | GLT8D1  | 1861 | 1924 | 4.16684447205 |
| NM_001010982 | AFMID   | 1208 | 1285 | 6.31352386977 |
| NM_001010982 | AFMID   | 1109 | 1159 | 6.22938466038 |
| NM_001010982 | AFMID   | 891  | 1011 | 7.12087879183 |
| NM_013373    | ZDHHC8  | 462  | 519  | 9.77411042295 |
| NM_013373    | ZDHHC8  | 899  | 947  | 8.69014496389 |
| NM_172231    | SUGP1   | 1939 | 1996 | 5.62318820216 |
| NM_013375    | ABT1    | 1021 | 1050 | 7.08539724907 |
| NM_013375    | ABT1    | 440  | 484  | 5.41629554651 |
| NM_013375    | ABT1    | 1091 | 1154 | 6.50042802484 |
| NM_013374    | PDCD6IP | 1435 | 1510 | 6.32582686543 |
| NM_013374    | PDCD6IP | 2829 | 2864 | 4.73684676454 |
| NM_013374    | PDCD6IP | 1694 | 1759 | 5.73684676454 |
| NM_013374    | PDCD6IP | 3058 | 3104 | 4.74086435716 |
| NM_013374    | PDCD6IP | 1373 | 1433 | 7.06278572855 |
| NM_013374    | PDCD6IP | 360  | 412  | 5.65672515533 |
| NM_013374    | PDCD6IP | 668  | 754  | 6.74086436471 |
| NM_013374    | PDCD6IP | 1550 | 1633 | 5.74086436449 |
| NM_013374    | PDCD6IP | 1781 | 2014 | 7.32582686543 |
| NM_013374    | PDCD6IP | 1109 | 1198 | 5.74086436471 |
| NM_013374    | PDCD6IP | 2113 | 2219 | 6.32582686543 |
| NM_013374    | PDCD6IP | 450  | 530  | 6.74086412879 |
| NM_013374    | PDCD6IP | 2242 | 2404 | 7.32582686543 |
| NM_018252    | TMEM206 | 206  | 278  | 8.05205827626 |
| NM_018252    | TMEM206 | 1083 | 1120 | 10.0518845259 |
| NM_018252    | TMEM206 | 602  | 684  | 10.3739863709 |
| NM_018252    | TMEM206 | 126  | 193  | 9.63701404593 |
| NM_018252    | TMEM206 | 337  | 451  | 9.63702077699 |
| NM_018252    | TMEM206 | 1330 | 1414 | 8.05205804035 |
| NM_001039535 | SKA1    | 439  | 500  | 8.1561053395  |
| NM_001039535 | SKA1    | 826  | 906  | 9.1561053395  |
| NM_001039535 | SKA1    | 1646 | 1750 | 8.16012293967 |
| NM_015336    | ZDHHC17 | 1264 | 1315 | 8.82093467275 |
| NM_015336    | ZDHHC17 | 1627 | 1718 | 8.23597890309 |
| NM_015336    | ZDHHC17 | 4629 | 4689 | 7.1518396937  |
| NM_015336    | ZDHHC17 | 1945 | 2009 | 7.23597889554 |
| NM_015336    | ZDHHC17 | 1740 | 1833 | 8.23597889554 |
| NM_018146    | RNMTL1  | 1005 | 1067 | 5.77602890358 |
| NM_018146    | RNMTL1  | 752  | 804  | 5.77987275343 |
| NM_018145    | FAM82A2 | 1761 | 1836 | 6.75677157944 |
| NM_018145    | FAM82A2 | 434  | 502  | 5.75676484839 |

|           |          |      |      |               |               |
|-----------|----------|------|------|---------------|---------------|
| NM_018145 | FAM82A2  | 1034 | 1076 | 6.75676484839 |               |
| NM_018145 | FAM82A2  | 613  | 660  | 6.75275397927 |               |
| NM_018145 | FAM82A2  | 1156 | 1195 | 7.75677157189 |               |
| NM_018145 | FAM82A2  | 317  | 403  | 7.75677157944 |               |
| NM_018145 | FAM82A2  | 1660 | 1733 | 6.75676484839 |               |
| NM_018145 | FAM82A2  | 1084 | 1154 | 5.75677157944 |               |
| NM_018145 | FAM82A2  | 1586 | 1642 | 7.34156032984 |               |
| NM_018145 | FAM82A2  | 977  | 1027 | 6.75659782912 |               |
| NM_018145 | FAM82A2  | 735  | 832  | 6.75677157944 |               |
| NM_018145 | FAM82A2  | 136  | 270  | 8.34173408016 |               |
| NM_018145 | FAM82A2  | 1295 | 1356 | 7.25759487078 |               |
| NM_018145 | FAM82A2  | 1461 | 1580 | 8.07869967433 |               |
| NM_018144 | SEC61A2  | 1469 | 1517 | 9.19007740606 |               |
| NM_018144 | SEC61A2  | 911  | 1008 | 11.1900841371 |               |
| NM_018144 | SEC61A2  | 1593 | 1650 | 11.1900841369 |               |
| NM_018144 | SEC61A2  | 832  | 898  | 10.1900841371 |               |
| NM_018144 | SEC61A2  | 1259 | 1329 | 11.1900839012 |               |
| NM_018144 | SEC61A2  | 304  | 360  | 10.7710290377 |               |
| NM_018144 | SEC61A2  | 605  | 676  | 9.19008412956 |               |
| NM_018143 | KLHL11   | 1411 | 1470 | 8.98058540814 |               |
| NM_018142 | INTS10   | 1189 | 1236 | 6.47383849951 |               |
| NM_018142 | INTS10   | 1420 | 1486 | 6.47367148024 |               |
| NM_018142 | INTS10   | 592  | 672  | 6.05880749536 |               |
| NM_018142 | INTS10   | 1834 | 1952 | 6.05880773106 |               |
| NM_018142 | INTS10   | 1996 | 2060 | 6.05880749536 |               |
| NM_018142 | INTS10   | 1763 | 1830 | 6.05880100023 |               |
| NM_018142 | INTS10   | 906  | 965  | 5.47384523056 |               |
| NM_018140 | CEP72    | 365  | 432  | 7.66711357814 |               |
| NM_018140 | CEP72    | 231  | 346  | 8.66712030919 |               |
| NM_018140 | CEP72    | 965  | 1076 | 7.66712030919 |               |
| NM_018149 | SMG8     | 2419 | 2499 | 8.03194576756 |               |
| NM_018149 | SMG8     | 2708 | 2802 | 9.3538738549  |               |
| NM_018149 | SMG8     | 1729 | 1790 | 8.61690826828 |               |
| NM_018149 | SMG8     | 2354 | 2416 | 7.0319390365  |               |
| NM_018149 | SMG8     | 2876 | 2945 | 7.03177201724 |               |
| NM_018149 | SMG8     | 646  | 747  | 9.61690826828 |               |
| NM_018149 | SMG8     | 1260 | 1377 | 8.61690826828 |               |
| NM_018149 | SMG8     | 774  | 1053 | 10.0319457676 |               |
| NM_018149 | SMG8     | 146  | 232  | 7.03194576755 |               |
| NM_153354 | TMEM161B |      | 222  | 264           | 9.00643652403 |
| NM_153354 | TMEM161B |      | 1398 | 1461          | 9.42549162326 |
| NM_153354 | TMEM161B |      | 1588 | 1639          | 8.42549162326 |
| NM_153354 | TMEM161B |      | 1016 | 1057          | 7.42548489243 |
| NM_153354 | TMEM161B |      | 1959 | 2026          | 8.42549138756 |
| NM_153354 | TMEM161B |      | 549  | 602           | 8.92631491482 |
| NM_153354 | TMEM161B |      | 1468 | 1588          | 10.0104541242 |
| NM_153354 | TMEM161B |      | 1062 | 1139          | 8.42549162348 |
| NM_153354 | TMEM161B |      | 830  | 941           | 10.4254916235 |
| NM_153354 | TMEM161B |      | 1268 | 1357          | 7.42531787317 |
| NM_153354 | TMEM161B |      | 631  | 759           | 10.2328465455 |



|           |        |      |      |               |
|-----------|--------|------|------|---------------|
| NM_002375 | MAP4   | 2422 | 2482 | 3.86976440106 |
| NM_002375 | MAP4   | 1235 | 1290 | 5.86977113211 |
| NM_002375 | MAP4   | 2316 | 2379 | 5.45473363283 |
| NM_002375 | MAP4   | 508  | 548  | 3.86959738179 |
| NM_002375 | MAP4   | 5010 | 5079 | 6.191699227   |
| NM_002375 | MAP4   | 1048 | 1114 | 4.86976440106 |
| NM_002375 | MAP4   | 3603 | 3629 | 3.78563192273 |
| NM_002375 | MAP4   | 5204 | 5264 | 3.86977113189 |
| NM_002375 | MAP4   | 3283 | 3351 | 3.86977113189 |
| NM_002375 | MAP4   | 4790 | 4833 | 4.78563192273 |
| NM_002375 | MAP4   | 4936 | 5009 | 3.86977113211 |
| NM_002375 | MAP4   | 4457 | 4615 | 3.86977113211 |
| NM_002375 | MAP4   | 3001 | 3087 | 3.86575353194 |
| NM_002375 | MAP4   | 562  | 699  | 5.45473339691 |
| NM_002375 | MAP4   | 4019 | 4116 | 5.45473363282 |
| NM_002375 | MAP4   | 922  | 1047 | 6.191699227   |
| NM_002375 | MAP4   | 6209 | 6283 | 5.45473363283 |
| NM_002372 | MAN2A1 | 6799 | 6857 | 6.21600932698 |
| NM_002372 | MAN2A1 | 2101 | 2203 | 6.2160093272  |
| NM_002372 | MAN2A1 | 4882 | 4915 | 5.13187011782 |
| NM_002372 | MAN2A1 | 6051 | 6100 | 5.21583557688 |
| NM_002372 | MAN2A1 | 4262 | 4311 | 5.80097182792 |
| NM_002372 | MAN2A1 | 2218 | 2273 | 6.2160093272  |
| NM_002372 | MAN2A1 | 4748 | 4794 | 5.2160093272  |
| NM_002372 | MAN2A1 | 4014 | 4073 | 5.80097182792 |
| NM_002372 | MAN2A1 | 996  | 1044 | 4.21199172703 |
| NM_002372 | MAN2A1 | 2004 | 2083 | 5.80097182792 |
| NM_002372 | MAN2A1 | 3520 | 3590 | 5.2160093272  |
| NM_002372 | MAN2A1 | 532  | 600  | 4.21199172703 |
| NM_002372 | MAN2A1 | 1066 | 1175 | 7.2160093272  |
| NM_002372 | MAN2A1 | 2293 | 2514 | 8.67544094584 |
| NM_002372 | MAN2A1 | 1768 | 2000 | 9.07399032233 |
| NM_002372 | MAN2A1 | 3590 | 3715 | 7.38593432864 |
| NM_002372 | MAN2A1 | 2693 | 3108 | 9.12289992281 |
| NM_002372 | MAN2A1 | 1206 | 1314 | 7.02336424926 |
| NM_002372 | MAN2A1 | 5480 | 5563 | 6.21583557688 |
| NM_002372 | MAN2A1 | 4460 | 4622 | 7.67544094584 |
| NM_002372 | MAN2A1 | 3238 | 3424 | 8.2160093272  |
| NM_002372 | MAN2A1 | 3141 | 3216 | 7.2160093272  |
| NM_002372 | MAN2A1 | 3821 | 3928 | 7.02336424926 |
| NM_002372 | MAN2A1 | 2533 | 2675 | 7.91644904534 |
| NM_002372 | MAN2A1 | 1338 | 1753 | 8.91644904534 |
| NM_002372 | MAN2A1 | 4103 | 4245 | 6.2160093272  |
| NM_024529 | CDC73  | 1263 | 1344 | 6.28051098232 |
| NM_024529 | CDC73  | 309  | 353  | 6.19637200886 |
| NM_024529 | CDC73  | 1817 | 1855 | 6.27649361807 |
| NM_024529 | CDC73  | 1539 | 1595 | 6.86547371896 |
| NM_024529 | CDC73  | 721  | 771  | 5.28051121824 |
| NM_024529 | CDC73  | 448  | 498  | 6.86546698791 |
| NM_024529 | CDC73  | 1189 | 1256 | 7.28051121824 |

|           |         |      |      |               |
|-----------|---------|------|------|---------------|
| NM_024529 | CDC73   | 815  | 925  | 7.60243931313 |
| NM_024529 | CDC73   | 1856 | 1912 | 6.27649361807 |
| NM_024523 | GCC1    | 1231 | 1323 | 6.53666476649 |
| NM_024520 | C2orf47 | 645  | 707  | 6.10555700995 |
| NM_024520 | C2orf47 | 1049 | 1121 | 7.69051277984 |
| NM_024520 | C2orf47 | 1137 | 1253 | 8.10555701017 |
| NM_024527 | ABHD8   | 991  | 1023 | 11.0597636732 |
| NM_024527 | ABHD8   | 715  | 756  | 11.7248477831 |
| NM_024524 | ATP13A3 | 6963 | 7067 | 8.00227501456 |
| NM_024524 | ATP13A3 | 5782 | 5914 | 9.15427810801 |
| NM_024524 | ATP13A3 | 5422 | 5506 | 7.41731251384 |
| NM_024524 | ATP13A3 | 728  | 812  | 6.41731251384 |
| NM_024524 | ATP13A3 | 2622 | 2755 | 8.83235001312 |
| NM_024524 | ATP13A3 | 5935 | 5977 | 6.41731227792 |
| NM_024524 | ATP13A3 | 6109 | 6268 | 8.15427810801 |
| NM_024524 | ATP13A3 | 364  | 535  | 9.47620620289 |
| NM_024524 | ATP13A3 | 4546 | 4741 | 8.53278973126 |
| NM_024524 | ATP13A3 | 4176 | 4270 | 7.41731251384 |
| NM_024524 | ATP13A3 | 4992 | 5259 | 8.91981285437 |
| NM_024524 | ATP13A3 | 4074 | 4173 | 7.83235001312 |
| NM_024524 | ATP13A3 | 2363 | 2621 | 9.41731251384 |
| NM_024524 | ATP13A3 | 7087 | 7222 | 7.63970493518 |
| NM_024524 | ATP13A3 | 2758 | 2896 | 8.73924060873 |
| NM_024524 | ATP13A3 | 2154 | 2359 | 9.69033100825 |
| NM_024524 | ATP13A3 | 1461 | 1961 | 11.2586147678 |
| NM_024524 | ATP13A3 | 3711 | 4062 | 10.0418033787 |
| NM_024524 | ATP13A3 | 831  | 1452 | 10.9820971326 |
| NM_024524 | ATP13A3 | 6691 | 6869 | 8.15427810801 |
| NM_024524 | ATP13A3 | 6277 | 6654 | 9.29178163176 |
| NM_024524 | ATP13A3 | 5512 | 5740 | 9.35591196918 |
| NM_024524 | ATP13A3 | 4751 | 4982 | 9.63970493518 |
| NM_024524 | ATP13A3 | 1970 | 2149 | 9.78654632351 |
| NM_024524 | ATP13A3 | 5998 | 6101 | 6.83235001312 |
| NM_024524 | ATP13A3 | 4325 | 4515 | 8.15427810801 |
| NM_024524 | ATP13A3 | 541  | 689  | 9.35591196918 |
| NM_024524 | ATP13A3 | 2903 | 3626 | 11.275293509  |
| NM_024525 | TTC13   | 590  | 662  | 7.12198572719 |
| NM_024525 | TTC13   | 669  | 728  | 8.11797485807 |
| NM_024525 | TTC13   | 313  | 361  | 9.1219924507  |
| NM_024525 | TTC13   | 902  | 978  | 8.70678120865 |
| NM_024525 | TTC13   | 1535 | 1603 | 9.12199245802 |
| NM_024525 | TTC13   | 2546 | 2622 | 8.70694822791 |
| NM_024525 | TTC13   | 797  | 823  | 7.03785324886 |
| NM_024525 | TTC13   | 1657 | 1706 | 7.11797485807 |
| NM_024525 | TTC13   | 1878 | 2012 | 9.12199245825 |
| NM_024525 | TTC13   | 2363 | 2453 | 8.1219924507  |
| NM_024525 | TTC13   | 1366 | 1482 | 7.1219924507  |
| NM_024525 | TTC13   | 1270 | 1350 | 8.12198572719 |
| NM_153358 | ZNF791  | 683  | 712  | 7.83077303755 |
| NM_005973 | PRCC    | 1168 | 1238 | 8.45717636592 |

|              |         |       |       |               |
|--------------|---------|-------|-------|---------------|
| NM_005973    | PRCC    | 63    | 112   | 8.45315876575 |
| NM_005973    | PRCC    | 317   | 386   | 6.86819626503 |
| NM_005973    | PRCC    | 471   | 501   | 7.87204011488 |
| NM_005973    | PRCC    | 1952  | 2014  | 8.8722138652  |
| NM_005973    | PRCC    | 1658  | 1722  | 6.87221386498 |
| NM_005973    | PRCC    | 908   | 989   | 8.45717636592 |
| NM_005973    | PRCC    | 848   | 896   | 7.87221362928 |
| NM_005973    | PRCC    | 2015  | 2100  | 8.45717636592 |
| NM_005973    | PRCC    | 992   | 1108  | 7.8722138652  |
| NM_004498    | ONECUT1 | 1289  | 1362  | 9.54470083346 |
| NM_032410    | H00K3   | 12544 | 12609 | 4.75498422251 |
| NM_032410    | H00K3   | 13665 | 13715 | 4.6748626133  |
| NM_032410    | H00K3   | 12882 | 12939 | 4.75899509163 |
| NM_032410    | H00K3   | 9525  | 9568  | 5.75498422251 |
| NM_032410    | H00K3   | 597   | 634   | 5.75498422251 |
| NM_032410    | H00K3   | 2526  | 2612  | 6.34396432341 |
| NM_032412    | C5orf32 | 822   | 894   | 6.65149606182 |
| NM_032412    | C5orf32 | 143   | 184   | 7.6474851927  |
| NM_032412    | C5orf32 | 186   | 275   | 9.45885771493 |
| NM_032412    | C5orf32 | 424   | 721   | 10.9734308878 |
| NM_001177431 | TRPV4   | 2791  | 2852  | 11.8106608331 |
| NM_001177431 | TRPV4   | 332   | 384   | 11.8068169832 |
| NM_001177431 | TRPV4   | 1669  | 1789  | 14.8108345834 |
| NM_001177431 | TRPV4   | 2238  | 2295  | 11.8106608331 |
| NM_019121    | LRR68   | 972   | 1004  | 5.83568619513 |
| NM_004827    | ABCG2   | 1967  | 2019  | 7.65850532771 |
| NM_004827    | ABCG2   | 2120  | 2165  | 8.15950236937 |
| NM_004827    | ABCG2   | 1821  | 1888  | 7.65867884211 |
| NM_004496    | FOXA1   | 224   | 283   | 7.05843170509 |
| NM_004496    | FOXA1   | 114   | 203   | 7.06244930527 |
| NM_004496    | FOXA1   | 722   | 815   | 6.47748679699 |
| NM_004490    | GRB14   | 1599  | 1650  | 5.32536837232 |
| NM_004490    | GRB14   | 2136  | 2230  | 6.32536837987 |
| NM_004490    | GRB14   | 932   | 962   | 6.32135077969 |
| NM_004490    | GRB14   | 1865  | 2057  | 8.32536837987 |
| NM_004490    | GRB14   | 1401  | 1468  | 5.32536837232 |
| NM_012232    | PTRF    | 3008  | 3067  | 6.19715314937 |
| NM_012232    | PTRF    | 2328  | 2377  | 7.19715314937 |
| NM_012232    | PTRF    | 3299  | 3340  | 7.19732016863 |
| NM_012232    | PTRF    | 3114  | 3197  | 6.19732689968 |
| NM_012232    | PTRF    | 3408  | 3539  | 7.7822894004  |
| NM_012232    | PTRF    | 1873  | 1924  | 7.1131876903  |
| NM_012232    | PTRF    | 1421  | 1498  | 7.7822894004  |
| NM_012232    | PTRF    | 80    | 187   | 8.19732689968 |
| NM_012232    | PTRF    | 664   | 784   | 7.19732689968 |
| NM_012232    | PTRF    | 1498  | 1580  | 7.19732689968 |
| NM_021925    | C2orf43 | 95    | 140   | 6.73922430518 |
| NM_021925    | C2orf43 | 639   | 693   | 7.82335678351 |
| NM_021927    | GUF1    | 521   | 560   | 5.47294440371 |
| NM_021927    | GUF1    | 1140  | 1197  | 5.4689335346  |

|              |          |      |      |                   |
|--------------|----------|------|------|-------------------|
| NM_021927    | GUF1     | 950  | 995  | 6.47295112722     |
| NM_021927    | GUF1     | 1772 | 1828 | 6.47294440371     |
| NM_021927    | GUF1     | 2912 | 2967 | 5.47295113477     |
| NM_021927    | GUF1     | 82   | 130  | 5.47277738445     |
| NM_021927    | GUF1     | 1406 | 1466 | 6.47294440371     |
| NM_021927    | GUF1     | 360  | 491  | 7.79487922965     |
| NM_016208    | VPS28    | 270  | 318  | 7.04753030374     |
| NM_021922    | FANCE    | 2020 | 2077 | 8.89545937504     |
| NM_021928    | SPCS3    | 1797 | 1838 | 6.05421784084     |
| NM_021928    | SPCS3    | 1255 | 1303 | 7.71930195077     |
| NM_021928    | SPCS3    | 3933 | 3974 | 7.72314580063     |
| NM_021928    | SPCS3    | 239  | 367  | 9.30828205167     |
| NM_021928    | SPCS3    | 514  | 648  | 9.83879676837     |
| NM_021928    | SPCS3    | 1084 | 1196 | 8.13835705022     |
| NM_021928    | SPCS3    | 420  | 497  | 8.13835705022     |
| NM_021928    | SPCS3    | 4107 | 4198 | 6.13835705022     |
| NM_021928    | SPCS3    | 93   | 230  | 8.13835705022     |
| NM_015110    | SMC5     | 5878 | 5937 | 4.97085772221     |
| NM_015110    | SMC5     | 3431 | 3503 | 6.97085748629     |
| NM_001006605 | FAM69A   | 447  | 504  | 5.33107122227     |
| NM_001242374 | ANAPC13  | 1204 | 1249 | 4.53274386861     |
| NM_001242374 | ANAPC13  | 469  | 528  | 4.53291761138     |
| NM_001242374 | ANAPC13  | 171  | 235  | 2.94393751804     |
| NM_001242374 | ANAPC13  | 625  | 693  | 4.53274386861     |
| NM_001242374 | ANAPC13  | 706  | 796  | 5.2698832131      |
| NM_001242374 | ANAPC13  | 1717 | 1805 | 4.53291761893     |
| NM_001242374 | ANAPC13  | 1445 | 1527 | 3.94795511066     |
| NM_005195    | CEBPD    | 1001 | 1043 | 8.11272423071     |
| NM_005195    | CEBPD    | 1143 | 1197 | 9.7017043316      |
| NM_015442    | CNOT10   | 1477 | 1565 | 6.44464915413     |
| NM_014806    | RUSC2    | 3621 | 3674 | 10.8559179352     |
| NM_014806    | RUSC2    | 1494 | 1542 | 11.8597617851     |
| NM_014807    | C2CD2L   | 801  | 848  | 7.45364173063     |
| NM_014807    | C2CD2L   | 1279 | 1324 | 7.45364173063     |
| NM_014805    | EPM2AIP1 |      | 838  | 884 6.83466216025 |
| NM_001190737 | NFIB     | 6780 | 6827 | 10.3099318098     |
| NM_014803    | ZNF518A  | 281  | 355  | 7.34768715414     |
| NM_014803    | ZNF518A  | 6649 | 6706 | 6.61071482892     |
| NM_014803    | ZNF518A  | 2718 | 2760 | 4.94161984987     |
| NM_014803    | ZNF518A  | 5545 | 5589 | 5.02575905903     |
| NM_014803    | ZNF518A  | 1752 | 1819 | 6.52658235059     |
| NM_014803    | ZNF518A  | 2056 | 2120 | 4.94161984987     |
| NM_014803    | ZNF518A  | 1629 | 1716 | 6.02575905903     |
| NM_014803    | ZNF518A  | 6519 | 6617 | 6.61072155243     |
| NM_014803    | ZNF518A  | 5402 | 5454 | 6.02174145908     |
| NM_014803    | ZNF518A  | 6029 | 6110 | 5.02558530894     |
| NM_014803    | ZNF518A  | 3596 | 3671 | 6.6067039598      |
| NM_014803    | ZNF518A  | 3824 | 3888 | 5.94161984987     |
| NM_014803    | ZNF518A  | 6834 | 6924 | 5.02575905925     |
| NM_014803    | ZNF518A  | 4503 | 4546 | 6.02174145908     |

|              |         |      |      |               |
|--------------|---------|------|------|---------------|
| NM_014803    | ZNF518A | 4306 | 4363 | 5.0257523282  |
| NM_005358    | LM07    | 3691 | 3734 | 5.792390879   |
| NM_005358    | LM07    | 2135 | 2221 | 5.20742837828 |
| NM_005358    | LM07    | 3565 | 3631 | 5.20341750916 |
| NM_005358    | LM07    | 3851 | 3888 | 4.12329589995 |
| NM_005358    | LM07    | 1837 | 1901 | 4.20742837828 |
| NM_005359    | SMAD4   | 1566 | 1639 | 8.75874110098 |
| NM_005359    | SMAD4   | 886  | 931  | 7.16976100009 |
| NM_005359    | SMAD4   | 814  | 875  | 6.17377859271 |
| NM_005359    | SMAD4   | 1322 | 1371 | 6.17377836434 |
| NM_005359    | SMAD4   | 8113 | 8145 | 7.08963939088 |
| NM_005359    | SMAD4   | 1686 | 1723 | 6.16976100009 |
| NM_005359    | SMAD4   | 2163 | 2216 | 6.16976100009 |
| NM_005359    | SMAD4   | 2005 | 2084 | 7.17377859271 |
| NM_005359    | SMAD4   | 2895 | 2979 | 7.17377859271 |
| NM_005359    | SMAD4   | 999  | 1145 | 8.98113352232 |
| NM_001112732 | MCF2L   | 2211 | 2274 | 6.47765893399 |
| NM_001112732 | MCF2L   | 4710 | 4791 | 8.06279518503 |
| NM_018725    | IL17RB  | 200  | 270  | 6.44956947586 |
| NM_018725    | IL17RB  | 465  | 543  | 6.44956947586 |
| NM_018725    | IL17RB  | 1580 | 1658 | 6.44956947586 |
| NM_018725    | IL17RB  | 391  | 450  | 6.93499630303 |
| NM_018725    | IL17RB  | 288  | 344  | 6.12764138075 |
| NM_018725    | IL17RB  | 1420 | 1505 | 5.12764138097 |
| NM_018725    | IL17RB  | 735  | 898  | 8.21510422223 |
| NM_018725    | IL17RB  | 1020 | 1118 | 7.12764138098 |
| NM_018725    | IL17RB  | 74   | 196  | 7.29756638242 |
| NM_018725    | IL17RB  | 1226 | 1407 | 8.12764138098 |
| NM_018725    | IL17RB  | 543  | 720  | 7.29756638242 |
| NM_018725    | IL17RB  | 944  | 1018 | 5.12763464992 |
| NM_012408    | ZMYND8  | 1410 | 1494 | 3.51743433176 |
| NM_012408    | ZMYND8  | 2022 | 2083 | 3.51743433176 |
| NM_012408    | ZMYND8  | 1515 | 1576 | 3.52144520088 |
| NM_012408    | ZMYND8  | 2950 | 3043 | 4.52145193193 |
| NM_012408    | ZMYND8  | 976  | 1045 | 4.43731272255 |
| NM_012408    | ZMYND8  | 504  | 544  | 3.43731272255 |
| NM_012408    | ZMYND8  | 2083 | 2159 | 4.52145193193 |
| NM_012158    | FBXL3   | 968  | 1066 | 7.32074586772 |
| NM_012158    | FBXL3   | 1094 | 1171 | 8.90571509927 |
| NM_012158    | FBXL3   | 782  | 913  | 9.32075259877 |
| NM_012158    | FBXL3   | 1441 | 1507 | 7.32075259877 |
| NM_012159    | FBXL21  | 534  | 613  | 10.9898919328 |
| NM_001004317 | LIN28B  | 5363 | 5403 | 7.58910155352 |
| NM_001004317 | LIN28B  | 317  | 370  | 7.50496258005 |
| NM_012154    | EIF2C2  | 2749 | 2817 | 8.82586787226 |
| NM_012154    | EIF2C2  | 2891 | 2934 | 6.82185027209 |
| NM_012154    | EIF2C2  | 645  | 686  | 7.82569412195 |
| NM_012154    | EIF2C2  | 747  | 816  | 9.14779596715 |
| NM_012154    | EIF2C2  | 2625 | 2683 | 6.74172866288 |
| NM_012154    | EIF2C2  | 251  | 320  | 7.74172866288 |

|              |        |      |      |               |
|--------------|--------|------|------|---------------|
| NM_012154    | EIF2C2 | 955  | 1181 | 8.41083037298 |
| NM_012154    | EIF2C2 | 3355 | 3428 | 8.41083037298 |
| NM_012154    | EIF2C2 | 2538 | 2625 | 8.41065662267 |
| NM_012401    | PLXNB2 | 151  | 282  | 7.06580349809 |
| NM_012401    | PLXNB2 | 933  | 981  | 6.48084099736 |
| NM_012401    | PLXNB2 | 3089 | 3192 | 6.06580349809 |
| NM_012401    | PLXNB2 | 2451 | 2516 | 5.48084099736 |
| NM_012401    | PLXNB2 | 1890 | 2022 | 7.80276909225 |
| NM_012401    | PLXNB2 | 1776 | 1830 | 5.48084098982 |
| NM_012401    | PLXNB2 | 1656 | 1709 | 4.48066724705 |
| NM_012401    | PLXNB2 | 1736 | 1776 | 6.06580349809 |
| NM_012401    | PLXNB2 | 2067 | 2111 | 5.39670178798 |
| NM_012401    | PLXNB2 | 4736 | 4782 | 5.39670178798 |
| NM_012401    | PLXNB2 | 2553 | 2758 | 8.940272616   |
| NM_012401    | PLXNB2 | 1837 | 1889 | 5.48084099736 |
| NM_012401    | PLXNB2 | 285  | 408  | 7.28819591942 |
| NM_012401    | PLXNB2 | 3412 | 3483 | 5.48084099736 |
| NM_012401    | PLXNB2 | 2113 | 2418 | 9.28819591942 |
| NM_012401    | PLXNB2 | 5995 | 6169 | 7.28819591942 |
| NM_012401    | PLXNB2 | 2776 | 2945 | 6.80276909225 |
| NM_012401    | PLXNB2 | 6171 | 6244 | 4.48083426631 |
| NM_012401    | PLXNB2 | 3202 | 3402 | 8.87315842014 |
| NM_012401    | PLXNB2 | 4639 | 4735 | 6.06580349809 |
| NM_012401    | PLXNB2 | 3485 | 3680 | 7.65076599881 |
| NM_012401    | PLXNB2 | 4083 | 4628 | 9.97269409369 |
| NM_012401    | PLXNB2 | 5724 | 5908 | 7.80276909225 |
| NM_012401    | PLXNB2 | 1    | 124  | 7.65076599881 |
| NM_012401    | PLXNB2 | 414  | 492  | 5.48084099736 |
| NM_012401    | PLXNB2 | 3696 | 4077 | 9.65076599881 |
| NM_012401    | PLXNB2 | 4784 | 5644 | 10.4350373078 |
| NM_012401    | PLXNB2 | 1150 | 1652 | 9.69029436299 |
| NM_012401    | PLXNB2 | 496  | 912  | 9.00440295342 |
| NM_012402    | ARFIP2 | 306  | 359  | 5.40799475102 |
| NM_012402    | ARFIP2 | 576  | 695  | 7.4120123512  |
| NM_005732    | RAD50  | 5352 | 5400 | 4.57698887067 |
| NM_005732    | RAD50  | 3717 | 3809 | 2.9960439699  |
| NM_005732    | RAD50  | 2672 | 2714 | 2.99202636994 |
| NM_005732    | RAD50  | 5068 | 5132 | 3.91190476073 |
| NM_005732    | RAD50  | 367  | 421  | 2.91190476073 |
| NM_001001790 | TOMM5  | 633  | 678  | 3.48190876997 |
| NM_001001790 | TOMM5  | 525  | 585  | 4.06285367074 |
| NM_001001790 | TOMM5  | 82   | 231  | 5.28926369224 |
| NM_001001790 | TOMM5  | 232  | 419  | 5.94134038882 |
| NM_001001790 | TOMM5  | 433  | 519  | 5.28926369224 |
| NM_005731    | ARPC2  | 985  | 1050 | 4.87046183937 |
| NM_005731    | ARPC2  | 154  | 205  | 3.86644423919 |
| NM_005731    | ARPC2  | 72   | 133  | 3.87045510831 |
| NM_005731    | ARPC2  | 502  | 572  | 3.87046160345 |
| NM_005731    | ARPC2  | 227  | 319  | 5.67781676143 |
| NM_005731    | ARPC2  | 739  | 949  | 6.45542434009 |

|           |        |      |      |               |
|-----------|--------|------|------|---------------|
| NM_005731 | ARPC2  | 347  | 501  | 5.87046183937 |
| NM_005731 | ARPC2  | 1170 | 1337 | 5.19238993425 |
| NM_005731 | ARPC2  | 1053 | 1167 | 5.67781676143 |
| NM_005731 | ARPC2  | 572  | 653  | 3.87046183937 |
| NM_182515 | ZNF714 | 4988 | 5057 | 10.2186780089 |
| NM_058179 | PSAT1  | 1720 | 1776 | 3.66190574903 |
| NM_058179 | PSAT1  | 292  | 337  | 3.66207926343 |
| NM_058179 | PSAT1  | 88   | 135  | 2.66190574903 |
| NM_058179 | PSAT1  | 413  | 467  | 4.66207949935 |
| NM_058179 | PSAT1  | 864  | 948  | 4.98400759423 |
| NM_058179 | PSAT1  | 1855 | 1926 | 4.16290279068 |
| NM_058179 | PSAT1  | 2102 | 2152 | 3.66207949912 |
| NM_058179 | PSAT1  | 1393 | 1484 | 4.98400759423 |
| NM_058179 | PSAT1  | 992  | 1067 | 3.66207949912 |
| NM_058179 | PSAT1  | 1503 | 1597 | 4.66207949935 |
| NM_058179 | PSAT1  | 1082 | 1255 | 6.4694344214  |
| NM_058179 | PSAT1  | 732  | 832  | 4.66207949935 |
| NM_058179 | PSAT1  | 136  | 268  | 4.66207949935 |
| NM_058179 | PSAT1  | 1258 | 1316 | 2.66207276829 |
| NM_058179 | PSAT1  | 481  | 569  | 4.24704200007 |
| NM_058179 | PSAT1  | 584  | 724  | 5.98400759423 |
| NM_144710 | SEPT10 | 2624 | 2660 | 3.62919094794 |
| NM_144710 | SEPT10 | 478  | 560  | 4.71315640701 |
| NM_144710 | SEPT10 | 1172 | 1237 | 2.71315640701 |
| NM_144710 | SEPT10 | 913  | 983  | 4.71332342627 |
| NM_144711 | KLHL23 | 1192 | 1309 | 8.28002710141 |
| NM_144711 | KLHL23 | 1608 | 1668 | 6.28002710119 |
| NM_144711 | KLHL23 | 1886 | 1947 | 7.28002037036 |
| NM_144711 | KLHL23 | 3826 | 3882 | 6.28002686549 |
| NM_144711 | KLHL23 | 233  | 312  | 7.27600950124 |
| NM_144711 | KLHL23 | 3085 | 3130 | 7.27600950124 |
| NM_144711 | KLHL23 | 563  | 659  | 7.27600950124 |
| NM_144711 | KLHL23 | 425  | 534  | 7.28002710141 |
| NM_144711 | KLHL23 | 663  | 760  | 8.28002709386 |
| NM_004753 | DHRS3  | 1601 | 1645 | 5.33656356559 |
| NM_004753 | DHRS3  | 1095 | 1161 | 4.92152606632 |
| NM_004753 | DHRS3  | 574  | 665  | 4.92152606632 |
| NM_004753 | DHRS3  | 1514 | 1573 | 5.3365635656  |
| NM_004753 | DHRS3  | 1398 | 1494 | 5.3365635656  |
| NM_004753 | DHRS3  | 22   | 178  | 6.14391848766 |
| NM_004753 | DHRS3  | 727  | 1014 | 6.65849166049 |
| NM_004753 | DHRS3  | 211  | 473  | 6.92152606632 |
| NM_004753 | DHRS3  | 1196 | 1351 | 6.14391848766 |
| NM_001500 | GMDS   | 571  | 659  | 4.76787498243 |
| NM_001500 | GMDS   | 754  | 831  | 4.76787498243 |
| NM_001500 | GMDS   | 664  | 713  | 2.36180767816 |
| NM_001500 | GMDS   | 438  | 492  | 2.44594688732 |
| NM_001500 | GMDS   | 504  | 557  | 2.44577313723 |
| NM_001500 | GMDS   | 354  | 430  | 4.03090915235 |
| NM_001500 | GMDS   | 1261 | 1335 | 2.44594015649 |

|              |         |      |      |               |
|--------------|---------|------|------|---------------|
| NM_001500    | GMDS    | 1121 | 1259 | 5.61587188899 |
| NM_001500    | GMDS    | 872  | 1052 | 5.2533018096  |
| NM_001500    | GMDS    | 1526 | 1583 | 2.44192928737 |
| NM_004751    | GCNT3   | 1058 | 1129 | 9.06621087901 |
| NM_004751    | GCNT3   | 404  | 478  | 9.07022847163 |
| NM_004751    | GCNT3   | 866  | 923  | 9.07022824326 |
| NM_004751    | GCNT3   | 482  | 611  | 11.0702284792 |
| NM_004751    | GCNT3   | 1755 | 1807 | 9.07022824326 |
| NM_004751    | GCNT3   | 103  | 150  | 10.066210879  |
| NM_004751    | GCNT3   | 202  | 300  | 9.07022174813 |
| NM_004751    | GCNT3   | 1464 | 1537 | 10.6551909724 |
| NM_001505    | GPER    | 739  | 766  | 8.65391142013 |
| NM_001505    | GPER    | 2609 | 2653 | 8.6498938275  |
| NM_001505    | GPER    | 884  | 919  | 8.56977221829 |
| NM_001505    | GPER    | 921  | 1027 | 10.6539114277 |
| NM_001056    | SULT1C2 | 637  | 672  | 6.21421160251 |
| NM_001056    | SULT1C2 | 793  | 876  | 8.29835081189 |
| NM_001056    | SULT1C2 | 1402 | 1483 | 7.88331331261 |
| NM_001056    | SULT1C2 | 399  | 477  | 6.29433321172 |
| NM_001056    | SULT1C2 | 1296 | 1351 | 6.29433321172 |
| NM_001056    | SULT1C2 | 945  | 996  | 7.29433321172 |
| NM_001055    | SULT1A1 | 956  | 1057 | 4.75640131045 |
| NM_001055    | SULT1A1 | 794  | 848  | 3.67226210106 |
| NM_001054    | SULT1A2 | 754  | 808  | 4.30542747515 |
| NM_001054    | SULT1A2 | 620  | 677  | 5.38554908436 |
| NM_001015050 | ALG1L   | 385  | 429  | 8.98966572686 |
| NM_001015050 | ALG1L   | 447  | 515  | 10.9896657269 |
| NM_100486    | WAC     | 102  | 174  | 4.78610970205 |
| NM_100486    | WAC     | 1810 | 1878 | 4.20114720888 |
| NM_100486    | WAC     | 733  | 880  | 6.90158692702 |
| NM_100486    | WAC     | 1730 | 1803 | 4.20114720888 |
| NM_100486    | WAC     | 2161 | 2202 | 3.20114720133 |
| NM_100486    | WAC     | 2912 | 2982 | 4.20114697296 |
| NM_100486    | WAC     | 971  | 1064 | 5.7861097096  |
| NM_100486    | WAC     | 4019 | 4087 | 3.20114720888 |
| NM_100486    | WAC     | 2671 | 2773 | 4.20114720888 |
| NM_100486    | WAC     | 1069 | 1146 | 3.20114720133 |
| NM_100486    | WAC     | 2036 | 2074 | 4.1971296087  |
| NM_100486    | WAC     | 456  | 526  | 4.7861097096  |
| NM_100486    | WAC     | 209  | 282  | 5.20114720888 |
| NM_100486    | WAC     | 2290 | 2412 | 6.20114720888 |
| NM_100486    | WAC     | 1880 | 1962 | 4.20114720133 |
| NM_016156    | MTMR2   | 1383 | 1492 | 6.41954458511 |
| NM_016099    | GOLGA7  | 587  | 637  | 3.37295457045 |
| NM_016099    | GOLGA7  | 1378 | 1417 | 3.29283296124 |
| NM_016093    | RPL26L1 | 564  | 606  | 5.26705578925 |
| NM_016091    | EIF3L   | 659  | 714  | 3.58722175831 |
| NM_016091    | EIF3L   | 1534 | 1620 | 1.5872217583  |
| NM_016091    | EIF3L   | 1107 | 1174 | 3.58722175831 |
| NM_016091    | EIF3L   | 942  | 998  | 3.17218425903 |



|           |        |       |       |               |
|-----------|--------|-------|-------|---------------|
| NM_016091 | EIF3L  | 875   | 930   | 1.58722152239 |
| NM_016091 | EIF3L  | 116   | 216   | 3.90914985319 |
| NM_016091 | EIF3L  | 524   | 635   | 4.90914985319 |
| NM_016091 | EIF3L  | 1722  | 1801  | 3.58722175831 |
| NM_016091 | EIF3L  | 1639  | 1719  | 2.58722175831 |
| NM_016091 | EIF3L  | 1023  | 1105  | 3.17218425903 |
| NM_016091 | EIF3L  | 768   | 871   | 2.58722175831 |
| NM_016091 | EIF3L  | 269   | 480   | 5.17218425903 |
| NM_016091 | EIF3L  | 1216  | 1374  | 4.17218425903 |
| NM_016091 | EIF3L  | 1830  | 1938  | 3.17218425903 |
| NM_022366 | TFB2M  | 727   | 776   | 6.38259304869 |
| NM_022366 | TFB2M  | 1005  | 1065  | 6.38259304869 |
| NM_022366 | TFB2M  | 223   | 333   | 6.38661064886 |
| NM_016095 | GINS2  | 393   | 455   | 5.13799643618 |
| NM_016095 | GINS2  | 129   | 183   | 7.22213563801 |
| NM_016095 | GINS2  | 748   | 832   | 6.80709813873 |
| NM_022365 | DNAJC1 | 1026  | 1098  | 6.06859173332 |
| NM_022365 | DNAJC1 | 425   | 483   | 5.48362923259 |
| NM_022365 | DNAJC1 | 489   | 550   | 4.47961163243 |
| NM_022365 | DNAJC1 | 1117  | 1244  | 7.94306085124 |
| NM_022365 | DNAJC1 | 1360  | 1479  | 7.80555732749 |
| NM_022365 | DNAJC1 | 1774  | 1850  | 6.80555732749 |
| NM_022365 | DNAJC1 | 281   | 331   | 5.48345548228 |
| NM_022365 | DNAJC1 | 558   | 939   | 9.43782554299 |
| NM_022365 | DNAJC1 | 1245  | 1314  | 4.48362922505 |
| NM_022365 | DNAJC1 | 1870  | 1923  | 4.48362922505 |
| NM_000454 | SOD1   | 608   | 701   | 2.99954717394 |
| NM_000454 | SOD1   | 354   | 478   | 4.41458467322 |
| NM_000454 | SOD1   | 479   | 604   | 3.41458467322 |
| NM_000454 | SOD1   | 103   | 350   | 4.11502439136 |
| NM_000455 | STK11  | 717   | 786   | 4.36468868462 |
| NM_000455 | STK11  | 910   | 992   | 6.448827894   |
| NM_000455 | STK11  | 2117  | 2179  | 6.03379039472 |
| NM_000455 | STK11  | 1575  | 1629  | 4.44882116295 |
| NM_000455 | STK11  | 1131  | 1180  | 4.44882765808 |
| NM_000457 | HNF4A  | 3055  | 3103  | 4.58932438432 |
| NM_000457 | HNF4A  | 798   | 860   | 6.1781307349  |
| NM_000457 | HNF4A  | 4130  | 4219  | 4.59333525344 |
| NM_000457 | HNF4A  | 3506  | 3558  | 5.50920277511 |
| NM_000457 | HNF4A  | 1704  | 1807  | 6.17830448522 |
| NM_000457 | HNF4A  | 2991  | 3049  | 4.50920277511 |
| NM_000457 | HNF4A  | 3933  | 3966  | 6.09416527583 |
| NM_000457 | HNF4A  | 116   | 209   | 5.59334198449 |
| NM_000457 | HNF4A  | 674   | 762   | 6.17830448522 |
| NM_000457 | HNF4A  | 1015  | 1132  | 4.5933419845  |
| NM_006885 | ZFH3   | 13876 | 13933 | 6.51239717762 |
| NM_006885 | ZFH3   | 10523 | 10588 | 6.51222342731 |
| NM_006885 | ZFH3   | 7610  | 7663  | 6.50837957745 |
| NM_006885 | ZFH3   | 13182 | 13232 | 6.51239044657 |
| NM_006885 | ZFH3   | 13009 | 13126 | 8.09735294729 |

|              |         |      |      |               |
|--------------|---------|------|------|---------------|
| NM_006887    | ZFP36L2 | 252  | 420  | 9.06096866879 |
| NM_006887    | ZFP36L2 | 172  | 224  | 6.47600616807 |
| NM_006887    | ZFP36L2 | 856  | 921  | 7.47600616052 |
| NM_006887    | ZFP36L2 | 2469 | 2581 | 10.0609686688 |
| NM_006887    | ZFP36L2 | 1134 | 1264 | 6.47600616807 |
| NM_006887    | ZFP36L2 | 3238 | 3299 | 7.39186695868 |
| NM_006887    | ZFP36L2 | 2088 | 2202 | 7.47600616807 |
| NM_006887    | ZFP36L2 | 1888 | 2055 | 8.06096866879 |
| NM_006887    | ZFP36L2 | 2914 | 3010 | 8.47600616807 |
| NM_006888    | CALM1   | 318  | 380  | 3.45310898009 |
| NM_006888    | CALM1   | 3587 | 3647 | 3.44909137992 |
| NM_006888    | CALM1   | 2128 | 2200 | 1.86797272905 |
| NM_006888    | CALM1   | 190  | 310  | 5.19007457426 |
| NM_006888    | CALM1   | 2304 | 2356 | 2.8641288792  |
| NM_006888    | CALM1   | 816  | 885  | 1.86814647182 |
| NM_006888    | CALM1   | 383  | 482  | 4.67550140143 |
| NM_006888    | CALM1   | 543  | 740  | 4.86814647937 |
| NM_006888    | CALM1   | 1393 | 1526 | 4.19007457426 |
| NM_006888    | CALM1   | 964  | 1023 | 4.19007457426 |
| NM_006888    | CALM1   | 1107 | 1370 | 5.32757809801 |
| NM_001142573 | IMPDH1  | 774  | 821  | 5.0894328205  |
| NM_001142573 | IMPDH1  | 2213 | 2260 | 6.08942608945 |
| NM_001142573 | IMPDH1  | 1310 | 1375 | 6.08925907019 |
| NM_001142573 | IMPDH1  | 670  | 765  | 5.0894328205  |
| NM_001142573 | IMPDH1  | 216  | 338  | 6.67439508531 |
| NM_001164319 | FLNB    | 3764 | 3822 | 4.04534661459 |
| NM_001164319 | FLNB    | 4899 | 4959 | 5.36728144053 |
| NM_001164319 | FLNB    | 2025 | 2065 | 3.04517959532 |
| NM_001164319 | FLNB    | 6906 | 7025 | 4.63031584636 |
| NM_001164319 | FLNB    | 5403 | 5487 | 3.04535334564 |
| NM_001164319 | FLNB    | 6520 | 6568 | 4.63031584636 |
| NM_001164319 | FLNB    | 2496 | 2579 | 5.63031584636 |
| NM_001164319 | FLNB    | 591  | 628  | 4.63014209604 |
| NM_001164319 | FLNB    | 1931 | 2024 | 5.36728144053 |
| NM_001164319 | FLNB    | 2729 | 2808 | 3.04535334542 |
| NM_001164319 | FLNB    | 5838 | 5915 | 4.63031584636 |
| NM_001164319 | FLNB    | 3999 | 4041 | 4.04535310972 |
| NM_001164319 | FLNB    | 8869 | 8929 | 4.63031584636 |
| NM_001164319 | FLNB    | 7601 | 7651 | 3.04534661459 |
| NM_001164319 | FLNB    | 2952 | 3045 | 5.63031584636 |
| NM_001164319 | FLNB    | 3634 | 3755 | 5.04535334564 |
| NM_001164319 | FLNB    | 2138 | 2210 | 5.63031584636 |
| NM_001164319 | FLNB    | 6395 | 6520 | 5.8527082677  |
| NM_001164319 | FLNB    | 2399 | 2487 | 5.36728144053 |
| NM_001164319 | FLNB    | 6268 | 6374 | 5.63031584636 |
| NM_001164319 | FLNB    | 4227 | 4330 | 4.63031584636 |
| NM_001164319 | FLNB    | 782  | 873  | 5.36728144053 |
| NM_001164319 | FLNB    | 3846 | 3961 | 5.36728144053 |
| NM_001164319 | FLNB    | 4069 | 4098 | 2.96121413626 |
| NM_001164319 | FLNB    | 4714 | 4879 | 5.04535334564 |

|              |          |      |      |               |               |
|--------------|----------|------|------|---------------|---------------|
| NM_001164319 | FLNB     | 6110 | 6263 | 5.36728144053 |               |
| NM_001164319 | FLNB     | 55   | 317  | 6.36728144053 |               |
| NM_001164319 | FLNB     | 1543 | 1691 | 5.63031584636 |               |
| NM_001164319 | FLNB     | 1229 | 1321 | 4.04535310972 |               |
| NM_001164319 | FLNB     | 3343 | 3509 | 5.36728144053 |               |
| NM_001164319 | FLNB     | 400  | 521  | 5.8527082677  |               |
| NM_001164319 | FLNB     | 2830 | 2951 | 6.36728144053 |               |
| NM_001164319 | FLNB     | 2210 | 2292 | 3.04535334542 |               |
| NM_001164319 | FLNB     | 5534 | 5813 | 6.36728144053 |               |
| NM_001164319 | FLNB     | 975  | 1126 | 5.04535334564 |               |
| NM_001164319 | FLNB     | 5010 | 5245 | 5.63031584636 |               |
| NM_020145    | SH3GLB2  | 1965 | 2025 | 6.74385073954 |               |
| NM_006469    | IVNS1ABP |      | 4075 | 4148          | 3.90496027662 |
| NM_006469    | IVNS1ABP |      | 1899 | 1960          | 5.48992950839 |
| NM_006469    | IVNS1ABP |      | 1523 | 1561          | 4.9009494075  |
| NM_006469    | IVNS1ABP |      | 1834 | 1890          | 5.4899295084  |
| NM_006469    | IVNS1ABP |      | 3546 | 3595          | 3.82082779829 |
| NM_006469    | IVNS1ABP |      | 833  | 893           | 6.22689510256 |
| NM_006469    | IVNS1ABP |      | 2171 | 2248          | 4.90496700013 |
| NM_006469    | IVNS1ABP |      | 1961 | 2129          | 6.90496700768 |
| NM_006469    | IVNS1ABP |      | 143  | 308           | 6.22689510256 |
| NM_006469    | IVNS1ABP |      | 688  | 758           | 3.90496700013 |
| NM_006469    | IVNS1ABP |      | 2684 | 2774          | 6.22689510256 |
| NM_006469    | IVNS1ABP |      | 2342 | 2436          | 5.4899295084  |
| NM_020143    | PN01     | 324  | 489  | 5.41241487902 |               |
| NM_016275    | SELT     | 847  | 915  | 7.77425686506 |               |
| NM_016275    | SELT     | 1996 | 2063 | 8.77023926511 |               |
| NM_016275    | SELT     | 453  | 511  | 8.77023926511 |               |
| NM_016275    | SELT     | 619  | 767  | 10.9441818667 |               |
| NM_016275    | SELT     | 513  | 590  | 9.77425013423 |               |
| NM_017953    | ZNHIT6   | 979  | 1019 | 6.69862757859 |               |
| NM_007275    | TUSC2    | 70   | 115  | 5.83178536225 |               |
| NM_007275    | TUSC2    | 291  | 345  | 5.83177863874 |               |
| NM_012228    | MSRB2    | 262  | 306  | 7.1144950018  |               |
| NM_012228    | MSRB2    | 457  | 533  | 9.19863421118 |               |
| NM_006461    | SPAG5    | 859  | 916  | 5.86235457627 |               |
| NM_006461    | SPAG5    | 570  | 614  | 6.86218106187 |               |
| NM_006461    | SPAG5    | 1057 | 1183 | 8.66970973425 |               |
| NM_006461    | SPAG5    | 3638 | 3671 | 7.44731730536 |               |
| NM_006461    | SPAG5    | 921  | 966  | 5.85833721202 |               |
| NM_006461    | SPAG5    | 2686 | 2772 | 8.18428290708 |               |
| NM_006461    | SPAG5    | 144  | 275  | 7.44731731291 |               |
| NM_006461    | SPAG5    | 402  | 461  | 5.86218106187 |               |
| NM_006461    | SPAG5    | 1012 | 1047 | 5.85833721202 |               |
| NM_006461    | SPAG5    | 296  | 365  | 5.86234808114 |               |
| NM_006461    | SPAG5    | 685  | 788  | 7.44731731291 |               |
| NM_006461    | SPAG5    | 792  | 845  | 7.44731731291 |               |
| NM_006461    | SPAG5    | 2012 | 2110 | 5.86235481219 |               |
| NM_006461    | SPAG5    | 1673 | 1773 | 7.86235480464 |               |
| NM_006461    | SPAG5    | 2113 | 2251 | 5.86235481219 |               |

|              |                |      |      |               |               |
|--------------|----------------|------|------|---------------|---------------|
| NM_006461    | SPAG5          | 1296 | 1439 | 8.44731731291 |               |
| NM_006461    | SPAG5          | 1482 | 1562 | 6.86234808114 |               |
| NM_007274    | ACOT7          | 1533 | 1659 | 8.51119828472 |               |
| NM_007274    | ACOT7          | 1135 | 1229 | 7.70384336244 |               |
| NM_007274    | ACOT7          | 1023 | 1132 | 8.51119828472 |               |
| NM_001198974 | TMEM110-MUSTN1 | 599  | 639  | 10.3163984053 |               |
| NM_003100    | SNX2           | 3440 | 3473 | 5.9898729344  |               |
| NM_003100    | SNX2           | 1035 | 1137 | 6.07383839346 |               |
| NM_001198973 | KIAA1522       |      | 2032 | 2091          | 6.47710675597 |
| NM_001198973 | KIAA1522       |      | 1856 | 1937          | 8.47710675597 |
| NM_001198973 | KIAA1522       |      | 1949 | 2003          | 5.4730891558  |
| NM_001198973 | KIAA1522       |      | 683  | 746           | 5.47710675575 |
| NM_001198973 | KIAA1522       |      | 1517 | 1591          | 8.64703175741 |
| NM_001198973 | KIAA1522       |      | 355  | 401           | 6.97793004731 |
| NM_001198973 | KIAA1522       |      | 2285 | 2392          | 8.47710675597 |
| NM_001198973 | KIAA1522       |      | 1414 | 1462          | 5.47693300565 |
| NM_001198973 | KIAA1522       |      | 2420 | 2502          | 5.47710675597 |
| NM_001198973 | KIAA1522       |      | 1718 | 1811          | 7.79903485086 |
| NM_001198973 | KIAA1522       |      | 747  | 847           | 7.06206925669 |
| NM_001198973 | KIAA1522       |      | 1266 | 1359          | 5.47710675597 |
| NM_001001894 | TTC3           | 4261 | 4375 | 4.62040408208 |               |
| NM_001001894 | TTC3           | 7385 | 7467 | 3.6205778324  |               |
| NM_001001894 | TTC3           | 155  | 222  | 5.20553360207 |               |
| NM_001001894 | TTC3           | 1355 | 1397 | 5.12140112374 |               |
| NM_001001894 | TTC3           | 5261 | 5324 | 3.61656023223 |               |
| NM_001001894 | TTC3           | 6541 | 6586 | 4.61656023223 |               |
| NM_001001894 | TTC3           | 1719 | 1792 | 4.62057783239 |               |
| NM_001001894 | TTC3           | 868  | 946  | 5.20554033311 |               |
| NM_001001894 | TTC3           | 6882 | 6978 | 4.62057782485 |               |
| NM_001001894 | TTC3           | 978  | 1055 | 3.62040408208 |               |
| NM_001001894 | TTC3           | 6436 | 6484 | 3.53643862301 |               |
| NM_001001894 | TTC3           | 7129 | 7242 | 5.20554033312 |               |
| NM_007270    | FKBP9          | 360  | 483  | 8.59069429956 |               |
| NM_007270    | FKBP9          | 649  | 730  | 6.71622518165 |               |
| NM_007270    | FKBP9          | 1563 | 1620 | 7.13126268093 |               |
| NM_007270    | FKBP9          | 514  | 619  | 7.71622518165 |               |
| NM_007270    | FKBP9          | 745  | 823  | 7.45319077581 |               |
| NM_007270    | FKBP9          | 2971 | 3052 | 6.13126268093 |               |
| NM_007270    | FKBP9          | 3386 | 3442 | 5.12724508075 |               |
| NM_007270    | FKBP9          | 1353 | 1547 | 8.71622518165 |               |
| NM_007270    | FKBP9          | 877  | 1019 | 8.45319077581 |               |
| NM_007270    | FKBP9          | 1023 | 1328 | 8.71622518165 |               |
| NM_007270    | FKBP9          | 1722 | 1944 | 7.13126268093 |               |
| NM_007270    | FKBP9          | 2657 | 2733 | 6.1312626807  |               |
| NM_007270    | FKBP9          | 228  | 291  | 5.13126268092 |               |
| NM_007221    | PMF1           | 823  | 941  | 9.6879047674  |               |
| NM_007221    | PMF1           | 214  | 380  | 8.6879047674  |               |
| NM_181733    | COG5           | 1326 | 1383 | 7.46439003252 |               |
| NM_181733    | COG5           | 917  | 981  | 5.8794275318  |               |
| NM_181733    | COG5           | 2642 | 2716 | 6.87960128212 |               |

|           |         |      |      |               |
|-----------|---------|------|------|---------------|
| NM_181733 | COG5    | 661  | 785  | 6.87960128212 |
| NM_181733 | COG5    | 1980 | 2068 | 7.46456378284 |
| NM_181733 | COG5    | 1638 | 1696 | 5.87558368194 |
| NM_153252 | BRWD3   | 699  | 753  | 5.20059649693 |
| NM_153252 | BRWD3   | 12   | 41   | 5.28456195599 |
| NM_015629 | PRPF31  | 1331 | 1385 | 4.52609173402 |
| NM_015629 | PRPF31  | 675  | 727  | 5.52626547679 |
| NM_015629 | PRPF31  | 799  | 875  | 4.52625875329 |
| NM_194291 | TMEM65  | 1028 | 1072 | 8.92735544501 |
| NM_003907 | EIF2B5  | 777  | 826  | 7.45948049881 |
| NM_003907 | EIF2B5  | 2301 | 2356 | 7.0446167423  |
| NM_003907 | EIF2B5  | 585  | 632  | 6.45964751808 |
| NM_003907 | EIF2B5  | 635  | 688  | 6.45965424158 |
| NM_003907 | EIF2B5  | 1438 | 1472 | 7.04444299953 |
| NM_003907 | EIF2B5  | 490  | 537  | 5.45964751808 |
| NM_003907 | EIF2B5  | 1604 | 1666 | 5.45948049881 |
| NM_003907 | EIF2B5  | 2199 | 2266 | 5.45965424158 |
| NM_003907 | EIF2B5  | 1025 | 1169 | 7.45965424913 |
| NM_003906 | MCM3AP  | 2430 | 2507 | 8.1535192408  |
| NM_003906 | MCM3AP  | 1947 | 2032 | 5.8315911459  |
| NM_003906 | MCM3AP  | 150  | 211  | 7.41253604646 |
| NM_003906 | MCM3AP  | 2237 | 2304 | 6.83141739559 |
| NM_003906 | MCM3AP  | 2898 | 2986 | 6.83159114591 |
| NM_003906 | MCM3AP  | 5395 | 5445 | 5.82757354574 |
| NM_003906 | MCM3AP  | 3957 | 4004 | 5.82757354574 |
| NM_003906 | MCM3AP  | 4019 | 4079 | 5.83159113836 |
| NM_003906 | MCM3AP  | 4635 | 4684 | 5.8315911459  |
| NM_003906 | MCM3AP  | 4795 | 4864 | 8.1535192408  |
| NM_003906 | MCM3AP  | 5    | 54   | 7.83159090999 |
| NM_003906 | MCM3AP  | 4932 | 4975 | 7.83159113836 |
| NM_003906 | MCM3AP  | 2681 | 2758 | 7.41655364663 |
| NM_003906 | MCM3AP  | 1147 | 1216 | 7.41655341071 |
| NM_003906 | MCM3AP  | 2803 | 2871 | 6.83159114569 |
| NM_003906 | MCM3AP  | 5738 | 5852 | 7.41655364663 |
| NM_003906 | MCM3AP  | 5913 | 5984 | 5.83159114591 |
| NM_003906 | MCM3AP  | 4985 | 5016 | 6.83141739559 |
| NM_003906 | MCM3AP  | 459  | 560  | 5.83158441486 |
| NM_003906 | MCM3AP  | 345  | 418  | 5.83159090999 |
| NM_003906 | MCM3AP  | 2128 | 2163 | 6.82757354574 |
| NM_003906 | MCM3AP  | 4142 | 4298 | 7.41655364663 |
| NM_003906 | MCM3AP  | 3524 | 3706 | 6.83159114591 |
| NM_003906 | MCM3AP  | 5651 | 5734 | 7.41655364663 |
| NM_003906 | MCM3AP  | 3226 | 3365 | 7.83159114591 |
| NM_199359 | TPD52L2 | 575  | 636  | 3.66955230341 |
| NM_199359 | TPD52L2 | 1415 | 1489 | 4.99148040584 |
| NM_199359 | TPD52L2 | 1064 | 1108 | 3.66937856064 |
| NM_199359 | TPD52L2 | 1011 | 1056 | 3.6695455799  |
| NM_199359 | TPD52L2 | 1818 | 1891 | 4.25451481167 |
| NM_199359 | TPD52L2 | 122  | 300  | 5.47690723301 |
| NM_199359 | TPD52L2 | 806  | 903  | 4.99148040562 |

|           |          |      |      |                   |
|-----------|----------|------|------|-------------------|
| NM_148893 | SVIP     | 183  | 235  | 5.15341575065     |
| NM_003902 | FUBP1    | 2066 | 2138 | 6.49637376798     |
| NM_003902 | FUBP1    | 743  | 824  | 5.49637376798     |
| NM_003902 | FUBP1    | 48   | 97   | 4.49637376797     |
| NM_003902 | FUBP1    | 1038 | 1100 | 3.49637376798     |
| NM_003902 | FUBP1    | 522  | 559  | 5.49637353206     |
| NM_003902 | FUBP1    | 2179 | 2259 | 5.49637376798     |
| NM_003902 | FUBP1    | 327  | 379  | 4.49637376043     |
| NM_003902 | FUBP1    | 1288 | 1440 | 5.49637376798     |
| NM_003902 | FUBP1    | 937  | 986  | 3.49636703692     |
| NM_003902 | FUBP1    | 217  | 305  | 4.49637376797     |
| NM_003902 | FUBP1    | 1120 | 1282 | 5.81830186286     |
| NM_003902 | FUBP1    | 826  | 936  | 5.49637376798     |
| NM_003902 | FUBP1    | 1757 | 1852 | 5.08133626848     |
| NM_003901 | SGPL1    | 502  | 596  | 8.26313085104     |
| NM_003901 | SGPL1    | 2213 | 2280 | 8.85211095193     |
| NM_003901 | SGPL1    | 1089 | 1137 | 9.26714172016     |
| NM_003901 | SGPL1    | 705  | 786  | 8.18300924183     |
| NM_003901 | SGPL1    | 2740 | 2841 | 8.26714844366     |
| NM_003901 | SGPL1    | 1562 | 1643 | 9.26714845121     |
| NM_003901 | SGPL1    | 983  | 1086 | 9.26714845121     |
| NM_199352 | SLC22A25 |      | 455  | 478 12.4567731981 |
| NM_153687 | IKBIP    | 1991 | 2013 | 6.55506475091     |
| NM_153687 | IKBIP    | 1519 | 1576 | 7.22416645347     |
| NM_153687 | IKBIP    | 1263 | 1338 | 7.2239927107      |
| NM_153687 | IKBIP    | 1091 | 1149 | 7.96113205518     |
| NM_153687 | IKBIP    | 897  | 971  | 5.63920396029     |
| NM_153687 | IKBIP    | 1179 | 1254 | 6.63920396029     |
| NM_153339 | PUSL1    | 668  | 814  | 9.84444653078     |
| NM_003909 | CPNE3    | 1121 | 1160 | 6.69543691947     |
| NM_003909 | CPNE3    | 1508 | 1586 | 7.28022567009     |
| NM_003909 | CPNE3    | 487  | 551  | 5.69543691969     |
| NM_003909 | CPNE3    | 826  | 908  | 7.28039268936     |
| NM_003909 | CPNE3    | 230  | 326  | 6.69543691214     |
| NM_003909 | CPNE3    | 1254 | 1386 | 7.69543691969     |
| NM_003909 | CPNE3    | 1420 | 1482 | 7.28039941286     |
| NM_003908 | EIF2S2   | 157  | 231  | 2.46123810669     |
| NM_003908 | EIF2S2   | 1395 | 1431 | 1.72427250497     |
| NM_003908 | EIF2S2   | 422  | 525  | 2.94666493386     |
| NM_003908 | EIF2S2   | 993  | 1107 | 3.30923501324     |
| NM_003908 | EIF2S2   | 101  | 154  | 1.1393100118      |
| NM_003908 | EIF2S2   | 281  | 412  | 3.59874163044     |
| NM_003908 | EIF2S2   | 763  | 939  | 3.59874163044     |
| NM_003908 | EIF2S2   | 1192 | 1368 | 3.72427251252     |
| NM_003908 | EIF2S2   | 590  | 733  | 2.94666493386     |
| NM_001745 | CAMLG    | 708  | 743  | 5.9964005979      |
| NM_001745 | CAMLG    | 1132 | 1200 | 5.58520694848     |
| NM_001745 | CAMLG    | 937  | 1054 | 6.58538069879     |
| NM_024736 | GSDMD    | 796  | 867  | 9.57078977241     |
| NM_024736 | GSDMD    | 1217 | 1289 | 8.83382417825     |

|           |        |       |       |               |
|-----------|--------|-------|-------|---------------|
| NM_024736 | GSDMD  | 1462  | 1530  | 7.24868792721 |
| NM_024736 | GSDMD  | 301   | 379   | 7.24868792721 |
| NM_024736 | GSDMD  | 414   | 494   | 7.24886167752 |
| NM_024736 | GSDMD  | 965   | 1105  | 9.24886167753 |
| NM_024736 | GSDMD  | 494   | 567   | 8.83382417825 |
| NM_007044 | KATNA1 | 1261  | 1307  | 7.15525240265 |
| NM_024734 | CLMN   | 12186 | 12272 | 8.95475126176 |
| NM_024734 | CLMN   | 9935  | 10006 | 7.95475125421 |
| NM_024734 | CLMN   | 12370 | 12445 | 7.95475126176 |
| NM_024734 | CLMN   | 1707  | 1781  | 8.95475126176 |
| NM_024734 | CLMN   | 5862  | 5921  | 6.95457751144 |
| NM_024734 | CLMN   | 12454 | 12535 | 6.95475126176 |
| NM_024734 | CLMN   | 7710  | 7770  | 8.53971376248 |
| NM_024734 | CLMN   | 2765  | 2809  | 8.53971376248 |
| NM_024734 | CLMN   | 6077  | 6210  | 10.1246762632 |
| NM_024734 | CLMN   | 9470  | 9547  | 7.95073366159 |
| NM_024734 | CLMN   | 6611  | 6656  | 8.95475125421 |
| NM_024734 | CLMN   | 12282 | 12327 | 7.87061205238 |
| NM_024734 | CLMN   | 3824  | 3881  | 6.95475126176 |
| NM_024734 | CLMN   | 314   | 400   | 9.95475126176 |
| NM_024734 | CLMN   | 4754  | 4828  | 6.95457751144 |
| NM_024734 | CLMN   | 7040  | 7096  | 6.95073366159 |
| NM_024734 | CLMN   | 4628  | 4685  | 7.95457751144 |
| NM_024734 | CLMN   | 706   | 787   | 7.95475126154 |
| NM_024734 | CLMN   | 9823  | 9893  | 7.95073366159 |
| NM_024734 | CLMN   | 1466  | 1542  | 8.95475126176 |
| NM_024734 | CLMN   | 5971  | 6010  | 7.95073366159 |
| NM_024734 | CLMN   | 10537 | 10589 | 6.95475125421 |
| NM_024734 | CLMN   | 11896 | 11990 | 6.95475126176 |
| NM_024734 | CLMN   | 12588 | 12708 | 9.95475126176 |
| NM_024734 | CLMN   | 2810  | 2944  | 9.27667935665 |
| NM_024734 | CLMN   | 2298  | 2401  | 7.95475126176 |
| NM_024734 | CLMN   | 1814  | 2055  | 8.95475126176 |
| NM_024734 | CLMN   | 7324  | 7411  | 10.4141828804 |
| NM_024734 | CLMN   | 110   | 209   | 9.53971376248 |
| NM_024734 | CLMN   | 6275  | 6472  | 9.53971376248 |
| NM_024734 | CLMN   | 10754 | 10881 | 7.95475126176 |
| NM_024734 | CLMN   | 8147  | 8208  | 8.87061205238 |
| NM_024734 | CLMN   | 3030  | 3147  | 10.4141828804 |
| NM_024734 | CLMN   | 9744  | 9813  | 7.95475126176 |
| NM_024734 | CLMN   | 3312  | 3440  | 9.76210618382 |
| NM_024734 | CLMN   | 1383  | 1463  | 7.95475125421 |
| NM_007043 | KRR1   | 474   | 539   | 3.12638586091 |
| NM_007043 | KRR1   | 289   | 353   | 3.21051833924 |
| NM_007043 | KRR1   | 861   | 904   | 4.12638586091 |
| NM_007043 | KRR1   | 373   | 473   | 5.21052507029 |
| NM_007043 | KRR1   | 2207  | 2321  | 4.21052507029 |
| NM_024731 | KLHL36 | 1286  | 1355  | 9.21292848929 |
| NM_024731 | KLHL36 | 265   | 304   | 8.54784437936 |
| NM_018074 | CCDC94 | 421   | 508   | 5.90097094075 |

|              |          |      |      |      |               |
|--------------|----------|------|------|------|---------------|
| NM_024738    | C12orf49 |      | 1104 | 1169 | 10.2322252836 |
| NM_024738    | C12orf49 |      | 1290 | 1333 | 9.91029695282 |
| NM_024738    | C12orf49 |      | 2168 | 2241 | 9.49508593914 |
| NM_024738    | C12orf49 |      | 999  | 1058 | 8.90627958856 |
| NM_024738    | C12orf49 |      | 1969 | 2036 | 8.91029718851 |
| NM_024738    | C12orf49 |      | 190  | 236  | 7.90627958856 |
| NM_024738    | C12orf49 |      | 780  | 915  | 8.91029718119 |
| NM_024738    | C12orf49 |      | 679  | 725  | 8.91029045768 |
| NM_001130720 | AHCYL2   | 4414 | 4463 |      | 5.86816980345 |
| NM_001130725 | PSMB5    | 615  | 705  |      | 5.31027999706 |
| NM_001130725 | PSMB5    | 722  | 791  |      | 5.98835190217 |
| NM_001130725 | PSMB5    | 147  | 338  |      | 7.07581474342 |
| NM_001130725 | PSMB5    | 340  | 564  |      | 7.15827690361 |
| NM_001130725 | PSMB5    | 804  | 936  |      | 5.98835190217 |
| NM_173630    | RTTN     | 3756 | 3828 |      | 8.41374334249 |
| NM_173630    | RTTN     | 538  | 613  |      | 9.41391036175 |
| NM_173630    | RTTN     | 1082 | 1185 |      | 9.99887959353 |
| NM_173630    | RTTN     | 614  | 721  |      | 8.41391709281 |
| NM_173632    | ZNF776   | 295  | 350  |      | 7.13436613383 |
| NM_000713    | BLVRB    | 262  | 378  |      | 9.83240601727 |
| NM_000713    | BLVRB    | 210  | 251  |      | 7.24726976624 |
| NM_000713    | BLVRB    | 126  | 207  |      | 9.24744351655 |
| NM_000713    | BLVRB    | 657  | 795  |      | 9.56937161144 |
| NM_000713    | BLVRB    | 424  | 521  |      | 10.0547984386 |
| NM_012458    | TIMM13   | 353  | 381  |      | 4.20982933491 |
| NM_012458    | TIMM13   | 770  | 822  |      | 3.62871068404 |
| NM_012458    | TIMM13   | 832  | 879  |      | 4.95081252924 |
| NM_012458    | TIMM13   | 401  | 676  |      | 6.21384693508 |
| NM_012458    | TIMM13   | 701  | 770  |      | 2.62486683418 |
| NM_001018038 | VPS13A   | 6380 | 6441 |      | 6.16089972845 |
| NM_001018038 | VPS13A   | 1017 | 1084 |      | 7.15688885933 |
| NM_001018038 | VPS13A   | 7622 | 7658 |      | 7.1609064595  |
| NM_001018038 | VPS13A   | 3644 | 3674 |      | 6.15688885933 |
| NM_001018038 | VPS13A   | 881  | 974  |      | 7.74586896    |
| NM_001018038 | VPS13A   | 4506 | 4559 |      | 7.74586872431 |
| NM_001018038 | VPS13A   | 4593 | 4648 |      | 7.74586872431 |
| NM_001018038 | VPS13A   | 6116 | 6194 |      | 6.1609064595  |
| NM_001018038 | VPS13A   | 1619 | 1683 |      | 6.15688885933 |
| NM_001018038 | VPS13A   | 3444 | 3538 |      | 7.74586895268 |
| NM_001018038 | VPS13A   | 8083 | 8116 |      | 6.07676725012 |
| NM_001018038 | VPS13A   | 3322 | 3384 |      | 6.16073270919 |
| NM_001018038 | VPS13A   | 8874 | 8912 |      | 7.16073270919 |
| NM_001018038 | VPS13A   | 4730 | 4831 |      | 8.1609064595  |
| NM_001018038 | VPS13A   | 4655 | 4729 |      | 6.16090645195 |
| NM_001172702 | SLC38A6  | 378  | 467  |      | 11.71254907   |
| NM_001172702 | SLC38A6  | 1273 | 1319 |      | 10.1275798383 |
| NM_001172702 | SLC38A6  | 577  | 704  |      | 10.71254907   |
| NM_001139510 | ECHDC1   | 355  | 423  |      | 5.97024132854 |
| NM_001139510 | ECHDC1   | 1836 | 1915 |      | 4.0787471971  |
| NM_001139510 | ECHDC1   | 962  | 1008 |      | 4.15886880631 |



|              |          |      |      |                    |
|--------------|----------|------|------|--------------------|
| NM_001139510 | ECHDC1   | 665  | 739  | 4.0787471971       |
| NM_001139510 | ECHDC1   | 1083 | 1173 | 5.16288640648      |
| NM_001139510 | ECHDC1   | 1279 | 1340 | 4.16287967543      |
| NM_001139510 | ECHDC1   | 478  | 526  | 3.16271265617      |
| NM_001139510 | ECHDC1   | 846  | 901  | 4.16288640626      |
| NM_001139510 | ECHDC1   | 221  | 346  | 4.7478489072       |
| NM_001145658 | RAP1GAP  | 498  | 560  | 7.68229457913      |
| NM_001145658 | RAP1GAP  | 816  | 871  | 7.17745368762      |
| NM_001145658 | RAP1GAP  | 695  | 770  | 7.76643378851      |
| NM_001145658 | RAP1GAP  | 917  | 1007 | 7.18129753747      |
| NM_001145658 | RAP1GAP  | 2729 | 2830 | 8.50339938268      |
| NM_001145658 | RAP1GAP  | 1087 | 1173 | 7.18147105187      |
| NM_001145658 | RAP1GAP  | 197  | 254  | 7.7664337885       |
| NM_207325    | DPY19L3  | 1339 | 1411 | 8.8632945475       |
| NM_207325    | DPY19L3  | 1839 | 1876 | 8.12632871742      |
| NM_207325    | DPY19L3  | 1031 | 1099 | 8.54136645262      |
| NM_207325    | DPY19L3  | 1880 | 1924 | 7.45722724323      |
| NM_207325    | DPY19L3  | 1664 | 1741 | 7.54136645261      |
| NM_207325    | DPY19L3  | 1443 | 1547 | 8.8632945475       |
| NM_207325    | DPY19L3  | 193  | 230  | 6.54135972156      |
| NM_207325    | DPY19L3  | 2464 | 2502 | 6.53734885244      |
| NM_207325    | DPY19L3  | 5504 | 5566 | 7.54136645262      |
| NM_001135651 | EIF2AK2  | 166  | 250  | 5.44874797169      |
| NM_001135651 | EIF2AK2  | 1418 | 1471 | 4.44891499095      |
| NM_001195605 | ZNF865   | 2055 | 2084 | 10.5610168277      |
| NM_001195605 | ZNF865   | 3256 | 3330 | 11.5650344279      |
| NM_001195605 | ZNF865   | 355  | 406  | 10.5610168277      |
| NM_014652    | IP013    | 2494 | 2528 | 9.46942169296      |
| NM_014652    | IP013    | 3743 | 3811 | 7.96859167057      |
| NM_014652    | IP013    | 3438 | 3487 | 9.55338715202      |
| NM_014652    | IP013    | 849  | 912  | 7.96458080145      |
| NM_014652    | IP013    | 3198 | 3270 | 8.96859167057      |
| NM_014652    | IP013    | 1032 | 1129 | 7.96859167057      |
| NM_014652    | IP013    | 3336 | 3402 | 7.96859167057      |
| NM_014652    | IP013    | 2853 | 2966 | 9.96859840162      |
| NM_005509    | DMXL1    | 925  | 964  | 9.0263691724       |
| NM_014655    | SLC25A44 |      | 2645 | 2702 8.58691015464 |
| NM_014654    | SDC3     | 1891 | 1956 | 13.2532491382      |
| NM_014654    | SDC3     | 3983 | 4037 | 10.6642690373      |
| NM_014654    | SDC3     | 200  | 240  | 10.5841474281      |
| NM_005505    | SCARB1   | 440  | 506  | 7.14954426544      |
| NM_005505    | SCARB1   | 363  | 427  | 5.73450676616      |
| NM_005505    | SCARB1   | 108  | 213  | 6.9568991875       |
| NM_005505    | SCARB1   | 1209 | 1266 | 6.14954426544      |
| NM_005505    | SCARB1   | 292  | 362  | 5.14937051512      |
| NM_005505    | SCARB1   | 2617 | 2699 | 4.14954426543      |
| NM_005505    | SCARB1   | 1855 | 1905 | 5.14954426543      |
| NM_005505    | SCARB1   | 2084 | 2205 | 6.14954426544      |
| NM_005505    | SCARB1   | 1913 | 2081 | 7.9568991875       |
| NM_005505    | SCARB1   | 845  | 1131 | 9.10374057583      |

|           |        |      |      |               |
|-----------|--------|------|------|---------------|
| NM_005505 | SCARB1 | 1266 | 1554 | 8.05643486105 |
| NM_005505 | SCARB1 | 1560 | 1817 | 8.23700710669 |
| NM_005505 | SCARB1 | 625  | 836  | 7.60897588408 |
| NM_005505 | SCARB1 | 2394 | 2507 | 6.47147236033 |
| NM_005504 | BCAT1  | 654  | 741  | 6.17198003041 |
| NM_005507 | CFL1   | 155  | 288  | 6.23961878759 |
| NM_005507 | CFL1   | 872  | 995  | 5.90519974852 |
| NM_005507 | CFL1   | 1038 | 1214 | 6.33583410285 |
| NM_005507 | CFL1   | 288  | 702  | 6.73918979708 |
| NM_005506 | SCARB2 | 1151 | 1179 | 6.11253498077 |
| NM_005506 | SCARB2 | 4107 | 4152 | 6.69767123158 |
| NM_005506 | SCARB2 | 2241 | 2279 | 6.11253498077 |
| NM_005506 | SCARB2 | 4545 | 4683 | 6.6976712318  |
| NM_005506 | SCARB2 | 398  | 556  | 9.36063624453 |
| NM_005506 | SCARB2 | 955  | 1140 | 9.75656492086 |
| NM_005506 | SCARB2 | 1186 | 1362 | 9.92006365314 |
| NM_005506 | SCARB2 | 558  | 825  | 9.86759623325 |
| NM_005506 | SCARB2 | 4152 | 4206 | 6.11270200003 |
| NM_005506 | SCARB2 | 2988 | 3119 | 7.11270873108 |
| NM_005506 | SCARB2 | 3426 | 3477 | 7.11270873108 |
| NM_005506 | SCARB2 | 3656 | 3745 | 5.11270873108 |
| NM_005506 | SCARB2 | 841  | 950  | 8.6976712318  |
| NM_005506 | SCARB2 | 1389 | 1497 | 8.92006365314 |
| NM_005506 | SCARB2 | 1531 | 1867 | 10.1571028504 |
| NM_005506 | SCARB2 | 4224 | 4313 | 7.11270873108 |
| NM_005506 | SCARB2 | 2043 | 2194 | 9.20017157233 |
| NM_005506 | SCARB2 | 2444 | 2738 | 8.43463682597 |
| NM_005506 | SCARB2 | 1876 | 2029 | 8.81314844922 |
| NM_005506 | SCARB2 | 262  | 334  | 6.11270873108 |
| NM_005500 | SAE1   | 1926 | 2010 | 6.24338669164 |
| NM_005500 | SAE1   | 1517 | 1570 | 6.24338669164 |
| NM_005500 | SAE1   | 470  | 556  | 7.82834919236 |
| NM_005500 | SAE1   | 1040 | 1261 | 6.82834919236 |
| NM_005500 | SAE1   | 1801 | 1895 | 5.24338669163 |
| NM_005500 | SAE1   | 1674 | 1796 | 6.24338669164 |
| NM_005500 | SAE1   | 161  | 469  | 8.7669486477  |
| NM_005500 | SAE1   | 566  | 1008 | 9.49131420508 |
| NM_005502 | ABCA1  | 3345 | 3383 | 6.60433930066 |
| NM_005502 | ABCA1  | 502  | 542  | 6.60433930066 |
| NM_005502 | ABCA1  | 8173 | 8222 | 6.52421769145 |
| NM_006319 | CDIPT  | 1778 | 1852 | 7.08493266441 |
| NM_006319 | CDIPT  | 1205 | 1261 | 8.66989517268 |
| NM_006319 | CDIPT  | 1702 | 1772 | 8.89228759402 |
| NM_006319 | CDIPT  | 715  | 761  | 7.66989517246 |
| NM_006319 | CDIPT  | 1853 | 1897 | 6.00079346258 |
| NM_006319 | CDIPT  | 762  | 1000 | 10.8398201741 |
| NM_006319 | CDIPT  | 1481 | 1680 | 9.40686076685 |
| NM_006319 | CDIPT  | 445  | 710  | 10.4772500947 |
| NM_003769 | SRSF9  | 740  | 775  | 2.74441727171 |
| NM_003769 | SRSF9  | 879  | 942  | 3.8285564811  |

|           |        |      |      |               |
|-----------|--------|------|------|---------------|
| NM_003769 | SRSF9  | 128  | 175  | 2.82855648087 |
| NM_003769 | SRSF9  | 1097 | 1130 | 2.82453888092 |
| NM_003769 | SRSF9  | 182  | 304  | 5.99848148254 |
| NM_003769 | SRSF9  | 805  | 878  | 4.8285564811  |
| NM_003769 | SRSF9  | 344  | 660  | 7.07648399454 |
| NM_003768 | PEA15  | 716  | 782  | 7.80842137673 |
| NM_003768 | PEA15  | 410  | 498  | 7.22345887601 |
| NM_003768 | PEA15  | 645  | 705  | 7.13931966663 |
| NM_003768 | PEA15  | 108  | 170  | 7.21944127584 |
| NM_003768 | PEA15  | 967  | 1021 | 7.21944127584 |
| NM_003768 | PEA15  | 1214 | 1265 | 6.21944127584 |
| NM_003768 | PEA15  | 2304 | 2447 | 7.22345887601 |
| NM_006310 | NPEPPS | 709  | 799  | 4.04723923915 |
| NM_006310 | NPEPPS | 1682 | 1768 | 4.63621910413 |
| NM_006310 | NPEPPS | 1791 | 1835 | 5.05125660341 |
| NM_006310 | NPEPPS | 3580 | 3610 | 2.96711762994 |
| NM_006310 | NPEPPS | 3007 | 3073 | 3.04723923915 |
| NM_006310 | NPEPPS | 483  | 522  | 5.0512568391  |
| NM_006310 | NPEPPS | 3093 | 3133 | 3.05108308901 |
| NM_006310 | NPEPPS | 2027 | 2211 | 6.37318493421 |
| NM_006310 | NPEPPS | 2375 | 2496 | 4.63621934005 |
| NM_006310 | NPEPPS | 1950 | 2021 | 4.05125683933 |
| NM_006310 | NPEPPS | 824  | 932  | 4.63621934005 |
| NM_006310 | NPEPPS | 3786 | 3889 | 3.05125683933 |
| NM_006310 | NPEPPS | 1167 | 1494 | 7.22118184077 |
| NM_006310 | NPEPPS | 242  | 311  | 4.05125683933 |
| NM_006310 | NPEPPS | 1558 | 1661 | 3.05125683933 |
| NM_006313 | USP15  | 1593 | 1676 | 7.58514751706 |
| NM_006313 | USP15  | 247  | 288  | 5.99617414722 |
| NM_006313 | USP15  | 1826 | 1896 | 7.58515424811 |
| NM_006313 | USP15  | 2324 | 2439 | 7.58515424811 |
| NM_006313 | USP15  | 850  | 917  | 5.91605253801 |
| NM_006313 | USP15  | 1071 | 1132 | 7.58113664794 |
| NM_006313 | USP15  | 2023 | 2094 | 7.5851540122  |
| NM_139201 | GIT2   | 342  | 414  | 6.59738658111 |
| NM_006315 | PCGF3  | 1313 | 1345 | 4.32298781851 |
| NM_006315 | PCGF3  | 2949 | 2991 | 5.23885534018 |
| NM_006315 | PCGF3  | 1988 | 2030 | 4.23885534018 |
| NM_006315 | PCGF3  | 2804 | 2862 | 4.32299454201 |
| NM_006315 | PCGF3  | 1721 | 1772 | 4.23885534018 |
| NM_006315 | PCGF3  | 2575 | 2622 | 5.32298781851 |
| NM_006315 | PCGF3  | 4483 | 4546 | 4.31897694939 |
| NM_006315 | PCGF3  | 1481 | 1555 | 4.23885534018 |
| NM_006315 | PCGF3  | 3495 | 3532 | 6.32282079924 |
| NM_006315 | PCGF3  | 1865 | 1897 | 4.23885534018 |
| NM_006315 | PCGF3  | 1081 | 1118 | 5.31897694939 |
| NM_006315 | PCGF3  | 4867 | 4999 | 7.13034947162 |
| NM_006315 | PCGF3  | 3364 | 3431 | 4.31897694939 |
| NM_006315 | PCGF3  | 1171 | 1224 | 4.31897694939 |
| NM_006315 | PCGF3  | 932  | 1052 | 6.32299454956 |

|           |           |      |      |                 |               |
|-----------|-----------|------|------|-----------------|---------------|
| NM_139207 | NAP1L1    | 1511 | 1546 | 0.851273561084  |               |
| NM_139207 | NAP1L1    | 687  | 739  | 0.851447311402  |               |
| NM_139207 | NAP1L1    | 3042 | 3078 | -0.152570288771 |               |
| NM_139207 | NAP1L1    | 615  | 687  | 1.8514473114    |               |
| NM_139207 | NAP1L1    | 1576 | 1651 | 0.85144731118   |               |
| NM_139207 | NAP1L1    | 378  | 557  | 3.55188702954   |               |
| NM_139207 | NAP1L1    | 2685 | 2750 | -0.148552924517 |               |
| NM_139207 | NAP1L1    | 286  | 354  | -0.148552696147 |               |
| NM_139207 | NAP1L1    | 761  | 1508 | 5.91753650186   |               |
| NM_003765 | STX10     | 932  | 981  | 5.24854460018   |               |
| NM_003765 | STX10     | 671  | 735  | 5.24853786935   |               |
| NM_018555 | ZNF331    | 2161 | 2200 | 6.00710977207   |               |
| NM_018555 | ZNF331    | 4117 | 4163 | 7.01112064119   |               |
| NM_018555 | ZNF331    | 836  | 880  | 7.59608986542   |               |
| NM_018555 | ZNF331    | 3829 | 3863 | 6.00710977207   |               |
| NM_152755 | CNPY4     | 685  | 719  | 7.08502749663   |               |
| NM_152755 | CNPY4     | 364  | 425  | 8.67383384721   |               |
| NM_152755 | CNPY4     | 151  | 254  | 9.0890450968    |               |
| NM_015469 | NIPSNAP3A |      | 182  | 240             | 7.9990924677  |
| NM_015469 | NIPSNAP3A |      | 266  | 364             | 8.66819417026 |
| NM_015469 | NIPSNAP3A |      | 758  | 847             | 8.08323144117 |
| NM_032338 | LLPH      | 473  | 527  | 4.48022679879   |               |
| NM_032338 | LLPH      | 158  | 210  | 3.39608758963   |               |
| NM_032338 | LLPH      | 896  | 955  | 3.39608758963   |               |
| NM_032338 | LLPH      | 409  | 460  | 4.47620919884   |               |
| NM_052855 | ANKRD40   | 358  | 416  | 7.01789563941   |               |
| NM_052855 | ANKRD40   | 2006 | 2062 | 8.02191323958   |               |
| NM_052855 | ANKRD40   | 1171 | 1269 | 8.02191323958   |               |
| NM_052855 | ANKRD40   | 804  | 868  | 7.02191323203   |               |
| NM_052855 | ANKRD40   | 537  | 628  | 6.02191323958   |               |
| NM_052855 | ANKRD40   | 1820 | 1911 | 8.02191323958   |               |
| NM_052853 | ADCK2     | 536  | 583  | 8.22055452343   |               |
| NM_052853 | ADCK2     | 435  | 522  | 8.30469373282   |               |
| NM_052853 | ADCK2     | 1201 | 1319 | 10.6266218277   |               |
| NM_052853 | ADCK2     | 1413 | 1495 | 8.30468700176   |               |
| NM_052853 | ADCK2     | 1665 | 1762 | 9.30469372527   |               |
| NM_152313 | SLC36A4   | 687  | 715  | 7.35179371833   |               |
| NM_152313 | SLC36A4   | 965  | 1000 | 8.35179371833   |               |
| NM_152313 | SLC36A4   | 345  | 403  | 9.75786101505   |               |
| NM_152313 | SLC36A4   | 613  | 668  | 9.35179371833   |               |
| NM_152313 | SLC36A4   | 435  | 481  | 9.43592619666   |               |
| NM_152313 | SLC36A4   | 814  | 887  | 10.0208954284   |               |
| NM_152313 | SLC36A4   | 5829 | 5895 | 7.35179371833   |               |
| NM_152313 | SLC36A4   | 487  | 564  | 9.02089519252   |               |
| NM_152313 | SLC36A4   | 185  | 263  | 9.4357591774    |               |
| NM_152313 | SLC36A4   | 1293 | 1359 | 8.4357591774    |               |
| NM_152313 | SLC36A4   | 1475 | 1567 | 9.43593292749   |               |
| NM_152312 | GYLTL1B   | 1407 | 1474 | 10.0932905966   |               |
| NM_152312 | GYLTL1B   | 153  | 223  | 9.50832136481   |               |
| NM_152312 | GYLTL1B   | 1486 | 1585 | 9.50832809564   |               |

|              |          |      |      |               |               |
|--------------|----------|------|------|---------------|---------------|
| NM_152312    | GYLTL1B  | 1966 | 2039 | 10.0932905966 |               |
| NM_152312    | GYLTL1B  | 1653 | 1723 | 10.0932905966 |               |
| NM_152312    | GYLTL1B  | 973  | 1093 | 10.8302561908 |               |
| NM_152312    | GYLTL1B  | 702  | 841  | 11.0932905966 |               |
| NM_152312    | GYLTL1B  | 1128 | 1272 | 10.5083280959 |               |
| NM_006454    | MXD4     | 2652 | 2704 | 4.55202155311 |               |
| NM_006454    | MXD4     | 1906 | 1952 | 3.55202155311 |               |
| NM_006454    | MXD4     | 3394 | 3465 | 4.55202804824 |               |
| NM_006454    | MXD4     | 2316 | 2401 | 5.55202828416 |               |
| NM_006454    | MXD4     | 405  | 458  | 4.46788907478 |               |
| NM_006454    | MXD4     | 912  | 949  | 5.55185453384 |               |
| NM_006454    | MXD4     | 2243 | 2295 | 3.55202155311 |               |
| NM_006454    | MXD4     | 1778 | 1886 | 5.55202828416 |               |
| NM_006454    | MXD4     | 466  | 598  | 5.55202828416 |               |
| NM_006454    | MXD4     | 3101 | 3188 | 3.55202827661 |               |
| NM_032333    | C10orf58 |      | 544  | 683           | 7.93800105959 |
| NM_032333    | C10orf58 |      | 1520 | 1559          | 5.61607295715 |
| NM_032333    | C10orf58 |      | 1595 | 1662          | 5.6160729647  |
| NM_032333    | C10orf58 |      | 260  | 542           | 8.13963492076 |
| NM_032333    | C10orf58 |      | 1436 | 1500          | 6.6160729647  |
| NM_032333    | C10orf58 |      | 710  | 1007          | 8.37096046686 |
| NM_032333    | C10orf58 |      | 1019 | 1133          | 4.6160729647  |
| NM_032333    | C10orf58 |      | 1334 | 1432          | 6.20103546542 |
| NM_152641    | ARID2    | 1589 | 1662 | 8.86943480757 |               |
| NM_152641    | ARID2    | 2865 | 2931 | 7.28046143773 |               |
| NM_032335    | PHF6     | 267  | 313  | 6.72611849138 |               |
| NM_052859    | RFT1     | 1450 | 1521 | 8.76682589511 |               |
| NM_052859    | RFT1     | 835  | 909  | 10.0887542259 |               |
| NM_052859    | RFT1     | 331  | 390  | 7.76665238071 |               |
| NM_052859    | RFT1     | 958  | 991  | 7.76280853086 |               |
| NM_052859    | RFT1     | 185  | 233  | 8.76280853086 |               |
| NM_052859    | RFT1     | 1305 | 1344 | 9.26764942237 |               |
| NM_052859    | RFT1     | 680  | 720  | 7.76682612348 |               |
| NM_052859    | RFT1     | 404  | 612  | 11.2262577497 |               |
| NM_052859    | RFT1     | 1089 | 1205 | 10.5741810531 |               |
| NM_052859    | RFT1     | 612  | 678  | 9.35178863175 |               |
| NM_032620    | GTPBP3   | 543  | 586  | 7.37808756875 |               |
| NM_032620    | GTPBP3   | 398  | 440  | 8.29796595954 |               |
| NM_032620    | GTPBP3   | 1125 | 1171 | 8.37808756875 |               |
| NM_032620    | GTPBP3   | 2474 | 2547 | 8.96706766965 |               |
| NM_032620    | GTPBP3   | 683  | 767  | 8.38210493301 |               |
| NM_032620    | GTPBP3   | 2204 | 2258 | 7.37808756875 |               |
| NM_007207    | DUSP10   | 2610 | 2656 | 9.05687718729 |               |
| NM_007207    | DUSP10   | 2245 | 2289 | 8.1369987965  |               |
| NM_001134338 | RNF24    | 640  | 692  | 10.0881063741 |               |
| NM_002150    | HPD      | 225  | 272  | 4.38849107164 |               |
| NM_002150    | HPD      | 419  | 498  | 3.80754616354 |               |
| NM_002150    | HPD      | 951  | 1011 | 2.80352857092 |               |
| NM_002150    | HPD      | 293  | 413  | 4.39250843589 |               |
| NM_001144831 | PHB2     | 414  | 520  | 5.81211709474 |               |

|              |          |      |      |               |               |
|--------------|----------|------|------|---------------|---------------|
| NM_001144831 | PHB2     | 1209 | 1296 | 5.39707959546 |               |
| NM_001144831 | PHB2     | 810  | 875  | 2.80809949456 |               |
| NM_001144831 | PHB2     | 349  | 394  | 3.81211709474 |               |
| NM_001144831 | PHB2     | 714  | 810  | 4.81211709474 |               |
| NM_001144831 | PHB2     | 1093 | 1170 | 2.81211036368 |               |
| NM_001144831 | PHB2     | 567  | 654  | 6.13404518962 |               |
| NM_001144831 | PHB2     | 307  | 340  | 4.3970728644  |               |
| NM_001144831 | PHB2     | 1307 | 1379 | 4.39707959546 |               |
| NM_001144831 | PHB2     | 167  | 252  | 4.39707959546 |               |
| NM_001144831 | PHB2     | 915  | 1073 | 6.51255681288 |               |
| NM_001079684 | KIAA1191 |      | 2560 | 2614          | 5.0094174394  |
| NM_001079684 | KIAA1191 |      | 200  | 239           | 6.00958445866 |
| NM_001079684 | KIAA1191 |      | 1909 | 1948          | 5.00557358954 |
| NM_001127898 | CLCN5    | 316  | 383  | 7.82000261995 |               |
| NM_001127898 | CLCN5    | 1057 | 1110 | 10.1419374459 |               |
| NM_001127898 | CLCN5    | 1232 | 1269 | 8.81983560069 |               |
| NM_001127898 | CLCN5    | 8913 | 9014 | 7.82000911509 |               |
| NM_001127898 | CLCN5    | 733  | 788  | 10.1419374457 |               |
| NM_001127898 | CLCN5    | 2854 | 2904 | 9.73587014162 |               |
| NM_001127898 | CLCN5    | 2474 | 2510 | 8.81983560069 |               |
| NM_001127898 | CLCN5    | 990  | 1049 | 8.82000934346 |               |
| NM_001127898 | CLCN5    | 1732 | 1832 | 10.6273642731 |               |
| NM_001127898 | CLCN5    | 2940 | 3022 | 8.81599175083 |               |
| NM_001127898 | CLCN5    | 4237 | 4316 | 10.1379198457 |               |
| NM_001127898 | CLCN5    | 635  | 686  | 8.81983560069 |               |
| NM_001127898 | CLCN5    | 1866 | 1950 | 8.82000911509 |               |
| NM_001127898 | CLCN5    | 1154 | 1216 | 8.81599175083 |               |
| NM_001127898 | CLCN5    | 1307 | 1369 | 9.82000934346 |               |
| NM_001127898 | CLCN5    | 4667 | 4712 | 8.81983560069 |               |
| NM_001127898 | CLCN5    | 2318 | 2442 | 10.820009351  |               |
| NM_001127898 | CLCN5    | 1954 | 2019 | 9.40479810141 |               |
| NM_001127898 | CLCN5    | 547  | 585  | 7.73587014162 |               |
| NM_001127898 | CLCN5    | 1610 | 1703 | 8.82000935101 |               |
| NM_001127898 | CLCN5    | 795  | 932  | 11.2794409696 |               |
| NM_001127898 | CLCN5    | 2598 | 2852 | 10.6273642731 |               |
| NM_001127898 | CLCN5    | 2096 | 2255 | 9.82000935101 |               |
| NM_001127898 | CLCN5    | 8206 | 8270 | 7.82000261995 |               |
| NM_015291    | DNAJC16  | 1808 | 1845 | 8.3630638836  |               |
| NM_015291    | DNAJC16  | 531  | 618  | 9.95203725344 |               |
| NM_015291    | DNAJC16  | 686  | 760  | 9.36708148355 |               |
| NM_015291    | DNAJC16  | 970  | 1013 | 9.95204398449 |               |
| NM_015291    | DNAJC16  | 1308 | 1357 | 9.95203725344 |               |
| NM_015291    | DNAJC16  | 2309 | 2360 | 9.95187023418 |               |
| NM_015291    | DNAJC16  | 2482 | 2573 | 8.36708148377 |               |
| NM_015291    | DNAJC16  | 425  | 474  | 8.36708124785 |               |
| NM_015291    | DNAJC16  | 4720 | 4776 | 9.36708147622 |               |
| NM_015291    | DNAJC16  | 1555 | 1717 | 10.9520439845 |               |
| NM_001048201 | UHRF1    | 3426 | 3479 | 6.38114234418 |               |
| NM_001048201 | UHRF1    | 410  | 461  | 6.37729849432 |               |
| NM_001048201 | UHRF1    | 2767 | 2849 | 8.96627859521 |               |

|              |         |      |      |               |
|--------------|---------|------|------|---------------|
| NM_001048201 | UHRF1   | 797  | 852  | 7.38130936344 |
| NM_001048201 | UHRF1   | 2637 | 2730 | 8.70324418938 |
| NM_001048201 | UHRF1   | 582  | 690  | 8.96627859521 |
| NM_001048201 | UHRF1   | 2288 | 2345 | 6.29717688511 |
| NM_001048201 | UHRF1   | 1350 | 1379 | 6.29717688511 |
| NM_001048201 | UHRF1   | 2894 | 2937 | 7.37729849432 |
| NM_001048201 | UHRF1   | 2518 | 2627 | 7.96627859521 |
| NM_001048201 | UHRF1   | 1946 | 2055 | 6.38131609449 |
| NM_001048201 | UHRF1   | 3863 | 3959 | 6.38131609449 |
| NM_001048201 | UHRF1   | 1633 | 1775 | 8.38131609449 |
| NM_001048201 | UHRF1   | 2397 | 2509 | 8.70324418938 |
| NM_001048201 | UHRF1   | 476  | 558  | 7.38131609449 |
| NM_001048201 | UHRF1   | 1229 | 1315 | 7.38131609449 |
| NM_001048201 | UHRF1   | 931  | 1098 | 9.55124109594 |
| NM_015295    | SMCHD1  | 6932 | 6971 | 6.61834144337 |
| NM_015295    | SMCHD1  | 3881 | 3981 | 6.03337894998 |
| NM_015296    | DOCK9   | 3618 | 3665 | 13.6967297444 |
| NM_015296    | DOCK9   | 5307 | 5357 | 12.0316456345 |
| NM_015296    | DOCK9   | 3200 | 3267 | 12.1157846079 |
| NM_015296    | DOCK9   | 732  | 845  | 12.1117672437 |
| NM_015296    | DOCK9   | 4015 | 4084 | 12.1157848363 |
| NM_015525    | IBTK    | 1496 | 1576 | 7.53209861476 |
| NM_015525    | IBTK    | 5181 | 5246 | 5.12603131803 |
| NM_015525    | IBTK    | 4418 | 4471 | 6.2101705272  |
| NM_015525    | IBTK    | 1118 | 1167 | 6.20615292725 |
| NM_015525    | IBTK    | 1171 | 1280 | 7.53209862231 |
| NM_015525    | IBTK    | 271  | 351  | 7.2099967771  |
| NM_015525    | IBTK    | 5496 | 5552 | 6.20615292725 |
| NM_015525    | IBTK    | 2877 | 2947 | 7.79513279222 |
| NM_015525    | IBTK    | 1991 | 2054 | 6.79513279222 |
| NM_015299    | KHNYN   | 4311 | 4350 | 5.42277045694 |
| NM_015299    | KHNYN   | 4398 | 4481 | 7.00773295766 |
| NM_015299    | KHNYN   | 5926 | 5990 | 5.4266143068  |
| NM_015528    | RNF167  | 1267 | 1327 | 6.46004101047 |
| NM_015528    | RNF167  | 508  | 599  | 7.04500351874 |
| NM_015528    | RNF167  | 258  | 296  | 7.4600407821  |
| NM_015528    | RNF167  | 407  | 458  | 5.45602341784 |
| NM_015528    | RNF167  | 841  | 896  | 6.45602341784 |
| NM_015528    | RNF167  | 313  | 385  | 5.45602341784 |
| NM_015528    | RNF167  | 39   | 113  | 5.4598672677  |
| NM_015528    | RNF167  | 1580 | 1707 | 7.04500351874 |
| NM_015528    | RNF167  | 696  | 830  | 9.26739594007 |
| NM_015528    | RNF167  | 136  | 206  | 7.04500351874 |
| NM_015528    | RNF167  | 1447 | 1580 | 8.04500351874 |
| NM_015528    | RNF167  | 1044 | 1170 | 7.7819691129  |
| NM_002419    | MAP3K11 | 1247 | 1314 | 7.07752752022 |
| NM_002419    | MAP3K11 | 2245 | 2305 | 7.07752752022 |
| NM_002419    | MAP3K11 | 1077 | 1116 | 6.07350992005 |
| NM_002419    | MAP3K11 | 2562 | 2623 | 8.07752752022 |
| NM_002419    | MAP3K11 | 1375 | 1465 | 6.07752752022 |

|              |         |      |      |                |
|--------------|---------|------|------|----------------|
| NM_002419    | MAP3K11 | 2788 | 2845 | 6.07350992005  |
| NM_002419    | MAP3K11 | 1673 | 1741 | 6.99338831084  |
| NM_002419    | MAP3K11 | 627  | 681  | 6.07350992005  |
| NM_020992    | PDLIM1  | 791  | 830  | 4.66025964686  |
| NM_020992    | PDLIM1  | 534  | 593  | 5.2452223835   |
| NM_020992    | PDLIM1  | 1228 | 1264 | 4.5761206734   |
| NM_020992    | PDLIM1  | 1264 | 1425 | 7.83018488423  |
| NM_020992    | PDLIM1  | 1436 | 1567 | 5.98218797767  |
| NM_020992    | PDLIM1  | 664  | 761  | 6.46761480484  |
| NM_020992    | PDLIM1  | 278  | 524  | 5.98218797767  |
| NM_020992    | PDLIM1  | 935  | 1175 | 7.36069960092  |
| NM_002412    | MGMT    | 122  | 159  | 7.41281585485  |
| NM_002410    | MGAT5   | 1151 | 1219 | 8.04329539866  |
| NM_002414    | CD99    | 174  | 254  | 5.19976783253  |
| NM_002414    | CD99    | 310  | 402  | 5.19976783253  |
| NM_002414    | CD99    | 868  | 944  | 4.19575023236  |
| NM_002414    | CD99    | 427  | 480  | 4.11562862315  |
| NM_002414    | CD99    | 980  | 1043 | 4.78473009734  |
| NM_002415    | MIF     | 12   | 41   | 0.643644948105 |
| NM_002415    | MIF     | 44   | 112  | 4.34425841656  |
| NM_002415    | MIF     | 361  | 458  | 3.45117362048  |
| NM_002415    | MIF     | 112  | 324  | 3.64381869842  |
| NM_177524    | MEST    | 1500 | 1563 | 9.5453869709   |
| NM_177524    | MEST    | 1928 | 1974 | 6.54521322058  |
| NM_177524    | MEST    | 623  | 670  | 8.86731506578  |
| NM_177524    | MEST    | 170  | 218  | 8.13034274056  |
| NM_177524    | MEST    | 2211 | 2277 | 7.54538673498  |
| NM_177524    | MEST    | 1173 | 1254 | 9.35274189295  |
| NM_177524    | MEST    | 1024 | 1125 | 9.35274189295  |
| NM_177524    | MEST    | 336  | 483  | 10.6328498121  |
| NM_177524    | MEST    | 1413 | 1488 | 9.13034947162  |
| NM_177524    | MEST    | 2104 | 2174 | 7.54538696335  |
| NM_177524    | MEST    | 862  | 1021 | 9.13034947162  |
| NM_177524    | MEST    | 507  | 608  | 7.5453869709   |
| NM_177524    | MEST    | 1304 | 1399 | 6.54538697089  |
| NM_177524    | MEST    | 675  | 858  | 11.0048185895  |
| NM_170754    | TENC1   | 710  | 761  | 10.3221007875  |
| NM_170754    | TENC1   | 2821 | 2870 | 9.65317282773  |
| NM_170754    | TENC1   | 1333 | 1485 | 10.3222745378  |
| NM_170754    | TENC1   | 855  | 924  | 9.73730530606  |
| NM_001017980 | VMA21   | 863  | 930  | 10.0311657155  |
| NM_001017980 | VMA21   | 4487 | 4553 | 10.0313394582  |
| NM_001017980 | VMA21   | 2185 | 2234 | 9.94720025641  |
| NM_001017980 | VMA21   | 669  | 747  | 10.0313327347  |
| NM_138348    | FAM105B | 4289 | 4358 | 6.87160139914  |
| NM_138348    | FAM105B | 3831 | 3890 | 5.86758403489  |
| NM_138348    | FAM105B | 360  | 428  | 7.45656389986  |
| NM_138348    | FAM105B | 734  | 803  | 6.86758403489  |
| NM_138348    | FAM105B | 7688 | 7753 | 5.86758403489  |
| NM_138348    | FAM105B | 4187 | 4250 | 5.87160162751  |



|              |          |      |       |               |               |
|--------------|----------|------|-------|---------------|---------------|
| NM_138348    | FAM105B  | 6272 | 6377  | 6.87160163506 |               |
| NM_138349    | TP53I13  | 681  | 722   | 8.60754632412 |               |
| NM_138349    | TP53I13  | 336  | 402   | 9.69168553351 |               |
| NM_138349    | TP53I13  | 1403 | 1468  | 8.69167880245 |               |
| NM_138349    | TP53I13  | 820  | 853   | 7.60754632412 |               |
| NM_138349    | TP53I13  | 417  | 525   | 7.69168553351 |               |
| NM_138349    | TP53I13  | 957  | 1066  | 10.0136136284 |               |
| NM_020909    | EPB41L5  | 681  | 745   | 6.42245082841 |               |
| NM_138340    | ABHD3    | 1713 | 1761  | 8.26583251458 |               |
| NM_138340    | ABHD3    | 1896 | 1993  | 8.26583924563 |               |
| NM_138340    | ABHD3    | 1100 | 1189  | 10.2658392456 |               |
| NM_138340    | ABHD3    | 127  | 202   | 8.58776734052 |               |
| NM_138340    | ABHD3    | 1456 | 1581  | 7.26583924563 |               |
| NM_138340    | ABHD3    | 560  | 789   | 10.9662789638 |               |
| NM_138340    | ABHD3    | 793  | 987   | 10.5877673405 |               |
| NM_138340    | ABHD3    | 239  | 557   | 10.9096954354 |               |
| NM_138340    | ABHD3    | 1204 | 1450  | 10.8508017464 |               |
| NM_138346    | KIAA2013 |      | 1100  | 1179          | 7.29961162213 |
| NM_138346    | KIAA2013 |      | 1020  | 1061          | 6.71464239035 |
| NM_138346    | KIAA2013 |      | 2018  | 2117          | 6.7146491214  |
| NM_138346    | KIAA2013 |      | 1836  | 1905          | 6.7146491214  |
| NM_138346    | KIAA2013 |      | 1946  | 1989          | 5.71063152123 |
| NM_138346    | KIAA2013 |      | 2399  | 2475          | 7.29961138621 |
| NM_138346    | KIAA2013 |      | 2226  | 2300          | 5.71464239035 |
| NM_138346    | KIAA2013 |      | 1442  | 1491          | 8.03657721629 |
| NM_138346    | KIAA2013 |      | 1359  | 1400          | 5.71063152123 |
| NM_138346    | KIAA2013 |      | 1190  | 1328          | 9.03657721629 |
| NM_138346    | KIAA2013 |      | 473   | 612           | 7.7146491214  |
| NM_138346    | KIAA2013 |      | 2485  | 2560          | 8.29961162213 |
| NM_001268    | RCBTB2   | 351  | 383   | 11.333612261  |               |
| NM_001009899 | KIAA2018 |      | 3573  | 3623          | 8.62465055316 |
| NM_001009899 | KIAA2018 |      | 9182  | 9215          | 8.62849440302 |
| NM_001009899 | KIAA2018 |      | 12638 | 12698         | 8.62849440302 |
| NM_001009899 | KIAA2018 |      | 8687  | 8742          | 9.62866815333 |
| NM_001242911 | ZFAND6   | 1423 | 1468  | 3.6384105254  |               |
| NM_001242911 | ZFAND6   | 691  | 763   | 5.64242812557 |               |
| NM_001242911 | ZFAND6   | 802  | 843   | 3.55828891618 |               |
| NM_001242911 | ZFAND6   | 466  | 611   | 6.44978304763 |               |
| NM_001242911 | ZFAND6   | 985  | 1082  | 5.64242812557 |               |
| NM_001261    | CDK9     | 889  | 963   | 6.84824956955 |               |
| NM_001009894 | C12orf29 |      | 1074  | 1127          | 7.50523732396 |
| NM_001009894 | C12orf29 |      | 597   | 661           | 8.50523732396 |
| NM_001009894 | C12orf29 |      | 979   | 1040          | 9.0942106938  |
| NM_025161    | C17orf70 |      | 2915  | 3008          | 9.10808453044 |
| NM_025161    | C17orf70 |      | 1254  | 1321          | 10.1119283803 |
| NM_021158    | TRIB3    | 228  | 261   | 5.09357184454 |               |
| NM_021158    | TRIB3    | 1256 | 1340  | 6.76267355464 |               |
| NM_021158    | TRIB3    | 2095 | 2143  | 6.17369345375 |               |
| NM_021158    | TRIB3    | 1843 | 1914  | 6.17770432287 |               |
| NM_021158    | TRIB3    | 261  | 294   | 5.09357184454 |               |

|              |         |      |      |               |
|--------------|---------|------|------|---------------|
| NM_021158    | TRIB3   | 482  | 533  | 5.17771105392 |
| NM_021158    | TRIB3   | 955  | 1001 | 5.17771104637 |
| NM_021158    | TRIB3   | 893  | 952  | 5.1775373036  |
| NM_021158    | TRIB3   | 1685 | 1769 | 7.49963914881 |
| NM_021158    | TRIB3   | 1015 | 1143 | 8.17771105392 |
| NM_021158    | TRIB3   | 551  | 730  | 6.76267355464 |
| NM_021158    | TRIB3   | 356  | 417  | 6.17771104637 |
| NM_021158    | TRIB3   | 1143 | 1254 | 5.17771105392 |
| NM_021158    | TRIB3   | 1512 | 1589 | 6.17771105392 |
| NM_021158    | TRIB3   | 1368 | 1470 | 6.76267331872 |
| NM_021151    | CROT    | 1724 | 1766 | 8.12032661693 |
| NM_021151    | CROT    | 1502 | 1566 | 8.12032661693 |
| NM_021151    | CROT    | 812  | 855  | 8.70930671027 |
| NM_021151    | CROT    | 2377 | 2480 | 9.12434421709 |
| NM_021151    | CROT    | 744  | 810  | 9.44627207607 |
| NM_021156    | TMX4    | 1705 | 1749 | 4.88820950715 |
| NM_021156    | TMX4    | 2051 | 2104 | 4.89222037627 |
| NM_021156    | TMX4    | 369  | 429  | 4.89222687141 |
| NM_021156    | TMX4    | 1374 | 1442 | 6.47718960805 |
| NM_021156    | TMX4    | 1764 | 1844 | 5.8922271071  |
| NM_021156    | TMX4    | 2275 | 2361 | 5.89222710732 |
| NM_021156    | TMX4    | 724  | 859  | 7.89222710733 |
| NM_021156    | TMX4    | 473  | 712  | 9.59266682547 |
| NM_001142296 | SPG20   | 1887 | 1955 | 5.61942531686 |
| NM_001142296 | SPG20   | 1210 | 1278 | 6.62344290949 |
| NM_001142296 | SPG20   | 1347 | 1466 | 5.62344290949 |
| NM_001142298 | SQSTM1  | 2233 | 2317 | 3.94241008825 |
| NM_001142298 | SQSTM1  | 2807 | 2896 | 6.74976501031 |
| NM_001142298 | SQSTM1  | 306  | 450  | 7.74976501031 |
| NM_001142298 | SQSTM1  | 466  | 731  | 8.84930068386 |
| NM_001142298 | SQSTM1  | 1737 | 2136 | 10.2822600911 |
| NM_001142298 | SQSTM1  | 2686 | 2748 | 3.94223633793 |
| NM_001142298 | SQSTM1  | 2156 | 2229 | 3.94241008825 |
| NM_001142298 | SQSTM1  | 2436 | 2501 | 5.52737258897 |
| NM_001142298 | SQSTM1  | 766  | 1732 | 11.1712287787 |
| NM_001142298 | SQSTM1  | 2504 | 2685 | 6.52737258897 |
| NM_012142    | CCNDBP1 | 1320 | 1418 | 8.10969758416 |
| NM_012142    | CCNDBP1 | 812  | 867  | 6.78776275822 |
| NM_134270    | SMTN    | 2233 | 2286 | 7.91205270964 |
| NM_134270    | SMTN    | 481  | 562  | 8.49701521036 |
| NM_134270    | SMTN    | 2299 | 2358 | 6.90803510947 |
| NM_134270    | SMTN    | 3107 | 3156 | 6.82791350026 |
| NM_134270    | SMTN    | 582  | 636  | 6.91205270209 |
| NM_134270    | SMTN    | 264  | 321  | 6.82791350026 |
| NM_134270    | SMTN    | 1912 | 1955 | 6.90803510947 |
| NM_134270    | SMTN    | 1609 | 1679 | 7.91205270964 |
| NM_134270    | SMTN    | 2949 | 3020 | 6.91205270964 |
| NM_134270    | SMTN    | 2767 | 2873 | 9.23398080453 |
| NM_134270    | SMTN    | 1200 | 1330 | 10.3714843283 |
| NM_134270    | SMTN    | 1958 | 2125 | 8.91205270964 |

|              |          |      |      |               |               |
|--------------|----------|------|------|---------------|---------------|
| NM_134270    | SMTN     | 1087 | 1185 | 8.49701521036 |               |
| NM_134270    | SMTN     | 101  | 260  | 8.49701521036 |               |
| NM_134270    | SMTN     | 2877 | 2945 | 8.49701521036 |               |
| NM_134270    | SMTN     | 2648 | 2746 | 8.49701521036 |               |
| NM_001024847 | TGFBR2   | 4514 | 4555 | 3.93988288969 |               |
| NM_001024847 | TGFBR2   | 1792 | 1824 | 5.4447237812  |               |
| NM_001024847 | TGFBR2   | 1976 | 2034 | 4.94389375881 |               |
| NM_001024847 | TGFBR2   | 834  | 899  | 5.52886299058 |               |
| NM_001024847 | TGFBR2   | 1024 | 1207 | 7.11382549131 |               |
| NM_001024847 | TGFBR2   | 702  | 805  | 6.52886299059 |               |
| NM_001024847 | TGFBR2   | 1235 | 1290 | 5.52868924027 |               |
| NM_001024847 | TGFBR2   | 1617 | 1737 | 7.11382549131 |               |
| NM_001024847 | TGFBR2   | 2117 | 2188 | 5.52886299058 |               |
| NM_001199    | BMP1     | 1775 | 1828 | 9.58391763602 |               |
| NM_001199    | BMP1     | 2142 | 2207 | 10.1688801367 |               |
| NM_001199    | BMP1     | 1268 | 1317 | 10.1688801367 |               |
| NM_001199    | BMP1     | 736  | 791  | 8.49978515769 |               |
| NM_001199    | BMP1     | 1317 | 1390 | 8.58392413115 |               |
| NM_001199    | BMP1     | 367  | 447  | 9.58391763602 |               |
| NM_001196    | BID      | 973  | 1035 | 7.16451820421 |               |
| NM_001196    | BID      | 303  | 501  | 8.16853580439 |               |
| NM_001196    | BID      | 690  | 924  | 9.83150081711 |               |
| NM_001196    | BID      | 247  | 298  | 5.58339955335 |               |
| NM_001196    | BID      | 106  | 247  | 8.58357330367 |               |
| NM_021254    | C21orf59 |      | 504  | 605           | 4.60982790221 |
| NM_021254    | C21orf59 |      | 108  | 170           | 4.0248654017  |
| NM_017607    | PPP1R12C |      | 2632 | 2703          | 6.75092436122 |
| NM_017607    | PPP1R12C |      | 775  | 851           | 5.75092436145 |
| NM_017607    | PPP1R12C |      | 1484 | 1534          | 5.7509243539  |
| NM_017607    | PPP1R12C |      | 676  | 724           | 5.75092436145 |
| NM_017607    | PPP1R12C |      | 951  | 1009          | 7.75092436145 |
| NM_017607    | PPP1R12C |      | 320  | 377           | 5.75075061113 |
| NM_017607    | PPP1R12C |      | 2232 | 2351          | 5.75092436145 |
| NM_017607    | PPP1R12C |      | 1077 | 1143          | 7.75092436144 |
| NM_012218    | ILF3     | 2641 | 2701 | 3.39273900146 |               |
| NM_012218    | ILF3     | 4921 | 4985 | 4.39273900146 |               |
| NM_012218    | ILF3     | 3958 | 3999 | 4.30859979208 |               |
| NM_012218    | ILF3     | 613  | 676  | 5.39273900124 |               |
| NM_012218    | ILF3     | 2438 | 2506 | 4.97770150218 |               |
| NM_012218    | ILF3     | 3641 | 3737 | 4.97770150219 |               |
| NM_012218    | ILF3     | 3324 | 3401 | 3.39273899392 |               |
| NM_012218    | ILF3     | 1610 | 1676 | 5.71466709635 |               |
| NM_012218    | ILF3     | 719  | 787  | 5.39273900146 |               |
| NM_012218    | ILF3     | 1176 | 1214 | 3.30859979208 |               |
| NM_012218    | ILF3     | 1130 | 1175 | 4.39273900124 |               |
| NM_012218    | ILF3     | 1973 | 2027 | 3.39273899392 |               |
| NM_012218    | ILF3     | 4304 | 4436 | 5.39273900146 |               |
| NM_012218    | ILF3     | 794  | 834  | 4.39273899392 |               |
| NM_012218    | ILF3     | 1040 | 1095 | 4.39273900146 |               |
| NM_012218    | ILF3     | 961  | 1036 | 5.39273900146 |               |

|           |        |      |      |               |
|-----------|--------|------|------|---------------|
| NM_012218 | ILF3   | 4479 | 4657 | 4.97770150219 |
| NM_012218 | ILF3   | 1524 | 1586 | 5.39273900146 |
| NM_012218 | ILF3   | 516  | 609  | 4.97770150219 |
| NM_012218 | ILF3   | 1856 | 1963 | 4.39273900146 |
| NM_012218 | ILF3   | 5859 | 6042 | 6.56266400291 |
| NM_012218 | ILF3   | 65   | 108  | 4.97769477113 |
| NM_012218 | ILF3   | 3151 | 3324 | 7.91630095752 |
| NM_012218 | ILF3   | 1216 | 1268 | 3.39273227041 |
| NM_012218 | ILF3   | 5115 | 5150 | 4.38872140129 |
| NM_012218 | ILF3   | 5678 | 5747 | 4.39273876555 |
| NM_012218 | ILF3   | 847  | 941  | 5.71466709635 |
| NM_012218 | ILF3   | 1676 | 1772 | 5.71466709635 |
| NM_012218 | ILF3   | 4721 | 4837 | 4.97770150219 |
| NM_012218 | ILF3   | 3416 | 3524 | 5.97770150219 |
| NM_012218 | ILF3   | 5271 | 5353 | 5.39273900146 |
| NM_012218 | ILF3   | 3053 | 3128 | 3.39256525115 |
| NM_012218 | ILF3   | 165  | 269  | 4.39273900146 |
| NM_012218 | ILF3   | 2256 | 2400 | 4.97770150219 |
| NM_012218 | ILF3   | 4108 | 4218 | 4.97770150219 |
| NM_012218 | ILF3   | 2044 | 2164 | 5.71466709635 |
| NM_012218 | ILF3   | 3806 | 3882 | 5.39273900146 |
| NM_012218 | ILF3   | 300  | 504  | 6.71466709635 |
| NM_012218 | ILF3   | 5150 | 5257 | 6.20009392352 |
| NM_012218 | ILF3   | 5486 | 5576 | 4.39273900146 |
| NM_012218 | ILF3   | 2947 | 3043 | 3.39273900146 |
| NM_012218 | ILF3   | 1275 | 1414 | 4.39273900146 |
| NM_012215 | MGEA5  | 4509 | 4561 | 5.2407802171  |
| NM_012215 | MGEA5  | 1449 | 1501 | 5.32090182631 |
| NM_012215 | MGEA5  | 2404 | 2448 | 6.32090182631 |
| NM_012215 | MGEA5  | 4358 | 4417 | 4.32090182631 |
| NM_012215 | MGEA5  | 638  | 696  | 5.32090182631 |
| NM_012215 | MGEA5  | 1302 | 1335 | 4.2407802171  |
| NM_012215 | MGEA5  | 3123 | 3192 | 5.32491919057 |
| NM_012215 | MGEA5  | 2154 | 2219 | 5.90586432703 |
| NM_012214 | MGAT4A | 1834 | 1885 | 6.45613559301 |
| NM_012214 | MGAT4A | 2396 | 2440 | 5.45211799284 |
| NM_012214 | MGAT4A | 8168 | 8214 | 5.37199638362 |
| NM_012214 | MGAT4A | 864  | 900  | 4.45211799284 |
| NM_012214 | MGAT4A | 7161 | 7223 | 6.04109785781 |
| NM_012214 | MGAT4A | 5962 | 6050 | 5.45612886196 |
| NM_012214 | MGAT4A | 1196 | 1264 | 6.04109809372 |
| NM_012214 | MGAT4A | 1908 | 1955 | 4.45613558546 |
| NM_012214 | MGAT4A | 2003 | 2079 | 5.45613559301 |
| NM_012214 | MGAT4A | 2741 | 2816 | 5.37199638362 |
| NM_012214 | MGAT4A | 482  | 540  | 4.45613558546 |
| NM_012214 | MGAT4A | 787  | 834  | 6.04109809372 |
| NM_012214 | MGAT4A | 372  | 477  | 6.04109809373 |
| NM_012214 | MGAT4A | 1131 | 1190 | 6.45613558546 |
| NM_012214 | MGAT4A | 541  | 576  | 5.45613535709 |
| NM_012214 | MGAT4A | 1273 | 1346 | 6.04109808618 |

|              |        |      |      |               |
|--------------|--------|------|------|---------------|
| NM_012214    | MGAT4A | 670  | 717  | 5.37199638362 |
| NM_012214    | MGAT4A | 7580 | 7636 | 4.45211799284 |
| NM_012214    | MGAT4A | 6796 | 6884 | 5.45613558546 |
| NM_012214    | MGAT4A | 2900 | 2945 | 5.37199638362 |
| NM_012214    | MGAT4A | 4095 | 4145 | 5.45612886196 |
| NM_012214    | MGAT4A | 8220 | 8320 | 6.7780636879  |
| NM_012214    | MGAT4A | 4464 | 4512 | 4.45612886196 |
| NM_012214    | MGAT4A | 5329 | 5400 | 4.45613535709 |
| NM_012214    | MGAT4A | 282  | 354  | 6.04109809373 |
| NM_012214    | MGAT4A | 1576 | 1815 | 8.04109809373 |
| NM_012214    | MGAT4A | 127  | 219  | 5.456135593   |
| NM_012214    | MGAT4A | 1479 | 1575 | 4.45612886196 |
| NM_012214    | MGAT4A | 6238 | 6301 | 5.45596184269 |
| NM_001997    | FAU    | 491  | 551  | 4.65605855382 |
| NM_001997    | FAU    | 24   | 159  | 6.37226558782 |
| NM_001997    | FAU    | 360  | 491  | 4.65605855382 |
| NM_001997    | FAU    | 169  | 318  | 5.17063172665 |
| NM_001995    | ACSL1  | 2653 | 2729 | 8.51931528565 |
| NM_001995    | ACSL1  | 189  | 247  | 6.51931528565 |
| NM_001995    | ACSL1  | 1443 | 1483 | 7.5193085546  |
| NM_001995    | ACSL1  | 438  | 492  | 6.5193085546  |
| NM_001995    | ACSL1  | 2756 | 2827 | 8.51529768548 |
| NM_001995    | ACSL1  | 1002 | 1084 | 8.10427755045 |
| NM_001995    | ACSL1  | 3733 | 3786 | 6.5193085546  |
| NM_001995    | ACSL1  | 3157 | 3233 | 8.10427778637 |
| NM_001995    | ACSL1  | 3636 | 3712 | 6.5193152781  |
| NM_001995    | ACSL1  | 676  | 859  | 9.68924028709 |
| NM_001995    | ACSL1  | 1128 | 1407 | 10.6892402871 |
| NM_001995    | ACSL1  | 895  | 1000 | 9.32667020771 |
| NM_001995    | ACSL1  | 539  | 651  | 8.84124338054 |
| NM_001995    | ACSL1  | 2377 | 2456 | 6.51931504973 |
| NM_001995    | ACSL1  | 1488 | 1734 | 9.97874690429 |
| NM_001995    | ACSL1  | 256  | 410  | 9.32667020771 |
| NM_001995    | ACSL1  | 2023 | 2338 | 10.2197550038 |
| NM_001995    | ACSL1  | 1747 | 1902 | 8.10427778637 |
| NM_001992    | F2R    | 999  | 1072 | 9.51224761126 |
| NM_001992    | F2R    | 142  | 187  | 8.42811513293 |
| NM_001992    | F2R    | 534  | 592  | 10.0931992429 |
| NM_001992    | F2R    | 706  | 805  | 10.8341824372 |
| NM_001992    | F2R    | 1096 | 1323 | 11.5122543423 |
| NM_001993    | F3     | 1430 | 1562 | 7.64546490908 |
| NM_001990    | EYA3   | 2070 | 2111 | 9.04227858821 |
| NM_001990    | EYA3   | 435  | 497  | 7.95813937882 |
| NM_001990    | EYA3   | 2037 | 2060 | 8.04227185715 |
| NM_001990    | EYA3   | 4304 | 4404 | 9.03826098803 |
| NM_001990    | EYA3   | 4765 | 4849 | 9.04227858821 |
| NM_001990    | EYA3   | 5847 | 5957 | 9.04227858821 |
| NM_001990    | EYA3   | 1250 | 1320 | 9.04227835229 |
| NM_001195381 | GPR35  | 450  | 503  | 9.1281552582  |
| NM_001195381 | GPR35  | 600  | 631  | 7.4590535481  |

|              |        |      |      |               |
|--------------|--------|------|------|---------------|
| NM_001195381 | GPR35  | 803  | 847  | 7.54319275748 |
| NM_001195381 | GPR35  | 1958 | 2031 | 8.54319275726 |
| NM_001195381 | GPR35  | 525  | 599  | 9.54319275748 |
| NM_001195381 | GPR35  | 1633 | 1803 | 10.1281552582 |
| NM_001195381 | GPR35  | 360  | 427  | 7.54319275748 |
| NM_001195381 | GPR35  | 639  | 779  | 9.86512085237 |
| NM_182709    | KAT5   | 986  | 1088 | 7.5666460382  |
| NM_000029    | AGT    | 470  | 564  | 3.10215896807 |
| NM_000029    | AGT    | 568  | 693  | 3.75423566465 |
| NM_000029    | AGT    | 2354 | 2523 | 4.54273155946 |
| NM_000029    | AGT    | 694  | 1939 | 7.75423566465 |
| NM_000029    | AGT    | 219  | 317  | 1.2948038101  |
| NM_000029    | AGT    | 2016 | 2308 | 5.20169464162 |
| NM_178237    | EXOC1  | 3253 | 3288 | 6.0614807271  |
| NM_178237    | EXOC1  | 2232 | 2262 | 6.0614807271  |
| NM_178237    | EXOC1  | 1633 | 1661 | 6.0614807271  |
| NM_178237    | EXOC1  | 1958 | 2027 | 6.06549831972 |
| NM_178237    | EXOC1  | 2691 | 2749 | 7.0614807271  |
| NM_178237    | EXOC1  | 871  | 956  | 6.0614807271  |
| NM_178237    | EXOC1  | 1073 | 1143 | 8.06532457695 |
| NM_178238    | PILRB  | 1198 | 1255 | 7.89761645223 |
| NM_178238    | PILRB  | 636  | 697  | 6.81749484302 |
| NM_181507    | HPS5   | 2499 | 2576 | 9.13206654498 |
| NM_181507    | HPS5   | 1335 | 1402 | 7.54710404426 |
| NM_021998    | ZNF711 | 4033 | 4088 | 5.3703103476  |
| NM_000026    | ADSL   | 467  | 520  | 4.11957192953 |
| NM_000026    | ADSL   | 381  | 453  | 4.70436741098 |
| NM_000026    | ADSL   | 246  | 334  | 4.11957866036 |
| NM_000026    | ADSL   | 1038 | 1155 | 5.92693358264 |
| NM_000026    | ADSL   | 571  | 672  | 5.44150675547 |
| NM_000026    | ADSL   | 678  | 799  | 5.11957866058 |
| NM_000021    | PSEN1  | 67   | 148  | 6.00031233425 |
| NM_000021    | PSEN1  | 1130 | 1195 | 7.58527483497 |
| NM_000021    | PSEN1  | 1552 | 1630 | 7.00031257017 |
| NM_000021    | PSEN1  | 1685 | 1782 | 9.00031257017 |
| NM_000021    | PSEN1  | 2121 | 2184 | 8.00031256995 |
| NM_000021    | PSEN1  | 1631 | 1676 | 8.58527507089 |
| NM_000021    | PSEN1  | 2269 | 2407 | 9.32224066506 |
| NM_000021    | PSEN1  | 148  | 180  | 5.99629497    |
| NM_000021    | PSEN1  | 191  | 237  | 6.00013881985 |
| NM_000021    | PSEN1  | 986  | 1083 | 10.2482400836 |
| NM_000021    | PSEN1  | 3990 | 4034 | 6.00013881985 |
| NM_000021    | PSEN1  | 1398 | 1519 | 8.32224066506 |
| NM_000021    | PSEN1  | 1254 | 1379 | 8.80766749223 |
| NM_000021    | PSEN1  | 2672 | 2795 | 9.00031257017 |
| NM_000021    | PSEN1  | 1786 | 1955 | 9.00031257017 |
| NM_000021    | PSEN1  | 1993 | 2115 | 9.17023757161 |
| NM_000021    | PSEN1  | 627  | 922  | 11.3222406651 |
| NM_000021    | PSEN1  | 277  | 617  | 9.58527507089 |
| NM_000021    | PSEN1  | 4773 | 4844 | 7.58125747072 |

|           |          |      |      |               |               |
|-----------|----------|------|------|---------------|---------------|
| NM_181503 | EXOSC8   | 524  | 592  | 4.73687371522 |               |
| NM_181503 | EXOSC8   | 708  | 791  | 3.14789362188 |               |
| NM_181503 | EXOSC8   | 604  | 697  | 4.73687372255 |               |
| NM_181503 | EXOSC8   | 903  | 1033 | 5.95926614411 |               |
| NM_181500 | CUX1     | 839  | 876  | 6.17506150261 |               |
| NM_181500 | CUX1     | 1276 | 1351 | 4.6702206111  |               |
| NM_181500 | CUX1     | 2117 | 2146 | 4.59009900189 |               |
| NM_145061 | SKA3     | 2012 | 2035 | 7.50889880453 |               |
| NM_145062 | ZUFSP    | 1721 | 1776 | 8.45276218861 |               |
| NM_145062 | ZUFSP    | 1265 | 1310 | 8.95358571587 |               |
| NM_145062 | ZUFSP    | 799  | 865  | 8.45258867421 |               |
| NM_003224 | ARFRP1   | 398  | 434  | 4.05581749121 |               |
| NM_003224 | ARFRP1   | 328  | 391  | 5.63693614207 |               |
| NM_017934 | PHIP     | 1139 | 1226 | 6.95691216645 |               |
| NM_017934 | PHIP     | 9228 | 9276 | 5.36793206578 |               |
| NM_017934 | PHIP     | 952  | 1013 | 5.3719429349  |               |
| NM_017934 | PHIP     | 3972 | 4021 | 6.37177591563 |               |
| NM_017934 | PHIP     | 861  | 938  | 5.3719496584  |               |
| NM_017934 | PHIP     | 1621 | 1679 | 5.28781045657 |               |
| NM_017934 | PHIP     | 763  | 854  | 7.37194966595 |               |
| NM_017934 | PHIP     | 1380 | 1451 | 6.3719429349  |               |
| NM_203462 | MRFAP1L1 |      | 287  | 328           | 3.74499102083 |
| NM_203462 | MRFAP1L1 |      | 871  | 951           | 6.06709286603 |
| NM_203462 | MRFAP1L1 |      | 955  | 1038          | 3.74515804009 |
| NM_203463 | CERS6    | 1295 | 1379 | 11.500440133  |               |
| NM_203463 | CERS6    | 1696 | 1749 | 9.50044013297 |               |
| NM_203463 | CERS6    | 3076 | 3124 | 8.9154776247  |               |
| NM_203463 | CERS6    | 1845 | 1911 | 8.91530388193 |               |
| NM_203463 | CERS6    | 5663 | 5716 | 9.50043989705 |               |
| NM_203463 | CERS6    | 6037 | 6112 | 9.4964225328  |               |
| NM_203463 | CERS6    | 718  | 856  | 12.6159173504 |               |
| NM_203463 | CERS6    | 5063 | 5174 | 8.91547763225 |               |
| NM_203463 | CERS6    | 2136 | 2215 | 9.50044013297 |               |
| NM_203463 | CERS6    | 3198 | 3266 | 8.9154776247  |               |
| NM_203463 | CERS6    | 5507 | 5550 | 7.91146003208 |               |
| NM_203463 | CERS6    | 630  | 706  | 10.9154776323 |               |
| NM_203463 | CERS6    | 6615 | 6668 | 8.9154709012  |               |
| NM_203463 | CERS6    | 140  | 627  | 13.1634051457 |               |
| NM_203463 | CERS6    | 2023 | 2133 | 10.7228325543 |               |
| NM_203463 | CERS6    | 5827 | 5883 | 8.91530388193 |               |
| NM_203463 | CERS6    | 6340 | 6407 | 7.91146003208 |               |
| NM_203463 | CERS6    | 1490 | 1695 | 12.3749092509 |               |
| NM_203463 | CERS6    | 4352 | 4440 | 8.91530388193 |               |
| NM_203463 | CERS6    | 3934 | 4077 | 10.500440133  |               |
| NM_203463 | CERS6    | 863  | 1291 | 13.9598717516 |               |
| NM_203463 | CERS6    | 3705 | 3791 | 9.9154776247  |               |
| NM_203463 | CERS6    | 6695 | 6780 | 9.91547763225 |               |
| NM_017931 | TTC38    | 1379 | 1446 | 5.11810779763 |               |
| NM_017931 | TTC38    | 2331 | 2372 | 5.0339753193  |               |
| NM_017931 | TTC38    | 2128 | 2174 | 4.11409692851 |               |

|           |        |      |      |               |
|-----------|--------|------|------|---------------|
| NM_017931 | TTC38  | 2076 | 2126 | 5.11811429277 |
| NM_017931 | TTC38  | 1068 | 1104 | 4.0339753193  |
| NM_017931 | TTC38  | 2192 | 2325 | 6.70307702941 |
| NM_017931 | TTC38  | 1867 | 1992 | 7.11811452868 |
| NM_017931 | TTC38  | 290  | 367  | 5.7030770294  |
| NM_017931 | TTC38  | 752  | 900  | 7.81855424683 |
| NM_017931 | TTC38  | 532  | 684  | 6.11811452868 |
| NM_017931 | TTC38  | 410  | 484  | 5.70307702941 |
| NM_032223 | PCNXL3 | 5491 | 5547 | 10.7692507794 |
| NM_032223 | PCNXL3 | 4245 | 4319 | 9.76925077945 |
| NM_032223 | PCNXL3 | 3697 | 3788 | 10.5062163736 |
| NM_032223 | PCNXL3 | 5694 | 5738 | 8.18428154767 |
| NM_032223 | PCNXL3 | 4108 | 4154 | 8.18027067855 |
| NM_032223 | PCNXL3 | 5933 | 6012 | 10.1842882787 |
| NM_032223 | PCNXL3 | 4371 | 4395 | 8.18411452841 |
| NM_032223 | PCNXL3 | 5290 | 5338 | 8.18027067855 |
| NM_032223 | PCNXL3 | 4065 | 4098 | 8.10014906934 |
| NM_032223 | PCNXL3 | 6238 | 6320 | 10.1842882787 |
| NM_032223 | PCNXL3 | 444  | 564  | 10.5062163736 |
| NM_032223 | PCNXL3 | 1510 | 1579 | 9.10014906934 |
| NM_032223 | PCNXL3 | 5882 | 5930 | 8.18027067855 |
| NM_032223 | PCNXL3 | 2546 | 2768 | 12.3542132802 |
| NM_032223 | PCNXL3 | 3282 | 3431 | 9.18428827873 |
| NM_032223 | PCNXL3 | 6494 | 6533 | 10.1841145284 |
| NM_032223 | PCNXL3 | 2945 | 3062 | 10.7692507794 |
| NM_032223 | PCNXL3 | 2283 | 2407 | 9.18428827873 |
| NM_032223 | PCNXL3 | 6081 | 6234 | 11.6437198974 |
| NM_032223 | PCNXL3 | 4675 | 4849 | 10.7692507794 |
| NM_032223 | PCNXL3 | 1254 | 1385 | 10.5062163736 |
| NM_032223 | PCNXL3 | 5107 | 5161 | 9.18428804281 |
| NM_032223 | PCNXL3 | 84   | 304  | 11.7692507794 |
| NM_032223 | PCNXL3 | 2416 | 2505 | 10.1842882787 |
| NM_032223 | PCNXL3 | 3796 | 4062 | 10.9916432008 |
| NM_032223 | PCNXL3 | 1990 | 2197 | 11.3542132802 |
| NM_032223 | PCNXL3 | 1130 | 1219 | 9.18428804281 |
| NM_032223 | PCNXL3 | 742  | 832  | 8.18027067855 |
| NM_032223 | PCNXL3 | 2771 | 2834 | 10.1842882787 |
| NM_032223 | PCNXL3 | 4557 | 4668 | 10.1842882787 |
| NM_032223 | PCNXL3 | 652  | 727  | 10.1841145284 |
| NM_032223 | PCNXL3 | 3487 | 3693 | 11.3542132802 |
| NM_032223 | PCNXL3 | 1900 | 1963 | 8.18428804281 |
| NM_207518 | PRKACA | 1487 | 1531 | 5.85848563198 |
| NM_207518 | PRKACA | 2371 | 2453 | 8.44746573287 |
| NM_207518 | PRKACA | 586  | 633  | 5.8624965011  |
| NM_207518 | PRKACA | 1677 | 1749 | 5.85848563198 |
| NM_207518 | PRKACA | 635  | 697  | 5.86250323193 |
| NM_207518 | PRKACA | 955  | 1057 | 6.86250323215 |
| NM_207518 | PRKACA | 393  | 537  | 8.18443132704 |
| NM_207518 | PRKACA | 103  | 344  | 9.76939382776 |
| NM_004924 | ACTN4  | 3147 | 3225 | 5.1030910295  |



|           |         |      |      |               |
|-----------|---------|------|------|---------------|
| NM_004924 | ACTN4   | 2345 | 2402 | 3.29573610745 |
| NM_004924 | ACTN4   | 1887 | 1970 | 4.29573610745 |
| NM_004924 | ACTN4   | 1051 | 1147 | 5.1030910295  |
| NM_004924 | ACTN4   | 2274 | 2345 | 4.29573610745 |
| NM_004924 | ACTN4   | 2072 | 2251 | 5.99617582559 |
| NM_004924 | ACTN4   | 3612 | 3924 | 7.42501912439 |
| NM_004924 | ACTN4   | 1235 | 1690 | 7.29573610745 |
| NM_004924 | ACTN4   | 3401 | 3526 | 5.29573610745 |
| NM_004924 | ACTN4   | 1691 | 1874 | 6.20262670305 |
| NM_004924 | ACTN4   | 2795 | 2974 | 5.88069860817 |
| NM_004924 | ACTN4   | 1153 | 1210 | 2.29573610745 |
| NM_004924 | ACTN4   | 2406 | 2765 | 7.05062360961 |
| NM_004924 | ACTN4   | 645  | 1041 | 7.29573610745 |
| NM_004924 | ACTN4   | 198  | 637  | 7.29573610745 |
| NM_004924 | ACTN4   | 74   | 187  | 3.88069860817 |
| NM_004924 | ACTN4   | 3252 | 3384 | 3.88069860817 |
| NM_004924 | ACTN4   | 2988 | 3133 | 6.61766420233 |
| NM_004924 | ACTN4   | 1975 | 2044 | 3.29573610744 |
| NM_004926 | ZFP36L1 | 3277 | 3323 | 8.96000379806 |
| NM_004926 | ZFP36L1 | 934  | 973  | 6.37102369716 |
| NM_004926 | ZFP36L1 | 2788 | 2850 | 7.96000379806 |
| NM_004926 | ZFP36L1 | 1855 | 1909 | 6.37504106142 |
| NM_004926 | ZFP36L1 | 3405 | 3538 | 9.18239621939 |
| NM_004926 | ZFP36L1 | 2954 | 3026 | 6.37102369716 |
| NM_004926 | ZFP36L1 | 868  | 911  | 6.37503456628 |
| NM_004926 | ZFP36L1 | 2639 | 2779 | 9.37504129734 |
| NM_004927 | MRPL49  | 1957 | 2040 | 4.06076185614 |
| NM_004927 | MRPL49  | 215  | 257  | 5.6455506141  |
| NM_004927 | MRPL49  | 339  | 394  | 5.06075513264 |
| NM_004927 | MRPL49  | 921  | 969  | 5.05674426352 |
| NM_004927 | MRPL49  | 1060 | 1124 | 4.06058811337 |
| NM_004927 | MRPL49  | 1757 | 1838 | 6.38268322753 |
| NM_004927 | MRPL49  | 419  | 497  | 6.05674426352 |
| NM_004922 | SEC24C  | 4310 | 4368 | 5.77061328458 |
| NM_004922 | SEC24C  | 668  | 733  | 6.35556905425 |
| NM_004922 | SEC24C  | 162  | 213  | 4.6864740752  |
| NM_004922 | SEC24C  | 3595 | 3655 | 6.3555757853  |
| NM_004922 | SEC24C  | 2806 | 2859 | 5.77043953426 |
| NM_004922 | SEC24C  | 3115 | 3154 | 4.77043953426 |
| NM_004922 | SEC24C  | 1415 | 1465 | 5.77043953426 |
| NM_004922 | SEC24C  | 1972 | 2093 | 6.3555757853  |
| NM_004922 | SEC24C  | 813  | 901  | 6.3555757853  |
| NM_004922 | SEC24C  | 1525 | 1671 | 7.3555757853  |
| NM_004922 | SEC24C  | 4148 | 4191 | 6.35540203498 |
| NM_004922 | SEC24C  | 2110 | 2314 | 8.09254137947 |
| NM_004922 | SEC24C  | 3682 | 3795 | 5.77061328458 |
| NM_004922 | SEC24C  | 2897 | 3111 | 8.57796820664 |
| NM_004922 | SEC24C  | 1682 | 1801 | 7.77061328458 |
| NM_004922 | SEC24C  | 3982 | 4117 | 7.09254137947 |
| NM_004922 | SEC24C  | 1884 | 1969 | 6.77061328436 |

|              |         |      |      |               |
|--------------|---------|------|------|---------------|
| NM_004922    | SEC24C  | 3374 | 3467 | 6.77061328458 |
| NM_004922    | SEC24C  | 2350 | 2789 | 9.3555757853  |
| NM_004255    | COX5A   | 719  | 767  | 6.58688035408 |
| NM_004255    | COX5A   | 411  | 448  | 5.58688035409 |
| NM_004255    | COX5A   | 91   | 236  | 5.58688035409 |
| NM_004255    | COX5A   | 291  | 371  | 6.00191785337 |
| NM_004255    | COX5A   | 449  | 695  | 8.08938069462 |
| NM_022828    | YTHDC2  | 2077 | 2129 | 6.78927653071 |
| NM_022828    | YTHDC2  | 1902 | 1951 | 7.86939813992 |
| NM_022821    | ELOVL1  | 154  | 213  | 9.42081170589 |
| NM_022821    | ELOVL1  | 1226 | 1292 | 8.42081170589 |
| NM_022821    | ELOVL1  | 1367 | 1412 | 9.74273980077 |
| NM_022821    | ELOVL1  | 97   | 149  | 8.41679410571 |
| NM_022821    | ELOVL1  | 215  | 333  | 10.5907367073 |
| NM_022821    | ELOVL1  | 786  | 962  | 11.121251424  |
| NM_022821    | ELOVL1  | 645  | 763  | 10.5907367073 |
| NM_022821    | ELOVL1  | 336  | 642  | 12.3277023015 |
| NM_022821    | ELOVL1  | 969  | 1153 | 10.0057742066 |
| NM_198504    | PAQR9   | 1880 | 1929 | 9.25550446906 |
| NM_198504    | PAQR9   | 1171 | 1250 | 10.2555044691 |
| NM_022827    | SPATA20 | 973  | 1031 | 6.16793355424 |
| NM_022827    | SPATA20 | 2138 | 2182 | 6.25206603257 |
| NM_022827    | SPATA20 | 1535 | 1611 | 7.8370352568  |
| NM_022826    | MARCH7  | 3144 | 3209 | 7.07489942705 |
| NM_022826    | MARCH7  | 797  | 834  | 6.65968817746 |
| NM_022826    | MARCH7  | 947  | 1022 | 7.39682752193 |
| NM_022826    | MARCH7  | 390  | 486  | 6.07489942705 |
| NM_022826    | MARCH7  | 2446 | 2505 | 6.65968817746 |
| NM_022826    | MARCH7  | 335  | 390  | 5.07088182688 |
| NM_022826    | MARCH7  | 1894 | 2046 | 6.65986192777 |
| NM_022826    | MARCH7  | 526  | 595  | 5.07472567673 |
| NM_022826    | MARCH7  | 249  | 333  | 7.074892696   |
| NM_022826    | MARCH7  | 2109 | 2232 | 6.65986192777 |
| NM_022826    | MARCH7  | 1781 | 1877 | 6.07472567673 |
| NM_022826    | MARCH7  | 1042 | 1214 | 8.07489942705 |
| NM_001135673 | ATL2    | 576  | 661  | 6.5376870603  |
| NM_001135673 | ATL2    | 2790 | 2837 | 3.36776205886 |
| NM_001135673 | ATL2    | 304  | 367  | 3.36374445869 |
| NM_001135673 | ATL2    | 745  | 819  | 6.36776205886 |
| NM_001135673 | ATL2    | 429  | 470  | 3.36374445869 |
| NM_001135673 | ATL2    | 2503 | 2569 | 4.36776205131 |
| NM_001135673 | ATL2    | 946  | 1035 | 4.36776205886 |
| NM_001135673 | ATL2    | 1429 | 1716 | 6.68969015375 |
| NM_001135673 | ATL2    | 1039 | 1150 | 4.36776205886 |
| NM_001135673 | ATL2    | 149  | 288  | 6.5376870603  |
| NM_001135673 | ATL2    | 1280 | 1405 | 5.68969015375 |
| NM_001135673 | ATL2    | 2087 | 2227 | 5.68969015375 |
| NM_001135673 | ATL2    | 498  | 567  | 4.36775532781 |
| NM_001135673 | ATL2    | 2596 | 2706 | 5.95272455958 |
| NM_001135673 | ATL2    | 1716 | 1917 | 6.68969015375 |

|           |       |      |      |               |
|-----------|-------|------|------|---------------|
| NM_005966 | NAB1  | 2899 | 2968 | 5.56546090186 |
| NM_005966 | NAB1  | 1174 | 1236 | 6.56529388259 |
| NM_003594 | TTF2  | 1874 | 1960 | 7.91057254244 |
| NM_003594 | TTF2  | 3492 | 3604 | 7.91459014261 |
| NM_003595 | TPST2 | 979  | 1085 | 9.33964367089 |
| NM_003595 | TPST2 | 588  | 638  | 8.33946992812 |
| NM_003595 | TPST2 | 1418 | 1555 | 8.33964367843 |
| NM_003595 | TPST2 | 676  | 777  | 10.3396436784 |
| NM_003596 | TPST1 | 557  | 608  | 7.89761487014 |
| NM_003596 | TPST1 | 331  | 421  | 7.89761510606 |
| NM_003596 | TPST1 | 727  | 765  | 7.89359750589 |
| NM_003596 | TPST1 | 243  | 313  | 8.89761510606 |
| NM_003596 | TPST1 | 929  | 1036 | 8.31265260534 |
| NM_003596 | TPST1 | 434  | 492  | 6.31247885502 |
| NM_003596 | TPST1 | 1800 | 1865 | 7.89359750589 |
| NM_003596 | TPST1 | 1728 | 1772 | 8.31247885502 |
| NM_003596 | TPST1 | 1195 | 1274 | 7.89761509851 |
| NM_003596 | TPST1 | 1049 | 1121 | 7.31264587429 |
| NM_003596 | TPST1 | 1335 | 1474 | 7.89761510606 |
| NM_003590 | CUL3  | 1389 | 1462 | 4.36188584211 |
| NM_003590 | CUL3  | 352  | 414  | 3.36171209179 |
| NM_003590 | CUL3  | 1715 | 1771 | 6.16924076416 |
| NM_003590 | CUL3  | 1860 | 1921 | 4.36188584188 |
| NM_003590 | CUL3  | 1296 | 1379 | 3.36171209179 |
| NM_003590 | CUL3  | 2704 | 2757 | 3.36188584188 |
| NM_003590 | CUL3  | 2505 | 2576 | 4.36171209179 |
| NM_003590 | CUL3  | 1480 | 1583 | 4.94684834261 |
| NM_003590 | CUL3  | 2006 | 2124 | 4.94684834283 |
| NM_003590 | CUL3  | 481  | 643  | 6.36188584211 |
| NM_003592 | CUL1  | 218  | 256  | 5.71072406205 |
| NM_003592 | CUL1  | 744  | 821  | 6.79486326389 |
| NM_003592 | CUL1  | 1498 | 1570 | 5.79486327122 |
| NM_003592 | CUL1  | 1920 | 1957 | 4.79084567126 |
| NM_003592 | CUL1  | 1880 | 1912 | 5.79468952112 |
| NM_003592 | CUL1  | 565  | 652  | 6.37982576461 |
| NM_003592 | CUL1  | 257  | 407  | 6.79486327144 |
| NM_003598 | TEAD2 | 878  | 949  | 9.49184571743 |
| NM_003598 | TEAD2 | 951  | 1042 | 9.49167196733 |
| NM_003598 | TEAD2 | 1225 | 1323 | 10.0768082184 |
| NM_003598 | TEAD2 | 1327 | 1379 | 8.48782811748 |
| NM_003598 | TEAD2 | 449  | 539  | 10.0727906182 |
| NM_025109 | MY019 | 2613 | 2672 | 9.92975297388 |
| NM_025109 | MY019 | 1091 | 1159 | 8.34479023724 |
| NM_025109 | MY019 | 2504 | 2556 | 8.34479047316 |
| NM_025109 | MY019 | 1199 | 1254 | 8.92975297388 |
| NM_025109 | MY019 | 921  | 1007 | 9.92975297388 |
| NM_025109 | MY019 | 3157 | 3221 | 9.34479023724 |
| NM_025109 | MY019 | 2762 | 2815 | 8.26065126378 |
| NM_025109 | MY019 | 818  | 896  | 8.34479047316 |
| NM_025109 | MY019 | 1795 | 1834 | 8.92974624283 |

|              |         |      |      |               |
|--------------|---------|------|------|---------------|
| NM_025109    | MY019   | 2968 | 3036 | 9.34479047316 |
| NM_025109    | MY019   | 670  | 706  | 7.26065126378 |
| NM_025109    | MY019   | 2343 | 2447 | 9.34479047316 |
| NM_025109    | MY019   | 3224 | 3282 | 7.26065126378 |
| NM_025109    | MY019   | 2183 | 2308 | 10.1521453952 |
| NM_025109    | MY019   | 713  | 800  | 8.92975297388 |
| NM_025109    | MY019   | 2875 | 2960 | 7.34479047316 |
| NM_025109    | MY019   | 1880 | 2033 | 9.34479047316 |
| NM_025109    | MY019   | 1500 | 1630 | 9.66671856805 |
| NM_025109    | MY019   | 2039 | 2168 | 9.34479047316 |
| NM_025109    | MY019   | 1304 | 1424 | 9.92975297388 |
| NM_020464    | NHSL1   | 3310 | 3346 | 6.87555764874 |
| NM_020464    | NHSL1   | 3500 | 3561 | 8.87956851786 |
| NM_020464    | NHSL1   | 1151 | 1228 | 8.87957524891 |
| NM_020464    | NHSL1   | 2417 | 2500 | 9.46453774963 |
| NM_020464    | NHSL1   | 6900 | 6945 | 6.87555764874 |
| NM_020464    | NHSL1   | 3889 | 3966 | 6.87957501299 |
| NM_020464    | NHSL1   | 1904 | 1965 | 6.87555764874 |
| NM_020464    | NHSL1   | 1311 | 1447 | 6.87957524891 |
| NM_020464    | NHSL1   | 2099 | 2144 | 6.87555764874 |
| NM_020464    | NHSL1   | 3603 | 3698 | 7.87957524891 |
| NM_020463    | SMEK2   | 3064 | 3123 | 4.79562775377 |
| NM_020463    | SMEK2   | 4056 | 4092 | 3.71148855194 |
| NM_020463    | SMEK2   | 658  | 719  | 5.38059026204 |
| NM_020463    | SMEK2   | 1076 | 1130 | 5.29645105266 |
| NM_020463    | SMEK2   | 1679 | 1741 | 3.71148855194 |
| NM_020463    | SMEK2   | 2644 | 2718 | 4.79161016115 |
| NM_020463    | SMEK2   | 4873 | 4941 | 3.79562776132 |
| NM_020461    | TUBGCP6 | 933  | 999  | 8.1084637644  |
| NM_020461    | TUBGCP6 | 1175 | 1216 | 7.51948366372 |
| NM_020461    | TUBGCP6 | 2281 | 2374 | 6.5235012639  |
| NM_020461    | TUBGCP6 | 1702 | 1777 | 7.52332751358 |
| NM_020461    | TUBGCP6 | 5905 | 5985 | 7.52349453284 |
| NM_001079874 | VAV3    | 2245 | 2331 | 7.62499345586 |
| NM_001079874 | VAV3    | 2901 | 2983 | 6.6250001869  |
| NM_001079872 | CUL4B   | 3547 | 3593 | 4.2097984834  |
| NM_001079872 | CUL4B   | 2731 | 2797 | 4.2097984834  |
| NM_001079872 | CUL4B   | 2424 | 2503 | 4.29393768524 |
| NM_001079872 | CUL4B   | 2596 | 2673 | 4.28992009261 |
| NM_001171796 | C8orf83 | 1477 | 1530 | 6.16859988055 |
| NM_174912    | FAAH2   | 1224 | 1286 | 7.9036271096  |
| NM_203418    | RCAN1   | 1130 | 1186 | 5.9064231185  |
| NM_203418    | RCAN1   | 1321 | 1407 | 6.98654472771 |
| NM_203418    | RCAN1   | 1680 | 1732 | 7.57150722843 |
| NM_015383    | NBPF14  | 3906 | 3957 | 8.21318287232 |
| NM_015383    | NBPF14  | 9577 | 9655 | 8.21317614882 |
| NM_015383    | NBPF14  | 1994 | 2050 | 9.21318287987 |
| NM_015383    | NBPF14  | 5578 | 5641 | 8.21318287232 |
| NM_015383    | NBPF14  | 7566 | 7617 | 7.21318264395 |
| NM_015383    | NBPF14  | 7013 | 7100 | 9.21318287987 |

|           |        |       |       |               |
|-----------|--------|-------|-------|---------------|
| NM_015383 | NBPF14 | 6595  | 6680  | 9.79814538059 |
| NM_015383 | NBPF14 | 9846  | 9902  | 8.21318287987 |
| NM_015383 | NBPF14 | 2942  | 2987  | 9.53511097476 |
| NM_015383 | NBPF14 | 1790  | 1844  | 7.2091652797  |
| NM_015383 | NBPF14 | 3554  | 3604  | 8.21317614882 |
| NM_015383 | NBPF14 | 7121  | 7211  | 7.21317614882 |
| NM_015383 | NBPF14 | 2436  | 2493  | 8.21300912955 |
| NM_015383 | NBPF14 | 4811  | 4895  | 9.79814538059 |
| NM_015383 | NBPF14 | 7330  | 7399  | 10.0205378019 |
| NM_015383 | NBPF14 | 8052  | 8107  | 10.2131828799 |
| NM_015383 | NBPF14 | 5018  | 5114  | 8.79814538059 |
| NM_015383 | NBPF14 | 4402  | 4467  | 8.79814537304 |
| NM_015383 | NBPF14 | 7768  | 7820  | 7.2091652797  |
| NM_015383 | NBPF14 | 2729  | 2782  | 8.2091652797  |
| NM_015383 | NBPF14 | 2210  | 2255  | 9.53511073884 |
| NM_015383 | NBPF14 | 5238  | 5295  | 8.79814514467 |
| NM_015383 | NBPF14 | 3607  | 3715  | 10.2131828799 |
| NM_015383 | NBPF14 | 4294  | 4333  | 7.2091652797  |
| NM_015383 | NBPF14 | 699   | 788   | 8.79814537304 |
| NM_015383 | NBPF14 | 4082  | 4160  | 9.79814538059 |
| NM_015383 | NBPF14 | 8291  | 8350  | 7.2091652797  |
| NM_015383 | NBPF14 | 2090  | 2190  | 8.79814538059 |
| NM_015383 | NBPF14 | 8863  | 8982  | 7.21318287987 |
| NM_015383 | NBPF14 | 9736  | 9811  | 8.21318287987 |
| NM_015383 | NBPF14 | 6682  | 6758  | 8.79797163028 |
| NM_015383 | NBPF14 | 7853  | 7943  | 7.21317614882 |
| NM_015383 | NBPF14 | 2620  | 2699  | 9.79814538059 |
| NM_015383 | NBPF14 | 4500  | 4609  | 10.0205378019 |
| NM_015383 | NBPF14 | 2815  | 2932  | 9.53511097476 |
| NM_015383 | NBPF14 | 3359  | 3445  | 9.53511097476 |
| NM_015383 | NBPF14 | 6259  | 6356  | 9.79814538059 |
| NM_015383 | NBPF14 | 7214  | 7324  | 9.79814538059 |
| NM_015383 | NBPF14 | 6442  | 6592  | 9.53511097476 |
| NM_015383 | NBPF14 | 5124  | 5216  | 10.0205378019 |
| NM_015383 | NBPF14 | 5753  | 5935  | 10.2131828799 |
| NM_015383 | NBPF14 | 1867  | 1964  | 9.53511097476 |
| NM_014709 | USP34  | 10856 | 10901 | 5.20539369726 |
| NM_014709 | USP34  | 9753  | 9816  | 5.87449540737 |
| NM_014709 | USP34  | 8441  | 8511  | 5.87432165705 |
| NM_014709 | USP34  | 10983 | 11030 | 5.87449540715 |
| NM_014709 | USP34  | 1079  | 1148  | 5.28952617559 |
| NM_014709 | USP34  | 2321  | 2370  | 4.28935915633 |
| NM_014709 | USP34  | 4490  | 4556  | 4.28952617559 |
| NM_014709 | USP34  | 10733 | 10774 | 6.61146076562 |
| NM_014709 | USP34  | 5999  | 6051  | 5.20539369726 |
| NM_014709 | USP34  | 8960  | 9049  | 5.87449540737 |
| NM_014709 | USP34  | 4240  | 4288  | 4.20539369726 |
| NM_014709 | USP34  | 53    | 133   | 5.28952617559 |
| NM_014709 | USP34  | 6118  | 6184  | 6.28935915633 |
| NM_014709 | USP34  | 5559  | 5618  | 4.20539369726 |

|              |         |       |       |                |
|--------------|---------|-------|-------|----------------|
| NM_014709    | USP34   | 10417 | 10496 | 4.28953290665  |
| NM_014709    | USP34   | 2084  | 2125  | 5.28935915633  |
| NM_014709    | USP34   | 9934  | 10032 | 5.2895328991   |
| NM_014709    | USP34   | 10916 | 10963 | 5.28953267073  |
| NM_014709    | USP34   | 2851  | 2896  | 4.20539369726  |
| NM_014709    | USP34   | 5909  | 5961  | 4.28935915633  |
| NM_014709    | USP34   | 336   | 405   | 4.28551530648  |
| NM_014709    | USP34   | 9340  | 9464  | 5.87449540737  |
| NM_014709    | USP34   | 10266 | 10403 | 6.87449540737  |
| NM_014709    | USP34   | 3182  | 3264  | 5.8704778072   |
| NM_014709    | USP34   | 10538 | 10655 | 5.28953290665  |
| NM_014709    | USP34   | 4979  | 5035  | 4.28935915633  |
| NM_014709    | USP34   | 6056  | 6101  | 4.28551530648  |
| NM_014709    | USP34   | 6737  | 6816  | 5.87449517145  |
| NM_014709    | USP34   | 2497  | 2561  | 5.28953290643  |
| NM_014709    | USP34   | 7688  | 7752  | 5.28935915633  |
| NM_014709    | USP34   | 5170  | 5221  | 5.28551530648  |
| NM_014709    | USP34   | 5255  | 5409  | 6.28953290665  |
| NM_014709    | USP34   | 9116  | 9244  | 5.28953290665  |
| NM_014709    | USP34   | 3630  | 3699  | 4.28551530648  |
| NM_014709    | USP34   | 11031 | 11101 | 5.28551530648  |
| NM_014709    | USP34   | 10109 | 10265 | 4.28953290665  |
| NM_013355    | PKN3    | 3041  | 3141  | 8.99083262204  |
| NM_013355    | PKN3    | 981   | 1068  | 8.98681502187  |
| NM_013352    | DSE     | 704   | 740   | 12.3680509363  |
| NM_013352    | DSE     | 2535  | 2606  | 12.3640400672  |
| NM_013352    | DSE     | 1992  | 2048  | 11.7829214163  |
| NM_013352    | DSE     | 550   | 605   | 10.7829214163  |
| NM_013352    | DSE     | 1144  | 1186  | 11.7790775664  |
| NM_001033561 | PHF12   | 1526  | 1596  | 7.0065898032   |
| NM_001033561 | PHF12   | 2733  | 2789  | 6.0065898032   |
| NM_001012635 | IL32    | 235   | 352   | 4.37451189037  |
| NM_001012635 | IL32    | 731   | 813   | 3.95947439109  |
| NM_001012635 | IL32    | 355   | 426   | 3.37451189037  |
| NM_001012635 | IL32    | 463   | 505   | 4.69643997771  |
| NM_001012635 | IL32    | 43    | 206   | 6.07495160851  |
| NM_001012635 | IL32    | 506   | 730   | 5.95947439109  |
| NM_002314    | LIMK1   | 431   | 493   | 8.75070854555  |
| NM_002314    | LIMK1   | 359   | 430   | 7.83083015476  |
| NM_212471    | PRKAR1A | 3453  | 3522  | 2.60396897594  |
| NM_212471    | PRKAR1A | 2574  | 2617  | 0.519829766559 |
| NM_212471    | PRKAR1A | 2241  | 2303  | 0.59995137577  |
| NM_212471    | PRKAR1A | 1892  | 1963  | 2.60396897594  |
| NM_212471    | PRKAR1A | 1488  | 1570  | 2.92589707083  |
| NM_212471    | PRKAR1A | 393   | 443   | 1.60396897594  |
| NM_212471    | PRKAR1A | 2367  | 2431  | 2.60396874002  |
| NM_212471    | PRKAR1A | 2316  | 2355  | 2.10479226728  |
| NM_212471    | PRKAR1A | 559   | 625   | 1.60396874002  |
| NM_212471    | PRKAR1A | 469   | 517   | 0.603962244889 |
| NM_212471    | PRKAR1A | 3704  | 3753  | 2.18893124074  |

|              |          |      |      |                   |
|--------------|----------|------|------|-------------------|
| NM_212471    | PRKAR1A  | 942  | 1017 | 2.18893147666     |
| NM_212471    | PRKAR1A  | 2443 | 2486 | 2.60396896839     |
| NM_212471    | PRKAR1A  | 2647 | 2795 | 3.18893147666     |
| NM_212471    | PRKAR1A  | 2899 | 3050 | 3.60396897594     |
| NM_212471    | PRKAR1A  | 1026 | 1483 | 5.51085957155     |
| NM_002312    | LIG4     | 2563 | 2611 | 6.24712310504     |
| NM_002312    | LIG4     | 335  | 373  | 6.24712310504     |
| NM_002312    | LIG4     | 1764 | 1851 | 7.83208560576     |
| NM_001126121 | SLC25A19 |      | 884  | 952 8.28257474988 |
| NM_013339    | ALG6     | 1498 | 1563 | 12.535798831      |
| NM_013339    | ALG6     | 992  | 1044 | 12.7988332368     |
| NM_013339    | ALG6     | 199  | 286  | 11.7986594865     |
| NM_013339    | ALG6     | 771  | 890  | 13.535798831      |
| NM_013339    | ALG6     | 655  | 724  | 11.7948156366     |
| NM_013339    | ALG6     | 565  | 651  | 12.2138707361     |
| NM_013339    | ALG6     | 1392 | 1483 | 12.535798831      |
| NM_013339    | ALG6     | 1074 | 1175 | 12.2138707285     |
| NM_013339    | ALG6     | 1629 | 1807 | 14.3013335773     |
| NM_013339    | ALG6     | 292  | 434  | 13.0212256581     |
| NM_001174159 | SH2D4A   | 566  | 593  | 6.65846341566     |
| NM_001174159 | SH2D4A   | 692  | 784  | 6.66248100829     |
| NM_001174159 | SH2D4A   | 1461 | 1513 | 6.65846341566     |
| NM_001174159 | SH2D4A   | 76   | 176  | 6.66248101561     |
| NM_001174159 | SH2D4A   | 1308 | 1416 | 7.24744351656     |
| NM_033211    | C5orf30  | 881  | 974  | 9.56919786112     |
| NM_001144994 | C2orf72  | 442  | 508  | 8.11203270878     |
| NM_001144994 | C2orf72  | 1954 | 2020 | 8.112032709       |
| NM_001144994 | C2orf72  | 694  | 746  | 8.11203270899     |
| NM_001144994 | C2orf72  | 1487 | 1523 | 8.11203247308     |
| NM_001144994 | C2orf72  | 3479 | 3525 | 8.11203270899     |
| NM_001144994 | C2orf72  | 2451 | 2502 | 8.6969949738      |
| NM_001144994 | C2orf72  | 1528 | 1569 | 7.02789349962     |
| NM_001144994 | C2orf72  | 2091 | 2164 | 7.11203270145     |
| NM_001144994 | C2orf72  | 2698 | 2739 | 8.10801510883     |
| NM_001144994 | C2orf72  | 782  | 943  | 10.2819577104     |
| NM_001144994 | C2orf72  | 2584 | 2654 | 8.11202597795     |
| NM_001144994 | C2orf72  | 1097 | 1214 | 9.43396080389     |
| NM_001144994 | C2orf72  | 1655 | 1827 | 8.112032709       |
| NM_001144995 | CCDC85C  | 4836 | 4887 | 5.29013350811     |
| NM_001144995 | CCDC85C  | 2591 | 2641 | 6.29014023916     |
| NM_001144995 | CCDC85C  | 4043 | 4150 | 5.29013350811     |
| NM_001144995 | CCDC85C  | 3942 | 4005 | 5.29014023916     |
| NM_001144995 | CCDC85C  | 2676 | 2763 | 8.29014023916     |
| NM_001144995 | CCDC85C  | 2517 | 2589 | 6.7909635305      |
| NM_001144995 | CCDC85C  | 3736 | 3784 | 6.29014000324     |
| NM_001144995 | CCDC85C  | 1768 | 1825 | 7.29014000324     |
| NM_001144995 | CCDC85C  | 4228 | 4328 | 6.87510273988     |
| NM_001144995 | CCDC85C  | 863  | 900  | 6.87509600883     |
| NM_001144995 | CCDC85C  | 639  | 715  | 6.29014000324     |
| NM_001144995 | CCDC85C  | 4478 | 4657 | 7.29014023916     |

|              |            |      |      |                   |
|--------------|------------|------|------|-------------------|
| NM_001144995 | CCDC85C    | 1463 | 1571 | 6.29014023916     |
| NM_001144995 | CCDC85C    | 3098 | 3227 | 5.29014023916     |
| NM_001144995 | CCDC85C    | 2931 | 3066 | 5.29014023916     |
| NM_001025300 | RAB12      | 1393 | 1440 | 3.95828653298     |
| NM_001025300 | RAB12      | 1940 | 2006 | 4.54342278402     |
| NM_001025300 | RAB12      | 1815 | 1901 | 2.95845355224     |
| NM_021908    | ST7        | 2315 | 2362 | 7.5217748493      |
| NM_021908    | ST7        | 2412 | 2525 | 7.5219483637      |
| NM_021908    | ST7        | 1569 | 1651 | 9.10691110033     |
| NM_021908    | ST7        | 1425 | 1458 | 9.02277189095     |
| NM_021908    | ST7        | 735  | 793  | 8.52194186856     |
| NM_021908    | ST7        | 322  | 385  | 9.10690436928     |
| NM_021908    | ST7        | 235  | 312  | 10.6918736011     |
| NM_021908    | ST7        | 922  | 973  | 7.52194186856     |
| NM_021908    | ST7        | 538  | 692  | 10.6918736011     |
| NM_018375    | SLC39A9    | 1361 | 1414 | 8.42722700959     |
| NM_018375    | SLC39A9    | 3450 | 3503 | 10.0121895105     |
| NM_018375    | SLC39A9    | 3197 | 3231 | 8.34308780043     |
| NM_018375    | SLC39A9    | 1259 | 1337 | 10.7491551047     |
| NM_018375    | SLC39A9    | 3735 | 3795 | 10.4272270098     |
| NM_018375    | SLC39A9    | 2825 | 2904 | 10.0121895105     |
| NM_018375    | SLC39A9    | 339  | 385  | 9.42320940964     |
| NM_018375    | SLC39A9    | 661  | 708  | 10.0121892746     |
| NM_018375    | SLC39A9    | 2018 | 2089 | 9.42320940964     |
| NM_018375    | SLC39A9    | 3565 | 3614 | 8.34308780043     |
| NM_018375    | SLC39A9    | 5219 | 5272 | 10.7491551047     |
| NM_018375    | SLC39A9    | 112  | 260  | 10.0121895105     |
| NM_018375    | SLC39A9    | 4876 | 4950 | 10.7491548688     |
| NM_018375    | SLC39A9    | 708  | 885  | 12.2345819319     |
| NM_018375    | SLC39A9    | 2486 | 2549 | 10.4272270096     |
| NM_018375    | SLC39A9    | 5072 | 5167 | 10.012189503      |
| NM_018375    | SLC39A9    | 1019 | 1138 | 11.2345819319     |
| NM_018375    | SLC39A9    | 4988 | 5055 | 10.012189503      |
| NM_018375    | SLC39A9    | 4516 | 4572 | 8.34308780043     |
| NM_018375    | SLC39A9    | 386  | 503  | 12.0121895105     |
| NM_018375    | SLC39A9    | 4244 | 4328 | 8.42320940964     |
| NM_018375    | SLC39A9    | 2744 | 2821 | 10.0121895105     |
| NM_152434    | CWF19L2    | 2246 | 2318 | 6.19673463732     |
| NM_006803    | AP3M2      | 3061 | 3121 | 10.1432777635     |
| NM_052850    | GADD45GIP1 |      | 262  | 333 4.45640042413 |
| NM_052850    | GADD45GIP1 |      | 404  | 478 4.45640041658 |
| NM_052850    | GADD45GIP1 |      | 549  | 612 3.37226121474 |
| NM_018129    | PNPO       | 3297 | 3346 | 9.05016835911     |
| NM_018129    | PNPO       | 1043 | 1170 | 9.46922345856     |
| NM_018129    | PNPO       | 1694 | 1783 | 7.46922345856     |
| NM_018129    | PNPO       | 334  | 410  | 7.38508424917     |
| NM_018128    | TSR1       | 2283 | 2401 | 6.98908393475     |
| NM_018128    | TSR1       | 2158 | 2192 | 4.58301663048     |
| NM_018128    | TSR1       | 2520 | 2592 | 6.66715583964     |
| NM_018128    | TSR1       | 1747 | 1843 | 7.25211834058     |



|              |        |      |      |               |
|--------------|--------|------|------|---------------|
| NM_018128    | TSR1   | 2735 | 2791 | 6.25211834058 |
| NM_018128    | TSR1   | 1416 | 1525 | 6.98908393475 |
| NM_018128    | TSR1   | 1077 | 1143 | 4.66313823969 |
| NM_018128    | TSR1   | 2597 | 2655 | 4.66698208954 |
| NM_018128    | TSR1   | 3361 | 3445 | 6.25211834058 |
| NM_018128    | TSR1   | 1626 | 1711 | 4.58301663048 |
| NM_018128    | TSR1   | 4294 | 4341 | 4.66714910881 |
| NM_018128    | TSR1   | 2069 | 2127 | 6.58301663048 |
| NM_018128    | TSR1   | 2801 | 2908 | 7.47451076192 |
| NM_018128    | TSR1   | 1902 | 2017 | 6.25211834058 |
| NM_018128    | TSR1   | 2425 | 2501 | 6.66715583986 |
| NM_018128    | TSR1   | 3036 | 3321 | 7.25211834058 |
| NM_001145358 | SIN3A  | 3591 | 3649 | 6.19764655515 |
| NM_001145358 | SIN3A  | 1904 | 1970 | 6.11368109608 |
| NM_001145358 | SIN3A  | 5034 | 5088 | 5.19380270529 |
| NM_001145358 | SIN3A  | 4662 | 4745 | 5.19781357441 |
| NM_001145358 | SIN3A  | 2693 | 2746 | 6.19380270529 |
| NM_001145358 | SIN3A  | 1768 | 1874 | 6.78278280618 |
| NM_001145358 | SIN3A  | 4847 | 4937 | 6.19782030524 |
| NM_018124    | RFWD3  | 2058 | 2152 | 6.96106838674 |
| NM_018124    | RFWD3  | 2277 | 2362 | 7.54585713714 |
| NM_018124    | RFWD3  | 1279 | 1344 | 5.95705078657 |
| NM_018124    | RFWD3  | 1577 | 1634 | 5.96106165569 |
| NM_018124    | RFWD3  | 1707 | 1757 | 7.54585713714 |
| NM_018124    | RFWD3  | 2708 | 2766 | 7.54602415641 |
| NM_018124    | RFWD3  | 1095 | 1169 | 7.54603087991 |
| NM_018124    | RFWD3  | 772  | 871  | 6.96106815082 |
| NM_018127    | ELAC2  | 1729 | 1817 | 10.2229211974 |
| NM_018127    | ELAC2  | 1175 | 1251 | 8.90099310253 |
| NM_018127    | ELAC2  | 924  | 1056 | 11.2229211974 |
| NM_018127    | ELAC2  | 570  | 652  | 9.90099310253 |
| NM_018127    | ELAC2  | 505  | 566  | 7.90099310253 |
| NM_018127    | ELAC2  | 1639 | 1720 | 8.90099309498 |
| NM_018127    | ELAC2  | 1257 | 1339 | 9.90099310253 |
| NM_018127    | ELAC2  | 2685 | 2752 | 9.48595560325 |
| NM_018127    | ELAC2  | 2577 | 2641 | 9.48193800308 |
| NM_018127    | ELAC2  | 1995 | 2163 | 9.48595560325 |
| NM_018127    | ELAC2  | 323  | 499  | 11.2229211974 |
| NM_018127    | ELAC2  | 2846 | 2914 | 7.90099310253 |
| NM_018126    | TMEM33 | 7246 | 7306 | 7.77966578332 |
| NM_018126    | TMEM33 | 2378 | 2423 | 9.77983929772 |
| NM_018126    | TMEM33 | 5782 | 5847 | 7.77983953341 |
| NM_018126    | TMEM33 | 7436 | 7507 | 8.77983280258 |
| NM_018126    | TMEM33 | 2898 | 2999 | 8.77983953364 |
| NM_018126    | TMEM33 | 5436 | 5507 | 9.36480203436 |
| NM_018126    | TMEM33 | 6955 | 6999 | 9.28066282497 |
| NM_018126    | TMEM33 | 5087 | 5202 | 8.77983953364 |
| NM_018126    | TMEM33 | 4913 | 5039 | 9.77983953364 |
| NM_018126    | TMEM33 | 3235 | 3298 | 9.36480203436 |
| NM_018126    | TMEM33 | 7379 | 7413 | 8.77582193346 |

|              |         |      |      |               |
|--------------|---------|------|------|---------------|
| NM_018126    | TMEM33  | 4236 | 4294 | 7.77582193346 |
| NM_018126    | TMEM33  | 1357 | 1384 | 8.69570032425 |
| NM_018126    | TMEM33  | 2000 | 2061 | 9.36480203436 |
| NM_018126    | TMEM33  | 6228 | 6313 | 8.77983953364 |
| NM_018126    | TMEM33  | 2211 | 2332 | 8.77983953364 |
| NM_018126    | TMEM33  | 3353 | 3500 | 12.0277670471 |
| NM_018126    | TMEM33  | 269  | 1127 | 15.1807189699 |
| NM_018126    | TMEM33  | 1410 | 1539 | 10.1017676285 |
| NM_018126    | TMEM33  | 6630 | 6704 | 7.77983952609 |
| NM_018126    | TMEM33  | 1863 | 1979 | 10.7798395336 |
| NM_018126    | TMEM33  | 6083 | 6178 | 10.1017676285 |
| NM_018126    | TMEM33  | 1141 | 1355 | 12.4236957234 |
| NM_018126    | TMEM33  | 3737 | 3815 | 7.77983929772 |
| NM_018126    | TMEM33  | 3077 | 3164 | 8.77983953364 |
| NM_018126    | TMEM33  | 1590 | 1731 | 10.9497645351 |
| NM_018126    | TMEM33  | 6454 | 6614 | 10.7798395336 |
| NM_018126    | TMEM33  | 67   | 267  | 11.6867301292 |
| NM_018126    | TMEM33  | 5521 | 5621 | 9.36480203436 |
| NM_001145353 | ELF1    | 1281 | 1351 | 7.42279935753 |
| NM_001145353 | ELF1    | 2065 | 2092 | 5.83783012575 |
| NM_001145353 | ELF1    | 150  | 253  | 9.00776185825 |
| NM_001145353 | ELF1    | 1175 | 1252 | 6.83783684926 |
| NM_001145353 | ELF1    | 2643 | 2684 | 6.75369764742 |
| NM_001145353 | ELF1    | 1968 | 2044 | 5.83783685681 |
| NM_001145353 | ELF1    | 1843 | 1915 | 7.83783685681 |
| NM_001145353 | ELF1    | 1390 | 1467 | 6.83783662089 |
| NM_001145353 | ELF1    | 32   | 101  | 6.83783012575 |
| NM_001145353 | ELF1    | 474  | 539  | 7.42262560721 |
| NM_001145353 | ELF1    | 2143 | 2202 | 6.83783662089 |
| NM_001145353 | ELF1    | 261  | 470  | 10.1597649517 |
| NM_001145353 | ELF1    | 913  | 1009 | 6.83783685681 |
| NM_018120    | ARMC1   | 953  | 1003 | 6.78011086326 |
| NM_018120    | ARMC1   | 1091 | 1143 | 5.69998925405 |
| NM_018120    | ARMC1   | 1764 | 1887 | 7.78412846343 |
| NM_018122    | DARS2   | 445  | 479  | 6.75616206743 |
| NM_018122    | DARS2   | 1972 | 2030 | 8.42526377753 |
| NM_018122    | DARS2   | 123  | 170  | 7.83628367664 |
| NM_018122    | DARS2   | 1061 | 1132 | 6.84029454576 |
| NM_018122    | DARS2   | 2390 | 2442 | 6.8401275265  |
| NM_018122    | DARS2   | 1414 | 1455 | 6.75616206743 |
| NM_018122    | DARS2   | 267  | 312  | 7.75616206743 |
| NM_018122    | DARS2   | 1714 | 1755 | 6.83628367664 |
| NM_018122    | DARS2   | 490  | 566  | 8.42526377753 |
| NM_018122    | DARS2   | 884  | 1030 | 9.1622293717  |
| NM_018122    | DARS2   | 1488 | 1610 | 9.1622293717  |
| NM_018122    | DARS2   | 634  | 807  | 8.84030127681 |
| NM_018373    | SYNJ2BP | 5003 | 5060 | 8.86807399755 |
| NM_018373    | SYNJ2BP | 519  | 595  | 8.87209159018 |
| NM_018373    | SYNJ2BP | 6192 | 6251 | 7.87208486667 |
| NM_018373    | SYNJ2BP | 3093 | 3163 | 9.87208486667 |

|              |          |      |      |                 |               |
|--------------|----------|------|------|-----------------|---------------|
| NM_018373    | SYNJ2BP  | 3684 | 3753 | 8.87191784741   |               |
| NM_001030009 | RPS15A   | 14   | 78   | -0.201174002411 |               |
| NM_001030009 | RPS15A   | 433  | 472  | -2.20134775273  |               |
| NM_001030009 | RPS15A   | 107  | 424  | 2.19114342037   |               |
| NM_014828    | TOX4     | 1990 | 2037 | 5.63062756508   |               |
| NM_014828    | TOX4     | 523  | 554  | 7.13546845659   |               |
| NM_014828    | TOX4     | 1839 | 1888 | 5.55050595587   |               |
| NM_014828    | TOX4     | 2126 | 2179 | 5.63062756508   |               |
| NM_014828    | TOX4     | 1718 | 1801 | 7.63464516525   |               |
| NM_014828    | TOX4     | 110  | 173  | 6.6346384342    |               |
| NM_014828    | TOX4     | 914  | 974  | 6.6346384342    |               |
| NM_014828    | TOX4     | 214  | 304  | 7.95657326014   |               |
| NM_014828    | TOX4     | 3050 | 3146 | 6.63464516525   |               |
| NM_014829    | DDX46    | 1503 | 1563 | 4.73520618059   |               |
| NM_014829    | DDX46    | 2383 | 2437 | 4.73922378054   |               |
| NM_014829    | DDX46    | 1729 | 1783 | 4.73922378076   |               |
| NM_014829    | DDX46    | 3374 | 3423 | 3.65508457138   |               |
| NM_014829    | DDX46    | 2014 | 2091 | 6.06115187565   |               |
| NM_014829    | DDX46    | 3476 | 3536 | 4.73922377322   |               |
| NM_014829    | DDX46    | 1566 | 1619 | 3.73921704971   |               |
| NM_014829    | DDX46    | 1065 | 1163 | 5.32418604557   |               |
| NM_014829    | DDX46    | 1927 | 2001 | 4.73922378076   |               |
| NM_014829    | DDX46    | 1662 | 1725 | 5.32016868131   |               |
| NM_014829    | DDX46    | 2252 | 2354 | 3.73922378076   |               |
| NM_014829    | DDX46    | 2915 | 3009 | 3.73922378076   |               |
| NM_014825    | URB1     | 262  | 328  | 9.29206824211   |               |
| NM_014825    | URB1     | 2506 | 2568 | 8.29206824966   |               |
| NM_014825    | URB1     | 4273 | 4314 | 8.28805064949   |               |
| NM_014825    | URB1     | 3335 | 3372 | 8.87301315021   |               |
| NM_014826    | CDC42BPA |      | 3974 | 4023            | 8.37290973715 |
| NM_014826    | CDC42BPA |      | 3766 | 3814            | 6.05098164226 |
| NM_014826    | CDC42BPA |      | 221  | 252             | 7.04697077314 |
| NM_014826    | CDC42BPA |      | 2066 | 2130            | 7.04697077314 |
| NM_014826    | CDC42BPA |      | 4469 | 4519            | 6.96684916393 |
| NM_014826    | CDC42BPA |      | 927  | 1024            | 6.04697077314 |
| NM_014826    | CDC42BPA |      | 470  | 542             | 6.04697077314 |
| NM_014826    | CDC42BPA |      | 4182 | 4238            | 6.04697077314 |
| NM_014827    | ZC3H11A  | 2859 | 2911 | 5.86068960784   |               |
| NM_014827    | ZC3H11A  | 2966 | 3027 | 5.86068960784   |               |
| NM_014827    | ZC3H11A  | 3343 | 3372 | 4.86068937193   |               |
| NM_014827    | ZC3H11A  | 1726 | 1792 | 6.86068960784   |               |
| NM_014827    | ZC3H11A  | 3766 | 3821 | 6.44565210857   |               |
| NM_014827    | ZC3H11A  | 997  | 1062 | 4.86068960784   |               |
| NM_014827    | ZC3H11A  | 850  | 910  | 6.44547835825   |               |
| NM_014827    | ZC3H11A  | 1229 | 1268 | 4.85667200767   |               |
| NM_014827    | ZC3H11A  | 1658 | 1692 | 4.77655039846   |               |
| NM_014827    | ZC3H11A  | 3164 | 3231 | 4.86068937193   |               |
| NM_014827    | ZC3H11A  | 3270 | 3333 | 4.86068960784   |               |
| NM_014827    | ZC3H11A  | 161  | 222  | 6.44547835825   |               |
| NM_014827    | ZC3H11A  | 2006 | 2099 | 5.86068960784   |               |

|              |         |      |      |               |
|--------------|---------|------|------|---------------|
| NM_014827    | ZC3H11A | 622  | 751  | 6.86068960784 |
| NM_014827    | ZC3H11A | 3382 | 3497 | 8.03061460929 |
| NM_014827    | ZC3H11A | 1080 | 1139 | 7.44565210857 |
| NM_014827    | ZC3H11A | 4390 | 4505 | 7.18261770273 |
| NM_014827    | ZC3H11A | 3029 | 3127 | 7.6680445299  |
| NM_014827    | ZC3H11A | 227  | 350  | 7.18261770273 |
| NM_014827    | ZC3H11A | 1808 | 1904 | 7.18261770273 |
| NM_014827    | ZC3H11A | 3992 | 4054 | 4.86068287679 |
| NM_014827    | ZC3H11A | 1139 | 1220 | 4.86068960762 |
| NM_014827    | ZC3H11A | 3564 | 3688 | 7.44565210857 |
| NM_014827    | ZC3H11A | 1376 | 1488 | 7.86068960784 |
| NM_014827    | ZC3H11A | 45   | 155  | 6.44565210857 |
| NM_014827    | ZC3H11A | 4204 | 4334 | 7.44565210857 |
| NM_014827    | ZC3H11A | 2147 | 2233 | 4.86068960784 |
| NM_014827    | ZC3H11A | 2716 | 2795 | 6.44565210857 |
| NM_014820    | TOMM70A | 1256 | 1324 | 5.45290289485 |
| NM_014820    | TOMM70A | 357  | 432  | 6.2740076984  |
| NM_014820    | TOMM70A | 4251 | 4327 | 5.95207960351 |
| NM_014820    | TOMM70A | 4097 | 4180 | 3.94806200334 |
| NM_014820    | TOMM70A | 1615 | 1659 | 4.95207959596 |
| NM_014820    | TOMM70A | 3175 | 3260 | 6.2740076984  |
| NM_014820    | TOMM70A | 269  | 352  | 6.2740076984  |
| NM_014820    | TOMM70A | 1983 | 2074 | 6.2740076984  |
| NM_014820    | TOMM70A | 913  | 1042 | 6.2740076984  |
| NM_014820    | TOMM70A | 1706 | 1821 | 4.95207960351 |
| NM_014820    | TOMM70A | 2349 | 2475 | 6.2740076984  |
| NM_014820    | TOMM70A | 1053 | 1215 | 7.12200460496 |
| NM_014822    | SEC24D  | 724  | 754  | 6.68247870142 |
| NM_014822    | SEC24D  | 3286 | 3357 | 8.26744120214 |
| NM_014822    | SEC24D  | 2596 | 2645 | 7.68247870142 |
| NM_014822    | SEC24D  | 1064 | 1112 | 6.60235709221 |
| NM_014822    | SEC24D  | 3496 | 3532 | 6.68649630158 |
| NM_014822    | SEC24D  | 2812 | 2872 | 8.27145207126 |
| NM_014822    | SEC24D  | 1379 | 1444 | 6.68632255127 |
| NM_014822    | SEC24D  | 344  | 387  | 6.68247870142 |
| NM_014822    | SEC24D  | 1619 | 1679 | 7.68648957054 |
| NM_014822    | SEC24D  | 1764 | 1863 | 8.68649606567 |
| NM_014822    | SEC24D  | 569  | 634  | 8.27128505199 |
| NM_014822    | SEC24D  | 2111 | 2255 | 9.85642130303 |
| NM_001030007 | AP1G1   | 3569 | 3607 | 6.04613160383 |
| NM_001030007 | AP1G1   | 5633 | 5715 | 7.63126785486 |
| NM_001030007 | AP1G1   | 1969 | 2034 | 6.04630534659 |
| NM_001030007 | AP1G1   | 1597 | 1649 | 6.04629862309 |
| NM_001030007 | AP1G1   | 801  | 849  | 6.63126112381 |
| NM_001030007 | AP1G1   | 4532 | 4577 | 6.04228775397 |
| NM_001030007 | AP1G1   | 2096 | 2144 | 6.04630534659 |
| NM_001030007 | AP1G1   | 1904 | 1960 | 6.04629862309 |
| NM_001030007 | AP1G1   | 1507 | 1548 | 7.04630535414 |
| NM_001030007 | AP1G1   | 6005 | 6070 | 5.04228775397 |
| NM_001030007 | AP1G1   | 1033 | 1134 | 7.36823344903 |

|              |         |      |      |               |
|--------------|---------|------|------|---------------|
| NM_001030007 | AP1G1   | 3897 | 3947 | 6.04228775397 |
| NM_001030007 | AP1G1   | 6122 | 6177 | 6.04228775397 |
| NM_001030007 | AP1G1   | 1449 | 1502 | 7.04228775397 |
| NM_001030007 | AP1G1   | 6574 | 6633 | 5.04629862309 |
| NM_001030007 | AP1G1   | 2952 | 3035 | 7.04613160383 |
| NM_001030007 | AP1G1   | 2452 | 2510 | 6.04228775397 |
| NM_001030007 | AP1G1   | 4909 | 4937 | 6.04228775397 |
| NM_001030007 | AP1G1   | 883  | 922  | 5.04613160383 |
| NM_001030007 | AP1G1   | 6737 | 6799 | 5.04613160383 |
| NM_001030007 | AP1G1   | 445  | 494  | 7.04629862309 |
| NM_001030007 | AP1G1   | 1709 | 1804 | 7.36823344881 |
| NM_001030007 | AP1G1   | 4658 | 4764 | 5.04630535392 |
| NM_001030007 | AP1G1   | 3254 | 3327 | 6.04630534659 |
| NM_001030007 | AP1G1   | 2241 | 2312 | 6.04630535414 |
| NM_001030007 | AP1G1   | 3430 | 3554 | 6.63126785486 |
| NM_001030007 | AP1G1   | 668  | 759  | 5.04630534659 |
| NM_001030007 | AP1G1   | 1188 | 1360 | 8.50573697278 |
| NM_001030007 | AP1G1   | 577  | 632  | 6.63109410455 |
| NM_005334    | HCFC1   | 6725 | 6792 | 10.3192982534 |
| NM_005334    | HCFC1   | 627  | 724  | 9.58233265928 |
| NM_005334    | HCFC1   | 7383 | 7448 | 9.99737015856 |
| NM_005334    | HCFC1   | 3662 | 3740 | 9.99737015856 |
| NM_005334    | HCFC1   | 2248 | 2291 | 7.99335255839 |
| NM_005334    | HCFC1   | 4805 | 4878 | 7.99335255839 |
| NM_005334    | HCFC1   | 780  | 840  | 9.58233265173 |
| NM_005334    | HCFC1   | 2623 | 2675 | 8.99737015101 |
| NM_005334    | HCFC1   | 1724 | 1796 | 7.99737015101 |
| NM_005334    | HCFC1   | 6513 | 6610 | 8.99737015834 |
| NM_005334    | HCFC1   | 2349 | 2399 | 8.91323094918 |
| NM_005334    | HCFC1   | 2912 | 2982 | 7.99335255839 |
| NM_005334    | HCFC1   | 6255 | 6310 | 8.99737015101 |
| NM_005334    | HCFC1   | 93   | 142  | 7.99719640824 |
| NM_005334    | HCFC1   | 5190 | 5240 | 8.99335255839 |
| NM_005334    | HCFC1   | 2116 | 2146 | 7.91323094918 |
| NM_005334    | HCFC1   | 1206 | 1271 | 7.99737015101 |
| NM_005334    | HCFC1   | 7489 | 7588 | 10.5823326593 |
| NM_005334    | HCFC1   | 8188 | 8365 | 11.5823326593 |
| NM_005334    | HCFC1   | 7051 | 7163 | 10.5823326593 |
| NM_005334    | HCFC1   | 1966 | 2009 | 7.99335255839 |
| NM_005334    | HCFC1   | 5946 | 5989 | 7.99719640824 |
| NM_005334    | HCFC1   | 843  | 958  | 8.99737015856 |
| NM_005334    | HCFC1   | 998  | 1088 | 7.99737015856 |
| NM_005334    | HCFC1   | 432  | 560  | 10.5823326593 |
| NM_005334    | HCFC1   | 3441 | 3613 | 10.9973701586 |
| NM_005334    | HCFC1   | 1359 | 1520 | 10.3192982534 |
| NM_005334    | HCFC1   | 4958 | 5026 | 9.57831505911 |
| NM_152783    | D2HGDH  | 687  | 773  | 8.87124680852 |
| NM_152783    | D2HGDH  | 1427 | 1487 | 7.28226671517 |
| NM_032299    | DCUN1D5 | 220  | 268  | 5.19465610219 |
| NM_032299    | DCUN1D5 | 1226 | 1257 | 5.19063850202 |

|           |         |      |      |               |
|-----------|---------|------|------|---------------|
| NM_032299 | DCUN1D5 | 442  | 519  | 5.19465586628 |
| NM_152787 | TAB3    | 3395 | 3449 | 5.04889936884 |
| NM_152787 | TAB3    | 277  | 330  | 6.6336948503  |
| NM_152787 | TAB3    | 4690 | 4767 | 7.04890609968 |
| NM_152787 | TAB3    | 684  | 727  | 5.96476689051 |
| NM_152787 | TAB3    | 6162 | 6263 | 6.0489060999  |
| NM_152787 | TAB3    | 502  | 610  | 7.63386860062 |
| NM_152789 | FAM133B | 1010 | 1071 | 3.08113383107 |
| NM_152789 | FAM133B | 2130 | 2166 | 3.00101222186 |
| NM_152789 | FAM133B | 1083 | 1145 | 4.66609633179 |
| NM_152789 | FAM133B | 1814 | 1854 | 3.00101222186 |
| NM_005338 | HIP1    | 6479 | 6534 | 6.92706582281 |
| NM_005338 | HIP1    | 2099 | 2139 | 6.92706582281 |
| NM_005338 | HIP1    | 4788 | 4835 | 9.00718743202 |
| NM_005338 | HIP1    | 4216 | 4286 | 6.92706582281 |
| NM_005338 | HIP1    | 613  | 690  | 8.596167297   |
| NM_005338 | HIP1    | 3621 | 3686 | 7.00718743202 |
| NM_005338 | HIP1    | 1226 | 1265 | 6.92706582281 |
| NM_005338 | HIP1    | 2627 | 2693 | 8.59616080186 |
| NM_005338 | HIP1    | 274  | 370  | 9.33313312686 |
| NM_005338 | HIP1    | 2912 | 3046 | 9.01120503219 |
| NM_005339 | UBE2K   | 4662 | 4735 | 4.63378208684 |
| NM_005339 | UBE2K   | 1564 | 1640 | 6.95571018173 |
| NM_005339 | UBE2K   | 131  | 207  | 6.21874458756 |
| NM_005339 | UBE2K   | 1006 | 1059 | 5.63378208684 |
| NM_005339 | UBE2K   | 3534 | 3579 | 4.62976448667 |
| NM_005339 | UBE2K   | 3789 | 3841 | 5.63378185092 |
| NM_005339 | UBE2K   | 1097 | 1145 | 5.54964287746 |
| NM_005339 | UBE2K   | 1449 | 1496 | 4.63360833652 |
| NM_005339 | UBE2K   | 5091 | 5142 | 4.62976448667 |
| NM_005339 | UBE2K   | 2855 | 2918 | 5.63378208684 |
| NM_005339 | UBE2K   | 251  | 310  | 5.63378208684 |
| NM_005339 | UBE2K   | 1185 | 1232 | 6.95571017418 |
| NM_005339 | UBE2K   | 321  | 461  | 7.80370708829 |
| NM_005339 | UBE2K   | 708  | 747  | 5.63378185092 |
| NM_005339 | UBE2K   | 2204 | 2285 | 6.63378208684 |
| NM_005339 | UBE2K   | 2335 | 2378 | 4.54964287746 |
| NM_005339 | UBE2K   | 4866 | 5037 | 7.80370708829 |
| NM_005339 | UBE2K   | 4514 | 4622 | 6.95571018173 |
| NM_005339 | UBE2K   | 1233 | 1380 | 7.80370708829 |
| NM_005339 | UBE2K   | 2704 | 2771 | 5.63360833652 |
| NM_005339 | UBE2K   | 521  | 683  | 8.21874458756 |
| NM_005339 | UBE2K   | 781  | 977  | 9.09321370548 |
| NM_005339 | UBE2K   | 4054 | 4118 | 5.63378207929 |
| NM_015192 | PLCB1   | 6843 | 6887 | 5.22559997844 |
| NM_015192 | PLCB1   | 505  | 565  | 4.64081122804 |
| NM_015192 | PLCB1   | 2443 | 2517 | 3.64081122803 |
| NM_015192 | PLCB1   | 2706 | 2744 | 3.55667201866 |
| NM_015192 | PLCB1   | 688  | 766  | 5.22577372876 |
| NM_015192 | PLCB1   | 6549 | 6628 | 4.64081122049 |

|              |        |      |      |                |
|--------------|--------|------|------|----------------|
| NM_015192    | PLCB1  | 466  | 505  | 3.55667201866  |
| NM_015192    | PLCB1  | 1380 | 1531 | 4.64081122804  |
| NM_015191    | SIK2   | 2419 | 2470 | 8.66708897608  |
| NM_015191    | SIK2   | 388  | 506  | 7.6710998452   |
| NM_015191    | SIK2   | 1720 | 1792 | 8.58696736687  |
| NM_015191    | SIK2   | 745  | 847  | 9.25606907697  |
| NM_015190    | DNAJC9 | 393  | 465  | 5.27144985642  |
| NM_015190    | DNAJC9 | 472  | 563  | 5.68648712733  |
| NM_015190    | DNAJC9 | 746  | 793  | 3.68246976308  |
| NM_015190    | DNAJC9 | 1121 | 1249 | 7.14591898189  |
| NM_015190    | DNAJC9 | 568  | 605  | 4.60234815387  |
| NM_015190    | DNAJC9 | 299  | 382  | 5.68648736325  |
| NM_015190    | DNAJC9 | 962  | 1087 | 6.49384228531  |
| NM_015194    | MY01D  | 2521 | 2582 | 6.60706881282  |
| NM_015194    | MY01D  | 3180 | 3243 | 7.61108641299  |
| NM_015194    | MY01D  | 1315 | 1361 | 7.61108641299  |
| NM_015194    | MY01D  | 569  | 598  | 5.5269472036   |
| NM_015194    | MY01D  | 1970 | 2042 | 8.19604891371  |
| NM_015194    | MY01D  | 2059 | 2126 | 6.61107968193  |
| NM_015194    | MY01D  | 1534 | 1572 | 7.19587516339  |
| NM_015194    | MY01D  | 2816 | 2869 | 7.19203131354  |
| NM_015194    | MY01D  | 2689 | 2751 | 7.19604891371  |
| NM_015194    | MY01D  | 1681 | 1780 | 7.61108641299  |
| NM_015194    | MY01D  | 1623 | 1666 | 5.61107968193  |
| NM_015194    | MY01D  | 3727 | 3833 | 6.61108641298  |
| NM_015194    | MY01D  | 251  | 287  | 7.5269472036   |
| NM_015194    | MY01D  | 697  | 761  | 7.19587516339  |
| NM_015194    | MY01D  | 119  | 208  | 8.19604891371  |
| NM_015194    | MY01D  | 4646 | 4691 | 6.60706881282  |
| NM_015194    | MY01D  | 1051 | 1151 | 8.19604891371  |
| NM_015194    | MY01D  | 1802 | 1890 | 8.19604891371  |
| NM_015198    | COBL   | 2424 | 2479 | 8.4320906255   |
| NM_015198    | COBL   | 2332 | 2413 | 8.43209085387  |
| NM_015198    | COBL   | 3499 | 3594 | 7.84712835315  |
| NM_015198    | COBL   | 3120 | 3172 | 8.4319171111   |
| NM_015198    | COBL   | 1460 | 1523 | 6.84311076053  |
| NM_015198    | COBL   | 677  | 712  | 7.84695461038  |
| NM_015198    | COBL   | 4221 | 4270 | 6.84311076053  |
| NM_015198    | COBL   | 4168 | 4218 | 8.34795165204  |
| NM_015198    | COBL   | 2103 | 2172 | 7.84712836048  |
| NM_015198    | COBL   | 4276 | 4371 | 8.43209086141  |
| NM_015198    | COBL   | 4843 | 4902 | 6.84311076053  |
| NM_015198    | COBL   | 380  | 533  | 9.43209086142  |
| NM_015198    | COBL   | 540  | 596  | 8.43209085387  |
| NM_015198    | COBL   | 1656 | 1713 | 6.84311076053  |
| NM_001177413 | RPS27A | 40   | 121  | 0.682857321357 |
| NM_001177413 | RPS27A | 144  | 645  | 4.09224825749  |
| NM_012176    | FBX04  | 1164 | 1209 | 7.77383354561  |
| NM_012177    | FBX05  | 503  | 550  | 6.69077206741  |
| NM_012177    | FBX05  | 1270 | 1337 | 5.69077206741  |

|              |        |      |      |               |
|--------------|--------|------|------|---------------|
| NM_012170    | FBX022 | 436  | 504  | 7.77519511038 |
| NM_001004333 | RNASEK | 251  | 300  | 8.91613098173 |
| NM_001004333 | RNASEK | 522  | 567  | 6.33116174995 |
| NM_001004333 | RNASEK | 646  | 754  | 8.6530965759  |
| NM_001004333 | RNASEK | 305  | 519  | 10.5010934825 |
| NM_012173    | FBX025 | 253  | 362  | 9.44747658025 |
| NM_004087    | DLG1   | 2075 | 2160 | 4.93027274821 |
| NM_004087    | DLG1   | 440  | 529  | 6.5154089917  |
| NM_004087    | DLG1   | 4212 | 4268 | 6.51540899925 |
| NM_004087    | DLG1   | 1422 | 1487 | 6.51540899903 |
| NM_004087    | DLG1   | 1958 | 2025 | 6.93044649853 |
| NM_004087    | DLG1   | 3062 | 3128 | 7.25237459342 |
| NM_004087    | DLG1   | 241  | 298  | 4.93043976748 |
| NM_004087    | DLG1   | 1668 | 1768 | 6.51540899925 |
| NM_004087    | DLG1   | 334  | 440  | 4.93044649853 |
| NM_004087    | DLG1   | 2810 | 2932 | 4.93044626261 |
| NM_004738    | VAPB   | 5547 | 5612 | 3.62932370681 |
| NM_004738    | VAPB   | 792  | 869  | 4.71345618514 |
| NM_004738    | VAPB   | 2260 | 2368 | 4.7134629162  |
| NM_004738    | VAPB   | 1013 | 1077 | 3.71345618514 |
| NM_004083    | DDIT3  | 332  | 394  | 5.16249471397 |
| NM_170692    | RASAL2 | 1606 | 1655 | 8.94214801038 |
| NM_170692    | RASAL2 | 2807 | 2862 | 7.93813714126 |
| NM_170693    | SGK2   | 1403 | 1506 | 9.74838758518 |
| NM_170693    | SGK2   | 39   | 102  | 8.74436998501 |
| NM_170693    | SGK2   | 103  | 219  | 10.3333500859 |
| NM_170693    | SGK2   | 1531 | 1617 | 7.74436998501 |
| NM_170693    | SGK2   | 789  | 893  | 8.74838758518 |
| NM_170693    | SGK2   | 657  | 773  | 9.74838758518 |
| NM_170691    | GFM2   | 2300 | 2339 | 5.3229878185  |
| NM_170691    | GFM2   | 2457 | 2514 | 5.31897694939 |
| NM_170691    | GFM2   | 2047 | 2096 | 5.3229878185  |
| NM_170691    | GFM2   | 873  | 977  | 5.3229878185  |
| NM_170691    | GFM2   | 2734 | 2819 | 5.3229878185  |
| NM_170691    | GFM2   | 1545 | 1655 | 6.90795705028 |
| NM_001527    | HDAC2  | 963  | 1004 | 4.0433626803  |
| NM_001527    | HDAC2  | 825  | 900  | 5.26575510164 |
| NM_001527    | HDAC2  | 121  | 170  | 3.45840017957 |
| NM_001527    | HDAC2  | 1842 | 1925 | 4.45840017958 |
| NM_001527    | HDAC2  | 514  | 786  | 6.91783179822 |
| NM_001527    | HDAC2  | 913  | 945  | 2.45438257941 |
| NM_001527    | HDAC2  | 4656 | 4702 | 2.45438257941 |
| NM_001527    | HDAC2  | 1555 | 1738 | 3.45840017958 |
| NM_001527    | HDAC2  | 311  | 443  | 5.62832518102 |
| NM_001527    | HDAC2  | 2037 | 2119 | 4.45839994366 |
| NM_001527    | HDAC2  | 1021 | 1367 | 7.21328768174 |
| NM_001034    | RRM2   | 14   | 86   | 3.89934391998 |
| NM_001034    | RRM2   | 575  | 644  | 4.8953263198  |
| NM_001034    | RRM2   | 1410 | 1447 | 4.81520471059 |
| NM_001034    | RRM2   | 2482 | 2557 | 3.89934391998 |



|           |         |      |      |               |
|-----------|---------|------|------|---------------|
| NM_001034 | RRM2    | 2311 | 2424 | 3.89934391998 |
| NM_001034 | RRM2    | 1355 | 1409 | 3.89933718892 |
| NM_001034 | RRM2    | 1583 | 1632 | 3.8953263198  |
| NM_001034 | RRM2    | 1804 | 1895 | 4.89934391998 |
| NM_001034 | RRM2    | 305  | 538  | 7.4843064207  |
| NM_001034 | RRM2    | 670  | 1025 | 9.10879728561 |
| NM_001034 | RRM2    | 2785 | 2853 | 4.8953263198  |
| NM_001034 | RRM2    | 1074 | 1258 | 7.70669884203 |
| NM_001034 | RRM2    | 1896 | 2029 | 5.89934391998 |
| NM_001031 | RPS28   | 59   | 369  | 6.78967590728 |
| NM_001030 | RPS27   | 13   | 80   | 2.57209989445 |
| NM_001030 | RPS27   | 241  | 324  | 3.30923923893 |
| NM_001030 | RPS27   | 86   | 240  | 5.37962856683 |
| NM_001033 | RRM1    | 1703 | 1781 | 8.11156398372 |
| NM_001033 | RRM1    | 3040 | 3100 | 7.69651975339 |
| NM_001033 | RRM1    | 2290 | 2412 | 9.69652648444 |
| NM_001033 | RRM1    | 1631 | 1702 | 8.11156398372 |
| NM_001033 | RRM1    | 1824 | 1958 | 9.91891890578 |
| NM_001033 | RRM1    | 2595 | 2717 | 9.28148898516 |
| NM_001033 | RRM1    | 2415 | 2574 | 9.28148898516 |
| NM_001033 | RRM1    | 2129 | 2283 | 9.69652648444 |
| NM_001033 | RRM1    | 1284 | 1587 | 10.9695449788 |
| NM_001033 | RRM1    | 142  | 341  | 9.43349207861 |
| NM_001033 | RRM1    | 559  | 1276 | 12.0657602941 |
| NM_001033 | RRM1    | 372  | 559  | 9.81200370186 |
| NM_001033 | RRM1    | 1960 | 2106 | 9.57099560236 |
| NM_001032 | RPS29   | 24   | 304  | 6.06453922328 |
| NM_015030 | FRYL    | 6207 | 6296 | 9.30802126442 |
| NM_015030 | FRYL    | 4290 | 4331 | 7.71921491384 |
| NM_015030 | FRYL    | 5687 | 5748 | 7.71921491384 |
| NM_015030 | FRYL    | 3906 | 3992 | 9.72322578296 |
| NM_015030 | FRYL    | 1014 | 1069 | 7.7232322781  |
| NM_015030 | FRYL    | 817  | 902  | 7.7230587637  |
| NM_015030 | FRYL    | 2348 | 2404 | 7.72323250647 |
| NM_015030 | FRYL    | 8833 | 8865 | 8.71921491384 |
| NM_015030 | FRYL    | 4205 | 4271 | 7.71921491384 |
| NM_015030 | FRYL    | 4010 | 4137 | 10.0451606089 |
| NM_015030 | FRYL    | 3161 | 3263 | 7.72323251401 |
| NM_025258 | C6orf27 | 1924 | 1960 | 11.9423544764 |
| NM_025258 | C6orf27 | 478  | 545  | 12.6114559506 |
| NM_025258 | C6orf27 | 2465 | 2549 | 13.0263199354 |
| NM_025258 | C6orf27 | 1328 | 1375 | 11.0224760856 |
| NM_022340 | ZFYVE20 | 229  | 272  | 7.70141414076 |
| NM_016070 | MRPS23  | 430  | 481  | 3.25765844939 |
| NM_016070 | MRPS23  | 82   | 120  | 3.17351924001 |
| NM_016070 | MRPS23  | 791  | 833  | 4.25364084923 |
| NM_016070 | MRPS23  | 504  | 570  | 5.25765821348 |
| NM_016072 | GOLT1B  | 2415 | 2477 | 8.73065251092 |
| NM_016072 | GOLT1B  | 804  | 856  | 8.40470682341 |
| NM_016072 | GOLT1B  | 2161 | 2212 | 7.40871769253 |

|              |          |      |      |                   |
|--------------|----------|------|------|-------------------|
| NM_016072    | GOLT1B   | 228  | 271  | 6.40872418766     |
| NM_016072    | GOLT1B   | 275  | 320  | 8.40872441603     |
| NM_016072    | GOLT1B   | 980  | 1036 | 7.90954771492     |
| NM_016072    | GOLT1B   | 2300 | 2355 | 6.3245852142      |
| NM_016072    | GOLT1B   | 118  | 228  | 8.40872442358     |
| NM_016072    | GOLT1B   | 365  | 555  | 10.2160793456     |
| NM_022344    | C17orf75 |      | 513  | 594 6.82147728991 |
| NM_018004    | TMEM45A  | 1194 | 1261 | 6.16298902732     |
| NM_018004    | TMEM45A  | 820  | 908  | 8.16298902732     |
| NM_018004    | TMEM45A  | 940  | 976  | 6.07884981793     |
| NM_018004    | TMEM45A  | 1041 | 1100 | 7.66381231865     |
| NM_018004    | TMEM45A  | 566  | 635  | 8.4849171222      |
| NM_022346    | NCAPG    | 2067 | 2150 | 7.49785217085     |
| NM_022346    | NCAPG    | 1555 | 1628 | 6.76071282636     |
| NM_022346    | NCAPG    | 2190 | 2243 | 7.76088657668     |
| NM_022346    | NCAPG    | 1645 | 1749 | 7.17592407596     |
| NM_022346    | NCAPG    | 657  | 688  | 6.75686897651     |
| NM_022346    | NCAPG    | 1867 | 1937 | 5.17591734491     |
| NM_022346    | NCAPG    | 1447 | 1484 | 6.17592407574     |
| NM_022346    | NCAPG    | 1792 | 1826 | 5.17190647579     |
| NM_022346    | NCAPG    | 3396 | 3438 | 6.75686897651     |
| NM_022346    | NCAPG    | 831  | 987  | 8.17592407596     |
| NM_022346    | NCAPG    | 1484 | 1552 | 6.76088657667     |
| NM_022346    | NCAPG    | 743  | 791  | 6.17592384004     |
| NM_022346    | NCAPG    | 3295 | 3387 | 6.17592407596     |
| NM_022346    | NCAPG    | 1941 | 2064 | 8.3458490774      |
| NM_022346    | NCAPG    | 2587 | 2720 | 7.76088657668     |
| NM_022346    | NCAPG    | 1019 | 1176 | 9.26338691721     |
| NM_022346    | NCAPG    | 3094 | 3271 | 6.76088657668     |
| NM_022346    | NCAPG    | 2722 | 2974 | 8.98327899802     |
| NM_022346    | NCAPG    | 2274 | 2583 | 9.69948603202     |
| NM_022346    | NCAPG    | 1186 | 1375 | 8.17592407596     |
| NM_016076    | PPPDE1   | 471  | 562  | 8.4830717575      |
| NM_016076    | PPPDE1   | 3692 | 3745 | 7.48306503399     |
| NM_016079    | CHMP3    | 2370 | 2458 | 3.22054555683     |
| NM_016079    | CHMP3    | 899  | 954  | 4.22456315678     |
| NM_016079    | CHMP3    | 2645 | 2698 | 4.80550805755     |
| NM_016079    | CHMP3    | 2829 | 2943 | 3.22456315678     |
| NM_016079    | CHMP3    | 1063 | 1120 | 4.80951892667     |
| NM_016079    | CHMP3    | 552  | 669  | 5.54649125189     |
| NM_016078    | FAM18B1  | 708  | 764  | 5.53683879321     |
| NM_016078    | FAM18B1  | 223  | 307  | 9.23727851135     |
| NM_016078    | FAM18B1  | 1332 | 1391 | 5.53683878566     |
| NM_016078    | FAM18B1  | 819  | 895  | 6.5368387932      |
| NM_016078    | FAM18B1  | 310  | 448  | 8.70676379465     |
| NM_016078    | FAM18B1  | 89   | 194  | 6.53683879321     |
| NM_016078    | FAM18B1  | 606  | 704  | 7.12180129392     |
| NM_001204458 | TNFRSF19 |      | 561  | 616 6.13982771393 |
| NM_001204458 | TNFRSF19 |      | 152  | 241 6.72880780727 |
| NM_001204458 | TNFRSF19 |      | 257  | 342 5.1438453141  |

|              |         |      |      |               |
|--------------|---------|------|------|---------------|
| NM_004041    | ARRB1   | 991  | 1036 | 3.9134470105  |
| NM_001031716 | OBFC2A  | 1561 | 1635 | 7.90326535473 |
| NM_001031716 | OBFC2A  | 224  | 273  | 5.49719805068 |
| NM_001031712 | TRMT11  | 301  | 390  | 6.92779898865 |
| NM_001031711 | ERGIC1  | 1589 | 1674 | 4.31036573973 |
| NM_001031711 | ERGIC1  | 696  | 804  | 4.89515449013 |
| NM_001031711 | ERGIC1  | 967  | 1025 | 4.89532824045 |
| NM_001031711 | ERGIC1  | 1947 | 1991 | 3.22622653035 |
| NM_001031711 | ERGIC1  | 2431 | 2635 | 6.11772066179 |
| NM_001031711 | ERGIC1  | 278  | 424  | 6.11772066179 |
| NM_001031711 | ERGIC1  | 432  | 533  | 3.31036573973 |
| NM_005184    | CALM3   | 1735 | 1783 | 3.08860293201 |
| NM_005184    | CALM3   | 1608 | 1713 | 2.08860292446 |
| NM_005184    | CALM3   | 79   | 135  | 2.0884291817  |
| NM_005184    | CALM3   | 174  | 238  | 2.67356543274 |
| NM_005184    | CALM3   | 1465 | 1600 | 4.89595785407 |
| NM_005184    | CALM3   | 930  | 1026 | 3.67356543274 |
| NM_005184    | CALM3   | 240  | 448  | 4.54803455065 |
| NM_005184    | CALM3   | 1808 | 1956 | 5.33653044546 |
| NM_005184    | CALM3   | 455  | 570  | 3.4105310269  |
| NM_005184    | CALM3   | 2070 | 2218 | 3.89595785407 |
| NM_005184    | CALM3   | 592  | 902  | 6.25852793346 |
| NM_005184    | CALM3   | 1979 | 2059 | 3.89595785407 |
| NM_005184    | CALM3   | 1152 | 1437 | 5.33653044546 |
| NM_001031847 | CPT1A   | 1682 | 1735 | 5.33169989987 |
| NM_001031847 | CPT1A   | 1560 | 1617 | 6.33170663093 |
| NM_001031847 | CPT1A   | 129  | 187  | 6.33170663093 |
| NM_001031847 | CPT1A   | 1248 | 1288 | 5.33170662338 |
| NM_001031847 | CPT1A   | 1149 | 1242 | 7.65363472581 |
| NM_001031847 | CPT1A   | 998  | 1105 | 7.50163163237 |
| NM_001031847 | CPT1A   | 197  | 336  | 7.79113824956 |
| NM_001031847 | CPT1A   | 1316 | 1540 | 7.33170663093 |
| NM_001031847 | CPT1A   | 348  | 632  | 8.41916947218 |
| NM_001031847 | CPT1A   | 1743 | 1876 | 6.91666913165 |
| NM_001031847 | CPT1A   | 2006 | 2216 | 8.33170663093 |
| NM_001031847 | CPT1A   | 659  | 972  | 8.7240240537  |
| NM_001146032 | FCH02   | 2402 | 2459 | 6.81283255819 |
| NM_001146030 | SEMA7A  | 2436 | 2488 | 9.97807799476 |
| NM_001146030 | SEMA7A  | 779  | 822  | 8.65597614955 |
| NM_001146030 | SEMA7A  | 2510 | 2544 | 9.24093865028 |
| NM_001146030 | SEMA7A  | 191  | 274  | 7.65614316882 |
| NM_001146030 | SEMA7A  | 1525 | 1610 | 7.6521322997  |
| NM_001146030 | SEMA7A  | 1419 | 1490 | 9.65614989987 |
| NM_001146030 | SEMA7A  | 2128 | 2210 | 9.65614989987 |
| NM_178148    | SLC35B2 | 234  | 306  | 8.47113324227 |
| NM_178148    | SLC35B2 | 844  | 909  | 6.47113324227 |
| NM_178148    | SLC35B2 | 521  | 563  | 7.79306133716 |
| NM_178148    | SLC35B2 | 1634 | 1697 | 6.47113324227 |
| NM_178148    | SLC35B2 | 1028 | 1069 | 6.97195653361 |
| NM_178148    | SLC35B2 | 147  | 178  | 5.38699403289 |

|           |         |      |      |               |
|-----------|---------|------|------|---------------|
| NM_178148 | SLC35B2 | 583  | 742  | 9.55859608352 |
| NM_178148 | SLC35B2 | 1876 | 1915 | 6.47113300635 |
| NM_178148 | SLC35B2 | 1944 | 2040 | 8.05609574299 |
| NM_178148 | SLC35B2 | 307  | 432  | 7.47113324227 |
| NM_178148 | SLC35B2 | 1712 | 1875 | 9.05609574299 |
| NM_178148 | SLC35B2 | 1178 | 1381 | 8.79306133716 |
| NM_178148 | SLC35B2 | 973  | 1027 | 5.4671156421  |
| NM_178148 | SLC35B2 | 1389 | 1564 | 8.27848816433 |
| NM_016215 | EGFL7   | 695  | 757  | 11.4599124449 |
| NM_016215 | EGFL7   | 546  | 590  | 11.4558948449 |
| NM_016217 | HECA    | 1735 | 1802 | 10.8806490635 |
| NM_016217 | HECA    | 3608 | 3671 | 10.9647882729 |
| NM_016217 | HECA    | 5214 | 5260 | 9.88064906349 |
| NM_016216 | DBR1    | 931  | 992  | 6.49465239093 |
| NM_016211 | SEC31A  | 3841 | 3909 | 4.39282440747 |
| NM_016211 | SEC31A  | 490  | 570  | 5.39282440725 |
| NM_016211 | SEC31A  | 1687 | 1759 | 4.97778690819 |
| NM_016211 | SEC31A  | 1778 | 1851 | 7.20017932953 |
| NM_016211 | SEC31A  | 246  | 279  | 5.39282417156 |
| NM_016211 | SEC31A  | 418  | 468  | 4.39282440747 |
| NM_016211 | SEC31A  | 1222 | 1330 | 5.39282440747 |
| NM_016211 | SEC31A  | 761  | 812  | 4.30868519809 |
| NM_016211 | SEC31A  | 3499 | 3566 | 4.39282440747 |
| NM_016211 | SEC31A  | 2392 | 2459 | 4.39282440747 |
| NM_016211 | SEC31A  | 3573 | 3633 | 3.39282439992 |
| NM_016211 | SEC31A  | 1335 | 1377 | 3.39282439992 |
| NM_016211 | SEC31A  | 3029 | 3093 | 4.97778667228 |
| NM_016211 | SEC31A  | 817  | 864  | 4.97376930802 |
| NM_016211 | SEC31A  | 2758 | 2838 | 4.39265065716 |
| NM_016211 | SEC31A  | 1914 | 2020 | 5.71475250236 |
| NM_016211 | SEC31A  | 2093 | 2233 | 6.39282440747 |
| NM_016211 | SEC31A  | 296  | 377  | 5.9777869082  |
| NM_016211 | SEC31A  | 1452 | 1644 | 5.9777869082  |
| NM_016211 | SEC31A  | 580  | 711  | 5.39282440747 |
| NM_016211 | SEC31A  | 2234 | 2344 | 5.9777869082  |
| NM_016211 | SEC31A  | 882  | 1075 | 6.71475250236 |
| NM_032991 | CASP3   | 270  | 324  | 6.62060352124 |
| NM_032991 | CASP3   | 361  | 402  | 6.62060352124 |
| NM_032991 | CASP3   | 1289 | 1366 | 6.70474272308 |
| NM_016213 | TRIP4   | 1116 | 1198 | 7.50037940374 |
| NM_016213 | TRIP4   | 277  | 316  | 6.91139953876 |
| NM_016213 | TRIP4   | 580  | 650  | 6.91541040788 |
| NM_016213 | TRIP4   | 1313 | 1391 | 6.91524338862 |
| NM_005188 | CBL     | 760  | 836  | 11.1176756416 |
| NM_005188 | CBL     | 8524 | 8587 | 10.6986205421 |
| NM_005188 | CBL     | 5110 | 5202 | 10.1176689105 |
| NM_005188 | CBL     | 1504 | 1552 | 10.702464392  |
| NM_005188 | CBL     | 2442 | 2486 | 10.1136580414 |
| NM_005188 | CBL     | 8778 | 8822 | 9.0335364322  |
| NM_005188 | CBL     | 9703 | 9759 | 11.1176756416 |

|           |          |      |      |               |
|-----------|----------|------|------|---------------|
| NM_005188 | CBL      | 923  | 1011 | 10.1176756416 |
| NM_005188 | CBL      | 305  | 366  | 10.1136580414 |
| NM_005188 | CBL      | 1619 | 1658 | 10.1136580414 |
| NM_005188 | CBL      | 7729 | 7770 | 9.11767564136 |
| NM_005188 | CBL      | 8449 | 8514 | 10.6986205421 |
| NM_005188 | CBL      | 2152 | 2233 | 10.1136580414 |
| NM_016219 | MAN1B1   | 2067 | 2124 | 7.16263036697 |
| NM_016219 | MAN1B1   | 2411 | 2468 | 6.16263036675 |
| NM_016219 | MAN1B1   | 302  | 400  | 7.57766786625 |
| NM_016219 | MAN1B1   | 1903 | 1960 | 6.16263036697 |
| NM_016219 | MAN1B1   | 2272 | 2318 | 6.1586127668  |
| NM_016219 | MAN1B1   | 1613 | 1686 | 6.5776678587  |
| NM_016219 | MAN1B1   | 2197 | 2261 | 4.57365026608 |
| NM_016219 | MAN1B1   | 214  | 258  | 5.49352865687 |
| NM_016219 | MAN1B1   | 481  | 553  | 4.5776611352  |
| NM_016219 | MAN1B1   | 797  | 848  | 5.49352865687 |
| NM_016219 | MAN1B1   | 1732 | 1843 | 6.57766786625 |
| NM_016219 | MAN1B1   | 930  | 1097 | 7.16263036697 |
| NM_016219 | MAN1B1   | 1106 | 1245 | 6.16263036697 |
| NM_194318 | B3GALTL  | 250  | 315  | 9.03979542267 |
| NM_194318 | B3GALTL  | 824  | 858  | 10.6247579234 |
| NM_194318 | B3GALTL  | 1062 | 1155 | 10.1239346245 |
| NM_030593 | SIRT2    | 1149 | 1186 | 6.91383971145 |
| NM_030593 | SIRT2    | 957  | 1062 | 9.31990701572 |
| NM_000430 | PAFAH1B1 | 3725 | 3790 | 6.04997581924 |
| NM_000430 | PAFAH1B1 | 1744 | 1787 | 4.04595845498 |
| NM_000430 | PAFAH1B1 | 657  | 700  | 5.63493182482 |
| NM_000430 | PAFAH1B1 | 2680 | 2731 | 5.04595845498 |
| NM_000430 | PAFAH1B1 | 4450 | 4526 | 5.63493831996 |
| NM_000430 | PAFAH1B1 | 3079 | 3124 | 4.04595845498 |
| NM_000430 | PAFAH1B1 | 2111 | 2173 | 6.63493855588 |
| NM_000430 | PAFAH1B1 | 5457 | 5561 | 6.04997605515 |
| NM_000430 | PAFAH1B1 | 564  | 629  | 5.63493831996 |
| NM_000430 | PAFAH1B1 | 1577 | 1706 | 7.2199010566  |
| NM_000430 | PAFAH1B1 | 4820 | 4913 | 6.04997605515 |
| NM_000430 | PAFAH1B1 | 155  | 199  | 4.96583684577 |
| NM_000430 | PAFAH1B1 | 703  | 749  | 5.04980230484 |
| NM_000430 | PAFAH1B1 | 2262 | 2346 | 5.0499693241  |
| NM_000430 | PAFAH1B1 | 1216 | 1294 | 6.04997605493 |
| NM_000430 | PAFAH1B1 | 4246 | 4364 | 6.37190415004 |
| NM_000430 | PAFAH1B1 | 1800 | 1954 | 7.85733097721 |
| NM_000430 | PAFAH1B1 | 1296 | 1560 | 7.2199010566  |
| NM_000430 | PAFAH1B1 | 924  | 1151 | 8.2199010566  |
| NM_000430 | PAFAH1B1 | 308  | 461  | 7.2199010566  |
| NM_002333 | LRP3     | 631  | 698  | 9.53856221656 |
| NM_002333 | LRP3     | 1607 | 1683 | 8.95359971583 |
| NM_002333 | LRP3     | 1689 | 1739 | 7.95359971583 |
| NM_002333 | LRP3     | 1773 | 1856 | 10.5385622166 |
| NM_002333 | LRP3     | 348  | 427  | 9.95359971584 |
| NM_002333 | LRP3     | 439  | 553  | 11.2755278107 |

|              |         |      |      |                 |
|--------------|---------|------|------|-----------------|
| NM_002333    | LRP3    | 1414 | 1545 | 11.4130313345   |
| NM_002333    | LRP3    | 766  | 870  | 10.2755278107   |
| NM_002333    | LRP3    | 902  | 1048 | 10.5385622166   |
| NM_002333    | LRP3    | 261  | 343  | 9.53856220901   |
| NM_002333    | LRP3    | 127  | 193  | 9.5385554855    |
| NM_023923    | PHACTR4 | 1266 | 1325 | 4.63908607397   |
| NM_023923    | PHACTR4 | 680  | 763  | 4.63907957884   |
| NM_023923    | PHACTR4 | 907  | 978  | 6.22404857469   |
| NM_023923    | PHACTR4 | 4493 | 4562 | 6.63907957884   |
| NM_001198916 | PPFIBP1 | 2227 | 2291 | 5.28333364905   |
| NM_001198916 | PPFIBP1 | 3851 | 3928 | 5.28315990628   |
| NM_001198916 | PPFIBP1 | 2326 | 2373 | 5.27931605642   |
| NM_001198916 | PPFIBP1 | 4437 | 4505 | 6.27931605642   |
| NM_007208    | MRPL3   | 667  | 719  | 6.80035238636   |
| NM_007208    | MRPL3   | 752  | 828  | 6.21538988564   |
| NM_007208    | MRPL3   | 583  | 656  | 7.02274480769   |
| NM_007208    | MRPL3   | 975  | 1032 | 6.5373179803    |
| NM_007208    | MRPL3   | 188  | 255  | 5.21538315458   |
| NM_007208    | MRPL3   | 1427 | 1526 | 6.80035238636   |
| NM_007208    | MRPL3   | 1147 | 1294 | 8.12228048124   |
| NM_007208    | MRPL3   | 1033 | 1142 | 5.21538988564   |
| NM_007208    | MRPL3   | 278  | 453  | 8.02274480769   |
| NM_007209    | RPL35   | 150  | 223  | 1.02231822705   |
| NM_007209    | RPL35   | 226  | 312  | 1.60728072778   |
| NM_007209    | RPL35   | 13   | 136  | 2.1922432285    |
| NM_007209    | RPL35   | 405  | 458  | -0.977855523264 |
| NM_198973    | MKNK1   | 668  | 728  | 6.66752020179   |
| NM_198973    | MKNK1   | 747  | 833  | 8.25264972177   |
| NM_198977    | ARHGEF1 | 1665 | 1701 | 5.80414868063   |
| NM_198977    | ARHGEF1 | 1356 | 1439 | 6.8081662808    |
| NM_198977    | ARHGEF1 | 1873 | 1984 | 5.8081662808    |
| NM_198977    | ARHGEF1 | 1805 | 1868 | 7.39312877397   |
| NM_198977    | ARHGEF1 | 1606 | 1646 | 5.80414868063   |
| NM_198977    | ARHGEF1 | 155  | 232  | 5.8081662808    |
| NM_198977    | ARHGEF1 | 2621 | 2672 | 5.72402707142   |
| NM_198977    | ARHGEF1 | 2385 | 2444 | 6.72402707142   |
| NM_198977    | ARHGEF1 | 346  | 410  | 8.13009437569   |
| NM_198977    | ARHGEF1 | 2207 | 2276 | 7.3931287813    |
| NM_198977    | ARHGEF1 | 2054 | 2146 | 5.80799253048   |
| NM_198977    | ARHGEF1 | 1439 | 1550 | 7.39312878152   |
| NM_198976    | TH1L    | 321  | 380  | 3.85491334914   |
| NM_198976    | TH1L    | 1206 | 1312 | 4.85491334914   |
| NM_198976    | TH1L    | 1497 | 1599 | 5.17684144403   |
| NM_198976    | TH1L    | 238  | 287  | 3.85473959882   |
| NM_198976    | TH1L    | 656  | 719  | 3.85491311322   |
| NM_198976    | TH1L    | 565  | 635  | 3.85491334892   |
| NM_198976    | TH1L    | 954  | 1015 | 2.77077413976   |
| NM_198976    | TH1L    | 1770 | 1907 | 4.43987584986   |
| NM_198976    | TH1L    | 1335 | 1442 | 5.43987584986   |
| NM_198976    | TH1L    | 1616 | 1747 | 6.17684144403   |

|              |        |       |       |               |
|--------------|--------|-------|-------|---------------|
| NM_007200    | AKAP13 | 992   | 1044  | 7.17978080488 |
| NM_007200    | AKAP13 | 9933  | 10049 | 9.18379839751 |
| NM_007200    | AKAP13 | 9035  | 9078  | 7.09965919567 |
| NM_007200    | AKAP13 | 5318  | 5366  | 7.17978080488 |
| NM_007200    | AKAP13 | 1352  | 1430  | 7.18379840483 |
| NM_007200    | AKAP13 | 10829 | 10903 | 7.18362465474 |
| NM_007200    | AKAP13 | 1706  | 1758  | 8.76876066986 |
| NM_007200    | AKAP13 | 10620 | 10707 | 7.18379816914 |
| NM_007200    | AKAP13 | 3133  | 3188  | 7.17978080488 |
| NM_007200    | AKAP13 | 3055  | 3122  | 8.18379839751 |
| NM_007200    | AKAP13 | 245   | 367   | 8.18379840506 |
| NM_007200    | AKAP13 | 900   | 986   | 9.18379840505 |
| NM_007200    | AKAP13 | 2315  | 2395  | 8.17978080488 |
| NM_002845    | PTPRM  | 328   | 445   | 8.72244705926 |
| NM_002845    | PTPRM  | 1144  | 1206  | 5.72227330894 |
| NM_002845    | PTPRM  | 1889  | 1953  | 7.30740955243 |
| NM_002845    | PTPRM  | 969   | 1014  | 6.72227330894 |
| NM_002845    | PTPRM  | 1272  | 1318  | 6.71842945909 |
| NM_002845    | PTPRM  | 5212  | 5260  | 6.72244705926 |
| NM_002845    | PTPRM  | 3307  | 3373  | 5.72227330894 |
| NM_002845    | PTPRM  | 2541  | 2584  | 7.30740282893 |
| NM_002845    | PTPRM  | 499   | 666   | 9.04437515415 |
| NM_002845    | PTPRM  | 2153  | 2183  | 5.63830784988 |
| NM_002845    | PTPRM  | 5310  | 5397  | 5.72244705926 |
| NM_002845    | PTPRM  | 2842  | 2898  | 7.72244682334 |
| NM_002845    | PTPRM  | 2438  | 2502  | 8.04437515415 |
| NM_002845    | PTPRM  | 4745  | 4826  | 5.72227330894 |
| NM_002845    | PTPRM  | 2254  | 2352  | 7.72244705926 |
| NM_002845    | PTPRM  | 3946  | 4088  | 8.04437515415 |
| NM_002845    | PTPRM  | 4515  | 4565  | 5.71842945909 |
| NM_002845    | PTPRM  | 4850  | 4889  | 5.72227330894 |
| NM_002845    | PTPRM  | 2753  | 2812  | 6.72244032821 |
| NM_002845    | PTPRM  | 844   | 940   | 7.30740955976 |
| NM_001003962 | CAPNS1 | 76    | 136   | 4.09702667378 |
| NM_001003962 | CAPNS1 | 603   | 684   | 4.68198917473 |
| NM_001003962 | CAPNS1 | 689   | 754   | 5.41895476889 |
| NM_001003962 | CAPNS1 | 1206  | 1273  | 3.09702667401 |
| NM_001003962 | CAPNS1 | 487   | 582   | 5.68198917473 |
| NM_001003962 | CAPNS1 | 371   | 406   | 4.01288746462 |
| NM_001003962 | CAPNS1 | 760   | 874   | 5.09702667401 |
| NM_001003962 | CAPNS1 | 884   | 1124  | 7.00391726961 |
| NM_007204    | DDX20  | 2112  | 2177  | 8.39595198215 |
| NM_007204    | DDX20  | 1969  | 2030  | 8.39595198215 |
| NM_007204    | DDX20  | 1534  | 1569  | 7.31181278032 |
| NM_007204    | DDX20  | 2586  | 2636  | 8.97689689025 |
| NM_181716    | CENPV  | 1050  | 1100  | 6.40151972982 |
| NM_181716    | CENPV  | 500   | 556   | 4.07941788461 |
| NM_181716    | CENPV  | 769   | 837   | 5.6645541281  |
| NM_181716    | CENPV  | 664   | 754   | 6.07959163493 |
| NM_181716    | CENPV  | 931   | 1035  | 7.07959163493 |

|              |           |      |      |                    |
|--------------|-----------|------|------|--------------------|
| NM_000927    | ABCB1     | 391  | 454  | 7.18328519136      |
| NM_000927    | ABCB1     | 480  | 600  | 7.99064011342      |
| NM_000927    | ABCB1     | 4589 | 4661 | 7.76824769208      |
| NM_000927    | ABCB1     | 2967 | 3005 | 6.18328519136      |
| NM_000927    | ABCB1     | 2813 | 2961 | 8.99064011342      |
| NM_000927    | ABCB1     | 4292 | 4387 | 8.3532101928       |
| NM_000927    | ABCB1     | 2682 | 2792 | 9.09017578697      |
| NM_000927    | ABCB1     | 840  | 941  | 7.76824769208      |
| NM_000927    | ABCB1     | 2102 | 2368 | 9.64271681         |
| NM_000927    | ABCB1     | 3617 | 3729 | 7.50521328625      |
| NM_000927    | ABCB1     | 3515 | 3585 | 6.18328519136      |
| NM_000927    | ABCB1     | 3005 | 3330 | 10.7068471474      |
| NM_000927    | ABCB1     | 2372 | 2682 | 9.8837249095       |
| NM_000927    | ABCB1     | 3774 | 4253 | 10.392738557       |
| NM_000927    | ABCB1     | 3356 | 3495 | 10.0412661865      |
| NM_000927    | ABCB1     | 621  | 829  | 9.64271681         |
| NM_000927    | ABCB1     | 942  | 1566 | 11.7831980335      |
| NM_000927    | ABCB1     | 1615 | 2096 | 10.3532101928      |
| NM_002334    | LRP4      | 1935 | 1973 | 8.35845858252      |
| NM_002334    | LRP4      | 3781 | 3806 | 8.27833697331      |
| NM_002334    | LRP4      | 2199 | 2229 | 8.35845858252      |
| NM_001009984 | C20orf194 |      | 2252 | 2308 8.12600860808 |
| NM_003792    | EDF1      | 84   | 127  | 1.66548783624      |
| NM_003792    | EDF1      | 375  | 436  | 0.665487836245     |
| NM_003792    | EDF1      | 472  | 516  | 1.58134862686      |
| NM_003792    | EDF1      | 148  | 285  | 1.66548783624      |
| NM_006824    | EBNA1BP2  |      | 805  | 857 4.63018114086  |
| NM_006824    | EBNA1BP2  |      | 1130 | 1213 4.63018787191 |
| NM_006824    | EBNA1BP2  |      | 119  | 234 5.36715346608  |
| NM_006824    | EBNA1BP2  |      | 262  | 305 3.04120777102  |
| NM_006824    | EBNA1BP2  |      | 425  | 511 4.04522537119  |
| NM_006824    | EBNA1BP2  |      | 313  | 355 3.04505162087  |
| NM_006824    | EBNA1BP2  |      | 360  | 412 4.63018787191  |
| NM_006824    | EBNA1BP2  |      | 644  | 711 3.04521864014  |
| NM_003969    | UBE2M     | 896  | 952  | 5.02163529389      |
| NM_003969    | UBE2M     | 955  | 1101 | 7.02163529389      |
| NM_003969    | UBE2M     | 185  | 236  | 3.9374960845       |
| NM_003969    | UBE2M     | 666  | 854  | 7.9285258895       |
| NM_003969    | UBE2M     | 564  | 619  | 5.02163505797      |
| NM_003969    | UBE2M     | 1111 | 1196 | 5.02163528634      |
| NM_006321    | ARIH2     | 1492 | 1541 | 6.03676806145      |
| NM_006321    | ARIH2     | 3102 | 3153 | 5.0327506972       |
| NM_006321    | ARIH2     | 745  | 778  | 6.03676156632      |
| NM_006321    | ARIH2     | 441  | 493  | 5.0327506972       |
| NM_194278    | C14orf43  |      | 4910 | 4954 8.80887461541 |
| NM_194278    | C14orf43  |      | 643  | 691 9.72474213708  |
| NM_194278    | C14orf43  |      | 2293 | 2350 8.72474213708 |
| NM_194278    | C14orf43  |      | 8017 | 8078 10.389826247  |
| NM_194278    | C14orf43  |      | 7120 | 7158 8.72474213708 |
| NM_194278    | C14orf43  |      | 6529 | 6637 8.80888134646 |



|              |          |      |      |               |               |
|--------------|----------|------|------|---------------|---------------|
| NM_194278    | C14orf43 |      | 6697 | 6773          | 9.80888134646 |
| NM_194278    | C14orf43 |      | 7523 | 7604          | 8.80888134624 |
| NM_003960    | NAT8     | 65   | 172  | 10.6094533009 |               |
| NM_003960    | NAT8     | 746  | 802  | 9.60927955059 |               |
| NM_003960    | NAT8     | 701  | 736  | 8.60543570073 |               |
| NM_003960    | NAT8     | 465  | 577  | 11.1944158016 |               |
| NM_003960    | NAT8     | 814  | 907  | 10.6094533009 |               |
| NM_003960    | NAT8     | 588  | 665  | 11.1944158016 |               |
| NM_003960    | NAT8     | 368  | 455  | 11.1944158016 |               |
| NM_003960    | NAT8     | 318  | 367  | 9.60944656985 |               |
| NM_001032394 | GPR126   | 1330 | 1371 | 5.35856921987 |               |
| NM_001032394 | GPR126   | 6730 | 6781 | 3.7736067116  |               |
| NM_001032394 | GPR126   | 1904 | 1982 | 5.35856898395 |               |
| NM_001032394 | GPR126   | 2760 | 2843 | 4.77360648323 |               |
| NM_001032394 | GPR126   | 2927 | 2980 | 5.77359998809 |               |
| NM_001032394 | GPR126   | 1255 | 1321 | 6.09553481403 |               |
| NM_001032394 | GPR126   | 3698 | 3753 | 4.77360671892 |               |
| NM_001032394 | GPR126   | 2561 | 2615 | 5.35856898395 |               |
| NM_001032394 | GPR126   | 2434 | 2510 | 5.35856921987 |               |
| NM_001032394 | GPR126   | 1376 | 1512 | 6.77360671914 |               |
| NM_001032394 | GPR126   | 5629 | 5731 | 3.76958911897 |               |
| NM_001032394 | GPR126   | 4420 | 4497 | 3.77359998809 |               |
| NM_001032394 | GPR126   | 1829 | 1887 | 5.35455161969 |               |
| NM_001032394 | GPR126   | 5023 | 5074 | 4.77360671892 |               |
| NM_001032394 | GPR126   | 6137 | 6187 | 3.77343296883 |               |
| NM_001032394 | GPR126   | 718  | 784  | 5.35856921986 |               |
| NM_001032394 | GPR126   | 1557 | 1605 | 5.35856921232 |               |
| NM_001032394 | GPR126   | 585  | 691  | 5.77360671914 |               |
| NM_001032394 | GPR126   | 3012 | 3161 | 6.77360671914 |               |
| NM_001032394 | GPR126   | 357  | 455  | 6.35856921987 |               |
| NM_001032394 | GPR126   | 1654 | 1723 | 4.68946750976 |               |
| NM_001032394 | GPR126   | 3595 | 3690 | 5.35856921987 |               |
| NM_001032394 | GPR126   | 4058 | 4118 | 3.77343296883 |               |
| NM_001032394 | GPR126   | 3784 | 3872 | 4.77359998809 |               |
| NM_001032394 | GPR126   | 523  | 579  | 3.68946750976 |               |
| NM_001032394 | GPR126   | 2126 | 2282 | 6.77360671914 |               |
| NM_001032394 | GPR126   | 5955 | 6009 | 3.76958911897 |               |
| NM_001032394 | GPR126   | 3185 | 3273 | 5.35856921987 |               |
| NM_001032394 | GPR126   | 2651 | 2753 | 5.77360671914 |               |
| NM_001032394 | GPR126   | 3293 | 3560 | 7.35856921987 |               |
| NM_001032394 | GPR126   | 2310 | 2402 | 5.35856921987 |               |
| NM_001126    | ADSS     | 519  | 563  | 3.24542808362 |               |
| NM_001126    | ADSS     | 1933 | 1996 | 4.16146262455 |               |
| NM_001126    | ADSS     | 657  | 729  | 3.24559510288 |               |
| NM_001126    | ADSS     | 1119 | 1199 | 4.24158423376 |               |
| NM_001126    | ADSS     | 1275 | 1460 | 5.24560183394 |               |
| NM_001075098 | MOCS1    | 873  | 949  | 8.54483722259 |               |
| NM_003796    | C19orf2  | 1198 | 1294 | 4.62018577909 |               |
| NM_001083926 | ASRGL1   | 2296 | 2351 | 7.24122498627 |               |
| NM_001083926 | ASRGL1   | 298  | 359  | 5.23720739364 |               |

|              |        |      |      |               |
|--------------|--------|------|------|---------------|
| NM_001083926 | ASRGL1 | 667  | 723  | 7.24122498627 |
| NM_001083926 | ASRGL1 | 1227 | 1284 | 6.24121826276 |
| NM_001083926 | ASRGL1 | 1367 | 1410 | 6.24121826276 |
| NM_001083926 | ASRGL1 | 484  | 611  | 7.24122499382 |
| NM_001083926 | ASRGL1 | 834  | 909  | 6.82618749432 |
| NM_003797    | EED    | 1376 | 1434 | 6.70419444023 |
| NM_003797    | EED    | 1810 | 1901 | 7.70419444778 |
| NM_003797    | EED    | 1102 | 1172 | 7.28915671259 |
| NM_003797    | EED    | 857  | 990  | 8.87411944923 |
| NM_024759    | NIPAL2 | 582  | 664  | 12.041812797  |
| NM_024759    | NIPAL2 | 855  | 903  | 9.95767358763 |
| NM_024758    | AGMAT  | 1179 | 1221 | 3.07877401203 |
| NM_024758    | AGMAT  | 761  | 852  | 5.88630268441 |
| NM_024758    | AGMAT  | 2056 | 2107 | 4.57977105369 |
| NM_024758    | AGMAT  | 2932 | 2967 | 3.07493016218 |
| NM_024758    | AGMAT  | 497  | 631  | 6.77938748049 |
| NM_024758    | AGMAT  | 311  | 474  | 5.66391026307 |
| NM_024758    | AGMAT  | 852  | 1155 | 7.72280395212 |
| NM_024758    | AGMAT  | 1304 | 1483 | 5.07894776235 |
| NM_024758    | AGMAT  | 1221 | 1290 | 4.66391025552 |
| NM_007065    | CDC37  | 1564 | 1645 | 6.33387260329 |
| NM_007065    | CDC37  | 1021 | 1100 | 4.59690700912 |
| NM_007065    | CDC37  | 1314 | 1357 | 4.01194450818 |
| NM_007065    | CDC37  | 1111 | 1155 | 5.01193777735 |
| NM_007065    | CDC37  | 1389 | 1467 | 5.0119445084  |
| NM_007065    | CDC37  | 62   | 179  | 5.59690700912 |
| NM_007065    | CDC37  | 716  | 792  | 3.0119445084  |
| NM_007065    | CDC37  | 429  | 554  | 5.33387260329 |
| NM_007065    | CDC37  | 804  | 905  | 5.33387260329 |
| NM_007065    | CDC37  | 1200 | 1263 | 4.59690700912 |
| NM_007065    | CDC37  | 576  | 670  | 5.81929943046 |
| NM_007065    | CDC37  | 215  | 280  | 4.01194450085 |
| NM_024757    | EHMT1  | 4234 | 4278 | 7.30326330143 |
| NM_024757    | EHMT1  | 4289 | 4346 | 7.89224340232 |
| NM_024757    | EHMT1  | 2677 | 2733 | 7.30326330143 |
| NM_024757    | EHMT1  | 2850 | 2921 | 7.89224340232 |
| NM_024757    | EHMT1  | 3380 | 3432 | 8.30326330143 |
| NM_024757    | EHMT1  | 4716 | 4751 | 6.22314169222 |
| NM_024757    | EHMT1  | 4898 | 4992 | 6.30728089405 |
| NM_024757    | EHMT1  | 3487 | 3585 | 7.89224316641 |
| NM_024757    | EHMT1  | 2348 | 2396 | 7.30326330143 |
| NM_024757    | EHMT1  | 1818 | 1899 | 7.89223667127 |
| NM_024757    | EHMT1  | 748  | 835  | 7.3072809016  |
| NM_003795    | SNX3   | 1148 | 1185 | 3.64341950822 |
| NM_003795    | SNX3   | 832  | 927  | 3.72755871761 |
| NM_003795    | SNX3   | 497  | 616  | 3.72755871761 |
| NM_003795    | SNX3   | 334  | 459  | 3.31252121833 |
| NM_003795    | SNX3   | 630  | 779  | 3.72755871761 |
| NM_024753    | TTC21B | 3877 | 3963 | 5.55938798867 |
| NM_173618    | IN080E | 241  | 333  | 7.6544540964  |

|              |           |      |      |               |               |
|--------------|-----------|------|------|---------------|---------------|
| NM_173618    | IN080E    | 482  | 554  | 5.65445409618 |               |
| NM_173618    | IN080E    | 103  | 167  | 6.65428034609 |               |
| NM_007359    | CASC3     | 2892 | 2948 | 4.11862134855 |               |
| NM_007359    | CASC3     | 3932 | 3984 | 3.03849973934 |               |
| NM_007357    | COG2      | 1409 | 1494 | 6.52382616692 |               |
| NM_007357    | COG2      | 2409 | 2493 | 5.52783703604 |               |
| NM_007357    | COG2      | 907  | 976  | 6.52784376687 |               |
| NM_001195597 | LOC285733 |      | 212  | 304           | 5.92503056364 |
| NM_001195597 | LOC285733 |      | 305  | 368           | 3.6030957377  |
| NM_001195597 | LOC285733 |      | 108  | 194           | 5.18806496947 |
| NM_001105573 | FBX045    | 263  | 331  | 9.03742245558 |               |
| NM_001568    | EIF3E     | 141  | 240  | 5.07599494218 |               |
| NM_001568    | EIF3E     | 512  | 560  | 2.48701484129 |               |
| NM_001568    | EIF3E     | 281  | 326  | 2.49085869114 |               |
| NM_001568    | EIF3E     | 802  | 861  | 1.49103220554 |               |
| NM_001568    | EIF3E     | 21   | 116  | 4.49103244146 |               |
| NM_001568    | EIF3E     | 330  | 430  | 4.29838736352 |               |
| NM_001568    | EIF3E     | 440  | 502  | 2.49103244146 |               |
| NM_001568    | EIF3E     | 1076 | 1228 | 5.07599494218 |               |
| NM_001568    | EIF3E     | 1255 | 1294 | 1.40689323208 |               |
| NM_001568    | EIF3E     | 889  | 1064 | 5.81296053635 |               |
| NM_001568    | EIF3E     | 615  | 747  | 5.39792303707 |               |
| NM_175614    | NDUFA11   | 477  | 524  | 7.87772484132 |               |
| NM_175614    | NDUFA11   | 277  | 357  | 7.87772484887 |               |
| NM_175614    | NDUFA11   | 541  | 617  | 5.87772484864 |               |
| NM_175614    | NDUFA11   | 621  | 710  | 6.87772484886 |               |
| NM_001193537 | TMEM126B  |      | 493  | 556           | 10.9893453771 |
| NM_001193537 | TMEM126B  |      | 114  | 193           | 10.4042091261 |
| NM_001193537 | TMEM126B  |      | 624  | 679           | 8.40438287618 |
| NM_145290    | GPR125    | 3784 | 3852 | 4.73235810868 |               |
| NM_145290    | GPR125    | 1939 | 2001 | 6.40145981878 |               |
| NM_145290    | GPR125    | 3051 | 3114 | 4.81649731051 |               |
| NM_145290    | GPR125    | 3276 | 3365 | 6.40145981878 |               |
| NM_145290    | GPR125    | 2331 | 2430 | 7.40145981878 |               |
| NM_145290    | GPR125    | 896  | 975  | 6.81649731806 |               |
| NM_145290    | GPR125    | 2570 | 2618 | 6.81247971789 |               |
| NM_145290    | GPR125    | 2134 | 2202 | 6.81632356774 |               |
| NM_145290    | GPR125    | 4323 | 4368 | 4.81247971789 |               |
| NM_145290    | GPR125    | 1146 | 1326 | 7.40145981878 |               |
| NM_145290    | GPR125    | 2232 | 2275 | 5.81649731051 |               |
| NM_145290    | GPR125    | 3627 | 3755 | 7.40145981878 |               |
| NM_145290    | GPR125    | 484  | 598  | 5.81649731806 |               |
| NM_145290    | GPR125    | 2839 | 2902 | 6.40145981878 |               |
| NM_145290    | GPR125    | 620  | 893  | 8.90396015931 |               |
| NM_145290    | GPR125    | 2471 | 2523 | 4.81649058701 |               |
| NM_145290    | GPR125    | 1067 | 1123 | 4.81632356774 |               |
| NM_145290    | GPR125    | 3409 | 3480 | 6.40145981878 |               |
| NM_145290    | GPR125    | 1706 | 1819 | 6.81649731806 |               |
| NM_145290    | GPR125    | 4173 | 4266 | 5.81649731806 |               |
| NM_145296    | CADM4     | 1718 | 1753 | 7.37092497788 |               |

|              |        |      |      |               |
|--------------|--------|------|------|---------------|
| NM_145296    | CADM4  | 122  | 170  | 5.13313609215 |
| NM_145296    | CADM4  | 1022 | 1100 | 6.13313609237 |
| NM_145296    | CADM4  | 559  | 630  | 5.13312936132 |
| NM_145296    | CADM4  | 1781 | 1852 | 5.1291184922  |
| NM_001024629 | NRP1   | 1571 | 1641 | 10.8670521601 |
| NM_001024629 | NRP1   | 1054 | 1132 | 12.0045556838 |
| NM_001024629 | NRP1   | 539  | 590  | 9.54511733414 |
| NM_001024629 | NRP1   | 993  | 1042 | 10.1300865659 |
| NM_001024629 | NRP1   | 1686 | 1795 | 12.1300865659 |
| NM_001024629 | NRP1   | 1925 | 2030 | 9.54512406497 |
| NM_001024629 | NRP1   | 637  | 862  | 12.5451240652 |
| NM_001024629 | NRP1   | 271  | 538  | 12.3524789873 |
| NM_001024629 | NRP1   | 1795 | 1916 | 12.2455637833 |
| NM_001024629 | NRP1   | 873  | 993  | 12.0045556838 |
| NM_001024629 | NRP1   | 1140 | 1279 | 12.5451240652 |
| NM_001024629 | NRP1   | 2031 | 2277 | 12.6325869064 |
| NM_001024629 | NRP1   | 1304 | 1559 | 13.3000115674 |
| NM_207309    | UAP1L1 | 2214 | 2275 | 10.3512005095 |
| NM_207309    | UAP1L1 | 1161 | 1231 | 11.3513742598 |
| NM_207309    | UAP1L1 | 1246 | 1280 | 9.34735665965 |
| NM_207309    | UAP1L1 | 773  | 847  | 10.9363300295 |
| NM_207309    | UAP1L1 | 2875 | 2930 | 10.3473566597 |
| NM_207309    | UAP1L1 | 3153 | 3273 | 9.35137425983 |
| NM_004886    | APBA3  | 218  | 271  | 9.77051528636 |
| NM_004886    | APBA3  | 520  | 594  | 11.4396169962 |
| NM_004886    | APBA3  | 994  | 1053 | 9.85448074543 |
| NM_138932    | A1CF   | 145  | 191  | 6.39634537815 |
| NM_138932    | A1CF   | 8203 | 8289 | 5.80737200831 |
| NM_138932    | A1CF   | 4712 | 4780 | 5.81121585816 |
| NM_138932    | A1CF   | 7326 | 7426 | 6.81138960826 |
| NM_138932    | A1CF   | 883  | 1004 | 6.3963521092  |
| NM_138932    | A1CF   | 5886 | 5935 | 5.81138960093 |
| NM_138932    | A1CF   | 5817 | 5886 | 6.81138960848 |
| NM_138932    | A1CF   | 2692 | 2734 | 4.81138287743 |
| NM_138932    | A1CF   | 1720 | 1763 | 4.81138960826 |
| NM_138932    | A1CF   | 1090 | 1133 | 4.7272503991  |
| NM_138932    | A1CF   | 3347 | 3414 | 5.80737200831 |
| NM_138932    | A1CF   | 2785 | 2836 | 4.81138960848 |
| NM_138932    | A1CF   | 2061 | 2133 | 4.81138960848 |
| NM_138932    | A1CF   | 422  | 466  | 4.81138960093 |
| NM_138932    | A1CF   | 1197 | 1244 | 5.81138960093 |
| NM_138932    | A1CF   | 6133 | 6198 | 6.39635187328 |
| NM_138932    | A1CF   | 3702 | 3772 | 4.81138960848 |
| NM_138932    | A1CF   | 2607 | 2642 | 4.7272503991  |
| NM_138932    | A1CF   | 7637 | 7689 | 4.81138937256 |
| NM_138932    | A1CF   | 6726 | 6787 | 4.81121585816 |
| NM_138932    | A1CF   | 8076 | 8146 | 6.81138960848 |
| NM_138932    | A1CF   | 787  | 865  | 6.81138960848 |
| NM_138932    | A1CF   | 7459 | 7577 | 6.81138960848 |
| NM_138932    | A1CF   | 9073 | 9100 | 4.7272503991  |

|              |          |      |      |                 |               |
|--------------|----------|------|------|-----------------|---------------|
| NM_138932    | A1CF     | 573  | 622  | 5.7272503991    |               |
| NM_138932    | A1CF     | 1541 | 1703 | 6.81138960848   |               |
| NM_138932    | A1CF     | 1866 | 1994 | 7.13331770337   |               |
| NM_138932    | A1CF     | 6283 | 6353 | 4.7272503991    |               |
| NM_138932    | A1CF     | 1251 | 1328 | 5.81121585816   |               |
| NM_138932    | A1CF     | 1344 | 1519 | 6.81138960848   |               |
| NM_138932    | A1CF     | 641  | 713  | 7.13331769582   |               |
| NM_001195622 | TOPORS   | 206  | 264  | 5.47026617211   |               |
| NM_001195626 | MLLT10   | 4074 | 4164 | 5.81920912598   |               |
| NM_020695    | REX01    | 2553 | 2603 | 10.0014264056   |               |
| NM_020695    | REX01    | 1871 | 1961 | 10.0016001559   |               |
| NM_020695    | REX01    | 4391 | 4445 | 8.41262005501   |               |
| NM_020695    | REX01    | 1703 | 1773 | 10.4166376552   |               |
| NM_020695    | REX01    | 3347 | 3417 | 9.41646390487   |               |
| NM_020695    | REX01    | 3599 | 3695 | 10.4166376552   |               |
| NM_020695    | REX01    | 3074 | 3171 | 8.41663741927   |               |
| NM_005831    | CALCOC02 |      | 1794 | 1814            | 2.30593696239 |
| NM_005831    | CALCOC02 |      | 1367 | 1447            | 3.89474331297 |
| NM_005831    | CALCOC02 |      | 133  | 171             | 2.30978081225 |
| NM_005831    | CALCOC02 |      | 649  | 734             | 2.30994783151 |
| NM_005831    | CALCOC02 |      | 1603 | 1675            | 2.30994783151 |
| NM_005831    | CALCOC02 |      | 1897 | 1967            | 3.30995456234 |
| NM_005831    | CALCOC02 |      | 1031 | 1106            | 3.30995456234 |
| NM_014106    | ZNF770   | 273  | 331  | 7.44777721745   |               |
| NM_014106    | ZNF770   | 4225 | 4271 | 5.86281471672   |               |
| NM_014106    | ZNF770   | 607  | 649  | 5.86281471672   |               |
| NM_014106    | ZNF770   | 774  | 811  | 7.36765560823   |               |
| NM_014106    | ZNF770   | 4886 | 4963 | 5.86683231667   |               |
| NM_014106    | ZNF770   | 1651 | 1731 | 7.4517945817    |               |
| NM_014106    | ZNF770   | 4679 | 4738 | 5.86281471672   |               |
| NM_014106    | ZNF770   | 1012 | 1082 | 7.4517945817    |               |
| NM_005520    | HNRNPH1  | 649  | 734  | 2.06260650024   |               |
| NM_005520    | HNRNPH1  | 2075 | 2192 | 3.52203811887   |               |
| NM_005520    | HNRNPH1  | 1675 | 1854 | 4.06260650024   |               |
| NM_005520    | HNRNPH1  | 1373 | 1437 | 0.0626065000146 |               |
| NM_005520    | HNRNPH1  | 1860 | 2070 | 3.86996142229   |               |
| NM_005520    | HNRNPH1  | 422  | 529  | 3.38453459512   |               |
| NM_005520    | HNRNPH1  | 1447 | 1623 | 3.64756900096   |               |
| NM_005520    | HNRNPH1  | 742  | 1305 | 5.48887125494   |               |
| NM_005520    | HNRNPH1  | 84   | 418  | 4.86996142229   |               |
| NM_004606    | TAF1     | 2264 | 2342 | 7.17097949272   |               |
| NM_004606    | TAF1     | 4391 | 4438 | 6.17097949272   |               |
| NM_004606    | TAF1     | 2411 | 2502 | 7.84007447177   |               |
| NM_005526    | HSF1     | 1120 | 1196 | 7.50568683953   |               |
| NM_005526    | HSF1     | 1383 | 1437 | 5.91670674619   |               |
| NM_005526    | HSF1     | 702  | 755  | 5.92072433881   |               |
| NM_005526    | HSF1     | 1623 | 1680 | 6.92055059604   |               |
| NM_005526    | HSF1     | 1832 | 1913 | 7.50568684708   |               |
| NM_005526    | HSF1     | 1985 | 2073 | 6.92072434636   |               |
| NM_005526    | HSF1     | 935  | 986  | 5.91670674619   |               |

|           |        |       |       |               |
|-----------|--------|-------|-------|---------------|
| NM_005526 | HSF1   | 552   | 623   | 5.92055059604 |
| NM_005526 | HSF1   | 1278  | 1379  | 6.92072434636 |
| NM_005526 | HSF1   | 207   | 291   | 6.92072434636 |
| NM_005837 | POP7   | 270   | 317   | 6.03632400323 |
| NM_005837 | POP7   | 858   | 908   | 7.62530410413 |
| NM_005837 | POP7   | 703   | 760   | 7.62530409658 |
| NM_005837 | POP7   | 382   | 417   | 6.95620239402 |
| NM_005837 | POP7   | 761   | 820   | 7.62530386821 |
| NM_005836 | HRSP12 | 394   | 424   | 5.10008197229 |
| NM_005839 | SRRM1  | 1273  | 1332  | 2.79741570251 |
| NM_005839 | SRRM1  | 1235  | 1271  | 2.79741570251 |
| NM_005839 | SRRM1  | 3683  | 3735  | 3.88138116158 |
| NM_005839 | SRRM1  | 1584  | 1630  | 2.88155490435 |
| NM_005839 | SRRM1  | 941   | 979   | 3.88138116158 |
| NM_005839 | SRRM1  | 1433  | 1527  | 2.88155467598 |
| NM_005839 | SRRM1  | 401   | 454   | 4.88155490435 |
| NM_005839 | SRRM1  | 2966  | 3037  | 2.88155491189 |
| NM_005839 | SRRM1  | 1702  | 1758  | 3.79741570251 |
| NM_005839 | SRRM1  | 585   | 659   | 3.88155491189 |
| NM_005839 | SRRM1  | 480   | 559   | 4.8815549119  |
| NM_005839 | SRRM1  | 1041  | 1130  | 4.8815549119  |
| NM_005839 | SRRM1  | 3736  | 3838  | 2.8815549119  |
| NM_005839 | SRRM1  | 3390  | 3483  | 4.46651741262 |
| NM_005839 | SRRM1  | 3486  | 3621  | 5.20348300678 |
| NM_005529 | HSPG2  | 2454  | 2487  | 9.58972025661 |
| NM_005529 | HSPG2  | 8271  | 8343  | 9.00074015594 |
| NM_005529 | HSPG2  | 7811  | 7914  | 9.00475775611 |
| NM_005529 | HSPG2  | 2178  | 2223  | 8.00074015594 |
| NM_005529 | HSPG2  | 4517  | 4574  | 8.00475775611 |
| NM_005529 | HSPG2  | 11440 | 11494 | 8.00458400579 |
| NM_005529 | HSPG2  | 380   | 449   | 8.00475775611 |
| NM_005529 | HSPG2  | 4167  | 4235  | 10.326685851  |
| NM_005529 | HSPG2  | 7262  | 7300  | 7.92061854673 |
| NM_005529 | HSPG2  | 2070  | 2161  | 9.00475752019 |
| NM_005529 | HSPG2  | 6766  | 6821  | 10.0047577561 |
| NM_005529 | HSPG2  | 1231  | 1308  | 8.00475775589 |
| NM_005529 | HSPG2  | 9560  | 9620  | 8.00458400579 |
| NM_005529 | HSPG2  | 7679  | 7749  | 9.58972025683 |
| NM_005529 | HSPG2  | 12292 | 12349 | 10.0047577561 |
| NM_005529 | HSPG2  | 10826 | 10854 | 9.00074015594 |
| NM_005529 | HSPG2  | 1807  | 1925  | 9.00475775611 |
| NM_005529 | HSPG2  | 2767  | 2823  | 9.00074015594 |
| NM_005529 | HSPG2  | 7571  | 7625  | 9.00475102506 |
| NM_005529 | HSPG2  | 1428  | 1501  | 8.92061854673 |
| NM_005529 | HSPG2  | 13315 | 13414 | 9.00475775611 |
| NM_005529 | HSPG2  | 2980  | 3075  | 10.326685851  |
| NM_005529 | HSPG2  | 9656  | 9769  | 10.326685851  |
| NM_005529 | HSPG2  | 1537  | 1581  | 9.00475752019 |
| NM_005529 | HSPG2  | 9257  | 9339  | 9.00475102506 |
| NM_005529 | HSPG2  | 10407 | 10465 | 8.00074015594 |

|           |        |       |       |               |
|-----------|--------|-------|-------|---------------|
| NM_005529 | HSPG2  | 12564 | 12647 | 9.58972025683 |
| NM_005529 | HSPG2  | 452   | 619   | 11.1746827576 |
| NM_005529 | HSPG2  | 7131  | 7175  | 9.50558104745 |
| NM_005529 | HSPG2  | 8811  | 8945  | 10.0047577561 |
| NM_005529 | HSPG2  | 705   | 786   | 9.00475775611 |
| NM_005529 | HSPG2  | 4667  | 4748  | 8.00475775589 |
| NM_005529 | HSPG2  | 12451 | 12545 | 10.0047577561 |
| NM_005529 | HSPG2  | 11117 | 11176 | 9.00475102506 |
| NM_005529 | HSPG2  | 13702 | 13752 | 8.00475775589 |
| NM_005529 | HSPG2  | 6408  | 6507  | 10.5897202568 |
| NM_005529 | HSPG2  | 1681  | 1750  | 9.00475774856 |
| NM_005529 | HSPG2  | 2506  | 2604  | 9.58972025683 |
| NM_005529 | HSPG2  | 10541 | 10744 | 11.0047577561 |
| NM_005529 | HSPG2  | 981   | 1179  | 11.0047577561 |
| NM_005529 | HSPG2  | 129   | 353   | 11.5897202568 |
| NM_005529 | HSPG2  | 13808 | 13876 | 8.00475775611 |
| NM_014109 | ATAD2  | 3213  | 3294  | 5.52938336095 |
| NM_014109 | ATAD2  | 1347  | 1444  | 4.94442085268 |
| NM_014109 | ATAD2  | 4789  | 4848  | 4.52937662989 |
| NM_014109 | ATAD2  | 3090  | 3209  | 5.52938336095 |
| NM_014109 | ATAD2  | 4634  | 4688  | 2.94040326005 |
| NM_014109 | ATAD2  | 3373  | 3431  | 3.94442085268 |
| NM_014109 | ATAD2  | 2302  | 2376  | 4.94442086023 |
| NM_014109 | ATAD2  | 3957  | 4024  | 3.94040326005 |
| NM_014109 | ATAD2  | 2760  | 2821  | 4.94442086023 |
| NM_014109 | ATAD2  | 898   | 966   | 3.94442086023 |
| NM_014109 | ATAD2  | 1780  | 1859  | 2.94442086023 |
| NM_014109 | ATAD2  | 3887  | 3924  | 2.94040326005 |
| NM_014109 | ATAD2  | 1165  | 1216  | 4.5293833534  |
| NM_014109 | ATAD2  | 290   | 340   | 2.94424710991 |
| NM_014109 | ATAD2  | 2630  | 2666  | 2.94040326005 |
| NM_014109 | ATAD2  | 2235  | 2294  | 2.94442086023 |
| NM_014109 | ATAD2  | 4185  | 4223  | 2.86028165084 |
| NM_014109 | ATAD2  | 3508  | 3577  | 4.52938312503 |
| NM_014109 | ATAD2  | 1568  | 1651  | 3.94442085268 |
| NM_014109 | ATAD2  | 1235  | 1297  | 3.94442085268 |
| NM_014109 | ATAD2  | 2848  | 2930  | 2.94040326005 |
| NM_014109 | ATAD2  | 5196  | 5330  | 4.94442086023 |
| NM_014109 | ATAD2  | 5376  | 5449  | 2.94040326005 |
| NM_014109 | ATAD2  | 4067  | 4130  | 3.94442062431 |
| NM_014109 | ATAD2  | 3712  | 3834  | 3.94442086023 |
| NM_006339 | HMG20B | 626   | 692   | 4.17994417782 |
| NM_006339 | HMG20B | 494   | 550   | 4.17593330871 |
| NM_003786 | ABCC3  | 2919  | 2992  | 9.87897440613 |
| NM_003786 | ABCC3  | 4931  | 5024  | 11.3384060248 |
| NM_003786 | ABCC3  | 1010  | 1087  | 10.4639366709 |
| NM_003786 | ABCC3  | 3389  | 3453  | 9.87897440613 |
| NM_003786 | ABCC3  | 1302  | 1374  | 8.87896767507 |
| NM_003786 | ABCC3  | 4013  | 4091  | 7.87897439858 |
| NM_003786 | ABCC3  | 2294  | 2340  | 7.87495680595 |

|              |         |      |      |               |
|--------------|---------|------|------|---------------|
| NM_003786    | ABCC3   | 3532 | 3602 | 8.87897417021 |
| NM_003786    | ABCC3   | 3652 | 3717 | 9.46393690685 |
| NM_003786    | ABCC3   | 4117 | 4180 | 7.87495680595 |
| NM_003786    | ABCC3   | 1508 | 1543 | 7.87495680595 |
| NM_003786    | ABCC3   | 808  | 863  | 7.79483519674 |
| NM_003786    | ABCC3   | 599  | 640  | 7.87896767507 |
| NM_003786    | ABCC3   | 2649 | 2716 | 8.87880065581 |
| NM_003786    | ABCC3   | 143  | 193  | 7.8789744059  |
| NM_003786    | ABCC3   | 3762 | 3916 | 11.200902501  |
| NM_003786    | ABCC3   | 2753 | 2827 | 7.87896767507 |
| NM_003786    | ABCC3   | 3237 | 3364 | 9.87897440613 |
| NM_003786    | ABCC3   | 2594 | 2633 | 7.79483519674 |
| NM_003786    | ABCC3   | 3942 | 4013 | 7.8789744059  |
| NM_003786    | ABCC3   | 1378 | 1505 | 10.8789744061 |
| NM_003786    | ABCC3   | 4704 | 4772 | 7.87897417021 |
| NM_003786    | ABCC3   | 1730 | 1838 | 10.200902501  |
| NM_003786    | ABCC3   | 4478 | 4588 | 8.87897440613 |
| NM_003786    | ABCC3   | 670  | 748  | 9.46393690685 |
| NM_003786    | ABCC3   | 2355 | 2426 | 9.46393667093 |
| NM_003786    | ABCC3   | 453  | 519  | 10.200902501  |
| NM_003786    | ABCC3   | 5034 | 5145 | 7.87897440613 |
| NM_003786    | ABCC3   | 68   | 138  | 9.46393690685 |
| NM_003786    | ABCC3   | 1127 | 1302 | 11.5794141243 |
| NM_003786    | ABCC3   | 4197 | 4322 | 9.87897440613 |
| NM_003786    | ABCC3   | 2168 | 2294 | 8.87897440613 |
| NM_003786    | ABCC3   | 232  | 355  | 7.87897440613 |
| NM_003789    | TRADD   | 509  | 539  | 7.41543978889 |
| NM_006336    | ZER1    | 2128 | 2197 | 7.8084149051  |
| NM_006336    | ZER1    | 472  | 525  | 7.80457105525 |
| NM_006336    | ZER1    | 2567 | 2603 | 6.80457105525 |
| NM_006336    | ZER1    | 378  | 415  | 7.8084149051  |
| NM_006335    | TIMM17A | 1140 | 1196 | 6.75923831328 |
| NM_006335    | TIMM17A | 771  | 832  | 5.17829317681 |
| NM_006335    | TIMM17A | 58   | 117  | 6.17829340518 |
| NM_006335    | TIMM17A | 852  | 957  | 7.98564833479 |
| NM_006335    | TIMM17A | 536  | 630  | 6.76325591345 |
| NM_006335    | TIMM17A | 406  | 492  | 5.17829341272 |
| NM_006335    | TIMM17A | 250  | 324  | 6.17829341272 |
| NM_001172420 | EFHC1   | 1447 | 1497 | 9.66178128764 |
| NM_001172420 | EFHC1   | 1286 | 1335 | 7.65776369502 |
| NM_006333    | C1D     | 191  | 290  | 3.7497721179  |
| NM_006333    | C1D     | 97   | 188  | 3.33473461862 |
| NM_006333    | C1D     | 316  | 430  | 1.7497721179  |
| NM_006332    | IFI30   | 41   | 1013 | 16.6000494257 |
| NM_006331    | EMG1    | 632  | 668  | 4.62186734404 |
| NM_006331    | EMG1    | 199  | 300  | 5.94781303887 |
| NM_006331    | EMG1    | 926  | 1031 | 4.62588494421 |
| NM_006331    | EMG1    | 487  | 521  | 5.12670823555 |
| NM_006330    | LYPLA1  | 166  | 213  | 6.60449278238 |
| NM_006330    | LYPLA1  | 1803 | 1830 | 4.52035380892 |



|              |          |      |      |                    |
|--------------|----------|------|------|--------------------|
| NM_006330    | LYPLA1   | 875  | 960  | 6.92642087727      |
| NM_001086521 | C17orf89 |      | 390  | 548 6.97721971272  |
| NM_001203258 | MTA1     | 431  | 484  | 5.51117997176      |
| NM_001203258 | MTA1     | 1085 | 1120 | 4.42704076993      |
| NM_001203258 | MTA1     | 2066 | 2115 | 4.51100622899      |
| NM_001203258 | MTA1     | 2563 | 2708 | 8.75910749275      |
| NM_001203258 | MTA1     | 2443 | 2552 | 5.51117997931      |
| NM_001203258 | MTA1     | 196  | 286  | 6.51117997931      |
| NM_004888    | ATP6V1G1 |      | 1032 | 1077 4.17931339452 |
| NM_004888    | ATP6V1G1 |      | 153  | 230 3.17931339452  |
| NM_004888    | ATP6V1G1 |      | 625  | 680 3.26327885358  |
| NM_004888    | ATP6V1G1 |      | 101  | 151 4.84840837357  |
| NM_004888    | ATP6V1G1 |      | 865  | 931 3.25943500373  |
| NM_005787    | ALG3     | 196  | 325  | 8.90795705029      |
| NM_005787    | ALG3     | 81   | 128  | 7.23885534018      |
| NM_005787    | ALG3     | 972  | 1125 | 9.7824261682       |
| NM_005787    | ALG3     | 608  | 965  | 10.8465565056      |
| NM_005787    | ALG3     | 1174 | 1316 | 9.13034947162      |
| NM_005787    | ALG3     | 366  | 584  | 11.1809755447      |
| NM_005785    | RNF41    | 4266 | 4364 | 5.72081012686      |
| NM_005783    | TXNDC9   | 672  | 746  | 6.2876006428       |
| NM_005783    | TXNDC9   | 834  | 881  | 7.02456622964      |
| NM_005783    | TXNDC9   | 89   | 217  | 7.50999306436      |
| NM_005783    | TXNDC9   | 530  | 635  | 7.02456623697      |
| NM_005781    | TNK2     | 4142 | 4211 | 9.27964314127      |
| NM_005781    | TNK2     | 961  | 1028 | 9.86076179213      |
| NM_005781    | TNK2     | 1747 | 1830 | 8.1956776822       |
| NM_032356    | LSMD1    | 422  | 461  | 6.83214911549      |
| NM_032356    | LSMD1    | 815  | 853  | 8.49723322542      |
| NM_032356    | LSMD1    | 314  | 370  | 6.83214911549      |
| NM_032356    | LSMD1    | 722  | 811  | 7.91628832487      |
| NM_032356    | LSMD1    | 907  | 973  | 8.50125058968      |
| NM_032357    | CCDC115  | 1421 | 1484 | 7.18275116958      |
| NM_032357    | CCDC115  | 1004 | 1100 | 9.18275116957      |
| NM_032357    | CCDC115  | 847  | 975  | 9.7677136703       |
| NM_032353    | VPS25    | 779  | 875  | 4.4686266377       |
| NM_032353    | VPS25    | 637  | 685  | 4.88366413697      |
| NM_032353    | VPS25    | 446  | 485  | 2.79952492759      |
| NM_032353    | VPS25    | 171  | 222  | 2.87964653681      |
| NM_032353    | VPS25    | 525  | 572  | 3.79952492759      |
| NM_032353    | VPS25    | 80   | 162  | 4.46862640178      |
| NM_032353    | VPS25    | 391  | 443  | 4.46862663748      |
| NM_005789    | PSME3    | 2782 | 2871 | 6.00089861161      |
| NM_005789    | PSME3    | 2365 | 2403 | 5.41592937984      |
| NM_005789    | PSME3    | 1472 | 1537 | 5.41592937984      |
| NM_005789    | PSME3    | 961  | 1050 | 6.41593611089      |
| NM_005789    | PSME3    | 554  | 582  | 5.41593610334      |
| NM_005789    | PSME3    | 638  | 715  | 6.00089861161      |
| NM_005789    | PSME3    | 1755 | 1841 | 6.73786420578      |
| NM_005789    | PSME3    | 887  | 954  | 4.41593587497      |

|              |        |       |       |               |
|--------------|--------|-------|-------|---------------|
| NM_005789    | PSME3  | 1915  | 1997  | 4.41593587497 |
| NM_005789    | PSME3  | 1606  | 1675  | 5.41593587497 |
| NM_005789    | PSME3  | 2025  | 2103  | 4.41576236057 |
| NM_005789    | PSME3  | 2495  | 2613  | 7.41593611089 |
| NM_005789    | PSME3  | 441   | 553   | 6.41593611089 |
| NM_005789    | PSME3  | 1323  | 1437  | 6.41593611089 |
| NM_005789    | PSME3  | 739   | 882   | 6.73786420578 |
| NM_005789    | PSME3  | 2222  | 2337  | 6.73786420578 |
| NM_002788    | PSMA3  | 707   | 792   | 3.49509605002 |
| NM_002788    | PSMA3  | 828   | 871   | 3.49508931897 |
| NM_002788    | PSMA3  | 927   | 961   | 2.49508931897 |
| NM_002788    | PSMA3  | 454   | 698   | 6.08005855074 |
| NM_002788    | PSMA3  | 97    | 431   | 6.40198664563 |
| NM_002787    | PSMA2  | 820   | 907   | 7.11524890419 |
| NM_002787    | PSMA2  | 28    | 68    | 4.94515015243 |
| NM_002787    | PSMA2  | 70    | 287   | 8.80330489788 |
| NM_002787    | PSMA2  | 291   | 806   | 10.1741425932 |
| NM_177969    | PPM1B  | 463   | 518   | 7.32133150012 |
| NM_012388    | PLDN   | 492   | 540   | 5.89422429527 |
| NM_012388    | PLDN   | 3624  | 3689  | 6.48320416025 |
| NM_012388    | PLDN   | 1576  | 1622  | 4.81410268606 |
| NM_012388    | PLDN   | 1418  | 1493  | 4.89823516439 |
| NM_012388    | PLDN   | 858   | 897   | 5.81410268606 |
| NM_001039703 | NBPF10 | 9514  | 9557  | 8.6334761178  |
| NM_001039703 | NBPF10 | 8766  | 8823  | 9.04850688602 |
| NM_001039703 | NBPF10 | 8333  | 8384  | 7.0444960169  |
| NM_001039703 | NBPF10 | 4437  | 4496  | 8.6334761178  |
| NM_001039703 | NBPF10 | 3415  | 3480  | 9.37044171196 |
| NM_001039703 | NBPF10 | 2231  | 2323  | 9.85586853913 |
| NM_001039703 | NBPF10 | 2634  | 2734  | 9.37044171196 |
| NM_001039703 | NBPF10 | 2365  | 2443  | 9.85586853913 |
| NM_001039703 | NBPF10 | 4321  | 4390  | 8.04850688602 |
| NM_001039703 | NBPF10 | 8713  | 8765  | 8.6334761178  |
| NM_001039703 | NBPF10 | 5306  | 5376  | 8.63347588188 |
| NM_001039703 | NBPF10 | 6870  | 6920  | 7.04833986676 |
| NM_001039703 | NBPF10 | 3816  | 3865  | 8.04833986676 |
| NM_001039703 | NBPF10 | 7809  | 7858  | 8.04851361707 |
| NM_001039703 | NBPF10 | 9050  | 9116  | 8.0444960169  |
| NM_001039703 | NBPF10 | 5613  | 5676  | 8.04851360953 |
| NM_001039703 | NBPF10 | 7247  | 7301  | 8.04833986676 |
| NM_001039703 | NBPF10 | 3702  | 3764  | 9.85586853913 |
| NM_001039703 | NBPF10 | 4118  | 4208  | 9.6334761178  |
| NM_001039703 | NBPF10 | 10405 | 10496 | 8.6334761178  |
| NM_001039703 | NBPF10 | 9583  | 9638  | 7.0444960169  |
| NM_001039703 | NBPF10 | 2973  | 3022  | 9.04851361708 |
| NM_001039703 | NBPF10 | 7603  | 7636  | 8.0444960169  |
| NM_001039703 | NBPF10 | 8097  | 8179  | 9.6334761178  |
| NM_001039703 | NBPF10 | 3582  | 3641  | 8.6334761178  |
| NM_001039703 | NBPF10 | 9884  | 9965  | 8.63347588188 |
| NM_001039703 | NBPF10 | 2855  | 2909  | 8.63347611025 |

|              |         |       |       |               |
|--------------|---------|-------|-------|---------------|
| NM_001039703 | NBPF10  | 6005  | 6062  | 7.04833986676 |
| NM_001039703 | NBPF10  | 4830  | 4927  | 8.6334761178  |
| NM_001039703 | NBPF10  | 9464  | 9511  | 8.54933690841 |
| NM_001039703 | NBPF10  | 2471  | 2515  | 8.63347611757 |
| NM_001039703 | NBPF10  | 1902  | 2002  | 8.6334761178  |
| NM_001039703 | NBPF10  | 3062  | 3113  | 6.96437440769 |
| NM_001039703 | NBPF10  | 8181  | 8260  | 8.63347588188 |
| NM_001039703 | NBPF10  | 8502  | 8604  | 9.04851361708 |
| NM_001039703 | NBPF10  | 5783  | 5895  | 9.04851361708 |
| NM_001039703 | NBPF10  | 10508 | 10563 | 9.37044171196 |
| NM_001039703 | NBPF10  | 7365  | 7434  | 9.37044171196 |
| NM_001039703 | NBPF10  | 7302  | 7359  | 8.63346938674 |
| NM_001039703 | NBPF10  | 3655  | 3681  | 7.0444960169  |
| NM_001039703 | NBPF10  | 8829  | 8898  | 8.63347611779 |
| NM_001039703 | NBPF10  | 10308 | 10370 | 7.04850688602 |
| NM_001039703 | NBPF10  | 10007 | 10057 | 8.62945851762 |
| NM_001039703 | NBPF10  | 5906  | 5969  | 9.37044171196 |
| NM_001039703 | NBPF10  | 6294  | 6408  | 9.85586853913 |
| NM_001039703 | NBPF10  | 9668  | 9855  | 10.370441712  |
| NM_001039703 | NBPF10  | 1825  | 1879  | 7.0444960169  |
| NM_001039703 | NBPF10  | 2132  | 2217  | 9.04851361708 |
| NM_001039703 | NBPF10  | 747   | 823   | 8.63346938674 |
| NM_001039703 | NBPF10  | 9222  | 9336  | 9.37044171196 |
| NM_001039703 | NBPF10  | 7026  | 7126  | 9.37044171196 |
| NM_001039703 | NBPF10  | 5053  | 5238  | 10.2184386185 |
| NM_001039703 | NBPF10  | 6633  | 6708  | 9.6334761178  |
| NM_001039703 | NBPF10  | 6520  | 6609  | 8.6334761178  |
| NM_001039708 | SDCCAG3 | 2075  | 2153  | 6.41196098118 |
| NM_001039708 | SDCCAG3 | 1198  | 1262  | 4.09003288651 |
| NM_001039708 | SDCCAG3 | 938   | 1015  | 4.08601528634 |
| NM_001039708 | SDCCAG3 | 1873  | 2029  | 5.09003288651 |
| NM_001039708 | SDCCAG3 | 870   | 915   | 5.08601528634 |
| NM_001039708 | SDCCAG3 | 1508  | 1605  | 5.67499538724 |
| NM_001039708 | SDCCAG3 | 618   | 675   | 5.67482163692 |
| NM_177966    | PDE12   | 786   | 827   | 9.96379753684 |
| NM_177966    | PDE12   | 972   | 1146  | 9.38285263629 |
| NM_177966    | PDE12   | 1729  | 1849  | 9.96780840596 |
| NM_177966    | PDE12   | 1326  | 1430  | 8.38285263629 |
| NM_015508    | TIPARP  | 1840  | 1892  | 7.21371360447 |
| NM_015508    | TIPARP  | 278   | 318   | 8.21371360447 |
| NM_015508    | TIPARP  | 1352  | 1390  | 8.20986975461 |
| NM_015506    | MMACHC  | 1361  | 1415  | 7.78011086326 |
| NM_001040653 | ZXDC    | 1773  | 1808  | 7.76626969715 |
| NM_001040653 | ZXDC    | 1528  | 1613  | 7.76627642798 |
| NM_012381    | ORC3    | 933   | 984   | 4.83017539544 |
| NM_001034023 | DMAP1   | 566   | 625   | 6.86822714434 |
| NM_002435    | MPI     | 2178  | 2220  | 6.43339347054 |
| NM_002436    | MPP1    | 524   | 600   | 6.9819573958  |
| NM_002436    | MPP1    | 1642  | 1675  | 7.48278092306 |
| NM_002436    | MPP1    | 190   | 224   | 5.89781842234 |

|              |          |      |      |               |               |
|--------------|----------|------|------|---------------|---------------|
| NM_001034025 | ERP29    | 86   | 133  | 5.48939880183 |               |
| NM_001034025 | ERP29    | 933  | 1073 | 7.15850051193 |               |
| NM_001034025 | ERP29    | 507  | 930  | 9.82146552466 |               |
| NM_001034025 | ERP29    | 133  | 432  | 8.82146552466 |               |
| NM_001034025 | ERP29    | 449  | 501  | 5.57353801121 |               |
| NM_031953    | SNX25    | 265  | 321  | 5.68613065468 |               |
| NM_031953    | SNX25    | 155  | 225  | 7.27510402452 |               |
| NM_031954    | KCTD10   | 1290 | 1355 | 8.45509108489 |               |
| NM_052834    | WDR7     | 1816 | 1859 | 11.0617091442 |               |
| NM_052834    | WDR7     | 3688 | 3748 | 11.6506892451 |               |
| NM_052831    | C6orf192 |      | 1647 | 1736          | 10.7835967119 |
| NM_052831    | C6orf192 |      | 586  | 634           | 11.198634211  |
| NM_052831    | C6orf192 |      | 257  | 350           | 11.7835967119 |
| NM_052831    | C6orf192 |      | 2158 | 2207          | 9.19461661101 |
| NM_052831    | C6orf192 |      | 1319 | 1452          | 11.7835967119 |
| NM_052831    | C6orf192 |      | 1813 | 1861          | 10.6994575025 |
| NM_052831    | C6orf192 |      | 448  | 521           | 10.1986342112 |
| NM_052831    | C6orf192 |      | 870  | 1020          | 12.1986342112 |
| NM_052831    | C6orf192 |      | 636  | 730           | 11.7835967119 |
| NM_052831    | C6orf192 |      | 1115 | 1197          | 10.1986342112 |
| NM_052831    | C6orf192 |      | 360  | 447           | 11.5205623061 |
| NM_052831    | C6orf192 |      | 1466 | 1552          | 10.1986339753 |
| NM_052831    | C6orf192 |      | 2057 | 2129          | 10.1986339753 |
| NM_052831    | C6orf192 |      | 786  | 867           | 11.7835967117 |
| NM_003218    | TERF1    | 1116 | 1156 | 4.9189136648  |               |
| NM_003218    | TERF1    | 1497 | 1571 | 4.92275751466 |               |
| NM_014929    | FASTKD2  | 1353 | 1409 | 6.12517061353 |               |
| NM_014929    | FASTKD2  | 2299 | 2369 | 7.12516411839 |               |
| NM_014929    | FASTKD2  | 890  | 1004 | 6.71012661911 |               |
| NM_014929    | FASTKD2  | 1606 | 1672 | 5.12517084944 |               |
| NM_014929    | FASTKD2  | 1435 | 1494 | 7.12516411839 |               |
| NM_014929    | FASTKD2  | 1036 | 1103 | 7.12516411839 |               |
| NM_014929    | FASTKD2  | 1715 | 1854 | 6.71013335017 |               |
| NM_014929    | FASTKD2  | 1864 | 1997 | 7.71013335017 |               |
| NM_170738    | MRPL11   | 43   | 82   | 5.97891684058 |               |
| NM_170738    | MRPL11   | 332  | 380  | 6.55986847219 |               |
| NM_170738    | MRPL11   | 141  | 304  | 8.56388607236 |               |
| NM_170738    | MRPL11   | 671  | 759  | 6.97892357164 |               |
| NM_170738    | MRPL11   | 387  | 515  | 8.43835519027 |               |
| NM_001040110 | NRF1     | 2118 | 2171 | 9.02316201233 |               |
| NM_001040110 | NRF1     | 209  | 279  | 8.10328362154 |               |
| NM_001130100 | KIFC3    | 1076 | 1123 | 5.81046650911 |               |
| NM_001130100 | KIFC3    | 813  | 849  | 5.81046650911 |               |
| NM_001130100 | KIFC3    | 1517 | 1551 | 5.7303448999  |               |
| NM_001130100 | KIFC3    | 496  | 617  | 7.39944661    |               |
| NM_001130100 | KIFC3    | 1301 | 1367 | 5.81448410928 |               |
| NM_001130100 | KIFC3    | 3277 | 3371 | 8.62183903134 |               |
| NM_001130100 | KIFC3    | 1565 | 1639 | 5.81431035896 |               |
| NM_001130100 | KIFC3    | 1140 | 1189 | 6.7303448999  |               |
| NM_001130100 | HSPBP1   | 1240 | 1302 | 8.13168715835 |               |

|              |        |       |       |               |
|--------------|--------|-------|-------|---------------|
| NM_001130106 | HSPBP1 | 903   | 961   | 8.1316804273  |
| NM_001130106 | HSPBP1 | 483   | 520   | 8.13151340803 |
| NM_001130106 | HSPBP1 | 1078  | 1129  | 8.1316804273  |
| NM_001130106 | HSPBP1 | 967   | 1076  | 10.1316871584 |
| NM_001130106 | HSPBP1 | 1335  | 1424  | 8.13168715835 |
| NM_001130106 | HSPBP1 | 287   | 380   | 10.4536152532 |
| NM_001130106 | HSPBP1 | 687   | 761   | 9.13168715835 |
| NM_001130106 | HSPBP1 | 183   | 286   | 10.7166496591 |
| NM_001130106 | HSPBP1 | 1533  | 1650  | 10.1316871584 |
| NM_033004    | NLRP1  | 950   | 1011  | 12.2107591396 |
| NM_033004    | NLRP1  | 2758  | 2826  | 13.7957216479 |
| NM_033004    | NLRP1  | 4620  | 4661  | 13.210759147  |
| NM_033004    | NLRP1  | 2152  | 2210  | 12.210759147  |
| NM_033004    | NLRP1  | 5164  | 5218  | 12.1266199378 |
| NM_033004    | NLRP1  | 4522  | 4598  | 13.7957216479 |
| NM_033004    | NLRP1  | 4903  | 4941  | 12.206741547  |
| NM_033004    | NLRP1  | 3509  | 3567  | 13.210759147  |
| NM_033004    | NLRP1  | 3985  | 4067  | 13.2107591472 |
| NM_033004    | NLRP1  | 1465  | 1539  | 14.5326872421 |
| NM_033004    | NLRP1  | 2373  | 2429  | 13.2107524161 |
| NM_033004    | NLRP1  | 2978  | 3045  | 12.2107589113 |
| NM_033004    | NLRP1  | 1892  | 1959  | 13.2107591472 |
| NM_033004    | NLRP1  | 2449  | 2576  | 14.2107591472 |
| NM_033004    | NLRP1  | 1673  | 1736  | 12.2105853969 |
| NM_033004    | NLRP1  | 4265  | 4370  | 13.7957216479 |
| NM_033004    | NLRP1  | 3575  | 3694  | 12.2107591472 |
| NM_033004    | NLRP1  | 3065  | 3160  | 13.7957216404 |
| NM_033004    | NLRP1  | 3706  | 3882  | 14.7957216479 |
| NM_033004    | NLRP1  | 4393  | 4496  | 13.7957216479 |
| NM_033004    | NLRP1  | 3200  | 3465  | 15.0181140692 |
| NM_001040118 | ARAP1  | 4476  | 4543  | 5.83271363713 |
| NM_001040118 | ARAP1  | 2548  | 2618  | 6.83271387283 |
| NM_001040118 | ARAP1  | 1852  | 1890  | 6.82869627288 |
| NM_001040118 | ARAP1  | 2395  | 2488  | 7.83271363713 |
| NM_001040118 | ARAP1  | 1276  | 1344  | 6.83254012273 |
| NM_001040118 | ARAP1  | 3060  | 3119  | 5.74857466367 |
| NM_001040118 | ARAP1  | 2622  | 2690  | 5.832707142   |
| NM_001146345 | PQLC1  | 1192  | 1241  | 6.88227784088 |
| NM_001146345 | PQLC1  | 2365  | 2401  | 6.88227784088 |
| NM_001146345 | PQLC1  | 512   | 593   | 6.213176131   |
| NM_001146345 | PQLC1  | 2294  | 2346  | 6.87826024093 |
| NM_001204    | BMP2   | 5385  | 5470  | 6.92472192521 |
| NM_001204    | BMP2   | 6161  | 6228  | 5.92454818244 |
| NM_001204    | BMP2   | 6336  | 6385  | 7.50951068316 |
| NM_001204    | BMP2   | 2168  | 2236  | 7.92472193275 |
| NM_001204    | BMP2   | 779   | 828   | 6.92472169684 |
| NM_001204    | BMP2   | 2275  | 2390  | 7.50968443348 |
| NM_001204    | BMP2   | 11482 | 11545 | 6.92070433259 |
| NM_001204    | BMP2   | 6396  | 6461  | 7.92472193276 |
| NM_001204    | BMP2   | 3363  | 3433  | 5.92070433259 |

|           |         |      |      |               |
|-----------|---------|------|------|---------------|
| NM_001204 | BMPR2   | 4638 | 4797 | 8.50968443348 |
| NM_001204 | BMPR2   | 572  | 608  | 5.84058272338 |
| NM_001204 | BMPR2   | 1631 | 1740 | 5.92454818244 |
| NM_001204 | BMPR2   | 1366 | 1456 | 6.92454818244 |
| NM_022118 | RBM26   | 3860 | 3928 | 6.90208446322 |
| NM_022118 | RBM26   | 1146 | 1225 | 6.90208447077 |
| NM_022118 | RBM26   | 582  | 653  | 6.90208423485 |
| NM_022118 | RBM26   | 1824 | 1919 | 6.3171219625  |
| NM_022118 | RBM26   | 1620 | 1677 | 6.31712197005 |
| NM_022118 | RBM26   | 2985 | 3069 | 5.31310436988 |
| NM_022118 | RBM26   | 2798 | 2875 | 6.31712196983 |
| NM_022118 | RBM26   | 3307 | 3433 | 7.31712197005 |
| NM_022117 | TSPYL2  | 1510 | 1598 | 4.36710705543 |
| NM_022117 | TSPYL2  | 1954 | 2046 | 4.36710705544 |
| NM_022116 | FIGNL1  | 263  | 364  | 9.66405681141 |
| NM_022116 | FIGNL1  | 615  | 694  | 8.92709120969 |
| NM_022116 | FIGNL1  | 2346 | 2391 | 8.25798950713 |
| NM_022116 | FIGNL1  | 174  | 223  | 8.92307361707 |
| NM_022116 | FIGNL1  | 784  | 845  | 8.92709121702 |
| NM_022116 | FIGNL1  | 1438 | 1510 | 7.3419549662  |
| NM_022116 | FIGNL1  | 2897 | 2942 | 7.33811111635 |
| NM_022116 | FIGNL1  | 2297 | 2340 | 8.92709098132 |
| NM_022116 | FIGNL1  | 3226 | 3294 | 8.34212871652 |
| NM_022116 | FIGNL1  | 3392 | 3474 | 7.25798950713 |
| NM_022116 | FIGNL1  | 1512 | 1562 | 8.25798950713 |
| NM_022116 | FIGNL1  | 736  | 780  | 8.33811111635 |
| NM_022116 | FIGNL1  | 845  | 907  | 8.34212870897 |
| NM_022116 | FIGNL1  | 911  | 1018 | 7.33811111635 |
| NM_022111 | CLSPN   | 3126 | 3173 | 7.6220051474  |
| NM_022111 | CLSPN   | 1540 | 1587 | 7.62183812813 |
| NM_022111 | CLSPN   | 5942 | 5983 | 7.61799427828 |
| NM_022111 | CLSPN   | 3855 | 3896 | 8.62201164253 |
| NM_022111 | CLSPN   | 4825 | 4871 | 8.61799427828 |
| NM_022111 | CLSPN   | 1707 | 1769 | 9.20696764812 |
| NM_022111 | CLSPN   | 1779 | 1838 | 8.53787266907 |
| NM_022111 | CLSPN   | 2255 | 2336 | 8.6220051474  |
| NM_022111 | CLSPN   | 3350 | 3424 | 8.62183812813 |
| NM_030927 | TSPAN14 | 534  | 614  | 6.93304803125 |
| NM_030927 | TSPAN14 | 1033 | 1089 | 8.93304803125 |
| NM_030927 | TSPAN14 | 5094 | 5125 | 6.93287428093 |
| NM_030927 | TSPAN14 | 99   | 156  | 8.93304803125 |
| NM_030927 | TSPAN14 | 834  | 887  | 6.9330480237  |
| NM_030927 | TSPAN14 | 688  | 730  | 8.51399293179 |
| NM_030927 | TSPAN14 | 3568 | 3629 | 8.43387132258 |
| NM_030927 | TSPAN14 | 171  | 247  | 9.25497612613 |
| NM_030927 | TSPAN14 | 2236 | 2266 | 7.93287428093 |
| NM_030927 | TSPAN14 | 1737 | 1818 | 8.51801053197 |
| NM_030927 | TSPAN14 | 3158 | 3214 | 6.92903043107 |
| NM_030927 | TSPAN14 | 3266 | 3330 | 6.84890882186 |
| NM_030927 | TSPAN14 | 2474 | 2551 | 6.93304803125 |

|           |         |      |      |                   |
|-----------|---------|------|------|-------------------|
| NM_030927 | TSPAN14 | 329  | 444  | 10.1029730327     |
| NM_030927 | TSPAN14 | 1114 | 1180 | 6.92903043107     |
| NM_030927 | TSPAN14 | 2275 | 2429 | 8.93304803125     |
| NM_030927 | TSPAN14 | 1859 | 2007 | 8.93304803125     |
| NM_030926 | ITM2C   | 302  | 380  | 6.84899149776     |
| NM_030926 | ITM2C   | 1377 | 1449 | 5.84899149776     |
| NM_030926 | ITM2C   | 1306 | 1354 | 5.84898476671     |
| NM_030926 | ITM2C   | 1161 | 1219 | 7.17091959265     |
| NM_030926 | ITM2C   | 1552 | 1608 | 4.84899149776     |
| NM_030926 | ITM2C   | 845  | 914  | 5.84899149776     |
| NM_030926 | ITM2C   | 1088 | 1132 | 6.43394726743     |
| NM_030926 | ITM2C   | 1646 | 1687 | 4.84881774744     |
| NM_030926 | ITM2C   | 934  | 1085 | 9.3084231164      |
| NM_030926 | ITM2C   | 407  | 698  | 9.60387899993     |
| NM_030926 | ITM2C   | 1708 | 2061 | 9.24130892054     |
| NM_030922 | NIPA2   | 786  | 846  | 10.0101619106     |
| NM_030922 | NIPA2   | 1065 | 1107 | 8.20280675263     |
| NM_030922 | NIPA2   | 2308 | 2357 | 8.78776948172     |
| NM_030922 | NIPA2   | 174  | 245  | 8.20280698855     |
| NM_030922 | NIPA2   | 1331 | 1401 | 8.78776948927     |
| NM_030922 | NIPA2   | 2413 | 2489 | 8.20280698855     |
| NM_030922 | NIPA2   | 953  | 1015 | 9.20280698855     |
| NM_030922 | NIPA2   | 2494 | 2525 | 7.11866777917     |
| NM_030922 | NIPA2   | 1433 | 1571 | 11.2028069886     |
| NM_030922 | NIPA2   | 1121 | 1329 | 10.6622386072     |
| NM_030922 | NIPA2   | 1625 | 1790 | 10.9032467067     |
| NM_030922 | NIPA2   | 2130 | 2246 | 8.78776948927     |
| NM_030922 | NIPA2   | 2013 | 2125 | 8.20280698854     |
| NM_030922 | NIPA2   | 392  | 725  | 11.5951244113     |
| NM_021138 | TRAF2   | 1025 | 1099 | 8.0122937101      |
| NM_021138 | TRAF2   | 1530 | 1573 | 7.0122937101      |
| NM_021138 | TRAF2   | 1212 | 1267 | 7.01229370255     |
| NM_021138 | TRAF2   | 246  | 298  | 7.00827610992     |
| NM_021139 | UGT2B4  | 1944 | 2081 | 10.5057111044     |
| NM_021139 | UGT2B4  | 1855 | 1903 | 8.28331868311     |
| NM_021139 | UGT2B4  | 6    | 1846 | 15.2297376429     |
| NM_021137 | TNFAIP1 | 501  | 574  | 7.22174609488     |
| NM_021137 | TNFAIP1 | 2890 | 2947 | 7.30186770409     |
| NM_021137 | TNFAIP1 | 3361 | 3460 | 7.89084780498     |
| NM_021137 | TNFAIP1 | 1563 | 1628 | 6.30186770409     |
| NM_021137 | TNFAIP1 | 3284 | 3340 | 7.30186770409     |
| NM_021137 | TNFAIP1 | 789  | 865  | 7.30587857321     |
| NM_021137 | TNFAIP1 | 2240 | 2292 | 6.30186770409     |
| NM_021137 | TNFAIP1 | 621  | 697  | 7.89084780498     |
| NM_021134 | MRPL23  | 419  | 467  | 3.72988279787     |
| NM_021130 | PPIA    | 810  | 861  | 1.57960847096     |
| NM_021130 | PPIA    | 1515 | 1565 | -0.0053605248947  |
| NM_021130 | PPIA    | 1632 | 1698 | 0.990628605986    |
| NM_021130 | PPIA    | 1314 | 1349 | -0.00937139401402 |
| NM_021130 | PPIA    | 1897 | 2002 | 1.57960869933     |

|           |         |      |      |               |
|-----------|---------|------|------|---------------|
| NM_021130 | PPIA    | 2081 | 2193 | 3.1645712076  |
| NM_021130 | PPIA    | 939  | 993  | 0.99464597024 |
| NM_021130 | PPIA    | 41   | 772  | 7.2425737196  |
| NM_030928 | CDT1    | 1489 | 1542 | 8.69261937893 |
| NM_030928 | CDT1    | 2566 | 2661 | 8.69261937893 |
| NM_030928 | CDT1    | 1544 | 1604 | 8.69261915056 |
| NM_030928 | CDT1    | 1820 | 1896 | 8.68860178631 |
| NM_030928 | CDT1    | 1401 | 1459 | 8.68860178631 |
| NM_030928 | CDT1    | 709  | 742  | 9.60848017709 |
| NM_030928 | CDT1    | 2416 | 2460 | 8.60848017709 |
| NM_030928 | CDT1    | 253  | 279  | 8.60848017709 |
| NM_030928 | CDT1    | 2177 | 2238 | 8.69261265542 |
| NM_022157 | RRAGC   | 535  | 593  | 9.24075523017 |
| NM_022157 | RRAGC   | 1168 | 1220 | 6.91865338518 |
| NM_022157 | RRAGC   | 2551 | 2644 | 6.9188271355  |
| NM_022157 | RRAGC   | 1018 | 1139 | 8.9188271355  |
| NM_022157 | RRAGC   | 1761 | 1863 | 8.49977203605 |
| NM_138496 | CYHR1   | 393  | 452  | 7.42915986714 |
| NM_148170 | CTSC    | 41   | 100  | 7.92552967973 |
| NM_148170 | CTSC    | 2967 | 3000 | 5.11817452175 |
| NM_148170 | CTSC    | 3768 | 3817 | 6.11817475012 |
| NM_148170 | CTSC    | 742  | 817  | 5.11800100735 |
| NM_148170 | CTSC    | 3193 | 3263 | 6.70313725839 |
| NM_148170 | CTSC    | 3998 | 4039 | 6.11817475767 |
| NM_148170 | CTSC    | 686  | 729  | 6.11816802662 |
| NM_148170 | CTSC    | 3348 | 3380 | 6.11800100735 |
| NM_148170 | CTSC    | 101  | 561  | 10.9761557528 |
| NM_148172 | PEMT    | 322  | 404  | 9.36282374107 |
| NM_148172 | PEMT    | 155  | 206  | 8.36265022667 |
| NM_148172 | PEMT    | 498  | 585  | 8.94778647771 |
| NM_138493 | CCDC167 | 282  | 372  | 8.54047148049 |
| NM_019080 | NDFIP2  | 495  | 563  | 9.68842428309 |
| NM_019080 | NDFIP2  | 1423 | 1483 | 7.10346178237 |
| NM_019080 | NDFIP2  | 1195 | 1236 | 7.10345505131 |
| NM_019080 | NDFIP2  | 1491 | 1561 | 8.42538987725 |
| NM_019080 | NDFIP2  | 2170 | 2223 | 7.68825053277 |
| NM_019080 | NDFIP2  | 2366 | 2424 | 7.68825053277 |
| NM_019080 | NDFIP2  | 417  | 465  | 6.01932257298 |
| NM_019080 | NDFIP2  | 1325 | 1370 | 6.09944418219 |
| NM_019080 | NDFIP2  | 1566 | 1660 | 7.10346178237 |
| NM_019080 | NDFIP2  | 2247 | 2312 | 7.68842428309 |
| NM_019080 | NDFIP2  | 607  | 738  | 7.10346178237 |
| NM_019080 | NDFIP2  | 787  | 1183 | 11.5953148787 |
| NM_019082 | DDX56   | 1324 | 1370 | 5.00775808326 |
| NM_019082 | DDX56   | 1372 | 1515 | 7.59289433429 |
| NM_019082 | DDX56   | 939  | 1017 | 6.59289433407 |
| NM_019082 | DDX56   | 1891 | 2093 | 8.70837155171 |
| NM_019082 | DDX56   | 1793 | 1882 | 5.00792510252 |
| NM_019082 | DDX56   | 2108 | 2154 | 6.0039142334  |
| NM_019082 | DDX56   | 1620 | 1792 | 7.81528675563 |



|              |         |      |      |               |
|--------------|---------|------|------|---------------|
| NM_019082    | DDX56   | 1539 | 1608 | 6.59289433429 |
| NM_019082    | DDX56   | 2246 | 2387 | 7.00793183357 |
| NM_019082    | DDX56   | 1071 | 1282 | 9.09539467482 |
| NM_019082    | DDX56   | 641  | 822  | 7.59289433429 |
| NM_138499    | PWWP2B  | 1619 | 1703 | 8.30680228014 |
| NM_138499    | PWWP2B  | 1823 | 1902 | 10.3068025161 |
| NM_138499    | PWWP2B  | 1145 | 1217 | 9.89176478086 |
| NM_199162    | ADPRHL1 | 907  | 969  | 10.1875790603 |
| NM_014597    | DNTTIP2 | 898  | 982  | 4.10314632866 |
| NM_014597    | DNTTIP2 | 1283 | 1334 | 5.09912896441 |
| NM_014597    | DNTTIP2 | 2013 | 2090 | 5.10313983353 |
| NM_014597    | DNTTIP2 | 781  | 864  | 5.0190073552  |
| NM_014597    | DNTTIP2 | 177  | 249  | 4.09912896441 |
| NM_014597    | DNTTIP2 | 1410 | 1548 | 5.6881090653  |
| NM_014597    | DNTTIP2 | 19   | 155  | 6.10314656458 |
| NM_014597    | DNTTIP2 | 2165 | 2280 | 6.42507465947 |
| NM_014597    | DNTTIP2 | 1096 | 1172 | 5.10314656436 |
| NM_203434    | IER5L   | 929  | 966  | 8.56157590696 |
| NM_182498    | ZNF428  | 324  | 396  | 9.437905449   |
| NM_182498    | ZNF428  | 513  | 612  | 10.437905449  |
| NM_182498    | ZNF428  | 1048 | 1140 | 9.437905449   |
| NM_020846    | SLAIN2  | 1062 | 1108 | 6.13134743938 |
| NM_020846    | SLAIN2  | 3094 | 3157 | 6.7164834545  |
| NM_020846    | SLAIN2  | 1845 | 1894 | 6.7164834545  |
| NM_020846    | SLAIN2  | 1518 | 1604 | 6.13152118948 |
| NM_182491    | ZFAND2A | 535  | 580  | 5.3123956197  |
| NM_182491    | ZFAND2A | 444  | 489  | 4.64329414551 |
| NM_182491    | ZFAND2A | 259  | 300  | 4.72341575472 |
| NM_001005745 | NUMB    | 787  | 847  | 5.7117663866  |
| NM_001005745 | NUMB    | 575  | 623  | 4.71175966309 |
| NM_001005745 | NUMB    | 2055 | 2114 | 6.71176639414 |
| NM_001005745 | NUMB    | 3305 | 3388 | 5.71176639414 |
| NM_001005745 | NUMB    | 2325 | 2377 | 7.29672889487 |
| NM_001005745 | NUMB    | 1427 | 1469 | 4.62762718476 |
| NM_001005745 | NUMB    | 444  | 524  | 5.70774879397 |
| NM_001005745 | NUMB    | 676  | 726  | 4.70774879397 |
| NM_001005745 | NUMB    | 920  | 1089 | 5.71176639414 |
| NM_017623    | CNNM3   | 798  | 849  | 7.33870959291 |
| NM_017623    | CNNM3   | 1089 | 1166 | 8.92367209363 |
| NM_017623    | CNNM3   | 2526 | 2565 | 7.91965449346 |
| NM_017623    | CNNM3   | 2268 | 2319 | 7.92367209363 |
| NM_017623    | CNNM3   | 1191 | 1248 | 7.92367209363 |
| NM_017623    | CNNM3   | 119  | 161  | 6.33469199274 |
| NM_017623    | CNNM3   | 1710 | 1767 | 7.92367209363 |
| NM_017623    | CNNM3   | 535  | 584  | 6.25457038353 |
| NM_017623    | CNNM3   | 3900 | 3935 | 6.33853584259 |
| NM_017623    | CNNM3   | 1770 | 1808 | 6.33853584259 |
| NM_017623    | CNNM3   | 2706 | 2819 | 6.33870959291 |
| NM_017623    | CNNM3   | 2899 | 2952 | 6.33469199274 |
| NM_017623    | CNNM3   | 1623 | 1668 | 6.25457038353 |

|           |          |      |      |               |               |
|-----------|----------|------|------|---------------|---------------|
| NM_017623 | CNNM3    | 2469 | 2523 | 8.33870958536 |               |
| NM_017623 | CNNM3    | 925  | 1034 | 8.33870959291 |               |
| NM_017623 | CNNM3    | 1885 | 2048 | 9.6606376878  |               |
| NM_017623 | CNNM3    | 1530 | 1598 | 7.33870958536 |               |
| NM_017623 | CNNM3    | 1347 | 1520 | 9.50863459435 |               |
| NM_017629 | EIF2C4   | 5954 | 5996 | 6.78255587571 |               |
| NM_019884 | GSK3A    | 1105 | 1143 | 6.18837784479 |               |
| NM_019884 | GSK3A    | 1478 | 1543 | 7.27251705417 |               |
| NM_019884 | GSK3A    | 768  | 806  | 7.85346195473 |               |
| NM_019884 | GSK3A    | 560  | 711  | 8.59444514906 |               |
| NM_019884 | GSK3A    | 476  | 559  | 7.85747955468 |               |
| NM_019884 | GSK3A    | 1326 | 1450 | 9.44244205562 |               |
| NM_019884 | GSK3A    | 841  | 1058 | 9.73194867281 |               |
| NM_019887 | DIABLO   | 875  | 934  | 5.80891662482 |               |
| NM_012238 | SIRT1    | 1473 | 1545 | 5.87024642852 |               |
| NM_004494 | HDGF     | 1524 | 1554 | 2.4899501327  |               |
| NM_004494 | HDGF     | 895  | 950  | 2.57408910617 |               |
| NM_004494 | HDGF     | 1556 | 1613 | 4.15905184281 |               |
| NM_004494 | HDGF     | 696  | 880  | 5.57408934209 |               |
| NM_004494 | HDGF     | 1022 | 1242 | 6.38144426414 |               |
| NM_004494 | HDGF     | 1652 | 1894 | 7.03352096072 |               |
| NM_004494 | HDGF     | 2117 | 2379 | 8.00035409679 |               |
| NM_004494 | HDGF     | 1249 | 1488 | 7.27452906023 |               |
| NM_004494 | HDGF     | 1902 | 2115 | 7.15905184281 |               |
| NM_004494 | HDGF     | 463  | 670  | 5.89601743697 |               |
| NM_004494 | HDGF     | 320  | 449  | 6.27452906023 |               |
| NM_012235 | SCAP     | 1299 | 1385 | 7.91435983215 |               |
| NM_012235 | SCAP     | 3615 | 3655 | 5.9143598246  |               |
| NM_012235 | SCAP     | 1092 | 1136 | 5.91435959623 |               |
| NM_012235 | SCAP     | 3839 | 3872 | 6.91034223198 |               |
| NM_012235 | SCAP     | 620  | 688  | 5.9143598246  |               |
| NM_012235 | SCAP     | 2205 | 2269 | 7.49914858255 |               |
| NM_012235 | SCAP     | 3507 | 3614 | 5.91435983215 |               |
| NM_012235 | SCAP     | 1042 | 1075 | 7.41518312349 |               |
| NM_012235 | SCAP     | 2718 | 2768 | 6.9143531011  |               |
| NM_012235 | SCAP     | 526  | 612  | 7.91435983215 |               |
| NM_012235 | SCAP     | 3879 | 3975 | 7.49932233287 |               |
| NM_012235 | SCAP     | 1226 | 1291 | 6.9143531011  |               |
| NM_012235 | SCAP     | 3260 | 3357 | 8.49932233287 |               |
| NM_012235 | SCAP     | 1812 | 1907 | 8.23628792704 |               |
| NM_012235 | SCAP     | 833  | 939  | 6.91435983215 |               |
| NM_012235 | SCAP     | 749  | 820  | 7.49914858255 |               |
| NM_012235 | SCAP     | 1431 | 1649 | 9.49932233287 |               |
| NM_012235 | SCAP     | 211  | 484  | 8.72171475421 |               |
| NM_012233 | RAB3GAP1 |      | 1539 | 1585          | 4.65196965357 |
| NM_012233 | RAB3GAP1 |      | 1063 | 1135          | 6.97791534863 |
| NM_012233 | RAB3GAP1 |      | 518  | 597           | 5.65598052269 |
| NM_012233 | RAB3GAP1 |      | 842  | 883           | 5.57184804436 |
| NM_012233 | RAB3GAP1 |      | 3304 | 3365          | 4.65196965357 |
| NM_012233 | RAB3GAP1 |      | 1358 | 1405          | 5.65598052269 |

|           |          |      |      |               |
|-----------|----------|------|------|---------------|
| NM_012233 | RAB3GAP1 | 130  | 186  | 5.65598052269 |
| NM_012233 | RAB3GAP1 | 1798 | 1870 | 4.65598701783 |
| NM_012233 | RAB3GAP1 | 3512 | 3561 | 4.65196965357 |
| NM_004491 | ARHGAP35 | 1614 | 1663 | 5.38883726852 |
| NM_004491 | ARHGAP35 | 7518 | 7582 | 6.39285486869 |
| NM_004491 | ARHGAP35 | 8394 | 8468 | 5.97781713349 |
| NM_004491 | ARHGAP35 | 690  | 736  | 6.39285486869 |
| NM_004491 | ARHGAP35 | 1544 | 1580 | 4.38883726852 |
| NM_004491 | ARHGAP35 | 962  | 1025 | 5.38883726852 |
| NM_004491 | ARHGAP35 | 2419 | 2516 | 6.97781736941 |
| NM_004491 | ARHGAP35 | 6000 | 6069 | 6.39285486869 |
| NM_004491 | ARHGAP35 | 5775 | 5814 | 6.30871565931 |
| NM_004491 | ARHGAP35 | 374  | 471  | 6.71478296358 |
| NM_004491 | ARHGAP35 | 3735 | 3788 | 5.39285486869 |
| NM_004491 | ARHGAP35 | 4099 | 4151 | 4.39268111837 |
| NM_004491 | ARHGAP35 | 2845 | 2909 | 5.39285486847 |
| NM_004491 | ARHGAP35 | 1833 | 1913 | 7.39285486869 |
| NM_004491 | ARHGAP35 | 2322 | 2416 | 7.39285486869 |
| NM_004491 | ARHGAP35 | 2760 | 2799 | 4.38883726852 |
| NM_004491 | ARHGAP35 | 485  | 556  | 6.71478296358 |
| NM_004491 | ARHGAP35 | 1367 | 1443 | 5.39285486114 |
| NM_004491 | ARHGAP35 | 7270 | 7306 | 4.39284813764 |
| NM_004491 | ARHGAP35 | 5564 | 5641 | 5.39285486869 |
| NM_004491 | ARHGAP35 | 8300 | 8375 | 5.97781736941 |
| NM_004491 | ARHGAP35 | 3239 | 3323 | 6.97781736941 |
| NM_004491 | ARHGAP35 | 819  | 877  | 4.38883726852 |
| NM_004491 | ARHGAP35 | 1700 | 1827 | 6.71478296358 |
| NM_004491 | ARHGAP35 | 2631 | 2733 | 7.20020979075 |
| NM_004491 | ARHGAP35 | 5725 | 5775 | 4.38883726852 |
| NM_004491 | ARHGAP35 | 221  | 351  | 7.20020979075 |
| NM_004491 | ARHGAP35 | 6505 | 6566 | 4.39285486847 |
| NM_004491 | ARHGAP35 | 583  | 636  | 6.39285486869 |
| NM_004491 | ARHGAP35 | 1171 | 1247 | 5.97781736941 |
| NM_004491 | ARHGAP35 | 8485 | 8575 | 5.39285486869 |
| NM_004491 | ARHGAP35 | 3486 | 3539 | 5.89367816003 |
| NM_004491 | ARHGAP35 | 4692 | 4737 | 5.38883726852 |
| NM_004491 | ARHGAP35 | 2193 | 2313 | 6.71478296358 |
| NM_004491 | ARHGAP35 | 4512 | 4571 | 4.39284813764 |
| NM_004491 | ARHGAP35 | 7308 | 7406 | 6.39285486869 |
| NM_004491 | ARHGAP35 | 2996 | 3115 | 6.39285486869 |
| NM_004491 | ARHGAP35 | 3352 | 3433 | 5.97781736941 |
| NM_004491 | ARHGAP35 | 895  | 958  | 4.39268111837 |
| NM_004491 | ARHGAP35 | 6238 | 6397 | 7.97781736941 |
| NM_004491 | ARHGAP35 | 4156 | 4305 | 6.71478296358 |
| NM_004491 | ARHGAP35 | 1249 | 1328 | 5.39285486869 |
| NM_004491 | ARHGAP35 | 16   | 203  | 7.56277987013 |
| NM_004491 | ARHGAP35 | 6898 | 7012 | 6.39285486869 |
| NM_004491 | ARHGAP35 | 5215 | 5291 | 4.39285486869 |
| NM_004491 | ARHGAP35 | 3794 | 4051 | 7.97781736941 |
| NM_004491 | ARHGAP35 | 7083 | 7163 | 6.39285486869 |

|              |          |      |      |               |               |
|--------------|----------|------|------|---------------|---------------|
| NM_004491    | ARHGAP35 |      | 5815 | 5950          | 5.39285486869 |
| NM_004491    | ARHGAP35 |      | 1090 | 1165          | 5.39285486869 |
| NM_004491    | ARHGAP35 |      | 6753 | 6839          | 4.39285486114 |
| NM_004491    | ARHGAP35 |      | 7584 | 7649          | 5.39284813764 |
| NM_004491    | ARHGAP35 |      | 7014 | 7075          | 5.39285486869 |
| NM_004491    | ARHGAP35 |      | 4806 | 4914          | 5.39285486869 |
| NM_004491    | ARHGAP35 |      | 4981 | 5149          | 7.39285486869 |
| NM_004492    | GTF2A2   | 350  | 427  | 9.24015348062 |               |
| NM_004492    | GTF2A2   | 575  | 686  | 8.97711907479 |               |
| NM_152243    | CDC42EP1 |      | 1523 | 1593          | 7.42868245009 |
| NM_152243    | CDC42EP1 |      | 1246 | 1300          | 6.42867571904 |
| NM_152243    | CDC42EP1 |      | 1759 | 1837          | 8.01364495081 |
| NM_152243    | CDC42EP1 |      | 147  | 281           | 8.75061054498 |
| NM_152243    | CDC42EP1 |      | 55   | 93            | 7.42850869977 |
| NM_152243    | CDC42EP1 |      | 819  | 1055          | 10.8209998729 |
| NM_152243    | CDC42EP1 |      | 709  | 819           | 8.01364495081 |
| NM_001031617 | COX19    | 650  | 690  | 4.46013778386 |               |
| NM_001031617 | COX19    | 2270 | 2351 | 4.46013778386 |               |
| NM_001031617 | COX19    | 276  | 351  | 4.46014450736 |               |
| NM_000551    | VHL      | 661  | 718  | 6.97614842371 |               |
| NM_000551    | VHL      | 575  | 650  | 5.39135966576 |               |
| NM_000551    | VHL      | 883  | 942  | 6.97230457385 |               |
| NM_000551    | VHL      | 1459 | 1600 | 6.97632217403 |               |
| NM_133443    | GPT2     | 1962 | 2043 | 3.42689889398 |               |
| NM_133443    | GPT2     | 630  | 697  | 3.4268988942  |               |
| NM_133443    | GPT2     | 2198 | 2236 | 2.42672514388 |               |
| NM_133443    | GPT2     | 700  | 842  | 5.59682389564 |               |
| NM_133443    | GPT2     | 1246 | 1360 | 4.4268988942  |               |
| NM_133443    | GPT2     | 1412 | 1561 | 3.4268988942  |               |
| NM_006929    | SKIV2L   | 2962 | 3014 | 6.41466208101 |               |
| NM_006929    | SKIV2L   | 1939 | 1976 | 6.33069662194 |               |
| NM_006929    | SKIV2L   | 3343 | 3385 | 7.41482910027 |               |
| NM_006929    | SKIV2L   | 1346 | 1394 | 7.33069662194 |               |
| NM_006929    | SKIV2L   | 1029 | 1102 | 6.41482910027 |               |
| NM_006929    | SKIV2L   | 2751 | 2852 | 7.41483582377 |               |
| NM_006929    | SKIV2L   | 1718 | 1830 | 7.41483583132 |               |
| NM_006929    | SKIV2L   | 3773 | 3903 | 7.41483583132 |               |
| NM_006929    | SKIV2L   | 878  | 1011 | 8.41483583132 |               |
| NM_133446    | AGAP4    | 2106 | 2205 | 9.37805559397 |               |
| NM_181521    | CMTM4    | 641  | 680  | 9.27112615757 |               |
| NM_181521    | CMTM4    | 1064 | 1108 | 8.68616365684 |               |
| NM_181521    | CMTM4    | 5152 | 5237 | 9.69017452596 |               |
| NM_181521    | CMTM4    | 436  | 502  | 9.69018125702 |               |
| NM_181521    | CMTM4    | 838  | 920  | 9.69018124947 |               |
| NM_181521    | CMTM4    | 7708 | 7767 | 8.69018124947 |               |
| NM_181521    | CMTM4    | 4329 | 4380 | 8.69017452596 |               |
| NM_181521    | CMTM4    | 549  | 622  | 9.69018125702 |               |
| NM_181521    | CMTM4    | 6842 | 6914 | 8.6901810211  |               |
| NM_182729    | TXNRD1   | 671  | 728  | 5.22412204147 |               |
| NM_182729    | TXNRD1   | 1828 | 1931 | 6.03147696353 |               |

|           |         |      |      |                |
|-----------|---------|------|------|----------------|
| NM_182729 | TXNRD1  | 3326 | 3399 | 5.54605013636  |
| NM_182729 | TXNRD1  | 343  | 403  | 4.22412204147  |
| NM_182729 | TXNRD1  | 2667 | 2731 | 4.8090845422   |
| NM_182729 | TXNRD1  | 2383 | 2459 | 5.54605013636  |
| NM_182729 | TXNRD1  | 2882 | 2942 | 5.54605013614  |
| NM_182729 | TXNRD1  | 2095 | 2130 | 4.80891079188  |
| NM_182729 | TXNRD1  | 2461 | 2507 | 4.80908430628  |
| NM_182729 | TXNRD1  | 1246 | 1296 | 5.22412180556  |
| NM_182729 | TXNRD1  | 3790 | 3841 | 5.22412203392  |
| NM_182729 | TXNRD1  | 1781 | 1823 | 4.2201044413   |
| NM_182729 | TXNRD1  | 3123 | 3173 | 5.22412204147  |
| NM_182729 | TXNRD1  | 3644 | 3729 | 4.80908454219  |
| NM_182729 | TXNRD1  | 736  | 770  | 4.13998283209  |
| NM_182729 | TXNRD1  | 773  | 974  | 7.31158488272  |
| NM_182729 | TXNRD1  | 3175 | 3236 | 3.22412204147  |
| NM_182729 | TXNRD1  | 415  | 519  | 6.03147696353  |
| NM_182729 | TXNRD1  | 1132 | 1245 | 7.13101263708  |
| NM_182729 | TXNRD1  | 2555 | 2618 | 5.54604990044  |
| NM_182729 | TXNRD1  | 1937 | 1981 | 4.80907781114  |
| NM_182729 | TXNRD1  | 541  | 657  | 5.8090845422   |
| NM_182729 | TXNRD1  | 2238 | 2296 | 4.80908453465  |
| NM_182729 | TXNRD1  | 1414 | 1761 | 6.92456175962  |
| NM_182729 | TXNRD1  | 3730 | 3784 | 3.2201044413   |
| NM_181523 | PIK3R1  | 505  | 547  | 6.46546541423  |
| NM_181523 | PIK3R1  | 4976 | 5023 | 5.46546541423  |
| NM_181523 | PIK3R1  | 3634 | 3680 | 6.46162156437  |
| NM_006923 | SDF2    | 566  | 627  | 6.85645230789  |
| NM_006923 | SDF2    | 1051 | 1171 | 7.85662605821  |
| NM_006923 | SDF2    | 386  | 511  | 8.1785541531   |
| NM_006923 | SDF2    | 650  | 831  | 10.248943481   |
| NM_006923 | SDF2    | 260  | 351  | 8.44158855893  |
| NM_006923 | SDF2    | 1171 | 1298 | 6.85662605821  |
| NM_144718 | SPICE1  | 1466 | 1506 | 6.47408487704  |
| NM_006927 | ST3GAL2 | 696  | 752  | 9.43908116346  |
| NM_006927 | ST3GAL2 | 1677 | 1737 | 9.4350637992   |
| NM_006927 | ST3GAL2 | 628  | 693  | 9.4350637992   |
| NM_006927 | ST3GAL2 | 1594 | 1658 | 8.43908139183  |
| NM_006924 | SRSF1   | 911  | 1007 | 4.5471070248   |
| NM_006924 | SRSF1   | 554  | 620  | 3.73975210274  |
| NM_006924 | SRSF1   | 2071 | 2133 | 1.73975210274  |
| NM_006924 | SRSF1   | 1142 | 1216 | 3.73975210274  |
| NM_006924 | SRSF1   | 1813 | 1864 | 0.739752095195 |
| NM_006924 | SRSF1   | 4268 | 4339 | 1.7397520952   |
| NM_006924 | SRSF1   | 2686 | 2757 | 1.7397520952   |
| NM_006924 | SRSF1   | 414  | 488  | 0.739752102744 |
| NM_006924 | SRSF1   | 2351 | 2414 | 0.739578352426 |
| NM_006924 | SRSF1   | 645  | 862  | 4.90967710419  |
| NM_006924 | SRSF1   | 2578 | 2684 | 0.739752102744 |
| NM_006924 | SRSF1   | 1217 | 1431 | 4.73975210274  |
| NM_006924 | SRSF1   | 1038 | 1138 | 2.73975210274  |

|           |          |      |      |               |               |
|-----------|----------|------|------|---------------|---------------|
| NM_006924 | SRSF1    | 5047 | 5177 | 1.73975210274 |               |
| NM_006924 | SRSF1    | 2220 | 2291 | 3.54710702458 |               |
| NM_006924 | SRSF1    | 123  | 414  | 4.5471070248  |               |
| NM_020343 | RALGAPA2 |      | 4622 | 4694          | 5.97225049116 |
| NM_020343 | RALGAPA2 |      | 2105 | 2174          | 5.96823312691 |
| NM_020343 | RALGAPA2 |      | 1809 | 1861          | 5.97224399603 |
| NM_020343 | RALGAPA2 |      | 226  | 275           | 6.8881115177  |
| NM_020343 | RALGAPA2 |      | 5346 | 5406          | 6.96823312691 |
| NM_020343 | RALGAPA2 |      | 4963 | 5006          | 5.96823312691 |
| NM_020343 | RALGAPA2 |      | 8945 | 8993          | 5.97224399603 |
| NM_020343 | RALGAPA2 |      | 522  | 560           | 7.55703947749 |
| NM_020343 | RALGAPA2 |      | 3892 | 3947          | 7.55721299189 |
| NM_020343 | RALGAPA2 |      | 1712 | 1753          | 6.97207697676 |
| NM_020343 | RALGAPA2 |      | 1228 | 1276          | 5.96823312691 |
| NM_003204 | NFE2L1   | 3564 | 3617 | 3.54709282251 |               |
| NM_003204 | NFE2L1   | 1414 | 1454 | 3.54692580325 |               |
| NM_003204 | NFE2L1   | 2298 | 2368 | 4.54709955357 |               |
| NM_003204 | NFE2L1   | 2816 | 2904 | 3.54709955357 |               |
| NM_003204 | NFE2L1   | 2371 | 2448 | 5.13206205429 |               |
| NM_003204 | NFE2L1   | 2449 | 2500 | 5.54709955357 |               |
| NM_003204 | NFE2L1   | 4522 | 4596 | 4.54709955357 |               |
| NM_003204 | NFE2L1   | 4340 | 4404 | 4.54709955357 |               |
| NM_003204 | NFE2L1   | 949  | 998  | 5.13206204674 |               |
| NM_003204 | NFE2L1   | 621  | 767  | 7.35445447563 |               |
| NM_003204 | NFE2L1   | 3628 | 3710 | 4.54709282251 |               |
| NM_003204 | NFE2L1   | 2990 | 3128 | 6.13206205429 |               |
| NM_003204 | NFE2L1   | 4231 | 4338 | 6.54709955357 |               |
| NM_003204 | NFE2L1   | 4641 | 4746 | 6.13206205429 |               |
| NM_003204 | NFE2L1   | 533  | 612  | 5.86902764846 |               |
| NM_003204 | NFE2L1   | 3844 | 3971 | 6.13206205429 |               |
| NM_003204 | NFE2L1   | 3239 | 3326 | 4.54709955357 |               |
| NM_003204 | NFE2L1   | 4010 | 4223 | 7.13206205429 |               |
| NM_003204 | NFE2L1   | 3397 | 3488 | 5.54709955357 |               |
| NM_003204 | NFE2L1   | 68   | 243  | 6.54709955357 |               |
| NM_003204 | NFE2L1   | 244  | 479  | 7.93941697635 |               |
| NM_003204 | NFE2L1   | 1939 | 2295 | 9.19095574334 |               |
| NM_003204 | NFE2L1   | 1028 | 1376 | 7.79502706701 |               |
| NM_003204 | NFE2L1   | 2504 | 2768 | 7.71702455501 |               |
| NM_003204 | NFE2L1   | 1726 | 1796 | 5.54709954602 |               |
| NM_003204 | NFE2L1   | 772  | 912  | 5.54709955357 |               |
| NM_003204 | NFE2L1   | 1796 | 1924 | 6.71702455501 |               |
| NM_003204 | NFE2L1   | 1531 | 1703 | 7.13206205429 |               |
| NM_003205 | TCF12    | 4440 | 4470 | 4.86671579934 |               |
| NM_003205 | TCF12    | 4022 | 4072 | 7.27278310339 |               |
| NM_003205 | TCF12    | 979  | 1006 | 6.53564375912 |               |
| NM_003205 | TCF12    | 327  | 372  | 4.94683740855 |               |
| NM_003200 | TCF3     | 2436 | 2497 | 5.60972879087 |               |
| NM_003200 | TCF3     | 2059 | 2088 | 7.93165015471 |               |
| NM_003200 | TCF3     | 711  | 764  | 6.60972879087 |               |
| NM_003200 | TCF3     | 81   | 137  | 7.19469129159 |               |

|           |          |      |      |               |               |
|-----------|----------|------|------|---------------|---------------|
| NM_003200 | TCF3     | 4309 | 4374 | 7.60972879087 |               |
| NM_003200 | TCF3     | 1013 | 1135 | 7.19469129159 |               |
| NM_003200 | TCF3     | 1223 | 1276 | 5.60972878332 |               |
| NM_003200 | TCF3     | 4381 | 4444 | 5.60972855495 |               |
| NM_003200 | TCF3     | 2866 | 2929 | 8.41708371293 |               |
| NM_003200 | TCF3     | 880  | 962  | 6.60972205982 |               |
| NM_003200 | TCF3     | 1557 | 1654 | 5.60972879065 |               |
| NM_003200 | TCF3     | 1883 | 1962 | 6.60972878332 |               |
| NM_003200 | TCF3     | 613  | 689  | 5.60955504055 |               |
| NM_003200 | TCF3     | 3094 | 3141 | 5.6057111907  |               |
| NM_003200 | TCF3     | 2560 | 2763 | 9.51661938648 |               |
| NM_003200 | TCF3     | 2241 | 2353 | 6.60972879087 |               |
| NM_003200 | TCF3     | 3382 | 3530 | 5.60972879087 |               |
| NM_003200 | TCF3     | 255  | 387  | 7.93165688576 |               |
| NM_003200 | TCF3     | 3840 | 3970 | 6.60972879087 |               |
| NM_003201 | TFAM     | 1252 | 1315 | 3.54187093316 |               |
| NM_003201 | TFAM     | 938  | 995  | 2.54186443803 |               |
| NM_003201 | TFAM     | 1479 | 1556 | 4.12683366958 |               |
| NM_003201 | TFAM     | 1883 | 1932 | 3.54186443803 |               |
| NM_003201 | TFAM     | 1628 | 1707 | 3.54187116908 |               |
| NM_003201 | TFAM     | 458  | 503  | 2.54186443803 |               |
| NM_003201 | TFAM     | 4625 | 4686 | 3.53785356891 |               |
| NM_003201 | TFAM     | 1119 | 1211 | 4.86379926397 |               |
| NM_003201 | TFAM     | 404  | 457  | 2.45773195969 |               |
| NM_003201 | TFAM     | 1005 | 1105 | 4.86379926397 |               |
| NM_003201 | TFAM     | 527  | 683  | 5.1268336698  |               |
| NM_003201 | TFAM     | 1396 | 1476 | 4.1268336698  |               |
| NM_017952 | PTCD3    | 1378 | 1446 | 5.07092593872 |               |
| NM_017952 | PTCD3    | 342  | 419  | 5.65187083927 |               |
| NM_017952 | PTCD3    | 2661 | 2714 | 3.98678672934 |               |
| NM_017952 | PTCD3    | 1674 | 1730 | 4.07075218841 |               |
| NM_017952 | PTCD3    | 1186 | 1226 | 4.07091920767 |               |
| NM_017952 | PTCD3    | 1323 | 1372 | 5.06690833855 |               |
| NM_017952 | PTCD3    | 420  | 508  | 5.65588843923 |               |
| NM_017952 | PTCD3    | 171  | 261  | 5.65588843945 |               |
| NM_017952 | PTCD3    | 999  | 1092 | 5.65588843945 |               |
| NM_017952 | PTCD3    | 5411 | 5468 | 5.07092593873 |               |
| NM_017952 | PTCD3    | 1742 | 1866 | 6.07092593873 |               |
| NM_153256 | C10orf47 |      | 342  | 423           | 10.1672433352 |
| NM_153256 | C10orf47 |      | 1754 | 1837          | 8.16724333494 |
| NM_153256 | C10orf47 |      | 115  | 210           | 10.7522058359 |
| NM_153251 | ZDHHC20  | 5177 | 5235 | 6.66805118629 |               |
| NM_153251 | ZDHHC20  | 743  | 826  | 8.47942370852 |               |
| NM_153251 | ZDHHC20  | 1594 | 1670 | 5.67206855054 |               |
| NM_153251 | ZDHHC20  | 1769 | 1870 | 5.67206878645 |               |
| NM_153251 | ZDHHC20  | 428  | 503  | 7.99399688135 |               |
| NM_153251 | ZDHHC20  | 2329 | 2410 | 6.67206205541 |               |
| NM_153251 | ZDHHC20  | 353  | 392  | 7.25703105126 |               |
| NM_153251 | ZDHHC20  | 2813 | 2848 | 5.67189503614 |               |
| NM_153251 | ZDHHC20  | 1445 | 1494 | 7.25703105126 |               |

|              |         |      |      |               |
|--------------|---------|------|------|---------------|
| NM_153251    | ZDHC20  | 4554 | 4694 | 6.67206878646 |
| NM_153251    | ZDHC20  | 162  | 352  | 9.3725085046  |
| NM_153251    | ZDHC20  | 569  | 727  | 8.8419937879  |
| NM_153251    | ZDHC20  | 1175 | 1330 | 8.25703128718 |
| NM_153251    | ZDHC20  | 834  | 1030 | 8.67206878646 |
| NM_017958    | PLEKHB2 | 3914 | 3984 | 6.57694585063 |
| NM_017958    | PLEKHB2 | 2815 | 2869 | 6.57694585041 |
| NM_017958    | PLEKHB2 | 4165 | 4238 | 7.16190835136 |
| NM_017958    | PLEKHB2 | 2924 | 2968 | 4.57693911958 |
| NM_017958    | PLEKHB2 | 1502 | 1544 | 6.89887394552 |
| NM_017958    | PLEKHB2 | 2361 | 2413 | 4.57292825046 |
| NM_017958    | PLEKHB2 | 4061 | 4133 | 6.16190835136 |
| NM_017958    | PLEKHB2 | 3597 | 3632 | 4.49280664125 |
| NM_017958    | PLEKHB2 | 1077 | 1115 | 5.57693911958 |
| NM_017958    | PLEKHB2 | 1657 | 1701 | 5.57694584308 |
| NM_017958    | PLEKHB2 | 1570 | 1610 | 4.57694584308 |
| NM_017958    | PLEKHB2 | 2645 | 2744 | 6.16190835135 |
| NM_017958    | PLEKHB2 | 1213 | 1317 | 7.74687085208 |
| NM_017958    | PLEKHB2 | 1374 | 1493 | 7.16190835136 |
| NM_017958    | PLEKHB2 | 3837 | 3900 | 6.1619016203  |
| NM_017958    | PLEKHB2 | 2314 | 2361 | 6.16190835136 |
| NM_017958    | PLEKHB2 | 1001 | 1056 | 6.57292825046 |
| NM_017958    | PLEKHB2 | 3344 | 3489 | 7.38430077269 |
| NM_017958    | PLEKHB2 | 2421 | 2609 | 7.38430077269 |
| NM_017958    | PLEKHB2 | 4001 | 4034 | 5.49280664125 |
| NM_017958    | PLEKHB2 | 1855 | 1941 | 6.16190835136 |
| NM_017958    | PLEKHB2 | 551  | 938  | 9.22080204041 |
| NM_017958    | PLEKHB2 | 3104 | 3328 | 8.03637746927 |
| NM_145049    | UBLCP1  | 327  | 348  | 5.64120532155 |
| NM_145048    | PACRGL  | 396  | 482  | 8.88883255772 |
| NM_004274    | AKAP6   | 445  | 477  | 12.0262397087 |
| NM_004274    | AKAP6   | 550  | 599  | 11.1103721871 |
| NM_004274    | AKAP6   | 7311 | 7364 | 12.6951676685 |
| NM_004274    | AKAP6   | 5454 | 5506 | 12.106361318  |
| NM_004274    | AKAP6   | 7903 | 7975 | 11.106361318  |
| NM_004274    | AKAP6   | 1341 | 1397 | 12.106361318  |
| NM_004274    | AKAP6   | 2608 | 2667 | 12.1103786822 |
| NM_004274    | AKAP6   | 288  | 419  | 14.1103789181 |
| NM_004274    | AKAP6   | 695  | 909  | 13.432307013  |
| NM_001100588 | RC3H2   | 2212 | 2263 | 8.87440856107 |
| NM_001100588 | RC3H2   | 2647 | 2708 | 8.20548060128 |
| NM_001100588 | RC3H2   | 649  | 685  | 7.28560221049 |
| NM_001100588 | RC3H2   | 269  | 322  | 9.28560221049 |
| NM_004278    | PIGL    | 56   | 142  | 8.57918659409 |
| NM_004279    | PMPCB   | 1340 | 1383 | 3.92512263782 |
| NM_004279    | PMPCB   | 981  | 1048 | 3.92512263027 |
| NM_004279    | PMPCB   | 640  | 713  | 5.51008513854 |
| NM_004279    | PMPCB   | 829  | 898  | 4.51008513099 |
| NM_004279    | PMPCB   | 732  | 775  | 3.84098342844 |
| NM_004279    | PMPCB   | 1480 | 1586 | 4.51008513854 |



|              |          |      |      |                    |
|--------------|----------|------|------|--------------------|
| NM_004279    | PMPCB    | 107  | 215  | 4.51008513854      |
| NM_004279    | PMPCB    | 367  | 597  | 6.24705073271      |
| NM_004279    | PMPCB    | 1104 | 1246 | 6.38455425646      |
| NM_004279    | PMPCB    | 224  | 351  | 5.51008513854      |
| NM_001039717 | C4orf29  | 730  | 802  | 7.6807594299       |
| NM_001124756 | PABPC1L  | 1748 | 1854 | 4.82769155132      |
| NM_001124756 | PABPC1L  | 1961 | 2066 | 7.41265405204      |
| NM_001014283 | DCUN1D2  | 701  | 753  | 6.50239170128      |
| NM_001014283 | DCUN1D2  | 1005 | 1074 | 5.42227009206      |
| NM_001014283 | DCUN1D2  | 2425 | 2517 | 7.82833739634      |
| NM_001014283 | DCUN1D2  | 2065 | 2143 | 5.50640257039      |
| NM_001014283 | DCUN1D2  | 68   | 117  | 5.42227009206      |
| NM_001014283 | DCUN1D2  | 324  | 377  | 5.50239170128      |
| NM_001014283 | DCUN1D2  | 758  | 814  | 7.50640257039      |
| NM_001014283 | DCUN1D2  | 1280 | 1350 | 6.50640257039      |
| NM_001014283 | DCUN1D2  | 437  | 494  | 6.50239170128      |
| NM_001014283 | DCUN1D2  | 2145 | 2193 | 6.50239170128      |
| NM_001014283 | DCUN1D2  | 502  | 606  | 5.50640930145      |
| NM_001014283 | DCUN1D2  | 1494 | 1580 | 5.50640257039      |
| NM_001014283 | DCUN1D2  | 393  | 432  | 7.087354202        |
| NM_001014283 | DCUN1D2  | 2863 | 3010 | 7.09137180217      |
| NM_001014283 | DCUN1D2  | 1358 | 1432 | 5.50640257039      |
| NM_001135650 | EEF1E1   | 83   | 133  | 5.74531913555      |
| NM_022805    | SNRPN    | 686  | 739  | 6.2521612472       |
| NM_022805    | SNRPN    | 1005 | 1048 | 4.16802203781      |
| NM_022805    | SNRPN    | 768  | 813  | 5.75298453853      |
| NM_022805    | SNRPN    | 1493 | 1553 | 4.25216123965      |
| NM_198563    | TMEM110  | 599  | 639  | 9.79702424619      |
| NM_001199706 | KIAA0895 |      | 1701 | 1751 9.91686531509 |
| NM_001199706 | KIAA0895 |      | 3199 | 3257 9.00099779342 |
| NM_001161499 | ZNF611   | 2181 | 2224 | 9.60483685422      |
| NM_001128228 | TPRN     | 2083 | 2142 | 10.516766293       |
| NM_001128228 | TPRN     | 2506 | 2558 | 8.51274869279      |
| NM_001128228 | TPRN     | 2147 | 2219 | 8.51659254264      |
| NM_001042466 | PSAP     | 1869 | 2095 | 7.19753130596      |
| NM_001042466 | PSAP     | 2095 | 2197 | 4.70567820963      |
| NM_001042466 | PSAP     | 2199 | 2822 | 8.55116826057      |
| NM_001042466 | PSAP     | 885  | 1868 | 9.27553381796      |
| NM_001042466 | PSAP     | 53   | 880  | 8.77176740009      |
| NM_001128226 | DIS3     | 785  | 877  | 6.43343926954      |
| NM_001128226 | DIS3     | 1570 | 1651 | 6.43327225027      |
| NM_001128226 | DIS3     | 2430 | 2477 | 7.43327225027      |
| NM_001128225 | SLC39A13 |      | 1156 | 1203 9.0100078967  |
| NM_001128225 | SLC39A13 |      | 2346 | 2393 8.0100078967  |
| NM_001128225 | SLC39A13 |      | 503  | 553 9.09012950591  |
| NM_001128225 | SLC39A13 |      | 860  | 943 9.67910287575  |
| NM_001128225 | SLC39A13 |      | 620  | 701 9.67910287575  |
| NM_001128225 | SLC39A13 |      | 1259 | 1324 8.0100078967  |
| NM_016625    | RSRC1    | 1271 | 1330 | 4.95320460923      |
| NM_016625    | RSRC1    | 208  | 271  | 4.9531978784       |

|              |        |      |      |               |
|--------------|--------|------|------|---------------|
| NM_025164    | SIK3   | 527  | 615  | 6.61923712697 |
| NM_020401    | NUP107 | 1069 | 1146 | 4.68504520678 |
| NM_020401    | NUP107 | 542  | 611  | 6.68504519923 |
| NM_020401    | NUP107 | 1322 | 1372 | 5.6009059974  |
| NM_020401    | NUP107 | 1713 | 1842 | 7.2700077075  |
| NM_020401    | NUP107 | 882  | 940  | 5.68487145647 |
| NM_020401    | NUP107 | 1540 | 1646 | 4.68504520678 |
| NM_020401    | NUP107 | 2489 | 2572 | 4.68504519923 |
| NM_020401    | NUP107 | 1173 | 1313 | 6.68504520678 |
| NM_020401    | NUP107 | 2074 | 2186 | 5.68504520678 |
| NM_020401    | NUP107 | 2434 | 2480 | 5.6009059974  |
| NM_022575    | VPS16  | 2218 | 2324 | 8.53298892385 |
| NM_022575    | VPS16  | 374  | 424  | 7.94400882295 |
| NM_022575    | VPS16  | 1871 | 1938 | 8.94802642313 |
| NM_022575    | VPS16  | 734  | 821  | 8.53298892385 |
| NM_022575    | VPS16  | 2441 | 2513 | 9.53298892385 |
| NM_022575    | VPS16  | 559  | 667  | 9.53298892385 |
| NM_022575    | VPS16  | 103  | 177  | 8.94802642313 |
| NM_001204887 | RAB43  | 1602 | 1671 | 9.88987835593 |
| NM_001204887 | RAB43  | 2908 | 2966 | 8.71995335449 |
| NM_001204887 | RAB43  | 1835 | 1883 | 6.71995335427 |
| NM_001204887 | RAB43  | 3822 | 3866 | 6.71593575432 |
| NM_001204887 | RAB43  | 846  | 906  | 7.71593575432 |
| NM_001204887 | RAB43  | 1345 | 1388 | 6.71977960417 |
| NM_001204887 | RAB43  | 3299 | 3365 | 7.71995335448 |
| NM_001204887 | RAB43  | 4329 | 4398 | 6.71995335448 |
| NM_001204887 | RAB43  | 1719 | 1765 | 6.71995311857 |
| NM_001204887 | RAB43  | 461  | 561  | 8.30491585521 |
| NM_001204887 | RAB43  | 626  | 695  | 8.30491584766 |
| NM_001204887 | RAB43  | 995  | 1055 | 6.71593575432 |
| NM_001204887 | RAB43  | 3600 | 3705 | 7.71995335449 |
| NM_020409    | MRPL47 | 252  | 327  | 2.91709872028 |
| NM_020409    | MRPL47 | 62   | 113  | 3.91709871273 |
| NM_020409    | MRPL47 | 403  | 473  | 3.91709848436 |
| NM_020409    | MRPL47 | 631  | 673  | 2.91308112011 |
| NM_020409    | MRPL47 | 500  | 562  | 5.23902681517 |
| NM_015641    | TES    | 1428 | 1491 | 7.97925903556 |
| NM_015641    | TES    | 854  | 932  | 6.39429654239 |
| NM_015641    | TES    | 413  | 485  | 7.97925903556 |
| NM_015641    | TES    | 766  | 843  | 7.39428981133 |
| NM_015641    | TES    | 1170 | 1253 | 7.97925904311 |
| NM_015641    | TES    | 1003 | 1145 | 9.85372816103 |
| NM_015641    | TES    | 494  | 566  | 7.97925904289 |
| NM_015641    | TES    | 202  | 410  | 8.71622463728 |
| NM_016530    | RAB8B  | 2904 | 2966 | 5.59831316755 |
| NM_016531    | KLF3   | 1283 | 1340 | 5.95875721994 |
| NM_016531    | KLF3   | 3252 | 3335 | 4.95875721994 |
| NM_016531    | KLF3   | 1395 | 1440 | 4.95875721994 |
| NM_016531    | KLF3   | 533  | 599  | 5.95491337009 |
| NM_016531    | KLF3   | 488  | 522  | 4.87479176088 |

|              |              |      |      |               |               |
|--------------|--------------|------|------|---------------|---------------|
| NM_016531    | KLF3         | 1562 | 1618 | 4.95893097004 |               |
| NM_016531    | KLF3         | 4522 | 4601 | 4.87479176088 |               |
| NM_016532    | INPP5K       | 501  | 568  | 9.6836923006  |               |
| NM_016532    | INPP5K       | 1014 | 1060 | 8.68753615046 |               |
| NM_016532    | INPP5K       | 928  | 999  | 9.6836923006  |               |
| NM_016532    | INPP5K       | 1989 | 2058 | 8.60357069139 |               |
| NM_006442    | DRAP1        | 880  | 953  | 4.33629907478 |               |
| NM_006442    | DRAP1        | 826  | 879  | 4.33630580561 |               |
| NM_006442    | DRAP1        | 460  | 519  | 5.83712909717 |               |
| NM_016538    | SIRT7        | 1467 | 1544 | 7.79266449761 |               |
| NM_016538    | SIRT7        | 584  | 661  | 7.79266449782 |               |
| NM_016538    | SIRT7        | 1235 | 1319 | 8.29348778916 |               |
| NM_016538    | SIRT7        | 1412 | 1456 | 6.79249074751 |               |
| NM_016538    | SIRT7        | 923  | 1015 | 6.79266449783 |               |
| NM_016539    | SIRT6        | 154  | 216  | 9.45548927074 |               |
| NM_016539    | SIRT6        | 430  | 475  | 8.45933312059 |               |
| NM_016539    | SIRT6        | 1149 | 1248 | 11.0444693716 |               |
| NM_015885    | PCF11        | 3230 | 3249 | 6.00694512218 |               |
| NM_015885    | PCF11        | 2505 | 2533 | 6.59191435373 |               |
| NM_015885    | PCF11        | 4410 | 4515 | 5.00694512218 |               |
| NM_015884    | MBTPS2       | 3175 | 3251 | 7.14713470057 |               |
| NM_015884    | MBTPS2       | 1484 | 1565 | 8.81623641067 |               |
| NM_015884    | MBTPS2       | 1752 | 1808 | 9.55320200484 |               |
| NM_015884    | MBTPS2       | 471  | 532  | 10.038628832  |               |
| NM_015884    | MBTPS2       | 1565 | 1628 | 9.23127390996 |               |
| NM_015884    | MBTPS2       | 964  | 1004 | 8.81606266036 |               |
| NM_015884    | MBTPS2       | 1166 | 1214 | 9.23127390995 |               |
| NM_015884    | MBTPS2       | 197  | 362  | 10.6907055286 |               |
| NM_015884    | MBTPS2       | 671  | 838  | 10.4011989114 |               |
| NM_015884    | MBTPS2       | 1299 | 1465 | 9.81623641068 |               |
| NM_015884    | MBTPS2       | 1044 | 1124 | 8.14713470057 |               |
| NM_015884    | MBTPS2       | 2159 | 2222 | 8.14713470057 |               |
| NM_175866    | UHMK1        | 1167 | 1275 | 7.24216021026 |               |
| NM_175866    | UHMK1        | 8096 | 8174 | 7.65719770954 |               |
| NM_175866    | UHMK1        | 4873 | 4944 | 6.57305850016 |               |
| NM_175866    | UHMK1        | 5105 | 5145 | 7.24198645994 |               |
| NM_175866    | UHMK1        | 6504 | 6561 | 6.65702395922 |               |
| NM_175866    | UHMK1        | 8252 | 8302 | 5.65318010937 |               |
| NM_175866    | UHMK1        | 2163 | 2194 | 5.57305850016 |               |
| NM_175866    | UHMK1        | 501  | 553  | 7.24216021026 |               |
| NM_175866    | UHMK1        | 752  | 804  | 6.65318010937 |               |
| NM_175866    | UHMK1        | 1499 | 1537 | 6.57305850016 |               |
| NM_175866    | UHMK1        | 923  | 960  | 5.57305850016 |               |
| NM_175866    | UHMK1        | 5710 | 5790 | 6.65719770199 |               |
| NM_175866    | UHMK1        | 2398 | 2484 | 7.24198645994 |               |
| NM_175866    | UHMK1        | 3793 | 3881 | 5.65719770954 |               |
| NM_001198879 | ATP5J2-PTCD1 |      | 645  | 712           | 7.53522362481 |
| NM_001198879 | ATP5J2-PTCD1 |      | 59   | 178           | 10.3425852779 |
| NM_015888    | H00K1        | 1481 | 1545 | 4.7160779099  |               |
| NM_015888    | H00K1        | 1173 | 1247 | 5.80021038823 |               |

|              |         |      |      |               |
|--------------|---------|------|------|---------------|
| NM_015888    | H00K1   | 3545 | 3572 | 3.7160779099  |
| NM_015888    | H00K1   | 825  | 887  | 3.80004336897 |
| NM_015888    | H00K1   | 3000 | 3048 | 4.7160779099  |
| NM_015888    | H00K1   | 1073 | 1114 | 3.80004336897 |
| NM_015888    | H00K1   | 2211 | 2286 | 3.79619951911 |
| NM_015888    | H00K1   | 4439 | 4512 | 5.80021711928 |
| NM_015888    | H00K1   | 635  | 768  | 4.80021711929 |
| NM_015888    | H00K1   | 1776 | 1872 | 4.80021711928 |
| NM_002157    | HSPE1   | 760  | 836  | 5.7824261682  |
| NM_002157    | HSPE1   | 708  | 757  | 4.7824261682  |
| NM_002157    | HSPE1   | 552  | 708  | 5.63042307475 |
| NM_002157    | HSPE1   | 353  | 543  | 6.36738866892 |
| NM_001098577 | RPL31   | 62   | 418  | 4.45672169507 |
| NM_002154    | HSPA4   | 779  | 828  | 3.68885763746 |
| NM_002154    | HSPA4   | 105  | 172  | 5.01078573236 |
| NM_002154    | HSPA4   | 2670 | 2743 | 4.27381990227 |
| NM_002154    | HSPA4   | 2341 | 2397 | 3.68885090641 |
| NM_002154    | HSPA4   | 2574 | 2637 | 3.68885763746 |
| NM_002154    | HSPA4   | 3272 | 3327 | 3.60471842808 |
| NM_002154    | HSPA4   | 464  | 558  | 5.49621255953 |
| NM_002154    | HSPA4   | 1106 | 1251 | 6.68885763747 |
| NM_002154    | HSPA4   | 1775 | 1853 | 2.68885763747 |
| NM_002154    | HSPA4   | 2745 | 2817 | 4.68885763746 |
| NM_002154    | HSPA4   | 1901 | 2027 | 5.01078573236 |
| NM_002154    | HSPA4   | 2427 | 2525 | 5.49621255953 |
| NM_002154    | HSPA4   | 1277 | 1569 | 6.68885763747 |
| NM_002154    | HSPA4   | 267  | 420  | 5.68885763747 |
| NM_002154    | HSPA4   | 564  | 770  | 6.77632047872 |
| NM_002154    | HSPA4   | 2035 | 2327 | 6.38929735561 |
| NM_002154    | HSPA4   | 857  | 1103 | 6.85878263891 |
| NM_002154    | HSPA4   | 1578 | 1744 | 3.68885763747 |
| NM_002153    | HSD17B2 | 111  | 147  | 5.50725623668 |
| NM_002153    | HSD17B2 | 1277 | 1314 | 4.92228700491 |
| NM_002153    | HSD17B2 | 622  | 792  | 8.50725623668 |
| NM_002153    | HSD17B2 | 969  | 1263 | 8.6227334541  |
| NM_002153    | HSD17B2 | 803  | 935  | 7.0922187374  |
| NM_002153    | HSD17B2 | 325  | 592  | 8.00975657721 |
| NM_002153    | HSD17B2 | 30   | 88   | 5.50323863651 |
| NM_002153    | HSD17B2 | 158  | 315  | 7.72964865802 |
| NM_001010942 | RAP1B   | 376  | 466  | 4.06629147309 |
| NM_001010942 | RAP1B   | 883  | 937  | 2.48132873667 |
| NM_001010942 | RAP1B   | 1069 | 1116 | 3.39718976321 |
| NM_001010942 | RAP1B   | 1598 | 1645 | 2.47731137242 |
| NM_001010942 | RAP1B   | 1492 | 1546 | 2.48115522227 |
| NM_001010942 | RAP1B   | 1395 | 1464 | 4.06629146576 |
| NM_001010942 | RAP1B   | 1712 | 1791 | 3.48132897259 |
| NM_001010942 | RAP1B   | 181  | 354  | 6.06629147331 |
| NM_001010942 | RAP1B   | 625  | 683  | 4.48132897259 |
| NM_001010942 | RAP1B   | 767  | 849  | 5.28868389465 |
| NM_001010942 | RAP1B   | 496  | 621  | 5.06629147331 |

|              |         |      |      |               |
|--------------|---------|------|------|---------------|
| NM_001199878 | SERF2   | 620  | 654  | 2.80202943    |
| NM_001199878 | SERF2   | 236  | 306  | 2.80202943    |
| NM_001199878 | SERF2   | 1176 | 1225 | 1.79801182983 |
| NM_001199878 | SERF2   | 308  | 546  | 5.50246914815 |
| NM_013337    | TIMM22  | 729  | 785  | 8.58998023791 |
| NM_013336    | SEC61A1 | 3537 | 3617 | 8.25248067425 |
| NM_013336    | SEC61A1 | 3353 | 3385 | 5.07853807263 |
| NM_013336    | SEC61A1 | 3443 | 3501 | 5.08255543689 |
| NM_013336    | SEC61A1 | 3217 | 3326 | 8.08255567281 |
| NM_013336    | SEC61A1 | 1769 | 2352 | 11.7968011905 |
| NM_013336    | SEC61A1 | 3038 | 3202 | 7.08255567281 |
| NM_013336    | SEC61A1 | 45   | 173  | 8.08255567281 |
| NM_013336    | SEC61A1 | 2371 | 3024 | 11.2723802317 |
| NM_013336    | SEC61A1 | 179  | 1185 | 12.5982555111 |
| NM_013336    | SEC61A1 | 1187 | 1768 | 11.682468515  |
| NM_001199873 | B4GALT3 | 557  | 605  | 9.02841063032 |
| NM_001199873 | B4GALT3 | 2052 | 2089 | 7.70647580438 |
| NM_001199873 | B4GALT3 | 2217 | 2269 | 8.29144502861 |
| NM_001199873 | B4GALT3 | 1284 | 1366 | 9.0284106301  |
| NM_001199873 | B4GALT3 | 2093 | 2197 | 8.29144503616 |
| NM_001199873 | B4GALT3 | 1645 | 1770 | 7.70648253543 |
| NM_002158    | FOXN2   | 712  | 752  | 5.85420225976 |
| NM_182919    | TICAM1  | 1775 | 1820 | 9.69919904714 |
| NM_182919    | TICAM1  | 1617 | 1673 | 11.7032166471 |
| NM_182919    | TICAM1  | 326  | 375  | 9.70320991626 |
| NM_182919    | TICAM1  | 798  | 853  | 10.7032166398 |
| NM_182919    | TICAM1  | 131  | 203  | 9.70321663976 |
| NM_001089591 | UQCRHL  | 8    | 67   | 3.1284099739  |
| NM_001089591 | UQCRHL  | 299  | 363  | 2.04828836469 |
| NM_001089591 | UQCRHL  | 227  | 275  | 3.71721632448 |
| NM_139283    | PPTC7   | 500  | 554  | 8.80335186616 |
| NM_001012614 | CTBP1   | 862  | 936  | 7.17054383122 |
| NM_001012614 | CTBP1   | 546  | 591  | 6.1703700809  |
| NM_001012614 | CTBP1   | 1209 | 1305 | 7.97789875327 |
| NM_001012614 | CTBP1   | 2400 | 2458 | 7.75550633194 |
| NM_001012614 | CTBP1   | 133  | 189  | 5.16652623104 |
| NM_001012614 | CTBP1   | 2043 | 2132 | 7.4924719261  |
| NM_001012614 | CTBP1   | 940  | 1104 | 8.97789875327 |
| NM_001012614 | CTBP1   | 621  | 814  | 8.75550633194 |
| NM_001012614 | CTBP1   | 1384 | 1487 | 7.17054383122 |
| NM_001012614 | CTBP1   | 1717 | 2031 | 9.56286125399 |
| NM_001012614 | CTBP1   | 197  | 541  | 10.0774344268 |
| NM_001012614 | CTBP1   | 2136 | 2257 | 7.4924719261  |
| NM_001130688 | HMGB2   | 426  | 540  | 3.88050516487 |
| NM_001130688 | HMGB2   | 1024 | 1124 | 4.10289758621 |
| NM_001130688 | HMGB2   | 774  | 997  | 3.88050516487 |
| NM_001130688 | HMGB2   | 220  | 343  | 2.29554266415 |
| NM_001123168 | FAM72A  | 402  | 458  | 8.51868258987 |
| NM_001123168 | FAM72A  | 551  | 638  | 8.51885634019 |
| NM_002841    | PTPRG   | 2136 | 2182 | 7.46138983285 |

|           |       |       |       |               |
|-----------|-------|-------|-------|---------------|
| NM_002841 | PTPRG | 3398  | 3432  | 6.38126822364 |
| NM_002841 | PTPRG | 2978  | 3019  | 8.78733552036 |
| NM_002841 | PTPRG | 5217  | 5258  | 6.38126822364 |
| NM_002841 | PTPRG | 5080  | 5127  | 7.46138983285 |
| NM_002841 | PTPRG | 1826  | 1905  | 6.46138983285 |
| NM_002841 | PTPRG | 81    | 174   | 6.46540070197 |
| NM_002841 | PTPRG | 3510  | 3629  | 8.05036320269 |
| NM_002332 | LRP1  | 8921  | 9036  | 5.31490471537 |
| NM_002332 | LRP1  | 3762  | 3895  | 6.53729713671 |
| NM_002332 | LRP1  | 10990 | 11045 | 4.72592461448 |
| NM_002332 | LRP1  | 4931  | 4957  | 3.72592461448 |
| NM_002332 | LRP1  | 805   | 845   | 3.72592461448 |
| NM_002332 | LRP1  | 13708 | 13755 | 4.72976846433 |
| NM_002332 | LRP1  | 576   | 670   | 5.31490471537 |
| NM_002332 | LRP1  | 3291  | 3381  | 5.72994221465 |
| NM_002332 | LRP1  | 1308  | 1387  | 5.3108871152  |
| NM_002332 | LRP1  | 9496  | 9567  | 3.72994197873 |
| NM_002332 | LRP1  | 1389  | 1459  | 5.72994221465 |
| NM_002332 | LRP1  | 9397  | 9442  | 3.7299422071  |
| NM_002332 | LRP1  | 5415  | 5521  | 5.31490471537 |
| NM_002332 | LRP1  | 12742 | 12786 | 5.31490471537 |
| NM_002332 | LRP1  | 2603  | 2677  | 3.72994221465 |
| NM_002332 | LRP1  | 3080  | 3123  | 5.31473096506 |
| NM_002332 | LRP1  | 688   | 721   | 4.7299354836  |
| NM_002332 | LRP1  | 6637  | 6714  | 5.31490471537 |
| NM_002332 | LRP1  | 7231  | 7295  | 4.72994221465 |
| NM_002332 | LRP1  | 10518 | 10575 | 3.7299422071  |
| NM_002332 | LRP1  | 6024  | 6079  | 4.7299354836  |
| NM_002332 | LRP1  | 13885 | 13973 | 3.72976846433 |
| NM_002332 | LRP1  | 9291  | 9351  | 4.72976846433 |
| NM_002332 | LRP1  | 8595  | 8665  | 4.72994221465 |
| NM_002332 | LRP1  | 12170 | 12219 | 4.72976846433 |
| NM_002332 | LRP1  | 11113 | 11177 | 4.7299422071  |
| NM_002332 | LRP1  | 2678  | 2758  | 5.31490471537 |
| NM_002332 | LRP1  | 13009 | 13089 | 4.72994221465 |
| NM_002332 | LRP1  | 2288  | 2334  | 5.31490471537 |
| NM_002332 | LRP1  | 5594  | 5634  | 4.7299354836  |
| NM_002332 | LRP1  | 6559  | 6617  | 3.72994221443 |
| NM_002332 | LRP1  | 8334  | 8396  | 5.31490471537 |
| NM_002332 | LRP1  | 8201  | 8281  | 5.72994221465 |
| NM_002332 | LRP1  | 9926  | 9958  | 3.72592461448 |
| NM_002332 | LRP1  | 1489  | 1572  | 5.72994221465 |
| NM_002332 | LRP1  | 10116 | 10215 | 5.72994221465 |
| NM_002332 | LRP1  | 12310 | 12427 | 6.05187030954 |
| NM_002332 | LRP1  | 8833  | 8884  | 5.72994221443 |
| NM_002332 | LRP1  | 4414  | 4498  | 3.72994221443 |
| NM_002332 | LRP1  | 4781  | 4830  | 4.72976846433 |
| NM_002332 | LRP1  | 7858  | 7911  | 4.72592461448 |
| NM_002332 | LRP1  | 3432  | 3622  | 5.31490471537 |
| NM_002332 | LRP1  | 2416  | 2513  | 5.31490471537 |

|           |        |       |       |               |
|-----------|--------|-------|-------|---------------|
| NM_002332 | LRP1   | 3133  | 3245  | 4.72994221465 |
| NM_002332 | LRP1   | 7636  | 7695  | 3.64580300527 |
| NM_002332 | LRP1   | 11749 | 11796 | 4.72592461448 |
| NM_002332 | LRP1   | 9568  | 9706  | 5.72994221465 |
| NM_002332 | LRP1   | 7090  | 7209  | 4.72994221465 |
| NM_002332 | LRP1   | 2833  | 2881  | 3.64580300527 |
| NM_002332 | LRP1   | 3931  | 4099  | 5.31490471537 |
| NM_002332 | LRP1   | 2129  | 2250  | 4.72994221465 |
| NM_002332 | LRP1   | 6761  | 6861  | 5.31490471537 |
| NM_002332 | LRP1   | 1678  | 1809  | 6.53729713671 |
| NM_002332 | LRP1   | 10737 | 10817 | 3.72976846433 |
| NM_002332 | LRP1   | 8682  | 8770  | 3.72994221465 |
| NM_002332 | LRP1   | 5851  | 5932  | 4.64580300527 |
| NM_002843 | PTPRJ  | 4093  | 4178  | 10.6336555256 |
| NM_002843 | PTPRJ  | 4865  | 4935  | 9.04852600566 |
| NM_002843 | PTPRJ  | 2020  | 2069  | 9.96456054659 |
| NM_002843 | PTPRJ  | 7330  | 7406  | 10.0486930249 |
| NM_002843 | PTPRJ  | 3760  | 3837  | 9.04869974843 |
| NM_002843 | PTPRJ  | 1432  | 1483  | 9.0446821558  |
| NM_002843 | PTPRJ  | 1090  | 1125  | 9.0446821558  |
| NM_002843 | PTPRJ  | 2988  | 3089  | 11.6336622567 |
| NM_002843 | PTPRJ  | 2357  | 2404  | 9.0446821558  |
| NM_002843 | PTPRJ  | 1867  | 1913  | 11.0446821558 |
| NM_002843 | PTPRJ  | 5357  | 5421  | 9.0446821558  |
| NM_002843 | PTPRJ  | 5496  | 5568  | 9.04869302492 |
| NM_002842 | PTPRH  | 2910  | 2967  | 6.85893535696 |
| NM_002337 | LRPAP1 | 1415  | 1490  | 4.68825622495 |
| NM_002337 | LRPAP1 | 3329  | 3386  | 1.87688370272 |
| NM_002337 | LRPAP1 | 3082  | 3130  | 1.87688370272 |
| NM_002337 | LRPAP1 | 174   | 216   | 1.88089457184 |
| NM_002337 | LRPAP1 | 102   | 170   | 3.88090130289 |
| NM_002337 | LRPAP1 | 3684  | 3728  | 1.88089457184 |
| NM_002337 | LRPAP1 | 1065  | 1193  | 4.68825622495 |
| NM_002337 | LRPAP1 | 629   | 771   | 5.05082630433 |
| NM_002337 | LRPAP1 | 4701  | 4732  | 1.87688370272 |
| NM_002337 | LRPAP1 | 1193  | 1394  | 6.12882881634 |
| NM_002337 | LRPAP1 | 4463  | 4514  | 1.88072755257 |
| NM_002337 | LRPAP1 | 964   | 1024  | 1.87688370272 |
| NM_002337 | LRPAP1 | 4002  | 4103  | 3.46586379606 |
| NM_002337 | LRPAP1 | 224   | 629   | 7.01018431984 |
| NM_002337 | LRPAP1 | 774   | 942   | 4.88090130289 |
| NM_002337 | LRPAP1 | 4261  | 4351  | 1.88090130289 |
| NM_002844 | PTPRK  | 2765  | 2828  | 6.14787817196 |
| NM_002844 | PTPRK  | 4785  | 4845  | 5.88082616596 |
| NM_002844 | PTPRK  | 5747  | 5798  | 4.55889807107 |
| NM_002844 | PTPRK  | 2687  | 2759  | 6.73284067268 |
| NM_002844 | PTPRK  | 5087  | 5124  | 4.56291566369 |
| NM_002844 | PTPRK  | 851   | 949   | 6.73284067268 |
| NM_002844 | PTPRK  | 2304  | 2432  | 6.14787817196 |
| NM_002844 | PTPRK  | 3436  | 3471  | 3.47877646186 |

|           |       |      |      |               |
|-----------|-------|------|------|---------------|
| NM_002844 | PTPRK | 1427 | 1579 | 7.14787817196 |
| NM_002844 | PTPRK | 4515 | 4570 | 3.56290894019 |
| NM_002844 | PTPRK | 4881 | 4927 | 3.47877646186 |
| NM_002844 | PTPRK | 3725 | 3969 | 8.0864776273  |
| NM_002844 | PTPRK | 990  | 1156 | 7.02234728988 |
| NM_002844 | PTPRK | 1580 | 1724 | 7.14787817196 |
| NM_002844 | PTPRK | 2503 | 2609 | 5.14787817196 |
| NM_002844 | PTPRK | 3538 | 3724 | 7.56291567124 |
| NM_002844 | PTPRK | 4413 | 4514 | 3.56291567124 |
| NM_002844 | PTPRK | 3191 | 3424 | 7.56291567124 |
| NM_002844 | PTPRK | 1905 | 2009 | 6.56291567124 |
| NM_002844 | PTPRK | 4588 | 4754 | 7.14787817196 |
| NM_002844 | PTPRK | 1761 | 1885 | 7.14787817196 |
| NM_002844 | PTPRK | 279  | 631  | 8.69219868819 |
| NM_002844 | PTPRK | 2969 | 3122 | 6.56291567124 |
| NM_002844 | PTPRK | 644  | 848  | 8.3178031734  |
| NM_002844 | PTPRK | 1169 | 1422 | 7.81084318468 |
| NM_002844 | PTPRK | 4032 | 4365 | 8.46980626685 |
| NM_002844 | PTPRK | 2068 | 2236 | 6.3702705933  |
| NM_002335 | LRP5  | 4144 | 4227 | 6.24573895933 |
| NM_002335 | LRP5  | 991  | 1050 | 5.07581395789 |
| NM_002335 | LRP5  | 2874 | 2935 | 3.07581395789 |
| NM_002335 | LRP5  | 3456 | 3560 | 5.39774205278 |
| NM_002335 | LRP5  | 1968 | 2052 | 6.07581395789 |
| NM_002335 | LRP5  | 4571 | 4712 | 5.88316887995 |
| NM_002335 | LRP5  | 4233 | 4315 | 5.39774205278 |
| NM_002335 | LRP5  | 911  | 966  | 4.07581395789 |
| NM_002335 | LRP5  | 3707 | 3742 | 2.99167474851 |
| NM_002335 | LRP5  | 758  | 790  | 2.99167474851 |
| NM_002335 | LRP5  | 4927 | 5122 | 6.66077645861 |
| NM_002335 | LRP5  | 4457 | 4520 | 3.07581395034 |
| NM_002335 | LRP5  | 4738 | 4844 | 4.66077645861 |
| NM_002335 | LRP5  | 206  | 756  | 8.77625367603 |
| NM_002335 | LRP5  | 3283 | 3431 | 4.66077645861 |
| NM_002335 | LRP5  | 2062 | 2858 | 8.88316887995 |
| NM_002335 | LRP5  | 2947 | 3241 | 7.32374147134 |
| NM_002335 | LRP5  | 790  | 901  | 5.66077645861 |
| NM_002335 | LRP5  | 1072 | 1967 | 8.88316887995 |
| NM_002335 | LRP5  | 3562 | 3704 | 5.66077645861 |
| NM_002335 | LRP5  | 3809 | 4134 | 6.9827045535  |
| NM_183381 | RNF13 | 1529 | 1580 | 4.966939512   |
| NM_183381 | RNF13 | 1039 | 1079 | 6.55190201272 |
| NM_183381 | RNF13 | 2004 | 2042 | 7.28904135721 |
| NM_183381 | RNF13 | 572  | 640  | 5.96309566215 |
| NM_183381 | RNF13 | 1585 | 1646 | 5.966939512   |
| NM_183381 | RNF13 | 878  | 923  | 4.9671130264  |
| NM_183381 | RNF13 | 815  | 839  | 4.88297405294 |
| NM_183381 | RNF13 | 2425 | 2479 | 5.96711326232 |
| NM_183381 | RNF13 | 1475 | 1512 | 4.96309566215 |
| NM_183381 | RNF13 | 703  | 782  | 6.96711326232 |



|              |           |      |      |               |               |
|--------------|-----------|------|------|---------------|---------------|
| NM_183381    | RNF13     | 1280 | 1369 | 5.96711326232 |               |
| NM_183381    | RNF13     | 1370 | 1438 | 7.55207576282 |               |
| NM_183381    | RNF13     | 1654 | 1753 | 6.55207576304 |               |
| NM_183381    | RNF13     | 1815 | 1993 | 8.42654488096 |               |
| NM_001126102 | HP        | 973  | 1028 | 2.08529266879 |               |
| NM_001126104 | RACGAP1   | 1120 | 1224 | 8.13288541012 |               |
| NM_001126104 | RACGAP1   | 1040 | 1119 | 7.81095731523 |               |
| NM_001126104 | RACGAP1   | 1794 | 1854 | 7.81095730768 |               |
| NM_001126104 | RACGAP1   | 1004 | 1032 | 6.81078356492 |               |
| NM_001126104 | RACGAP1   | 2093 | 2189 | 7.81095731523 |               |
| NM_001126104 | RACGAP1   | 670  | 738  | 8.13288541012 |               |
| NM_001126104 | RACGAP1   | 3071 | 3134 | 5.81095058418 |               |
| NM_001126104 | RACGAP1   | 210  | 270  | 8.1328854099  |               |
| NM_001126104 | RACGAP1   | 798  | 890  | 7.81095731523 |               |
| NM_001126104 | RACGAP1   | 1906 | 2005 | 8.13288541012 |               |
| NM_001126104 | RACGAP1   | 1406 | 1514 | 8.81095731523 |               |
| NM_001126104 | RACGAP1   | 890  | 981  | 8.13288541012 |               |
| NM_001126104 | RACGAP1   | 2335 | 2414 | 5.80693971506 |               |
| NM_001126104 | RACGAP1   | 127  | 204  | 7.81078356492 |               |
| NM_001126104 | RACGAP1   | 2675 | 2780 | 7.39591981573 |               |
| NM_001126104 | RACGAP1   | 1296 | 1406 | 8.61831223729 |               |
| NM_001126104 | RACGAP1   | 275  | 561  | 9.71784791084 |               |
| NM_001126104 | RACGAP1   | 2933 | 3040 | 7.39591958004 |               |
| NM_024565    | CCNJL     | 363  | 417  | 11.8636654531 |               |
| NM_024560    | ACSS3     | 1768 | 1821 | 3.40630848335 |               |
| NM_024560    | ACSS3     | 1829 | 1903 | 4.99528834833 |               |
| NM_024560    | ACSS3     | 1934 | 2004 | 3.41032607598 |               |
| NM_024560    | ACSS3     | 335  | 388  | 3.41015233321 |               |
| NM_024560    | ACSS3     | 1009 | 1047 | 4.40630848335 |               |
| NM_024560    | ACSS3     | 1506 | 1555 | 4.40630848335 |               |
| NM_024560    | ACSS3     | 1665 | 1762 | 5.99528858424 |               |
| NM_024560    | ACSS3     | 1601 | 1648 | 4.99127098407 |               |
| NM_024560    | ACSS3     | 1269 | 1410 | 5.99528858425 |               |
| NM_024560    | ACSS3     | 1427 | 1502 | 5.41032608352 |               |
| NM_024560    | ACSS3     | 934  | 996  | 4.41032584761 |               |
| NM_024560    | ACSS3     | 1067 | 1214 | 6.41032608352 |               |
| NM_024560    | ACSS3     | 679  | 860  | 4.41032608352 |               |
| XM_001132754 | LOC728734 |      | 624  | 677           | 8.19761475875 |
| XM_001132754 | LOC728734 |      | 518  | 575           | 9.19761475875 |
| XM_001132754 | LOC728734 |      | 266  | 378           | 10.1976147588 |
| NM_144600    | FOPNL     | 809  | 881  | 6.1758112192  |               |
| NM_144600    | FOPNL     | 65   | 112  | 6.76461756978 |               |
| NM_005318    | H1F0      | 1011 | 1076 | 3.60509362544 |               |
| NM_005318    | H1F0      | 2140 | 2204 | 2.02013112471 |               |
| NM_005318    | H1F0      | 508  | 570  | 2.02013136063 |               |
| NM_005318    | H1F0      | 1809 | 1894 | 4.34205945551 |               |
| NM_005318    | H1F0      | 1082 | 1211 | 4.34205945552 |               |
| NM_015523    | REX02     | 267  | 370  | 6.67749358669 |               |
| NM_194456    | KRIT1     | 2887 | 2944 | 6.35245155146 |               |
| NM_001014449 | DDX19B    | 857  | 902  | 4.05571977462 |               |

|              |         |      |      |               |
|--------------|---------|------|------|---------------|
| NM_001014449 | DDX19B  | 1062 | 1101 | 3.97175431555 |
| NM_001014449 | DDX19B  | 677  | 786  | 4.64085602565 |
| NM_001144978 | MTHFD2L | 328  | 423  | 9.87919804975 |
| NM_213720    | CHCHD10 | 481  | 506  | 8.43600181036 |
| NM_014598    | S0CS7   | 865  | 954  | 9.03270583498 |
| NM_147190    | CERS5   | 551  | 597  | 8.04866174123 |
| NM_147190    | CERS5   | 698  | 760  | 9.71776345133 |
| NM_147190    | CERS5   | 1368 | 1488 | 8.13280094306 |
| NM_147190    | CERS5   | 1595 | 1663 | 9.13280071469 |
| NM_147190    | CERS5   | 1498 | 1573 | 9.13280095061 |
| NM_147190    | CERS5   | 1796 | 1837 | 8.13279421956 |
| NM_147190    | CERS5   | 1048 | 1157 | 9.71776345133 |
| NM_147190    | CERS5   | 1259 | 1322 | 8.13280094306 |
| NM_147190    | CERS5   | 402  | 486  | 8.71776345133 |
| NM_147190    | CERS5   | 853  | 974  | 9.4547290455  |
| NM_147190    | CERS5   | 265  | 338  | 7.13280071469 |
| NM_014593    | CXXC1   | 1236 | 1315 | 7.24152725039 |
| NM_014593    | CXXC1   | 2429 | 2474 | 5.65254715705 |
| NM_018141    | MRPS10  | 102  | 147  | 5.39887871913 |
| NM_018141    | MRPS10  | 286  | 399  | 8.39887895505 |
| NM_004168    | SDHA    | 1887 | 1943 | 4.46897199448 |
| NM_004168    | SDHA    | 2281 | 2363 | 3.88400948621 |
| NM_004168    | SDHA    | 947  | 1008 | 5.20593758865 |
| NM_004168    | SDHA    | 1257 | 1332 | 5.20593758865 |
| NM_004168    | SDHA    | 1682 | 1846 | 6.46897199448 |
| NM_004168    | SDHA    | 1009 | 1242 | 7.3434411124  |
| NM_004168    | SDHA    | 182  | 368  | 6.69136441582 |
| NM_004168    | SDHA    | 377  | 912  | 8.5844492119  |
| NM_004168    | SDHA    | 1989 | 2272 | 7.40757144982 |
| NM_004168    | SDHA    | 1447 | 1671 | 7.46897199448 |
| NM_004168    | SDHA    | 96   | 176  | 3.87999189359 |
| NM_001014445 | NLE1    | 1463 | 1536 | 7.99758753171 |
| NM_001014445 | NLE1    | 1784 | 1828 | 6.91345505338 |
| NM_005310    | GRB7    | 260  | 345  | 6.40263006794 |
| NM_005310    | GRB7    | 960  | 1057 | 7.40280381071 |
| NM_001031701 | NT5DC3  | 4869 | 4897 | 9.02644564631 |
| NM_001031701 | NT5DC3  | 4978 | 5053 | 9.03046324648 |
| NM_080725    | SRXN1   | 1798 | 1867 | 11.0536277744 |
| NM_080725    | SRXN1   | 2012 | 2059 | 10.3845327954 |
| NM_005647    | TBL1X   | 4973 | 5064 | 5.45810624424 |
| NM_005647    | TBL1X   | 3038 | 3080 | 6.5422454534  |
| NM_005647    | TBL1X   | 1595 | 1665 | 5.53822785345 |
| NM_018101    | CDCA8   | 2286 | 2329 | 6.98538852958 |
| NM_018101    | CDCA8   | 368  | 426  | 5.40042580049 |
| NM_018101    | CDCA8   | 1288 | 1331 | 6.40042602886 |
| NM_018101    | CDCA8   | 1018 | 1085 | 6.40041930535 |
| NM_018452    | C6orf35 | 1123 | 1164 | 6.78752703967 |
| NM_018452    | C6orf35 | 1245 | 1294 | 6.78350943972 |
| NM_018452    | C6orf35 | 1026 | 1114 | 6.78752030884 |
| NM_018106    | ZDHHC4  | 971  | 1020 | 5.53719353459 |

|              |                |      |      |                   |
|--------------|----------------|------|------|-------------------|
| NM_018106    | ZDHC4          | 811  | 896  | 7.12215627123     |
| NM_018106    | ZDHC4          | 198  | 379  | 9.34454869256     |
| NM_018106    | ZDHC4          | 1154 | 1227 | 5.53702002019     |
| NM_018106    | ZDHC4          | 1025 | 1148 | 9.34454869256     |
| NM_018106    | ZDHC4          | 1308 | 1390 | 7.12215627123     |
| NM_018106    | ZDHC4          | 510  | 678  | 9.23763348865     |
| NM_018106    | ZDHC4          | 701  | 796  | 7.53719377051     |
| NM_001198812 | C9orf30-TMEFF1 | 980  | 1020 | 8.42659346568     |
| NM_018109    | MTPAP          | 2004 | 2041 | 5.94727236306     |
| NM_018109    | MTPAP          | 1324 | 1403 | 5.9472788582      |
| NM_018109    | MTPAP          | 416  | 494  | 7.53224135892     |
| NM_018109    | MTPAP          | 2824 | 2878 | 6.94727236306     |
| NM_018109    | MTPAP          | 2297 | 2385 | 7.53224159484     |
| NM_018109    | MTPAP          | 618  | 669  | 5.94326149394     |
| NM_018109    | MTPAP          | 765  | 824  | 5.94727908657     |
| NM_005313    | PDIA3          | 1915 | 1988 | 2.07269977541     |
| NM_005313    | PDIA3          | 153  | 1478 | 8.04424332936     |
| NM_005313    | PDIA3          | 1479 | 1881 | 5.65766227613     |
| NM_014371    | AKAP8L         | 1071 | 1114 | 4.09762383064     |
| NM_014371    | AKAP8L         | 205  | 311  | 6.68259306242     |
| NM_014372    | RNF11          | 759  | 803  | 7.17400419583     |
| NM_014374    | REPIN1         | 2525 | 2583 | 8.02693617553     |
| NM_014374    | REPIN1         | 2623 | 2682 | 10.3490380207     |
| NM_014374    | REPIN1         | 598  | 652  | 9.02710992584     |
| NM_014374    | REPIN1         | 1765 | 1818 | 9.61189867625     |
| NM_014374    | REPIN1         | 2    | 51   | 9.02710992584     |
| NM_014374    | REPIN1         | 972  | 1009 | 8.02309232567     |
| NM_014374    | REPIN1         | 902  | 940  | 8.02693617553     |
| NM_014374    | REPIN1         | 1290 | 1330 | 8.02693617553     |
| NM_014374    | REPIN1         | 1194 | 1248 | 8.02710968993     |
| NM_014374    | REPIN1         | 392  | 491  | 10.0271099258     |
| NM_014374    | REPIN1         | 521  | 589  | 8.02710319479     |
| NM_014374    | REPIN1         | 1531 | 1568 | 7.94297071646     |
| NM_014374    | REPIN1         | 2124 | 2284 | 11.3490380207     |
| NM_014374    | REPIN1         | 1683 | 1754 | 10.3490380207     |
| NM_014374    | REPIN1         | 1977 | 2050 | 9.61206569551     |
| NM_014374    | REPIN1         | 762  | 844  | 8.02710992584     |
| NM_014374    | REPIN1         | 2290 | 2521 | 11.9340005215     |
| NM_014374    | REPIN1         | 1445 | 1495 | 8.02710992562     |
| NM_014374    | REPIN1         | 235  | 296  | 10.3488642704     |
| NM_014374    | REPIN1         | 2726 | 2820 | 11.1970349273     |
| NM_005319    | HIST1H1C       |      | 9    | 91 10.2231488137  |
| NM_005319    | HIST1H1C       |      | 395  | 447 7.8170815094  |
| NM_005319    | HIST1H1C       |      | 149  | 358 10.4861832195 |
| NM_014377    | DNAJC2         | 1319 | 1354 | 5.26958002364     |
| NM_014377    | DNAJC2         | 1626 | 1665 | 4.60065206385     |
| NM_014377    | DNAJC2         | 528  | 584  | 3.60065206385     |
| NM_014377    | DNAJC2         | 1997 | 2090 | 3.68479127324     |
| NM_005642    | TAF7           | 214  | 329  | 3.74379946811     |
| NM_005642    | TAF7           | 809  | 871  | 3.15883695984     |

|              |          |      |      |               |               |
|--------------|----------|------|------|---------------|---------------|
| NM_005642    | TAF7     | 458  | 507  | 3.15883673147 |               |
| NM_005642    | TAF7     | 1597 | 1679 | 3.74379946788 |               |
| NM_005642    | TAF7     | 1980 | 2169 | 4.96619188944 |               |
| NM_005642    | TAF7     | 1808 | 1936 | 5.15883696738 |               |
| NM_005642    | TAF7     | 47   | 208  | 3.74379946811 |               |
| NM_005643    | TAF11    | 202  | 302  | 4.08928680745 |               |
| NM_005643    | TAF11    | 973  | 1047 | 4.08526921482 |               |
| NM_005641    | TAF6     | 1791 | 1828 | 6.69767919774 |               |
| NM_005641    | TAF6     | 872  | 935  | 8.28264169846 |               |
| NM_005641    | TAF6     | 597  | 665  | 6.69767247424 |               |
| NM_005641    | TAF6     | 2053 | 2133 | 8.28264147009 |               |
| NM_005641    | TAF6     | 2206 | 2259 | 6.69767247424 |               |
| NM_005641    | TAF6     | 1934 | 2026 | 9.01960730018 |               |
| NM_005641    | TAF6     | 1497 | 1574 | 9.28264170601 |               |
| NM_005641    | TAF6     | 1596 | 1790 | 8.28264170601 |               |
| NM_005646    | TARBP1   | 2866 | 2927 | 7.43593664574 |               |
| NM_005646    | TARBP1   | 3258 | 3308 | 7.43191928149 |               |
| NM_005646    | TARBP1   | 3838 | 3917 | 6.43593015061 |               |
| NM_005646    | TARBP1   | 2122 | 2204 | 6.43593015061 |               |
| NM_005312    | RAPGEF1  | 5190 | 5253 | 5.04140974697 |               |
| NM_005312    | RAPGEF1  | 1203 | 1245 | 5.03756589711 |               |
| NM_005312    | RAPGEF1  | 3844 | 3889 | 5.04157676623 |               |
| NM_005312    | RAPGEF1  | 2230 | 2289 | 6.04157676623 |               |
| NM_005312    | RAPGEF1  | 1255 | 1347 | 5.04158349706 |               |
| NM_005312    | RAPGEF1  | 1097 | 1158 | 6.54240678862 |               |
| NM_005312    | RAPGEF1  | 5101 | 5177 | 6.04158349728 |               |
| NM_005312    | RAPGEF1  | 677  | 765  | 6.626545998   |               |
| NM_005312    | RAPGEF1  | 2660 | 2710 | 6.03756589711 |               |
| NM_005645    | TAF13    | 141  | 227  | 7.97507124614 |               |
| NM_001005910 | IP6K2    | 871  | 918  | 8.06894896114 |               |
| NM_001005914 | SEMA3B   | 1730 | 1777 | 6.05949271158 |               |
| NM_023034    | WHSC1L1  | 2835 | 2882 | 5.51463566551 |               |
| NM_023034    | WHSC1L1  | 947  | 984  | 5.51463566551 |               |
| NM_023034    | WHSC1L1  | 2553 | 2664 | 7.51865326568 |               |
| NM_023037    | FRY      | 3638 | 3691 | 8.28221261091 |               |
| NM_023037    | FRY      | 5434 | 5484 | 7.36233422012 |               |
| NM_015527    | TBC1D10B |      | 1363 | 1405          | 6.50805834901 |
| NM_015527    | TBC1D10B |      | 1607 | 1700          | 8.83400404407 |
| NM_015527    | TBC1D10B |      | 2593 | 2642          | 7.51207571326 |
| NM_015527    | TBC1D10B |      | 3045 | 3140          | 8.83400404407 |
| NM_015527    | TBC1D10B |      | 3183 | 3286          | 8.0970384499  |
| NM_015527    | TBC1D10B |      | 2836 | 2988          | 8.83400404407 |
| NM_015527    | TBC1D10B |      | 760  | 1075          | 10.3194308712 |
| NM_015527    | TBC1D10B |      | 1258 | 1358          | 6.51207594918 |
| NM_015527    | TBC1D10B |      | 1410 | 1508          | 8.51207594918 |
| NM_015527    | TBC1D10B |      | 1810 | 1867          | 8.09703844968 |
| NM_015527    | TBC1D10B |      | 541  | 618           | 7.51207594163 |
| NM_001004356 | FGFRL1   | 2977 | 3041 | 8.32472786501 |               |
| NM_001004356 | FGFRL1   | 1287 | 1330 | 7.32472786501 |               |
| NM_001079524 | PAICS    | 2656 | 2688 | 1.88173509453 |               |

|              |          |      |      |                   |
|--------------|----------|------|------|-------------------|
| NM_001079524 | PAICS    | 3162 | 3213 | 3.96587430391     |
| NM_001079524 | PAICS    | 2334 | 2392 | 4.55083680464     |
| NM_001079524 | PAICS    | 2197 | 2265 | 3.55083680464     |
| NM_001079524 | PAICS    | 1611 | 1694 | 2.96586757286     |
| NM_001079524 | PAICS    | 1396 | 1476 | 5.2878023988      |
| NM_001079524 | PAICS    | 2471 | 2567 | 3.55083680464     |
| NM_001079524 | PAICS    | 120  | 164  | 1.88173509453     |
| NM_001079524 | PAICS    | 2095 | 2186 | 3.54681920446     |
| NM_001079524 | PAICS    | 2947 | 3160 | 5.42530592255     |
| NM_001079524 | PAICS    | 1996 | 2026 | 1.96185670374     |
| NM_001079524 | PAICS    | 889  | 1170 | 7.17532766954     |
| NM_001079524 | PAICS    | 1493 | 1547 | 1.96586757286     |
| NM_001079524 | PAICS    | 547  | 883  | 7.52046315559     |
| NM_001079524 | PAICS    | 1183 | 1391 | 6.82385529904     |
| NM_001079524 | PAICS    | 2574 | 2640 | 1.96185670374     |
| NM_001079524 | PAICS    | 192  | 390  | 4.2878023988      |
| NM_032018    | C1orf124 |      | 412  | 468 7.14548064676 |
| NM_001079521 | KTN1     | 2149 | 2239 | 1.07149811619     |
| NM_001079521 | KTN1     | 4590 | 4658 | 1.07167185896     |
| NM_001079521 | KTN1     | 4329 | 4399 | 1.06765426633     |
| NM_001079521 | KTN1     | 2011 | 2134 | 2.65663436723     |
| NM_001079521 | KTN1     | 539  | 658  | 2.0716718665      |
| NM_001079521 | KTN1     | 2319 | 2374 | 2.57249515784     |
| NM_001079521 | KTN1     | 395  | 530  | 2.65663436723     |
| NM_001079521 | KTN1     | 3435 | 3502 | 1.07166513545     |
| NM_001079521 | KTN1     | 3773 | 3858 | 1.07167185896     |
| NM_001079521 | KTN1     | 876  | 1127 | 4.77211158465     |
| NM_001079521 | KTN1     | 1482 | 1569 | 1.0716718665      |
| NM_006556    | PMVK     | 752  | 837  | 8.81609619209     |
| NM_006556    | PMVK     | 127  | 177  | 6.81609595617     |
| NM_006556    | PMVK     | 642  | 677  | 8.40105869259     |
| NM_006556    | PMVK     | 355  | 462  | 9.62345111415     |
| NM_032013    | NDRG3    | 987  | 1047 | 7.72178674599     |
| NM_032013    | NDRG3    | 203  | 265  | 7.72580434616     |
| NM_032013    | NDRG3    | 602  | 714  | 8.46276994033     |
| NM_032013    | NDRG3    | 788  | 865  | 7.14084183789     |
| NM_032013    | NDRG3    | 68   | 167  | 7.14084183789     |
| NM_152857    | WTAP     | 1163 | 1232 | 4.88593074395     |
| NM_152857    | WTAP     | 924  | 974  | 3.07857581434     |
| NM_152857    | WTAP     | 1517 | 1601 | 2.07857558597     |
| NM_152857    | WTAP     | 1416 | 1461 | 3.07857582167     |
| NM_152857    | WTAP     | 434  | 495  | 2.07857582189     |
| NM_152857    | WTAP     | 306  | 358  | 3.07455822172     |
| NM_152857    | WTAP     | 576  | 661  | 3.66353832261     |
| NM_152850    | PIGO     | 1039 | 1081 | 9.41021087722     |
| NM_152850    | PIGO     | 1292 | 1357 | 11.0793125873     |
| NM_152850    | PIGO     | 224  | 298  | 11.9537817052     |
| NM_152850    | PIGO     | 2092 | 2166 | 10.0793125873     |
| NM_152850    | PIGO     | 1096 | 1147 | 8.41021087722     |
| NM_152850    | PIGO     | 626  | 699  | 10.8162781815     |

|           |          |      |      |               |               |
|-----------|----------|------|------|---------------|---------------|
| NM_152850 | PIGO     | 2386 | 2424 | 8.41021087722 |               |
| NM_152850 | PIGO     | 2294 | 2349 | 8.49434335555 |               |
| NM_152850 | PIGO     | 1636 | 1688 | 10.0793125871 |               |
| NM_152850 | PIGO     | 1570 | 1608 | 8.49434335555 |               |
| NM_152850 | PIGO     | 1164 | 1260 | 10.8162781815 |               |
| NM_152850 | PIGO     | 2174 | 2250 | 10.8162781815 |               |
| NM_152850 | PIGO     | 781  | 887  | 10.0793125873 |               |
| NM_152850 | PIGO     | 59   | 93   | 8.49417633629 |               |
| NM_152850 | PIGO     | 699  | 754  | 10.4943500866 |               |
| NM_152850 | PIGO     | 1833 | 2080 | 12.664275088  |               |
| NM_152850 | PIGO     | 924  | 981  | 8.41021087722 |               |
| NM_152850 | PIGO     | 531  | 604  | 8.49435007906 |               |
| NM_032014 | MRPS24   | 335  | 437  | 8.61558509939 |               |
| NM_032014 | MRPS24   | 233  | 322  | 8.61558509939 |               |
| NM_032014 | MRPS24   | 90   | 124  | 8.03044884835 |               |
| NM_032014 | MRPS24   | 439  | 680  | 11.6744787884 |               |
| NM_032017 | STK40    | 2754 | 2801 | 6.16262670708 |               |
| NM_032017 | STK40    | 1023 | 1083 | 5.16245295677 |               |
| NM_032017 | STK40    | 1444 | 1500 | 6.16262669954 |               |
| NM_032017 | STK40    | 1282 | 1331 | 5.0784874977  |               |
| NM_032017 | STK40    | 2223 | 2274 | 6.16261997603 |               |
| NM_032017 | STK40    | 850  | 929  | 7.16262669954 |               |
| NM_032017 | STK40    | 1561 | 1624 | 5.16262647117 |               |
| NM_032017 | STK40    | 1929 | 1974 | 5.15860910691 |               |
| NM_032017 | STK40    | 1985 | 2073 | 6.74758920781 |               |
| NM_032017 | STK40    | 2476 | 2662 | 7.48455480198 |               |
| NM_032016 | STARD3NL |      | 747  | 829           | 8.37020918798 |
| NM_032016 | STARD3NL |      | 1520 | 1570          | 5.78507293694 |
| NM_032016 | STARD3NL |      | 867  | 989           | 6.37020918798 |
| NM_032016 | STARD3NL |      | 404  | 518           | 7.9551716887  |
| NM_032016 | STARD3NL |      | 1175 | 1235          | 4.70110747788 |
| NM_003074 | SMARCC1  | 1891 | 1951 | 5.53711065615 |               |
| NM_003074 | SMARCC1  | 1493 | 1546 | 5.53309305597 |               |
| NM_003074 | SMARCC1  | 2196 | 2257 | 5.03793394748 |               |
| NM_003074 | SMARCC1  | 2849 | 2901 | 4.53309305597 |               |
| NM_003074 | SMARCC1  | 1631 | 1692 | 5.12207315687 |               |
| NM_003074 | SMARCC1  | 1779 | 1858 | 3.5371106486  |               |
| NM_003074 | SMARCC1  | 2012 | 2079 | 5.12207315665 |               |
| NM_003074 | SMARCC1  | 3577 | 3672 | 5.12207315687 |               |
| NM_018361 | AGPAT5   | 1869 | 1917 | 4.18570393437 |               |
| NM_018361 | AGPAT5   | 1285 | 1386 | 4.92266976446 |               |
| NM_018361 | AGPAT5   | 2386 | 2424 | 4.18553041997 |               |
| NM_018361 | AGPAT5   | 753  | 836  | 2.60074166202 |               |
| NM_018361 | AGPAT5   | 575  | 690  | 5.40809659163 |               |
| NM_018361 | AGPAT5   | 2961 | 3001 | 3.51660246019 |               |
| NM_018361 | AGPAT5   | 974  | 1200 | 5.77066667101 |               |
| NM_018361 | AGPAT5   | 451  | 502  | 2.5967240694  |               |
| NM_018361 | AGPAT5   | 1480 | 1587 | 4.60074166957 |               |
| NM_018361 | AGPAT5   | 3237 | 3297 | 3.5967240694  |               |
| NM_007121 | NR1H2    | 76   | 122  | 6.53225478899 |               |

|              |         |      |      |               |
|--------------|---------|------|------|---------------|
| NM_007121    | NR1H2   | 515  | 584  | 8.0370956805  |
| NM_007121    | NR1H2   | 746  | 797  | 6.53627215324 |
| NM_007121    | NR1H2   | 1508 | 1671 | 8.85820048405 |
| NM_016057    | COPZ1   | 586  | 689  | 5.96313375744 |
| NM_016057    | COPZ1   | 1196 | 1287 | 5.47770693027 |
| NM_016057    | COPZ1   | 335  | 389  | 5.47770693027 |
| NM_016057    | COPZ1   | 1335 | 1409 | 5.96313375744 |
| NM_016057    | COPZ1   | 1577 | 1625 | 3.07163962599 |
| NM_016057    | COPZ1   | 75   | 185  | 4.7407413361  |
| NM_016057    | COPZ1   | 1447 | 1497 | 4.15577859946 |
| NM_016057    | COPZ1   | 851  | 945  | 4.15577883538 |
| NM_016057    | COPZ1   | 393  | 468  | 3.15577882783 |
| NM_016057    | COPZ1   | 213  | 274  | 4.15577883538 |
| NM_016056    | TMBIM4  | 648  | 777  | 8.28673735685 |
| NM_016056    | TMBIM4  | 286  | 640  | 12.023702951  |
| NM_016056    | TMBIM4  | 159  | 237  | 8.28271975668 |
| NM_016055    | MRPL48  | 343  | 407  | 7.30547268504 |
| NM_016052    | RRP15   | 182  | 229  | 6.25788351157 |
| NM_016052    | RRP15   | 4771 | 4806 | 4.67292101085 |
| NM_016059    | PPIL1   | 639  | 724  | 4.45905609913 |
| NM_016059    | PPIL1   | 309  | 384  | 2.87409359087 |
| NM_001008530 | LGMN    | 324  | 406  | 7.39615882549 |
| NM_001008530 | LGMN    | 1687 | 1759 | 7.20351374755 |
| NM_001008530 | LGMN    | 719  | 768  | 4.39615882549 |
| NM_001008530 | LGMN    | 412  | 436  | 4.39598507517 |
| NM_001008530 | LGMN    | 2105 | 2157 | 5.39615858957 |
| NM_001008530 | LGMN    | 1621 | 1680 | 5.98112132621 |
| NM_001008530 | LGMN    | 771  | 879  | 8.09659854363 |
| NM_001008530 | LGMN    | 84   | 137  | 5.39615209444 |
| NM_001008530 | LGMN    | 1350 | 1482 | 7.20351374755 |
| NM_001008530 | LGMN    | 1257 | 1348 | 6.39615882549 |
| NM_001008530 | LGMN    | 1497 | 1604 | 7.20351374755 |
| NM_001008530 | LGMN    | 436  | 636  | 7.98112132621 |
| NM_001008530 | LGMN    | 1793 | 2020 | 8.56608382693 |
| NM_001008530 | LGMN    | 898  | 1129 | 8.56608382693 |
| NM_005835    | SLC17A2 | 943  | 976  | 7.72795782549 |
| NM_005835    | SLC17A2 | 1888 | 1947 | 8.39304193542 |
| NM_001008539 | SLC7A2  | 7362 | 7399 | 4.51568150505 |
| NM_001008539 | SLC7A2  | 1724 | 1811 | 6.92174880932 |
| NM_001008539 | SLC7A2  | 6584 | 6712 | 6.92174880932 |
| NM_001008539 | SLC7A2  | 5865 | 5900 | 4.59982071444 |
| NM_001008539 | SLC7A2  | 1549 | 1637 | 6.59982071444 |
| NM_001008539 | SLC7A2  | 4564 | 4629 | 4.59982047852 |
| NM_001008539 | SLC7A2  | 4672 | 4713 | 5.59981398338 |
| NM_001008539 | SLC7A2  | 394  | 431  | 4.59982071421 |
| NM_001008539 | SLC7A2  | 6171 | 6221 | 5.59580311426 |
| NM_001008539 | SLC7A2  | 1641 | 1714 | 7.76974571588 |
| NM_001008539 | SLC7A2  | 329  | 380  | 4.59964696412 |
| NM_001008539 | SLC7A2  | 6760 | 6812 | 6.1847764841  |
| NM_001008539 | SLC7A2  | 2195 | 2343 | 7.18478321516 |

|              |          |      |      |               |               |
|--------------|----------|------|------|---------------|---------------|
| NM_001008539 | SLC7A2   | 4457 | 4554 | 5.59982071444 |               |
| NM_001008539 | SLC7A2   | 4187 | 4302 | 5.59982071421 |               |
| NM_001008539 | SLC7A2   | 2379 | 2452 | 6.59982071444 |               |
| NM_001008539 | SLC7A2   | 3720 | 3777 | 6.18478321516 |               |
| NM_001008539 | SLC7A2   | 136  | 308  | 8.18478321516 |               |
| NM_001008539 | SLC7A2   | 456  | 844  | 10.0592523331 |               |
| NM_001008539 | SLC7A2   | 5215 | 5272 | 5.51568150505 |               |
| NM_001008539 | SLC7A2   | 1912 | 2017 | 6.59982071444 |               |
| NM_001008539 | SLC7A2   | 2131 | 2194 | 4.59981398338 |               |
| NM_001008539 | SLC7A2   | 4952 | 5080 | 5.59982071444 |               |
| NM_001008539 | SLC7A2   | 5725 | 5770 | 4.51568150505 |               |
| NM_001008539 | SLC7A2   | 4834 | 4894 | 6.1847764841  |               |
| NM_001008539 | SLC7A2   | 6241 | 6295 | 4.51568150505 |               |
| NM_001008539 | SLC7A2   | 1329 | 1543 | 8.76974571588 |               |
| NM_001008539 | SLC7A2   | 884  | 1326 | 10.2722460564 |               |
| NM_001008539 | SLC7A2   | 2912 | 3051 | 6.18478321516 |               |
| NM_173852    | KRTCAP2  | 117  | 147  | 6.90204971779 |               |
| NM_173852    | KRTCAP2  | 158  | 476  | 11.9020564488 |               |
| NM_001242898 | PPP6R2   | 346  | 398  | 5.63374029123 |               |
| NM_001242898 | PPP6R2   | 1485 | 1536 | 6.95968598629 |               |
| NM_001242898 | PPP6R2   | 1292 | 1347 | 5.63775765548 |               |
| NM_001242898 | PPP6R2   | 1132 | 1210 | 5.63775789139 |               |
| NM_001242898 | PPP6R2   | 2103 | 2163 | 4.63775116035 |               |
| NM_001242898 | PPP6R2   | 2494 | 2552 | 4.63775765548 |               |
| NM_001242898 | PPP6R2   | 406  | 558  | 6.6377578914  |               |
| NM_001242898 | PPP6R2   | 656  | 755  | 6.6377578914  |               |
| NM_001242898 | PPP6R2   | 1915 | 1996 | 6.6377578914  |               |
| NM_001242898 | PPP6R2   | 2645 | 2710 | 6.22272039212 |               |
| NM_001242898 | PPP6R2   | 2243 | 2308 | 5.63775789118 |               |
| NM_001242898 | PPP6R2   | 797  | 866  | 5.63775789118 |               |
| NM_005796    | NUTF2    | 630  | 694  | 5.45298401965 |               |
| NM_005796    | NUTF2    | 499  | 532  | 6.03777277006 |               |
| NM_001031732 | YTHDC1   | 2070 | 2114 | 5.33548834065 |               |
| NM_001031732 | YTHDC1   | 2349 | 2418 | 3.25135586232 |               |
| NM_001031732 | YTHDC1   | 1274 | 1322 | 4.33532132139 |               |
| NM_001031732 | YTHDC1   | 90   | 171  | 3.33147747153 |               |
| NM_001031732 | YTHDC1   | 1513 | 1574 | 4.33548834065 |               |
| NM_001031732 | YTHDC1   | 2667 | 2816 | 5.33549507171 |               |
| NM_001031732 | YTHDC1   | 1341 | 1420 | 5.33549507171 |               |
| NM_001031732 | YTHDC1   | 639  | 727  | 3.33549483579 |               |
| NM_001031732 | YTHDC1   | 1579 | 1840 | 7.24238566732 |               |
| NM_001031732 | YTHDC1   | 2842 | 2917 | 5.65742316659 |               |
| NM_001031732 | YTHDC1   | 2483 | 2571 | 3.33549483579 |               |
| NM_001031732 | YTHDC1   | 2421 | 2467 | 3.33147747153 |               |
| NM_004344    | CETN2    | 695  | 763  | 5.70801947223 |               |
| NM_001031738 | TMEM150A |      | 1429 | 1486          | 8.07240932384 |
| NM_001031738 | TMEM150A |      | 1078 | 1150          | 8.74151103394 |
| NM_001242892 | CSDE1    | 971  | 1030 | 4.71506737919 |               |
| NM_001242892 | CSDE1    | 2146 | 2219 | 2.39313928431 |               |
| NM_001242892 | CSDE1    | 2230 | 2290 | 2.39313928431 |               |



|              |            |      |      |                   |
|--------------|------------|------|------|-------------------|
| NM_001242892 | CSDE1      | 3457 | 3517 | 1.30900007492     |
| NM_001242892 | CSDE1      | 3379 | 3412 | 1.30900007492     |
| NM_001242892 | CSDE1      | 2538 | 2650 | 2.39313928431     |
| NM_001242892 | CSDE1      | 1074 | 1153 | 3.97810178503     |
| NM_001242892 | CSDE1      | 3168 | 3241 | 1.39313904839     |
| NM_001242892 | CSDE1      | 129  | 464  | 5.71506737919     |
| NM_001242892 | CSDE1      | 1447 | 1821 | 6.39313928431     |
| NM_001242892 | CSDE1      | 2292 | 2528 | 4.71506737919     |
| NM_001242892 | CSDE1      | 1156 | 1368 | 5.71506737919     |
| NM_001242892 | CSDE1      | 763  | 955  | 5.48060212556     |
| NM_001242892 | CSDE1      | 1879 | 2111 | 4.97810178503     |
| NM_001242892 | CSDE1      | 533  | 741  | 4.97810178503     |
| NM_001242892 | CSDE1      | 2829 | 3017 | 3.97810178503     |
| NM_024321    | RBM42      | 1430 | 1536 | 7.27252948258     |
| NM_024321    | RBM42      | 1206 | 1275 | 7.59445757746     |
| NM_024321    | RBM42      | 1285 | 1324 | 6.85749197575     |
| NM_024321    | RBM42      | 4    | 71   | 5.27252948258     |
| NM_024321    | RBM42      | 1011 | 1072 | 7.27252948258     |
| NM_024321    | RBM42      | 212  | 267  | 5.2685118824      |
| NM_024321    | RBM42      | 429  | 490  | 7.27252948258     |
| NM_024321    | RBM42      | 1539 | 1617 | 5.2685118824      |
| NM_024321    | RBM42      | 1113 | 1180 | 5.2685118824      |
| NM_024321    | RBM42      | 669  | 760  | 5.27235573226     |
| NM_024321    | RBM42      | 314  | 395  | 6.85749197575     |
| NM_016940    | RWDD2B     | 337  | 397  | 6.9836210843      |
| NM_016231    | NLK        | 1169 | 1229 | 8.94367035467     |
| NM_016231    | NLK        | 792  | 834  | 8.86354874545     |
| NM_016946    | F11R       | 2571 | 2624 | 6.67889310485     |
| NM_016946    | F11R       | 191  | 254  | 8.57038723629     |
| NM_016946    | F11R       | 2109 | 2349 | 10.9329573157     |
| NM_016946    | F11R       | 2885 | 2948 | 7.76303231424     |
| NM_016946    | F11R       | 2485 | 2531 | 7.34397721478     |
| NM_016946    | F11R       | 2669 | 2729 | 5.67889310485     |
| NM_016946    | F11R       | 3004 | 3080 | 7.76303231401     |
| NM_016946    | F11R       | 3870 | 3900 | 7.34397721478     |
| NM_016946    | F11R       | 258  | 667  | 11.8504951555     |
| NM_016946    | F11R       | 2768 | 2880 | 8.34799481496     |
| NM_016946    | F11R       | 3273 | 3356 | 6.76303231423     |
| NM_016946    | F11R       | 3193 | 3263 | 6.76303207832     |
| NM_016946    | F11R       | 673  | 1872 | 12.881973387      |
| NM_016946    | F11R       | 3515 | 3805 | 9.85049515549     |
| NM_024322    | CENPO      | 2670 | 2720 | 7.51386356521     |
| NM_024322    | CENPO      | 633  | 698  | 6.92889433365     |
| NM_024322    | CENPO      | 927  | 977  | 7.51368981511     |
| NM_024322    | CENPO      | 3793 | 3871 | 7.51386356521     |
| NM_024322    | CENPO      | 1146 | 1191 | 5.92488346453     |
| NM_024322    | CENPO      | 1006 | 1055 | 6.92488346453     |
| NM_024322    | CENPO      | 3685 | 3733 | 6.84476185532     |
| NM_024322    | CENPO      | 786  | 841  | 5.92872731439     |
| NM_001040874 | HIST2H2AA4 |      | 1    | 120 8.80842137673 |

|              |             |      |     |               |
|--------------|-------------|------|-----|---------------|
| NM_001040874 | HIST2H2AA4  | 199  | 370 | 9.39338387745 |
| NM_001040874 | HIST2H2AA4  | 377  | 452 | 8.13034947162 |
| NM_001018    | RPS15 221   | 249  |     | 3.99770927797 |
| NM_001018    | RPS15 444   | 530  |     | 2.4165906271  |
| NM_001018    | RPS15 268   | 429  |     | 5.41676437742 |
| NM_001018    | RPS15 35    | 217  |     | 6.32365497303 |
| NM_004069    | AP2S1 819   | 882  |     | 7.11414192901 |
| NM_004069    | AP2S1 303   | 426  |     | 8.69911116078 |
| NM_004069    | AP2S1 448   | 618  |     | 10.2016115013 |
| NM_004069    | AP2S1 178   | 294  |     | 8.69911116078 |
| NM_004069    | AP2S1 727   | 807  |     | 7.11414192901 |
| NM_001198934 | ABCC10 1362 | 1416 |     | 10.1994935901 |
| NM_001198934 | ABCC10 2616 | 2657 |     | 9.61435734664 |
| NM_001198934 | ABCC10 424  | 513  |     | 10.1954759975 |
| NM_001198934 | ABCC10 3287 | 3340 |     | 9.61453109695 |
| NM_001198934 | ABCC10 2898 | 2941 |     | 8.61452436591 |
| NM_001198934 | ABCC10 2456 | 2494 |     | 8.53039188758 |
| NM_001198934 | ABCC10 1207 | 1245 |     | 8.61051349679 |
| NM_001198934 | ABCC10 3012 | 3052 |     | 9.61452436591 |
| NM_001198934 | ABCC10 4741 | 4789 |     | 8.61453109674 |
| NM_001198934 | ABCC10 3512 | 3570 |     | 10.1954759975 |
| NM_001198934 | ABCC10 4494 | 4565 |     | 9.61453108941 |
| NM_001198934 | ABCC10 2718 | 2793 |     | 9.61051349679 |
| NM_001198934 | ABCC10 796  | 892  |     | 11.1994935977 |
| NM_001013    | RPS9 625    | 684  |     | 3.63877698761 |
| NM_001013    | RPS9 415    | 561  |     | 4.37574258178 |
| NM_001013    | RPS9 32     | 396  |     | 5.30174200033 |
| NM_004064    | CDKN1B 908  | 978  |     | 4.98437356294 |
| NM_001010    | RPS6 720    | 783  |     | 1.83270701142 |
| NM_001010    | RPS6 17     | 223  |     | 3.56967260559 |
| NM_001010    | RPS6 227    | 720  |     | 4.30663819975 |
| NM_001540    | HSPB1 52    | 97   |     | 5.87787571105 |
| NM_001540    | HSPB1 385   | 686  |     | 9.78476630666 |
| NM_001540    | HSPB1 734   | 887  |     | 9.9653385523  |
| NM_001540    | HSPB1 100   | 279  |     | 8.46283821177 |
| NM_001543    | NDST1 4905  | 5029 |     | 7.98586270786 |
| NM_001543    | NDST1 2499  | 2537 |     | 5.66393461275 |
| NM_001543    | NDST1 3429  | 3498 |     | 7.98586270786 |
| NM_001543    | NDST1 3518  | 3578 |     | 5.66393437706 |
| NM_001543    | NDST1 1482  | 1572 |     | 7.2488971137  |
| NM_001543    | NDST1 1710  | 1767 |     | 5.66392788192 |
| NM_001543    | NDST1 3861  | 3929 |     | 5.66393437706 |
| NM_001543    | NDST1 7252  | 7304 |     | 5.66392788192 |
| NM_001543    | NDST1 3059  | 3100 |     | 5.66376086266 |
| NM_001543    | NDST1 3719  | 3759 |     | 5.66392788192 |
| NM_001543    | NDST1 6386  | 6448 |     | 7.98585597681 |
| NM_001543    | NDST1 1142  | 1186 |     | 5.66393460542 |
| NM_001543    | NDST1 6842  | 6918 |     | 6.66393461275 |
| NM_001543    | NDST1 5996  | 6056 |     | 6.6599170128  |
| NM_001543    | NDST1 6110  | 6162 |     | 5.57979540359 |

|           |        |      |      |               |
|-----------|--------|------|------|---------------|
| NM_001543 | NDST1  | 1581 | 1677 | 7.98586270786 |
| NM_001543 | NDST1  | 1065 | 1129 | 6.66393461297 |
| NM_001543 | NDST1  | 3250 | 3337 | 6.66393461297 |
| NM_001543 | NDST1  | 1333 | 1386 | 7.24889711369 |
| NM_001543 | NDST1  | 4137 | 4177 | 6.66392788192 |
| NM_001543 | NDST1  | 4361 | 4418 | 6.66393437706 |
| NM_001543 | NDST1  | 1928 | 2053 | 7.66393461297 |
| NM_001543 | NDST1  | 2075 | 2140 | 6.66393461297 |
| NM_001543 | NDST1  | 2842 | 2886 | 7.24487951352 |
| NM_001543 | NDST1  | 384  | 428  | 6.66392788192 |
| NM_001543 | NDST1  | 4678 | 4785 | 7.98586270786 |
| NM_001543 | NDST1  | 7908 | 7961 | 6.66393460542 |
| NM_001543 | NDST1  | 742  | 816  | 5.66393460542 |
| NM_001543 | NDST1  | 7720 | 7770 | 5.66393461297 |
| NM_001543 | NDST1  | 511  | 658  | 7.98586270786 |
| NM_001543 | NDST1  | 5147 | 5239 | 7.66393461297 |
| NM_001543 | NDST1  | 2324 | 2428 | 8.2488971137  |
| NM_001543 | NDST1  | 2937 | 3031 | 8.2488971137  |
| NM_001543 | NDST1  | 5624 | 5791 | 9.12336623161 |
| NM_001543 | NDST1  | 4786 | 4848 | 5.66392788192 |
| NM_001543 | NDST1  | 5284 | 5429 | 7.66393461297 |
| NM_001543 | NDST1  | 4601 | 4664 | 6.66376086266 |
| NM_001543 | NDST1  | 5458 | 5553 | 5.66393460542 |
| NM_001014 | RPS10  | 56   | 220  | 4.59254594012 |
| NM_001014 | RPS10  | 232  | 628  | 6.5560200641  |
| NM_000946 | PRIM1  | 104  | 183  | 8.77743370798 |
| NM_000946 | PRIM1  | 1227 | 1305 | 8.19264495003 |
| NM_000946 | PRIM1  | 913  | 961  | 8.10850574819 |
| NM_000946 | PRIM1  | 559  | 643  | 8.19264495758 |
| NM_000946 | PRIM1  | 348  | 536  | 9.51457305247 |
| NM_144508 | CASC5  | 4275 | 4326 | 8.64483386112 |
| NM_144508 | CASC5  | 2710 | 2791 | 7.72896633945 |
| NM_144508 | CASC5  | 5980 | 6062 | 8.72897307028 |
| NM_000945 | PPP3R1 | 881  | 920  | 5.08657492686 |
| NM_000945 | PPP3R1 | 925  | 991  | 5.08658165791 |
| NM_000945 | PPP3R1 | 698  | 752  | 5.08658165791 |
| NM_000945 | PPP3R1 | 2659 | 2723 | 4.66752655846 |
| NM_000945 | PPP3R1 | 816  | 875  | 4.08657492686 |
| NM_000945 | PPP3R1 | 1084 | 1153 | 3.08657492686 |
| NM_000945 | PPP3R1 | 2564 | 2629 | 4.08657492686 |
| NM_000945 | PPP3R1 | 73   | 183  | 5.08658165791 |
| NM_000945 | PPP3R1 | 414  | 557  | 6.4085097528  |
| NM_000945 | PPP3R1 | 757  | 798  | 4.00244244853 |
| NM_000945 | PPP3R1 | 2899 | 2940 | 3.0864079076  |
| NM_000945 | PPP3R1 | 1498 | 1534 | 4.00244244853 |
| NM_000945 | PPP3R1 | 2142 | 2289 | 5.4085097528  |
| NM_007262 | PARK7  | 296  | 343  | 2.92253024602 |
| NM_007262 | PARK7  | 150  | 289  | 3.92253025357 |
| NM_007262 | PARK7  | 660  | 899  | 4.09245525502 |
| NM_007262 | PARK7  | 346  | 646  | 5.17045776702 |

|              |        |      |      |               |
|--------------|--------|------|------|---------------|
| NM_007260    | LYPLA2 | 1532 | 1618 | 8.67110657625 |
| NM_007260    | LYPLA2 | 865  | 932  | 5.67110657625 |
| NM_007260    | LYPLA2 | 418  | 479  | 7.25606907697 |
| NM_007260    | LYPLA2 | 1212 | 1271 | 5.67110657603 |
| NM_007260    | LYPLA2 | 251  | 344  | 7.67110657625 |
| NM_007260    | LYPLA2 | 166  | 242  | 7.67110657625 |
| NM_000941    | POR    | 2354 | 2430 | 2.32240591067 |
| NM_000941    | POR    | 140  | 230  | 6.40986875192 |
| NM_000941    | POR    | 2445 | 2503 | 4.64433400555 |
| NM_000941    | POR    | 1832 | 1878 | 3.90736841139 |
| NM_000941    | POR    | 1180 | 1298 | 5.32240591067 |
| NM_000941    | POR    | 1373 | 1543 | 6.22929650627 |
| NM_000941    | POR    | 1314 | 1368 | 4.32240591067 |
| NM_000941    | POR    | 813  | 1168 | 7.60780812953 |
| NM_000941    | POR    | 1890 | 2286 | 7.49233091211 |
| NM_000941    | POR    | 1546 | 1685 | 2.32240591067 |
| NM_000941    | POR    | 59   | 139  | 3.32240591067 |
| NM_000941    | POR    | 1707 | 1829 | 4.90736841139 |
| NM_000941    | POR    | 243  | 802  | 8.12976083272 |
| NM_139164    | STARD4 | 310  | 367  | 5.9394464525  |
| NM_139164    | STARD4 | 1855 | 1909 | 5.85932484329 |
| NM_139164    | STARD4 | 1055 | 1120 | 6.94346405245 |
| NM_139164    | STARD4 | 713  | 769  | 6.9394464525  |
| NM_139164    | STARD4 | 439  | 521  | 6.94345732162 |
| NM_001142463 | DKC1   | 661  | 708  | 4.74429433641 |
| NM_001142463 | DKC1   | 2133 | 2212 | 5.15532096657 |
| NM_001142463 | DKC1   | 2473 | 2509 | 3.07519935736 |
| NM_001142463 | DKC1   | 733  | 773  | 4.15916481642 |
| NM_001142463 | DKC1   | 2326 | 2401 | 5.15933856674 |
| NM_001142463 | DKC1   | 1192 | 1236 | 4.74430105991 |
| NM_001142463 | DKC1   | 1059 | 1163 | 5.74430106746 |
| NM_001142463 | DKC1   | 795  | 1058 | 7.15933856674 |
| NM_001142463 | DKC1   | 264  | 463  | 5.74430106746 |
| NM_001142463 | DKC1   | 478  | 654  | 5.9666934888  |
| NM_003943    | STBD1  | 794  | 852  | 4.70854691432 |
| NM_003943    | STBD1  | 2043 | 2125 | 5.7926861237  |
| NM_003943    | STBD1  | 1034 | 1161 | 6.37764862443 |
| NM_032019    | HDAC10 | 1596 | 1663 | 8.37242425881 |
| NM_032019    | HDAC10 | 851  | 891  | 9.36840665864 |
| NM_032019    | HDAC10 | 432  | 478  | 8.28828504943 |
| NM_003941    | WASL   | 1034 | 1085 | 5.83069988413 |
| NM_003941    | WASL   | 1878 | 1956 | 8.15664557919 |
| NM_003941    | WASL   | 1795 | 1857 | 7.41967998502 |
| NM_003941    | WASL   | 4091 | 4197 | 5.8347174843  |
| NM_003941    | WASL   | 434  | 541  | 8.64207240636 |
| NM_003941    | WASL   | 564  | 625  | 5.83471724839 |
| NM_003941    | WASL   | 2817 | 2892 | 6.83471075325 |
| NM_003940    | USP13  | 424  | 484  | 6.21830157609 |
| NM_003940    | USP13  | 1991 | 2046 | 5.21429070697 |
| NM_003940    | USP13  | 599  | 643  | 5.21429070697 |

|              |          |      |      |               |               |
|--------------|----------|------|------|---------------|---------------|
| NM_003940    | USP13    | 2389 | 2478 | 5.21830157609 |               |
| NM_003940    | USP13    | 1420 | 1531 | 6.79925320769 |               |
| NM_003945    | ATP6V0E1 |      | 110  | 188           | 9.75713214803 |
| NM_003945    | ATP6V0E1 |      | 208  | 395           | 12.0790602429 |
| NM_003945    | ATP6V0E1 |      | 498  | 764           | 11.2717053209 |
| NM_003944    | SELENBP1 |      | 293  | 366           | 8.76288229235 |
| NM_003944    | SELENBP1 |      | 559  | 598           | 7.0937873133  |
| NM_003944    | SELENBP1 |      | 1470 | 1532          | 8.76288229235 |
| NM_138689    | PPP1R14B |      | 888  | 975           | 5.09920709665 |
| NM_138689    | PPP1R14B |      | 717  | 781           | 2.29184544354 |
| NM_138689    | PPP1R14B |      | 436  | 710           | 6.53977968804 |
| NM_020675    | SPC25    | 1045 | 1109 | 6.68985198735 |               |
| NM_020675    | SPC25    | 1256 | 1309 | 6.10488948663 |               |
| NM_020675    | SPC25    | 1183 | 1244 | 5.10488948663 |               |
| NM_020675    | SPC25    | 1124 | 1161 | 5.10488925071 |               |
| NM_020672    | S100A14  | 884  | 932  | 8.06315615429 |               |
| NM_020672    | S100A14  | 16   | 216  | 11.2347582049 |               |
| NM_020672    | S100A14  | 948  | 1037 | 8.14729536367 |               |
| NM_020672    | S100A14  | 227  | 883  | 13.3761140542 |               |
| NM_003804    | RIPK1    | 3407 | 3462 | 7.09586872796 |               |
| NM_003804    | RIPK1    | 498  | 566  | 6.01574711875 |               |
| NM_003804    | RIPK1    | 2211 | 2257 | 6.09988632059 |               |
| NM_003804    | RIPK1    | 2490 | 2566 | 8.09971257782 |               |
| NM_001080414 | CCDC88C  | 3386 | 3466 | 8.71187857875 |               |
| NM_001080414 | CCDC88C  | 7237 | 7315 | 9.29683458434 |               |
| NM_001080415 | U2SURP   | 2206 | 2250 | 4.25183506985 |               |
| NM_001080415 | U2SURP   | 2106 | 2150 | 3.33596754818 |               |
| NM_001080415 | U2SURP   | 3214 | 3280 | 5.33597427923 |               |
| NM_001080415 | U2SURP   | 3505 | 3573 | 3.33195667906 |               |
| NM_001080415 | U2SURP   | 3308 | 3373 | 4.33597427901 |               |
| NM_001080415 | U2SURP   | 1682 | 1741 | 3.33195667906 |               |
| NM_001080415 | U2SURP   | 1388 | 1424 | 3.33195667906 |               |
| NM_001080415 | U2SURP   | 3416 | 3499 | 4.33597427923 |               |
| NM_001080415 | U2SURP   | 2359 | 2455 | 5.33597427168 |               |
| NM_024771    | NAA40    | 909  | 936  | 8.03478956665 |               |
| NM_024771    | NAA40    | 2852 | 2907 | 9.11491117586 |               |
| NM_024771    | NAA40    | 1607 | 1637 | 8.61975206737 |               |
| NM_024771    | NAA40    | 496  | 539  | 7.11491117586 |               |
| NM_024771    | NAA40    | 1701 | 1732 | 7.11491117586 |               |
| NM_024771    | NAA40    | 805  | 895  | 7.11892876848 |               |
| NM_024771    | NAA40    | 1239 | 1380 | 7.11892876848 |               |
| NM_024771    | NAA40    | 2273 | 2407 | 8.70389127675 |               |
| NM_024771    | NAA40    | 685  | 777  | 9.11892877603 |               |
| NM_024770    | METTL8   | 2943 | 2977 | 5.74210073672 |               |
| NM_024770    | METTL8   | 954  | 996  | 7.73808337246 |               |
| NM_024770    | METTL8   | 684  | 730  | 5.65796176325 |               |
| NM_024770    | METTL8   | 819  | 877  | 6.74209424158 |               |
| NM_024770    | METTL8   | 1007 | 1096 | 8.06402906753 |               |
| NM_024770    | METTL8   | 3405 | 3489 | 6.74210097264 |               |
| NM_024776    | PEAK1    | 5108 | 5147 | 8.19839163164 |               |

|              |        |       |       |               |
|--------------|--------|-------|-------|---------------|
| NM_024776    | PEAK1  | 8725  | 8794  | 9.11442617257 |
| NM_024776    | PEAK1  | 5722  | 5843  | 8.19856538196 |
| NM_024776    | PEAK1  | 11548 | 11632 | 9.11442617257 |
| NM_001080412 | ZBTB38 | 4231  | 4295  | 8.48289940348 |
| NM_001080412 | ZBTB38 | 5561  | 5668  | 9.48289940348 |
| NM_001080412 | ZBTB38 | 6685  | 6733  | 6.81379769337 |
| NM_001080412 | ZBTB38 | 1860  | 1923  | 8.89793690276 |
| NM_001080412 | ZBTB38 | 4972  | 5058  | 9.48289940348 |
| NM_001080412 | ZBTB38 | 1999  | 2062  | 6.89776315244 |
| NM_001080412 | ZBTB38 | 1152  | 1238  | 8.89793690276 |
| NM_001080412 | ZBTB38 | 6405  | 6467  | 6.89776315244 |
| NM_001080412 | ZBTB38 | 866   | 936   | 8.48289939593 |
| NM_001080412 | ZBTB38 | 3355  | 3402  | 6.89793666684 |
| NM_001080412 | ZBTB38 | 4772  | 4844  | 7.89793690276 |
| NM_001080412 | ZBTB38 | 4538  | 4581  | 7.81379769337 |
| NM_001080412 | ZBTB38 | 4898  | 4961  | 6.89776315244 |
| NM_001080412 | ZBTB38 | 3681  | 3728  | 7.89793690254 |
| NM_001080412 | ZBTB38 | 6952  | 6996  | 7.8979301717  |
| NM_001080412 | ZBTB38 | 3992  | 4038  | 8.48289939593 |
| NM_001080412 | ZBTB38 | 5184  | 5285  | 9.21986499765 |
| NM_001080412 | ZBTB38 | 3092  | 3141  | 6.89793690275 |
| NM_001080412 | ZBTB38 | 6047  | 6115  | 6.89793689521 |
| NM_001080412 | ZBTB38 | 2243  | 2315  | 6.89776315244 |
| NM_001080412 | ZBTB38 | 2367  | 2439  | 7.89793690276 |
| NM_001080412 | ZBTB38 | 941   | 1072  | 9.48289940348 |
| NM_001080412 | ZBTB38 | 5294  | 5383  | 8.48289940326 |
| NM_001080412 | ZBTB38 | 423   | 520   | 9.70529182482 |
| NM_001080412 | ZBTB38 | 5883  | 5941  | 6.89391930259 |
| NM_001080412 | ZBTB38 | 2958  | 3091  | 10.0678619042 |
| NM_001080412 | ZBTB38 | 4093  | 4213  | 10.2198649976 |
| NM_001080412 | ZBTB38 | 2747  | 2931  | 10.2198649976 |
| NM_001080412 | ZBTB38 | 6207  | 6355  | 8.48289940348 |
| NM_001080412 | ZBTB38 | 1258  | 1413  | 9.89793690276 |
| NM_001080412 | ZBTB38 | 6736  | 6852  | 7.89793690276 |
| NM_001080412 | ZBTB38 | 2462  | 2535  | 9.21986499765 |
| NM_001080412 | ZBTB38 | 742   | 829   | 7.89391930259 |
| NM_001080412 | ZBTB38 | 1647  | 1762  | 7.89793690275 |
| NM_001080412 | ZBTB38 | 248   | 358   | 9.48289940348 |
| NM_001080412 | ZBTB38 | 5795  | 5881  | 7.8979301717  |
| NM_001080412 | ZBTB38 | 5962  | 6024  | 6.89391930259 |
| NM_001080412 | ZBTB38 | 1484  | 1607  | 9.70529182482 |
| NM_001080412 | ZBTB38 | 5096  | 5160  | 8.48289939593 |
| NM_024958    | NRSN2  | 727   | 797   | 9.77773447287 |
| NM_024958    | NRSN2  | 1945  | 2002  | 9.04076864279 |
| NM_024958    | NRSN2  | 1102  | 1135  | 7.45178877781 |
| NM_024958    | NRSN2  | 373   | 430   | 8.3716671686  |
| NM_024956    | TMEM62 | 1186  | 1228  | 6.22782528673 |
| NM_024956    | TMEM62 | 2086  | 2171  | 8.22783201778 |
| NM_024956    | TMEM62 | 1243  | 1298  | 7.1436928084  |
| NM_024956    | TMEM62 | 697   | 793   | 7.81278778745 |

|              |         |      |      |               |
|--------------|---------|------|------|---------------|
| NM_024779    | PIP4K2C | 2011 | 2072 | 7.69127827259 |
| NM_024779    | PIP4K2C | 1045 | 1115 | 8.27624078086 |
| NM_024779    | PIP4K2C | 1490 | 1570 | 9.69127828014 |
| NM_024779    | PIP4K2C | 536  | 642  | 9.27624078086 |
| NM_024779    | PIP4K2C | 423  | 495  | 9.01320637503 |
| NM_024779    | PIP4K2C | 2346 | 2376 | 6.60713907076 |
| NM_024779    | PIP4K2C | 2228 | 2277 | 7.60713907076 |
| NM_024779    | PIP4K2C | 2460 | 2535 | 9.69127828014 |
| NM_024779    | PIP4K2C | 681  | 732  | 6.69127827992 |
| NM_024779    | PIP4K2C | 2167 | 2215 | 6.60713907076 |
| NM_024779    | PIP4K2C | 1353 | 1475 | 8.27624078086 |
| NM_024779    | PIP4K2C | 1575 | 1732 | 10.3917179983 |
| NM_024779    | PIP4K2C | 2739 | 2858 | 9.01320637503 |
| NM_024779    | PIP4K2C | 888  | 1022 | 10.1507098988 |
| NM_024779    | PIP4K2C | 1734 | 1849 | 9.4986332022  |
| NM_024779    | PIP4K2C | 2943 | 3171 | 9.4986332022  |
| NM_024953    | NAA25   | 452  | 521  | 7.16855684339 |
| NM_024953    | NAA25   | 2118 | 2182 | 7.17240069324 |
| NM_024953    | NAA25   | 826  | 921  | 8.17257443601 |
| NM_024953    | NAA25   | 1361 | 1415 | 6.17240069324 |
| NM_024953    | NAA25   | 1262 | 1295 | 7.16855684339 |
| NM_024953    | NAA25   | 1027 | 1086 | 6.17240069324 |
| NM_024953    | NAA25   | 2554 | 2648 | 7.75753021323 |
| NM_024953    | NAA25   | 1673 | 1754 | 7.17257444334 |
| NM_001080419 | UNK     | 3255 | 3278 | 7.74861006843 |
| NM_017548    | CDV3    | 3317 | 3360 | 5.67537540813 |
| NM_017548    | CDV3    | 912  | 980  | 3.67520165781 |
| NM_017548    | CDV3    | 1000 | 1086 | 5.26033790885 |
| NM_017548    | CDV3    | 2659 | 2713 | 4.67537517221 |
| NM_017548    | CDV3    | 2366 | 2429 | 6.67537540813 |
| NM_017548    | CDV3    | 2585 | 2657 | 3.67537540813 |
| NM_017548    | CDV3    | 3020 | 3085 | 5.26033790885 |
| NM_017548    | CDV3    | 667  | 730  | 4.67537540813 |
| NM_017548    | CDV3    | 2232 | 2356 | 6.48273033019 |
| NM_017548    | CDV3    | 1986 | 2086 | 5.67537540813 |
| NM_017548    | CDV3    | 1352 | 1417 | 4.67537540791 |
| NM_017548    | CDV3    | 3150 | 3295 | 6.26033790885 |
| NM_017548    | CDV3    | 1433 | 1492 | 3.67135780796 |
| NM_017548    | CDV3    | 2437 | 2571 | 6.99730350302 |
| NM_017548    | CDV3    | 1530 | 1676 | 6.48273033019 |
| NM_017548    | CDV3    | 1701 | 1912 | 7.26033790885 |
| NM_017548    | CDV3    | 1256 | 1351 | 5.26033790885 |
| NM_017548    | CDV3    | 773  | 849  | 3.67537540813 |
| NM_017549    | EPDR1   | 917  | 969  | 7.50450462246 |
| NM_017549    | EPDR1   | 1773 | 1814 | 7.08946712318 |
| NM_017549    | EPDR1   | 2335 | 2393 | 6.50834847232 |
| NM_017549    | EPDR1   | 2090 | 2180 | 8.50852222263 |
| NM_017549    | EPDR1   | 621  | 704  | 8.50852222263 |
| NM_017549    | EPDR1   | 706  | 779  | 7.09348472335 |
| NM_017549    | EPDR1   | 1165 | 1341 | 8.50852222263 |

|              |         |      |      |               |
|--------------|---------|------|------|---------------|
| NM_017549    | EPDR1   | 291  | 343  | 6.50851549158 |
| NM_017549    | EPDR1   | 1900 | 2053 | 8.96795384127 |
| NM_017549    | EPDR1   | 806  | 911  | 5.50852222263 |
| NM_017549    | EPDR1   | 1078 | 1150 | 7.09348472335 |
| NM_017549    | EPDR1   | 2220 | 2321 | 5.50852222263 |
| NM_001167935 | CCM2    | 292  | 331  | 6.24474672321 |
| NM_001167935 | CCM2    | 494  | 530  | 6.24492023761 |
| NM_001167935 | CCM2    | 1517 | 1567 | 7.24492046598 |
| NM_001167935 | CCM2    | 756  | 803  | 7.74574376487 |
| NM_001167935 | CCM2    | 441  | 479  | 6.24492047331 |
| NM_001167935 | CCM2    | 1083 | 1187 | 8.24492047353 |
| NM_017542    | POGK    | 1688 | 1721 | 7.25094072487 |
| NM_017542    | POGK    | 3101 | 3150 | 7.25094096079 |
| NM_017542    | POGK    | 441  | 521  | 8.25094096079 |
| NM_017542    | POGK    | 279  | 318  | 6.16680175141 |
| NM_017542    | POGK    | 3198 | 3237 | 7.24692336062 |
| NM_017542    | POGK    | 2398 | 2475 | 8.25094095324 |
| NM_017542    | POGK    | 1911 | 1961 | 7.25094096079 |
| NM_017542    | POGK    | 2897 | 2945 | 6.24692336062 |
| NM_017542    | POGK    | 3415 | 3468 | 7.83188586134 |
| NM_017542    | POGK    | 3627 | 3707 | 7.25094072487 |
| NM_001135726 | HMB0X1  | 2182 | 2237 | 5.91426494577 |
| NM_017546    | C2orf29 | 1147 | 1229 | 6.26114066167 |
| NM_017546    | C2orf29 | 810  | 869  | 5.67617792504 |
| NM_017546    | C2orf29 | 624  | 710  | 6.26114066168 |
| NM_017546    | C2orf29 | 1895 | 1962 | 5.6761714299  |
| NM_017546    | C2orf29 | 871  | 952  | 5.67617816096 |
| NM_017546    | C2orf29 | 1753 | 1816 | 5.67617792504 |
| NM_017546    | C2orf29 | 1007 | 1081 | 5.67617816073 |
| NM_017546    | C2orf29 | 1470 | 1704 | 8.76364100221 |
| NM_017546    | C2orf29 | 2172 | 2279 | 4.67617816096 |
| NM_017546    | C2orf29 | 1279 | 1461 | 7.99810625584 |
| NM_017546    | C2orf29 | 2371 | 2432 | 5.59203895157 |
| NM_138319    | PCSK6   | 198  | 228  | 5.01189790295 |
| NM_138319    | PCSK6   | 3558 | 3625 | 4.92775869357 |
| NM_138319    | PCSK6   | 3026 | 3074 | 4.92775869357 |
| NM_138319    | PCSK6   | 2050 | 2135 | 7.01189790295 |
| NM_138319    | PCSK6   | 1507 | 1573 | 6.59686016776 |
| NM_017544    | NKRF    | 2425 | 2487 | 9.08659275639 |
| NM_017544    | NKRF    | 2337 | 2420 | 6.76850851136 |
| NM_017544    | NKRF    | 511  | 554  | 6.76466466151 |
| NM_017544    | NKRF    | 1051 | 1130 | 7.76466466151 |
| NM_017544    | NKRF    | 1483 | 1598 | 8.35364476218 |
| NM_032012    | C9orf5  | 844  | 890  | 6.35003356639 |
| NM_032012    | C9orf5  | 1424 | 1486 | 8.35003380231 |
| NM_032012    | C9orf5  | 768  | 803  | 7.34986005199 |
| NM_032012    | C9orf5  | 296  | 375  | 7.67196189719 |
| NM_032012    | C9orf5  | 3114 | 3170 | 6.93482255271 |
| NM_032012    | C9orf5  | 2485 | 2545 | 7.67196166128 |
| NM_032012    | C9orf5  | 6276 | 6352 | 5.35002707126 |



|              |         |      |      |               |
|--------------|---------|------|------|---------------|
| NM_032012    | C9orf5  | 2623 | 2716 | 7.6719618972  |
| NM_032012    | C9orf5  | 1876 | 2028 | 9.05047352045 |
| NM_032012    | C9orf5  | 3261 | 3307 | 5.34601620214 |
| NM_032012    | C9orf5  | 2113 | 2214 | 8.35003380231 |
| NM_032012    | C9orf5  | 2901 | 2993 | 5.34986005199 |
| NM_032012    | C9orf5  | 587  | 760  | 9.43749664356 |
| NM_032012    | C9orf5  | 1001 | 1241 | 8.80946542095 |
| NM_032012    | C9orf5  | 2271 | 2410 | 7.35003380231 |
| NM_032012    | C9orf5  | 1612 | 1862 | 9.15738872437 |
| NM_032138    | KBTBD7  | 785  | 840  | 8.85672133078 |
| NM_032015    | RNF26   | 848  | 921  | 8.16060515608 |
| NM_032015    | RNF26   | 2430 | 2498 | 8.16059842503 |
| NM_032015    | RNF26   | 1755 | 1793 | 7.16059842503 |
| NM_032015    | RNF26   | 743  | 799  | 9.48253325097 |
| NM_032015    | RNF26   | 639  | 697  | 9.16060515608 |
| NM_032015    | RNF26   | 336  | 384  | 9.16060514853 |
| NM_032015    | RNF26   | 2606 | 2644 | 8.74539390648 |
| NM_032015    | RNF26   | 576  | 614  | 8.16043140576 |
| NM_032015    | RNF26   | 1288 | 1350 | 8.74556092575 |
| NM_032015    | RNF26   | 391  | 481  | 9.16060515608 |
| NM_032015    | RNF26   | 1970 | 2025 | 7.16043140576 |
| NM_004683    | RGN     | 1549 | 1583 | 4.22130991061 |
| NM_005920    | MEF2D   | 2158 | 2207 | 8.90117654781 |
| NM_005920    | MEF2D   | 5780 | 5820 | 7.23609243788 |
| NM_005920    | MEF2D   | 3943 | 3996 | 7.32005789695 |
| NM_005920    | MEF2D   | 434  | 498  | 7.31621404709 |
| NM_005920    | MEF2D   | 4121 | 4202 | 8.31621404709 |
| NM_004687    | MTMR4   | 3119 | 3193 | 5.33930831393 |
| NM_004687    | MTMR4   | 3462 | 3502 | 6.84013184119 |
| NM_004687    | MTMR4   | 3964 | 4020 | 5.33529094968 |
| NM_004687    | MTMR4   | 5358 | 5451 | 6.3393018188  |
| NM_004687    | MTMR4   | 4148 | 4185 | 6.3393018188  |
| NM_004687    | MTMR4   | 944  | 992  | 7.25516934047 |
| NM_004687    | MTMR4   | 4628 | 4692 | 5.33529094968 |
| NM_004687    | MTMR4   | 3514 | 3602 | 6.33930831393 |
| NM_004687    | MTMR4   | 2565 | 2648 | 6.33930854984 |
| NM_004687    | MTMR4   | 4696 | 4789 | 6.33930831393 |
| NM_001001852 | PIM3    | 2141 | 2208 | 6.78529495361 |
| NM_001001852 | PIM3    | 1131 | 1209 | 9.59666747584 |
| NM_001001852 | PIM3    | 1930 | 1997 | 8.78931255378 |
| NM_001001852 | PIM3    | 1431 | 1484 | 7.78529495361 |
| NM_001001852 | PIM3    | 963  | 1004 | 8.3742750545  |
| NM_001001852 | PIM3    | 1338 | 1402 | 6.78930582273 |
| NM_001001852 | PIM3    | 1514 | 1603 | 7.78931255378 |
| NM_001001852 | PIM3    | 839  | 894  | 7.78931255356 |
| NM_001668    | ARNT    | 2688 | 2732 | 5.35924666237 |
| NM_001668    | ARNT    | 659  | 712  | 6.35924666237 |
| NM_001668    | ARNT    | 991  | 1107 | 7.76531396664 |
| NM_030929    | KAZALD1 | 803  | 851  | 9.93263488311 |
| NM_001165031 | DTYMK   | 987  | 1088 | 7.08337268868 |

|              |         |      |      |               |
|--------------|---------|------|------|---------------|
| NM_001165031 | DTYMK   | 829  | 909  | 6.34640036346 |
| NM_001165031 | DTYMK   | 609  | 652  | 7.08337268868 |
| NM_001165031 | DTYMK   | 531  | 580  | 5.76144435787 |
| NM_001165031 | DTYMK   | 429  | 495  | 6.34640709451 |
| NM_001165031 | DTYMK   | 295  | 426  | 8.22087621243 |
| NM_001165031 | DTYMK   | 675  | 716  | 5.67730538441 |
| NM_001165031 | DTYMK   | 927  | 978  | 5.76144435787 |
| NM_001193513 | SLC30A6 | 680  | 766  | 9.9837245579  |
| NM_001193513 | SLC30A6 | 1018 | 1076 | 9.5686870584  |
| NM_001193513 | SLC30A6 | 461  | 508  | 8.98372455035 |
| NM_001193513 | SLC30A6 | 778  | 821  | 8.97970695773 |
| NM_001193513 | SLC30A6 | 1612 | 1655 | 9.5686868227  |
| NM_001193513 | SLC30A6 | 1119 | 1222 | 10.5686870586 |
| NM_001193513 | SLC30A6 | 117  | 219  | 10.79107948   |
| NM_001193513 | SLC30A6 | 822  | 896  | 10.79107948   |
| NM_001193513 | SLC30A6 | 1451 | 1503 | 9.56868705107 |
| NM_001193513 | SLC30A6 | 1230 | 1307 | 9.98355080758 |
| NM_001193513 | SLC30A6 | 531  | 674  | 10.79107948   |
| NM_006133    | DAGLA   | 549  | 616  | 11.0392015836 |
| NM_006133    | DAGLA   | 2582 | 2639 | 10.0391948525 |
| NM_006133    | DAGLA   | 186  | 290  | 10.0392015836 |
| NM_006133    | DAGLA   | 4964 | 5026 | 9.03920158355 |
| NM_006133    | DAGLA   | 1622 | 1699 | 10.0392015833 |
| NM_006133    | DAGLA   | 509  | 549  | 9.03518398338 |
| NM_006133    | DAGLA   | 299  | 336  | 9.03902783324 |
| NM_006133    | DAGLA   | 4155 | 4213 | 9.03518398338 |
| NM_006133    | DAGLA   | 1169 | 1280 | 10.039201576  |
| NM_006133    | DAGLA   | 5065 | 5159 | 10.0392013476 |
| NM_006135    | CAPZA1  | 1244 | 1314 | 5.66491151878 |
| NM_006135    | CAPZA1  | 1992 | 2066 | 4.92794592462 |
| NM_006135    | CAPZA1  | 1833 | 1907 | 4.92794592462 |
| NM_006135    | CAPZA1  | 2578 | 2650 | 3.34298342367 |
| NM_006135    | CAPZA1  | 784  | 856  | 5.66491151878 |
| NM_006135    | CAPZA1  | 1931 | 1989 | 6.15033834595 |
| NM_006135    | CAPZA1  | 2348 | 2423 | 5.34298342389 |
| NM_006135    | CAPZA1  | 393  | 444  | 5.66491151856 |
| NM_006135    | CAPZA1  | 1185 | 1225 | 4.34298342367 |
| NM_006135    | CAPZA1  | 2531 | 2568 | 4.92793919356 |
| NM_006135    | CAPZA1  | 2653 | 2696 | 4.34280967358 |
| NM_006135    | CAPZA1  | 1076 | 1114 | 3.25884421451 |
| NM_006135    | CAPZA1  | 965  | 1071 | 5.34298342389 |
| NM_006135    | CAPZA1  | 874  | 931  | 4.92794592439 |
| NM_006135    | CAPZA1  | 2282 | 2338 | 4.92794592462 |
| NM_006135    | CAPZA1  | 721  | 775  | 5.34298342389 |
| NM_006135    | CAPZA1  | 1324 | 1540 | 7.34298342389 |
| NM_006135    | CAPZA1  | 480  | 688  | 6.80241504253 |
| NM_006135    | CAPZA1  | 1557 | 1833 | 6.92794592462 |
| NM_003417    | ZNF264  | 7804 | 7830 | 8.73131814907 |
| NM_003417    | ZNF264  | 746  | 786  | 8.64735269001 |
| NM_003417    | ZNF264  | 409  | 485  | 8.73149189184 |

|              |         |      |      |                |
|--------------|---------|------|------|----------------|
| NM_003417    | ZNF264  | 7276 | 7347 | 8.73149166347  |
| NM_006136    | CAPZA2  | 1335 | 1392 | 5.37915292466  |
| NM_006136    | CAPZA2  | 82   | 147  | 4.96411566129  |
| NM_006136    | CAPZA2  | 1549 | 1592 | 3.29501395119  |
| NM_006136    | CAPZA2  | 169  | 248  | 4.9641156613   |
| NM_006136    | CAPZA2  | 579  | 637  | 5.96411566107  |
| NM_006136    | CAPZA2  | 1172 | 1201 | 4.37915292466  |
| NM_006136    | CAPZA2  | 764  | 936  | 6.83858477921  |
| NM_006136    | CAPZA2  | 1761 | 1808 | 3.37914642952  |
| NM_006136    | CAPZA2  | 256  | 550  | 6.9641156613   |
| NM_003418    | CNBP    | 331  | 429  | 4.17617062421  |
| NM_003418    | CNBP    | 737  | 825  | 4.55468224746  |
| NM_003418    | CNBP    | 1522 | 1568 | 0.850224929147 |
| NM_003418    | CNBP    | 619  | 730  | 2.43920503004  |
| NM_003418    | CNBP    | 433  | 617  | 4.31367414796  |
| NM_003418    | CNBP    | 885  | 1000 | 3.17617062421  |
| NM_003418    | CNBP    | 1019 | 1106 | 2.43920479412  |
| NM_003418    | CNBP    | 126  | 306  | 4.31367414796  |
| NM_199242    | UNC13D  | 1628 | 1677 | 7.32609773754  |
| NM_018301    | RBM41   | 178  | 237  | 6.773959086    |
| NM_001127197 | ELF4    | 434  | 516  | 10.6004480153  |
| NM_001127197 | ELF4    | 3480 | 3547 | 10.5964304151  |
| NM_001127197 | ELF4    | 669  | 729  | 9.01548550703  |
| NM_001127197 | ELF4    | 1366 | 1420 | 10.0153117643  |
| NM_001127197 | ELF4    | 925  | 979  | 10.0114679144  |
| NM_001667    | ARL2    | 257  | 361  | 8.19939395281  |
| NM_001667    | ARL2    | 808  | 868  | 7.19939395258  |
| NM_001667    | ARL2    | 567  | 669  | 7.19939395281  |
| NM_001667    | ARL2    | 869  | 944  | 5.61425770177  |
| NM_001660    | ARF4    | 388  | 483  | 4.62624511491  |
| NM_001660    | ARF4    | 181  | 288  | 5.08567673354  |
| NM_001660    | ARF4    | 802  | 889  | 3.6262451149   |
| NM_001660    | ARF4    | 890  | 1030 | 4.43360003696  |
| NM_001660    | ARF4    | 492  | 671  | 5.08567673354  |
| NM_001127198 | TMC6    | 1324 | 1439 | 7.85847719625  |
| NM_001127198 | TMC6    | 1852 | 1914 | 7.18937548615  |
| NM_001127198 | TMC6    | 2199 | 2255 | 8.27334094521  |
| NM_001127198 | TMC6    | 1521 | 1621 | 8.59544279042  |
| NM_001127198 | TMC6    | 1993 | 2087 | 6.27351469553  |
| NM_001662    | ARF5    | 540  | 591  | 3.72742394172  |
| NM_001662    | ARF5    | 786  | 868  | 3.31238645     |
| NM_001662    | ARF5    | 163  | 281  | 5.31238645     |
| NM_001662    | ARF5    | 625  | 683  | 4.04935204416  |
| NM_001662    | ARF5    | 282  | 519  | 5.97535146272  |
| NM_001662    | ARF5    | 971  | 1071 | 1.72742394927  |
| NM_198043    | ZDHHC16 | 515  | 631  | 8.93615394211  |
| NM_198043    | ZDHHC16 | 158  | 197  | 7.26705223201  |
| NM_198043    | ZDHHC16 | 817  | 861  | 7.35118471034  |
| NM_198043    | ZDHHC16 | 400  | 511  | 7.93615394211  |
| NM_001242783 | TRIM26  | 295  | 361  | 6.93729283594  |

|              |        |      |      |               |
|--------------|--------|------|------|---------------|
| NM_001242783 | TRIM26 | 390  | 450  | 8.94131043611 |
| NM_001242783 | TRIM26 | 215  | 283  | 8.52627270092 |
| NM_001242783 | TRIM26 | 3127 | 3183 | 7.94130370506 |
| NM_001242783 | TRIM26 | 1056 | 1132 | 6.94131043589 |
| NM_001242783 | TRIM26 | 2380 | 2419 | 6.94131043589 |
| NM_001242783 | TRIM26 | 1544 | 1607 | 8.52609918652 |
| NM_001242783 | TRIM26 | 1952 | 1985 | 6.85717122673 |
| NM_001242783 | TRIM26 | 638  | 707  | 9.263238531   |
| NM_001242783 | TRIM26 | 1277 | 1358 | 8.52627293683 |
| NM_001242783 | TRIM26 | 2153 | 2287 | 7.94131043611 |
| NM_001199111 | MDH1   | 720  | 808  | 6.21305228822 |
| NM_001199111 | MDH1   | 1353 | 1421 | 5.62808978749 |
| NM_001199111 | MDH1   | 231  | 332  | 7.21305228822 |
| NM_001199111 | MDH1   | 832  | 932  | 5.95001788238 |
| NM_001199111 | MDH1   | 333  | 503  | 8.27194597727 |
| NM_001199111 | MDH1   | 679  | 720  | 4.62791603718 |
| NM_001199111 | MDH1   | 933  | 1304 | 8.62808978749 |
| NM_005817    | PLIN3  | 1071 | 1098 | 4.54226593653 |
| NM_005817    | PLIN3  | 1487 | 1557 | 6.86436778173 |
| NM_005817    | PLIN3  | 822  | 955  | 7.3497946089  |
| NM_005817    | PLIN3  | 972  | 1069 | 5.54243968685 |
| NM_005817    | PLIN3  | 1637 | 1721 | 7.3497946089  |
| NM_005817    | PLIN3  | 1566 | 1624 | 5.54243968685 |
| NM_005817    | PLIN3  | 103  | 307  | 7.71236468829 |
| NM_005817    | PLIN3  | 1780 | 1818 | 4.53842208667 |
| NM_005817    | PLIN3  | 724  | 818  | 4.54243968684 |
| NM_005817    | PLIN3  | 1921 | 2052 | 6.86436778173 |
| NM_005817    | PLIN3  | 594  | 688  | 6.12740218757 |
| NM_005817    | PLIN3  | 2127 | 2308 | 8.24287940499 |
| NM_005817    | PLIN3  | 1281 | 1451 | 7.54243968685 |
| NM_005813    | PRKD3  | 630  | 693  | 8.11105501086 |
| NM_005813    | PRKD3  | 876  | 923  | 6.44597090093 |
| NM_005813    | PRKD3  | 3262 | 3296 | 7.52609251014 |
| NM_005819    | STX6   | 1618 | 1701 | 4.67788659621 |
| NM_005819    | STX6   | 1445 | 1495 | 6.26284909694 |
| NM_005819    | STX6   | 578  | 662  | 6.67806011061 |
| NM_005819    | STX6   | 1168 | 1222 | 5.59392113715 |
| NM_005819    | STX6   | 1254 | 1350 | 6.67806034653 |
| NM_139246    | TSTD2  | 2994 | 3061 | 7.99821467433 |
| NM_006354    | TADA3  | 2050 | 2106 | 4.23810565197 |
| NM_006354    | TADA3  | 1825 | 1882 | 4.15396644259 |
| NM_006354    | TADA3  | 857  | 975  | 6.56003374686 |
| NM_006354    | TADA3  | 728  | 807  | 5.23810565175 |
| NM_006354    | TADA3  | 1507 | 1587 | 6.23810564442 |
| NM_139244    | STXBP5 | 7    | 46   | 9.91831028335 |
| NM_139244    | STXBP5 | 381  | 467  | 9.91446643349 |
| NM_006356    | ATP5H  | 212  | 307  | 3.53460303148 |
| NM_006356    | ATP5H  | 128  | 207  | 3.1195655322  |
| NM_006356    | ATP5H  | 354  | 489  | 3.70452803292 |
| NM_139242    | MTFMT  | 2005 | 2050 | 8.16237831826 |

|              |          |      |      |               |               |
|--------------|----------|------|------|---------------|---------------|
| NM_139242    | MTFMT    | 1452 | 1529 | 8.16237832581 |               |
| NM_006353    | HMG4     | 1434 | 1483 | 6.27715677369 |               |
| NM_006353    | HMG4     | 1358 | 1406 | 8.28117437386 |               |
| NM_006353    | HMG4     | 1512 | 1573 | 7.28117436631 |               |
| NM_139241    | FGD4     | 7092 | 7135 | 8.0979215223  |               |
| NM_139241    | FGD4     | 7978 | 8051 | 6.51312604084 |               |
| NM_006358    | SLC25A17 |      | 373  | 450           | 8.39620011397 |
| NM_006358    | SLC25A17 |      | 921  | 965           | 8.39602636388 |
| NM_006358    | SLC25A17 |      | 52   | 141           | 9.39620011419 |
| NM_006358    | SLC25A17 |      | 1014 | 1085          | 7.31206090481 |
| NM_006358    | SLC25A17 |      | 811  | 867           | 8.39218251402 |
| NM_006358    | SLC25A17 |      | 1399 | 1486          | 7.39619987827 |
| NM_006358    | SLC25A17 |      | 712  | 784           | 8.39602636388 |
| NM_006358    | SLC25A17 |      | 1230 | 1283          | 8.97714501474 |
| NM_006358    | SLC25A17 |      | 177  | 265           | 8.39619338314 |
| NM_006358    | SLC25A17 |      | 636  | 688           | 9.39218251402 |
| NM_001127443 | CD36     | 1429 | 1484 | 11.2442982504 |               |
| NM_032374    | APOPT1   | 197  | 287  | 5.44598919594 |               |
| NM_032376    | TMEM101  | 302  | 374  | 8.06265851665 |               |
| NM_032376    | TMEM101  | 853  | 937  | 8.74073042177 |               |
| NM_032376    | TMEM101  | 384  | 448  | 6.73671282159 |               |
| NM_032376    | TMEM101  | 22   | 112  | 8.06265851665 |               |
| NM_032376    | TMEM101  | 177  | 271  | 5.74055667145 |               |
| NM_032376    | TMEM101  | 1425 | 1478 | 5.73671282159 |               |
| NM_032376    | TMEM101  | 685  | 831  | 8.91065542321 |               |
| NM_032376    | TMEM101  | 497  | 680  | 8.91065542321 |               |
| NM_032377    | ELOF1    | 205  | 286  | 8.84975326084 |               |
| NM_032377    | ELOF1    | 402  | 482  | 7.26479076012 |               |
| NM_032373    | PCGF5    | 5868 | 5957 | 4.67948141539 |               |
| NM_032373    | PCGF5    | 3895 | 3965 | 2.67948791052 |               |
| NM_032373    | PCGF5    | 5544 | 5606 | 3.59534893706 |               |
| NM_032373    | PCGF5    | 961  | 1017 | 3.67931439612 |               |
| NM_032373    | PCGF5    | 2104 | 2164 | 2.59534893706 |               |
| NM_032373    | PCGF5    | 350  | 410  | 4.26427689684 |               |
| NM_032373    | PCGF5    | 1154 | 1276 | 4.26445064716 |               |
| NM_032373    | PCGF5    | 1773 | 1816 | 3.59534893706 |               |
| NM_032373    | PCGF5    | 451  | 547  | 5.26445064716 |               |
| NM_032373    | PCGF5    | 3557 | 3624 | 2.59534893706 |               |
| NM_032373    | PCGF5    | 271  | 348  | 5.26445064716 |               |
| NM_001145784 | MEF2BNB  | 890  | 938  | 10.2665140596 |               |
| NM_001199787 | SLC35E2  | 896  | 950  | 7.0242824233  |               |
| NM_001199787 | SLC35E2  | 355  | 442  | 8.10842163268 |               |
| NM_001199787 | SLC35E2  | 1027 | 1128 | 10.2783466341 |               |
| NM_001199787 | SLC35E2  | 1261 | 1389 | 9.43034972757 |               |
| NM_001199787 | SLC35E2  | 1437 | 1538 | 8.10842139677 |               |
| NM_001184741 | FGB      | 1232 | 1317 | 2.86373808313 |               |
| NM_001184741 | FGB      | 1317 | 1390 | 4.00124160688 |               |
| NM_001184741 | FGB      | 1414 | 1500 | 2.12677248896 |               |
| NM_001184741 | FGB      | 1678 | 1764 | 1.54180325719 |               |
| NM_001184741 | FGB      | 0    | 159  | 3.12677248896 |               |

|              |         |      |      |               |
|--------------|---------|------|------|---------------|
| NM_001184741 | FGB     | 236  | 1231 | 7.39979098337 |
| NM_001184740 | CTTN    | 135  | 236  | 6.37410059052 |
| NM_001184740 | CTTN    | 1529 | 1702 | 6.95906309124 |
| NM_001184740 | CTTN    | 1355 | 1461 | 5.05217249563 |
| NM_001184740 | CTTN    | 246  | 762  | 8.44448991841 |
| NM_001184740 | CTTN    | 1850 | 1957 | 5.63713499635 |
| NM_001184740 | CTTN    | 2149 | 2269 | 6.05217249563 |
| NM_001184740 | CTTN    | 768  | 959  | 6.95906309124 |
| NM_001184740 | CTTN    | 965  | 1073 | 6.22209749707 |
| NM_001184740 | CTTN    | 2021 | 2130 | 4.63713499635 |
| NM_001184740 | CTTN    | 30   | 133  | 4.63713499635 |
| NM_001184740 | CTTN    | 1703 | 1843 | 6.05217249563 |
| NM_001184740 | CTTN    | 1102 | 1228 | 3.05217249563 |
| NM_177947    | ARMCX3  | 1508 | 1577 | 9.86183673716 |
| NM_177947    | ARMCX3  | 1137 | 1188 | 10.6691916592 |
| NM_177947    | ARMCX3  | 718  | 765  | 8.86166298684 |
| NM_177947    | ARMCX3  | 964  | 1045 | 10.4467992379 |
| NM_177947    | ARMCX3  | 1194 | 1257 | 9.4427816377  |
| NM_177947    | ARMCX3  | 2610 | 2650 | 7.77769752777 |
| NM_177947    | ARMCX3  | 1782 | 1820 | 8.77769752777 |
| NM_177947    | ARMCX3  | 550  | 714  | 9.44679923788 |
| NM_177947    | ARMCX3  | 1049 | 1084 | 9.36266002849 |
| NM_177947    | ARMCX3  | 845  | 919  | 9.4427816377  |
| NM_014164    | FXDY5   | 214  | 287  | 7.91859005492 |
| NM_014167    | CCDC59  | 814  | 889  | 4.05732509761 |
| NM_014161    | MRPL18  | 474  | 540  | 4.82519915742 |
| NM_014161    | MRPL18  | 571  | 645  | 4.82519892905 |
| NM_014161    | MRPL18  | 112  | 194  | 4.24023642832 |
| NM_014161    | MRPL18  | 220  | 361  | 6.24023666424 |
| NM_014161    | MRPL18  | 378  | 463  | 4.24023666424 |
| NM_001048249 | C5orf43 | 413  | 480  | 4.37657558977 |
| NM_001048249 | C5orf43 | 1275 | 1325 | 3.37255798959 |
| NM_001048249 | C5orf43 | 261  | 317  | 3.37255798959 |
| NM_001048249 | C5orf43 | 630  | 710  | 3.37656885871 |
| NM_001048249 | C5orf43 | 322  | 387  | 3.37657558222 |
| NM_001048249 | C5orf43 | 1028 | 1092 | 3.29243638038 |
| NM_001048249 | C5orf43 | 1404 | 1461 | 3.37640183945 |
| NM_001048249 | C5orf43 | 534  | 601  | 4.37656885871 |
| NM_018669    | WDR4    | 1656 | 1710 | 7.73036778735 |
| NM_018849    | ABCB4   | 1489 | 1529 | 6.7112065122  |
| NM_018849    | ABCB4   | 554  | 604  | 5.71103276189 |
| NM_018849    | ABCB4   | 1633 | 1673 | 7.2961690127  |
| NM_018849    | ABCB4   | 736  | 777  | 5.62706730282 |
| NM_018849    | ABCB4   | 780  | 821  | 5.62706730282 |
| NM_018849    | ABCB4   | 3719 | 3841 | 8.03313460709 |
| NM_018849    | ABCB4   | 2654 | 2766 | 6.71120651198 |
| NM_018849    | ABCB4   | 2968 | 3067 | 8.29616901292 |
| NM_015566    | FAM169A | 5489 | 5528 | 3.1675102686  |
| NM_018660    | ZNF395  | 1982 | 2079 | 4.31337061445 |
| NM_015565    | LTN1    | 1121 | 1151 | 9.35295784265 |

|              |         |      |      |               |               |
|--------------|---------|------|------|---------------|---------------|
| NM_015565    | LTN1    | 3950 | 4047 | 10.3529580786 |               |
| NM_015565    | LTN1    | 478  | 525  | 7.76782182753 |               |
| NM_015565    | LTN1    | 209  | 297  | 7.76798884679 |               |
| NM_015565    | LTN1    | 677  | 745  | 8.68385636846 |               |
| NM_015565    | LTN1    | 7354 | 7431 | 7.76799534193 |               |
| NM_015565    | LTN1    | 2977 | 3026 | 7.76397797768 |               |
| NM_015562    | UBXN7   | 1418 | 1504 | 6.57136552828 |               |
| NM_018840    | C2orf24 |      | 130  | 188           | 7.4312099788  |
| NM_018840    | C2orf24 |      | 69   | 120           | 5.84624074703 |
| NM_018840    | C2orf24 |      | 1047 | 1091          | 6.84624747808 |
| NM_018840    | C2orf24 |      | 268  | 559           | 11.1316496969 |
| NM_018840    | C2orf24 |      | 560  | 850           | 10.8004437885 |
| NM_018840    | C2orf24 |      | 856  | 1035          | 9.84624747808 |
| NM_001040092 | ENPP2   | 2240 | 2337 | 11.3810017394 |               |
| NM_001040092 | ENPP2   | 1607 | 1692 | 10.6033941607 |               |
| NM_001040092 | ENPP2   | 2106 | 2159 | 9.38100150343 |               |
| NM_001040092 | ENPP2   | 1419 | 1466 | 9.38100150343 |               |
| NM_001040092 | ENPP2   | 1745 | 1846 | 10.7960392386 |               |
| NM_001040092 | ENPP2   | 1884 | 1928 | 9.79603900271 |               |
| NM_001040092 | ENPP2   | 494  | 560  | 8.79603923862 |               |
| NM_001040092 | ENPP2   | 2487 | 2535 | 8.79586548831 |               |
| NM_001040092 | ENPP2   | 1209 | 1271 | 9.79603900271 |               |
| NM_001040092 | ENPP2   | 897  | 975  | 9.37698413918 |               |
| NM_001040092 | ENPP2   | 2882 | 2932 | 8.79586548831 |               |
| NM_001040092 | ENPP2   | 133  | 202  | 8.79603923863 |               |
| NM_001040092 | ENPP2   | 2596 | 2656 | 8.79603923108 |               |
| NM_001040092 | ENPP2   | 653  | 687  | 8.71190002925 |               |
| NM_001040092 | ENPP2   | 1532 | 1600 | 9.38100173935 |               |
| NM_001040092 | ENPP2   | 2657 | 2720 | 9.3810017318  |               |
| NM_001040092 | ENPP2   | 978  | 1043 | 8.79603923863 |               |
| NM_001040092 | ENPP2   | 2793 | 2876 | 10.1179673335 |               |
| NM_001040092 | ENPP2   | 1045 | 1199 | 10.1179673335 |               |
| NM_001040092 | ENPP2   | 2351 | 2486 | 10.1179673335 |               |
| NM_001040092 | ENPP2   | 340  | 438  | 9.79603923863 |               |
| NM_001040092 | ENPP2   | 1956 | 2105 | 10.3810017394 |               |
| NM_001040092 | ENPP2   | 213  | 332  | 10.9659642401 |               |
| NM_001142616 | EHBP1   | 901  | 959  | 3.06455521835 |               |
| NM_001142616 | EHBP1   | 2444 | 2510 | 1.47574886777 |               |
| NM_001142616 | EHBP1   | 648  | 705  | 3.4797664604  |               |
| NM_001142616 | EHBP1   | 1178 | 1282 | 4.47976646795 |               |
| NM_001142616 | EHBP1   | 710  | 777  | 1.47975973689 |               |
| NM_001142616 | EHBP1   | 1524 | 1564 | 1.39562725856 |               |
| NM_001142616 | EHBP1   | 4118 | 4167 | 2.47959271763 |               |
| NM_001142616 | EHBP1   | 1926 | 1996 | 3.47976646772 |               |
| NM_001142616 | EHBP1   | 1399 | 1448 | 1.47975973689 |               |
| NM_001142616 | EHBP1   | 333  | 446  | 3.47976646795 |               |
| NM_001142928 | LRR61   | 1610 | 1651 | 8.2142218189  |               |
| NM_001142928 | LRR61   | 1513 | 1557 | 8.21405479964 |               |
| NM_001142928 | LRR61   | 1434 | 1478 | 8.13008934057 |               |
| NM_001142928 | LRR61   | 875  | 958  | 7.21422854973 |               |

|              |          |      |      |               |               |
|--------------|----------|------|------|---------------|---------------|
| NM_001142928 | LRRC61   | 389  | 538  | 10.21422855   |               |
| NM_001142928 | LRRC61   | 283  | 388  | 10.021583472  |               |
| NM_002455    | MTX1     | 1501 | 1543 | 9.24528160934 |               |
| NM_002455    | MTX1     | 696  | 776  | 8.74044071783 |               |
| NM_002455    | MTX1     | 990  | 1111 | 9.32942081872 |               |
| NM_002455    | MTX1     | 857  | 931  | 8.74445831045 |               |
| NM_002453    | MTIF2    | 1071 | 1141 | 4.66179334142 |               |
| NM_002453    | MTIF2    | 402  | 471  | 3.99286538164 |               |
| NM_002453    | MTIF2    | 1180 | 1320 | 5.66196709174 |               |
| NM_002451    | MTAP     | 1386 | 1446 | 6.64379265511 |               |
| NM_002451    | MTAP     | 698  | 816  | 6.64379265511 |               |
| NM_033027    | CSRNP1   | 1008 | 1059 | 8.86293504771 |               |
| NM_138300    | PYG02    | 3052 | 3110 | 10.3532608296 |               |
| NM_138300    | PYG02    | 1278 | 1353 | 10.3532675605 |               |
| NM_001226    | CASP6    | 1185 | 1238 | 6.67414696397 |               |
| NM_001226    | CASP6    | 726  | 757  | 6.67414024046 |               |
| NM_001227    | CASP7    | 1323 | 1385 | 7.80337604328 |               |
| NM_001227    | CASP7    | 528  | 604  | 7.88734150235 |               |
| NM_014780    | CUL7     | 1702 | 1755 | 5.59475046705 |               |
| NM_014780    | CUL7     | 1902 | 1936 | 5.51462885784 |               |
| NM_014780    | CUL7     | 2378 | 2417 | 5.51462885784 |               |
| NM_014780    | CUL7     | 3198 | 3306 | 6.59475046705 |               |
| NM_014780    | CUL7     | 1946 | 2010 | 5.51462885784 |               |
| NM_014780    | CUL7     | 4729 | 4795 | 5.59876783131 |               |
| NM_014780    | CUL7     | 3799 | 3933 | 7.59876806723 |               |
| NM_152713    | STT3A    | 2539 | 2637 | 4.54107736848 |               |
| NM_152713    | STT3A    | 2651 | 2823 | 5.86300546337 |               |
| NM_152713    | STT3A    | 61   | 2528 | 12.5882012806 |               |
| NM_014784    | ARHGEF11 |      | 5131 | 5172          | 7.43759635085 |
| NM_014784    | ARHGEF11 |      | 694  | 777           | 8.43777010117 |
| NM_014784    | ARHGEF11 |      | 3993 | 4061          | 7.35363089179 |
| NM_014784    | ARHGEF11 |      | 4380 | 4442          | 7.35363089179 |
| NM_014784    | ARHGEF11 |      | 1522 | 1561          | 7.35363089179 |
| NM_014784    | ARHGEF11 |      | 5547 | 5682          | 8.43777010117 |
| NM_014784    | ARHGEF11 |      | 4230 | 4280          | 8.43776337012 |
| NM_014784    | ARHGEF11 |      | 6044 | 6145          | 9.43777010117 |
| NM_014784    | ARHGEF11 |      | 3254 | 3292          | 7.43759635085 |
| NM_014784    | ARHGEF11 |      | 4654 | 4750          | 7.43777010117 |
| NM_014784    | ARHGEF11 |      | 4918 | 4973          | 9.01871500172 |
| NM_014784    | ARHGEF11 |      | 1689 | 1808          | 9.02273260189 |
| NM_022132    | MCCC2    | 1202 | 1316 | 6.44488470556 |               |
| NM_022132    | MCCC2    | 240  | 336  | 5.44488469801 |               |
| NM_022132    | MCCC2    | 1322 | 1380 | 6.02582960611 |               |
| NM_022132    | MCCC2    | 880  | 974  | 6.02984697037 |               |
| NM_022130    | GOLPH3   | 968  | 1063 | 5.14906761756 |               |
| NM_022130    | GOLPH3   | 2341 | 2395 | 2.82713952267 |               |
| NM_022130    | GOLPH3   | 831  | 892  | 4.41210201585 |               |
| NM_022130    | GOLPH3   | 1387 | 1459 | 2.82713952267 |               |
| NM_022130    | GOLPH3   | 35   | 62   | 3.74300031329 |               |
| NM_022130    | GOLPH3   | 92   | 172  | 3.82713952267 |               |



|              |        |       |       |               |
|--------------|--------|-------|-------|---------------|
| NM_022130    | GOLPH3 | 2499  | 2545  | 4.41210178748 |
| NM_022130    | GOLPH3 | 2556  | 2613  | 4.41192827308 |
| NM_022130    | GOLPH3 | 773   | 817   | 3.82696577236 |
| NM_022130    | GOLPH3 | 1948  | 2051  | 5.14906761756 |
| NM_022130    | GOLPH3 | 1855  | 1903  | 4.41210201585 |
| NM_022130    | GOLPH3 | 495   | 638   | 6.73403011828 |
| NM_022130    | GOLPH3 | 715   | 770   | 2.82713952267 |
| NM_022130    | GOLPH3 | 1312  | 1369  | 3.82713951512 |
| NM_022130    | GOLPH3 | 1773  | 1852  | 3.82713952267 |
| NM_022130    | GOLPH3 | 404   | 455   | 2.82713952267 |
| NM_022130    | GOLPH3 | 1206  | 1296  | 5.14906761756 |
| NM_022130    | GOLPH3 | 648   | 700   | 3.82713928675 |
| NM_022130    | GOLPH3 | 2119  | 2168  | 3.82713279162 |
| NM_022130    | GOLPH3 | 1066  | 1202  | 5.14906761756 |
| NM_021116    | ADCY1  | 1890  | 1996  | 12.5920257871 |
| NM_021116    | ADCY1  | 4253  | 4305  | 11.922924077  |
| NM_021116    | ADCY1  | 11317 | 11367 | 12.0068895361 |
| NM_021116    | ADCY1  | 4181  | 4236  | 13.3289913813 |
| NM_021116    | ADCY1  | 1341  | 1421  | 12.5920257871 |
| NM_021116    | ADCY1  | 6597  | 6667  | 11.0070565553 |
| NM_021116    | ADCY1  | 1497  | 1557  | 12.0070632864 |
| NM_021116    | ADCY1  | 4664  | 4752  | 11.0030456862 |
| NM_021116    | ADCY1  | 10975 | 11035 | 10.922924077  |
| NM_021116    | ADCY1  | 641   | 693   | 13.0070632864 |
| NM_021116    | ADCY1  | 1204  | 1293  | 13.0070632864 |
| NM_021116    | ADCY1  | 694   | 812   | 13.8144182085 |
| NM_021116    | ADCY1  | 10391 | 10471 | 12.0068895361 |
| NM_021116    | ADCY1  | 4616  | 4659  | 11.922924077  |
| NM_021116    | ADCY1  | 1747  | 1828  | 12.0070632864 |
| NM_021116    | ADCY1  | 8920  | 8980  | 12.0070632864 |
| NM_021116    | ADCY1  | 4889  | 4953  | 11.0070630505 |
| NM_021116    | ADCY1  | 1040  | 1178  | 14.0070632864 |
| NM_021116    | ADCY1  | 5801  | 5898  | 12.5920190561 |
| NM_021116    | ADCY1  | 5395  | 5494  | 12.5920257796 |
| NM_199141    | CARM1  | 2795  | 2860  | 7.10200941372 |
| NM_199141    | CARM1  | 1259  | 1316  | 8.10218315649 |
| NM_199141    | CARM1  | 679   | 736   | 8.42411125893 |
| NM_199141    | CARM1  | 1588  | 1643  | 7.68714566476 |
| NM_199141    | CARM1  | 597   | 661   | 6.10218316404 |
| NM_199141    | CARM1  | 415   | 514   | 7.10218316404 |
| NM_199141    | CARM1  | 1123  | 1184  | 7.68714542884 |
| NM_005108    | XYLB   | 712   | 773   | 6.29821838923 |
| NM_005101    | ISG15  | 107   | 205   | 5.64830650259 |
| NM_001195000 | MR1    | 338   | 411   | 9.06446152841 |
| NM_001195000 | MR1    | 838   | 867   | 7.47548143507 |
| NM_001195000 | MR1    | 139   | 259   | 9.47949903524 |
| NM_001195001 | PTPRU  | 5302  | 5375  | 9.65781521161 |
| NM_001195001 | PTPRU  | 5049  | 5108  | 8.07302622529 |
| NM_001195001 | PTPRU  | 3356  | 3470  | 10.0730264612 |
| NM_001195001 | PTPRU  | 3898  | 3957  | 8.07285271089 |

|              |        |      |      |               |
|--------------|--------|------|------|---------------|
| NM_005105    | RBM8A  | 681  | 760  | 4.60264366925 |
| NM_005105    | RBM8A  | 483  | 580  | 4.60264366925 |
| NM_005105    | RBM8A  | 85   | 155  | 3.86567807508 |
| NM_005105    | RBM8A  | 1060 | 1106 | 2.28054182404 |
| NM_005105    | RBM8A  | 186  | 236  | 2.27669797419 |
| NM_005105    | RBM8A  | 267  | 357  | 4.28071557436 |
| NM_005104    | BRD2   | 4622 | 4678 | 3.76446723147 |
| NM_005104    | BRD2   | 1665 | 1724 | 3.68032802208 |
| NM_005104    | BRD2   | 2428 | 2482 | 4.76446723147 |
| NM_005104    | BRD2   | 3261 | 3342 | 3.76446723124 |
| NM_005104    | BRD2   | 2681 | 2734 | 3.76446723147 |
| NM_005104    | BRD2   | 4042 | 4114 | 4.76429348115 |
| NM_005104    | BRD2   | 1362 | 1415 | 5.34942972464 |
| NM_005104    | BRD2   | 2341 | 2428 | 6.08639532635 |
| NM_005104    | BRD2   | 725  | 837  | 6.08639532635 |
| NM_005104    | BRD2   | 2060 | 2126 | 4.76446699555 |
| NM_005104    | BRD2   | 2865 | 3000 | 5.76446723147 |
| NM_005104    | BRD2   | 3777 | 3900 | 4.76446723147 |
| NM_005104    | BRD2   | 4537 | 4619 | 4.76446722392 |
| NM_005104    | BRD2   | 4234 | 4304 | 4.76044963129 |
| NM_001204183 | NEK2   | 468  | 535  | 7.10310463543 |
| NM_001204183 | NEK2   | 125  | 190  | 6.68806713593 |
| NM_001204183 | NEK2   | 413  | 443  | 5.09908703526 |
| NM_001204183 | NEK2   | 835  | 901  | 7.68806713593 |
| NM_001204183 | NEK2   | 204  | 301  | 7.42503273032 |
| NM_001204183 | NEK2   | 1174 | 1258 | 6.6880604051  |
| NM_001204183 | NEK2   | 319  | 403  | 6.10310463543 |
| NM_170713    | RASSF1 | 1325 | 1381 | 7.7963049634  |
| NM_170713    | RASSF1 | 797  | 841  | 6.20733159356 |
| NM_012255    | XRN2   | 998  | 1064 | 4.62489143222 |
| NM_012255    | XRN2   | 3061 | 3110 | 6.20985393316 |
| NM_012255    | XRN2   | 1137 | 1186 | 4.62087383227 |
| NM_012255    | XRN2   | 3167 | 3208 | 4.62087383227 |
| NM_012255    | XRN2   | 1583 | 1644 | 4.62471768212 |
| NM_012255    | XRN2   | 2290 | 2334 | 4.62087383227 |
| NM_012255    | XRN2   | 2610 | 2664 | 3.62471768212 |
| NM_012255    | XRN2   | 1531 | 1569 | 3.54075222306 |
| NM_012255    | XRN2   | 1303 | 1375 | 3.62489119652 |
| NM_012255    | XRN2   | 1933 | 2000 | 5.20985369724 |
| NM_012255    | XRN2   | 1647 | 1781 | 5.20985393316 |
| NM_012255    | XRN2   | 3242 | 3304 | 3.54075222306 |
| NM_012255    | XRN2   | 564  | 661  | 5.20985393316 |
| NM_001950    | E2F4   | 1095 | 1165 | 4.2665801078  |
| NM_001950    | E2F4   | 1243 | 1344 | 7.26675385812 |
| NM_001950    | E2F4   | 345  | 419  | 5.26675385812 |
| NM_001950    | E2F4   | 868  | 922  | 5.84769875867 |
| NM_001483    | GBAS   | 1060 | 1131 | 4.88813882186 |
| NM_001483    | GBAS   | 1825 | 1871 | 5.88813882186 |
| NM_001483    | GBAS   | 1534 | 1589 | 6.55706678165 |
| NM_001483    | GBAS   | 1654 | 1713 | 6.55724052442 |

|              |          |      |      |                   |
|--------------|----------|------|------|-------------------|
| NM_001483    | GBAS     | 855  | 913  | 4.96826043107     |
| NM_001483    | GBAS     | 548  | 620  | 5.9722780237      |
| NM_004477    | FRG1     | 886  | 935  | 4.19665148315     |
| NM_004477    | FRG1     | 521  | 591  | 4.20066235227     |
| NM_004475    | FLOT2    | 1215 | 1293 | 5.37580363473     |
| NM_004475    | FLOT2    | 247  | 332  | 3.79084114134     |
| NM_004475    | FLOT2    | 1296 | 1394 | 5.37580364228     |
| NM_004475    | FLOT2    | 1465 | 1605 | 6.79084114156     |
| NM_004475    | FLOT2    | 70   | 119  | 4.70670193218     |
| NM_004475    | FLOT2    | 466  | 526  | 4.79083441051     |
| NM_004475    | FLOT2    | 339  | 464  | 5.79084114156     |
| NM_004475    | FLOT2    | 148  | 238  | 4.79084114156     |
| NM_004475    | FLOT2    | 1848 | 1892 | 3.70670193218     |
| NM_004475    | FLOT2    | 2257 | 2358 | 5.79084114156     |
| NM_004475    | FLOT2    | 2136 | 2256 | 5.37580364228     |
| NM_004475    | FLOT2    | 2519 | 2592 | 5.79084114156     |
| NM_004475    | FLOT2    | 552  | 687  | 7.2502727602      |
| NM_004475    | FLOT2    | 1608 | 1824 | 7.960766143       |
| NM_001958    | EEF1A2   | 1078 | 1136 | 9.63160063698     |
| NM_001958    | EEF1A2   | 326  | 391  | 9.63561823716     |
| NM_001958    | EEF1A2   | 486  | 585  | 10.6356182372     |
| NM_001958    | EEF1A2   | 596  | 734  | 10.957546332      |
| NM_001958    | EEF1A2   | 1245 | 1330 | 8.63561823716     |
| NM_001958    | EEF1A2   | 1396 | 1536 | 9.63561823716     |
| NM_001959    | EEF1B2   | 92   | 130  | -0.928561570284   |
| NM_001959    | EEF1B2   | 427  | 472  | 1.47750573399     |
| NM_001959    | EEF1B2   | 289  | 427  | 2.1555776391      |
| NM_001959    | EEF1B2   | 535  | 1081 | 4.74054013982     |
| NM_001044305 | SMAP1    | 464  | 551  | 5.18237736017     |
| NM_001044305 | SMAP1    | 1688 | 1739 | 5.68721825168     |
| NM_001044305 | SMAP1    | 1769 | 1811 | 4.18622121002     |
| NM_001044305 | SMAP1    | 938  | 1030 | 5.18638822928     |
| NM_005788    | PRMT3    | 1081 | 1127 | 5.87444391397     |
| NM_005788    | PRMT3    | 608  | 660  | 6.95456552318     |
| NM_005788    | PRMT3    | 1206 | 1256 | 7.54337187376     |
| NM_133462    | TTC14    | 498  | 589  | 6.65530798522     |
| NM_133462    | TTC14    | 2728 | 2796 | 6.24027048572     |
| NM_133462    | TTC14    | 2641 | 2716 | 6.9772360801      |
| NM_133462    | TTC14    | 1032 | 1120 | 7.9772360801      |
| NM_133462    | TTC14    | 870  | 943  | 6.97722934905     |
| NM_133462    | TTC14    | 2503 | 2558 | 4.65530125416     |
| NM_133462    | TTC14    | 1346 | 1392 | 6.65530125416     |
| NM_133462    | TTC14    | 1131 | 1273 | 6.24027048594     |
| NM_133462    | TTC14    | 1590 | 1665 | 5.65129038504     |
| NM_133462    | TTC14    | 669  | 769  | 7.65530798522     |
| NM_133465    | KIAA1958 |      | 804  | 855 7.03130142782 |
| NM_182746    | MCM4     | 2845 | 2924 | 4.91144131764     |
| NM_182746    | MCM4     | 3485 | 3546 | 5.49640381836     |
| NM_182746    | MCM4     | 791  | 882  | 3.91144131764     |
| NM_182746    | MCM4     | 2745 | 2844 | 6.23336941253     |

|           |       |       |       |               |
|-----------|-------|-------|-------|---------------|
| NM_182746 | MCM4  | 3290  | 3428  | 8.23336941253 |
| NM_182746 | MCM4  | 3556  | 3591  | 3.91143458659 |
| NM_182746 | MCM4  | 4204  | 4252  | 5.41226460898 |
| NM_182746 | MCM4  | 1441  | 1480  | 5.49640381836 |
| NM_182746 | MCM4  | 1483  | 1692  | 8.30375874042 |
| NM_182746 | MCM4  | 2211  | 2371  | 7.23336941253 |
| NM_182746 | MCM4  | 4453  | 4524  | 3.91144131764 |
| NM_182746 | MCM4  | 1827  | 1912  | 4.91144131764 |
| NM_182746 | MCM4  | 1260  | 1431  | 7.61188103578 |
| NM_182746 | MCM4  | 926   | 1036  | 4.91144131764 |
| NM_182746 | MCM4  | 2942  | 3290  | 7.23336941253 |
| NM_182746 | MCM4  | 1052  | 1260  | 6.7187962397  |
| NM_182746 | MCM4  | 2427  | 2741  | 8.15936883108 |
| NM_182746 | MCM4  | 1929  | 2198  | 8.30375874042 |
| NM_006904 | PRKDC | 7105  | 7156  | 6.45980816713 |
| NM_006904 | PRKDC | 13032 | 13076 | 5.45980816713 |
| NM_006904 | PRKDC | 6757  | 6810  | 8.04477739891 |
| NM_006904 | PRKDC | 9395  | 9469  | 7.45981489818 |
| NM_006904 | PRKDC | 8727  | 8817  | 7.78173626202 |
| NM_006904 | PRKDC | 7961  | 8049  | 7.04477739891 |
| NM_006904 | PRKDC | 4212  | 4280  | 8.04477739891 |
| NM_006904 | PRKDC | 8221  | 8279  | 7.45981489818 |
| NM_006904 | PRKDC | 9108  | 9153  | 5.45579729801 |
| NM_006904 | PRKDC | 2827  | 2889  | 7.04477739891 |
| NM_006904 | PRKDC | 5156  | 5223  | 7.45981489818 |
| NM_006904 | PRKDC | 1608  | 1682  | 8.91924651682 |
| NM_006904 | PRKDC | 8565  | 8604  | 6.45964114787 |
| NM_006904 | PRKDC | 5878  | 5954  | 8.26716982024 |
| NM_006904 | PRKDC | 7237  | 7297  | 6.45981489064 |
| NM_006904 | PRKDC | 10256 | 10321 | 7.45981489818 |
| NM_006904 | PRKDC | 5981  | 6051  | 8.45981489818 |
| NM_006904 | PRKDC | 4701  | 4815  | 8.78174299307 |
| NM_006904 | PRKDC | 3083  | 3193  | 8.45981489818 |
| NM_006904 | PRKDC | 10547 | 10614 | 6.45964114787 |
| NM_006904 | PRKDC | 5508  | 5592  | 8.26716982024 |
| NM_006904 | PRKDC | 11203 | 11253 | 5.45964114787 |
| NM_006904 | PRKDC | 7460  | 7501  | 5.45964114787 |
| NM_006904 | PRKDC | 4535  | 4701  | 9.26716982024 |
| NM_006904 | PRKDC | 8482  | 8563  | 6.45981489818 |
| NM_006904 | PRKDC | 9502  | 9557  | 6.45981489818 |
| NM_006904 | PRKDC | 12113 | 12166 | 7.04477066785 |
| NM_006904 | PRKDC | 7172  | 7233  | 7.78174299307 |
| NM_006904 | PRKDC | 6068  | 6180  | 7.78174299307 |
| NM_006904 | PRKDC | 10321 | 10384 | 5.3756756888  |
| NM_006904 | PRKDC | 156   | 205   | 6.3756756888  |
| NM_006904 | PRKDC | 12496 | 12552 | 6.3756756888  |
| NM_006904 | PRKDC | 10792 | 10858 | 7.78174299307 |
| NM_006904 | PRKDC | 10937 | 11022 | 6.45981489818 |
| NM_006904 | PRKDC | 11028 | 11183 | 8.45981489818 |
| NM_006904 | PRKDC | 7298  | 7447  | 9.16025461633 |

|           |       |       |       |               |
|-----------|-------|-------|-------|---------------|
| NM_006904 | PRKDC | 1060  | 1086  | 6.3756756888  |
| NM_006904 | PRKDC | 8820  | 8923  | 8.04477739891 |
| NM_006904 | PRKDC | 6203  | 6371  | 8.62973989963 |
| NM_006904 | PRKDC | 6444  | 6532  | 8.26716982024 |
| NM_006904 | PRKDC | 5050  | 5155  | 7.78174299307 |
| NM_006904 | PRKDC | 6982  | 7091  | 8.04477739891 |
| NM_006904 | PRKDC | 4057  | 4205  | 8.04477739891 |
| NM_006904 | PRKDC | 3536  | 3709  | 9.54727773944 |
| NM_006904 | PRKDC | 12234 | 12325 | 7.04477739891 |
| NM_006904 | PRKDC | 5239  | 5483  | 9.45981489818 |
| NM_006904 | PRKDC | 9921  | 10201 | 9.70774241163 |
| NM_006904 | PRKDC | 3818  | 3944  | 6.45981489818 |
| NM_006904 | PRKDC | 3332  | 3421  | 6.45981489818 |
| NM_006904 | PRKDC | 5635  | 5844  | 8.62973989963 |
| NM_006904 | PRKDC | 1468  | 1520  | 7.0447773989  |
| NM_006904 | PRKDC | 8317  | 8416  | 7.04477739891 |
| NM_006904 | PRKDC | 231   | 392   | 8.04477739891 |
| NM_006904 | PRKDC | 1098  | 1344  | 9.26716982024 |
| NM_006904 | PRKDC | 4359  | 4532  | 8.04477739891 |
| NM_006904 | PRKDC | 7505  | 7708  | 9.26716982024 |
| NM_006904 | PRKDC | 10388 | 10541 | 7.78174299307 |
| NM_006904 | PRKDC | 6609  | 6671  | 7.04477739136 |
| NM_006904 | PRKDC | 1703  | 2013  | 9.85213232096 |
| NM_006904 | PRKDC | 12833 | 13001 | 6.45981489818 |
| NM_006904 | PRKDC | 9206  | 9327  | 7.45981489818 |
| NM_006904 | PRKDC | 11754 | 11967 | 9.16025461633 |
| NM_006904 | PRKDC | 2933  | 3072  | 8.91924651682 |
| NM_006904 | PRKDC | 10690 | 10767 | 6.45981489818 |
| NM_006904 | PRKDC | 4855  | 4996  | 8.45981489818 |
| NM_006904 | PRKDC | 2208  | 2798  | 10.2671698202 |
| NM_006904 | PRKDC | 8604  | 8695  | 7.04477739891 |
| NM_006904 | PRKDC | 11419 | 11646 | 9.26716982024 |
| NM_006904 | PRKDC | 7736  | 7887  | 9.62973989963 |
| NM_006904 | PRKDC | 8942  | 9106  | 8.04477739891 |
| NM_006904 | PRKDC | 9768  | 9893  | 8.45981489818 |
| NM_006904 | PRKDC | 802   | 1000  | 8.91924651682 |
| NM_006907 | PYCR1 | 1911  | 1998  | 5.19220794202 |
| NM_006907 | PYCR1 | 425   | 473   | 6.19220793447 |
| NM_006907 | PYCR1 | 169   | 190   | 5.10806873264 |
| NM_006907 | PYCR1 | 1615  | 1702  | 6.77717044275 |
| NM_006907 | PYCR1 | 1729  | 1782  | 5.10806873264 |
| NM_006907 | PYCR1 | 1293  | 1361  | 5.19220793447 |
| NM_006907 | PYCR1 | 1545  | 1579  | 5.18819034185 |
| NM_006908 | RAC1  | 1574  | 1674  | 6.02128652335 |
| NM_006908 | RAC1  | 1718  | 1907  | 8.39052033302 |
| NM_006908 | RAC1  | 1975  | 2339  | 9.0801802124  |
| NM_006908 | RAC1  | 1074  | 1327  | 8.24367894469 |
| NM_006908 | RAC1  | 237   | 891   | 10.256502985  |
| NM_006908 | RAC1  | 900   | 1051  | 6.89575564127 |
| NM_006908 | RAC1  | 160   | 234   | 3.43230642246 |

|              |         |       |       |               |
|--------------|---------|-------|-------|---------------|
| NM_006908    | RAC1    | 1328  | 1562  | 8.52378686388 |
| NM_006908    | RAC1    | 27    | 123   | 4.43632402263 |
| NM_001137675 | ATXN1L  | 4814  | 4871  | 8.13402253441 |
| NM_001137675 | ATXN1L  | 3361  | 3424  | 8.13402253441 |
| NM_030943    | AMN     | 77    | 165   | 9.05162186109 |
| NM_030943    | AMN     | 775   | 814   | 8.05144811077 |
| NM_030943    | AMN     | 281   | 399   | 8.05162186109 |
| NM_003887    | ASAP2   | 1528  | 1653  | 6.79039649253 |
| NM_003883    | HDAC3   | 1161  | 1280  | 5.53143159954 |
| NM_003883    | HDAC3   | 1670  | 1745  | 6.11622034995 |
| NM_003883    | HDAC3   | 238   | 298   | 5.44729239016 |
| NM_003883    | HDAC3   | 375   | 467   | 5.53142486849 |
| NM_003883    | HDAC3   | 1334  | 1428  | 4.53143136363 |
| NM_020247    | ADCK3   | 1553  | 1608  | 5.84808358209 |
| NM_020247    | ADCK3   | 1288  | 1352  | 4.25910348119 |
| NM_020247    | ADCK3   | 1938  | 1984  | 4.25910348119 |
| NM_020247    | ADCK3   | 1430  | 1495  | 5.26312108137 |
| NM_020247    | ADCK3   | 422   | 472   | 4.26312084545 |
| NM_020247    | ADCK3   | 1867  | 1929  | 4.26294733105 |
| NM_020247    | ADCK3   | 1358  | 1419  | 5.25910348119 |
| NM_020247    | ADCK3   | 2437  | 2565  | 7.26312108137 |
| NM_020247    | ADCK3   | 1052  | 1158  | 5.26312108137 |
| NM_020247    | ADCK3   | 298   | 399   | 4.26312108137 |
| NM_020247    | ADCK3   | 1667  | 1803  | 7.07047600342 |
| NM_020247    | ADCK3   | 2278  | 2394  | 6.26312108137 |
| NM_020246    | SLC12A9 | 3164  | 3231  | 10.0415402047 |
| NM_020246    | SLC12A9 | 502   | 610   | 10.0415402047 |
| NM_020246    | SLC12A9 | 3231  | 3297  | 10.4565777039 |
| NM_020246    | SLC12A9 | 1991  | 2029  | 8.45256010377 |
| NM_020246    | SLC12A9 | 2808  | 2863  | 9.45657770394 |
| NM_020246    | SLC12A9 | 2219  | 2268  | 8.45657770372 |
| NM_020246    | SLC12A9 | 2296  | 2372  | 8.45657769639 |
| NM_020246    | SLC12A9 | 313   | 365   | 9.45657770394 |
| NM_020246    | SLC12A9 | 1699  | 1777  | 10.4565777039 |
| NM_020246    | SLC12A9 | 403   | 432   | 8.37243849455 |
| NM_020246    | SLC12A9 | 121   | 168   | 9.45657770372 |
| NM_020246    | SLC12A9 | 736   | 845   | 11.7785057988 |
| NM_020246    | SLC12A9 | 873   | 1191  | 12.6265027054 |
| NM_020246    | SLC12A9 | 2076  | 2161  | 9.45657770394 |
| NM_020246    | SLC12A9 | 630   | 717   | 10.4565777039 |
| NM_020246    | SLC12A9 | 1354  | 1532  | 12.0415402047 |
| NM_020245    | TULP4   | 10852 | 10910 | 8.79389439266 |
| NM_020245    | TULP4   | 6170  | 6211  | 10.1158224873 |
| NM_020245    | TULP4   | 1846  | 1913  | 9.79389438511 |
| NM_020245    | TULP4   | 690   | 741   | 7.78987679249 |
| NM_020245    | TULP4   | 1999  | 2059  | 7.79388766161 |
| NM_020245    | TULP4   | 624   | 676   | 9.37868314307 |
| NM_020245    | TULP4   | 5857  | 5900  | 9.37483929321 |
| NM_020245    | TULP4   | 114   | 173   | 7.78987679249 |
| NM_020245    | TULP4   | 1639  | 1716  | 8.79389439266 |

|           |          |       |       |               |               |
|-----------|----------|-------|-------|---------------|---------------|
| NM_020245 | TULP4    | 6525  | 6579  | 7.70975518328 |               |
| NM_020245 | TULP4    | 1747  | 1837  | 9.37885016233 |               |
| NM_020245 | TULP4    | 10278 | 10468 | 10.1158224876 |               |
| NM_020245 | TULP4    | 8384  | 8438  | 7.79372064235 |               |
| NM_020245 | TULP4    | 3254  | 3331  | 9.79389415674 |               |
| NM_020245 | TULP4    | 834   | 909   | 10.3788568934 |               |
| NM_020245 | TULP4    | 10484 | 10600 | 9.79389439266 |               |
| NM_020245 | TULP4    | 6581  | 6682  | 8.79389439266 |               |
| NM_020244 | CHPT1    | 412   | 481   | 5.44637696507 |               |
| NM_020244 | CHPT1    | 714   | 895   | 9.35326756068 |               |
| NM_020244 | CHPT1    | 1230  | 1347  | 8.25373188713 |               |
| NM_020244 | CHPT1    | 1008  | 1210  | 9.03133946579 |               |
| NM_020244 | CHPT1    | 1357  | 1504  | 8.61630196651 |               |
| NM_020244 | CHPT1    | 519   | 713   | 9.53383980632 |               |
| NM_020244 | CHPT1    | 902   | 989   | 8.25373188713 |               |
| NM_020791 | TAOK1    | 3798  | 3835  | 6.83676778057 |               |
| NM_020791 | TAOK1    | 9757  | 9809  | 5.83659403025 |               |
| NM_020791 | TAOK1    | 3997  | 4048  | 6.3375910719  |               |
| NM_020791 | TAOK1    | 4500  | 4556  | 6.41771268112 |               |
| NM_020791 | TAOK1    | 497   | 550   | 5.83275018039 |               |
| NM_020791 | TAOK1    | 9389  | 9435  | 6.41771268112 |               |
| NM_020791 | TAOK1    | 82    | 125   | 5.83676754465 |               |
| NM_020791 | TAOK1    | 4421  | 4465  | 6.3375910719  |               |
| NM_020791 | TAOK1    | 7678  | 7731  | 4.75262857118 |               |
| NM_020791 | TAOK1    | 8869  | 8915  | 5.75262857118 |               |
| NM_020791 | TAOK1    | 10327 | 10475 | 6.83676778057 |               |
| NM_020791 | TAOK1    | 2780  | 2849  | 4.83676777302 |               |
| NM_020791 | TAOK1    | 10961 | 11045 | 5.83676778056 |               |
| NM_020791 | TAOK1    | 8213  | 8317  | 7.64412269508 |               |
| NM_020240 | CDC42SE2 |       | 2205  | 2260          | 8.34218259289 |
| NM_020240 | CDC42SE2 |       | 3212  | 3258          | 8.42614805196 |
| NM_020240 | CDC42SE2 |       | 906   | 974           | 8.42632180227 |
| NM_020240 | CDC42SE2 |       | 500   | 564           | 8.4223042021  |
| NM_020240 | CDC42SE2 |       | 267   | 305           | 7.75722009217 |
| NM_020240 | CDC42SE2 |       | 567   | 652           | 9.42632180227 |
| NM_020240 | CDC42SE2 |       | 1606  | 1658          | 8.34218259289 |
| NM_020240 | CDC42SE2 |       | 1469  | 1528          | 6.83734170138 |
| NM_020240 | CDC42SE2 |       | 352   | 491           | 8.84135930155 |
| NM_020240 | CDC42SE2 |       | 170   | 251           | 8.84135930155 |
| NM_004218 | RAB11B   | 530   | 574   | 6.43578631959 |               |
| NM_004218 | RAB11B   | 1435  | 1487  | 6.43577958876 |               |
| NM_004218 | RAB11B   | 1323  | 1432  | 7.43578631982 |               |
| NM_004218 | RAB11B   | 366   | 426   | 6.4357860839  |               |
| NM_004218 | RAB11B   | 267   | 323   | 5.85082358318 |               |
| NM_004218 | RAB11B   | 806   | 888   | 6.4357860839  |               |
| NM_004218 | RAB11B   | 88    | 170   | 7.65817874115 |               |
| NM_004218 | RAB11B   | 172   | 240   | 6.43578631227 |               |
| NM_004218 | RAB11B   | 1521  | 1624  | 6.43578631982 |               |
| NM_004219 | PTTG1    | 437   | 521   | 8.1446573083  |               |
| NM_004219 | PTTG1    | 263   | 359   | 6.33730238624 |               |

|           |        |      |      |               |
|-----------|--------|------|------|---------------|
| NM_004219 | PTTG1  | 360  | 427  | 7.65923048113 |
| NM_004219 | PTTG1  | 88   | 256  | 8.50722738768 |
| NM_004219 | PTTG1  | 615  | 731  | 7.33730238624 |
| NM_138807 | TAMM41 | 292  | 336  | 7.55069461744 |
| NM_032810 | ATAD1  | 1263 | 1317 | 6.32255139335 |
| NM_032810 | ATAD1  | 594  | 655  | 6.32255139335 |
| NM_032810 | ATAD1  | 1073 | 1137 | 5.51519647129 |
| NM_032810 | ATAD1  | 2573 | 2607 | 3.51117887112 |
| NM_032810 | ATAD1  | 929  | 1005 | 6.51519647129 |
| NM_032810 | ATAD1  | 2099 | 2156 | 4.51518974024 |
| NM_032810 | ATAD1  | 1010 | 1071 | 5.83712456618 |
| NM_032810 | ATAD1  | 818  | 929  | 6.10015897201 |
| NM_032810 | ATAD1  | 1199 | 1262 | 5.51519647129 |
| NM_032810 | ATAD1  | 1352 | 1549 | 6.68512147273 |
| NM_032810 | ATAD1  | 375  | 593  | 7.60265931254 |
| NM_032810 | ATAD1  | 1560 | 1644 | 5.10015897201 |
| NM_032810 | ATAD1  | 655  | 804  | 6.51519647129 |
| NM_032813 | TMTC4  | 826  | 932  | 8.04723183888 |
| NM_032813 | TMTC4  | 2173 | 2236 | 7.04705808857 |
| NM_032813 | TMTC4  | 1205 | 1266 | 8.04723183133 |
| NM_032813 | TMTC4  | 646  | 672  | 7.04321423871 |
| NM_032813 | TMTC4  | 1420 | 1491 | 9.6321943396  |
| NM_032813 | TMTC4  | 1687 | 1767 | 9.04723183888 |
| NM_032813 | TMTC4  | 321  | 393  | 7.04705808857 |
| NM_032813 | TMTC4  | 944  | 1015 | 8.04723183888 |
| NM_032813 | TMTC4  | 2523 | 2601 | 7.04722510783 |
| NM_032813 | TMTC4  | 1522 | 1598 | 9.36915969785 |
| NM_032813 | TMTC4  | 1837 | 1905 | 8.04723160297 |
| NM_032813 | TMTC4  | 453  | 634  | 10.3691599338 |
| NM_000687 | AHCY   | 1300 | 1375 | 2.54558766791 |
| NM_000687 | AHCY   | 66   | 112  | 3.54558766769 |
| NM_000687 | AHCY   | 1643 | 1701 | 2.54558743199 |
| NM_000687 | AHCY   | 1394 | 1469 | 3.54558766791 |
| NM_000687 | AHCY   | 1182 | 1286 | 4.54558766791 |
| NM_000687 | AHCY   | 730  | 841  | 5.13055016863 |
| NM_000687 | AHCY   | 1519 | 1606 | 4.8675157628  |
| NM_000687 | AHCY   | 373  | 562  | 6.35294258997 |
| NM_000687 | AHCY   | 858  | 1143 | 6.79351518135 |
| NM_000687 | AHCY   | 1762 | 1858 | 4.8675157628  |
| NM_000687 | AHCY   | 1861 | 2046 | 5.13055016863 |
| NM_000687 | AHCY   | 144  | 344  | 5.8675157628  |
| NM_000687 | AHCY   | 562  | 721  | 5.35294258997 |
| NM_198549 | FAM73A | 1528 | 1576 | 8.17068071178 |
| NM_198549 | FAM73A | 417  | 512  | 8.75564994333 |
| NM_198549 | FAM73A | 3405 | 3450 | 8.16666984266 |
| NM_198549 | FAM73A | 189  | 226  | 9.17051369251 |
| NM_198549 | FAM73A | 1110 | 1179 | 8.17068743528 |
| NM_198549 | FAM73A | 785  | 860  | 7.17051369251 |
| NM_198549 | FAM73A | 924  | 1013 | 9.97804236489 |
| NM_198549 | FAM73A | 668  | 728  | 9.17068743528 |



|           |         |      |      |               |
|-----------|---------|------|------|---------------|
| NM_198549 | FAM73A  | 1353 | 1480 | 9.49261553772 |
| NM_198549 | FAM73A  | 275  | 370  | 8.17068744283 |
| NM_000683 | ADRA2C  | 640  | 733  | 10.9246841367 |
| NM_000683 | ADRA2C  | 1770 | 1810 | 7.92468413669 |
| NM_000683 | ADRA2C  | 549  | 611  | 7.92468413647 |
| NM_000683 | ADRA2C  | 1665 | 1758 | 9.92468413669 |
| NM_000683 | ADRA2C  | 1173 | 1264 | 10.7320390587 |
| NM_000683 | ADRA2C  | 290  | 331  | 8.92066653652 |
| NM_000683 | ADRA2C  | 1280 | 1380 | 10.9246841367 |
| NM_000683 | ADRA2C  | 169  | 287  | 10.5096466374 |
| NM_000683 | ADRA2C  | 1382 | 1502 | 8.92468413669 |
| NM_000683 | ADRA2C  | 331  | 540  | 11.9246841367 |
| NM_025149 | ACSF2   | 285  | 349  | 4.1474390221  |
| NM_025147 | COQ10B  | 564  | 630  | 8.87996058717 |
| NM_025146 | NAA50   | 669  | 785  | 5.98098830406 |
| NM_025146 | NAA50   | 2110 | 2173 | 4.56595080478 |
| NM_025146 | NAA50   | 2408 | 2461 | 2.98098806814 |
| NM_025146 | NAA50   | 147  | 194  | 3.98081455374 |
| NM_025146 | NAA50   | 416  | 456  | 3.98081455374 |
| NM_025146 | NAA50   | 1731 | 1813 | 2.98098157301 |
| NM_025146 | NAA50   | 3441 | 3493 | 2.97697070389 |
| NM_025146 | NAA50   | 464  | 594  | 5.30291639895 |
| NM_025146 | NAA50   | 2894 | 3008 | 5.78834322612 |
| NM_025146 | NAA50   | 2048 | 2101 | 4.98098157301 |
| NM_025146 | NAA50   | 3205 | 3261 | 2.98098157301 |
| NM_025146 | NAA50   | 929  | 1107 | 6.78834322612 |
| NM_025146 | NAA50   | 278  | 376  | 4.56595080478 |
| NM_025146 | NAA50   | 3575 | 3648 | 3.98081455374 |
| NM_025146 | NAA50   | 1305 | 1382 | 4.56595080478 |
| NM_025146 | NAA50   | 1153 | 1297 | 2.98098830406 |
| NM_025146 | NAA50   | 3113 | 3204 | 5.30291639895 |
| NM_025146 | NAA50   | 2804 | 2869 | 2.89684909468 |
| NM_025146 | NAA50   | 1426 | 1603 | 6.4404199227  |
| NM_025146 | NAA50   | 792  | 884  | 4.56595079723 |
| NM_025146 | NAA50   | 1929 | 2001 | 5.30291639895 |
| NM_020424 | LYRM1   | 1274 | 1320 | 7.29821838923 |
| NM_016556 | PSMC3IP | 1388 | 1421 | 5.69263620743 |
| NM_024896 | ERMP1   | 4585 | 4667 | 7.74729997613 |
| NM_024896 | ERMP1   | 1036 | 1109 | 8.74747372645 |
| NM_024896 | ERMP1   | 971  | 1022 | 6.15849362556 |
| NM_024896 | ERMP1   | 4418 | 4477 | 7.74747349053 |
| NM_024896 | ERMP1   | 4167 | 4259 | 6.16251098981 |
| NM_024896 | ERMP1   | 2275 | 2344 | 8.48443932062 |
| NM_024896 | ERMP1   | 3041 | 3127 | 8.16251122573 |
| NM_024896 | ERMP1   | 2858 | 2908 | 6.07837201634 |
| NM_024896 | ERMP1   | 3445 | 3495 | 8.48443932039 |
| NM_024896 | ERMP1   | 1114 | 1163 | 6.16251122573 |
| NM_024896 | ERMP1   | 4298 | 4339 | 7.16233747541 |
| NM_024896 | ERMP1   | 276  | 336  | 7.74747372645 |
| NM_024896 | ERMP1   | 1374 | 1445 | 9.48443932062 |

|           |        |      |      |               |
|-----------|--------|------|------|---------------|
| NM_024896 | ERMP1  | 2920 | 2960 | 7.7474669954  |
| NM_024896 | ERMP1  | 3810 | 3871 | 6.16251122551 |
| NM_024896 | ERMP1  | 501  | 584  | 8.48443932062 |
| NM_024896 | ERMP1  | 3871 | 3969 | 8.16250449467 |
| NM_024896 | ERMP1  | 2003 | 2031 | 6.15849362556 |
| NM_024896 | ERMP1  | 796  | 932  | 8.16251122573 |
| NM_024896 | ERMP1  | 2230 | 2271 | 8.16233747541 |
| NM_024896 | ERMP1  | 1188 | 1230 | 7.16250449467 |
| NM_024896 | ERMP1  | 2364 | 2453 | 9.33243622717 |
| NM_024896 | ERMP1  | 390  | 500  | 8.74747372645 |
| NM_024896 | ERMP1  | 1810 | 1989 | 10.0694018213 |
| NM_024896 | ERMP1  | 2117 | 2225 | 9.16251122573 |
| NM_024896 | ERMP1  | 2523 | 2666 | 8.48443932062 |
| NM_024896 | ERMP1  | 3525 | 3651 | 8.74747372645 |
| NM_024896 | ERMP1  | 1447 | 1774 | 11.3324362272 |
| NM_024896 | ERMP1  | 1254 | 1364 | 8.48443932062 |
| NM_024896 | ERMP1  | 3255 | 3402 | 9.48443932062 |
| NM_024896 | ERMP1  | 2671 | 2820 | 9.48443932062 |
| NM_024894 | NOL10  | 964  | 1035 | 5.30506689421 |
| NM_024894 | NOL10  | 254  | 296  | 4.3048931439  |
| NM_144998 | STRA13 | 323  | 381  | 8.09306845554 |
| NM_203318 | MY018A | 2658 | 2740 | 7.0612968098  |
| NM_203318 | MY018A | 2963 | 3008 | 5.47633430886 |
| NM_203318 | MY018A | 7074 | 7151 | 5.47632757803 |
| NM_203318 | MY018A | 7449 | 7517 | 6.79826240397 |
| NM_203318 | MY018A | 5444 | 5503 | 5.47616055876 |
| NM_203318 | MY018A | 1942 | 1998 | 5.47633430907 |
| NM_203318 | MY018A | 1806 | 1879 | 6.0612968098  |
| NM_203318 | MY018A | 5932 | 5979 | 4.47632757803 |
| NM_203318 | MY018A | 6008 | 6073 | 5.47616055876 |
| NM_203318 | MY018A | 2018 | 2053 | 5.47616055876 |
| NM_203318 | MY018A | 1016 | 1096 | 6.47632757803 |
| NM_203318 | MY018A | 1616 | 1662 | 5.3921950997  |
| NM_203318 | MY018A | 802  | 900  | 4.47616055876 |
| NM_203318 | MY018A | 7185 | 7252 | 5.47633430153 |
| NM_203318 | MY018A | 4545 | 4576 | 4.47633407316 |
| NM_203318 | MY018A | 2255 | 2302 | 4.47231670891 |
| NM_203318 | MY018A | 3362 | 3437 | 6.05727920963 |
| NM_203318 | MY018A | 6811 | 6863 | 4.47633407316 |
| NM_203318 | MY018A | 4493 | 4541 | 4.47616055876 |
| NM_203318 | MY018A | 4020 | 4076 | 4.3921950997  |
| NM_203318 | MY018A | 531  | 585  | 6.06129680225 |
| NM_203318 | MY018A | 5330 | 5441 | 6.47633430908 |
| NM_203318 | MY018A | 2598 | 2658 | 4.47633430907 |
| NM_203318 | MY018A | 1319 | 1436 | 7.47633430908 |
| NM_203318 | MY018A | 1482 | 1575 | 5.47633430908 |
| NM_203318 | MY018A | 5623 | 5694 | 5.47633430908 |
| NM_203318 | MY018A | 4669 | 4778 | 6.79826240397 |
| NM_203318 | MY018A | 1691 | 1796 | 6.79826240397 |
| NM_203318 | MY018A | 973  | 1016 | 4.47616055876 |

|              |         |      |      |               |
|--------------|---------|------|------|---------------|
| NM_203318    | MY018A  | 3777 | 3891 | 4.47633430908 |
| NM_203318    | MY018A  | 3470 | 3669 | 7.64625931052 |
| NM_203318    | MY018A  | 1166 | 1319 | 6.79826240397 |
| NM_203318    | MY018A  | 4214 | 4310 | 4.47633430908 |
| NM_203318    | MY018A  | 6143 | 6227 | 5.47633430907 |
| NM_203318    | MY018A  | 6343 | 6419 | 5.47633430153 |
| NM_203318    | MY018A  | 3179 | 3309 | 4.47633430908 |
| NM_203318    | MY018A  | 4088 | 4182 | 5.47633430886 |
| NM_203318    | MY018A  | 2386 | 2555 | 7.47633430908 |
| NM_203318    | MY018A  | 228  | 408  | 6.79826240397 |
| NM_203318    | MY018A  | 6477 | 6556 | 4.47633430907 |
| NM_175841    | SMOX    | 367  | 425  | 7.35340911908 |
| NM_175841    | SMOX    | 196  | 277  | 8.35358263348 |
| NM_175841    | SMOX    | 823  | 940  | 7.93854537012 |
| NM_017971    | MRPL20  | 198  | 421  | 9.00995191744 |
| NM_017971    | MRPL20  | 57   | 183  | 7.72984399825 |
| NM_017971    | MRPL20  | 448  | 618  | 8.62292879434 |
| NM_182811    | PLCG1   | 350  | 424  | 5.54174201571 |
| NM_182811    | PLCG1   | 1045 | 1159 | 5.54575961588 |
| NM_182811    | PLCG1   | 1995 | 2045 | 3.87665790577 |
| NM_182811    | PLCG1   | 2675 | 2743 | 3.95677951498 |
| NM_182811    | PLCG1   | 3435 | 3490 | 4.96079710761 |
| NM_182811    | PLCG1   | 1526 | 1596 | 3.95677951498 |
| NM_182811    | PLCG1   | 4724 | 4784 | 3.96079710761 |
| NM_182811    | PLCG1   | 1603 | 1695 | 5.96079711516 |
| NM_182811    | PLCG1   | 2059 | 2117 | 3.96079711494 |
| NM_182811    | PLCG1   | 3503 | 3559 | 4.96079710761 |
| NM_182811    | PLCG1   | 3864 | 3933 | 4.96079711516 |
| NM_182811    | PLCG1   | 4006 | 4090 | 3.96062336484 |
| NM_182811    | PLCG1   | 3071 | 3257 | 6.28272521005 |
| NM_182811    | PLCG1   | 2940 | 3041 | 4.96079711516 |
| NM_182811    | PLCG1   | 3580 | 3673 | 4.96079711516 |
| NM_182811    | PLCG1   | 462  | 561  | 5.96079711516 |
| NM_182811    | PLCG1   | 4160 | 4220 | 3.95677951498 |
| NM_182810    | ATF4    | 425  | 492  | 3.69792477629 |
| NM_182810    | ATF4    | 8    | 63   | 3.43489037046 |
| NM_182810    | ATF4    | 1333 | 1414 | 3.43489037046 |
| NM_182810    | ATF4    | 1002 | 1149 | 3.92031719763 |
| NM_182810    | ATF4    | 758  | 904  | 3.43489037046 |
| NM_182810    | ATF4    | 495  | 702  | 5.28288727701 |
| NM_182810    | ATF4    | 205  | 376  | 4.11296227557 |
| NM_017974    | ATG16L1 | 2248 | 2323 | 5.12149413471 |
| NM_017974    | ATG16L1 | 743  | 809  | 5.12149413471 |
| NM_017974    | ATG16L1 | 521  | 549  | 4.20161574392 |
| NM_017974    | ATG16L1 | 2374 | 2433 | 4.20161574392 |
| NM_001145064 | GATSL2  | 2650 | 2721 | 10.4654663307 |
| NM_001145064 | GATSL2  | 935  | 1007 | 9.46546633804 |
| NM_001145064 | GATSL2  | 1601 | 1645 | 10.4654663383 |
| NM_001145064 | GATSL2  | 4224 | 4279 | 11.050428839  |
| NM_001145064 | GATSL2  | 3627 | 3737 | 10.4654663383 |

|              |        |       |       |               |
|--------------|--------|-------|-------|---------------|
| NM_001145064 | GATSL2 | 5138  | 5201  | 9.46545960721 |
| NM_001145064 | GATSL2 | 866   | 911   | 10.0504221079 |
| NM_001145064 | GATSL2 | 4001  | 4051  | 9.38132712888 |
| NM_001145064 | GATSL2 | 4908  | 4960  | 9.38132712888 |
| NM_001145064 | GATSL2 | 1416  | 1453  | 8.38132712888 |
| NM_001145064 | GATSL2 | 592   | 640   | 9.46529258795 |
| NM_001145064 | GATSL2 | 279   | 372   | 8.46546633826 |
| NM_001145064 | GATSL2 | 1183  | 1266  | 8.46546633826 |
| NM_001145064 | GATSL2 | 5822  | 5919  | 10.050428839  |
| NM_001145064 | GATSL2 | 6964  | 7058  | 9.46546633826 |
| NM_001145064 | GATSL2 | 3256  | 3315  | 8.46546633826 |
| NM_001145064 | GATSL2 | 178   | 270   | 11.050428839  |
| NM_001145064 | GATSL2 | 7774  | 7906  | 10.7873944332 |
| NM_001145064 | GATSL2 | 4734  | 4833  | 9.46546633826 |
| NM_001145064 | GATSL2 | 7153  | 7261  | 9.46546633826 |
| NM_001145064 | GATSL2 | 2213  | 2335  | 11.050428839  |
| NM_001145064 | GATSL2 | 6729  | 6872  | 9.46546633826 |
| NM_001145064 | GATSL2 | 2738  | 2878  | 10.4654663383 |
| NM_001145064 | GATSL2 | 4541  | 4639  | 8.46546633826 |
| NM_013319    | UBIAD1 | 316   | 404   | 8.56170725877 |
| NM_013319    | UBIAD1 | 862   | 904   | 10.1506873597 |
| NM_013319    | UBIAD1 | 1430  | 1471  | 8.56571812789 |
| NM_013318    | PRRC2B | 10313 | 10373 | 7.17760645913 |
| NM_013318    | PRRC2B | 9159  | 9225  | 7.59264395819 |
| NM_013318    | PRRC2B | 6959  | 7031  | 7.59264395841 |
| NM_013318    | PRRC2B | 3776  | 3882  | 6.59264395819 |
| NM_013318    | PRRC2B | 10780 | 10868 | 7.17760645913 |
| NM_013318    | PRRC2B | 6905  | 6952  | 5.50850474903 |
| NM_013318    | PRRC2B | 10218 | 10299 | 5.59264395841 |
| NM_013318    | PRRC2B | 2184  | 2258  | 7.59264395841 |
| NM_013318    | PRRC2B | 6363  | 6442  | 5.59247020809 |
| NM_013318    | PRRC2B | 3261  | 3301  | 5.58862635824 |
| NM_013318    | PRRC2B | 2337  | 2424  | 7.17760645912 |
| NM_013318    | PRRC2B | 1108  | 1169  | 7.17760645913 |
| NM_013318    | PRRC2B | 5341  | 5414  | 7.17358885896 |
| NM_013318    | PRRC2B | 7742  | 7898  | 8.9145720533  |
| NM_013318    | PRRC2B | 7112  | 7181  | 6.59264395086 |
| NM_013318    | PRRC2B | 4628  | 4690  | 5.50850474903 |
| NM_013318    | PRRC2B | 6544  | 6585  | 5.50850474903 |
| NM_013318    | PRRC2B | 10021 | 10101 | 6.59263722736 |
| NM_013318    | PRRC2B | 5196  | 5302  | 7.17760645891 |
| NM_013318    | PRRC2B | 3376  | 3446  | 6.58862635824 |
| NM_013318    | PRRC2B | 1219  | 1383  | 8.39999888047 |
| NM_013318    | PRRC2B | 9874  | 9922  | 6.58862635824 |
| NM_013318    | PRRC2B | 5057  | 5106  | 5.59263722736 |
| NM_013318    | PRRC2B | 8905  | 9082  | 6.59264395841 |
| NM_013318    | PRRC2B | 4841  | 4916  | 6.5926439584  |
| NM_013318    | PRRC2B | 380   | 599   | 9.17760645913 |
| NM_013318    | PRRC2B | 43    | 177   | 8.9145720533  |
| NM_013318    | PRRC2B | 4260  | 4319  | 6.50850474903 |

|              |          |       |       |                    |
|--------------|----------|-------|-------|--------------------|
| NM_013318    | PRRC2B   | 10645 | 10774 | 7.17760645913      |
| NM_013318    | PRRC2B   | 908   | 1061  | 6.59264395841      |
| NM_013318    | PRRC2B   | 612   | 766   | 7.17760645913      |
| NM_024096    | DCTPP1   | 914   | 992   | 6.54199567637      |
| NM_018244    | UQCC     | 831   | 897   | 6.25055035081      |
| NM_018244    | UQCC     | 929   | 1011  | 4.66558785009      |
| NM_024094    | DSCC1    | 883   | 948   | 7.69151178319      |
| NM_024094    | DSCC1    | 370   | 471   | 8.69168552596      |
| NM_024095    | ASB8     | 340   | 399   | 9.74334788961      |
| NM_024092    | TMEM109  | 1001  | 1063  | 9.61432972418      |
| NM_024092    | TMEM109  | 1870  | 1925  | 10.936251088       |
| NM_024092    | TMEM109  | 765   | 995   | 12.7017925654      |
| NM_024092    | TMEM109  | 2080  | 2146  | 10.1992922249      |
| NM_024092    | TMEM109  | 1662  | 1822  | 12.4216846462      |
| NM_024092    | TMEM109  | 1984  | 2079  | 10.9362578191      |
| NM_024092    | TMEM109  | 320   | 750   | 14.1378916802      |
| NM_024092    | TMEM109  | 1132  | 1615  | 14.5450670617      |
| NM_024092    | TMEM109  | 2181  | 2301  | 11.4216846462      |
| NM_024093    | C2orf49  | 1889  | 1934  | 4.70218857244      |
| NM_024090    | ELOVL6   | 421   | 474   | 7.26741489196      |
| NM_024090    | ELOVL6   | 935   | 979   | 6.85639475694      |
| NM_024090    | ELOVL6   | 1034  | 1072  | 5.18729328275      |
| NM_024090    | ELOVL6   | 487   | 587   | 8.27143249213      |
| NM_024091    | FASTKD3  | 1734  | 1778  | 7.68249098812      |
| NM_024091    | FASTKD3  | 2152  | 2236  | 7.59852552906      |
| NM_001136258 | SGMS2    | 1073  | 1122  | 11.1158107292      |
| NM_001136258 | SGMS2    | 1155  | 1204  | 11.784738689       |
| NM_001136258 | SGMS2    | 974   | 1011  | 10.1158107292      |
| NM_001136258 | SGMS2    | 3590  | 3664  | 10.1999432076      |
| NM_001136258 | SGMS2    | 502   | 572   | 10.1158107292      |
| NM_001136258 | SGMS2    | 1376  | 1472  | 11.1999499384      |
| NM_182983    | HPN      | 1780  | 1814  | 5.00189282673      |
| NM_182983    | HPN      | 1257  | 1304  | 4.00189282673      |
| NM_182983    | HPN      | 1366  | 1468  | 4.00591042691      |
| NM_182983    | HPN      | 1890  | 1995  | 6.32783852179      |
| NM_182983    | HPN      | 1998  | 2024  | 4.92177121752      |
| NM_182983    | HPN      | 2239  | 2307  | 6.00591042691      |
| NM_182983    | HPN      | 1096  | 1226  | 6.59087292763      |
| NM_182983    | HPN      | 1553  | 1660  | 4.00591042691      |
| NM_182983    | HPN      | 887   | 1026  | 6.81326534896      |
| NM_182983    | HPN      | 1684  | 1737  | 5.00591042691      |
| NM_024098    | CCDC86   | 230   | 283   | 7.49358638486      |
| NM_024098    | CCDC86   | 1672  | 1764  | 6.49358638487      |
| NM_024098    | CCDC86   | 315   | 377   | 5.49357965381      |
| NM_024098    | CCDC86   | 1477  | 1588  | 7.81551447975      |
| NM_024099    | C11orf48 |       | 1029  | 1084 5.24431999951 |
| NM_003089    | SNRNP70  | 1013  | 1084  | 4.66917639849      |
| NM_003089    | SNRNP70  | 550   | 600   | 4.66917639849      |
| NM_003089    | SNRNP70  | 466   | 541   | 4.08421389777      |
| NM_003089    | SNRNP70  | 1752  | 1801  | 5.40614199265      |

|           |          |      |      |                 |               |
|-----------|----------|------|------|-----------------|---------------|
| NM_003089 | SNRNP70  | 1842 | 1910 | 4.66917639849   |               |
| NM_003089 | SNRNP70  | 646  | 738  | 4.66917639849   |               |
| NM_003089 | SNRNP70  | 1634 | 1752 | 5.40614199265   |               |
| NM_003089 | SNRNP70  | 741  | 1004 | 6.25413889921   |               |
| NM_003089 | SNRNP70  | 247  | 416  | 5.08421389777   |               |
| NM_003086 | SNAPC4   | 203  | 308  | 8.45195038745   |               |
| NM_003083 | SNAPC2   | 587  | 686  | 7.45743583051   |               |
| NM_018241 | TMEM184C |      | 1119 | 1225            | 8.57502063122 |
| NM_018241 | TMEM184C |      | 1838 | 1926            | 6.25308580527 |
| NM_018241 | TMEM184C |      | 1761 | 1804            | 6.25308580527 |
| NM_018241 | TMEM184C |      | 712  | 772             | 8.57502063099 |
| NM_018241 | TMEM184C |      | 1375 | 1466            | 8.25309253633 |
| NM_018241 | TMEM184C |      | 1583 | 1643            | 7.16895332694 |
| NM_018241 | TMEM184C |      | 779  | 882             | 7.83805503705 |
| NM_018241 | TMEM184C |      | 2162 | 2321            | 6.25309253633 |
| NM_018241 | TMEM184C |      | 530  | 641             | 9.25309253633 |
| NM_002687 | PNN      | 1665 | 1740 | 2.11474300963   |               |
| NM_002687 | PNN      | 638  | 777  | 0.792814914744  |               |
| NM_002687 | PNN      | 429  | 476  | -0.20719181631  |               |
| NM_002687 | PNN      | 845  | 951  | 0.792814914744  |               |
| NM_002687 | PNN      | 217  | 317  | 1.79281491474   |               |
| NM_002687 | PNN      | 2508 | 2618 | 2.11474300963   |               |
| NM_002687 | PNN      | 1256 | 1359 | 1.79281491474   |               |
| NM_002687 | PNN      | 98   | 206  | -0.207185085256 |               |
| NM_002687 | PNN      | 490  | 619  | 1.79281491474   |               |
| NM_018242 | SLC47A1  | 439  | 500  | 7.81970129404   |               |
| NM_018242 | SLC47A1  | 2229 | 2291 | 6.23473879332   |               |
| NM_018242 | SLC47A1  | 758  | 808  | 8.23473880087   |               |
| NM_018242 | SLC47A1  | 611  | 660  | 6.23473856495   |               |
| NM_018242 | SLC47A1  | 551  | 587  | 8.55666016471   |               |
| NM_018242 | SLC47A1  | 1748 | 1839 | 8.81970130159   |               |
| NM_018242 | SLC47A1  | 1606 | 1687 | 7.81970130159   |               |
| NM_018242 | SLC47A1  | 2113 | 2207 | 7.23473206982   |               |
| NM_018242 | SLC47A1  | 1980 | 2105 | 9.04209372293   |               |
| NM_018242 | SLC47A1  | 350  | 426  | 6.23473880087   |               |
| NM_018242 | SLC47A1  | 2942 | 3037 | 7.81970130159   |               |
| NM_018242 | SLC47A1  | 1268 | 1326 | 7.81970130159   |               |
| NM_018242 | SLC47A1  | 216  | 339  | 7.81970130159   |               |
| NM_018242 | SLC47A1  | 894  | 976  | 7.81970130159   |               |
| NM_018242 | SLC47A1  | 1086 | 1256 | 9.81970130159   |               |
| NM_018242 | SLC47A1  | 2411 | 2559 | 8.55666689576   |               |
| NM_018242 | SLC47A1  | 672  | 750  | 8.55666689576   |               |
| NM_018242 | SLC47A1  | 977  | 1064 | 7.23473856495   |               |
| NM_002869 | RAB6A    | 2436 | 2487 | 3.74298879838   |               |
| NM_002869 | RAB6A    | 1832 | 1918 | 4.3281250492    |               |
| NM_002869 | RAB6A    | 671  | 796  | 5.32812504942   |               |
| NM_002869 | RAB6A    | 439  | 478  | 2.65902333932   |               |
| NM_002869 | RAB6A    | 586  | 650  | 4.74316231278   |               |
| NM_002869 | RAB6A    | 1198 | 1252 | 3.65902333932   |               |
| NM_002869 | RAB6A    | 1055 | 1109 | 4.32812504187   |               |

|           |       |      |      |               |
|-----------|-------|------|------|---------------|
| NM_002869 | RAB6A | 2650 | 2702 | 3.73914494853 |
| NM_002868 | RAB5B | 2552 | 2613 | 4.24346716825 |
| NM_002868 | RAB5B | 1669 | 1711 | 5.8282559262  |
| NM_002868 | RAB5B | 2718 | 2761 | 4.23944957562 |
| NM_002868 | RAB5B | 691  | 778  | 6.24346716825 |
| NM_002868 | RAB5B | 1982 | 2028 | 5.24329342548 |
| NM_002868 | RAB5B | 3221 | 3253 | 5.74429046713 |
| NM_002868 | RAB5B | 3087 | 3170 | 5.2434671758  |
| NM_002868 | RAB5B | 2240 | 2323 | 5.82842967629 |
| NM_002868 | RAB5B | 1211 | 1334 | 4.24346717557 |
| NM_002868 | RAB5B | 3911 | 3995 | 4.2434671758  |
| NM_002867 | RAB3B | 9736 | 9812 | 12.0496992764 |
| NM_002867 | RAB3B | 927  | 991  | 10.4647367832 |
| NM_002867 | RAB3B | 542  | 612  | 10.4647300522 |
| NM_002867 | RAB3B | 2202 | 2263 | 11.3805975738 |
| NM_002867 | RAB3B | 6550 | 6596 | 10.4607191831 |
| NM_002867 | RAB3B | 2313 | 2392 | 12.049699048  |
| NM_002867 | RAB3B | 1072 | 1168 | 12.049699048  |
| NM_002867 | RAB3B | 418  | 504  | 11.4647300522 |
| NM_002867 | RAB3B | 2007 | 2147 | 12.4647367832 |
| NM_002867 | RAB3B | 7893 | 7957 | 10.464736783  |
| NM_002689 | POLA2 | 1188 | 1258 | 7.62175394393 |
| NM_002689 | POLA2 | 730  | 834  | 8.6257715441  |
| NM_002864 | PZP   | 1700 | 1738 | 8.52466300814 |
| NM_002864 | PZP   | 3131 | 3160 | 6.20273467734 |
| NM_002864 | PZP   | 2356 | 2466 | 11.1096255089 |
| NM_002864 | PZP   | 3265 | 3349 | 9.78769741398 |
| NM_002864 | PZP   | 3789 | 3824 | 6.20273491326 |
| NM_002864 | PZP   | 2292 | 2343 | 7.78769741398 |
| NM_002864 | PZP   | 161  | 231  | 9.52466300814 |
| NM_002864 | PZP   | 2467 | 2531 | 8.20273491326 |
| NM_002862 | PYGB  | 3547 | 3599 | 5.07724524269 |
| NM_002862 | PYGB  | 823  | 873  | 5.07340139283 |
| NM_002862 | PYGB  | 1687 | 1728 | 5.07724524269 |
| NM_002862 | PYGB  | 3407 | 3460 | 5.07741899301 |
| NM_002862 | PYGB  | 3264 | 3329 | 6.07741875709 |
| NM_002862 | PYGB  | 1475 | 1548 | 6.07741898546 |
| NM_002862 | PYGB  | 3349 | 3378 | 6.07741875709 |
| NM_002862 | PYGB  | 1143 | 1212 | 6.07741899301 |
| NM_002862 | PYGB  | 3939 | 3979 | 6.07724524269 |
| NM_002862 | PYGB  | 1356 | 1460 | 7.3993470879  |
| NM_002862 | PYGB  | 2563 | 2622 | 6.07741875709 |
| NM_002862 | PYGB  | 1826 | 1923 | 7.66238149373 |
| NM_002862 | PYGB  | 3008 | 3075 | 6.66237476268 |
| NM_002862 | PYGB  | 1981 | 2121 | 8.24734399445 |
| NM_002862 | PYGB  | 360  | 506  | 7.66238149373 |
| NM_002862 | PYGB  | 2338 | 2458 | 7.3993470879  |
| NM_002862 | PYGB  | 614  | 712  | 6.07741899301 |
| NM_002862 | PYGB  | 1584 | 1685 | 6.66238149373 |
| NM_002862 | PYGB  | 1020 | 1139 | 7.66238149373 |

|              |          |      |      |                    |
|--------------|----------|------|------|--------------------|
| NM_002861    | PCYT2    | 1802 | 1873 | 4.53677384059      |
| NM_002861    | PCYT2    | 770  | 839  | 4.95181110395      |
| NM_002861    | PCYT2    | 371  | 454  | 2.95181110395      |
| NM_002861    | PCYT2    | 991  | 1081 | 4.53676710954      |
| NM_002861    | PCYT2    | 603  | 718  | 4.53677384059      |
| NM_002861    | PCYT2    | 1317 | 1395 | 4.95181133965      |
| NM_024544    | MUL1     | 2147 | 2210 | 7.73816135388      |
| NM_024544    | MUL1     | 1083 | 1114 | 6.73431750403      |
| NM_024544    | MUL1     | 570  | 641  | 6.73833509665      |
| NM_024544    | MUL1     | 1526 | 1617 | 9.54569002626      |
| NM_024544    | MUL1     | 750  | 845  | 8.31928000475      |
| NM_024544    | MUL1     | 427  | 489  | 7.73833486828      |
| NM_024540    | MRPL24   | 493  | 547  | 7.29515090908      |
| NM_024540    | MRPL24   | 658  | 709  | 6.29515090908      |
| NM_024540    | MRPL24   | 227  | 337  | 8.29515091663      |
| NM_024541    | C10orf76 |      | 3062 | 3098 7.65588843923 |
| NM_024541    | C10orf76 |      | 721  | 760 7.57174923006  |
| NM_080918    | DGUOK    | 631  | 732  | 6.29869066014      |
| NM_080918    | DGUOK    | 742  | 786  | 6.29869042422      |
| NM_080918    | DGUOK    | 429  | 479  | 6.29467305997      |
| NM_080918    | DGUOK    | 513  | 611  | 9.1060455822       |
| NM_130781    | RAB24    | 882  | 947  | 4.69741897937      |
| NM_130781    | RAB24    | 1191 | 1267 | 6.28238171601      |
| NM_130781    | RAB24    | 747  | 879  | 6.69741921529      |
| NM_018248    | NEIL3    | 364  | 418  | 10.0210475058      |
| NM_080913    | ASGR2    | 633  | 698  | 5.08315498449      |
| NM_080913    | ASGR2    | 58   | 132  | 3.08315498449      |
| NM_080913    | ASGR2    | 262  | 321  | 3.66811748521      |
| NM_080913    | ASGR2    | 706  | 1377 | 7.78359470263      |
| NM_080913    | ASGR2    | 327  | 633  | 6.33108249793      |
| NM_153322    | PMP22    | 190  | 245  | 11.1923866609      |
| NM_001190810 | AGAP9    | 2027 | 2085 | 8.13806116403      |
| NM_001190810 | AGAP9    | 445  | 536  | 8.14207875665      |
| NM_001190810 | AGAP9    | 584  | 649  | 8.14190501388      |
| NM_001190810 | AGAP9    | 2156 | 2201 | 10.1420720331      |
| NM_001190810 | AGAP9    | 2206 | 2253 | 8.14207203315      |
| NM_019896    | POLE4    | 230  | 292  | 5.8636800523       |
| NM_019896    | POLE4    | 333  | 421  | 6.86368678335      |
| NM_019896    | POLE4    | 532  | 595  | 6.8636800523       |
| NM_001085365 | MZT2A    | 265  | 339  | 8.23291920526      |
| NM_001085365 | MZT2A    | 201  | 246  | 5.42555755215      |
| NM_001085365 | MZT2A    | 343  | 424  | 7.01052678393      |
| NM_001085367 | ZNF655   | 307  | 366  | 8.40613562036      |
| NM_001085367 | ZNF655   | 1165 | 1217 | 9.0712197303       |
| NM_001085367 | ZNF655   | 441  | 504  | 8.99109812108      |
| NM_001085367 | ZNF655   | 1061 | 1107 | 7.49027459383      |
| NM_001085367 | ZNF655   | 592  | 658  | 9.07523733047      |
| NM_001947    | DUSP7    | 2391 | 2436 | 8.11326224116      |
| NM_004836    | EIF2AK3  | 2716 | 2753 | 7.90365018179      |
| NM_004836    | EIF2AK3  | 2878 | 2926 | 5.90365018179      |



|           |         |      |      |               |
|-----------|---------|------|------|---------------|
| NM_004836 | EIF2AK3 | 870  | 925  | 7.40448020418 |
| NM_004836 | EIF2AK3 | 2464 | 2535 | 6.89963931267 |
| NM_004836 | EIF2AK3 | 3089 | 3123 | 5.90365018179 |
| NM_004836 | EIF2AK3 | 622  | 701  | 7.48861941356 |
| NM_004836 | EIF2AK3 | 2005 | 2125 | 7.90365691285 |
| NM_004836 | EIF2AK3 | 926  | 1001 | 6.90365691263 |
| NM_004836 | EIF2AK3 | 2581 | 2708 | 8.48861941357 |
| NM_004836 | EIF2AK3 | 2295 | 2411 | 8.22558500773 |
| NM_004836 | EIF2AK3 | 1159 | 1293 | 8.22558500773 |
| NM_004466 | GPC5    | 1365 | 1397 | 11.5211707543 |
| NM_004466 | GPC5    | 182  | 266  | 12.5251883543 |
| NM_004466 | GPC5    | 843  | 912  | 12.5250146042 |
| NM_004466 | GPC5    | 1397 | 1474 | 13.5251883545 |
| NM_004466 | GPC5    | 650  | 719  | 11.5251883469 |
| NM_004466 | GPC5    | 925  | 1032 | 12.5251883545 |
| NM_014572 | LATS2   | 4010 | 4037 | 6.08244168065 |
| NM_014573 | TMEM97  | 1169 | 1210 | 6.3560345754  |
| NM_014573 | TMEM97  | 844  | 904  | 7.35603481132 |
| NM_014573 | TMEM97  | 1696 | 1820 | 8.35603481132 |
| NM_014573 | TMEM97  | 2019 | 2135 | 8.16338973338 |
| NM_014573 | TMEM97  | 904  | 946  | 6.3560345754  |
| NM_014573 | TMEM97  | 1344 | 1449 | 6.94099731204 |
| NM_014573 | TMEM97  | 968  | 1096 | 7.94099731204 |
| NM_014573 | TMEM97  | 85   | 611  | 11.4853178283 |
| NM_014573 | TMEM97  | 1217 | 1334 | 7.35603481132 |
| NM_014573 | TMEM97  | 611  | 771  | 9.05647452946 |
| NM_014570 | ARFGAP3 | 1100 | 1157 | 5.29635288112 |
| NM_014570 | ARFGAP3 | 1910 | 2020 | 6.0333187112  |
| NM_014577 | BRD1    | 3318 | 3355 | 5.82268912958 |
| NM_014577 | BRD1    | 4217 | 4254 | 7.41166249942 |
| NM_014577 | BRD1    | 1697 | 1737 | 5.82670649384 |
| NM_014577 | BRD1    | 4061 | 4117 | 5.8266999987  |
| NM_014577 | BRD1    | 3991 | 4047 | 5.8266999987  |
| NM_014577 | BRD1    | 3376 | 3413 | 5.74256752037 |
| NM_014577 | BRD1    | 3724 | 3771 | 6.82670649384 |
| NM_014577 | BRD1    | 3125 | 3223 | 6.8266999987  |
| NM_014577 | BRD1    | 644  | 688  | 6.82268912958 |
| NM_014577 | BRD1    | 910  | 982  | 5.82653297944 |
| NM_014577 | BRD1    | 3880 | 3954 | 8.14863482464 |
| NM_014577 | BRD1    | 4343 | 4502 | 7.41166923048 |
| NM_014577 | BRD1    | 1793 | 1875 | 6.82670672221 |
| NM_012229 | NT5C2   | 1460 | 1511 | 6.23650560887 |
| NM_012229 | NT5C2   | 1176 | 1225 | 6.23667912326 |
| NM_012229 | NT5C2   | 389  | 437  | 5.65171685091 |
| NM_012229 | NT5C2   | 2330 | 2382 | 6.64769925829 |
| NM_012229 | NT5C2   | 613  | 659  | 4.64769925829 |
| NM_012229 | NT5C2   | 744  | 817  | 6.97364495313 |
| NM_012229 | NT5C2   | 1553 | 1616 | 5.65154310814 |
| NM_012229 | NT5C2   | 515  | 608  | 6.65171685846 |
| NM_012229 | NT5C2   | 2033 | 2079 | 6.23667262813 |

|              |          |      |      |               |               |
|--------------|----------|------|------|---------------|---------------|
| NM_012229    | NT5C2    | 962  | 1083 | 7.23667935918 |               |
| NM_012229    | NT5C2    | 1624 | 1714 | 5.65154310814 |               |
| NM_012229    | NT5C2    | 1303 | 1437 | 6.23667935918 |               |
| NM_005486    | TOM1L1   | 701  | 781  | 8.03808104367 |               |
| NM_005486    | TOM1L1   | 934  | 994  | 5.45311830703 |               |
| NM_005480    | TROAP    | 1857 | 1917 | 9.83098833741 |               |
| NM_005480    | TROAP    | 222  | 330  | 9.83099506847 |               |
| NM_005481    | MED16    | 444  | 515  | 9.14116583938 |               |
| NM_005481    | MED16    | 1149 | 1238 | 7.55620333866 |               |
| NM_005481    | MED16    | 1321 | 1399 | 7.55620333866 |               |
| NM_005481    | MED16    | 2083 | 2133 | 8.55218573849 |               |
| NM_005481    | MED16    | 233  | 316  | 8.55620310274 |               |
| NM_005481    | MED16    | 1874 | 1985 | 9.55620333866 |               |
| NM_005481    | MED16    | 73   | 233  | 9.55620333866 |               |
| NM_005481    | MED16    | 323  | 385  | 7.55620333111 |               |
| NM_005481    | MED16    | 2223 | 2303 | 8.55620333844 |               |
| NM_005481    | MED16    | 2530 | 2614 | 7.55218573849 |               |
| NM_005482    | PIGK     | 866  | 927  | 6.13048452359 |               |
| NM_005482    | PIGK     | 567  | 644  | 6.86745011798 |               |
| NM_005482    | PIGK     | 507  | 551  | 5.54552178717 |               |
| NM_005482    | PIGK     | 716  | 759  | 4.4613828137  |               |
| NM_005482    | PIGK     | 310  | 350  | 4.4613828137  |               |
| NM_005482    | PIGK     | 66   | 113  | 6.86744988206 |               |
| NM_005482    | PIGK     | 662  | 712  | 6.54534827277 |               |
| NM_005482    | PIGK     | 1241 | 1275 | 5.54150442292 |               |
| NM_005482    | PIGK     | 787  | 833  | 6.54150442292 |               |
| NM_005482    | PIGK     | 1020 | 1194 | 7.86745011798 |               |
| NM_005482    | PIGK     | 172  | 246  | 6.54552202309 |               |
| NM_005482    | PIGK     | 929  | 1019 | 5.54552202309 |               |
| NM_005482    | PIGK     | 376  | 436  | 6.13048452381 |               |
| NM_005483    | CHAF1A   | 2481 | 2553 | 6.76858832018 |               |
| NM_005483    | CHAF1A   | 245  | 287  | 6.85272752934 |               |
| NM_005483    | CHAF1A   | 443  | 490  | 7.85272079851 |               |
| NM_005483    | CHAF1A   | 3076 | 3175 | 8.43769003028 |               |
| NM_005483    | CHAF1A   | 1982 | 2075 | 7.85272752956 |               |
| NM_005483    | CHAF1A   | 1771 | 1840 | 6.85255377924 |               |
| NM_005483    | CHAF1A   | 2331 | 2403 | 7.84870992939 |               |
| NM_005483    | CHAF1A   | 2150 | 2217 | 6.84870992939 |               |
| NM_005483    | CHAF1A   | 2755 | 2816 | 8.43769002273 |               |
| NM_080704    | TRPV1    | 3008 | 3105 | 7.08634784862 |               |
| NM_080704    | TRPV1    | 3294 | 3362 | 7.08635457967 |               |
| NM_001035235 | SRA1     | 934  | 987  | 7.5948236688  |               |
| NM_003629    | PIK3R3   | 1831 | 1891 | 10.532254789  |               |
| NM_001038603 | MARVELD2 |      | 1168 | 1237          | 7.92859176224 |
| NM_001038603 | MARVELD2 |      | 1243 | 1323          | 6.92876551256 |
| NM_001038603 | MARVELD2 |      | 1325 | 1365          | 8.51355426297 |
| NM_001038603 | MARVELD2 |      | 1693 | 1743          | 7.92876527664 |
| NM_001038603 | MARVELD2 |      | 302  | 346           | 7.92875878151 |
| NM_001038603 | MARVELD2 |      | 1557 | 1610          | 7.92876551256 |
| NM_001038603 | MARVELD2 |      | 1371 | 1461          | 8.51372801306 |

|              |          |      |      |               |               |
|--------------|----------|------|------|---------------|---------------|
| NM_001038603 | MARVELD2 |      | 592  | 703           | 8.92876551256 |
| NM_001038603 | MARVELD2 |      | 229  | 292           | 8.51372801328 |
| NM_001038603 | MARVELD2 |      | 719  | 807           | 8.51372801328 |
| NM_001038603 | MARVELD2 |      | 1473 | 1542          | 9.2506935999  |
| NM_001038603 | MARVELD2 |      | 834  | 971           | 10.7361204346 |
| NM_001038603 | MARVELD2 |      | 1789 | 1881          | 7.92876551256 |
| NM_001038603 | MARVELD2 |      | 1073 | 1155          | 8.92876551256 |
| NM_080703    | BAG6     | 3289 | 3341 | 5.70966749335 |               |
| NM_080703    | BAG6     | 116  | 184  | 6.44663308751 |               |
| NM_080703    | BAG6     | 1617 | 1693 | 6.12470499262 |               |
| NM_080703    | BAG6     | 2670 | 2759 | 6.12470499262 |               |
| NM_080703    | BAG6     | 1826 | 1935 | 6.70966749335 |               |
| NM_080703    | BAG6     | 1417 | 1490 | 7.12470499262 |               |
| NM_080703    | BAG6     | 3346 | 3419 | 5.12470499262 |               |
| NM_080703    | BAG6     | 663  | 714  | 4.12453124231 |               |
| NM_080703    | BAG6     | 3666 | 3705 | 4.12470499262 |               |
| NM_080703    | BAG6     | 801  | 832  | 4.04056578324 |               |
| NM_080703    | BAG6     | 2768 | 2828 | 4.12470499262 |               |
| NM_080703    | BAG6     | 1524 | 1556 | 4.12453124231 |               |
| NM_080703    | BAG6     | 288  | 414  | 7.12470499262 |               |
| NM_080703    | BAG6     | 2336 | 2392 | 5.12470499262 |               |
| NM_080703    | BAG6     | 2478 | 2617 | 8.37263250607 |               |
| NM_080703    | BAG6     | 1955 | 1991 | 4.04056578324 |               |
| NM_080703    | BAG6     | 2851 | 3131 | 8.87959249479 |               |
| NM_080703    | BAG6     | 1184 | 1345 | 7.58413661126 |               |
| NM_080703    | BAG6     | 920  | 995  | 5.12470498508 |               |
| NM_080703    | BAG6     | 422  | 647  | 7.29462999407 |               |
| NM_080703    | BAG6     | 718  | 788  | 6.44663285159 |               |
| NM_080703    | BAG6     | 2066 | 2188 | 6.44663308751 |               |
| NM_003620    | PPM1D    | 3680 | 3718 | 6.93925341463 |               |
| NM_003620    | PPM1D    | 1388 | 1435 | 7.93524254551 |               |
| NM_003624    | RANBP3   | 2500 | 2587 | 5.3663740964  |               |
| NM_003624    | RANBP3   | 1533 | 1606 | 6.36636736557 |               |
| NM_003624    | RANBP3   | 1117 | 1167 | 6.36637409662 |               |
| NM_003624    | RANBP3   | 2391 | 2489 | 6.36637409663 |               |
| NM_003624    | RANBP3   | 2179 | 2249 | 6.36637409663 |               |
| NM_003624    | RANBP3   | 977  | 1078 | 7.68830219151 |               |
| NM_003624    | RANBP3   | 2600 | 2650 | 6.86719738796 |               |
| NM_018476    | BEX1     | 538  | 580  | 4.62010385219 |               |
| NM_018476    | BEX1     | 323  | 411  | 5.94203194709 |               |
| NM_018476    | BEX1     | 581  | 634  | 6.94203194709 |               |
| NM_018476    | BEX1     | 635  | 832  | 7.94203194709 |               |
| NM_018476    | BEX1     | 417  | 532  | 7.32054357034 |               |
| NM_018476    | BEX1     | 119  | 272  | 6.20506635292 |               |
| NM_018475    | TMEM165  | 560  | 622  | 7.52739598222 |               |
| NM_018475    | TMEM165  | 967  | 1043 | 6.30500356089 |               |
| NM_018475    | TMEM165  | 380  | 429  | 4.72004082425 |               |
| NM_018475    | TMEM165  | 675  | 732  | 7.30500356089 |               |
| NM_018475    | TMEM165  | 640  | 674  | 4.72004082425 |               |
| NM_018475    | TMEM165  | 196  | 247  | 6.72004082425 |               |

|              |         |      |      |               |
|--------------|---------|------|------|---------------|
| NM_018475    | TMEM165 | 1400 | 1456 | 6.30482981057 |
| NM_018475    | TMEM165 | 1223 | 1314 | 6.30500356089 |
| NM_018475    | TMEM165 | 473  | 555  | 6.30500356089 |
| NM_018475    | TMEM165 | 306  | 368  | 6.72004106017 |
| NM_018475    | TMEM165 | 1501 | 1544 | 5.71986730985 |
| NM_018475    | TMEM165 | 1045 | 1215 | 8.1794726788  |
| NM_018475    | TMEM165 | 746  | 939  | 8.42048077831 |
| NM_018475    | TMEM165 | 96   | 164  | 5.72004106017 |
| NM_018475    | TMEM165 | 1319 | 1397 | 8.30500356089 |
| NM_018475    | TMEM165 | 1777 | 1840 | 4.71602345999 |
| NM_207119    | LRRC20  | 1502 | 1552 | 10.2143375632 |
| NM_018473    | ACOT13  | 103  | 192  | 4.01563509084 |
| NM_018473    | ACOT13  | 420  | 464  | 3.27849574636 |
| NM_018473    | ACOT13  | 1212 | 1277 | 1.69370699595 |
| NM_018473    | ACOT13  | 1318 | 1389 | 1.69370698841 |
| NM_001145315 | DSN1    | 1006 | 1066 | 7.39581288451 |
| NM_001145315 | DSN1    | 174  | 214  | 7.31167367535 |
| NM_001145315 | DSN1    | 958  | 1003 | 7.39580615368 |
| NM_001145315 | DSN1    | 2062 | 2119 | 8.39581264882 |
| NM_001145315 | DSN1    | 1178 | 1252 | 7.39580615368 |
| NM_001145315 | DSN1    | 512  | 573  | 7.39179528456 |
| NM_001145315 | DSN1    | 1306 | 1337 | 6.39179528456 |
| NM_001145315 | DSN1    | 1568 | 1617 | 6.39581264882 |
| NM_207113    | SLC37A3 | 713  | 775  | 9.2608380735  |
| NM_207113    | SLC37A3 | 655  | 711  | 7.26083134244 |
| NM_207113    | SLC37A3 | 1532 | 1585 | 8.845800574   |
| NM_207113    | SLC37A3 | 2434 | 2484 | 7.26083807349 |
| NM_207113    | SLC37A3 | 2323 | 2393 | 9.58276616838 |
| NM_207113    | SLC37A3 | 250  | 313  | 9.26083806595 |
| NM_207113    | SLC37A3 | 439  | 496  | 8.84580057422 |
| NM_207113    | SLC37A3 | 1383 | 1473 | 8.26083134244 |
| NM_207113    | SLC37A3 | 529  | 655  | 10.2608380735 |
| NM_207113    | SLC37A3 | 2994 | 3129 | 8.84580057422 |
| NM_207113    | SLC37A3 | 2002 | 2058 | 8.84580057421 |
| NM_207113    | SLC37A3 | 829  | 899  | 8.84580057421 |
| NM_207113    | SLC37A3 | 1871 | 1979 | 9.84580057422 |
| NM_001145319 | PLS1    | 1130 | 1218 | 8.68022836644 |
| NM_001145319 | PLS1    | 545  | 618  | 7.26519086716 |
| NM_001145319 | PLS1    | 1662 | 1706 | 7.26117326699 |
| NM_001145319 | PLS1    | 448  | 491  | 5.68022163539 |
| NM_001145319 | PLS1    | 236  | 295  | 7.26519086694 |
| NM_001145319 | PLS1    | 650  | 689  | 7.26519085961 |
| NM_001145319 | PLS1    | 728  | 791  | 8.00215646133 |
| NM_001145319 | PLS1    | 1021 | 1070 | 6.68022836644 |
| NM_001145319 | PLS1    | 1306 | 1400 | 8.00215646133 |
| NM_001145319 | PLS1    | 3405 | 3476 | 5.59608915706 |
| NM_001145319 | PLS1    | 295  | 350  | 6.68022836644 |
| NM_001145319 | PLS1    | 1409 | 1481 | 6.68022836622 |
| NM_001145319 | PLS1    | 1873 | 2053 | 8.4875832885  |
| NM_001145319 | PLS1    | 797  | 1005 | 9.26519086716 |

|              |         |      |      |               |
|--------------|---------|------|------|---------------|
| NM_001145319 | PLS1    | 1524 | 1573 | 5.68022163539 |
| NM_207116    | RNF216  | 4217 | 4275 | 5.06985859725 |
| NM_207116    | RNF216  | 3461 | 3545 | 7.39178669968 |
| NM_207116    | RNF216  | 459  | 530  | 6.06985860479 |
| NM_207116    | RNF216  | 2066 | 2118 | 6.65080350534 |
| NM_207116    | RNF216  | 2442 | 2486 | 6.06968485448 |
| NM_207116    | RNF216  | 2132 | 2266 | 6.65482110552 |
| NM_207116    | RNF216  | 1192 | 1262 | 6.06985860479 |
| NM_207116    | RNF216  | 1736 | 1819 | 6.06985860457 |
| NM_207116    | RNF216  | 752  | 810  | 5.98571939541 |
| NM_207115    | ZNF580  | 840  | 912  | 10.795482321  |
| NM_014316    | CARHSP1 | 1515 | 1555 | 3.99694701755 |
| NM_014316    | CARHSP1 | 34   | 85   | 5.58190975419 |
| NM_014316    | CARHSP1 | 95   | 139  | 3.99694724592 |
| NM_014316    | CARHSP1 | 185  | 235  | 3.99694724592 |
| NM_014316    | CARHSP1 | 996  | 1050 | 5.99694052242 |
| NM_014316    | CARHSP1 | 459  | 494  | 5.58173600387 |
| NM_014316    | CARHSP1 | 2466 | 2551 | 5.58190975419 |
| NM_014316    | CARHSP1 | 1059 | 1110 | 4.99694052242 |
| NM_014316    | CARHSP1 | 1722 | 1794 | 3.99694725347 |
| NM_014316    | CARHSP1 | 396  | 445  | 4.99694052242 |
| NM_014316    | CARHSP1 | 1892 | 1967 | 5.9929296533  |
| NM_001100812 | CXCL16  | 1042 | 1103 | 5.89919749064 |
| NM_001100812 | CXCL16  | 830  | 932  | 8.06912249208 |
| NM_001100812 | CXCL16  | 1294 | 1362 | 6.89919749042 |
| NM_001100812 | CXCL16  | 747  | 790  | 4.89919749042 |
| NM_001100812 | CXCL16  | 376  | 421  | 4.81505828126 |
| NM_001100812 | CXCL16  | 487  | 556  | 5.89919749063 |
| NM_014315    | KLHDC2  | 1646 | 1686 | 4.77127651434 |
| NM_014315    | KLHDC2  | 395  | 445  | 3.85540899267 |
| NM_014315    | KLHDC2  | 1381 | 1414 | 3.77127651434 |
| NM_014315    | KLHDC2  | 581  | 655  | 5.85541572372 |
| NM_014315    | KLHDC2  | 1070 | 1136 | 4.85139812355 |
| NM_005667    | RNF103  | 931  | 974  | 6.4040045776  |
| NM_005667    | RNF103  | 1837 | 1885 | 5.81921581965 |
| NM_005667    | RNF103  | 1541 | 1613 | 5.8192158272  |
| NM_005667    | RNF103  | 1713 | 1831 | 7.98914082864 |
| NM_005667    | RNF103  | 2177 | 2235 | 5.81921559128 |
| NM_005667    | RNF103  | 1184 | 1241 | 5.81921582698 |
| NM_005667    | RNF103  | 1413 | 1442 | 4.81519822703 |
| NM_005667    | RNF103  | 3381 | 3424 | 4.81921559128 |
| NM_005667    | RNF103  | 1053 | 1172 | 5.8192158272  |
| NM_005667    | RNF103  | 1615 | 1681 | 6.8192158272  |
| NM_005667    | RNF103  | 2327 | 2643 | 10.2454805819 |
| NM_005667    | RNF103  | 2660 | 2752 | 6.8192158272  |
| NM_005667    | RNF103  | 695  | 790  | 6.8192158272  |
| NM_005667    | RNF103  | 2783 | 2957 | 9.14114392209 |
| NM_005667    | RNF103  | 2038 | 2130 | 7.14114392209 |
| NM_005667    | RNF103  | 1908 | 2038 | 7.8192158272  |
| NM_005667    | RNF103  | 2259 | 2326 | 4.81921581965 |

|           |          |      |      |                    |
|-----------|----------|------|------|--------------------|
| NM_005667 | RNF103   | 1304 | 1389 | 5.81920909615      |
| NM_005667 | RNF103   | 3129 | 3227 | 4.8192158272       |
| NM_005669 | REEP5    | 529  | 587  | 7.27560704703      |
| NM_005669 | REEP5    | 994  | 1047 | 4.68662694614      |
| NM_005669 | REEP5    | 2338 | 2411 | 6.27560704703      |
| NM_005669 | REEP5    | 1697 | 1754 | 4.69064431039      |
| NM_005669 | REEP5    | 1153 | 1208 | 4.69063781526      |
| NM_005669 | REEP5    | 2613 | 2704 | 4.68662694614      |
| NM_005669 | REEP5    | 593  | 869  | 9.49799946837      |
| NM_005669 | REEP5    | 408  | 527  | 8.77810738756      |
| NM_005669 | REEP5    | 357  | 405  | 5.69064431039      |
| NM_005669 | REEP5    | 147  | 350  | 9.21420650237      |
| NM_152379 | C1orf131 |      | 960  | 1003 5.30760803143 |
| NM_023018 | NADK     | 3055 | 3147 | 5.95723795305      |
| NM_023018 | NADK     | 2974 | 3026 | 5.95322035288      |
| NM_023018 | NADK     | 2415 | 2547 | 8.27916604794      |
| NM_023018 | NADK     | 2352 | 2403 | 5.957231222        |
| NM_023018 | NADK     | 2681 | 2761 | 7.54220045377      |
| NM_023018 | NADK     | 1446 | 1487 | 6.87309874367      |
| NM_023018 | NADK     | 2208 | 2352 | 8.76459287511      |
| NM_023018 | NADK     | 384  | 540  | 8.27916604794      |
| NM_023018 | NADK     | 185  | 341  | 8.54220045377      |
| NM_023018 | NADK     | 549  | 718  | 8.27916604794      |
| NM_023018 | NADK     | 2820 | 2944 | 6.95723795305      |
| NM_023018 | NADK     | 734  | 905  | 9.41666957169      |
| NM_023018 | NADK     | 1621 | 1817 | 9.54220045377      |
| NM_023018 | NADK     | 911  | 1402 | 9.86412854866      |
| NM_023015 | INTS3    | 1004 | 1073 | 7.40480572304      |
| NM_023015 | INTS3    | 2900 | 2993 | 7.40480572304      |
| NM_023015 | INTS3    | 474  | 537  | 7.40480548712      |
| NM_023015 | INTS3    | 327  | 363  | 5.81984322209      |
| NM_023015 | INTS3    | 2335 | 2399 | 5.81984322231      |
| NM_023015 | INTS3    | 1084 | 1129 | 5.81582562214      |
| NM_023015 | INTS3    | 1754 | 1802 | 5.73570401293      |
| NM_023015 | INTS3    | 2820 | 2894 | 6.81984322231      |
| NM_023015 | INTS3    | 1529 | 1608 | 7.40479899198      |
| NM_023015 | INTS3    | 1234 | 1350 | 7.81984322231      |
| NM_023015 | INTS3    | 2557 | 2590 | 6.81582562214      |
| NM_023015 | INTS3    | 1813 | 1856 | 5.81983649126      |
| NM_023015 | INTS3    | 2696 | 2749 | 7.40480548712      |
| NM_023015 | INTS3    | 4095 | 4135 | 5.73570401293      |
| NM_023015 | INTS3    | 2075 | 2176 | 7.81984322231      |
| NM_023015 | INTS3    | 829  | 925  | 5.81984322231      |
| NM_023015 | INTS3    | 1369 | 1466 | 8.14176458615      |
| NM_023015 | INTS3    | 667  | 753  | 7.40480572304      |
| NM_023015 | INTS3    | 3696 | 3776 | 7.40480571549      |
| NM_023015 | INTS3    | 3268 | 3354 | 6.81984322231      |
| NM_023012 | RSRC2    | 1763 | 1804 | 3.71512562075      |
| NM_023011 | UPF3A    | 1737 | 1781 | 5.02455660089      |
| NM_023011 | UPF3A    | 1826 | 1918 | 5.10869580272      |

|              |                |      |      |               |
|--------------|----------------|------|------|---------------|
| NM_023011    | UPF3A          | 2247 | 2309 | 6.43062390516 |
| NM_023011    | UPF3A          | 1648 | 1710 | 6.43045015484 |
| NM_023011    | UPF3A          | 334  | 373  | 5.1046782101  |
| NM_023011    | UPF3A          | 395  | 495  | 4.1046782101  |
| NM_023011    | UPF3A          | 2035 | 2148 | 5.10869581027 |
| NM_001077619 | UBXN2B         | 457  | 526  | 9.53157528742 |
| NM_001077619 | UBXN2B         | 280  | 345  | 8.53157528742 |
| NM_001077619 | UBXN2B         | 2153 | 2226 | 8.53157528742 |
| NM_014453    | CHMP2A         | 482  | 609  | 5.99646638688 |
| NM_014453    | CHMP2A         | 144  | 185  | 4.99629263656 |
| NM_014453    | CHMP2A         | 201  | 336  | 3.99646638688 |
| NM_005708    | GPC6           | 869  | 908  | 7.58447176084 |
| NM_005708    | GPC6           | 4517 | 4568 | 7.58045439658 |
| NM_005708    | GPC6           | 265  | 393  | 9.58447199676 |
| NM_005708    | GPC6           | 3738 | 3795 | 7.58045439658 |
| NM_005708    | GPC6           | 3809 | 3888 | 6.58447176084 |
| NM_005708    | GPC6           | 470  | 505  | 6.50033278737 |
| NM_005708    | GPC6           | 112  | 173  | 6.5844652657  |
| NM_005708    | GPC6           | 3084 | 3142 | 6.50033278737 |
| NM_005708    | GPC6           | 2297 | 2411 | 9.58447199676 |
| NM_005708    | GPC6           | 2080 | 2126 | 6.58429824644 |
| NM_005708    | GPC6           | 2851 | 2914 | 6.5844652657  |
| NM_005708    | GPC6           | 597  | 755  | 9.7543969982  |
| NM_005708    | GPC6           | 1363 | 1503 | 9.39182691881 |
| NM_005708    | GPC6           | 1513 | 1622 | 9.39182691881 |
| NM_005708    | GPC6           | 1918 | 2053 | 9.58447199676 |
| NM_005708    | GPC6           | 758  | 837  | 9.16943449748 |
| NM_005708    | GPC6           | 2448 | 2576 | 7.58447199676 |
| NM_005708    | GPC6           | 923  | 1337 | 12.1390608484 |
| NM_005708    | GPC6           | 412  | 468  | 7.58045439658 |
| NM_005708    | GPC6           | 1732 | 1872 | 8.90640009164 |
| NM_001204513 | RBAK-LOC389458 | 167  | 245  | 7.60332186147 |
| NM_001015045 | FAM13A         | 864  | 919  | 5.29962666551 |
| NM_152522    | ARL6IP6        | 2261 | 2314 | 5.01412236786 |
| NM_152522    | ARL6IP6        | 1043 | 1406 | 9.41045739081 |
| NM_001204510 | EIF4A1         | 1596 | 1667 | 3.06271960885 |
| NM_001204510 | EIF4A1         | 1529 | 1596 | 3.06271960131 |
| NM_001204510 | EIF4A1         | 1264 | 1364 | 2.64768210958 |
| NM_001204510 | EIF4A1         | 1368 | 1521 | 3.38464770374 |
| NM_001204510 | EIF4A1         | 128  | 1262 | 8.51393072069 |
| NM_032039    | ITFG3          | 1475 | 1538 | 8.58637704654 |
| NM_032039    | ITFG3          | 2117 | 2154 | 7.50223784471 |
| NM_032039    | ITFG3          | 429  | 487  | 9.90830514897 |
| NM_032039    | ITFG3          | 2548 | 2663 | 9.90830514898 |
| NM_032039    | ITFG3          | 690  | 774  | 10.7563020555 |
| NM_032039    | ITFG3          | 903  | 944  | 8.58235945392 |
| NM_032039    | ITFG3          | 1581 | 1693 | 10.1713395548 |
| NM_032039    | ITFG3          | 2819 | 2936 | 10.5863770541 |
| NM_032039    | ITFG3          | 586  | 679  | 9.17133955481 |
| NM_032039    | ITFG3          | 2163 | 2240 | 8.58637032304 |

|              |        |      |      |               |
|--------------|--------|------|------|---------------|
| NM_032039    | ITFG3  | 1843 | 1916 | 8.58637705409 |
| NM_030938    | VMP1   | 2035 | 2146 | 6.91032406483 |
| NM_030938    | VMP1   | 236  | 365  | 7.23225215971 |
| NM_030938    | VMP1   | 737  | 909  | 7.81721466043 |
| NM_030938    | VMP1   | 365  | 538  | 7.61076378297 |
| NM_030938    | VMP1   | 1205 | 1323 | 6.71767898688 |
| NM_030938    | VMP1   | 1573 | 1699 | 5.49528656555 |
| NM_030938    | VMP1   | 1701 | 1818 | 6.23225215971 |
| NM_030938    | VMP1   | 912  | 1158 | 8.66521156699 |
| NM_030938    | VMP1   | 1348 | 1566 | 8.36975568346 |
| NM_030938    | VMP1   | 551  | 707  | 7.91032406483 |
| NM_000543    | SMPD1  | 2284 | 2312 | 9.98456666111 |
| NM_000543    | SMPD1  | 2367 | 2439 | 10.9885842611 |
| NM_000543    | SMPD1  | 1643 | 1717 | 11.5735467545 |
| NM_000543    | SMPD1  | 1462 | 1504 | 11.573540031  |
| NM_000543    | SMPD1  | 679  | 745  | 11.9885842613 |
| NM_000543    | SMPD1  | 1041 | 1102 | 9.98841051097 |
| NM_000543    | SMPD1  | 999  | 1034 | 10.9044450519 |
| NM_000543    | SMPD1  | 1291 | 1416 | 13.4480158799 |
| NM_000543    | SMPD1  | 309  | 367  | 11.573546762  |
| NM_000543    | SMPD1  | 1792 | 1838 | 9.98456666111 |
| NM_000543    | SMPD1  | 477  | 527  | 9.98456666111 |
| NM_000543    | SMPD1  | 905  | 980  | 9.98858402536 |
| NM_000543    | SMPD1  | 1927 | 2023 | 9.98858426128 |
| NM_000543    | SMPD1  | 1507 | 1637 | 12.573546762  |
| NM_133474    | ZNF721 | 327  | 385  | 7.13977095903 |
| NM_133474    | ZNF721 | 186  | 224  | 7.13977095903 |
| NM_133474    | ZNF721 | 1947 | 2017 | 7.22391016087 |
| NM_133474    | ZNF721 | 2152 | 2247 | 7.2239099325  |
| NM_002754    | MAPK13 | 1060 | 1119 | 5.18035921027 |
| NM_002754    | MAPK13 | 1708 | 1788 | 7.50228730516 |
| NM_002754    | MAPK13 | 333  | 369  | 4.18035247922 |
| NM_002754    | MAPK13 | 559  | 639  | 5.76532171099 |
| NM_002754    | MAPK13 | 1788 | 1849 | 4.18035921005 |
| NM_002754    | MAPK13 | 1523 | 1653 | 5.76532171099 |
| NM_002754    | MAPK13 | 1285 | 1425 | 6.76532171099 |
| NM_002754    | MAPK13 | 1192 | 1273 | 5.76532171099 |
| NM_001099771 | POTEF  | 3636 | 3671 | 10.3780683599 |
| NM_001099771 | POTEF  | 2812 | 2900 | 10.8634951946 |
| NM_001099771 | POTEF  | 3053 | 3086 | 9.05614027257 |
| NM_001099771 | POTEF  | 3157 | 3186 | 8.05614003665 |
| NM_001099771 | POTEF  | 3211 | 3252 | 7.97200106319 |
| NM_001099771 | POTEF  | 3740 | 3805 | 10.6411027733 |
| NM_001099771 | POTEF  | 3528 | 3588 | 10.3780683675 |
| NM_001099771 | POTEF  | 3112 | 3154 | 9.05614027256 |
| NM_001099771 | POTEF  | 3326 | 3424 | 10.0561402726 |
| NM_002756    | MAP2K3 | 1435 | 1475 | 4.66653445792 |
| NM_002756    | MAP2K3 | 976  | 1040 | 5.67054532704 |
| NM_002756    | MAP2K3 | 1675 | 1766 | 6.2555145588  |
| NM_002756    | MAP2K3 | 112  | 216  | 6.67055205809 |



|           |           |      |      |                   |
|-----------|-----------|------|------|-------------------|
| NM_002756 | MAP2K3    | 597  | 687  | 6.25551455881     |
| NM_002756 | MAP2K3    | 870  | 938  | 4.67055182217     |
| NM_002756 | MAP2K3    | 397  | 507  | 6.99248015298     |
| NM_016039 | C14orf166 |      | 283  | 373 3.43784402766 |
| NM_016039 | C14orf166 |      | 130  | 198 5.75977212255 |
| NM_016039 | C14orf166 |      | 469  | 549 6.24519894972 |
| NM_016039 | C14orf166 |      | 837  | 911 4.43784402744 |
| NM_016039 | C14orf166 |      | 655  | 780 6.02280652838 |
| NM_016039 | C14orf166 |      | 375  | 469 5.02280652838 |
| NM_016038 | SBDS      | 944  | 1037 | 5.35547416411     |
| NM_016038 | SBDS      | 892  | 931  | 3.18554916244     |
| NM_016038 | SBDS      | 1224 | 1299 | 3.18554915511     |
| NM_016038 | SBDS      | 479  | 630  | 4.50747725755     |
| NM_016038 | SBDS      | 127  | 251  | 5.50747725755     |
| NM_016038 | SBDS      | 1349 | 1515 | 5.88598888081     |
| NM_016038 | SBDS      | 264  | 352  | 4.50747725755     |
| NM_016038 | SBDS      | 745  | 889  | 4.50747725755     |
| NM_016034 | MRPS2     | 788  | 841  | 8.07808469166     |
| NM_016034 | MRPS2     | 194  | 391  | 8.07808469166     |
| NM_016037 | UTP11L    | 1798 | 1828 | 4.07214741541     |
| NM_016037 | UTP11L    | 307  | 395  | 3.07616500803     |
| NM_016037 | UTP11L    | 1617 | 1706 | 3.07616501558     |
| NM_016030 | TTC15     | 319  | 355  | 6.34026929768     |
| NM_016030 | TTC15     | 856  | 914  | 7.34428666193     |
| NM_016030 | TTC15     | 1518 | 1574 | 6.34026929768     |
| NM_016032 | ZDHHC9    | 804  | 871  | 7.16625180763     |
| NM_016032 | ZDHHC9    | 2887 | 2989 | 6.58128929936     |
| NM_016032 | ZDHHC9    | 155  | 216  | 7.90321740179     |
| NM_016032 | ZDHHC9    | 2335 | 2380 | 7.90321740179     |
| NM_016032 | ZDHHC9    | 437  | 499  | 8.16625180763     |
| NM_016032 | ZDHHC9    | 1705 | 1771 | 7.16625180008     |
| NM_016032 | ZDHHC9    | 1271 | 1483 | 8.90321740179     |
| NM_016032 | ZDHHC9    | 1002 | 1249 | 10.1662518076     |
| NM_016032 | ZDHHC9    | 888  | 1000 | 7.90321740179     |
| NM_016032 | ZDHHC9    | 1839 | 1931 | 7.90321740179     |
| NM_016032 | ZDHHC9    | 2096 | 2327 | 9.38864422896     |
| NM_016032 | ZDHHC9    | 283  | 412  | 9.28172902505     |
| NM_016032 | ZDHHC9    | 550  | 715  | 8.75121430835     |
| NM_016032 | ZDHHC9    | 1538 | 1690 | 8.16625180763     |
| NM_015049 | TRAK2     | 867  | 939  | 6.44183369717     |
| NM_015048 | SETD1B    | 6112 | 6173 | 9.54679602436     |
| NM_015048 | SETD1B    | 8047 | 8114 | 10.1357693942     |
| NM_019590 | KIAA1217  |      | 2596 | 2654 6.6174274487 |
| NM_182739 | NDUFB6    | 397  | 460  | 5.44098107522     |
| NM_182739 | NDUFB6    | 234  | 280  | 5.43696347504     |
| NM_182739 | NDUFB6    | 40   | 125  | 5.44097434416     |
| NM_182739 | NDUFB6    | 179  | 233  | 3.85601833858     |
| NM_182739 | NDUFB6    | 512  | 550  | 3.77187936511     |
| NM_182739 | NDUFB6    | 320  | 370  | 5.44097434416     |
| NM_015040 | PIKFYVE   | 9113 | 9198 | 6.44935219477     |

|           |         |      |      |               |
|-----------|---------|------|------|---------------|
| NM_015040 | PIKFYVE | 1464 | 1601 | 9.03432142654 |
| NM_015040 | PIKFYVE | 6820 | 6893 | 6.4493586899  |
| NM_015043 | TBC1D9B | 469  | 522  | 6.2332021239  |
| NM_015043 | TBC1D9B | 2951 | 3004 | 6.81816486031 |
| NM_015043 | TBC1D9B | 3605 | 3688 | 6.81816486054 |
| NM_015043 | TBC1D9B | 685  | 726  | 5.14906315043 |
| NM_015043 | TBC1D9B | 1489 | 1519 | 6.2330286095  |
| NM_015043 | TBC1D9B | 2077 | 2127 | 6.14906315043 |
| NM_015043 | TBC1D9B | 30   | 66   | 5.22918475964 |
| NM_015043 | TBC1D9B | 2661 | 2732 | 5.23319562876 |
| NM_015043 | TBC1D9B | 4197 | 4262 | 7.5551304547  |
| NM_015043 | TBC1D9B | 4377 | 4425 | 5.23319562876 |
| NM_015043 | TBC1D9B | 2212 | 2277 | 5.2330286095  |
| NM_015043 | TBC1D9B | 3562 | 3605 | 5.22918475964 |
| NM_015043 | TBC1D9B | 3865 | 3921 | 5.2330286095  |
| NM_015043 | TBC1D9B | 236  | 325  | 7.5551304547  |
| NM_015043 | TBC1D9B | 541  | 655  | 6.81816486054 |
| NM_015043 | TBC1D9B | 3926 | 4023 | 6.23320235981 |
| NM_015043 | TBC1D9B | 1944 | 2020 | 5.23319562876 |
| NM_015042 | ZNF609  | 6312 | 6368 | 7.54882880921 |
| NM_015042 | ZNF609  | 4991 | 5036 | 6.46469633088 |
| NM_015042 | ZNF609  | 7606 | 7651 | 6.46469633088 |
| NM_015042 | ZNF609  | 7087 | 7142 | 6.46469633088 |
| NM_015042 | ZNF609  | 3492 | 3556 | 6.54481794009 |
| NM_015042 | ZNF609  | 85   | 175  | 7.54882880921 |
| NM_015042 | ZNF609  | 4246 | 4304 | 6.54481794009 |
| NM_015045 | WAPAL   | 2648 | 2734 | 5.10626769053 |
| NM_015045 | WAPAL   | 1710 | 1779 | 6.10626769808 |
| NM_015045 | WAPAL   | 788  | 839  | 4.02212848869 |
| NM_015045 | WAPAL   | 2310 | 2390 | 5.69105644848 |
| NM_015045 | WAPAL   | 4532 | 4604 | 5.02212848869 |
| NM_015045 | WAPAL   | 2570 | 2642 | 6.10626769808 |
| NM_015045 | WAPAL   | 3139 | 3187 | 5.10225009791 |
| NM_015045 | WAPAL   | 1312 | 1357 | 4.10225009791 |
| NM_015045 | WAPAL   | 3686 | 3756 | 5.10626746216 |
| NM_015045 | WAPAL   | 3933 | 3987 | 4.02212848869 |
| NM_015045 | WAPAL   | 2789 | 2837 | 5.10609394776 |
| NM_015045 | WAPAL   | 5905 | 5956 | 4.10626096702 |
| NM_015045 | WAPAL   | 3361 | 3407 | 4.10225009791 |
| NM_015045 | WAPAL   | 3436 | 3490 | 4.10626769053 |
| NM_015045 | WAPAL   | 5701 | 5778 | 4.10626096702 |
| NM_015045 | WAPAL   | 1110 | 1243 | 5.6912301988  |
| NM_015045 | WAPAL   | 2889 | 2959 | 4.10609394776 |
| NM_015044 | GGA2    | 610  | 672  | 7.62044655245 |
| NM_015044 | GGA2    | 1774 | 1850 | 5.62044631653 |
| NM_015044 | GGA2    | 288  | 367  | 6.62044655223 |
| NM_015044 | GGA2    | 4875 | 4976 | 5.6204465449  |
| NM_015044 | GGA2    | 1553 | 1599 | 6.53630734307 |
| NM_015044 | GGA2    | 3153 | 3237 | 7.62044655245 |
| NM_015044 | GGA2    | 190  | 260  | 8.20540905317 |

|           |          |      |      |               |               |
|-----------|----------|------|------|---------------|---------------|
| NM_015044 | GGA2     | 877  | 966  | 6.62044655245 |               |
| NM_015044 | GGA2     | 3273 | 3362 | 7.62044631653 |               |
| NM_015044 | GGA2     | 389  | 449  | 5.6204398214  |               |
| NM_015044 | GGA2     | 2508 | 2605 | 7.20540905317 |               |
| NM_015044 | GGA2     | 1506 | 1548 | 5.53630734307 |               |
| NM_015044 | GGA2     | 686  | 778  | 7.20540905317 |               |
| NM_015044 | GGA2     | 2128 | 2215 | 6.6204398214  |               |
| NM_015044 | GGA2     | 2780 | 2856 | 5.6204465449  |               |
| NM_015044 | GGA2     | 464  | 569  | 7.20540905317 |               |
| NM_015044 | GGA2     | 2985 | 3051 | 5.62027280214 |               |
| NM_015044 | GGA2     | 2709 | 2779 | 5.62044655245 |               |
| NM_015044 | GGA2     | 2003 | 2101 | 7.62044655245 |               |
| NM_015044 | GGA2     | 2269 | 2368 | 8.42780147451 |               |
| NM_015044 | GGA2     | 1664 | 1762 | 7.201391453   |               |
| NM_015044 | GGA2     | 1275 | 1386 | 6.62044655245 |               |
| NM_015044 | GGA2     | 1123 | 1275 | 8.42780147451 |               |
| NM_015044 | GGA2     | 3563 | 3643 | 5.62044631653 |               |
| NM_015047 | KIAA0090 |      | 1592 | 1668          | 7.39900880474 |
| NM_015047 | KIAA0090 |      | 1807 | 1889          | 7.13597439891 |
| NM_015047 | KIAA0090 |      | 2376 | 2456          | 7.13597439891 |
| NM_015047 | KIAA0090 |      | 151  | 247           | 7.13597439891 |
| NM_015047 | KIAA0090 |      | 1036 | 1080          | 5.8140463038  |
| NM_015047 | KIAA0090 |      | 2608 | 2687          | 6.81404630402 |
| NM_015047 | KIAA0090 |      | 2877 | 2948          | 7.39900880474 |
| NM_015047 | KIAA0090 |      | 499  | 551           | 6.81002870385 |
| NM_015047 | KIAA0090 |      | 3474 | 3533          | 4.8140460681  |
| NM_015047 | KIAA0090 |      | 2456 | 2496          | 4.81002870385 |
| NM_015047 | KIAA0090 |      | 2704 | 2771          | 5.81403957297 |
| NM_015047 | KIAA0090 |      | 3226 | 3270          | 6.31486959536 |
| NM_015047 | KIAA0090 |      | 898  | 1022          | 7.98397130546 |
| NM_015047 | KIAA0090 |      | 1674 | 1804          | 8.39900880474 |
| NM_015047 | KIAA0090 |      | 42   | 150           | 7.98397130546 |
| NM_015047 | KIAA0090 |      | 3383 | 3460          | 8.13597439891 |
| NM_015047 | KIAA0090 |      | 293  | 491           | 8.72093689963 |
| NM_015047 | KIAA0090 |      | 2301 | 2373          | 6.39900879719 |
| NM_015047 | KIAA0090 |      | 584  | 876           | 9.13597439891 |
| NM_015047 | KIAA0090 |      | 1175 | 1394          | 8.51448602216 |
| NM_015047 | KIAA0090 |      | 1927 | 2296          | 9.39900880474 |
| NM_015047 | KIAA0090 |      | 1402 | 1585          | 7.62140122608 |
| NM_015047 | KIAA0090 |      | 3298 | 3375          | 6.39900880474 |
| NM_015047 | KIAA0090 |      | 2978 | 3218          | 8.39900880474 |
| NM_015047 | KIAA0090 |      | 3612 | 3679          | 6.39900856882 |
| NM_015047 | KIAA0090 |      | 1088 | 1174          | 7.81404630402 |
| NM_015046 | SETX     | 904  | 966  | 6.96379410157 |               |
| NM_015046 | SETX     | 2466 | 2508 | 6.95978323245 |               |
| NM_015046 | SETX     | 114  | 175  | 7.54876333334 |               |
| NM_015046 | SETX     | 3594 | 3645 | 6.87966162324 |               |
| NM_015046 | SETX     | 9430 | 9486 | 6.95978323245 |               |
| NM_015046 | SETX     | 1737 | 1808 | 6.95978323245 |               |
| NM_015046 | SETX     | 9023 | 9067 | 5.87966162324 |               |

|              |        |      |      |                |
|--------------|--------|------|------|----------------|
| NM_015046    | SETX   | 7671 | 7745 | 5.96379410157  |
| NM_015046    | SETX   | 674  | 732  | 6.95978323245  |
| NM_015046    | SETX   | 4975 | 5038 | 5.95978323245  |
| NM_000018    | ACADVL | 1211 | 1246 | 3.44619337844  |
| NM_000018    | ACADVL | 753  | 806  | 5.03115587916  |
| NM_000018    | ACADVL | 1168 | 1209 | 3.44601986404  |
| NM_000018    | ACADVL | 1107 | 1157 | 3.36205440498  |
| NM_000018    | ACADVL | 1411 | 1640 | 8.5754766313   |
| NM_000018    | ACADVL | 610  | 735  | 4.44619361436  |
| NM_000018    | ACADVL | 449  | 594  | 6.44619361436  |
| NM_000018    | ACADVL | 1678 | 1850 | 6.6161186158   |
| NM_000018    | ACADVL | 270  | 448  | 5.76812170925  |
| NM_000018    | ACADVL | 1879 | 2065 | 6.44619361436  |
| NM_000018    | ACADVL | 1266 | 1408 | 6.44619361436  |
| NM_000018    | ACADVL | 810  | 948  | 5.76812170925  |
| NM_004060    | CCNG1  | 124  | 199  | 1.9757373943   |
| NM_004060    | CCNG1  | 755  | 794  | 1.97975498693  |
| NM_004060    | CCNG1  | 1015 | 1115 | 4.30168308936  |
| NM_004060    | CCNG1  | 493  | 608  | 3.56471748765  |
| NM_004060    | CCNG1  | 610  | 753  | 4.97975499448  |
| NM_004060    | CCNG1  | 204  | 491  | 6.22768250792  |
| NM_004060    | CCNG1  | 888  | 987  | 4.30168308936  |
| NM_004060    | CCNG1  | 1129 | 1218 | 3.97975499448  |
| NM_006473    | TAF6L  | 1284 | 1325 | 8.68247841315  |
| NM_006473    | TAF6L  | 685  | 779  | 9.68247191802  |
| NM_001015    | RPS11  | 546  | 607  | 0.596141967019 |
| NM_001015    | RPS11  | 32   | 509  | 5.26856730899  |
| NM_018262    | IFT122 | 1227 | 1288 | 8.41364139139  |
| NM_001018161 | PON2   | 1467 | 1540 | 7.8123129587   |
| NM_001018161 | PON2   | 1397 | 1466 | 6.91922816262  |
| NM_001018161 | PON2   | 847  | 1397 | 10.177962431   |
| NM_001018161 | PON2   | 132  | 453  | 9.281798242    |
| NM_001018161 | PON2   | 460  | 844  | 9.53813799526  |
| NM_003897    | IER3   | 580  | 654  | 4.57339688874  |
| NM_003897    | IER3   | 123  | 156  | 2.9882606377   |
| NM_003897    | IER3   | 3    | 67   | 3.98843438802  |
| NM_003897    | IER3   | 252  | 325  | 4.98843438802  |
| NM_003897    | IER3   | 1057 | 1103 | 2.9884341521   |
| NM_003897    | IER3   | 1147 | 1252 | 4.57339688874  |
| NM_003897    | IER3   | 386  | 537  | 6.68887410616  |
| NM_003897    | IER3   | 834  | 1003 | 4.98843438802  |
| NM_003897    | IER3   | 760  | 829  | 4.57339688873  |
| NM_030882    | APOL2  | 442  | 520  | 4.69700306576  |
| NM_203304    | MEX3D  | 2503 | 2592 | 12.2786675183  |
| NM_203304    | MEX3D  | 1336 | 1412 | 11.2786675183  |
| NM_203304    | MEX3D  | 561  | 600  | 9.19452830887  |
| NM_203304    | MEX3D  | 958  | 985  | 9.2786607872   |
| NM_203304    | MEX3D  | 1849 | 1895 | 10.2786675107  |
| NM_203304    | MEX3D  | 897  | 932  | 9.19452830887  |
| NM_203304    | MEX3D  | 1068 | 1119 | 10.2746499181  |

|           |          |      |      |                   |
|-----------|----------|------|------|-------------------|
| NM_203304 | MEX3D    | 2297 | 2389 | 11.2786675183     |
| NM_203304 | MEX3D    | 669  | 730  | 10.2786675183     |
| NM_203304 | MEX3D    | 2608 | 2688 | 10.2786675183     |
| NM_018263 | ASXL2    | 3333 | 3406 | 6.39261910385     |
| NM_018263 | ASXL2    | 525  | 581  | 5.3964629537      |
| NM_018263 | ASXL2    | 1276 | 1380 | 6.39261910385     |
| NM_018263 | ASXL2    | 6478 | 6537 | 6.31249749464     |
| NM_006479 | RAD51AP1 |      | 162  | 258 6.60884454593 |
| NM_194356 | STX2     | 2529 | 2605 | 4.24378294547     |
| NM_194356 | STX2     | 508  | 556  | 4.16366133626     |
| NM_003893 | LDB1     | 1217 | 1290 | 8.71531197234     |
| NM_003893 | LDB1     | 1061 | 1164 | 7.39338387745     |
| NM_003893 | LDB1     | 1589 | 1622 | 6.38936627728     |
| NM_003893 | LDB1     | 810  | 913  | 8.71531197234     |
| NM_003893 | LDB1     | 1995 | 2050 | 7.39338387723     |
| NM_003893 | LDB1     | 723  | 807  | 6.39338387745     |
| NM_007269 | STXBP3   | 270  | 356  | 7.33168336796     |
| NM_007269 | STXBP3   | 1995 | 2054 | 5.74287701738     |
| NM_007269 | STXBP3   | 1654 | 1719 | 7.33185038722     |
| NM_007269 | STXBP3   | 1127 | 1221 | 7.33185711805     |
| NM_001560 | IL13RA1  | 919  | 977  | 6.18989339141     |
| NM_001560 | IL13RA1  | 2565 | 2613 | 5.77485589213     |
| NM_001560 | IL13RA1  | 385  | 493  | 6.99724831347     |
| NM_001560 | IL13RA1  | 1568 | 1604 | 5.18587579124     |
| NM_001560 | IL13RA1  | 1822 | 1869 | 5.18587579124     |
| NM_001560 | IL13RA1  | 29   | 80   | 4.18587579124     |
| NM_001560 | IL13RA1  | 984  | 1061 | 6.18989339141     |
| NM_001560 | IL13RA1  | 566  | 675  | 6.18989339141     |
| NM_001560 | IL13RA1  | 1712 | 1815 | 6.5118214863      |
| NM_001560 | IL13RA1  | 2361 | 2441 | 5.18988666036     |
| NM_001560 | IL13RA1  | 1195 | 1329 | 6.18989339141     |
| NM_001560 | IL13RA1  | 803  | 874  | 4.18989339141     |
| NM_001560 | IL13RA1  | 128  | 370  | 8.09678398702     |
| NM_001567 | INPPL1   | 1614 | 1665 | 7.69382535855     |
| NM_001567 | INPPL1   | 1925 | 1996 | 7.61370374934     |
| NM_004046 | ATP5A1   | 161  | 200  | 2.66368458646     |
| NM_004046 | ATP5A1   | 1631 | 1812 | 6.0560087403      |
| NM_004046 | ATP5A1   | 203  | 1628 | 9.54633436688     |
| NM_004045 | ATOX1    | 156  | 274  | 6.89633172516     |
| NM_004044 | ATIC     | 875  | 973  | 4.91523301921     |
| NM_004044 | ATIC     | 1641 | 1766 | 4.06723611265     |
| NM_004044 | ATIC     | 1777 | 1863 | 2.74530801776     |
| NM_004044 | ATIC     | 671  | 720  | 1.74530128671     |
| NM_004044 | ATIC     | 421  | 467  | 2.74530801021     |
| NM_004044 | ATIC     | 317  | 415  | 4.91523301921     |
| NM_004044 | ATIC     | 595  | 669  | 3.33027051849     |
| NM_004044 | ATIC     | 468  | 590  | 4.33027051849     |
| NM_004044 | ATIC     | 727  | 798  | 1.74530128671     |
| NM_004044 | ATIC     | 185  | 312  | 5.83277085901     |
| NM_004044 | ATIC     | 1296 | 1409 | 4.33027051849     |

|           |        |      |      |               |
|-----------|--------|------|------|---------------|
| NM_004044 | ATIC   | 1875 | 2043 | 5.2047396364  |
| NM_004044 | ATIC   | 1447 | 1595 | 4.06723611265 |
| NM_004044 | ATIC   | 1032 | 1193 | 5.06723611265 |
| NM_004048 | B2M    | 30   | 946  | 10.2915506181 |
| NM_133635 | POFUT2 | 206  | 262  | 6.47456935705 |
| NM_133635 | POFUT2 | 2775 | 2836 | 6.4745693495  |
| NM_133635 | POFUT2 | 445  | 491  | 4.88558925616 |
| NM_133635 | POFUT2 | 491  | 566  | 4.88960012528 |
| NM_133635 | POFUT2 | 2616 | 2732 | 7.47456912113 |
| NM_133635 | POFUT2 | 2204 | 2264 | 4.80546764695 |
| NM_133635 | POFUT2 | 786  | 855  | 6.47055175688 |
| NM_133635 | POFUT2 | 1110 | 1293 | 6.88960685633 |
| NM_133325 | PHF10  | 537  | 565  | 3.69516663806 |
| NM_133325 | PHF10  | 1118 | 1170 | 3.61504502885 |
| NM_133325 | PHF10  | 1202 | 1268 | 5.28414673141 |
| NM_133325 | PHF10  | 1453 | 1513 | 3.69917750718 |
| NM_133325 | PHF10  | 210  | 290  | 3.69917750718 |
| NM_133325 | PHF10  | 961  | 1061 | 5.69918423823 |
| NM_007247 | SYNRG  | 1441 | 1514 | 8.69436379527 |
| NM_007247 | SYNRG  | 435  | 491  | 8.10923427528 |
| NM_007247 | SYNRG  | 3536 | 3640 | 8.69436379527 |
| NM_007247 | SYNRG  | 3932 | 3993 | 8.02526881622 |
| NM_007247 | SYNRG  | 4224 | 4287 | 7.02526881622 |
| NM_007247 | SYNRG  | 785  | 845  | 7.10539042543 |
| NM_007247 | SYNRG  | 7436 | 7493 | 7.10539042543 |
| NM_133631 | ROB01  | 2683 | 2734 | 4.92549831787 |
| NM_133631 | ROB01  | 4607 | 4722 | 4.92549831809 |
| NM_133631 | ROB01  | 768  | 882  | 7.24742641298 |
| NM_133631 | ROB01  | 4783 | 4874 | 5.92549831809 |
| NM_133631 | ROB01  | 6727 | 6783 | 6.24742641298 |
| NM_133631 | ROB01  | 3229 | 3321 | 6.51046081881 |
| NM_133631 | ROB01  | 6806 | 6851 | 5.51045408776 |
| NM_133631 | ROB01  | 5447 | 5518 | 5.92549831809 |
| NM_133631 | ROB01  | 2216 | 2254 | 3.92549831054 |
| NM_133631 | ROB01  | 2258 | 2329 | 5.92549831809 |
| NM_133631 | ROB01  | 2623 | 2672 | 3.92549831787 |
| NM_133631 | ROB01  | 7084 | 7137 | 5.50644321864 |
| NM_133631 | ROB01  | 5526 | 5560 | 3.92148071792 |
| NM_133631 | ROB01  | 3909 | 4021 | 7.62593803623 |
| NM_133631 | ROB01  | 3476 | 3554 | 3.92549831787 |
| NM_133631 | ROB01  | 5618 | 5665 | 4.92148071792 |
| NM_133631 | ROB01  | 4886 | 4952 | 4.92532456777 |
| NM_133631 | ROB01  | 685  | 764  | 6.92549831809 |
| NM_133631 | ROB01  | 5346 | 5446 | 5.51046081881 |
| NM_133631 | ROB01  | 6458 | 6579 | 5.92549831809 |
| NM_133631 | ROB01  | 905  | 1168 | 8.38492993673 |
| NM_133631 | ROB01  | 1865 | 2031 | 7.92549831809 |
| NM_133631 | ROB01  | 4053 | 4194 | 3.92549831809 |
| NM_133631 | ROB01  | 1180 | 1493 | 8.92549831809 |
| NM_133631 | ROB01  | 3322 | 3388 | 6.92549831809 |

|           |       |      |      |               |
|-----------|-------|------|------|---------------|
| NM_133631 | ROB01 | 5686 | 5855 | 6.51046081881 |
| NM_133631 | ROB01 | 1493 | 1789 | 8.01296115934 |
| NM_133631 | ROB01 | 4194 | 4264 | 5.51046081881 |
| NM_133631 | ROB01 | 3392 | 3476 | 5.92549831809 |
| NM_133631 | ROB01 | 5097 | 5163 | 5.51046081126 |
| NM_133631 | ROB01 | 3590 | 3790 | 7.51046081881 |
| NM_133631 | ROB01 | 2934 | 3134 | 7.92549831809 |
| NM_133631 | ROB01 | 2344 | 2464 | 6.24742641298 |
| NM_133631 | ROB01 | 6873 | 6975 | 5.51046081881 |
| NM_133631 | ROB01 | 4431 | 4489 | 4.92549831787 |
| NM_133631 | ROB01 | 6021 | 6099 | 4.92549158704 |
| NM_133631 | ROB01 | 2086 | 2190 | 5.51046081881 |
| NM_133631 | ROB01 | 2492 | 2622 | 6.24742641298 |
| NM_133631 | ROB01 | 442  | 587  | 6.24742641298 |
| NM_133631 | ROB01 | 3796 | 3872 | 3.92549158704 |
| NM_133631 | ROB01 | 4973 | 5078 | 7.24742641298 |
| NM_007241 | SNF8  | 364  | 441  | 6.16757468204 |
| NM_007241 | SNF8  | 116  | 209  | 5.84564658715 |
| NM_007241 | SNF8  | 225  | 364  | 6.84564658715 |
| NM_007241 | SNF8  | 504  | 611  | 6.43060908787 |
| NM_000214 | JAG1  | 3718 | 3790 | 6.25165346018 |
| NM_000214 | JAG1  | 2692 | 2765 | 5.76622663301 |
| NM_000214 | JAG1  | 3909 | 4007 | 5.44429853812 |
| NM_000214 | JAG1  | 4223 | 4297 | 6.25165346018 |
| NM_000214 | JAG1  | 2786 | 2836 | 3.4442983022  |
| NM_000214 | JAG1  | 2132 | 2239 | 5.44429853812 |
| NM_000214 | JAG1  | 4298 | 4357 | 3.4442983022  |
| NM_000214 | JAG1  | 594  | 680  | 6.02926103884 |
| NM_000214 | JAG1  | 2996 | 3053 | 4.4442985379  |
| NM_000214 | JAG1  | 359  | 388  | 4.36015932874 |
| NM_000214 | JAG1  | 2048 | 2118 | 5.76622663301 |
| NM_000214 | JAG1  | 1314 | 1481 | 6.44429853812 |
| NM_000214 | JAG1  | 1885 | 1977 | 5.44429853812 |
| NM_000214 | JAG1  | 5291 | 5363 | 3.44412478781 |
| NM_000214 | JAG1  | 295  | 340  | 5.02524343867 |
| NM_000214 | JAG1  | 2845 | 2932 | 6.25165346018 |
| NM_000214 | JAG1  | 903  | 999  | 5.02926103884 |
| NM_000214 | JAG1  | 2281 | 2397 | 5.76622663301 |
| NM_000214 | JAG1  | 4663 | 4724 | 4.44412478781 |
| NM_000214 | JAG1  | 2397 | 2605 | 7.61422353957 |
| NM_000214 | JAG1  | 1499 | 1884 | 7.8366159609  |
| NM_000214 | JAG1  | 3318 | 3667 | 7.44429853812 |
| NM_000214 | JAG1  | 4514 | 4617 | 4.44429853812 |
| NM_000214 | JAG1  | 999  | 1153 | 6.02926103884 |
| NM_000214 | JAG1  | 1172 | 1270 | 4.44429853812 |
| NM_000214 | JAG1  | 3111 | 3207 | 5.44429853812 |
| NM_007243 | NRM   | 940  | 977  | 10.8480110794 |
| NM_007243 | NRM   | 1381 | 1418 | 10.8481780987 |
| NM_007243 | NRM   | 792  | 861  | 11.263222329  |
| NM_007243 | NRM   | 979  | 1055 | 10.2592047289 |

|              |        |      |      |                 |
|--------------|--------|------|------|-----------------|
| NM_007243    | NRM    | 341  | 429  | 10.263222329    |
| NM_007243    | NRM    | 1527 | 1584 | 9.25920472887   |
| NM_007243    | NRM    | 862  | 939  | 10.8480110794   |
| NM_007243    | NRM    | 1235 | 1368 | 12.263222329    |
| NM_000942    | PPIB   | 136  | 301  | 3.66705566294   |
| NM_000942    | PPIB   | 301  | 1022 | 6.12648728158   |
| NM_000968    | RPL4   | 1138 | 1256 | 1.28771579285   |
| NM_000968    | RPL4   | 1100 | 1133 | -0.712457957466 |
| NM_000968    | RPL4   | 696  | 898  | 4.5356433063    |
| NM_000968    | RPL4   | 1258 | 1309 | -0.796423416532 |
| NM_000968    | RPL4   | 13   | 209  | 3.93157198263   |
| NM_000968    | RPL4   | 914  | 1076 | 2.60964388774   |
| NM_000968    | RPL4   | 469  | 647  | 2.98815551099   |
| NM_000968    | RPL4   | 216  | 465  | 4.19460638846   |
| NM_000968    | RPL4   | 1309 | 1434 | 2.09507071491   |
| NM_000969    | RPL5   | 603  | 805  | 2.00939036102   |
| NM_000969    | RPL5   | 511  | 593  | 1.17931536247   |
| NM_000969    | RPL5   | 805  | 990  | 0.594352861744  |
| NM_000969    | RPL5   | 31   | 489  | 3.43565511572   |
| NM_001024916 | CBWD5  | 284  | 391  | 6.88553958418   |
| NM_001024916 | CBWD5  | 882  | 967  | 7.30057708345   |
| NM_001024916 | CBWD5  | 518  | 568  | 6.88553285312   |
| NM_001024916 | CBWD5  | 716  | 763  | 5.30057708323   |
| NM_001024916 | CBWD5  | 407  | 472  | 6.88553958395   |
| NM_001024916 | CBWD5  | 113  | 261  | 8.30057708345   |
| NM_017789    | SEMA4C | 1657 | 1700 | 8.71244852826   |
| NM_017789    | SEMA4C | 284  | 352  | 7.71645939738   |
| NM_017789    | SEMA4C | 583  | 629  | 7.71244852826   |
| NM_017789    | SEMA4C | 1422 | 1473 | 8.71629237811   |
| NM_017789    | SEMA4C | 2938 | 2988 | 7.71646612821   |
| NM_017789    | SEMA4C | 1727 | 1808 | 9.71646612843   |
| NM_001142443 | EDC3   | 1359 | 1418 | 9.4537487178    |
| NM_001142443 | EDC3   | 2282 | 2346 | 7.86877972195   |
| NM_001142443 | EDC3   | 3340 | 3414 | 7.86476885283   |
| NM_001142443 | EDC3   | 2070 | 2098 | 9.36960974434   |
| NM_001142443 | EDC3   | 550  | 630  | 7.86476885283   |
| NM_000765    | CYP3A7 | 1591 | 1658 | 9.61748922298   |
| NM_000765    | CYP3A7 | 1751 | 1799 | 10.6174959538   |
| NM_000765    | CYP3A7 | 1217 | 1275 | 8.53335674465   |
| NM_000765    | CYP3A7 | 547  | 607  | 9.53335674465   |
| NM_000765    | CYP3A7 | 167  | 253  | 10.2022847044   |
| NM_000765    | CYP3A7 | 82   | 135  | 8.61347835386   |
| NM_017780    | CHD7   | 4016 | 4085 | 7.35543188166   |
| NM_017780    | CHD7   | 6767 | 6818 | 6.77064313103   |
| NM_017780    | CHD7   | 8915 | 8985 | 6.76662553108   |
| NM_017780    | CHD7   | 449  | 515  | 5.77064313125   |
| NM_017780    | CHD7   | 9921 | 9977 | 7.35543188166   |
| NM_017780    | CHD7   | 1360 | 1389 | 5.76662553108   |
| NM_017780    | CHD7   | 8372 | 8431 | 6.7706364002    |
| NM_017780    | CHD7   | 702  | 816  | 5.77064313125   |



|              |         |      |      |               |
|--------------|---------|------|------|---------------|
| NM_017780    | CHD7    | 3739 | 3799 | 7.3515880318  |
| NM_017780    | CHD7    | 4617 | 4717 | 5.7706364002  |
| NM_017780    | CHD7    | 363  | 429  | 6.77046938094 |
| NM_017780    | CHD7    | 8201 | 8289 | 7.77064313126 |
| NM_017780    | CHD7    | 5308 | 5399 | 6.7706364002  |
| NM_017780    | CHD7    | 4884 | 4968 | 5.77046938094 |
| NM_017780    | CHD7    | 3803 | 3940 | 7.77064313126 |
| NM_017780    | CHD7    | 9079 | 9149 | 5.7706364002  |
| NM_017781    | CYP2W1  | 990  | 1033 | 8.19388172941 |
| NM_017781    | CYP2W1  | 104  | 153  | 9.19789909366 |
| NM_017781    | CYP2W1  | 1925 | 2001 | 8.11376012019 |
| NM_017781    | CYP2W1  | 446  | 502  | 9.7828618303  |
| NM_017781    | CYP2W1  | 1223 | 1305 | 8.19789932203 |
| NM_017781    | CYP2W1  | 507  | 618  | 9.19789932957 |
| NM_017782    | FAM208B | 7678 | 7766 | 8.55115802308 |
| NM_017782    | FAM208B | 4163 | 4244 | 8.55115802308 |
| NM_017782    | FAM208B | 2156 | 2225 | 7.55115802307 |
| NM_017782    | FAM208B | 7547 | 7625 | 6.55115129203 |
| NM_017782    | FAM208B | 1397 | 1475 | 8.13611379275 |
| NM_017782    | FAM208B | 8085 | 8133 | 8.13612028788 |
| NM_017782    | FAM208B | 4631 | 4696 | 7.55115129203 |
| NM_017782    | FAM208B | 6662 | 6719 | 6.55115778716 |
| NM_017782    | FAM208B | 6288 | 6352 | 6.55115801553 |
| NM_017782    | FAM208B | 2535 | 2601 | 7.55115802308 |
| NM_017782    | FAM208B | 3591 | 3654 | 8.55115129203 |
| NM_017782    | FAM208B | 5826 | 5878 | 8.13612028788 |
| NM_017782    | FAM208B | 524  | 612  | 8.1361205238  |
| NM_017782    | FAM208B | 6538 | 6575 | 8.13210292363 |
| NM_017782    | FAM208B | 6977 | 7107 | 8.1361205238  |
| NM_017782    | FAM208B | 1489 | 1589 | 8.87308611797 |
| NM_017782    | FAM208B | 4754 | 4856 | 6.55115802308 |
| NM_017782    | FAM208B | 5364 | 5406 | 6.54714042291 |
| NM_017782    | FAM208B | 6837 | 6899 | 6.55098427276 |
| NM_017782    | FAM208B | 5044 | 5089 | 6.54714042291 |
| NM_017782    | FAM208B | 1260 | 1324 | 7.55098427276 |
| NM_017782    | FAM208B | 3227 | 3305 | 8.1361205238  |
| NM_017782    | FAM208B | 5961 | 6006 | 7.55115801553 |
| NM_017782    | FAM208B | 3103 | 3218 | 9.1361205238  |
| NM_017782    | FAM208B | 2248 | 2317 | 8.87308611797 |
| NM_017782    | FAM208B | 4565 | 4613 | 6.54714042291 |
| NM_017782    | FAM208B | 2793 | 2859 | 8.1361205238  |
| NM_017782    | FAM208B | 3745 | 3849 | 6.55115801553 |
| NM_017782    | FAM208B | 2926 | 3037 | 9.35851294514 |
| NM_017782    | FAM208B | 6080 | 6279 | 9.35851294514 |
| NM_017782    | FAM208B | 7433 | 7522 | 8.1361205238  |
| NM_001042678 | RHOC    | 769  | 811  | 5.5148121493  |
| NM_001042678 | RHOC    | 878  | 933  | 3.51481192093 |
| NM_001042678 | RHOC    | 521  | 604  | 6.51481215685 |
| NM_001042678 | RHOC    | 669  | 725  | 4.51481215685 |
| NM_001042678 | RHOC    | 332  | 520  | 6.51481215685 |

|              |          |      |      |               |               |
|--------------|----------|------|------|---------------|---------------|
| NM_199334    | THRA     | 1274 | 1329 | 6.32282079925 |               |
| NM_199334    | THRA     | 920  | 972  | 7.23885534018 |               |
| NM_199337    | TMEM179B |      | 81   | 179           | 9.46473678323 |
| NM_199337    | TMEM179B |      | 537  | 699           | 11.4647367832 |
| NM_199337    | TMEM179B |      | 248  | 462           | 12.2720917053 |
| NM_001198665 | ARHGEF12 |      | 2721 | 2775          | 4.0473664785  |
| NM_001198665 | ARHGEF12 |      | 5180 | 5234          | 4.13133193756 |
| NM_001198665 | ARHGEF12 |      | 3605 | 3679          | 5.13149895683 |
| NM_001198665 | ARHGEF12 |      | 507  | 545           | 4.12748808771 |
| NM_001198665 | ARHGEF12 |      | 26   | 125           | 7.13150568788 |
| NM_001198665 | ARHGEF12 |      | 385  | 437           | 5.13149895683 |
| NM_001198665 | ARHGEF12 |      | 6612 | 6671          | 5.71646795268 |
| NM_001198665 | ARHGEF12 |      | 178  | 258           | 6.13150568788 |
| NM_001198665 | ARHGEF12 |      | 1461 | 1550          | 5.71646818105 |
| NM_001198665 | ARHGEF12 |      | 3817 | 3861          | 4.13149895683 |
| NM_001198665 | ARHGEF12 |      | 2985 | 3082          | 5.7164681886  |
| NM_001198665 | ARHGEF12 |      | 7895 | 7940          | 5.12748808771 |
| NM_001198665 | ARHGEF12 |      | 2478 | 2576          | 5.13150568033 |
| NM_001198665 | ARHGEF12 |      | 1818 | 1927          | 5.7164681886  |
| NM_001198665 | ARHGEF12 |      | 7560 | 7665          | 5.7164681886  |
| NM_001198665 | ARHGEF12 |      | 6789 | 6835          | 5.0473664785  |
| NM_001198665 | ARHGEF12 |      | 3383 | 3487          | 6.45343378276 |
| NM_001198665 | ARHGEF12 |      | 2800 | 2861          | 4.12748808771 |
| NM_001198664 | GNG10    | 231  | 294  | 7.67162543043 |               |
| NM_018115    | SDAD1    | 758  | 857  | 4.06399959094 |               |
| NM_018115    | SDAD1    | 2071 | 2091 | 4.05998872182 |               |
| NM_018115    | SDAD1    | 1225 | 1302 | 5.06399959094 |               |
| NM_001083961 | WDR62    | 4677 | 4719 | 8.85282892756 |               |
| NM_001083961 | WDR62    | 3278 | 3360 | 8.93696813694 |               |
| NM_001083961 | WDR62    | 2250 | 2288 | 10.5219304017 |               |
| NM_001083961 | WDR62    | 1167 | 1249 | 9.93696813694 |               |
| NM_001083961 | WDR62    | 376  | 522  | 8.93696813694 |               |
| NM_001083961 | WDR62    | 600  | 676  | 11.744323059  |               |
| NM_001083961 | WDR62    | 1349 | 1459 | 10.5219306377 |               |
| NM_001083961 | WDR62    | 203  | 291  | 8.93696813672 |               |
| NM_001083961 | WDR62    | 1748 | 1817 | 8.93696140589 |               |
| NM_001083961 | WDR62    | 4032 | 4126 | 8.93696813672 |               |
| NM_007224    | NXPH4    | 1711 | 1796 | 12.5404262812 |               |
| NM_007224    | NXPH4    | 1163 | 1226 | 11.9554702756 |               |
| NM_007224    | NXPH4    | 168  | 218  | 12.9554705115 |               |
| NM_007224    | NXPH4    | 988  | 1080 | 13.2773986064 |               |
| NM_007224    | NXPH4    | 482  | 620  | 12.9554705115 |               |
| NM_007224    | NXPH4    | 1082 | 1132 | 10.8713313021 |               |
| NM_007224    | NXPH4    | 1451 | 1634 | 12.5404330122 |               |
| NM_020651    | PELI1    | 1461 | 1486 | 5.03962063983 |               |
| NM_020651    | PELI1    | 708  | 849  | 7.4456879441  |               |
| NM_020652    | ZNF286A  | 2889 | 2947 | 9.32023164704 |               |
| NM_001031801 | LIMK2    | 1233 | 1283 | 6.2111103497  |               |
| NM_001031801 | LIMK2    | 440  | 485  | 7.29524932316 |               |
| NM_001031801 | LIMK2    | 2181 | 2232 | 7.88021182388 |               |

|              |              |      |      |               |               |
|--------------|--------------|------|------|---------------|---------------|
| NM_001031801 | LIMK2        | 2302 | 2349 | 6.29524955908 |               |
| NM_001031801 | LIMK2        | 1841 | 1874 | 6.29524282803 |               |
| NM_001031801 | LIMK2        | 2250 | 2293 | 7.87619445963 |               |
| NM_001031801 | LIMK2        | 1505 | 1570 | 6.29507580876 |               |
| NM_001031801 | LIMK2        | 1885 | 1980 | 7.8802120598  |               |
| NM_001080432 | FTO          | 1212 | 1317 | 7.80342135382 |               |
| NM_001080435 | WHAMM        | 3458 | 3605 | 8.25928606161 |               |
| NM_004202    | TMSB4Y       | 786  | 833  | 8.16669131868 |               |
| NM_024939    | ESRP2        | 2949 | 3009 | 7.36136221016 |               |
| NM_024939    | ESRP2        | 961  | 998  | 8.36136221016 |               |
| NM_024939    | ESRP2        | 1424 | 1494 | 8.95033558    |               |
| NM_173659    | RPUSD3       | 510  | 556  | 7.93020718549 |               |
| NM_173659    | RPUSD3       | 1098 | 1178 | 8.0103287947  |               |
| NM_173659    | RPUSD3       | 365  | 437  | 9.0103287947  |               |
| NM_017567    | NAGK         | 449  | 494  | 7.61130693108 |               |
| NM_017567    | NAGK         | 988  | 1081 | 7.69543940941 |               |
| NM_173657    | C3orf33      | 372  | 442  | 6.91946774012 |               |
| NM_173657    | C3orf33      | 488  | 530  | 6.91946124499 |               |
| NM_173654    | C3orf64      | 1718 | 1809 | 10.9553350281 |               |
| NM_173654    | C3orf64      | 568  | 666  | 8.9513174279  |               |
| NM_173654    | C3orf64      | 2482 | 2557 | 8.95533502808 |               |
| XM_003118719 | LOC100507607 |      | 123  | 190           | 8.19474928278 |
| XM_003118719 | LOC100507607 |      | 1161 | 1217          | 9.19474928278 |
| XM_003118719 | LOC100507607 |      | 244  | 319           | 9.19474928278 |
| XM_003118719 | LOC100507607 |      | 1060 | 1115          | 8.19474927523 |
| XM_003118719 | LOC100507607 |      | 449  | 483           | 8.19073168261 |
| XM_003118719 | LOC100507607 |      | 350  | 408           | 9.77971177595 |
| XM_003118719 | LOC100507607 |      | 806  | 904           | 9.19474928278 |
| NM_001145293 | NGLY1        | 994  | 1041 | 3.46667119639 |               |
| NM_001145293 | NGLY1        | 657  | 725  | 3.5467928056  |               |
| NM_001145293 | NGLY1        | 387  | 482  | 4.55063665546 |               |
| NM_001201326 | PDZK1        | 1040 | 1138 | 5.45044557709 |               |
| NM_001201326 | PDZK1        | 1638 | 1696 | 3.45045230815 |               |
| NM_001201326 | PDZK1        | 92   | 135  | 3.45044557709 |               |
| NM_001201326 | PDZK1        | 1293 | 1435 | 6.45045230815 |               |
| NM_001201326 | PDZK1        | 1444 | 1498 | 5.4504523006  |               |
| NM_001201326 | PDZK1        | 1548 | 1619 | 5.03541480887 |               |
| NM_001201326 | PDZK1        | 235  | 427  | 6.90988392678 |               |
| NM_001201326 | PDZK1        | 920  | 1021 | 3.45045230814 |               |
| NM_001201326 | PDZK1        | 548  | 767  | 6.62037730959 |               |
| NM_001018005 | TPM1         | 704  | 748  | 3.09722067039 |               |
| NM_001100625 | CENPN        | 755  | 824  | 8.29382334296 |               |
| NM_001100625 | CENPN        | 832  | 943  | 10.6157581689 |               |
| NM_001100626 | ERLIN1       | 2160 | 2227 | 2.41530054316 |               |
| NM_001100626 | ERLIN1       | 1541 | 1595 | 4.00026304389 |               |
| NM_001100626 | ERLIN1       | 1457 | 1522 | 4.00026977472 |               |
| NM_001100626 | ERLIN1       | 926  | 970  | 3.41530726667 |               |
| NM_001100626 | ERLIN1       | 647  | 747  | 4.00026977494 |               |
| NM_001100626 | ERLIN1       | 518  | 597  | 4.41530727422 |               |
| NM_001100626 | ERLIN1       | 987  | 1111 | 6.41530727422 |               |

|              |         |      |      |               |
|--------------|---------|------|------|---------------|
| NM_001100626 | ERLIN1  | 2571 | 2642 | 3.41530727422 |
| NM_001100626 | ERLIN1  | 792  | 870  | 4.00026304389 |
| NM_001100626 | ERLIN1  | 1188 | 1331 | 4.73723536911 |
| NM_001100626 | ERLIN1  | 1349 | 1453 | 3.41530727422 |
| NM_001100626 | ERLIN1  | 114  | 255  | 5.41530727422 |
| NM_001100626 | ERLIN1  | 2756 | 2909 | 6.22266219628 |
| NM_001100626 | ERLIN1  | 1692 | 1782 | 3.41530727422 |
| NM_001100626 | ERLIN1  | 1816 | 1884 | 3.41530726667 |
| NM_001100626 | ERLIN1  | 266  | 514  | 6.807624697   |
| NM_001100626 | ERLIN1  | 2416 | 2545 | 3.41530727421 |
| NM_001100626 | ERLIN1  | 1635 | 1690 | 2.33116806483 |
| NM_198935    | SS18L1  | 4265 | 4346 | 7.16760086692 |
| NM_198686    | RAB15   | 235  | 285  | 7.93118935651 |
| NM_198686    | RAB15   | 332  | 373  | 8.93118262547 |
| NM_198686    | RAB15   | 3268 | 3335 | 7.9311893563  |
| NM_198686    | RAB15   | 95   | 160  | 9.51615184969 |
| NM_198686    | RAB15   | 1767 | 1823 | 9.51597810692 |
| NM_198686    | RAB15   | 2115 | 2184 | 8.93118935652 |
| NM_198686    | RAB15   | 1184 | 1317 | 11.101114358  |
| NM_198686    | RAB15   | 3182 | 3265 | 7.92717175635 |
| NM_001105568 | KIF13A  | 190  | 252  | 8.01548550703 |
| NM_001105568 | KIF13A  | 6129 | 6180 | 7.60044777939 |
| NM_001105568 | KIF13A  | 5866 | 5957 | 8.33741360947 |
| NM_001105568 | KIF13A  | 1188 | 1253 | 5.9313463052  |
| NM_001105568 | KIF13A  | 6206 | 6253 | 7.59643041513 |
| NM_001105568 | KIF13A  | 6412 | 6521 | 8.01548551458 |
| NM_001105568 | KIF13A  | 1495 | 1556 | 7.01531176427 |
| NM_001105568 | KIF13A  | 2266 | 2320 | 7.01531176427 |
| NM_001105568 | KIF13A  | 1862 | 1923 | 6.01531176427 |
| NM_003942    | RPS6KA4 | 712  | 758  | 8.1707357914  |
| NM_003942    | RPS6KA4 | 1840 | 1872 | 9.1707357914  |
| NM_003942    | RPS6KA4 | 561  | 641  | 10.1707425224 |
| NM_001012241 | MSL1    | 113  | 181  | 5.65981363455 |
| NM_001012241 | MSL1    | 836  | 894  | 6.39677922871 |
| NM_001012241 | MSL1    | 990  | 1051 | 4.07485112628 |
| NM_001012241 | MSL1    | 1510 | 1581 | 6.88220605589 |
| NM_001012241 | MSL1    | 3294 | 3367 | 5.07485113383 |
| NM_001012241 | MSL1    | 3691 | 3730 | 4.07467738352 |
| NM_001012241 | MSL1    | 643  | 717  | 4.07485113361 |
| NM_001012241 | MSL1    | 1295 | 1389 | 5.07484440278 |
| NM_001012241 | MSL1    | 3164 | 3251 | 6.07485113383 |
| NM_001012241 | MSL1    | 556  | 626  | 5.07485089791 |
| NM_001012241 | MSL1    | 1127 | 1202 | 5.07485113361 |
| NM_001012241 | MSL1    | 307  | 367  | 5.65981363455 |
| NM_001012241 | MSL1    | 3398 | 3473 | 4.07083353366 |
| NM_001012241 | MSL1    | 2788 | 2872 | 5.07485113383 |
| NM_006117    | ECI2    | 283  | 326  | 3.85391775197 |
| NM_006117    | ECI2    | 131  | 184  | 2.84990688285 |
| NM_006117    | ECI2    | 186  | 271  | 4.85392447547 |
| NM_006117    | ECI2    | 981  | 1034 | 2.8537507327  |

|              |         |      |      |               |
|--------------|---------|------|------|---------------|
| NM_006117    | ECI2    | 678  | 793  | 5.66127940508 |
| NM_006117    | ECI2    | 377  | 525  | 5.17585257791 |
| NM_001145144 | SLC1A5  | 51   | 107  | 5.27244484235 |
| NM_001145144 | SLC1A5  | 109  | 137  | 2.60334313225 |
| NM_001145144 | SLC1A5  | 1311 | 1413 | 5.27244484235 |
| NM_001145144 | SLC1A5  | 151  | 1030 | 9.76429793868 |
| NM_001145144 | SLC1A5  | 1429 | 1715 | 7.68748234163 |
| NM_001145144 | SLC1A5  | 1048 | 1293 | 7.64167865202 |
| NM_003432    | ZNF131  | 733  | 766  | 6.45451848296 |
| NM_003432    | ZNF131  | 1275 | 1346 | 5.45469223328 |
| NM_006110    | CD2BP2  | 2286 | 2351 | 5.850065209   |
| NM_006110    | CD2BP2  | 1632 | 1702 | 5.85390905885 |
| NM_006110    | CD2BP2  | 428  | 474  | 6.850065209   |
| NM_006110    | CD2BP2  | 826  | 870  | 5.76994359979 |
| NM_006110    | CD2BP2  | 363  | 419  | 5.850065209   |
| NM_006110    | CD2BP2  | 480  | 569  | 7.85408280917 |
| NM_006110    | CD2BP2  | 1107 | 1210 | 7.43904530989 |
| NM_006110    | CD2BP2  | 2922 | 2970 | 5.76994359979 |
| NM_006110    | CD2BP2  | 1447 | 1530 | 6.85408280917 |
| NM_153045    | C9orf91 | 2939 | 2979 | 8.46219673733 |
| NM_003439    | ZKSCAN1 | 3665 | 3722 | 5.30266263291 |
| NM_003439    | ZKSCAN1 | 8017 | 8086 | 5.30266263291 |
| NM_003439    | ZKSCAN1 | 3378 | 3434 | 6.30266263291 |
| NM_003439    | ZKSCAN1 | 615  | 655  | 5.30266239699 |
| NM_003439    | ZKSCAN1 | 5405 | 5464 | 5.29864503274 |
| NM_003439    | ZKSCAN1 | 1871 | 1939 | 5.88762489771 |
| NM_003439    | ZKSCAN1 | 893  | 947  | 5.30265590186 |
| NM_003439    | ZKSCAN1 | 2453 | 2504 | 5.29864503274 |
| NM_003439    | ZKSCAN1 | 2696 | 2749 | 6.30266262536 |
| NM_003439    | ZKSCAN1 | 6300 | 6379 | 5.30266263291 |
| NM_003439    | ZKSCAN1 | 8823 | 8908 | 5.88762513363 |
| NM_003439    | ZKSCAN1 | 4697 | 4747 | 4.30265590186 |
| NM_003439    | ZKSCAN1 | 4426 | 4548 | 5.30266263291 |
| NM_003439    | ZKSCAN1 | 678  | 754  | 5.88762513363 |
| NM_003439    | ZKSCAN1 | 5184 | 5280 | 5.88762513363 |
| NM_003439    | ZKSCAN1 | 768  | 849  | 5.30266263291 |
| NM_003439    | ZKSCAN1 | 298  | 341  | 4.30248888259 |
| NM_003439    | ZKSCAN1 | 2994 | 3030 | 5.30265590186 |
| NM_003439    | ZKSCAN1 | 8571 | 8609 | 4.21852342353 |
| NM_003439    | ZKSCAN1 | 175  | 273  | 5.88762513363 |
| NM_003439    | ZKSCAN1 | 954  | 1039 | 6.6245907278  |
| NM_003439    | ZKSCAN1 | 1966 | 2027 | 5.88761840258 |
| NM_003439    | ZKSCAN1 | 5098 | 5153 | 5.30266239699 |
| NM_003439    | ZKSCAN1 | 2221 | 2320 | 4.30266263269 |
| NM_003439    | ZKSCAN1 | 2582 | 2642 | 5.30248888259 |
| NM_003439    | ZKSCAN1 | 5909 | 6031 | 6.88762513363 |
| NM_003439    | ZKSCAN1 | 6224 | 6289 | 4.29864503274 |
| NM_003439    | ZKSCAN1 | 3549 | 3610 | 4.30265590186 |
| NM_003439    | ZKSCAN1 | 6125 | 6208 | 5.88762513363 |
| NM_003439    | ZKSCAN1 | 5283 | 5360 | 4.30248888259 |

|              |         |      |      |               |
|--------------|---------|------|------|---------------|
| NM_003439    | ZKSCAN1 | 2877 | 2988 | 7.47258763435 |
| NM_003439    | ZKSCAN1 | 8924 | 9024 | 6.30266263291 |
| NM_003439    | ZKSCAN1 | 416  | 606  | 6.30266263291 |
| NM_003439    | ZKSCAN1 | 3183 | 3325 | 7.11001755497 |
| NM_003439    | ZKSCAN1 | 1630 | 1787 | 6.6245907278  |
| NM_003439    | ZKSCAN1 | 7079 | 7309 | 8.00310235105 |
| NM_003439    | ZKSCAN1 | 7392 | 7444 | 4.29864503274 |
| NM_006118    | HAX1    | 661  | 741  | 7.32770230149 |
| NM_006118    | HAX1    | 922  | 1003 | 7.0057742066  |
| NM_006118    | HAX1    | 784  | 868  | 6.59072997627 |
| NM_006118    | HAX1    | 467  | 555  | 6.00577420661 |
| NM_006118    | HAX1    | 379  | 464  | 6.59073670733 |
| NM_006118    | HAX1    | 155  | 296  | 6.59073670733 |
| NM_001194991 | MEPCE   | 1646 | 1702 | 8.27489232223 |
| NM_001194991 | MEPCE   | 1539 | 1599 | 8.27489208631 |
| NM_001194991 | MEPCE   | 1089 | 1176 | 8.68992982151 |
| NM_001194991 | MEPCE   | 503  | 632  | 8.27489232223 |
| NM_001194991 | MEPCE   | 1423 | 1521 | 9.49728474356 |
| NM_001194991 | MEPCE   | 890  | 1031 | 9.01185791639 |
| NM_033406    | FBX03   | 268  | 314  | 6.71574616795 |
| NM_033406    | FBX03   | 100  | 142  | 8.38083027788 |
| NM_033406    | FBX03   | 513  | 567  | 8.38083027788 |
| NM_033406    | FBX03   | 856  | 937  | 6.79988536978 |
| NM_198066    | GNPNAT1 | 416  | 498  | 3.04692614844 |
| NM_198066    | GNPNAT1 | 504  | 592  | 3.63188864917 |
| NM_198066    | GNPNAT1 | 3703 | 3778 | 3.04691941739 |
| NM_198066    | GNPNAT1 | 250  | 326  | 3.63171489885 |
| NM_198061    | CES2    | 2018 | 2061 | 6.60675527921 |
| NM_032520    | GNPTG   | 409  | 479  | 4.73191995514 |
| NM_006373    | VAT1    | 64   | 112  | 6.64818389486 |
| NM_006373    | VAT1    | 1447 | 1531 | 7.06322139415 |
| NM_006373    | VAT1    | 1278 | 1340 | 6.64818389487 |
| NM_006373    | VAT1    | 744  | 830  | 6.64818389487 |
| NM_006373    | VAT1    | 1681 | 1752 | 7.38514948904 |
| NM_006373    | VAT1    | 1957 | 2020 | 5.06321466309 |
| NM_006373    | VAT1    | 2309 | 2376 | 5.06322139414 |
| NM_006373    | VAT1    | 1387 | 1434 | 6.06321466309 |
| NM_006373    | VAT1    | 1838 | 1913 | 6.0632213866  |
| NM_006373    | VAT1    | 841  | 890  | 6.05920379397 |
| NM_006373    | VAT1    | 970  | 1044 | 6.64818389487 |
| NM_006373    | VAT1    | 256  | 300  | 4.97908218476 |
| NM_006373    | VAT1    | 463  | 551  | 5.06322139415 |
| NM_006372    | SYNCRIP | 1466 | 1551 | 4.18066232649 |
| NM_006372    | SYNCRIP | 2460 | 2590 | 5.50259042138 |
| NM_006372    | SYNCRIP | 354  | 421  | 4.18048857617 |
| NM_006372    | SYNCRIP | 2652 | 2734 | 4.17664472632 |
| NM_006372    | SYNCRIP | 423  | 592  | 4.76562482721 |
| NM_006372    | SYNCRIP | 1032 | 1421 | 8.13485863688 |
| NM_006372    | SYNCRIP | 642  | 991  | 7.35058732793 |
| NM_006372    | SYNCRIP | 1563 | 1657 | 5.18066232649 |

|           |          |      |      |                    |
|-----------|----------|------|------|--------------------|
| NM_006372 | SYNCRIP  | 1669 | 1801 | 6.18066232649      |
| NM_006372 | SYNCRIP  | 1869 | 2065 | 6.18066232649      |
| NM_006371 | CRTAP    | 601  | 674  | 6.16215884533      |
| NM_006371 | CRTAP    | 770  | 830  | 4.5771961087       |
| NM_006371 | CRTAP    | 1821 | 1926 | 5.57719634462      |
| NM_006371 | CRTAP    | 973  | 1071 | 6.8991244395       |
| NM_006371 | CRTAP    | 867  | 951  | 6.16215884534      |
| NM_006371 | CRTAP    | 1206 | 1321 | 7.74712134606      |
| NM_006370 | VTI1B    | 1100 | 1203 | 4.78613412199      |
| NM_006377 | UNC13B   | 6137 | 6216 | 6.22775712619      |
| NM_006377 | UNC13B   | 5542 | 5657 | 7.23177472637      |
| NM_006377 | UNC13B   | 3032 | 3115 | 7.23177449045      |
| NM_006374 | STK25    | 2105 | 2152 | 4.01632521769      |
| NM_006374 | STK25    | 1048 | 1097 | 4.01615146737      |
| NM_006374 | STK25    | 1172 | 1257 | 4.01632521769      |
| NM_006374 | STK25    | 1560 | 1736 | 6.18625021913      |
| NM_006374 | STK25    | 2022 | 2101 | 4.60128771086      |
| NM_006374 | STK25    | 562  | 810  | 6.60128771841      |
| NM_006374 | STK25    | 2153 | 2220 | 4.01632521747      |
| NM_006374 | STK25    | 311  | 391  | 4.01632521769      |
| NM_018346 | RSAD1    | 548  | 602  | 7.34710823083      |
| NM_152740 | HIBADH   | 294  | 375  | 6.67986226936      |
| NM_152740 | HIBADH   | 1401 | 1452 | 5.67986226936      |
| NM_152740 | HIBADH   | 675  | 757  | 6.26482476275      |
| NM_152740 | HIBADH   | 946  | 992  | 5.67968851926      |
| NM_152740 | HIBADH   | 993  | 1097 | 4.67986226958      |
| NM_152740 | HIBADH   | 814  | 905  | 7.00179036447      |
| NM_014802 | KIAA0528 |      | 2473 | 2523 6.6916542339  |
| NM_014802 | KIAA0528 |      | 622  | 672 5.77578671223  |
| NM_014802 | KIAA0528 |      | 4085 | 4184 7.36075593646 |
| NM_014802 | KIAA0528 |      | 2714 | 2754 7.27661673462 |
| NM_014802 | KIAA0528 |      | 1908 | 1964 7.36075594378 |
| NM_078483 | SLC36A1  | 1516 | 1579 | 10.4949319876      |
| NM_078483 | SLC36A1  | 3985 | 4058 | 11.0798944883      |
| NM_078483 | SLC36A1  | 387  | 452  | 9.49476496832      |
| NM_078483 | SLC36A1  | 637  | 795  | 11.0799012194      |
| NM_078483 | SLC36A1  | 4058 | 4105 | 11.079727469       |
| NM_078483 | SLC36A1  | 563  | 625  | 9.49092111847      |
| NM_020673 | RAB22A   | 6974 | 7036 | 6.29042668709      |
| NM_020673 | RAB22A   | 6043 | 6124 | 6.2904266871       |
| NM_177925 | H2AFJ    | 88   | 129  | 7.29816116894      |
| NM_177925 | H2AFJ    | 267  | 368  | 6.38230037833      |
| NM_014142 | NUDT5    | 611  | 668  | 5.45350279675      |
| NM_014142 | NUDT5    | 294  | 378  | 7.03847202853      |
| NM_014142 | NUDT5    | 1126 | 1169 | 4.45350952026      |
| NM_014142 | NUDT5    | 379  | 459  | 6.03847202853      |
| NM_014142 | NUDT5    | 814  | 1004 | 7.7754376227       |
| NM_014142 | NUDT5    | 510  | 604  | 7.45350952781      |
| NM_014140 | SMARCAL1 |      | 360  | 444 5.94185798284  |
| NM_005875 | EIF1B    | 246  | 299  | 3.08238427006      |

|           |        |      |      |               |
|-----------|--------|------|------|---------------|
| NM_005875 | EIF1B  | 514  | 587  | 1.49340416939 |
| NM_005875 | EIF1B  | 311  | 388  | 1.49742153365 |
| NM_014149 | WDR91  | 126  | 225  | 7.42044351108 |
| NM_005871 | SMNDC1 | 193  | 243  | 4.74434995026 |
| NM_005871 | SMNDC1 | 1570 | 1654 | 5.74836755043 |
| NM_005871 | SMNDC1 | 1234 | 1291 | 5.74836081938 |
| NM_005870 | SAP18  | 242  | 311  | 3.76338147031 |
| NM_005870 | SAP18  | 143  | 189  | 1.44127963265 |
| NM_005870 | SAP18  | 192  | 242  | 1.44145338275 |
| NM_005870 | SAP18  | 401  | 467  | 3.76338147786 |
| NM_005870 | SAP18  | 358  | 401  | 2.44127963265 |
| NM_005870 | SAP18  | 584  | 664  | 2.44144665192 |
| NM_005870 | SAP18  | 480  | 553  | 2.44145338296 |
| NM_005870 | SAP18  | 675  | 813  | 3.44145338297 |
| NM_005872 | BCAS2  | 195  | 244  | 2.30622370837 |
| NM_005872 | BCAS2  | 118  | 167  | 2.30639072763 |
| NM_015544 | TMEM98 | 402  | 495  | 6.83051296486 |
| NM_015544 | TMEM98 | 1648 | 1713 | 5.83051296486 |
| NM_015544 | TMEM98 | 1382 | 1428 | 5.82649536468 |
| NM_015544 | TMEM98 | 560  | 611  | 4.8305062338  |
| NM_015544 | TMEM98 | 725  | 823  | 7.15244105974 |
| NM_015544 | TMEM98 | 1582 | 1641 | 6.41547546558 |
| NM_015544 | TMEM98 | 612  | 723  | 6.83051296486 |
| NM_015544 | TMEM98 | 1462 | 1581 | 6.41547546558 |
| NM_015544 | TMEM98 | 956  | 1082 | 7.83051296486 |
| NM_015544 | TMEM98 | 872  | 956  | 5.83051296486 |
| NM_018641 | CHST12 | 237  | 293  | 8.55694446294 |
| NM_018641 | CHST12 | 1179 | 1279 | 9.2939100571  |
| NM_018641 | CHST12 | 955  | 1033 | 7.97198196222 |
| NM_018641 | CHST12 | 1700 | 1761 | 6.96796436204 |
| NM_018641 | CHST12 | 1494 | 1575 | 8.97198196222 |
| NM_018641 | CHST12 | 1292 | 1455 | 9.2939100571  |
| NM_018641 | CHST12 | 618  | 713  | 7.97198196222 |
| NM_018641 | CHST12 | 381  | 428  | 7.9719817263  |
| NM_015230 | ARAP2  | 6261 | 6310 | 13.0987367283 |
| NM_015230 | ARAP2  | 2777 | 2831 | 14.0948928784 |
| NM_015230 | ARAP2  | 6634 | 6671 | 14.0987367283 |
| NM_015230 | ARAP2  | 2188 | 2289 | 14.0987367283 |
| NM_015230 | ARAP2  | 1157 | 1220 | 13.0948928784 |
| NM_015231 | NUP160 | 2277 | 2353 | 6.91197270578 |
| NM_015231 | NUP160 | 3173 | 3211 | 6.91180568651 |
| NM_015231 | NUP160 | 1079 | 1111 | 5.32299933594 |
| NM_015231 | NUP160 | 4368 | 4445 | 6.91180568651 |
| NM_015231 | NUP160 | 2590 | 2663 | 6.91197943683 |
| NM_015231 | NUP160 | 3753 | 3798 | 6.24287772673 |
| NM_015231 | NUP160 | 2691 | 2757 | 6.32701692856 |
| NM_015231 | NUP160 | 605  | 674  | 6.91197270578 |
| NM_015231 | NUP160 | 2358 | 2407 | 5.32701693611 |
| NM_015231 | NUP160 | 484  | 547  | 6.32701670019 |
| NM_015231 | NUP160 | 1644 | 1697 | 6.32299933594 |



|           |        |       |       |               |
|-----------|--------|-------|-------|---------------|
| NM_015231 | NUP160 | 4484  | 4534  | 6.24287772673 |
| NM_015231 | NUP160 | 3598  | 3657  | 6.32684318579 |
| NM_015231 | NUP160 | 3050  | 3118  | 7.32684318579 |
| NM_015231 | NUP160 | 4067  | 4170  | 7.91197943683 |
| NM_015231 | NUP160 | 2512  | 2579  | 6.32701670019 |
| NM_015231 | NUP160 | 3981  | 4060  | 6.32299933594 |
| NM_015231 | NUP160 | 1466  | 1639  | 8.32701693611 |
| NM_015231 | NUP160 | 2793  | 2933  | 5.32701693611 |
| NM_015231 | NUP160 | 1218  | 1400  | 8.91197943683 |
| NM_015231 | NUP160 | 1800  | 1894  | 6.32684318579 |
| NM_015231 | NUP160 | 1908  | 1968  | 5.32701693611 |
| NM_015231 | NUP160 | 3385  | 3549  | 8.49694193755 |
| NM_015231 | NUP160 | 3215  | 3360  | 8.49694193755 |
| NM_015542 | UPF2   | 1477  | 1518  | 5.31444816416 |
| NM_015542 | UPF2   | 1908  | 1957  | 5.23031568582 |
| NM_015542 | UPF2   | 4998  | 5029  | 5.31043729504 |
| NM_015542 | UPF2   | 2422  | 2481  | 5.31043729504 |
| NM_015542 | UPF2   | 3017  | 3126  | 6.89941739593 |
| NM_015542 | UPF2   | 1007  | 1106  | 7.31445489521 |
| NM_015542 | UPF2   | 2226  | 2307  | 6.89941739593 |
| NM_015235 | CSTF2T | 572   | 629   | 10.1673153217 |
| NM_015235 | CSTF2T | 1259  | 1339  | 7.84538049579 |
| NM_015235 | CSTF2T | 120   | 227   | 9.84538722685 |
| NM_015235 | CSTF2T | 952   | 1016  | 8.84538722684 |
| NM_015235 | CSTF2T | 633   | 695   | 8.84521347653 |
| NM_015235 | CSTF2T | 1905  | 1982  | 9.84538722685 |
| NM_018648 | NOP10  | 35    | 415   | 9.82182126664 |
| NM_018649 | H2AFY2 | 546   | 653   | 7.61259675695 |
| NM_018649 | H2AFY2 | 884   | 952   | 7.6125900259  |
| NM_018649 | H2AFY2 | 419   | 477   | 6.61259675673 |
| NM_018649 | H2AFY2 | 1880  | 1978  | 7.61259675695 |
| NM_018318 | CCDC91 | 147   | 235   | 4.77193232337 |
| NM_018318 | CCDC91 | 84    | 136   | 4.68779984504 |
| NM_018319 | TDP1   | 1094  | 1132  | 7.94404337322 |
| NM_018319 | TDP1   | 1518  | 1594  | 8.94404337322 |
| NM_015548 | DST    | 9554  | 9599  | 5.46762245152 |
| NM_015548 | DST    | 2553  | 2637  | 7.0525916833  |
| NM_015548 | DST    | 14823 | 14906 | 7.0525916833  |
| NM_015548 | DST    | 1228  | 1289  | 5.46762918258 |
| NM_015548 | DST    | 11394 | 11467 | 4.46745543226 |
| NM_015548 | DST    | 2441  | 2507  | 4.46762918258 |
| NM_015548 | DST    | 13889 | 13940 | 5.46762245152 |
| NM_015548 | DST    | 5349  | 5454  | 7.0525916833  |
| NM_015548 | DST    | 937   | 1018  | 7.0525916833  |
| NM_015548 | DST    | 9705  | 9780  | 6.78955727746 |
| NM_015548 | DST    | 16276 | 16343 | 6.0525916833  |
| NM_015548 | DST    | 5455  | 5508  | 6.05259168329 |
| NM_015548 | DST    | 289   | 361   | 4.46762917503 |
| NM_015548 | DST    | 15969 | 16024 | 4.38348997319 |
| NM_015548 | DST    | 10354 | 10438 | 6.0525916833  |

|           |     |       |       |               |
|-----------|-----|-------|-------|---------------|
| NM_015548 | DST | 7881  | 7952  | 6.46762918258 |
| NM_015548 | DST | 1427  | 1475  | 5.4636115824  |
| NM_015548 | DST | 12108 | 12147 | 4.4636115824  |
| NM_015548 | DST | 12352 | 12412 | 6.05259168308 |
| NM_015548 | DST | 8791  | 8846  | 5.4636115824  |
| NM_015548 | DST | 13005 | 13065 | 5.46762918258 |
| NM_015548 | DST | 15284 | 15337 | 4.46762245152 |
| NM_015548 | DST | 10961 | 11077 | 7.0525916833  |
| NM_015548 | DST | 12426 | 12488 | 4.4636115824  |
| NM_015548 | DST | 751   | 801   | 5.46762918257 |
| NM_015548 | DST | 4837  | 4908  | 4.46762245152 |
| NM_015548 | DST | 1885  | 1957  | 6.05259144738 |
| NM_015548 | DST | 12909 | 12985 | 6.0525916833  |
| NM_015548 | DST | 1742  | 1834  | 6.0525916833  |
| NM_015548 | DST | 8211  | 8259  | 6.05259168308 |
| NM_015548 | DST | 7742  | 7807  | 6.05259167575 |
| NM_015548 | DST | 9243  | 9297  | 4.38348997319 |
| NM_015548 | DST | 5662  | 5698  | 5.4636115824  |
| NM_015548 | DST | 3322  | 3377  | 5.46762245152 |
| NM_015548 | DST | 16216 | 16258 | 6.05259167575 |
| NM_015548 | DST | 10689 | 10731 | 5.46762245152 |
| NM_015548 | DST | 12807 | 12871 | 4.46762918258 |
| NM_015548 | DST | 11913 | 11964 | 4.46762245152 |
| NM_015548 | DST | 11505 | 11602 | 4.46762918258 |
| NM_015548 | DST | 7984  | 8085  | 6.05241793298 |
| NM_015548 | DST | 376   | 412   | 4.38348997319 |
| NM_015548 | DST | 808   | 903   | 7.27498410463 |
| NM_015548 | DST | 16113 | 16190 | 4.38348997319 |
| NM_015548 | DST | 7250  | 7333  | 5.46762918258 |
| NM_015548 | DST | 6595  | 6643  | 6.05259167575 |
| NM_015548 | DST | 14141 | 14187 | 4.46762245152 |
| NM_015548 | DST | 4646  | 4734  | 4.46762918258 |
| NM_015548 | DST | 2270  | 2423  | 7.78955727746 |
| NM_015548 | DST | 1512  | 1660  | 6.05259168329 |
| NM_015548 | DST | 14356 | 14434 | 6.46762918258 |
| NM_015548 | DST | 5548  | 5659  | 4.46762918235 |
| NM_015548 | DST | 4333  | 4422  | 5.46762918258 |
| NM_015548 | DST | 9329  | 9468  | 7.78955727746 |
| NM_015548 | DST | 9808  | 9924  | 6.0525916833  |
| NM_015548 | DST | 11602 | 11699 | 5.46762918258 |
| NM_015548 | DST | 11115 | 11276 | 7.27498410463 |
| NM_015548 | DST | 11708 | 11800 | 6.46762918258 |
| NM_015548 | DST | 4205  | 4320  | 4.46762918257 |
| NM_015548 | DST | 2116  | 2176  | 4.46745543226 |
| NM_015548 | DST | 13665 | 13805 | 6.78955727746 |
| NM_015548 | DST | 10801 | 10910 | 5.46762918258 |
| NM_015548 | DST | 6339  | 6454  | 6.0525916833  |
| NM_015548 | DST | 15641 | 15945 | 8.55509202383 |
| NM_015548 | DST | 1964  | 2116  | 8.0525916833  |
| NM_015548 | DST | 4911  | 4976  | 6.78955727746 |

|              |       |       |       |               |
|--------------|-------|-------|-------|---------------|
| NM_015548    | DST   | 4977  | 5227  | 7.0525916833  |
| NM_015548    | DST   | 581   | 748   | 7.46762918258 |
| NM_015548    | DST   | 7813  | 7877  | 6.05259168329 |
| NM_015548    | DST   | 9962  | 10045 | 6.46762918258 |
| NM_015548    | DST   | 13075 | 13381 | 8.16806890072 |
| NM_015548    | DST   | 10136 | 10312 | 6.78955727746 |
| NM_015548    | DST   | 13949 | 14069 | 6.78955727746 |
| NM_015548    | DST   | 14567 | 14657 | 5.46762918258 |
| NM_015548    | DST   | 412   | 578   | 8.0525916833  |
| NM_015548    | DST   | 5736  | 5820  | 4.46762918258 |
| NM_015548    | DST   | 12543 | 12802 | 7.92706080121 |
| NM_015548    | DST   | 3085  | 3260  | 6.78955727746 |
| NM_015548    | DST   | 10560 | 10684 | 6.0525916833  |
| NM_015548    | DST   | 15383 | 15505 | 6.46762918258 |
| NM_015548    | DST   | 14449 | 14552 | 6.0525916833  |
| NM_015548    | DST   | 2959  | 3014  | 5.46762245152 |
| NM_015548    | DST   | 2639  | 2794  | 4.46762918258 |
| NM_015548    | DST   | 6660  | 6797  | 6.0525916833  |
| NM_007080    | LSM6  | 171   | 222   | 3.90692330855 |
| NM_007086    | WDHD1 | 2051  | 2123  | 6.02881258319 |
| NM_007086    | WDHD1 | 148   | 216   | 7.03283018335 |
| NM_002473    | MYH9  | 6740  | 6776  | 2.75391914217 |
| NM_002473    | MYH9  | 5019  | 5114  | 3.83404075138 |
| NM_002473    | MYH9  | 6468  | 6529  | 2.8380516205  |
| NM_002473    | MYH9  | 367   | 456   | 2.83805811564 |
| NM_002473    | MYH9  | 6984  | 7068  | 3.83805835155 |
| NM_002473    | MYH9  | 532   | 659   | 5.42302085228 |
| NM_001204745 | CDH16 | 205   | 234   | 8.66461663282 |
| NM_001204745 | CDH16 | 1684  | 1759  | 9.66461663282 |
| NM_001204745 | CDH16 | 1305  | 1337  | 9.58449502361 |
| NM_001130144 | LTBP3 | 2615  | 2682  | 8.29695835478 |
| NM_001130144 | LTBP3 | 1692  | 1728  | 6.62785664469 |
| NM_001130144 | LTBP3 | 3009  | 3060  | 8.29695834724 |
| NM_001130144 | LTBP3 | 3344  | 3431  | 8.29695835479 |
| NM_001130144 | LTBP3 | 3893  | 3949  | 6.71199585385 |
| NM_001130144 | LTBP3 | 2242  | 2299  | 6.7079782539  |
| NM_001130144 | LTBP3 | 1931  | 2030  | 8.29695835479 |
| NM_001130144 | LTBP3 | 461   | 581   | 8.29695835479 |
| NM_001130144 | LTBP3 | 614   | 695   | 7.71199585407 |
| NM_001130144 | LTBP3 | 4026  | 4114  | 6.71182210375 |
| NM_001130144 | LTBP3 | 1446  | 1511  | 7.71199585385 |
| NM_033049    | MUC13 | 1110  | 1159  | 12.1024794155 |
| NM_033049    | MUC13 | 493   | 561   | 9.78054458953 |
| NM_033049    | MUC13 | 2435  | 2522  | 10.7805510847 |
| NM_033049    | MUC13 | 1170  | 1463  | 15.2724044169 |
| NM_033049    | MUC13 | 1959  | 2028  | 12.3655138213 |
| NM_033049    | MUC13 | 2052  | 2199  | 12.950476322  |
| NM_033049    | MUC13 | 2755  | 2862  | 13.8680141618 |
| NM_033049    | MUC13 | 571   | 1106  | 16.3041132766 |
| NM_033049    | MUC13 | 303   | 482   | 13.950476322  |

|              |          |      |      |                |               |
|--------------|----------|------|------|----------------|---------------|
| NM_033049    | MUC13    | 1463 | 1935 | 15.4809910387  |               |
| NM_033049    | MUC13    | 44   | 297  | 14.028478834   |               |
| NM_033049    | MUC13    | 2533 | 2694 | 12.7805513206  |               |
| NM_033049    | MUC13    | 2217 | 2376 | 12.5879062426  |               |
| NM_033515    | ARHGAP18 |      | 2312 | 2369           | 3.05656664675 |
| NM_033515    | ARHGAP18 |      | 1240 | 1279           | 3.97644503754 |
| NM_033515    | ARHGAP18 |      | 1502 | 1555           | 4.64554651173 |
| NM_033515    | ARHGAP18 |      | 267  | 353            | 5.06058424692 |
| NM_033515    | ARHGAP18 |      | 501  | 552            | 3.06041049661 |
| NM_033515    | ARHGAP18 |      | 573  | 634            | 4.64537299733 |
| NM_033515    | ARHGAP18 |      | 1064 | 1115           | 4.64554001659 |
| NM_033515    | ARHGAP18 |      | 2152 | 2214           | 3.0605842467  |
| NM_033515    | ARHGAP18 |      | 2679 | 2750           | 3.05656664675 |
| NM_033515    | ARHGAP18 |      | 2963 | 3060           | 4.06057751587 |
| NM_001099692 | EIF5AL1  | 828  | 889  | 5.06897051918  |               |
| NM_001099692 | EIF5AL1  | 316  | 367  | 2.2614418468   |               |
| NM_001099692 | EIF5AL1  | 609  | 673  | 5.26161559712  |               |
| NM_001099692 | EIF5AL1  | 375  | 522  | 5.96205531526  |               |
| NM_001099692 | EIF5AL1  | 1069 | 1147 | 4.26161559712  |               |
| NM_001099692 | EIF5AL1  | 61   | 153  | 4.84657809784  |               |
| NM_001099692 | EIF5AL1  | 916  | 989  | 4.26161559712  |               |
| NM_001099692 | EIF5AL1  | 182  | 290  | 5.72104721576  |               |
| NM_001099694 | ZNF578   | 4994 | 5021 | 10.8915912665  |               |
| NM_001110781 | SLC35E2B |      | 4933 | 5004           | 7.67728350791 |
| NM_001110781 | SLC35E2B |      | 2413 | 2456           | 7.67327263879 |
| NM_001110781 | SLC35E2B |      | 3487 | 3530           | 9.26225273969 |
| NM_001110781 | SLC35E2B |      | 1106 | 1157           | 8.67729023896 |
| NM_001110781 | SLC35E2B |      | 5296 | 5374           | 10.484645161  |
| NM_001110781 | SLC35E2B |      | 4826 | 4930           | 9.26224600863 |
| NM_001110781 | SLC35E2B |      | 3652 | 3775           | 10.2622527397 |
| NM_001110781 | SLC35E2B |      | 5197 | 5247           | 7.67711648865 |
| NM_001110781 | SLC35E2B |      | 2695 | 2737           | 7.67728350791 |
| NM_001110781 | SLC35E2B |      | 1927 | 1973           | 9.26207898937 |
| NM_001110781 | SLC35E2B |      | 3218 | 3294           | 9.67729023897 |
| NM_001110781 | SLC35E2B |      | 4403 | 4435           | 7.59315102958 |
| NM_001110781 | SLC35E2B |      | 4511 | 4637           | 8.67729023897 |
| NM_001110781 | SLC35E2B |      | 5457 | 5637           | 10.2622527397 |
| NM_001110781 | SLC35E2B |      | 1375 | 1448           | 8.67729000305 |
| NM_001110781 | SLC35E2B |      | 558  | 612            | 8.67327263879 |
| NM_001110781 | SLC35E2B |      | 689  | 790            | 10.484645161  |
| NM_001110781 | SLC35E2B |      | 4109 | 4190           | 9.99921833385 |
| NM_001110781 | SLC35E2B |      | 5841 | 5938           | 9.67729023897 |
| NM_001110781 | SLC35E2B |      | 2951 | 3023           | 9.26225273968 |
| NM_001110781 | SLC35E2B |      | 923  | 1051           | 9.67729023897 |
| NM_001110781 | SLC35E2B |      | 2482 | 2668           | 10.677290239  |
| NM_001110781 | SLC35E2B |      | 3090 | 3167           | 9.67729023142 |
| NM_001110781 | SLC35E2B |      | 822  | 892            | 9.67711648865 |
| NM_022048    | CSNK1G1  | 6300 | 6341 | 7.06507355531  |               |
| NM_147782    | CTSB     | 229  | 279  | 0.644649834761 |               |
| NM_147782    | CTSB     | 1671 | 1713 | 2.22961233548  |               |

|              |        |      |      |               |
|--------------|--------|------|------|---------------|
| NM_147782    | CTSB   | 538  | 811  | 4.96657792965 |
| NM_147782    | CTSB   | 2239 | 2353 | 3.22961233548 |
| NM_147782    | CTSB   | 1760 | 1973 | 5.16821179082 |
| NM_147782    | CTSB   | 1454 | 1648 | 3.45200475682 |
| NM_147782    | CTSB   | 864  | 1400 | 6.07091458946 |
| NM_147782    | CTSB   | 294  | 524  | 4.1040814534  |
| NM_147782    | CTSB   | 2065 | 2157 | 3.22961233548 |
| NM_001025433 | NQ01   | 166  | 239  | 3.15870508279 |
| NM_001025433 | NQ01   | 716  | 758  | 3.15870484687 |
| NM_001025433 | NQ01   | 616  | 668  | 3.74366085245 |
| NM_001025433 | NQ01   | 510  | 563  | 3.15870508257 |
| NM_001025433 | NQ01   | 764  | 839  | 3.74366757596 |
| NM_001025433 | NQ01   | 341  | 470  | 3.74366758351 |
| NM_001025433 | NQ01   | 263  | 340  | 3.74366734759 |
| NM_005128    | DOPEY2 | 6478 | 6566 | 8.77533058272 |
| NM_005128    | DOPEY2 | 4021 | 4054 | 10.2761538816 |
| NM_005125    | CCS    | 82   | 136  | 6.41206322406 |
| NM_005125    | CCS    | 439  | 494  | 7.41206321651 |
| NM_005125    | CCS    | 685  | 763  | 7.99702548886 |
| NM_005125    | CCS    | 363  | 428  | 7.99702572478 |
| NM_005124    | NUP153 | 4796 | 4868 | 8.1332310025  |
| NM_005124    | NUP153 | 1860 | 1928 | 7.12921340232 |
| NM_005124    | NUP153 | 3531 | 3604 | 6.13323100228 |
| NM_005124    | NUP153 | 2740 | 2809 | 8.45515886147 |
| NM_005124    | NUP153 | 3905 | 3946 | 6.13323076658 |
| NM_005124    | NUP153 | 1411 | 1479 | 8.45515909739 |
| NM_005124    | NUP153 | 2498 | 2557 | 7.12921340232 |
| NM_005124    | NUP153 | 2562 | 2597 | 6.12921340232 |
| NM_005124    | NUP153 | 3090 | 3155 | 8.13323100228 |
| NM_005124    | NUP153 | 2414 | 2468 | 7.13322427144 |
| NM_005124    | NUP153 | 2863 | 2912 | 7.718193503   |
| NM_005124    | NUP153 | 2664 | 2715 | 7.1332310025  |
| NM_005124    | NUP153 | 718  | 805  | 6.1332310025  |
| NM_005124    | NUP153 | 1122 | 1187 | 7.13323100228 |
| NM_005124    | NUP153 | 4912 | 5005 | 7.71819350322 |
| NM_005124    | NUP153 | 881  | 949  | 7.13323076658 |
| NM_005124    | NUP153 | 5251 | 5475 | 9.59266262114 |
| NM_005124    | NUP153 | 2084 | 2150 | 7.13323099495 |
| NM_005124    | NUP153 | 2824 | 2859 | 8.13322427144 |
| NM_005124    | NUP153 | 1578 | 1730 | 9.1332310025  |
| NM_005124    | NUP153 | 4093 | 4193 | 8.45515909739 |
| NM_005124    | NUP153 | 828  | 869  | 6.12921340232 |
| NM_005124    | NUP153 | 3953 | 4029 | 7.7181932673  |
| NM_005124    | NUP153 | 3176 | 3266 | 7.13323076658 |
| NM_005124    | NUP153 | 2930 | 2985 | 7.13323076658 |
| NM_005124    | NUP153 | 2234 | 2333 | 8.1332310025  |
| NM_005124    | NUP153 | 1307 | 1400 | 6.13323099495 |
| NM_005124    | NUP153 | 1946 | 2083 | 7.1332310025  |
| NM_005124    | NUP153 | 1008 | 1116 | 8.94058592456 |
| NM_005124    | NUP153 | 4555 | 4652 | 8.45515909739 |

|           |        |      |      |               |
|-----------|--------|------|------|---------------|
| NM_005124 | NUP153 | 5546 | 5608 | 6.12921340232 |
| NM_005124 | NUP153 | 3702 | 3779 | 7.71818677217 |
| NM_005124 | NUP153 | 3371 | 3530 | 8.45515909739 |
| NM_005124 | NUP153 | 5047 | 5153 | 8.71819350322 |
| NM_005124 | NUP153 | 4287 | 4392 | 8.45515909739 |
| NM_005121 | MED13  | 1814 | 1897 | 7.42605092676 |
| NM_005121 | MED13  | 6048 | 6148 | 7.43006852693 |
| NM_005121 | MED13  | 808  | 901  | 7.43006852693 |
| NM_005121 | MED13  | 8379 | 8443 | 7.43006179588 |
| NM_005121 | MED13  | 3555 | 3643 | 7.43006852693 |
| NM_005121 | MED13  | 4242 | 4305 | 8.34592931755 |
| NM_005121 | MED13  | 2967 | 3006 | 6.42605092676 |
| NM_005121 | MED13  | 9823 | 9892 | 9.01503102765 |
| NM_005121 | MED13  | 6485 | 6544 | 7.43006179588 |
| NM_005121 | MED13  | 1499 | 1546 | 7.42605092676 |
| NM_005121 | MED13  | 4014 | 4094 | 8.43006852693 |
| NM_005121 | MED13  | 469  | 514  | 7.42605092676 |
| NM_005121 | MED13  | 2129 | 2167 | 6.34592931755 |
| NM_005121 | MED13  | 2508 | 2562 | 7.93089181827 |
| NM_005121 | MED13  | 6759 | 6821 | 8.75199662182 |
| NM_005121 | MED13  | 3223 | 3259 | 7.34592931755 |
| NM_005121 | MED13  | 3513 | 3553 | 6.43006851938 |
| NM_005121 | MED13  | 4307 | 4343 | 6.42605092676 |
| NM_005121 | MED13  | 4741 | 4797 | 7.93089181827 |
| NM_005121 | MED13  | 7775 | 7818 | 6.34592931755 |
| NM_005121 | MED13  | 2870 | 2932 | 6.43006851938 |
| NM_005121 | MED13  | 9352 | 9406 | 8.01503102743 |
| NM_005121 | MED13  | 1548 | 1642 | 8.01503102765 |
| NM_005121 | MED13  | 9511 | 9594 | 7.43006852693 |
| NM_005121 | MED13  | 5690 | 5731 | 6.34592931755 |
| NM_005121 | MED13  | 3122 | 3175 | 6.43006851938 |
| NM_005121 | MED13  | 6547 | 6672 | 8.01503102765 |
| NM_005121 | MED13  | 5743 | 5835 | 8.01503102765 |
| NM_005121 | MED13  | 5388 | 5584 | 8.43006852693 |
| NM_005121 | MED13  | 5295 | 5368 | 8.0150310201  |
| NM_005121 | MED13  | 2    | 56   | 7.42989477661 |
| NM_005121 | MED13  | 3714 | 3786 | 6.42989477661 |
| NM_005121 | MED13  | 1914 | 2029 | 8.43006851938 |
| NM_005121 | MED13  | 5586 | 5688 | 8.0150310201  |
| NM_005121 | MED13  | 7829 | 7919 | 6.43006829101 |
| NM_005121 | MED13  | 6970 | 7056 | 6.43006851938 |
| NM_005121 | MED13  | 260  | 423  | 6.43006852693 |
| NM_005121 | MED13  | 101  | 222  | 8.75199662182 |
| NM_005120 | MED12  | 3568 | 3659 | 8.89454880301 |
| NM_005120 | MED12  | 645  | 693  | 6.89053120284 |
| NM_005120 | MED12  | 4177 | 4221 | 8.47549370356 |
| NM_005120 | MED12  | 3423 | 3465 | 7.8943750527  |
| NM_005120 | MED12  | 2732 | 2811 | 7.8943750527  |
| NM_005120 | MED12  | 1706 | 1773 | 8.47951130373 |
| NM_005120 | MED12  | 2921 | 3014 | 9.2164768979  |

|           |       |      |      |                |
|-----------|-------|------|------|----------------|
| NM_005120 | MED12 | 1301 | 1387 | 9.2164768979   |
| NM_005120 | MED12 | 3051 | 3197 | 9.89454880301  |
| NM_005120 | MED12 | 1869 | 2028 | 8.89454880301  |
| NM_005120 | MED12 | 3207 | 3353 | 8.47951130373  |
| NM_005120 | MED12 | 1536 | 1694 | 8.47951130373  |
| NM_005120 | MED12 | 2850 | 2906 | 7.89454879546  |
| NM_004458 | ACSL4 | 3701 | 3747 | 3.4683030724   |
| NM_004458 | ACSL4 | 2540 | 2593 | 1.88334057167  |
| NM_004458 | ACSL4 | 79   | 171  | 1.88334056413  |
| NM_004458 | ACSL4 | 3760 | 3819 | 3.4683030724   |
| NM_004458 | ACSL4 | 4416 | 4488 | 3.88334057168  |
| NM_004458 | ACSL4 | 2875 | 2915 | 1.88334057146  |
| NM_004458 | ACSL4 | 2922 | 3087 | 4.34277219032  |
| NM_004458 | ACSL4 | 2721 | 2817 | 2.4683030724   |
| NM_004458 | ACSL4 | 4552 | 4673 | 1.88334057168  |
| NM_004458 | ACSL4 | 4201 | 4328 | 4.20526866657  |
| NM_004458 | ACSL4 | 539  | 2448 | 9.07316513056  |
| NM_004458 | ACSL4 | 4685 | 4868 | 4.58378028982  |
| NM_004458 | ACSL4 | 3863 | 4013 | 3.20526866657  |
| NM_004458 | ACSL4 | 2594 | 2711 | 3.88334057168  |
| NM_004458 | ACSL4 | 2453 | 2532 | 2.4683030724   |
| NM_004458 | ACSL4 | 3405 | 3698 | 5.27565799446  |
| NM_004458 | ACSL4 | 4017 | 4185 | 4.58378028982  |
| NM_004458 | ACSL4 | 285  | 507  | 5.52719676145  |
| NM_004458 | ACSL4 | 4888 | 4988 | 0.883340571679 |
| NM_004458 | ACSL4 | 3089 | 3364 | 4.79023116729  |
| NM_004459 | BPTF  | 1368 | 1411 | 6.50096771865  |
| NM_004459 | BPTF  | 6370 | 6413 | 6.0857632001   |
| NM_004459 | BPTF  | 961  | 1006 | 4.41683524032  |
| NM_004459 | BPTF  | 9116 | 9188 | 6.0859367145   |
| NM_004459 | BPTF  | 6745 | 6804 | 5.49695684953  |
| NM_004459 | BPTF  | 1769 | 1844 | 4.50096771865  |
| NM_004459 | BPTF  | 2742 | 2794 | 4.50080069938  |
| NM_004459 | BPTF  | 845  | 882  | 6.00179774104  |
| NM_004459 | BPTF  | 8178 | 8247 | 6.08593695041  |
| NM_004459 | BPTF  | 6100 | 6170 | 5.49695684953  |
| NM_004459 | BPTF  | 7731 | 7829 | 4.49695684953  |
| NM_004459 | BPTF  | 9442 | 9503 | 5.49695684953  |
| NM_004459 | BPTF  | 4686 | 4757 | 4.50096771865  |
| NM_004459 | BPTF  | 4248 | 4348 | 6.82290254458  |
| NM_004450 | ERH   | 238  | 277  | 5.60862651522  |
| NM_004450 | ERH   | 23   | 80   | 4.87166092083  |
| NM_004450 | ERH   | 603  | 693  | 4.87166092105  |
| NM_004450 | ERH   | 100  | 220  | 6.28669842033  |
| NM_004450 | ERH   | 311  | 578  | 7.74613003897  |
| NM_004451 | ESRRA | 439  | 482  | 8.73992510126  |
| NM_004451 | ESRRA | 1188 | 1295 | 9.73992510126  |
| NM_004451 | ESRRA | 877  | 1029 | 11.0618531961  |
| NM_004451 | ESRRA | 523  | 609  | 7.73992510104  |
| NM_004453 | ETFDH | 449  | 487  | 7.86032463833  |

|           |        |      |      |               |
|-----------|--------|------|------|---------------|
| NM_004453 | ETFDH  | 1627 | 1667 | 6.53839004831 |
| NM_004453 | ETFDH  | 1749 | 1832 | 7.53839677936 |
| NM_004453 | ETFDH  | 2047 | 2128 | 5.53839677936 |
| NM_004453 | ETFDH  | 1881 | 1958 | 7.53839677181 |
| NM_004453 | ETFDH  | 1194 | 1258 | 7.12335904417 |
| NM_173468 | MOB1B  | 4613 | 4679 | 8.12279619093 |
| NM_173468 | MOB1B  | 781  | 857  | 8.11895234108 |
| NM_173468 | MOB1B  | 5072 | 5130 | 9.11895234108 |
| NM_173468 | MOB1B  | 4325 | 4386 | 8.1229699337  |
| NM_173468 | MOB1B  | 4947 | 4980 | 8.03883073187 |
| NM_173468 | MOB1B  | 3220 | 3305 | 9.12279619093 |
| NM_173468 | MOB1B  | 5673 | 5727 | 8.1229699337  |
| NM_173468 | MOB1B  | 1119 | 1189 | 9.70793244197 |
| NM_004456 | EZH2   | 2050 | 2168 | 7.35077059747 |
| NM_004456 | EZH2   | 1701 | 1764 | 6.93573309819 |
| NM_004456 | EZH2   | 188  | 239  | 5.26663138809 |
| NM_004456 | EZH2   | 1029 | 1086 | 5.35077059747 |
| NM_004456 | EZH2   | 1845 | 1882 | 5.3467529973  |
| NM_004456 | EZH2   | 2183 | 2245 | 7.67269869236 |
| NM_004456 | EZH2   | 1339 | 1444 | 6.35077058992 |
| NM_004456 | EZH2   | 2273 | 2432 | 8.35077059747 |
| NM_004456 | EZH2   | 1926 | 2022 | 7.35077059747 |
| NM_004456 | EZH2   | 691  | 782  | 6.35077059747 |
| NM_004456 | EZH2   | 2442 | 2585 | 7.93573309819 |
| NM_004456 | EZH2   | 250  | 386  | 6.35077059747 |
| NM_004456 | EZH2   | 542  | 648  | 5.35076386642 |
| NM_004186 | SEMA3F | 338  | 412  | 9.69847611332 |
| NM_004186 | SEMA3F | 1741 | 1797 | 8.11333986228 |
| NM_004186 | SEMA3F | 418  | 459  | 9.11351337668 |
| NM_004186 | SEMA3F | 520  | 573  | 9.10949601242 |
| NM_004186 | SEMA3F | 1067 | 1133 | 9.02937440321 |
| NM_004186 | SEMA3F | 2891 | 3001 | 9.11351361259 |
| NM_004186 | SEMA3F | 1191 | 1330 | 10.9208685347 |
| NM_004186 | SEMA3F | 959  | 1051 | 10.1133398623 |
| NM_004186 | SEMA3F | 2145 | 2264 | 10.4354417075 |
| NM_004187 | KDM5C  | 5243 | 5294 | 8.35982069239 |
| NM_004187 | KDM5C  | 2807 | 2857 | 8.35982069216 |
| NM_004187 | KDM5C  | 2352 | 2414 | 9.35982069239 |
| NM_004187 | KDM5C  | 5348 | 5422 | 7.35982069238 |
| NM_004187 | KDM5C  | 4260 | 4300 | 6.275681483   |
| NM_004187 | KDM5C  | 3905 | 3949 | 7.94460944279 |
| NM_004187 | KDM5C  | 2430 | 2478 | 7.275681483   |
| NM_004187 | KDM5C  | 3367 | 3422 | 7.35982069216 |
| NM_004187 | KDM5C  | 2504 | 2555 | 6.35964694207 |
| NM_004187 | KDM5C  | 1697 | 1736 | 6.35580309221 |
| NM_004187 | KDM5C  | 4559 | 4642 | 7.35964694207 |
| NM_004187 | KDM5C  | 2885 | 2972 | 6.35982069239 |
| NM_004187 | KDM5C  | 5127 | 5184 | 7.35982068484 |
| NM_004187 | KDM5C  | 1745 | 1868 | 9.35982069239 |
| NM_004187 | KDM5C  | 2663 | 2766 | 8.68174878727 |



|              |          |      |      |                    |
|--------------|----------|------|------|--------------------|
| NM_004187    | KDM5C    | 1142 | 1239 | 7.35981396133      |
| NM_004187    | KDM5C    | 1468 | 1571 | 8.35982069239      |
| NM_004187    | KDM5C    | 2038 | 2204 | 9.35982069239      |
| NM_004187    | KDM5C    | 4381 | 4502 | 9.16717561444      |
| NM_004187    | KDM5C    | 4060 | 4206 | 7.94478319311      |
| NM_004187    | KDM5C    | 673  | 795  | 8.35982069239      |
| NM_004187    | KDM5C    | 1572 | 1635 | 6.35982069216      |
| NM_004187    | KDM5C    | 3716 | 3841 | 7.94478319311      |
| NM_004185    | WNT2B    | 1478 | 1500 | 11.2273065935      |
| NM_004182    | UXT      | 118  | 257  | 6.57448490316      |
| NM_004182    | UXT      | 257  | 431  | 7.46756969924      |
| NM_001033522 | CSTF1    | 1567 | 1644 | 5.14471776191      |
| NM_001033522 | CSTF1    | 1151 | 1199 | 5.14454401159      |
| NM_001033522 | CSTF1    | 1446 | 1552 | 6.14471775436      |
| NM_001033522 | CSTF1    | 851  | 925  | 6.72968026262      |
| NM_001135920 | KIAA1432 |      | 2517 | 2583 8.44623945422 |
| NM_001135920 | KIAA1432 |      | 2967 | 3011 8.446239454   |
| NM_001135920 | KIAA1432 |      | 969  | 1020 9.4460657039  |
| NM_001135920 | KIAA1432 |      | 3291 | 3395 7.44222185405 |
| NM_144982    | ZFC3H1   | 6894 | 6957 | 7.23330697017      |
| NM_144982    | ZFC3H1   | 6638 | 6702 | 6.3174394485       |
| NM_144982    | ZFC3H1   | 6518 | 6602 | 6.31727242924      |
| NM_182767    | SLC6A15  | 1603 | 1647 | 13.4614948667      |
| NM_182767    | SLC6A15  | 1050 | 1102 | 11.876532366       |
| NM_182767    | SLC6A15  | 1676 | 1725 | 11.8726885161      |
| NM_182767    | SLC6A15  | 1188 | 1309 | 14.8767061163      |
| NM_182767    | SLC6A15  | 821  | 913  | 13.8767061163      |
| NM_182767    | SLC6A15  | 1108 | 1187 | 13.8767061161      |
| NM_182767    | SLC6A15  | 926  | 1011 | 13.8767061163      |
| NM_182767    | SLC6A15  | 1931 | 2144 | 15.9641689575      |
| NM_182767    | SLC6A15  | 225  | 362  | 13.8767061163      |
| NM_182767    | SLC6A15  | 1507 | 1578 | 13.8766993852      |
| NM_182767    | SLC6A15  | 519  | 691  | 13.8767061163      |
| NM_182767    | SLC6A15  | 2258 | 2515 | 15.6840610384      |
| NM_000512    | GALNS    | 928  | 994  | 8.14545612809      |
| NM_000512    | GALNS    | 1860 | 1919 | 8.14528261369      |
| NM_000512    | GALNS    | 876  | 923  | 7.06131715462      |
| NM_000512    | GALNS    | 1205 | 1318 | 9.14545636401      |
| NM_030961    | TRIM56   | 1792 | 1846 | 8.36051015443      |
| NM_030961    | TRIM56   | 829  | 903  | 9.94949025532      |
| NM_030961    | TRIM56   | 2268 | 2304 | 9.28038854522      |
| NM_030961    | TRIM56   | 2795 | 2846 | 8.36051015443      |
| NM_030961    | TRIM56   | 40   | 98   | 8.36452751868      |
| NM_030961    | TRIM56   | 1672 | 1756 | 8.36452102355      |
| NM_030961    | TRIM56   | 3286 | 3377 | 8.3645277546       |
| NM_006965    | ZNF24    | 4727 | 4790 | 5.87232984359      |
| NM_006965    | ZNF24    | 164  | 205  | 4.87232984359      |
| NM_006965    | ZNF24    | 3233 | 3306 | 5.87634720785      |
| NM_006965    | ZNF24    | 358  | 430  | 4.87634720785      |
| NM_006965    | ZNF24    | 4844 | 4909 | 4.87634720785      |

|              |         |      |      |                 |
|--------------|---------|------|------|-----------------|
| NM_030969    | TMEM14B | 378  | 442  | 6.83756772239   |
| NM_030969    | TMEM14B | 444  | 510  | 4.51546587719   |
| NM_030969    | TMEM14B | 888  | 939  | 5.51546587719   |
| NM_030969    | TMEM14B | 196  | 360  | 7.32299454956   |
| NM_030969    | TMEM14B | 74   | 174  | 5.5156396275    |
| NM_001142276 | APLP2   | 3692 | 3736 | 2.04022492169   |
| NM_001142276 | APLP2   | 723  | 824  | 3.21014992314   |
| NM_001142276 | APLP2   | 189  | 247  | 2.04022492169   |
| NM_001142276 | APLP2   | 71   | 151  | 0.0402249216939 |
| NM_001142276 | APLP2   | 831  | 1098 | 4.79511242386   |
| NM_001142276 | APLP2   | 3122 | 3354 | 4.56378687775   |
| NM_001142276 | APLP2   | 2440 | 2608 | 4.89820591682   |
| NM_001142276 | APLP2   | 2876 | 3120 | 4.21014992314   |
| NM_001142276 | APLP2   | 1524 | 1814 | 5.39777692631   |
| NM_001142276 | APLP2   | 251  | 719  | 5.79511242386   |
| NM_001142276 | APLP2   | 1170 | 1494 | 5.32562714056   |
| NM_001142276 | APLP2   | 2643 | 2846 | 4.68408111147   |
| NM_001142276 | APLP2   | 1819 | 2439 | 5.99442123208   |
| NM_001142276 | APLP2   | 3394 | 3677 | 4.62518742242   |
| NM_006969    | ZNF28   | 932  | 1000 | 10.0462102622   |
| NM_001609    | ACADSB  | 3704 | 3765 | 3.36719764674   |
| NM_004238    | TRIP12  | 607  | 682  | 4.05219136349   |
| NM_004238    | TRIP12  | 2332 | 2411 | 6.63715387176   |
| NM_004238    | TRIP12  | 2997 | 3058 | 5.05219136349   |
| NM_004238    | TRIP12  | 6723 | 6780 | 4.05218463999   |
| NM_004238    | TRIP12  | 2770 | 2844 | 7.05219137104   |
| NM_004238    | TRIP12  | 753  | 835  | 6.05219137104   |
| NM_004238    | TRIP12  | 1540 | 1594 | 6.05219113512   |
| NM_004238    | TRIP12  | 4107 | 4173 | 6.05219137104   |
| NM_004238    | TRIP12  | 1856 | 1927 | 4.05219137104   |
| NM_004238    | TRIP12  | 503  | 571  | 5.63715387154   |
| NM_004238    | TRIP12  | 4183 | 4227 | 5.05219113512   |
| NM_004238    | TRIP12  | 9763 | 9805 | 4.04817377087   |
| NM_004238    | TRIP12  | 5275 | 5335 | 5.63714714071   |
| NM_004238    | TRIP12  | 1418 | 1463 | 5.05219137104   |
| NM_004238    | TRIP12  | 4828 | 4883 | 4.96805216166   |
| NM_004238    | TRIP12  | 4897 | 5018 | 5.63715363585   |
| NM_004238    | TRIP12  | 5618 | 5681 | 5.05201762073   |
| NM_004238    | TRIP12  | 1668 | 1693 | 5.04817377087   |
| NM_004238    | TRIP12  | 6443 | 6508 | 5.63715386422   |
| NM_004238    | TRIP12  | 1699 | 1738 | 5.63715387154   |
| NM_004238    | TRIP12  | 1597 | 1642 | 4.04817377087   |
| NM_004238    | TRIP12  | 5346 | 5608 | 8.05219137104   |
| NM_004238    | TRIP12  | 935  | 979  | 5.63715363585   |
| NM_004238    | TRIP12  | 3657 | 3728 | 5.05219137104   |
| NM_004238    | TRIP12  | 5019 | 5156 | 6.8595462931    |
| NM_004238    | TRIP12  | 2604 | 2677 | 5.63715387176   |
| NM_004238    | TRIP12  | 6221 | 6296 | 4.05219137104   |
| NM_004238    | TRIP12  | 2106 | 2285 | 7.63715387176   |
| NM_004238    | TRIP12  | 6601 | 6665 | 7.05201762073   |

|           |        |      |      |               |
|-----------|--------|------|------|---------------|
| NM_004238 | TRIP12 | 2423 | 2521 | 5.63715387176 |
| NM_004238 | TRIP12 | 212  | 296  | 5.05219137104 |
| NM_004238 | TRIP12 | 3087 | 3270 | 5.63715387176 |
| NM_004238 | TRIP12 | 5787 | 5870 | 6.63715387176 |
| NM_004238 | TRIP12 | 9321 | 9396 | 5.05219137082 |
| NM_004238 | TRIP12 | 5908 | 6105 | 7.37411946593 |
| NM_004238 | TRIP12 | 3970 | 4102 | 6.37411946593 |
| NM_004238 | TRIP12 | 4264 | 4390 | 6.05219137104 |
| NM_004238 | TRIP12 | 1778 | 1822 | 4.96805216166 |
| NM_004238 | TRIP12 | 3420 | 3631 | 7.22211637249 |
| NM_004238 | TRIP12 | 992  | 1074 | 5.63715387154 |
| NM_004238 | TRIP12 | 1149 | 1265 | 4.05219137104 |
| NM_004236 | COPS2  | 1464 | 1506 | 3.34763386264 |
| NM_004236 | COPS2  | 865  | 913  | 3.42775547185 |
| NM_004236 | COPS2  | 461  | 522  | 3.43177306447 |
| NM_004236 | COPS2  | 110  | 177  | 4.4315993217  |
| NM_004985 | KRAS   | 2060 | 2155 | 6.39977032011 |
| NM_004985 | KRAS   | 2887 | 2930 | 5.39976358906 |
| NM_004985 | KRAS   | 2525 | 2573 | 6.98473282083 |
| NM_004985 | KRAS   | 3516 | 3571 | 6.98473282061 |
| NM_004985 | KRAS   | 2695 | 2744 | 5.39976358906 |
| NM_004985 | KRAS   | 338  | 385  | 5.31563111073 |
| NM_004985 | KRAS   | 2623 | 2678 | 7.72169840745 |
| NM_001606 | ABCA2  | 164  | 226  | 8.37783710557 |
| NM_001606 | ABCA2  | 5627 | 5689 | 8.3778371058  |
| NM_001606 | ABCA2  | 6877 | 6930 | 7.37766335548 |
| NM_001606 | ABCA2  | 6209 | 6247 | 8.37381950562 |
| NM_001606 | ABCA2  | 5165 | 5208 | 8.95878200634 |
| NM_001606 | ABCA2  | 3423 | 3497 | 7.37783710557 |
| NM_001606 | ABCA2  | 5868 | 5985 | 9.3778371058  |
| NM_001606 | ABCA2  | 7187 | 7258 | 7.37381950562 |
| NM_001606 | ABCA2  | 6959 | 7044 | 7.3778371058  |
| NM_001606 | ABCA2  | 5714 | 5785 | 8.37783037474 |
| NM_001606 | ABCA2  | 1912 | 2050 | 8.3778371058  |
| NM_001606 | ABCA2  | 3583 | 3658 | 8.95878200634 |
| NM_001606 | ABCA2  | 3253 | 3348 | 8.37783686988 |
| NM_001606 | ABCA2  | 2232 | 2297 | 8.37783037474 |
| NM_001607 | ACAA1  | 461  | 528  | 5.18813573952 |
| NM_001607 | ACAA1  | 409  | 455  | 3.18813551115 |
| NM_001607 | ACAA1  | 1182 | 1238 | 3.18813551115 |
| NM_004232 | SOCS6  | 929  | 969  | 7.15882249232 |
| NM_001605 | AARS   | 2147 | 2198 | 2.99578064142 |
| NM_001605 | AARS   | 2869 | 2971 | 3.99578064142 |
| NM_001605 | AARS   | 3034 | 3121 | 3.99578064142 |
| NM_001605 | AARS   | 3168 | 3325 | 6.58074314214 |
| NM_001605 | AARS   | 1571 | 1788 | 6.31770873631 |
| NM_001605 | AARS   | 2203 | 2393 | 6.90267123703 |
| NM_001605 | AARS   | 71   | 179  | 5.58074314214 |
| NM_001605 | AARS   | 1190 | 1545 | 7.31770873631 |
| NM_001605 | AARS   | 2727 | 2853 | 4.99578064142 |

|              |          |      |      |               |               |
|--------------|----------|------|------|---------------|---------------|
| NM_001605    | AARS     | 1792 | 2095 | 7.08324348267 |               |
| NM_001605    | AARS     | 667  | 942  | 7.6396368312  |               |
| NM_001605    | AARS     | 943  | 1133 | 5.99578064142 |               |
| NM_001605    | AARS     | 186  | 603  | 8.24370815487 |               |
| NM_001605    | AARS     | 2400 | 2679 | 6.80313556348 |               |
| NM_022845    | CBFB     | 2318 | 2362 | 5.33069591364 |               |
| NM_022845    | CBFB     | 544  | 658  | 6.06766823886 |               |
| NM_022845    | CBFB     | 1611 | 1678 | 3.74574014398 |               |
| NM_022845    | CBFB     | 1065 | 1140 | 4.74574013643 |               |
| NM_022845    | CBFB     | 303  | 338  | 4.74574014375 |               |
| NM_022845    | CBFB     | 2487 | 2557 | 4.74574013643 |               |
| NM_032833    | PPP1R15B |      | 973  | 1045          | 8.03538819166 |
| NM_032833    | PPP1R15B |      | 662  | 708           | 7.03137059149 |
| NM_032833    | PPP1R15B |      | 1668 | 1761          | 7.03538146061 |
| NM_032833    | PPP1R15B |      | 1265 | 1328          | 8.03538795574 |
| NM_032833    | PPP1R15B |      | 1058 | 1116          | 6.03538146061 |
| NM_032833    | PPP1R15B |      | 3270 | 3341          | 7.62034396133 |
| NM_032833    | PPP1R15B |      | 4159 | 4226          | 6.03538146061 |
| NM_032833    | PPP1R15B |      | 1931 | 1999          | 6.03538146061 |
| NM_032833    | PPP1R15B |      | 1126 | 1170          | 5.95124898228 |
| NM_032833    | PPP1R15B |      | 1838 | 1919          | 6.03538146061 |
| NM_032833    | PPP1R15B |      | 535  | 649           | 7.03538819166 |
| NM_032833    | PPP1R15B |      | 126  | 504           | 9.35731628655 |
| NM_032832    | LRP11    | 3271 | 3365 | 7.16945544847 |               |
| NM_032832    | LRP11    | 1883 | 1919 | 7.16944871742 |               |
| NM_032832    | LRP11    | 1144 | 1191 | 7.1654378483  |               |
| NM_032832    | LRP11    | 1078 | 1142 | 7.16945544092 |               |
| NM_032832    | LRP11    | 1330 | 1382 | 8.16945544825 |               |
| NM_032832    | LRP11    | 1036 | 1075 | 7.75040034902 |               |
| NM_032832    | LRP11    | 1728 | 1821 | 8.16945544847 |               |
| NM_032830    | CIRH1A   | 1238 | 1312 | 7.28157462218 |               |
| NM_032830    | CIRH1A   | 433  | 491  | 6.47421970012 |               |
| NM_032830    | CIRH1A   | 1314 | 1389 | 6.47421970012 |               |
| NM_032830    | CIRH1A   | 1651 | 1690 | 5.47020209995 |               |
| NM_032830    | CIRH1A   | 511  | 566  | 5.97504299146 |               |
| NM_032830    | CIRH1A   | 1395 | 1455 | 5.47421970012 |               |
| NM_032830    | CIRH1A   | 1129 | 1185 | 6.79614779479 |               |
| NM_032830    | CIRH1A   | 636  | 694  | 6.05918220085 |               |
| NM_032830    | CIRH1A   | 183  | 232  | 5.97504299146 |               |
| NM_032830    | CIRH1A   | 2018 | 2098 | 6.79614779501 |               |
| NM_032830    | CIRH1A   | 136  | 178  | 4.47020209995 |               |
| NM_032830    | CIRH1A   | 253  | 339  | 6.47421946421 |               |
| NM_032830    | CIRH1A   | 341  | 420  | 6.05918220085 |               |
| NM_032830    | CIRH1A   | 1697 | 1856 | 6.79614779501 |               |
| NM_032830    | CIRH1A   | 2106 | 2220 | 6.05918220085 |               |
| NM_032839    | DIRC2    | 431  | 542  | 10.6815515664 |               |
| NM_032839    | DIRC2    | 1068 | 1189 | 10.4185171606 |               |
| NM_032839    | DIRC2    | 323  | 376  | 8.09658906572 |               |
| NM_032839    | DIRC2    | 579  | 659  | 10.0965890655 |               |
| NM_001037328 | STAU1    | 1885 | 1935 | 4.4510212976  |               |

|              |        |      |      |               |
|--------------|--------|------|------|---------------|
| NM_001037328 | STAU1  | 2565 | 2616 | 4.8662325472  |
| NM_001037328 | STAU1  | 2924 | 2983 | 4.45119504791 |
| NM_001037328 | STAU1  | 897  | 971  | 4.86221494702 |
| NM_001037328 | STAU1  | 1411 | 1463 | 2.86221494702 |
| NM_001037328 | STAU1  | 708  | 773  | 2.86622581614 |
| NM_001037328 | STAU1  | 2992 | 3079 | 4.8662325472  |
| NM_001037328 | STAU1  | 3427 | 3521 | 2.86623254697 |
| NM_001037328 | STAU1  | 2476 | 2564 | 4.8662325472  |
| NM_001037328 | STAU1  | 2651 | 2702 | 4.45118831686 |
| NM_001037328 | STAU1  | 1104 | 1148 | 3.86221494702 |
| NM_001037328 | STAU1  | 2350 | 2416 | 3.86605879688 |
| NM_001037328 | STAU1  | 600  | 704  | 5.18816064208 |
| NM_001037328 | STAU1  | 2030 | 2197 | 5.18816064208 |
| NM_001037328 | STAU1  | 1937 | 2003 | 3.8662325472  |
| NM_001037328 | STAU1  | 3084 | 3287 | 6.03615754864 |
| NM_001037328 | STAU1  | 1682 | 1875 | 5.8662325472  |
| NM_001037328 | STAU1  | 453  | 559  | 5.67358746925 |
| NM_001037328 | STAU1  | 1478 | 1588 | 2.8662325472  |
| NM_001037328 | STAU1  | 2748 | 2835 | 4.45119504791 |
| NM_174907    | PPP4R2 | 316  | 410  | 5.76241620747 |
| NM_174907    | PPP4R2 | 131  | 195  | 6.34737870797 |
| NM_174907    | PPP4R2 | 415  | 471  | 5.76224245715 |
| NM_174907    | PPP4R2 | 207  | 257  | 6.34737197714 |
| NM_174907    | PPP4R2 | 1053 | 1117 | 4.75839860729 |
| NM_015891    | CDC40  | 2820 | 2890 | 6.27942616343 |
| NM_015891    | CDC40  | 1192 | 1248 | 6.27942616343 |
| NM_015891    | CDC40  | 894  | 974  | 6.86840625678 |
| NM_015891    | CDC40  | 1269 | 1319 | 6.28327001329 |
| NM_007189    | ABCF2  | 1471 | 1523 | 6.86814628833 |
| NM_007189    | ABCF2  | 305  | 363  | 4.86814628833 |
| NM_007189    | ABCF2  | 1328 | 1384 | 5.8721638885  |
| NM_007189    | ABCF2  | 1546 | 1631 | 6.8721638885  |
| NM_007189    | ABCF2  | 395  | 503  | 7.45712638922 |
| NM_007189    | ABCF2  | 533  | 593  | 5.87216388095 |
| NM_007189    | ABCF2  | 2132 | 2197 | 4.87199013819 |
| NM_007189    | ABCF2  | 602  | 712  | 7.19409198339 |
| NM_007189    | ABCF2  | 2982 | 3099 | 6.45712638922 |
| NM_007189    | ABCF2  | 1634 | 1784 | 7.45712638922 |
| NM_007189    | ABCF2  | 781  | 825  | 4.78802467912 |
| NM_007189    | ABCF2  | 826  | 933  | 6.45712638922 |
| NM_007189    | ABCF2  | 1014 | 1292 | 8.57260360664 |
| NM_007189    | ABCF2  | 2791 | 2865 | 5.87216388095 |
| NM_007189    | ABCF2  | 2280 | 2414 | 8.04208888995 |
| NM_007188    | ABCB8  | 646  | 687  | 10.5462351259 |
| NM_007188    | ABCB8  | 170  | 218  | 8.88115101596 |
| NM_007188    | ABCB8  | 437  | 473  | 8.96127262518 |
| NM_007188    | ABCB8  | 502  | 624  | 8.96529022534 |
| NM_016570    | ERGIC2 | 118  | 159  | 6.52542835428 |
| NM_016570    | ERGIC2 | 1012 | 1158 | 6.52543508534 |
| NM_016570    | ERGIC2 | 361  | 450  | 7.52543507779 |

|              |         |      |      |               |
|--------------|---------|------|------|---------------|
| NM_016570    | ERGIC2  | 777  | 847  | 7.11039085501 |
| NM_007186    | CEP250  | 7653 | 7694 | 4.30279311901 |
| NM_007186    | CEP250  | 1202 | 1273 | 5.30681071163 |
| NM_007186    | CEP250  | 450  | 525  | 5.30663696886 |
| NM_007184    | NISCH   | 4748 | 4792 | 7.95539037664 |
| NM_007184    | NISCH   | 3991 | 4066 | 8.9553838815  |
| NM_007184    | NISCH   | 2249 | 2292 | 8.87125140317 |
| NM_007184    | NISCH   | 4989 | 5076 | 7.95539061255 |
| NM_007184    | NISCH   | 4891 | 4954 | 8.9553838815  |
| NM_014240    | LIMD1   | 5530 | 5588 | 9.48016497486 |
| NM_001012478 | U2AF2   | 375  | 459  | 5.36017414577 |
| NM_001012478 | U2AF2   | 1407 | 1464 | 4.36017414577 |
| NM_001012478 | U2AF2   | 1089 | 1170 | 3.36017414577 |
| NM_001012478 | U2AF2   | 2425 | 2474 | 5.36017414577 |
| NM_001012478 | U2AF2   | 2577 | 2628 | 3.36000039545 |
| NM_001012478 | U2AF2   | 106  | 185  | 5.36017414576 |
| NM_001012478 | U2AF2   | 2788 | 3069 | 8.26706474138 |
| NM_001012478 | U2AF2   | 216  | 366  | 6.53009914721 |
| NM_001012478 | U2AF2   | 1225 | 1373 | 5.94513664649 |
| NM_001012478 | U2AF2   | 492  | 773  | 7.16752906782 |
| NM_001012478 | U2AF2   | 1504 | 1583 | 4.94513664627 |
| NM_001012478 | U2AF2   | 1589 | 2417 | 9.62696068646 |
| NM_014713    | LAPTM4A | 505  | 547  | 3.69001419771 |
| NM_014713    | LAPTM4A | 1321 | 1393 | 5.77415340709 |
| NM_014713    | LAPTM4A | 397  | 500  | 6.23358502573 |
| NM_014713    | LAPTM4A | 1494 | 1702 | 7.29771536315 |
| NM_014713    | LAPTM4A | 578  | 1321 | 10.2417589572 |
| NM_017495    | RBM38   | 1072 | 1159 | 9.34252256767 |
| NM_017495    | RBM38   | 1328 | 1396 | 9.66445066988 |
| NM_017990    | PDPR    | 1929 | 2037 | 9.01351879884 |
| NM_017990    | PDPR    | 3706 | 3782 | 8.69159070395 |
| NM_017990    | PDPR    | 927  | 1008 | 9.27655320467 |
| NM_017990    | PDPR    | 6135 | 6186 | 7.60745149457 |
| NM_017990    | PDPR    | 6901 | 6944 | 7.60745149457 |
| NM_017990    | PDPR    | 2909 | 2974 | 7.69159046803 |
| NM_017990    | PDPR    | 3236 | 3290 | 8.27655296875 |
| NM_017990    | PDPR    | 5030 | 5079 | 8.2725356045  |
| NM_017990    | PDPR    | 2462 | 2546 | 7.69159070373 |
| NM_017990    | PDPR    | 5940 | 5995 | 8.27637945435 |
| NM_017990    | PDPR    | 4172 | 4206 | 7.6915839729  |
| NM_017990    | PDPR    | 3629 | 3706 | 7.69159070373 |
| NM_017990    | PDPR    | 2198 | 2237 | 6.60745149457 |
| NM_017990    | PDPR    | 3782 | 3825 | 8.69141695363 |
| NM_017990    | PDPR    | 3546 | 3598 | 6.60745149457 |
| NM_017990    | PDPR    | 1799 | 1861 | 8.27654647362 |
| NM_017990    | PDPR    | 2058 | 2136 | 7.69159046803 |
| NM_017990    | PDPR    | 5121 | 5199 | 8.69159070395 |
| NM_017990    | PDPR    | 2380 | 2458 | 8.27655320467 |
| NM_017990    | PDPR    | 6208 | 6311 | 8.27655320467 |
| NM_017990    | PDPR    | 2669 | 2740 | 6.69159070395 |

|              |           |      |      |                   |
|--------------|-----------|------|------|-------------------|
| NM_017990    | PDPR      | 1302 | 1427 | 8.27655320467     |
| NM_017990    | PDPR      | 6655 | 6730 | 6.6915839729      |
| NM_017990    | PDPR      | 2832 | 2903 | 6.69159046803     |
| NM_017990    | PDPR      | 3373 | 3445 | 7.6915839729      |
| NM_183419    | RNF19A    | 831  | 922  | 3.16809191582     |
| NM_183419    | RNF19A    | 2523 | 2592 | 4.75288739728     |
| NM_183419    | RNF19A    | 3745 | 3795 | 3.1640810467      |
| NM_183419    | RNF19A    | 663  | 760  | 4.75306114737     |
| NM_183419    | RNF19A    | 303  | 414  | 4.16809191582     |
| NM_183419    | RNF19A    | 973  | 1076 | 4.7530611476      |
| NM_183419    | RNF19A    | 1633 | 1784 | 4.7530611476      |
| NM_017994    | C7orf42   | 2644 | 2710 | 9.02904885965     |
| NM_017994    | C7orf42   | 3984 | 4029 | 8.02904213614     |
| NM_017994    | C7orf42   | 3755 | 3808 | 8.02904863128     |
| NM_017994    | C7orf42   | 4117 | 4177 | 6.44391261616     |
| NM_017994    | C7orf42   | 1964 | 2006 | 7.94490965781     |
| NM_017994    | C7orf42   | 1081 | 1139 | 7.44391261616     |
| NM_017994    | C7orf42   | 3239 | 3297 | 6.44408613055     |
| NM_017994    | C7orf42   | 1153 | 1204 | 7.44408635892     |
| NM_017994    | C7orf42   | 2232 | 2277 | 7.44407963542     |
| NM_017994    | C7orf42   | 2483 | 2522 | 6.35994715709     |
| NM_017994    | C7orf42   | 1831 | 1873 | 6.44408636625     |
| NM_017994    | C7orf42   | 2741 | 2793 | 7.44407963542     |
| NM_017994    | C7orf42   | 557  | 722  | 9.90351798511     |
| NM_017994    | C7orf42   | 1211 | 1326 | 9.61401136792     |
| NM_017994    | C7orf42   | 834  | 956  | 8.44408636647     |
| NM_017994    | C7orf42   | 1329 | 1531 | 10.2514412885     |
| NM_017994    | C7orf42   | 974  | 1057 | 8.76601446136     |
| NM_017994    | C7orf42   | 729  | 827  | 9.25144128853     |
| NM_017994    | C7orf42   | 3820 | 3983 | 9.02904886719     |
| NM_017994    | C7orf42   | 1531 | 1654 | 10.0290488672     |
| NM_017994    | C7orf42   | 258  | 556  | 11.0290488672     |
| NM_017994    | C7orf42   | 2864 | 2986 | 8.02904886719     |
| NM_017999    | RNF31     | 1506 | 1525 | 7.03541633242     |
| NM_017999    | RNF31     | 2372 | 2441 | 7.62037883314     |
| NM_017999    | RNF31     | 3017 | 3093 | 6.11955554158     |
| NM_001167990 | PQBP1     | 667  | 700  | 3.3699961906      |
| NM_001167990 | PQBP1     | 190  | 230  | 3.45011779981     |
| NM_001167990 | PQBP1     | 255  | 354  | 4.45413539998     |
| NM_138720    | HIST1H2BD |      | 22   | 277 10.5635425326 |
| NM_203372    | ACSL3     | 21   | 65   | 2.51650426757     |
| NM_203372    | ACSL3     | 168  | 408  | 5.45527747323     |
| NM_203372    | ACSL3     | 941  | 1084 | 4.39114713581     |
| NM_203372    | ACSL3     | 451  | 701  | 6.17964303061     |
| NM_203372    | ACSL3     | 3527 | 3564 | 1.93154176685     |
| NM_203372    | ACSL3     | 2448 | 2671 | 5.10164051861     |
| NM_203372    | ACSL3     | 3217 | 3302 | 2.93171550962     |
| NM_203372    | ACSL3     | 2673 | 2784 | 4.73907043923     |
| NM_203372    | ACSL3     | 1933 | 2444 | 6.76460553133     |
| NM_203372    | ACSL3     | 78   | 147  | 2.51667801789     |

|              |        |       |       |               |
|--------------|--------|-------|-------|---------------|
| NM_203372    | ACSL3  | 1447  | 1922  | 7.25364361206 |
| NM_203372    | ACSL3  | 710   | 899   | 4.93171551717 |
| NM_203372    | ACSL3  | 1166  | 1447  | 6.21711773603 |
| NM_203372    | ACSL3  | 2812  | 3053  | 2.93171551717 |
| NM_001184979 | NDUFS5 | 415   | 506   | 2.90814491343 |
| NM_001184979 | NDUFS5 | 127   | 381   | 4.23007300832 |
| NM_002111    | HTT    | 12907 | 12943 | 8.26314909485 |
| NM_002111    | HTT    | 6928  | 6968  | 6.68219746324 |
| NM_002111    | HTT    | 13429 | 13510 | 6.67818659413 |
| NM_002111    | HTT    | 6350  | 6391  | 6.67818659413 |
| NM_002111    | HTT    | 3005  | 3055  | 7.6822041943  |
| NM_002111    | HTT    | 7672  | 7721  | 6.67818659413 |
| NM_002111    | HTT    | 944   | 1012  | 7.68219746324 |
| NM_002111    | HTT    | 9554  | 9628  | 8.6822041943  |
| NM_002111    | HTT    | 6189  | 6221  | 7.59806498491 |
| NM_002111    | HTT    | 6032  | 6065  | 7.67818659413 |
| NM_002111    | HTT    | 2252  | 2311  | 8.2669929447  |
| NM_002111    | HTT    | 7063  | 7107  | 8.26314909485 |
| NM_002111    | HTT    | 6680  | 6740  | 6.68203044398 |
| NM_002111    | HTT    | 3593  | 3661  | 6.59806498491 |
| NM_002111    | HTT    | 5585  | 5626  | 6.59806498491 |
| NM_002111    | HTT    | 8740  | 8803  | 6.59806498491 |
| NM_002111    | HTT    | 9013  | 9086  | 6.67818659413 |
| NM_002111    | HTT    | 1833  | 1871  | 6.59806498491 |
| NM_002111    | HTT    | 2752  | 2835  | 8.68220419429 |
| NM_002111    | HTT    | 2540  | 2609  | 6.6822041943  |
| NM_002111    | HTT    | 2329  | 2371  | 8.26715996397 |
| NM_002111    | HTT    | 8465  | 8539  | 6.68203044398 |
| NM_002111    | HTT    | 13103 | 13159 | 6.68219746324 |
| NM_002111    | HTT    | 1470  | 1517  | 6.59806498491 |
| NM_002111    | HTT    | 8809  | 8886  | 8.26716669502 |
| NM_002111    | HTT    | 3433  | 3485  | 6.59806498491 |
| NM_002111    | HTT    | 12142 | 12187 | 8.26314909485 |
| NM_002111    | HTT    | 4103  | 4270  | 9.00413228919 |
| NM_002111    | HTT    | 2847  | 2907  | 7.59806498491 |
| NM_002111    | HTT    | 8678  | 8730  | 8.26716669501 |
| NM_002111    | HTT    | 9270  | 9330  | 6.68220395838 |
| NM_002111    | HTT    | 2040  | 2143  | 7.68203044398 |
| NM_002111    | HTT    | 5306  | 5438  | 9.00413228919 |
| NM_002111    | HTT    | 7861  | 7944  | 6.68219746324 |
| NM_002111    | HTT    | 6414  | 6519  | 7.6822041943  |
| NM_002111    | HTT    | 673   | 772   | 8.26716669502 |
| NM_002111    | HTT    | 1069  | 1278  | 8.26716669502 |
| NM_002111    | HTT    | 10441 | 10527 | 7.6822041943  |
| NM_002111    | HTT    | 8388  | 8459  | 7.68219746324 |
| NM_002111    | HTT    | 4807  | 4893  | 6.68220419429 |
| NM_002111    | HTT    | 1663  | 1754  | 8.26716669501 |
| NM_001242778 | IKBKB  | 2843  | 2913  | 6.0498096829  |
| NM_002117    | HLA-C  | 613   | 676   | 4.40460831511 |
| NM_002117    | HLA-C  | 199   | 253   | 3.4044345648  |



|              |         |      |      |               |
|--------------|---------|------|------|---------------|
| NM_002117    | HLA-C   | 1054 | 1397 | 6.72653641    |
| NM_002117    | HLA-C   | 467  | 543  | 4.98957081584 |
| NM_002117    | HLA-C   | 300  | 458  | 4.98957081584 |
| NM_002117    | HLA-C   | 721  | 835  | 4.40460831511 |
| NM_002116    | HLA-A   | 998  | 1106 | 6.58851522654 |
| NM_002116    | HLA-A   | 1334 | 1510 | 7.87802184374 |
| NM_002116    | HLA-A   | 493  | 578  | 5.4185902251  |
| NM_002116    | HLA-A   | 1113 | 1321 | 8.22594514716 |
| NM_002116    | HLA-A   | 641  | 710  | 4.4185902251  |
| NM_002116    | HLA-A   | 733  | 933  | 6.00355272582 |
| NM_002116    | HLA-A   | 80   | 493  | 7.50605306635 |
| NM_001184971 | PACSIN2 | 1742 | 1801 | 4.36514800098 |
| NM_001184971 | PACSIN2 | 1804 | 1887 | 6.17250292303 |
| NM_001184971 | PACSIN2 | 75   | 153  | 5.9501105017  |
| NM_001184971 | PACSIN2 | 1246 | 1315 | 4.95011049415 |
| NM_001184971 | PACSIN2 | 171  | 272  | 5.36514800098 |
| NM_001184971 | PACSIN2 | 895  | 943  | 4.86597129231 |
| NM_001184971 | PACSIN2 | 1674 | 1726 | 3.36514776506 |
| NM_001184971 | PACSIN2 | 458  | 516  | 4.36514126992 |
| NM_001184971 | PACSIN2 | 2149 | 2280 | 4.36514800098 |
| NM_001184971 | PACSIN2 | 1354 | 1458 | 3.36514800098 |
| NM_001184971 | PACSIN2 | 2540 | 2633 | 4.36514800098 |
| NM_001184971 | PACSIN2 | 1888 | 1971 | 5.36514800075 |
| NM_001184971 | PACSIN2 | 2346 | 2491 | 4.9501105017  |
| NM_001184971 | PACSIN2 | 2904 | 2987 | 4.36514800098 |
| NM_001199839 | BCL2L2  | 253  | 296  | 6.07336936568 |
| NM_001199839 | BCL2L2  | 483  | 516  | 7.06952551583 |
| NM_001199839 | BCL2L2  | 1407 | 1444 | 7.06952551583 |
| NM_001199839 | BCL2L2  | 1669 | 1704 | 7.06952551583 |
| NM_001199839 | BCL2L2  | 2147 | 2206 | 7.07353638495 |
| NM_001199839 | BCL2L2  | 1780 | 1873 | 7.07353638495 |
| NM_014718    | CLSTN3  | 1025 | 1071 | 6.10765688575 |
| NM_014718    | CLSTN3  | 259  | 351  | 7.69261938648 |
| NM_014718    | CLSTN3  | 3141 | 3250 | 6.52269438504 |
| NM_014718    | CLSTN3  | 2925 | 3011 | 6.10765688576 |
| NM_014718    | CLSTN3  | 2831 | 2882 | 6.10765688554 |
| NM_014718    | CLSTN3  | 2761 | 2820 | 4.51867678487 |
| NM_014718    | CLSTN3  | 92   | 145  | 4.51867678487 |
| NM_014718    | CLSTN3  | 18   | 61   | 4.52269438482 |
| NM_014718    | CLSTN3  | 3826 | 3914 | 6.10765688576 |
| NM_014718    | CLSTN3  | 2219 | 2301 | 7.69261938648 |
| NM_014718    | CLSTN3  | 3053 | 3095 | 4.51867678487 |
| NM_014718    | CLSTN3  | 2623 | 2715 | 6.10765688554 |
| NM_014718    | CLSTN3  | 1725 | 1792 | 5.52269414912 |
| NM_014718    | CLSTN3  | 858  | 990  | 7.10765688576 |
| NM_014718    | CLSTN3  | 489  | 531  | 4.52269414912 |
| NM_014718    | CLSTN3  | 1572 | 1715 | 7.3300493071  |
| NM_014718    | CLSTN3  | 2019 | 2095 | 6.84462247993 |
| NM_014718    | CLSTN3  | 3544 | 3713 | 6.52269438504 |
| NM_014718    | CLSTN3  | 1394 | 1570 | 8.22313410318 |

|              |         |      |      |               |
|--------------|---------|------|------|---------------|
| NM_014718    | CLSTN3  | 353  | 488  | 7.3300493071  |
| NM_014718    | CLSTN3  | 1894 | 2016 | 5.52269438504 |
| NM_014718    | CLSTN3  | 659  | 852  | 7.52269438504 |
| NM_014718    | CLSTN3  | 1071 | 1313 | 7.52269438504 |
| NM_014718    | CLSTN3  | 2323 | 2609 | 8.52269438504 |
| NM_014321    | ORC6    | 204  | 241  | 6.06681711873 |
| NM_014321    | ORC6    | 552  | 592  | 5.15095609219 |
| NM_014321    | ORC6    | 836  | 935  | 5.15094959706 |
| NM_006585    | CCT8    | 1944 | 1985 | 3.40786906046 |
| NM_006585    | CCT8    | 1128 | 1228 | 5.5777940619  |
| NM_006585    | CCT8    | 265  | 311  | 3.72979691943 |
| NM_006585    | CCT8    | 1228 | 1289 | 4.21522398252 |
| NM_006585    | CCT8    | 1062 | 1121 | 3.72979715535 |
| NM_006585    | CCT8    | 322  | 475  | 4.8673006791  |
| NM_006585    | CCT8    | 1322 | 1934 | 7.49533190171 |
| NM_006585    | CCT8    | 772  | 1039 | 6.1083087786  |
| NM_006585    | CCT8    | 484  | 764  | 5.99283156118 |
| NM_006586    | CNPY3   | 1643 | 1713 | 2.79394079    |
| NM_006586    | CNPY3   | 1255 | 1321 | 4.37890329072 |
| NM_006586    | CNPY3   | 872  | 929  | 2.79394055408 |
| NM_006586    | CNPY3   | 1389 | 1501 | 4.79394079    |
| NM_006586    | CNPY3   | 449  | 522  | 4.37889655966 |
| NM_006586    | CNPY3   | 552  | 635  | 5.11586888488 |
| NM_006586    | CNPY3   | 657  | 805  | 5.60129571205 |
| NM_001099402 | CCNK    | 187  | 253  | 7.13921034634 |
| NM_001099402 | CCNK    | 2033 | 2108 | 5.55424808154 |
| NM_001099402 | CCNK    | 405  | 476  | 5.55023048137 |
| NM_006588    | SULT1C4 | 317  | 367  | 6.46370139671 |
| NM_006588    | SULT1C4 | 603  | 669  | 6.3835797875  |
| NM_006588    | SULT1C4 | 468  | 523  | 7.46771226583 |
| NM_006588    | SULT1C4 | 940  | 1042 | 6.46771876096 |
| NM_002804    | PSMC3   | 1115 | 1158 | 5.7538770354  |
| NM_002804    | PSMC3   | 60   | 99   | 5.16489717042 |
| NM_002804    | PSMC3   | 120  | 179  | 4.16489717042 |
| NM_002804    | PSMC3   | 1183 | 1264 | 5.1689147706  |
| NM_002804    | PSMC3   | 813  | 875  | 5.16891477059 |
| NM_002804    | PSMC3   | 1397 | 1482 | 4.1689147706  |
| NM_002804    | PSMC3   | 323  | 365  | 6.16890803954 |
| NM_002804    | PSMC3   | 1058 | 1113 | 4.1689147706  |
| NM_002804    | PSMC3   | 683  | 796  | 5.75387727132 |
| NM_002804    | PSMC3   | 390  | 621  | 7.97626969266 |
| NM_002804    | PSMC3   | 186  | 292  | 6.49084286549 |
| NM_002804    | PSMC3   | 1317 | 1379 | 5.16890803954 |
| NM_002807    | PSMD1   | 239  | 300  | 6.9867161544  |
| NM_002807    | PSMD1   | 2744 | 2809 | 5.40175341776 |
| NM_002807    | PSMD1   | 2238 | 2283 | 5.98671615418 |
| NM_002807    | PSMD1   | 159  | 214  | 4.3176144443  |
| NM_002807    | PSMD1   | 2425 | 2503 | 6.72368174857 |
| NM_002807    | PSMD1   | 2332 | 2378 | 4.3176144443  |
| NM_002807    | PSMD1   | 2035 | 2078 | 4.3176144443  |

|           |       |      |      |               |
|-----------|-------|------|------|---------------|
| NM_002807 | PSMD1 | 2381 | 2424 | 5.98671614685 |
| NM_002807 | PSMD1 | 1957 | 2032 | 6.40175365368 |
| NM_002807 | PSMD1 | 2526 | 2621 | 6.40175365368 |
| NM_002807 | PSMD1 | 362  | 466  | 6.9867161544  |
| NM_002807 | PSMD1 | 1709 | 1955 | 8.79407107646 |
| NM_002807 | PSMD1 | 730  | 895  | 7.57167865512 |
| NM_002807 | PSMD1 | 1161 | 1307 | 7.40175365368 |
| NM_002807 | PSMD1 | 586  | 714  | 7.72368174857 |
| NM_002807 | PSMD1 | 2105 | 2226 | 7.40175365368 |
| NM_002807 | PSMD1 | 2827 | 3238 | 8.79407107646 |
| NM_002807 | PSMD1 | 896  | 1154 | 8.72368174857 |
| NM_002807 | PSMD1 | 1447 | 1690 | 7.57167865512 |
| NM_002806 | PSMC6 | 1103 | 1165 | 4.78493012319 |
| NM_002806 | PSMC6 | 514  | 702  | 5.27035695036 |
| NM_002806 | PSMC6 | 1174 | 1262 | 4.46300202831 |
| NM_002806 | PSMC6 | 79   | 221  | 4.46300202831 |
| NM_002806 | PSMC6 | 1035 | 1099 | 4.04779077871 |
| NM_002806 | PSMC6 | 721  | 860  | 5.27035695036 |
| NM_002806 | PSMC6 | 909  | 995  | 3.4630020283  |
| NM_002806 | PSMC6 | 252  | 493  | 5.78493012319 |
| NM_002803 | PSMC2 | 683  | 762  | 6.49847479484 |
| NM_002803 | PSMC2 | 334  | 431  | 6.69111987278 |
| NM_002803 | PSMC2 | 845  | 1268 | 9.4724795863  |
| NM_002803 | PSMC2 | 147  | 331  | 7.15055149142 |
| NM_002803 | PSMC2 | 762  | 838  | 3.69111986523 |
| NM_002803 | PSMC2 | 432  | 620  | 7.01304796767 |
| NM_002803 | PSMC2 | 1272 | 1517 | 8.21468182884 |
| NM_002802 | PSMC1 | 45   | 105  | 4.4070992668  |
| NM_002802 | PSMC1 | 1038 | 1086 | 5.41111686697 |
| NM_002802 | PSMC1 | 825  | 896  | 5.41111686697 |
| NM_002802 | PSMC1 | 905  | 1026 | 6.73304496186 |
| NM_002802 | PSMC1 | 594  | 693  | 6.73304496186 |
| NM_002802 | PSMC1 | 226  | 515  | 7.65904438042 |
| NM_002802 | PSMC1 | 1123 | 1423 | 7.65904438042 |
| NM_002802 | PSMC1 | 109  | 180  | 4.4070992668  |
| NM_002809 | PSMD3 | 2069 | 2160 | 6.72199825809 |
| NM_002809 | PSMD3 | 526  | 642  | 7.94439067943 |
| NM_002809 | PSMD3 | 1158 | 1248 | 4.55207325665 |
| NM_002809 | PSMD3 | 1087 | 1148 | 4.55207325665 |
| NM_002809 | PSMD3 | 652  | 837  | 7.13703575737 |
| NM_002809 | PSMD3 | 839  | 1075 | 7.72199825809 |
| NM_002809 | PSMD3 | 1256 | 1487 | 7.87400135154 |
| NM_002809 | PSMD3 | 1581 | 1809 | 7.13703575737 |
| NM_002809 | PSMD3 | 355  | 513  | 5.87400135154 |
| NM_002808 | PSMD2 | 1703 | 1772 | 7.12453959906 |
| NM_002808 | PSMD2 | 2955 | 3018 | 5.90214717772 |
| NM_002808 | PSMD2 | 413  | 574  | 7.90214717772 |
| NM_002808 | PSMD2 | 2112 | 2156 | 5.31701092668 |
| NM_002808 | PSMD2 | 2847 | 2941 | 7.317184677   |
| NM_002808 | PSMD2 | 1290 | 1684 | 9.84074663306 |

|              |         |      |      |               |
|--------------|---------|------|------|---------------|
| NM_002808    | PSMD2   | 590  | 733  | 7.48710967844 |
| NM_002808    | PSMD2   | 227  | 410  | 7.317184677   |
| NM_002808    | PSMD2   | 1226 | 1286 | 6.63911277189 |
| NM_002808    | PSMD2   | 2337 | 2508 | 7.12453959906 |
| NM_002808    | PSMD2   | 2159 | 2329 | 7.90214717772 |
| NM_002808    | PSMD2   | 791  | 1209 | 9.07207217917 |
| NM_002808    | PSMD2   | 2513 | 2724 | 8.70950209978 |
| NM_002808    | PSMD2   | 1777 | 2112 | 8.70950209978 |
| NM_001751    | CARS    | 1536 | 1577 | 4.43267069039 |
| NM_001751    | CARS    | 208  | 254  | 6.01780021037 |
| NM_001751    | CARS    | 806  | 855  | 6.01763319111 |
| NM_001751    | CARS    | 340  | 405  | 6.01780021037 |
| NM_001751    | CARS    | 1958 | 2014 | 4.43267069039 |
| NM_001751    | CARS    | 1136 | 1194 | 5.34870523132 |
| NM_001751    | CARS    | 2318 | 2382 | 5.43283770965 |
| NM_145903    | HMGA1   | 1044 | 1131 | 8.16900290302 |
| NM_145903    | HMGA1   | 85   | 148  | 6.68357607585 |
| NM_145903    | HMGA1   | 838  | 921  | 7.36164798097 |
| NM_145903    | HMGA1   | 509  | 564  | 5.94661048146 |
| NM_145903    | HMGA1   | 1534 | 1580 | 6.94661048169 |
| NM_145903    | HMGA1   | 1736 | 1807 | 6.36164798097 |
| NM_145903    | HMGA1   | 1583 | 1634 | 5.36164124991 |
| NM_145903    | HMGA1   | 747  | 813  | 5.36164798074 |
| NM_145903    | HMGA1   | 1401 | 1532 | 8.94661048169 |
| NM_145903    | HMGA1   | 189  | 297  | 6.68357607585 |
| NM_145903    | HMGA1   | 1159 | 1311 | 6.68357607585 |
| NM_001042588 | SNUPN   | 149  | 216  | 6.14175139228 |
| NM_006134    | TMEM50B | 586  | 634  | 8.21084096401 |
| NM_006134    | TMEM50B | 654  | 739  | 8.29498017317 |
| NM_014550    | CARD10  | 3361 | 3418 | 5.53281662279 |
| NM_014550    | CARD10  | 1670 | 1737 | 5.53280989928 |
| NM_001933    | DLST    | 2602 | 2668 | 3.36511460285 |
| NM_001933    | DLST    | 1787 | 1846 | 5.36512132636 |
| NM_001933    | DLST    | 361  | 407  | 3.36512132636 |
| NM_001933    | DLST    | 2113 | 2157 | 3.28098212452 |
| NM_001933    | DLST    | 416  | 481  | 5.36512133391 |
| NM_001933    | DLST    | 705  | 759  | 3.3651213339  |
| NM_001933    | DLST    | 1304 | 1372 | 5.36512133391 |
| NM_001933    | DLST    | 1144 | 1228 | 4.36512133391 |
| NM_001933    | DLST    | 1861 | 1938 | 5.36512133391 |
| NM_001933    | DLST    | 816  | 876  | 3.36512132636 |
| NM_001933    | DLST    | 1056 | 1128 | 5.36512133391 |
| NM_147156    | SGMS1   | 1597 | 1650 | 7.22412480868 |
| NM_147156    | SGMS1   | 1514 | 1562 | 5.64300615781 |
| NM_147156    | SGMS1   | 1871 | 1936 | 5.64317990813 |
| NM_147156    | SGMS1   | 755  | 824  | 6.63916230796 |
| NM_147156    | SGMS1   | 2533 | 2611 | 7.14400319947 |
| NM_147156    | SGMS1   | 2314 | 2391 | 7.96510800302 |
| NM_005466    | MED6    | 766  | 841  | 6.48223646169 |
| NM_005466    | MED6    | 1248 | 1346 | 7.48223646901 |

|           |         |      |      |               |
|-----------|---------|------|------|---------------|
| NM_147152 | ITSN2   | 890  | 951  | 7.18716733242 |
| NM_147152 | ITSN2   | 462  | 511  | 7.18314973226 |
| NM_147152 | ITSN2   | 1071 | 1134 | 5.60203108139 |
| NM_147152 | ITSN2   | 2873 | 2922 | 7.18314973226 |
| NM_147152 | ITSN2   | 3222 | 3277 | 6.51806562232 |
| NM_147152 | ITSN2   | 2579 | 2681 | 6.59818723153 |
| NM_178454 | DRAM2   | 1322 | 1424 | 5.84966978758 |
| NM_178454 | DRAM2   | 788  | 890  | 7.07607980909 |
| NM_178454 | DRAM2   | 1013 | 1064 | 5.26872487948 |
| NM_178454 | DRAM2   | 904  | 944  | 4.26871815598 |
| NM_178454 | DRAM2   | 185  | 257  | 5.26872488703 |
| NM_178454 | DRAM2   | 1122 | 1200 | 6.26872488703 |
| NM_178454 | DRAM2   | 289  | 375  | 6.26872488703 |
| NM_178454 | DRAM2   | 698  | 768  | 6.85368738775 |
| NM_178454 | DRAM2   | 469  | 592  | 7.26872488703 |
| NM_201999 | ELF2    | 1693 | 1751 | 4.85769627785 |
| NM_178450 | MARCH3  | 459  | 495  | 10.5882155623 |
| NM_014089 | NUPL1   | 4049 | 4103 | 6.17210788202 |
| NM_014089 | NUPL1   | 507  | 552  | 6.17211461285 |
| NM_014089 | NUPL1   | 559  | 605  | 5.17210788202 |
| NM_014089 | NUPL1   | 786  | 860  | 7.49404270796 |
| NM_014089 | NUPL1   | 2145 | 2294 | 7.97946953513 |
| NM_014089 | NUPL1   | 1828 | 1904 | 6.17194086276 |
| NM_003601 | SMARCA5 | 3103 | 3156 | 3.61850730308 |
| NM_003601 | SMARCA5 | 988  | 1052 | 3.61850753899 |
| NM_003601 | SMARCA5 | 3157 | 3196 | 2.61850080794 |
| NM_003601 | SMARCA5 | 2360 | 2399 | 2.61833378868 |
| NM_003601 | SMARCA5 | 4042 | 4084 | 4.11933083033 |
| NM_003601 | SMARCA5 | 1841 | 1875 | 2.61448993882 |
| NM_003601 | SMARCA5 | 1905 | 1954 | 2.61448993882 |
| NM_003601 | SMARCA5 | 3867 | 3927 | 4.94043539796 |
| NM_003601 | SMARCA5 | 2158 | 2340 | 6.31894725714 |
| NM_003601 | SMARCA5 | 1731 | 1839 | 5.20347003972 |
| NM_003601 | SMARCA5 | 1980 | 2025 | 4.61833378868 |
| NM_003601 | SMARCA5 | 851  | 922  | 4.20347003217 |
| NM_003601 | SMARCA5 | 1611 | 1672 | 3.61448993882 |
| NM_003601 | SMARCA5 | 2030 | 2108 | 4.2034698038  |
| NM_003601 | SMARCA5 | 1360 | 1569 | 6.07793915763 |
| NM_003601 | SMARCA5 | 2413 | 2659 | 4.20347003972 |
| NM_003601 | SMARCA5 | 1183 | 1282 | 3.61850753899 |
| NM_003601 | SMARCA5 | 3203 | 3428 | 6.07793915763 |
| NM_003601 | SMARCA5 | 723  | 841  | 4.61850753899 |
| NM_003609 | HIRIP3  | 245  | 270  | 6.98605555317 |
| NM_003609 | HIRIP3  | 1966 | 2102 | 6.98588180285 |
| NM_018410 | HJURP   | 223  | 319  | 8.83001542352 |
| NM_018410 | HJURP   | 1637 | 1690 | 7.24104205368 |
| NM_018410 | HJURP   | 2511 | 2553 | 8.16092044447 |
| NM_018410 | HJURP   | 541  | 603  | 8.2450596463  |
| NM_018410 | HJURP   | 2313 | 2426 | 10.4149846553 |
| NM_018410 | HJURP   | 2580 | 2646 | 7.24505965385 |

|              |         |      |      |               |
|--------------|---------|------|------|---------------|
| NM_013323    | SNX11   | 677  | 739  | 9.9585763923  |
| NM_013323    | SNX11   | 874  | 952  | 8.95456552318 |
| NM_013323    | SNX11   | 566  | 620  | 8.87444391397 |
| NM_180991    | SLC04C1 | 2466 | 2536 | 11.0168066208 |
| NM_180991    | SLC04C1 | 491  | 573  | 11.601775845  |
| NM_180991    | SLC04C1 | 2385 | 2447 | 11.6017758525 |
| NM_180991    | SLC04C1 | 932  | 1066 | 13.0168133518 |
| NM_180991    | SLC04C1 | 2051 | 2096 | 12.0168133443 |
| NM_180991    | SLC04C1 | 1391 | 1436 | 11.6017758525 |
| NM_180991    | SLC04C1 | 623  | 737  | 12.8241682739 |
| NM_180991    | SLC04C1 | 1066 | 1152 | 10.0168133518 |
| NM_180991    | SLC04C1 | 351  | 410  | 10.0168133518 |
| NM_180991    | SLC04C1 | 2179 | 2276 | 12.8241682739 |
| NM_180991    | SLC04C1 | 737  | 863  | 12.3387414467 |
| NM_180991    | SLC04C1 | 1710 | 1849 | 13.71725307   |
| NM_180991    | SLC04C1 | 257  | 341  | 11.0168133516 |
| NM_180991    | SLC04C1 | 1173 | 1317 | 13.6017758525 |
| NM_180991    | SLC04C1 | 1937 | 2035 | 12.6017758525 |
| NM_180991    | SLC04C1 | 1455 | 1695 | 13.4762449704 |
| NM_001100389 | TMEM192 | 1028 | 1101 | 6.1635572119  |
| NM_001100389 | TMEM192 | 294  | 320  | 5.1635572119  |
| NM_001100389 | TMEM192 | 736  | 804  | 6.24769642128 |
| NM_001100389 | TMEM192 | 1822 | 1878 | 5.24367882111 |
| NM_001100389 | TMEM192 | 154  | 280  | 7.832658922   |
| NM_001100389 | TMEM192 | 1123 | 1169 | 5.24367882111 |
| NM_001100389 | TMEM192 | 1626 | 1683 | 5.24752267097 |
| NM_001100389 | TMEM192 | 486  | 662  | 7.24769642128 |
| NM_001100389 | TMEM192 | 2832 | 2905 | 5.24769642128 |
| NM_014338    | PISD    | 725  | 818  | 10.4059839142 |
| NM_014338    | PISD    | 878  | 952  | 9.40598391423 |
| NM_014338    | PISD    | 1643 | 1692 | 7.40196631406 |
| NM_014338    | PISD    | 124  | 180  | 7.40598367831 |
| NM_014338    | PISD    | 525  | 576  | 8.40597718318 |
| NM_014338    | PISD    | 2588 | 2649 | 8.40598390668 |
| NM_014338    | PISD    | 238  | 286  | 7.40598391423 |
| NM_014338    | PISD    | 1802 | 1980 | 10.8654155329 |
| NM_014338    | PISD    | 2026 | 2078 | 7.40196631406 |
| NM_014338    | PISD    | 1312 | 1449 | 9.72791200912 |
| NM_014338    | PISD    | 2104 | 2202 | 8.99094641495 |
| NM_014338    | PISD    | 988  | 1250 | 11.1064236324 |
| NM_014339    | IL17RA  | 2820 | 2867 | 12.0756642265 |
| NM_014339    | IL17RA  | 39   | 100  | 9.48668412558 |
| NM_014339    | IL17RA  | 2281 | 2318 | 9.48668412558 |
| NM_014339    | IL17RA  | 1000 | 1099 | 12.4907017258 |
| NM_014339    | IL17RA  | 455  | 545  | 11.4907017258 |
| NM_014339    | IL17RA  | 316  | 382  | 9.49070172575 |
| NM_014339    | IL17RA  | 1569 | 1634 | 9.49070172575 |
| NM_014339    | IL17RA  | 3491 | 3570 | 9.49070172553 |
| NM_014339    | IL17RA  | 715  | 879  | 11.4907017258 |
| NM_014339    | IL17RA  | 1691 | 1757 | 9.49052797543 |

|           |          |      |      |                    |
|-----------|----------|------|------|--------------------|
| NM_014886 | NSA2     | 1161 | 1257 | 4.19987427176      |
| NM_014886 | NSA2     | 386  | 521  | 4.61491177104      |
| NM_014886 | NSA2     | 743  | 862  | 2.61491177104      |
| NM_014335 | EID1     | 1535 | 1575 | 8.91565841437      |
| NM_014335 | EID1     | 947  | 991  | 9.91565841437      |
| NM_014335 | EID1     | 1614 | 1664 | 10.9116475452      |
| NM_014335 | EID1     | 583  | 670  | 10.5006276461      |
| NM_014335 | EID1     | 379  | 428  | 10.496610046       |
| NM_014335 | EID1     | 771  | 840  | 8.9154913951       |
| NM_014335 | EID1     | 1461 | 1524 | 9.9156649095       |
| NM_014335 | EID1     | 55   | 166  | 10.9156651454      |
| NM_014337 | PPIL2    | 517  | 566  | 6.81496310306      |
| NM_014337 | PPIL2    | 2589 | 2676 | 5.81478935274      |
| NM_014337 | PPIL2    | 3124 | 3185 | 6.81496309551      |
| NM_014337 | PPIL2    | 155  | 245  | 6.81496309551      |
| NM_014337 | PPIL2    | 1059 | 1127 | 5.81094550289      |
| NM_014337 | PPIL2    | 2906 | 2970 | 8.13689119795      |
| NM_014337 | PPIL2    | 3199 | 3270 | 5.81496310306      |
| NM_014337 | PPIL2    | 2775 | 2822 | 5.73082389368      |
| NM_014337 | PPIL2    | 2430 | 2548 | 6.81496286714      |
| NM_014337 | PPIL2    | 970  | 1037 | 5.81094550289      |
| NM_014337 | PPIL2    | 246  | 339  | 7.39992560378      |
| NM_014337 | PPIL2    | 1174 | 1341 | 8.13689119795      |
| NM_014337 | PPIL2    | 651  | 748  | 5.81094550289      |
| NM_014330 | PPP1R15A |      | 1339 | 1391 5.88975354387 |
| NM_014331 | SLC7A11  | 1189 | 1219 | 7.42732447832      |
| NM_014331 | SLC7A11  | 7535 | 7643 | 7.4233136092       |
| NM_014331 | SLC7A11  | 9028 | 9083 | 8.42732447832      |
| NM_014331 | SLC7A11  | 1763 | 1834 | 9.01228697904      |
| NM_014331 | SLC7A11  | 1238 | 1299 | 8.42733120938      |
| NM_014331 | SLC7A11  | 1600 | 1668 | 9.74925930426      |
| NM_014331 | SLC7A11  | 687  | 783  | 9.74925930426      |
| NM_014331 | SLC7A11  | 1367 | 1497 | 9.74925930426      |
| NM_014331 | SLC7A11  | 8755 | 8827 | 8.42733097346      |
| NM_014331 | SLC7A11  | 8398 | 8475 | 7.34319199999      |
| NM_014880 | CD302    | 206  | 293  | 7.16862832292      |
| NM_005607 | PTK2     | 2859 | 2913 | 5.89466591492      |
| NM_005607 | PTK2     | 3891 | 3932 | 4.97478752413      |
| NM_005607 | PTK2     | 773  | 862  | 6.56376762481      |
| NM_005607 | PTK2     | 2574 | 2637 | 6.56376089398      |
| NM_005607 | PTK2     | 3348 | 3417 | 6.56359387471      |
| NM_005607 | PTK2     | 2100 | 2214 | 6.56376762503      |
| NM_005607 | PTK2     | 1379 | 1426 | 4.97478752413      |
| NM_005607 | PTK2     | 1488 | 1594 | 4.97863137399      |
| NM_005603 | ATP8B1   | 3928 | 3975 | 10.4308787969      |
| NM_005603 | ATP8B1   | 2994 | 3094 | 11.4308788044      |
| NM_005603 | ATP8B1   | 5584 | 5639 | 8.84591630367      |
| NM_005603 | ATP8B1   | 3114 | 3212 | 9.84591630367      |
| NM_005603 | ATP8B1   | 732  | 779  | 9.7617770943       |
| NM_005603 | ATP8B1   | 3511 | 3643 | 11.6532712257      |

|           |         |      |      |               |
|-----------|---------|------|------|---------------|
| NM_005603 | ATP8B1  | 2272 | 2381 | 10.4308788044 |
| NM_005603 | ATP8B1  | 3392 | 3505 | 10.8459163035 |
| NM_032237 | SGK196  | 1483 | 1557 | 10.8175930226 |
| NM_032237 | SGK196  | 325  | 395  | 12.1395211175 |
| NM_032237 | SGK196  | 661  | 748  | 10.8175930224 |
| NM_032237 | SGK196  | 178  | 233  | 9.8175927867  |
| NM_032237 | SGK196  | 861  | 910  | 9.81758629157 |
| NM_032237 | SGK196  | 41   | 141  | 12.1395211175 |
| NM_032237 | SGK196  | 541  | 655  | 12.1395211175 |
| NM_032237 | SGK196  | 401  | 495  | 10.8175862916 |
| NM_032237 | SGK196  | 1004 | 1089 | 10.8174192723 |
| NM_032236 | USP48   | 795  | 832  | 5.39112212237 |
| NM_032236 | USP48   | 3127 | 3206 | 4.38727827252 |
| NM_032236 | USP48   | 2848 | 2885 | 5.39128914163 |
| NM_032587 | CARD6   | 3367 | 3418 | 10.7978013941 |
| NM_152729 | NT5DC1  | 113  | 171  | 4.49936158534 |
| NM_152729 | NT5DC1  | 552  | 591  | 5.41923997613 |
| NM_152729 | NT5DC1  | 465  | 516  | 6.00420247685 |
| NM_032582 | USP32   | 3068 | 3124 | 5.47097846609 |
| NM_032582 | USP32   | 3403 | 3462 | 5.47098519692 |
| NM_032582 | USP32   | 4944 | 4987 | 6.38684598776 |
| NM_032582 | USP32   | 341  | 395  | 5.47098518959 |
| NM_032582 | USP32   | 4749 | 4820 | 5.46696759697 |
| NM_032582 | USP32   | 2648 | 2685 | 6.38684598776 |
| NM_032582 | USP32   | 4576 | 4616 | 6.38684598776 |
| NM_032582 | USP32   | 3235 | 3292 | 7.47098518959 |
| NM_032581 | FAM126A | 849  | 909  | 6.69388522556 |
| NM_032581 | FAM126A | 4186 | 4239 | 6.60974601639 |
| NM_032581 | FAM126A | 1307 | 1441 | 6.69388522556 |
| NM_032581 | FAM126A | 636  | 702  | 7.108915994   |
| NM_023075 | MPPE1   | 1606 | 1657 | 8.87976892379 |
| NM_023075 | MPPE1   | 759  | 800  | 8.21084096401 |
| NM_023075 | MPPE1   | 801  | 833  | 7.21084096401 |
| NM_023075 | MPPE1   | 850  | 912  | 9.61690826828 |
| NM_023075 | MPPE1   | 572  | 629  | 8.29498016584 |
| NM_023075 | MPPE1   | 2133 | 2198 | 8.29480642307 |
| NM_023075 | MPPE1   | 1247 | 1474 | 10.754411792  |
| NM_023075 | MPPE1   | 2021 | 2101 | 7.29498017339 |
| NM_004722 | AP4M1   | 412  | 505  | 12.3411217472 |
| NM_023071 | SPATS2  | 2635 | 2707 | 6.89887886215 |
| NM_023071 | SPATS2  | 2009 | 2083 | 6.31391635388 |
| NM_023071 | SPATS2  | 1817 | 1910 | 5.31391636143 |
| NM_023071 | SPATS2  | 1723 | 1783 | 5.30989876125 |
| NM_023071 | SPATS2  | 1402 | 1452 | 6.22977715204 |
| NM_023071 | SPATS2  | 2146 | 2219 | 6.89486126197 |
| NM_023073 | C5orf42 | 8245 | 8282 | 8.44170782034 |
| NM_023079 | UBE2Z   | 1270 | 1313 | 3.77001543203 |
| NM_023079 | UBE2Z   | 679  | 742  | 5.35498465626 |
| NM_023079 | UBE2Z   | 476  | 526  | 3.6858829537  |
| NM_023079 | UBE2Z   | 2843 | 2904 | 5.35481091349 |



|              |          |      |      |               |
|--------------|----------|------|------|---------------|
| NM_023079    | UBE2Z    | 750  | 842  | 3.77002216308 |
| NM_023079    | UBE2Z    | 2121 | 2193 | 4.77002216308 |
| NM_023079    | UBE2Z    | 1040 | 1188 | 5.77002216308 |
| NM_023079    | UBE2Z    | 2312 | 2426 | 6.35498466381 |
| NM_023079    | UBE2Z    | 572  | 647  | 4.77002216308 |
| NM_023079    | UBE2Z    | 1874 | 1989 | 4.77002216308 |
| NM_004720    | LPAR2    | 990  | 1045 | 12.4066570866 |
| NM_001017974 | P4HA2    | 1003 | 1047 | 3.98713649846 |
| NM_001017974 | P4HA2    | 1108 | 1175 | 6.79449142807 |
| NM_001017974 | P4HA2    | 352  | 409  | 5.98713650601 |
| NM_001017974 | P4HA2    | 1968 | 2008 | 3.9869627557  |
| NM_001017974 | P4HA2    | 284  | 343  | 4.98712977496 |
| NM_001017974 | P4HA2    | 1615 | 1856 | 8.37945392879 |
| NM_001017974 | P4HA2    | 1240 | 1413 | 7.57209900673 |
| NM_001017974 | P4HA2    | 75   | 233  | 8.3090646009  |
| NM_001017974 | P4HA2    | 578  | 669  | 6.79449142807 |
| NM_001017974 | P4HA2    | 424  | 565  | 6.98713650601 |
| NM_001017974 | P4HA2    | 1433 | 1611 | 7.44656812465 |
| NM_001017974 | P4HA2    | 702  | 978  | 8.37945392879 |
| NM_004724    | ZW10     | 1925 | 1961 | 6.50035811501 |
| NM_004724    | ZW10     | 1803 | 1853 | 8.08933148485 |
| NM_004724    | ZW10     | 2160 | 2214 | 8.08916446558 |
| NM_004724    | ZW10     | 1522 | 1596 | 8.50420196486 |
| NM_152892    | LRWD1    | 289  | 345  | 10.0246720779 |
| NM_152892    | LRWD1    | 1701 | 1741 | 9.43569221291 |
| NM_152892    | LRWD1    | 1354 | 1404 | 8.43953606277 |
| NM_152892    | LRWD1    | 183  | 268  | 10.0206547136 |
| NM_152892    | LRWD1    | 1409 | 1504 | 8.43569221291 |
| NM_152892    | LRWD1    | 1581 | 1671 | 9.43970981309 |
| NM_152896    | UHRF2    | 3113 | 3174 | 5.29787444211 |
| NM_152896    | UHRF2    | 1790 | 1845 | 6.29787444211 |
| NM_152896    | UHRF2    | 676  | 730  | 5.29403059226 |
| NM_152896    | UHRF2    | 3486 | 3550 | 5.29787444211 |
| NM_152896    | UHRF2    | 516  | 615  | 5.29804819243 |
| NM_152896    | UHRF2    | 1008 | 1102 | 5.29804146138 |
| NM_152546    | SRFBP1   | 673  | 788  | 8.11975571375 |
| NM_152546    | SRFBP1   | 191  | 250  | 6.11958197098 |
| NM_152544    | METTTL19 | 2341 | 2409 | 8.05714193799 |
| NM_152540    | SCFD2    | 536  | 589  | 8.71998321043 |
| NM_152540    | SCFD2    | 172  | 238  | 7.13903830233 |
| NM_152540    | SCFD2    | 1520 | 1561 | 8.13903807396 |
| NM_152540    | SCFD2    | 1061 | 1130 | 8.72400057468 |
| NM_152540    | SCFD2    | 1728 | 1775 | 7.13502070971 |
| NM_152540    | SCFD2    | 127  | 167  | 8.13502070971 |
| NM_152540    | SCFD2    | 617  | 751  | 8.7240008106  |
| NM_015680    | CNPPD1   | 1012 | 1044 | 6.87151797242 |
| NM_015680    | CNPPD1   | 427  | 465  | 7.46032432299 |
| NM_015680    | CNPPD1   | 257  | 309  | 6.87553557259 |
| NM_015680    | CNPPD1   | 855  | 900  | 5.87552884153 |
| NM_015680    | CNPPD1   | 2023 | 2054 | 6.87553557258 |

|              |              |      |      |                    |
|--------------|--------------|------|------|--------------------|
| NM_015680    | CNPPD1       | 1969 | 2022 | 7.46049807331      |
| NM_015680    | CNPPD1       | 1870 | 1936 | 6.87553557259      |
| NM_015680    | CNPPD1       | 368  | 426  | 5.87553533667      |
| NM_015680    | CNPPD1       | 905  | 1008 | 8.19746366748      |
| NM_015680    | CNPPD1       | 476  | 559  | 8.46049807331      |
| NM_015680    | CNPPD1       | 1324 | 1442 | 8.19746366748      |
| NM_015680    | CNPPD1       | 1145 | 1223 | 5.87553556504      |
| NM_015680    | CNPPD1       | 650  | 768  | 8.19746366748      |
| NM_001127716 | ETFA         | 123  | 184  | 5.13998972107      |
| NM_001127716 | ETFA         | 996  | 1043 | 3.05585051169      |
| NM_001127716 | ETFA         | 1076 | 1108 | 4.1359721209       |
| NM_001127716 | ETFA         | 664  | 928  | 6.94734464313      |
| NM_001127716 | ETFA         | 188  | 300  | 5.46191781596      |
| NM_001127716 | ETFA         | 512  | 661  | 5.94734464313      |
| NM_001127716 | ETFA         | 309  | 477  | 6.7249522218       |
| NM_001144062 | COPB1        | 1986 | 2064 | 7.69294571089      |
| NM_001144062 | COPB1        | 1107 | 1230 | 7.83044923464      |
| NM_001144062 | COPB1        | 559  | 627  | 6.371017616        |
| NM_001144062 | COPB1        | 1321 | 1397 | 6.95598011672      |
| NM_001144062 | COPB1        | 1807 | 1908 | 7.371017616        |
| NM_001144062 | COPB1        | 3208 | 3256 | 6.69294571089      |
| NM_001144062 | COPB1        | 2072 | 2117 | 5.9559798808       |
| NM_001144062 | COPB1        | 632  | 745  | 7.69294571089      |
| NM_001144062 | COPB1        | 2118 | 2267 | 6.69294571089      |
| NM_001144062 | COPB1        | 2389 | 2529 | 8.371017616        |
| NM_001144062 | COPB1        | 3076 | 3169 | 7.83044923464      |
| NM_001144062 | COPB1        | 763  | 940  | 8.54094261744      |
| NM_001144062 | COPB1        | 1241 | 1320 | 6.371017616        |
| NM_001144062 | COPB1        | 1397 | 1540 | 7.371017616        |
| NM_001144062 | COPB1        | 125  | 399  | 8.61894512944      |
| NM_001144062 | COPB1        | 2926 | 2995 | 5.95598011672      |
| NM_001144062 | COPB1        | 2545 | 2765 | 8.45848045725      |
| NM_001144062 | COPB1        | 956  | 1107 | 8.27790821161      |
| NM_001144062 | COPB1        | 2793 | 2881 | 5.95598011672      |
| NM_001144062 | COPB1        | 1544 | 1759 | 7.54094261744      |
| NM_003099    | SNX1         | 1980 | 2020 | 6.28904048658      |
| NM_003099    | SNX1         | 1567 | 1622 | 5.28887346732      |
| NM_003099    | SNX1         | 1433 | 1509 | 4.28904048658      |
| NM_212543    | B4GALT4      | 1048 | 1099 | 7.56003373931      |
| NM_212543    | B4GALT4      | 656  | 752  | 5.55985999654      |
| NM_212543    | B4GALT4      | 1654 | 1718 | 7.14482249726      |
| NM_212543    | B4GALT4      | 1274 | 1323 | 7.14097864741      |
| NM_212543    | B4GALT4      | 1406 | 1610 | 8.56003374686      |
| NM_001199119 | TRIM39-RPP21 |      | 1223 | 1277 9.48794747177 |
| NM_016013    | NDUFAF1      | 1283 | 1321 | 8.10287652891      |
| NM_001098800 | MAGED4       | 2296 | 2343 | 4.48327402768      |
| NM_001098800 | MAGED4       | 2048 | 2122 | 6.06824325946      |
| NM_001098800 | MAGED4       | 1394 | 1474 | 5.48328075874      |
| NM_001098800 | MAGED4       | 1025 | 1086 | 5.48327402768      |
| NM_001098800 | MAGED4       | 1624 | 1656 | 4.48310700842      |

|              |          |      |      |               |               |
|--------------|----------|------|------|---------------|---------------|
| NM_001098800 | MAGED4   | 2369 | 2423 | 4.48328075874 |               |
| NM_001098800 | MAGED4   | 2172 | 2211 | 4.47926315856 |               |
| NM_001098800 | MAGED4   | 226  | 299  | 6.80520885362 |               |
| NM_001098800 | MAGED4   | 1486 | 1622 | 7.06824325946 |               |
| NM_001098800 | MAGED4   | 2431 | 2550 | 6.48328075874 |               |
| NM_001098800 | MAGED4   | 1929 | 2035 | 6.48328075874 |               |
| NM_001098800 | MAGED4   | 1762 | 1832 | 4.48328075119 |               |
| NM_016016    | SLC25A39 |      | 128  | 182           | 6.80972843934 |
| NM_016016    | SLC25A39 |      | 1430 | 1566          | 8.39469117598 |
| NM_016016    | SLC25A39 |      | 1096 | 1216          | 8.0321210966  |
| NM_016016    | SLC25A39 |      | 521  | 752           | 9.13165677015 |
| NM_016016    | SLC25A39 |      | 797  | 1024          | 9.22476617454 |
| NM_016016    | SLC25A39 |      | 194  | 439           | 8.39469117598 |
| NM_001098808 | C9orf129 |      | 663  | 702           | 5.51979595877 |
| NM_001098808 | C9orf129 |      | 387  | 440           | 6.43967434956 |
| NM_001098808 | C9orf129 |      | 495  | 568           | 5.52381355895 |
| NM_015062    | PPRC1    | 2777 | 2822 | 6.61438030921 |               |
| NM_015062    | PPRC1    | 3323 | 3364 | 7.61438030921 |               |
| NM_015062    | PPRC1    | 1785 | 1826 | 6.61822415906 |               |
| NM_015062    | PPRC1    | 4223 | 4265 | 6.61822415906 |               |
| NM_015062    | PPRC1    | 571  | 616  | 6.61839790183 |               |
| NM_015062    | PPRC1    | 4515 | 4595 | 8.94032600427 |               |
| NM_015062    | PPRC1    | 3043 | 3084 | 7.61839117833 |               |
| NM_015062    | PPRC1    | 2474 | 2603 | 8.61839790938 |               |
| NM_015062    | PPRC1    | 366  | 526  | 9.2033604101  |               |
| NM_015062    | PPRC1    | 4942 | 5047 | 8.94032600427 |               |
| NM_015062    | PPRC1    | 4341 | 4513 | 9.42575283144 |               |
| NM_015061    | KDM4C    | 4328 | 4433 | 7.88120352633 |               |
| NM_015061    | KDM4C    | 2783 | 2819 | 6.21210181623 |               |
| NM_015060    | AVL9     | 2173 | 2252 | 7.63029334182 |               |
| NM_015060    | AVL9     | 473  | 560  | 7.95222143671 |               |
| NM_015060    | AVL9     | 830  | 896  | 7.6302931059  |               |
| NM_015060    | AVL9     | 1114 | 1152 | 7.21123824237 |               |
| NM_015060    | AVL9     | 1416 | 1538 | 6.63029334182 |               |
| NM_015060    | AVL9     | 1578 | 1671 | 7.6302933416  |               |
| NM_001130082 | PLXNB1   | 3146 | 3211 | 7.96467568987 |               |
| NM_001130082 | PLXNB1   | 1555 | 1596 | 6.29557397976 |               |
| NM_001130082 | PLXNB1   | 3525 | 3576 | 5.37953943883 |               |
| NM_001130082 | PLXNB1   | 6817 | 6859 | 5.29557397976 |               |
| NM_001130082 | PLXNB1   | 831  | 868  | 6.37970645809 |               |
| NM_001130082 | PLXNB1   | 5867 | 5928 | 5.37569558897 |               |
| NM_001130082 | PLXNB1   | 5559 | 5611 | 7.37569558897 |               |
| NM_001130082 | PLXNB1   | 4658 | 4796 | 6.37971318915 |               |
| NM_001130082 | PLXNB1   | 2857 | 2939 | 5.37971318915 |               |
| NM_001130082 | PLXNB1   | 2385 | 2464 | 5.37953943883 |               |
| NM_001130082 | PLXNB1   | 1474 | 1555 | 5.37971318892 |               |
| NM_001130082 | PLXNB1   | 5102 | 5277 | 6.96467568987 |               |
| NM_001130081 | PLD1     | 3633 | 3699 | 5.25065532235 |               |
| NM_001130081 | PLD1     | 2806 | 2848 | 6.25065532235 |               |
| NM_001130081 | PLD1     | 5270 | 5338 | 6.33462078142 |               |

|              |          |      |      |                   |
|--------------|----------|------|------|-------------------|
| NM_001130081 | PLD1     | 154  | 244  | 6.91975703223     |
| NM_001130081 | PLD1     | 3788 | 3886 | 5.33077693156     |
| NM_001130081 | PLD1     | 1905 | 2036 | 6.33479429582     |
| NM_001130089 | KARS     | 1080 | 1248 | 7.23580164024     |
| NM_001130089 | KARS     | 1764 | 1856 | 3.77619627128     |
| NM_001130089 | KARS     | 1857 | 1934 | 5.36133252232     |
| NM_001130089 | KARS     | 1952 | 2122 | 6.36133252232     |
| NM_001130089 | KARS     | 1435 | 1607 | 6.58372494366     |
| NM_001130089 | KARS     | 486  | 595  | 6.7763700216      |
| NM_001130089 | KARS     | 1657 | 1746 | 6.09829811649     |
| NM_001130089 | KARS     | 733  | 981  | 7.68326061721     |
| NM_001130089 | KARS     | 1248 | 1315 | 5.36133252232     |
| NM_173810    | TTC9C    | 1032 | 1087 | 5.46115696035     |
| NM_173810    | TTC9C    | 719  | 755  | 6.46115696035     |
| NM_173810    | TTC9C    | 495  | 596  | 5.46517455297     |
| NM_001018109 | PIR      | 549  | 616  | 8.06143153094     |
| NM_001018109 | PIR      | 1282 | 1334 | 7.47646902267     |
| NM_001018109 | PIR      | 630  | 699  | 6.4764687943      |
| NM_001018109 | PIR      | 404  | 479  | 6.47646229917     |
| NM_012482    | ZNF281   | 3726 | 3770 | 6.25954644357     |
| NM_012482    | ZNF281   | 556  | 598  | 7.26339029342     |
| NM_012482    | ZNF281   | 911  | 957  | 8.26356404352     |
| NM_012482    | ZNF281   | 707  | 770  | 6.25954644357     |
| NM_012482    | ZNF281   | 1273 | 1317 | 7.17942483436     |
| NM_012482    | ZNF281   | 4170 | 4257 | 6.26356380782     |
| NM_001071775 | MZT1     | 265  | 401  | 6.75886555226     |
| NM_005685    | GTF2IRD1 |      | 480  | 560 9.62671165825 |
| NM_005685    | GTF2IRD1 |      | 3174 | 3334 8.6267116658 |
| NM_178176    | MOGAT3   | 335  | 440  | 8.61015722606     |
| NM_178176    | MOGAT3   | 874  | 915  | 7.60613962611     |
| NM_178176    | MOGAT3   | 294  | 334  | 7.61015049523     |
| NM_030579    | CYB5B    | 2263 | 2337 | 5.38680251864     |
| NM_030579    | CYB5B    | 187  | 245  | 4.80184001769     |
| NM_030579    | CYB5B    | 256  | 366  | 5.80184001792     |
| NM_030579    | CYB5B    | 730  | 787  | 3.79782241774     |
| NM_030579    | CYB5B    | 958  | 1039 | 4.80184001792     |
| NM_030579    | CYB5B    | 463  | 544  | 5.80184001792     |
| NM_030579    | CYB5B    | 1828 | 1944 | 4.80184001792     |
| NM_030579    | CYB5B    | 1705 | 1790 | 4.80184001769     |
| NM_030579    | CYB5B    | 811  | 885  | 5.38680251109     |
| NM_030579    | CYB5B    | 1955 | 2045 | 3.80184001792     |
| NM_030579    | CYB5B    | 653  | 727  | 3.80183328686     |
| NM_005194    | CEBPB    | 1581 | 1629 | 6.84578381241     |
| NM_005194    | CEBPB    | 1814 | 1857 | 5.17668210253     |
| NM_030571    | NDFIP1   | 1800 | 1852 | 4.52071061705     |
| NM_030571    | NDFIP1   | 1062 | 1123 | 4.51669301688     |
| NM_030571    | NDFIP1   | 839  | 872  | 3.43657140767     |
| NM_030571    | NDFIP1   | 884  | 926  | 5.52053686673     |
| NM_030571    | NDFIP1   | 369  | 396  | 3.51669301688     |
| NM_030571    | NDFIP1   | 646  | 694  | 4.51669301688     |

|           |        |      |      |               |
|-----------|--------|------|------|---------------|
| NM_030571 | NDFIP1 | 436  | 640  | 6.98014223569 |
| NM_030571 | NDFIP1 | 246  | 324  | 4.52071061705 |
| NM_030571 | NDFIP1 | 1480 | 1547 | 5.84246496162 |
| NM_030571 | NDFIP1 | 702  | 824  | 6.98014223569 |
| NM_030571 | NDFIP1 | 1691 | 1794 | 3.52071061705 |
| NM_152924 | ABHD2  | 645  | 758  | 9.31960926438 |
| NM_152924 | ABHD2  | 7956 | 8006 | 8.09721011199 |
| NM_152924 | ABHD2  | 6604 | 6686 | 6.50823674215 |
| NM_152924 | ABHD2  | 2723 | 2778 | 8.09704309272 |
| NM_152924 | ABHD2  | 8427 | 8475 | 8.83418242966 |
| NM_152924 | ABHD2  | 3495 | 3576 | 7.512080592   |
| NM_152924 | ABHD2  | 1867 | 1917 | 6.51225434232 |
| NM_152924 | ABHD2  | 945  | 1024 | 8.51225434232 |
| NM_152924 | ABHD2  | 6430 | 6500 | 7.51224761127 |
| NM_152924 | ABHD2  | 810  | 938  | 9.68217934376 |
| NM_152924 | ABHD2  | 5088 | 5128 | 8.09721011199 |
| NM_152924 | ABHD2  | 2882 | 2956 | 8.8341824372  |
| NM_152924 | ABHD2  | 6991 | 7036 | 8.09319924287 |
| NM_152924 | ABHD2  | 1735 | 1774 | 6.42811513294 |
| NM_152924 | ABHD2  | 1377 | 1425 | 6.5122543421  |
| NM_152924 | ABHD2  | 5250 | 5284 | 6.50823674215 |
| NM_152924 | ABHD2  | 7464 | 7543 | 6.50823674215 |
| NM_152924 | ABHD2  | 3153 | 3193 | 7.42811513294 |
| NM_152924 | ABHD2  | 6023 | 6093 | 8.51225434232 |
| NM_152924 | ABHD2  | 3588 | 3664 | 7.50823674215 |
| NM_152924 | ABHD2  | 5576 | 5672 | 9.31960926438 |
| NM_152924 | ABHD2  | 346  | 634  | 10.3196092644 |
| NM_152924 | ABHD2  | 8259 | 8413 | 9.97168596096 |
| NM_152924 | ABHD2  | 1448 | 1584 | 9.68217934376 |
| NM_152924 | ABHD2  | 1598 | 1719 | 9.83418243721 |
| NM_152924 | ABHD2  | 7882 | 7946 | 8.09721684304 |
| NM_152924 | ABHD2  | 5877 | 5951 | 8.09721684304 |
| NM_152924 | ABHD2  | 5459 | 5552 | 8.09721684304 |
| NM_152924 | ABHD2  | 1257 | 1311 | 8.42811513294 |
| NM_152924 | ABHD2  | 1051 | 1212 | 9.09721684304 |
| NM_152924 | ABHD2  | 2148 | 2274 | 8.09721684304 |
| NM_152924 | ABHD2  | 4931 | 5054 | 8.09721684304 |
| NM_152924 | ABHD2  | 8015 | 8112 | 7.51224761127 |
| NM_152924 | ABHD2  | 1925 | 2069 | 9.68217934376 |
| NM_152924 | ABHD2  | 4164 | 4226 | 8.01307763366 |
| NM_152924 | ABHD2  | 3225 | 3336 | 6.51225434232 |
| NM_152924 | ABHD2  | 3690 | 3825 | 8.83418243721 |
| NM_152924 | ABHD2  | 7653 | 7726 | 7.51224761127 |
| NM_058243 | BRD4   | 2247 | 2335 | 7.25229155822 |
| NM_058243 | BRD4   | 1207 | 1242 | 5.2521178079  |
| NM_058243 | BRD4   | 1681 | 1744 | 5.16815234883 |
| NM_058243 | BRD4   | 4475 | 4526 | 6.24827395805 |
| NM_058243 | BRD4   | 1546 | 1610 | 6.83725405893 |
| NM_058243 | BRD4   | 4642 | 4732 | 5.25229155822 |
| NM_058243 | BRD4   | 640  | 686  | 5.16815234883 |

|              |        |      |      |               |
|--------------|--------|------|------|---------------|
| NM_058243    | BRD4   | 4809 | 4858 | 6.24827395805 |
| NM_058243    | BRD4   | 698  | 783  | 6.83725405894 |
| NM_058243    | BRD4   | 2123 | 2244 | 6.25229155822 |
| NM_058243    | BRD4   | 1346 | 1517 | 8.57421965311 |
| NM_058243    | BRD4   | 804  | 875  | 6.83725382302 |
| NM_058243    | BRD4   | 205  | 291  | 5.25229155822 |
| NM_058243    | BRD4   | 397  | 594  | 7.25229155822 |
| NM_058243    | BRD4   | 890  | 933  | 5.16815234883 |
| NM_058243    | BRD4   | 5005 | 5176 | 8.57421965311 |
| NM_058246    | DNAJB6 | 1102 | 1179 | 3.5837956829  |
| NM_058246    | DNAJB6 | 2339 | 2415 | 5.58396943322 |
| NM_058246    | DNAJB6 | 561  | 650  | 6.39132435527 |
| NM_058246    | DNAJB6 | 195  | 308  | 5.16893193394 |
| NM_058246    | DNAJB6 | 2138 | 2189 | 5.16892520288 |
| NM_058246    | DNAJB6 | 2003 | 2118 | 6.39132435527 |
| NM_058246    | DNAJB6 | 1644 | 1768 | 5.16893193394 |
| NM_058246    | DNAJB6 | 691  | 837  | 5.16893193394 |
| NM_058246    | DNAJB6 | 1217 | 1483 | 7.83189694666 |
| NM_058246    | DNAJB6 | 70   | 189  | 5.9058975281  |
| NM_058246    | DNAJB6 | 1483 | 1582 | 6.16893193394 |
| NM_058246    | DNAJB6 | 308  | 396  | 5.9058975281  |
| NM_006832    | FERMT2 | 1500 | 1566 | 6.30444911954 |
| NM_006832    | FERMT2 | 1790 | 1856 | 6.30846648379 |
| NM_006832    | FERMT2 | 2027 | 2075 | 5.72350421144 |
| NM_006832    | FERMT2 | 1169 | 1227 | 4.63936500961 |
| NM_006832    | FERMT2 | 2550 | 2608 | 4.72350398307 |
| NM_006832    | FERMT2 | 1913 | 2006 | 6.72350421899 |
| NM_006832    | FERMT2 | 2748 | 2788 | 6.30846671971 |
| NM_006832    | FERMT2 | 507  | 622  | 7.30846671971 |
| NM_006832    | FERMT2 | 1282 | 1384 | 7.04543231388 |
| NM_006832    | FERMT2 | 692  | 758  | 6.30444911954 |
| NM_006832    | FERMT2 | 176  | 253  | 6.72350421899 |
| NM_006832    | FERMT2 | 1684 | 1762 | 5.72350421899 |
| NM_006832    | FERMT2 | 335  | 450  | 5.72350421898 |
| NM_006832    | FERMT2 | 863  | 992  | 6.30846671971 |
| NM_006835    | CCNI   | 569  | 617  | 2.89326838552 |
| NM_006835    | CCNI   | 925  | 975  | 3.89326838552 |
| NM_006835    | CCNI   | 1068 | 1132 | 4.9774075949  |
| NM_006835    | CCNI   | 1515 | 1613 | 4.9774075949  |
| NM_006835    | CCNI   | 1144 | 1372 | 6.78476251696 |
| NM_001024934 | WASF1  | 1053 | 1116 | 6.03920158333 |
| NM_001024934 | WASF1  | 2095 | 2130 | 5.95506237417 |
| NM_001024934 | WASF1  | 2166 | 2193 | 7.03518398338 |
| NM_001024934 | WASF1  | 2362 | 2419 | 7.03518398338 |
| NM_000400    | ERCC2  | 1158 | 1236 | 8.01828046519 |
| NM_000400    | ERCC2  | 2046 | 2082 | 7.01810671487 |
| NM_030752    | TCP1   | 2015 | 2072 | 2.0806904514  |
| NM_030752    | TCP1   | 1496 | 1560 | 3.08470805135 |
| NM_030752    | TCP1   | 407  | 556  | 6.40663614646 |
| NM_030752    | TCP1   | 562  | 618  | 4.40663614646 |

|              |         |      |      |               |
|--------------|---------|------|------|---------------|
| NM_030752    | TCP1    | 1076 | 1474 | 7.89206297363 |
| NM_030752    | TCP1    | 78   | 179  | 3.08470805158 |
| NM_030752    | TCP1    | 1576 | 1973 | 7.47702547436 |
| NM_030752    | TCP1    | 994  | 1073 | 4.40663614646 |
| NM_030752    | TCP1    | 183  | 406  | 6.40663614646 |
| NM_030752    | TCP1    | 624  | 965  | 6.83959555374 |
| NM_017762    | MTMR10  | 4195 | 4275 | 6.32839703782 |
| NM_017762    | MTMR10  | 1571 | 1630 | 7.32839703782 |
| NM_017763    | RNF43   | 1434 | 1481 | 7.61616325219 |
| NM_017763    | RNF43   | 72   | 136  | 7.61616325219 |
| NM_017760    | NCAPG2  | 436  | 523  | 8.84126340392 |
| NM_017760    | NCAPG2  | 642  | 709  | 7.25630090319 |
| NM_017760    | NCAPG2  | 1741 | 1780 | 6.25630090319 |
| NM_017760    | NCAPG2  | 2145 | 2219 | 7.83724580375 |
| NM_017760    | NCAPG2  | 2306 | 2351 | 8.25630089565 |
| NM_017760    | NCAPG2  | 167  | 207  | 6.25630066728 |
| NM_017760    | NCAPG2  | 2412 | 2515 | 9.2563009032  |
| NM_017760    | NCAPG2  | 3726 | 3846 | 8.84126340392 |
| NM_017760    | NCAPG2  | 1353 | 1535 | 9.57822899809 |
| NM_017760    | NCAPG2  | 1555 | 1740 | 9.2563009032  |
| NM_017760    | NCAPG2  | 2728 | 2845 | 8.57822899809 |
| NM_017760    | NCAPG2  | 3014 | 3066 | 7.75712419454 |
| NM_017760    | NCAPG2  | 210  | 324  | 7.2563009032  |
| NM_017760    | NCAPG2  | 3290 | 3429 | 9.2563009032  |
| NM_017761    | PNRC2   | 1376 | 1420 | 3.47601147618 |
| NM_017761    | PNRC2   | 1664 | 1724 | 4.47584445691 |
| NM_017761    | PNRC2   | 1107 | 1216 | 5.79794630212 |
| NM_017761    | PNRC2   | 1860 | 1936 | 3.47601820723 |
| NM_001142424 | MORF4L2 | 1757 | 1812 | 3.84759808753 |
| NM_001142424 | MORF4L2 | 1638 | 1680 | 1.84759785161 |
| NM_001142424 | MORF4L2 | 1812 | 1861 | 3.4325538572  |
| NM_001142424 | MORF4L2 | 1877 | 1961 | 2.84759808753 |
| NM_001142424 | MORF4L2 | 140  | 190  | 1.84742433721 |
| NM_001142424 | MORF4L2 | 1681 | 1727 | 2.84759808753 |
| NM_001142424 | MORF4L2 | 413  | 482  | 3.84759807998 |
| NM_001142424 | MORF4L2 | 1117 | 1190 | 3.43256058825 |
| NM_001142424 | MORF4L2 | 200  | 280  | 2.84759808753 |
| NM_001142424 | MORF4L2 | 1194 | 1317 | 5.30702970617 |
| NM_001142424 | MORF4L2 | 1466 | 1638 | 4.43256058825 |
| NM_001142424 | MORF4L2 | 588  | 725  | 3.43256058824 |
| NM_001142424 | MORF4L2 | 774  | 1103 | 5.93506092878 |
| NM_001142424 | MORF4L2 | 1328 | 1462 | 4.84759808753 |
| NM_021633    | KLHL12  | 861  | 946  | 6.1891302696  |
| NM_021633    | KLHL12  | 1661 | 1725 | 7.1891302696  |
| NM_021633    | KLHL12  | 1501 | 1583 | 7.1891302696  |
| NM_021633    | KLHL12  | 239  | 400  | 8.19314786977 |
| NM_017768    | LRRC40  | 701  | 744  | 8.71132099396 |
| NM_017768    | LRRC40  | 1533 | 1583 | 8.12635849324 |
| NM_017769    | G2E3    | 176  | 261  | 7.51624465771 |
| NM_017769    | G2E3    | 3168 | 3198 | 5.84714294783 |

|              |          |      |      |                    |
|--------------|----------|------|------|--------------------|
| NM_017769    | G2E3     | 1887 | 1933 | 6.92726455704      |
| NM_017769    | G2E3     | 286  | 389  | 7.51222705776      |
| NM_021639    | GPBP1L1  | 2352 | 2398 | 3.17591481806      |
| NM_021639    | GPBP1L1  | 2928 | 2981 | 4.26005401989      |
| NM_021639    | GPBP1L1  | 576  | 635  | 3.25988027712      |
| NM_021639    | GPBP1L1  | 3160 | 3197 | 3.25603642727      |
| NM_021639    | GPBP1L1  | 3318 | 3451 | 4.84501652816      |
| NM_021639    | GPBP1L1  | 1088 | 1183 | 3.25988027712      |
| NM_021639    | GPBP1L1  | 762  | 849  | 5.26004729639      |
| NM_021639    | GPBP1L1  | 1475 | 1539 | 4.84501652794      |
| NM_001042610 | DBNDD1   | 1111 | 1157 | 9.05280283602      |
| NM_001042610 | DBNDD1   | 1883 | 1945 | 7.47185120442      |
| NM_001042610 | DBNDD1   | 1472 | 1519 | 9.47185793548      |
| NM_001042610 | DBNDD1   | 1002 | 1037 | 7.38771872609      |
| NM_001042610 | DBNDD1   | 1293 | 1467 | 9.0568204362       |
| NM_001198682 | NME2     | 213  | 245  | 0.845345065433     |
| NM_001198682 | NME2     | 325  | 457  | 4.65269999504      |
| NM_001198682 | NME2     | 261  | 300  | 0.84132747281      |
| NM_001198682 | NME2     | 464  | 687  | 5.09327258643      |
| NM_001042616 | PIGY     | 915  | 975  | 8.44669653424      |
| NM_001042616 | PIGY     | 547  | 618  | 6.63934137626      |
| NM_001042616 | PIGY     | 785  | 869  | 7.2243041129       |
| NM_001042618 | PARP2    | 851  | 893  | 4.89078439944      |
| NM_001042618 | PARP2    | 373  | 445  | 4.80664519028      |
| NM_001042618 | PARP2    | 1190 | 1262 | 6.47172930021      |
| NM_001042618 | PARP2    | 1592 | 1651 | 4.88676679949      |
| NM_001042618 | PARP2    | 1391 | 1485 | 4.89078416374      |
| NM_001042618 | PARP2    | 581  | 667  | 4.89077766861      |
| NM_001042618 | PARP2    | 919  | 1082 | 7.47574690038      |
| NM_001031827 | BOLA2    | 790  | 857  | 7.84027024277      |
| NM_001031827 | BOLA2    | 664  | 782  | 7.61787782144      |
| NM_001031827 | BOLA2    | 864  | 995  | 7.03291532071      |
| NM_001114118 | C17orf85 |      | 2049 | 2128 5.94087143684 |
| NM_001114118 | C17orf85 |      | 2544 | 2653 5.94087167276 |
| NM_001114118 | C17orf85 |      | 5238 | 5299 4.35590917203 |
| NM_001114118 | C17orf85 |      | 3105 | 3184 5.35590917203 |
| NM_001114118 | C17orf85 |      | 643  | 745 5.35590916449  |
| NM_001114118 | C17orf85 |      | 5375 | 5449 4.35590917203 |
| NM_007362    | NCBP2    | 815  | 847  | 2.74577494046      |
| NM_007362    | NCBP2    | 735  | 814  | 3.56687973646      |
| NM_007362    | NCBP2    | 161  | 291  | 3.56687974401      |
| NM_007362    | NCBP2    | 1869 | 2010 | 2.24495164913      |
| NM_007362    | NCBP2    | 1446 | 1518 | 1.24494491807      |
| NM_007362    | NCBP2    | 376  | 457  | 2.24495164912      |
| NM_007362    | NCBP2    | 534  | 710  | 2.82991414985      |
| NM_203298    | CHCHD1   | 37   | 128  | 5.72458651755      |
| NM_203298    | CHCHD1   | 144  | 254  | 6.04651461266      |
| NM_001017371 | SP3      | 2926 | 2984 | 6.61891163631      |
| NM_001017371 | SP3      | 1570 | 1615 | 5.03779298545      |
| NM_001017371 | SP3      | 3084 | 3142 | 5.03796000471      |



|              |           |      |      |                 |               |
|--------------|-----------|------|------|-----------------|---------------|
| NM_001017371 | SP3       | 780  | 867  | 7.62292923649   |               |
| NM_001017371 | SP3       | 2333 | 2373 | 6.03394913559   |               |
| NM_001017371 | SP3       | 2075 | 2174 | 7.62292923649   |               |
| NM_001017371 | SP3       | 1740 | 1851 | 7.03796673577   |               |
| NM_001017371 | SP3       | 970  | 1143 | 8.20789173721   |               |
| NM_001100607 | SERPINA10 |      | 144  | 188             | 7.41203828878 |
| NM_001100607 | SERPINA10 |      | 1482 | 1540            | 7.4160491579  |
| NM_001100607 | SERPINA10 |      | 370  | 435             | 7.41203828878 |
| NM_001100607 | SERPINA10 |      | 1040 | 1129            | 9.00101838967 |
| NM_001100607 | SERPINA10 |      | 755  | 843             | 9.00101838967 |
| NM_001100607 | SERPINA10 |      | 1297 | 1463            | 10.0010183897 |
| NM_001100607 | SERPINA10 |      | 37   | 137             | 8.4160558814  |
| NM_007364    | TMED3     | 526  | 616  | 7.5287091703    |               |
| NM_007364    | TMED3     | 630  | 678  | 5.94374666957   |               |
| NM_007364    | TMED3     | 680  | 718  | 6.9397290694    |               |
| NM_007364    | TMED3     | 236  | 395  | 8.11367167102   |               |
| NM_007364    | TMED3     | 852  | 899  | 6.52870917007   |               |
| NM_007364    | TMED3     | 1273 | 1385 | 7.75110159163   |               |
| NM_007364    | TMED3     | 410  | 494  | 7.94374666957   |               |
| NM_007364    | TMED3     | 1091 | 1260 | 8.40317828821   |               |
| NM_000239    | LYZ       | 673  | 750  | 1.81879855189   |               |
| NM_000239    | LYZ       | 593  | 623  | 0.233662300851  |               |
| NM_000239    | LYZ       | 1042 | 1123 | -0.766163948831 |               |
| NM_000239    | LYZ       | 907  | 1030 | -0.766163948831 |               |
| NM_000239    | LYZ       | 1134 | 1490 | 4.18803236156   |               |
| NM_000239    | LYZ       | 26   | 580  | 5.27823017053   |               |
| NM_000239    | LYZ       | 751  | 907  | 0.555764146056  |               |
| NM_001135772 | LRP5L     | 1250 | 1303 | 7.80867517127   |               |
| NM_001135772 | LRP5L     | 876  | 919  | 9.3094984626    |               |
| NM_001135772 | LRP5L     | 1108 | 1181 | 9.39363767198   |               |
| NM_001135770 | PVR       | 1122 | 1158 | 7.91480599449   |               |
| NM_001135770 | PVR       | 1395 | 1457 | 8.99894520388   |               |
| NM_001135770 | PVR       | 169  | 229  | 7.99894520388   |               |
| NM_001135770 | PVR       | 1161 | 1276 | 9.99894520388   |               |
| NM_001135770 | PVR       | 692  | 746  | 8.58390769705   |               |
| NM_001135770 | PVR       | 555  | 677  | 9.5839077046    |               |
| NM_001135770 | PVR       | 893  | 1113 | 11.2468727173   |               |
| NM_001135770 | PVR       | 1276 | 1379 | 9.99894520388   |               |
| NM_001135770 | PVR       | 403  | 553  | 10.3208732988   |               |
| NM_001135770 | PVR       | 335  | 394  | 8.58390746868   |               |
| NM_000234    | LIG1      | 2572 | 2666 | 7.54184718281   |               |
| NM_000234    | LIG1      | 1273 | 1359 | 8.12680968353   |               |
| NM_000234    | LIG1      | 3320 | 3370 | 6.53782958264   |               |
| NM_000234    | LIG1      | 347  | 428  | 6.54184045176   |               |
| NM_000234    | LIG1      | 3104 | 3165 | 6.54184717526   |               |
| NM_000235    | LIPA      | 1842 | 1905 | 4.51123444838   |               |
| NM_000235    | LIPA      | 1952 | 1988 | 3.51106069807   |               |
| NM_000235    | LIPA      | 2425 | 2490 | 6.31858937044   |               |
| NM_000235    | LIPA      | 2251 | 2391 | 6.97066606702   |               |
| NM_000235    | LIPA      | 2067 | 2111 | 5.09619021805   |               |

|              |         |      |      |               |
|--------------|---------|------|------|---------------|
| NM_000235    | LIPA    | 2588 | 2654 | 3.51123444838 |
| NM_000235    | LIPA    | 839  | 1252 | 9.68115944983 |
| NM_000235    | LIPA    | 1282 | 1458 | 7.41812504399 |
| NM_000235    | LIPA    | 1474 | 1770 | 8.31858937044 |
| NM_000235    | LIPA    | 235  | 832  | 9.55562856774 |
| NM_000236    | LIPC    | 1254 | 1314 | 8.39704578654 |
| NM_000236    | LIPC    | 310  | 378  | 7.91161895937 |
| NM_000236    | LIPC    | 1393 | 1440 | 6.58968413343 |
| NM_000236    | LIPC    | 1338 | 1386 | 5.58567326431 |
| NM_000236    | LIPC    | 480  | 564  | 6.58969086448 |
| NM_000236    | LIPC    | 566  | 658  | 7.91161895937 |
| NM_000236    | LIPC    | 715  | 857  | 7.91161895937 |
| NM_000236    | LIPC    | 101  | 280  | 8.1746533652  |
| NM_000236    | LIPC    | 1166 | 1244 | 7.1746533652  |
| NM_148908    | OSBPL9  | 2311 | 2401 | 5.90628994956 |
| NM_148908    | OSBPL9  | 2686 | 2749 | 4.90628994956 |
| NM_148908    | OSBPL9  | 1410 | 1462 | 5.9062964447  |
| NM_148908    | OSBPL9  | 2505 | 2557 | 6.90629668062 |
| NM_148908    | OSBPL9  | 794  | 889  | 5.90629668062 |
| NM_148908    | OSBPL9  | 1308 | 1409 | 4.90227908045 |
| NM_148908    | OSBPL9  | 321  | 439  | 6.49125917379 |
| NM_148908    | OSBPL9  | 1740 | 1869 | 7.49125918134 |
| NM_001193552 | ZNF850  | 5538 | 5615 | 11.1915966604 |
| NM_006178    | NSF     | 2237 | 2304 | 6.35873685899 |
| NM_006178    | NSF     | 877  | 927  | 6.35873662308 |
| NM_006178    | NSF     | 727  | 793  | 6.35873012795 |
| NM_006178    | NSF     | 1374 | 1416 | 5.35873012795 |
| NM_006178    | NSF     | 1771 | 1844 | 7.35873685145 |
| NM_006178    | NSF     | 1475 | 1544 | 5.35856310868 |
| NM_006178    | NSF     | 3484 | 3517 | 6.35471925883 |
| NM_006178    | NSF     | 385  | 450  | 6.94369262867 |
| NM_006178    | NSF     | 2330 | 2476 | 8.52866186044 |
| NM_006178    | NSF     | 1226 | 1341 | 6.94369935972 |
| NM_006178    | NSF     | 1859 | 1943 | 5.35873662308 |
| NM_006178    | NSF     | 1660 | 1762 | 5.35471925883 |
| NM_139067    | SMARCC2 | 814  | 892  | 7.44194152956 |
| NM_139067    | SMARCC2 | 694  | 787  | 6.85697902884 |
| NM_139067    | SMARCC2 | 2127 | 2175 | 6.85697902883 |
| NM_139067    | SMARCC2 | 4717 | 4789 | 5.85697879292 |
| NM_139067    | SMARCC2 | 2242 | 2292 | 5.85697879292 |
| NM_139067    | SMARCC2 | 2187 | 2227 | 5.85296142866 |
| NM_139067    | SMARCC2 | 1455 | 1568 | 8.44194152956 |
| NM_139067    | SMARCC2 | 505  | 550  | 6.77283981945 |
| NM_139067    | SMARCC2 | 4450 | 4496 | 6.85296142866 |
| NM_139067    | SMARCC2 | 2034 | 2084 | 6.85697879292 |
| NM_139067    | SMARCC2 | 2879 | 2979 | 5.85697902884 |
| NM_139067    | SMARCC2 | 1297 | 1400 | 6.85697902884 |
| NM_139067    | SMARCC2 | 4086 | 4193 | 8.17890712372 |
| NM_139067    | SMARCC2 | 3674 | 3795 | 8.44194152933 |
| NM_006170    | NOP2    | 1539 | 1626 | 7.56360624982 |

|           |       |      |      |               |
|-----------|-------|------|------|---------------|
| NM_006170 | NOP2  | 1476 | 1527 | 4.97864351318 |
| NM_006170 | NOP2  | 721  | 792  | 5.9786437491  |
| NM_006170 | NOP2  | 2293 | 2348 | 5.9786437491  |
| NM_006170 | NOP2  | 2592 | 2650 | 5.9786437491  |
| NM_006170 | NOP2  | 1652 | 1768 | 8.30057184399 |
| NM_006170 | NOP2  | 441  | 590  | 7.30057184399 |
| NM_006170 | NOP2  | 1874 | 1996 | 6.56360624982 |
| NM_006170 | NOP2  | 2015 | 2144 | 5.9786437491  |
| NM_006170 | NOP2  | 170  | 315  | 6.56360624982 |
| NM_006170 | NOP2  | 818  | 1221 | 9.22657126254 |
| NM_006170 | NOP2  | 1268 | 1413 | 7.30057184399 |
| NM_003453 | ZMYM2 | 1378 | 1441 | 7.06100772557 |
| NM_003453 | ZMYM2 | 3908 | 3959 | 7.06100771824 |
| NM_003453 | ZMYM2 | 4002 | 4037 | 6.05699012562 |
| NM_003453 | ZMYM2 | 2557 | 2608 | 7.05699012562 |
| NM_003453 | ZMYM2 | 4819 | 4902 | 8.06100772579 |
| NM_003453 | ZMYM2 | 3221 | 3318 | 6.06100099474 |
| NM_003453 | ZMYM2 | 2721 | 2788 | 6.05699012562 |
| NM_003453 | ZMYM2 | 1665 | 1768 | 8.06100771824 |
| NM_003453 | ZMYM2 | 2858 | 2947 | 8.38293582046 |
| NM_003453 | ZMYM2 | 4974 | 5005 | 5.97686851641 |
| NM_153712 | TTL   | 1134 | 1189 | 8.74403393329 |
| NM_153712 | TTL   | 1040 | 1083 | 8.15505383262 |
| NM_153712 | TTL   | 1794 | 1836 | 8.07493222341 |
| NM_153712 | TTL   | 4795 | 4824 | 7.15906470174 |
| NM_153712 | TTL   | 4461 | 4503 | 7.15505383262 |
| NM_153712 | TTL   | 921  | 965  | 7.15505383262 |
| NM_153712 | TTL   | 1910 | 1995 | 9.96642635485 |
| NM_153712 | TTL   | 535  | 594  | 8.74403392597 |
| NM_153712 | TTL   | 3881 | 3975 | 8.7440336976  |
| NM_153712 | TTL   | 4019 | 4170 | 7.1590714328  |
| NM_153712 | TTL   | 1655 | 1794 | 9.96642635485 |
| NM_153712 | TTL   | 4608 | 4661 | 8.15889768248 |
| NM_153712 | TTL   | 215  | 333  | 7.15907142525 |
| NM_153713 | LIX1L | 579  | 634  | 9.91509534967 |
| NM_153713 | LIX1L | 2756 | 2816 | 8.33013308486 |
| NM_153713 | LIX1L | 2835 | 2955 | 9.33013308486 |
| NM_153717 | EVC   | 1704 | 1751 | 7.92246704897 |
| NM_153719 | NUP62 | 3038 | 3117 | 7.2558803537  |
| NM_153719 | NUP62 | 2095 | 2192 | 9.13034947162 |
| NM_153719 | NUP62 | 3210 | 3276 | 7.99284594787 |
| NM_153719 | NUP62 | 1968 | 2022 | 7.67091784543 |
| NM_153719 | NUP62 | 2207 | 2269 | 6.67091784543 |
| NM_153719 | NUP62 | 2989 | 3026 | 7.67091112192 |
| NM_153719 | NUP62 | 1101 | 1191 | 7.99284594787 |
| NM_153719 | NUP62 | 640  | 737  | 7.99284594787 |
| NM_153719 | NUP62 | 3278 | 3405 | 8.47827277504 |
| NM_153719 | NUP62 | 3137 | 3210 | 5.67091785297 |
| NM_153719 | NUP62 | 422  | 530  | 7.2558803537  |
| NM_153719 | NUP62 | 1626 | 1689 | 5.67091784543 |

|              |        |      |      |               |
|--------------|--------|------|------|---------------|
| NM_153719    | NUP62  | 1705 | 1843 | 5.67091785298 |
| NM_153719    | NUP62  | 2539 | 2621 | 5.67091785297 |
| NM_153719    | NUP62  | 320  | 412  | 6.67091785298 |
| NM_004897    | MINPP1 | 2177 | 2223 | 8.28619235016 |
| NM_004897    | MINPP1 | 2580 | 2657 | 5.96426449119 |
| NM_004897    | MINPP1 | 2003 | 2040 | 6.96426449118 |
| NM_004897    | MINPP1 | 432  | 677  | 10.1341894926 |
| NM_004897    | MINPP1 | 2660 | 2784 | 10.0517273324 |
| NM_004897    | MINPP1 | 1287 | 1519 | 10.5492269919 |
| NM_004897    | MINPP1 | 1763 | 1981 | 10.356581914  |
| NM_004897    | MINPP1 | 2419 | 2512 | 5.96426449118 |
| NM_004897    | MINPP1 | 846  | 1250 | 11.4561175875 |
| NM_004897    | MINPP1 | 2229 | 2414 | 9.96426449119 |
| NM_004897    | MINPP1 | 2042 | 2158 | 9.28619258608 |
| NM_004897    | MINPP1 | 1541 | 1758 | 10.9184608016 |
| NM_004546    | NDUFB2 | 244  | 306  | 8.38904160093 |
| NM_004546    | NDUFB2 | 309  | 464  | 8.54104469437 |
| NM_004545    | NDUFB1 | 330  | 421  | 4.26428291554 |
| NM_004545    | NDUFB1 | 138  | 226  | 5.84924541626 |
| NM_004545    | NDUFB1 | 228  | 301  | 5.26428291554 |
| NM_001199155 | KAT7   | 382  | 427  | 7.04942775585 |
| NM_001199155 | KAT7   | 3263 | 3363 | 5.46447198596 |
| NM_001199155 | KAT7   | 1523 | 1566 | 6.46429823587 |
| NM_001199155 | KAT7   | 1756 | 1804 | 6.46446525513 |
| NM_001199155 | KAT7   | 3043 | 3127 | 7.46447197863 |
| NM_001199155 | KAT7   | 2894 | 2976 | 6.46429823587 |
| NM_001199155 | KAT7   | 967  | 1043 | 7.04541688673 |
| NM_001199155 | KAT7   | 2477 | 2543 | 6.46045438601 |
| NM_001199155 | KAT7   | 2211 | 2280 | 7.04943448691 |
| NM_001199155 | KAT7   | 545  | 660  | 7.46447198618 |
| NM_001199155 | KAT7   | 2075 | 2205 | 5.46447198596 |
| NM_001080450 | BEND3  | 711  | 776  | 11.6797729836 |
| NM_001080452 | GPR108 | 1642 | 1684 | 6.13150097422 |
| NM_001080452 | GPR108 | 1577 | 1640 | 8.1355185744  |
| NM_001080452 | GPR108 | 1112 | 1175 | 7.1355185744  |
| NM_001080452 | GPR108 | 299  | 367  | 8.1355185744  |
| NM_001080452 | GPR108 | 589  | 650  | 7.13534482408 |
| NM_001080452 | GPR108 | 1381 | 1428 | 8.13551857439 |
| NM_001080452 | GPR108 | 797  | 835  | 6.05137936501 |
| NM_001080452 | GPR108 | 842  | 949  | 8.45744666928 |
| NM_001080452 | GPR108 | 1015 | 1104 | 6.13534482408 |
| NM_001080452 | GPR108 | 658  | 754  | 8.45744666928 |
| NM_001080452 | GPR108 | 1194 | 1330 | 9.30544357584 |
| NM_001080452 | GPR108 | 403  | 478  | 8.45744666928 |
| NM_001080453 | INTS1  | 4440 | 4485 | 7.04107815646 |
| NM_001080453 | INTS1  | 1769 | 1828 | 8.04125167086 |
| NM_001080453 | INTS1  | 5407 | 5457 | 7.04125167086 |
| NM_001080453 | INTS1  | 3604 | 3642 | 7.95711269739 |
| NM_001080453 | INTS1  | 4367 | 4421 | 8.04125167086 |
| NM_001080453 | INTS1  | 2133 | 2298 | 9.04125190677 |

|              |       |      |      |               |
|--------------|-------|------|------|---------------|
| NM_001080453 | INTS1 | 746  | 862  | 8.6262144075  |
| NM_001080453 | INTS1 | 321  | 409  | 8.04125190677 |
| NM_001080453 | INTS1 | 1951 | 2006 | 6.95711269739 |
| NM_001080453 | INTS1 | 3424 | 3485 | 8.6262144075  |
| NM_001080453 | INTS1 | 410  | 441  | 8.04107815646 |
| NM_001080453 | INTS1 | 1897 | 1945 | 8.04125190655 |
| NM_001080453 | INTS1 | 2845 | 2914 | 7.04125190655 |
| NM_001080453 | INTS1 | 3720 | 3822 | 10.0412519068 |
| NM_001080453 | INTS1 | 2652 | 2735 | 7.04125190655 |
| NM_001080453 | INTS1 | 2934 | 3043 | 8.6262144075  |
| NM_001080453 | INTS1 | 442  | 499  | 8.62604065718 |
| NM_001080453 | INTS1 | 3872 | 3971 | 8.04125190677 |
| NM_001080453 | INTS1 | 6207 | 6248 | 6.95711269739 |
| NM_001080453 | INTS1 | 209  | 271  | 9.0372343066  |
| NM_001080453 | INTS1 | 6261 | 6389 | 9.36318000166 |
| NM_001080453 | INTS1 | 1234 | 1363 | 8.04125190677 |
| NM_001080453 | INTS1 | 2007 | 2114 | 7.04125190677 |
| NM_001080453 | INTS1 | 2379 | 2483 | 8.04125190677 |
| NM_001080453 | INTS1 | 5739 | 5863 | 9.04125190677 |
| NM_001080453 | INTS1 | 3056 | 3106 | 7.04124517572 |
| NM_001080453 | INTS1 | 1370 | 1521 | 7.04125190677 |
| NM_001080453 | INTS1 | 4749 | 4818 | 8.04124517572 |
| NM_001080453 | INTS1 | 631  | 728  | 8.04125190677 |
| NM_006391    | IP07  | 2532 | 2585 | 5.3245386951  |
| NM_006391    | IP07  | 1608 | 1703 | 5.49446369654 |
| NM_006391    | IP07  | 1511 | 1596 | 3.9095009599  |
| NM_006391    | IP07  | 668  | 750  | 5.49446369654 |
| NM_006391    | IP07  | 831  | 872  | 3.82536198644 |
| NM_006391    | IP07  | 219  | 311  | 5.3245386951  |
| NM_006391    | IP07  | 2425 | 2514 | 4.90950119582 |
| NM_006391    | IP07  | 4083 | 4142 | 2.32052109493 |
| NM_006391    | IP07  | 3263 | 3306 | 3.82536198644 |
| NM_006391    | IP07  | 1129 | 1178 | 3.90950119582 |
| NM_006391    | IP07  | 4006 | 4069 | 2.24039948572 |
| NM_006391    | IP07  | 2151 | 2260 | 4.32453869488 |
| NM_006391    | IP07  | 2261 | 2315 | 2.24039948572 |
| NM_006391    | IP07  | 5200 | 5258 | 3.9095011956  |
| NM_006391    | IP07  | 981  | 1057 | 4.3245386951  |
| NM_006391    | IP07  | 751  | 829  | 4.64646678999 |
| NM_006391    | IP07  | 4437 | 4496 | 4.3245386951  |
| NM_006391    | IP07  | 1745 | 1883 | 5.3245386951  |
| NM_006391    | IP07  | 125  | 218  | 3.32453869509 |
| NM_006391    | IP07  | 3033 | 3156 | 4.64646678999 |
| NM_006391    | IP07  | 4222 | 4261 | 2.24039948572 |
| NM_006391    | IP07  | 2359 | 2411 | 3.32052109493 |
| NM_006391    | IP07  | 329  | 381  | 3.32052109493 |
| NM_006391    | IP07  | 1420 | 1474 | 2.24039948572 |
| NM_006391    | IP07  | 3769 | 3860 | 4.64646678999 |
| NM_006391    | IP07  | 2591 | 3017 | 7.78397031374 |
| NM_006391    | IP07  | 872  | 970  | 4.90950119582 |

|           |          |      |      |                   |
|-----------|----------|------|------|-------------------|
| NM_006391 | IP07     | 1955 | 2125 | 6.02497841324     |
| NM_006391 | IP07     | 460  | 598  | 5.64646678999     |
| NM_006391 | IP07     | 1201 | 1399 | 6.3245386951      |
| NM_006390 | IP08     | 1414 | 1462 | 5.35595710441     |
| NM_006390 | IP08     | 1738 | 1780 | 6.94091960513     |
| NM_006390 | IP08     | 3204 | 3273 | 6.35596383524     |
| NM_006390 | IP08     | 5100 | 5162 | 6.35194623529     |
| NM_006390 | IP08     | 4249 | 4301 | 6.27182462608     |
| NM_006390 | IP08     | 905  | 997  | 6.94092633619     |
| NM_006390 | IP08     | 2241 | 2331 | 7.35596359955     |
| NM_006390 | IP08     | 1031 | 1106 | 7.67789193035     |
| NM_006390 | IP08     | 4034 | 4108 | 6.93690873601     |
| NM_006390 | IP08     | 1833 | 1967 | 6.94092632864     |
| NM_006390 | IP08     | 2383 | 2439 | 7.67789193035     |
| NM_006390 | IP08     | 593  | 658  | 6.27182462608     |
| NM_006390 | IP08     | 2743 | 2892 | 7.94092633619     |
| NM_006390 | IP08     | 1577 | 1688 | 6.94091960513     |
| NM_006390 | IP08     | 2583 | 2649 | 6.93690873601     |
| NM_139280 | ORMDL3   | 479  | 508  | 3.19082810361     |
| NM_139280 | ORMDL3   | 221  | 321  | 5.19100161801     |
| NM_139280 | ORMDL3   | 681  | 755  | 4.19082810361     |
| NM_139280 | ORMDL3   | 820  | 959  | 4.19100185393     |
| NM_006392 | NOP56    | 767  | 993  | 6.02309735473     |
| NM_006392 | NOP56    | 1891 | 1963 | 3.32248388627     |
| NM_006392 | NOP56    | 138  | 223  | 4.32265763659     |
| NM_006392 | NOP56    | 1070 | 1572 | 7.07754513875     |
| NM_006392 | NOP56    | 438  | 753  | 6.41012047784     |
| NM_006392 | NOP56    | 248  | 407  | 4.64458573148     |
| NM_006395 | ATG7     | 160  | 240  | 9.66318629428     |
| NM_006395 | ATG7     | 1912 | 1977 | 8.07821707006     |
| NM_006395 | ATG7     | 1221 | 1249 | 8.07821707006     |
| NM_006397 | RNASEH2A |      | 918  | 971 5.4330284026  |
| NM_006397 | RNASEH2A |      | 284  | 372 7.02200850349 |
| NM_006397 | RNASEH2A |      | 381  | 455 7.75897409744 |
| NM_006397 | RNASEH2A |      | 455  | 552 6.43704600277 |
| NM_006397 | RNASEH2A |      | 654  | 707 5.43704599522 |
| NM_006397 | RNASEH2A |      | 198  | 279 7.43704600277 |
| NM_006398 | UBD      | 474  | 518  | 6.87202693394     |
| NM_006398 | UBD      | 752  | 815  | 7.3712036426      |
| NM_006398 | UBD      | 923  | 988  | 6.37120363505     |
| NM_006398 | UBD      | 816  | 913  | 8.17855856466     |
| NM_006398 | UBD      | 201  | 464  | 9.83063526124     |
| NM_006398 | UBD      | 531  | 710  | 9.45866648385     |
| NM_020119 | ZC3HAV1  | 737  | 798  | 7.77568696618     |
| NM_020119 | ZC3HAV1  | 3042 | 3132 | 8.19073096059     |
| NM_020119 | ZC3HAV1  | 465  | 519  | 7.18671359634     |
| NM_020119 | ZC3HAV1  | 2746 | 2798 | 7.1905574462      |
| NM_020119 | ZC3HAV1  | 3667 | 3717 | 7.18671359634     |
| NM_020119 | ZC3HAV1  | 2656 | 2702 | 6.1905574462      |
| NM_020119 | ZC3HAV1  | 1604 | 1667 | 6.19073119629     |

|              |         |      |      |               |
|--------------|---------|------|------|---------------|
| NM_020119    | ZC3HAV1 | 914  | 969  | 7.77551994692 |
| NM_020119    | ZC3HAV1 | 614  | 652  | 7.18671359634 |
| NM_020119    | ZC3HAV1 | 1070 | 1202 | 7.77569369723 |
| NM_020119    | ZC3HAV1 | 4515 | 4588 | 7.77167609706 |
| NM_020119    | ZC3HAV1 | 1879 | 1962 | 7.77167609706 |
| NM_020119    | ZC3HAV1 | 2502 | 2553 | 7.1905574462  |
| NM_020119    | ZC3HAV1 | 2007 | 2258 | 10.0976217921 |
| NM_020119    | ZC3HAV1 | 1506 | 1587 | 6.19073119651 |
| NM_001098787 | BET1L   | 2010 | 2063 | 5.8302341805  |
| NM_001098787 | BET1L   | 2384 | 2448 | 6.41519668122 |
| NM_001184702 | GYG2    | 2159 | 2219 | 8.91318423459 |
| NM_024665    | TBL1XR1 | 6139 | 6218 | 7.47066674416 |
| NM_024665    | TBL1XR1 | 1624 | 1671 | 5.88168664326 |
| NM_024665    | TBL1XR1 | 3101 | 3155 | 8.47066674416 |
| NM_024665    | TBL1XR1 | 6308 | 6413 | 7.47066674416 |
| NM_024665    | TBL1XR1 | 1777 | 1845 | 6.88570424344 |
| NM_024665    | TBL1XR1 | 5430 | 5470 | 6.88168664326 |
| NM_024665    | TBL1XR1 | 471  | 533  | 5.88570424343 |
| NM_024665    | TBL1XR1 | 6087 | 6138 | 7.88570424344 |
| NM_024665    | TBL1XR1 | 2438 | 2527 | 5.88570424343 |
| NM_024665    | TBL1XR1 | 3830 | 3914 | 6.88570424344 |
| NM_024665    | TBL1XR1 | 2027 | 2086 | 5.88168664326 |
| NM_024665    | TBL1XR1 | 3496 | 3565 | 6.88570424321 |
| NM_024665    | TBL1XR1 | 4403 | 4494 | 7.88570424344 |
| NM_024665    | TBL1XR1 | 4317 | 4378 | 6.88570424344 |
| NM_024665    | TBL1XR1 | 3209 | 3259 | 5.88168664326 |
| NM_024665    | TBL1XR1 | 738  | 924  | 8.47066674416 |
| NM_024665    | TBL1XR1 | 5921 | 6029 | 7.88570424344 |
| NM_024665    | TBL1XR1 | 6229 | 6307 | 6.80156503405 |
| NM_024665    | TBL1XR1 | 5217 | 5326 | 5.88570424344 |
| NM_024665    | TBL1XR1 | 2767 | 2869 | 5.88570424344 |
| NM_024665    | TBL1XR1 | 1279 | 1431 | 8.88570424344 |
| NM_024665    | TBL1XR1 | 4571 | 4656 | 7.88570424344 |
| NM_024665    | TBL1XR1 | 1672 | 1734 | 5.88553049312 |
| NM_024664    | PPCS    | 567  | 707  | 7.53646527572 |
| NM_024667    | VPS37B  | 2423 | 2515 | 8.57072829688 |
| NM_024667    | VPS37B  | 1252 | 1319 | 8.56671742776 |
| NM_024666    | AAGAB   | 369  | 398  | 7.41902052474 |
| NM_024666    | AAGAB   | 413  | 476  | 7.83807562397 |
| NM_024666    | AAGAB   | 316  | 367  | 7.83790187387 |
| NM_024666    | AAGAB   | 175  | 262  | 8.83807562419 |
| NM_024666    | AAGAB   | 582  | 696  | 6.83807562419 |
| NM_005852    | CHD3    | 3578 | 3636 | 7.88226752986 |
| NM_005852    | CHD3    | 3171 | 3240 | 7.88226729394 |
| NM_005852    | CHD3    | 6389 | 6495 | 7.88226752986 |
| NM_005852    | CHD3    | 3931 | 3980 | 8.46321243041 |
| NM_005852    | CHD3    | 5247 | 5321 | 7.88226752985 |
| NM_005852    | CHD3    | 3373 | 3451 | 8.46723002303 |
| NM_005851    | CDK2AP2 | 997  | 1085 | 9.50053273511 |
| NM_005851    | CDK2AP2 | 726  | 839  | 11.6704577366 |

|              |          |      |      |               |               |
|--------------|----------|------|------|---------------|---------------|
| NM_005851    | CDK2AP2  | 861  | 933  | 9.50053273511 |               |
| NM_005851    | CDK2AP2  | 1324 | 1430 | 11.0854952358 |               |
| NM_005850    | SF3B4    | 883  | 915  | 7.37831108878 |               |
| NM_005850    | SF3B4    | 946  | 1121 | 9.96729118967 |               |
| NM_005850    | SF3B4    | 755  | 842  | 9.18968361101 |               |
| NM_005850    | SF3B4    | 648  | 746  | 9.18968361101 |               |
| NM_005850    | SF3B4    | 1284 | 1395 | 8.38232868895 |               |
| NM_005850    | SF3B4    | 1773 | 1859 | 9.18968361101 |               |
| NM_005850    | SF3B4    | 1121 | 1214 | 8.70425678384 |               |
| NM_005850    | SF3B4    | 1894 | 1960 | 7.96729118967 |               |
| NM_005850    | SF3B4    | 449  | 634  | 9.96729118967 |               |
| NM_005857    | ZMPSTE24 |      | 914  | 1005          | 8.05580979165 |
| NM_005857    | ZMPSTE24 |      | 1818 | 1879          | 6.73388168921 |
| NM_005857    | ZMPSTE24 |      | 3035 | 3094          | 8.05580979165 |
| NM_005857    | ZMPSTE24 |      | 875  | 914           | 5.64974248738 |
| NM_005857    | ZMPSTE24 |      | 2017 | 2105          | 8.05580979165 |
| NM_005857    | ZMPSTE24 |      | 2228 | 2274          | 7.73388169675 |
| NM_005857    | ZMPSTE24 |      | 1896 | 2000          | 8.31884419748 |
| NM_005857    | ZMPSTE24 |      | 2275 | 2439          | 9.4343214149  |
| NM_005857    | ZMPSTE24 |      | 222  | 648           | 11.6407722924 |
| NM_005857    | ZMPSTE24 |      | 2758 | 2910          | 9.05580979165 |
| NM_005857    | ZMPSTE24 |      | 1481 | 1756          | 11.1261991195 |
| NM_005857    | ZMPSTE24 |      | 1017 | 1156          | 9.05580979165 |
| NM_005857    | ZMPSTE24 |      | 648  | 875           | 10.5918626919 |
| NM_005857    | ZMPSTE24 |      | 1164 | 1460          | 10.5918626919 |
| NM_005858    | AKAP8    | 1189 | 1284 | 7.20652493045 |               |
| NM_001130850 | CAB39    | 338  | 397  | 5.98306924967 |               |
| NM_001130850 | CAB39    | 1835 | 1888 | 5.97905164972 |               |
| NM_001130850 | CAB39    | 2406 | 2565 | 5.98306924989 |               |
| NM_001130850 | CAB39    | 503  | 743  | 7.39810674917 |               |
| NM_001130850 | CAB39    | 1450 | 1662 | 7.85753836781 |               |
| NM_018622    | PARL     | 722  | 781  | 8.10034882385 |               |
| NM_018622    | PARL     | 1035 | 1115 | 6.77842072897 |               |
| NM_018622    | PARL     | 348  | 399  | 7.36338299377 |               |
| NM_018622    | PARL     | 1177 | 1213 | 6.69428151958 |               |
| NM_002492    | NDUFB5   | 643  | 685  | 4.37440025244 |               |
| NM_002492    | NDUFB5   | 688  | 756  | 3.70931614251 |               |
| NM_002492    | NDUFB5   | 927  | 982  | 3.79328160157 |               |
| NM_002492    | NDUFB5   | 372  | 473  | 4.79345535189 |               |
| NM_002492    | NDUFB5   | 475  | 609  | 5.79345535189 |               |
| NM_002492    | NDUFB5   | 84   | 269  | 6.11538344678 |               |
| NM_002492    | NDUFB5   | 776  | 902  | 4.37841785261 |               |
| NM_002490    | NDUFA6   | 187  | 237  | 4.67804670116 |               |
| NM_002490    | NDUFA6   | 258  | 453  | 6.63665502846 |               |
| NM_002491    | NDUFB3   | 662  | 720  | 5.52869578033 |               |
| NM_002491    | NDUFB3   | 535  | 661  | 7.75108820166 |               |
| NM_002491    | NDUFB3   | 279  | 388  | 4.9437332796  |               |
| NM_002496    | NDUFS8   | 163  | 197  | 5.82678029805 |               |
| NM_002496    | NDUFS8   | 222  | 348  | 8.52739376651 |               |
| NM_002496    | NDUFS8   | 490  | 584  | 6.82695404837 |               |



|              |           |      |      |               |                 |
|--------------|-----------|------|------|---------------|-----------------|
| NM_002496    | NDUFS8    | 588  | 733  | 7.14888214325 |                 |
| NM_002494    | NDUFC1    | 437  | 514  | 3.09032553758 |                 |
| NM_002494    | NDUFC1    | 614  | 732  | 4.67930563848 |                 |
| NM_002495    | NDUFS4    | 503  | 545  | 3.1303441084  |                 |
| NM_002495    | NDUFS4    | 548  | 619  | 5.53641141244 |                 |
| NM_002495    | NDUFS4    | 117  | 197  | 5.21448331778 |                 |
| NM_031243    | HNRNPA2B1 |      | 3535 | 3576          | 1.86930175535   |
| NM_031243    | HNRNPA2B1 |      | 2482 | 2586          | 2.19122985778   |
| NM_031243    | HNRNPA2B1 |      | 2275 | 2325          | 0.869301526979  |
| NM_031243    | HNRNPA2B1 |      | 2144 | 2184          | -0.130704968156 |
| NM_031243    | HNRNPA2B1 |      | 63   | 252           | 4.45426426362   |
| NM_031243    | HNRNPA2B1 |      | 2341 | 2429          | 1.8693017629    |
| NM_031243    | HNRNPA2B1 |      | 3365 | 3465          | 1.45426426362   |
| NM_031243    | HNRNPA2B1 |      | 256  | 1215          | 6.97782621968   |
| NM_031243    | HNRNPA2B1 |      | 2609 | 3141          | 4.19122985778   |
| NM_031243    | HNRNPA2B1 |      | 1217 | 1443          | 3.03922676434   |
| NM_031243    | HNRNPA2B1 |      | 3175 | 3358          | 3.19122985778   |
| NM_031243    | HNRNPA2B1 |      | 1445 | 1971          | 5.56974148104   |
| NM_001136108 | R3HCC1    | 890  | 952  | 7.09744593545 |                 |
| NM_001136108 | R3HCC1    | 204  | 264  | 7.09744592812 |                 |
| NM_152392    | AHSA2     | 1977 | 2025 | 2.20563086787 |                 |
| NM_152392    | AHSA2     | 168  | 216  | 2.12149838954 |                 |
| NM_152392    | AHSA2     | 2310 | 2388 | 2.20563759892 |                 |
| NM_152392    | AHSA2     | 1719 | 1830 | 3.20563759892 |                 |
| NM_152392    | AHSA2     | 1122 | 1280 | 2.20563759892 |                 |
| NM_152392    | AHSA2     | 1425 | 1516 | 3.20563759892 |                 |
| NM_152392    | AHSA2     | 939  | 1106 | 3.20563759892 |                 |
| NM_152392    | AHSA2     | 591  | 672  | 3.20563086787 |                 |
| NM_152396    | METTL6    | 914  | 978  | 7.13824793865 |                 |
| NM_152396    | METTL6    | 674  | 755  | 7.87522002795 |                 |
| NM_015219    | EXOC7     | 1803 | 1877 | 5.79004843497 |                 |
| NM_015219    | EXOC7     | 996  | 1047 | 5.37483718538 |                 |
| NM_015219    | EXOC7     | 2842 | 2908 | 5.37501093569 |                 |
| NM_015219    | EXOC7     | 1427 | 1497 | 4.70590922559 |                 |
| NM_015219    | EXOC7     | 225  | 282  | 3.79004843497 |                 |
| NM_015219    | EXOC7     | 2755 | 2815 | 4.7860308348  |                 |
| NM_015219    | EXOC7     | 734  | 820  | 6.37501093569 |                 |
| NM_015219    | EXOC7     | 4332 | 4439 | 5.37501093569 |                 |
| NM_015219    | EXOC7     | 292  | 368  | 4.79004170392 |                 |
| NM_015219    | EXOC7     | 909  | 939  | 5.37483718538 |                 |
| NM_015219    | EXOC7     | 3915 | 3992 | 3.79004170392 |                 |
| NM_015219    | EXOC7     | 1258 | 1411 | 6.37501093569 |                 |
| NM_015219    | EXOC7     | 575  | 669  | 6.37501093569 |                 |
| NM_015219    | EXOC7     | 2213 | 2343 | 3.79004843497 |                 |
| NM_015219    | EXOC7     | 436  | 559  | 4.79004843475 |                 |
| NM_015219    | EXOC7     | 1515 | 1721 | 6.59740335703 |                 |
| NM_015219    | EXOC7     | 2074 | 2163 | 3.79004843497 |                 |
| NM_015219    | EXOC7     | 132  | 223  | 3.7860308348  |                 |
| NM_015210    | CCDC165   | 5591 | 5633 | 10.3263181814 |                 |
| NM_015210    | CCDC165   | 5412 | 5512 | 10.4104573908 |                 |

|              |         |      |      |               |
|--------------|---------|------|------|---------------|
| NM_015210    | CCDC165 | 163  | 201  | 10.4102836405 |
| NM_015210    | CCDC165 | 265  | 342  | 10.4104573908 |
| NM_018332    | DDX19A  | 285  | 356  | 4.25623186337 |
| NM_018332    | DDX19A  | 100  | 151  | 3.1722664043  |
| NM_018332    | DDX19A  | 889  | 934  | 4.25623186337 |
| NM_018332    | DDX19A  | 1178 | 1241 | 4.25238801351 |
| NM_018332    | DDX19A  | 1094 | 1133 | 4.1722664043  |
| NM_018332    | DDX19A  | 671  | 818  | 3.25640561368 |
| NM_015213    | DENND5A | 1287 | 1349 | 5.62593912671 |
| NM_015213    | DENND5A | 3934 | 4016 | 5.54179992487 |
| NM_015213    | DENND5A | 472  | 530  | 6.6259324032  |
| NM_015213    | DENND5A | 3082 | 3166 | 6.62593913403 |
| NM_015213    | DENND5A | 1125 | 1278 | 7.62593913426 |
| NM_015213    | DENND5A | 1741 | 1843 | 7.62593913425 |
| NM_015216    | PPIP5K2 | 3668 | 3723 | 7.70935219823 |
| NM_015216    | PPIP5K2 | 583  | 667  | 8.12438969751 |
| NM_015216    | PPIP5K2 | 4056 | 4119 | 8.12439619264 |
| NM_015216    | PPIP5K2 | 5396 | 5469 | 8.44632428753 |
| NM_018337    | ZNF444  | 1213 | 1268 | 8.87171800207 |
| NM_018337    | ZNF444  | 555  | 603  | 8.28676223218 |
| NM_018337    | ZNF444  | 1864 | 1989 | 7.2867622324  |
| NM_018337    | ZNF444  | 1401 | 1553 | 9.60869032729 |
| NM_001193304 | TMEM127 | 534  | 651  | 8.58441790549 |
| NM_001193304 | TMEM127 | 1768 | 1839 | 7.3620254766  |
| NM_001193304 | TMEM127 | 3877 | 3951 | 5.77706298343 |
| NM_001193304 | TMEM127 | 1968 | 2038 | 6.77304538326 |
| NM_001193304 | TMEM127 | 2154 | 2218 | 5.77705625238 |
| NM_001193304 | TMEM127 | 2678 | 2756 | 8.09899107832 |
| NM_001193304 | TMEM127 | 1040 | 1111 | 6.77705625238 |
| NM_001193304 | TMEM127 | 2464 | 2542 | 5.77706298343 |
| NM_001193304 | TMEM127 | 1476 | 1523 | 7.36185173383 |
| NM_001193304 | TMEM127 | 1263 | 1319 | 5.69292377405 |
| NM_001193304 | TMEM127 | 682  | 732  | 7.77706297588 |
| NM_001193304 | TMEM127 | 2219 | 2281 | 7.77706297588 |
| NM_001193304 | TMEM127 | 3261 | 3300 | 5.77705625238 |
| NM_001193304 | TMEM127 | 447  | 533  | 8.58441790549 |
| NM_001193304 | TMEM127 | 367  | 421  | 5.77705625238 |
| NM_001193304 | TMEM127 | 2926 | 3070 | 8.36202548415 |
| NM_012079    | DGAT1   | 1008 | 1060 | 7.82385541409 |
| NM_012079    | DGAT1   | 488  | 544  | 6.82385541409 |
| NM_012079    | DGAT1   | 1362 | 1427 | 6.82385565001 |
| NM_012079    | DGAT1   | 1284 | 1321 | 7.81983804984 |
| NM_012073    | CCT5    | 1384 | 1483 | 3.61665574761 |
| NM_012073    | CCT5    | 1872 | 1999 | 4.03169324689 |
| NM_012073    | CCT5    | 149  | 187  | 2.6166557476  |
| NM_012073    | CCT5    | 1486 | 1871 | 6.03169324689 |
| NM_012073    | CCT5    | 2004 | 2078 | 2.61665574006 |
| NM_012073    | CCT5    | 218  | 561  | 6.07608736625 |
| NM_012073    | CCT5    | 571  | 1377 | 7.53948788709 |
| NM_001195044 | YAP1    | 3023 | 3072 | 4.88633346162 |

|              |        |      |      |               |
|--------------|--------|------|------|---------------|
| NM_001195044 | YAP1   | 2349 | 2412 | 4.89034433074 |
| NM_001195044 | YAP1   | 1108 | 1154 | 3.88633346162 |
| NM_001195044 | YAP1   | 1827 | 1916 | 3.89034433074 |
| NM_001195044 | YAP1   | 544  | 590  | 4.89035106179 |
| NM_001195044 | YAP1   | 2180 | 2223 | 3.88633346162 |
| NM_001195044 | YAP1   | 4430 | 4489 | 3.88633346162 |
| NM_001195044 | YAP1   | 1445 | 1566 | 6.21227915668 |
| NM_001195044 | YAP1   | 4591 | 4639 | 5.4751398122  |
| NM_001195044 | YAP1   | 2650 | 2699 | 5.39117435313 |
| NM_001195044 | YAP1   | 2001 | 2056 | 4.89034433074 |
| NM_001195044 | YAP1   | 750  | 914  | 6.47531356252 |
| NM_001166261 | MTIF3  | 449  | 482  | 4.57913583876 |
| NM_001083538 | POTEE  | 3343 | 3371 | 7.45279923499 |
| NM_001083538 | POTEE  | 3392 | 3439 | 7.45279924254 |
| NM_001083538 | POTEE  | 2708 | 2739 | 9.45279924254 |
| NM_001083538 | POTEE  | 2810 | 2838 | 8.45279900662 |
| NM_001083538 | POTEE  | 3011 | 3076 | 9.45279924254 |
| NM_001083538 | POTEE  | 3288 | 3323 | 9.7747273372  |
| NM_001083538 | POTEE  | 2764 | 2806 | 8.45279924253 |
| NM_001083538 | POTEE  | 2457 | 2552 | 10.622724244  |
| NM_001083538 | POTEE  | 2145 | 2179 | 7.45279923499 |
| NM_001083538 | POTEE  | 3178 | 3244 | 9.77472733742 |
| NM_005147    | DNAJA3 | 2676 | 2716 | 4.57073915377 |
| NM_005147    | DNAJA3 | 753  | 813  | 6.23983413282 |
| NM_005147    | DNAJA3 | 233  | 277  | 4.65086076298 |
| NM_005147    | DNAJA3 | 347  | 392  | 5.65487812723 |
| NM_005147    | DNAJA3 | 1173 | 1253 | 4.65470461283 |
| NM_005147    | DNAJA3 | 2574 | 2624 | 5.6548783556  |
| NM_005147    | DNAJA3 | 1616 | 1736 | 5.6548783556  |
| NM_005147    | DNAJA3 | 2095 | 2177 | 4.65086076298 |
| NM_005147    | DNAJA3 | 883  | 1068 | 6.97680645804 |
| NM_005146    | SART1  | 1840 | 1931 | 5.57841211417 |
| NM_005146    | SART1  | 440  | 505  | 4.57841211417 |
| NM_005146    | SART1  | 1043 | 1089 | 4.49829050496 |
| NM_005146    | SART1  | 672  | 756  | 4.58242298329 |
| NM_005148    | UNC119 | 314  | 409  | 9.07289496313 |
| NM_005148    | UNC119 | 682  | 761  | 9.07289519883 |
| NM_005148    | UNC119 | 241  | 312  | 9.0728951915  |
| NM_001178063 | C2     | 1080 | 1127 | 4.21114786262 |
| NM_001178063 | C2     | 1209 | 1348 | 5.21114786262 |
| NM_001178063 | C2     | 410  | 467  | 1.88904601742 |
| NM_001178063 | C2     | 1829 | 1950 | 4.21114786262 |
| NM_001178063 | C2     | 182  | 259  | 3.47418226846 |
| NM_001178063 | C2     | 1002 | 1073 | 1.88921953182 |
| NM_001178063 | C2     | 1493 | 1567 | 4.69657468979 |
| NM_001178063 | C2     | 268  | 359  | 3.88921976774 |
| NM_001178063 | C2     | 1401 | 1473 | 1.88921976751 |
| NM_001178063 | C2     | 1612 | 1823 | 5.34865138637 |
| NM_001178063 | C2     | 473  | 884  | 6.74720076286 |
| NM_012291    | ESPL1  | 739  | 768  | 8.81883756122 |

|           |        |      |      |               |
|-----------|--------|------|------|---------------|
| NM_012291 | ESPL1  | 843  | 896  | 11.4879392713 |
| NM_012291 | ESPL1  | 6005 | 6068 | 8.90297677059 |
| NM_012291 | ESPL1  | 5913 | 5968 | 9.89895917043 |
| NM_012291 | ESPL1  | 2972 | 3025 | 10.4879392711 |
| NM_012291 | ESPL1  | 3487 | 3565 | 9.9029767706  |
| NM_012291 | ESPL1  | 1863 | 1943 | 9.9029767706  |
| NM_012291 | ESPL1  | 3848 | 3883 | 8.81883756122 |
| NM_012291 | ESPL1  | 3033 | 3064 | 8.81883756122 |
| NM_012291 | ESPL1  | 4371 | 4413 | 8.90280302028 |
| NM_012291 | ESPL1  | 3745 | 3807 | 10.4879392711 |
| NM_012291 | ESPL1  | 3212 | 3272 | 11.2249048655 |
| NM_012291 | ESPL1  | 2821 | 2944 | 9.9029767706  |
| NM_012291 | ESPL1  | 4785 | 4840 | 10.4879392713 |
| NM_012291 | ESPL1  | 6473 | 6544 | 8.90297676305 |
| NM_012291 | ESPL1  | 345  | 430  | 11.4879392713 |
| NM_012291 | ESPL1  | 2481 | 2527 | 8.9029767706  |
| NM_012291 | ESPL1  | 4255 | 4328 | 9.9029767706  |
| NM_012291 | ESPL1  | 227  | 284  | 8.89895917043 |
| NM_012291 | ESPL1  | 5562 | 5601 | 9.81883756122 |
| NM_012291 | ESPL1  | 1491 | 1555 | 9.9029767706  |
| NM_012291 | ESPL1  | 4850 | 4915 | 9.90297003955 |
| NM_012291 | ESPL1  | 5421 | 5511 | 10.4879392713 |
| NM_012291 | ESPL1  | 1969 | 2101 | 9.9029767706  |
| NM_012291 | ESPL1  | 2117 | 2273 | 11.9029767706 |
| NM_012291 | ESPL1  | 4549 | 4640 | 11.7103316927 |
| NM_012291 | ESPL1  | 502  | 578  | 10.4839216711 |
| NM_012291 | ESPL1  | 1265 | 1469 | 13.3624083892 |
| NM_012291 | ESPL1  | 2614 | 2758 | 12.2249048655 |
| NM_012291 | ESPL1  | 300  | 344  | 8.89895917043 |
| NM_012291 | ESPL1  | 3131 | 3210 | 8.90297677038 |
| NM_012291 | ESPL1  | 1122 | 1249 | 10.4879392713 |
| NM_012291 | ESPL1  | 1646 | 1834 | 11.2249048655 |
| NM_012291 | ESPL1  | 4055 | 4126 | 9.90297677059 |
| NM_012291 | ESPL1  | 2285 | 2365 | 8.89895917043 |
| NM_012291 | ESPL1  | 4918 | 5060 | 9.9029767706  |
| NM_012291 | ESPL1  | 101  | 226  | 9.9029767706  |
| NM_012291 | ESPL1  | 6143 | 6323 | 9.9029767706  |
| NM_080861 | SPSB3  | 1143 | 1194 | 6.77202663149 |
| NM_012292 | HMHA1  | 725  | 773  | 7.22144157697 |
| NM_012292 | HMHA1  | 2426 | 2502 | 8.80640407769 |
| NM_012292 | HMHA1  | 821  | 874  | 7.21743070785 |
| NM_012295 | CABIN1 | 4699 | 4746 | 6.52389207276 |
| NM_012295 | CABIN1 | 1921 | 1984 | 6.52371855836 |
| NM_012295 | CABIN1 | 508  | 596  | 6.52389230846 |
| NM_012295 | CABIN1 | 816  | 855  | 6.4397530993  |
| NM_012295 | CABIN1 | 920  | 962  | 6.51987470851 |
| NM_012295 | CABIN1 | 4230 | 4299 | 7.52389230868 |
| NM_012295 | CABIN1 | 2214 | 2310 | 6.52389230846 |
| NM_012295 | CABIN1 | 80   | 233  | 8.84582040357 |
| NM_012295 | CABIN1 | 5908 | 5965 | 6.4397530993  |

|           |         |      |      |               |
|-----------|---------|------|------|---------------|
| NM_012295 | CABIN1  | 2314 | 2473 | 9.1088548094  |
| NM_012295 | CABIN1  | 3070 | 3169 | 7.52389207276 |
| NM_012295 | CABIN1  | 646  | 721  | 6.52389230867 |
| NM_012295 | CABIN1  | 2843 | 2950 | 8.1088548094  |
| NM_012295 | CABIN1  | 3443 | 3540 | 6.52389230867 |
| NM_012295 | CABIN1  | 1770 | 1900 | 8.1088548094  |
| NM_012294 | RAPGEF5 | 3941 | 3998 | 5.57146318154 |
| NM_012294 | RAPGEF5 | 851  | 891  | 6.15642568227 |
| NM_012294 | RAPGEF5 | 394  | 475  | 6.65560239092 |
| NM_012294 | RAPGEF5 | 1239 | 1322 | 6.24056489143 |
| NM_012294 | RAPGEF5 | 245  | 312  | 4.65158479076 |
| NM_012297 | G3BP2   | 1083 | 1158 | 4.19424300989 |
| NM_012297 | G3BP2   | 486  | 547  | 4.77920551061 |
| NM_012297 | G3BP2   | 1027 | 1082 | 3.77920551039 |
| NM_012297 | G3BP2   | 1443 | 1538 | 2.19424300989 |
| NM_012297 | G3BP2   | 2440 | 2498 | 2.19424300234 |
| NM_012297 | G3BP2   | 548  | 681  | 5.19424300989 |
| NM_012297 | G3BP2   | 1184 | 1416 | 6.51617110478 |
| NM_012297 | G3BP2   | 1566 | 1742 | 5.36416801133 |
| NM_012297 | G3BP2   | 726  | 883  | 5.00159793195 |
| NM_012297 | G3BP2   | 2777 | 2855 | 3.19022540972 |
| NM_012297 | G3BP2   | 1754 | 1984 | 5.77920551061 |
| NM_012297 | G3BP2   | 3004 | 3062 | 2.19022540972 |
| NM_012297 | G3BP2   | 218  | 440  | 5.89468272803 |
| NM_001919 | ECI1    | 840  | 895  | 6.27969218906 |
| NM_001919 | ECI1    | 392  | 456  | 5.27969218906 |
| NM_001919 | ECI1    | 170  | 383  | 8.08704711112 |
| NM_001916 | CYC1    | 411  | 475  | 4.86790995352 |
| NM_001916 | CYC1    | 476  | 553  | 6.86790995352 |
| NM_001916 | CYC1    | 553  | 602  | 4.8679097176  |
| NM_001916 | CYC1    | 810  | 854  | 6.45287221832 |
| NM_001916 | CYC1    | 344  | 392  | 5.86790995352 |
| NM_001916 | CYC1    | 854  | 976  | 8.03783495496 |
| NM_001916 | CYC1    | 980  | 1056 | 6.45287245424 |
| NM_001916 | CYC1    | 687  | 746  | 4.86790995352 |
| NM_001916 | CYC1    | 164  | 340  | 8.18983804841 |
| NM_004433 | ELF3    | 1159 | 1203 | 6.22325637272 |
| NM_004433 | ELF3    | 719  | 778  | 7.22343011548 |
| NM_004433 | ELF3    | 1400 | 1438 | 7.545357982   |
| NM_004433 | ELF3    | 910  | 956  | 6.80839262376 |
| NM_004433 | ELF3    | 526  | 599  | 5.22343012303 |
| NM_004433 | ELF3    | 68   | 136  | 6.72425341437 |
| NM_004433 | ELF3    | 1790 | 1849 | 5.13929091365 |
| NM_004433 | ELF3    | 1667 | 1705 | 7.54535148687 |
| NM_004433 | ELF3    | 356  | 483  | 6.80839262376 |
| NM_004433 | ELF3    | 189  | 311  | 8.03078504509 |
| NM_004433 | ELF3    | 778  | 894  | 6.22343012303 |
| NM_004433 | ELF3    | 1048 | 1156 | 5.22343012303 |
| NM_004431 | EPHA2   | 3020 | 3112 | 7.20789614139 |
| NM_004431 | EPHA2   | 3216 | 3313 | 7.62293364067 |

|              |        |      |      |               |
|--------------|--------|------|------|---------------|
| NM_004431    | EPHA2  | 2855 | 2943 | 7.94486173556 |
| NM_004431    | EPHA2  | 1616 | 1669 | 5.62293340475 |
| NM_004431    | EPHA2  | 2952 | 3013 | 6.62293364045 |
| NM_004431    | EPHA2  | 687  | 742  | 6.62293364045 |
| NM_004431    | EPHA2  | 2745 | 2848 | 8.79285864211 |
| NM_004431    | EPHA2  | 975  | 1070 | 7.20789614139 |
| NM_004431    | EPHA2  | 1966 | 2063 | 7.62293364067 |
| NM_004431    | EPHA2  | 3149 | 3206 | 5.62293363312 |
| NM_004431    | EPHA2  | 747  | 857  | 7.20789614139 |
| NM_004431    | EPHA2  | 2500 | 2630 | 9.08236525931 |
| NM_004431    | EPHA2  | 191  | 679  | 10.66732776   |
| NM_004431    | EPHA2  | 3486 | 3955 | 9.71039648192 |
| NM_004431    | EPHA2  | 1708 | 1964 | 9.71039648192 |
| NM_004431    | EPHA2  | 2636 | 2726 | 5.62293364067 |
| NM_004431    | EPHA2  | 1164 | 1389 | 8.94486173556 |
| NM_004431    | EPHA2  | 2334 | 2482 | 7.94486173556 |
| NM_004431    | EPHA2  | 2210 | 2313 | 7.94486173556 |
| NM_001195307 | BBIP1  | 356  | 401  | 4.24220233903 |
| NM_001195307 | BBIP1  | 1115 | 1152 | 4.23835848918 |
| NM_201442    | C1S    | 2019 | 2083 | 9.7733766642  |
| NM_201442    | C1S    | 1159 | 1236 | 9.35833916492 |
| NM_201442    | C1S    | 760  | 807  | 10.0953047589 |
| NM_201442    | C1S    | 1074 | 1135 | 8.7733766642  |
| NM_201442    | C1S    | 832  | 886  | 7.76935906403 |
| NM_201442    | C1S    | 510  | 579  | 10.5807315863 |
| NM_201442    | C1S    | 461  | 504  | 8.77320291389 |
| NM_201442    | C1S    | 2083 | 2149 | 9.7733766642  |
| NM_201442    | C1S    | 579  | 628  | 7.7733766642  |
| NM_201442    | C1S    | 999  | 1071 | 8.7733766642  |
| NM_201442    | C1S    | 1375 | 1474 | 10.3583391649 |
| NM_201442    | C1S    | 1704 | 1813 | 10.7733766642 |
| NM_201442    | C1S    | 1891 | 1976 | 10.5807315863 |
| NM_201442    | C1S    | 1293 | 1372 | 10.0953047591 |
| NM_201442    | C1S    | 2464 | 2607 | 11.5807315863 |
| NM_201442    | C1S    | 2333 | 2443 | 8.7733766642  |
| NM_201442    | C1S    | 1546 | 1667 | 10.0953047591 |
| NM_201442    | C1S    | 660  | 745  | 9.35833916492 |
| NM_201442    | C1S    | 348  | 411  | 9.77337642829 |
| NM_201442    | C1S    | 2171 | 2318 | 9.35833916492 |
| NM_201440    | PPHLN1 | 889  | 947  | 6.36213294347 |
| NM_201440    | PPHLN1 | 465  | 517  | 4.69303123336 |
| NM_201440    | PPHLN1 | 134  | 190  | 6.7771704352  |
| NM_201440    | PPHLN1 | 981  | 1047 | 5.77699669243 |
| NM_201440    | PPHLN1 | 363  | 401  | 5.77699669243 |
| NM_201440    | PPHLN1 | 226  | 312  | 6.36213294347 |
| NM_201440    | PPHLN1 | 678  | 802  | 6.77717044275 |
| NM_201440    | PPHLN1 | 1236 | 1302 | 4.77716371169 |
| NM_201441    | TEAD4  | 1305 | 1358 | 5.57794124992 |
| NM_201441    | TEAD4  | 830  | 872  | 5.49380877159 |
| NM_201441    | TEAD4  | 1578 | 1635 | 6.5739303808  |

|              |        |      |      |               |
|--------------|--------|------|------|---------------|
| NM_000532    | PCCB   | 1680 | 1744 | 5.63335048653 |
| NM_000532    | PCCB   | 1460 | 1523 | 5.63719433638 |
| NM_000532    | PCCB   | 918  | 980  | 7.55322887732 |
| NM_000532    | PCCB   | 684  | 797  | 7.22233058742 |
| NM_000532    | PCCB   | 1071 | 1202 | 7.22233058742 |
| NM_000532    | PCCB   | 830  | 914  | 5.55322887732 |
| NM_006948    | HSPA13 | 431  | 484  | 5.77602557739 |
| NM_006948    | HSPA13 | 1462 | 1548 | 6.94595057883 |
| NM_006948    | HSPA13 | 367  | 428  | 5.3609880781  |
| NM_006948    | HSPA13 | 47   | 145  | 6.36098807811 |
| NM_006948    | HSPA13 | 150  | 220  | 6.36098807811 |
| NM_006948    | HSPA13 | 2169 | 2239 | 4.77602557739 |
| NM_006948    | HSPA13 | 1625 | 1691 | 6.36098807811 |
| NM_006948    | HSPA13 | 276  | 336  | 6.09795367205 |
| NM_006948    | HSPA13 | 495  | 551  | 4.77602557739 |
| NM_006948    | HSPA13 | 706  | 866  | 8.02395309083 |
| NM_006948    | HSPA13 | 574  | 681  | 6.94595057883 |
| NM_006948    | HSPA13 | 1079 | 1237 | 7.682916173   |
| NM_006948    | HSPA13 | 1246 | 1412 | 6.94595057883 |
| NM_006948    | HSPA13 | 866  | 1073 | 6.58338049945 |
| NM_006949    | STXBP2 | 774  | 864  | 7.02051205677 |
| NM_006949    | STXBP2 | 1410 | 1482 | 5.43153195588 |
| NM_006949    | STXBP2 | 1483 | 1540 | 5.43153195588 |
| NM_006949    | STXBP2 | 878  | 917  | 5.35141034667 |
| NM_006949    | STXBP2 | 310  | 382  | 6.43537580573 |
| NM_006949    | STXBP2 | 957  | 1038 | 5.4355495485  |
| NM_001008495 | TMEM64 | 820  | 858  | 8.86161404064 |
| NM_001008495 | TMEM64 | 478  | 550  | 9.45059414131 |
| NM_006946    | SPTBN2 | 1151 | 1187 | 11.3851999375 |
| NM_006946    | SPTBN2 | 4992 | 5070 | 11.3851999448 |
| NM_006946    | SPTBN2 | 6185 | 6235 | 10.385199945  |
| NM_006946    | SPTBN2 | 5745 | 5796 | 10.3850261947 |
| NM_006946    | SPTBN2 | 5537 | 5613 | 11.385199945  |
| NM_006946    | SPTBN2 | 1970 | 2052 | 11.385199945  |
| NM_006946    | SPTBN2 | 5216 | 5296 | 11.3851999448 |
| NM_006946    | SPTBN2 | 7321 | 7363 | 11.3811823449 |
| NM_006946    | SPTBN2 | 7416 | 7487 | 11.385199945  |
| NM_006946    | SPTBN2 | 6778 | 6841 | 12.7071280399 |
| NM_006946    | SPTBN2 | 3595 | 3641 | 10.385199945  |
| NM_006946    | SPTBN2 | 1413 | 1460 | 12.385199945  |
| NM_006946    | SPTBN2 | 1561 | 1626 | 11.9701624455 |
| NM_006946    | SPTBN2 | 3663 | 3703 | 11.385193214  |
| NM_006946    | SPTBN2 | 6254 | 6305 | 10.3010607357 |
| NM_006946    | SPTBN2 | 4894 | 4953 | 11.3851999375 |
| NM_006946    | SPTBN2 | 2642 | 2691 | 11.9701624458 |
| NM_006946    | SPTBN2 | 1221 | 1313 | 10.385199945  |
| NM_006946    | SPTBN2 | 6043 | 6153 | 12.9701624458 |
| NM_006946    | SPTBN2 | 3901 | 3994 | 11.9701624458 |
| NM_006946    | SPTBN2 | 2728 | 2832 | 11.9701624458 |
| NM_006946    | SPTBN2 | 6504 | 6581 | 11.3850261947 |

|              |        |      |      |                |
|--------------|--------|------|------|----------------|
| NM_006946    | SPTBN2 | 4352 | 4393 | 10.3811823449  |
| NM_006946    | SPTBN2 | 1672 | 1758 | 11.9701624458  |
| NM_006946    | SPTBN2 | 4748 | 4892 | 10.385199945   |
| NM_006946    | SPTBN2 | 4559 | 4591 | 10.3811823449  |
| NM_006946    | SPTBN2 | 6404 | 6462 | 11.385199945   |
| NM_006946    | SPTBN2 | 622  | 877  | 14.4726627863  |
| NM_006946    | SPTBN2 | 2384 | 2512 | 11.9701624458  |
| NM_006946    | SPTBN2 | 85   | 248  | 13.1925548671  |
| NM_006946    | SPTBN2 | 3262 | 3356 | 11.385199945   |
| NM_006946    | SPTBN2 | 3705 | 3772 | 11.9701624458  |
| NM_006946    | SPTBN2 | 4012 | 4178 | 12.7071280399  |
| NM_006946    | SPTBN2 | 904  | 1090 | 12.7071280399  |
| NM_006946    | SPTBN2 | 4210 | 4325 | 12.385199945   |
| NM_006946    | SPTBN2 | 474  | 593  | 12.385199945   |
| NM_006946    | SPTBN2 | 293  | 354  | 10.3811823449  |
| NM_006946    | SPTBN2 | 5797 | 6006 | 12.9701624458  |
| NM_006946    | SPTBN2 | 3494 | 3582 | 12.385199945   |
| NM_006946    | SPTBN2 | 6957 | 7028 | 11.385199945   |
| NM_006946    | SPTBN2 | 2854 | 3026 | 12.7071280399  |
| NM_006947    | SRP72  | 1498 | 1578 | 4.67415422806  |
| NM_006947    | SRP72  | 1849 | 1927 | 5.25911672879  |
| NM_006947    | SRP72  | 1027 | 1094 | 5.67415422806  |
| NM_006947    | SRP72  | 630  | 720  | 5.25911672878  |
| NM_006947    | SRP72  | 1651 | 1718 | 4.67415422806  |
| NM_006947    | SRP72  | 2296 | 2345 | 6.25911672878  |
| NM_006947    | SRP72  | 1756 | 1805 | 4.67415422784  |
| NM_006947    | SRP72  | 47   | 115  | 5.67415422806  |
| NM_006947    | SRP72  | 1403 | 1473 | 4.67415422806  |
| NM_006947    | SRP72  | 587  | 623  | 4.67013662789  |
| NM_006947    | SRP72  | 116  | 184  | 5.25911672879  |
| NM_006947    | SRP72  | 363  | 463  | 6.84407922951  |
| NM_006947    | SRP72  | 2040 | 2120 | 5.25509912861  |
| NM_006947    | SRP72  | 3224 | 3304 | 6.25911672879  |
| NM_006947    | SRP72  | 1581 | 1644 | 5.67415422784  |
| NM_006947    | SRP72  | 205  | 363  | 6.48150915012  |
| NM_006947    | SRP72  | 2836 | 2924 | 5.67415422806  |
| NM_001008491 | SEPT2  | 2564 | 2641 | 2.97243646905  |
| NM_001008491 | SEPT2  | 974  | 1046 | 3.65050837417  |
| NM_001008491 | SEPT2  | 2903 | 2934 | 0.566369164782 |
| NM_001008491 | SEPT2  | 757  | 821  | 1.65050837417  |
| NM_001008491 | SEPT2  | 3080 | 3115 | 1.56636916478  |
| NM_001008491 | SEPT2  | 2102 | 2139 | 2.972429738    |
| NM_001008491 | SEPT2  | 1209 | 1262 | 1.65050836662  |
| NM_001008491 | SEPT2  | 1593 | 1631 | 0.650334623848 |
| NM_001008491 | SEPT2  | 3509 | 3639 | 3.23547087489  |
| NM_001008491 | SEPT2  | 2681 | 2743 | 2.23145327471  |
| NM_001008491 | SEPT2  | 2157 | 2223 | 3.97243646905  |
| NM_001008491 | SEPT2  | 3229 | 3278 | 2.65050836662  |
| NM_001008491 | SEPT2  | 581  | 628  | 1.56636916478  |
| NM_001008491 | SEPT2  | 2507 | 2557 | 0.650508366616 |



|              |       |       |       |                |
|--------------|-------|-------|-------|----------------|
| NM_001008491 | SEPT2 | 2290  | 2324  | 0.646490773993 |
| NM_001008491 | SEPT2 | 2024  | 2089  | 0.650508374166 |
| NM_001008491 | SEPT2 | 1312  | 1387  | 2.23547087489  |
| NM_001008491 | SEPT2 | 642   | 757   | 3.82043337561  |
| NM_001008491 | SEPT2 | 2769  | 2884  | 2.97243646905  |
| NM_001008491 | SEPT2 | 904   | 961   | 2.65050837417  |
| NM_001008491 | SEPT2 | 3122  | 3184  | 0.650501643112 |
| NM_001008491 | SEPT2 | 2333  | 2376  | 0.646490773993 |
| NM_001008491 | SEPT2 | 2942  | 3013  | 2.65050837417  |
| NM_001008491 | SEPT2 | 1745  | 2018  | 5.45786329622  |
| NM_001008491 | SEPT2 | 1070  | 1173  | 2.97243646905  |
| NM_001008491 | SEPT2 | 1394  | 1542  | 2.97243646905  |
| NM_001008491 | SEPT2 | 2424  | 2491  | 2.97243646905  |
| NM_020803    | KLHL8 | 2160  | 2234  | 6.0030638034   |
| NM_020806    | GPHN  | 3040  | 3087  | 7.02170947238  |
| NM_020806    | GPHN  | 2925  | 2987  | 6.02170947238  |
| NM_001620    | AHNAK | 18211 | 18280 | 6.85295435897  |
| NM_001620    | AHNAK | 14079 | 14141 | 6.85295435897  |
| NM_001620    | AHNAK | 10672 | 10733 | 5.26398098913  |
| NM_001620    | AHNAK | 6538  | 6586  | 7.26799185825  |
| NM_001620    | AHNAK | 6765  | 6809  | 6.26782483898  |
| NM_001620    | AHNAK | 6170  | 6219  | 6.26782483898  |
| NM_001620    | AHNAK | 5295  | 5361  | 6.26799185825  |
| NM_001620    | AHNAK | 5980  | 6018  | 6.18385937992  |
| NM_001620    | AHNAK | 8339  | 8367  | 5.26398098913  |
| NM_001620    | AHNAK | 7803  | 7870  | 5.18385937992  |
| NM_001620    | AHNAK | 6303  | 6369  | 6.84894348985  |
| NM_001620    | AHNAK | 7112  | 7170  | 7.26782483898  |
| NM_001620    | AHNAK | 7213  | 7270  | 5.26782483898  |
| NM_001620    | AHNAK | 9624  | 9680  | 6.26398098913  |
| NM_001621    | AHR   | 1516  | 1578  | 7.89891899384  |
| NM_001621    | AHR   | 3182  | 3267  | 8.31395649312  |
| NM_001621    | AHR   | 1874  | 2005  | 9.31395649312  |
| NM_001621    | AHR   | 1723  | 1798  | 7.31395649312  |
| NM_001621    | AHR   | 3357  | 3401  | 6.31394976206  |
| NM_001621    | AHR   | 3401  | 3475  | 6.31395649312  |
| NM_001621    | AHR   | 302   | 352   | 6.89874524352  |
| NM_001621    | AHR   | 2809  | 2861  | 5.31395649311  |
| NM_001621    | AHR   | 5452  | 5559  | 8.63588458801  |
| NM_001621    | AHR   | 3695  | 3748  | 6.31394976206  |
| NM_001621    | AHR   | 5355  | 5421  | 5.3137827428   |
| NM_001621    | AHR   | 1822  | 1861  | 7.63588458801  |
| NM_001621    | AHR   | 3504  | 3570  | 6.89891899384  |
| NM_001621    | AHR   | 960   | 1067  | 9.12131141518  |
| NM_001621    | AHR   | 235   | 276   | 6.30993889295  |
| NM_001621    | AHR   | 4074  | 4177  | 7.89891899384  |
| NM_001621    | AHR   | 2375  | 2481  | 8.77338811176  |
| NM_001621    | AHR   | 5653  | 5755  | 6.89891899384  |
| NM_001621    | AHR   | 2492  | 2541  | 6.3137827428   |
| NM_001621    | AHR   | 2555  | 2600  | 6.31395648557  |

|           |         |      |      |               |
|-----------|---------|------|------|---------------|
| NM_001621 | AHR     | 1584 | 1701 | 8.63588458801 |
| NM_001621 | AHR     | 3064 | 3161 | 7.63588458801 |
| NM_001621 | AHR     | 2006 | 2150 | 9.12131141518 |
| NM_001621 | AHR     | 13   | 111  | 6.3139564929  |
| NM_001621 | AHR     | 2868 | 2951 | 6.89891899384 |
| NM_001621 | AHR     | 4228 | 4443 | 8.12131141518 |
| NM_001621 | AHR     | 2150 | 2375 | 9.40141933437 |
| NM_001621 | AHR     | 3827 | 3911 | 6.31395649312 |
| NM_001621 | AHR     | 5878 | 5997 | 5.31394976206 |
| NM_001621 | AHR     | 1218 | 1506 | 9.89891899384 |
| NM_001621 | AHR     | 4479 | 4572 | 7.63588458778 |
| NM_001621 | AHR     | 2639 | 2798 | 7.89891899384 |
| NM_001621 | AHR     | 717  | 943  | 9.56188400656 |
| NM_001621 | AHR     | 1067 | 1204 | 8.31395649312 |
| NM_020753 | CASKIN2 | 1317 | 1372 | 8.24515367845 |
| NM_020753 | CASKIN2 | 671  | 746  | 10.5670885044 |
| NM_020755 | SERINC1 | 2771 | 2811 | 2.76472644347 |
| NM_020755 | SERINC1 | 2620 | 2699 | 4.35370654436 |
| NM_020755 | SERINC1 | 2992 | 3111 | 5.93866904508 |
| NM_020755 | SERINC1 | 2410 | 2462 | 4.35370654436 |
| NM_020755 | SERINC1 | 0    | 474  | 9.55010375717 |
| NM_020755 | SERINC1 | 1783 | 1878 | 5.35370654436 |
| NM_020755 | SERINC1 | 2886 | 2987 | 5.93866904508 |
| NM_020755 | SERINC1 | 871  | 979  | 5.5760989657  |
| NM_020755 | SERINC1 | 1899 | 2072 | 5.35370654436 |
| NM_020755 | SERINC1 | 477  | 868  | 9.17813497978 |
| NM_020755 | SERINC1 | 1494 | 1770 | 7.35370654436 |
| NM_020755 | SERINC1 | 992  | 1485 | 9.53692836842 |
| NM_020755 | SERINC1 | 2089 | 2209 | 4.35370654436 |
| NM_020755 | SERINC1 | 2546 | 2616 | 3.76874380772 |
| NM_020755 | SERINC1 | 2264 | 2340 | 4.76874404342 |
| NM_001625 | AK2     | 573  | 636  | 4.92511417147 |
| NM_001625 | AK2     | 444  | 506  | 6.24704226614 |
| NM_001625 | AK2     | 917  | 969  | 4.9210965713  |
| NM_001625 | AK2     | 180  | 422  | 7.73246909354 |
| NM_020205 | OTUD7B  | 2266 | 2319 | 7.70548045188 |
| NM_020205 | OTUD7B  | 5452 | 5527 | 8.70565396628 |
| NM_020205 | OTUD7B  | 955  | 1020 | 10.0275822971 |
| NM_020205 | OTUD7B  | 744  | 789  | 9.20647749353 |
| NM_020205 | OTUD7B  | 2936 | 3010 | 9.28659910274 |
| NM_020205 | OTUD7B  | 1179 | 1266 | 9.70565419465 |
| NM_020205 | OTUD7B  | 297  | 408  | 8.7056542022  |
| NM_054027 | ANKH    | 2212 | 2267 | 7.63002595132 |
| NM_054027 | ANKH    | 1723 | 1801 | 7.62985893205 |
| NM_054027 | ANKH    | 1192 | 1252 | 9.21499518309 |
| NM_054027 | ANKH    | 1591 | 1637 | 7.63002595132 |
| NM_054027 | ANKH    | 329  | 378  | 6.63003244645 |
| NM_054027 | ANKH    | 2520 | 2581 | 6.62985893205 |
| NM_054027 | ANKH    | 2106 | 2181 | 7.63003267482 |
| NM_054027 | ANKH    | 1856 | 1904 | 8.13085597371 |

|              |          |      |      |                    |
|--------------|----------|------|------|--------------------|
| NM_054027    | ANKH     | 1258 | 1365 | 8.21499518287      |
| NM_054027    | ANKH     | 1510 | 1587 | 8.63003267482      |
| NM_054027    | ANKH     | 1365 | 1464 | 9.43738760443      |
| NM_054027    | ANKH     | 110  | 144  | 6.54589347298      |
| NM_054027    | ANKH     | 664  | 787  | 9.43738760443      |
| NM_020759    | STARD9   | 977  | 1004 | 8.48760927638      |
| NM_032859    | ABHD13   | 319  | 365  | 9.56145863096      |
| NM_032859    | ABHD13   | 758  | 826  | 9.56145863096      |
| NM_032859    | ABHD13   | 537  | 607  | 9.14642113169      |
| NM_032859    | ABHD13   | 255  | 300  | 7.56128488065      |
| NM_032859    | ABHD13   | 995  | 1181 | 10.561458631       |
| NM_032857    | LACTB    | 1064 | 1190 | 5.88185208519      |
| NM_032857    | LACTB    | 444  | 530  | 5.29688958447      |
| NM_032857    | LACTB    | 1250 | 1387 | 6.61881767935      |
| NM_198275    | MPZL3    | 260  | 305  | 8.86171121472      |
| NM_198275    | MPZL3    | 939  | 1024 | 9.86572880734      |
| NM_198275    | MPZL3    | 2916 | 3005 | 9.86572857897      |
| NM_198275    | MPZL3    | 1062 | 1133 | 9.86572880734      |
| NM_032853    | MUM1     | 2460 | 2531 | 7.58318692364      |
| NM_032853    | MUM1     | 2573 | 2629 | 7.58319341878      |
| NM_032853    | MUM1     | 2944 | 3000 | 6.57917605452      |
| NM_032853    | MUM1     | 3986 | 4076 | 8.16815615542      |
| NM_032853    | MUM1     | 1929 | 2000 | 7.57917605452      |
| NM_032853    | MUM1     | 3286 | 3324 | 6.57917605452      |
| NM_032853    | MUM1     | 3627 | 3692 | 7.58318692364      |
| NM_032853    | MUM1     | 1507 | 1564 | 8.16413855525      |
| NM_032853    | MUM1     | 429  | 475  | 6.49905444531      |
| NM_032853    | MUM1     | 2054 | 2171 | 6.5831936547       |
| NM_032853    | MUM1     | 2659 | 2763 | 8.58319364715      |
| NM_018442    | DCAF6    | 3126 | 3192 | 6.47177856235      |
| NM_018442    | DCAF6    | 1139 | 1239 | 5.88680956649      |
| NM_018442    | DCAF6    | 759  | 816  | 5.88681629755      |
| NM_018442    | DCAF6    | 865  | 932  | 6.47160504795      |
| NM_018442    | DCAF6    | 2416 | 2465 | 4.80267708816      |
| NM_018442    | DCAF6    | 513  | 576  | 5.88664254723      |
| NM_018442    | DCAF6    | 1277 | 1360 | 6.47177879805      |
| NM_001080843 | GSTT2B   | 341  | 396  | 10.6200646308      |
| NM_001080843 | GSTT2B   | 239  | 333  | 9.62023838107      |
| NM_001145301 | RARA     | 679  | 732  | 5.12576604423      |
| NM_001145301 | RARA     | 1239 | 1342 | 7.12575932072      |
| NM_017875    | SLC25A38 |      | 578  | 631 6.16445055833  |
| NM_017875    | SLC25A38 |      | 1178 | 1215 5.16445055833 |
| NM_017875    | SLC25A38 |      | 399  | 458 5.1684681585   |
| NM_017875    | SLC25A38 |      | 641  | 737 6.75343065923  |
| NM_001008726 | WDR89    | 305  | 371  | 8.28021990952      |
| NM_001040284 | PAPD5    | 3922 | 3974 | 6.37040582087      |
| NM_001040284 | PAPD5    | 1687 | 1766 | 7.45454479433      |
| NM_018117    | WDR11    | 2631 | 2693 | 6.99135320758      |
| NM_001143973 | TCTN3    | 1193 | 1285 | 6.08304777372      |
| NM_001143973 | TCTN3    | 728  | 841  | 8.40899346878      |

|              |         |      |      |               |
|--------------|---------|------|------|---------------|
| NM_001143973 | TCTN3   | 1300 | 1340 | 7.08304777372 |
| NM_001143973 | TCTN3   | 1022 | 1071 | 7.08706513797 |
| NM_001143973 | TCTN3   | 953  | 995  | 6.00292616451 |
| NM_001143973 | TCTN3   | 1384 | 1442 | 7.08706513797 |
| NM_001143973 | TCTN3   | 1655 | 1748 | 7.66801027444 |
| NM_001143973 | TCTN3   | 435  | 605  | 9.08706537389 |
| NM_018112    | TMEM38B | 1963 | 2033 | 8.99927221703 |
| NM_018112    | TMEM38B | 781  | 899  | 10.8737413349 |
| NM_018112    | TMEM38B | 991  | 1038 | 8.99927220948 |
| NM_018112    | TMEM38B | 1078 | 1145 | 8.99927221703 |
| NM_018112    | TMEM38B | 924  | 965  | 8.91513300764 |
| NM_018112    | TMEM38B | 1149 | 1275 | 9.99927221703 |
| NM_018112    | TMEM38B | 448  | 522  | 10.4143097163 |
| NM_018112    | TMEM38B | 322  | 405  | 9.41430971631 |
| NM_018112    | TMEM38B | 554  | 684  | 10.7362378112 |
| NM_025181    | SLC35F5 | 879  | 1008 | 8.71806959352 |
| NM_025181    | SLC35F5 | 1063 | 1135 | 4.81117226685 |
| NM_025181    | SLC35F5 | 1685 | 1735 | 6.80716139774 |
| NM_025181    | SLC35F5 | 3568 | 3631 | 4.80716139774 |
| NM_025181    | SLC35F5 | 200  | 240  | 4.72703978852 |
| NM_025181    | SLC35F5 | 4091 | 4148 | 4.81100524759 |
| NM_025181    | SLC35F5 | 1762 | 1939 | 8.51161871605 |
| NM_025181    | SLC35F5 | 2243 | 2311 | 5.72703978852 |
| NM_025181    | SLC35F5 | 1610 | 1681 | 6.81117899769 |
| NM_025181    | SLC35F5 | 447  | 707  | 9.33474095397 |
| NM_025181    | SLC35F5 | 1959 | 2112 | 7.98110399935 |
| NM_025181    | SLC35F5 | 1219 | 1300 | 8.51161871605 |
| NM_025181    | SLC35F5 | 1487 | 1606 | 8.1331070928  |
| NM_025181    | SLC35F5 | 749  | 871  | 8.1331070928  |
| NM_024112    | C9orf16 | 479  | 521  | 8.26077315995 |
| NM_181491    | MED22   | 2258 | 2368 | 9.82170131693 |
| NM_181491    | MED22   | 2996 | 3104 | 9.82170131693 |
| NM_181492    | TCF20   | 826  | 877  | 7.57281693028 |
| NM_181492    | TCF20   | 5776 | 5847 | 6.48885147122 |
| NM_181492    | TCF20   | 660  | 710  | 7.56897308043 |
| NM_181492    | TCF20   | 1154 | 1204 | 8.15795318132 |
| NM_181492    | TCF20   | 4928 | 5008 | 6.5729906806  |
| NM_181492    | TCF20   | 5092 | 5137 | 6.56897308043 |
| NM_181492    | TCF20   | 4557 | 4614 | 6.48885147122 |
| NM_181492    | TCF20   | 2611 | 2691 | 8.57299044468 |
| NM_181492    | TCF20   | 1514 | 1601 | 6.56897308043 |
| NM_181492    | TCF20   | 185  | 314  | 6.57299068059 |
| NM_007165    | SF3A2   | 59   | 110  | 7.30720550372 |
| NM_007165    | SF3A2   | 216  | 334  | 8.47713723621 |
| NM_007165    | SF3A2   | 669  | 731  | 6.89217473549 |
| NM_007165    | SF3A2   | 422  | 624  | 8.47713723621 |
| NM_007165    | SF3A2   | 795  | 936  | 6.89217473549 |
| NM_007165    | SF3A2   | 1464 | 1535 | 5.30703848445 |
| NM_000398    | CYB5R3  | 299  | 432  | 7.32494425751 |
| NM_000398    | CYB5R3  | 95   | 175  | 7.06190985168 |

|           |        |      |      |               |
|-----------|--------|------|------|---------------|
| NM_000398 | CYB5R3 | 184  | 230  | 3.73596415662 |
| NM_000398 | CYB5R3 | 1035 | 1099 | 3.65584254741 |
| NM_000398 | CYB5R3 | 1242 | 1273 | 3.73596415662 |
| NM_000398 | CYB5R3 | 655  | 823  | 7.6468723524  |
| NM_000398 | CYB5R3 | 1699 | 1906 | 7.82744459804 |
| NM_000398 | CYB5R3 | 883  | 1003 | 5.73998175679 |
| NM_000398 | CYB5R3 | 1112 | 1166 | 5.32494424996 |
| NM_000398 | CYB5R3 | 440  | 646  | 6.90990675823 |
| NM_000398 | CYB5R3 | 2368 | 2454 | 3.73998175679 |
| NM_000393 | COL5A2 | 969  | 1023 | 11.5079953806 |
| NM_000392 | ABCC2  | 4882 | 4932 | 3.69226941126 |
| NM_000392 | ABCC2  | 5311 | 5373 | 4.27723191198 |
| NM_000392 | ABCC2  | 3753 | 3821 | 3.69226941126 |
| NM_000392 | ABCC2  | 1491 | 1563 | 5.27723191198 |
| NM_000392 | ABCC2  | 5041 | 5105 | 2.69226941104 |
| NM_000392 | ABCC2  | 4076 | 4131 | 2.69226917534 |
| NM_000392 | ABCC2  | 1411 | 1463 | 5.01419727023 |
| NM_000392 | ABCC2  | 494  | 547  | 3.69226941126 |
| NM_000392 | ABCC2  | 1583 | 1667 | 5.27723191198 |
| NM_000392 | ABCC2  | 564  | 598  | 3.68825181109 |
| NM_000392 | ABCC2  | 385  | 484  | 2.69226941126 |
| NM_000392 | ABCC2  | 616  | 801  | 7.21583136732 |
| NM_000392 | ABCC2  | 4968 | 5030 | 2.69226941126 |
| NM_000392 | ABCC2  | 1132 | 1246 | 5.49962433332 |
| NM_000392 | ABCC2  | 3579 | 3719 | 6.1517010299  |
| NM_000392 | ABCC2  | 4768 | 4874 | 5.01419750615 |
| NM_000392 | ABCC2  | 2063 | 2161 | 5.27723191198 |
| NM_000392 | ABCC2  | 4495 | 4596 | 4.27723191198 |
| NM_000392 | ABCC2  | 1246 | 1410 | 5.69226941126 |
| NM_000392 | ABCC2  | 2959 | 3136 | 6.27723191198 |
| NM_000392 | ABCC2  | 4156 | 4288 | 5.27723191198 |
| NM_000392 | ABCC2  | 3831 | 3926 | 5.49962433332 |
| NM_000392 | ABCC2  | 3156 | 3395 | 6.77973225251 |
| NM_000392 | ABCC2  | 1788 | 1956 | 5.69226941126 |
| NM_000392 | ABCC2  | 3403 | 3568 | 5.49962433332 |
| NM_000392 | ABCC2  | 4616 | 4713 | 2.69226941126 |
| NM_000392 | ABCC2  | 4294 | 4481 | 5.69226941126 |
| NM_000392 | ABCC2  | 3928 | 4074 | 5.49962433332 |
| NM_000392 | ABCC2  | 2603 | 2951 | 7.1517010299  |
| NM_000392 | ABCC2  | 1670 | 1787 | 5.49962433332 |
| NM_000392 | ABCC2  | 5150 | 5306 | 5.8621944127  |
| NM_000392 | ABCC2  | 2406 | 2515 | 2.69226941126 |
| NM_000392 | ABCC2  | 220  | 379  | 5.49962433332 |
| NM_000391 | TPP1   | 3143 | 3181 | 7.02103453769 |
| NM_000391 | TPP1   | 1066 | 1123 | 6.43624578729 |
| NM_000391 | TPP1   | 610  | 679  | 6.43624578729 |
| NM_000391 | TPP1   | 3015 | 3087 | 6.43624578729 |
| NM_000391 | TPP1   | 1016 | 1064 | 7.75817388217 |
| NM_000391 | TPP1   | 2227 | 2293 | 7.43624578729 |
| NM_000391 | TPP1   | 556  | 588  | 7.02103453769 |

|              |           |      |      |                 |               |
|--------------|-----------|------|------|-----------------|---------------|
| NM_000391    | TPP1      | 2950 | 3011 | 7.02120828046   |               |
| NM_000391    | TPP1      | 1457 | 1507 | 5.43623905623   |               |
| NM_000391    | TPP1      | 3387 | 3461 | 7.02120805209   |               |
| NM_000391    | TPP1      | 2439 | 2506 | 7.02120805209   |               |
| NM_000391    | TPP1      | 2295 | 2402 | 7.75817388217   |               |
| NM_000391    | TPP1      | 2018 | 2161 | 8.75817388217   |               |
| NM_000391    | TPP1      | 756  | 867  | 8.43624578729   |               |
| NM_000391    | TPP1      | 3087 | 3123 | 5.43222818711   |               |
| NM_000391    | TPP1      | 679  | 739  | 6.43624578706   |               |
| NM_000391    | TPP1      | 1803 | 1927 | 8.02120828801   |               |
| NM_000391    | TPP1      | 389  | 519  | 8.75817388217   |               |
| NM_000391    | TPP1      | 1393 | 1451 | 5.43623905623   |               |
| NM_000391    | TPP1      | 1565 | 1798 | 8.02120828801   |               |
| NM_000391    | TPP1      | 3182 | 3313 | 7.75817388217   |               |
| NM_000391    | TPP1      | 147  | 351  | 8.89567740592   |               |
| NM_000391    | TPP1      | 1258 | 1380 | 8.02120828801   |               |
| NM_000976    | RPL12     | 571  | 617  | 0.202641043867  |               |
| NM_000976    | RPL12     | 336  | 407  | -0.797359184502 |               |
| NM_000976    | RPL12     | 115  | 169  | -0.801376548756 |               |
| NM_000976    | RPL12     | 199  | 331  | 2.20264105142   |               |
| NM_000976    | RPL12     | 414  | 570  | 2.5245691463    |               |
| NM_203355    | CTAGE5    | 2075 | 2148 | 4.69189224892   |               |
| NM_203355    | CTAGE5    | 905  | 988  | 4.10692974819   |               |
| NM_203355    | CTAGE5    | 2883 | 2974 | 4.91428467025   |               |
| NM_203355    | CTAGE5    | 446  | 605  | 5.42885784308   |               |
| NM_203355    | CTAGE5    | 1934 | 2038 | 4.91428467025   |               |
| NM_203355    | CTAGE5    | 1108 | 1250 | 4.91428467025   |               |
| NM_203355    | CTAGE5    | 1807 | 1857 | 3.60775303953   |               |
| NM_203355    | CTAGE5    | 730  | 892  | 4.42885784308   |               |
| NM_203355    | CTAGE5    | 1542 | 1699 | 3.69189224892   |               |
| NM_003840    | TNFRSF10D |      | 1836 | 1904            | 4.93621531032 |
| NM_003840    | TNFRSF10D |      | 2901 | 2994            | 4.93621531032 |
| NM_003840    | TNFRSF10D |      | 1635 | 1686            | 4.93604156001 |
| NM_003840    | TNFRSF10D |      | 755  | 819             | 6.25814340521 |
| NM_003840    | TNFRSF10D |      | 3013 | 3077            | 4.93621531032 |
| NM_003840    | TNFRSF10D |      | 470  | 594             | 5.52117781105 |
| NM_003840    | TNFRSF10D |      | 336  | 409             | 4.93621507441 |
| NM_003840    | TNFRSF10D |      | 3120 | 3198            | 5.52117107999 |
| NM_003840    | TNFRSF10D |      | 2392 | 2496            | 5.52117781105 |
| NM_003840    | TNFRSF10D |      | 15   | 123             | 5.52117781105 |
| NM_003840    | TNFRSF10D |      | 829  | 891             | 3.9362153101  |
| NM_003840    | TNFRSF10D |      | 164  | 311             | 5.93621531032 |
| NM_003840    | TNFRSF10D |      | 1058 | 1286            | 7.93621531032 |
| NM_003840    | TNFRSF10D |      | 892  | 1035            | 5.52117781105 |
| NM_003840    | TNFRSF10D |      | 1372 | 1556            | 6.93621531032 |
| NM_001167604 | XPNPEP1   | 1235 | 1315 | 8.34815554727   |               |
| NM_001167604 | XPNPEP1   | 1370 | 1423 | 6.34814881621   |               |
| NM_001167604 | XPNPEP1   | 381  | 435  | 6.26401633788   |               |
| NM_001167604 | XPNPEP1   | 1879 | 1941 | 7.93311804798   |               |
| NM_001167604 | XPNPEP1   | 802  | 911  | 8.93311804799   |               |

|              |          |      |      |               |               |
|--------------|----------|------|------|---------------|---------------|
| NM_001167604 | XPNPEP1  | 472  | 623  | 8.93311804799 |               |
| NM_001167604 | XPNPEP1  | 1713 | 1872 | 8.93311804799 |               |
| NM_001167604 | XPNPEP1  | 1134 | 1190 | 7.93311131694 |               |
| NM_001134368 | SLC6A6   | 447  | 540  | 11.6967918844 |               |
| NM_001134368 | SLC6A6   | 565  | 920  | 12.9862985016 |               |
| NM_001134368 | SLC6A6   | 264  | 404  | 9.52686688293 |               |
| NM_138709    | DAB2IP   | 3010 | 3071 | 5.37241751428 |               |
| NM_138709    | DAB2IP   | 2855 | 2923 | 6.95738025092 |               |
| NM_138709    | DAB2IP   | 1302 | 1386 | 6.95738025091 |               |
| NM_138709    | DAB2IP   | 388  | 502  | 7.69434584508 |               |
| NM_138709    | DAB2IP   | 1495 | 1569 | 7.37241774265 |               |
| NM_138709    | DAB2IP   | 1078 | 1179 | 6.3724177502  |               |
| NM_138709    | DAB2IP   | 1767 | 1891 | 5.3724177502  |               |
| NM_003848    | SUCLG2   | 902  | 939  | 5.0877200145  |               |
| NM_003849    | SUCLG1   | 304  | 353  | 4.31400553042 |               |
| NM_003849    | SUCLG1   | 401  | 459  | 4.31400553042 |               |
| NM_003849    | SUCLG1   | 1148 | 1235 | 5.31400576634 |               |
| NM_003849    | SUCLG1   | 887  | 946  | 4.89896826706 |               |
| NM_003849    | SUCLG1   | 784  | 884  | 5.31400576634 |               |
| NM_001010924 | FAM171A1 |      | 3037 | 3121          | 5.88191684822 |
| NM_001010924 | FAM171A1 |      | 2584 | 2633          | 4.29293674732 |
| NM_001010924 | FAM171A1 |      | 3218 | 3295          | 5.29695433995 |
| NM_001010924 | FAM171A1 |      | 256  | 429           | 7.10430926955 |
| NM_001010924 | FAM171A1 |      | 2778 | 2868          | 4.29293674732 |
| NM_001010924 | FAM171A1 |      | 446  | 503           | 5.29694761644 |
| NM_001010924 | FAM171A1 |      | 1964 | 2073          | 5.2969543475  |
| NM_001199812 | INTS7    | 1214 | 1265 | 8.87483287816 |               |
| NM_001199812 | INTS7    | 2910 | 2950 | 7.28987037744 |               |
| NM_001199812 | INTS7    | 2341 | 2403 | 7.29004389184 |               |
| NM_001199812 | INTS7    | 1772 | 1827 | 8.87483287816 |               |
| NM_001199812 | INTS7    | 1509 | 1584 | 9.29004389184 |               |
| NM_001199812 | INTS7    | 1405 | 1478 | 8.29003739671 |               |
| NM_001199812 | INTS7    | 1608 | 1720 | 9.29004412776 |               |
| NM_001199812 | INTS7    | 842  | 934  | 7.28602652759 |               |
| NM_001199812 | INTS7    | 641  | 697  | 7.28602652759 |               |
| NM_001199812 | INTS7    | 169  | 240  | 7.28602652759 |               |
| NM_001199812 | INTS7    | 1336 | 1393 | 9.29004412754 |               |
| NM_001199812 | INTS7    | 2558 | 2621 | 8.87499989743 |               |
| NM_001199812 | INTS7    | 2073 | 2165 | 8.29004412776 |               |
| NM_001199812 | INTS7    | 253  | 328  | 8.87500662848 |               |
| NM_001199812 | INTS7    | 504  | 627  | 9.29004412775 |               |
| NM_001199812 | INTS7    | 2416 | 2509 | 9.6119722151  |               |
| NM_001199812 | INTS7    | 2657 | 2783 | 10.0973990498 |               |
| NM_001199812 | INTS7    | 3371 | 3447 | 7.29004412776 |               |
| NM_001199817 | GGCT     | 64   | 110  | 9.16288639893 |               |
| NM_001199817 | GGCT     | 605  | 777  | 10.4848145014 |               |
| NM_001199817 | GGCT     | 292  | 342  | 8.74767515688 |               |
| NM_001199817 | GGCT     | 110  | 248  | 9.16288640648 |               |
| NM_001199817 | GGCT     | 455  | 559  | 8.16288640626 |               |
| NM_198495    | CTAGE4   | 2442 | 2480 | 9.3464525157  |               |

|              |          |      |      |                    |
|--------------|----------|------|------|--------------------|
| NM_198495    | CTAGE4   | 218  | 267  | 9.43059172508      |
| NM_024052    | C17orf39 |      | 2544 | 2564 8.39401706437 |
| NM_024053    | CENPM    | 122  | 175  | 10.1827511694      |
| NM_024053    | CENPM    | 502  | 576  | 10.7677134344      |
| NM_024053    | CENPM    | 222  | 282  | 10.7677136703      |
| NM_024053    | CENPM    | 830  | 874  | 9.17873356941      |
| NM_024050    | DDA1     | 2204 | 2271 | 5.35616140595      |
| NM_024050    | DDA1     | 3218 | 3276 | 4.35214381332      |
| NM_024050    | DDA1     | 763  | 796  | 5.27202220411      |
| NM_024050    | DDA1     | 2863 | 2905 | 5.94111718316      |
| NM_024050    | DDA1     | 405  | 477  | 4.35616117758      |
| NM_024050    | DDA1     | 1783 | 1843 | 4.35214381332      |
| NM_024050    | DDA1     | 3975 | 4010 | 5.35214381332      |
| NM_024050    | DDA1     | 122  | 169  | 5.35598766318      |
| NM_024050    | DDA1     | 3299 | 3363 | 4.35598766318      |
| NM_024050    | DDA1     | 602  | 683  | 6.67808950838      |
| NM_024050    | DDA1     | 169  | 341  | 7.52608641494      |
| NM_001164773 | BCAT2    | 197  | 263  | 11.9175790204      |
| NM_001164773 | BCAT2    | 921  | 1044 | 11.9175857515      |
| NM_001164773 | BCAT2    | 496  | 651  | 13.7249406735      |
| NM_024057    | NUP37    | 480  | 571  | 4.44927511985      |
| NM_024057    | NUP37    | 82   | 228  | 7.11837682995      |
| NM_024057    | NUP37    | 606  | 682  | 6.11837682995      |
| NM_024057    | NUP37    | 296  | 379  | 5.53341409331      |
| NM_024057    | NUP37    | 912  | 996  | 4.53341432923      |
| NM_145689    | APBB1    | 1621 | 1694 | 13.1505104096      |
| NM_001171654 | KLHL5    | 6819 | 6918 | 4.70001293991      |
| NM_001171654 | KLHL5    | 2249 | 2290 | 5.28480169787      |
| NM_001171654 | KLHL5    | 5223 | 5320 | 5.28480169787      |
| NM_001171654 | KLHL5    | 3447 | 3494 | 3.70000621641      |
| NM_001171654 | KLHL5    | 2867 | 2933 | 5.70001294746      |
| NM_001171654 | KLHL5    | 1352 | 1436 | 4.70001294746      |
| NM_001171654 | KLHL5    | 1187 | 1243 | 5.70001294746      |
| NM_001171654 | KLHL5    | 3052 | 3107 | 4.70001293991      |
| NM_001171654 | KLHL5    | 2520 | 2556 | 5.28095784801      |
| NM_001171654 | KLHL5    | 1006 | 1057 | 4.70001294746      |
| NM_001171654 | KLHL5    | 837  | 887  | 5.70001293991      |
| NM_001171654 | KLHL5    | 5048 | 5114 | 5.28497544818      |
| NM_001171654 | KLHL5    | 442  | 490  | 5.28497544818      |
| NM_001171654 | KLHL5    | 2938 | 3016 | 5.28497544063      |
| NM_001171654 | KLHL5    | 5605 | 5649 | 3.70000621641      |
| NM_001171654 | KLHL5    | 1253 | 1346 | 5.28497544818      |
| NM_001171654 | KLHL5    | 494  | 568  | 4.70001294746      |
| NM_001171654 | KLHL5    | 691  | 767  | 3.70001293991      |
| NM_001171654 | KLHL5    | 890  | 1004 | 6.50736786952      |
| NM_001171654 | KLHL5    | 391  | 433  | 5.28095784801      |
| NM_001171654 | KLHL5    | 1444 | 1520 | 6.28497544818      |
| NM_001171654 | KLHL5    | 3646 | 3704 | 3.70001294724      |
| NM_001171654 | KLHL5    | 1543 | 1672 | 6.70001294746      |
| NM_001171654 | KLHL5    | 1686 | 1841 | 7.1594445661       |



|              |          |      |      |               |               |
|--------------|----------|------|------|---------------|---------------|
| NM_001171654 | KLHL5    | 1858 | 2031 | 5.70001294746 |               |
| NM_001171654 | KLHL5    | 253  | 327  | 5.70001294746 |               |
| NM_001142853 | HES6     | 640  | 696  | 8.57339822492 |               |
| NM_001142853 | HES6     | 736  | 803  | 9.57741558917 |               |
| NM_018663    | PXMP2    | 185  | 242  | 10.0437546105 |               |
| NM_018663    | PXMP2    | 245  | 303  | 11.4498219148 |               |
| NM_018663    | PXMP2    | 569  | 632  | 10.127893584  |               |
| NM_000943    | PPIC     | 443  | 499  | 6.12859492295 |               |
| NM_000943    | PPIC     | 212  | 332  | 8.13261252313 |               |
| NM_000943    | PPIC     | 93   | 191  | 8.13261252313 |               |
| NM_000943    | PPIC     | 586  | 782  | 9.30253752457 |               |
| NM_000943    | PPIC     | 334  | 388  | 6.12859492295 |               |
| NM_018845    | SLC50A1  | 479  | 538  | 10.0627751593 |               |
| NM_018845    | SLC50A1  | 78   | 143  | 10.0627751593 |               |
| NM_018845    | SLC50A1  | 390  | 430  | 9.47781265861 |               |
| NM_018845    | SLC50A1  | 1191 | 1317 | 8.47781265861 |               |
| NM_018845    | SLC50A1  | 559  | 624  | 9.4778124227  |               |
| NM_018845    | SLC50A1  | 854  | 1067 | 10.7997407535 |               |
| NM_018845    | SLC50A1  | 144  | 234  | 10.0627751593 |               |
| NM_018845    | SLC50A1  | 657  | 828  | 11.6477376601 |               |
| NM_018845    | SLC50A1  | 245  | 385  | 11.0627751593 |               |
| NM_024580    | EFTUD1   | 671  | 737  | 6.01732141041 |               |
| NM_024580    | EFTUD1   | 1361 | 1416 | 6.10128686948 |               |
| NM_024580    | EFTUD1   | 1099 | 1159 | 6.01732141041 |               |
| NM_024580    | EFTUD1   | 3387 | 3437 | 6.10128686948 |               |
| NM_024580    | EFTUD1   | 1851 | 1941 | 7.09744301962 |               |
| NM_018842    | BAIAP2L1 |      | 550  | 626           | 7.23547642311 |
| NM_018842    | BAIAP2L1 |      | 2115 | 2163          | 7.23547642311 |
| NM_018842    | BAIAP2L1 |      | 3474 | 3559          | 5.82043892383 |
| NM_018842    | BAIAP2L1 |      | 2058 | 2103          | 5.15133721372 |
| NM_018842    | BAIAP2L1 |      | 3026 | 3113          | 6.23547642311 |
| NM_018842    | BAIAP2L1 |      | 1430 | 1487          | 4.23547618719 |
| NM_018842    | BAIAP2L1 |      | 2623 | 2694          | 5.82043892383 |
| NM_018842    | BAIAP2L1 |      | 3119 | 3169          | 5.82043891628 |
| NM_018842    | BAIAP2L1 |      | 2293 | 2353          | 5.23547641556 |
| NM_018842    | BAIAP2L1 |      | 1377 | 1418          | 5.2354764231  |
| NM_018842    | BAIAP2L1 |      | 76   | 139           | 4.23145882293 |
| NM_018842    | BAIAP2L1 |      | 3601 | 3664          | 4.23547642311 |
| NM_018842    | BAIAP2L1 |      | 962  | 1111          | 6.23547642311 |
| NM_018842    | BAIAP2L1 |      | 1829 | 2048          | 8.48340393655 |
| NM_018842    | BAIAP2L1 |      | 460  | 523           | 4.23530267279 |
| NM_018842    | BAIAP2L1 |      | 1664 | 1813          | 7.04283134516 |
| NM_018842    | BAIAP2L1 |      | 1513 | 1586          | 6.55740451799 |
| NM_018842    | BAIAP2L1 |      | 2938 | 3009          | 5.23547641556 |
| NM_018842    | BAIAP2L1 |      | 2355 | 2452          | 6.23547642311 |
| NM_018842    | BAIAP2L1 |      | 1238 | 1357          | 7.23547642311 |
| NM_018842    | BAIAP2L1 |      | 3314 | 3380          | 5.23547618719 |
| NM_018842    | BAIAP2L1 |      | 698  | 945           | 8.32293926436 |
| NM_018842    | BAIAP2L1 |      | 277  | 447           | 7.69490804174 |
| NM_018842    | BAIAP2L1 |      | 2708 | 2840          | 7.40540142455 |

|              |          |      |      |                    |
|--------------|----------|------|------|--------------------|
| NM_024582    | FAT4     | 2053 | 2141 | 11.1099964021      |
| NM_018843    | SLC25A40 |      | 1947 | 2000 8.08526921482 |
| NM_018843    | SLC25A40 |      | 1029 | 1111 8.6740755654  |
| NM_018843    | SLC25A40 |      | 2171 | 2225 8.08911306468 |
| NM_018843    | SLC25A40 |      | 897  | 992 9.41121490989  |
| NM_018843    | SLC25A40 |      | 1417 | 1467 8.08526921482 |
| NM_018843    | SLC25A40 |      | 2677 | 2744 7.08526921482 |
| NM_015560    | OPA1     | 1193 | 1236 | 3.71408957299      |
| NM_015560    | OPA1     | 2818 | 2884 | 5.29905207371      |
| NM_015560    | OPA1     | 1098 | 1146 | 4.7942111822       |
| NM_015560    | OPA1     | 1530 | 1619 | 4.7942111822       |
| NM_015560    | OPA1     | 3833 | 3894 | 3.7942111822       |
| NM_015560    | OPA1     | 1736 | 1775 | 3.71408957299      |
| NM_015560    | OPA1     | 998  | 1076 | 4.79822205132      |
| NM_015560    | OPA1     | 2614 | 2731 | 4.79822878237      |
| NM_015560    | OPA1     | 1308 | 1384 | 5.38319128309      |
| NM_015560    | OPA1     | 579  | 666  | 6.12015687725      |
| NM_001130996 | HMGCR    | 3153 | 3204 | 4.14204999093      |
| NM_001130996 | HMGCR    | 2389 | 2434 | 5.05791078177      |
| NM_001130996 | HMGCR    | 202  | 373  | 8.46397808604      |
| NM_001130996 | HMGCR    | 3349 | 3431 | 5.14204975523      |
| NM_001130996 | HMGCR    | 2498 | 2590 | 6.46397808604      |
| NM_001130996 | HMGCR    | 399  | 445  | 6.1420432601       |
| NM_001130996 | HMGCR    | 2619 | 2808 | 7.60148160979      |
| NM_001130996 | HMGCR    | 2813 | 2911 | 6.94940491321      |
| NM_001130996 | HMGCR    | 2259 | 2357 | 7.14204999115      |
| NM_001130996 | HMGCR    | 1569 | 1717 | 7.3119749926       |
| NM_001130996 | HMGCR    | 2942 | 3022 | 4.14187624084      |
| NM_001130996 | HMGCR    | 3037 | 3141 | 6.94940491321      |
| NM_001130996 | HMGCR    | 4062 | 4126 | 6.1420432601       |
| NM_001130996 | HMGCR    | 1939 | 2247 | 8.78590618093      |
| NM_001130996 | HMGCR    | 604  | 869  | 8.60148160979      |
| NM_001130996 | HMGCR    | 66   | 194  | 7.46397808604      |
| NM_001130996 | HMGCR    | 4127 | 4278 | 6.14204999115      |
| NM_001130996 | HMGCR    | 1737 | 1933 | 7.94940491321      |
| NM_001130996 | HMGCR    | 870  | 1555 | 10.42745221        |
| NM_153369    | KIAA1919 |      | 1726 | 1797 8.79332027743 |
| NM_153369    | KIAA1919 |      | 1479 | 1516 9.79332027743 |
| NM_153369    | KIAA1919 |      | 1299 | 1339 8.79716412729 |
| NM_153369    | KIAA1919 |      | 1936 | 2020 10.3823003781 |
| NM_153369    | KIAA1919 |      | 1108 | 1157 8.79733787738 |
| NM_153369    | KIAA1919 |      | 687  | 743 10.7973378701  |
| NM_153369    | KIAA1919 |      | 1355 | 1406 10.3822936473 |
| NM_153369    | KIAA1919 |      | 842  | 1033 13.1192659725 |
| NM_153369    | KIAA1919 |      | 1646 | 1725 9.7973378776  |
| NM_153369    | KIAA1919 |      | 419  | 668 12.1192659725  |
| NM_153369    | KIAA1919 |      | 1530 | 1645 11.6046927997 |
| NM_153369    | KIAA1919 |      | 3521 | 3589 8.79332027743 |
| NM_006764    | IFRD2    | 1570 | 1614 | 8.48478050071      |
| NM_006764    | IFRD2    | 1443 | 1528 | 9.56891971009      |

|           |        |      |      |               |
|-----------|--------|------|------|---------------|
| NM_006764 | IFRD2  | 737  | 793  | 8.56490210992 |
| NM_006764 | IFRD2  | 531  | 591  | 6.98395720937 |
| NM_006764 | IFRD2  | 864  | 936  | 7.98395720937 |
| NM_006764 | IFRD2  | 1122 | 1170 | 6.98378345906 |
| NM_006764 | IFRD2  | 1210 | 1304 | 7.98395720937 |
| NM_153365 | TAPT1  | 786  | 848  | 10.7755711588 |
| NM_153365 | TAPT1  | 1089 | 1163 | 8.77557115863 |
| NM_153365 | TAPT1  | 849  | 906  | 9.19060865813 |
| NM_153365 | TAPT1  | 1615 | 1716 | 9.77557115885 |
| NM_153365 | TAPT1  | 912  | 980  | 9.19060865812 |
| NM_153365 | TAPT1  | 276  | 334  | 8.77557092293 |
| NM_153365 | TAPT1  | 3092 | 3146 | 7.18659105795 |
| NM_153365 | TAPT1  | 3250 | 3284 | 7.18659105795 |
| NM_153365 | TAPT1  | 1757 | 1819 | 9.77557115885 |
| NM_153365 | TAPT1  | 1357 | 1441 | 9.19060865813 |
| NM_153365 | TAPT1  | 400  | 770  | 12.0485896533 |
| NM_153365 | TAPT1  | 1477 | 1608 | 8.19060865813 |
| NM_153365 | TAPT1  | 1191 | 1332 | 10.3605336596 |
| NM_006767 | LZTR1  | 2086 | 2127 | 8.30292259804 |
| NM_006767 | LZTR1  | 2545 | 2605 | 6.29890500542 |
| NM_006767 | LZTR1  | 843  | 928  | 7.88788510631 |
| NM_006767 | LZTR1  | 4230 | 4271 | 6.30291587454 |
| NM_006767 | LZTR1  | 182  | 228  | 6.30274885528 |
| NM_006767 | LZTR1  | 487  | 520  | 7.21878339621 |
| NM_006767 | LZTR1  | 651  | 755  | 6.30292259804 |
| NM_006767 | LZTR1  | 1693 | 1769 | 7.88788510631 |
| NM_006767 | LZTR1  | 2357 | 2443 | 6.30292260559 |
| NM_006767 | LZTR1  | 543  | 624  | 7.21878339621 |
| NM_006767 | LZTR1  | 2299 | 2353 | 7.88386750614 |
| NM_147134 | NFX1   | 232  | 299  | 6.19906691153 |
| NM_147134 | NFX1   | 2062 | 2120 | 7.19906691152 |
| NM_147134 | NFX1   | 2811 | 2866 | 7.19504931136 |
| NM_147134 | NFX1   | 1517 | 1557 | 7.19504931136 |
| NM_147134 | NFX1   | 1745 | 1850 | 7.78402941225 |
| NM_147134 | NFX1   | 1977 | 2015 | 6.19906018048 |
| NM_005443 | PAPSS1 | 748  | 808  | 4.12388442545 |
| NM_005443 | PAPSS1 | 675  | 740  | 4.70884692617 |
| NM_005443 | PAPSS1 | 2010 | 2057 | 5.44581252033 |
| NM_005443 | PAPSS1 | 1906 | 1948 | 3.12371067514 |
| NM_005443 | PAPSS1 | 2075 | 2145 | 4.70884669026 |
| NM_005443 | PAPSS1 | 1005 | 1057 | 3.1238776944  |
| NM_005443 | PAPSS1 | 1740 | 1896 | 5.12388442545 |
| NM_005443 | PAPSS1 | 276  | 440  | 5.93123934751 |
| NM_005444 | RQCD1  | 2535 | 2570 | 7.58071271091 |
| NM_005444 | RQCD1  | 961  | 1007 | 8.6648519203  |
| NM_005444 | RQCD1  | 1341 | 1407 | 9.2498141851  |
| NM_005444 | RQCD1  | 863  | 916  | 8.66485191275 |
| NM_005444 | RQCD1  | 498  | 543  | 7.66467816998 |
| NM_005444 | RQCD1  | 3297 | 3334 | 7.66485168438 |
| NM_005444 | RQCD1  | 2959 | 3033 | 7.66485192029 |

|           |        |      |      |               |
|-----------|--------|------|------|---------------|
| NM_005445 | SMC3   | 2050 | 2097 | 3.28872192264 |
| NM_005445 | SMC3   | 2577 | 2666 | 2.29273951527 |
| NM_005445 | SMC3   | 818  | 857  | 2.20860031343 |
| NM_005445 | SMC3   | 2137 | 2202 | 2.29273952281 |
| NM_005445 | SMC3   | 1715 | 1797 | 4.61466761748 |
| NM_005445 | SMC3   | 3915 | 4028 | 4.29273952282 |
| NM_005445 | SMC3   | 155  | 256  | 5.10009444487 |
| NM_005445 | SMC3   | 3473 | 3514 | 3.20860031343 |
| NM_005445 | SMC3   | 2711 | 2782 | 4.29273952282 |
| NM_005445 | SMC3   | 3067 | 3116 | 3.28872192264 |
| NM_005445 | SMC3   | 3524 | 3689 | 5.46266452426 |
| NM_005445 | SMC3   | 1150 | 1247 | 2.29273279176 |
| NM_005445 | SMC3   | 1489 | 1577 | 3.29273279176 |
| NM_005445 | SMC3   | 1374 | 1484 | 2.29273952282 |
| NM_005445 | SMC3   | 2824 | 3019 | 5.29273952282 |
| NM_005445 | SMC3   | 280  | 361  | 3.87770201599 |
| NM_021982 | SEC24A | 2475 | 2562 | 9.34756259947 |
| NM_021982 | SEC24A | 2685 | 2727 | 7.9414952952  |
| NM_021982 | SEC24A | 2843 | 2902 | 9.6105970053  |
| NM_021982 | SEC24A | 3899 | 3967 | 7.02161690441 |
| NM_021982 | SEC24A | 1041 | 1113 | 8.6105970053  |
| NM_021982 | SEC24A | 5874 | 5906 | 7.02546075426 |
| NM_021982 | SEC24A | 3346 | 3391 | 9.02563450458 |
| NM_021982 | SEC24A | 3601 | 3697 | 9.6105970053  |
| NM_021982 | SEC24A | 795  | 842  | 8.61059027425 |
| NM_021982 | SEC24A | 1947 | 2011 | 9.02563450458 |
| NM_021982 | SEC24A | 2282 | 2458 | 10.8329894266 |
| NM_021982 | SEC24A | 1504 | 1570 | 9.02563450458 |
| NM_021982 | SEC24A | 2971 | 3061 | 9.83298942664 |
| NM_021982 | SEC24A | 459  | 560  | 9.02563449703 |
| NM_021982 | SEC24A | 613  | 678  | 7.02563426866 |
| NM_021982 | SEC24A | 2729 | 2816 | 9.6105970053  |
| NM_021982 | SEC24A | 185  | 267  | 7.02563450458 |
| NM_021982 | SEC24A | 1628 | 1735 | 9.83298942664 |
| NM_021982 | SEC24A | 1356 | 1464 | 8.02563450458 |
| NM_021982 | SEC24A | 2055 | 2180 | 8.6105970053  |
| NM_021982 | SEC24A | 1779 | 1865 | 8.6105970053  |
| NM_080836 | STK35  | 4737 | 4786 | 6.30109945866 |
| NM_080836 | STK35  | 3485 | 3548 | 7.30511032778 |
| NM_080836 | STK35  | 4356 | 4431 | 8.30494330851 |
| NM_080836 | STK35  | 1329 | 1401 | 6.30511032778 |
| NM_080836 | STK35  | 763  | 992  | 8.62704515372 |
| NM_080836 | STK35  | 4481 | 4531 | 7.30109945866 |
| NM_080836 | STK35  | 1977 | 2028 | 6.30109945866 |
| NM_080836 | STK35  | 6255 | 6324 | 7.890079552   |
| NM_003667 | LGR5   | 1671 | 1733 | 8.37715707505 |
| NM_003667 | LGR5   | 2522 | 2636 | 9.96211957577 |
| NM_003667 | LGR5   | 1574 | 1641 | 8.69908516994 |
| NM_003667 | LGR5   | 1433 | 1482 | 7.87798036639 |
| NM_003667 | LGR5   | 301  | 357  | 7.29301786567 |

|           |          |      |      |                    |
|-----------|----------|------|------|--------------------|
| NM_003667 | LGR5     | 427  | 490  | 6.37715683913      |
| NM_003667 | LGR5     | 3040 | 3101 | 6.37715707483      |
| NM_003667 | LGR5     | 1485 | 1561 | 8.96211957577      |
| NM_003667 | LGR5     | 4363 | 4428 | 7.37313947488      |
| NM_003667 | LGR5     | 2736 | 2930 | 9.96211957577      |
| NM_003667 | LGR5     | 3965 | 4068 | 8.96211957577      |
| NM_003667 | LGR5     | 2243 | 2405 | 10.377157075       |
| NM_003667 | LGR5     | 823  | 955  | 7.96211957577      |
| NM_003667 | LGR5     | 592  | 633  | 6.37313947488      |
| NM_003667 | LGR5     | 4442 | 4488 | 6.37715683913      |
| NM_003667 | LGR5     | 2475 | 2516 | 7.37313947488      |
| NM_003667 | LGR5     | 4083 | 4170 | 8.96211957577      |
| NM_003667 | LGR5     | 1191 | 1406 | 10.0775967932      |
| NM_003667 | LGR5     | 1948 | 2107 | 9.69908516994      |
| NM_003667 | LGR5     | 1744 | 1923 | 9.96211957577      |
| NM_003667 | LGR5     | 492  | 578  | 7.96211957555      |
| NM_003667 | LGR5     | 2939 | 3032 | 9.18451199711      |
| NM_003667 | LGR5     | 955  | 1132 | 8.96211957577      |
| NM_003664 | AP3B1    | 1134 | 1177 | 4.60362364495      |
| NM_003664 | AP3B1    | 3337 | 3371 | 5.68374525416      |
| NM_003664 | AP3B1    | 1849 | 1916 | 5.68776285411      |
| NM_003664 | AP3B1    | 2581 | 2636 | 5.68776285432      |
| NM_003664 | AP3B1    | 2719 | 2772 | 5.68776261841      |
| NM_003664 | AP3B1    | 1665 | 1733 | 4.68758910401      |
| NM_003664 | AP3B1    | 2789 | 2831 | 4.68374525416      |
| NM_003664 | AP3B1    | 1753 | 1794 | 5.68776284678      |
| NM_003664 | AP3B1    | 2857 | 2927 | 6.27272535483      |
| NM_003664 | AP3B1    | 914  | 957  | 5.68758910401      |
| NM_003664 | AP3B1    | 2247 | 2287 | 4.68374525416      |
| NM_003664 | AP3B1    | 395  | 441  | 6.27272511913      |
| NM_003664 | AP3B1    | 1297 | 1357 | 5.68775612328      |
| NM_003664 | AP3B1    | 1501 | 1564 | 6.68374525416      |
| NM_003664 | AP3B1    | 2476 | 2570 | 5.68776261841      |
| NM_003664 | AP3B1    | 960  | 1085 | 7.00969094922      |
| NM_003664 | AP3B1    | 2105 | 2232 | 7.00969094922      |
| NM_003664 | AP3B1    | 2305 | 2376 | 4.68776285433      |
| NM_003664 | AP3B1    | 3672 | 3745 | 6.68776285433      |
| NM_003664 | AP3B1    | 3015 | 3065 | 4.68374525416      |
| NM_018438 | FBX06    | 240  | 325  | 11.879582737       |
| NM_003668 | MAPKAPK5 |      | 1784 | 1883 5.77602556984 |
| NM_002829 | PTPN3    | 3738 | 3811 | 7.35116373961      |
| NM_002829 | PTPN3    | 3223 | 3303 | 8.35116373961      |
| NM_002829 | PTPN3    | 635  | 694  | 7.26702453023      |
| NM_002829 | PTPN3    | 3896 | 3952 | 7.35098998929      |
| NM_002829 | PTPN3    | 3524 | 3602 | 7.35115700856      |
| NM_002829 | PTPN3    | 806  | 853  | 7.34714613944      |
| NM_002829 | PTPN3    | 695  | 788  | 8.35116350369      |
| NM_002829 | PTPN3    | 961  | 1016 | 7.35098998929      |
| NM_002822 | TWF1     | 2207 | 2267 | 5.74720345882      |
| NM_002822 | TWF1     | 1739 | 1846 | 5.74720369473      |

|           |        |      |       |               |
|-----------|--------|------|-------|---------------|
| NM_002822 | TWF1   | 915  | 978   | 4.66306448535 |
| NM_002822 | TWF1   | 766  | 803   | 4.74318609457 |
| NM_002822 | TWF1   | 606  | 643   | 4.74318609457 |
| NM_002822 | TWF1   | 1556 | 1606  | 4.74719696368 |
| NM_002822 | TWF1   | 1395 | 1496  | 4.74702994442 |
| NM_002396 | ME2    | 1869 | 1905  | 6.38350501515 |
| NM_002396 | ME2    | 866  | 953   | 6.46362662436 |
| NM_002396 | ME2    | 1223 | 1325  | 8.05260672525 |
| NM_002827 | PTPN1  | 633  | 715   | 6.62031349505 |
| NM_002827 | PTPN1  | 2325 | 2376  | 6.70043510426 |
| NM_002393 | MDM4   | 136  | 198   | 7.76600933883 |
| NM_002393 | MDM4   | 9966 | 10028 | 6.18122035251 |
| NM_002393 | MDM4   | 2324 | 2374  | 6.18121385737 |
| NM_002393 | MDM4   | 5963 | 6059  | 7.18122058843 |
| NM_002393 | MDM4   | 4474 | 4519  | 6.18104683811 |
| NM_002393 | MDM4   | 4859 | 4968  | 6.18122058843 |
| NM_002393 | MDM4   | 5447 | 5523  | 7.18104683811 |
| NM_002393 | MDM4   | 7065 | 7206  | 8.18122058843 |
| NM_002393 | MDM4   | 4287 | 4370  | 6.18122058843 |
| NM_002392 | MDM2   | 1731 | 1825  | 6.44296671719 |
| NM_002392 | MDM2   | 1585 | 1617  | 5.11702102213 |
| NM_002392 | MDM2   | 321  | 371   | 5.12086487198 |
| NM_002392 | MDM2   | 3309 | 3360  | 4.03689941292 |
| NM_002392 | MDM2   | 1827 | 1887  | 5.12103838638 |
| NM_002392 | MDM2   | 1196 | 1243  | 5.12103838638 |
| NM_002392 | MDM2   | 2986 | 3044  | 5.7060011228  |
| NM_002392 | MDM2   | 3063 | 3164  | 6.1210386223  |
| NM_002392 | MDM2   | 6053 | 6129  | 6.1210386223  |
| NM_002392 | MDM2   | 5543 | 5632  | 6.44296671719 |
| NM_002392 | MDM2   | 4540 | 4579  | 4.11702102213 |
| NM_002392 | MDM2   | 377  | 416   | 4.11702102213 |
| NM_002392 | MDM2   | 3762 | 3830  | 6.12103838638 |
| NM_002392 | MDM2   | 5418 | 5497  | 5.12103862208 |
| NM_002392 | MDM2   | 3891 | 3937  | 5.11702102213 |
| NM_002392 | MDM2   | 2260 | 2348  | 6.44296671719 |
| NM_002392 | MDM2   | 2107 | 2193  | 4.1210386223  |
| NM_002392 | MDM2   | 1340 | 1410  | 6.1210386223  |
| NM_002392 | MDM2   | 936  | 1135  | 6.44296671719 |
| NM_002392 | MDM2   | 1931 | 2061  | 6.1210386223  |
| NM_002392 | MDM2   | 4763 | 4927  | 7.44296671719 |
| NM_002392 | MDM2   | 5840 | 5997  | 7.1210386223  |
| NM_002392 | MDM2   | 654  | 791   | 6.1210386223  |
| NM_002392 | MDM2   | 2450 | 2522  | 5.1210386223  |
| NM_002392 | MDM2   | 4179 | 4345  | 4.1210386223  |
| NM_002392 | MDM2   | 4028 | 4147  | 6.70600112302 |
| NM_005629 | SLC6A8 | 2801 | 2840  | 4.50182056003 |
| NM_005629 | SLC6A8 | 1274 | 1329  | 5.42169895082 |
| NM_005629 | SLC6A8 | 3069 | 3150  | 5.50583815266 |
| NM_005629 | SLC6A8 | 1982 | 2054  | 4.50583792429 |
| NM_005629 | SLC6A8 | 1354 | 1421  | 4.50182056003 |

|              |          |      |      |                    |
|--------------|----------|------|------|--------------------|
| NM_005629    | SLC6A8   | 868  | 960  | 6.50583816021      |
| NM_005629    | SLC6A8   | 670  | 743  | 4.50583792429      |
| NM_005629    | SLC6A8   | 1590 | 1704 | 7.50583816021      |
| NM_005629    | SLC6A8   | 988  | 1031 | 4.50583142915      |
| NM_005629    | SLC6A8   | 426  | 666  | 7.31319308226      |
| NM_005629    | SLC6A8   | 1738 | 1927 | 7.96526977884      |
| NM_005629    | SLC6A8   | 1051 | 1186 | 6.50583816021      |
| NM_005629    | SLC6A8   | 1452 | 1586 | 7.09080066093      |
| NM_005626    | SRSF4    | 677  | 787  | 4.22648656871      |
| NM_005626    | SRSF4    | 1003 | 1058 | 4.22647983766      |
| NM_005626    | SRSF4    | 2351 | 2432 | 3.22648656871      |
| NM_005626    | SRSF4    | 793  | 872  | 3.22648656871      |
| NM_005626    | SRSF4    | 463  | 556  | 5.81144906943      |
| NM_005626    | SRSF4    | 2266 | 2348 | 3.22648656849      |
| NM_005626    | SRSF4    | 1887 | 2123 | 5.5484146636       |
| NM_005626    | SRSF4    | 2137 | 2238 | 4.81144906943      |
| NM_001014975 | CFH      | 470  | 524  | 11.498276761       |
| NM_001014975 | CFH      | 971  | 1022 | 10.4982767612      |
| NM_001014975 | CFH      | 1059 | 1146 | 12.4982767612      |
| NM_001014975 | CFH      | 1450 | 1507 | 12.0832392619      |
| NM_001014975 | CFH      | 906  | 939  | 11.9991000525      |
| NM_001014975 | CFH      | 1162 | 1214 | 12.4982767612      |
| NM_001014975 | CFH      | 1247 | 1375 | 14.4051673568      |
| NM_001014975 | CFH      | 703  | 845  | 13.9577083798      |
| NM_001014975 | CFH      | 390  | 465  | 12.0830655116      |
| NM_001014975 | CFH      | 1508 | 1640 | 12.8202048561      |
| NM_001014975 | CFH      | 602  | 679  | 12.4982767612      |
| NM_001014975 | CFH      | 181  | 375  | 14.1987164793      |
| NM_152707    | SLC25A16 |      | 1999 | 2082 8.08621821006 |
| NM_152707    | SLC25A16 |      | 916  | 1139 10.4081463049 |
| NM_032211    | LOXL4    | 1837 | 1890 | 8.85676128762      |
| NM_032211    | LOXL4    | 1567 | 1610 | 7.26778118673      |
| NM_032211    | LOXL4    | 714  | 782  | 7.27179855098      |
| NM_032211    | LOXL4    | 2408 | 2456 | 9.85676128762      |
| NM_032211    | LOXL4    | 1912 | 1984 | 9.2717987869       |
| NM_032211    | LOXL4    | 3265 | 3333 | 8.85274368745      |
| NM_032211    | LOXL4    | 2357 | 2407 | 8.85676128007      |
| NM_032211    | LOXL4    | 3066 | 3112 | 8.27179205585      |
| NM_032211    | LOXL4    | 2050 | 2177 | 8.2717987869       |
| NM_032211    | LOXL4    | 1168 | 1228 | 9.85676128762      |
| NM_032211    | LOXL4    | 790  | 917  | 8.85676128762      |
| NM_032211    | LOXL4    | 2923 | 2980 | 8.2717987869       |
| NM_032211    | LOXL4    | 430  | 586  | 9.59372688179      |
| NM_032211    | LOXL4    | 89   | 144  | 7.26778118673      |
| NM_032211    | LOXL4    | 2201 | 2284 | 9.85676128762      |
| NM_003060    | SLC22A5  | 1247 | 1296 | 11.3063232818      |
| NM_003060    | SLC22A5  | 753  | 817  | 9.71734341684      |
| NM_003060    | SLC22A5  | 1415 | 1460 | 11.3061497674      |
| NM_003060    | SLC22A5  | 843  | 961  | 11.721361017       |
| NM_139125    | MASP1    | 1823 | 1893 | 7.87636297256      |

|              |        |      |      |               |
|--------------|--------|------|------|---------------|
| NM_139125    | MASP1  | 102  | 142  | 6.47029566829 |
| NM_139125    | MASP1  | 3676 | 3709 | 6.5504172775  |
| NM_139125    | MASP1  | 2307 | 2358 | 7.87636297256 |
| NM_139125    | MASP1  | 3301 | 3352 | 8.13939737839 |
| NM_139125    | MASP1  | 2889 | 3065 | 9.01386649631 |
| NM_139125    | MASP1  | 3739 | 3826 | 7.13939737839 |
| NM_139125    | MASP1  | 2182 | 2245 | 7.13939737839 |
| NM_139125    | MASP1  | 3213 | 3294 | 6.55443487767 |
| NM_139125    | MASP1  | 725  | 1174 | 10.9119868823 |
| NM_139125    | MASP1  | 2021 | 2136 | 7.55443487767 |
| NM_139125    | MASP1  | 2482 | 2847 | 9.80236239112 |
| NM_139125    | MASP1  | 3393 | 3524 | 8.13939737839 |
| NM_139125    | MASP1  | 3846 | 3939 | 6.55443487767 |
| NM_139125    | MASP1  | 1336 | 1656 | 10.5086311881 |
| NM_139125    | MASP1  | 1231 | 1332 | 6.55443487767 |
| NM_139125    | MASP1  | 283  | 705  | 10.6418977189 |
| NM_001017956 | OS9    | 1805 | 1910 | 5.63012875731 |
| NM_001017956 | OS9    | 1018 | 1075 | 4.78213185076 |
| NM_001017956 | OS9    | 753  | 921  | 6.46020375587 |
| NM_001017956 | OS9    | 1095 | 1179 | 5.46020375587 |
| NM_001017956 | OS9    | 1186 | 1274 | 5.26755867793 |
| NM_001017956 | OS9    | 1944 | 2205 | 7.04516625659 |
| NM_001017956 | OS9    | 2206 | 2612 | 7.78213185076 |
| NM_001017956 | OS9    | 921  | 1009 | 4.46020375587 |
| NM_001017956 | OS9    | 191  | 722  | 8.34284680523 |
| NM_001017956 | OS9    | 1275 | 1773 | 7.10405994565 |
| NM_001144913 | FGFR2  | 771  | 858  | 11.1037295846 |
| NM_001144913 | FGFR2  | 382  | 430  | 10.1035558342 |
| NM_001144913 | FGFR2  | 2264 | 2325 | 11.6846744851 |
| NM_001144913 | FGFR2  | 1741 | 1795 | 11.6886920777 |
| NM_001144913 | FGFR2  | 2056 | 2105 | 11.0997119844 |
| NM_001144913 | FGFR2  | 1571 | 1633 | 11.688518335  |
| NM_001144913 | FGFR2  | 2330 | 2385 | 11.1037295846 |
| NM_001144913 | FGFR2  | 450  | 504  | 12.4256509484 |
| NM_001164269 | RAD51  | 370  | 415  | 8.34289409945 |
| NM_001164269 | RAD51  | 1357 | 1481 | 9.92785660772 |
| NM_006545    | NPRL2  | 1027 | 1085 | 8.18784227296 |
| NM_001163817 | DHCR7  | 2098 | 2153 | 6.38954718882 |
| NM_001163817 | DHCR7  | 2035 | 2074 | 5.38954718882 |
| NM_001163817 | DHCR7  | 1299 | 1370 | 6.12651278299 |
| NM_001163817 | DHCR7  | 1689 | 1747 | 3.80458468788 |
| NM_001163817 | DHCR7  | 2501 | 2613 | 7.12651278299 |
| NM_001163817 | DHCR7  | 1758 | 1935 | 7.97450968954 |
| NM_001163817 | DHCR7  | 1942 | 2024 | 6.12651278299 |
| NM_001163817 | DHCR7  | 2177 | 2462 | 8.05251220154 |
| NM_001163817 | DHCR7  | 290  | 1297 | 10.9644560249 |
| NM_001163817 | DHCR7  | 1373 | 1674 | 7.97450968954 |
| NM_001163817 | DHCR7  | 61   | 284  | 7.8045846881  |
| NM_152564    | VPS13B | 1699 | 1755 | 8.89829664618 |
| NM_152564    | VPS13B | 2237 | 2297 | 7.89829664618 |



|              |         |      |      |                 |
|--------------|---------|------|------|-----------------|
| NM_152564    | VPS13B  | 8367 | 8425 | 7.89829664618   |
| NM_152564    | VPS13B  | 2297 | 2363 | 7.89829664618   |
| NM_152564    | VPS13B  | 2078 | 2131 | 7.81817503697   |
| NM_152564    | VPS13B  | 301  | 347  | 7.90214049604   |
| NM_152564    | VPS13B  | 615  | 684  | 9.4832591469    |
| NM_006015    | ARID1A  | 4737 | 4797 | 8.3900072106    |
| NM_006015    | ARID1A  | 2488 | 2541 | 7.80503821474   |
| NM_006015    | ARID1A  | 3910 | 3964 | 7.80102734563   |
| NM_006015    | ARID1A  | 6477 | 6527 | 6.72090573641   |
| NM_006015    | ARID1A  | 2541 | 2588 | 6.80102734563   |
| NM_006015    | ARID1A  | 7412 | 7467 | 8.38598984635   |
| NM_006015    | ARID1A  | 6606 | 6659 | 6.80504494558   |
| NM_006015    | ARID1A  | 6255 | 6294 | 6.80503821474   |
| NM_006015    | ARID1A  | 3534 | 3606 | 7.8050449458    |
| NM_006015    | ARID1A  | 7653 | 7705 | 6.80503821474   |
| NM_006015    | ARID1A  | 3631 | 3704 | 6.80504494558   |
| NM_006015    | ARID1A  | 7473 | 7523 | 6.80102734563   |
| NM_006015    | ARID1A  | 3110 | 3158 | 7.80102734563   |
| NM_006015    | ARID1A  | 7760 | 7865 | 7.8050449458    |
| NM_006015    | ARID1A  | 3405 | 3459 | 8.30586823714   |
| NM_006015    | ARID1A  | 5837 | 5874 | 7.80102734563   |
| NM_006015    | ARID1A  | 7077 | 7158 | 6.80487119548   |
| NM_006015    | ARID1A  | 5485 | 5625 | 8.8050449458    |
| NM_006015    | ARID1A  | 6709 | 6781 | 7.80503821474   |
| NM_006015    | ARID1A  | 7961 | 8048 | 7.8050449458    |
| NM_152562    | CDCA2   | 1661 | 1706 | 8.79010341157   |
| NM_152562    | CDCA2   | 727  | 777  | 8.79027043084   |
| NM_152562    | CDCA2   | 1869 | 1925 | 8.78625956172   |
| NM_152562    | CDCA2   | 1061 | 1264 | 10.597632084    |
| NM_152562    | CDCA2   | 3569 | 3644 | 8.79027692597   |
| NM_021870    | FGG     | 446  | 500  | 0.944602976728  |
| NM_021870    | FGG     | 850  | 923  | 1.35964047623   |
| NM_021870    | FGG     | 562  | 622  | 0.355622876056  |
| NM_021870    | FGG     | 1302 | 1337 | -0.724498733155 |
| NM_021870    | FGG     | 655  | 698  | 0.944602741031  |
| NM_021870    | FGG     | 250  | 306  | 1.35946672591   |
| NM_021870    | FGG     | 1141 | 1230 | 2.35964047623   |
| NM_021870    | FGG     | 1385 | 1419 | -0.640533274089 |
| NM_021870    | FGG     | 953  | 1127 | 2.68156857112   |
| NM_021870    | FGG     | 719  | 846  | 2.16699539829   |
| NM_021870    | FGG     | 142  | 245  | 1.68156856357   |
| NM_001001132 | ITSN1   | 3888 | 3924 | 6.19521999408   |
| NM_001001132 | ITSN1   | 4726 | 4794 | 6.19521999408   |
| NM_001001132 | ITSN1   | 5034 | 5087 | 6.7801824948    |
| NM_015665    | AAAS    | 553  | 599  | 9.38776456903   |
| NM_015665    | AAAS    | 133  | 192  | 9.79878470406   |
| NM_015665    | AAAS    | 774  | 915  | 8.80280230423   |
| NM_018295    | TMEM140 | 196  | 277  | 7.73028254169   |
| NM_018295    | TMEM140 | 629  | 688  | 7.73028254901   |
| NM_018295    | TMEM140 | 1407 | 1467 | 6.73010879892   |

|              |         |      |      |               |
|--------------|---------|------|------|---------------|
| NM_018295    | TMEM140 | 757  | 821  | 7.73028231332 |
| NM_018295    | TMEM140 | 322  | 459  | 9.73028254924 |
| NM_018290    | PGM2    | 650  | 705  | 8.61062244274 |
| NM_018290    | PGM2    | 1136 | 1182 | 8.02565321119 |
| NM_018290    | PGM2    | 952  | 1013 | 7.94152073286 |
| NM_018290    | PGM2    | 1829 | 1873 | 8.61061571191 |
| NM_018290    | PGM2    | 1583 | 1658 | 7.02565993469 |
| NM_018290    | PGM2    | 349  | 415  | 8.02565970632 |
| NM_018290    | PGM2    | 1338 | 1405 | 8.02164234207 |
| NM_018290    | PGM2    | 911  | 941  | 7.02548619192 |
| NM_018290    | PGM2    | 1021 | 1069 | 7.02164234207 |
| NM_018290    | PGM2    | 775  | 816  | 8.02548619192 |
| NM_018290    | PGM2    | 2201 | 2259 | 7.02565994202 |
| NM_002539    | ODC1    | 1780 | 1831 | 5.62937725589 |
| NM_002539    | ODC1    | 2104 | 2180 | 5.04843234779 |
| NM_002539    | ODC1    | 1927 | 1967 | 5.63339462014 |
| NM_002539    | ODC1    | 937  | 1005 | 5.04825860502 |
| NM_002539    | ODC1    | 1978 | 2047 | 5.04825860502 |
| NM_002539    | ODC1    | 1631 | 1747 | 6.63339485606 |
| NM_002539    | ODC1    | 538  | 669  | 6.63339485606 |
| NM_002539    | ODC1    | 1417 | 1551 | 7.37036045023 |
| NM_002539    | ODC1    | 1106 | 1386 | 7.63339485606 |
| NM_002539    | ODC1    | 779  | 860  | 5.04843235533 |
| NM_183239    | GST02   | 863  | 930  | 12.1992854938 |
| NM_183239    | GST02   | 1246 | 1315 | 10.6143229931 |
| NM_002533    | NVL     | 1274 | 1350 | 7.07500771089 |
| NM_002532    | NUP88   | 1494 | 1566 | 7.45422849961 |
| NM_002532    | NUP88   | 126  | 178  | 6.9493876081  |
| NM_002532    | NUP88   | 381  | 512  | 8.27533330316 |
| NM_002532    | NUP88   | 262  | 309  | 5.95339847722 |
| NM_002532    | NUP88   | 986  | 1047 | 7.53836770899 |
| NM_002532    | NUP88   | 629  | 663  | 7.45422849961 |
| NM_002532    | NUP88   | 1048 | 1133 | 7.53836770877 |
| NM_002532    | NUP88   | 1157 | 1228 | 5.95339847722 |
| NM_002536    | TBC1D25 | 458  | 529  | 8.28016290261 |
| NM_002536    | TBC1D25 | 1310 | 1366 | 9.280336417   |
| NM_002536    | TBC1D25 | 1707 | 1756 | 8.28016290261 |
| NM_001144000 | AGAP5   | 2072 | 2137 | 9.4085843011  |
| NM_001144000 | AGAP5   | 374  | 465  | 7.81961093126 |
| NM_001144001 | SEC14L1 | 3071 | 3114 | 4.61133602309 |
| NM_001144001 | SEC14L1 | 432  | 502  | 5.69547523226 |
| NM_001144001 | SEC14L1 | 193  | 287  | 7.01740332737 |
| NM_001144001 | SEC14L1 | 1410 | 1458 | 5.69145763231 |
| NM_001144001 | SEC14L1 | 2539 | 2574 | 4.61133602309 |
| NM_001144001 | SEC14L1 | 1720 | 1809 | 4.69530148216 |
| NM_015004    | EXOSC7  | 420  | 465  | 4.14241557286 |
| NM_003337    | UBE2B   | 740  | 779  | 6.53041497263 |
| NM_003337    | UBE2B   | 829  | 894  | 7.53041497263 |
| NM_003337    | UBE2B   | 573  | 619  | 5.4462757708  |
| NM_015001    | SPEN    | 1212 | 1244 | 5.805468321   |

|              |        |       |       |               |
|--------------|--------|-------|-------|---------------|
| NM_015001    | SPEN   | 7611  | 7686  | 5.805468321   |
| NM_015001    | SPEN   | 8042  | 8098  | 7.39043082172 |
| NM_015001    | SPEN   | 12061 | 12123 | 5.80162447115 |
| NM_015001    | SPEN   | 11725 | 11767 | 5.72150286194 |
| NM_015001    | SPEN   | 5422  | 5476  | 6.80563534027 |
| NM_015001    | SPEN   | 4516  | 4559  | 5.72150286194 |
| NM_015001    | SPEN   | 2755  | 2796  | 5.805468321   |
| NM_015001    | SPEN   | 8851  | 8928  | 8.39060457182 |
| NM_015001    | SPEN   | 3391  | 3430  | 6.805468321   |
| NM_015001    | SPEN   | 6986  | 7042  | 7.80564207131 |
| NM_015001    | SPEN   | 7740  | 7799  | 5.805468321   |
| NM_015001    | SPEN   | 4178  | 4266  | 8.12757016621 |
| NM_015001    | SPEN   | 4302  | 4357  | 5.80564207132 |
| NM_015001    | SPEN   | 8184  | 8224  | 6.80162447115 |
| NM_015001    | SPEN   | 7442  | 7495  | 5.80162447115 |
| NM_015001    | SPEN   | 4848  | 4925  | 7.39043082172 |
| NM_015001    | SPEN   | 3967  | 4009  | 6.72150286194 |
| NM_015001    | SPEN   | 3448  | 3511  | 5.72150286194 |
| NM_015001    | SPEN   | 4626  | 4766  | 8.80564207132 |
| NM_015001    | SPEN   | 1995  | 2164  | 6.80564207132 |
| NM_015001    | SPEN   | 2220  | 2344  | 7.39060457204 |
| NM_015001    | SPEN   | 11956 | 12051 | 7.39060433612 |
| NM_015001    | SPEN   | 3601  | 3692  | 5.80162447115 |
| NM_015001    | SPEN   | 4569  | 4619  | 7.39060433612 |
| NM_015001    | SPEN   | 5155  | 5248  | 6.8056420711  |
| NM_015001    | SPEN   | 6611  | 6687  | 5.80563534027 |
| NM_015001    | SPEN   | 616   | 711   | 5.80564207132 |
| NM_015001    | SPEN   | 9230  | 9300  | 5.80564206377 |
| NM_015001    | SPEN   | 1665  | 1842  | 7.39060457204 |
| NM_015001    | SPEN   | 5039  | 5154  | 7.39043082172 |
| NM_015001    | SPEN   | 11574 | 11682 | 6.80564207132 |
| NM_015000    | STK38L | 1419  | 1456  | 6.13504827759 |
| NM_001037536 | SCML1  | 298   | 346   | 5.50396032562 |
| NM_001037536 | SCML1  | 2208  | 2277  | 4.50797768988 |
| NM_001128916 | TOMM40 | 974   | 1032  | 6.90704536098 |
| NM_001128916 | TOMM40 | 533   | 594   | 6.91106296114 |
| NM_001128916 | TOMM40 | 245   | 301   | 6.24196125104 |
| NM_001128916 | TOMM40 | 1169  | 1214  | 6.91106296114 |
| NM_001128916 | TOMM40 | 933   | 972   | 6.91088921083 |
| NM_001128916 | TOMM40 | 650   | 782   | 7.32610046043 |
| NM_001128916 | TOMM40 | 1038  | 1150  | 7.64802855532 |
| NM_001128916 | TOMM40 | 808   | 919   | 6.91106296115 |
| NM_001128916 | TOMM40 | 1310  | 1392  | 7.64802855532 |
| NM_001128916 | TOMM40 | 438   | 521   | 6.32610046043 |
| NM_001128916 | TOMM40 | 311   | 425   | 8.13345538249 |
| NM_001113482 | MANEAL | 1854  | 1969  | 9.35379303693 |
| NM_001113482 | MANEAL | 878   | 928   | 7.76865678589 |
| NM_001113482 | MANEAL | 1065  | 1128  | 7.76481293604 |
| NM_001113482 | MANEAL | 1218  | 1286  | 7.76865678589 |
| NM_173834    | YIPF6  | 626   | 677   | 9.98714109158 |

|              |          |      |      |                |               |
|--------------|----------|------|------|----------------|---------------|
| NM_173834    | YIPF6    | 1388 | 1438 | 9.398334741    |               |
| NM_173834    | YIPF6    | 748  | 880  | 11.4023523412  |               |
| NM_173834    | YIPF6    | 921  | 1006 | 9.9873148419   |               |
| NM_173834    | YIPF6    | 1821 | 1893 | 9.98731460598  |               |
| NM_017446    | MRPL39   | 437  | 484  | 5.91936180601  |               |
| NM_017446    | MRPL39   | 530  | 614  | 4.91936157764  |               |
| NM_025267    | AARSD1   | 1051 | 1153 | 6.56369773602  |               |
| NM_138555    | KIF23    | 1295 | 1363 | 5.94420057066  |               |
| NM_138555    | KIF23    | 1848 | 1935 | 4.94420057088  |               |
| NM_138555    | KIF23    | 468  | 519  | 5.94420057066  |               |
| NM_138555    | KIF23    | 1668 | 1707 | 6.52514547143  |               |
| NM_138555    | KIF23    | 971  | 1070 | 6.5291630716   |               |
| NM_138555    | KIF23    | 3452 | 3524 | 6.5291630716   |               |
| NM_138555    | KIF23    | 1957 | 2046 | 4.94420057066  |               |
| NM_138555    | KIF23    | 1166 | 1290 | 5.94420057088  |               |
| NM_138555    | KIF23    | 684  | 809  | 4.94420057088  |               |
| NM_138555    | KIF23    | 3551 | 3679 | 7.75155549294  |               |
| NM_138555    | KIF23    | 2977 | 3065 | 6.52916306406  |               |
| NM_138555    | KIF23    | 1429 | 1561 | 6.5291630716   |               |
| NM_138555    | KIF23    | 857  | 943  | 4.94419383983  |               |
| NM_138555    | KIF23    | 2894 | 2973 | 4.94420057088  |               |
| NM_138555    | KIF23    | 3129 | 3292 | 6.5291630716   |               |
| NM_033306    | CASP4    | 428  | 496  | 7.28706007477  |               |
| NM_033306    | CASP4    | 359  | 403  | 6.20292759644  |               |
| NM_033306    | CASP4    | 528  | 658  | 9.09442172788  |               |
| NM_033306    | CASP4    | 176  | 288  | 7.87202930654  |               |
| NM_033306    | CASP4    | 1116 | 1231 | 7.28706680582  |               |
| NM_033306    | CASP4    | 862  | 975  | 6.2870665699   |               |
| NM_199044    | NSUN4    | 2129 | 2171 | 8.57418058337  |               |
| NM_199044    | NSUN4    | 17   | 98   | 7.65831979276  |               |
| NM_199044    | NSUN4    | 927  | 972  | 8.65814604244  |               |
| NM_199044    | NSUN4    | 757  | 797  | 9.57418058337  |               |
| NM_199044    | NSUN4    | 804  | 832  | 9.24310854316  |               |
| NM_199044    | NSUN4    | 101  | 170  | 7.65831978521  |               |
| NM_001165416 | LDHA     | 581  | 631  | -1.31339339392 |               |
| NM_001165416 | LDHA     | 1455 | 1508 | 0.686606606081 |               |
| NM_001165416 | LDHA     | 1327 | 1447 | 1.68660660608  |               |
| NM_001165416 | LDHA     | 1563 | 1617 | 0.271569106802 |               |
| NM_001165416 | LDHA     | 1140 | 1302 | 2.14603822472  |               |
| NM_001165416 | LDHA     | 173  | 216  | -2.31741099409 |               |
| NM_001165416 | LDHA     | 639  | 810  | 1.59349720169  |               |
| NM_001165416 | LDHA     | 217  | 571  | 2.85653160752  |               |
| NM_001165416 | LDHA     | 817  | 1136 | 3.07892402886  |               |
| NM_001165417 | SLC25A11 |      | 930  | 994            | 6.62204737839 |
| NM_001165417 | SLC25A11 |      | 527  | 574            | 5.03307400855 |
| NM_001165417 | SLC25A11 |      | 833  | 928            | 6.62205410944 |
| NM_001165417 | SLC25A11 |      | 1240 | 1449           | 8.35901970361 |
| NM_001165412 | NFKB1    | 3579 | 3626 | 7.11758108203  |               |
| NM_001165412 | NFKB1    | 3661 | 3707 | 6.11740733172  |               |
| NM_001165412 | NFKB1    | 2139 | 2185 | 7.7025368517   |               |

|              |        |      |      |               |
|--------------|--------|------|------|---------------|
| NM_001165412 | NFKB1  | 2714 | 2776 | 8.11740733172 |
| NM_001165412 | NFKB1  | 1239 | 1312 | 6.11757435098 |
| NM_001165412 | NFKB1  | 1746 | 1804 | 6.11758107449 |
| NM_001165412 | NFKB1  | 2529 | 2599 | 6.11356348186 |
| NM_001165412 | NFKB1  | 2926 | 2977 | 7.11758108204 |
| NM_001165412 | NFKB1  | 2008 | 2053 | 6.11758084612 |
| NM_001165412 | NFKB1  | 819  | 898  | 8.11758108204 |
| NM_001165412 | NFKB1  | 1822 | 1852 | 7.11356348186 |
| NM_001165412 | NFKB1  | 901  | 1005 | 9.11758108204 |
| NM_001165412 | NFKB1  | 3270 | 3399 | 8.70254358276 |
| NM_001165412 | NFKB1  | 2232 | 2321 | 7.70254358276 |
| NM_001165412 | NFKB1  | 2978 | 3117 | 9.28750608348 |
| NM_017748    | CWC25  | 1816 | 1898 | 5.45913627481 |
| NM_017748    | CWC25  | 2571 | 2614 | 5.45914300586 |
| NM_017741    | DCAF16 | 1030 | 1086 | 9.63754311408 |
| NM_017741    | DCAF16 | 1122 | 1170 | 8.23147580981 |
| NM_017741    | DCAF16 | 1700 | 1760 | 8.31544126888 |
| NM_017741    | DCAF16 | 2850 | 2888 | 7.31159741902 |
| NM_017741    | DCAF16 | 874  | 956  | 9.31561501897 |
| NM_017741    | DCAF16 | 3960 | 3995 | 7.31159741902 |
| NM_017741    | DCAF16 | 2749 | 2820 | 7.31561501897 |
| NM_017741    | DCAF16 | 1829 | 1910 | 7.31561478328 |
| NM_017741    | DCAF16 | 3246 | 3351 | 8.3156150192  |
| NM_017741    | DCAF16 | 543  | 646  | 7.3156150192  |
| NM_017742    | ZCCHC2 | 2394 | 2431 | 5.76036577561 |
| NM_017742    | ZCCHC2 | 1654 | 1695 | 6.76036577561 |
| NM_017742    | ZCCHC2 | 1798 | 1875 | 8.0822938705  |
| NM_001024957 | BRMS1  | 269  | 343  | 7.37693335645 |
| NM_001024957 | BRMS1  | 918  | 1111 | 8.96189585739 |
| NM_001024957 | BRMS1  | 1278 | 1345 | 7.29279414729 |
| NM_001024957 | BRMS1  | 1136 | 1265 | 7.37693335667 |
| NM_001024957 | BRMS1  | 469  | 650  | 8.96189585739 |
| NM_001024957 | BRMS1  | 714  | 855  | 9.18428827873 |
| NM_001024956 | SC5DL  | 886  | 981  | 9.03013638438 |
| NM_001024956 | SC5DL  | 997  | 1060 | 7.03013638438 |
| NM_001024956 | SC5DL  | 743  | 885  | 9.48956800301 |
| NM_001024956 | SC5DL  | 6101 | 6168 | 5.0261187842  |
| NM_001024956 | SC5DL  | 6849 | 6917 | 6.6150988851  |
| NM_001024956 | SC5DL  | 1061 | 1182 | 8.6150988851  |
| NM_001024956 | SC5DL  | 1623 | 1696 | 5.03013638415 |
| NM_001024956 | SC5DL  | 4065 | 4104 | 5.94599717499 |
| NM_001024956 | SC5DL  | 1208 | 1450 | 9.55369834043 |
| NM_001024956 | SC5DL  | 482  | 703  | 10.1175992256 |
| NM_001024956 | SC5DL  | 1479 | 1615 | 8.03013638438 |
| NM_001024956 | SC5DL  | 208  | 481  | 10.0301363844 |
| NM_001024956 | SC5DL  | 2767 | 2833 | 5.0261187842  |
| NM_017746    | TEX10  | 1126 | 1182 | 7.89975271365 |
| NM_017746    | TEX10  | 1306 | 1385 | 6.98388519198 |
| NM_017746    | TEX10  | 2221 | 2292 | 8.56885442375 |
| NM_017746    | TEX10  | 2086 | 2189 | 7.98389192303 |

|              |          |      |      |                    |
|--------------|----------|------|------|--------------------|
| NM_017746    | TEX10    | 434  | 469  | 6.97987432286      |
| NM_017747    | ANKHD1   | 6416 | 6509 | 7.47707257598      |
| NM_017747    | ANKHD1   | 7482 | 7517 | 5.47305497581      |
| NM_017747    | ANKHD1   | 2983 | 3050 | 5.47706584493      |
| NM_017747    | ANKHD1   | 532  | 603  | 7.06203506915      |
| NM_017747    | ANKHD1   | 7024 | 7083 | 6.47707257598      |
| NM_017747    | ANKHD1   | 1883 | 1952 | 7.06186132638      |
| NM_017747    | ANKHD1   | 6916 | 6954 | 5.3929333666       |
| NM_017747    | ANKHD1   | 1191 | 1271 | 7.47707256843      |
| NM_017747    | ANKHD1   | 1067 | 1136 | 7.06203484078      |
| NM_017747    | ANKHD1   | 3111 | 3160 | 7.06203484078      |
| NM_017747    | ANKHD1   | 3594 | 3688 | 6.47707256843      |
| NM_017747    | ANKHD1   | 4342 | 4384 | 5.47305497581      |
| NM_017747    | ANKHD1   | 793  | 891  | 7.06203507648      |
| NM_017747    | ANKHD1   | 3694 | 3769 | 6.47706584493      |
| NM_017747    | ANKHD1   | 2441 | 2536 | 6.47707256843      |
| NM_017747    | ANKHD1   | 6079 | 6189 | 5.47707257598      |
| NM_017747    | ANKHD1   | 6770 | 6871 | 6.47707257576      |
| NM_017747    | ANKHD1   | 1380 | 1523 | 8.0620350767       |
| NM_017747    | ANKHD1   | 3330 | 3409 | 7.06203484078      |
| NM_017747    | ANKHD1   | 1578 | 1717 | 6.47707257598      |
| NM_017747    | ANKHD1   | 2192 | 2273 | 5.47707234006      |
| NM_017747    | ANKHD1   | 5879 | 6029 | 6.47707257598      |
| NM_001002877 | THOC5    | 2258 | 2339 | 4.92877130309      |
| NM_001002877 | THOC5    | 662  | 711  | 5.51757765367      |
| NM_001002877 | THOC5    | 1764 | 1818 | 4.92877130309      |
| NM_001002877 | THOC5    | 2079 | 2128 | 5.4336121946       |
| NM_001002877 | THOC5    | 1429 | 1512 | 4.93278890326      |
| NM_001002877 | THOC5    | 1672 | 1737 | 3.93278866734      |
| NM_001002877 | THOC5    | 1037 | 1161 | 6.25471699815      |
| NM_001042631 | SDHAF1   | 808  | 875  | 10.3168278092      |
| NM_001025603 | RFX5     | 3218 | 3279 | 10.4303497273      |
| NM_001025603 | RFX5     | 540  | 594  | 10.0153054972      |
| NM_001025603 | RFX5     | 1079 | 1152 | 10.0153054972      |
| NM_001025603 | RFX5     | 2270 | 2343 | 9.43017597725      |
| NM_001025603 | RFX5     | 84   | 168  | 8.4263321274       |
| NM_001025603 | RFX5     | 2150 | 2250 | 9.43034972756      |
| NM_001114135 | EPB49    | 354  | 407  | 5.36654825593      |
| NM_001114135 | EPB49    | 1357 | 1465 | 6.95168450697      |
| NM_001135575 | C6orf228 |      | 4171 | 4222 8.20388992909 |
| NM_001135575 | C6orf228 |      | 596  | 663 8.19987233646  |
| NM_001135575 | C6orf228 |      | 4534 | 4592 7.11975072725 |
| NM_001135575 | C6orf228 |      | 278  | 355 9.20388993641  |
| NM_016299    | HSPA14   | 1559 | 1595 | 7.07127365415      |
| NM_016299    | HSPA14   | 355  | 460  | 8.15541286331      |
| NM_001013660 | FRRS1    | 1101 | 1157 | 5.9436960657       |
| NM_001013660 | FRRS1    | 685  | 749  | 7.94369607325      |
| NM_001013660 | FRRS1    | 582  | 648  | 8.52865857397      |
| NM_001013660 | FRRS1    | 22   | 79   | 5.94369607325      |
| NM_001013660 | FRRS1    | 2082 | 2354 | 10.528658574       |

|              |         |      |      |               |
|--------------|---------|------|------|---------------|
| NM_001013660 | FRRS1   | 1580 | 1770 | 10.1136210747 |
| NM_001013660 | FRRS1   | 499  | 530  | 6.85955686387 |
| NM_001013660 | FRRS1   | 1168 | 1273 | 8.52865857397 |
| NM_001013660 | FRRS1   | 2392 | 2520 | 9.64413579139 |
| NM_001013660 | FRRS1   | 325  | 384  | 5.9436893422  |
| NM_001013660 | FRRS1   | 1329 | 1537 | 9.64413579139 |
| NM_001013660 | FRRS1   | 750  | 922  | 9.94369607325 |
| NM_001013660 | FRRS1   | 1841 | 2074 | 10.336013496  |
| NM_033023    | PDGFA   | 838  | 887  | 10.3011556723 |
| NM_033023    | PDGFA   | 1559 | 1650 | 11.8899620229 |
| NM_033023    | PDGFA   | 1783 | 1857 | 11.8901290421 |
| NM_033023    | PDGFA   | 1469 | 1545 | 11.3049995222 |
| NM_016297    | PCY0X1  | 2278 | 2325 | 3.46181424152 |
| NM_016297    | PCY0X1  | 5033 | 5098 | 5.04677674979 |
| NM_016297    | PCY0X1  | 1819 | 1870 | 4.46181424907 |
| NM_016297    | PCY0X1  | 2974 | 3022 | 4.37767503969 |
| NM_016297    | PCY0X1  | 4418 | 4501 | 4.96263754041 |
| NM_016297    | PCY0X1  | 1712 | 1766 | 3.46164049876 |
| NM_016297    | PCY0X1  | 2798 | 2905 | 5.04677674979 |
| NM_016297    | PCY0X1  | 44   | 163  | 3.46181424907 |
| NM_016297    | PCY0X1  | 163  | 265  | 7.04677674979 |
| NM_016297    | PCY0X1  | 4905 | 4932 | 3.4577966489  |
| NM_016297    | PCY0X1  | 3312 | 3395 | 4.46181424152 |
| NM_016297    | PCY0X1  | 1491 | 1674 | 7.26916917113 |
| NM_016297    | PCY0X1  | 1171 | 1450 | 8.59109726602 |
| NM_016297    | PCY0X1  | 314  | 582  | 8.6712676147  |
| NM_016297    | PCY0X1  | 4023 | 4091 | 3.46180751802 |
| NM_016297    | PCY0X1  | 624  | 1075 | 9.3197952442  |
| NM_016297    | PCY0X1  | 1081 | 1167 | 6.46181424907 |
| NM_016297    | PCY0X1  | 5146 | 5325 | 5.46181424907 |
| NM_016297    | PCY0X1  | 1993 | 2140 | 5.46181424907 |
| NM_016297    | PCY0X1  | 4741 | 4814 | 4.46180751802 |
| NM_016292    | TRAP1   | 1157 | 1201 | 4.6659014246  |
| NM_016292    | TRAP1   | 234  | 313  | 4.08094565493 |
| NM_016292    | TRAP1   | 170  | 205  | 3.99680644555 |
| NM_016292    | TRAP1   | 628  | 697  | 3.08094565493 |
| NM_016292    | TRAP1   | 1699 | 1774 | 4.66590815566 |
| NM_016292    | TRAP1   | 1232 | 1308 | 4.66189055548 |
| NM_016292    | TRAP1   | 2107 | 2152 | 4.66573440534 |
| NM_016292    | TRAP1   | 773  | 883  | 5.40287374982 |
| NM_016292    | TRAP1   | 347  | 495  | 5.40287374982 |
| NM_016292    | TRAP1   | 952  | 1016 | 4.07692805476 |
| NM_016292    | TRAP1   | 1317 | 1453 | 5.40287374982 |
| NM_017528    | WBSCR22 | 403  | 571  | 9.94508821598 |
| NM_017528    | WBSCR22 | 80   | 209  | 8.85762537473 |
| NM_017528    | WBSCR22 | 211  | 365  | 9.85762537473 |
| NM_017528    | WBSCR22 | 997  | 1062 | 7.85745162441 |
| NM_017528    | WBSCR22 | 596  | 643  | 6.77348616535 |
| NM_017528    | WBSCR22 | 649  | 756  | 8.44258787545 |
| NM_017528    | WBSCR22 | 899  | 978  | 7.85762537473 |

|           |          |      |      |               |               |
|-----------|----------|------|------|---------------|---------------|
| NM_017528 | WBSCR22  | 1106 | 1199 | 5.85762537473 |               |
| NM_032102 | SRSF8    | 398  | 427  | 7.43218755984 |               |
| NM_017525 | CDC42BPG |      | 2409 | 12.3465678894 |               |
| NM_017525 | CDC42BPG |      | 3987 | 4034          | 11.7575880244 |
| NM_017525 | CDC42BPG |      | 2993 | 3055          | 10.7616056244 |
| NM_017525 | CDC42BPG |      | 1078 | 1149          | 10.7575880244 |
| NM_017525 | CDC42BPG |      | 201  | 250           | 10.7575880244 |
| NM_017525 | CDC42BPG |      | 660  | 742           | 10.7575880244 |
| NM_017520 | MPHOSPH8 |      | 2293 | 2377          | 5.59654825379 |
| NM_017520 | MPHOSPH8 |      | 2711 | 2761          | 4.927620294   |
| NM_017520 | MPHOSPH8 |      | 2482 | 2532          | 4.00774190321 |
| NM_152416 | C8orf38  | 324  | 385  | 7.23092077272 |               |
| NM_173165 | NFATC3   | 2872 | 2947 | 7.08887705898 |               |
| NM_173165 | NFATC3   | 3866 | 3908 | 6.49989695809 |               |
| NM_173165 | NFATC3   | 507  | 560  | 7.50391455826 |               |
| NM_173165 | NFATC3   | 4371 | 4413 | 5.41977534888 |               |
| NM_173165 | NFATC3   | 2057 | 2134 | 6.50391455071 |               |
| NM_173165 | NFATC3   | 806  | 871  | 5.41977534888 |               |
| NM_173165 | NFATC3   | 2135 | 2195 | 6.49989695809 |               |
| NM_173165 | NFATC3   | 1287 | 1338 | 6.49989695809 |               |
| NM_173165 | NFATC3   | 1636 | 1709 | 5.41977534888 |               |
| NM_173694 | ATP11C   | 1438 | 1504 | 6.46038462268 |               |
| NM_173694 | ATP11C   | 531  | 645  | 8.04534735177 |               |
| NM_173694 | ATP11C   | 2646 | 2701 | 8.45636725843 |               |
| NM_173694 | ATP11C   | 2855 | 2899 | 6.45636725843 |               |
| NM_173694 | ATP11C   | 1176 | 1229 | 6.46021110828 |               |
| NM_173694 | ATP11C   | 2971 | 3040 | 6.45636725843 |               |
| NM_004371 | COPA     | 1028 | 1127 | 6.36253745741 |               |
| NM_004371 | COPA     | 1439 | 1498 | 4.77757495669 |               |
| NM_004371 | COPA     | 4266 | 4354 | 5.51454055085 |               |
| NM_004371 | COPA     | 3343 | 3420 | 4.19261245597 |               |
| NM_004371 | COPA     | 1260 | 1302 | 4.77757495669 |               |
| NM_004371 | COPA     | 367  | 415  | 5.19261245596 |               |
| NM_004371 | COPA     | 4141 | 4226 | 5.99996737802 |               |
| NM_004371 | COPA     | 2811 | 2933 | 5.99996737802 |               |
| NM_004371 | COPA     | 4556 | 4615 | 4.77757472077 |               |
| NM_004371 | COPA     | 3278 | 3318 | 3.10847324658 |               |
| NM_004371 | COPA     | 2933 | 3044 | 6.19261245597 |               |
| NM_004371 | COPA     | 445  | 487  | 4.18859485579 |               |
| NM_004371 | COPA     | 1377 | 1434 | 5.51454055085 |               |
| NM_004371 | COPA     | 1322 | 1368 | 5.19261245574 |               |
| NM_004371 | COPA     | 3507 | 3557 | 3.19261244842 |               |
| NM_004371 | COPA     | 1554 | 1620 | 4.77757495669 |               |
| NM_004371 | COPA     | 2027 | 2118 | 5.99996737802 |               |
| NM_004371 | COPA     | 3432 | 3489 | 4.18859485579 |               |
| NM_004371 | COPA     | 1623 | 1737 | 5.51454055085 |               |
| NM_004371 | COPA     | 1181 | 1253 | 4.77757495669 |               |
| NM_004371 | COPA     | 676  | 799  | 6.19261245597 |               |
| NM_004371 | COPA     | 556  | 665  | 5.99996737802 |               |
| NM_004371 | COPA     | 3558 | 3656 | 5.99996737802 |               |



|              |              |      |      |               |               |
|--------------|--------------|------|------|---------------|---------------|
| NM_004371    | COPA         | 1743 | 2007 | 7.36253745741 |               |
| NM_004371    | COPA         | 802  | 1024 | 6.89305217411 |               |
| NM_004371    | COPA         | 2243 | 2749 | 8.05059345109 |               |
| NM_004371    | COPA         | 3660 | 3712 | 3.18859485579 |               |
| NM_004371    | COPA         | 3758 | 3854 | 4.77757495669 |               |
| NM_004371    | COPA         | 3980 | 4096 | 5.19261245597 |               |
| NM_004371    | COPA         | 504  | 548  | 4.19260572491 |               |
| NM_004371    | COPA         | 3123 | 3259 | 6.19261245597 |               |
| NM_004373    | COX6A1       | 30   | 87   | 6.53180856439 |               |
| NM_004373    | COX6A1       | 254  | 537  | 7.81191648359 |               |
| NM_004373    | COX6A1       | 103  | 252  | 5.89437864378 |               |
| NM_004375    | COX11        | 1571 | 1623 | 5.08332413657 |               |
| NM_004375    | COX11        | 402  | 456  | 5.66828663751 |               |
| NM_004375    | COX11        | 1108 | 1146 | 3.99918492741 |               |
| NM_004375    | COX11        | 510  | 659  | 6.40525223168 |               |
| NM_004374    | COX6C        | 573  | 746  | 3.42641936784 |               |
| NM_004374    | COX6C        | 460  | 568  | 3.71592598503 |               |
| NM_004374    | COX6C        | 349  | 424  | 1.84145686712 |               |
| XM_003118753 | LOC100507656 |      | 2670 | 2753          | 12.0857325017 |
| NM_001131007 | KIAA0922     |      | 2357 | 2411          | 10.0289778546 |
| NM_001131007 | KIAA0922     |      | 2526 | 2620          | 8.44418237319 |
| NM_001131007 | KIAA0922     |      | 2167 | 2231          | 9.44418909669 |
| NM_001131007 | KIAA0922     |      | 2430 | 2464          | 9.36004989486 |
| NM_001131007 | KIAA0922     |      | 1615 | 1735          | 11.029151605  |
| NM_001131007 | KIAA0922     |      | 3738 | 3868          | 10.7661171991 |
| NM_001131007 | KIAA0922     |      | 3916 | 3993          | 10.444189104  |
| NM_001131007 | KIAA0922     |      | 1355 | 1428          | 9.44418910424 |
| NM_001131007 | KIAA0922     |      | 1246 | 1316          | 8.44418237319 |
| NM_001195518 | MICU1        | 252  | 340  | 5.98434905973 |               |
| NM_001195518 | MICU1        | 857  | 927  | 6.56931156045 |               |
| NM_001195518 | MICU1        | 2313 | 2338 | 3.90020985034 |               |
| NM_001195518 | MICU1        | 181  | 251  | 6.30627715462 |               |
| NM_001195518 | MICU1        | 1015 | 1070 | 5.98434905972 |               |
| NM_001195518 | MICU1        | 2272 | 2313 | 4.98434905218 |               |
| NM_001195518 | MICU1        | 2130 | 2175 | 3.98434232867 |               |
| NM_001195518 | MICU1        | 1081 | 1160 | 5.98434905972 |               |
| NM_001195518 | MICU1        | 2219 | 2259 | 3.98417530941 |               |
| NM_001195518 | MICU1        | 763  | 838  | 6.30627715461 |               |
| NM_001195518 | MICU1        | 1249 | 1290 | 4.98434232867 |               |
| NM_001195518 | MICU1        | 375  | 537  | 6.79170398179 |               |
| NM_001195518 | MICU1        | 1295 | 1540 | 7.44378067837 |               |
| NM_001195518 | MICU1        | 1729 | 1857 | 5.98434905973 |               |
| NM_144563    | RPIA         | 581  | 656  | 7.82646672161 |               |
| NM_144563    | RPIA         | 358  | 433  | 6.24149749739 |               |
| NM_198391    | FLRT3        | 222  | 294  | 11.3286807853 |               |
| NM_198391    | FLRT3        | 2495 | 2587 | 10.8141076125 |               |
| NM_198391    | FLRT3        | 3603 | 3646 | 9.0067459594  |               |
| NM_198391    | FLRT3        | 1080 | 1168 | 10.0067526905 |               |
| NM_198391    | FLRT3        | 3794 | 3827 | 9.00273509028 |               |
| NM_198391    | FLRT3        | 1184 | 1260 | 9.59171519118 |               |

|           |         |      |      |               |
|-----------|---------|------|------|---------------|
| NM_198391 | FLRT3   | 360  | 436  | 10.5917151912 |
| NM_198391 | FLRT3   | 2347 | 2488 | 11.3286807853 |
| NM_198391 | FLRT3   | 3057 | 3150 | 9.59171495526 |
| NM_198391 | FLRT3   | 3886 | 3932 | 10.0027350903 |
| NM_198391 | FLRT3   | 25   | 199  | 11.7071924086 |
| NM_198391 | FLRT3   | 3001 | 3043 | 9.50757598179 |
| NM_198391 | FLRT3   | 437  | 711  | 12.8647336856 |
| NM_198391 | FLRT3   | 1950 | 2135 | 12.4661843091 |
| NM_198391 | FLRT3   | 965  | 1069 | 11.5917151912 |
| NM_198391 | FLRT3   | 2142 | 2334 | 12.3286807853 |
| NM_198391 | FLRT3   | 1628 | 1947 | 12.9136432861 |
| NM_198391 | FLRT3   | 2682 | 2859 | 11.5917151912 |
| NM_198391 | FLRT3   | 1297 | 1607 | 13.1360357074 |
| NM_198391 | FLRT3   | 839  | 948  | 10.0067526905 |
| NM_198391 | FLRT3   | 717  | 773  | 9.59171519118 |
| NM_000709 | BCKDHA  | 298  | 365  | 8.07034837903 |
| NM_000709 | BCKDHA  | 171  | 269  | 8.07034837903 |
| NM_000709 | BCKDHA  | 515  | 587  | 6.48521212799 |
| NM_000709 | BCKDHA  | 800  | 885  | 6.48537914726 |
| NM_144564 | SLC39A3 | 590  | 671  | 10.2283576754 |
| NM_144564 | SLC39A3 | 516  | 581  | 11.0357125975 |
| NM_144564 | SLC39A3 | 403  | 480  | 10.8133201761 |
| NM_144564 | SLC39A3 | 775  | 837  | 8.22835743951 |
| NM_144564 | SLC39A3 | 107  | 237  | 11.5502857703 |
| NM_144564 | SLC39A3 | 264  | 402  | 11.3982826769 |
| NM_144564 | SLC39A3 | 1330 | 1395 | 8.22835094437 |
| NM_000254 | MTR     | 2293 | 2328 | 7.46366685562 |
| NM_000254 | MTR     | 4200 | 4244 | 7.38354524641 |
| NM_000254 | MTR     | 1517 | 1561 | 7.46751070547 |
| NM_000254 | MTR     | 1757 | 1801 | 6.46751070547 |
| NM_000254 | MTR     | 5191 | 5257 | 6.46768445557 |
| NM_000254 | MTR     | 38   | 101  | 6.46767772474 |
| NM_000255 | MUT     | 482  | 540  | 5.97902719887 |
| NM_000255 | MUT     | 601  | 679  | 5.9790269705  |
| NM_000255 | MUT     | 3201 | 3290 | 5.56398969959 |
| NM_000255 | MUT     | 1901 | 1952 | 5.97902719887 |
| NM_000255 | MUT     | 687  | 842  | 6.56398970714 |
| NM_000255 | MUT     | 2171 | 2279 | 6.78638212847 |
| NM_000255 | MUT     | 1804 | 1883 | 3.97902720641 |
| NM_000255 | MUT     | 1653 | 1756 | 6.56398970714 |
| NM_000255 | MUT     | 2297 | 2537 | 7.78638212847 |
| NM_000255 | MUT     | 3113 | 3181 | 3.97500960624 |
| NM_000255 | MUT     | 1990 | 2155 | 6.56398970714 |
| NM_000255 | MUT     | 1092 | 1544 | 8.56398970714 |
| NM_000255 | MUT     | 2747 | 2822 | 3.97902719887 |
| NM_000253 | MTTP    | 1312 | 1407 | 5.91334225638 |
| NM_000253 | MTTP    | 2242 | 2304 | 4.10598733433 |
| NM_000253 | MTTP    | 2839 | 2907 | 5.10598733433 |
| NM_000253 | MTTP    | 1252 | 1300 | 5.10598060327 |
| NM_000253 | MTTP    | 1899 | 1972 | 5.10598733433 |

|           |      |      |      |               |
|-----------|------|------|------|---------------|
| NM_000253 | MTTP | 930  | 1046 | 5.42791542921 |
| NM_000253 | MTTP | 723  | 800  | 5.42791542921 |
| NM_000253 | MTTP | 1772 | 1896 | 6.10598733433 |
| NM_000253 | MTTP | 2731 | 2773 | 4.60681062566 |
| NM_000253 | MTTP | 564  | 614  | 4.02184812494 |
| NM_000253 | MTTP | 2542 | 2609 | 4.10598732678 |
| NM_000253 | MTTP | 2108 | 2229 | 5.69094983505 |
| NM_000253 | MTTP | 2330 | 2503 | 7.27591233577 |
| NM_000253 | MTTP | 1102 | 1247 | 5.10598733432 |
| NM_000253 | MTTP | 221  | 400  | 7.4983047571  |
| NM_000253 | MTTP | 2014 | 2104 | 5.42791542921 |
| NM_000253 | MTTP | 2618 | 2701 | 4.68693223487 |
| NM_000253 | MTTP | 402  | 492  | 4.69077608473 |
| NM_000253 | MTTP | 2918 | 3031 | 5.91334225638 |
| NM_000253 | MTTP | 1460 | 1692 | 6.10598733433 |
| NM_000253 | MTTP | 495  | 562  | 4.68693223487 |
| NM_000251 | MSH2 | 2576 | 2636 | 4.66952849281 |
| NM_000251 | MSH2 | 1724 | 1787 | 6.25466474385 |
| NM_000251 | MSH2 | 1133 | 1233 | 4.66970224313 |
| NM_000251 | MSH2 | 1863 | 1950 | 6.66970223558 |
| NM_000251 | MSH2 | 2061 | 2117 | 4.66970224313 |
| NM_000251 | MSH2 | 2147 | 2225 | 6.66970224313 |
| NM_000251 | MSH2 | 973  | 1077 | 7.83962724457 |
| NM_000251 | MSH2 | 1609 | 1714 | 4.66970223558 |
| NM_000251 | MSH2 | 931  | 972  | 6.25465801279 |
| NM_000251 | MSH2 | 1414 | 1556 | 8.66970224313 |
| NM_000251 | MSH2 | 2356 | 2441 | 7.25466474385 |
| NM_000251 | MSH2 | 819  | 906  | 4.66970224312 |
| NM_000251 | MSH2 | 2643 | 2744 | 6.25466474385 |
| NM_000251 | MSH2 | 597  | 816  | 6.66970224313 |
| NM_000251 | MSH2 | 309  | 395  | 6.99163033801 |
| NM_000251 | MSH2 | 3069 | 3201 | 6.25466474385 |
| NM_000251 | MSH2 | 1247 | 1413 | 7.66970224313 |
| NM_000251 | MSH2 | 2231 | 2347 | 6.99163033801 |
| NM_000251 | MSH2 | 398  | 457  | 4.66568464295 |
| NM_003473 | STAM | 1629 | 1726 | 7.02269324604 |
| NM_003473 | STAM | 1921 | 1992 | 6.02251949572 |
| NM_003473 | STAM | 988  | 1117 | 7.02269324604 |
| NM_003473 | STAM | 1257 | 1312 | 6.02268651499 |
| NM_003473 | STAM | 2103 | 2158 | 5.02251949572 |
| NM_003473 | STAM | 224  | 338  | 5.02269324582 |
| NM_003473 | STAM | 99   | 176  | 7.34462134092 |
| NM_003472 | DEK  | 2348 | 2427 | 4.70100843431 |
| NM_003472 | DEK  | 1658 | 1727 | 4.11604593358 |
| NM_003472 | DEK  | 1540 | 1640 | 5.92340085564 |
| NM_003472 | DEK  | 704  | 740  | 5.11603920253 |
| NM_003472 | DEK  | 1958 | 2021 | 4.70100843431 |
| NM_003472 | DEK  | 468  | 534  | 5.43797402847 |
| NM_003472 | DEK  | 1800 | 1855 | 4.11603920253 |
| NM_003472 | DEK  | 1255 | 1381 | 4.70100843431 |

|           |        |      |      |               |
|-----------|--------|------|------|---------------|
| NM_003472 | DEK    | 2101 | 2285 | 5.92340085564 |
| NM_003472 | DEK    | 1736 | 1787 | 4.61686922492 |
| NM_003472 | DEK    | 1409 | 1502 | 5.11604593358 |
| NM_003472 | DEK    | 2437 | 2561 | 4.70100843431 |
| NM_003472 | DEK    | 2701 | 2791 | 3.11604593358 |
| NM_003472 | DEK    | 768  | 857  | 3.11604593358 |
| NM_003472 | DEK    | 873  | 993  | 3.11604593358 |
| NM_006623 | PHGDH  | 1598 | 1659 | 2.58905727826 |
| NM_006623 | PHGDH  | 226  | 306  | 2.59307487843 |
| NM_006623 | PHGDH  | 1376 | 1417 | 3.50893566905 |
| NM_006623 | PHGDH  | 584  | 707  | 3.59307487843 |
| NM_006623 | PHGDH  | 349  | 445  | 3.59307487843 |
| NM_006623 | PHGDH  | 823  | 934  | 4.17803737915 |
| NM_003470 | USP7   | 676  | 736  | 2.16731505946 |
| NM_003470 | USP7   | 3344 | 3427 | 3.16732179051 |
| NM_003470 | USP7   | 2055 | 2138 | 4.16732179051 |
| NM_003470 | USP7   | 2402 | 2485 | 3.75228429124 |
| NM_003470 | USP7   | 528  | 581  | 2.16732179051 |
| NM_003470 | USP7   | 1931 | 2008 | 3.1673215546  |
| NM_003470 | USP7   | 2258 | 2364 | 4.16732179051 |
| NM_003470 | USP7   | 404  | 504  | 4.16732179051 |
| NM_003470 | USP7   | 288  | 361  | 3.16731505946 |
| NM_003470 | USP7   | 2600 | 2643 | 2.16330419034 |
| NM_003470 | USP7   | 1199 | 1357 | 4.97467671257 |
| NM_003470 | USP7   | 3607 | 3699 | 3.16732179051 |
| NM_003470 | USP7   | 1686 | 1774 | 2.1673215546  |
| NM_003477 | PDHX   | 1278 | 1336 | 3.89293752551 |
| NM_003477 | PDHX   | 795  | 834  | 4.80879832367 |
| NM_003477 | PDHX   | 941  | 980  | 4.80879832367 |
| NM_003477 | PDHX   | 1375 | 1483 | 6.21486562794 |
| NM_003477 | PDHX   | 1684 | 1728 | 3.88891993288 |
| NM_006627 | POP4   | 704  | 769  | 9.51708649359 |
| NM_006627 | POP4   | 424  | 482  | 9.10205548945 |
| NM_006627 | POP4   | 349  | 401  | 9.09803812519 |
| NM_006627 | POP4   | 641  | 690  | 9.10188197505 |
| NM_006627 | POP4   | 557  | 633  | 9.51307562447 |
| NM_006627 | POP4   | 41   | 110  | 7.43295401526 |
| NM_006154 | NEDD4  | 2499 | 2579 | 6.05747058415 |
| NM_006154 | NEDD4  | 5718 | 5776 | 6.6422593421  |
| NM_006154 | NEDD4  | 1581 | 1656 | 7.0574705917  |
| NM_006154 | NEDD4  | 3403 | 3469 | 5.05345299153 |
| NM_006154 | NEDD4  | 4544 | 4618 | 6.05746386065 |
| NM_006154 | NEDD4  | 2197 | 2250 | 6.64242636137 |
| NM_006154 | NEDD4  | 1261 | 1349 | 5.05746386065 |
| NM_006154 | NEDD4  | 2849 | 2943 | 7.05747058415 |
| NM_006154 | NEDD4  | 186  | 258  | 6.05747059148 |
| NM_006154 | NEDD4  | 4755 | 4820 | 6.6422593421  |
| NM_006154 | NEDD4  | 612  | 687  | 6.64243308487 |
| NM_006154 | NEDD4  | 1987 | 2155 | 7.64243309242 |
| NM_006628 | ARPP19 | 447  | 519  | 4.9623227534  |

|              |          |      |      |                    |
|--------------|----------|------|------|--------------------|
| NM_006628    | ARPP19   | 2934 | 2972 | 4.95830515323      |
| NM_006628    | ARPP19   | 4929 | 5003 | 3.96232274585      |
| NM_006628    | ARPP19   | 2803 | 2839 | 3.87818354401      |
| NM_006628    | ARPP19   | 4719 | 4782 | 4.9623227534       |
| NM_006628    | ARPP19   | 3518 | 3611 | 5.54728525411      |
| NM_006628    | ARPP19   | 4239 | 4317 | 3.96232251748      |
| NM_006628    | ARPP19   | 4801 | 4860 | 4.9623227534       |
| NM_006628    | ARPP19   | 4058 | 4151 | 3.9623227534       |
| NM_006628    | ARPP19   | 81   | 131  | 3.95830515323      |
| NM_006628    | ARPP19   | 540  | 693  | 7.42175437204      |
| NM_006628    | ARPP19   | 164  | 221  | 4.96232275339      |
| NM_006628    | ARPP19   | 1208 | 1267 | 3.95830515323      |
| NM_006628    | ARPP19   | 256  | 377  | 6.54728525412      |
| NM_006628    | ARPP19   | 3328 | 3374 | 5.46314604474      |
| NM_006628    | ARPP19   | 826  | 868  | 4.96214900308      |
| NM_006628    | ARPP19   | 2132 | 2260 | 5.54728525412      |
| NM_006628    | ARPP19   | 2622 | 2731 | 5.54728525412      |
| NM_006628    | ARPP19   | 1042 | 1197 | 5.54728525412      |
| NM_006628    | ARPP19   | 1876 | 1978 | 5.54728525412      |
| NM_006628    | ARPP19   | 898  | 1023 | 6.54728525412      |
| NM_006628    | ARPP19   | 2406 | 2460 | 5.54728524657      |
| NM_006628    | ARPP19   | 3021 | 3136 | 5.9623227534       |
| NM_006628    | ARPP19   | 4521 | 4612 | 3.95830515323      |
| NM_006628    | ARPP19   | 1528 | 1631 | 6.28425084829      |
| NM_003478    | CUL5     | 2285 | 2340 | 5.61415285561      |
| NM_001160046 | SGOL2    | 2138 | 2204 | 7.67362300749      |
| NM_001160046 | SGOL2    | 3204 | 3272 | 6.67362300749      |
| NM_001160046 | SGOL2    | 3563 | 3613 | 6.67379002676      |
| NM_001160046 | SGOL2    | 2051 | 2103 | 6.58965754843      |
| NM_001160046 | SGOL2    | 3692 | 3773 | 6.67379675781      |
| NM_001160046 | SGOL2    | 134  | 187  | 7.58965754843      |
| NM_001160046 | SGOL2    | 1143 | 1210 | 6.67379652189      |
| NM_148920    | PIGQ     | 151  | 207  | 10.79725335        |
| NM_148920    | PIGQ     | 1335 | 1444 | 11.7972535859      |
| NM_148920    | PIGQ     | 1450 | 1553 | 10.7972535859      |
| NM_148920    | PIGQ     | 1074 | 1132 | 11.3820423363      |
| NM_148920    | PIGQ     | 1563 | 1657 | 10.7972535859      |
| NM_001128617 | REPS1    | 844  | 906  | 8.17036677758      |
| NM_207380    | C15orf52 |      | 5174 | 5207 10.7478868044 |
| NM_207380    | C15orf52 |      | 4008 | 4093 10.6639213453 |
| NM_207380    | C15orf52 |      | 2565 | 2608 10.7480538236 |
| NM_207380    | C15orf52 |      | 5084 | 5159 12.7480605547 |
| NM_207380    | C15orf52 |      | 3367 | 3425 10.7478868044 |
| NM_001128610 | USP8     | 2475 | 2514 | 4.31430468347      |
| NM_001128610 | USP8     | 481  | 567  | 5.39844388531      |
| NM_001128610 | USP8     | 1093 | 1219 | 5.3984371618       |
| NM_025045    | BAIAP2L2 |      | 1259 | 1307 6.83968753835 |
| NM_025045    | BAIAP2L2 |      | 452  | 499 6.75554856488  |
| NM_001199174 | MLST8    | 1349 | 1389 | 5.19488299276      |
| NM_001199174 | MLST8    | 908  | 1011 | 5.19488972381      |

|              |           |      |      |               |               |
|--------------|-----------|------|------|---------------|---------------|
| NM_016434    | RTEL1     | 825  | 867  | 5.73475554646 |               |
| NM_016437    | TUBG2     | 1649 | 1699 | 4.75312847432 |               |
| NM_016437    | TUBG2     | 431  | 486  | 4.75313520538 |               |
| NM_016437    | TUBG2     | 826  | 947  | 5.75313520538 |               |
| NM_016437    | TUBG2     | 487  | 566  | 4.75313520538 |               |
| NM_016437    | TUBG2     | 985  | 1068 | 6.75313520538 |               |
| NM_016437    | TUBG2     | 1114 | 1184 | 6.3380977061  |               |
| NM_016437    | TUBG2     | 1490 | 1549 | 6.75313520538 |               |
| NM_016437    | TUBG2     | 277  | 339  | 6.33809747018 |               |
| NM_016437    | TUBG2     | 1365 | 1432 | 5.7491176052  |               |
| NM_001080472 | FITM2     | 68   | 130  | 5.28978658406 |               |
| NM_001080472 | FITM2     | 535  | 638  | 6.95888829417 |               |
| NM_001080472 | FITM2     | 668  | 765  | 7.37392579345 |               |
| NM_001080472 | FITM2     | 267  | 306  | 6.95888156311 |               |
| NM_001080472 | FITM2     | 388  | 477  | 5.3739257859  |               |
| NM_001080470 | ZNF697    | 2273 | 2328 | 8.3357495207  |               |
| NM_020701    | ISY1      | 322  | 375  | 6.19989060151 |               |
| NM_020701    | ISY1      | 662  | 729  | 7.19989732502 |               |
| NM_014783    | ARHGAP11A |      | 3833 | 3896          | 7.39047417631 |
| NM_014783    | ARHGAP11A |      | 1179 | 1231          | 8.97543667703 |
| NM_014783    | ARHGAP11A |      | 4631 | 4721          | 8.38645657613 |
| NM_014783    | ARHGAP11A |      | 4347 | 4382          | 7.30633496692 |
| NM_014783    | ARHGAP11A |      | 2242 | 2332          | 8.97543667703 |
| NM_014783    | ARHGAP11A |      | 1479 | 1528          | 8.39047416876 |
| NM_014783    | ARHGAP11A |      | 437  | 535           | 8.97543666948 |
| NM_014783    | ARHGAP11A |      | 3328 | 3409          | 9.97543667703 |
| NM_014783    | ARHGAP11A |      | 4187 | 4251          | 7.3904741763  |
| NM_001080479 | RGNEF     | 3691 | 3783 | 6.04262399468 |               |
| NM_001080479 | RGNEF     | 3371 | 3467 | 7.62357562628 |               |
| NM_001080479 | RGNEF     | 5722 | 5777 | 6.04245697542 |               |
| NM_001085468 | CTNND1    | 513  | 609  | 6.00129748919 |               |
| NM_001085468 | CTNND1    | 2788 | 2861 | 5.41633498847 |               |
| NM_001085468 | CTNND1    | 3842 | 3917 | 4.41633498847 |               |
| NM_001085468 | CTNND1    | 2665 | 2753 | 3.41633498847 |               |
| NM_001085468 | CTNND1    | 1187 | 1263 | 4.41633498847 |               |
| NM_001085468 | CTNND1    | 3743 | 3832 | 4.41633498846 |               |
| NM_001085468 | CTNND1    | 3034 | 3072 | 4.33219577909 |               |
| NM_001085468 | CTNND1    | 823  | 894  | 3.41633498847 |               |
| NM_001085468 | CTNND1    | 3660 | 3727 | 4.41633498825 |               |
| NM_001085468 | CTNND1    | 4457 | 4497 | 3.33219577909 |               |
| NM_001085468 | CTNND1    | 3112 | 3163 | 3.41616123815 |               |
| NM_001085468 | CTNND1    | 4706 | 4772 | 5.00129748919 |               |
| NM_001085468 | CTNND1    | 2520 | 2616 | 5.41633498847 |               |
| NM_001085468 | CTNND1    | 3962 | 4045 | 3.41633498847 |               |
| NM_001085468 | CTNND1    | 617  | 713  | 5.00129748919 |               |
| NM_001085468 | CTNND1    | 948  | 1125 | 7.00129748919 |               |
| NM_001085468 | CTNND1    | 2899 | 3022 | 6.58625998991 |               |
| NM_001085468 | CTNND1    | 2307 | 2461 | 6.58625998991 |               |
| NM_001085468 | CTNND1    | 1916 | 1991 | 3.41616123815 |               |
| NM_001085468 | CTNND1    | 4773 | 4921 | 5.41633498847 |               |

|              |        |      |      |               |
|--------------|--------|------|------|---------------|
| NM_001085468 | CTNND1 | 2128 | 2301 | 7.00129748919 |
| NM_001085468 | CTNND1 | 229  | 382  | 6.87576660711 |
| NM_001085468 | CTNND1 | 3309 | 3423 | 5.00129748919 |
| NM_001085468 | CTNND1 | 1267 | 1893 | 8.54561800541 |
| NM_001085468 | CTNND1 | 411  | 511  | 5.73826308336 |
| NM_001085468 | CTNND1 | 3485 | 3584 | 3.41633498846 |
| NM_001229    | CASP9  | 1979 | 2023 | 9.39728470278 |
| NM_001229    | CASP9  | 1629 | 1693 | 8.48125016185 |
| NM_001098272 | HMGCS1 | 3165 | 3237 | 1.82217943431 |
| NM_001098272 | HMGCS1 | 2523 | 2606 | 1.81816184168 |
| NM_001098272 | HMGCS1 | 2712 | 2737 | 2.82200569154 |
| NM_001098272 | HMGCS1 | 2782 | 2835 | 3.40696819226 |
| NM_001098272 | HMGCS1 | 2143 | 2212 | 2.82217920594 |
| NM_001098272 | HMGCS1 | 1703 | 1808 | 1.82217944186 |
| NM_001098272 | HMGCS1 | 2366 | 2462 | 3.82217944186 |
| NM_001098272 | HMGCS1 | 1259 | 1420 | 5.9921044433  |
| NM_001098272 | HMGCS1 | 982  | 1223 | 6.40714194258 |
| NM_001098272 | HMGCS1 | 3241 | 3387 | 2.82217944186 |
| NM_001098272 | HMGCS1 | 1438 | 1699 | 6.34574139791 |
| NM_001098272 | HMGCS1 | 103  | 603  | 7.17973144648 |
| NM_001098272 | HMGCS1 | 1841 | 2071 | 5.14410753675 |
| NM_001098272 | HMGCS1 | 2853 | 3109 | 4.62953436392 |
| NM_001098272 | HMGCS1 | 609  | 959  | 5.9921044433  |
| NM_001163424 | MYE0V2 | 251  | 401  | 5.86847376398 |
| NM_001163424 | MYE0V2 | 117  | 241  | 5.86847376398 |
| NM_000876    | IGF2R  | 858  | 940  | 6.02197140594 |
| NM_000876    | IGF2R  | 7788 | 7864 | 4.7995789846  |
| NM_000876    | IGF2R  | 1913 | 1983 | 6.02197140594 |
| NM_000876    | IGF2R  | 1821 | 1891 | 6.38454148532 |
| NM_000876    | IGF2R  | 8384 | 8410 | 3.21460975283 |
| NM_000876    | IGF2R  | 1339 | 1418 | 6.53654457877 |
| NM_000876    | IGF2R  | 5594 | 5642 | 3.21059888371 |
| NM_000876    | IGF2R  | 8600 | 8726 | 5.21461648388 |
| NM_000876    | IGF2R  | 506  | 644  | 6.67404810252 |
| NM_000876    | IGF2R  | 7879 | 7942 | 4.21461648388 |
| NM_000876    | IGF2R  | 7322 | 7444 | 5.21461648388 |
| NM_000876    | IGF2R  | 8136 | 8242 | 6.38454148532 |
| NM_000876    | IGF2R  | 6357 | 6554 | 7.96950398605 |
| NM_000876    | IGF2R  | 5644 | 5879 | 8.02197140594 |
| NM_000876    | IGF2R  | 2806 | 2853 | 3.21460975283 |
| NM_000876    | IGF2R  | 7976 | 8049 | 6.53654457877 |
| NM_000876    | IGF2R  | 8272 | 8380 | 6.53654457877 |
| NM_000876    | IGF2R  | 8429 | 8582 | 5.53654457877 |
| NM_000876    | IGF2R  | 4170 | 4415 | 7.91505620202 |
| NM_000876    | IGF2R  | 263  | 484  | 7.7995789846  |
| NM_000876    | IGF2R  | 6908 | 7080 | 6.7995789846  |
| NM_000876    | IGF2R  | 654  | 856  | 8.12150707949 |
| NM_000876    | IGF2R  | 208  | 258  | 3.21059888371 |
| NM_000876    | IGF2R  | 8994 | 9064 | 3.21461648388 |
| NM_000876    | IGF2R  | 2854 | 3555 | 9.78447209221 |

|              |        |       |       |               |
|--------------|--------|-------|-------|---------------|
| NM_000876    | IGF2R  | 1983  | 2395  | 8.76920533556 |
| NM_000876    | IGF2R  | 1420  | 1799  | 8.07259747901 |
| NM_000876    | IGF2R  | 6562  | 6904  | 8.5721684885  |
| NM_000876    | IGF2R  | 7476  | 7743  | 6.38454148532 |
| NM_000876    | IGF2R  | 4421  | 4772  | 7.91505620202 |
| NM_000876    | IGF2R  | 4773  | 5584  | 9.84397310396 |
| NM_000876    | IGF2R  | 2436  | 2806  | 8.21461648388 |
| NM_000876    | IGF2R  | 5887  | 6356  | 8.50001870274 |
| NM_000876    | IGF2R  | 3555  | 4169  | 9.19189640738 |
| NM_000876    | IGF2R  | 7152  | 7273  | 4.7995789846  |
| NM_000876    | IGF2R  | 946   | 1284  | 8.53654457877 |
| NM_000876    | IGF2R  | 8822  | 8994  | 7.53654457877 |
| NM_000875    | IGF1R  | 2879  | 2917  | 7.26738229865 |
| NM_000875    | IGF1R  | 4611  | 4653  | 7.34750390786 |
| NM_000875    | IGF1R  | 4093  | 4157  | 7.93246640858 |
| NM_000875    | IGF1R  | 932   | 965   | 6.35134775772 |
| NM_000875    | IGF1R  | 3393  | 3443  | 6.35134775772 |
| NM_000875    | IGF1R  | 2048  | 2111  | 9.15887643009 |
| NM_000875    | IGF1R  | 9205  | 9260  | 7.93648400853 |
| NM_000875    | IGF1R  | 3821  | 3878  | 7.93648400875 |
| NM_000875    | IGF1R  | 1283  | 1380  | 8.67344960292 |
| NM_000875    | IGF1R  | 2150  | 2183  | 8.34750390786 |
| NM_000875    | IGF1R  | 2917  | 2968  | 7.35152150048 |
| NM_000875    | IGF1R  | 3461  | 3524  | 6.35151477698 |
| NM_000875    | IGF1R  | 7695  | 7732  | 6.26738229865 |
| NM_000875    | IGF1R  | 1448  | 1538  | 8.67344960292 |
| NM_000875    | IGF1R  | 6514  | 6562  | 8.35152150781 |
| NM_000875    | IGF1R  | 5129  | 5174  | 6.26738229865 |
| NM_000875    | IGF1R  | 6383  | 6470  | 7.93648400875 |
| NM_000875    | IGF1R  | 10851 | 10906 | 6.34750390786 |
| NM_000875    | IGF1R  | 4743  | 4796  | 7.93246640858 |
| NM_000875    | IGF1R  | 3759  | 3795  | 6.35134775772 |
| NM_000875    | IGF1R  | 1841  | 1891  | 7.9364772777  |
| NM_000875    | IGF1R  | 8993  | 9046  | 7.35151477698 |
| NM_000875    | IGF1R  | 1806  | 1838  | 6.34750390786 |
| NM_000875    | IGF1R  | 5471  | 5541  | 6.34750390786 |
| NM_000875    | IGF1R  | 2680  | 2783  | 7.93648400875 |
| NM_000875    | IGF1R  | 9427  | 9480  | 6.34750390786 |
| NM_000875    | IGF1R  | 4275  | 4338  | 6.35152150048 |
| NM_000875    | IGF1R  | 3567  | 3622  | 6.35151477698 |
| NM_000875    | IGF1R  | 2524  | 2591  | 7.26738229865 |
| NM_000875    | IGF1R  | 1151  | 1265  | 7.35152150803 |
| NM_000875    | IGF1R  | 6269  | 6370  | 7.35152150803 |
| NM_000875    | IGF1R  | 1027  | 1091  | 6.34750390786 |
| NM_000875    | IGF1R  | 5660  | 5785  | 7.35152150803 |
| NM_001012754 | NHLRC3 | 829   | 886   | 8.25265621691 |
| NM_001012754 | NHLRC3 | 887   | 973   | 8.98962204699 |
| NM_001012754 | NHLRC3 | 426   | 500   | 8.66769371619 |
| NM_001012754 | NHLRC3 | 657   | 743   | 8.66769395211 |
| NM_001012754 | NHLRC3 | 1391  | 1419  | 6.58355474272 |



|              |         |      |      |               |
|--------------|---------|------|------|---------------|
| NM_001012754 | NHLRC3  | 1967 | 2059 | 6.66752020179 |
| NM_001012754 | NHLRC3  | 386  | 415  | 7.66768722105 |
| NM_001012756 | ZNF260  | 3451 | 3485 | 8.35952118049 |
| NM_001012752 | ABI1    | 889  | 959  | 7.45311854295 |
| NM_001012752 | ABI1    | 1485 | 1540 | 6.45311830703 |
| NM_001012752 | ABI1    | 1561 | 1628 | 6.45311854295 |
| NM_001012752 | ABI1    | 635  | 690  | 6.44910094278 |
| NM_001012752 | ABI1    | 286  | 343  | 6.36897933356 |
| NM_001012752 | ABI1    | 2042 | 2100 | 7.0340634435  |
| NM_001012752 | ABI1    | 1054 | 1168 | 7.03808104367 |
| NM_001012752 | ABI1    | 522  | 597  | 7.03807431262 |
| NM_002703    | PPAT    | 3057 | 3097 | 6.52136140228 |
| NM_002703    | PPAT    | 837  | 881  | 7.52152842154 |
| NM_002703    | PPAT    | 1490 | 1578 | 7.10649765332 |
| NM_002703    | PPAT    | 1198 | 1233 | 6.51751755242 |
| NM_002703    | PPAT    | 404  | 476  | 5.52153515259 |
| NM_002703    | PPAT    | 1100 | 1160 | 6.52153514505 |
| NM_002703    | PPAT    | 1248 | 1326 | 5.52153515237 |
| NM_002703    | PPAT    | 502  | 611  | 7.5215351526  |
| NM_002703    | PPAT    | 3339 | 3397 | 6.52152842154 |
| NM_002703    | PPAT    | 141  | 207  | 6.52153491668 |
| NM_002703    | PPAT    | 3606 | 3666 | 5.51751755242 |
| NM_002703    | PPAT    | 893  | 1100 | 8.5215351526  |
| NM_031488    | L3MBTL2 | 1515 | 1608 | 8.17112102768 |
| NM_031488    | L3MBTL2 | 2243 | 2319 | 10.1711277587 |
| NM_031488    | L3MBTL2 | 1378 | 1512 | 9.17112102768 |
| NM_002705    | PPL     | 797  | 841  | 7.3398943126  |
| NM_002705    | PPL     | 4740 | 4785 | 6.25592885353 |
| NM_002705    | PPL     | 289  | 343  | 7.33605046275 |
| NM_002705    | PPL     | 2337 | 2433 | 6.34006805537 |
| NM_002705    | PPL     | 1980 | 2037 | 6.33605046275 |
| NM_002705    | PPL     | 2662 | 2735 | 7.3398943126  |
| NM_002705    | PPL     | 6109 | 6200 | 7.34006806292 |
| NM_002705    | PPL     | 1726 | 1773 | 6.33605046275 |
| NM_002705    | PPL     | 509  | 575  | 7.3400680627  |
| NM_002705    | PPL     | 2507 | 2546 | 7.33605046275 |
| NM_002705    | PPL     | 6009 | 6048 | 7.33605046275 |
| NM_002705    | PPL     | 5491 | 5702 | 8.92503056364 |
| NM_002705    | PPL     | 1851 | 1922 | 7.33605046275 |
| NM_002705    | PPL     | 4859 | 4935 | 6.34006806292 |
| NM_002705    | PPL     | 5339 | 5399 | 6.34006805537 |
| NM_002705    | PPL     | 3786 | 3898 | 7.34006805537 |
| NM_002705    | PPL     | 1393 | 1487 | 7.92503032772 |
| NM_002705    | PPL     | 1075 | 1248 | 8.34006806292 |
| NM_031483    | ITCH    | 622  | 674  | 5.35605562231 |
| NM_031483    | ITCH    | 2763 | 2843 | 5.94503571566 |
| NM_031483    | ITCH    | 939  | 1004 | 4.36006649143 |
| NM_031483    | ITCH    | 2844 | 2871 | 5.86089651382 |
| NM_031483    | ITCH    | 2879 | 2918 | 5.94503548729 |
| NM_031483    | ITCH    | 4469 | 4540 | 5.35605562231 |

|               |           |      |      |                    |
|---------------|-----------|------|------|--------------------|
| NM_031483     | ITCH      | 4161 | 4209 | 5.2759340131       |
| NM_031483     | ITCH      | 2432 | 2467 | 4.2759340131       |
| NM_031483     | ITCH      | 5751 | 5778 | 4.35989947217      |
| NM_031483     | ITCH      | 154  | 238  | 5.9450357232       |
| NM_031483     | ITCH      | 2695 | 2751 | 4.36007321493      |
| NM_031483     | ITCH      | 2173 | 2259 | 4.36007322248      |
| NM_031483     | ITCH      | 2551 | 2641 | 6.36007322226      |
| NM_031483     | ITCH      | 721  | 780  | 4.35989947217      |
| NM_031483     | ITCH      | 1998 | 2073 | 5.94101812303      |
| NM_001184720  | GYG1      | 233  | 278  | 7.63754603218      |
| NM_001184720  | GYG1      | 1421 | 1477 | 6.55742442297      |
| NM_001184720  | GYG1      | 1196 | 1255 | 6.63754603218      |
| NM_001184720  | GYG1      | 668  | 751  | 8.22652612552      |
| NM_031480     | RIOK1     | 195  | 260  | 5.04182357082      |
| NM_031480     | RIOK1     | 1849 | 1935 | 4.04584093507      |
| NM_031485     | GRWD1     | 1226 | 1276 | 7.12229046827      |
| NM_031485     | GRWD1     | 603  | 670  | 6.12212344901      |
| NM_031485     | GRWD1     | 1384 | 1449 | 6.12212344901      |
| NM_031485     | GRWD1     | 455  | 492  | 6.11827959915      |
| NM_031485     | GRWD1     | 531  | 584  | 7.12229046827      |
| NM_031485     | GRWD1     | 1883 | 1985 | 6.12229719932      |
| NM_031485     | GRWD1     | 1563 | 1645 | 7.70725970004      |
| NM_031485     | GRWD1     | 1805 | 1882 | 7.11827959915      |
| NM_031485     | GRWD1     | 1645 | 1802 | 8.12229719932      |
| NM_031485     | GRWD1     | 921  | 1060 | 7.70725970004      |
| NM_031485     | GRWD1     | 2178 | 2279 | 7.7072596925       |
| NM_145255     | MRPL10    | 501  | 564  | 5.90978931889      |
| NM_145255     | MRPL10    | 779  | 830  | 5.49475181961      |
| NM_145255     | MRPL10    | 293  | 372  | 4.90979604972      |
| NM_145255     | MRPL10    | 849  | 918  | 3.90979604972      |
| NM_024646     | ZYG11B    | 5331 | 5383 | 8.01656222553      |
| NM_024646     | ZYG11B    | 6494 | 6532 | 8.01656223308      |
| NM_024644     | C14orf169 |      | 1175 | 1209 9.91976441728 |
| NM_024644     | C14orf169 |      | 1269 | 1352 11.9237820174 |
| NM_024641     | MANEA     | 637  | 715  | 10.3694689794      |
| NM_024641     | MANEA     | 835  | 881  | 9.95041387991      |
| NM_024641     | MANEA     | 2024 | 2090 | 10.3654513792      |
| NM_024641     | MANEA     | 935  | 984  | 8.36545137919      |
| NM_024641     | MANEA     | 1259 | 1349 | 9.36946224831      |
| NM_024641     | MANEA     | 4097 | 4164 | 9.36946224831      |
| NM_024641     | MANEA     | 180  | 359  | 12.0699086975      |
| NM_024641     | MANEA     | 1011 | 1098 | 10.9544314801      |
| NM_024640     | YRDC      | 597  | 641  | 8.0582416265       |
| NM_024640     | YRDC      | 713  | 762  | 7.05824139058      |
| NM_024640     | YRDC      | 961  | 1014 | 7.97410241712      |
| NM_144606     | FLCN      | 343  | 385  | 9.40578695173      |
| NM_144606     | FLCN      | 649  | 683  | 7.81680685838      |
| NM_144606     | FLCN      | 854  | 918  | 8.82082445855      |
| NM_144606     | FLCN      | 455  | 516  | 8.82065070824      |
| NM_0011101663 | NBPF24    | 21   | 68   | 7.58524470072      |

|              |         |      |      |               |
|--------------|---------|------|------|---------------|
| NM_001101663 | NBPF24  | 2532 | 2600 | 9.58525143177 |
| NM_001101663 | NBPF24  | 4502 | 4601 | 10.5852514318 |
| NM_001101663 | NBPF24  | 3612 | 3679 | 7.58525143177 |
| NM_001101663 | NBPF24  | 3304 | 3358 | 7.50111222239 |
| NM_001101663 | NBPF24  | 2757 | 2801 | 8.58524470072 |
| NM_001101663 | NBPF24  | 4431 | 4501 | 7.58525143177 |
| NM_001101663 | NBPF24  | 3553 | 3610 | 7.58525119586 |
| NM_001101663 | NBPF24  | 2411 | 2511 | 8.58525143177 |
| NM_001171904 | VPRBP   | 751  | 849  | 7.95269010268 |
| NM_001171904 | VPRBP   | 2805 | 2885 | 5.94867273842 |
| NM_001082487 | ACD     | 998  | 1071 | 8.77740912322 |
| NM_031267    | CDK13   | 138  | 188  | 7.9421250959  |
| NM_031267    | CDK13   | 4521 | 4580 | 7.52708086556 |
| NM_031267    | CDK13   | 2820 | 2894 | 7.52708758907 |
| NM_031267    | CDK13   | 705  | 765  | 5.93810749572 |
| NM_031267    | CDK13   | 1776 | 1871 | 5.93810749572 |
| NM_031267    | CDK13   | 3340 | 3470 | 7.52708759662 |
| NM_031267    | CDK13   | 3050 | 3107 | 5.93810749572 |
| NM_031267    | CDK13   | 4096 | 4148 | 5.93810749572 |
| NM_031267    | CDK13   | 2574 | 2678 | 8.26405319078 |
| NM_031267    | CDK13   | 2966 | 3049 | 6.9421250959  |
| NM_031267    | CDK13   | 1488 | 1662 | 6.9421250959  |
| NM_031266    | HNRNPAB | 909  | 962  | 3.98401334974 |
| NM_031266    | HNRNPAB | 1574 | 1618 | 4.56880210014 |
| NM_031266    | HNRNPAB | 1716 | 1751 | 4.98401311382 |
| NM_031266    | HNRNPAB | 1633 | 1708 | 3.89987414035 |
| NM_031266    | HNRNPAB | 253  | 324  | 4.56880210014 |
| NM_031266    | HNRNPAB | 105  | 153  | 3.98401334219 |
| NM_031266    | HNRNPAB | 1527 | 1574 | 4.56897585046 |
| NM_031266    | HNRNPAB | 408  | 617  | 6.89090394535 |
| NM_031266    | HNRNPAB | 1039 | 1103 | 4.56897585046 |
| NM_031266    | HNRNPAB | 1112 | 1170 | 4.56897561454 |
| NM_031266    | HNRNPAB | 1183 | 1470 | 7.15393835118 |
| NM_031266    | HNRNPAB | 674  | 884  | 5.98401334974 |
| NM_001166059 | HMGCL   | 804  | 876  | 6.38861113722 |
| NM_001136123 | FAM178A | 2413 | 2453 | 5.44780223045 |
| NM_001136123 | FAM178A | 2808 | 2865 | 6.53194143229 |
| NM_001136123 | FAM178A | 2948 | 3007 | 7.11288634038 |
| NM_001136123 | FAM178A | 3058 | 3166 | 7.53194143984 |
| NM_001136123 | FAM178A | 3822 | 3911 | 7.11690393301 |
| NM_021034    | IFITM3  | 48   | 665  | 11.4485002728 |
| NM_178557    | NAT8L   | 1525 | 1579 | 11.9231330153 |
| NM_032683    | MPV17L2 | 284  | 339  | 10.5693716039 |
| NM_032683    | MPV17L2 | 1131 | 1226 | 9.56937137552 |
| NM_020529    | NFKBIA  | 485  | 554  | 6.66729834211 |
| NM_020529    | NFKBIA  | 949  | 988  | 3.85592581988 |
| NM_020529    | NFKBIA  | 1221 | 1294 | 5.44490592077 |
| NM_020529    | NFKBIA  | 991  | 1122 | 6.66729834211 |
| NM_020529    | NFKBIA  | 669  | 841  | 6.66729834211 |
| NM_020529    | NFKBIA  | 182  | 311  | 5.85994342005 |

|              |        |      |      |               |
|--------------|--------|------|------|---------------|
| NM_020529    | NFKBIA | 1338 | 1442 | 6.44490592077 |
| NM_014278    | HSPA4L | 939  | 1012 | 8.63547188145 |
| NM_014278    | HSPA4L | 73   | 136  | 8.04649178056 |
| NM_001025596 | CELF1  | 208  | 257  | 4.98518375235 |
| NM_001025596 | CELF1  | 1723 | 1765 | 6.65428546246 |
| NM_001025596 | CELF1  | 2575 | 2641 | 5.06530536156 |
| NM_001025596 | CELF1  | 81   | 163  | 7.06932296174 |
| NM_001025596 | CELF1  | 3449 | 3502 | 6.06931623068 |
| NM_001025596 | CELF1  | 1270 | 1302 | 6.65411171214 |
| NM_001025596 | CELF1  | 4122 | 4173 | 6.65428546246 |
| NM_001025596 | CELF1  | 2489 | 2562 | 6.06932296174 |
| NM_001025596 | CELF1  | 3986 | 4037 | 5.06931623068 |
| NM_001025596 | CELF1  | 981  | 1024 | 6.65428522654 |
| NM_001025596 | CELF1  | 658  | 750  | 6.65428546246 |
| NM_001025596 | CELF1  | 377  | 462  | 7.06932296174 |
| NM_001025596 | CELF1  | 2020 | 2146 | 8.06932296174 |
| NM_001025596 | CELF1  | 1561 | 1649 | 7.06932296174 |
| NM_001025596 | CELF1  | 4037 | 4106 | 6.06931623068 |
| NM_001025596 | CELF1  | 904  | 967  | 5.06931623068 |
| NM_001025596 | CELF1  | 1311 | 1401 | 7.06932296173 |
| NM_001025596 | CELF1  | 3628 | 3819 | 8.06932296174 |
| NM_001025596 | CELF1  | 1403 | 1560 | 6.06932296174 |
| NM_014270    | SLC7A9 | 1060 | 1125 | 12.8079612603 |
| NM_014270    | SLC7A9 | 1356 | 1417 | 12.8079612603 |
| NM_014270    | SLC7A9 | 984  | 1058 | 11.80778751   |
| NM_014270    | SLC7A9 | 1131 | 1176 | 12.3087845516 |
| NM_014270    | SLC7A9 | 1513 | 1570 | 12.3927500107 |
| NM_014275    | MGAT4B | 1072 | 1137 | 5.19788574072 |
| NM_014275    | MGAT4B | 548  | 640  | 5.93485133489 |
| NM_014275    | MGAT4B | 89   | 175  | 7.19788574072 |
| NM_014275    | MGAT4B | 1908 | 2087 | 7.78284824144 |
| NM_014275    | MGAT4B | 1847 | 1897 | 3.52878403062 |
| NM_014275    | MGAT4B | 1464 | 1620 | 6.93485133489 |
| NM_014275    | MGAT4B | 783  | 1000 | 7.42027816206 |
| NM_014275    | MGAT4B | 1149 | 1446 | 8.56711955039 |
| NM_014275    | MGAT4B | 650  | 764  | 5.93485133489 |
| NM_014275    | MGAT4B | 2229 | 2456 | 7.86085075344 |
| NM_014275    | MGAT4B | 374  | 532  | 7.07235485864 |
| NM_014275    | MGAT4B | 1624 | 1809 | 7.51981383561 |
| NM_001005526 | SF3B1  | 327  | 460  | 4.90279534517 |
| NM_001005526 | SF3B1  | 30   | 292  | 6.1251877665  |
| NM_015278    | SASH1  | 1210 | 1283 | 6.47855461448 |
| NM_015278    | SASH1  | 6798 | 6897 | 6.39458915541 |
| NM_015276    | USP22  | 1694 | 1751 | 5.74057549831 |
| NM_015276    | USP22  | 4059 | 4143 | 7.54793042038 |
| NM_015276    | USP22  | 3075 | 3123 | 6.32553799904 |
| NM_015276    | USP22  | 411  | 474  | 8.32553799904 |
| NM_015276    | USP22  | 1391 | 1498 | 7.32553799904 |
| NM_015276    | USP22  | 4755 | 4810 | 4.73655789815 |
| NM_015276    | USP22  | 3689 | 3756 | 6.74057549832 |

|           |        |      |      |               |
|-----------|--------|------|------|---------------|
| NM_015276 | USP22  | 4605 | 4669 | 6.32553799882 |
| NM_015276 | USP22  | 1004 | 1056 | 6.32553776312 |
| NM_015276 | USP22  | 4471 | 4599 | 8.44101521646 |
| NM_015276 | USP22  | 4152 | 4202 | 5.7405752624  |
| NM_015276 | USP22  | 2477 | 2508 | 4.73655789815 |
| NM_015276 | USP22  | 3201 | 3282 | 7.06250359321 |
| NM_015276 | USP22  | 1751 | 1791 | 6.32152039887 |
| NM_015276 | USP22  | 258  | 330  | 5.74057549832 |
| NM_015276 | USP22  | 2515 | 2600 | 6.32152039887 |
| NM_015276 | USP22  | 3555 | 3630 | 7.74057549832 |
| NM_015276 | USP22  | 4822 | 5144 | 8.64746609393 |
| NM_015276 | USP22  | 1536 | 1672 | 7.06250359321 |
| NM_015276 | USP22  | 2648 | 2777 | 8.20000711696 |
| NM_015276 | USP22  | 1076 | 1159 | 6.32553799904 |
| NM_015276 | USP22  | 1161 | 1334 | 7.32553799904 |
| NM_015276 | USP22  | 4265 | 4438 | 8.06250359321 |
| NM_015276 | USP22  | 1941 | 2061 | 4.74057549832 |
| NM_015276 | USP22  | 608  | 947  | 9.54793042038 |
| NM_015276 | USP22  | 481  | 578  | 7.06250359321 |
| NM_015276 | USP22  | 2791 | 3001 | 8.64746609393 |
| NM_015276 | USP22  | 3456 | 3552 | 6.32553799904 |
| NM_015276 | USP22  | 3911 | 3982 | 4.7405752624  |
| NM_015276 | USP22  | 2231 | 2455 | 8.32553799904 |
| NM_015277 | NEDD4L | 2250 | 2306 | 6.36514021498 |
| NM_015277 | NEDD4L | 2714 | 2819 | 7.1021125402  |
| NM_015277 | NEDD4L | 2641 | 2689 | 6.78018420939 |
| NM_015277 | NEDD4L | 1874 | 1942 | 4.78001069499 |
| NM_015277 | NEDD4L | 2134 | 2201 | 6.36514694603 |
| NM_015277 | NEDD4L | 2365 | 2409 | 4.78017771426 |
| NM_015277 | NEDD4L | 2425 | 2597 | 7.95010944675 |
| NM_015277 | NEDD4L | 3018 | 3150 | 7.36514694603 |
| NM_015277 | NEDD4L | 885  | 1015 | 7.1021125402  |
| NM_015277 | NEDD4L | 2864 | 3013 | 7.58753936737 |
| NM_015274 | MAN2B2 | 2145 | 2214 | 8.75833738786 |
| NM_015274 | MAN2B2 | 708  | 754  | 9.75833739541 |
| NM_015274 | MAN2B2 | 1293 | 1351 | 11.0802654903 |
| NM_015274 | MAN2B2 | 1560 | 1631 | 8.75833715949 |
| NM_015274 | MAN2B2 | 1187 | 1261 | 9.75833738786 |
| NM_015274 | MAN2B2 | 1496 | 1545 | 10.339282296  |
| NM_015274 | MAN2B2 | 144  | 179  | 8.67419818603 |
| NM_015274 | MAN2B2 | 650  | 702  | 10.3432998959 |
| NM_015274 | MAN2B2 | 250  | 310  | 8.75431979524 |
| NM_015274 | MAN2B2 | 2474 | 2525 | 8.75431979524 |
| NM_015274 | MAN2B2 | 1772 | 1882 | 10.7583373954 |
| NM_015274 | MAN2B2 | 1018 | 1117 | 10.7583373954 |
| NM_015274 | MAN2B2 | 2262 | 2370 | 9.75833739541 |
| NM_015274 | MAN2B2 | 371  | 453  | 10.3432998961 |
| NM_015274 | MAN2B2 | 2006 | 2070 | 10.7583373954 |
| NM_015274 | MAN2B2 | 4000 | 4127 | 8.75833739541 |
| NM_015274 | MAN2B2 | 3873 | 3958 | 10.3432931651 |

|           |          |      |      |      |               |
|-----------|----------|------|------|------|---------------|
| NM_015275 | KIAA1033 |      | 2065 | 2118 | 6.18888467504 |
| NM_015275 | KIAA1033 |      | 2119 | 2171 | 6.18486708241 |
| NM_015275 | KIAA1033 |      | 5179 | 5228 | 7.51081254156 |
| NM_015275 | KIAA1033 |      | 2196 | 2251 | 5.18486708241 |
| NM_015275 | KIAA1033 |      | 1291 | 1396 | 7.18888468259 |
| NM_015275 | KIAA1033 |      | 207  | 248  | 5.18486708241 |
| NM_015275 | KIAA1033 |      | 308  | 376  | 6.68970797393 |
| NM_015275 | KIAA1033 |      | 3000 | 3089 | 5.18888468258 |
| NM_015275 | KIAA1033 |      | 1012 | 1182 | 7.18888468259 |
| NM_015270 | ADCY6    | 1359 | 1418 |      | 9.10802807666 |
| NM_015270 | ADCY6    | 3652 | 3699 |      | 8.10401048403 |
| NM_015270 | ADCY6    | 5602 | 5661 |      | 9.10802135315 |
| NM_015270 | ADCY6    | 5180 | 5260 |      | 8.10802808421 |
| NM_015270 | ADCY6    | 2504 | 2556 |      | 8.02388887482 |
| NM_015270 | ADCY6    | 5526 | 5595 |      | 10.1078543339 |
| NM_015270 | ADCY6    | 2112 | 2156 |      | 8.10802135315 |
| NM_015270 | ADCY6    | 5805 | 5933 |      | 10.4299561791 |
| NM_015270 | ADCY6    | 2615 | 2665 |      | 8.02388887482 |
| NM_015270 | ADCY6    | 3894 | 3923 |      | 9.02388887482 |
| NM_015270 | ADCY6    | 3553 | 3599 |      | 9.10802784829 |
| NM_015270 | ADCY6    | 2674 | 2722 |      | 9.10401048403 |
| NM_015270 | ADCY6    | 1206 | 1270 |      | 10.104010484  |
| NM_015270 | ADCY6    | 2400 | 2473 |      | 9.10802808399 |
| NM_015270 | ADCY6    | 2890 | 2994 |      | 9.69299058493 |
| NM_015270 | ADCY6    | 2210 | 2267 |      | 8.10401048403 |
| NM_015270 | ADCY6    | 3274 | 3341 |      | 9.10785433389 |
| NM_015270 | ADCY6    | 700  | 797  |      | 10.6929905849 |
| NM_015270 | ADCY6    | 3100 | 3236 |      | 11.2779530856 |
| NM_015270 | ADCY6    | 1443 | 1572 |      | 10.6929905849 |
| NM_015270 | ADCY6    | 2745 | 2865 |      | 10.1080280842 |
| NM_015271 | TRIM2    | 415  | 461  |      | 9.81779323742 |
| NM_019005 | MIOS     | 2626 | 2683 |      | 7.36302787227 |
| NM_019004 | ANKIB1   | 5742 | 5788 |      | 6.20141485218 |
| NM_019004 | ANKIB1   | 3412 | 3477 |      | 6.20141485218 |
| NM_019004 | ANKIB1   | 1177 | 1234 |      | 6.11744939311 |
| NM_019004 | ANKIB1   | 540  | 616  |      | 7.20141485218 |
| NM_019004 | ANKIB1   | 3248 | 3329 |      | 6.19757100232 |
| NM_019007 | ARMCX6   | 377  | 416  |      | 9.11005707911 |
| NM_019007 | ARMCX6   | 216  | 277  |      | 11.1102308294 |
| NM_019007 | ARMCX6   | 707  | 743  |      | 10.1062132293 |
| NM_019009 | TOLLIP   | 376  | 435  |      | 5.91673769991 |
| NM_019009 | TOLLIP   | 3039 | 3084 |      | 7.49768283637 |
| NM_019009 | TOLLIP   | 1252 | 1301 |      | 6.91673792828 |
| NM_019009 | TOLLIP   | 1953 | 2019 |      | 7.91272033565 |
| NM_019009 | TOLLIP   | 520  | 576  |      | 7.49768283637 |
| NM_019009 | TOLLIP   | 1353 | 1426 |      | 5.91673769991 |
| NM_019009 | TOLLIP   | 3539 | 3578 |      | 5.9167379356  |
| NM_019009 | TOLLIP   | 3172 | 3225 |      | 6.83259872644 |
| NM_019008 | SMCR7L   | 398  | 469  |      | 7.43600181035 |
| NM_019008 | SMCR7L   | 3264 | 3347 |      | 8.10510352045 |

|              |               |      |      |               |               |
|--------------|---------------|------|------|---------------|---------------|
| NM_019008    | SMCR7L        | 2274 | 2324 | 8.52014101973 |               |
| NM_019008    | SMCR7L        | 3355 | 3427 | 7.52013428868 |               |
| NM_019008    | SMCR7L        | 2418 | 2454 | 8.10492977014 |               |
| NM_019008    | SMCR7L        | 903  | 992  | 6.52014101951 |               |
| NM_019008    | SMCR7L        | 223  | 343  | 8.10510352045 |               |
| NM_019008    | SMCR7L        | 1996 | 2121 | 8.52014101973 |               |
| NM_019008    | SMCR7L        | 2669 | 2735 | 7.52013428868 |               |
| NM_005168    | RND3          | 1682 | 1715 | 10.2141710768 |               |
| NM_005168    | RND3          | 779  | 922  | 11.8832727794 |               |
| NM_005168    | RND3          | 572  | 634  | 10.2983035551 |               |
| NM_001204478 | FAM18B2-CDRT4 |      | 247  | 332           | 8.24144068743 |
| NM_001204478 | FAM18B2-CDRT4 |      | 468  | 581           | 9.65665193703 |
| NM_001204478 | FAM18B2-CDRT4 |      | 332  | 465           | 10.5635425326 |
| NM_005163    | AKT1          | 2252 | 2323 | 5.65487836315 |               |
| NM_005163    | AKT1          | 846  | 898  | 3.65487836315 |               |
| NM_005163    | AKT1          | 899  | 944  | 5.23984085632 |               |
| NM_005163    | AKT1          | 660  | 719  | 3.65470461283 |               |
| NM_005163    | AKT1          | 2711 | 2835 | 6.46223328521 |               |
| NM_005163    | AKT1          | 948  | 1032 | 5.65487812723 |               |
| NM_005163    | AKT1          | 1310 | 1412 | 3.65487836315 |               |
| NM_005163    | AKT1          | 1414 | 1564 | 5.23984086387 |               |
| NM_178123    | SESTD1        | 472  | 570  | 5.39924939928 |               |
| NM_178123    | SESTD1        | 2424 | 2495 | 3.07732130439 |               |
| NM_178123    | SESTD1        | 1312 | 1380 | 4.66228380511 |               |
| NM_178123    | SESTD1        | 785  | 871  | 4.66228380489 |               |
| NM_178123    | SESTD1        | 1190 | 1232 | 3.07714755407 |               |
| NM_178123    | SESTD1        | 9337 | 9400 | 3.07732130439 |               |
| NM_178123    | SESTD1        | 1559 | 1626 | 4.07732130439 |               |
| NM_178123    | SESTD1        | 3731 | 3787 | 4.65826620494 |               |
| NM_178123    | SESTD1        | 3863 | 3907 | 4.07330370422 |               |
| NM_178123    | SESTD1        | 9435 | 9493 | 4.66228380511 |               |
| NM_178123    | SESTD1        | 2705 | 2759 | 4.07330370422 |               |
| NM_178123    | SESTD1        | 1234 | 1310 | 4.07731457334 |               |
| NM_178123    | SESTD1        | 891  | 923  | 2.99318209501 |               |
| NM_178123    | SESTD1        | 741  | 775  | 4.99318209501 |               |
| NM_178123    | SESTD1        | 2608 | 2695 | 3.07732130439 |               |
| NM_178123    | SESTD1        | 297  | 387  | 5.39924939928 |               |
| NM_178123    | SESTD1        | 7239 | 7314 | 4.07731457334 |               |
| NM_178123    | SESTD1        | 1648 | 1724 | 4.07732130439 |               |
| NM_178123    | SESTD1        | 1843 | 2024 | 5.88467622645 |               |
| NM_001129993 | KIAA1841      |      | 157  | 221           | 7.96132136465 |
| NM_178126    | FAM134C       | 3265 | 3317 | 9.42252349206 |               |
| NM_178126    | FAM134C       | 937  | 996  | 9.00749248791 |               |
| NM_178126    | FAM134C       | 607  | 647  | 8.42252349206 |               |
| NM_178126    | FAM134C       | 1412 | 1492 | 10.2298851452 |               |
| NM_178126    | FAM134C       | 1232 | 1302 | 8.42235647279 |               |
| NM_178126    | FAM134C       | 1085 | 1148 | 8.42253021556 |               |
| NM_178126    | FAM134C       | 2892 | 2941 | 9.00731897352 |               |
| NM_178126    | FAM134C       | 810  | 861  | 7.33839101373 |               |
| NM_178126    | FAM134C       | 332  | 411  | 10.5924552246 |               |

|              |         |      |      |                |
|--------------|---------|------|------|----------------|
| NM_178126    | FAM134C | 2757 | 2813 | 7.41851262294  |
| NM_178126    | FAM134C | 2090 | 2190 | 8.42253021556  |
| NM_178126    | FAM134C | 493  | 585  | 9.00749272383  |
| NM_178126    | FAM134C | 683  | 793  | 10.4225302231  |
| NM_001005291 | SREBF1  | 195  | 286  | 7.80832882072  |
| NM_001005291 | SREBF1  | 3900 | 3969 | 7.07136322656  |
| NM_001005291 | SREBF1  | 4274 | 4341 | 8.48640072584  |
| NM_001005291 | SREBF1  | 1835 | 1908 | 6.48640072584  |
| NM_001005291 | SREBF1  | 4866 | 4927 | 5.48640048992  |
| NM_001005291 | SREBF1  | 346  | 440  | 8.48640072584  |
| NM_001005291 | SREBF1  | 4927 | 4983 | 5.48622697552  |
| NM_001005291 | SREBF1  | 1136 | 1197 | 7.07136322656  |
| NM_001005291 | SREBF1  | 3309 | 3369 | 7.07136322655  |
| NM_001005291 | SREBF1  | 2580 | 2843 | 10.241288228   |
| NM_001005291 | SREBF1  | 2361 | 2550 | 9.65632572728  |
| NM_001005291 | SREBF1  | 2279 | 2355 | 5.48640072584  |
| NM_001005291 | SREBF1  | 893  | 1117 | 8.48640072584  |
| NM_001005291 | SREBF1  | 3548 | 3876 | 9.73432823928  |
| NM_001005291 | SREBF1  | 2133 | 2278 | 9.18684044398  |
| NM_001005291 | SREBF1  | 3111 | 3227 | 8.48640072584  |
| NM_001005291 | SREBF1  | 495  | 703  | 7.48640072584  |
| NM_001005291 | SREBF1  | 2865 | 3087 | 8.29375564789  |
| NM_001005291 | SREBF1  | 1916 | 2079 | 9.57386356709  |
| NM_001005291 | SREBF1  | 3971 | 4252 | 9.80832882072  |
| NM_001005291 | SREBF1  | 1285 | 1801 | 10.9782538222  |
| NM_213595    | ISCU    | 328  | 372  | 3.42102190032  |
| NM_213595    | ISCU    | 258  | 308  | 5.09011687937  |
| NM_213595    | ISCU    | 374  | 406  | 4.50114350953  |
| NM_213598    | ZNF543  | 2419 | 2510 | 9.59405732915  |
| NM_001162536 | RBMXL1  | 1830 | 1873 | 3.80550429115  |
| NM_001162536 | RBMXL1  | 793  | 835  | 5.39047352293  |
| NM_001162536 | RBMXL1  | 859  | 943  | 5.39047352293  |
| NM_001162536 | RBMXL1  | 1877 | 1909 | 3.72137181282  |
| NM_001162536 | RBMXL1  | 2450 | 2500 | 6.12743911709  |
| NM_001162536 | RBMXL1  | 1951 | 1998 | 4.80551102221  |
| NM_001162536 | RBMXL1  | 1652 | 1721 | 4.80551102221  |
| NM_001162536 | RBMXL1  | 1327 | 1369 | 3.80533727189  |
| NM_001162536 | RBMXL1  | 4026 | 4093 | 4.80551102199  |
| NM_001162536 | RBMXL1  | 721  | 788  | 4.80550429115  |
| NM_001162536 | RBMXL1  | 1501 | 1605 | 6.61286594426  |
| NM_001162536 | RBMXL1  | 1133 | 1269 | 6.12743911709  |
| NM_004415    | DSP     | 7102 | 7161 | 3.85515343496  |
| NM_004415    | DSP     | 8823 | 8947 | 4.0250784364   |
| NM_004415    | DSP     | 2385 | 2444 | 2.44011569976  |
| NM_004415    | DSP     | 9124 | 9196 | 3.66250835702  |
| NM_004415    | DSP     | 2268 | 2334 | 0.855153434736 |
| NM_004415    | DSP     | 4359 | 4416 | 0.85497968464  |
| NM_004415    | DSP     | 3679 | 3713 | 1.85515343496  |
| NM_004415    | DSP     | 6148 | 6203 | 2.85515343474  |
| NM_004415    | DSP     | 1920 | 2046 | 4.0250784364   |



|              |         |      |      |                |
|--------------|---------|------|------|----------------|
| NM_004415    | DSP     | 2151 | 2225 | 1.85515343496  |
| NM_004415    | DSP     | 6441 | 6553 | 4.44011593568  |
| NM_004415    | DSP     | 792  | 837  | 0.855153427409 |
| NM_004415    | DSP     | 5751 | 5815 | 2.85515343496  |
| NM_004415    | DSP     | 4108 | 4167 | 0.851135834785 |
| NM_004415    | DSP     | 9223 | 9337 | 3.66250835702  |
| NM_004415    | DSP     | 7386 | 7498 | 3.17708152985  |
| NM_004415    | DSP     | 1217 | 1266 | 2.44011593567  |
| NM_004415    | DSP     | 4426 | 4533 | 1.85515343496  |
| NM_004415    | DSP     | 8200 | 8356 | 3.17708152985  |
| NM_004415    | DSP     | 3523 | 3678 | 4.17708152985  |
| NM_004415    | DSP     | 2455 | 2560 | 4.3145850536   |
| NM_004415    | DSP     | 7872 | 8054 | 4.44011593568  |
| NM_004415    | DSP     | 843  | 928  | 3.66250835702  |
| NM_004415    | DSP     | 8616 | 8722 | 3.17708152985  |
| NM_004415    | DSP     | 7506 | 7634 | 4.0250784364   |
| NM_004415    | DSP     | 6909 | 7097 | 4.94261627621  |
| NM_004415    | DSP     | 2057 | 2144 | 3.44011593568  |
| NM_004415    | DSP     | 5436 | 5583 | 2.44011593568  |
| NM_004415    | DSP     | 946  | 1203 | 4.44011593568  |
| NM_004415    | DSP     | 5989 | 6124 | 1.85515343496  |
| NM_004415    | DSP     | 2617 | 2991 | 6.0250784364   |
| NM_004415    | DSP     | 7732 | 7864 | 3.17708152985  |
| NM_004415    | DSP     | 3048 | 3479 | 6.0250784364   |
| NM_004415    | DSP     | 8061 | 8166 | 3.85515343496  |
| NM_004415    | DSP     | 213  | 687  | 5.37871539101  |
| NM_004415    | DSP     | 4804 | 4998 | 3.17708152985  |
| NM_004415    | DSP     | 5641 | 5737 | 1.85515343496  |
| NM_004415    | DSP     | 6216 | 6357 | 4.3145850536   |
| NM_004415    | DSP     | 4228 | 4282 | 0.855153199039 |
| NM_004415    | DSP     | 9369 | 9588 | 5.24747085774  |
| NM_004415    | DSP     | 6576 | 6883 | 5.0250784364   |
| NM_004415    | DSP     | 3970 | 4079 | 2.85515343496  |
| NM_004415    | DSP     | 1306 | 1458 | 3.85515343496  |
| NM_004415    | DSP     | 8954 | 9117 | 3.44011593568  |
| NM_004415    | DSP     | 1476 | 1904 | 5.71313443009  |
| NM_004415    | DSP     | 5857 | 5983 | 1.85515343496  |
| NM_004415    | DSP     | 7166 | 7385 | 5.0250784364   |
| NM_004415    | DSP     | 3746 | 3860 | 1.85515343496  |
| NM_001174089 | SLC4A11 | 1862 | 1914 | 9.89501799458  |
| NM_001174089 | SLC4A11 | 839  | 923  | 9.31005549385  |
| NM_001174089 | SLC4A11 | 1554 | 1688 | 10.6319835887  |
| NM_001174089 | SLC4A11 | 543  | 599  | 9.3100554863   |
| NM_001174089 | SLC4A11 | 1370 | 1471 | 10.6319835887  |
| NM_001174089 | SLC4A11 | 1151 | 1186 | 8.3100554863   |
| NM_001174089 | SLC4A11 | 2687 | 2760 | 9.89501799458  |
| NM_001174089 | SLC4A11 | 3032 | 3084 | 9.31005549385  |
| NM_001174089 | SLC4A11 | 281  | 375  | 9.31005549363  |
| NM_001174089 | SLC4A11 | 667  | 726  | 9.3100554863   |
| NM_001174089 | SLC4A11 | 132  | 215  | 8.31005549363  |

|              |         |      |      |               |
|--------------|---------|------|------|---------------|
| NM_001174089 | SLC4A11 | 2811 | 2910 | 10.3100554938 |
| NM_001174089 | SLC4A11 | 2233 | 2344 | 8.31005549385 |
| NM_001174089 | SLC4A11 | 2054 | 2201 | 10.6319835887 |
| NM_004146    | NDUFB7  | 300  | 365  | 8.26703814359 |
| NM_004146    | NDUFB7  | 186  | 281  | 8.58896623848 |
| NM_004146    | NDUFB7  | 109  | 179  | 7.26703813604 |
| NM_001395    | DUSP9   | 1535 | 1585 | 6.50044013297 |
| NM_001395    | DUSP9   | 931  | 1006 | 5.50044013297 |
| NM_001395    | DUSP9   | 1193 | 1247 | 5.50044013297 |
| NM_001395    | DUSP9   | 1025 | 1080 | 6.50044013297 |
| NM_001395    | DUSP9   | 1480 | 1517 | 4.91547763225 |
| NM_001395    | DUSP9   | 675  | 806  | 6.23740572714 |
| NM_001395    | DUSP9   | 1936 | 1980 | 5.50043340192 |
| NM_001395    | DUSP9   | 291  | 327  | 3.91146003208 |
| NM_001395    | DUSP9   | 488  | 533  | 3.91530388193 |
| NM_001395    | DUSP9   | 214  | 276  | 3.91547763203 |
| NM_001395    | DUSP9   | 1086 | 1189 | 6.72283255431 |
| NM_001395    | DUSP9   | 2130 | 2189 | 3.83133842287 |
| NM_001425    | EMP3    | 349  | 403  | 9.33974162418 |
| NM_001425    | EMP3    | 507  | 603  | 9.33974162418 |
| NM_001425    | EMP3    | 191  | 249  | 9.92470412512 |
| NM_001425    | EMP3    | 418  | 503  | 10.6616697193 |
| NM_001425    | EMP3    | 278  | 341  | 8.33974138848 |
| NM_001429    | EP300   | 5429 | 5479 | 7.42811743081 |
| NM_001429    | EP300   | 4158 | 4261 | 5.1061893357  |
| NM_001429    | EP300   | 2317 | 2369 | 6.1060155856  |
| NM_001429    | EP300   | 6924 | 6965 | 5.10217173575 |
| NM_001429    | EP300   | 4083 | 4156 | 7.42811743059 |
| NM_001429    | EP300   | 2764 | 2812 | 6.10618260487 |
| NM_001429    | EP300   | 3687 | 3742 | 5.1061891     |
| NM_001429    | EP300   | 5624 | 5661 | 5.02205012654 |
| NM_001429    | EP300   | 1676 | 1722 | 7.42811069976 |
| NM_001429    | EP300   | 4994 | 5032 | 6.02205012654 |
| NM_001429    | EP300   | 8379 | 8435 | 6.1060155856  |
| NM_001429    | EP300   | 7548 | 7612 | 6.1061893357  |
| NM_001429    | EP300   | 5213 | 5257 | 7.10618260487 |
| NM_001429    | EP300   | 332  | 389  | 6.68713423647 |
| NM_001429    | EP300   | 2217 | 2278 | 6.69115182909 |
| NM_001429    | EP300   | 485  | 551  | 6.10618933592 |
| NM_001429    | EP300   | 3792 | 3849 | 6.1061893357  |
| NM_001429    | EP300   | 3588 | 3685 | 5.10618933592 |
| NM_001429    | EP300   | 2534 | 2645 | 6.1061893357  |
| NM_001429    | EP300   | 1568 | 1639 | 5.1060155856  |
| NM_001938    | DR1     | 1678 | 1731 | 5.67399404551 |
| NM_001938    | DR1     | 434  | 546  | 9.08006134978 |
| NM_001938    | DR1     | 938  | 999  | 6.75812652384 |
| NM_001938    | DR1     | 1324 | 1378 | 8.08006111386 |
| NM_001938    | DR1     | 1408 | 1456 | 6.75813325489 |
| NM_001938    | DR1     | 103  | 144  | 7.34309574806 |
| NM_001938    | DR1     | 41   | 95   | 5.75411565472 |

|           |          |      |      |               |
|-----------|----------|------|------|---------------|
| NM_001938 | DR1      | 565  | 650  | 7.75813325467 |
| NM_001938 | DR1      | 713  | 821  | 7.34309575561 |
| NM_022731 | NUCKS1   | 3526 | 3617 | 4.12018845125 |
| NM_022731 | NUCKS1   | 4851 | 4901 | 2.31283352897 |
| NM_022731 | NUCKS1   | 2623 | 2682 | 2.89779602992 |
| NM_022731 | NUCKS1   | 2161 | 2216 | 2.89779602992 |
| NM_022731 | NUCKS1   | 3932 | 3995 | 2.89779602992 |
| NM_022731 | NUCKS1   | 94   | 155  | 3.31283352919 |
| NM_022731 | NUCKS1   | 4159 | 4210 | 1.22869431981 |
| NM_022731 | NUCKS1   | 4329 | 4398 | 2.89779602992 |
| NM_022731 | NUCKS1   | 4623 | 4672 | 3.3128335292  |
| NM_022731 | NUCKS1   | 998  | 1033 | 2.897795794   |
| NM_022731 | NUCKS1   | 1338 | 1396 | 2.3128335292  |
| NM_022731 | NUCKS1   | 660  | 733  | 3.3128335292  |
| NM_022731 | NUCKS1   | 2745 | 2858 | 4.77226514783 |
| NM_022731 | NUCKS1   | 1545 | 1642 | 2.89779602992 |
| NM_022731 | NUCKS1   | 4792 | 4829 | 2.31283329328 |
| NM_022731 | NUCKS1   | 1287 | 1332 | 2.31265977888 |
| NM_022731 | NUCKS1   | 1877 | 1942 | 2.31282679814 |
| NM_022731 | NUCKS1   | 5093 | 5194 | 3.3128335292  |
| NM_022731 | NUCKS1   | 3005 | 3061 | 1.31282679814 |
| NM_022731 | NUCKS1   | 4551 | 4622 | 3.89779602992 |
| NM_022731 | NUCKS1   | 3680 | 3806 | 4.12018845125 |
| NM_022731 | NUCKS1   | 5195 | 5309 | 3.3128335292  |
| NM_022731 | NUCKS1   | 3996 | 4031 | 2.89778929886 |
| NM_022731 | NUCKS1   | 4211 | 4269 | 3.31283352165 |
| NM_022731 | NUCKS1   | 5330 | 5574 | 5.01327324734 |
| NM_022731 | NUCKS1   | 5705 | 5909 | 4.48275853064 |
| NM_022731 | NUCKS1   | 3353 | 3473 | 4.3128335292  |
| NM_022731 | NUCKS1   | 3212 | 3343 | 4.12018845125 |
| NM_022731 | NUCKS1   | 4416 | 4517 | 2.89779602992 |
| NM_022731 | NUCKS1   | 226  | 492  | 4.63476162408 |
| NM_022731 | NUCKS1   | 1672 | 1817 | 3.63476162408 |
| NM_022731 | NUCKS1   | 2372 | 2446 | 2.31282679814 |
| NM_022730 | COPS7B   | 412  | 460  | 4.19819826468 |
| NM_022730 | COPS7B   | 1937 | 1980 | 5.20221586485 |
| NM_022730 | COPS7B   | 765  | 845  | 4.11807665547 |
| NM_022730 | COPS7B   | 1761 | 1932 | 6.20221586485 |
| NM_022733 | SMAP2    | 2675 | 2751 | 3.66942630977 |
| NM_022735 | ACBD3    | 1150 | 1203 | 5.35673975258 |
| NM_022735 | ACBD3    | 1735 | 1777 | 6.94152850298 |
| NM_022734 | METTTL17 | 488  | 601  | 6.81735083868 |
| NM_022734 | METTTL17 | 440  | 487  | 4.49140514362 |
| NM_022734 | METTTL17 | 1179 | 1255 | 6.08038524451 |
| NM_022734 | METTTL17 | 278  | 365  | 6.0802114942  |
| NM_022734 | METTTL17 | 824  | 896  | 5.49542274379 |
| NM_022734 | METTTL17 | 1461 | 1564 | 6.81735083868 |
| NM_022734 | METTTL17 | 1046 | 1128 | 6.81735083113 |
| NM_022734 | METTTL17 | 603  | 706  | 6.81735083868 |
| NM_022736 | MFSD1    | 1164 | 1244 | 10.5231341641 |

|           |         |      |      |               |
|-----------|---------|------|------|---------------|
| NM_022736 | MFSD1   | 1761 | 1814 | 8.85403245395 |
| NM_022736 | MFSD1   | 1851 | 1908 | 9.93816493228 |
| NM_022736 | MFSD1   | 501  | 542  | 10.5191165639 |
| NM_022736 | MFSD1   | 396  | 433  | 9.93799791301 |
| NM_022736 | MFSD1   | 1631 | 1685 | 9.93799791301 |
| NM_022736 | MFSD1   | 1685 | 1748 | 8.93817166311 |
| NM_022736 | MFSD1   | 868  | 926  | 10.9381716558 |
| NM_022736 | MFSD1   | 926  | 1110 | 12.8450622589 |
| NM_022736 | MFSD1   | 1268 | 1627 | 14.5231341641 |
| NM_022736 | MFSD1   | 586  | 863  | 13.4617336194 |
| NM_022736 | MFSD1   | 2100 | 2219 | 11.2600997582 |
| NM_022082 | SLC17A9 | 1409 | 1503 | 6.83243748316 |
| NM_022082 | SLC17A9 | 1815 | 1892 | 5.51050265722 |
| NM_022082 | SLC17A9 | 1324 | 1403 | 6.51050938827 |
| NM_022082 | SLC17A9 | 1942 | 2021 | 5.51050938827 |
| NM_022082 | SLC17A9 | 535  | 599  | 4.42637017889 |
| NM_022082 | SLC17A9 | 1575 | 1640 | 4.5064917881  |
| NM_022082 | SLC17A9 | 429  | 517  | 6.09547188899 |
| NM_022082 | SLC17A9 | 984  | 1093 | 7.09547188899 |
| NM_022082 | SLC17A9 | 2058 | 2139 | 6.09547188899 |
| NM_022082 | SLC17A9 | 246  | 402  | 6.83243748316 |
| NM_022082 | SLC17A9 | 697  | 824  | 7.31786431033 |
| NM_022082 | SLC17A9 | 2171 | 2280 | 4.51050938827 |
| NM_022082 | SLC17A9 | 2400 | 2484 | 6.51050938827 |
| NM_022082 | SLC17A9 | 1105 | 1287 | 7.31786431033 |
| NM_022082 | SLC17A9 | 889  | 984  | 6.09547188899 |
| NM_022081 | HPS4    | 837  | 893  | 9.22852858365 |
| NM_022081 | HPS4    | 1623 | 1667 | 7.82246128693 |
| NM_022081 | HPS4    | 400  | 507  | 6.90258289614 |
| NM_022081 | HPS4    | 1060 | 1126 | 6.90659376526 |
| NM_022081 | HPS4    | 1714 | 1821 | 7.90659376526 |
| NM_022080 | NAPB    | 3521 | 3600 | 8.62997230298 |
| NM_022080 | NAPB    | 1506 | 1554 | 6.30402660792 |
| NM_018979 | WNK1    | 7486 | 7567 | 4.38724109796 |
| NM_018979 | WNK1    | 9524 | 9588 | 5.97220359868 |
| NM_018979 | WNK1    | 5236 | 5293 | 6.70916919284 |
| NM_018979 | WNK1    | 7376 | 7426 | 5.30310188857 |
| NM_018979 | WNK1    | 265  | 338  | 6.70916919284 |
| NM_018979 | WNK1    | 2489 | 2549 | 4.38322349778 |
| NM_018979 | WNK1    | 2576 | 2632 | 5.97220359868 |
| NM_018979 | WNK1    | 9596 | 9639 | 5.38322349778 |
| NM_018979 | WNK1    | 5379 | 5435 | 4.3872343669  |
| NM_018979 | WNK1    | 4387 | 4445 | 5.30310188857 |
| NM_018979 | WNK1    | 7802 | 7832 | 5.30310188857 |
| NM_018979 | WNK1    | 2248 | 2289 | 4.3872343669  |
| NM_018979 | WNK1    | 9663 | 9771 | 5.97220359868 |
| NM_018979 | WNK1    | 8132 | 8253 | 5.38724109796 |
| NM_018979 | WNK1    | 2040 | 2153 | 6.70916919284 |
| NM_018979 | WNK1    | 1583 | 1788 | 6.97220359868 |
| NM_018979 | WNK1    | 5516 | 5638 | 7.38724109796 |

|           |          |       |       |               |               |
|-----------|----------|-------|-------|---------------|---------------|
| NM_018979 | WNK1     | 3818  | 3856  | 4.38724109795 |               |
| NM_018979 | WNK1     | 1969  | 2003  | 5.38322349778 |               |
| NM_018979 | WNK1     | 6051  | 6095  | 5.97202984836 |               |
| NM_018979 | WNK1     | 3885  | 4071  | 7.38724109796 |               |
| NM_018979 | WNK1     | 4473  | 4665  | 7.38724109796 |               |
| NM_018979 | WNK1     | 10127 | 10256 | 6.38724109796 |               |
| NM_018979 | WNK1     | 5778  | 5839  | 5.38706734764 |               |
| NM_018979 | WNK1     | 8062  | 8131  | 4.3872343669  |               |
| NM_018979 | WNK1     | 4103  | 4310  | 7.38724109796 |               |
| NM_018979 | WNK1     | 1808  | 1967  | 7.5571660994  |               |
| NM_018979 | WNK1     | 851   | 978   | 6.38724109796 |               |
| NM_018979 | WNK1     | 6812  | 6929  | 6.70916919284 |               |
| NM_018979 | WNK1     | 8608  | 8771  | 6.38724109796 |               |
| NM_018979 | WNK1     | 6433  | 6651  | 7.97220359868 |               |
| NM_018979 | WNK1     | 10318 | 10435 | 5.38724109796 |               |
| NM_018979 | WNK1     | 5940  | 6008  | 4.38322349778 |               |
| NM_018979 | WNK1     | 8262  | 8524  | 6.97220359868 |               |
| NM_018979 | WNK1     | 4915  | 5016  | 6.97220359868 |               |
| NM_018979 | WNK1     | 6235  | 6325  | 5.38322349778 |               |
| NM_018979 | WNK1     | 2331  | 2381  | 4.38322349778 |               |
| NM_018979 | WNK1     | 10042 | 10122 | 5.97220359868 |               |
| NM_018979 | WNK1     | 1467  | 1581  | 8.47470393921 |               |
| NM_018979 | WNK1     | 1221  | 1460  | 8.0876808161  |               |
| NM_015492 | C15orf39 |       | 2288  | 2359          | 9.48970975861 |
| NM_015492 | C15orf39 |       | 3005  | 3057          | 8.48569239436 |
| NM_015496 | KIAA1429 |       | 2413  | 2476          | 7.13621115441 |
| NM_015496 | KIAA1429 |       | 3591  | 3669          | 7.47112704448 |
| NM_015496 | KIAA1429 |       | 4177  | 4219          | 6.55509250354 |
| NM_015496 | KIAA1429 |       | 2214  | 2279          | 6.55509250354 |
| NM_015496 | KIAA1429 |       | 3927  | 4017          | 6.55526625386 |
| NM_015496 | KIAA1429 |       | 382   | 438           | 7.55509250354 |
| NM_015496 | KIAA1429 |       | 1655  | 1734          | 6.55526625386 |
| NM_015496 | KIAA1429 |       | 3081  | 3140          | 7.55525952281 |
| NM_015496 | KIAA1429 |       | 3380  | 3439          | 6.55526601794 |
| NM_015496 | KIAA1429 |       | 2982  | 3040          | 5.55124865369 |
| NM_015496 | KIAA1429 |       | 4627  | 4751          | 7.14022874703 |
| NM_015497 | TMEM87A  | 790   | 829   | 6.14186241922 |               |
| NM_015497 | TMEM87A  | 370   | 468   | 8.14186241944 |               |
| NM_015497 | TMEM87A  | 2045  | 2121  | 7.72682492016 |               |
| NM_015497 | TMEM87A  | 1514  | 1575  | 7.14186241944 |               |
| NM_015497 | TMEM87A  | 2124  | 2186  | 6.72682468424 |               |
| NM_015497 | TMEM87A  | 1587  | 1723  | 6.72682492016 |               |
| NM_015497 | TMEM87A  | 1040  | 1348  | 8.60129403808 |               |
| NM_015497 | TMEM87A  | 468   | 708   | 9.14186241944 |               |
| NM_015497 | TMEM87A  | 1364  | 1510  | 8.31178742088 |               |
| NM_015497 | TMEM87A  | 1905  | 2010  | 7.14186241944 |               |
| NM_015497 | TMEM87A  | 152   | 278   | 7.9492173415  |               |
| NM_015497 | TMEM87A  | 1757  | 1874  | 7.46379051433 |               |
| NM_015497 | TMEM87A  | 884   | 1040  | 8.84230213758 |               |
| NM_018975 | TERF2IP  | 620   | 688   | 4.75623882843 |               |

|              |              |      |               |               |
|--------------|--------------|------|---------------|---------------|
| NM_020827    | KIAA1430     | 3064 | 3104          | 6.26674663987 |
| NM_020825    | CRAMP1L 6332 | 6388 | 7.98055384519 |               |
| NM_020825    | CRAMP1L 6392 | 6474 | 8.98457144536 |               |
| NM_020825    | CRAMP1L 5188 | 5253 | 7.90043223598 |               |
| NM_020825    | CRAMP1L 4156 | 4216 | 7.90043223598 |               |
| NM_020824    | ARHGAP21     | 5265 | 5309          | 7.97959736639 |
| NM_020824    | ARHGAP21     | 6897 | 6959          | 7.97977111671 |
| NM_020824    | ARHGAP21     | 5525 | 5573          | 6.39480188494 |
| NM_020824    | ARHGAP21     | 7000 | 7054          | 7.39480860844 |
| NM_020824    | ARHGAP21     | 1561 | 1672          | 8.39480838007 |
| NM_020824    | ARHGAP21     | 437  | 510           | 6.39079101582 |
| NM_020824    | ARHGAP21     | 81   | 195           | 7.97977111671 |
| NM_020823    | TMEM181 468  | 586  | 7.76370986193 |               |
| NM_020823    | TMEM181 2230 | 2290 | 6.30427824329 |               |
| NM_020823    | TMEM181 4356 | 4420 | 4.22013903391 |               |
| NM_020823    | TMEM181 1879 | 1924 | 6.62603258786 |               |
| NM_020823    | TMEM181 4209 | 4272 | 5.30026064312 |               |
| NM_020823    | TMEM181 1255 | 1318 | 6.88924074401 |               |
| NM_020823    | TMEM181 3215 | 3278 | 4.22013903391 |               |
| NM_020823    | TMEM181 3582 | 3635 | 5.8890669937  |               |
| NM_020823    | TMEM181 3150 | 3204 | 4.30427151224 |               |
| NM_020823    | TMEM181 3805 | 3869 | 5.88924074401 |               |
| NM_020823    | TMEM181 632  | 842  | 7.47420324473 |               |
| NM_020823    | TMEM181 1725 | 1825 | 6.62620633818 |               |
| NM_020823    | TMEM181 4872 | 4987 | 5.30427824329 |               |
| NM_020823    | TMEM181 3355 | 3468 | 6.30427824329 |               |
| NM_020823    | TMEM181 1355 | 1703 | 8.76370986193 |               |
| NM_020823    | TMEM181 5037 | 5115 | 5.88924074401 |               |
| NM_020823    | TMEM181 1044 | 1228 | 6.88924074401 |               |
| NM_020823    | TMEM181 844  | 1008 | 8.2111688389  |               |
| NM_020823    | TMEM181 3929 | 4044 | 5.88924074401 |               |
| NM_020823    | TMEM181 2325 | 2444 | 5.30427824329 |               |
| NM_001645    | APOC1 383    | 432  | 4.27124578226 |               |
| NM_001645    | APOC1 60     | 376  | 8.48069914788 |               |
| NM_001643    | APOA2 0      | 466  | 5.36202829027 |               |
| NM_001640    | APEH 2275    | 2368 | 7.37391213496 |               |
| NM_001640    | APEH 1938    | 2036 | 8.37391237087 |               |
| NM_001640    | APEH 1821    | 1867 | 6.78493226998 |               |
| NM_001640    | APEH 1058    | 1101 | 6.78894986993 |               |
| NM_001640    | APEH 1326    | 1387 | 6.7889431391  |               |
| NM_001640    | APEH 1244    | 1320 | 5.7889431391  |               |
| NM_001640    | APEH 1556    | 1636 | 5.7889431391  |               |
| NM_001640    | APEH 1392    | 1495 | 6.78894987015 |               |
| NM_020770    | CGN 844      | 920  | 8.47583460627 |               |
| NM_020770    | CGN 3033     | 3109 | 8.47182373715 |               |
| NM_001204180 | ZHX1-C80RF76 | 404  | 481           | 7.58925943872 |
| NM_001204180 | ZHX1-C80RF76 | 897  | 953           | 9.91520512623 |
| NM_020778    | ALPK3 5458   | 5546 | 15.5831580196 |               |
| NM_020778    | ALPK3 6399   | 6460 | 13.5831580198 |               |
| NM_020778    | ALPK3 5934   | 5991 | 13.5791404196 |               |

|              |              |       |       |               |
|--------------|--------------|-------|-------|---------------|
| NM_020778    | ALPK3        | 10487 | 10559 | 15.9050861071 |
| NM_020778    | ALPK3        | 8821  | 8849  | 13.5829842695 |
| NM_020778    | ALPK3        | 7631  | 7704  | 15.1681205205 |
| NM_020778    | ALPK3        | 6782  | 6835  | 13.5831512887 |
| NM_020778    | ALPK3        | 5275  | 5308  | 13.5831512887 |
| NM_020778    | ALPK3        | 5139  | 5217  | 14.5831580198 |
| NM_020778    | ALPK3        | 10823 | 10890 | 14.5831512887 |
| NM_001199781 | POC1B-GALNT4 | 495   | 563   | 9.94759014983 |
| NM_001199781 | POC1B-GALNT4 | 2776  | 2876  | 7.94776390014 |
| NM_001199781 | POC1B-GALNT4 | 867   | 905   | 8.94374629997 |
| NM_001199781 | POC1B-GALNT4 | 3228  | 3281  | 7.94374629997 |
| NM_001199781 | POC1B-GALNT4 | 2742  | 2772  | 8.86362469076 |
| NM_001199781 | POC1B-GALNT4 | 1590  | 1656  | 9.53272640087 |
| NM_001199781 | POC1B-GALNT4 | 1494  | 1537  | 7.94775716909 |
| NM_001199781 | POC1B-GALNT4 | 1952  | 2033  | 8.94776390014 |
| NM_001199781 | POC1B-GALNT4 | 1258  | 1356  | 8.94776390014 |
| NM_001199781 | POC1B-GALNT4 | 5375  | 5484  | 7.94775716909 |
| NM_001199781 | POC1B-GALNT4 | 1657  | 1800  | 10.5327264009 |
| NM_032870    | PNISR        | 2974  | 3035  | 2.90237198495 |
| NM_032870    | PNISR        | 2863  | 2929  | 2.90237198472 |
| NM_032870    | PNISR        | 3046  | 3109  | 3.9023719774  |
| NM_032870    | PNISR        | 3140  | 3218  | 3.90237198495 |
| NM_001143944 | LEMD2        | 2181  | 2228  | 5.95768243686 |
| NM_001143944 | LEMD2        | 1451  | 1539  | 5.95768916791 |
| NM_001143944 | LEMD2        | 168   | 206   | 5.87354995853 |
| NM_001143944 | LEMD2        | 288   | 314   | 5.95367156774 |
| NM_001143944 | LEMD2        | 885   | 930   | 5.95367156774 |
| NM_001143944 | LEMD2        | 346   | 528   | 8.95768916791 |
| NM_001143944 | LEMD2        | 535   | 786   | 8.12761416935 |
| NM_032876    | JUB          | 1981  | 2035  | 5.82200192165 |
| NM_032876    | JUB          | 1847  | 1946  | 8.14410376686 |
| NM_032876    | JUB          | 2708  | 2764  | 5.73803646259 |
| NM_032876    | JUB          | 380   | 468   | 5.8181580718  |
| NM_032876    | JUB          | 2858  | 2925  | 5.82217566442 |
| NM_032876    | JUB          | 2293  | 2386  | 7.82217567197 |
| NM_032876    | JUB          | 2116  | 2176  | 7.40713817247 |
| NM_032876    | JUB          | 2788  | 2855  | 7.40713144164 |
| NM_032876    | JUB          | 1501  | 1618  | 8.40713817269 |
| NM_016604    | KDM3B        | 3259  | 3332  | 7.45333930711 |
| NM_016604    | KDM3B        | 5288  | 5337  | 6.86837703476 |
| NM_016604    | KDM3B        | 3339  | 3377  | 7.86837703476 |
| NM_016604    | KDM3B        | 558   | 644   | 6.86837704231 |
| NM_016604    | KDM3B        | 3716  | 3789  | 5.86837704231 |
| NM_016604    | KDM3B        | 5894  | 5953  | 5.86435944214 |
| NM_016604    | KDM3B        | 4244  | 4304  | 5.86837703476 |
| NM_016604    | KDM3B        | 4637  | 4692  | 7.45333954281 |
| NM_016604    | KDM3B        | 3958  | 4053  | 6.86837704231 |
| NM_016604    | KDM3B        | 6551  | 6616  | 5.86837680639 |
| NM_016604    | KDM3B        | 6633  | 6722  | 6.86820329199 |
| NM_016604    | KDM3B        | 4501  | 4567  | 8.1903051372  |

|              |          |      |      |                   |
|--------------|----------|------|------|-------------------|
| NM_016604    | KDM3B    | 3589 | 3628 | 5.78423783293     |
| NM_016604    | KDM3B    | 2799 | 2895 | 5.86837704231     |
| NM_016604    | KDM3B    | 3087 | 3162 | 5.86837704231     |
| NM_016604    | KDM3B    | 1685 | 1809 | 8.86837704231     |
| NM_016604    | KDM3B    | 2449 | 2534 | 7.45333281198     |
| NM_016604    | KDM3B    | 1812 | 1897 | 5.86837704231     |
| NM_016604    | KDM3B    | 651  | 725  | 6.86435944214     |
| NM_016604    | KDM3B    | 384  | 483  | 7.45333954303     |
| NM_016604    | KDM3B    | 2580 | 2676 | 7.86837704231     |
| NM_016604    | KDM3B    | 3448 | 3520 | 7.45333930711     |
| NM_016604    | KDM3B    | 2897 | 3044 | 5.86837704231     |
| NM_001143947 | UNC93A   | 759  | 877  | 9.32373636375     |
| NM_001143947 | UNC93A   | 1793 | 1864 | 7.20825891042     |
| NM_001143947 | UNC93A   | 1572 | 1626 | 5.6231228953      |
| NM_001143947 | UNC93A   | 1202 | 1237 | 5.6231228953      |
| NM_001143947 | UNC93A   | 56   | 113  | 7.62329664561     |
| NM_001143947 | UNC93A   | 1351 | 1397 | 5.62328991456     |
| NM_001143947 | UNC93A   | 882  | 979  | 8.62329664561     |
| NM_001143947 | UNC93A   | 137  | 252  | 8.20825914633     |
| NM_001143947 | UNC93A   | 1258 | 1343 | 8.20825914633     |
| NM_001143947 | UNC93A   | 320  | 506  | 9.43065156767     |
| NM_001143947 | UNC93A   | 510  | 595  | 7.20825914633     |
| NM_001143947 | UNC93A   | 607  | 719  | 8.43065156767     |
| NM_001143947 | UNC93A   | 1468 | 1549 | 7.9452247405      |
| NM_001143947 | UNC93A   | 979  | 1137 | 8.79322164706     |
| NM_032878    | ALKBH6   | 423  | 479  | 9.74445831778     |
| NM_032878    | ALKBH6   | 216  | 297  | 10.7444583105     |
| NM_001143667 | ZBED5    | 1770 | 1862 | 8.85064464763     |
| NM_001008747 | CTAGE15P |      | 186  | 235 10.2011098714 |
| NM_001198838 | RBM12    | 2051 | 2149 | 6.96331736746     |
| NM_001198838 | RBM12    | 1659 | 1708 | 5.37835486652     |
| NM_001198838 | RBM12    | 1874 | 1903 | 5.37818111643     |
| NM_001198838 | RBM12    | 449  | 529  | 5.37835463083     |
| NM_001198838 | RBM12    | 2824 | 2893 | 6.37433726657     |
| NM_001198838 | RBM12    | 405  | 448  | 6.96314361715     |
| NM_001198838 | RBM12    | 3051 | 3107 | 5.37835486674     |
| NM_001198838 | RBM12    | 638  | 693  | 5.37433726657     |
| NM_001198838 | RBM12    | 310  | 379  | 5.37835485919     |
| NM_001198838 | RBM12    | 157  | 227  | 6.37433726657     |
| NM_001198838 | RBM12    | 2534 | 2592 | 5.37835486674     |
| NM_001198838 | RBM12    | 1213 | 1379 | 7.70028296163     |
| NM_001198838 | RBM12    | 991  | 1154 | 5.37835486674     |
| NM_001198838 | RBM12    | 227  | 281  | 6.37433726657     |
| NM_001198838 | RBM12    | 1547 | 1641 | 5.37834813569     |
| NM_018281    | ECHDC2   | 220  | 272  | 6.61510128887     |
| NM_018281    | ECHDC2   | 1003 | 1060 | 6.61911865312     |
| NM_001198780 | ARPC4    | 928  | 983  | 7.0477686812      |
| NM_001198780 | ARPC4    | 791  | 872  | 8.63273118215     |
| NM_001198780 | ARPC4    | 1056 | 1122 | 7.63272445109     |
| NM_001198780 | ARPC4    | 227  | 302  | 7.63273118215     |



|              |          |      |      |                    |
|--------------|----------|------|------|--------------------|
| NM_001198780 | ARPC4    | 114  | 188  | 8.36969677631      |
| NM_001198780 | ARPC4    | 532  | 616  | 8.36969677631      |
| NM_144973    | DENND5B  | 3856 | 3875 | 5.94866293363      |
| NM_144973    | DENND5B  | 1643 | 1712 | 6.02878454284      |
| NM_144973    | DENND5B  | 1162 | 1211 | 6.94866293363      |
| NM_144973    | DENND5B  | 5798 | 5831 | 6.02878454284      |
| NM_144976    | ZNF564   | 1360 | 1428 | 9.86770114108      |
| NM_181307    | MRPL52   | 114  | 174  | 1.52480454235      |
| NM_181307    | MRPL52   | 187  | 280  | 3.84673936829      |
| NM_001164280 | SLC37A4  | 1885 | 1939 | 6.66428060149      |
| NM_001164280 | SLC37A4  | 700  | 815  | 10.7519171931      |
| NM_001164280 | SLC37A4  | 1368 | 1420 | 6.66043675164      |
| NM_001164280 | SLC37A4  | 961  | 1032 | 8.24941661661      |
| NM_001164280 | SLC37A4  | 867  | 961  | 10.1238859704      |
| NM_001164280 | SLC37A4  | 1632 | 1807 | 10.36489407        |
| NM_001164280 | SLC37A4  | 1421 | 1516 | 7.66445435181      |
| NM_001164280 | SLC37A4  | 1952 | 2045 | 8.24941685253      |
| NM_001164280 | SLC37A4  | 1063 | 1244 | 10.2494168525      |
| NM_001164280 | SLC37A4  | 1588 | 1632 | 6.58031514243      |
| NM_001164280 | SLC37A4  | 96   | 616  | 12.36489407        |
| NM_007146    | VEZF1    | 4211 | 4275 | 6.51270297489      |
| NM_007146    | VEZF1    | 3664 | 3714 | 5.51270297489      |
| NM_007146    | VEZF1    | 2802 | 2870 | 7.09766547561      |
| NM_007146    | VEZF1    | 1299 | 1361 | 7.09382162576      |
| NM_007146    | VEZF1    | 2382 | 2440 | 5.51287648929      |
| NM_007146    | VEZF1    | 3406 | 3487 | 6.51286999416      |
| NM_007146    | VEZF1    | 1815 | 1911 | 7.51287672521      |
| NM_007145    | ZNF146   | 859  | 916  | 8.28174411537      |
| NM_007145    | ZNF146   | 1240 | 1289 | 5.95964227016      |
| NM_007145    | ZNF146   | 3650 | 3738 | 7.95981602048      |
| NM_007145    | ZNF146   | 1974 | 2032 | 6.95964227016      |
| NM_007145    | ZNF146   | 765  | 852  | 7.5447785212       |
| NM_007145    | ZNF146   | 2515 | 2587 | 5.95964227016      |
| NM_007145    | ZNF146   | 1050 | 1200 | 9.41924763912      |
| NM_007145    | ZNF146   | 1357 | 1445 | 5.95980928943      |
| NM_007145    | ZNF146   | 933  | 1017 | 5.95980928943      |
| NM_001164283 | TRAF3IP2 |      | 2052 | 2089 8.0031140474  |
| NM_001084393 | DDTL     | 113  | 326  | 10.1149574212      |
| NM_001242886 | DDC      | 1004 | 1045 | 6.55660457198      |
| NM_001242886 | DDC      | 1062 | 1101 | 7.55677159125      |
| NM_001242886 | DDC      | 1152 | 1222 | 7.14173409197      |
| NM_001242886 | DDC      | 307  | 396  | 6.55677832229      |
| NM_001242886 | DDC      | 879  | 946  | 6.55276072213      |
| NM_001242886 | DDC      | 56   | 119  | 7.1417408228       |
| NM_001242886 | DDC      | 654  | 768  | 8.14174082302      |
| NM_030650    | KIAA1715 |      | 99   | 157 4.40967959614  |
| NM_030650    | KIAA1715 |      | 1232 | 1270 5.40566872702 |
| NM_030650    | KIAA1715 |      | 665  | 718 5.40566872702  |
| NM_030650    | KIAA1715 |      | 5415 | 5468 5.40566872702 |
| NM_030650    | KIAA1715 |      | 2201 | 2239 4.40566872702 |

|              |          |      |      |      |               |
|--------------|----------|------|------|------|---------------|
| NM_030650    | KIAA1715 |      | 363  | 425  | 6.40968632719 |
| NM_030650    | KIAA1715 |      | 2253 | 2291 | 4.40566872702 |
| NM_030650    | KIAA1715 |      | 2362 | 2409 | 4.40566872702 |
| NM_030650    | KIAA1715 |      | 580  | 664  | 6.40968632719 |
| NM_030650    | KIAA1715 |      | 189  | 259  | 4.40566872702 |
| NM_030650    | KIAA1715 |      | 1026 | 1143 | 7.57961132864 |
| NM_030650    | KIAA1715 |      | 1435 | 1491 | 5.99063122774 |
| NM_030650    | KIAA1715 |      | 272  | 359  | 5.40968632697 |
| NM_030650    | KIAA1715 |      | 1310 | 1401 | 5.40968632719 |
| NM_203500    | KEAP1    | 1321 | 1392 |      | 6.87096933942 |
| NM_203500    | KEAP1    | 931  | 981  |      | 6.28600683869 |
| NM_203500    | KEAP1    | 2110 | 2160 |      | 5.28583308838 |
| NM_203500    | KEAP1    | 1172 | 1213 |      | 6.20186762932 |
| NM_203500    | KEAP1    | 515  | 561  |      | 6.20186762932 |
| NM_203500    | KEAP1    | 158  | 185  |      | 5.20186762932 |
| NM_203500    | KEAP1    | 1226 | 1267 |      | 6.28600010765 |
| NM_203500    | KEAP1    | 1896 | 1956 |      | 5.28600683115 |
| NM_203500    | KEAP1    | 635  | 722  |      | 8.09336176076 |
| NM_203500    | KEAP1    | 814  | 916  |      | 5.2860068387  |
| NM_203500    | KEAP1    | 2364 | 2425 |      | 6.86695173925 |
| NM_203500    | KEAP1    | 1714 | 1845 |      | 8.60793493359 |
| NM_203500    | KEAP1    | 986  | 1116 |      | 8.2860068387  |
| NM_003860    | BANF1    | 936  | 985  |      | 8.08460141361 |
| NM_003860    | BANF1    | 653  | 721  |      | 8.66956415025 |
| NM_003860    | BANF1    | 1053 | 1113 |      | 7.08460164953 |
| NM_003860    | BANF1    | 457  | 519  |      | 7.6695574192  |
| NM_003860    | BANF1    | 863  | 904  |      | 8.40652974442 |
| NM_003860    | BANF1    | 727  | 792  |      | 8.40652974442 |
| NM_003861    | DCAF5    | 1800 | 1865 |      | 7.17367735994 |
| NM_003861    | DCAF5    | 599  | 669  |      | 8.17385111025 |
| NM_003861    | DCAF5    | 2363 | 2457 |      | 6.17367735994 |
| NM_003861    | DCAF5    | 3197 | 3245 |      | 6.16983351008 |
| NM_003861    | DCAF5    | 1160 | 1224 |      | 7.16983351008 |
| NM_003861    | DCAF5    | 1298 | 1378 |      | 8.1738443792  |
| NM_003861    | DCAF5    | 1045 | 1160 |      | 7.75881361097 |
| NM_003343    | UBE2G2   | 2836 | 2915 |      | 4.772301715   |
| NM_003343    | UBE2G2   | 548  | 607  |      | 5.772301715   |
| NM_003343    | UBE2G2   | 1776 | 1827 |      | 5.77230194337 |
| NM_003343    | UBE2G2   | 1698 | 1770 |      | 5.77230195092 |
| NM_003343    | UBE2G2   | 156  | 202  |      | 6.77212820061 |
| NM_003343    | UBE2G2   | 2745 | 2802 |      | 4.68816274154 |
| NM_003343    | UBE2G2   | 2050 | 2186 |      | 7.35726445164 |
| NM_003343    | UBE2G2   | 2219 | 2294 |      | 4.7723019507  |
| NM_003343    | UBE2G2   | 444  | 530  |      | 4.7723019507  |
| NM_003343    | UBE2G2   | 1482 | 1627 |      | 4.77230195092 |
| NM_003343    | UBE2G2   | 647  | 782  |      | 7.35726445164 |
| NM_001134382 | IQSEC1   | 4877 | 4922 |      | 7.39433333127 |
| NM_001134382 | IQSEC1   | 2273 | 2347 |      | 4.80936409951 |
| NM_001134382 | IQSEC1   | 752  | 793  |      | 4.80535323039 |
| NM_001134382 | IQSEC1   | 4624 | 4711 |      | 5.72523162118 |

|              |         |      |      |               |
|--------------|---------|------|------|---------------|
| NM_001134382 | IQSEC1  | 5631 | 5708 | 4.80535323039 |
| NM_001134382 | IQSEC1  | 1994 | 2070 | 5.80936409951 |
| NM_001134382 | IQSEC1  | 1083 | 1147 | 4.80535323039 |
| NM_001134382 | IQSEC1  | 5278 | 5330 | 4.72523162118 |
| NM_138769    | RHOT2   | 135  | 203  | 5.92114252164 |
| NM_138769    | RHOT2   | 961  | 1023 | 6.92516012181 |
| NM_138769    | RHOT2   | 2290 | 2330 | 5.84102091243 |
| NM_138769    | RHOT2   | 1849 | 1893 | 5.84102091243 |
| NM_138769    | RHOT2   | 2339 | 2398 | 5.92515339076 |
| NM_138769    | RHOT2   | 2417 | 2531 | 7.92516012181 |
| NM_138769    | RHOT2   | 683  | 811  | 6.92516012181 |
| NM_138769    | RHOT2   | 330  | 375  | 6.92114252164 |
| NM_138769    | RHOT2   | 1185 | 1269 | 5.92516012159 |
| NM_024078    | NOC4L   | 1191 | 1239 | 10.1750859413 |
| NM_024078    | NOC4L   | 954  | 1067 | 10.760055173  |
| NM_001135036 | FAM18B2 | 332  | 465  | 10.4014343877 |
| NM_001135036 | FAM18B2 | 1750 | 1833 | 7.40143438766 |
| NM_001135036 | FAM18B2 | 468  | 581  | 9.20878930972 |
| NM_001135036 | FAM18B2 | 247  | 332  | 7.40143415174 |
| NM_001135036 | FAM18B2 | 3037 | 3201 | 8.40143438766 |
| NM_003347    | UBE2L3  | 706  | 782  | 5.62587518971 |
| NM_003347    | UBE2L3  | 2111 | 2156 | 5.30394709483 |
| NM_003347    | UBE2L3  | 970  | 1019 | 3.29992949465 |
| NM_003347    | UBE2L3  | 1769 | 1828 | 5.62587518971 |
| NM_003347    | UBE2L3  | 404  | 459  | 3.30377334451 |
| NM_003347    | UBE2L3  | 2467 | 2624 | 6.11130201688 |
| NM_003347    | UBE2L3  | 552  | 689  | 6.62587518971 |
| NM_003347    | UBE2L3  | 814  | 890  | 4.30394709482 |
| NM_003347    | UBE2L3  | 1854 | 1914 | 4.30394709483 |
| NM_003347    | UBE2L3  | 2162 | 2258 | 4.88890959555 |
| NM_003347    | UBE2L3  | 1266 | 1368 | 5.88890959555 |
| NM_003347    | UBE2L3  | 184  | 362  | 6.30394709483 |
| NM_000110    | DPYD    | 201  | 242  | 7.88947739004 |
| NM_000110    | DPYD    | 465  | 560  | 8.89348825916 |
| NM_000113    | TOR1A   | 516  | 564  | 7.55887774094 |
| NM_000113    | TOR1A   | 145  | 177  | 5.15281043689 |
| NM_000113    | TOR1A   | 765  | 807  | 7.23694291522 |
| NM_000113    | TOR1A   | 809  | 841  | 6.2329320461  |
| NM_000113    | TOR1A   | 700  | 761  | 7.55887774116 |
| NM_000113    | TOR1A   | 241  | 306  | 7.23694964627 |
| NM_000113    | TOR1A   | 917  | 996  | 6.82191214699 |
| NM_000113    | TOR1A   | 626  | 671  | 6.15281043689 |
| NM_000113    | TOR1A   | 398  | 458  | 5.23694963872 |
| NM_000113    | TOR1A   | 1367 | 1568 | 8.04430456833 |
| NM_000112    | SLC26A2 | 2806 | 2856 | 10.8903503854 |
| NM_000112    | SLC26A2 | 675  | 709  | 10.8903503854 |
| NM_000112    | SLC26A2 | 1803 | 1845 | 12.4793302503 |
| NM_000112    | SLC26A2 | 5498 | 5566 | 10.8943612545 |
| NM_000112    | SLC26A2 | 4445 | 4481 | 10.8941942352 |
| NM_000112    | SLC26A2 | 1081 | 1137 | 12.4791567359 |

|              |          |      |      |               |               |
|--------------|----------|------|------|---------------|---------------|
| NM_000112    | SLC26A2  | 1380 | 1488 | 13.2162960729 |               |
| NM_144607    | CYB5D1   | 3428 | 3471 | 7.53163708941 |               |
| NM_144604    | ZC3H18   | 1314 | 1377 | 5.38906375149 |               |
| NM_144604    | ZC3H18   | 1812 | 1913 | 6.39308135167 |               |
| NM_144604    | ZC3H18   | 1148 | 1270 | 5.39308135144 |               |
| NM_001080392 | KIAA1147 |      | 4871 | 4922          | 9.74481015171 |
| NM_001080392 | KIAA1147 |      | 967  | 1033          | 10.1598476512 |
| NM_001080392 | KIAA1147 |      | 6292 | 6360          | 9.15984765121 |
| NM_001080392 | KIAA1147 |      | 4142 | 4182          | 8.07570844183 |
| NM_001080392 | KIAA1147 |      | 2053 | 2109          | 10.1598476512 |
| NM_001080392 | KIAA1147 |      | 388  | 476           | 9.15984765121 |
| NM_001080392 | KIAA1147 |      | 2573 | 2640          | 9.15984765121 |
| NM_001080392 | KIAA1147 |      | 6957 | 7037          | 9.15984764366 |
| NM_001080392 | KIAA1147 |      | 2924 | 2990          | 9.74481015193 |
| NM_001080392 | KIAA1147 |      | 6369 | 6423          | 8.15984741529 |
| NM_001080392 | KIAA1147 |      | 1801 | 1844          | 9.74463640162 |
| NM_001080392 | KIAA1147 |      | 4296 | 4425          | 10.7448101519 |
| NM_001080392 | KIAA1147 |      | 876  | 959           | 9.15984092016 |
| NM_001080392 | KIAA1147 |      | 3075 | 3139          | 8.15583005104 |
| NM_001080392 | KIAA1147 |      | 1144 | 1235          | 8.15984765099 |
| NM_001080392 | KIAA1147 |      | 1630 | 1714          | 10.4817757461 |
| NM_001080392 | KIAA1147 |      | 6787 | 6858          | 8.15984741529 |
| NM_001080392 | KIAA1147 |      | 645  | 713           | 9.15984765121 |
| NM_001080392 | KIAA1147 |      | 5363 | 5440          | 9.1596739009  |
| NM_001080392 | KIAA1147 |      | 1870 | 1969          | 9.74481015193 |
| NM_001080392 | KIAA1147 |      | 2351 | 2447          | 9.15583005104 |
| NM_001080392 | KIAA1147 |      | 4448 | 4552          | 9.74481015193 |
| NM_003348    | UBE2N    | 1302 | 1353 | 3.92299762863 |               |
| NM_003348    | UBE2N    | 653  | 730  | 2.92299089758 |               |
| NM_003348    | UBE2N    | 1390 | 1491 | 4.92299762108 |               |
| NM_003348    | UBE2N    | 357  | 441  | 4.92299762841 |               |
| NM_001080398 | KIAA0368 |      | 3024 | 3079          | 4.37499693945 |
| NM_001080398 | KIAA0368 |      | 5918 | 5962          | 4.37499693945 |
| NM_001080398 | KIAA0368 |      | 5006 | 5050          | 5.96013295457 |
| NM_001080398 | KIAA0368 |      | 675  | 722           | 4.37517068955 |
| NM_001080398 | KIAA0368 |      | 5213 | 5264          | 4.37115308959 |
| NM_001080398 | KIAA0368 |      | 1581 | 1615          | 6.29103148038 |
| NM_001080398 | KIAA0368 |      | 5757 | 5825          | 6.37517068222 |
| NM_001080398 | KIAA0368 |      | 4719 | 4783          | 5.37517068977 |
| NM_001080398 | KIAA0368 |      | 4002 | 4103          | 5.96013319049 |
| NM_001080398 | KIAA0368 |      | 969  | 1064          | 6.37517068977 |
| NM_001080398 | KIAA0368 |      | 5352 | 5449          | 5.96012645944 |
| NM_001080398 | KIAA0368 |      | 4559 | 4658          | 4.37517068977 |
| NM_001080398 | KIAA0368 |      | 4827 | 4938          | 5.96013319048 |
| NM_001080398 | KIAA0368 |      | 5490 | 5567          | 4.37115308959 |
| NM_001080398 | KIAA0368 |      | 3548 | 3618          | 5.96013295457 |
| NM_001080398 | KIAA0368 |      | 1772 | 1852          | 6.37517068222 |
| NM_001080398 | KIAA0368 |      | 2775 | 2883          | 4.37516395871 |
| NM_001080398 | KIAA0368 |      | 3627 | 3733          | 5.96013319049 |
| NM_001080398 | KIAA0368 |      | 3157 | 3208          | 4.37517068222 |

|              |           |      |      |               |               |
|--------------|-----------|------|------|---------------|---------------|
| NM_001205206 | SLC19A1   | 1579 | 1649 | 9.63936815549 |               |
| NM_001205206 | SLC19A1   | 645  | 734  | 8.3174400606  |               |
| NM_001205206 | SLC19A1   | 735  | 783  | 8.31342246043 |               |
| NM_001205206 | SLC19A1   | 1448 | 1486 | 7.31342246043 |               |
| NM_001205206 | SLC19A1   | 1235 | 1440 | 11.4049029019 |               |
| NM_001205206 | SLC19A1   | 795  | 911  | 8.90240256133 |               |
| NM_001205206 | SLC19A1   | 510  | 568  | 8.90240256133 |               |
| NM_001205206 | SLC19A1   | 260  | 502  | 8.90240256133 |               |
| NM_001205206 | SLC19A1   | 111  | 231  | 9.90240256133 |               |
| NM_001205206 | SLC19A1   | 948  | 1066 | 9.3174400606  |               |
| NM_176096    | CDK5RAP3  |      | 1725 | 1780          | 4.66644013638 |
| NM_176096    | CDK5RAP3  |      | 1470 | 1530          | 4.67045773633 |
| NM_176096    | CDK5RAP3  |      | 988  | 1079          | 4.67045773656 |
| NM_176096    | CDK5RAP3  |      | 1557 | 1663          | 3.67045773656 |
| NM_176096    | CDK5RAP3  |      | 483  | 574           | 4.67045773656 |
| NM_176096    | CDK5RAP3  |      | 1104 | 1159          | 3.6704510055  |
| NM_016224    | SNX9      | 288  | 333  | 4.64299978255 |               |
| NM_016224    | SNX9      | 334  | 387  | 3.64300627768 |               |
| NM_016224    | SNX9      | 1129 | 1160 | 3.55886730422 |               |
| NM_016224    | SNX9      | 2880 | 2935 | 3.64299978255 |               |
| NM_001001998 | EXOSC10   | 1450 | 1503 | 4.55657640211 |               |
| NM_001001998 | EXOSC10   | 986  | 1082 | 5.878504497   |               |
| NM_001001998 | EXOSC10   | 1612 | 1712 | 5.14153890283 |               |
| NM_001001998 | EXOSC10   | 547  | 578  | 4.55640265179 |               |
| NM_001001998 | EXOSC10   | 912  | 975  | 6.14153890283 |               |
| NM_001001998 | EXOSC10   | 1385 | 1434 | 3.55656967106 |               |
| NM_001001998 | EXOSC10   | 321  | 471  | 5.878504497   |               |
| NM_001001998 | EXOSC10   | 1151 | 1367 | 7.01600802075 |               |
| NM_001001998 | EXOSC10   | 1804 | 1907 | 5.14153890283 |               |
| NM_001001998 | EXOSC10   | 2121 | 2196 | 4.47243719273 |               |
| NM_001007523 | F8A2      | 992  | 1064 | 9.81736281877 |               |
| NM_016222    | DDX41     | 462  | 509  | 6.16606523549 |               |
| NM_016222    | DDX41     | 1484 | 1525 | 6.16606523549 |               |
| NM_005931    | MICB      | 1661 | 1699 | 8.65054680207 |               |
| NM_005931    | MICB      | 609  | 666  | 8.65456440224 |               |
| NM_005931    | MICB      | 251  | 311  | 9.23952690296 |               |
| NM_005931    | MICB      | 782  | 881  | 9.23952690296 |               |
| NM_005931    | MICB      | 1195 | 1257 | 7.65456416632 |               |
| NM_005931    | MICB      | 470  | 516  | 8.65054680207 |               |
| NM_005931    | MICB      | 1401 | 1484 | 7.65456416632 |               |
| NM_001172665 | RAB40C    | 1599 | 1686 | 8.65348465795 |               |
| NM_001145045 | ZNF286B   | 2660 | 2719 | 10.3933838775 |               |
| NM_133447    | AGAP11    | 2847 | 2890 | 12.3309947307 |               |
| XM_373042    | LOC391722 |      | 405  | 476           | 10.6061301615 |
| XM_373042    | LOC391722 |      | 605  | 645           | 9.02099391041 |
| NM_004809    | STOML1    | 329  | 384  | 9.86517194787 |               |
| NM_004809    | STOML1    | 563  | 601  | 9.86115458361 |               |
| NM_003390    | WEE1      | 3098 | 3144 | 3.2602022504  |               |
| NM_003390    | WEE1      | 2357 | 2441 | 5.26421961465 |               |
| NM_003390    | WEE1      | 2058 | 2205 | 4.26421985057 |               |

|              |          |      |      |                   |
|--------------|----------|------|------|-------------------|
| NM_003390    | WEE1     | 1293 | 1412 | 6.07157477263     |
| NM_003390    | WEE1     | 1776 | 1883 | 5.58614794546     |
| NM_003390    | WEE1     | 2651 | 2711 | 3.26421961465     |
| NM_003390    | WEE1     | 841  | 1046 | 6.72365146921     |
| NM_003390    | WEE1     | 2920 | 2985 | 3.2602022504      |
| NM_003390    | WEE1     | 1164 | 1225 | 4.26421985057     |
| NM_001168280 | WWTR1    | 2749 | 2819 | 5.58971344914     |
| NM_001168280 | WWTR1    | 1298 | 1338 | 4.5937308134      |
| NM_001168280 | WWTR1    | 551  | 595  | 4.58971344914     |
| NM_001168280 | WWTR1    | 246  | 319  | 6.17868681898     |
| NM_001168280 | WWTR1    | 3031 | 3090 | 4.50959183993     |
| NM_001168280 | WWTR1    | 4903 | 4950 | 4.50959183993     |
| NM_001168280 | WWTR1    | 2259 | 2339 | 4.59373104931     |
| NM_012257    | HBP1     | 1286 | 1319 | 6.18685518994     |
| NM_012257    | HBP1     | 947  | 1026 | 6.85595689249     |
| NM_012256    | ZNF212   | 913  | 951  | 7.63878432922     |
| NM_001100412 | DR0SHA   | 3578 | 3632 | 6.7610385561      |
| NM_001100412 | DR0SHA   | 2815 | 2924 | 5.17624956978     |
| NM_001100412 | DR0SHA   | 292  | 345  | 6.17624307464     |
| NM_001100412 | DR0SHA   | 2023 | 2135 | 6.76121230642     |
| NM_001100412 | DR0SHA   | 1747 | 1796 | 5.17624307464     |
| NM_001100412 | DR0SHA   | 2536 | 2605 | 5.17624980569     |
| NM_001100412 | DR0SHA   | 4471 | 4554 | 6.17624956978     |
| NM_001100412 | DR0SHA   | 3290 | 3345 | 5.17223220552     |
| NM_001100412 | DR0SHA   | 3992 | 4101 | 7.76121230642     |
| NM_001100412 | DR0SHA   | 4218 | 4309 | 5.17624980547     |
| NM_001100412 | DR0SHA   | 3198 | 3278 | 5.17624307464     |
| NM_001100412 | DR0SHA   | 3349 | 3451 | 5.17624980569     |
| NM_014043    | CHMP2B   | 1695 | 1783 | 5.85492706651     |
| NM_014516    | CNOT3    | 1143 | 1196 | 5.44166827895     |
| NM_014516    | CNOT3    | 2274 | 2385 | 5.44568587912     |
| NM_014516    | CNOT3    | 2104 | 2163 | 5.36154666974     |
| NM_014516    | CNOT3    | 901  | 999  | 7.44568587912     |
| NM_014516    | CNOT3    | 2183 | 2254 | 6.4456858789      |
| NM_014516    | CNOT3    | 472  | 548  | 5.44567914807     |
| NM_014041    | SPCS1    | 874  | 933  | 3.52226836596     |
| NM_014041    | SPCS1    | 404  | 431  | 2.43812915658     |
| NM_014041    | SPCS1    | 332  | 388  | 3.52226836575     |
| NM_014041    | SPCS1    | 484  | 686  | 7.16612455574     |
| NM_014047    | C19orf53 |      | 158  | 244 3.18505245003 |
| NM_014044    | UNC50    | 577  | 631  | 5.07308644914     |
| NM_014044    | UNC50    | 678  | 718  | 5.65403134969     |
| NM_014044    | UNC50    | 824  | 904  | 6.65804894986     |
| NM_014044    | UNC50    | 264  | 317  | 5.07308644914     |
| NM_014044    | UNC50    | 765  | 800  | 5.07291269882     |
| NM_014044    | UNC50    | 413  | 485  | 7.07308644914     |
| NM_014044    | UNC50    | 107  | 180  | 5.07308644159     |
| NM_014044    | UNC50    | 722  | 764  | 4.06906884897     |
| NM_014044    | UNC50    | 489  | 560  | 6.65804894986     |
| NM_014044    | UNC50    | 980  | 1059 | 5.06906884897     |

|              |         |      |      |               |
|--------------|---------|------|------|---------------|
| NM_014045    | LRP10   | 1250 | 1345 | 8.68746488825 |
| NM_014045    | LRP10   | 2957 | 3036 | 7.22803326961 |
| NM_014045    | LRP10   | 1125 | 1193 | 6.81299577033 |
| NM_014045    | LRP10   | 1353 | 1408 | 7.22803326961 |
| NM_014045    | LRP10   | 142  | 212  | 6.22803326961 |
| NM_014045    | LRP10   | 2499 | 2532 | 6.81298903928 |
| NM_014045    | LRP10   | 950  | 1095 | 8.81299577033 |
| NM_014045    | LRP10   | 1416 | 1442 | 6.14389406023 |
| NM_014045    | LRP10   | 2567 | 2711 | 8.68746488825 |
| NM_014045    | LRP10   | 1205 | 1250 | 6.22802653856 |
| NM_014045    | LRP10   | 1970 | 2183 | 8.81299577033 |
| NM_014045    | LRP10   | 2787 | 2881 | 8.68746488825 |
| NM_014045    | LRP10   | 484  | 662  | 7.5499613645  |
| NM_014045    | LRP10   | 1461 | 1960 | 10.272427389  |
| NM_014045    | LRP10   | 2385 | 2495 | 5.22803326961 |
| NM_014045    | LRP10   | 742  | 871  | 8.03538819167 |
| NM_001487    | BLOC1S1 | 307  | 419  | 6.74955272382 |
| NM_001035254 | FAM102A | 790  | 851  | 7.66909919451 |
| NM_001035254 | FAM102A | 3095 | 3141 | 8.67311679468 |
| NM_001035254 | FAM102A | 545  | 573  | 6.5889775853  |
| NM_001035254 | FAM102A | 1102 | 1173 | 7.67311679468 |
| NM_003139    | SRPR    | 1536 | 1596 | 5.37439890396 |
| NM_003139    | SRPR    | 1410 | 1484 | 5.63743330979 |
| NM_003139    | SRPR    | 2054 | 2100 | 4.05247080907 |
| NM_003139    | SRPR    | 746  | 816  | 5.37439890396 |
| NM_003139    | SRPR    | 1343 | 1410 | 5.05247080907 |
| NM_003139    | SRPR    | 344  | 471  | 6.85982573113 |
| NM_003139    | SRPR    | 2002 | 2042 | 3.04845320889 |
| NM_003139    | SRPR    | 1492 | 1534 | 4.63341570962 |
| NM_003139    | SRPR    | 1697 | 1868 | 6.85982573113 |
| NM_003139    | SRPR    | 2116 | 2226 | 5.63743330979 |
| NM_003139    | SRPR    | 500  | 546  | 5.05247080907 |
| NM_003139    | SRPR    | 1892 | 1995 | 5.63743330979 |
| NM_003139    | SRPR    | 2564 | 2692 | 6.85982573113 |
| NM_003139    | SRPR    | 178  | 328  | 6.63743330979 |
| NM_003139    | SRPR    | 2704 | 2985 | 6.63743330979 |
| NM_003139    | SRPR    | 1633 | 1686 | 4.04845320889 |
| NM_003139    | SRPR    | 896  | 1320 | 8.37439890396 |
| NM_003139    | SRPR    | 559  | 676  | 3.05247080907 |
| NM_003139    | SRPR    | 2322 | 2548 | 6.05247080907 |
| NM_003132    | SRM     | 920  | 1009 | 7.28329442574 |
| NM_003132    | SRM     | 453  | 478  | 6.19915521635 |
| NM_003132    | SRM     | 265  | 312  | 7.19915521635 |
| NM_003132    | SRM     | 516  | 628  | 8.28329442574 |
| NM_006453    | TBL3    | 889  | 950  | 8.25749639104 |
| NM_006453    | TBL3    | 649  | 684  | 7.58840141199 |
| NM_006453    | TBL3    | 801  | 846  | 7.67236687106 |
| NM_006453    | TBL3    | 1884 | 1925 | 7.67254038546 |
| NM_006453    | TBL3    | 1171 | 1218 | 6.67236687106 |
| NM_006453    | TBL3    | 1274 | 1355 | 8.67254062137 |

|           |        |      |      |               |
|-----------|--------|------|------|---------------|
| NM_003646 | DGKZ   | 1787 | 1873 | 7.99923988714 |
| NM_003646 | DGKZ   | 2465 | 2524 | 6.99906613705 |
| NM_003646 | DGKZ   | 766  | 826  | 5.91510067798 |
| NM_003646 | DGKZ   | 2366 | 2435 | 5.99522228719 |
| NM_003646 | DGKZ   | 2284 | 2342 | 6.99923987982 |
| NM_003646 | DGKZ   | 1212 | 1250 | 5.99906613705 |
| NM_003646 | DGKZ   | 688  | 739  | 5.99906613705 |
| NM_003646 | DGKZ   | 545  | 590  | 6.99522228719 |
| NM_003131 | SRF    | 995  | 1039 | 6.28841948241 |
| NM_003640 | IKBKAP | 2873 | 2961 | 3.71251805947 |
| NM_003640 | IKBKAP | 4142 | 4228 | 4.12755555875 |
| NM_003640 | IKBKAP | 2073 | 2146 | 4.12755555875 |
| NM_003640 | IKBKAP | 5303 | 5362 | 4.93491048081 |
| NM_003640 | IKBKAP | 5214 | 5280 | 3.71251132842 |
| NM_003640 | IKBKAP | 819  | 887  | 3.12755532283 |
| NM_003640 | IKBKAP | 2695 | 2758 | 4.71251805947 |
| NM_003640 | IKBKAP | 4837 | 4906 | 3.71234430915 |
| NM_003640 | IKBKAP | 4233 | 4404 | 6.2150184     |
| NM_003640 | IKBKAP | 3050 | 3150 | 2.1275488277  |
| NM_003640 | IKBKAP | 4757 | 4792 | 3.71251132842 |
| NM_003640 | IKBKAP | 725  | 805  | 2.12755532283 |
| NM_003640 | IKBKAP | 2641 | 2694 | 2.12353795858 |
| NM_003640 | IKBKAP | 3284 | 3454 | 5.12755555875 |
| NM_003640 | IKBKAP | 5091 | 5201 | 3.12755555853 |
| NM_003640 | IKBKAP | 508  | 553  | 2.12353795858 |
| NM_003640 | IKBKAP | 581  | 668  | 3.12755555875 |
| NM_003640 | IKBKAP | 1136 | 1263 | 3.71251805947 |
| NM_003640 | IKBKAP | 3654 | 4095 | 7.33700892438 |
| NM_003640 | IKBKAP | 4590 | 4693 | 3.71251805947 |
| NM_003640 | IKBKAP | 4406 | 4582 | 6.29748056019 |
| NM_003640 | IKBKAP | 2279 | 2392 | 2.1275488277  |
| NM_003640 | IKBKAP | 1385 | 1669 | 6.12755555875 |
| NM_003640 | IKBKAP | 1310 | 1361 | 3.1275555512  |
| NM_003137 | SRPK1  | 1815 | 1872 | 4.90219243139 |
| NM_003137 | SRPK1  | 3744 | 3805 | 4.48715516803 |
| NM_003137 | SRPK1  | 3197 | 3244 | 3.81805345793 |
| NM_003137 | SRPK1  | 2520 | 2625 | 5.2241207622  |
| NM_003137 | SRPK1  | 1646 | 1722 | 4.48715516803 |
| NM_003137 | SRPK1  | 1222 | 1303 | 2.90201891699 |
| NM_003137 | SRPK1  | 1450 | 1527 | 4.90219266731 |
| NM_003137 | SRPK1  | 418  | 478  | 3.90219266731 |
| NM_003137 | SRPK1  | 2294 | 2365 | 2.9021926673  |
| NM_003137 | SRPK1  | 198  | 279  | 3.90219266731 |
| NM_003137 | SRPK1  | 4095 | 4263 | 5.70954758937 |
| NM_003137 | SRPK1  | 1762 | 1811 | 3.81805345793 |
| NM_003137 | SRPK1  | 2942 | 3042 | 4.90219266731 |
| NM_003137 | SRPK1  | 4032 | 4094 | 2.89817506714 |
| NM_003137 | SRPK1  | 2659 | 2827 | 4.90219266731 |
| NM_003137 | SRPK1  | 1903 | 2005 | 2.90218593626 |
| NM_003642 | HAT1   | 175  | 250  | 5.30326767315 |



|           |         |      |      |               |
|-----------|---------|------|------|---------------|
| NM_003642 | HAT1    | 1361 | 1424 | 5.30326767315 |
| NM_003642 | HAT1    | 1199 | 1278 | 4.88823016632 |
| NM_003642 | HAT1    | 302  | 436  | 6.88823017387 |
| NM_003642 | HAT1    | 485  | 605  | 6.11062259521 |
| NM_003642 | HAT1    | 1063 | 1166 | 6.11062259521 |
| NM_003642 | HAT1    | 784  | 903  | 5.62519576804 |
| NM_003642 | HAT1    | 1460 | 1567 | 4.30326767315 |
| NM_003642 | HAT1    | 1280 | 1360 | 5.88823017387 |
| NM_003642 | HAT1    | 51   | 165  | 5.88823017387 |
| NM_003642 | HAT1    | 920  | 1024 | 6.47319267459 |
| NM_003642 | HAT1    | 608  | 751  | 7.5511951866  |
| NM_006455 | LEPREL4 | 941  | 976  | 7.17911132367 |
| NM_006455 | LEPREL4 | 2001 | 2061 | 6.09898971446 |
| NM_006455 | LEPREL4 | 284  | 337  | 7.18312891629 |
| NM_006455 | LEPREL4 | 683  | 727  | 7.76809142456 |
| NM_006455 | LEPREL4 | 890  | 928  | 8.18312892362 |
| NM_006455 | LEPREL4 | 1192 | 1295 | 7.76809142456 |
| NM_006455 | LEPREL4 | 1891 | 1982 | 6.18312891629 |
| NM_006455 | LEPREL4 | 1035 | 1187 | 8.50505701873 |
| NM_006455 | LEPREL4 | 2122 | 2303 | 8.18312892384 |
| NM_006455 | LEPREL4 | 1325 | 1596 | 8.9904838459  |
| NM_014992 | DAAM1   | 4224 | 4281 | 8.1422125184  |
| NM_014992 | DAAM1   | 4517 | 4566 | 6.1422125184  |
| NM_014992 | DAAM1   | 1948 | 2005 | 7.7271750189  |
| NM_014992 | DAAM1   | 2135 | 2245 | 8.1422125184  |
| NM_014992 | DAAM1   | 3363 | 3421 | 8.46414061329 |
| NM_014992 | DAAM1   | 1261 | 1319 | 6.14221251818 |
| NM_014992 | DAAM1   | 806  | 846  | 7.05807330902 |
| NM_014992 | DAAM1   | 3537 | 3608 | 8.14221251818 |
| NM_014992 | DAAM1   | 5167 | 5256 | 8.14221251818 |
| NM_014992 | DAAM1   | 4820 | 4908 | 6.14220578735 |
| NM_014992 | DAAM1   | 570  | 643  | 7.13819491823 |
| NM_014992 | DAAM1   | 1    | 59   | 7.7270012688  |
| NM_014992 | DAAM1   | 911  | 967  | 7.72716828807 |
| NM_014992 | DAAM1   | 2050 | 2123 | 8.14221228248 |
| NM_014992 | DAAM1   | 1386 | 1481 | 6.14221251839 |
| NM_014992 | DAAM1   | 4589 | 4700 | 7.72717501912 |
| NM_014992 | DAAM1   | 77   | 177  | 7.72717501912 |
| NM_014992 | DAAM1   | 3294 | 3350 | 6.14221251085 |
| NM_014992 | DAAM1   | 3811 | 3884 | 7.14221251839 |
| NM_014992 | DAAM1   | 2913 | 2963 | 6.05807330902 |
| NM_014992 | DAAM1   | 2249 | 2318 | 7.14220578735 |
| NM_014992 | DAAM1   | 5535 | 5605 | 6.14203876808 |
| NM_014992 | DAAM1   | 1011 | 1094 | 7.13819491823 |
| NM_014992 | DAAM1   | 3889 | 3997 | 7.72717501912 |
| NM_014992 | DAAM1   | 2681 | 2767 | 8.1422125184  |
| NM_014992 | DAAM1   | 368  | 474  | 6.14221251839 |
| NM_014992 | DAAM1   | 3446 | 3527 | 8.72717501912 |
| NM_005392 | PHF2    | 4420 | 4491 | 8.46839593927 |
| NM_005392 | PHF2    | 2171 | 2219 | 7.88360695295 |

|              |          |      |      |                    |
|--------------|----------|------|------|--------------------|
| NM_005392    | PHF2     | 1345 | 1414 | 7.88360695295      |
| NM_005392    | PHF2     | 5092 | 5166 | 8.46856968937      |
| NM_152769    | C19orf26 |      | 406  | 479 12.5070358796  |
| NM_032271    | TRAF7    | 2393 | 2452 | 7.50896267986      |
| NM_032271    | TRAF7    | 1529 | 1625 | 6.50878892954      |
| NM_032271    | TRAF7    | 1447 | 1513 | 7.09392494466      |
| NM_032271    | TRAF7    | 339  | 420  | 5.50896267986      |
| NM_032271    | TRAF7    | 40   | 108  | 5.50895594881      |
| NM_032271    | TRAF7    | 1712 | 1798 | 6.50896267231      |
| NM_032271    | TRAF7    | 1186 | 1249 | 5.50896267231      |
| NM_032271    | TRAF7    | 2568 | 2610 | 5.50494507969      |
| NM_032271    | TRAF7    | 2063 | 2152 | 7.50896267231      |
| NM_032271    | TRAF7    | 895  | 1023 | 6.50896267986      |
| NM_005399    | PRKAB2   | 760  | 810  | 9.04863197555      |
| NM_005399    | PRKAB2   | 2862 | 2908 | 7.04462110643      |
| NM_005399    | PRKAB2   | 353  | 415  | 9.04846495629      |
| NM_005399    | PRKAB2   | 4757 | 4814 | 8.62958360715      |
| NM_005399    | PRKAB2   | 4374 | 4423 | 7.96449949722      |
| NM_005399    | PRKAB2   | 4317 | 4373 | 7.04863847069      |
| NM_005399    | PRKAB2   | 5171 | 5250 | 8.0486387066       |
| NM_005399    | PRKAB2   | 4975 | 5033 | 8.63360120733      |
| NM_005399    | PRKAB2   | 3575 | 3755 | 8.63360120733      |
| NM_005399    | PRKAB2   | 4148 | 4283 | 8.63360120733      |
| NM_005399    | PRKAB2   | 3111 | 3165 | 7.04462110643      |
| NM_032273    | TMEM126A |      | 447  | 513 9.35520176583  |
| NM_032273    | TMEM126A |      | 271  | 321 9.77425013423  |
| NM_032272    | MAF1     | 998  | 1060 | 5.05632156666      |
| NM_032272    | MAF1     | 1723 | 1769 | 5.64127733633      |
| NM_032272    | MAF1     | 893  | 994  | 5.64128406738      |
| NM_032272    | MAF1     | 479  | 597  | 6.37824966155      |
| NM_032875    | FBXL20   | 7717 | 7773 | 7.50175691426      |
| NM_002039    | GAB1     | 4099 | 4148 | 9.1671333632       |
| NM_145254    | TMEM170A |      | 313  | 394 12.1840814556  |
| NM_145254    | TMEM170A |      | 222  | 312 10.8621533607  |
| NM_145254    | TMEM170A |      | 462  | 531 10.8619796103  |
| NM_032385    | C5orf4   | 248  | 305  | 8.58268409715      |
| NM_145701    | CDCA4    | 578  | 629  | 7.3890170868       |
| NM_006663    | PPP1R13L |      | 103  | 189 10.6577466848  |
| NM_006663    | PPP1R13L |      | 814  | 849 9.335818354    |
| NM_006663    | PPP1R13L |      | 2492 | 2548 8.33180098974 |
| NM_001098426 | SMARCD2  | 1508 | 1587 | 6.70651983512      |
| NM_001098426 | SMARCD2  | 2162 | 2225 | 7.02844793         |
| NM_001098426 | SMARCD2  | 216  | 275  | 6.29148210014      |
| NM_001098426 | SMARCD2  | 1077 | 1139 | 4.70250223516      |
| NM_001098426 | SMARCD2  | 990  | 1039 | 5.62238062595      |
| NM_001098426 | SMARCD2  | 1396 | 1450 | 6.70651983534      |
| NM_001098426 | SMARCD2  | 1809 | 1914 | 4.70651982779      |
| NM_001098426 | SMARCD2  | 1682 | 1805 | 6.29148232851      |
| NM_152586    | USP54    | 3242 | 3296 | 7.45548672313      |
| NM_152586    | USP54    | 871  | 916  | 7.53560833234      |

|              |         |      |      |                 |
|--------------|---------|------|------|-----------------|
| NM_152586    | USP54   | 3627 | 3662 | 7.5394521822    |
| NM_152586    | USP54   | 5272 | 5309 | 7.53560833234   |
| NM_152586    | USP54   | 5312 | 5374 | 7.5396256966    |
| NM_032098    | PCDHGB4 | 283  | 394  | 11.9030586566   |
| NM_032098    | PCDHGB4 | 759  | 830  | 9.49699135228   |
| NM_032098    | PCDHGB4 | 405  | 446  | 9.5771129615    |
| NM_032098    | PCDHGB4 | 2263 | 2370 | 11.1660930624   |
| NM_032098    | PCDHGB4 | 2066 | 2120 | 11.1660930548   |
| NM_032098    | PCDHGB4 | 1993 | 2056 | 9.58113056167   |
| NM_032098    | PCDHGB4 | 571  | 663  | 11.1660930548   |
| NM_032098    | PCDHGB4 | 7    | 109  | 11.1660930624   |
| NM_015395    | TECPR1  | 1197 | 1242 | 10.729539524    |
| NM_015395    | TECPR1  | 166  | 224  | 10.1405661542   |
| NM_015395    | TECPR1  | 1258 | 1384 | 11.4665118492   |
| NM_015395    | TECPR1  | 4500 | 4559 | 9.14441000404   |
| NM_015395    | TECPR1  | 3946 | 4007 | 10.1445835184   |
| NM_015395    | TECPR1  | 5443 | 5520 | 11.4665118492   |
| NM_015397    | DCAF12  | 1160 | 1199 | 5.32216053665   |
| NM_015397    | DCAF12  | 1587 | 1635 | 6.91096688722   |
| NM_015397    | DCAF12  | 834  | 885  | 6.91096688722   |
| NM_015397    | DCAF12  | 3424 | 3497 | 6.91114063754   |
| NM_015397    | DCAF12  | 3016 | 3069 | 5.32216053665   |
| NM_015397    | DCAF12  | 779  | 831  | 5.24203892744   |
| NM_015397    | DCAF12  | 3102 | 3149 | 6.32216053665   |
| NM_015397    | DCAF12  | 886  | 995  | 8.32617813682   |
| NM_015640    | SERBP1  | 873  | 921  | -0.113838349133 |
| NM_015640    | SERBP1  | 192  | 258  | 2.20808998167   |
| NM_015640    | SERBP1  | 1749 | 1832 | 2.88616188679   |
| NM_015640    | SERBP1  | 439  | 565  | 2.47112438751   |
| NM_015640    | SERBP1  | 3961 | 4010 | 0.885988136467  |
| NM_015640    | SERBP1  | 645  | 872  | 3.69351680884   |
| NM_015640    | SERBP1  | 1612 | 1638 | 1.38698517812   |
| NM_015640    | SERBP1  | 929  | 1055 | 2.20808998167   |
| NM_015640    | SERBP1  | 1657 | 1740 | -0.113838113215 |
| NM_015640    | SERBP1  | 3321 | 3429 | 3.05608688823   |
| NM_015640    | SERBP1  | 1063 | 1469 | 4.40972384284   |
| NM_015649    | IRF2BP1 | 400  | 462  | 7.38518206412   |
| NM_015649    | IRF2BP1 | 1230 | 1345 | 8.38517533329   |
| NM_015649    | IRF2BP1 | 1129 | 1193 | 8.38500831402   |
| NM_015649    | IRF2BP1 | 2066 | 2154 | 7.38518205679   |
| NM_015649    | IRF2BP1 | 267  | 347  | 7.38518206434   |
| NM_001040716 | PC      | 2792 | 2904 | 7.88475255275   |
| NM_001040716 | PC      | 1908 | 1997 | 8.62171814691   |
| NM_001040716 | PC      | 270  | 303  | 6.29577245186   |
| NM_001040716 | PC      | 3696 | 3787 | 7.29979005203   |
| NM_001040716 | PC      | 465  | 507  | 6.29978981611   |
| NM_001040716 | PC      | 3342 | 3406 | 8.29978981611   |
| NM_001040716 | PC      | 1014 | 1092 | 7.88475255275   |
| NM_001040716 | PC      | 2247 | 2334 | 6.29978981611   |
| NM_001040716 | PC      | 1299 | 1358 | 6.29978332098   |

|              |         |      |      |                |
|--------------|---------|------|------|----------------|
| NM_001040716 | PC      | 1141 | 1175 | 6.29961630171  |
| NM_001040716 | PC      | 597  | 664  | 6.29979005181  |
| NM_002518    | NPAS2   | 1362 | 1402 | 6.65897966448  |
| NM_002518    | NPAS2   | 1152 | 1212 | 6.57484718615  |
| NM_002518    | NPAS2   | 266  | 330  | 6.65898639553  |
| NM_002518    | NPAS2   | 564  | 607  | 6.65496879536  |
| NM_002518    | NPAS2   | 623  | 684  | 6.65898615962  |
| NM_002518    | NPAS2   | 459  | 510  | 7.65496879536  |
| NM_002518    | NPAS2   | 3128 | 3297 | 8.24394889626  |
| NM_002518    | NPAS2   | 2932 | 3017 | 8.24394889626  |
| NM_002518    | NPAS2   | 1248 | 1323 | 8.65898639553  |
| NM_002513    | NME3    | 546  | 596  | 9.28476904469  |
| NM_002513    | NME3    | 767  | 849  | 8.28476905224  |
| NM_002513    | NME3    | 373  | 403  | 7.20062984286  |
| NM_002513    | NME3    | 598  | 664  | 8.86571395279  |
| NM_000574    | CD55    | 1020 | 1085 | 7.80229566152  |
| NM_000574    | CD55    | 643  | 684  | 8.2173398843   |
| NM_000574    | CD55    | 881  | 931  | 6.13320068247  |
| NM_018019    | MED9    | 1595 | 1641 | 7.21286013164  |
| NM_177441    | TMUB2   | 303  | 384  | 9.46294449134  |
| NM_177441    | TMUB2   | 837  | 931  | 9.04790699228  |
| NM_177441    | TMUB2   | 1531 | 1577 | 7.45892689138  |
| NM_177441    | TMUB2   | 1410 | 1462 | 9.04790675636  |
| NM_177441    | TMUB2   | 1262 | 1325 | 7.46294449156  |
| NM_177441    | TMUB2   | 710  | 817  | 8.46294448401  |
| NM_015023    | WDC1    | 439  | 479  | 9.45935767522  |
| NM_015023    | WDC1    | 2683 | 2774 | 10.4633752754  |
| NM_015023    | WDC1    | 3413 | 3523 | 8.87841276712  |
| NM_002966    | S100A10 | 871  | 947  | 0.624702725979 |
| NM_002966    | S100A10 | 554  | 816  | 3.79462773497  |
| NM_015021    | ZNF292  | 597  | 652  | 7.44480378011  |
| NM_015021    | ZNF292  | 7902 | 7983 | 6.52492538933  |
| NM_015021    | ZNF292  | 8796 | 8843 | 7.52492538933  |
| NM_015021    | ZNF292  | 310  | 404  | 7.5289429895   |
| NM_015021    | ZNF292  | 5300 | 5355 | 7.52492538933  |
| NM_015021    | ZNF292  | 7313 | 7401 | 6.52492538933  |
| NM_015021    | ZNF292  | 2083 | 2134 | 7.44480378011  |
| NM_015021    | ZNF292  | 8261 | 8333 | 9.11390549022  |
| NM_015021    | ZNF292  | 1169 | 1227 | 7.52876923918  |
| NM_015021    | ZNF292  | 2484 | 2565 | 8.10988789005  |
| NM_015021    | ZNF292  | 9204 | 9247 | 6.44480378011  |
| NM_015021    | ZNF292  | 6474 | 6582 | 6.52894298195  |
| NM_015021    | ZNF292  | 4679 | 4747 | 6.44480378011  |
| NM_015027    | PDXDC1  | 3299 | 3370 | 3.94442820519  |
| NM_015027    | PDXDC1  | 633  | 704  | 2.94442820519  |
| NM_015027    | PDXDC1  | 2654 | 2747 | 3.94442820519  |
| NM_015027    | PDXDC1  | 2596 | 2634 | 3.52938397485  |
| NM_015027    | PDXDC1  | 517  | 591  | 3.52939070591  |
| NM_015027    | PDXDC1  | 1407 | 1465 | 3.52939046999  |
| NM_015027    | PDXDC1  | 2772 | 2842 | 3.94442820519  |

|              |           |      |      |                    |
|--------------|-----------|------|------|--------------------|
| NM_015027    | PDXDC1    | 3139 | 3219 | 3.94442820496      |
| NM_015027    | PDXDC1    | 1479 | 1535 | 1.8602889958       |
| NM_015027    | PDXDC1    | 1621 | 1722 | 4.52939070591      |
| NM_015027    | PDXDC1    | 3048 | 3108 | 1.94442147413      |
| NM_015027    | PDXDC1    | 1780 | 1959 | 4.52939070591      |
| NM_015027    | PDXDC1    | 760  | 1087 | 5.75178312724      |
| NM_015027    | PDXDC1    | 2163 | 2261 | 2.94442820519      |
| NM_015027    | PDXDC1    | 281  | 367  | 1.94442820519      |
| NM_015027    | PDXDC1    | 1109 | 1231 | 4.75178312724      |
| NM_015027    | PDXDC1    | 1233 | 1384 | 4.94442820519      |
| NM_015026    | MON2      | 4418 | 4466 | 7.75214515555      |
| NM_015026    | MON2      | 4042 | 4131 | 9.75231890587      |
| NM_015026    | MON2      | 2932 | 2983 | 8.75214515555      |
| NM_015026    | MON2      | 1544 | 1581 | 7.7483013057       |
| NM_015026    | MON2      | 2810 | 2885 | 9.33326380642      |
| NM_015026    | MON2      | 1360 | 1423 | 8.75231217482      |
| NM_015026    | MON2      | 1317 | 1353 | 7.7483013057       |
| NM_015026    | MON2      | 2751 | 2802 | 8.66817969649      |
| NM_015026    | MON2      | 978  | 1037 | 7.75231217482      |
| NM_015026    | MON2      | 919  | 974  | 8.7483013057       |
| NM_015026    | MON2      | 5418 | 5500 | 8.75231889832      |
| NM_015026    | MON2      | 2240 | 2322 | 8.75231217482      |
| NM_015026    | MON2      | 1722 | 1814 | 9.33728140637      |
| NM_015026    | MON2      | 1084 | 1141 | 8.7483013057       |
| NM_015026    | MON2      | 4576 | 4704 | 10.0742470008      |
| NM_015026    | MON2      | 3835 | 3901 | 9.75231890565      |
| NM_018017    | C10orf118 |      | 3484 | 3547 5.79502749299 |
| NM_002967    | SAFB      | 277  | 361  | 2.80956849599      |
| NM_002967    | SAFB      | 2091 | 2123 | 2.72542928661      |
| NM_002967    | SAFB      | 1363 | 1451 | 4.39453099671      |
| NM_002967    | SAFB      | 2950 | 2995 | 2.72542928661      |
| NM_002967    | SAFB      | 739  | 787  | 2.72542928661      |
| NM_002967    | SAFB      | 591  | 677  | 5.13149659088      |
| NM_002967    | SAFB      | 2464 | 2532 | 2.80956826007      |
| NM_002967    | SAFB      | 1594 | 1696 | 3.80956848844      |
| NM_002967    | SAFB      | 3017 | 3078 | 2.80555089582      |
| NM_002967    | SAFB      | 2338 | 2450 | 3.80956849599      |
| NM_002967    | SAFB      | 1713 | 1811 | 4.80956849599      |
| NM_002967    | SAFB      | 888  | 965  | 3.80956176494      |
| NM_001130046 | CCL20     | 720  | 771  | 6.53215471429      |
| NM_001130046 | CCL20     | 3    | 720  | 11.6111060557      |
| NM_001024808 | BCL7A     | 726  | 777  | 9.73528116629      |
| NM_001024808 | BCL7A     | 2294 | 2355 | 8.8154027755       |
| NM_001024808 | BCL7A     | 860  | 950  | 8.81924662536      |
| NM_001024808 | BCL7A     | 2593 | 2641 | 8.73528116629      |
| NM_001024808 | BCL7A     | 1612 | 1676 | 8.81942037567      |
| NM_004077    | CS        | 1825 | 1871 | 4.30388571906      |
| NM_004077    | CS        | 2453 | 2526 | 4.30388572661      |
| NM_004077    | CS        | 2417 | 2452 | 4.88884799141      |
| NM_004077    | CS        | 2534 | 2617 | 5.30388572661      |

|              |         |      |      |               |
|--------------|---------|------|------|---------------|
| NM_004077    | CS      | 2246 | 2407 | 5.6258138215  |
| NM_004077    | CS      | 2625 | 2731 | 5.6258138215  |
| NM_004077    | CS      | 691  | 990  | 8.11124064867 |
| NM_004077    | CS      | 520  | 684  | 6.6258138215  |
| NM_004077    | CS      | 331  | 504  | 7.55181324006 |
| NM_004077    | CS      | 1021 | 1496 | 8.47381072805 |
| NM_004077    | CS      | 2153 | 2242 | 6.11124064867 |
| NM_004077    | CS      | 73   | 166  | 3.30388572661 |
| NM_004077    | CS      | 1541 | 1722 | 7.11124064867 |
| NM_004077    | CS      | 171  | 321  | 6.6258138215  |
| NM_004077    | CS      | 2732 | 2944 | 6.6258138215  |
| NM_004077    | CS      | 1909 | 2066 | 5.88884822733 |
| NM_004074    | COX8A   | 283  | 340  | 9.69248404289 |
| NM_004074    | COX8A   | 11   | 69   | 10.2774465436 |
| NM_004074    | COX8A   | 344  | 462  | 10.2774465436 |
| NM_004074    | COX8A   | 149  | 279  | 11.1075215422 |
| NM_004074    | COX8A   | 70   | 108  | 7.10752154216 |
| NM_004075    | CRY1    | 3036 | 3073 | 6.35438228552 |
| NM_004075    | CRY1    | 1592 | 1706 | 6.35438228552 |
| NM_004075    | CRY1    | 1179 | 1258 | 7.9433623864  |
| NM_001009993 | FAM168B | 3403 | 3461 | 7.25342470198 |
| NM_001009993 | FAM168B | 4279 | 4331 | 8.83838047164 |
| NM_001009993 | FAM168B | 3173 | 3215 | 7.25342469443 |
| NM_001009993 | FAM168B | 3225 | 3358 | 9.25342470198 |
| NM_001009993 | FAM168B | 702  | 760  | 9.25342469443 |
| NM_001009993 | FAM168B | 3083 | 3149 | 7.25341797092 |
| NM_001009993 | FAM168B | 220  | 268  | 8.25325095166 |
| NM_001009993 | FAM168B | 2295 | 2337 | 8.16928549259 |
| NM_001009993 | FAM168B | 1781 | 1839 | 7.25342446606 |
| NM_001009993 | FAM168B | 3462 | 3518 | 7.25342470197 |
| NM_001009993 | FAM168B | 3002 | 3069 | 7.2494071018  |
| NM_001009993 | FAM168B | 2809 | 2853 | 8.83436960252 |
| NM_001009993 | FAM168B | 4345 | 4410 | 8.8383872027  |
| NM_001009993 | FAM168B | 2428 | 2479 | 7.2494071018  |
| NM_001009993 | FAM168B | 4543 | 4599 | 9.25342470198 |
| NM_001009993 | FAM168B | 812  | 943  | 10.4233497034 |
| NM_001009993 | FAM168B | 3856 | 3937 | 9.25342470198 |
| NM_001009993 | FAM168B | 1948 | 2054 | 8.25342470198 |
| NM_001009993 | FAM168B | 3659 | 3784 | 10.253424702  |
| NM_001009993 | FAM168B | 2867 | 2927 | 7.25342469443 |
| NM_001009993 | FAM168B | 4616 | 4701 | 8.25342470198 |
| NM_001009993 | FAM168B | 4023 | 4168 | 9.25342470198 |
| NM_001009993 | FAM168B | 972  | 1104 | 10.253424702  |
| NM_001009993 | FAM168B | 4871 | 4955 | 7.25342470198 |
| NM_001009993 | FAM168B | 2518 | 2613 | 7.25342469443 |
| NM_001242819 | DEF8    | 3223 | 3264 | 6.52434402853 |
| NM_001242819 | DEF8    | 351  | 399  | 6.52050017868 |
| NM_001242819 | DEF8    | 2275 | 2333 | 5.5245177713  |
| NM_001242819 | DEF8    | 405  | 486  | 6.5245177713  |
| NM_001242819 | DEF8    | 276  | 337  | 6.52451754293 |

|              |          |      |      |                   |
|--------------|----------|------|------|-------------------|
| NM_001009998 | SSBP4    | 1580 | 1615 | 8.64846668652     |
| NM_001009998 | SSBP4    | 365  | 465  | 11.0545339908     |
| NM_001009999 | KDM1A    | 1126 | 1167 | 3.72741274241     |
| NM_001009999 | KDM1A    | 1842 | 1916 | 5.72758649273     |
| NM_001009999 | KDM1A    | 2210 | 2252 | 4.72758625681     |
| NM_001009999 | KDM1A    | 2061 | 2112 | 5.72758649273     |
| NM_001009999 | KDM1A    | 1344 | 1394 | 5.30853139327     |
| NM_001009999 | KDM1A    | 2259 | 2315 | 4.72757976167     |
| NM_001009999 | KDM1A    | 2369 | 2497 | 6.04951458761     |
| NM_001009999 | KDM1A    | 1917 | 1992 | 5.30853139327     |
| NM_001009999 | KDM1A    | 630  | 678  | 3.64344728334     |
| NM_001009999 | KDM1A    | 746  | 827  | 5.31254875753     |
| NM_001009999 | KDM1A    | 1533 | 1627 | 5.31254226239     |
| NM_001550    | IFRD1    | 873  | 920  | 7.16228706702     |
| NM_001550    | IFRD1    | 2194 | 2275 | 6.35493214496     |
| NM_001550    | IFRD1    | 982  | 1033 | 5.93989463813     |
| NM_001550    | IFRD1    | 2005 | 2086 | 4.35493214474     |
| NM_001550    | IFRD1    | 596  | 631  | 5.27079293558     |
| NM_001550    | IFRD1    | 1519 | 1570 | 5.35493214496     |
| NM_001550    | IFRD1    | 723  | 788  | 4.35493213741     |
| NM_001550    | IFRD1    | 1575 | 1643 | 6.93989464568     |
| NM_001550    | IFRD1    | 1090 | 1149 | 6.35493214496     |
| NM_001550    | IFRD1    | 1166 | 1241 | 6.93989464568     |
| NM_001550    | IFRD1    | 1906 | 1968 | 5.27079293558     |
| NM_001550    | IFRD1    | 1747 | 1808 | 5.35493214496     |
| NM_001550    | IFRD1    | 1271 | 1354 | 6.35493214496     |
| NM_001550    | IFRD1    | 1383 | 1508 | 6.93989464568     |
| NM_001550    | IFRD1    | 57   | 174  | 6.35493214496     |
| NM_006401    | ANP32B   | 1071 | 1172 | 2.62476134988     |
| NM_006401    | ANP32B   | 1241 | 1295 | 3.03962509885     |
| NM_006401    | ANP32B   | 881  | 917  | 1.03962509885     |
| NM_006401    | ANP32B   | 540  | 755  | 5.4992304678      |
| NM_006401    | ANP32B   | 1173 | 1213 | 1.03979211811     |
| NM_006401    | ANP32B   | 1326 | 1430 | 3.62476134988     |
| NM_006401    | ANP32B   | 781  | 880  | 1.03979884916     |
| NM_006401    | ANP32B   | 347  | 527  | 4.4992304678      |
| NM_001551    | IGBP1    | 495  | 534  | 4.17545702447     |
| NM_001551    | IGBP1    | 368  | 447  | 2.67445998281     |
| NM_001551    | IGBP1    | 889  | 953  | 4.67445998281     |
| NM_003692    | TMEFF1   | 1032 | 1072 | 8.36645493215     |
| NM_000973    | RPL8     | 765  | 864  | 3.55435255444     |
| NM_000973    | RPL8     | 461  | 533  | 2.23242445955     |
| NM_000973    | RPL8     | 36   | 129  | 2.81738696027     |
| NM_000973    | RPL8     | 717  | 761  | 0.232250709233    |
| NM_000973    | RPL8     | 150  | 233  | 1.81738696027     |
| NM_000973    | RPL8     | 537  | 714  | 4.3198873008      |
| NM_000973    | RPL8     | 261  | 461  | 4.3198873008      |
| NM_030821    | PLA2G12A |      | 610  | 661 5.7253074143  |
| NM_030821    | PLA2G12A |      | 844  | 889 5.64518580509 |
| NM_138571    | HINT3    | 517  | 641  | 6.16888686024     |

|           |          |      |      |      |               |
|-----------|----------|------|------|------|---------------|
| NM_138570 | SLC38A10 |      | 836  | 871  | 6.0855387443  |
| NM_138570 | SLC38A10 |      | 1007 | 1050 | 6.08955634447 |
| NM_138570 | SLC38A10 |      | 1771 | 1824 | 7.67451211414 |
| NM_138570 | SLC38A10 |      | 780  | 836  | 9.54898796311 |
| NM_138570 | SLC38A10 |      | 1854 | 1925 | 6.0855387443  |
| NM_138570 | SLC38A10 |      | 1230 | 1288 | 9.08955634447 |
| NM_138570 | SLC38A10 |      | 314  | 371  | 6.08955634447 |
| NM_138570 | SLC38A10 |      | 1599 | 1653 | 7.08955634425 |
| NM_138570 | SLC38A10 |      | 1056 | 1125 | 7.08955634447 |
| NM_138570 | SLC38A10 |      | 680  | 770  | 9.08955634447 |
| NM_138570 | SLC38A10 |      | 2251 | 2287 | 6.08938259415 |
| NM_138570 | SLC38A10 |      | 2673 | 2751 | 7.0855387443  |
| NM_138570 | SLC38A10 |      | 873  | 970  | 9.41148443936 |
| NM_138570 | SLC38A10 |      | 537  | 634  | 8.89691126653 |
| NM_138570 | SLC38A10 |      | 1469 | 1579 | 8.41148443936 |
| NM_033326 | S0X6     | 755  | 820  |      | 10.6445262377 |
| NM_138578 | BCL2L1   | 2365 | 2421 |      | 2.68659402252 |
| NM_138578 | BCL2L1   | 1887 | 1935 |      | 2.10163151425 |
| NM_138578 | BCL2L1   | 543  | 617  |      | 2.1016315218  |
| NM_138578 | BCL2L1   | 1968 | 2009 |      | 1.10162479075 |
| NM_138578 | BCL2L1   | 8    | 116  |      | 3.68659402252 |
| NM_138578 | BCL2L1   | 421  | 518  |      | 4.27155652325 |
| NM_138578 | BCL2L1   | 2136 | 2365 |      | 5.85651902397 |
| NM_138578 | BCL2L1   | 1815 | 1858 |      | 2.10163128588 |
| NM_138578 | BCL2L1   | 130  | 377  |      | 6.23091453875 |
| NM_138578 | BCL2L1   | 1402 | 1562 |      | 5.62519347786 |
| NM_138578 | BCL2L1   | 1567 | 1690 |      | 4.90898644386 |
| NM_138578 | BCL2L1   | 2482 | 2568 |      | 3.90898644386 |
| NM_138578 | BCL2L1   | 2050 | 2108 |      | 1.1016315218  |
| NM_138578 | BCL2L1   | 1239 | 1301 |      | 3.42355961669 |
| NM_138578 | BCL2L1   | 1306 | 1389 |      | 3.42355961669 |
| NM_138578 | BCL2L1   | 644  | 978  |      | 6.18909436305 |
| NM_138578 | BCL2L1   | 987  | 1176 |      | 4.68659402252 |
| NM_000204 | CFI      | 563  | 643  |      | 4.22325748585 |
| NM_000204 | CFI      | 174  | 262  |      | 4.73783065868 |
| NM_000204 | CFI      | 268  | 323  |      | 1.41590255624 |
| NM_000204 | CFI      | 455  | 538  |      | 1.41590256379 |
| NM_000204 | CFI      | 872  | 991  |      | 5.3227931594  |
| NM_000204 | CFI      | 1673 | 2002 |      | 5.87533418243 |
| NM_000204 | CFI      | 1239 | 1645 |      | 7.24879257796 |
| NM_000204 | CFI      | 1029 | 1236 |      | 5.93946451985 |
| NM_000204 | CFI      | 656  | 857  |      | 5.58582756523 |
| NM_001092 | ABR      | 1661 | 1730 |      | 8.95469130809 |
| NM_001092 | ABR      | 1205 | 1275 |      | 7.36972880715 |
| NM_001092 | ABR      | 145  | 216  |      | 8.3657112072  |
| NM_001092 | ABR      | 75   | 118  |      | 7.36972207632 |
| NM_001092 | ABR      | 3777 | 3826 |      | 7.3657112072  |
| NM_001092 | ABR      | 894  | 935  |      | 8.36972207632 |
| NM_001092 | ABR      | 3034 | 3085 |      | 8.36972857145 |
| NM_001092 | ABR      | 2394 | 2505 |      | 8.36972880737 |



|              |          |      |      |               |               |
|--------------|----------|------|------|---------------|---------------|
| NM_001092    | ABR      | 4887 | 4999 | 9.95469130809 |               |
| NM_001092    | ABR      | 1019 | 1118 | 7.36972880737 |               |
| NM_001092    | ABR      | 2002 | 2066 | 9.36972207632 |               |
| NM_001092    | ABR      | 660  | 703  | 7.3657112072  |               |
| NM_001092    | ABR      | 1467 | 1530 | 8.36972879982 |               |
| NM_001092    | ABR      | 1742 | 1792 | 8.36955505706 |               |
| NM_001092    | ABR      | 4713 | 4788 | 7.28558959799 |               |
| NM_001092    | ABR      | 2712 | 2808 | 9.69165690226 |               |
| NM_001092    | ABR      | 2557 | 2616 | 7.3657112072  |               |
| NM_001092    | ABR      | 3250 | 3392 | 10.5396538088 |               |
| NM_001092    | ABR      | 546  | 625  | 7.36972879982 |               |
| NM_001092    | ABR      | 4105 | 4194 | 7.36972879982 |               |
| NM_021968    | HIST1H4J |      | 150  | 226           | 11.3813728984 |
| NM_021968    | HIST1H4J |      | 280  | 322           | 10.3813728981 |
| NM_001098    | AC02     | 491  | 535  | 5.94138173432 |               |
| NM_001098    | AC02     | 1554 | 1606 | 4.36043683377 |               |
| NM_001098    | AC02     | 547  | 617  | 6.36043683377 |               |
| NM_001098    | AC02     | 1125 | 1182 | 4.36043683355 |               |
| NM_001098    | AC02     | 19   | 92   | 6.36043683377 |               |
| NM_001098    | AC02     | 151  | 261  | 5.36043683377 |               |
| NM_001098    | AC02     | 387  | 483  | 5.36026308346 |               |
| NM_001098    | AC02     | 1718 | 1779 | 5.3564192336  |               |
| NM_001098    | AC02     | 1984 | 2124 | 5.9453993345  |               |
| NM_001098    | AC02     | 905  | 1021 | 6.36043683377 |               |
| NM_001098    | AC02     | 645  | 749  | 6.68236492866 |               |
| NM_006408    | AGR2     | 722  | 769  | 8.55328117897 |               |
| NM_006408    | AGR2     | 322  | 403  | 9.87922687403 |               |
| NM_006408    | AGR2     | 674  | 718  | 8.55729877159 |               |
| NM_006408    | AGR2     | 552  | 673  | 11.5572987791 |               |
| NM_006408    | AGR2     | 772  | 819  | 8.55729877159 |               |
| NM_006408    | AGR2     | 195  | 311  | 9.55729877914 |               |
| NM_000979    | RPL18    | 606  | 718  | 6.33836977544 |               |
| NM_000979    | RPL18    | 725  | 761  | 3.7534070388  |               |
| NM_000979    | RPL18    | 824  | 882  | 5.07533536961 |               |
| NM_000979    | RPL18    | 221  | 605  | 8.11095927934 |               |
| NM_000019    | ACAT1    | 594  | 640  | 3.44846684307 |               |
| NM_000019    | ACAT1    | 960  | 1050 | 4.53243230214 |               |
| NM_001128423 | MPV17L   | 1972 | 2017 | 8.39426507669 |               |
| NM_001128423 | MPV17L   | 2197 | 2273 | 6.80930257597 |               |
| NM_001128423 | MPV17L   | 873  | 942  | 7.81331344509 |               |
| NM_001128423 | MPV17L   | 741  | 798  | 8.31414346748 |               |
| NM_001128423 | MPV17L   | 466  | 561  | 8.81332017614 |               |
| NM_001128423 | MPV17L   | 1435 | 1525 | 6.80930257597 |               |
| NM_017898    | MOSC2    | 888  | 933  | 7.48746999534 |               |
| NM_017898    | MOSC2    | 729  | 768  | 7.49131384519 |               |
| NM_017898    | MOSC2    | 451  | 496  | 7.48746999534 |               |
| NM_017899    | TESC     | 932  | 996  | 6.55377475639 |               |
| NM_017899    | TESC     | 285  | 339  | 4.2318466615  |               |
| NM_017899    | TESC     | 662  | 786  | 5.81680916222 |               |
| NM_017899    | TESC     | 208  | 273  | 5.81680243117 |               |

|           |          |      |      |               |               |
|-----------|----------|------|------|---------------|---------------|
| NM_017899 | TESC     | 346  | 607  | 8.13873725711 |               |
| NM_017728 | TMEM104  | 955  | 1009 | 8.43223864689 |               |
| NM_017728 | TMEM104  | 288  | 349  | 10.0172078787 |               |
| NM_017728 | TMEM104  | 1555 | 1603 | 10.4322453779 |               |
| NM_017728 | TMEM104  | 2944 | 3004 | 8.43207162763 |               |
| NM_017728 | TMEM104  | 1807 | 1855 | 8.43207162763 |               |
| NM_017728 | TMEM104  | 1067 | 1124 | 10.4322453779 |               |
| NM_017728 | TMEM104  | 1859 | 1937 | 10.0172078787 |               |
| NM_017728 | TMEM104  | 2726 | 2816 | 11.0172078787 |               |
| NM_017728 | TMEM104  | 1263 | 1313 | 8.43224537795 |               |
| NM_017728 | TMEM104  | 1626 | 1678 | 8.43207162763 |               |
| NM_017728 | TMEM104  | 507  | 580  | 8.34810616856 |               |
| NM_017728 | TMEM104  | 1126 | 1262 | 10.7541734728 |               |
| NM_017728 | TMEM104  | 781  | 948  | 12.1326850961 |               |
| NM_017728 | TMEM104  | 169  | 260  | 10.7541734728 |               |
| NM_017728 | TMEM104  | 584  | 768  | 11.0172078787 |               |
| NM_017895 | DDX27    | 173  | 214  | 3.36372952339 |               |
| NM_017895 | DDX27    | 1143 | 1196 | 4.36757337325 |               |
| NM_017895 | DDX27    | 1229 | 1321 | 3.36774712356 |               |
| NM_017896 | C20orf11 |      | 3722 | 3789          | 4.01487225419 |
| NM_017896 | C20orf11 |      | 4110 | 4161          | 4.59983475491 |
| NM_017896 | C20orf11 |      | 1480 | 1524          | 4.01487225419 |
| NM_017896 | C20orf11 |      | 1398 | 1455          | 5.01487225419 |
| NM_017896 | C20orf11 |      | 3324 | 3417          | 4.01469850388 |
| NM_017896 | C20orf11 |      | 312  | 412           | 4.59983475491 |
| NM_017896 | C20orf11 |      | 3205 | 3279          | 4.59581715474 |
| NM_017892 | PRPF40A  | 2915 | 2988 | 2.71950454451 |               |
| NM_017892 | PRPF40A  | 557  | 606  | 2.6393829353  |               |
| NM_017892 | PRPF40A  | 2239 | 2319 | 3.72352214469 |               |
| NM_017892 | PRPF40A  | 1614 | 1721 | 4.72352214469 |               |
| NM_017892 | PRPF40A  | 1280 | 1342 | 2.72351541363 |               |
| NM_017892 | PRPF40A  | 462  | 504  | 3.6393829353  |               |
| NM_017892 | PRPF40A  | 2626 | 2682 | 2.72352213714 |               |
| NM_017892 | PRPF40A  | 314  | 436  | 5.04545023957 |               |
| NM_017892 | PRPF40A  | 158  | 194  | 3.72334839437 |               |
| NM_017892 | PRPF40A  | 244  | 283  | 3.71950454451 |               |
| NM_017892 | PRPF40A  | 845  | 939  | 5.53087706674 |               |
| NM_017892 | PRPF40A  | 1928 | 2054 | 5.04545023957 |               |
| NM_017721 | CC2D1A   | 388  | 434  | 6.89637945879 |               |
| NM_017721 | CC2D1A   | 3226 | 3297 | 6.90039032791 |               |
| NM_017721 | CC2D1A   | 2291 | 2389 | 6.90039705896 |               |
| NM_017721 | CC2D1A   | 3047 | 3139 | 5.90039032791 |               |
| NM_017721 | CC2D1A   | 2656 | 2704 | 6.90022330865 |               |
| NM_001893 | CSNK1D   | 3415 | 3448 | 5.2172559819  |               |
| NM_001893 | CSNK1D   | 905  | 980  | 6.53935782711 |               |
| NM_001893 | CSNK1D   | 995  | 1039 | 5.21341213205 |               |
| NM_001893 | CSNK1D   | 1543 | 1659 | 7.21742973222 |               |
| NM_001893 | CSNK1D   | 1672 | 1718 | 4.21742972467 |               |
| NM_001893 | CSNK1D   | 1719 | 1785 | 5.217429732   |               |
| NM_001893 | CSNK1D   | 1060 | 1232 | 7.80239223294 |               |

|              |         |      |      |               |
|--------------|---------|------|------|---------------|
| NM_001893    | CSNK1D  | 1892 | 1933 | 5.80221848263 |
| NM_001893    | CSNK1D  | 2477 | 2569 | 5.80239223294 |
| NM_001893    | CSNK1D  | 3341 | 3410 | 4.2172559819  |
| NM_001893    | CSNK1D  | 2093 | 2202 | 5.80239223294 |
| NM_001893    | CSNK1D  | 2593 | 2662 | 4.21341213205 |
| NM_001893    | CSNK1D  | 772  | 808  | 5.2174294963  |
| NM_001893    | CSNK1D  | 3025 | 3086 | 5.21742973222 |
| NM_001893    | CSNK1D  | 1953 | 2045 | 5.21742972467 |
| NM_001893    | CSNK1D  | 636  | 753  | 6.53935782711 |
| NM_001893    | CSNK1D  | 2203 | 2257 | 4.21742300117 |
| NM_001893    | CSNK1D  | 2412 | 2470 | 5.13329052284 |
| NM_001893    | CSNK1D  | 3182 | 3251 | 5.80239223294 |
| NM_001896    | CSNK2A2 | 1014 | 1105 | 3.47774301975 |
| NM_001896    | CSNK2A2 | 644  | 704  | 4.47774278383 |
| NM_001896    | CSNK2A2 | 883  | 1001 | 5.47774301975 |
| NM_001896    | CSNK2A2 | 182  | 247  | 5.06253177015 |
| NM_001896    | CSNK2A2 | 407  | 590  | 6.64766802119 |
| NM_001896    | CSNK2A2 | 709  | 875  | 6.47774301975 |
| NM_001895    | CSNK2A1 | 1350 | 1403 | 4.26838003343 |
| NM_001895    | CSNK2A1 | 1838 | 1879 | 4.26436243326 |
| NM_001895    | CSNK2A1 | 1069 | 1130 | 4.85334252661 |
| NM_001895    | CSNK2A1 | 1446 | 1492 | 5.26838003321 |
| NM_001895    | CSNK2A1 | 2297 | 2362 | 4.26436243326 |
| NM_001895    | CSNK2A1 | 1243 | 1298 | 5.59030812832 |
| NM_001895    | CSNK2A1 | 169  | 255  | 5.26838003343 |
| NM_001895    | CSNK2A1 | 2584 | 2708 | 4.26838003343 |
| NM_001895    | CSNK2A1 | 1135 | 1231 | 4.85334253416 |
| NM_001895    | CSNK2A1 | 1535 | 1670 | 6.43830503488 |
| NM_001895    | CSNK2A1 | 549  | 1056 | 8.82296888511 |
| NM_001895    | CSNK2A1 | 258  | 381  | 5.59030812832 |
| NM_001894    | CSNK1E  | 948  | 1005 | 4.27457234172 |
| NM_001894    | CSNK1E  | 406  | 454  | 5.27439859141 |
| NM_001894    | CSNK1E  | 545  | 589  | 4.27456561067 |
| NM_001894    | CSNK1E  | 616  | 659  | 4.27055474155 |
| NM_001894    | CSNK1E  | 320  | 403  | 6.27457234172 |
| NM_001894    | CSNK1E  | 890  | 939  | 4.27439859141 |
| NM_001100176 | H00K2   | 620  | 693  | 6.88733251353 |
| NM_001100176 | H00K2   | 1747 | 1850 | 7.47229501403 |
| NM_001100176 | H00K2   | 2259 | 2346 | 6.88715876322 |
| NM_001013649 | C2orf68 | 434  | 488  | 5.79242264462 |
| NM_004217    | AURKB   | 633  | 702  | 8.38670214398 |
| NM_004217    | AURKB   | 864  | 938  | 7.9716646447  |
| NM_004217    | AURKB   | 1101 | 1221 | 9.55662714542 |
| NM_004217    | AURKB   | 958  | 1002 | 7.88752543531 |
| NM_004217    | AURKB   | 287  | 379  | 9.38670214398 |
| NM_004217    | AURKB   | 220  | 263  | 7.38669541292 |
| NM_004217    | AURKB   | 1034 | 1081 | 7.38670214398 |
| NM_004217    | AURKB   | 81   | 203  | 8.38670214398 |
| NM_004217    | AURKB   | 518  | 632  | 7.38670214398 |
| NM_004217    | AURKB   | 732  | 857  | 9.38670214398 |

|              |         |      |      |               |
|--------------|---------|------|------|---------------|
| NM_004217    | AURKB   | 383  | 500  | 6.38670214398 |
| NM_004214    | FIBP    | 127  | 212  | 8.64430078261 |
| NM_004214    | FIBP    | 988  | 1061 | 9.22943703365 |
| NM_004214    | FIBP    | 671  | 877  | 10.9664026278 |
| NM_001013642 | TRNP1   | 909  | 1017 | 13.9757755152 |
| NM_001013642 | TRNP1   | 1609 | 1655 | 12.516343889  |
| NM_001013642 | TRNP1   | 0    | 46   | 13.1013063972 |
| NM_001013642 | TRNP1   | 1775 | 1877 | 11.5163438963 |
| NM_001013642 | TRNP1   | 396  | 478  | 10.5163438965 |
| NM_001013642 | TRNP1   | 1052 | 1168 | 14.3236988186 |
| NM_001013642 | TRNP1   | 751  | 901  | 13.3236988186 |
| NM_001013642 | TRNP1   | 165  | 252  | 10.5163438963 |
| NM_001135554 | EPB41L2 | 987  | 1047 | 5.02346401184 |
| NM_001135554 | EPB41L2 | 1415 | 1469 | 3.35436230174 |
| NM_001135554 | EPB41L2 | 1066 | 1111 | 4.43850151112 |
| NM_001135554 | EPB41L2 | 2236 | 2275 | 4.35436230174 |
| NM_001135554 | EPB41L2 | 1157 | 1220 | 4.43849478007 |
| NM_001135554 | EPB41L2 | 1530 | 1593 | 3.43850151112 |
| NM_001135554 | EPB41L2 | 2469 | 2520 | 6.02346401184 |
| NM_001135554 | EPB41L2 | 1243 | 1298 | 4.35436230174 |
| NM_001135554 | EPB41L2 | 2530 | 2592 | 3.35436230174 |
| NM_001135554 | EPB41L2 | 2597 | 2679 | 3.43448391095 |
| NM_001135554 | EPB41L2 | 1882 | 1938 | 4.43448391095 |
| NM_001135554 | EPB41L2 | 169  | 259  | 3.43849478007 |
| NM_020243    | TOMM22  | 452  | 569  | 6.54744836574 |
| NM_020243    | TOMM22  | 692  | 761  | 5.54744163468 |
| NM_020243    | TOMM22  | 961  | 1042 | 6.86937646062 |
| NM_020243    | TOMM22  | 589  | 670  | 6.13241086646 |
| NM_020243    | TOMM22  | 142  | 370  | 7.54744836574 |
| NM_182620    | SKA2    | 432  | 490  | 4.47220049383 |
| NM_182620    | SKA2    | 611  | 692  | 2.88723799311 |
| NM_001142478 | C5orf13 | 852  | 927  | 4.92510406011 |
| NM_001142478 | C5orf13 | 971  | 1129 | 6.92912166028 |
| NM_004603    | STX1A   | 1988 | 2040 | 7.49725573816 |
| NM_004604    | STX4    | 1196 | 1234 | 3.32356164634 |
| NM_004604    | STX4    | 994  | 1116 | 4.91254174723 |
| NM_004359    | CDC34   | 1373 | 1433 | 5.96642747542 |
| NM_004359    | CDC34   | 528  | 603  | 5.64449938053 |
| NM_004359    | CDC34   | 923  | 1076 | 6.45185430259 |
| NM_004359    | CDC34   | 701  | 748  | 3.64432563022 |
| NM_004359    | CDC34   | 858  | 921  | 3.64449938053 |
| NM_004359    | CDC34   | 263  | 331  | 5.96642747542 |
| NM_004359    | CDC34   | 613  | 658  | 5.22946164534 |
| NM_004359    | CDC34   | 792  | 841  | 3.64449938031 |
| NM_004359    | CDC34   | 359  | 505  | 6.22946188126 |
| NM_004358    | CDC25B  | 1543 | 1630 | 7.91604178041 |
| NM_004358    | CDC25B  | 1630 | 1687 | 4.91604177286 |
| NM_004358    | CDC25B  | 2792 | 2840 | 5.91604178041 |
| NM_004358    | CDC25B  | 2932 | 2986 | 5.91604177286 |
| NM_004358    | CDC25B  | 2987 | 3164 | 8.61648149855 |

|              |        |      |      |               |
|--------------|--------|------|------|---------------|
| NM_004358    | CDC25B | 692  | 807  | 4.91604178041 |
| NM_004358    | CDC25B | 2023 | 2246 | 8.08596678186 |
| NM_004358    | CDC25B | 3476 | 3573 | 5.91604178041 |
| NM_004358    | CDC25B | 3248 | 3382 | 6.91604178041 |
| NM_004358    | CDC25B | 1835 | 2013 | 8.2379698753  |
| NM_004358    | CDC25B | 2861 | 2924 | 4.83190257103 |
| NM_004358    | CDC25B | 1011 | 1195 | 7.91604178041 |
| NM_004358    | CDC25B | 2254 | 2500 | 7.72339670247 |
| NM_001131024 | PEX5   | 448  | 540  | 7.85469190018 |
| NM_001131024 | PEX5   | 2435 | 2488 | 7.85469190019 |
| NM_001131024 | PEX5   | 2377 | 2435 | 5.85469189996 |
| NM_001131024 | PEX5   | 2131 | 2185 | 5.85067430001 |
| NM_001131024 | PEX5   | 756  | 846  | 6.85469190019 |
| NM_001131024 | PEX5   | 1297 | 1459 | 7.85469190019 |
| NM_207418    | FAM72D | 860  | 912  | 7.81969332154 |
| NM_207418    | FAM72D | 1005 | 1089 | 9.40867342221 |
| NM_001195532 | SPTAN1 | 5282 | 5356 | 3.31611578901 |
| NM_001195532 | SPTAN1 | 4700 | 4739 | 3.31611578901 |
| NM_001195532 | SPTAN1 | 1378 | 1441 | 5.90107828973 |
| NM_001195532 | SPTAN1 | 4869 | 4968 | 5.31611578901 |
| NM_001195532 | SPTAN1 | 5130 | 5256 | 5.31611578901 |
| NM_001195532 | SPTAN1 | 7057 | 7126 | 4.90107828973 |
| NM_001195532 | SPTAN1 | 1753 | 1813 | 3.31611578901 |
| NM_001195532 | SPTAN1 | 228  | 274  | 4.90107828218 |
| NM_001195532 | SPTAN1 | 3925 | 3991 | 4.31594203869 |
| NM_001195532 | SPTAN1 | 6538 | 6590 | 4.89706068956 |
| NM_001195532 | SPTAN1 | 3006 | 3080 | 4.31611578901 |
| NM_001195532 | SPTAN1 | 3143 | 3238 | 6.12347071107 |
| NM_001195532 | SPTAN1 | 2750 | 2823 | 4.31611578901 |
| NM_001195532 | SPTAN1 | 789  | 830  | 3.31610905795 |
| NM_001195532 | SPTAN1 | 1294 | 1361 | 3.31611578901 |
| NM_001195532 | SPTAN1 | 1079 | 1133 | 4.31610905795 |
| NM_001195532 | SPTAN1 | 7166 | 7232 | 3.31611578901 |
| NM_001195532 | SPTAN1 | 1135 | 1284 | 6.77554740765 |
| NM_001195532 | SPTAN1 | 6478 | 6514 | 4.81693908035 |
| NM_001195532 | SPTAN1 | 7243 | 7340 | 4.31611578146 |
| NM_001195532 | SPTAN1 | 4742 | 4851 | 6.12347071107 |
| NM_001195532 | SPTAN1 | 1443 | 1514 | 4.90107155868 |
| NM_001195532 | SPTAN1 | 4630 | 4697 | 4.90107828973 |
| NM_001195532 | SPTAN1 | 6402 | 6461 | 4.31611578146 |
| NM_001195532 | SPTAN1 | 1826 | 1938 | 6.48604079045 |
| NM_001195532 | SPTAN1 | 7346 | 7405 | 4.31610905795 |
| NM_001195532 | SPTAN1 | 2184 | 2363 | 6.77554740765 |
| NM_001195532 | SPTAN1 | 3801 | 3904 | 5.31611578901 |
| NM_001195532 | SPTAN1 | 2020 | 2174 | 6.6380438839  |
| NM_001195532 | SPTAN1 | 2452 | 2568 | 5.90107828973 |
| NM_001195532 | SPTAN1 | 4190 | 4342 | 5.6380438839  |
| NM_001195532 | SPTAN1 | 2825 | 2972 | 6.6380438839  |
| NM_001195532 | SPTAN1 | 1532 | 1712 | 7.22300638462 |
| NM_001195532 | SPTAN1 | 6818 | 6909 | 4.90107828973 |

|              |          |      |      |                    |
|--------------|----------|------|------|--------------------|
| NM_001195532 | SPTAN1   | 7524 | 7790 | 7.6380438839       |
| NM_001195532 | SPTAN1   | 4391 | 4625 | 7.31611578901      |
| NM_001195532 | SPTAN1   | 7430 | 7524 | 4.90107828973      |
| NM_001195532 | SPTAN1   | 2581 | 2670 | 4.31611578901      |
| NM_001195532 | SPTAN1   | 841  | 1010 | 6.77554740765      |
| NM_001195532 | SPTAN1   | 5358 | 5485 | 5.90107828973      |
| NM_001195532 | SPTAN1   | 3290 | 3770 | 7.6380438839       |
| NM_001195532 | SPTAN1   | 4997 | 5122 | 5.90107828973      |
| NM_001195532 | SPTAN1   | 419  | 770  | 8.17409678414      |
| NM_001195532 | SPTAN1   | 5781 | 6182 | 7.90107828973      |
| NM_001195532 | SPTAN1   | 5588 | 5760 | 5.6380438839       |
| NM_001195532 | SPTAN1   | 6940 | 7057 | 4.90107828973      |
| NM_001195532 | SPTAN1   | 4065 | 4175 | 4.31611578901      |
| NM_001195532 | SPTAN1   | 293  | 364  | 4.31209818884      |
| NM_001135733 | TP53INP1 |      | 5111 | 5191 8.79490514898 |
| NM_000274    | OAT      | 611  | 672  | 8.12005614063      |
| NM_000274    | OAT      | 208  | 285  | 6.53509363991      |
| NM_000274    | OAT      | 783  | 825  | 6.53509363969      |
| NM_000274    | OAT      | 1263 | 1362 | 8.34244856197      |
| NM_000274    | OAT      | 399  | 508  | 8.34244856197      |
| NM_000274    | OAT      | 1937 | 1997 | 6.53509363969      |
| NM_000274    | OAT      | 1012 | 1070 | 7.12005614063      |
| NM_000274    | OAT      | 533  | 590  | 7.53509363236      |
| NM_000274    | OAT      | 1577 | 1642 | 6.53509363991      |
| NM_000274    | OAT      | 1383 | 1468 | 7.85702173479      |
| NM_000274    | OAT      | 1163 | 1251 | 9.12005614063      |
| NM_000274    | OAT      | 292  | 364  | 7.53509363236      |
| NM_000274    | OAT      | 64   | 146  | 8.12005614063      |
| NM_000274    | OAT      | 825  | 997  | 8.70501864135      |
| NM_030799    | YIPF5    | 425  | 464  | 7.52332468151      |
| NM_030799    | YIPF5    | 113  | 162  | 6.60746365497      |
| NM_030799    | YIPF5    | 179  | 250  | 8.60746389089      |
| NM_030799    | YIPF5    | 949  | 1165 | 10.414818813       |
| NM_030799    | YIPF5    | 260  | 319  | 7.60729014057      |
| NM_030799    | YIPF5    | 631  | 924  | 11.0668955095      |
| NM_000277    | PAH      | 1599 | 1638 | 2.87106158557      |
| NM_000277    | PAH      | 2481 | 2545 | 4.95520079494      |
| NM_000277    | PAH      | 1820 | 1877 | 2.95118319478      |
| NM_000277    | PAH      | 692  | 769  | 4.54016329567      |
| NM_000277    | PAH      | 2416 | 2476 | 2.95520079495      |
| NM_000277    | PAH      | 2553 | 2603 | 2.95118319478      |
| NM_000277    | PAH      | 1664 | 1771 | 4.54016329567      |
| NM_000277    | PAH      | 1297 | 1350 | 4.54015656462      |
| NM_000277    | PAH      | 494  | 585  | 4.54016329545      |
| NM_000277    | PAH      | 2164 | 2252 | 2.95520079473      |
| NM_000270    | PNP      | 402  | 439  | 7.52974000817      |
| NM_000270    | PNP      | 57   | 120  | 6.86081204838      |
| NM_000270    | PNP      | 1302 | 1363 | 5.94494452671      |
| NM_000270    | PNP      | 1420 | 1457 | 5.94494452671      |
| NM_000270    | PNP      | 486  | 699  | 9.52991375848      |

|           |          |      |      |                   |
|-----------|----------|------|------|-------------------|
| NM_000270 | PNP      | 1072 | 1151 | 7.52991375848     |
| NM_000270 | PNP      | 733  | 878  | 8.94495125776     |
| NM_000270 | PNP      | 1204 | 1270 | 6.94494452671     |
| NM_000270 | PNP      | 122  | 392  | 10.2668793527     |
| NM_000271 | NPC1     | 3673 | 3781 | 8.7536876042      |
| NM_000271 | NPC1     | 2306 | 2435 | 8.7536876042      |
| NM_000271 | NPC1     | 2218 | 2294 | 7.86060280811     |
| NM_000271 | NPC1     | 341  | 518  | 9.37517598094     |
| NM_000271 | NPC1     | 1304 | 1392 | 7.86060280811     |
| NM_000271 | NPC1     | 4377 | 4461 | 7.05324788606     |
| NM_000271 | NPC1     | 1619 | 1790 | 8.96013848166     |
| NM_000271 | NPC1     | 1795 | 1977 | 8.7536876042      |
| NM_000271 | NPC1     | 1032 | 1082 | 6.63821038678     |
| NM_000271 | NPC1     | 3020 | 3183 | 8.51267950469     |
| NM_000271 | NPC1     | 4120 | 4308 | 8.7536876042      |
| NM_000271 | NPC1     | 2033 | 2172 | 7.86060280811     |
| NM_000271 | NPC1     | 3844 | 4025 | 8.63821038678     |
| NM_000271 | NPC1     | 3515 | 3658 | 8.7536876042      |
| NM_000271 | NPC1     | 2440 | 2896 | 10.6971040758     |
| NM_000271 | NPC1     | 1131 | 1302 | 7.86060280811     |
| NM_000271 | NPC1     | 775  | 995  | 9.2231728875      |
| NM_000271 | NPC1     | 518  | 737  | 8.51267950469     |
| NM_000271 | NPC1     | 3253 | 3467 | 9.14071072731     |
| NM_000271 | NPC1     | 2903 | 3016 | 8.05324788606     |
| NM_000271 | NPC1     | 1436 | 1617 | 9.05324788606     |
| NM_022451 | NOC3L    | 378  | 452  | 5.75062832766     |
| NM_022451 | NOC3L    | 1010 | 1150 | 7.15669563193     |
| NM_030790 | ITFG1    | 1708 | 1823 | 8.40417156549     |
| NM_030790 | ITFG1    | 642  | 715  | 7.70373184735     |
| NM_030790 | ITFG1    | 1232 | 1317 | 5.70373184735     |
| NM_030790 | ITFG1    | 718  | 752  | 4.70355809703     |
| NM_030790 | ITFG1    | 762  | 903  | 8.16316346599     |
| NM_030790 | ITFG1    | 1639 | 1686 | 5.7037251163      |
| NM_030790 | ITFG1    | 1344 | 1376 | 4.61959263797     |
| NM_030790 | ITFG1    | 356  | 489  | 8.28869434807     |
| NM_030790 | ITFG1    | 496  | 571  | 6.70373184735     |
| NM_030790 | ITFG1    | 1907 | 1981 | 5.7037318398      |
| NM_030790 | ITFG1    | 2090 | 2166 | 4.70373184735     |
| NM_030790 | ITFG1    | 1388 | 1635 | 8.7911946886      |
| NM_030790 | ITFG1    | 239  | 299  | 5.69971424718     |
| NM_030790 | ITFG1    | 1072 | 1187 | 6.70373184735     |
| NM_030791 | SGPP1    | 1244 | 1307 | 10.0089295538     |
| NM_030791 | SGPP1    | 1127 | 1210 | 9.01294715393     |
| NM_030791 | SGPP1    | 1051 | 1098 | 10.5979096546     |
| NM_030791 | SGPP1    | 487  | 620  | 11.820302076      |
| NM_030791 | SGPP1    | 894  | 1043 | 12.3348752488     |
| NM_030791 | SGPP1    | 754  | 889  | 12.1828721554     |
| NM_030791 | SGPP1    | 2027 | 2126 | 10.0129404229     |
| NM_017794 | KIAA1797 |      | 203  | 246 8.37772235795 |
| NM_030796 | VOPP1    | 1120 | 1159 | 8.41696396672     |

|           |       |      |      |               |
|-----------|-------|------|------|---------------|
| NM_030796 | VOPP1 | 850  | 945  | 11.504433539  |
| NM_030796 | VOPP1 | 1943 | 2016 | 11.0019331985 |
| NM_030796 | VOPP1 | 2370 | 2429 | 7.41697046185 |
| NM_030796 | VOPP1 | 2171 | 2260 | 11.0019331985 |
| NM_030796 | VOPP1 | 746  | 839  | 10.4169706978 |
| NM_030796 | VOPP1 | 1871 | 1919 | 7.33283148839 |
| NM_030796 | VOPP1 | 1397 | 1565 | 11.6648982112 |
| NM_030796 | VOPP1 | 1160 | 1286 | 10.8764023164 |
| NM_030796 | VOPP1 | 2770 | 2942 | 11.4169706978 |
| NM_030796 | VOPP1 | 1692 | 1867 | 10.2243256198 |
| NM_030796 | VOPP1 | 1298 | 1381 | 8.41697069777 |
| NM_030796 | VOPP1 | 183  | 463  | 12.5462537147 |
| NM_030796 | VOPP1 | 2527 | 2707 | 11.504433539  |
| NM_030796 | VOPP1 | 966  | 1058 | 8.41697069777 |
| NM_030796 | VOPP1 | 2024 | 2156 | 10.0019331985 |
| NM_030796 | VOPP1 | 520  | 621  | 9.73889879266 |
| NM_145726 | TRAF3 | 3913 | 3956 | 6.67677673013 |
| NM_145726 | TRAF3 | 6401 | 6465 | 7.75689833934 |
| NM_145726 | TRAF3 | 6918 | 6981 | 7.67677673013 |
| NM_145726 | TRAF3 | 6582 | 6654 | 6.76091593951 |
| NM_145726 | TRAF3 | 3169 | 3240 | 7.75689833934 |
| NM_006603 | STAG2 | 3076 | 3152 | 7.3531106939  |
| NM_006603 | STAG2 | 821  | 940  | 6.13071826501 |
| NM_006603 | STAG2 | 2848 | 2901 | 6.54574904078 |
| NM_006603 | STAG2 | 3904 | 3945 | 6.13054452224 |
| NM_006603 | STAG2 | 3847 | 3901 | 5.54575576429 |
| NM_006603 | STAG2 | 3956 | 4037 | 6.54575577162 |
| NM_006603 | STAG2 | 5284 | 5322 | 5.46161656245 |
| NM_006603 | STAG2 | 5408 | 5461 | 4.54574904078 |
| NM_006603 | STAG2 | 5584 | 5639 | 5.54575577162 |
| NM_006603 | STAG2 | 3412 | 3470 | 5.54575553592 |
| NM_006603 | STAG2 | 4175 | 4233 | 6.54575553592 |
| NM_006603 | STAG2 | 1341 | 1375 | 4.54558202152 |
| NM_006603 | STAG2 | 5731 | 5811 | 6.13071827256 |
| NM_006603 | STAG2 | 1222 | 1306 | 5.54575577183 |
| NM_006603 | STAG2 | 4785 | 4831 | 6.54575577183 |
| NM_006603 | STAG2 | 966  | 1097 | 4.54575577184 |
| NM_006603 | STAG2 | 2211 | 2320 | 4.54173817166 |
| NM_006603 | STAG2 | 2355 | 2508 | 7.13071827256 |
| NM_006603 | STAG2 | 191  | 285  | 4.54575576429 |
| NM_006603 | STAG2 | 499  | 628  | 7.13071827256 |
| NM_006603 | STAG2 | 3581 | 3833 | 8.00518739048 |
| NM_006603 | STAG2 | 1786 | 1893 | 6.86768386673 |
| NM_006603 | STAG2 | 3230 | 3328 | 7.13071827256 |
| NM_006603 | STAG2 | 1483 | 1597 | 4.54575577183 |
| NM_006603 | STAG2 | 2646 | 2835 | 7.86768386673 |
| NM_006603 | STAG2 | 1903 | 2119 | 7.71568077328 |
| NM_006603 | STAG2 | 1653 | 1768 | 7.54575577184 |
| NM_006603 | STAG2 | 640  | 725  | 6.54575553592 |
| NM_006603 | STAG2 | 2548 | 2635 | 6.54575577184 |



|              |        |      |      |                 |
|--------------|--------|------|------|-----------------|
| NM_153759    | DNMT3A | 1949 | 2034 | 7.50175131924   |
| NM_006601    | PTGES3 | 1414 | 1451 | -0.452644933795 |
| NM_006601    | PTGES3 | 1727 | 1808 | 1.35872758844   |
| NM_006601    | PTGES3 | 1682 | 1726 | -0.44880108394  |
| NM_006601    | PTGES3 | 413  | 658  | 3.68065568332   |
| NM_006601    | PTGES3 | 1110 | 1178 | 0.551372658828  |
| NM_006601    | PTGES3 | 217  | 256  | -0.532766543006 |
| NM_006601    | PTGES3 | 156  | 217  | 0.13633515955   |
| NM_006601    | PTGES3 | 1895 | 2016 | 0.136335167099  |
| NM_006601    | PTGES3 | 1824 | 1894 | 0.136335167099  |
| NM_006601    | PTGES3 | 1186 | 1394 | 2.63883550763   |
| NM_006601    | PTGES3 | 1453 | 1635 | 2.35872758844   |
| NM_006601    | PTGES3 | 679  | 993  | 3.55137266638   |
| NM_006600    | NUDC   | 1179 | 1220 | 4.37616025998   |
| NM_006600    | NUDC   | 152  | 250  | 3.37616025997   |
| NM_006600    | NUDC   | 557  | 634  | 2.37616025998   |
| NM_006600    | NUDC   | 1104 | 1174 | 3.9611227607    |
| NM_006600    | NUDC   | 1320 | 1376 | 3.9611227607    |
| NM_006600    | NUDC   | 439  | 521  | 3.37616025998   |
| NM_006600    | NUDC   | 644  | 1095 | 6.83559187861   |
| NM_001128631 | DCAKD  | 353  | 394  | 7.25606906942   |
| NM_001128631 | DCAKD  | 167  | 236  | 8.25606234592   |
| NM_001128631 | DCAKD  | 1603 | 1688 | 8.25606907697   |
| NM_006609    | MAP3K2 | 4312 | 4380 | 7.62999629749   |
| NM_006609    | MAP3K2 | 2468 | 2539 | 6.62597870486   |
| NM_006609    | MAP3K2 | 8892 | 8976 | 6.62597870486   |
| NM_006609    | MAP3K2 | 5111 | 5182 | 6.54585709565   |
| NM_006609    | MAP3K2 | 4924 | 4998 | 8.21495879821   |
| NM_006608    | PHTF1  | 838  | 906  | 9.3062771544    |
| NM_006608    | PHTF1  | 733  | 775  | 7.72114090358   |
| NM_025061    | LRR8E  | 1026 | 1097 | 10.0196162829   |
| NM_025061    | LRR8E  | 1393 | 1498 | 10.0196162829   |
| NM_025061    | LRR8E  | 1126 | 1181 | 8.01960955186   |
| NM_025061    | LRR8E  | 461  | 547  | 9.01961627537   |
| NM_025061    | LRR8E  | 2221 | 2294 | 9.60457205258   |
| NM_025065    | RPF1   | 794  | 853  | 4.00353739914   |
| NM_025065    | RPF1   | 1113 | 1267 | 6.00354413019   |
| NM_001128325 | SPON2  | 1051 | 1081 | 7.12841750609   |
| NM_001128325 | SPON2  | 1477 | 1523 | 6.12824375577   |
| NM_001128325 | SPON2  | 658  | 710  | 7.12841727017   |
| NM_001128325 | SPON2  | 191  | 253  | 7.12841750609   |
| NM_001128325 | SPON2  | 1527 | 1578 | 7.71337999926   |
| NM_001128325 | SPON2  | 393  | 452  | 7.71338000681   |
| NM_001128325 | SPON2  | 1084 | 1183 | 8.45034560098   |
| NM_001128325 | SPON2  | 138  | 187  | 6.12824375577   |
| NM_001128325 | SPON2  | 1362 | 1432 | 7.12841750609   |
| NM_001128325 | SPON2  | 1725 | 1810 | 8.93577242815   |
| NM_001128325 | SPON2  | 745  | 796  | 8.12841750608   |
| NM_001128325 | SPON2  | 1592 | 1690 | 8.93577242815   |
| NM_001128325 | SPON2  | 798  | 973  | 8.12841750609   |

|              |          |      |      |                   |
|--------------|----------|------|------|-------------------|
| NM_001128325 | SPON2    | 495  | 630  | 8.45034560098     |
| NM_001128325 | SPON2    | 280  | 345  | 6.12439990592     |
| NM_000689    | ALDH1A1  | 1782 | 1850 | 4.94620451964     |
| NM_000689    | ALDH1A1  | 1012 | 1207 | 7.80418551477     |
| NM_000689    | ALDH1A1  | 1387 | 1772 | 8.15565788527     |
| NM_000689    | ALDH1A1  | 1215 | 1387 | 7.40563613828     |
| NM_000689    | ALDH1A1  | 1907 | 2355 | 8.7535594417      |
| NM_000689    | ALDH1A1  | 267  | 905  | 9.33852194242     |
| NM_001199196 | ARMC6    | 459  | 501  | 7.76465576843     |
| NM_001199196 | ARMC6    | 1519 | 1588 | 7.8486212275      |
| NM_001199196 | ARMC6    | 993  | 1087 | 9.65614989987     |
| NM_001199196 | ARMC6    | 908  | 955  | 7.8486212275      |
| NM_001199196 | ARMC6    | 1274 | 1332 | 8.43375074748     |
| NM_001199196 | ARMC6    | 1869 | 1932 | 6.8486212275      |
| NM_001199196 | ARMC6    | 592  | 690  | 8.43375747854     |
| NM_001199196 | ARMC6    | 1348 | 1517 | 9.1707230727      |
| NM_139157    | ST5      | 1863 | 1936 | 7.24199715891     |
| NM_139157    | ST5      | 896  | 961  | 8.24199066378     |
| NM_139157    | ST5      | 1641 | 1782 | 8.82695989555     |
| NM_139157    | ST5      | 219  | 299  | 7.24182364451     |
| NM_139157    | ST5      | 403  | 463  | 8.8269531645      |
| NM_139157    | ST5      | 2135 | 2224 | 7.24199739483     |
| NM_139157    | ST5      | 1444 | 1545 | 8.24199739482     |
| NM_016417    | GLRX5    | 605  | 667  | 3.11438653285     |
| NM_016417    | GLRX5    | 354  | 428  | 4.1143932639      |
| NM_016417    | GLRX5    | 832  | 913  | 3.11438653285     |
| NM_016417    | GLRX5    | 439  | 518  | 2.1143932639      |
| NM_016417    | GLRX5    | 694  | 797  | 4.1143932639      |
| NM_016410    | CHMP5    | 1095 | 1131 | 4.02304556923     |
| NM_016410    | CHMP5    | 394  | 434  | 2.52221554684     |
| NM_016410    | CHMP5    | 568  | 623  | 4.1071847784      |
| NM_016410    | CHMP5    | 656  | 781  | 5.10718477862     |
| NM_016410    | CHMP5    | 247  | 341  | 4.5222222779      |
| NM_032818    | C9orf100 |      | 543  | 614 10.661412361  |
| NM_032818    | C9orf100 |      | 344  | 417 9.07644336518 |
| NM_172232    | ABCA5    | 3560 | 3616 | 9.0142418432      |
| NM_172232    | ABCA5    | 5128 | 5196 | 8.0142418432      |
| NM_172232    | ABCA5    | 3673 | 3730 | 9.01424183587     |
| NM_172232    | ABCA5    | 1683 | 1751 | 6.93010263404     |
| NM_172232    | ABCA5    | 1368 | 1405 | 7.01022424325     |
| NM_172232    | ABCA5    | 3318 | 3368 | 8.59518674397     |
| NM_172232    | ABCA5    | 3777 | 3833 | 8.59919761309     |
| NM_172232    | ABCA5    | 4299 | 4361 | 7.0142416075      |
| NM_172232    | ABCA5    | 1188 | 1290 | 7.01022424325     |
| NM_172232    | ABCA5    | 4948 | 5120 | 7.01424184342     |
| NM_172232    | ABCA5    | 4119 | 4189 | 8.59903059382     |
| NM_172232    | ABCA5    | 1034 | 1185 | 9.82159676548     |
| NM_172232    | ABCA5    | 3415 | 3527 | 8.59920434414     |
| NM_172232    | ABCA5    | 2796 | 2858 | 8.0142416075      |
| NM_172230    | SYVN1    | 2447 | 2503 | 8.12335928009     |

|              |        |      |      |               |
|--------------|--------|------|------|---------------|
| NM_172230    | SYVN1  | 2928 | 2985 | 9.70430418063 |
| NM_172230    | SYVN1  | 655  | 735  | 10.9307142021 |
| NM_172230    | SYVN1  | 2163 | 2253 | 9.70832178081 |
| NM_172230    | SYVN1  | 889  | 1047 | 11.445287375  |
| NM_172230    | SYVN1  | 1497 | 1644 | 10.1233592801 |
| NM_172230    | SYVN1  | 1063 | 1108 | 9.70814803049 |
| NM_172230    | SYVN1  | 2293 | 2443 | 10.7083217808 |
| NM_172230    | SYVN1  | 1859 | 1978 | 10.1233592801 |
| NM_172230    | SYVN1  | 1695 | 1764 | 9.70832178081 |
| NM_172230    | SYVN1  | 738  | 877  | 9.70832178081 |
| NM_172230    | SYVN1  | 1170 | 1257 | 9.12335904417 |
| NM_172230    | SYVN1  | 2718 | 2817 | 11.1233592801 |
| NM_172230    | SYVN1  | 93   | 651  | 13.9813402752 |
| NM_001098210 | CTNNB1 | 2728 | 2811 | 6.61001263013 |
| NM_001098210 | CTNNB1 | 48   | 79   | 3.90956618093 |
| NM_001098210 | CTNNB1 | 2822 | 2886 | 4.90957291198 |
| NM_001098210 | CTNNB1 | 2888 | 2927 | 3.90957291198 |
| NM_001098210 | CTNNB1 | 1887 | 1937 | 2.8254337026  |
| NM_001098210 | CTNNB1 | 1704 | 1874 | 6.49453541271 |
| NM_001098210 | CTNNB1 | 174  | 605  | 8.46416176366 |
| NM_001098210 | CTNNB1 | 3168 | 3207 | 2.90956618093 |
| NM_001098210 | CTNNB1 | 1136 | 1701 | 9.01809736876 |
| NM_001098210 | CTNNB1 | 982  | 1129 | 6.49453541271 |
| NM_001098210 | CTNNB1 | 637  | 821  | 6.71692783404 |
| NM_001098210 | CTNNB1 | 3058 | 3152 | 4.90957291198 |
| NM_001098210 | CTNNB1 | 1983 | 2704 | 9.05932003149 |
| NM_001098210 | CTNNB1 | 845  | 982  | 6.49453541271 |
| NM_172236    | POFUT1 | 168  | 283  | 10.5285864243 |
| NM_172236    | POFUT1 | 497  | 585  | 9.00502446824 |
| NM_172236    | POFUT1 | 343  | 406  | 7.58998696896 |
| NM_172236    | POFUT1 | 284  | 336  | 6.00502423232 |
| NM_172236    | POFUT1 | 49   | 107  | 6.00100686807 |
| NM_172236    | POFUT1 | 428  | 485  | 7.00502423232 |
| NM_172236    | POFUT1 | 6    | 38   | 7.00100686807 |
| NM_172236    | POFUT1 | 117  | 167  | 6.00501773719 |
| NM_000853    | GSTT1  | 90   | 175  | 7.88679890694 |
| NM_000853    | GSTT1  | 443  | 505  | 6.30183640622 |
| NM_000853    | GSTT1  | 356  | 431  | 6.30183639867 |
| NM_000854    | GSTT2  | 264  | 358  | 10.0352758803 |
| NM_000854    | GSTT2  | 366  | 421  | 10.0312582802 |
| NM_032242    | PLXNA1 | 4452 | 4632 | 9.90593008115 |
| NM_032242    | PLXNA1 | 4122 | 4181 | 6.90575633083 |
| NM_032242    | PLXNA1 | 3770 | 3811 | 7.9059233501  |
| NM_032242    | PLXNA1 | 1672 | 1749 | 7.90592984523 |
| NM_032242    | PLXNA1 | 6581 | 6662 | 7.90593008115 |
| NM_032242    | PLXNA1 | 974  | 1054 | 7.90593008115 |
| NM_032242    | PLXNA1 | 2313 | 2368 | 8.49089234595 |
| NM_032242    | PLXNA1 | 1750 | 1845 | 9.22785817604 |
| NM_032242    | PLXNA1 | 1275 | 1350 | 8.90593008115 |
| NM_032242    | PLXNA1 | 5402 | 5462 | 6.9059233501  |

|              |        |      |      |               |
|--------------|--------|------|------|---------------|
| NM_032242    | PLXNA1 | 2095 | 2141 | 8.82179087177 |
| NM_032242    | PLXNA1 | 8173 | 8239 | 6.90593008093 |
| NM_032242    | PLXNA1 | 2371 | 2460 | 7.90575633083 |
| NM_032242    | PLXNA1 | 5016 | 5099 | 8.49089258187 |
| NM_032242    | PLXNA1 | 1167 | 1230 | 7.90191248098 |
| NM_032242    | PLXNA1 | 1373 | 1419 | 6.90191248098 |
| NM_032242    | PLXNA1 | 6918 | 7047 | 9.49089258187 |
| NM_032242    | PLXNA1 | 3002 | 3032 | 7.90575633083 |
| NM_032242    | PLXNA1 | 3489 | 3624 | 8.90593008115 |
| NM_032242    | PLXNA1 | 2164 | 2233 | 6.90191248098 |
| NM_032242    | PLXNA1 | 314  | 469  | 8.90593008115 |
| NM_032242    | PLXNA1 | 47   | 89   | 6.9059233501  |
| NM_032242    | PLXNA1 | 1493 | 1611 | 8.49089258187 |
| NM_032242    | PLXNA1 | 7753 | 7788 | 7.82179087177 |
| NM_032242    | PLXNA1 | 1893 | 1981 | 7.90593008115 |
| NM_032242    | PLXNA1 | 5623 | 5700 | 7.82179087177 |
| NM_032242    | PLXNA1 | 4684 | 4751 | 6.90593008115 |
| NM_032242    | PLXNA1 | 4237 | 4335 | 8.49089258187 |
| NM_032242    | PLXNA1 | 3920 | 4026 | 8.90593008115 |
| NM_032242    | PLXNA1 | 6678 | 6820 | 8.90593008115 |
| NM_032242    | PLXNA1 | 5282 | 5357 | 8.49089258187 |
| NM_032242    | PLXNA1 | 674  | 752  | 8.49089258187 |
| NM_032242    | PLXNA1 | 3362 | 3489 | 8.90593008115 |
| NM_032242    | PLXNA1 | 2647 | 2802 | 8.90593008115 |
| NM_032242    | PLXNA1 | 787  | 910  | 9.22785817604 |
| NM_032242    | PLXNA1 | 120  | 254  | 8.49089258187 |
| NM_032242    | PLXNA1 | 7117 | 7269 | 10.0758550826 |
| NM_032242    | PLXNA1 | 3648 | 3762 | 9.22785817604 |
| NM_001136558 | GPR107 | 3081 | 3138 | 7.51367810363 |
| NM_001136558 | GPR107 | 1580 | 1620 | 7.51367787526 |
| NM_001136558 | GPR107 | 1625 | 1650 | 7.51350436086 |
| NM_001136558 | GPR107 | 2465 | 2505 | 6.42953890179 |
| NM_001136558 | GPR107 | 952  | 999  | 6.51367810363 |
| NM_001136558 | GPR107 | 4829 | 4889 | 6.509660511   |
| NM_001136558 | GPR107 | 4738 | 4811 | 8.51367811117 |
| NM_001136558 | GPR107 | 3578 | 3617 | 7.509660511   |
| NM_001136558 | GPR107 | 1182 | 1228 | 8.09863388084 |
| NM_001136558 | GPR107 | 2909 | 2945 | 7.42953890179 |
| NM_001136558 | GPR107 | 3139 | 3232 | 7.509660511   |
| NM_001136558 | GPR107 | 4215 | 4287 | 6.51367810363 |
| NM_001136558 | GPR107 | 500  | 633  | 9.83560620606 |
| NM_001136558 | GPR107 | 1390 | 1477 | 8.51367811117 |
| NM_001136558 | GPR107 | 1971 | 2061 | 6.51367138012 |
| NM_001136558 | GPR107 | 380  | 500  | 9.32103303323 |
| NM_001136558 | GPR107 | 2226 | 2421 | 9.0986406119  |
| NM_001136558 | GPR107 | 1258 | 1376 | 9.68360311262 |
| NM_001136558 | GPR107 | 1016 | 1169 | 9.83560620606 |
| NM_001136558 | GPR107 | 1655 | 1803 | 9.0986406119  |
| NM_000858    | GUK1   | 591  | 669  | 5.84217048798 |
| NM_000858    | GUK1   | 436  | 480  | 5.17306877788 |

|              |          |      |      |               |               |
|--------------|----------|------|------|---------------|---------------|
| NM_000858    | GUK1     | 494  | 554  | 5.84217048044 |               |
| NM_000858    | GUK1     | 1056 | 1152 | 6.57913608193 |               |
| NM_000858    | GUK1     | 129  | 242  | 6.84217048044 |               |
| NM_001193557 | ENY2     | 220  | 281  | 1.77073621391 |               |
| NM_001193557 | ENY2     | 178  | 211  | 2.76671861374 |               |
| NM_001136554 | TLK1     | 228  | 293  | 3.74220145467 |               |
| NM_001136554 | TLK1     | 713  | 809  | 4.32716418376 |               |
| NM_001136554 | TLK1     | 2434 | 2471 | 2.74219495953 |               |
| NM_001136554 | TLK1     | 1556 | 1629 | 2.73818409042 |               |
| NM_005530    | IDH3A    | 791  | 856  | 7.84048520578 |               |
| NM_005530    | IDH3A    | 354  | 426  | 6.25552269751 |               |
| NM_001202476 | UBE2E1   | 366  | 439  | 7.78467277396 |               |
| NM_001202476 | UBE2E1   | 645  | 699  | 6.78467277373 |               |
| NM_001202476 | UBE2E1   | 304  | 352  | 5.78449902364 |               |
| NM_001202476 | UBE2E1   | 947  | 1016 | 5.78065517378 |               |
| NM_001202476 | UBE2E1   | 451  | 523  | 6.7846660429  |               |
| NM_001202476 | UBE2E1   | 1051 | 1207 | 7.78467277396 |               |
| NM_145230    | ATP6V0E2 |      | 1810 | 1884          | 11.1303494716 |
| NM_145230    | ATP6V0E2 |      | 1360 | 1432          | 10.7153119723 |
| NM_145230    | ATP6V0E2 |      | 2456 | 2525          | 11.9377043937 |
| NM_145230    | ATP6V0E2 |      | 1210 | 1262          | 10.715138222  |
| NM_145230    | ATP6V0E2 |      | 1958 | 2020          | 9.1301757213  |
| NM_145230    | ATP6V0E2 |      | 2618 | 2698          | 11.1303494716 |
| NM_145230    | ATP6V0E2 |      | 1588 | 1639          | 10.715138222  |
| NM_145230    | ATP6V0E2 |      | 2026 | 2106          | 10.1303427406 |
| NM_003312    | TST      | 52   | 108  | 5.69942854834 |               |
| NM_003312    | TST      | 703  | 765  | 6.70343941746 |               |
| NM_003312    | TST      | 1052 | 1125 | 5.70344614851 |               |
| NM_003312    | TST      | 454  | 488  | 5.61930693913 |               |
| NM_003312    | TST      | 644  | 701  | 7.28439104906 |               |
| NM_003312    | TST      | 110  | 173  | 6.70327239819 |               |
| NM_003312    | TST      | 882  | 1014 | 6.70344614851 |               |
| NM_002729    | HHEX     | 1378 | 1432 | 4.93360598643 |               |
| NM_002729    | HHEX     | 1566 | 1621 | 5.01372759565 |               |
| NM_002729    | HHEX     | 1211 | 1285 | 7.01774519582 |               |
| NM_002729    | HHEX     | 980  | 1021 | 4.93360598643 |               |
| NM_002729    | HHEX     | 828  | 960  | 6.60270769632 |               |
| NM_002720    | PPP4C    | 1050 | 1119 | 5.44775832023 |               |
| NM_002720    | PPP4C    | 617  | 668  | 3.12583022534 |               |
| NM_002720    | PPP4C    | 747  | 781  | 4.71061897574 |               |
| NM_002720    | PPP4C    | 463  | 611  | 7.03272082095 |               |
| NM_002720    | PPP4C    | 1120 | 1239 | 6.29575522678 |               |
| NM_002720    | PPP4C    | 998  | 1036 | 3.12582349429 |               |
| NM_002720    | PPP4C    | 102  | 463  | 8.25511324228 |               |
| NM_002720    | PPP4C    | 846  | 977  | 6.58526184398 |               |
| NM_002721    | PPP6C    | 209  | 297  | 7.10849003765 |               |
| NM_002721    | PPP6C    | 1044 | 1116 | 7.10849003765 |               |
| NM_002721    | PPP6C    | 549  | 605  | 7.52352080588 |               |
| NM_002721    | PPP6C    | 393  | 451  | 5.51950993676 |               |
| NM_002721    | PPP6C    | 808  | 841  | 7.10849003743 |               |

|           |          |      |      |                    |
|-----------|----------|------|------|--------------------|
| NM_002721 | PPP6C    | 719  | 797  | 8.10849003765      |
| NM_002721 | PPP6C    | 999  | 1038 | 7.51950993676      |
| NM_002721 | PPP6C    | 1558 | 1657 | 6.52352753693      |
| NM_002726 | PREP     | 417  | 467  | 7.69898848203      |
| NM_002726 | PREP     | 1950 | 2079 | 9.28412473307      |
| NM_002726 | PREP     | 564  | 661  | 8.28412473307      |
| NM_002726 | PREP     | 2570 | 2646 | 7.69916223212      |
| NM_002726 | PREP     | 298  | 370  | 8.69916223235      |
| NM_002726 | PREP     | 1759 | 1815 | 6.69514463217      |
| NM_002726 | PREP     | 1823 | 1878 | 7.69916223212      |
| NM_002726 | PREP     | 2351 | 2396 | 7.61502302296      |
| NM_002726 | PREP     | 2295 | 2327 | 6.61502302296      |
| NM_002726 | PREP     | 740  | 802  | 8.69514463217      |
| NM_002726 | PREP     | 1160 | 1237 | 9.02109031968      |
| NM_002726 | PREP     | 2108 | 2184 | 6.69898848203      |
| NM_002726 | PREP     | 1304 | 1429 | 9.02109032723      |
| NM_002726 | PREP     | 836  | 1130 | 11.0914796551      |
| NM_031463 | HSDL1    | 93   | 207  | 6.01587271826      |
| NM_031463 | HSDL1    | 2519 | 2548 | 4.93174023993      |
| NM_031463 | HSDL1    | 1554 | 1700 | 7.3378075442       |
| NM_031463 | HSDL1    | 510  | 620  | 7.01587944931      |
| NM_031469 | SH3BGRL2 |      | 186  | 271 7.02660154656  |
| NM_031469 | SH3BGRL2 |      | 2271 | 2316 5.02258394661 |
| NM_031469 | SH3BGRL2 |      | 620  | 666 6.02642779646  |
| NM_031469 | SH3BGRL2 |      | 3553 | 3611 5.02642779646 |
| NM_031469 | SH3BGRL2 |      | 4502 | 4595 5.02660153923 |
| NM_024624 | SMC6     | 249  | 328  | 4.40067078893      |
| NM_024624 | SMC6     | 3235 | 3304 | 4.39665318897      |
| NM_024624 | SMC6     | 3373 | 3517 | 4.98563328987      |
| NM_024624 | SMC6     | 3524 | 3592 | 4.98562655881      |
| NM_024624 | SMC6     | 1085 | 1169 | 4.98545953955      |
| NM_024627 | C22orf29 |      | 627  | 706 11.1958254007  |
| NM_024627 | C22orf29 |      | 1721 | 1770 10.5268974409 |
| NM_024622 | FASTKD1  | 2158 | 2220 | 8.10913039569      |
| NM_024629 | MLF1IP   | 1342 | 1395 | 9.26593985262      |
| NM_024629 | MLF1IP   | 2061 | 2109 | 7.18180065079      |
| NM_024629 | MLF1IP   | 318  | 396  | 8.26593312912      |
| NM_024629 | MLF1IP   | 164  | 297  | 9.85090236089      |
| NM_023933 | FAM173A  | 835  | 872  | 7.43671176577      |
| NM_023933 | FAM173A  | 365  | 410  | 9.02167426649      |
| NM_023933 | FAM173A  | 511  | 593  | 9.75881361098      |
| NM_023933 | FAM173A  | 676  | 757  | 9.02184128576      |
| NM_023934 | FUNDC2   | 235  | 298  | 4.9012048012       |
| NM_023934 | FUNDC2   | 914  | 979  | 5.31624903131      |
| NM_023934 | FUNDC2   | 530  | 613  | 4.31624903131      |
| NM_023934 | FUNDC2   | 999  | 1078 | 4.90121153224      |
| NM_023935 | DDRGK1   | 19   | 91   | 6.01553858079      |
| NM_023935 | DDRGK1   | 425  | 490  | 3.43057584415      |
| NM_023935 | DDRGK1   | 282  | 425  | 5.75250417496      |
| NM_023935 | DDRGK1   | 1078 | 1117 | 3.43040232975      |

|              |        |      |      |               |
|--------------|--------|------|------|---------------|
| NM_023935    | DDRGK1 | 950  | 1035 | 4.43057608007 |
| NM_023935    | DDRGK1 | 579  | 891  | 7.82289350285 |
| NM_023936    | MRPS34 | 89   | 171  | 3.49236984818 |
| NM_023936    | MRPS34 | 332  | 374  | 4.4082306388  |
| NM_023936    | MRPS34 | 374  | 420  | 3.49236984796 |
| NM_023936    | MRPS34 | 768  | 835  | 6.66229484962 |
| NM_023936    | MRPS34 | 535  | 580  | 3.49219609786 |
| NM_023936    | MRPS34 | 592  | 642  | 5.07331474873 |
| NM_023936    | MRPS34 | 228  | 303  | 5.0773323489  |
| NM_023937    | MRPL34 | 594  | 671  | 9.10406598353 |
| NM_023937    | MRPL34 | 672  | 894  | 10.6890284842 |
| NM_016261    | TUBD1  | 309  | 359  | 7.50805103307 |
| NM_016261    | TUBD1  | 1493 | 1535 | 6.50805103307 |
| NM_016261    | TUBD1  | 443  | 518  | 7.58817264228 |
| NM_001077199 | SREK1  | 5931 | 5966 | 3.82767537273 |
| NM_001077199 | SREK1  | 3426 | 3477 | 4.82784912305 |
| NM_001077199 | SREK1  | 259  | 305  | 3.74370991367 |
| NM_001077199 | SREK1  | 1054 | 1126 | 4.82784912283 |
| NM_001077199 | SREK1  | 3876 | 3942 | 5.41280489272 |
| NM_001077199 | SREK1  | 2639 | 2696 | 5.41281162377 |
| NM_001077199 | SREK1  | 2536 | 2612 | 6.41281162377 |
| NM_001077199 | SREK1  | 3961 | 4018 | 4.82784912305 |
| NM_001077199 | SREK1  | 1848 | 1996 | 5.82784912305 |
| NM_001077199 | SREK1  | 145  | 255  | 5.82784912305 |
| NM_001077199 | SREK1  | 705  | 865  | 6.41281162377 |
| NM_001077199 | SREK1  | 3197 | 3327 | 3.82784912305 |
| NM_001077199 | SREK1  | 3645 | 3832 | 6.41281162377 |
| NM_001077199 | SREK1  | 2242 | 2501 | 7.28728074169 |
| NM_031206    | LAS1L  | 968  | 1049 | 6.8996894343  |
| NM_031206    | LAS1L  | 1173 | 1245 | 6.3107093334  |
| NM_031206    | LAS1L  | 321  | 412  | 7.31472693335 |
| NM_031206    | LAS1L  | 583  | 635  | 6.3107093334  |
| NM_031203    | HNRNPM | 1803 | 1891 | 4.77132288181 |
| NM_031203    | HNRNPM | 955  | 990  | 3.77131615076 |
| NM_031203    | HNRNPM | 1460 | 1518 | 4.77132288181 |
| NM_031203    | HNRNPM | 311  | 452  | 5.77132288181 |
| NM_031203    | HNRNPM | 1018 | 1118 | 3.77132288181 |
| NM_031203    | HNRNPM | 2265 | 2416 | 7.16364030459 |
| NM_031203    | HNRNPM | 455  | 738  | 7.47176259996 |
| NM_031203    | HNRNPM | 885  | 952  | 4.35628538254 |
| NM_031203    | HNRNPM | 2065 | 2261 | 7.0932509767  |
| NM_031203    | HNRNPM | 1925 | 2046 | 5.77132288181 |
| NM_031203    | HNRNPM | 773  | 813  | 2.77131615076 |
| NM_031203    | HNRNPM | 1526 | 1678 | 6.0932509767  |
| NM_031203    | HNRNPM | 1208 | 1312 | 5.77132288181 |
| NM_031209    | QTRT1  | 812  | 875  | 8.36530534687 |
| NM_024945    | RMI1   | 716  | 772  | 8.44723550683 |
| NM_024945    | RMI1   | 469  | 514  | 9.95207639834 |
| NM_001024215 | FBLIM1 | 1012 | 1060 | 12.0126360271 |
| NM_001024215 | FBLIM1 | 152  | 205  | 11.4276735188 |

|              |           |      |      |               |               |
|--------------|-----------|------|------|---------------|---------------|
| NM_001024215 | FBLIM1    | 594  | 632  | 11.343534317  |               |
| NM_001024215 | FBLIM1    | 743  | 807  | 12.4276735264 |               |
| NM_001193489 | SECISBP2L |      | 2023 | 2076          | 5.58734673961 |
| NM_001193489 | SECISBP2L |      | 3687 | 3785          | 6.58734673961 |
| NM_020967    | NCOA5     | 702  | 779  | 7.71489049497 |               |
| NM_020967    | NCOA5     | 2479 | 2514 | 6.63075801664 |               |
| NM_020967    | NCOA5     | 2012 | 2065 | 5.71087962585 |               |
| NM_020967    | NCOA5     | 379  | 458  | 8.03682531336 |               |
| NM_020967    | NCOA5     | 2668 | 2713 | 6.71489049497 |               |
| NM_020967    | NCOA5     | 1012 | 1090 | 5.7148972258  |               |
| NM_020967    | NCOA5     | 2714 | 2882 | 7.71489722602 |               |
| NM_001193483 | LIMS1     | 493  | 547  | 7.31242435208 |               |
| NM_001193483 | LIMS1     | 1099 | 1189 | 6.72746858241 |               |
| NM_001193483 | LIMS1     | 1018 | 1081 | 7.72746858241 |               |
| NM_001193483 | LIMS1     | 397  | 469  | 7.31243108313 |               |
| NM_025141    | TM2D3     | 458  | 530  | 6.93091819872 |               |
| NM_025141    | TM2D3     | 70   | 139  | 6.51588069922 |               |
| NM_025141    | TM2D3     | 892  | 976  | 4.92690059855 |               |
| NM_025141    | TM2D3     | 1077 | 1135 | 7.25284629339 |               |
| NM_025141    | TM2D3     | 597  | 635  | 6.9309179628  |               |
| NM_025141    | TM2D3     | 142  | 228  | 7.25284629361 |               |
| NM_025141    | TM2D3     | 726  | 766  | 4.84677898934 |               |
| NM_025141    | TM2D3     | 235  | 400  | 8.25284629361 |               |
| NM_001042371 | PGP       | 1829 | 1894 | 10.2076323383 |               |
| NM_001145255 | IKBKG     | 1530 | 1557 | 6.14229146717 |               |
| NM_001145255 | IKBKG     | 399  | 469  | 6.14630233629 |               |
| NM_001145255 | IKBKG     | 1575 | 1682 | 7.9536639894  |               |
| NM_001099670 | C8orf59   | 528  | 562  | 5.87555764874 |               |
| NM_025140    | CCDC92    | 1249 | 1403 | 6.79862729343 |               |
| NM_025140    | CCDC92    | 336  | 421  | 5.21366479249 |               |
| NM_003568    | ANXA9     | 1357 | 1398 | 8.47494588134 |               |
| NM_003568    | ANXA9     | 834  | 893  | 8.9757694086  |               |
| NM_003568    | ANXA9     | 638  | 699  | 8.9757694086  |               |
| NM_003568    | ANXA9     | 356  | 398  | 7.47477236694 |               |
| NM_003568    | ANXA9     | 1527 | 1573 | 7.47092851709 |               |
| NM_003568    | ANXA9     | 405  | 467  | 7.47493938621 |               |
| NM_003568    | ANXA9     | 726  | 800  | 8.47494588134 |               |
| NM_001099678 | LRR58     | 1713 | 1795 | 8.34078034262 |               |
| NM_001099678 | LRR58     | 2232 | 2307 | 7.34061332335 |               |
| NM_001099678 | LRR58     | 3915 | 3975 | 8.92574957439 |               |
| NM_001099678 | LRR58     | 642  | 685  | 7.34078034262 |               |
| NM_001099678 | LRR58     | 3571 | 3652 | 8.34078034262 |               |
| NM_001099678 | LRR58     | 4258 | 4330 | 9.34061332335 |               |
| NM_001099678 | LRR58     | 5833 | 5892 | 7.3367694735  |               |
| NM_001099678 | LRR58     | 2021 | 2072 | 9.34078034262 |               |
| NM_001099678 | LRR58     | 7283 | 7339 | 8.3367694735  |               |
| NM_001099678 | LRR58     | 3792 | 3828 | 7.25664786429 |               |
| NM_001099678 | LRR58     | 1000 | 1072 | 9.66271516833 |               |
| NM_001099678 | LRR58     | 528  | 625  | 9.34078707367 |               |
| NM_001099678 | LRR58     | 6813 | 6898 | 8.92574957417 |               |



|              |           |      |      |               |               |
|--------------|-----------|------|------|---------------|---------------|
| NM_001099678 | LRR58     | 827  | 928  | 8.34078707367 |               |
| NM_001099678 | LRR58     | 7211 | 7282 | 8.3367694735  |               |
| NM_001099679 | TRIM32    | 977  | 1046 | 8.51039639219 |               |
| NM_001099679 | TRIM32    | 90   | 140  | 9.51441375644 |               |
| NM_001099679 | TRIM32    | 433  | 530  | 8.51441375644 |               |
| NM_014700    | RAB11FIP3 |      | 683  | 736           | 6.49401745792 |
| NM_014700    | RAB11FIP3 |      | 1065 | 1120          | 4.9090549572  |
| NM_014700    | RAB11FIP3 |      | 1288 | 1399          | 6.49419120823 |
| NM_014700    | RAB11FIP3 |      | 3894 | 3948          | 5.82508949813 |
| NM_014705    | DOCK4     | 792  | 852  | 7.81545885098 |               |
| NM_014705    | DOCK4     | 3825 | 3862 | 6.23049635026 |               |
| NM_014705    | DOCK4     | 589  | 655  | 7.8154590869  |               |
| NM_014705    | DOCK4     | 3219 | 3286 | 6.23049658617 |               |
| NM_014705    | DOCK4     | 3873 | 3937 | 6.226478986   |               |
| NM_014705    | DOCK4     | 2746 | 2827 | 7.81545907935 |               |
| NM_014705    | DOCK4     | 3741 | 3787 | 6.23032283586 |               |
| NM_014705    | DOCK4     | 2527 | 2587 | 6.226478986   |               |
| NM_014705    | DOCK4     | 3146 | 3191 | 6.23032283586 |               |
| NM_014705    | DOCK4     | 158  | 218  | 7.81528533658 |               |
| NM_014705    | DOCK4     | 1973 | 2042 | 6.23048985512 |               |
| NM_014705    | DOCK4     | 2396 | 2451 | 7.81545885098 |               |
| NM_014705    | DOCK4     | 727  | 787  | 6.23049658617 |               |
| NM_014705    | DOCK4     | 1727 | 1849 | 8.23049658618 |               |
| NM_014705    | DOCK4     | 363  | 406  | 7.81545908668 |               |
| NM_014705    | DOCK4     | 1110 | 1196 | 6.23048985512 |               |
| NM_014704    | CEP104    | 632  | 674  | 6.36097030737 |               |
| NM_014704    | CEP104    | 5832 | 5930 | 6.36498790754 |               |
| NM_014706    | SART3     | 1640 | 1728 | 7.16571141451 |               |
| NM_014706    | SART3     | 2807 | 2865 | 4.27421728307 |               |
| NM_014706    | SART3     | 808  | 924  | 6.35835649245 |               |
| NM_014706    | SART3     | 2498 | 2587 | 5.3583497614  |               |
| NM_014706    | SART3     | 1349 | 1471 | 6.35835649245 |               |
| NM_014706    | SART3     | 1149 | 1240 | 5.3583497614  |               |
| NM_014706    | SART3     | 512  | 616  | 5.94331899317 |               |
| NM_014706    | SART3     | 1053 | 1146 | 4.3583564849  |               |
| NM_005981    | TSPAN31   | 315  | 356  | 10.8192466254 |               |
| NM_005981    | TSPAN31   | 410  | 445  | 8.49347468062 |               |
| NM_005981    | TSPAN31   | 653  | 818  | 11.6674172822 |               |
| NM_005981    | TSPAN31   | 478  | 636  | 10.8194203757 |               |
| NM_014708    | KNTC1     | 2116 | 2169 | 8.3058249534  |               |
| NM_014708    | KNTC1     | 3902 | 3955 | 7.71701860282 |               |
| NM_014708    | KNTC1     | 4769 | 4802 | 6.63689699361 |               |
| NM_014708    | KNTC1     | 5506 | 5559 | 6.72103596708 |               |
| NM_014708    | KNTC1     | 6357 | 6404 | 6.63689699361 |               |
| NM_014708    | KNTC1     | 3609 | 3716 | 8.30599870372 |               |
| NM_014254    | TMEM5     | 619  | 666  | 9.17719883532 |               |
| NM_014254    | TMEM5     | 312  | 396  | 7.5922363346  |               |
| NM_014254    | TMEM5     | 132  | 188  | 7.51211472539 |               |
| NM_014254    | TMEM5     | 992  | 1112 | 9.91818202966 |               |
| NM_014254    | TMEM5     | 811  | 897  | 9.18121643549 |               |

|              |          |      |      |               |               |
|--------------|----------|------|------|---------------|---------------|
| NM_014254    | TMEM5    | 1206 | 1322 | 9.59625393477 |               |
| NM_005984    | SLC25A1  | 1341 | 1410 | 7.00749272383 |               |
| NM_005984    | SLC25A1  | 1199 | 1307 | 8.59245522455 |               |
| NM_005984    | SLC25A1  | 283  | 372  | 7.00749272383 |               |
| NM_005984    | SLC25A1  | 1595 | 1672 | 4.42253021556 |               |
| NM_005984    | SLC25A1  | 1517 | 1558 | 4.33839101373 |               |
| NM_005984    | SLC25A1  | 623  | 808  | 7.22988514517 |               |
| NM_005984    | SLC25A1  | 809  | 1157 | 8.744458318   |               |
| NM_005984    | SLC25A1  | 418  | 564  | 7.42253022311 |               |
| NM_014251    | SLC25A13 |      | 2411 | 2445          | 4.46350693192 |
| NM_014251    | SLC25A13 |      | 2236 | 2336          | 4.46368068223 |
| NM_014251    | SLC25A13 |      | 1570 | 1636          | 5.46368068223 |
| NM_014251    | SLC25A13 |      | 2801 | 2847          | 4.45966308206 |
| NM_014251    | SLC25A13 |      | 651  | 743           | 6.78560877712 |
| NM_014251    | SLC25A13 |      | 405  | 493           | 8.37057127784 |
| NM_014251    | SLC25A13 |      | 1657 | 1709          | 4.37954147285 |
| NM_014251    | SLC25A13 |      | 494  | 543           | 5.46368067469 |
| NM_014251    | SLC25A13 |      | 1523 | 1566          | 6.04864318295 |
| NM_014251    | SLC25A13 |      | 1160 | 1321          | 7.92311230087 |
| NM_014251    | SLC25A13 |      | 207  | 402           | 8.04864318296 |
| NM_014251    | SLC25A13 |      | 561  | 650           | 6.04864318296 |
| NM_014251    | SLC25A13 |      | 2850 | 2993          | 4.46368068223 |
| NM_014251    | SLC25A13 |      | 2061 | 2173          | 5.46368068223 |
| NM_014251    | SLC25A13 |      | 1831 | 2045          | 7.78560877712 |
| NM_014251    | SLC25A13 |      | 761  | 1112          | 8.16412040038 |
| NM_014251    | SLC25A13 |      | 1332 | 1519          | 7.27103560429 |
| NM_001202859 | SHC1     | 1153 | 1227 | 7.77106556525 |               |
| NM_001202859 | SHC1     | 1505 | 1560 | 8.3560280733  |               |
| NM_001202859 | SHC1     | 1059 | 1128 | 8.7710655728  |               |
| NM_001202859 | SHC1     | 1728 | 1818 | 9.09299366769 |               |
| NM_001202859 | SHC1     | 2046 | 2162 | 8.7710655728  |               |
| NM_001202859 | SHC1     | 1602 | 1691 | 7.7710655728  |               |
| NM_001202859 | SHC1     | 392  | 431  | 7.68692636342 |               |
| NM_001202859 | SHC1     | 2541 | 2625 | 6.7710655728  |               |
| NM_001202859 | SHC1     | 890  | 990  | 6.7710655728  |               |
| NM_001202859 | SHC1     | 267  | 335  | 7.68692636342 |               |
| NM_001202855 | CYP3A4   | 1210 | 1234 | 11.5748836321 |               |
| NM_015254    | KIF13B   | 7248 | 7308 | 7.55669616728 |               |
| NM_015254    | KIF13B   | 831  | 878  | 5.96772279744 |               |
| NM_015254    | KIF13B   | 92   | 161  | 7.97174039006 |               |
| NM_015254    | KIF13B   | 2296 | 2380 | 6.96772279744 |               |
| NM_015254    | KIF13B   | 8322 | 8369 | 5.9715666473  |               |
| NM_015254    | KIF13B   | 8397 | 8446 | 5.97173366656 |               |
| NM_015254    | KIF13B   | 3922 | 3974 | 7.9717401617  |               |
| NM_015254    | KIF13B   | 8226 | 8272 | 5.96772279744 |               |
| NM_015254    | KIF13B   | 3665 | 3710 | 6.97173366656 |               |
| NM_015254    | KIF13B   | 6484 | 6567 | 7.97174039761 |               |
| NM_015254    | KIF13B   | 217  | 269  | 5.9717401617  |               |
| NM_015254    | KIF13B   | 342  | 381  | 5.88760118823 |               |
| NM_015254    | KIF13B   | 1406 | 1453 | 7.55652914802 |               |

|              |         |      |      |               |
|--------------|---------|------|------|---------------|
| NM_015254    | KIF13B  | 395  | 464  | 6.9717401617  |
| NM_015254    | KIF13B  | 8618 | 8670 | 7.55652914802 |
| NM_015254    | KIF13B  | 7503 | 7561 | 5.97174039739 |
| NM_015254    | KIF13B  | 3154 | 3238 | 7.97174039739 |
| NM_001177519 | MICA    | 942  | 1019 | 8.03375055425 |
| NM_001177519 | MICA    | 537  | 598  | 7.44878828945 |
| NM_001177519 | MICA    | 615  | 649  | 7.44861453913 |
| NM_001177519 | MICA    | 153  | 231  | 9.44878828945 |
| NM_001177519 | MICA    | 1048 | 1196 | 10.3556788851 |
| NM_001177519 | MICA    | 297  | 457  | 9.03375079017 |
| NM_001177519 | MICA    | 724  | 826  | 7.44878828945 |
| NM_018370    | DRAM1   | 1440 | 1490 | 7.37094693969 |
| NM_018370    | DRAM1   | 1043 | 1122 | 9.69689263475 |
| NM_018370    | DRAM1   | 1226 | 1269 | 7.37495780881 |
| NM_018370    | DRAM1   | 742  | 837  | 8.95992704058 |
| NM_018370    | DRAM1   | 526  | 571  | 8.37496430394 |
| NM_018370    | DRAM1   | 588  | 666  | 9.37495780881 |
| NM_015251    | ATMIN   | 1294 | 1382 | 6.77156858137 |
| NM_015251    | ATMIN   | 1201 | 1282 | 4.18258848047 |
| NM_015253    | WSCD1   | 763  | 838  | 12.8544807454 |
| NM_006083    | IK      | 195  | 266  | 5.21077135811 |
| NM_006083    | IK      | 1271 | 1312 | 3.20675375793 |
| NM_006083    | IK      | 594  | 673  | 4.21076462705 |
| NM_006083    | IK      | 1015 | 1062 | 4.20675375793 |
| NM_006083    | IK      | 397  | 470  | 4.21077135811 |
| NM_006083    | IK      | 1338 | 1378 | 4.79171625866 |
| NM_006083    | IK      | 1658 | 1768 | 4.21077135811 |
| NM_019027    | RBM47   | 548  | 608  | 10.7208219537 |
| NM_019027    | RBM47   | 953  | 1009 | 10.3988938588 |
| NM_019027    | RBM47   | 2635 | 2695 | 8.39889385885 |
| NM_019027    | RBM47   | 2455 | 2554 | 10.3988938588 |
| NM_019027    | RBM47   | 489  | 544  | 9.39872010853 |
| NM_019027    | RBM47   | 1809 | 1922 | 8.39889385885 |
| NM_019027    | RBM47   | 119  | 295  | 12.099333577  |
| NM_019027    | RBM47   | 638  | 708  | 8.39889362293 |
| NM_019026    | TMC01   | 1351 | 1417 | 3.34331374312 |
| NM_019026    | TMC01   | 681  | 823  | 6.08027933751 |
| NM_019026    | TMC01   | 1420 | 1464 | 1.75834451157 |
| NM_019026    | TMC01   | 998  | 1150 | 5.45879096076 |
| NM_019026    | TMC01   | 43   | 238  | 6.56570616468 |
| NM_019026    | TMC01   | 242  | 681  | 7.68908858019 |
| NM_019026    | TMC01   | 868  | 993  | 4.08027933751 |
| NM_019026    | TMC01   | 1198 | 1346 | 3.75835124262 |
| NM_019024    | HEATR5B | 4559 | 4605 | 7.99076407191 |
| NM_019024    | HEATR5B | 4237 | 4287 | 7.99076407191 |
| NM_019024    | HEATR5B | 3574 | 3636 | 7.99076407191 |
| NM_019024    | HEATR5B | 2436 | 2475 | 9.57572657263 |
| NM_019024    | HEATR5B | 1778 | 1816 | 7.9106424627  |
| NM_019024    | HEATR5B | 1542 | 1571 | 8.99076407191 |
| NM_019024    | HEATR5B | 4625 | 4695 | 8.99478143616 |

|              |         |       |       |               |
|--------------|---------|-------|-------|---------------|
| NM_019024    | HEATR5B | 2179  | 2284  | 7.99478167208 |
| NM_019022    | TMX3    | 4567  | 4634  | 4.99852348791 |
| NM_019022    | TMX3    | 517   | 572   | 5.99451261879 |
| NM_019022    | TMX3    | 1477  | 1531  | 5.99451261879 |
| NM_019022    | TMX3    | 2868  | 2944  | 5.99835646865 |
| NM_019022    | TMX3    | 324   | 387   | 4.99835646865 |
| NM_019022    | TMX3    | 253   | 301   | 5.99451261879 |
| NM_019022    | TMX3    | 113   | 165   | 5.91439100958 |
| NM_019022    | TMX3    | 635   | 673   | 6.4993535103  |
| NM_019022    | TMX3    | 791   | 892   | 7.58349271968 |
| NM_019022    | TMX3    | 1151  | 1228  | 5.99852348791 |
| NM_019020    | TBC1D16 | 10598 | 10651 | 7.66219965858 |
| NM_019020    | TBC1D16 | 4276  | 4328  | 6.74633886041 |
| NM_019020    | TBC1D16 | 8465  | 8530  | 8.33130136846 |
| NM_019020    | TBC1D16 | 1126  | 1190  | 7.74616511764 |
| NM_019020    | TBC1D16 | 9068  | 9151  | 6.74616511764 |
| NM_019020    | TBC1D16 | 4855  | 4930  | 7.74633213691 |
| NM_019020    | TBC1D16 | 125   | 196   | 9.06826696284 |
| NM_019020    | TBC1D16 | 3913  | 4022  | 8.74633886796 |
| NM_019020    | TBC1D16 | 1578  | 1621  | 7.74232126779 |
| NM_019020    | TBC1D16 | 1659  | 1713  | 6.74633863204 |
| NM_019020    | TBC1D16 | 7536  | 7669  | 9.06826696285 |
| NM_019020    | TBC1D16 | 1722  | 1873  | 8.33130136868 |
| NM_019020    | TBC1D16 | 3321  | 3453  | 8.33130136868 |
| NM_019020    | TBC1D16 | 3580  | 3673  | 8.74633886796 |
| NM_019020    | TBC1D16 | 2773  | 2895  | 7.74616511764 |
| NM_003565    | ULK1    | 754   | 814   | 7.84409887195 |
| NM_003565    | ULK1    | 1028  | 1095  | 7.92422048116 |
| NM_019028    | ZDHHC13 | 1526  | 1574  | 9.4403013117  |
| NM_019028    | ZDHHC13 | 1664  | 1705  | 10.4443189117 |
| NM_019028    | ZDHHC13 | 1608  | 1660  | 10.4443121808 |
| NM_019028    | ZDHHC13 | 1827  | 1872  | 9.36017970249 |
| NM_019028    | ZDHHC13 | 1338  | 1381  | 9.36017970249 |
| NM_019028    | ZDHHC13 | 1435  | 1509  | 11.0292814126 |
| NM_019028    | ZDHHC13 | 983   | 1125  | 10.7662470068 |
| NM_005180    | BMI1    | 1612  | 1679  | 7.59983474738 |
| NM_005180    | BMI1    | 588   | 659   | 7.01487201828 |
| NM_005180    | BMI1    | 518   | 585   | 7.0148722542  |
| NM_005180    | BMI1    | 2816  | 2860  | 5.93073304482 |
| NM_005180    | BMI1    | 2109  | 2144  | 5.93073304482 |
| NM_005180    | BMI1    | 405   | 494   | 8.82222717626 |
| NM_005180    | BMI1    | 1203  | 1271  | 7.01487224665 |
| NM_005180    | BMI1    | 1990  | 2094  | 8.0148722542  |
| NM_052987    | CDK10   | 1474  | 1521  | 11.6924199518 |
| NM_052987    | CDK10   | 1295  | 1333  | 11.6924199518 |
| NM_052987    | CDK10   | 181   | 231   | 10.7765591609 |
| NM_052987    | CDK10   | 1556  | 1612  | 12.7765591536 |
| NM_052987    | CDK10   | 1043  | 1120  | 11.7765591612 |
| NM_052987    | CDK10   | 731   | 811   | 12.3615216619 |
| NM_001114382 | TSC2    | 3161  | 3212  | 6.79683183013 |

|              |        |      |      |                 |
|--------------|--------|------|------|-----------------|
| NM_001114382 | TSC2   | 756  | 834  | 7.71286637106   |
| NM_001114382 | TSC2   | 1191 | 1294 | 6.79699884939   |
| NM_001114382 | TSC2   | 3927 | 3980 | 6.71286637106   |
| NM_001114382 | TSC2   | 657  | 744  | 6.79700558022   |
| NM_001204103 | PPT2   | 1018 | 1066 | 8.60522251308   |
| NM_001204103 | PPT2   | 1128 | 1208 | 10.9271506155   |
| NM_001204103 | PPT2   | 1424 | 1506 | 8.60522251308   |
| NM_001204103 | PPT2   | 820  | 866  | 8.60504877031   |
| NM_001204103 | PPT2   | 508  | 549  | 10.6052225131   |
| NM_001204103 | PPT2   | 1267 | 1316 | 11.1901850213   |
| NM_001204103 | PPT2   | 552  | 610  | 8.52108331125   |
| NM_001204103 | PPT2   | 262  | 373  | 11.1901850214   |
| NM_001204103 | PPT2   | 120  | 172  | 8.60120492046   |
| NM_001204103 | PPT2   | 873  | 1013 | 10.1901850214   |
| NM_005189    | CBX2   | 3068 | 3141 | 6.68878767153   |
| NM_152240    | ZMAT3  | 566  | 649  | 6.48378567568   |
| NM_152240    | ZMAT3  | 1254 | 1318 | 6.48361216128   |
| NM_001204450 | CCPG1  | 364  | 415  | 6.4094899268    |
| NM_001204450 | CCPG1  | 318  | 363  | 7.73141825761   |
| NM_001204450 | CCPG1  | 1269 | 1342 | 5.40949016272   |
| NM_001204450 | CCPG1  | 1400 | 1515 | 6.99445266344   |
| NM_001204450 | CCPG1  | 1919 | 2002 | 6.99445266322   |
| NM_001204450 | CCPG1  | 492  | 633  | 8.40949016272   |
| NM_001204450 | CCPG1  | 1752 | 1866 | 6.40949016272   |
| NM_001204450 | CCPG1  | 3178 | 3248 | 5.40547256255   |
| NM_001204450 | CCPG1  | 694  | 974  | 9.73141825761   |
| NM_001204450 | CCPG1  | 2236 | 2589 | 9.8018075855    |
| NM_001204450 | CCPG1  | 1518 | 1711 | 9.31638075833   |
| NM_001204450 | CCPG1  | 2074 | 2224 | 7.73141825761   |
| NM_001204450 | CCPG1  | 1009 | 1214 | 7.99445266344   |
| NM_006086    | TUBB3  | 700  | 763  | 6.0016356772    |
| NM_006086    | TUBB3  | 1316 | 1378 | 6.58659817815   |
| NM_006086    | TUBB3  | 1000 | 1030 | 5.00146192711   |
| NM_006086    | TUBB3  | 501  | 532  | 4.99761807725   |
| NM_006086    | TUBB3  | 1612 | 1687 | 5.91749646804   |
| NM_001204456 | RBAK   | 2164 | 2250 | 7.27519718724   |
| NM_001204456 | RBAK   | 4460 | 4535 | 7.35932966557   |
| NM_001206801 | RFC5   | 413  | 461  | 7.609280425     |
| NM_001206801 | RFC5   | 633  | 736  | 8.19424942086   |
| NM_053050    | MRPL53 | 292  | 359  | 6.15570672766   |
| NM_053051    | CNTR0B | 2845 | 2888 | 7.49625981307   |
| NM_053051    | CNTR0B | 1296 | 1411 | 7.5803990149    |
| NM_053051    | CNTR0B | 3119 | 3184 | 6.57638142228   |
| NM_053052    | SNAP47 | 1442 | 1493 | 7.35578568416   |
| NM_053053    | TADA1  | 688  | 730  | 7.3445120415    |
| NM_053053    | TADA1  | 1065 | 1118 | 8.93348541134   |
| NM_053055    | THEM4  | 1433 | 1483 | 8.1330079363    |
| NM_053056    | CCND1  | 1231 | 1288 | 5.93888849356   |
| NM_001077442 | HNRNPC | 1682 | 1773 | 1.94875585798   |
| NM_001077442 | HNRNPC | 1515 | 1567 | -0.305308352844 |

|              |        |      |      |                 |
|--------------|--------|------|------|-----------------|
| NM_001077442 | HNRNPC | 1160 | 1198 | -0.225186743633 |
| NM_001077442 | HNRNPC | 1470 | 1506 | -0.225186743633 |
| NM_001077442 | HNRNPC | 1627 | 1663 | -0.221175874514 |
| NM_001077442 | HNRNPC | 52   | 713  | 5.45125619851   |
| NM_001077442 | HNRNPC | 2967 | 3017 | -1.30530835284  |
| NM_001077442 | HNRNPC | 1202 | 1451 | 4.27068395287   |
| NM_001077442 | HNRNPC | 721  | 1153 | 3.36379335726   |
| NM_001077442 | HNRNPC | 2244 | 2374 | 0.778830856534  |
| NM_001077445 | PHF16  | 356  | 400  | 6.9665843871    |
| NM_013293    | TRA2A  | 1062 | 1180 | 5.74105974154   |
| NM_013293    | TRA2A  | 1396 | 1445 | 5.74105974131   |
| NM_013293    | TRA2A  | 908  | 985  | 6.15609724082   |
| NM_013293    | TRA2A  | 173  | 260  | 5.1559234905    |
| NM_013293    | TRA2A  | 380  | 501  | 6.96345216287   |
| NM_013293    | TRA2A  | 68   | 140  | 6.1560970049    |
| NM_013293    | TRA2A  | 649  | 795  | 6.74105974154   |
| NM_016106    | SCFD1  | 276  | 350  | 4.99947098659   |
| NM_016106    | SCFD1  | 1235 | 1329 | 3.41049089325   |
| NM_016106    | SCFD1  | 1374 | 1450 | 4.99929724382   |
| NM_006989    | RASA4  | 4557 | 4635 | 7.63557834569   |
| NM_006989    | RASA4  | 1003 | 1122 | 8.63540459537   |
| NM_006989    | RASA4  | 901  | 1001 | 7.63557833814   |
| NM_001135944 | MADD   | 5035 | 5088 | 7.6807194389    |
| NM_001135944 | MADD   | 4736 | 4775 | 6.01179147911   |
| NM_001135944 | MADD   | 5146 | 5198 | 6.09191308832   |
| NM_001135944 | MADD   | 4240 | 4290 | 7.09191308832   |
| NM_001135944 | MADD   | 2017 | 2090 | 7.59675397983   |
| NM_001135944 | MADD   | 318  | 383  | 6.09191308832   |
| NM_001135944 | MADD   | 143  | 203  | 6.09593045258   |
| NM_001135944 | MADD   | 4878 | 4949 | 7.09592395744   |
| NM_001135944 | MADD   | 945  | 1045 | 6.09593045258   |
| NM_001135944 | MADD   | 798  | 877  | 6.09191308832   |
| NM_006985    | NPIP   | 659  | 712  | 0.580622136369  |
| NM_006985    | NPIP   | 740  | 797  | 0.580622136363  |
| NM_006985    | NPIP   | 807  | 867  | 1.58062213636   |
| NM_006985    | NPIP   | 881  | 994  | 1.58062213637   |
| NM_006985    | NPIP   | 397  | 540  | 0.580622136369  |
| NM_006985    | NPIP   | 0    | 344  | 5.16558463709   |
| NM_006986    | MAGED1 | 2476 | 2583 | 6.10356961993   |
| NM_006986    | MAGED1 | 2145 | 2242 | 6.95156652648   |
| NM_006986    | MAGED1 | 2095 | 2140 | 4.77762392487   |
| NM_006986    | MAGED1 | 789  | 863  | 4.78164152504   |
| NM_006986    | MAGED1 | 1004 | 1060 | 3.78163479399   |
| NM_006986    | MAGED1 | 183  | 251  | 5.36659729471   |
| NM_006986    | MAGED1 | 2656 | 2724 | 5.36660402576   |
| NM_006986    | MAGED1 | 2606 | 2646 | 5.78146777472   |
| NM_006986    | MAGED1 | 289  | 327  | 3.77762392487   |
| NM_006986    | MAGED1 | 1674 | 1816 | 6.78164152504   |
| NM_006986    | MAGED1 | 1190 | 1252 | 3.77762392487   |
| NM_006986    | MAGED1 | 2244 | 2373 | 7.36660402576   |

|           |         |      |      |               |
|-----------|---------|------|------|---------------|
| NM_006986 | MAGED1  | 1377 | 1537 | 6.10356961993 |
| NM_006986 | MAGED1  | 1903 | 2087 | 6.78164152504 |
| NM_018950 | HLA-F   | 1080 | 1125 | 7.21607934564 |
| NM_018950 | HLA-F   | 759  | 825  | 7.21607934564 |
| NM_018950 | HLA-F   | 538  | 598  | 8.21607934564 |
| NM_018950 | HLA-F   | 857  | 913  | 7.21607261459 |
| NM_018955 | UBB     | 1090 | 1156 | 1.75229428273 |
| NM_018955 | UBB     | 982  | 1089 | 2.11486436211 |
| NM_018955 | UBB     | 297  | 957  | 5.23034157953 |
| NM_018957 | SH3BP1  | 322  | 386  | 8.29890415628 |
| NM_018957 | SH3BP1  | 713  | 750  | 6.71393516042 |
| NM_018957 | SH3BP1  | 1526 | 1614 | 7.71394189148 |
| NM_018957 | SH3BP1  | 2497 | 2586 | 6.71394189148 |
| NM_018957 | SH3BP1  | 1183 | 1240 | 7.71376814116 |
| NM_018957 | SH3BP1  | 1032 | 1091 | 7.71394189148 |
| NM_018957 | SH3BP1  | 539  | 583  | 6.71376814116 |
| NM_018957 | SH3BP1  | 910  | 973  | 6.71394165556 |
| NM_018957 | SH3BP1  | 831  | 907  | 6.7099242913  |
| NM_018959 | DAZAP1  | 1552 | 1624 | 6.06219006786 |
| NM_018959 | DAZAP1  | 1726 | 1776 | 4.47722756714 |
| NM_018959 | DAZAP1  | 1456 | 1521 | 4.47722756714 |
| NM_018959 | DAZAP1  | 1251 | 1307 | 5.2141931613  |
| NM_018959 | DAZAP1  | 1916 | 2062 | 6.35169668505 |
| NM_018959 | DAZAP1  | 892  | 975  | 2.89226506641 |
| NM_018959 | DAZAP1  | 1069 | 1109 | 2.80812585703 |
| NM_018959 | DAZAP1  | 230  | 337  | 5.2141931613  |
| NM_018959 | DAZAP1  | 491  | 805  | 7.2141931613  |
| NM_018959 | DAZAP1  | 1807 | 1915 | 5.2141931613  |
| NM_016551 | TM7SF3  | 1788 | 1880 | 8.57528257393 |
| NM_016551 | TM7SF3  | 1997 | 2081 | 8.57528257393 |
| NM_016551 | TM7SF3  | 992  | 1057 | 8.57528257393 |
| NM_016551 | TM7SF3  | 1696 | 1742 | 7.57528233801 |
| NM_016551 | TM7SF3  | 824  | 883  | 9.16024507465 |
| NM_016551 | TM7SF3  | 2251 | 2290 | 6.49114336455 |
| NM_016551 | TM7SF3  | 1594 | 1689 | 8.89721066882 |
| NM_016551 | TM7SF3  | 286  | 398  | 9.57528257393 |
| NM_016551 | TM7SF3  | 1128 | 1431 | 11.0347141926 |
| NM_016551 | TM7SF3  | 1432 | 1569 | 9.74520757537 |
| NM_016551 | TM7SF3  | 445  | 684  | 10.8232100874 |
| NM_016551 | TM7SF3  | 2352 | 2425 | 8.57528257393 |
| NM_016551 | TM7SF3  | 1893 | 1995 | 8.1602450671  |
| NM_016551 | TM7SF3  | 905  | 989  | 7.57528257371 |
| NM_000456 | SUOX    | 600  | 672  | 8.12956694475 |
| NM_020845 | PITPNM2 | 6587 | 6631 | 8.70489502438 |
| NM_020845 | PITPNM2 | 6192 | 6279 | 8.62477341517 |
| NM_020845 | PITPNM2 | 5571 | 5645 | 8.70873887423 |
| NM_012111 | AHSA1   | 90   | 142  | 4.68840737871 |
| NM_012111 | AHSA1   | 1301 | 1337 | 3.68438977854 |
| NM_012111 | AHSA1   | 312  | 367  | 5.27336987921 |
| NM_012111 | AHSA1   | 183  | 308  | 6.68840737872 |

|              |          |      |      |               |               |
|--------------|----------|------|------|---------------|---------------|
| NM_012111    | AHSA1    | 880  | 1022 | 6.0103354736  |               |
| NM_012111    | AHSA1    | 1209 | 1272 | 3.68840737849 |               |
| NM_012111    | AHSA1    | 371  | 609  | 7.59529797432 |               |
| NM_012111    | AHSA1    | 1024 | 1208 | 6.49576230077 |               |
| NM_020840    | FNIP2    | 2809 | 2851 | 5.01930881458 |               |
| NM_020840    | FNIP2    | 3711 | 3752 | 6.6042713153  |               |
| NM_020840    | FNIP2    | 330  | 417  | 6.02332617883 |               |
| NM_020840    | FNIP2    | 667  | 756  | 5.01930881458 |               |
| NM_020840    | FNIP2    | 3434 | 3518 | 7.01930881458 |               |
| NM_020840    | FNIP2    | 1516 | 1573 | 5.01930881458 |               |
| NM_138638    | CFL2     | 483  | 553  | 3.95785522505 |               |
| NM_138638    | CFL2     | 410  | 465  | 3.37289921947 |               |
| NM_138638    | CFL2     | 687  | 742  | 3.36888185521 |               |
| NM_022572    | PNKD     | 2571 | 2619 | 7.5362076656  |               |
| NM_022572    | PNKD     | 2769 | 2844 | 8.1251877665  |               |
| NM_022572    | PNKD     | 2846 | 2923 | 8.1251877665  |               |
| NM_022572    | PNKD     | 1028 | 1078 | 7.5362076656  |               |
| NM_022572    | PNKD     | 2513 | 2553 | 7.54021853472 |               |
| NM_022572    | PNKD     | 227  | 272  | 7.54021853472 |               |
| NM_022572    | PNKD     | 1641 | 1709 | 7.54005151546 |               |
| NM_022572    | PNKD     | 1931 | 1976 | 6.5362076656  |               |
| NM_022572    | PNKD     | 459  | 505  | 7.54022526555 |               |
| NM_022572    | PNKD     | 506  | 543  | 7.45608605639 |               |
| NM_022572    | PNKD     | 2620 | 2682 | 7.54022526555 |               |
| NM_022572    | PNKD     | 2086 | 2185 | 8.54022526578 |               |
| NM_022572    | PNKD     | 764  | 912  | 8.86215336066 |               |
| NM_001143964 | TBC1D7   | 704  | 757  | 7.86463239551 |               |
| NM_001143964 | TBC1D7   | 366  | 445  | 7.27966989478 |               |
| NM_001143964 | TBC1D7   | 267  | 331  | 7.27966989478 |               |
| NM_016623    | FAM49B   | 1807 | 1893 | 6.75785114793 |               |
| NM_016623    | FAM49B   | 706  | 763  | 6.43592305303 |               |
| NM_016623    | FAM49B   | 261  | 309  | 4.43190545287 |               |
| NM_016623    | FAM49B   | 1647 | 1696 | 6.02088555375 |               |
| NM_016623    | FAM49B   | 1280 | 1371 | 6.43592305304 |               |
| NM_016623    | FAM49B   | 579  | 643  | 4.43190545287 |               |
| NM_016623    | FAM49B   | 1383 | 1498 | 7.75785114793 |               |
| NM_016623    | FAM49B   | 1900 | 1943 | 5.43591632199 |               |
| NM_016626    | MEX3C    | 1584 | 1640 | 6.91160643696 |               |
| NM_022574    | GIGYF1   | 4373 | 4445 | 6.29274959103 |               |
| NM_022574    | GIGYF1   | 5433 | 5519 | 7.29659344089 |               |
| NM_022574    | GIGYF1   | 5590 | 5651 | 6.29676046015 |               |
| NM_001039140 | C20orf27 |      | 414  | 519           | 8.40418218154 |
| NM_001039140 | C20orf27 |      | 598  | 635           | 5.8190459305  |
| NM_001039140 | C20orf27 |      | 1057 | 1107          | 5.81520208065 |
| NM_001039140 | C20orf27 |      | 718  | 830           | 8.40418218154 |
| NM_001039140 | C20orf27 |      | 892  | 938           | 6.73508047143 |
| NM_001039140 | C20orf27 |      | 948  | 1053          | 7.40418218154 |
| NM_001039140 | C20orf27 |      | 1293 | 1363          | 7.81921968082 |
| NM_001039140 | C20orf27 |      | 150  | 249           | 7.40418218154 |
| NM_194451    | LIAS     | 160  | 210  | 6.38284073741 |               |



|              |            |      |      |                    |
|--------------|------------|------|------|--------------------|
| NM_001170766 | LCOR       | 6776 | 6832 | 7.73514977928      |
| NM_001170766 | LCOR       | 361  | 425  | 6.2343264804       |
| NM_001170766 | LCOR       | 1923 | 1981 | 7.81911523835      |
| NM_001170766 | LCOR       | 3734 | 3784 | 7.23030888777      |
| NM_001170766 | LCOR       | 7490 | 7555 | 7.2343264804       |
| NM_001170766 | LCOR       | 943  | 1041 | 7.81928898867      |
| NM_001170766 | LCOR       | 4201 | 4269 | 6.23431975689      |
| NM_001170766 | LCOR       | 2377 | 2449 | 6.23030888777      |
| NM_001170766 | LCOR       | 3073 | 3129 | 7.81911523835      |
| NM_001170766 | LCOR       | 82   | 115  | 6.15018727856      |
| NM_001170766 | LCOR       | 5680 | 5737 | 7.23431975689      |
| NM_001170766 | LCOR       | 677  | 799  | 8.55625458283      |
| NM_001170766 | LCOR       | 1811 | 1871 | 6.23431975689      |
| NM_001170766 | LCOR       | 214  | 350  | 9.55625458283      |
| NM_001170766 | LCOR       | 6318 | 6433 | 7.81928898867      |
| NM_001408    | CELSR2     | 2456 | 2503 | 11.1878937631      |
| NM_001408    | CELSR2     | 6528 | 6585 | 9.18388289401      |
| NM_001408    | CELSR2     | 2831 | 2878 | 9.18790048663      |
| NM_001408    | CELSR2     | 4245 | 4318 | 10.1037612848      |
| NM_001408    | CELSR2     | 1073 | 1147 | 9.18388289401      |
| NM_001408    | CELSR2     | 9901 | 9946 | 10.183882894       |
| NM_001408    | CELSR2     | 6329 | 6404 | 10.7688453947      |
| NM_001408    | CELSR2     | 2554 | 2624 | 9.18388289401      |
| NM_001408    | CELSR2     | 7126 | 7196 | 9.18790025826      |
| NM_001408    | CELSR2     | 5489 | 5596 | 11.5098285891      |
| NM_004169    | SHMT1      | 467  | 513  | 8.36821747059      |
| NM_004169    | SHMT1      | 259  | 296  | 7.78308121956      |
| NM_004169    | SHMT1      | 1551 | 1601 | 7.7792373697       |
| NM_004169    | SHMT1      | 1951 | 2019 | 8.36804372028      |
| NM_004169    | SHMT1      | 1648 | 1696 | 8.36821723468      |
| NM_004169    | SHMT1      | 1356 | 1455 | 7.78325496988      |
| NM_004169    | SHMT1      | 1308 | 1353 | 6.78308121956      |
| NM_004169    | SHMT1      | 309  | 432  | 9.10518306476      |
| NM_004169    | SHMT1      | 100  | 206  | 6.78325496988      |
| NM_004169    | SHMT1      | 839  | 1114 | 10.6901455655      |
| NM_004169    | SHMT1      | 1727 | 1927 | 9.95317997132      |
| NM_004169    | SHMT1      | 619  | 736  | 9.78325496988      |
| NM_004169    | SHMT1      | 1127 | 1303 | 10.2426865885      |
| NM_205834    | LSR        | 805  | 865  | 7.79550082673      |
| NM_205834    | LSR        | 1680 | 1731 | 6.79532707641      |
| NM_205834    | LSR        | 1798 | 1901 | 7.79550082673      |
| NM_205834    | LSR        | 389  | 787  | 10.882963668       |
| NM_205834    | LSR        | 1269 | 1591 | 10.5503883289      |
| NM_205834    | LSR        | 1936 | 2040 | 7.79550082673      |
| NM_205834    | LSR        | 160  | 313  | 8.11742892161      |
| NM_205834    | LSR        | 2067 | 2266 | 10.2549324454      |
| NM_205834    | LSR        | 868  | 1134 | 9.96542582817      |
| NM_001198760 | LY75-CD302 |      | 5179 | 5243 9.58252548046 |
| NM_001198760 | LY75-CD302 |      | 4958 | 5020 9.57868163061 |
| NM_001198810 | SLC43A1    | 139  | 272  | 8.83925540177      |

|              |         |      |      |                |
|--------------|---------|------|------|----------------|
| NM_001198810 | SLC43A1 | 452  | 583  | 8.47668532238  |
| NM_001198810 | SLC43A1 | 2079 | 2119 | 7.17015369166  |
| NM_001198810 | SLC43A1 | 1322 | 1365 | 5.66933039278  |
| NM_001198810 | SLC43A1 | 308  | 360  | 6.66933039278  |
| NM_001198810 | SLC43A1 | 1889 | 1984 | 5.66933040033  |
| NM_001198810 | SLC43A1 | 1438 | 1572 | 8.25429290105  |
| NM_001198810 | SLC43A1 | 1747 | 1846 | 7.99125849521  |
| NM_001198810 | SLC43A1 | 1598 | 1711 | 8.99125849521  |
| NM_001198810 | SLC43A1 | 799  | 1304 | 9.83925540177  |
| NM_001198810 | SLC43A1 | 686  | 788  | 9.12876201896  |
| NM_004161    | RAB1A   | 1418 | 1486 | 1.81290346642  |
| NM_004161    | RAB1A   | 509  | 609  | 2.81290346642  |
| NM_004161    | RAB1A   | 647  | 774  | 2.2279409657   |
| NM_004161    | RAB1A   | 843  | 990  | 1.81290346642  |
| NM_004161    | RAB1A   | 1007 | 1099 | 3.03529588776  |
| NM_004161    | RAB1A   | 1151 | 1313 | 3.03529588776  |
| NM_004161    | RAB1A   | 209  | 345  | 2.2279409657   |
| NM_004161    | RAB1A   | 422  | 495  | 1.22794072978  |
| NM_004161    | RAB1A   | 1493 | 1585 | 1.2279409657   |
| NM_001402    | EEF1A1  | 2384 | 2481 | -2.47566189576 |
| NM_001402    | EEF1A1  | 1836 | 1871 | -3.47967926002 |
| NM_001402    | EEF1A1  | 3    | 1741 | 5.20381843966  |
| NM_001402    | EEF1A1  | 2099 | 2199 | -3.47566165985 |
| NM_001404    | EEF1G   | 800  | 861  | 0.457141552637 |
| NM_001404    | EEF1G   | 1255 | 1299 | 2.77906964752  |
| NM_001404    | EEF1G   | 861  | 1243 | 6.1850620072   |
| NM_001404    | EEF1G   | 1300 | 1535 | 4.62706655408  |
| NM_001404    | EEF1G   | 497  | 797  | 5.77906964752  |
| NM_001404    | EEF1G   | 126  | 489  | 5.58642456958  |
| NM_001405    | EFNA2   | 968  | 1065 | 10.8398201741  |
| NM_001405    | EFNA2   | 888  | 957  | 10.2548576734  |
| NM_001405    | EFNA2   | 2079 | 2138 | 10.2548576732  |
| NM_001405    | EFNA2   | 618  | 655  | 9.17071846402  |
| NM_001405    | EFNA2   | 1892 | 1933 | 11.2546839231  |
| NM_001405    | EFNA2   | 188  | 255  | 9.25485743748  |
| NM_001405    | EFNA2   | 1202 | 1281 | 10.8398201741  |
| NM_001405    | EFNA2   | 475  | 559  | 9.2548576734   |
| NM_001405    | EFNA2   | 1118 | 1197 | 11.2548576734  |
| NM_001407    | CELSR3  | 3580 | 3625 | 9.6446256035   |
| NM_001407    | CELSR3  | 5150 | 5216 | 8.6446256035   |
| NM_001407    | CELSR3  | 3795 | 3857 | 10.2255772351  |
| NM_007124    | UTRN    | 3866 | 3939 | 4.18931432407  |
| NM_007124    | UTRN    | 5750 | 5824 | 4.60435182312  |
| NM_007124    | UTRN    | 4835 | 4874 | 4.60033422317  |
| NM_007124    | UTRN    | 5145 | 5203 | 2.60435182312  |
| NM_007124    | UTRN    | 6491 | 6532 | 3.60033422317  |
| NM_007124    | UTRN    | 1031 | 1073 | 2.6043518158   |
| NM_007124    | UTRN    | 5379 | 5446 | 4.18931432384  |
| NM_007124    | UTRN    | 8235 | 8299 | 4.18931408815  |
| NM_007124    | UTRN    | 5055 | 5096 | 3.52021261396  |

|           |      |       |       |               |
|-----------|------|-------|-------|---------------|
| NM_007124 | UTRN | 9464  | 9546  | 3.60435182334 |
| NM_007124 | UTRN | 3558  | 3606  | 2.60417807303 |
| NM_007124 | UTRN | 7778  | 7841  | 2.6043518158  |
| NM_007124 | UTRN | 8807  | 8855  | 4.18930759301 |
| NM_007124 | UTRN | 6854  | 6927  | 2.52021261396 |
| NM_007124 | UTRN | 7596  | 7682  | 2.60435158743 |
| NM_007124 | UTRN | 3771  | 3853  | 4.60435182334 |
| NM_007124 | UTRN | 9906  | 9944  | 2.52021261396 |
| NM_007124 | UTRN | 8914  | 8977  | 4.18931432407 |
| NM_007124 | UTRN | 2712  | 2795  | 4.18914057375 |
| NM_007124 | UTRN | 6714  | 6795  | 5.4117067454  |
| NM_007124 | UTRN | 7357  | 7405  | 2.60033422317 |
| NM_007124 | UTRN | 10049 | 10102 | 2.60417807303 |
| NM_007124 | UTRN | 2     | 94    | 3.60434509229 |
| NM_007124 | UTRN | 3437  | 3522  | 2.60434509229 |
| NM_007124 | UTRN | 1588  | 1706  | 4.18931432407 |
| NM_007124 | UTRN | 8596  | 8706  | 4.18931432407 |
| NM_007124 | UTRN | 1782  | 1889  | 4.18931432407 |
| NM_007124 | UTRN | 761   | 831   | 3.60417807303 |
| NM_007124 | UTRN | 3998  | 4056  | 2.60033422317 |
| NM_007124 | UTRN | 7050  | 7138  | 2.60435182312 |
| NM_007124 | UTRN | 3693  | 3757  | 3.60435158743 |
| NM_007124 | UTRN | 364   | 497   | 4.60435182334 |
| NM_007124 | UTRN | 4470  | 4586  | 4.18931432407 |
| NM_007124 | UTRN | 3352  | 3417  | 3.60033422317 |
| NM_007124 | UTRN | 1459  | 1544  | 2.60434509229 |
| NM_007124 | UTRN | 3240  | 3334  | 2.60434509229 |
| NM_007127 | VIL1 | 1445  | 1513  | 5.31723450866 |
| NM_007127 | VIL1 | 251   | 302   | 4.58026218344 |
| NM_007127 | VIL1 | 2099  | 2146  | 2.99530641355 |
| NM_007127 | VIL1 | 1326  | 1388  | 5.31723450866 |
| NM_007127 | VIL1 | 169   | 232   | 5.58026891449 |
| NM_007127 | VIL1 | 1209  | 1325  | 4.99530641377 |
| NM_007127 | VIL1 | 11    | 151   | 5.31723450866 |
| NM_007127 | VIL1 | 810   | 1016  | 6.99530641377 |
| NM_007127 | VIL1 | 311   | 394   | 2.99530641377 |
| NM_007127 | VIL1 | 1886  | 2099  | 6.31723450866 |
| NM_007127 | VIL1 | 397   | 757   | 7.08276925502 |
| NM_007127 | VIL1 | 2214  | 2576  | 7.80266133583 |
| NM_007127 | VIL1 | 1537  | 1636  | 4.58026891427 |
| NM_007127 | VIL1 | 1643  | 1837  | 4.58026891449 |
| NM_007126 | VCP  | 3216  | 3259  | 3.02285065068 |
| NM_007126 | VCP  | 3356  | 3435  | 3.9387114413  |
| NM_007126 | VCP  | 2825  | 2877  | 4.60781314385 |
| NM_007126 | VCP  | 838   | 940   | 7.19277565212 |
| NM_007126 | VCP  | 3467  | 3570  | 5.6078131514  |
| NM_007126 | VCP  | 1989  | 2224  | 7.54641260674 |
| NM_007126 | VCP  | 457   | 713   | 7.88083164581 |
| NM_007126 | VCP  | 1774  | 1979  | 7.34477874557 |
| NM_007126 | VCP  | 2235  | 2474  | 7.34477874557 |

|              |        |      |      |               |
|--------------|--------|------|------|---------------|
| NM_007126    | VCP    | 957  | 1279 | 8.34477874557 |
| NM_007126    | VCP    | 747  | 834  | 4.02285065068 |
| NM_007126    | VCP    | 267  | 322  | 4.60781291548 |
| NM_007126    | VCP    | 2910 | 3193 | 7.11031349193 |
| NM_007126    | VCP    | 2482 | 2824 | 7.48228226932 |
| NM_007126    | VCP    | 1321 | 1773 | 8.77773815284 |
| NM_007126    | VCP    | 138  | 231  | 5.6078131514  |
| NM_014727    | MLL4   | 5828 | 5873 | 7.17361833349 |
| NM_014727    | MLL4   | 5205 | 5281 | 8.75875458452 |
| NM_014727    | MLL4   | 7147 | 7197 | 8.16977448363 |
| NM_014727    | MLL4   | 4096 | 4195 | 8.1737920838  |
| NM_014727    | MLL4   | 4476 | 4527 | 7.08965287442 |
| NM_014727    | MLL4   | 3519 | 3567 | 8.1737920838  |
| NM_014727    | MLL4   | 2869 | 2943 | 8.17361833349 |
| NM_014727    | MLL4   | 2499 | 2551 | 7.17379208358 |
| NM_014727    | MLL4   | 3991 | 4064 | 8.75875458452 |
| NM_014727    | MLL4   | 5299 | 5374 | 8.1737920838  |
| NM_014727    | MLL4   | 3066 | 3116 | 8.17361833349 |
| NM_014727    | MLL4   | 2045 | 2096 | 7.16977448363 |
| NM_014727    | MLL4   | 5461 | 5552 | 7.17378535275 |
| NM_014727    | MLL4   | 4704 | 4872 | 9.1737920838  |
| NM_014727    | MLL4   | 5042 | 5097 | 7.17378535275 |
| NM_014727    | MLL4   | 5924 | 6035 | 8.75875458452 |
| NM_001167931 | IL1RAP | 1505 | 1584 | 7.24076551453 |
| NM_001167931 | IL1RAP | 1151 | 1265 | 8.04812043658 |
| NM_001167931 | IL1RAP | 252  | 371  | 7.56269360941 |
| NM_001167931 | IL1RAP | 874  | 988  | 8.41069051597 |
| NM_001167931 | IL1RAP | 375  | 505  | 8.41069051597 |
| NM_001167931 | IL1RAP | 697  | 861  | 8.94120523267 |
| NM_001167931 | IL1RAP | 998  | 1130 | 8.56269360941 |
| NM_001167931 | IL1RAP | 1416 | 1472 | 6.8257280077  |
| NM_003801    | GPAA1  | 1186 | 1322 | 10.8226040895 |
| NM_003801    | GPAA1  | 1893 | 2037 | 10.8226040895 |
| NM_003801    | GPAA1  | 915  | 981  | 9.2376415888  |
| NM_003801    | GPAA1  | 621  | 702  | 10.5595696837 |
| NM_003801    | GPAA1  | 181  | 243  | 8.23362398863 |
| NM_003801    | GPAA1  | 1366 | 1521 | 10.2376415888 |
| NM_003801    | GPAA1  | 301  | 425  | 11.0449965109 |
| NM_003801    | GPAA1  | 1782 | 1846 | 9.23764158125 |
| NM_003801    | GPAA1  | 543  | 619  | 9.82260408952 |
| NM_020719    | PRR12  | 525  | 584  | 9.85313035751 |
| NM_020719    | PRR12  | 419  | 464  | 9.26816112574 |
| NM_020719    | PRR12  | 3616 | 3695 | 8.26816112574 |
| NM_020719    | PRR12  | 5457 | 5512 | 9.26799410647 |
| NM_020719    | PRR12  | 5613 | 5665 | 8.26816112574 |
| NM_020719    | PRR12  | 92   | 228  | 9.26816785679 |
| NM_020719    | PRR12  | 4081 | 4183 | 8.26415025662 |
| NM_020718    | USP31  | 6832 | 6875 | 6.84473293848 |
| NM_020718    | USP31  | 8550 | 8614 | 6.84473293848 |
| NM_020718    | USP31  | 5891 | 5975 | 8.43371280346 |

|           |       |      |      |               |
|-----------|-------|------|------|---------------|
| NM_020718 | USP31 | 2958 | 3004 | 6.84473293848 |
| NM_020718 | USP31 | 8476 | 8539 | 7.84875030274 |
| NM_020718 | USP31 | 5774 | 5831 | 6.84473293848 |
| NM_020718 | USP31 | 7145 | 7198 | 6.84473293848 |
| NM_020718 | USP31 | 770  | 887  | 9.65610546071 |
| NM_020718 | USP31 | 1165 | 1222 | 6.84473293848 |
| NM_020718 | USP31 | 4500 | 4563 | 6.84875053866 |
| NM_020718 | USP31 | 902  | 1051 | 9.43371303938 |
| NM_020718 | USP31 | 4152 | 4257 | 8.84875053866 |
| NM_020718 | USP31 | 1900 | 1964 | 7.84473293848 |
| NM_033093 | TRIM5 | 797  | 853  | 7.08287000652 |
| NM_033093 | TRIM5 | 174  | 267  | 8.08304375662 |
| NM_001664 | RHOA  | 880  | 945  | 3.29218340248 |
| NM_001664 | RHOA  | 1141 | 1207 | 3.61411149736 |
| NM_001664 | RHOA  | 1673 | 1758 | 2.29218340225 |
| NM_001664 | RHOA  | 1049 | 1097 | 2.29218340248 |
| NM_001664 | RHOA  | 1447 | 1500 | 1.29217667142 |
| NM_001664 | RHOA  | 1538 | 1580 | 1.20804419309 |
| NM_001664 | RHOA  | 1263 | 1300 | 3.61393774704 |
| NM_001664 | RHOA  | 1825 | 1885 | 1.29218340225 |
| NM_001664 | RHOA  | 124  | 550  | 6.33657752183 |
| NM_001664 | RHOA  | 556  | 867  | 5.19907399808 |
| NM_001665 | RHOG  | 167  | 235  | 7.46066511608 |
| NM_001665 | RHOG  | 852  | 906  | 9.46066511608 |
| NM_001665 | RHOG  | 803  | 851  | 7.45664775183 |
| NM_001665 | RHOG  | 614  | 685  | 9.04562785271 |
| NM_001665 | RHOG  | 331  | 445  | 8.460665352   |
| NM_004295 | TRAF4 | 1024 | 1080 | 7.56412650128 |
| NM_004295 | TRAF4 | 1250 | 1306 | 6.97915726972 |
| NM_004295 | TRAF4 | 511  | 573  | 8.78651892261 |
| NM_004295 | TRAF4 | 1799 | 1839 | 8.30109209544 |
| NM_004295 | TRAF4 | 1193 | 1235 | 7.56411977045 |
| NM_004295 | TRAF4 | 433  | 498  | 7.5641265015  |
| NM_004295 | TRAF4 | 574  | 666  | 7.56412650128 |
| NM_004295 | TRAF4 | 778  | 875  | 6.97916400078 |
| NM_004295 | TRAF4 | 391  | 428  | 5.9751464006  |
| NM_004295 | TRAF4 | 1872 | 1955 | 7.5641265015  |
| NM_020710 | LRR47 | 2221 | 2285 | 6.49952605777 |
| NM_020710 | LRR47 | 1304 | 1358 | 7.41538685593 |
| NM_020710 | LRR47 | 1589 | 1635 | 8.08448856581 |
| NM_020710 | LRR47 | 1431 | 1503 | 6.499352315   |
| NM_020710 | LRR47 | 2042 | 2149 | 8.49952606532 |
| NM_020710 | LRR47 | 513  | 670  | 9.66945106676 |
| NM_020710 | LRR47 | 1855 | 1959 | 6.49952606532 |
| NM_004290 | RNF14 | 1693 | 1766 | 5.57633555897 |
| NM_001663 | ARF6  | 1207 | 1294 | 8.3121862813  |
| NM_001663 | ARF6  | 2430 | 2505 | 6.14208752954 |
| NM_001663 | ARF6  | 1521 | 1601 | 7.72722378058 |
| NM_001663 | ARF6  | 387  | 465  | 6.14226127231 |
| NM_001663 | ARF6  | 3345 | 3384 | 6.72320618041 |

|              |          |      |      |               |               |
|--------------|----------|------|------|---------------|---------------|
| NM_001663    | ARF6     | 787  | 846  | 7.14226127986 |               |
| NM_001663    | ARF6     | 1353 | 1436 | 7.14226127986 |               |
| NM_001663    | ARF6     | 139  | 188  | 5.14226127964 |               |
| NM_001663    | ARF6     | 2017 | 2064 | 5.14225454881 |               |
| NM_001663    | ARF6     | 3807 | 3913 | 6.14226127986 |               |
| NM_001663    | ARF6     | 3111 | 3174 | 5.14208752954 |               |
| NM_001663    | ARF6     | 539  | 777  | 8.3121862813  |               |
| NM_001135051 | FAM160B1 |      | 1450 | 1487          | 7.44598621918 |
| NM_001135051 | FAM160B1 |      | 2359 | 2398          | 9.0309487199  |
| NM_001135051 | FAM160B1 |      | 586  | 639           | 9.03111573916 |
| NM_001135051 | FAM160B1 |      | 2286 | 2354          | 9.44214236932 |
| NM_001135051 | FAM160B1 |      | 1798 | 1913          | 8.44615996949 |
| NM_001135055 | TKT      | 394  | 452  | 5.12157303104 |               |
| NM_001135055 | TKT      | 901  | 948  | 3.5366102944  |               |
| NM_001135055 | TKT      | 544  | 604  | 5.53661053009 |               |
| NM_001135055 | TKT      | 452  | 514  | 5.53660379926 |               |
| NM_001135055 | TKT      | 1220 | 1356 | 5.8585386252  |               |
| NM_001135055 | TKT      | 1715 | 1823 | 3.53661053032 |               |
| NM_001135055 | TKT      | 615  | 671  | 4.53259293014 |               |
| NM_001135055 | TKT      | 1612 | 1711 | 4.53661053032 |               |
| NM_001135055 | TKT      | 1948 | 2026 | 4.53661053009 |               |
| NM_001135055 | TKT      | 698  | 801  | 3.53661053009 |               |
| NM_000138    | FBN1     | 2687 | 2765 | 12.0016351587 |               |
| NM_144628    | TBC1D20  | 283  | 346  | 4.62131233889 |               |
| NM_005216    | DDOST    | 859  | 962  | 7.04732488791 |               |
| NM_005216    | DDOST    | 1817 | 1891 | 5.66881326466 |               |
| NM_005216    | DDOST    | 252  | 407  | 7.43434801102 |               |
| NM_005216    | DDOST    | 158  | 247  | 4.34688516977 |               |
| NM_005216    | DDOST    | 974  | 1259 | 8.10177267193 |               |
| NM_005216    | DDOST    | 1267 | 1674 | 8.8387382661  |               |
| NM_005216    | DDOST    | 408  | 857  | 9.04732488791 |               |
| NM_005216    | DDOST    | 1954 | 2047 | 3.34688516955 |               |
| NM_024010    | MTRR     | 165  | 224  | 5.83999943026 |               |
| NM_024010    | MTRR     | 1819 | 1908 | 7.83982591586 |               |
| NM_024010    | MTRR     | 747  | 829  | 5.83999293513 |               |
| NM_024010    | MTRR     | 443  | 550  | 7.83999966618 |               |
| NM_000130    | F5       | 8062 | 8113 | 5.9136606938  |               |
| NM_000130    | F5       | 547  | 592  | 3.32869819308 |               |
| NM_000130    | F5       | 5567 | 5618 | 4.2445589837  |               |
| NM_000130    | F5       | 5835 | 5935 | 5.32869819308 |               |
| NM_000130    | F5       | 5013 | 5094 | 5.65062628796 |               |
| NM_000130    | F5       | 5720 | 5820 | 4.91365396275 |               |
| NM_000130    | F5       | 2715 | 2781 | 3.32869819308 |               |
| NM_000130    | F5       | 1917 | 1970 | 5.65062628797 |               |
| NM_000130    | F5       | 6875 | 6942 | 3.32852444276 |               |
| NM_000130    | F5       | 3389 | 3440 | 4.82952148442 |               |
| NM_000130    | F5       | 2261 | 2324 | 4.32869819308 |               |
| NM_000130    | F5       | 6424 | 6486 | 3.32869819308 |               |
| NM_000130    | F5       | 6139 | 6175 | 3.32852444276 |               |
| NM_000130    | F5       | 1553 | 1612 | 3.32468059291 |               |

|              |          |      |      |                   |
|--------------|----------|------|------|-------------------|
| NM_000130    | F5       | 292  | 363  | 4.32869146203     |
| NM_000130    | F5       | 5314 | 5396 | 4.91366069358     |
| NM_000130    | F5       | 2968 | 3027 | 3.32869819308     |
| NM_000130    | F5       | 1006 | 1066 | 5.32869819308     |
| NM_000130    | F5       | 4478 | 4533 | 4.32869795716     |
| NM_000130    | F5       | 3161 | 3233 | 4.32869819308     |
| NM_000130    | F5       | 836  | 876  | 4.32468059291     |
| NM_000130    | F5       | 2205 | 2244 | 3.32852444276     |
| NM_000130    | F5       | 2484 | 2545 | 3.32869819308     |
| NM_000130    | F5       | 2908 | 2955 | 4.32869146203     |
| NM_000130    | F5       | 3524 | 3615 | 5.32869819286     |
| NM_000130    | F5       | 378  | 451  | 4.2445589837      |
| NM_000130    | F5       | 2326 | 2467 | 6.49862319452     |
| NM_000130    | F5       | 2675 | 2712 | 3.32468059291     |
| NM_000130    | F5       | 4326 | 4468 | 4.9136606938      |
| NM_000130    | F5       | 2069 | 2202 | 7.23558878869     |
| NM_000130    | F5       | 3719 | 3807 | 4.32869819308     |
| NM_000130    | F5       | 592  | 641  | 3.32852444276     |
| NM_000130    | F5       | 6258 | 6327 | 4.9136606938      |
| NM_000130    | F5       | 5958 | 6046 | 4.9136606938      |
| NM_000130    | F5       | 4880 | 5012 | 5.9136606938      |
| NM_000130    | F5       | 5414 | 5494 | 6.13605311514     |
| NM_000130    | F5       | 3989 | 4305 | 6.9136606938      |
| NM_000130    | F5       | 3816 | 3988 | 4.9136606938      |
| NM_000130    | F5       | 6769 | 6875 | 4.32869819308     |
| NM_000130    | F5       | 1796 | 1875 | 4.91366068625     |
| NM_000130    | F5       | 5125 | 5247 | 6.78812981172     |
| NM_000130    | F5       | 658  | 767  | 4.32869819308     |
| NM_000130    | F5       | 1648 | 1794 | 5.9136606938      |
| NM_021009    | UBC      | 398  | 596  | 6.26600726506     |
| NM_021009    | UBC      | 597  | 808  | 5.26600726506     |
| NM_021009    | UBC      | 811  | 2511 | 9.48605574593     |
| NM_152482    | C19orf25 |      | 653  | 706 6.99137305825 |
| NM_021003    | PPM1A    | 2726 | 2746 | 4.99002842682     |
| NM_021003    | PPM1A    | 406  | 474  | 6.994046027       |
| NM_021003    | PPM1A    | 1495 | 1610 | 7.57900852772     |
| NM_021003    | PPM1A    | 725  | 846  | 5.994046027       |
| NM_021003    | PPM1A    | 61   | 101  | 4.99387227668     |
| NM_021003    | PPM1A    | 947  | 1043 | 5.99404579108     |
| NM_021003    | PPM1A    | 1813 | 1875 | 5.99403929594     |
| NM_021003    | PPM1A    | 508  | 650  | 6.57900852772     |
| NM_021007    | SCN2A    | 955  | 999  | 13.19599242       |
| NM_001205228 | SORT1    | 5526 | 5602 | 6.29792266588     |
| NM_001205228 | SORT1    | 5345 | 5411 | 6.56095707172     |
| NM_001205228 | SORT1    | 2592 | 2666 | 5.56095707171     |
| NM_001205228 | SORT1    | 3901 | 3945 | 4.97582082068     |
| NM_001205228 | SORT1    | 3530 | 3613 | 5.975994571       |
| NM_001205228 | SORT1    | 3309 | 3368 | 4.97582082068     |
| NM_001205228 | SORT1    | 3636 | 3680 | 4.97599456345     |
| NM_001205228 | SORT1    | 3016 | 3076 | 4.97599457099     |

|              |         |      |      |               |
|--------------|---------|------|------|---------------|
| NM_001205228 | SORT1   | 3085 | 3118 | 3.975994571   |
| NM_001205228 | SORT1   | 1719 | 1765 | 4.97598783994 |
| NM_001205228 | SORT1   | 1389 | 1462 | 6.56095707172 |
| NM_001205228 | SORT1   | 331  | 773  | 10.0634574122 |
| NM_001205228 | SORT1   | 1525 | 1716 | 7.88288516661 |
| NM_001205228 | SORT1   | 3372 | 3458 | 5.56095034067 |
| NM_001205228 | SORT1   | 2480 | 2592 | 7.67643428914 |
| NM_001205228 | SORT1   | 2916 | 2984 | 5.56095707172 |
| NM_001205228 | SORT1   | 4673 | 4749 | 5.56095707172 |
| NM_001205228 | SORT1   | 5031 | 5096 | 4.97197697082 |
| NM_001205228 | SORT1   | 6895 | 6977 | 5.56095707172 |
| NM_001205228 | SORT1   | 2806 | 2898 | 6.56095707172 |
| NM_001205228 | SORT1   | 6445 | 6559 | 6.29792266588 |
| NM_001205228 | SORT1   | 789  | 1369 | 9.73088207316 |
| NM_001205228 | SORT1   | 4435 | 4626 | 7.56095707172 |
| NM_001205228 | SORT1   | 4834 | 4917 | 4.89185536161 |
| NM_001205228 | SORT1   | 6603 | 6792 | 6.29792266588 |
| NM_001205228 | SORT1   | 1768 | 2467 | 10.2613967899 |
| NM_001205228 | SORT1   | 2678 | 2785 | 6.78334949306 |
| NM_001205228 | SORT1   | 5962 | 6098 | 6.56095707172 |
| NM_021005    | NR2F2   | 2577 | 2619 | 8.35883133501 |
| NM_021005    | NR2F2   | 2896 | 3002 | 9.35900508533 |
| NM_021005    | NR2F2   | 2848 | 2889 | 8.3590050851  |
| NM_021005    | NR2F2   | 566  | 621  | 7.27486587594 |
| NM_021005    | NR2F2   | 3208 | 3253 | 7.27486587594 |
| NM_021005    | NR2F2   | 2190 | 2286 | 8.94396758604 |
| NM_173552    | C3orf58 | 1341 | 1432 | 10.1432107337 |
| NM_173552    | C3orf58 | 4268 | 4309 | 8.73714342942 |
| NM_173552    | C3orf58 | 1872 | 1922 | 7.81726503863 |
| NM_173552    | C3orf58 | 1441 | 1525 | 9.8212826388  |
| NM_173552    | C3orf58 | 1556 | 1670 | 9.8212826388  |
| NM_173555    | TYSND1  | 2496 | 2551 | 10.2883503312 |
| NM_182551    | LCLAT1  | 1326 | 1421 | 10.1334453849 |
| NM_182551    | LCLAT1  | 715  | 778  | 10.0493061755 |
| NM_182551    | LCLAT1  | 882  | 988  | 9.1334453849  |
| NM_182551    | LCLAT1  | 1172 | 1290 | 11.7184078856 |
| NM_182551    | LCLAT1  | 567  | 707  | 11.940800307  |
| NM_014239    | EIF2B2  | 632  | 705  | 8.14362268076 |
| NM_014239    | EIF2B2  | 933  | 1024 | 6.55866691087 |
| NM_014239    | EIF2B2  | 1254 | 1292 | 7.47452770171 |
| NM_014239    | EIF2B2  | 1076 | 1147 | 8.55866691109 |
| NM_014239    | EIF2B2  | 711  | 751  | 8.14362941181 |
| NM_014239    | EIF2B2  | 347  | 446  | 8.14362941182 |
| NM_014239    | EIF2B2  | 74   | 133  | 6.55866667518 |
| NM_014239    | EIF2B2  | 483  | 538  | 6.55866018004 |
| NM_014239    | EIF2B2  | 805  | 910  | 8.88059500598 |
| NM_001001975 | ATP5D   | 618  | 701  | 6.31983004941 |
| NM_001001975 | ATP5D   | 333  | 404  | 5.73084994852 |
| NM_001001975 | ATP5D   | 177  | 246  | 4.73469379837 |
| NM_001001975 | ATP5D   | 407  | 613  | 7.73486754869 |



|           |          |      |      |      |                 |
|-----------|----------|------|------|------|-----------------|
| NM_182556 | SLC25A45 |      | 2159 | 2205 | 10.0512966706   |
| NM_182556 | SLC25A45 |      | 199  | 294  | 11.6364329141   |
| NM_182556 | SLC25A45 |      | 1564 | 1639 | 10.0514704209   |
| NM_001239 | CCNH     | 1006 | 1062 |      | 3.83905426319   |
| NM_006294 | UQCRB    | 1340 | 1381 |      | -0.892879874788 |
| NM_006294 | UQCRB    | 273  | 393  |      | 1.69610022611   |
| NM_006294 | UQCRB    | 131  | 269  |      | 1.91849264744   |
| NM_006294 | UQCRB    | 401  | 545  |      | 1.11113772539   |
| NM_006295 | VARS     | 3436 | 3537 |      | 8.53272521256   |
| NM_006295 | VARS     | 3548 | 3607 |      | 8.11768771328   |
| NM_006295 | VARS     | 2582 | 2649 |      | 7.53272521256   |
| NM_006295 | VARS     | 2473 | 2532 |      | 7.53272521256   |
| NM_006295 | VARS     | 1839 | 1891 |      | 8.53272521256   |
| NM_006295 | VARS     | 1689 | 1810 |      | 9.11768771328   |
| NM_006295 | VARS     | 4075 | 4110 |      | 5.53255146224   |
| NM_006295 | VARS     | 1323 | 1370 |      | 6.53255146224   |
| NM_006295 | VARS     | 741  | 777  |      | 5.44858600318   |
| NM_006295 | VARS     | 343  | 470  |      | 7.85465330745   |
| NM_006295 | VARS     | 3361 | 3426 |      | 6.53272521256   |
| NM_006295 | VARS     | 547  | 596  |      | 5.52870761239   |
| NM_006295 | VARS     | 3794 | 3841 |      | 7.11768771328   |
| NM_006295 | VARS     | 4120 | 4198 |      | 5.53272521256   |
| NM_006295 | VARS     | 1981 | 2301 |      | 10.4396158082   |
| NM_006295 | VARS     | 2323 | 2461 |      | 8.34008013462   |
| NM_006295 | VARS     | 2670 | 3006 |      | 9.85465330745   |
| NM_006295 | VARS     | 3009 | 3310 |      | 9.92504263534   |
| NM_006295 | VARS     | 1471 | 1687 |      | 8.702650214     |
| NM_006295 | VARS     | 3906 | 4028 |      | 8.34008013462   |
| NM_006295 | VARS     | 891  | 1082 |      | 8.702650214     |
| NM_006297 | XRCC1    | 1541 | 1585 |      | 5.53831832868   |
| NM_006297 | XRCC1    | 224  | 268  |      | 5.53831832868   |
| NM_006297 | XRCC1    | 278  | 390  |      | 7.62245753806   |
| NM_006297 | XRCC1    | 101  | 186  |      | 7.20742003878   |
| NM_006290 | TNFAIP3  | 3276 | 3338 |      | 6.53441329323   |
| NM_006290 | TNFAIP3  | 3704 | 3744 |      | 6.53039569306   |
| NM_006290 | TNFAIP3  | 4192 | 4238 |      | 6.53039569306   |
| NM_006290 | TNFAIP3  | 3023 | 3091 |      | 5.53423954292   |
| NM_006290 | TNFAIP3  | 3897 | 4027 |      | 7.53441329324   |
| NM_006290 | TNFAIP3  | 768  | 846  |      | 7.53441329323   |
| NM_006292 | TSG101   | 1474 | 1528 |      | 5.25781202869   |
| NM_006293 | TYR03    | 1373 | 1458 |      | 8.98180608016   |
| NM_006293 | TYR03    | 1716 | 1770 |      | 7.39684357922   |
| NM_006293 | TYR03    | 2566 | 2629 |      | 7.39684357944   |
| NM_006293 | TYR03    | 2472 | 2557 |      | 7.98180608016   |
| NM_006293 | TYR03    | 3200 | 3243 |      | 6.39282597927   |
| NM_006293 | TYR03    | 3428 | 3474 |      | 7.98179934911   |
| NM_006293 | TYR03    | 701  | 735  |      | 6.39684334352   |
| NM_006293 | TYR03    | 3807 | 3872 |      | 6.39683684839   |
| NM_006293 | TYR03    | 2633 | 2683 |      | 7.39282597927   |
| NM_006293 | TYR03    | 1057 | 1115 |      | 7.39684357944   |

|           |          |      |      |               |               |
|-----------|----------|------|------|---------------|---------------|
| NM_006293 | TYR03    | 447  | 528  | 7.98163232985 |               |
| NM_006293 | TYR03    | 2363 | 2398 | 6.39683684839 |               |
| NM_006293 | TYR03    | 1519 | 1578 | 7.98180608016 |               |
| NM_006293 | TYR03    | 1799 | 1907 | 8.71877167433 |               |
| NM_006293 | TYR03    | 830  | 919  | 7.98180608016 |               |
| NM_006293 | TYR03    | 3686 | 3762 | 6.39684357189 |               |
| NM_006293 | TYR03    | 919  | 1001 | 7.39684357922 |               |
| NM_006293 | TYR03    | 2115 | 2354 | 10.4843064207 |               |
| NM_153326 | AKR1A1   | 1316 | 1398 | 4.99262566747 |               |
| NM_153326 | AKR1A1   | 518  | 666  | 5.58160576836 |               |
| NM_153326 | AKR1A1   | 998  | 1065 | 5.58160576836 |               |
| NM_153326 | AKR1A1   | 1177 | 1218 | 3.99262566747 |               |
| NM_153326 | AKR1A1   | 344  | 471  | 5.58160576836 |               |
| NM_153326 | AKR1A1   | 680  | 825  | 6.58160576836 |               |
| NM_153326 | AKR1A1   | 826  | 934  | 5.58160576836 |               |
| NM_006123 | IDS      | 325  | 370  | 9.1194009406  |               |
| NM_006123 | IDS      | 484  | 549  | 8.19952254981 |               |
| NM_004830 | MED23    | 3837 | 3877 | 6.58118897837 |               |
| NM_004830 | MED23    | 600  | 654  | 6.58118897837 |               |
| NM_004830 | MED23    | 1349 | 1403 | 7.66532818753 |               |
| NM_004830 | MED23    | 3396 | 3447 | 8.25028395742 |               |
| NM_004830 | MED23    | 1573 | 1629 | 8.25011693816 |               |
| NM_004830 | MED23    | 428  | 495  | 7.66131058758 |               |
| NM_004830 | MED23    | 3649 | 3724 | 6.66131058758 |               |
| NM_004830 | MED23    | 233  | 286  | 6.66131058758 |               |
| NM_004830 | MED23    | 2283 | 2329 | 8.58118897837 |               |
| NM_004830 | MED23    | 3051 | 3089 | 7.66131058758 |               |
| NM_004830 | MED23    | 956  | 1033 | 7.66532818753 |               |
| NM_004830 | MED23    | 3170 | 3247 | 8.25029068848 |               |
| NM_004830 | MED23    | 2553 | 2621 | 8.25029068848 |               |
| NM_004830 | MED23    | 3963 | 4090 | 8.25029068848 |               |
| NM_004830 | MED23    | 2845 | 2902 | 7.6653214567  |               |
| NM_004830 | MED23    | 859  | 950  | 8.98708253232 |               |
| NM_153329 | ALDH16A1 |      | 1784 | 1837          | 8.45157202457 |
| NM_153329 | ALDH16A1 |      | 1074 | 1124          | 8.36743954624 |
| NM_153329 | ALDH16A1 |      | 2974 | 3049          | 8.45157202457 |
| NM_153329 | ALDH16A1 |      | 222  | 259           | 8.4514050053  |
| NM_153329 | ALDH16A1 |      | 649  | 707           | 9.4514050053  |
| NM_153329 | ALDH16A1 |      | 2095 | 2164          | 9.45157875562 |
| NM_153329 | ALDH16A1 |      | 1544 | 1671          | 10.4515787556 |
| NM_003400 | XP01     | 3211 | 3329 | 6.50775111357 |               |
| NM_003400 | XP01     | 3640 | 3721 | 5.22764319438 |               |
| NM_003400 | XP01     | 2103 | 2173 | 4.74221636721 |               |
| NM_003400 | XP01     | 3378 | 3436 | 4.42028827232 |               |
| NM_003400 | XP01     | 2621 | 2710 | 5.22764319438 |               |
| NM_003400 | XP01     | 4357 | 4479 | 6.00525077304 |               |
| NM_003400 | XP01     | 3091 | 3142 | 3.42028826477 |               |
| NM_003400 | XP01     | 364  | 411  | 4.42028827232 |               |
| NM_003400 | XP01     | 546  | 597  | 3.42028826477 |               |
| NM_003400 | XP01     | 1968 | 2087 | 5.42028827232 |               |

|              |        |      |      |               |
|--------------|--------|------|------|---------------|
| NM_003400    | XP01   | 1387 | 1459 | 4.42028827232 |
| NM_003400    | XP01   | 3501 | 3562 | 3.42028154127 |
| NM_003400    | XP01   | 276  | 351  | 2.42028826477 |
| NM_003400    | XP01   | 4555 | 4590 | 2.33614906294 |
| NM_003400    | XP01   | 838  | 1012 | 6.00525077304 |
| NM_003400    | XP01   | 3949 | 3986 | 3.41627067215 |
| NM_003400    | XP01   | 3761 | 3912 | 5.00525077304 |
| NM_003400    | XP01   | 2954 | 3086 | 6.00525077304 |
| NM_003400    | XP01   | 1163 | 1355 | 6.00525077304 |
| NM_003400    | XP01   | 2528 | 2615 | 4.74221636721 |
| NM_003400    | XP01   | 1474 | 1922 | 7.8126056951  |
| NM_003400    | XP01   | 2736 | 2885 | 5.22764319438 |
| NM_003400    | XP01   | 2177 | 2331 | 5.87971989096 |
| NM_003400    | XP01   | 4641 | 4795 | 5.42028827232 |
| NM_003400    | XP01   | 1012 | 1154 | 5.00525077304 |
| NM_003400    | XP01   | 2351 | 2500 | 6.59021327376 |
| NM_004834    | MAP4K4 | 2892 | 2943 | 3.98757056075 |
| NM_004834    | MAP4K4 | 4084 | 4131 | 3.98739681066 |
| NM_004834    | MAP4K4 | 653  | 712  | 4.40260806025 |
| NM_004834    | MAP4K4 | 3534 | 3581 | 4.72453615514 |
| NM_004834    | MAP4K4 | 2740 | 2797 | 3.98757032505 |
| NM_004834    | MAP4K4 | 3992 | 4048 | 2.39859046008 |
| NM_004834    | MAP4K4 | 835  | 931  | 5.20996298231 |
| NM_004834    | MAP4K4 | 3583 | 3663 | 2.40260806025 |
| NM_004834    | MAP4K4 | 302  | 344  | 3.31846885087 |
| NM_004834    | MAP4K4 | 7082 | 7128 | 2.40260782433 |
| NM_004834    | MAP4K4 | 5330 | 5383 | 5.57253306169 |
| NM_004834    | MAP4K4 | 3302 | 3350 | 3.98739681066 |
| NM_004834    | MAP4K4 | 4351 | 4420 | 3.31846885087 |
| NM_004834    | MAP4K4 | 3012 | 3093 | 4.72453615514 |
| NM_004834    | MAP4K4 | 398  | 535  | 5.98757056097 |
| NM_004834    | MAP4K4 | 4677 | 4729 | 3.4026013292  |
| NM_004834    | MAP4K4 | 3155 | 3287 | 5.98757056097 |
| NM_004834    | MAP4K4 | 3671 | 3827 | 5.86203967889 |
| NM_004834    | MAP4K4 | 536  | 612  | 2.40260806025 |
| NM_004834    | MAP4K4 | 4174 | 4274 | 3.40260806025 |
| NM_004834    | MAP4K4 | 3840 | 3969 | 4.98757056097 |
| NM_004834    | MAP4K4 | 3361 | 3466 | 4.40260806025 |
| NM_004834    | MAP4K4 | 1097 | 1189 | 3.98757056097 |
| NM_004834    | MAP4K4 | 2504 | 2687 | 4.98757056097 |
| NM_004834    | MAP4K4 | 2352 | 2502 | 3.98757056097 |
| NM_004834    | MAP4K4 | 1408 | 1500 | 3.98757055342 |
| NM_001164382 | STAU2  | 483  | 540  | 6.04252604844 |
| NM_001197218 | PDE4D  | 1650 | 1704 | 9.05634961865 |
| NM_005406    | ROCK1  | 2985 | 3071 | 4.4450242786  |
| NM_005406    | ROCK1  | 2081 | 2129 | 3.36490266939 |
| NM_005406    | ROCK1  | 4539 | 4614 | 5.77096997366 |
| NM_005406    | ROCK1  | 2569 | 2635 | 3.44886812846 |
| NM_005406    | ROCK1  | 630  | 744  | 5.02998677932 |
| NM_005406    | ROCK1  | 1952 | 2021 | 4.44886812846 |

|           |         |      |      |               |
|-----------|---------|------|------|---------------|
| NM_005406 | ROCK1   | 933  | 1067 | 4.44904187877 |
| NM_005406 | ROCK1   | 6310 | 6398 | 3.44904187877 |
| NM_005406 | ROCK1   | 4641 | 4689 | 4.4450242786  |
| NM_005407 | SALL2   | 3209 | 3260 | 8.70415348129 |
| NM_005401 | PTPN14  | 4325 | 4360 | 8.93269663761 |
| NM_005401 | PTPN14  | 6510 | 6590 | 8.01281824682 |
| NM_005401 | PTPN14  | 4143 | 4213 | 8.01281824682 |
| NM_005402 | RALA    | 813  | 850  | 3.19167744027 |
| NM_005402 | RALA    | 277  | 346  | 4.19185118304 |
| NM_005402 | RALA    | 2282 | 2353 | 3.18783359042 |
| NM_005402 | RALA    | 361  | 419  | 4.19185118304 |
| NM_005402 | RALA    | 495  | 550  | 3.10771198121 |
| NM_005402 | RALA    | 696  | 794  | 4.77681369131 |
| NM_006471 | MYL12A  | 542  | 632  | 3.32047553537 |
| NM_006471 | MYL12A  | 485  | 540  | 3.80590236254 |
| NM_006471 | MYL12A  | 644  | 700  | 3.5835099412  |
| NM_006471 | MYL12A  | 721  | 836  | 4.16847244192 |
| NM_006471 | MYL12A  | 853  | 1106 | 5.85652843561 |
| NM_006471 | MYL12A  | 285  | 448  | 3.99854744048 |
| NM_003113 | SP100   | 246  | 298  | 6.67445760399 |
| NM_003113 | SP100   | 2475 | 2523 | 7.67847496824 |
| NM_003113 | SP100   | 407  | 490  | 7.67846847311 |
| NM_003115 | UAP1    | 1891 | 1933 | 5.18967548171 |
| NM_003115 | UAP1    | 308  | 350  | 4.10571002264 |
| NM_003115 | UAP1    | 216  | 267  | 4.18583163186 |
| NM_006476 | ATP5L   | 123  | 194  | 1.37805991116 |
| NM_006476 | ATP5L   | 573  | 680  | 3.70400560622 |
| NM_006476 | ATP5L   | 364  | 559  | 4.63000502477 |
| NM_006476 | ATP5L   | 241  | 364  | 3.84150912997 |
| NM_144765 | MPZL2   | 1049 | 1153 | 8.29867267782 |
| NM_144765 | MPZL2   | 206  | 335  | 7.62060077271 |
| NM_144765 | MPZL2   | 347  | 1016 | 11.5654592185 |
| NM_180977 | PPP2R5D | 215  | 261  | 6.41288004553 |
| NM_180977 | PPP2R5D | 563  | 597  | 5.32874084369 |
| NM_180977 | PPP2R5D | 1187 | 1237 | 4.41287332202 |
| NM_180977 | PPP2R5D | 329  | 417  | 5.9978425538  |
| NM_180977 | PPP2R5D | 1537 | 1617 | 5.41287981716 |
| NM_207191 | ADAM15  | 2430 | 2545 | 9.76830505995 |
| NM_207191 | ADAM15  | 739  | 807  | 9.76830505995 |
| NM_207191 | ADAM15  | 1757 | 1801 | 7.44637696507 |
| NM_207191 | ADAM15  | 854  | 982  | 10.4463769651 |
| NM_207191 | ADAM15  | 1548 | 1609 | 9.44637696506 |
| NM_207191 | ADAM15  | 436  | 543  | 9.03133946579 |
| NM_207191 | ADAM15  | 1011 | 1122 | 10.2537318871 |
| NM_207191 | ADAM15  | 602  | 695  | 10.0313394658 |
| NM_207191 | ADAM15  | 1368 | 1516 | 10.4463769651 |
| NM_207191 | ADAM15  | 301  | 387  | 8.44637696507 |
| NM_207191 | ADAM15  | 1882 | 1972 | 8.44637696507 |
| NM_207191 | ADAM15  | 1977 | 2120 | 9.76830505995 |
| NM_178868 | CMTM8   | 637  | 692  | 9.50683185786 |

|              |         |      |      |               |
|--------------|---------|------|------|---------------|
| NM_178868    | CMTM8   | 936  | 1020 | 6.69545933563 |
| NM_178868    | CMTM8   | 374  | 568  | 9.6994769358  |
| NM_032521    | PAR6B   | 304  | 337  | 6.37779894995 |
| NM_032523    | OSBPL6  | 3030 | 3079 | 12.5498551621 |
| NM_032523    | OSBPL6  | 1596 | 1680 | 13.5538660312 |
| NM_032525    | TUBB6   | 593  | 703  | 11.0031925864 |
| NM_032256    | TMEM117 | 884  | 948  | 9.36099244266 |
| NM_152743    | BRAT1   | 981  | 1034 | 10.7241178697 |
| NM_152743    | BRAT1   | 2739 | 2793 | 11.3090803629 |
| NM_152743    | BRAT1   | 1279 | 1354 | 9.72411786217 |
| NM_152743    | BRAT1   | 1417 | 1498 | 11.3090803629 |
| NM_152743    | BRAT1   | 2349 | 2463 | 12.7241178697 |
| NM_152743    | BRAT1   | 288  | 336  | 9.63997866033 |
| NM_152743    | BRAT1   | 2164 | 2233 | 9.72010026954 |
| NM_152743    | BRAT1   | 1729 | 1825 | 10.7241178697 |
| NM_152743    | BRAT1   | 407  | 527  | 11.3090803704 |
| NM_152743    | BRAT1   | 1872 | 1975 | 10.7241178697 |
| NM_152743    | BRAT1   | 1047 | 1236 | 12.8940428712 |
| NM_032259    | WDR24   | 70   | 130  | 9.06054530916 |
| NM_013285    | GNL2    | 1390 | 1498 | 6.36140356455 |
| NM_013285    | GNL2    | 505  | 559  | 4.77644106361 |
| NM_013285    | GNL2    | 1159 | 1239 | 5.77644106383 |
| NM_013285    | GNL2    | 653  | 789  | 6.58379598589 |
| NM_013285    | GNL2    | 1240 | 1332 | 4.77644106382 |
| NM_013286    | RBM15B  | 3833 | 3887 | 8.22604753315 |
| NM_013286    | RBM15B  | 3006 | 3094 | 8.96703072749 |
| NM_013286    | RBM15B  | 1757 | 1812 | 7.56096342322 |
| NM_013283    | MAT2B   | 440  | 493  | 5.20664675927 |
| NM_014060    | MCTS1   | 5858 | 5926 | 6.88693379971 |
| NM_014060    | MCTS1   | 1755 | 1802 | 5.88676004939 |
| NM_014060    | MCTS1   | 224  | 278  | 5.80279459033 |
| NM_014060    | MCTS1   | 919  | 994  | 7.47188956938 |
| NM_014060    | MCTS1   | 8377 | 8431 | 5.88291619954 |
| NM_014060    | MCTS1   | 7917 | 7960 | 5.80279459033 |
| NM_014062    | NOB1    | 1560 | 1621 | 3.99918454577 |
| NM_014062    | NOB1    | 387  | 447  | 3.99935156504 |
| NM_014062    | NOB1    | 534  | 601  | 4.58432056089 |
| NM_014062    | NOB1    | 89   | 192  | 4.58432079681 |
| NM_014062    | NOB1    | 870  | 956  | 5.32128639098 |
| NM_014063    | DBNL    | 232  | 338  | 6.97173296071 |
| NM_014063    | DBNL    | 590  | 639  | 7.55669545388 |
| NM_014063    | DBNL    | 1915 | 1962 | 5.97173296049 |
| NM_014063    | DBNL    | 540  | 588  | 5.97173295316 |
| NM_014063    | DBNL    | 344  | 403  | 6.97155921039 |
| NM_014063    | DBNL    | 437  | 479  | 5.97172622966 |
| NM_014063    | DBNL    | 1798 | 1903 | 5.97173296071 |
| NM_014063    | DBNL    | 1428 | 1503 | 6.97173295316 |
| NM_014063    | DBNL    | 1564 | 1639 | 6.97173296049 |
| NM_001007468 | SMARCB1 | 907  | 991  | 5.02960496588 |
| NM_001007468 | SMARCB1 | 620  | 674  | 3.02960495833 |

|              |         |      |      |               |
|--------------|---------|------|------|---------------|
| NM_001007468 | SMARCB1 | 742  | 899  | 6.35153306077 |
| NM_001007468 | SMARCB1 | 1212 | 1310 | 4.02960496588 |
| NM_001007468 | SMARCB1 | 396  | 515  | 5.35153306077 |
| NM_001007468 | SMARCB1 | 1068 | 1205 | 4.6145674666  |
| NM_001007468 | SMARCB1 | 206  | 313  | 5.02960496588 |
| NM_001007468 | SMARCB1 | 313  | 380  | 4.61456723068 |
| NM_001007464 | RWDD1   | 429  | 489  | 3.56067438835 |
| NM_001007464 | RWDD1   | 129  | 209  | 3.14563688907 |
| NM_015626    | WSB1    | 2195 | 2250 | 3.60300743269 |
| NM_015626    | WSB1    | 579  | 666  | 5.18796993341 |
| NM_015626    | WSB1    | 1174 | 1214 | 3.60300070163 |
| NM_015626    | WSB1    | 1932 | 2031 | 4.60300743269 |
| NM_015626    | WSB1    | 1030 | 1163 | 6.77293243413 |
| NM_015626    | WSB1    | 2281 | 2428 | 7.60300743269 |
| NM_015626    | WSB1    | 2530 | 2705 | 7.06243905132 |
| NM_015626    | WSB1    | 1527 | 1614 | 5.18796993341 |
| NM_015626    | WSB1    | 297  | 454  | 5.18796993341 |
| NM_015626    | WSB1    | 679  | 801  | 5.92493552757 |
| NM_015626    | WSB1    | 1621 | 1926 | 7.92493552757 |
| NM_015626    | WSB1    | 956  | 1029 | 4.60300070163 |
| NM_015626    | WSB1    | 2428 | 2503 | 3.60300743269 |
| NM_015626    | WSB1    | 1243 | 1348 | 5.60300743269 |
| NM_015626    | WSB1    | 1354 | 1508 | 6.41036235474 |
| NM_015622    | CCZ1    | 1046 | 1117 | 6.05355355542 |
| NM_015622    | CCZ1    | 304  | 351  | 3.96941434604 |
| NM_015622    | CCZ1    | 926  | 989  | 5.63851604859 |
| NM_015622    | CCZ1    | 723  | 807  | 5.63851604859 |
| NM_015622    | CCZ1    | 370  | 509  | 6.63851605614 |
| NM_015622    | CCZ1    | 1509 | 1753 | 7.63851605614 |
| NM_015622    | CCZ1    | 227  | 304  | 6.37548165031 |
| NM_015622    | CCZ1    | 1307 | 1452 | 6.63851605614 |
| NM_015622    | CCZ1    | 591  | 662  | 4.04953595525 |
| NM_002577    | PAK2    | 302  | 352  | 5.92424150305 |
| NM_002577    | PAK2    | 3823 | 3872 | 5.33526140237 |
| NM_002577    | PAK2    | 1674 | 1731 | 5.33927900255 |
| NM_002577    | PAK2    | 578  | 626  | 5.92424126735 |
| NM_002577    | PAK2    | 1058 | 1150 | 7.1466339246  |
| NM_002577    | PAK2    | 2635 | 2712 | 6.33927900233 |
| NM_002577    | PAK2    | 2270 | 2362 | 6.33927900255 |
| NM_002577    | PAK2    | 1434 | 1500 | 6.92424150327 |
| NM_002577    | PAK2    | 1964 | 2042 | 5.92424150327 |
| NM_002577    | PAK2    | 979  | 1057 | 5.33927900254 |
| NM_002577    | PAK2    | 4068 | 4167 | 6.66120709743 |
| NM_002577    | PAK2    | 2374 | 2512 | 5.92424150327 |
| NM_002577    | PAK2    | 1524 | 1649 | 6.33927900255 |
| NM_002577    | PAK2    | 1176 | 1375 | 7.1466339246  |
| NM_002577    | PAK2    | 3462 | 3539 | 4.33910525223 |
| NM_002577    | PAK2    | 875  | 948  | 4.33927900255 |
| NM_002577    | PAK2    | 627  | 748  | 6.33927900255 |
| NM_002576    | PAK1    | 767  | 837  | 8.12956694475 |

|              |          |      |      |               |               |
|--------------|----------|------|------|---------------|---------------|
| NM_002576    | PAK1     | 1469 | 1606 | 10.4555126398 |               |
| NM_001039999 | FAM83G   | 1449 | 1488 | 7.16840114145 |               |
| NM_001039999 | FAM83G   | 1893 | 1950 | 7.25254011491 |               |
| NM_001039999 | FAM83G   | 944  | 1053 | 8.83750285155 |               |
| NM_001039999 | FAM83G   | 721  | 777  | 8.25236660051 |               |
| NM_001039999 | FAM83G   | 1712 | 1757 | 7.25236660051 |               |
| NM_002572    | PAFAH1B2 |      | 422  | 455           | 4.11839360442 |
| NM_002572    | PAFAH1B2 |      | 879  | 938           | 3.20235906349 |
| NM_002572    | PAFAH1B2 |      | 1099 | 1191          | 4.78748858347 |
| NM_002572    | PAFAH1B2 |      | 4051 | 4107          | 4.20235906349 |
| NM_002572    | PAFAH1B2 |      | 190  | 298           | 5.52446090869 |
| NM_002572    | PAFAH1B2 |      | 3828 | 3879          | 3.11839360442 |
| NM_002572    | PAFAH1B2 |      | 3574 | 3635          | 5.20253257789 |
| NM_002572    | PAFAH1B2 |      | 671  | 751           | 5.20253281358 |
| NM_002572    | PAFAH1B2 |      | 2366 | 2440          | 4.20253281358 |
| NM_001113738 | ARL17A   | 1193 | 1237 | 7.07095725942 |               |
| NM_014399    | TSPAN13  | 119  | 223  | 10.8772701464 |               |
| NM_014399    | TSPAN13  | 1411 | 1525 | 9.55534205154 |               |
| NM_014399    | TSPAN13  | 1627 | 1685 | 9.55534181562 |               |
| NM_014399    | TSPAN13  | 865  | 985  | 12.5553420515 |               |
| NM_014399    | TSPAN13  | 1378 | 1405 | 8.55516830122 |               |
| NM_014399    | TSPAN13  | 240  | 847  | 15.5440267383 |               |
| NM_014399    | TSPAN13  | 991  | 1156 | 13.4622326471 |               |
| NM_014399    | TSPAN13  | 1156 | 1371 | 12.2557817697 |               |
| NM_014396    | VPS41    | 705  | 746  | 6.98166542868 |               |
| NM_014396    | VPS41    | 822  | 866  | 5.97782157882 |               |
| NM_014396    | VPS41    | 1062 | 1147 | 6.98183917877 |               |
| NM_014396    | VPS41    | 1704 | 1773 | 6.97782157882 |               |
| NM_014396    | VPS41    | 960  | 1000 | 6.89769996961 |               |
| NM_014396    | VPS41    | 3185 | 3293 | 5.98183917145 |               |
| NM_014396    | VPS41    | 457  | 527  | 7.56680167972 |               |
| NM_014396    | VPS41    | 2793 | 2843 | 5.97782157882 |               |
| NM_014396    | VPS41    | 323  | 421  | 6.98183917877 |               |
| NM_014394    | GHITM    | 343  | 422  | 5.04198670998 |               |
| NM_014394    | GHITM    | 1729 | 1791 | 3.03796910981 |               |
| NM_014394    | GHITM    | 1365 | 1427 | 5.6269492107  |               |
| NM_014394    | GHITM    | 1834 | 1922 | 5.84934163204 |               |
| NM_014394    | GHITM    | 424  | 603  | 7.36391480487 |               |
| NM_014394    | GHITM    | 852  | 1129 | 7.6269492107  |               |
| NM_014394    | GHITM    | 621  | 836  | 6.6269492107  |               |
| NM_014394    | GHITM    | 137  | 336  | 7.28991422343 |               |
| NM_014394    | GHITM    | 1136 | 1364 | 6.74242642812 |               |
| NM_014394    | GHITM    | 1578 | 1727 | 4.04198670998 |               |
| NM_014390    | SND1     | 2629 | 2752 | 5.40886524988 |               |
| NM_014390    | SND1     | 745  | 841  | 5.67189965572 |               |
| NM_014390    | SND1     | 841  | 881  | 4.08291955482 |               |
| NM_014390    | SND1     | 1776 | 1908 | 7.086937155   |               |
| NM_014390    | SND1     | 2752 | 2956 | 6.67189965572 |               |
| NM_014390    | SND1     | 3031 | 3091 | 3.08693691908 |               |
| NM_014390    | SND1     | 911  | 1050 | 6.67189965572 |               |

|           |        |      |      |               |
|-----------|--------|------|------|---------------|
| NM_014390 | SND1   | 583  | 732  | 6.086937155   |
| NM_014390 | SND1   | 2406 | 2619 | 6.54636877363 |
| NM_014390 | SND1   | 1595 | 1757 | 6.25686215644 |
| NM_014390 | SND1   | 2219 | 2401 | 5.67189965572 |
| NM_014390 | SND1   | 1061 | 1594 | 7.99382775061 |
| NM_014390 | SND1   | 14   | 233  | 4.67189965572 |
| NM_014390 | SND1   | 336  | 574  | 7.33486466844 |
| NM_014390 | SND1   | 1928 | 2168 | 6.54636877363 |
| NM_014390 | SND1   | 3321 | 3466 | 7.67189965572 |
| NM_014391 | ANKRD1 | 1392 | 1477 | 5.02870920974 |
| NM_014391 | ANKRD1 | 317  | 397  | 7.02870920952 |
| NM_014391 | ANKRD1 | 1307 | 1346 | 5.94457000036 |
| NM_014391 | ANKRD1 | 650  | 815  | 8.48814082838 |
| NM_014391 | ANKRD1 | 1562 | 1767 | 7.02870920974 |
| NM_014391 | ANKRD1 | 229  | 293  | 6.02870920952 |
| NM_014391 | ANKRD1 | 510  | 648  | 8.19863421119 |
| NM_014391 | ANKRD1 | 916  | 1014 | 6.61367171046 |
| NM_014391 | ANKRD1 | 1021 | 1250 | 8.35063730463 |
| NM_018034 | WDR70  | 636  | 719  | 7.70389771876 |
| NM_018034 | WDR70  | 839  | 901  | 5.38179610947 |
| NM_018032 | LUC7L  | 1910 | 1969 | 3.95049408852 |
| NM_018032 | LUC7L  | 281  | 332  | 4.86652862945 |
| NM_018032 | LUC7L  | 780  | 855  | 3.95066783862 |
| NM_018031 | WDR6   | 1403 | 1487 | 7.71211416966 |
| NM_018031 | WDR6   | 2313 | 2354 | 6.04301245955 |
| NM_018031 | WDR6   | 797  | 869  | 7.12715166894 |
| NM_018031 | WDR6   | 3838 | 3894 | 7.12715166893 |
| NM_018031 | WDR6   | 2194 | 2247 | 8.12715166894 |
| NM_018031 | WDR6   | 703  | 750  | 7.12697791862 |
| NM_018031 | WDR6   | 1101 | 1152 | 8.12715166894 |
| NM_018031 | WDR6   | 2263 | 2307 | 7.71211416966 |
| NM_018031 | WDR6   | 1650 | 1706 | 7.12715166139 |
| NM_018031 | WDR6   | 3577 | 3630 | 8.12714493788 |
| NM_018031 | WDR6   | 3468 | 3540 | 8.12715166894 |
| NM_018031 | WDR6   | 1013 | 1089 | 7.71211416966 |
| NM_018031 | WDR6   | 2889 | 2931 | 6.04301245955 |
| NM_018031 | WDR6   | 337  | 415  | 6.12715166894 |
| NM_018031 | WDR6   | 2396 | 2477 | 7.71211416966 |
| NM_018031 | WDR6   | 1733 | 1790 | 7.71211416211 |
| NM_018031 | WDR6   | 2519 | 2601 | 7.71211416966 |
| NM_018031 | WDR6   | 2131 | 2194 | 7.71211393374 |
| NM_018031 | WDR6   | 1493 | 1543 | 7.7121074386  |
| NM_018031 | WDR6   | 4023 | 4205 | 8.12715166894 |
| NM_018031 | WDR6   | 1175 | 1389 | 9.44907976382 |
| NM_018031 | WDR6   | 2764 | 2885 | 8.44907976382 |
| NM_018031 | WDR6   | 1560 | 1650 | 7.12715166139 |
| NM_018031 | WDR6   | 2666 | 2763 | 6.12715166893 |
| NM_018031 | WDR6   | 3720 | 3837 | 8.12715166894 |
| NM_018031 | WDR6   | 227  | 300  | 7.12714493788 |
| NM_018031 | WDR6   | 3217 | 3314 | 7.71211416943 |



|              |          |      |      |                    |
|--------------|----------|------|------|--------------------|
| NM_018031    | WDR6     | 474  | 606  | 8.44907976382      |
| NM_018031    | WDR6     | 875  | 975  | 7.12697791862      |
| NM_033121    | ANKRD13A |      | 1267 | 1351 4.28813194074 |
| NM_033121    | ANKRD13A |      | 366  | 437 5.87310117251  |
| NM_033127    | SEC16B   | 1905 | 1941 | 7.79420004405      |
| NM_033127    | SEC16B   | 3386 | 3449 | 7.87833252238      |
| NM_033127    | SEC16B   | 1314 | 1370 | 7.87833252238      |
| NM_001242837 | AP2A2    | 2368 | 2424 | 6.18950745506      |
| NM_001242837 | AP2A2    | 3609 | 3647 | 5.60437793507      |
| NM_001242837 | AP2A2    | 1417 | 1512 | 4.60053408522      |
| NM_001242837 | AP2A2    | 1531 | 1578 | 5.60455144947      |
| NM_001242837 | AP2A2    | 961  | 1008 | 4.60455167784      |
| NM_001242837 | AP2A2    | 2471 | 2521 | 5.60053408522      |
| NM_001242837 | AP2A2    | 1590 | 1653 | 4.60455144947      |
| NM_001242837 | AP2A2    | 312  | 392  | 5.60455168539      |
| NM_001242837 | AP2A2    | 1242 | 1293 | 6.18951395019      |
| NM_001242837 | AP2A2    | 834  | 949  | 6.60455168539      |
| NM_000410    | HFE      | 294  | 341  | 9.19266980159      |
| NM_000410    | HFE      | 1311 | 1367 | 8.60368970824      |
| NM_000410    | HFE      | 1387 | 1445 | 8.52356809903      |
| NM_000410    | HFE      | 800  | 876  | 9.19266957322      |
| NM_000410    | HFE      | 1094 | 1164 | 8.60770730841      |
| NM_000410    | HFE      | 345  | 471  | 10.4150622305      |
| NM_001242829 | IP6K1    | 1534 | 1622 | 6.19625435974      |
| NM_001242829 | IP6K1    | 577  | 631  | 6.19624763624      |
| NM_001242829 | IP6K1    | 3017 | 3086 | 6.78121013696      |
| NM_001242829 | IP6K1    | 4588 | 4668 | 6.78121686801      |
| NM_032752    | ZNF496   | 1363 | 1428 | 8.57146098767      |
| NM_012399    | PITPNB   | 2264 | 2321 | 5.08475785016      |
| NM_012399    | PITPNB   | 930  | 969  | 3.00061864078      |
| NM_012399    | PITPNB   | 1125 | 1179 | 5.40266834488      |
| NM_012399    | PITPNB   | 2597 | 2654 | 4.66972035088      |
| NM_012399    | PITPNB   | 1376 | 1411 | 4.00061864078      |
| NM_012399    | PITPNB   | 798  | 847  | 4.66954660056      |
| NM_012394    | PFDN2    | 270  | 383  | 2.61428721544      |
| NM_012394    | PFDN2    | 151  | 254  | 4.61428721544      |
| NM_012395    | CDK14    | 818  | 880  | 10.8355775544      |
| NM_012395    | CDK14    | 4718 | 4757 | 10.8355775544      |
| NM_012395    | CDK14    | 1782 | 1832 | 12.5046725334      |
| NM_012395    | CDK14    | 1709 | 1759 | 11.9197100327      |
| NM_012395    | CDK14    | 212  | 277  | 11.9195430134      |
| NM_012392    | PEF1     | 1034 | 1106 | 7.22397781268      |
| NM_012392    | PEF1     | 1529 | 1618 | 8.80894680853      |
| NM_012392    | PEF1     | 1813 | 1866 | 8.80877329413      |
| NM_012392    | PEF1     | 677  | 789  | 9.22398454373      |
| NM_012393    | PFAS     | 2517 | 2579 | 7.54858372611      |
| NM_012393    | PFAS     | 199  | 251  | 7.54456612595      |
| NM_012393    | PFAS     | 1251 | 1324 | 9.12952862667      |
| NM_012393    | PFAS     | 4078 | 4112 | 7.5484099758       |
| NM_012393    | PFAS     | 2645 | 2679 | 7.46444451674      |

|           |         |      |      |               |
|-----------|---------|------|------|---------------|
| NM_012393 | PFAS    | 349  | 439  | 7.54857699507 |
| NM_012393 | PFAS    | 697  | 764  | 7.5484099758  |
| NM_012393 | PFAS    | 59   | 139  | 9.13354622684 |
| NM_012393 | PFAS    | 4656 | 4730 | 9.870511821   |
| NM_012393 | PFAS    | 251  | 293  | 7.54456612595 |
| NM_012393 | PFAS    | 777  | 815  | 7.46444451674 |
| NM_012393 | PFAS    | 3398 | 3518 | 9.13354622684 |
| NM_012393 | PFAS    | 3530 | 3594 | 7.54456612595 |
| NM_012393 | PFAS    | 1934 | 2026 | 8.54858371857 |
| NM_012393 | PFAS    | 3859 | 3949 | 8.54858372612 |
| NM_012393 | PFAS    | 4939 | 5027 | 7.5485834902  |
| NM_014938 | MLXIP   | 7828 | 7867 | 7.6725441434  |
| NM_014938 | MLXIP   | 5018 | 5063 | 9.25750664412 |
| NM_014938 | MLXIP   | 6424 | 6469 | 8.66853327428 |
| NM_014938 | MLXIP   | 7638 | 7700 | 7.6725441434  |
| NM_014938 | MLXIP   | 3708 | 3783 | 8.6725441434  |
| NM_014938 | MLXIP   | 4841 | 4996 | 9.25751337517 |
| NM_014939 | TRAPPC8 | 2909 | 2946 | 8.18203993148 |
| NM_014939 | TRAPPC8 | 623  | 691  | 7.26600539054 |
| NM_014939 | TRAPPC8 | 1835 | 1913 | 6.26617913331 |
| NM_014939 | TRAPPC8 | 4816 | 4854 | 6.26216154069 |
| NM_014939 | TRAPPC8 | 3255 | 3389 | 8.26617914086 |
| NM_014939 | TRAPPC8 | 1915 | 1980 | 7.26617240981 |
| NM_014931 | PPP6R1  | 1832 | 1890 | 5.21226629253 |
| NM_014931 | PPP6R1  | 3185 | 3241 | 5.21226629253 |
| NM_014931 | PPP6R1  | 5    | 73   | 5.21226629253 |
| NM_014931 | PPP6R1  | 1019 | 1076 | 5.20824869236 |
| NM_014931 | PPP6R1  | 516  | 579  | 5.79722879326 |
| NM_014931 | PPP6R1  | 1756 | 1826 | 5.79705504294 |
| NM_014931 | PPP6R1  | 2032 | 2077 | 5.79722879326 |
| NM_014931 | PPP6R1  | 915  | 959  | 4.21225956148 |
| NM_014931 | PPP6R1  | 443  | 507  | 6.53419438742 |
| NM_014931 | PPP6R1  | 216  | 400  | 6.79722879326 |
| NM_014931 | PPP6R1  | 2660 | 2738 | 5.21226629253 |
| NM_014931 | PPP6R1  | 1467 | 1599 | 6.21226629253 |
| NM_014931 | PPP6R1  | 1267 | 1416 | 6.21226629253 |
| NM_014931 | PPP6R1  | 786  | 913  | 6.79722879326 |
| NM_014931 | PPP6R1  | 1892 | 2017 | 6.21226629253 |
| NM_014931 | PPP6R1  | 608  | 776  | 7.67169791117 |
| NM_014935 | PLEKHA6 | 4618 | 4666 | 7.71973133332 |
| NM_014935 | PLEKHA6 | 5161 | 5203 | 7.71973133332 |
| NM_014935 | PLEKHA6 | 5318 | 5375 | 8.71990508363 |
| NM_014935 | PLEKHA6 | 1654 | 1705 | 7.71990508342 |
| NM_014935 | PLEKHA6 | 2680 | 2742 | 8.71989835259 |
| NM_014935 | PLEKHA6 | 5396 | 5470 | 9.30486758436 |
| NM_014935 | PLEKHA6 | 3503 | 3567 | 7.71588748347 |
| NM_014935 | PLEKHA6 | 5941 | 5997 | 7.71989835259 |
| NM_014935 | PLEKHA6 | 4537 | 4597 | 7.71990508363 |
| NM_014935 | PLEKHA6 | 4355 | 4406 | 7.71989835259 |
| NM_014935 | PLEKHA6 | 299  | 338  | 8.71588748347 |

|              |         |      |      |               |
|--------------|---------|------|------|---------------|
| NM_014935    | PLEKHA6 | 3136 | 3232 | 8.71990508363 |
| NM_014935    | PLEKHA6 | 3028 | 3090 | 7.71990484772 |
| NM_014935    | PLEKHA6 | 1177 | 1282 | 7.71990508363 |
| NM_014935    | PLEKHA6 | 2278 | 2328 | 7.71973133332 |
| NM_014935    | PLEKHA6 | 5516 | 5602 | 9.30486757681 |
| NM_002865    | RAB2A   | 1924 | 1971 | 4.38734087469 |
| NM_002865    | RAB2A   | 400  | 500  | 5.97231010646 |
| NM_002865    | RAB2A   | 938  | 971  | 3.38717385542 |
| NM_002865    | RAB2A   | 1173 | 1229 | 4.38734736982 |
| NM_002865    | RAB2A   | 1047 | 1084 | 4.96829250629 |
| NM_002865    | RAB2A   | 645  | 739  | 4.38734760574 |
| NM_017704    | ANKRD49 | 1102 | 1140 | 5.90639803709 |
| NM_017705    | PAQR5   | 3989 | 4019 | 9.97065922923 |
| NM_017705    | PAQR5   | 4047 | 4099 | 12.3767265335 |
| NM_017706    | WDR55   | 1856 | 1907 | 6.55485497837 |
| NM_017706    | WDR55   | 284  | 410  | 7.55502872868 |
| NM_017706    | WDR55   | 1365 | 1422 | 6.55101112851 |
| NM_017706    | WDR55   | 856  | 984  | 7.55502872114 |
| NM_017871    | CPSF3L  | 1918 | 1972 | 5.75714971482 |
| NM_017871    | CPSF3L  | 450  | 527  | 6.76116731498 |
| NM_017871    | CPSF3L  | 1498 | 1571 | 5.75714971482 |
| NM_017871    | CPSF3L  | 1038 | 1157 | 6.76116731499 |
| NM_017871    | CPSF3L  | 139  | 333  | 9.22059893363 |
| NM_017871    | CPSF3L  | 850  | 986  | 8.56852223705 |
| NM_017877    | C2orf18 | 2809 | 2854 | 10.2006914583 |
| NM_017877    | C2orf18 | 2089 | 2137 | 10.2808130675 |
| NM_017877    | C2orf18 | 1953 | 2033 | 9.69986793106 |
| NM_017877    | C2orf18 | 3102 | 3193 | 11.0217962619 |
| NM_017877    | C2orf18 | 337  | 423  | 11.0217962619 |
| NM_017877    | C2orf18 | 723  | 767  | 10.2848306601 |
| NM_017877    | C2orf18 | 967  | 1015 | 9.6958505668  |
| NM_017877    | C2orf18 | 448  | 516  | 8.69986143592 |
| NM_017877    | C2orf18 | 2037 | 2089 | 8.69986793106 |
| NM_017877    | C2orf18 | 1415 | 1522 | 11.2848306677 |
| NM_017877    | C2orf18 | 229  | 337  | 11.699868167  |
| NM_017877    | C2orf18 | 520  | 578  | 8.69986143592 |
| NM_017877    | C2orf18 | 588  | 698  | 10.2848306675 |
| NM_017877    | C2orf18 | 1022 | 1104 | 10.2848306677 |
| NM_017703    | FBXL12  | 245  | 290  | 8.64090504427 |
| NM_017703    | FBXL12  | 344  | 405  | 8.64090504427 |
| NM_001206999 | CIT     | 7364 | 7407 | 7.29158828127 |
| NM_001206999 | CIT     | 3668 | 3772 | 8.88056838216 |
| NM_001206999 | CIT     | 5598 | 5674 | 7.29560564553 |
| NM_001206999 | CIT     | 564  | 629  | 7.29158828127 |
| NM_001206999 | CIT     | 1129 | 1212 | 7.29158828127 |
| NM_001206998 | ZNRF3   | 2748 | 2835 | 7.15205950687 |
| NM_001206998 | ZNRF3   | 3207 | 3281 | 5.56709700615 |
| NM_001206998 | ZNRF3   | 316  | 357  | 6.57111437041 |
| NM_001206998 | ZNRF3   | 108  | 141  | 5.57110787527 |
| NM_001206998 | ZNRF3   | 744  | 796  | 7.15607710705 |

|              |           |      |      |                   |
|--------------|-----------|------|------|-------------------|
| NM_001206998 | ZNRF3     | 633  | 713  | 8.15607710705     |
| NM_001873    | CPE       | 1470 | 1531 | 3.06817391948     |
| NM_001873    | CPE       | 1171 | 1235 | 2.06818065053     |
| NM_001873    | CPE       | 2152 | 2205 | 2.65314291534     |
| NM_001873    | CPE       | 1264 | 1368 | 3.65314315125     |
| NM_001873    | CPE       | 750  | 938  | 4.23810565198     |
| NM_001873    | CPE       | 611  | 733  | 3.39010874542     |
| NM_001873    | CPE       | 961  | 1097 | 3.39010874542     |
| NM_001873    | CPE       | 1599 | 1676 | 2.65296940094     |
| NM_001002836 | ZNF787    | 1849 | 1921 | 11.7800822277     |
| NM_001002836 | ZNF787    | 1774 | 1843 | 9.45815413284     |
| NM_001002836 | ZNF787    | 506  | 551  | 10.4581541328     |
| NM_001002836 | ZNF787    | 1391 | 1453 | 8.45814740179     |
| NM_001002836 | ZNF787    | 1048 | 1097 | 8.37401492346     |
| NM_001002836 | ZNF787    | 279  | 335  | 10.0431166336     |
| NM_001002836 | ZNF787    | 210  | 271  | 10.0431166336     |
| NM_001002836 | ZNF787    | 398  | 463  | 8.45815413284     |
| NM_001002836 | ZNF787    | 1219 | 1312 | 9.45815413284     |
| NM_001002836 | ZNF787    | 1670 | 1768 | 9.45815413284     |
| NM_001002836 | ZNF787    | 1458 | 1662 | 11.4581541328     |
| XM_001126659 | LOC728026 |      | 82   | 114 6.81868298113 |
| XM_001126659 | LOC728026 |      | 125  | 199 6.81868971219 |
| NM_001079673 | FNDC3A    | 2827 | 2886 | 7.71638222094     |
| NM_001079673 | FNDC3A    | 5285 | 5362 | 7.12740212005     |
| NM_001079673 | FNDC3A    | 2695 | 2762 | 8.13141972021     |
| NM_001079673 | FNDC3A    | 2598 | 2631 | 6.04728051084     |
| NM_001079673 | FNDC3A    | 2228 | 2298 | 7.71638221339     |
| NM_001079673 | FNDC3A    | 1665 | 1732 | 6.12740212005     |
| NM_001079673 | FNDC3A    | 5426 | 5503 | 8.1314194843      |
| NM_001079673 | FNDC3A    | 1609 | 1654 | 7.71236462077     |
| NM_001079673 | FNDC3A    | 1855 | 1952 | 8.71638222094     |
| NM_001079673 | FNDC3A    | 830  | 913  | 7.1312459699      |
| NM_001079673 | FNDC3A    | 2090 | 2227 | 8.45334781511     |
| NM_001079673 | FNDC3A    | 609  | 703  | 7.71638198502     |
| NM_030808    | NDEL1     | 2194 | 2298 | 3.48701894956     |
| NM_030808    | NDEL1     | 1021 | 1053 | 2.81791723946     |
| NM_030808    | NDEL1     | 364  | 425  | 2.90188269852     |
| NM_030808    | NDEL1     | 1556 | 1617 | 2.89803884867     |
| NM_030808    | NDEL1     | 1064 | 1172 | 2.90205644884     |
| NM_030808    | NDEL1     | 772  | 836  | 1.90205644129     |
| NM_015484    | SYF2      | 595  | 670  | 2.59502546519     |
| NM_030801    | MAGED4B   | 2202 | 2241 | 4.34426891113     |
| NM_030801    | MAGED4B   | 1654 | 1686 | 4.34811276099     |
| NM_030801    | MAGED4B   | 2390 | 2441 | 4.34828651109     |
| NM_030801    | MAGED4B   | 1055 | 1116 | 5.34811276099     |
| NM_030801    | MAGED4B   | 1516 | 1652 | 6.93324901203     |
| NM_030801    | MAGED4B   | 2069 | 2152 | 7.15564143337     |
| NM_030801    | MAGED4B   | 2326 | 2373 | 4.34828650376     |
| NM_030801    | MAGED4B   | 2449 | 2547 | 5.93324901203     |
| NM_030801    | MAGED4B   | 1959 | 2065 | 6.93324901203     |

|           |         |      |      |               |
|-----------|---------|------|------|---------------|
| NM_030801 | MAGED4B | 1399 | 1504 | 5.34828651131 |
| NM_030801 | MAGED4B | 139  | 191  | 4.34827978025 |
| NM_030801 | MAGED4B | 212  | 330  | 6.34828651131 |
| NM_030801 | MAGED4B | 1792 | 1852 | 4.26414730192 |
| NM_030805 | LMAN2L  | 1329 | 1388 | 4.82347091612 |
| NM_030805 | LMAN2L  | 394  | 439  | 5.82748178524 |
| NM_030805 | LMAN2L  | 53   | 121  | 7.14941661096 |
| NM_030805 | LMAN2L  | 440  | 509  | 6.41245101702 |
| NM_030805 | LMAN2L  | 1972 | 2045 | 6.82748850875 |
| NM_030805 | LMAN2L  | 1167 | 1280 | 7.14941661118 |
| NM_030805 | LMAN2L  | 1589 | 1681 | 6.41245101679 |
| NM_030805 | LMAN2L  | 1523 | 1583 | 4.82347091612 |
| NM_030805 | LMAN2L  | 691  | 754  | 6.41244428596 |
| NM_030805 | LMAN2L  | 892  | 1068 | 8.14941661118 |
| NM_007375 | TARDBP  | 1887 | 1943 | 5.60001318482 |
| NM_007375 | TARDBP  | 1346 | 1418 | 4.60001318483 |
| NM_007375 | TARDBP  | 1662 | 1715 | 5.92194127971 |
| NM_007375 | TARDBP  | 258  | 356  | 5.60001318483 |
| NM_007375 | TARDBP  | 1035 | 1112 | 4.60001294891 |
| NM_007375 | TARDBP  | 2230 | 2309 | 5.92194127972 |
| NM_007375 | TARDBP  | 2671 | 2712 | 5.18497568533 |
| NM_007375 | TARDBP  | 1457 | 1514 | 3.60001317728 |
| NM_007375 | TARDBP  | 2714 | 2760 | 3.59599558466 |
| NM_007375 | TARDBP  | 2340 | 2421 | 4.60001317728 |
| NM_007375 | TARDBP  | 1979 | 2030 | 3.59599558466 |
| NM_007375 | TARDBP  | 1751 | 1791 | 3.51587397545 |
| NM_007375 | TARDBP  | 465  | 722  | 7.40736810689 |
| NM_007375 | TARDBP  | 2447 | 2615 | 7.92194127972 |
| NM_007375 | TARDBP  | 901  | 989  | 3.60001317728 |
| NM_007375 | TARDBP  | 116  | 228  | 6.40736810689 |
| NM_007375 | TARDBP  | 1253 | 1341 | 4.60001318482 |
| NM_007375 | TARDBP  | 2090 | 2229 | 5.60001318483 |
| NM_004627 | WRB     | 721  | 786  | 3.15102482401 |
| NM_004627 | WRB     | 329  | 406  | 5.73599405579 |
| NM_004627 | WRB     | 642  | 704  | 4.15103155507 |
| NM_004627 | WRB     | 120  | 197  | 4.73599405578 |
| NM_004627 | WRB     | 458  | 537  | 5.47295964241 |
| NM_004627 | WRB     | 830  | 893  | 5.15102482401 |
| NM_004627 | WRB     | 542  | 634  | 5.47295964996 |
| NM_004336 | BUB1    | 196  | 239  | 6.57204875719 |
| NM_004336 | BUB1    | 2248 | 2352 | 9.46354288863 |
| NM_004336 | BUB1    | 1247 | 1313 | 7.65618796657 |
| NM_004336 | BUB1    | 665  | 708  | 8.23713286712 |
| NM_004336 | BUB1    | 3200 | 3268 | 8.65601421625 |
| NM_004336 | BUB1    | 1543 | 1606 | 8.24097671697 |
| NM_004336 | BUB1    | 350  | 416  | 6.65618773065 |
| NM_004336 | BUB1    | 2681 | 2745 | 8.65618796657 |
| NM_004336 | BUB1    | 527  | 610  | 6.65618773065 |
| NM_004336 | BUB1    | 2864 | 2956 | 7.65618796657 |
| NM_004336 | BUB1    | 3367 | 3433 | 7.65618123552 |

|              |         |      |      |                |
|--------------|---------|------|------|----------------|
| NM_004336    | BUB1    | 1811 | 1887 | 6.65618795902  |
| NM_004336    | BUB1    | 1318 | 1393 | 6.65601421625  |
| NM_004336    | BUB1    | 3032 | 3107 | 8.65618123552  |
| NM_004336    | BUB1    | 821  | 910  | 8.24115023137  |
| NM_004336    | BUB1    | 2003 | 2077 | 8.97811606146  |
| NM_004622    | TSN     | 610  | 680  | 6.99910493834  |
| NM_004622    | TSN     | 2437 | 2517 | 5.67717684345  |
| NM_004622    | TSN     | 883  | 950  | 5.67315924328  |
| NM_004622    | TSN     | 683  | 782  | 6.67717684345  |
| NM_004622    | TSN     | 2748 | 2787 | 4.59303763407  |
| NM_004622    | TSN     | 543  | 605  | 6.67717684345  |
| NM_004622    | TSN     | 2825 | 2881 | 4.59303763407  |
| NM_004622    | TSN     | 793  | 883  | 6.26213934418  |
| NM_004622    | TSN     | 186  | 358  | 7.8471018449   |
| NM_004622    | TSN     | 366  | 517  | 7.67717684345  |
| NM_004622    | TSN     | 1145 | 1271 | 7.67717684345  |
| NM_004620    | TRAF6   | 4629 | 4690 | 9.13034947162  |
| NM_001001563 | TIMM50  | 1002 | 1067 | 7.17183415184  |
| NM_001001563 | TIMM50  | 1224 | 1294 | 6.58687165112  |
| NM_001001563 | TIMM50  | 1768 | 1822 | 5.5866979008   |
| NM_001001563 | TIMM50  | 1483 | 1514 | 4.58285405095  |
| NM_001001563 | TIMM50  | 634  | 775  | 7.90879974601  |
| NM_001001563 | TIMM50  | 939  | 999  | 4.5866979008   |
| NM_001001563 | TIMM50  | 1121 | 1206 | 7.39422657318  |
| NM_001001563 | TIMM50  | 781  | 882  | 7.39422657318  |
| NM_001001563 | TIMM50  | 1299 | 1406 | 6.17183391592  |
| NM_004339    | PTTG1IP | 1952 | 2011 | 0.738253882469 |
| NM_004339    | PTTG1IP | 644  | 707  | 0.738080132157 |
| NM_004339    | PTTG1IP | 2013 | 2054 | 2.23907717381  |
| NM_004339    | PTTG1IP | 217  | 300  | 3.3232163832   |
| NM_004339    | PTTG1IP | 378  | 467  | 4.19768550111  |
| NM_004339    | PTTG1IP | 311  | 370  | 1.73808013216  |
| NM_004339    | PTTG1IP | 715  | 845  | 2.3232163832   |
| NM_004339    | PTTG1IP | 1141 | 1256 | 2.3232163832   |
| NM_004339    | PTTG1IP | 2122 | 2479 | 5.26181583853  |
| NM_004339    | PTTG1IP | 909  | 1136 | 5.69245019286  |
| NM_004339    | PTTG1IP | 2485 | 2774 | 4.90817888392  |
| NM_004339    | PTTG1IP | 1534 | 1649 | 3.06018197736  |
| NM_004339    | PTTG1IP | 1263 | 1404 | 2.3232163832   |
| NM_004339    | PTTG1IP | 470  | 627  | 4.73825388247  |
| NM_001195555 | CLINT1  | 1801 | 1912 | 6.49688474847  |
| NM_001195555 | CLINT1  | 3227 | 3281 | 4.17494992253  |
| NM_001195555 | CLINT1  | 1227 | 1278 | 4.17478290326  |
| NM_001195555 | CLINT1  | 347  | 434  | 4.17093905341  |
| NM_001195555 | CLINT1  | 2445 | 2623 | 6.7599191543   |
| NM_001195555 | CLINT1  | 472  | 550  | 5.75590155413  |
| NM_001195555 | CLINT1  | 1923 | 2110 | 7.49688474847  |
| NM_001195555 | CLINT1  | 1458 | 1581 | 7.34488165502  |
| NM_004629    | FANCG   | 996  | 1046 | 8.73504457727  |
| NM_004629    | FANCG   | 2521 | 2598 | 8.73905544639  |

|              |                |      |      |                 |
|--------------|----------------|------|------|-----------------|
| NM_004629    | FANCG          | 1481 | 1533 | 8.73905544639   |
| NM_004629    | FANCG          | 2435 | 2499 | 9.73906194152   |
| NM_004629    | FANCG          | 2276 | 2431 | 9.73906217744   |
| NM_001199355 | RPL17-C180RF32 | 12   | 60   | 3.39252538566   |
| NM_001199355 | RPL17-C180RF32 | 543  | 608  | 4.39252537833   |
| NM_001199355 | RPL17-C180RF32 | 971  | 1022 | 3.39252514996   |
| NM_001199355 | RPL17-C180RF32 | 202  | 501  | 6.9774878866    |
| NM_001199355 | RPL17-C180RF32 | 687  | 793  | 2.80756288516   |
| NM_001199355 | RPL17-C180RF32 | 799  | 864  | 3.38850778571   |
| NM_001199355 | RPL17-C180RF32 | 73   | 200  | 4.61491780722   |
| NM_022965    | FGFR3          | 1776 | 1878 | 6.39895587622   |
| NM_022965    | FGFR3          | 873  | 963  | 4.8139933755    |
| NM_022965    | FGFR3          | 1263 | 1303 | 3.81399336795   |
| NM_022965    | FGFR3          | 2841 | 2906 | 4.81399336795   |
| NM_022965    | FGFR3          | 2316 | 2374 | 4.72985416612   |
| NM_022965    | FGFR3          | 2452 | 2497 | 4.8139933755    |
| NM_022965    | FGFR3          | 2530 | 2593 | 3.81399313958   |
| NM_022965    | FGFR3          | 2910 | 2970 | 5.81399336795   |
| NM_022965    | FGFR3          | 789  | 850  | 3.81399337549   |
| NM_022965    | FGFR3          | 474  | 583  | 5.39895587622   |
| NM_022965    | FGFR3          | 1888 | 2050 | 5.8139933755    |
| NM_022965    | FGFR3          | 3643 | 3807 | 7.27342499414   |
| NM_022965    | FGFR3          | 1396 | 1523 | 6.62134829756   |
| NM_022965    | FGFR3          | 2140 | 2283 | 6.39895587622   |
| NM_022965    | FGFR3          | 3196 | 3299 | 4.81399336795   |
| NM_022965    | FGFR3          | 1584 | 1686 | 3.81399337549   |
| NM_022965    | FGFR3          | 1200 | 1262 | 4.81399336795   |
| NM_022965    | FGFR3          | 3436 | 3542 | 6.62134829756   |
| NM_022965    | FGFR3          | 594  | 753  | 6.8139933755    |
| NM_001037283 | EIF3B          | 2234 | 2329 | 5.34216843823   |
| NM_001037283 | EIF3B          | 2607 | 2744 | 6.41255776613   |
| NM_001037283 | EIF3B          | 3013 | 3071 | 3.0202403358    |
| NM_001037283 | EIF3B          | 2357 | 2552 | 5.8275952654    |
| NM_001037283 | EIF3B          | 2775 | 2987 | 6.60520284407   |
| NM_001037283 | EIF3B          | 11   | 143  | 3.60520284407   |
| NM_001037283 | EIF3B          | 391  | 726  | 6.72068006149   |
| NM_001037283 | EIF3B          | 738  | 1141 | 7.77512784551   |
| NM_001037283 | EIF3B          | 247  | 313  | 2.01622274317   |
| NM_001037283 | EIF3B          | 1203 | 2234 | 8.8146562097    |
| NM_001011    | RPS7           | 12   | 98   | -0.798085535083 |
| NM_001011    | RPS7           | 106  | 704  | 3.95680197463   |
| NM_020524    | PBXIP1         | 2305 | 2359 | 8.72487392146   |
| NM_020524    | PBXIP1         | 283  | 359  | 8.30983641485   |
| NM_020524    | PBXIP1         | 2001 | 2075 | 7.72486719063   |
| NM_020524    | PBXIP1         | 2771 | 2850 | 7.72487392168   |
| NM_020524    | PBXIP1         | 1937 | 1992 | 7.6407347123    |
| NM_020524    | PBXIP1         | 211  | 253  | 6.6407347123    |
| NM_020524    | PBXIP1         | 1253 | 1319 | 6.72085632151   |
| NM_016474    | C3orf19        | 62   | 123  | 5.49289209891   |
| NM_016476    | ANAPC11        | 566  | 608  | 5.0018239662    |

|              |           |      |      |                    |
|--------------|-----------|------|------|--------------------|
| NM_016476    | ANAPC11   | 166  | 329  | 6.73878956791      |
| NM_016476    | ANAPC11   | 53   | 130  | 5.00182397375      |
| NM_016470    | C20orf111 |      | 416  | 523 4.69876993183  |
| NM_016470    | C20orf111 |      | 925  | 1078 7.86869516919 |
| NM_016472    | C14orf129 |      | 735  | 856 7.54462202123  |
| NM_016472    | C14orf129 |      | 135  | 216 6.54461529017  |
| NM_016479    | SHISA5    | 2038 | 2088 | 8.13702553647      |
| NM_016479    | SHISA5    | 181  | 212  | 8.13701880542      |
| NM_016479    | SHISA5    | 1232 | 1276 | 6.46792382637      |
| NM_016479    | SHISA5    | 1524 | 1569 | 8.13702530055      |
| NM_016479    | SHISA5    | 995  | 1117 | 10.2525027539      |
| NM_016479    | SHISA5    | 269  | 366  | 9.55206303575      |
| NM_016479    | SHISA5    | 834  | 938  | 8.55206303575      |
| NM_016479    | SHISA5    | 461  | 557  | 9.35941795781      |
| NM_016479    | SHISA5    | 1756 | 1884 | 6.55206303575      |
| NM_016479    | SHISA5    | 1674 | 1756 | 6.55206303553      |
| NM_016478    | ZC3HC1    | 823  | 862  | 8.68173618694      |
| NM_016478    | ZC3HC1    | 1850 | 1941 | 8.67772531782      |
| NM_016478    | ZC3HC1    | 650  | 710  | 8.59760370861      |
| NM_016478    | ZC3HC1    | 1610 | 1681 | 7.68173618694      |
| NM_172210    | CSF1      | 1691 | 1734 | 8.37508306071      |
| NM_172210    | CSF1      | 995  | 1037 | 8.29094385133      |
| NM_172210    | CSF1      | 1574 | 1613 | 9.37508282479      |
| NM_172210    | CSF1      | 740  | 831  | 10.3750830607      |
| NM_172210    | CSF1      | 1061 | 1113 | 8.37507632966      |
| NM_172210    | CSF1      | 449  | 653  | 12.2819736563      |
| NM_172210    | CSF1      | 873  | 922  | 9.37508305316      |
| NM_001078645 | CDC16     | 1750 | 1809 | 5.52427388289      |
| NM_001078645 | CDC16     | 1502 | 1554 | 4.52043003303      |
| NM_001078645 | CDC16     | 2120 | 2189 | 4.5244476332       |
| NM_001078645 | CDC16     | 1591 | 1675 | 4.52444762565      |
| NM_001078645 | CDC16     | 1300 | 1370 | 7.69437263442      |
| NM_001078645 | CDC16     | 828  | 968  | 6.84637572809      |
| NM_001078645 | CDC16     | 614  | 653  | 6.10539253375      |
| NM_001078645 | CDC16     | 1873 | 1969 | 4.5244476332       |
| NM_001136574 | LANCL1    | 1119 | 1201 | 5.42132746848      |
| NM_015323    | UFL1      | 1779 | 1850 | 4.97236223893      |
| NM_015323    | UFL1      | 1124 | 1189 | 6.05248384814      |
| NM_015323    | UFL1      | 612  | 672  | 4.97236223893      |
| NM_015323    | UFL1      | 517  | 572  | 4.05650121239      |
| NM_015323    | UFL1      | 2302 | 2355 | 4.056327698        |
| NM_015323    | UFL1      | 672  | 800  | 6.37842954298      |
| NM_015323    | UFL1      | 1925 | 2005 | 6.86385637037      |
| NM_015323    | UFL1      | 2030 | 2115 | 5.05649471726      |
| NM_145257    | C1orf96   | 484  | 541  | 5.89155572565      |
| NM_006667    | PGRMC1    | 358  | 406  | 6.98796355853      |
| NM_006667    | PGRMC1    | 1289 | 1396 | 6.98796355875      |
| NM_006667    | PGRMC1    | 1245 | 1289 | 6.90382434937      |
| NM_006667    | PGRMC1    | 1800 | 1856 | 7.98796355875      |
| NM_006667    | PGRMC1    | 107  | 272  | 9.40300105803      |



|           |        |      |      |               |
|-----------|--------|------|------|---------------|
| NM_006667 | PGRMC1 | 750  | 784  | 5.31886184864 |
| NM_006667 | PGRMC1 | 495  | 704  | 9.79531848081 |
| NM_006667 | PGRMC1 | 1066 | 1168 | 7.98796355875 |
| NM_006667 | PGRMC1 | 865  | 987  | 8.21035598009 |
| NM_006667 | PGRMC1 | 54   | 98   | 5.40282730771 |
| NM_006667 | PGRMC1 | 411  | 482  | 5.40300105803 |
| NM_006667 | PGRMC1 | 1633 | 1745 | 5.40299432698 |
| NM_006666 | RUVBL2 | 1047 | 1098 | 6.46569322816 |
| NM_006666 | RUVBL2 | 1139 | 1216 | 5.46569323571 |
| NM_006666 | RUVBL2 | 445  | 497  | 7.05065573643 |
| NM_006666 | RUVBL2 | 916  | 1007 | 7.7876213306  |
| NM_006666 | RUVBL2 | 34   | 91   | 5.46569323571 |
| NM_006666 | RUVBL2 | 1375 | 1423 | 6.4655194854  |
| NM_006666 | RUVBL2 | 880  | 909  | 7.04663813626 |
| NM_006666 | RUVBL2 | 598  | 684  | 6.46569322816 |
| NM_145252 | ZG16B  | 347  | 383  | 9.57924845292 |
| NM_006660 | CLPX   | 510  | 561  | 2.41465013196 |
| NM_006660 | CLPX   | 173  | 218  | 3.49477174117 |
| NM_006660 | CLPX   | 1796 | 1889 | 3.49878934134 |
| NM_006660 | CLPX   | 1381 | 1431 | 2.41465013196 |
| NM_145702 | TIGD1  | 875  | 911  | 7.91290791383 |
| NM_006662 | SRCAP  | 1994 | 2042 | 5.9799674371  |
| NM_006662 | SRCAP  | 3551 | 3618 | 5.9799674371  |
| NM_006662 | SRCAP  | 6642 | 6726 | 8.56510368814 |
| NM_006662 | SRCAP  | 8112 | 8201 | 8.78749610947 |
| NM_006662 | SRCAP  | 9311 | 9393 | 7.56510368814 |
| NM_006662 | SRCAP  | 8310 | 8365 | 5.98014118719 |
| NM_006662 | SRCAP  | 6217 | 6311 | 7.56510368814 |
| NM_006662 | SRCAP  | 3052 | 3116 | 5.97612358724 |
| NM_006662 | SRCAP  | 1755 | 1828 | 6.98014118742 |
| NM_006662 | SRCAP  | 5500 | 5556 | 7.56510368791 |
| NM_006662 | SRCAP  | 6866 | 6911 | 6.97612358724 |
| NM_006662 | SRCAP  | 5678 | 5739 | 7.9799674371  |
| NM_006662 | SRCAP  | 3219 | 3257 | 5.89600197803 |
| NM_006662 | SRCAP  | 1210 | 1261 | 6.9799674371  |
| NM_006662 | SRCAP  | 6022 | 6060 | 6.97612358724 |
| NM_006662 | SRCAP  | 9635 | 9668 | 5.89600197803 |
| NM_006662 | SRCAP  | 7931 | 8004 | 9.3020692823  |
| NM_006662 | SRCAP  | 2102 | 2156 | 6.98014118741 |
| NM_006662 | SRCAP  | 7854 | 7918 | 6.98014118742 |
| NM_006662 | SRCAP  | 2721 | 2756 | 5.97612358724 |
| NM_006662 | SRCAP  | 5394 | 5463 | 5.98013445636 |
| NM_006662 | SRCAP  | 4015 | 4076 | 6.98014117987 |
| NM_006662 | SRCAP  | 5572 | 5637 | 6.98013445636 |
| NM_006662 | SRCAP  | 8615 | 8693 | 7.56510368814 |
| NM_006662 | SRCAP  | 4626 | 4824 | 9.88703178302 |
| NM_006662 | SRCAP  | 6743 | 6810 | 5.98014118742 |
| NM_006662 | SRCAP  | 6067 | 6217 | 6.98014118742 |
| NM_006662 | SRCAP  | 6399 | 6549 | 9.15006618886 |
| NM_006662 | SRCAP  | 5267 | 5376 | 8.56510368814 |

|           |        |      |      |               |
|-----------|--------|------|------|---------------|
| NM_006662 | SRCAP  | 785  | 869  | 7.98014118719 |
| NM_006662 | SRCAP  | 9416 | 9513 | 7.98014118742 |
| NM_006662 | SRCAP  | 5844 | 5965 | 7.98014118742 |
| NM_006662 | SRCAP  | 4299 | 4405 | 6.98014118741 |
| NM_006662 | SRCAP  | 6994 | 7096 | 5.98014118742 |
| NM_006662 | SRCAP  | 7105 | 7186 | 7.56510368791 |
| NM_006662 | SRCAP  | 2539 | 2689 | 7.98014118742 |
| NM_006662 | SRCAP  | 974  | 1173 | 8.56510368814 |
| NM_006662 | SRCAP  | 4887 | 5267 | 9.98014118742 |
| NM_138821 | PAM    | 2291 | 2355 | 6.85993553542 |
| NM_138821 | PAM    | 2856 | 2930 | 6.85993553542 |
| NM_138821 | PAM    | 3042 | 3144 | 6.85993553542 |
| NM_138821 | PAM    | 1932 | 1990 | 5.53800744053 |
| NM_138821 | PAM    | 575  | 610  | 5.53398984036 |
| NM_138821 | PAM    | 807  | 852  | 6.53800743298 |
| NM_138821 | PAM    | 1515 | 1569 | 4.53398984036 |
| NM_138821 | PAM    | 387  | 457  | 5.53398984036 |
| NM_138821 | PAM    | 1118 | 1228 | 7.12296994125 |
| NM_138821 | PAM    | 2403 | 2529 | 7.34536236259 |
| NM_138821 | PAM    | 2159 | 2210 | 4.53398984036 |
| NM_138821 | PAM    | 867  | 1043 | 7.99743905917 |
| NM_138821 | PAM    | 1336 | 1470 | 5.53800744053 |
| NM_138821 | PAM    | 1630 | 1930 | 8.23844715867 |
| NM_138821 | PAM    | 704  | 792  | 6.53800744053 |
| NM_138820 | HIGD2A | 299  | 369  | 8.6151752935  |
| NM_138820 | HIGD2A | 464  | 553  | 8.61517530105 |
| NM_138820 | HIGD2A | 11   | 64   | 8.02619520016 |
| NM_002969 | MAPK12 | 1154 | 1193 | 6.17422245196 |
| NM_002969 | MAPK12 | 391  | 459  | 6.17438947122 |
| NM_002748 | MAPK6  | 1267 | 1324 | 3.64595749531 |
| NM_002748 | MAPK6  | 3940 | 4010 | 2.64595749531 |
| NM_002748 | MAPK6  | 2584 | 2651 | 4.1467875177  |
| NM_002748 | MAPK6  | 351  | 404  | 4.22690912691 |
| NM_002748 | MAPK6  | 4141 | 4196 | 3.64595749531 |
| NM_002748 | MAPK6  | 992  | 1021 | 3.64194662619 |
| NM_002748 | MAPK6  | 157  | 281  | 4.23092672708 |
| NM_002748 | MAPK6  | 1427 | 1491 | 4.23092672686 |
| NM_002746 | MAPK3  | 408  | 493  | 7.03498563192 |
| NM_002746 | MAPK3  | 1268 | 1311 | 7.61977438988 |
| NM_002746 | MAPK3  | 979  | 1038 | 6.03498563947 |
| NM_002744 | PRKCZ  | 810  | 865  | 4.67551141559 |
| NM_002744 | PRKCZ  | 1010 | 1072 | 6.75965038905 |
| NM_002744 | PRKCZ  | 260  | 317  | 6.34460639464 |
| NM_002744 | PRKCZ  | 711  | 798  | 5.75965062497 |
| NM_002961 | S100A4 | 213  | 345  | 10.9906974813 |
| NM_002743 | PRKCSH | 225  | 351  | 6.34401524744 |
| NM_002743 | PRKCSH | 1202 | 1258 | 3.84151490691 |
| NM_002743 | PRKCSH | 353  | 530  | 6.57848050107 |
| NM_002743 | PRKCSH | 1951 | 2057 | 5.57848050107 |
| NM_002743 | PRKCSH | 754  | 1056 | 7.21074871657 |

|              |          |      |      |               |               |
|--------------|----------|------|------|---------------|---------------|
| NM_002743    | PRKCSH   | 0    | 225  | 7.06390732824 |               |
| NM_002743    | PRKCSH   | 1265 | 1905 | 8.34401524744 |               |
| NM_002743    | PRKCSH   | 536  | 751  | 6.25655240619 |               |
| NM_002740    | PRKCI    | 1283 | 1325 | 5.92317867537 |               |
| NM_002740    | PRKCI    | 1101 | 1155 | 5.92317867537 |               |
| NM_002740    | PRKCI    | 910  | 955  | 5.91933482551 |               |
| NM_031444    | C22orf13 |      | 2073 | 2125          | 5.00747705422 |
| NM_031444    | C22orf13 |      | 960  | 1002          | 4.92735544501 |
| NM_031444    | C22orf13 |      | 2919 | 2959          | 6.00747705422 |
| NM_031444    | C22orf13 |      | 358  | 424           | 6.59645042406 |
| NM_031444    | C22orf13 |      | 1108 | 1203          | 6.59645715489 |
| NM_031444    | C22orf13 |      | 3038 | 3119          | 5.01149464684 |
| NM_031444    | C22orf13 |      | 567  | 650           | 6.01132090407 |
| NM_031444    | C22orf13 |      | 428  | 556           | 7.01149465439 |
| NM_024602    | HECTD3   | 2058 | 2107 | 7.39215657385 |               |
| NM_024602    | HECTD3   | 1044 | 1080 | 7.39198282376 |               |
| NM_024602    | HECTD3   | 654  | 732  | 6.39214984302 |               |
| NM_024602    | HECTD3   | 383  | 439  | 6.3881389739  |               |
| NM_024604    | RPAP3    | 2184 | 2253 | 4.22686478711 |               |
| NM_024604    | RPAP3    | 1745 | 1794 | 5.31100398894 |               |
| NM_001085425 | ARSA     | 465  | 534  | 10.0940123189 |               |
| NM_001085425 | ARSA     | 156  | 192  | 9.50904308709 |               |
| NM_001085425 | ARSA     | 1114 | 1195 | 8.50904981814 |               |
| NM_001085425 | ARSA     | 1435 | 1504 | 9.50904308709 |               |
| NM_001085425 | ARSA     | 914  | 976  | 8.42491060876 |               |
| NM_001085425 | ARSA     | 706  | 787  | 9.50904308709 |               |
| NM_001085425 | ARSA     | 1515 | 1607 | 8.50904981814 |               |
| NM_031229    | RBCK1    | 1664 | 1711 | 5.65666314765 |               |
| NM_031229    | RBCK1    | 2684 | 2736 | 5.65666314032 |               |
| NM_031229    | RBCK1    | 1927 | 2006 | 5.65666314787 |               |
| NM_031229    | RBCK1    | 1807 | 1904 | 6.24162564859 |               |
| NM_031229    | RBCK1    | 2407 | 2451 | 5.65666314787 |               |
| NM_031229    | RBCK1    | 396  | 490  | 7.46401806993 |               |
| NM_031229    | RBCK1    | 676  | 737  | 4.65666314787 |               |
| NM_031229    | RBCK1    | 1714 | 1785 | 5.65666314787 |               |
| NM_031229    | RBCK1    | 925  | 1027 | 7.24162564859 |               |
| NM_031229    | RBCK1    | 1104 | 1198 | 6.65666314787 |               |
| NM_031229    | RBCK1    | 2272 | 2342 | 6.24162541267 |               |
| NM_031229    | RBCK1    | 2474 | 2667 | 6.97859124276 |               |
| NM_031229    | RBCK1    | 743  | 847  | 4.65666314787 |               |
| NM_031992    | EIF4H    | 1579 | 1622 | 3.62330997148 |               |
| NM_031992    | EIF4H    | 1634 | 1680 | 5.08274159011 |               |
| NM_031992    | EIF4H    | 0    | 60   | 4.43066489353 |               |
| NM_031992    | EIF4H    | 618  | 662  | 2.62330324042 |               |
| NM_031992    | EIF4H    | 812  | 1007 | 6.01562739425 |               |
| NM_031992    | EIF4H    | 1449 | 1531 | 2.62330973556 |               |
| NM_031992    | EIF4H    | 499  | 616  | 2.62330997148 |               |
| NM_031992    | EIF4H    | 1024 | 1293 | 6.43066489353 |               |
| NM_031992    | EIF4H    | 1682 | 1951 | 6.26716616125 |               |
| NM_031992    | EIF4H    | 2053 | 2253 | 5.87123748492 |               |

|              |         |      |      |               |
|--------------|---------|------|------|---------------|
| NM_031992    | EIF4H   | 159  | 431  | 6.32374968962 |
| NM_031992    | EIF4H   | 1953 | 2022 | 1.62330324042 |
| NM_031992    | EIF4H   | 2285 | 2456 | 4.43066489353 |
| NM_006088    | TUBB2C  | 198  | 249  | 5.10600751125 |
| NM_006088    | TUBB2C  | 652  | 800  | 8.10600751125 |
| NM_006088    | TUBB2C  | 1063 | 1092 | 4.10583376093 |
| NM_006088    | TUBB2C  | 45   | 94   | 6.69097001197 |
| NM_006088    | TUBB2C  | 1122 | 1185 | 6.69097001197 |
| NM_006088    | TUBB2C  | 291  | 511  | 8.49832493403 |
| NM_006088    | TUBB2C  | 940  | 1049 | 5.69097001197 |
| NM_006088    | TUBB2C  | 556  | 651  | 6.69097001197 |
| NM_006088    | TUBB2C  | 1403 | 1573 | 6.9133624333  |
| NM_006088    | TUBB2C  | 1263 | 1368 | 5.69097001197 |
| NM_006088    | TUBB2C  | 836  | 923  | 6.10600751125 |
| NM_178517    | PIGW    | 264  | 340  | 10.1101627665 |
| NM_178517    | PIGW    | 1407 | 1463 | 10.1101627665 |
| NM_178517    | PIGW    | 467  | 526  | 9.11016253061 |
| NM_178517    | PIGW    | 862  | 900  | 8.02602355715 |
| NM_178517    | PIGW    | 1530 | 1608 | 10.1101627665 |
| NM_178517    | PIGW    | 712  | 772  | 9.6951185362  |
| NM_178517    | PIGW    | 1175 | 1244 | 9.11016275898 |
| NM_178517    | PIGW    | 1907 | 1960 | 8.10614516636 |
| NM_178517    | PIGW    | 1085 | 1158 | 9.6951252597  |
| NM_178517    | PIGW    | 652  | 708  | 9.11016275898 |
| NM_178517    | PIGW    | 1250 | 1307 | 9.6951185362  |
| NM_178517    | PIGW    | 121  | 185  | 8.11016276653 |
| NM_178517    | PIGW    | 538  | 636  | 9.11016276653 |
| NM_178517    | PIGW    | 1031 | 1082 | 8.11015603548 |
| NM_178517    | PIGW    | 1307 | 1390 | 10.110162759  |
| NM_178517    | PIGW    | 341  | 411  | 8.11015603548 |
| NM_001122681 | SH3BP2  | 4518 | 4557 | 7.03455607677 |
| NM_001122681 | SH3BP2  | 1666 | 1716 | 7.03455607677 |
| NM_006082    | TUBA1B  | 1130 | 1220 | 7.530674473   |
| NM_006082    | TUBA1B  | 1223 | 1732 | 9.87306667045 |
| NM_006082    | TUBA1B  | 144  | 1128 | 11.2071353282 |
| NM_006085    | BPNT1   | 1174 | 1227 | 5.82618749454 |
| NM_006085    | BPNT1   | 492  | 546  | 8.14811535351 |
| NM_006085    | BPNT1   | 1982 | 2019 | 5.82601374423 |
| NM_006085    | BPNT1   | 70   | 168  | 7.82618749454 |
| NM_006085    | BPNT1   | 775  | 835  | 7.41114999526 |
| NM_006085    | BPNT1   | 175  | 222  | 5.82618076349 |
| NM_006085    | BPNT1   | 237  | 351  | 8.82618749454 |
| NM_006085    | BPNT1   | 972  | 1083 | 7.82618749454 |
| NM_178518    | TMEM102 | 645  | 691  | 10.8647688528 |
| NM_178518    | TMEM102 | 782  | 834  | 10.8647688528 |
| NM_003566    | EEA1    | 4948 | 5047 | 4.30482732361 |
| NM_003566    | EEA1    | 6275 | 6355 | 5.88978983187 |
| NM_003566    | EEA1    | 7892 | 7984 | 5.30482733116 |
| NM_003566    | EEA1    | 6154 | 6239 | 5.88978983188 |
| NM_003566    | EEA1    | 965  | 1025 | 6.62675542604 |

|              |        |      |      |               |
|--------------|--------|------|------|---------------|
| NM_003566    | EEA1   | 7426 | 7475 | 5.22068812177 |
| NM_003566    | EEA1   | 5062 | 5119 | 4.3048206001  |
| NM_003566    | EEA1   | 4090 | 4130 | 4.22068812177 |
| NM_003566    | EEA1   | 1757 | 1831 | 5.88978959596 |
| NM_003566    | EEA1   | 2313 | 2392 | 5.30080973098 |
| NM_003566    | EEA1   | 5914 | 5968 | 5.8857722317  |
| NM_003566    | EEA1   | 5410 | 5485 | 7.11218225321 |
| NM_003566    | EEA1   | 6663 | 6745 | 5.88978310082 |
| NM_003566    | EEA1   | 4545 | 4611 | 4.30482733115 |
| NM_003566    | EEA1   | 824  | 875  | 5.30080973098 |
| NM_003566    | EEA1   | 7662 | 7743 | 5.30482732361 |
| NM_003566    | EEA1   | 4628 | 4712 | 6.30482733116 |
| NM_003566    | EEA1   | 4002 | 4081 | 4.30482732361 |
| NM_003566    | EEA1   | 6489 | 6543 | 5.30482733115 |
| NM_003566    | EEA1   | 402  | 477  | 5.3048206001  |
| NM_003566    | EEA1   | 1962 | 2050 | 4.30465358084 |
| NM_003566    | EEA1   | 1909 | 1958 | 4.30080973098 |
| NM_003566    | EEA1   | 7484 | 7536 | 4.22068812177 |
| NM_003566    | EEA1   | 4383 | 4424 | 5.30080973098 |
| NM_003566    | EEA1   | 268  | 377  | 6.30482733115 |
| NM_003566    | EEA1   | 883  | 963  | 4.30482709524 |
| NM_003566    | EEA1   | 7759 | 7837 | 5.88978310082 |
| NM_003566    | EEA1   | 5119 | 5266 | 5.88978983188 |
| NM_001007257 | PRDM2  | 1250 | 1303 | 9.21455223177 |
| NM_001007257 | PRDM2  | 3065 | 3136 | 8.21856959602 |
| NM_001007257 | PRDM2  | 5010 | 5085 | 9.79951473249 |
| NM_001145724 | HOMER3 | 472  | 547  | 9.67526487535 |
| NM_001145724 | HOMER3 | 141  | 192  | 9.26022064524 |
| NM_001145724 | HOMER3 | 1171 | 1272 | 10.6752648756 |
| NM_001145724 | HOMER3 | 726  | 793  | 7.67526486803 |
| NM_001145724 | HOMER3 | 247  | 371  | 9.2602273763  |
| NM_001145724 | HOMER3 | 937  | 1029 | 7.67526487558 |
| NM_001007259 | SETD4  | 685  | 722  | 8.69672475504 |
| NM_001145794 | ANTXR2 | 2090 | 2156 | 8.53375795998 |
| NM_001145794 | ANTXR2 | 1187 | 1232 | 9.11854671793 |
| NM_001145794 | ANTXR2 | 1257 | 1321 | 8.53358421721 |
| NM_001145794 | ANTXR2 | 1069 | 1113 | 9.53358421721 |
| NM_001145794 | ANTXR2 | 871  | 1015 | 10.1187204683 |
| NM_001145794 | ANTXR2 | 1447 | 1543 | 9.11872046803 |
| NM_001145794 | ANTXR2 | 1923 | 1995 | 9.11872023233 |
| NM_014235    | UBL4A  | 2187 | 2256 | 7.73223429074 |
| NM_014235    | UBL4A  | 505  | 569  | 8.73223429074 |
| NM_014235    | UBL4A  | 227  | 306  | 10.138301595  |
| NM_014236    | GNPAT  | 2154 | 2210 | 4.7833125735  |
| NM_014236    | GNPAT  | 2245 | 2322 | 4.78348632382 |
| NM_014236    | GNPAT  | 2029 | 2062 | 6.78347959276 |
| NM_014236    | GNPAT  | 1754 | 1837 | 6.36844882453 |
| NM_014236    | GNPAT  | 1177 | 1245 | 7.36844882454 |
| NM_014236    | GNPAT  | 1892 | 1935 | 5.78348632359 |
| NM_014236    | GNPAT  | 1046 | 1116 | 6.36844882454 |

|              |        |      |      |               |
|--------------|--------|------|------|---------------|
| NM_014236    | GNPAT  | 214  | 285  | 4.78348632382 |
| NM_014236    | GNPAT  | 664  | 997  | 8.69037691943 |
| NM_014236    | GNPAT  | 1323 | 1454 | 7.36844882454 |
| NM_014236    | GNPAT  | 1548 | 1661 | 6.78348632382 |
| NM_014230    | SRP68  | 1945 | 1983 | 4.32926496324 |
| NM_014230    | SRP68  | 2160 | 2212 | 3.32925846811 |
| NM_014230    | SRP68  | 1783 | 1818 | 4.91405394957 |
| NM_014230    | SRP68  | 1440 | 1501 | 4.32925846811 |
| NM_014230    | SRP68  | 1077 | 1118 | 3.24512598978 |
| NM_014230    | SRP68  | 1281 | 1350 | 4.32926519916 |
| NM_014230    | SRP68  | 2327 | 2378 | 3.32524759899 |
| NM_014230    | SRP68  | 1514 | 1546 | 3.32925846811 |
| NM_014230    | SRP68  | 2027 | 2082 | 4.32524759899 |
| NM_014230    | SRP68  | 517  | 598  | 4.32926519916 |
| NM_014230    | SRP68  | 1642 | 1745 | 4.32926519916 |
| NM_014230    | SRP68  | 910  | 1056 | 6.65119329405 |
| NM_014230    | SRP68  | 351  | 509  | 5.91422769988 |
| NM_014230    | SRP68  | 1158 | 1271 | 5.32926519916 |
| NM_014233    | UBTF   | 3361 | 3395 | 4.39604805941 |
| NM_014233    | UBTF   | 1908 | 1944 | 5.3159264502  |
| NM_014233    | UBTF   | 3175 | 3256 | 5.40006565959 |
| NM_014233    | UBTF   | 1843 | 1902 | 5.3159264502  |
| NM_014233    | UBTF   | 1145 | 1218 | 4.39989190927 |
| NM_014233    | UBTF   | 373  | 519  | 6.72199375447 |
| NM_014233    | UBTF   | 2289 | 2393 | 4.40006565959 |
| NM_014233    | UBTF   | 3277 | 3356 | 4.40005892853 |
| NM_014233    | UBTF   | 2435 | 2530 | 4.40006542367 |
| NM_014720    | SLK    | 443  | 473  | 5.21161204836 |
| NM_014720    | SLK    | 344  | 385  | 4.29173365757 |
| NM_014720    | SLK    | 226  | 276  | 5.29574452669 |
| NM_014720    | SLK    | 4644 | 4709 | 5.29173365757 |
| NM_014720    | SLK    | 125  | 192  | 5.29574452669 |
| NM_014720    | SLK    | 5190 | 5283 | 4.29575125774 |
| NM_014720    | SLK    | 3738 | 3822 | 5.29575102182 |
| NM_001143760 | EIF5A  | 801  | 850  | 3.03257085546 |
| NM_001143760 | EIF5A  | 1164 | 1242 | 2.61753335618 |
| NM_001143760 | EIF5A  | 656  | 790  | 5.03257085546 |
| NM_001143760 | EIF5A  | 123  | 396  | 6.28049836891 |
| NM_001143760 | EIF5A  | 885  | 1084 | 5.35449895035 |
| NM_001143760 | EIF5A  | 405  | 649  | 5.35449895035 |
| NM_152487    | TMEM56 | 1123 | 1160 | 10.8534931445 |
| NM_152487    | TMEM56 | 2236 | 2300 | 10.8536668948 |
| NM_152487    | TMEM56 | 813  | 874  | 11.2687043865 |
| NM_152487    | TMEM56 | 2462 | 2569 | 11.5906324889 |
| NM_152487    | TMEM56 | 761  | 812  | 10.2685306437 |
| NM_152487    | TMEM56 | 585  | 636  | 10.8536601637 |
| NM_152487    | TMEM56 | 887  | 987  | 12.0760593161 |
| NM_152487    | TMEM56 | 648  | 742  | 10.8536668948 |
| NM_152487    | TMEM56 | 1804 | 1899 | 9.26870439405 |
| NM_152487    | TMEM56 | 3823 | 3894 | 10.2685306437 |

|              |          |      |      |               |               |
|--------------|----------|------|------|---------------|---------------|
| NM_152487    | TMEM56   | 6032 | 6101 | 9.18456518467 |               |
| NM_014238    | KSR1     | 4197 | 4259 | 7.76862036867 |               |
| NM_006087    | TUBB4    | 1251 | 1274 | 7.84341701835 |               |
| NM_001007073 | RPL32    | 47   | 121  | 3.15772455243 |               |
| NM_001007073 | RPL32    | 190  | 389  | 4.92325929879 |               |
| NM_001007073 | RPL32    | 406  | 559  | 4.83579645754 |               |
| NM_001171948 | C19orf50 |      | 1377 | 1441          | 6.85582992879 |
| NM_001171948 | C19orf50 |      | 1467 | 1543          | 4.85582969287 |
| NM_001171948 | C19orf50 |      | 375  | 469           | 5.85582319773 |
| NM_001171948 | C19orf50 |      | 502  | 575           | 4.85582969287 |
| NM_001171948 | C19orf50 |      | 1220 | 1254          | 4.7716907194  |
| NM_001171948 | C19orf50 |      | 966  | 1113          | 7.44079242951 |
| NM_001171948 | C19orf50 |      | 792  | 840           | 4.7716907194  |
| NM_001171948 | C19orf50 |      | 1130 | 1180          | 4.7716907194  |
| NM_001171948 | C19orf50 |      | 236  | 374           | 5.85582992879 |
| NM_005488    | TOM1     | 813  | 904  | 5.66712994598 |               |
| NM_005488    | TOM1     | 1123 | 1167 | 6.24808157758 |               |
| NM_005488    | TOM1     | 987  | 1048 | 5.66696292671 |               |
| NM_005488    | TOM1     | 557  | 724  | 7.47449159909 |               |
| NM_001171946 | SUN1     | 48   | 234  | 8.55196877831 |               |
| NM_001171946 | SUN1     | 377  | 591  | 7.96700627759 |               |
| NM_001545    | ICT1     | 197  | 242  | 4.27081778901 |               |
| NM_001545    | ICT1     | 131  | 184  | 3.27081778901 |               |
| NM_001545    | ICT1     | 429  | 483  | 5.27081801738 |               |
| NM_032758    | PHF5A    | 121  | 181  | 5.60117244165 |               |
| NM_032758    | PHF5A    | 182  | 255  | 4.01620994093 |               |
| NM_032758    | PHF5A    | 707  | 753  | 2.93207073155 |               |
| NM_032758    | PHF5A    | 264  | 348  | 4.60099869133 |               |
| NM_032758    | PHF5A    | 586  | 692  | 3.01620994092 |               |
| NM_178167    | ZNF598   | 612  | 648  | 6.11432889412 |               |
| NM_178167    | ZNF598   | 2418 | 2451 | 6.19445050333 |               |
| NM_178167    | ZNF598   | 2537 | 2600 | 6.19846786758 |               |
| NM_178167    | ZNF598   | 696  | 774  | 8.52039619839 |               |
| NM_178167    | ZNF598   | 2496 | 2529 | 7.11432889412 |               |
| NM_178167    | ZNF598   | 3263 | 3324 | 7.19846137245 |               |
| NM_014901    | RNF44    | 3292 | 3340 | 6.63531514312 |               |
| NM_014901    | RNF44    | 3107 | 3160 | 7.631304274   |               |
| NM_014901    | RNF44    | 3557 | 3623 | 8.22028413897 |               |
| NM_014901    | RNF44    | 3455 | 3519 | 6.63531514312 |               |
| NM_014901    | RNF44    | 3644 | 3727 | 7.63532163825 |               |
| NM_014901    | RNF44    | 1479 | 1572 | 8.22028413897 |               |
| NM_152267    | RNF185   | 3017 | 3088 | 10.0531351535 |               |
| NM_152267    | RNF185   | 917  | 969  | 9.38403367928 |               |
| NM_152267    | RNF185   | 1564 | 1633 | 8.46799913835 |               |
| NM_152265    | BTF3L4   | 341  | 405  | 3.55870834185 |               |
| NM_152265    | BTF3L4   | 2846 | 2879 | 3.55870161834 |               |
| NM_014900    | COBLL1   | 2761 | 2837 | 6.13987861527 |               |
| NM_014900    | COBLL1   | 2362 | 2442 | 5.13987837935 |               |
| NM_014900    | COBLL1   | 3262 | 3336 | 4.13987861526 |               |
| NM_014900    | COBLL1   | 3879 | 3973 | 5.13987861527 |               |

|           |          |      |      |                    |
|-----------|----------|------|------|--------------------|
| NM_014900 | COBLL1   | 3516 | 3579 | 4.13987861527      |
| NM_014900 | COBLL1   | 1692 | 1734 | 4.13987837935      |
| NM_014900 | COBLL1   | 2248 | 2304 | 5.13586101509      |
| NM_014900 | COBLL1   | 1343 | 1394 | 5.13987188421      |
| NM_014900 | COBLL1   | 4700 | 4778 | 4.13586101509      |
| NM_014900 | COBLL1   | 3435 | 3513 | 5.13987861526      |
| NM_014900 | COBLL1   | 283  | 498  | 7.72484111599      |
| NM_014900 | COBLL1   | 1761 | 1888 | 5.13987861527      |
| NM_014900 | COBLL1   | 3079 | 3261 | 7.30980361671      |
| NM_014900 | COBLL1   | 802  | 885  | 5.13987837935      |
| NM_178169 | RASSF3   | 3230 | 3314 | 7.89791737831      |
| NM_178169 | RASSF3   | 907  | 983  | 7.48287987903      |
| NM_178169 | RASSF3   | 2535 | 2576 | 7.39874066964      |
| NM_178169 | RASSF3   | 2806 | 2874 | 8.21984547319      |
| NM_178169 | RASSF3   | 1862 | 1895 | 5.89389977813      |
| NM_178169 | RASSF3   | 2919 | 3000 | 7.48287987903      |
| NM_178169 | RASSF3   | 2589 | 2644 | 5.89389977813      |
| NM_178169 | RASSF3   | 1723 | 1766 | 6.81377816892      |
| NM_178169 | RASSF3   | 2051 | 2111 | 6.8979173783       |
| NM_178169 | RASSF3   | 989  | 1175 | 7.89791737831      |
| NM_178169 | RASSF3   | 101  | 199  | 6.89791737076      |
| NM_178169 | RASSF3   | 472  | 587  | 8.70527230036      |
| NM_178169 | RASSF3   | 372  | 465  | 8.21984547319      |
| NM_178169 | RASSF3   | 677  | 775  | 7.48287987903      |
| NM_152261 | C12orf23 |      | 771  | 865 9.03724006723  |
| NM_152261 | C12orf23 |      | 950  | 995 8.22987841412  |
| NM_152261 | C12orf23 |      | 2694 | 2779 8.81484764589 |
| NM_152261 | C12orf23 |      | 2561 | 2657 7.22988514517 |
| NM_152261 | C12orf23 |      | 513  | 602 7.81484091484  |
| NM_016657 | KDEL3    | 699  | 771  | 11.0727401585      |
| NM_016657 | KDEL3    | 132  | 211  | 9.93523663479      |
| NM_016657 | KDEL3    | 629  | 697  | 9.6133085399       |
| NM_016657 | KDEL3    | 370  | 444  | 9.6133085399       |
| NM_016657 | KDEL3    | 212  | 336  | 10.1982710406      |
| NM_016657 | KDEL3    | 494  | 628  | 10.420663462       |
| NM_053039 | UGT2B28  | 47   | 89   | 11.0441900367      |
| NM_053039 | UGT2B28  | 1099 | 1143 | 10.1697209188      |
| NM_053039 | UGT2B28  | 823  | 868  | 9.16972091879      |
| NM_053039 | UGT2B28  | 902  | 946  | 10.3921133401      |
| NM_053039 | UGT2B28  | 1374 | 1402 | 9.16972091879      |
| NM_053039 | UGT2B28  | 686  | 728  | 7.58475841052      |
| NM_053039 | UGT2B28  | 978  | 1092 | 11.2851981362      |
| NM_053039 | UGT2B28  | 1205 | 1311 | 10.3921133401      |
| NM_053039 | UGT2B28  | 114  | 192  | 9.90668651296      |
| NM_053039 | UGT2B28  | 1450 | 1518 | 10.1697209188      |
| NM_053035 | MRPS33   | 250  | 313  | 4.97114536096      |
| NM_017714 | TASP1    | 793  | 848  | 6.10345997414      |
| NM_022778 | CEP85    | 3072 | 3101 | 6.62943979573      |
| NM_022774 | DEM1     | 443  | 485  | 9.47226758869      |
| NM_022776 | OSBPL11  | 402  | 496  | 7.50389557875      |



|              |         |      |      |               |
|--------------|---------|------|------|---------------|
| NM_022776    | OSBPL11 | 3530 | 3605 | 6.50372182843 |
| NM_022776    | OSBPL11 | 4349 | 4440 | 7.08885807192 |
| NM_022773    | LMF1    | 341  | 439  | 11.1340251298 |
| NM_022772    | EPS8L2  | 1968 | 2070 | 3.29372725644 |
| NM_022772    | EPS8L2  | 751  | 808  | 3.29355350612 |
| NM_022772    | EPS8L2  | 1583 | 1635 | 3.20958804705 |
| NM_022772    | EPS8L2  | 1706 | 1770 | 5.29372724889 |
| NM_022772    | EPS8L2  | 3016 | 3097 | 3.28970965626 |
| NM_022772    | EPS8L2  | 2453 | 2523 | 4.29372702052 |
| NM_022772    | EPS8L2  | 1334 | 1393 | 3.29372724889 |
| NM_001111077 | EZR     | 952  | 984  | 5.6881196827  |
| NM_001111077 | EZR     | 2835 | 2966 | 7.69213728287 |
| NM_001111077 | EZR     | 1360 | 1404 | 5.60799807349 |
| NM_001111077 | EZR     | 406  | 477  | 7.69213728287 |
| NM_001111077 | EZR     | 2404 | 2448 | 6.6881196827  |
| NM_001111077 | EZR     | 2288 | 2365 | 8.27709978359 |
| NM_001111077 | EZR     | 251  | 375  | 9.01406537776 |
| NM_001111077 | EZR     | 708  | 896  | 8.49949220493 |
| NM_001111077 | EZR     | 3002 | 3046 | 6.69196353255 |
| NM_001111077 | EZR     | 98   | 241  | 8.01406537776 |
| NM_001111077 | EZR     | 2004 | 2096 | 5.69213728287 |
| NM_001111077 | EZR     | 508  | 661  | 9.01406537776 |
| NM_001111077 | EZR     | 2134 | 2273 | 8.01406537776 |
| NM_001097613 | GPR89A  | 829  | 874  | 9.11405765698 |
| NM_001097613 | GPR89A  | 1024 | 1052 | 8.44496267793 |
| NM_001097613 | GPR89A  | 1629 | 1680 | 7.52910165139 |
| NM_001097613 | GPR89A  | 953  | 1019 | 9.11406438803 |
| NM_001097613 | GPR89A  | 1073 | 1241 | 11.7770294008 |
| NM_001097613 | GPR89A  | 638  | 813  | 12.0526638434 |
| NM_001097613 | GPR89A  | 1816 | 1975 | 10.3364568094 |
| NM_001097613 | GPR89A  | 1375 | 1626 | 12.4832981977 |
| NM_001097613 | GPR89A  | 267  | 615  | 12.6583849043 |
| NM_001097613 | GPR89A  | 1245 | 1352 | 9.11406438803 |
| NM_001097615 | POLR2J3 | 993  | 1067 | 6.68141297813 |
| NM_001097615 | POLR2J3 | 613  | 667  | 6.68123923536 |
| NM_001097615 | POLR2J3 | 382  | 511  | 8.2663754864  |
| NM_001097615 | POLR2J3 | 69   | 151  | 6.68140625462 |
| NM_018936    | PCDHB2  | 543  | 583  | 8.25690753038 |
| NM_018936    | PCDHB2  | 974  | 1031 | 8.26092489463 |
| NM_018936    | PCDHB2  | 1357 | 1427 | 10.2609248946 |
| NM_018936    | PCDHB2  | 1161 | 1275 | 11.0682800526 |
| NM_020860    | STIM2   | 566  | 620  | 7.40970618253 |
| NM_020860    | STIM2   | 957  | 1016 | 7.99466844756 |
| NM_020860    | STIM2   | 2443 | 2522 | 9.40970618276 |
| NM_020860    | STIM2   | 864  | 918  | 8.40970618276 |
| NM_020860    | STIM2   | 2004 | 2049 | 7.40970594684 |
| NM_020860    | STIM2   | 2839 | 2891 | 7.40568858258 |
| NM_020860    | STIM2   | 241  | 306  | 6.40970594684 |
| NM_020860    | STIM2   | 163  | 234  | 6.40568858258 |
| NM_020860    | STIM2   | 2761 | 2836 | 7.99466195242 |

|           |        |      |      |               |
|-----------|--------|------|------|---------------|
| NM_020860 | STIM2  | 3068 | 3129 | 7.99466195242 |
| NM_020860 | STIM2  | 1191 | 1345 | 10.1101459009 |
| NM_020860 | STIM2  | 1458 | 1577 | 9.40970618276 |
| NM_020860 | STIM2  | 3459 | 3543 | 6.4096994517  |
| NM_020860 | STIM2  | 1353 | 1456 | 7.40970618276 |
| NM_020860 | STIM2  | 719  | 841  | 8.40970618276 |
| NM_020860 | STIM2  | 1028 | 1076 | 7.40970594684 |
| NM_020860 | STIM2  | 2140 | 2215 | 6.40970617521 |
| NM_020860 | STIM2  | 1775 | 1983 | 9.73163427764 |
| NM_020860 | STIM2  | 3633 | 3717 | 7.99466868326 |
| NM_020860 | STIM2  | 1080 | 1169 | 8.99466868348 |
| NM_020860 | STIM2  | 3275 | 3370 | 7.40970618276 |
| NM_203433 | PSMG1  | 557  | 637  | 5.46445585096 |
| NM_203433 | PSMG1  | 394  | 447  | 5.46444935582 |
| NM_203433 | PSMG1  | 649  | 782  | 7.78638418177 |
| NM_017774 | CDKAL1 | 607  | 668  | 6.87578590844 |
| NM_017774 | CDKAL1 | 457  | 521  | 6.87595292771 |
| NM_017774 | CDKAL1 | 2914 | 2959 | 6.87194205859 |
| NM_017774 | CDKAL1 | 1167 | 1226 | 8.87595942284 |
| NM_017774 | CDKAL1 | 76   | 150  | 8.87595965876 |
| NM_017774 | CDKAL1 | 1023 | 1094 | 6.87194205859 |
| NM_019048 | ASNSD1 | 1115 | 1164 | 5.09870535363 |
| NM_019048 | ASNSD1 | 1999 | 2070 | 7.18284455546 |
| NM_019048 | ASNSD1 | 1753 | 1821 | 7.17882696284 |
| NM_019048 | ASNSD1 | 1320 | 1360 | 6.09870535363 |
| NM_019048 | ASNSD1 | 835  | 906  | 5.18267081269 |
| NM_019044 | CCDC93 | 6454 | 6523 | 4.05047493484 |
| NM_019044 | CCDC93 | 2121 | 2183 | 2.96633572567 |
| NM_019044 | CCDC93 | 306  | 353  | 4.63141983561 |
| NM_019044 | CCDC93 | 5298 | 5334 | 2.96633572567 |
| NM_019044 | CCDC93 | 2420 | 2467 | 3.04645733489 |
| NM_019044 | CCDC93 | 3032 | 3085 | 3.05047492751 |
| NM_019044 | CCDC93 | 364  | 439  | 4.63543743577 |
| NM_019041 | MTRF1L | 481  | 528  | 5.79010556173 |
| NM_019042 | PUS7   | 2249 | 2325 | 6.81310308075 |
| NM_019042 | PUS7   | 3011 | 3040 | 6.81694693061 |
